# Supplementary material for: Glutamatergic supramammillary nucleus neurons respond to threatening stressors and promote active coping
Source: eLife. 2024 Jun 3;12:RP90972. doi: 10.7554/eLife.90972 (PMC11147510; doi:10.7554/eLife.90972)
Supplement: Figure 1—figure supplement 1—source data 1. [file elife-90972-fig1-figsupp1-data1.xlsx]

## Sheet: Vgat-Cre
	VGAT-Cre		Mouse 1				Mouse 2				Mouse 3
				eGFP	mCherry			eGFP	mCherry			eGFP	mCherry
			Section 1	6	171		Section 1	1	168		Section 1	3	88
			Section 2	0	176		Section 2	5	155		Section 2	2	114
		Total Cells		6	347			6	323			5	202

## Sheet: Vglut-Cre
	VGLUT2-Cre		Mouse 1				Mouse 2				Mouse 3				Mouse 4
				eGFP	mCherry			eGFP	mCherry			eGFP	mCherry			eGFP	mCherry
			Section 1	105	3		Section 1	224	4		Section 1	118	6		Section 1	269	10
			Section 2	115	5		Section 2	151	5		Section 2	113	5		Section 2	229	14
		Total Cells		220	8			375	9			231	11			498	24
