# Supplementary material for: Glutamatergic supramammillary nucleus neurons respond to threatening stressors and promote active coping
Source: eLife. 2024 Jun 3;12:RP90972. doi: 10.7554/eLife.90972 (PMC11147510; doi:10.7554/eLife.90972)
Supplement: Figure 3—figure supplement 1—source data 1. [file elife-90972-fig3-figsupp1-data1.xlsx]

## Sheet: 3-S1C- C57 cFos cell #
	Figure 3-S1C	C57BL/6J
				FST					Control
				Mouse 1	Mouse 2	Mouse 3	Mouse4		Mouse 1	Mouse 2	Mouse 3	Mouse 4
			Section 1	151	170	89	58		39	36	37	39
			Section 2	220	73	51	58		4	70	33	36
		Total # cells		371	243	140	116		43	106	70	75

## Sheet: 3-S1G-Vglut2-Cre cFos cell#
	3-S1G	VGLUT2-Cre
			FST																Control
			Mouse 1			Mouse 2			Mouse 3			Mouse 4			Mouse 5				Mouse 1			Mouse 2			Mouse 3			Mouse 4
			mCherry	eYFP	Both	mCherry	eYFP	Both	mCherry	eYFP	Both	mCherry	eYFP	Both	mCherry	eYFP	Both		mCherry	eYFP	Both	mCherry	eYFP	Both	mCherry	eYFP	Both	mCherry	eYFP	Both
		Section 1	136	135	18	140	135	14	108	172	21	115	119	12	131	232	28		90	53	4	225	16	6	189	19	8	122	26	12
		Section 2	210	60	20	153	196	47	173	129	14	129	90	11	195	222	44		86	17	1	236	7	4	197	53	8
		Total # cells	346	195	38	293	331	61	281	301	35	244	209	23	326	454	72		176	70	5	461	23	10	386	72	16	122	26	12
			FST	Control
		Colocalization (# of cells)	45.8	10.75

## Sheet: 3-S1I-Swim and Inmobile
	3-S1I	Vglut2-flp
			Mouse 1				Mouse 2				Mouse 3				Mouse 4				Mouse 5				Mouse 6				Mouse 7				Mouse 8
			Trial	Swimming	Immobility		Trial	Swimming	Immobility		Trial	Swimming	Immobility		Trial	Swimming	Immobility		Trial	Swimming	Immobility		Trial	Swimming	Immobility		Trial	Swimming	Immobility		Trial	Swimming	Immobility
			1	29.75	0.25		1	27.92	2.08		1	27.4	2.6		1	30	0		1	23.33	6.67		1	30	0		1	29.65	0.35		1	30	0
			2	30	0		2	30	0		2	30	0		2	30	0		2	29.47	0.53		2	30	0		2	28.37	1.63		2	30	0
			3	29.64	0.36		3	30	0		3	30	0		3	30	0		3	30	0		3	30	0		3	30	0		3	30	0
			4	29.2	0.8		4	30	0		4	28.86	1.14		4	30	0		4	30	0		4	30	0		4	30	0		4	30	0
			5	30	0		5	30	0		5	29	1		5	30	0		5	30	0		5	30	0		5	29.34	0.66		5	28.9	1.1
			6	30	0		6	30	0		6	28.79	1.21		6	30	0		6	30	0		6	30	0		6	30	0		6	29.52	0.48
			7	30	0		7	28.12	1.88		7	30	0		7	30	0		7	30	0		7	30	0		7	30	0		7	29.73	0.27
			8	29	1		8	29.37	0.63		8	30	0		8	30	0		8	30	0		8	30	0		8	29.39	0.61		8	29.71	0.29
			9	29.5	0.5		9	30	0		9	29	1		9	30	0		9	30	0		9	29.59	0.41		9	30	0		9	29.38	0.62
			10				10	30	0		10	29.33	0.67		10	29.39	0.61		10	26.09	3.91		10	30	0		10	29.73	0.27		10	30	0
			Information
			Vglut-flp mice were exposed to 10 "dunk" FST trials of 30s each
			total swim time (s)											Immobility (s)
		Trial	Mouse 1	Mouse 2	Mouse 3	Mouse 4	Mouse 5	Mouse 6	Mouse 7	Mouse 8	Average per trial		Trial	Mouse 1	Mouse 2	Mouse 3	Mouse 4	Mouse 5	Mouse 6	Mouse 7	Mouse 8	Average per trial
		1	29.75	27.92	27.4	30	23.33	30	29.65	30	28.5062		1	0.25	2.08	2.6	0	6.67	0	0.35	0	1.49375
		2	30	30	30	30	29.47	30	28.37	30	29.73		2	0	0	0	0	0.53	0	1.63	0	0.27
		3	29.64	30	30	30	30	30	30	30	29.955		3	0.36	0	0	0	0	0	0	0	0.045
		4	29.2	30	28.86	30	30	30	30	30	29.7575		4	0.8	0	1.14	0	0	0	0	0	0.2425
		5	30	30	29	30	30	30	29.34	28.9	29.655		5	0	0	1	0	0	0	0.66	1.1	0.345
		6	30	30	28.79	30	30	30	30	29.52	29.7888		6	0	0	1.21	0	0	0	0	0.48	0.21125
		7	30	28.12	30	30	30	30	30	29.73	29.7312		7	0	1.88	0	0	0	0	0	0.27	0.26875
		8	29	29.37	30	30	30	30	29.39	29.71	29.6837		8	1	0.63	0	0	0	0	0.61	0.29	0.31625
		9	29.5	30	29	30	30	29.59	30	29.38	29.6837		9	0.5	0	1	0	0	0.41	0	0.62	0.31625
		10		30	29.33	29.39	26.09	30	29.73	30	29.22		10		0	0.67	0.61	3.91	0	0.27	0	0.78
			total % swim time											total % immobility time
		1	99.1667	93.0667	91.3333	100	77.7667	100	98.8333	100	95.0208		1	0.833333	6.93333	8.66667	0	22.2333	0	1.16667	0	4.97917
		2	100	100	100	100	98.2333	100	94.5667	100	99.1		2	0	0	0	0	1.76667	0	5.43333	0	0.9
		3	98.8	100	100	100	100	100	100	100	99.85		3	1.2	0	0	0	0	0	0	0	0.15
		4	97.3333	100	96.2	100	100	100	100	100	99.1917		4	2.66667	0	3.8	0	0	0	0	0	0.808333
		5	100	100	96.6667	100	100	100	97.8	96.3333	98.85		5	0	0	3.33333	0	0	0	2.2	3.66667	1.15
		6	100	100	95.9667	100	100	100	100	98.4	99.2958		6	0	0	4.03333	0	0	0	0	1.6	0.704167
		7	100	93.7333	100	100	100	100	100	99.1	99.1042		7	0	6.26667	0	0	0	0	0	0.9	0.895833
		8	96.6667	97.9	100	100	100	100	97.9667	99.0333	98.9458		8	3.33333	2.1	0	0	0	0	2.03333	0.966667	1.05417
		9	98.3333	100	96.6667	100	100	98.6333	100	97.9333	98.9458		9	1.66667	0	3.33333	0	0	1.36667	0	2.06667	1.05417
		10	0	100	97.7667	97.9667	86.9667	100	99.1	100	85.225		10	0	0	2.23333	2.03333	13.0333	0	0.9	0	2.275
