# Supplementary material for: Glutamatergic supramammillary nucleus neurons respond to threatening stressors and promote active coping
Source: eLife. 2024 Jun 3;12:RP90972. doi: 10.7554/eLife.90972 (PMC11147510; doi:10.7554/eLife.90972)
Supplement: Figure 3—figure supplement 1—source data 2. [file elife-90972-fig3-figsupp1-data2.xlsx]

## Sheet: Mouse 1_Velocity
0
3.43899
3.19752
3.8934
3.78033
2.58298
2.53683
3.26731
2.40088
0.887191
0.436543
0.844551
0.174169
0.511247
0.179878
0.274519
0.477667
1.27548
3.13076
3.04885
1.92939
4.08931
2.41172
1.19873
0.709066
1.09549
0.227008
0.172216
0.115805
0.399685
0.542011
1.32835
0.582513
1.4097
2.46438
2.38128
1.67166
1.0782
1.28065
1.43687
2.16563
3.10055
2.98762
3.37556
3.7221
4.46745
4.26058
4.56675
4.13485
4.21029
3.85817
4.93441
3.94824
3.42699
2.23477
1.74949
2.76619
5.11338
5.34159
5.45035
3.41538
2.72468
2.60687
0.691727
1.15687
1.1358
0.803876
2.12494
2.53762
2.28096
1.61506
0.576178
1.17438
1.12561
1.44295
2.7354
5.21862
2.43255
0.658511
0.391399
0.10992
0.201031
0.109377
0.0616719
0.0629485
0.114187
0.0461015
0.0768223
0.0396101
0.0645227
0.0546027
0.0112616
0.120621
0.106784
0.0920514
0.147033
0.0369622
0.108406
0.0596231
0.0568122
0.0614308
0.0654724
0.0848446
0.0781942
0.0367695
0.0168351
0.0421485
0.0164907
0.0942954
0.0875429
0.037095
0.0354848
0.0862156
0.0623338
1.08922
0.430229
0.664098
0.133449
0.471843
0.0954328
0.164623
0.114505
0.0957029
0.0701571
0.0704939
0.103018
0.0661378
0.095077
0.0491225
0.0734896
0.0280849
1.21006
0.401071
0.299194
0.76287
0.983539
1.22058
0.800505
0.541696
0.156619
0.325018
0.331098
0.401135
0.0997622
0.0780729
0.117099
0.0928483
0.130552
0.262693
0.33067
0.0523823
0.0755923
0.0949784
0.032227
0.113949
0.092024
0.0663018
0.135234
0.152963
0.104811
0.653396
2.58063
0.33905
0.521879
0.829033
1.68977
1.40437
0.662824
7.4676
12.8723
3.29281
2.90896
2.56911
3.04806
1.69874
0.474293
0.109442
0.408724
0.0859702
0.0837447
0.0105533
0.256015
0.0556742
0.0554831
0.661991
1.57662
0.126051
1.29873
0.272062
0.813209
1.08277
0.723294
1.04375
1.23636
0.941163
0.775893
0.377668
0.323338
1.71443
1.3574
1.31189
4.03027
1.28816
1.10486
0.442398
0.859783
1.54047
0.836117
2.77955
1.07254
0.170674
0.286474
0.783877
0.449906
0.480225
0.112139
0.0748696
0.148947
0.303389
0.388579
0.384633
0.326855
0.384944
0.234296
0.577274
0.414604
0.85281
0.521816
0.223733
0.818491
2.17404
0.150706
0.335863
0.374801
1.30878
1.00238
0.737144
0.188772
0.315331
0.0736182
0.18959
0.895329
0.147315
0.0336164
0.940762
0.0453163
0.0694006
0.15077
0.108512
0.364999
0.139151
0.174715
0.219818
0.0984823
0.0295619
0.0680879
0.127725
0.291445
0.34529
0.668725
0.230798
1.26325
4.99372
6.54409
4.10689
4.941
5.71138
4.94813
5.64864
4.93446
6.07931
6.15754
5.82011
7.06691
6.22071
4.07945
5.15306
4.93195
5.0167
2.04027
1.379
0.480087
0.948288
2.77729
3.29533
1.66568
1.93286
0.502325
0.430083
6.71233
0.341625
0.82379
1.14144
1.82858
1.89784
0.474943
0.225718
0.476892
0.441955
0.357467
0.454894
0.415927
0.628504
0.0802819
0.166258
0.409369
0.609279
0.744641
0.368248
1.70493
2.85322
3.1936
3.20959
3.09857
6.30874
4.03557
1.47733
1.8236
2.04095
1.4548
0.365166
0.490723
0.113845
0.214525
0.422086
1.3576
4.25765
5.58409
4.74713
3.8146
1.5838
2.22513
3.21204
3.16882
3.82954
3.49287
3.00859
1.19961
1.1799
0.788616
1.11697
1.89368
2.95532
0.655832
3.80789
4.27522
8.6137
2.83022
4.09964
4.85826
2.10534
2.36825
4.15659
2.25867
0.461954
0.522498
6.37007
0.317799
6.06666
1.51785
0.626968
9.02164
1.17171
0.56939
1.39405
1.9529
2.33656
0.972569
0.61199
0.725709
0.155541
0.208744
0.493411
1.22022
0.702752
0.286222
0.637341
0.616
1.47799
1.74443
1.36797
3.0786
4.39465
2.24765
0.81435
1.55887
0.691783
0.864728
0.982977
1.74524
2.22862
2.4596
3.7769
4.52917
3.58159
2.37372
8.10858
1.24626
1.18391
1.0088
1.59546
0.25697
7.85375
0.46601
2.40227
3.88618
4.23252
4.35901
3.9213
4.80117
3.80698
1.34003
0.469653
0.758855
0.772266
1.29887
0.649145
1.76652
0.736713
1.21509
0.927989
0.444105
0.264742
0.431892
0.0643473
0.124593
0.101389
0.124873
0.119156
0.0541105
0.189142
0.0770884
0.0611978
0.12565
0.104157
0.165012
0.42209
0.153795
0.131751
0.407976
0.120722
0.69852
0.693885
0.289551
0.693934
0.27581
0.580041
0.651654
2.2978
0.237847
0.491244
1.93627
3.94269
4.48348
4.18518
5.0169
5.40869
4.89649
4.44726
0.306846
1.71587
0.708477
1.20573
2.50701
0.29394
1.47194
1.06487
0.854577
0.855447
0.471722
1.9907
0.452643
0.986151
2.60982
2.76117
1.71961
0.682674
0.437316
0.602016
1.59897
1.95354
0.116724
0.0704912
0.128442
0.0423672
0.165247
0.176951
0.0863669
0.134842
0.0738617
0.644932
0.704949
0.15977
0.20137
0.0622068
0.12345
0.00119806
0.153983
0.0652537
0.0170808
0.00978259
0.045243
0.0428054
0.0696303
0.0684293
0.0548877
0.0838723
0.162098
0.566927
0.652591
0.633183
0.158803
0.0541587
0.189897
0.697399
0.0217614
0.24318
0.1293
0.326025
0.172293
0.203369
0.0715086
0.0650623
0.132655
1.2676
1.06815
0.94015
0.186041
0.171363
0.0881629
0.114439
0.0650638
0.0721168
0.230344
0.105447
0.0649866
0.0966399
0.0995009
1.00338
0.169382
0.810821
0.450333
0.214029
0.18139
0.148912
0.091629
0.0980077
0.277261
0.0660497
0.106714
0.041506
0.2294
0.0679354
0.0328249
0.0823887
0.0969308
0.125164
0.123177
0.191769
1.36569
0.381353
0.367534
0.472359
0.829787
2.72979
1.41584
3.93729
3.31769
3.36051
3.60375
4.03648
2.19779
3.3901
4.60643
4.11012
4.37066
2.92945
3.88637
3.95514
4.46738
6.04452
3.83716
1.16518
1.85875
1.75282
3.81401
5.06738
4.54304
3.41286
4.02803
3.49522
2.56153
1.55014
1.02088
1.07559
1.76759
4.10811
3.68917
2.75789
4.67966
3.23753
3.70794
3.27692
3.83599
1.30945
1.42641
2.68905
4.20826
4.1963
2.96191
4.7674
3.81611
4.26016
4.56139
5.75987
1.80089
3.94999
2.85911
3.51006
3.44244
2.77974
2.55179
2.61048
2.02223
0.812645
0.955431
0.505503
1.93652
1.52952
1.55075
1.13973
0.868906
1.51612
8.50814
5.51374
0.467554
0.400998
7.44708
0.454982
0.302976
0.572365
6.24276
0.144648
0.857692
1.48896
0.241354
0.584127
1.7726
11.302
0.373579
0.841875
10.6984
0.992991
0.902236
2.07859
0.883401
0.75804
1.44029
2.06151
4.02811
1.62458
1.34419
0.45068
1.41872
2.21588
3.36336
1.94785
2.6783
3.4835
2.43994
3.504
2.07434
0.504177
1.408
0.559556
1.33016
2.30385
1.95283
2.88305
2.64599
2.42356
1.92538
2.98348
2.23697
2.04602
4.00892
4.91673
4.74734
4.41015
3.38827
6.54578
5.31219
6.47585
4.15855
3.96581
5.69587
3.85033
2.31777
3.76086
4.42341
4.28279
3.23051
4.78971
3.64774
3.05787
1.8689
0.994232
0.586287
9.53078
1.43188
11.8778
1.36113
1.71006
2.01528
3.2434
2.99296
2.76989
2.47435
2.40266
3.6772
42.7975
2.10893
2.54504
2.40603
1.71597
1.21889
1.88064
1.65242
3.48603
2.32021
3.00748
3.3898
4.38767
3.57132
2.40631
3.44795
2.57417
0.947726
0.293077
0.253498
0.241113
0.913461
1.05642
0.54692
0.135932
1.83573
3.70662
2.59471
0.735142
0.339212
1.9452
2.56294
0.0998168
0.730368
1.40814
0.826684
0.627477
0.213231
0.0836422
0.349703
0.884828
1.15384
6.6833
0.70978
0.969116
0.696932
1.06729
0.63551
0.817255
0.792197
1.01709
0.191577
0.428865
0.278849
0.52377
0.803175
0.39017
0.388379
0.119769
0.100694
0.251843
0.538272
0.364716
0.39278
0.0692136
0.0351141
0.111232
0.136573
0.541135
0.45814
0.0829671
0.225688
0.481871
1.17169
1.65155
0.606845
0.559082
0.84039
0.707067
0.634837
0.48592
0.305065
0.217227
0.245605
0.179769
0.0924459
0.166164
0.0587697
0.0092856
0.115354
0.0169157
0.0930904
0.433569
0.541576
0.258906
0.173865
0.567088
1.19779
4.18793
4.73029
4.39947
5.9264
3.65676
2.86575
4.38084
5.56206
5.67662
3.92258
3.26972
1.83715
2.91777
2.00555
3.31302
5.535
5.04546
2.35435
1.34468
1.24982
0.867761
1.60282
1.0789
3.23113
3.16785
1.81086
1.48472
2.04309
0.419169
0.48925
1.44525
0.0736505
0.779518
0.75829
0.246971
0.879029
0.964616
0.905871
1.38196
0.145065
0.650234
0.204693
1.14112
0.711604
0.0173912
0.14788
0.0926617
0.783488
0.478694
0.0877529
0.962815
0.688753
0.0858042
0.719682
1.1153
0.850963
0.190885
0.606041
0.375703
0.751724
0.935947
1.3304
1.61413
0.965794
0.205636
0.899088
0.725274
0.338221
0.32823
0.463958
0.181689
1.70775
3.31569
5.92227
3.38767
4.3383
5.89907
4.647
4.79693
6.18569
4.79636
4.17704
5.31785
5.39936
5.65377
6.94096
5.37164
6.30261
3.73967
3.03731
3.84012
4.97375
2.94128
1.85532
0.784608
0.909846
0.432478
0.74688
1.53275
1.0576
3.11484
2.60422
2.08583
3.25723
1.83424
0.455064
0.758987
0.891659
0.53027
1.04002
0.348065
0.273943
0.607718
0.690563
1.52996
2.23666
1.79144
1.03203
3.38359
5.76347
5.28103
4.05527
2.53816
4.35535
4.4451
2.6845
2.0204
2.65797
4.20044
3.8088
3.89986
3.29961
4.37248
4.31619
3.6814
2.74616
2.17981
1.44444
2.79184
2.91637
1.62187
0.712028
1.01005
0.825351
4.86043
2.97522
2.83324
0.31728
0.774733
15.0381
1.69997
0.88696
7.40496
1.32689
1.20881
1.49664
0.409249
0.321107
0.191907
0.670492
0.910397
9.41974
9.67569
8.50872
0.763273
2.26682
11.199
1.8947
0.346899
0.227244
0.240972
0.316673
2.12264
1.47419
0.877115
0.750754
0.351906
0.0565233
0.319066
0.087624
1.13079
0.73216
0.81074
0.337626
0.354098
0.152136
0.41068
0.704581
0.160187
0.379432
0.717881
0.586068
1.57637
0.491037
1.45688
0.187706
0.132551
0.365116
0.658437
0.619738
0.168715
0.144968
0.108229
0.181046
0.133616
0.182204
0.272316
0.864368
0.185988
9.39886
0.910152
1.96322
1.56777
0.861727
0.368725
1.28243
0.508742
2.63232
6.55364
4.58528
6.98071
1.02758
4.23432
3.72001
0.930423
2.28682
4.24353
3.3135
3.17654
1.57223
7.05961
0.0323135
0.610161
0.520242
0.830636
1.20332
1.11186
1.78894
0.360489
0.924711
2.03991
4.50357
2.43015
0.675581
1.09249
2.06978
2.26008
1.69745
1.89749
0.657988
0.825201
1.37643
1.35897
3.11077
5.18099
2.49925
1.29827
0.397457
1.60387
3.07521
3.91884
2.492
4.04153
2.3536
2.50804
1.76455
1.86031
1.92236
3.02292
2.78934
2.44642
0.829773
0.476907
1.42386
1.2395
2.06675
2.83151
3.63833
2.23742
1.38309
2.2285
0.795006
1.86795
1.34519
0.498914
1.32444
0.399729
1.09713
0.459586
0.534697
2.87443
1.73555
2.66234
4.09838
4.71477
3.24264
2.21472
1.21195
2.12242
1.83666
2.81507
2.13848
2.89121
3.32123
2.11505
1.2984
2.44117
4.50489
6.44607
4.02003
4.67337
5.44495
2.4031
1.06773
0.895938
1.74221
3.55185
2.07504
0.367129
2.06
2.84926
1.87799
1.87834
0.954099
2.53512
8.29475
0.622132
0.491085
0.829739
0.50795
0.83112
2.08844
0.319906
0.327888
0.335084
0.633712
0.975996
0.47674
9.11069
0.668525
0.736533
0.526386
0.926492
0.667936
0.359177
0.725126
0.883899
0.781802
0.0848356
1.73705
0.504408
1.25549
0.738571
0.473534
0.501875
3.3061
2.64344
2.4383
0.958489
1.18262
1.24012
0.1389
0.736271
0.479042
1.01149
0.879526
0.632006
1.12292
0.138473
1.53906
0.801312
0.54745
0.782857
0.511842
1.48908
1.18368
0.556121
1.51343
1.71571
0.472873
0.392514
0.420265
0.429357
0.386419
0.158926
0.0800233
0.175433
0.110081
0.239045
1.20693
1.62842
1.68283
0.0890967
1.38509
1.27791
0.284376
0.252031
0.10725
1.05275
1.20121
0.298931
0.0795301
1.36529
0.195429
0.17964
0.240361
1.12156
1.43103
0.331464
1.70195
1.99117
0.550696
0.258343
0.682888
1.60993
2.31015
1.83415
1.56162
0.493538
2.14359
1.19456
0.477345
0.845622
0.708098
0.394737
4.36444
6.20139
5.53398
3.4722
3.10514
4.93254
4.97191
3.53217
3.24573
5.07239
2.7402
2.98065
1.59038
2.89188
3.32102
3.29668
2.32879
1.63084
2.82501
3.41109
3.8122
3.47116
3.15828
3.38357
2.65969
1.55628
9.16476
0.729387
0.987275
0.268158
0.351302
1.18558
0.532606
0.407441
1.96331
0.473777
0.580719
0.771202
0.543147
2.12876
0.948551
1.05897
2.04417
0.330893
0.651413
1.4049
0.459324
1.18927
1.60737
1.34442
0.333421
7.22607
1.08579
1.38536
1.67944
1.36126
0.180279
1.32728
0.486115
1.52957
0.148295
0.30394
0.10827
0.302791
0.333857
0.164537
0.172498
0.196058
0.168473
0.0897933
0.109386
0.185012
0.180274
0.305978
0.175985
0.134225
0.214307
0.231806
0.577992
2.00425
1.04892
0.0926768
0.326664
0.479528
0.511251
0.416535
0.329933
0.658833
0.164488
0.0613433
0.379039
0.192817
0.511191
0.118428
0.349967
0.51147
0.0863127
0.214715
0.176903
0.0367292
0.116862
0.610227
0.291426
0.49014
0.105625
0.76878
0.531533
0.479934
0.652387
0.374991
0.683599
1.38594
0.896363
0.841011
2.75897
2.39673
3.08702
1.85842
1.22874
2.83559
2.92869
1.98916
1.54678
1.18677
1.03768
0.666903
0.295221
0.622626
0.221236
0.227542
0.276511
0.7592
0.173169
0.376883
0.150427
0.179646
0.0700501
0.283767
0.205362
0.0251385
0.0594785
0.0569562
0.160952
0.105432
0.292132
0.0598475
0.0808479
0.263738
0.419546
0.0921262
0.0653827
0.654759
0.456653
0.686899
0.792837
1.00361
0.657608
1.17885
1.86755
0.524705
0.79991
0.149803
0.452397
1.24722
0.494881
0.60709
0.805786
1.65428
1.22325
2.16653
1.94889
1.98048
1.7567
0.975928
0.950838
1.7219
1.81986
0.683846
1.5331
1.7242
1.27825
4.24683
0.49554
1.01197
0.135333
0.423886
0.289509
1.18915
0.570051
1.75477
1.30209
2.06842
1.03872
0.287668
0.577577
1.00199
0.788016
0.0577288
0.396814
0.150221
1.70054
1.30606
1.58193
1.27187
1.28066
0.772616
0.0917543
0.500386
0.405273
0.237845
0.0320157
0.0370045
0.148707
0.206436
0.176982
0.19119
0.179568
0.0639399
0.151138
0.164609
0.0930779
0.174307
0.170297
0.0759644
0.103397
0.220559
0.122545
0.224313
0.245393
0.816998
1.51641
1.47253
1.79658
0.475634
0.350909
0.393517
0.0850793
0.200332
0.113259
0.291592
0.133943
0.144218
0.208796
0.183512
0.0690603
0.141973
0.0693082
0.0433072
0.15112
0.249663
0.110189
0.291354
0.184408
0.31244
0.221308
0.632681
0.298109
0.410119
0.68336
0.812751
0.48149
1.91485
1.27887
0.497477
0.653671
0.219536
0.882286
0.0405181
0.336703
1.12286
1.08506
1.97134
1.07764
2.45062
2.25529
3.37719
2.14259
2.23269
2.34604
1.68238
1.27088
1.52405
0.353667
0.348528
0.135114
0.591345
0.664907
0.137925
0.0651819
0.412034
0.550816
0.338541
0.848065
0.473015
0.781543
0.919675
1.65701
1.76101
0.957161
0.581266
0.672475
1.01585
0.782159
1.32208
1.70626
4.45794
1.85245
1.88953
3.05395
2.61501
2.07381
1.79108
1.33946
4.13807
5.07683
7.53414
6.07252
4.79503
3.69659
3.88091
4.26031
4.54457
5.37318
3.34751
2.99419
0.500889
0.144775
0.516545
0.295391
0.529195
0.655346
0.502066
0.711324
0.955017
1.53485
1.0031
1.02456
0.769953
0.541939
0.64658
0.421392
0.386718
0.130241
0.644643
0.746807
0.880272
2.88339
3.32916
3.2676
1.0671
1.10912
3.37619
4.76057
4.58197
2.42462
0.290815
4.12602
2.19613
2.56059
1.57278
0.353445
2.82477
2.82263
1.86953
2.86248
3.45917
1.01862
7.47426
0.720197
0.508763
2.35783
2.03326
11.0712
0.135293
0.367878
0.546556
0.557801
0.808712
11.285
0.920077
0.801124
0.877005
0.973078
0.50506
0.275158
1.11671
0.252263
0.476156
0.350896
0.761196
3.74375
2.08879
2.23238
3.29347
3.20427
2.83377
5.73562
3.25874
1.5933
4.95635
3.97524
4.9143
1.70156
2.69249
0.610667
1.90743
1.89493
2.7587
3.27808
2.71221
3.57851
3.84212
3.55541
4.24614
4.24095
4.32491
4.46719
6.35744
2.52558
3.20459
3.51777
0.915773
0.704131
0.192659
2.02725
5.38655
1.80242
1.32626
0.283922
1.16747
0.49822
0.227463
0.0908598
0.595363
0.07014
0.561567
0.763787
0.176451
0.311139
0.319534
0.326151
0.27723
0.446745
0.449169
0.685677
1.30969
5.10394
7.00607
6.69478
0.47217
0.859846
0.655762
0.359925
1.16074
0.79973
0.54858
7.17896
0.763218
7.8451
0.185125
8.01752
0.274803
0.347047
0.197376
0.206145
0.236146
0.172926
0.0991796
0.290665
0.158719
0.862949
0.347774
0.423063
0.352569
0.0997064
0.472559
0.44546
0.144075
0.171619
0.323123
0.228428
0.360475
1.22032
2.28512
3.13849
2.76353
2.696
1.33586
0.685791
9.37868
1.8117
1.97374
1.6185
1.93525
0.892934
1.80136
1.87916
1.89092
0.575853
1.38634
0.484753
2.74571
5.33298
1.08313
1.90222
1.84078
1.85691
2.27026
2.61576
2.50286
4.23641
3.91361
2.6556
1.78114
1.57483
0.361815
0.586139
2.41762
2.73821
1.96232
2.03182
2.25275
1.30991
0.163226
0.729631
0.4039
0.198371
0.108285
2.39703
2.49532
2.05235
2.38221
0.693887
0.228072
0.598706
0.183822
0.456924
1.11746
1.1942
0.523643
1.29908
1.97404
2.22918
2.37752
1.79237
1.26974
0.035565
0.614665
1.09427
0.251639
0.0683558
0.220002
0.135618
0.0902112
0.196016
0.207786
0.140286
0.0778177
0.0738164
0.411208
0.719056
1.1952
0.982665
0.441495
0.0822189
0.310473
0.417257
1.11599
2.18585
3.07117
3.42145
2.22664
1.58572
0.677297
1.93602
2.87069
3.10171
3.00389
3.10371
2.44908
1.10532
1.70102
2.35879
2.29784
0.63346
3.06244
0.456988
1.01961
1.09377
2.18984
0.860237
1.83827
1.64793
1.65373
0.670209
0.414517
0.91636
0.319498
1.02817
0.927971
3.73874
0.406666
3.79568
0.393942
0.623753
0.779192
0.627767
1.59952
1.16122
0.743357
1.2708
1.84753
0.887722
0.784312
0.744182
0.143643
0.360742
0.269203
0.381326
0.757987
0.512099
0.461141
0.930632
2.08263
0.495545
0.602654
0.417458
0.153616
0.463992
0.578339
1.04223
1.80303
1.99908
1.21747
2.68904
1.72097
1.28184
1.22539
2.48224
3.72025
3.04502
3.73253
2.51308
3.19149
3.0255
2.03813
0.860262
0.539369
2.30191
4.68125
4.99917
3.76364
4.91984
6.29178
5.41046
3.84802
3.97862
3.1252
3.67389
0.642858
1.0207
0.387535
0.37982
1.00269
0.256065
0.250813
0.0504258
0.680921
0.313586
0.179433
0.853547
1.06827
0.833469
0.690738
0.584824
0.168984
0.200087
0.381246
0.414463
0.134081
0.465661
0.203486
0.382805
0.471533
0.633787
0.203242
0.112352
0.509436
0.536465
0.244246
0.479639
3.02873
3.42597
2.6133
1.93078
2.59056
2.5766
3.07997
0.594887
1.00896
7.20884
4.84043
1.90926
3.69696
4.68421
4.95595
4.96422
3.12775
1.7815
3.46144
1.75486
3.61694
3.79653
5.29809
3.67946
3.7942
1.91489
0.456936
1.02718
0.111075
0.146677
0.967886
0.0969923
0.135847
1.17943
0.185105
0.543465
0.634206
1.60003
1.37441
0.524475
8.83553
8.81447
1.6223
1.61748
4.86261
9.42068
4.48123
8.94242
2.5021
2.74836
10.1776
0.364549
0.743947
1.87754
0.612792
0.601201
0.635582
1.211
0.873755
0.515675
0.685229
7.20788
0.798832
1.31473
0.576143
1.5297
[truncated: 10,012 more rows]

## Sheet: Mouse 2_Velocity
0
1.68185
2.31851
3.38803
1.90052
3.9082
0.978801
3.63835
1.22655
1.29172
3.26258
3.58671
3.18752
3.45945
0.994767
1.87211
3.6169
6.68776
0.452855
3.73046
1.63296
1.80031
0.08688
0.124929
5.12132
0.508192
0.902948
0.904787
1.58023
7.3616
1.53499
2.48486
1.61551
2.94338
1.53623
0.61504
1.69835
0.936508
4.72742
3.1401
2.26211
2.20396
27.8317
1.20541
31.7761
33.1412
0.581284
1.31748
2.68578
4.00351
4.15184
3.57368
4.05979
6.08429
3.66382
2.55908
2.33234
1.94439
3.33159
4.03504
3.82386
3.02556
0.751948
1.71446
1.84543
0.348881
0.310419
0.803144
1.03467
0.0519537
0.633684
0.959824
1.72726
0.765057
0.387412
0.477468
0.219612
0.183859
0.349952
0.461553
0.267206
3.74863
0.125042
0.868695
0.470535
2.58519
0.849717
0.573492
2.75493
0.78244
0.193292
1.77832
1.88628
0.318219
0.299918
0.730664
0.516646
0.835848
0.597958
0.537146
0.465497
2.73103
2.19605
2.15602
0.929232
1.01664
1.88204
1.12961
2.73091
2.02645
2.43558
0.792188
0.900018
0.877958
0.37732
1.21518
1.77475
2.85211
2.20379
6.88873
3.63009
4.6771
6.94411
5.20634
0.958745
1.42236
0.59737
0.112928
1.25619
0.335905
1.66625
0.311059
1.1435
2.41883
4.47004
3.08923
4.48037
4.21402
3.66971
1.92854
1.71021
1.64636
0.517907
0.86401
0.531301
0.166789
0.639768
0.842744
3.17027
2.6939
3.60849
5.97088
1.57044
2.25341
0.638161
1.51936
1.16161
0.899046
1.10511
0.311927
3.01044
0.602317
0.240809
1.32979
2.11927
1.96454
1.78806
0.340866
1.8004
0.381003
1.3719
1.65566
2.67601
4.15942
5.79971
5.96615
4.74791
3.75284
5.36515
3.59574
2.09083
6.78375
4.3736
8.77667
2.07131
2.39629
3.0381
3.18172
3.3128
2.02039
1.19144
4.435
0.164857
1.41993
0.902629
1.68192
1.76341
3.27559
5.49597
4.33907
1.66496
3.02448
0.607609
0.764963
0.916003
0.803756
1.79509
2.08113
14.0942
10.8672
0.292999
8.76887
0.687678
0.6336
0.635323
0.329214
10.4635
1.10886
1.07572
0.773987
0.579178
8.80044
0.834193
3.52957
2.61529
0.733298
1.19588
0.945275
1.64611
0.119849
1.04152
0.960775
3.14984
2.01334
0.752891
1.17326
1.97365
0.183952
0.909746
0.948123
2.12786
1.91354
2.1762
0.681503
0.667165
1.17269
1.37568
2.079
0.561009
0.124885
2.50841
0.390351
0.146288
0.0788186
0.296842
1.1689
0.632923
0.234922
3.36119
3.73844
5.98136
2.36116
4.60989
1.30499
1.05551
0.658682
0.921157
3.63703
0.561437
5.2025
0.556063
0.302486
0.342518
0.786533
0.140396
0.0519089
0.334046
0.186944
0.294292
0.219168
3.76562
1.68395
3.1716
2.9122
3.55693
1.48338
4.21009
0.989703
2.09453
1.24779
1.45866
1.49109
2.34749
3.49537
5.38675
6.08484
5.30283
6.18723
4.00305
5.19086
4.46488
5.61782
5.11016
4.50529
2.94107
3.87462
1.06326
4.83529
1.66961
4.68686
3.42377
4.7093
2.12669
1.93292
1.8179
3.74181
5.3593
12.023
10.2308
13.1218
1.78891
1.29521
2.32699
0.883184
0.635395
1.10953
0.453541
3.4967
1.38261
0.430758
2.55688
2.80974
0.38724
0.321855
1.08443
1.20008
1.64801
0.621216
1.22251
1.41947
2.45458
2.00174
1.02486
1.01082
9.34832
0.149406
0.536723
9.48511
0.130106
5.64283
0.145667
0.687323
5.87442
9.4008
0.526361
0.276134
0.736934
0.244993
0.268945
0.410323
0.372891
0.184897
0.165075
0.626278
0.22121
0.442734
0.792942
0.197602
0.246907
0.570556
3.43085
0.232876
0.109716
0.555278
0.643985
4.87615
2.61288
1.95313
1.48481
2.37471
0.340818
3.83589
0.691341
0.0214946
0.267621
0.171042
0.791706
0.370192
0.614505
3.8981
3.85466
0.886082
1.88588
0.28174
0.3807
3.4323
0.50986
3.19747
0.119335
0.551036
3.56455
0.468247
3.83905
3.07937
3.25326
0.55273
5.91835
3.00439
1.81617
3.43944
0.298874
1.07388
1.4906
2.03935
3.23601
5.04095
21.9268
0.17684
0.770673
0.605721
0.334456
7.31318
0.321615
0.178855
1.84688
1.99877
0.400318
0.410363
2.0058
0.150771
0.704702
0.394804
0.720277
0.313854
0.325155
0.116514
0.223593
0.41249
0.0808718
0.452066
0.603009
0.00804719
0.265187
0.210433
4.87338
0.342506
0.35253
9.01047
0.265873
0.213922
9.47591
8.466
0.0353195
0.084488
9.80073
4.89532
5.62711
1.96125
1.09363
0.559931
0.429039
0.144908
0.726444
3.97232
3.93102
11.8391
4.18078
4.41744
3.8229
2.42333
7.509
3.43448
3.59705
4.16885
3.91024
6.11751
2.89954
4.66747
2.82089
4.23484
5.52399
1.47286
0.659888
1.21766
2.03132
2.32409
3.78623
1.17782
0.511393
16.8991
16.1961
0.0633792
0.156179
0.0379468
1.75421
16.294
15.953
1.17485
1.29812
0.723663
1.0586
0.841239
0.950602
0.572273
0.862928
1.31252
3.49064
3.13387
2.1903
2.2897
2.41968
1.71451
2.74043
2.969
1.49271
2.48068
3.1524
3.83635
2.62602
3.62384
2.83326
3.25647
2.96637
2.0264
3.05086
1.45461
3.32567
3.13422
0.00748253
1.38736
2.46008
2.68312
6.19821
4.63446
4.3514
1.96483
2.49731
2.93249
2.32454
0.0462006
2.38719
2.44587
0.950559
0.640527
0.760112
1.22744
0.526791
0.189195
0.550644
1.87445
1.16689
0.562427
0.227611
0.533769
2.68243
2.13971
0.229935
4.87925
0.726346
4.34673
4.10762
0.677895
2.85706
0.436312
0.483884
0.23863
0.58654
0.0953161
0.905218
0.160356
0.331332
1.80739
0.30913
0.347684
1.47887
0.60489
0.608574
0.167301
0.201598
0.649676
0.741054
1.00094
0.725607
0.385593
0.472063
0.155324
0.0817128
0.106417
0.179615
0.171673
1.46493
0.264032
0.340057
1.27469
0.225241
0.35753
0.264236
0.203566
0.955741
1.20243
0.236142
0.195629
0.179123
0.0222477
0.345585
0.109682
0.168391
0.185105
1.34992
0.537611
1.88918
1.23248
3.22859
4.13821
3.63142
6.61212
8.40637
0.80829
2.49957
1.84518
2.82731
4.8082
0.390944
0.235981
1.36031
1.41769
1.69293
1.04748
0.175819
0.208774
0.352269
1.12485
0.536416
0.420452
3.74945
2.40427
2.93224
4.89633
2.13901
2.46087
0.291853
2.03217
2.17614
2.24712
18.7821
1.20399
22.666
0.491261
17.2942
17.3106
0.233853
30.9779
2.00619
1.77694
4.28377
4.98524
4.28893
1.89017
3.61696
4.45035
2.13891
3.12982
11.2434
1.70124
0.435002
0.655517
2.11833
0.53603
1.94183
1.27518
2.47083
2.98772
0.807242
1.37183
2.26434
4.45093
1.956
1.47832
1.82165
2.59465
1.55039
1.46783
2.19939
1.94111
2.94476
2.00492
0.801232
1.55164
1.56279
0.238121
0.0511926
0.766839
1.06841
0.566868
0.629214
1.50966
2.05666
1.48163
1.21776
1.46684
1.01129
1.6287
1.63115
10.4554
0.34225
0.504116
0.220593
0.437731
1.08978
1.61009
10.3282
5.54323
2.68664
2.69921
0.672687
1.34533
2.72787
3.43571
0.728077
0.552268
1.06974
0.754441
3.16885
5.22143
3.47208
3.56566
1.70821
1.73616
0.823468
4.7
0.787916
1.50464
0.997672
0.11864
0.771456
1.42894
1.26432
1.8837
1.91397
1.5852
3.54869
11.6871
1.46389
1.30696
0.931201
2.52491
3.71204
7.77651
3.04439
4.21008
2.88833
0.919973
0.963912
0.282884
1.74
1.50186
1.85083
3.53059
0.824653
0.693256
0.85654
0.678677
0.428497
0.4076
4.58182
1.54599
0.694928
1.39519
0.163679
1.32367
1.94168
0.656547
5.98647
1.80155
2.62849
1.02534
0.144265
0.394206
0.602579
2.66059
3.27232
3.74979
4.59675
4.87297
2.63763
2.73175
3.63206
1.89731
7.03118
2.042
6.27812
4.20075
0.866815
2.63616
3.27264
5.2673
1.3062
0.17977
3.10891
1.61726
0.591015
0.936882
1.09549
2.46624
0.449683
0.622498
1.21998
0.419759
0.392434
0.496443
0.231614
0.171136
0.249357
0.23954
0.264924
0.835889
0.466582
0.462814
0.46039
0.159226
0.456702
0.530503
0.856381
0.636685
0.867735
1.42291
2.88976
2.33375
4.16778
3.00993
2.38366
2.97848
4.33056
1.95381
3.29171
5.50922
3.05677
1.772
3.06573
1.08351
0.135678
0.339355
0.297016
0.103856
0.249975
0.31788
0.325091
0.593043
0.813598
4.64014
0.718935
1.80845
0.982451
2.21874
2.56408
1.30255
1.99328
3.36903
1.55215
0.698969
5.43228
3.47929
1.0177
0.443984
0.11519
0.0284505
0.230199
0.0536002
0.0828247
0.275028
0.0347369
0.0386719
0.150594
0.81169
1.81742
2.18333
1.33329
0.97958
2.25269
1.62233
0.257367
0.558411
0.292635
0.11556
0.0113604
0.113609
0.178138
0.148849
0.183656
0.0309671
0.187963
0.0336173
0.01864
0.0227995
1.05473
0.607028
1.46265
2.55243
1.58976
2.17129
3.21787
1.09277
0.877998
0.097883
0.165581
0.182483
0.104501
0.111096
0.240896
0.120047
0.1143
0.145422
0.153399
0.01737
0.464476
0.0786017
0.0346328
0.0688323
0.107949
0.269844
0.51174
0.156259
0.277434
0.24234
0.121306
0.126725
0.0891519
0.10954
0.282012
0.456711
1.4735
0.200805
1.29704
2.05058
1.72976
1.80221
5.20702
2.33337
0.796157
0.475889
0.475559
3.10714
0.898652
0.699938
0.257778
0.455099
0.202744
0.0782343
0.0883989
0.566493
1.16496
0.87691
2.21237
3.43686
3.41901
3.05325
0.342646
0.910382
0.944649
0.294597
0.393263
1.40292
0.522679
0.161666
0.585232
0.929151
0.673213
0.523437
0.181503
0.307142
0.0882943
0.397121
0.12102
0.333519
0.12738
1.81463
0.104806
0.0644686
0.680529
0.109753
0.0350909
0.314817
0.0829852
0.0924361
0.062314
1.05531
0.316029
0.491592
0.407298
0.307651
0.681956
1.34794
2.27636
0.947989
0.0358333
0.0721561
0.451313
2.83072
2.71219
1.70842
0.177937
0.966225
0.52139
2.72914
0.0717714
0.196776
0.148154
0.0878958
1.07031
1.6746
1.27239
2.09051
1.85645
1.93481
2.56507
1.57857
5.46442
2.26051
1.84421
2.57928
2.46951
3.17079
2.31057
0.772019
3.04735
1.9457
1.27588
1.37191
3.66961
5.05791
3.80156
4.78478
5.0198
4.1224
1.04011
3.28945
2.67207
5.0585
3.23569
4.08109
5.35502
1.22936
6.02462
4.77386
4.6301
1.2251
6.20197
0.989422
0.176036
0.152424
8.98134
0.379857
1.96887
1.47626
1.35956
0.898295
0.250143
0.628295
0.236164
0.446242
0.731881
2.36267
1.60502
0.805833
0.420266
10.4295
2.63564
0.25346
0.875481
0.587579
0.269477
0.356554
4.63843
1.46239
0.806455
0.889731
2.88131
3.83914
5.66097
5.81705
3.32037
3.84605
4.3095
8.61911
2.55032
6.80524
5.54204
4.05015
6.9424
1.43799
1.17109
0.742979
2.62859
0.871272
9.15504
0.870179
2.09693
3.64678
2.58109
1.66469
1.80567
2.6089
0.558384
0.761384
0.201549
0.707107
0.175682
0.429487
0.104729
0.112638
0.248585
0.321032
1.88577
3.18723
3.775
3.40028
8.15104
5.61483
6.70356
6.25301
0.947984
0.52539
1.01799
4.6924
2.06558
1.76942
2.40547
5.14114
8.50121
5.69043
2.68169
1.34884
2.70407
0.193806
4.75203
1.58346
2.3422
0.951649
0.927384
2.08507
1.27651
24.8443
1.94386
2.16515
3.72068
3.09053
1.14788
2.05946
0.470248
1.47964
0.465278
1.27072
2.6638
4.59701
5.82094
3.15645
5.25323
7.08384
1.82389
2.53633
6.46005
0.70618
0.304966
2.97148
0.360841
0.39526
0.592509
2.86125
0.176817
0.603757
0.450436
0.508927
1.81249
5.42996
2.19884
2.66338
1.2598
1.78014
0.421656
1.15525
0.853927
0.590017
1.04141
5.9132
5.81984
0.800678
1.65961
1.02586
1.31374
1.94108
1.38046
0.333455
0.366196
0.517368
0.195845
0.0857612
0.142999
0.0764087
0.120985
0.069878
0.109037
0.154169
0.167728
0.523681
0.505598
0.565548
0.464662
0.360526
0.23768
0.667333
0.217932
0.38839
0.465705
0.793126
0.234286
0.513838
0.31919
0.451106
0.256314
0.184052
0.76476
1.67986
1.93753
3.45597
3.3124
2.43906
1.98302
1.59882
0.440131
0.171577
0.375889
0.61901
1.34958
0.341969
1.49187
1.68455
2.73541
3.35926
1.36596
1.34937
4.85482
6.01779
4.16033
4.40604
5.3001
2.79953
4.02573
3.90444
2.79871
4.46823
7.47027
4.46861
4.64714
4.23793
3.58373
5.84545
1.96262
3.83969
2.76488
2.61562
1.16793
3.4132
1.27708
1.21543
0.372373
0.234494
0.526035
1.13931
2.73915
2.38294
1.78736
1.70787
1.4963
4.10411
1.30054
0.538309
0.293299
0.302035
0.73034
0.302349
0.37312
0.340995
0.728433
0.244616
0.463002
0.490443
0.488376
0.508406
0.342693
0.285491
0.374739
0.192126
0.695098
0.210781
0.641286
5.23075
0.461348
4.42638
0.0958519
0.202184
0.350223
0.142217
0.380981
0.0541303
0.330114
0.11863
0.0518428
0.214517
0.411828
0.307205
0.502861
0.502163
5.04507
0.139801
0.136682
0.379213
0.530411
1.4988
0.189992
0.155404
0.0486108
0.179093
0.0913872
0.254515
0.183545
0.17413
0.283311
4.38162
0.247999
1.43678
0.225438
1.27087
4.30232
0.240212
0.149066
0.950797
0.168906
4.45314
0.193464
4.43931
0.00845091
5.19366
4.51159
0.154008
0.237201
0.272994
4.44125
0.124328
4.92442
0.0676082
0.557342
4.25819
4.57721
4.50325
0.102632
4.2063
4.90132
0.14513
4.29926
4.94636
4.81135
0.344453
4.38925
4.22647
0.738522
6.25865
2.30269
2.47818
2.96548
2.51086
1.16343
0.758156
0.396138
1.32486
2.00851
1.47738
3.40952
5.39234
3.3133
4.59431
1.56066
4.19616
1.26544
1.21496
4.23684
2.37585
1.40235
1.97037
3.36499
5.45162
0.953948
0.513759
0.745892
7.64949
0.534701
0.734732
0.193497
0.276215
0.528514
0.0326956
0.580982
2.05179
0.604814
0.148644
0.0876566
1.25841
0.282717
1.56768
0.751643
0.62962
1.30298
1.12285
1.06011
2.26779
3.40916
0.790585
2.39045
0.366386
0.396733
0.488031
0.234423
0.21678
0.246896
0.788559
1.61273
3.69974
0.0964644
3.29014
0.388465
1.0207
2.68272
5.22361
1.78621
1.49963
1.45734
0.81313
0.523187
1.53416
6.09043
6.78248
2.89779
2.35055
5.88331
6.96417
5.56769
3.62159
5.67988
3.03073
2.15389
2.89342
2.10958
2.0161
14.4081
0.627844
0.645052
0.71923
1.18626
0.678368
0.955645
3.68433
0.490237
0.168567
0.242045
0.174564
0.151068
3.27256
0.958267
2.27143
1.07801
3.27127
1.85162
3.57444
0.435478
1.18954
0.18067
0.373536
0.410232
0.472843
0.145008
0.19271
0.257171
0.360905
0.964767
0.391505
0.764432
0.683076
1.66409
0.920949
0.328682
1.61548
1.31118
2.6593
5.88758
9.31083
4.07951
6.24889
3.43137
2.02675
1.39315
3.12085
0.244319
1.8987
0.685339
0.731754
1.56854
0.333997
0.110112
0.291097
0.113614
0.551326
0.186248
0.161418
0.217367
0.0380284
0.157174
0.382401
0.1898
0.445296
0.392684
0.343441
0.348606
0.0478756
1.9181
0.854509
0.861953
0.690701
3.81375
0.696291
0.53574
3.35009
1.04502
1.40114
5.74118
0.270338
0.868012
0.330267
0.597089
0.102552
0.112117
0.119208
0.497653
0.147994
0.490894
0.467629
0.600976
0.458957
1.61875
3.55213
3.60992
1.68915
2.57506
2.65368
0.906239
1.80008
0.523525
1.33576
1.03944
0.127426
1.40676
0.773663
1.44678
1.1622
3.3757
3.73187
1.75462
5.24203
3.80529
1.0326
1.89652
2.4634
1.92833
4.52248
0.769058
0.591112
0.710012
0.123475
0.293681
0.453477
0.140561
0.413523
0.228239
1.05165
0.46345
1.17789
0.302923
0.135639
0.349138
1.34619
1.00756
0.570886
1.4714
3.9011
4.24503
1.27228
1.91672
0.626576
0.298401
0.901473
1.06209
0.402535
3.72718
0.394881
0.474665
1.5886
3.31371
0.318564
0.228923
1.47052
1.54995
4.45136
1.71496
3.30276
7.90438
0.232919
1.14377
2.81528
2.60875
2.56029
11.6102
0.531439
0.786734
0.179094
0.0993251
0.383831
2.29028
4.44731
0.730821
1.25054
1.4942
0.357123
0.898501
12.7124
0.289656
0.338442
12.5469
1.78763
0.90532
0.265634
0.202994
0.782757
0.282118
0.064624
0.162179
0.566147
0.422469
0.893593
0.353901
1.12971
12.2842
0.521028
0.628805
1.02478
10.1963
1.02541
2.82271
8.35314
5.26173
1.78424
1.93928
4.54565
5.58527
1.53636
0.176555
2.42121
1.07772
0.597149
2.04473
0.276804
0.728037
1.87881
4.36412
2.32544
3.38667
3.97364
4.88779
5.66934
1.41609
2.8086
0.870907
0.278552
2.47558
3.55248
2.64399
0.20702
0.802511
0.38039
0.355521
1.31129
0.802626
2.02605
3.23485
3.59848
2.19068
6.76038
3.85843
5.81367
0.830989
0.978336
2.53176
0.270929
4.55961
4.22763
1.3096
0.0904118
0.119882
0.426937
1.30208
0.78464
0.108718
0.258199
0.35175
1.09554
6.19378
5.28415
1.42541
0.187326
3.1938
1.92426
2.66677
1.47726
2.15609
0.518067
2.0168
0.204273
0.773861
3.73843
0.708145
2.23473
2.9324
0.656752
0.434379
0.201512
0.120471
1.76456
0.481424
3.14073
0.448475
0.722147
3.06918
1.12742
1.17888
1.62618
1.18564
3.66184
0.23127
1.57839
3.43077
3.85602
2.81877
4.93857
3.50338
2.4174
2.27954
1.11815
1.88464
2.75011
1.459
0.96947
1.60107
2.00385
3.43561
6.31844
5.51679
5.52032
4.26062
2.31749
4.51853
1.46684
0.98165
2.88921
4.0031
6.21193
5.21188
7.35251
0.41834
0.608126
0.539223
2.26763
1.22146
0.587252
5.63672
4.61247
1.86198
2.3746
1.87374
1.03322
3.03502
2.13918
2.12283
0.95545
0.453349
1.26206
1.49141
2.89672
1.99343
0.27459
1.00098
0.719916
0.783566
0.360915
0.053713
0.065779
0.758946
0.465883
0.0310283
0.266308
0.951408
0.528173
2.32957
2.66211
2.76684
3.75452
2.07505
7.00972
3.88935
5.68678
3.00597
1.48765
0.38539
1.60392
4.14885
4.23231
0.930307
5.10018
4.17583
4.44851
6.67005
0.909195
6.04278
1.70542
3.8663
1.71242
3.43698
1.0529
3.28401
3.04046
3.58904
1.39934
4.65772
1.33159
3.77062
1.31628
0.905132
1.89832
2.17938
3.20051
0.716744
3.85236
2.61244
0.856067
2.00889
2.92555
1.51759
3.49763
4.1513
10.6862
11.4701
2.47528
5.55058
5.58368
6.713
4.15632
2.48247
3.98609
3.2719
4.79126
3.67781
7.61552
3.77549
2.98746
3.93676
0.963889
2.24431
6.4261
1.48179
0.924786
1.99977
0.605659
2.97017
1.50796
0.339659
0.587955
0.200695
0.321003
0.776908
0.469708
0.233405
0.402272
0.298172
0.446415
0.0822008
0.466559
12.7492
0.516249
0.893225
0.959123
1.21069
0.25445
2.4012
4.16018
1.50775
1.874
3.49468
5.10868
5.49806
7.51015
2.56987
4.41687
4.505
2.06195
8.34809
5.5447
6.41582
4.0624
5.02999
7.20217
4.14754
1.15213
1.3521
3.55764
12.6017
6.14459
1.94497
1.77238
1.60147
2.38004
1.88643
1.11751
0.759784
2.29945
0.846527
1.89188
2.99099
5.08313
2.49815
6.25004
3.49699
3.58453
1.53086
4.28996
4.24815
4.67537
10.9091
6.56043
8.30035
7.86312
6.85405
7.22096
1.6209
3.21065
1.79377
1.12157
0.348408
3.40455
0.311801
0.269328
3.42722
3.37855
1.91645
0.217733
2.00526
0.125683
2.34234
1.33652
3.01034
0.753953
0.793327
0.655141
2.27703
0.362461
2.95297
3.7006
2.18557
2.72798
1.57238
0.563974
2.30278
3.88278
4.45823
1.74121
7.59939
4.21009
6.93732
6.68547
4.55225
1.46715
5.20683
3.34403
3.0787
1.80475
3.30188
0.605723
0.682206
1.94829
1.5254
1.66064
0.637652
1.21149
1.08437
0.160864
[truncated: 10,012 more rows]

## Sheet: Mouse 3_Velocity
0
1.71052
1.03803
0.944552
0.65294
0.635185
0.169747
0.367991
0.239044
0.622173
1.04276
2.87301
2.51683
2.72556
1.96793
1.50186
0.603452
0.451215
0.758135
0.995358
0.0867153
2.02826
1.3485
1.23093
1.2053
0.156392
0.373139
0.317069
0.127286
0.304325
0.0898928
0.156044
0.687414
1.01844
3.03561
0.767661
1.74851
2.08284
0.943997
0.423766
4.66393
4.63299
2.06087
0.891347
1.3691
0.501271
0.609532
0.773427
0.293944
0.61429
2.5182
2.79104
2.76222
3.35698
1.08769
1.45201
2.03805
3.52024
1.89402
0.445209
1.89441
0.298249
0.676956
1.44898
2.86426
3.50321
2.6807
3.67569
3.739
4.25776
3.2909
3.58906
1.17163
0.945462
0.971943
0.628688
1.51293
2.31442
3.06824
2.58646
5.0394
3.70254
4.33531
4.23779
4.59681
3.31454
1.80896
0.7384
0.336296
0.797833
0.334134
0.534452
0.941232
0.744955
1.02316
2.191
4.38289
0.107823
2.43691
3.00472
3.77894
2.84775
1.52921
2.71673
1.93958
2.27001
1.28068
2.38412
2.1681
1.68553
0.563688
0.974514
1.52777
1.37832
3.16222
3.10191
1.13672
1.77037
2.22418
2.70457
1.28389
0.917531
2.76125
4.0993
4.62445
1.11103
0.61411
0.147442
0.228094
0.198047
0.0833699
0.134039
0.137842
0.142902
0.148405
0.0572292
0.0709529
0.175741
0.110343
0.0474657
1.0761
0.58549
0.935034
0.943473
1.40818
1.8774
3.48596
1.4694
1.21695
1.83167
4.45481
6.30009
1.98255
2.18997
1.22166
0.485861
2.23377
0.114647
0.29731
1.16224
1.06398
0.0655892
0.354556
0.411205
0.388016
0.209548
0.93391
0.864101
0.104798
1.08352
0.587675
0.854567
0.603314
2.05436
2.53571
2.1569
18.6563
0.540437
1.19439
2.37936
0.488559
0.954818
0.63527
1.95634
1.67608
1.91993
3.63543
4.25183
3.69815
6.84463
4.3421
3.1144
3.62607
3.7551
3.24866
4.30035
3.14584
4.37873
3.58057
1.64485
0.866738
1.45149
0.963134
0.882998
0.461503
0.189995
0.379708
0.339259
0.17877
1.21879
2.79774
3.04788
3.5445
2.86234
2.85031
3.88894
7.15372
3.76698
4.80788
7.3612
5.539
2.77498
2.69488
3.576
3.04187
1.5963
3.07921
4.12569
4.92958
4.90903
3.89873
4.08323
4.81966
3.68159
3.16999
3.82724
3.00463
1.99899
1.12203
0.35985
0.201304
0.142392
0.422191
0.870363
0.60702
0.358807
0.476253
0.284708
0.421716
1.08075
1.0276
0.360605
0.224026
0.438486
1.06023
0.717609
3.09324
2.97552
2.17863
0.4195
0.420116
0.533348
0.167214
0.564339
1.90814
2.98208
3.24275
2.28024
1.32065
2.24633
2.5283
3.6606
2.73295
3.85869
2.83703
2.53788
3.4023
3.70107
3.28294
0.815087
1.83594
0.80495
0.379716
0.321775
1.28067
0.285717
1.26753
2.60541
3.23879
3.41592
5.79476
3.42994
3.49757
2.80454
2.3145
5.28242
5.05968
5.95168
3.03341
2.6951
5.78557
3.28531
4.45029
2.63261
6.02606
4.00211
3.38505
1.43791
2.14158
0.7051
0.321903
1.23181
0.655615
0.543273
1.05326
21.542
0.708745
0.884652
0.865293
0.972502
1.302
0.462764
0.553676
1.13507
2.00276
3.69411
5.30942
5.65426
4.40769
2.84155
5.79484
3.93924
4.3099
7.97195
4.48481
5.88022
7.48452
3.47322
5.11773
4.38029
5.55121
3.61235
5.1463
4.01574
2.44122
3.007
3.98361
4.94772
5.69301
4.26321
1.9382
1.84339
1.57841
0.853539
0.896428
1.0309
1.73877
1.98354
2.25409
2.29161
2.62031
2.98013
5.00116
2.96421
2.83585
4.01029
4.63296
4.70699
1.89636
1.3755
3.34588
3.04559
1.81957
0.647972
1.7421
0.900631
0.686572
1.7197
1.12362
3.57391
2.69673
3.68298
4.86214
4.30566
1.4824
0.202043
0.681902
3.68287
3.05932
5.56633
3.70096
3.30611
1.60916
1.83612
0.944098
3.26537
4.4731
3.57815
3.98111
3.86756
1.74493
1.83809
0.61834
0.274157
0.379653
0.64207
0.675615
0.110658
0.0604261
0.094474
0.19572
0.696891
0.968512
0.342522
1.00364
1.04593
1.23434
2.51975
2.20412
3.09495
5.35132
2.33048
0.461298
1.11545
3.11424
5.34585
2.64365
3.43116
2.24552
1.62728
0.74643
1.98104
1.65003
4.87587
1.87436
2.77938
0.927317
1.08441
0.328015
0.818645
0.27277
0.624566
0.324061
0.245183
0.07901
0.238511
0.469464
0.0997483
0.157775
0.184738
0.221998
0.203975
0.131224
0.100565
0.730623
0.608418
0.43249
6.57164
0.998433
2.1368
0.926391
1.36941
0.780094
0.224809
1.36806
0.650074
0.965475
0.192852
0.0678169
0.881612
0.277243
0.428095
0.166027
0.57509
0.98776
0.687128
0.136757
0.193668
3.60404
4.20654
0.339524
1.43218
0.575848
0.557886
0.941217
0.179581
0.400244
0.109508
0.540851
0.344723
3.99287
1.52686
0.960465
0.624658
0.654811
0.150377
1.19799
0.381836
0.59247
1.97069
1.1077
0.231192
1.65101
1.4756
2.41099
0.419859
1.73786
0.20222
0.980874
0.491206
0.0403615
0.543682
2.35967
0.747377
0.817039
2.01801
2.46929
3.11764
7.59767
4.9573
6.09812
6.24969
5.97281
3.34036
2.55607
0.76356
2.41218
0.17758
1.17189
0.369949
0.27964
1.4038
2.10184
1.03481
0.0808722
0.101723
0.71069
0.511808
1.24022
0.0949583
0.0791914
0.0992125
0.342182
0.0593042
0.19782
0.160683
0.329945
0.536289
2.10016
3.15956
3.45725
0.951468
1.37035
5.47943
3.18141
3.57534
2.5111
2.176
1.2468
0.388463
0.28609
0.493882
0.538785
1.83171
0.934747
0.632122
0.374956
0.69118
0.103027
1.31332
0.239925
0.291943
0.265575
0.240799
0.211139
0.158809
0.0594474
0.169126
0.126161
0.0911706
0.373549
0.10677
0.621145
0.519549
0.282829
0.831476
0.642493
0.404987
0.114011
0.169261
1.38105
0.193635
0.831839
1.12085
1.01268
3.68244
4.92107
4.08678
3.61184
3.08671
3.14671
3.2369
3.84544
2.67606
1.60443
0.629746
0.617884
1.21828
0.553159
0.544051
0.339767
0.437542
0.142184
0.718995
0.200851
0.209356
0.177047
0.276091
0.0584458
0.267107
0.21968
0.443495
0.618943
0.794358
0.664373
0.132832
0.472545
0.143467
0.128969
0.037725
0.0176852
0.0877663
0.186514
0.0736892
0.0537764
0.0330643
0.0830298
0.0587732
0.299883
0.315568
0.686224
0.31347
0.485539
0.962923
0.646883
0.720998
0.557816
0.47294
0.761946
0.290456
1.3133
0.496488
3.17695
2.6908
0.681211
0.853368
0.246355
0.625193
0.602961
0.10237
0.233718
0.16871
0.420338
1.54378
2.1322
4.00072
1.82609
1.39144
1.32294
0.49916
0.258541
0.469291
0.672077
0.367844
0.174209
0.178765
0.543934
0.343015
0.444423
1.43227
2.63568
2.8949
3.9817
1.64136
3.3369
1.7159
0.847869
0.9859
0.163127
1.2382
0.0642647
0.0950523
0.538578
0.496
0.115217
0.618491
0.877454
0.327475
1.29544
0.526569
1.54383
2.42476
2.04238
3.01995
1.21388
2.09653
1.76625
1.23316
1.80105
0.992343
0.488716
0.628967
0.63921
0.480433
0.212292
0.510787
0.265971
0.222958
0.39813
0.219556
0.0930587
0.606868
0.65817
0.483648
0.193116
0.320529
0.933391
0.154177
0.229673
0.086242
0.130923
0.115074
0.103275
0.0362529
0.115563
0.0537953
0.190891
0.307776
0.0778432
0.323143
0.140165
1.01205
2.83634
3.38253
2.95394
1.83083
3.18104
1.68592
2.17358
1.6655
0.327691
1.96272
2.18629
1.63833
0.234639
1.03813
0.203199
0.81834
0.346931
0.699729
0.152849
1.43692
2.22847
4.11717
1.91886
0.459077
0.542668
0.609006
1.57716
0.566832
0.369139
0.646518
0.219064
0.455889
0.660502
0.352375
0.409012
1.23599
0
0
4.09249
2.43239
3.01098
3.73737
0.164235
0.65657
0.458244
1.7288
0.53257
0.741515
0.0744986
0.517314
1.02403
0.336253
0.638643
1.27527
1.77015
0.234792
27.9222
1.2264
1.17278
5.61614
1.19366
0.856617
0.822104
0.548753
0.671973
0.209544
0.261839
0.229256
0.0685293
0.458391
0.0784683
0.0804883
0.382733
5.51128
0.245896
0.490591
0.125313
1.60058
0.474219
0.332589
0.688767
0.21204
0.212824
0.128023
0.245392
0.169521
0.346494
0.600392
0.186696
0.103404
0.365879
0.175357
0.401049
0.661548
0.488578
0.108002
0.247752
0.215863
0.300898
1.25856
0.268031
0.828792
0.816993
0.572042
0.482281
1.07834
0.263775
2.6922
0.47534
0.739091
0.256531
0.30634
3.52155
2.19676
2.19401
1.09709
1.36993
4.52691
2.90806
3.55502
4.15684
1.069
0.957932
1.81327
0.373332
1.04959
1.04407
0.629185
0.260164
0.0748888
0.190762
0.623627
0.412278
0.153636
0.737157
1.30061
1.7118
3.25763
1.29759
2.70865
2.56749
3.35375
2.68576
1.00899
0.415619
0.445786
1.35859
2.16924
2.3854
1.10196
0.729891
0.28649
0.587717
0.523664
0.477409
0.612996
0.130821
0.15133
0.332194
0.701813
0.97976
1.04903
0.157226
0.0644474
0.0662363
1.01501
0.113312
0.202222
1.14982
0.228395
0.189873
1.98238
0.98004
0.299678
0.330021
0.357603
0.57668
1.6007
0.527221
1.24648
1.00044
0.346659
0.570264
3.23035
4.45368
3.29294
1.85217
3.8063
1.88457
1.74373
2.22634
3.18254
2.43189
0.44173
1.19268
0.410121
0.302338
0.882723
1.5335
0.763936
0.314659
1.33346
1.07368
0.964393
0.539115
1.55873
2.22499
2.2305
3.74228
2.60574
2.53675
1.81192
2.1491
1.80059
1.25478
2.34512
2.46869
3.73964
1.86164
1.24187
0.82981
1.2523
0.408313
1.9473
1.1173
1.07104
1.31316
0.941338
0.962352
2.47429
0.835893
0.158114
0.076858
0.173308
0.0815831
0.0913326
0.0380808
0.0999414
0.109245
0.131456
0.0465269
0.0708698
0.0967677
0.6028
0.774106
0.633822
0.417603
0.794222
0.0465228
0.352774
0.161407
0.286169
0.189367
0.493492
0.391363
0.097673
1.15531
0.692814
1.02096
0.311211
0.782298
0.282865
0.0889227
0.182189
0.652277
0.855612
0.198692
0.0980613
0.422331
0.456533
0.094349
0.20815
1.59737
1.13798
0.241976
0.0356436
0.0937156
0.047306
0.0482677
0.0778272
0.253326
0.444781
0.396371
0.85325
0.73717
0.398588
0.288521
0.423651
0.22479
0.0809565
0.171523
0.041579
0.0714639
0.0126404
0.0115043
0.0536954
0.0560659
0.0920272
0.00417342
0.0620851
0.356296
1.23429
1.01864
0.510078
0.542337
0.794194
2.05634
3.48005
4.34903
5.32188
2.88856
0.956541
1.09554
0.465136
0.601006
0.660394
0.226571
0.287984
0.328456
0.857118
0.0588447
0.445326
0.0787615
0.0650547
1.26977
0.228377
0.0809346
0.0687858
0.788655
0.152218
0.215128
0.33211
0.0692838
0.190187
1.15046
1.02062
0.689868
2.13843
0.504369
0.452812
0.16125
0.0767687
0.995394
1.66661
1.43767
3.67687
2.24545
2.91425
3.66653
1.47815
1.40496
4.00472
4.92032
6.94194
2.15218
3.17308
2.42442
2.16124
0.929244
0.605826
0.687909
0.536594
0.471237
4.04437
4.95671
3.62906
1.53418
1.0647
1.3215
0.975991
0.973593
1.44686
1.61869
0.12532
0.22309
0.132933
0.460127
0.903815
1.56231
2.41118
1.75419
0.255007
1.44961
1.2986
0.0970357
0.664234
0.802997
0.866764
1.40745
0.153453
2.61963
1.1295
0.620839
1.29611
1.44818
1.83817
0.979812
0.274555
0.387222
0.4977
1.04026
1.04815
0.183338
0.17323
2.52036
0.562311
0.920729
0.691571
0.792016
2.82968
1.58902
1.69714
0.0765672
2.892
1.39052
3.13397
3.55862
4.06928
2.48317
2.92071
1.16006
0.974726
1.10051
0.0692919
0.242203
1.18088
3.67576
0.932077
0.797587
0.63046
0.968156
2.87897
1.89118
2.11197
3.0276
2.99209
2.45642
0.831483
3.78068
1.30209
1.54201
1.45425
2.37387
1.0989
1.02793
2.01258
1.07817
2.02627
2.61004
2.06932
0.290023
3.55391
1.08182
0.914289
0.688037
1.19249
0.3973
0.137917
0.059532
0.192268
0.1025
0.0760341
0.071337
0.341291
0.190642
0.1185
0.109853
0.0552415
0.0317717
0.437359
0.0574867
0.144232
1.19427
0.412538
2.57638
4.01927
0.735501
0.196568
0.35341
2.15507
1.36513
1.04869
0.686911
1.26978
1.64648
3.81461
2.95023
1.78685
1.26572
0.605922
1.1345
1.39064
0.670026
15.9232
0.94628
0.241521
0.371819
0
0.0537232
0.154213
0
0
0.0525519
0.0825871
0
0
0
0
0
0
0
0
0
0.204021
0
0.211007
0.199742
14.7176
0.157301
0.168294
0.0130919
0.383292
0.0442303
0.0615436
0.227634
0.0869231
0.0668794
0.18465
0.299367
0.277516
0.0390492
0
14.5451
0
0.0554423
0
0.0433191
0.0500316
0.0552674
0
0.0517649
0.127726
0.0702058
0.0294315
0.0284107
0.101
0.212624
0.16883
0.715879
0.192428
0.551977
1.26326
0.180642
0.256332
0.142872
0.584434
0.402451
0.766808
0.588511
0.170696
0.341368
0.128942
0.636427
0.627297
1.75575
0.165732
1.20649
6.29039
0.5868
1.23494
0.138332
0.051634
0.10694
0.162741
0.134193
0.205001
0.236823
0.355322
0.433606
0.283524
0.0347345
0.058551
1.19877
0.998814
0.336358
0.567499
0.908511
0.835124
0.413316
0.509568
23.7216
2.81328
1.46692
3.1441
3.45347
2.01677
3.74
3.04148
3.54506
1.85825
2.33719
2.40447
0.488088
0.304888
0.274632
0.151848
0.309812
0.265319
0.895665
0.117246
0.291487
0.636368
0.449272
0.326369
0.284787
0.302038
0.248736
0.419994
0.0730399
1.07013
1.07011
1.63589
0.554751
0.508347
2.26074
4.16627
3.0586
4.50954
6.04579
3.23257
5.07768
4.69723
3.22796
2.95091
3.8333
4.87972
3.95396
2.7445
6.01826
4.84332
4.91698
2.92275
3.40704
2.06852
1.4131
0.422253
0.811173
0.373735
0.906091
2.6879
2.27382
1.37085
3.29766
3.27834
3.81936
2.5935
1.33354
0.503414
0.440654
1.33276
1.92953
1.39535
0.401256
1.50486
2.62204
5.13154
2.0161
4.4759
5.02273
1.82287
0.2384
0.595993
2.01602
2.88895
4.86225
1.84474
2.92448
4.02304
3.08404
1.2597
2.87327
2.81771
3.10865
2.59018
1.21911
3.28955
4.18016
3.20245
3.18353
3.1324
1.38279
0.13422
0.957004
0.927411
0.187935
0.313737
0.429186
0.266773
0.38916
0.148133
0.194274
0.249581
0.196006
0.20706
0.417267
0.744122
0.348543
0.146698
0.11173
0.117387
0.0347369
0.0987375
0.0119324
0.0512192
0.140118
0.0340833
0.736067
0.611227
0.283037
0.796579
0.748193
0.876696
0.455554
0.575882
0.472349
1.25606
0.69992
0.402747
0.360956
0.129311
0.860072
1.05037
0.690993
2.63377
2.89116
3.00796
4.43395
4.14518
2.45785
3.89673
4.29402
3.31055
3.86894
2.85133
3.04146
3.67483
2.19545
3.46622
3.25406
3.15482
3.74989
3.08743
3.76543
3.89034
4.60336
4.37848
6.32425
2.69033
4.76198
5.75273
3.11261
0.519131
1.41157
0.258314
0.156389
0.474446
1.51554
2.78225
2.17714
4.60389
4.25052
0.952573
1.59099
4.77128
4.40087
4.87357
4.21586
2.70371
4.51119
3.71098
5.84907
1.79694
1.3683
2.38938
1.91093
0
1.96735
1.60938
1.84826
3.27802
3.6811
2.44943
3.2332
2.79781
2.46474
1.61459
1.60107
1.90346
0.211131
0.268906
0.588537
0.515126
1.68706
0.510477
1.02611
0.840226
0.924308
1.10885
0.780009
0.0351583
0.284521
1.05511
0.123861
0.0857312
0.552449
0.113493
0.947579
1.3108
0.465518
0.0693312
0.334939
0.379796
0.147594
0.221984
0.355698
0.0891535
0.158072
0.604293
1.40941
0.900493
1.55442
3.4137
2.37283
0.447896
0.33475
0.306779
0.379415
0.901217
0.111347
0.17561
0.570617
0.487628
0.185888
0.195828
0.0902442
0.181784
0.137134
0.104132
0.0822396
0.292512
0.453032
0.558696
0.748699
0.746744
4.4459
3.45639
2.67927
4.66042
3.01672
2.66359
2.65639
3.12622
19.4596
0.190348
0.632569
26.4492
5.13073
5.12981
3.33523
4.89209
3.55092
4.73911
4.69147
3.29143
0.940168
1.28761
1.39531
0.979086
0.220759
0.435821
0.11537
0.628579
0.724351
1.90924
0.620983
2.59167
3.58131
1.91029
2.18165
2.0493
1.07698
0.303912
0.796281
0.489237
0.0463875
0.821461
0.0697318
0.0866378
0.377442
2.75596
2.21737
1.44984
1.31809
1.15392
0.341764
0.312012
0.495132
0.395397
0.259148
0.562812
0.232928
1.21933
2.20973
1.49096
5.39309
3.94966
4.41913
2.08459
1.26565
2.22128
5.12384
4.07389
1.84993
1.12734
0.551486
0.304966
0.411389
0.270616
0.359297
0.727377
1.17809
1.35813
0.469329
0.65271
1.01137
0.922776
1.32207
1.74816
0.504704
1.06568
0.460896
1.06733
1.31934
0.899776
0.941144
1.40381
1.14085
2.01133
3.04417
3.55862
2.40205
1.6399
1.65027
0.920584
0.988658
0.793206
0.562478
0.274741
0.424081
0.099115
0.123848
0.0716322
0.0565279
0.0854165
0.095301
0.271849
0.0282146
0.647707
1.4994
1.11762
1.04859
0.477442
0.442663
0.0896644
1.26474
0.186437
0.76914
0.223577
0.057227
0.0617451
0.0917382
0.0669909
0.0953536
0.118472
0.0503055
0.0483632
0.227894
0.309801
1.32154
1.85131
3.50097
3.16832
3.74728
4.51595
3.53636
3.15412
0.602486
0.496573
0.964405
0.591078
1.23695
0.528702
1.32495
2.03222
1.87871
2.75141
4.26782
4.01651
4.45275
5.4012
5.65991
3.84066
2.84202
4.92276
2.70084
3.50209
2.02938
4.2132
4.47488
4.55012
1.78416
1.11825
1.15263
0.203974
0.917794
1.12093
2.1297
0.571789
0.946587
0.838627
0.734469
0.0556598
1.41863
2.58687
2.52922
5.07312
4.86946
3.55905
3.51984
3.45909
2.64693
3.78467
4.31245
3.28839
1.3798
1.268
0.941181
0.585583
0.771324
0.113728
0.404326
1.35604
1.05687
1.2656
0.612885
0.439333
0.263475
0.591081
1.56729
2.72776
2.78175
2.63144
2.42981
2.51621
1.39607
0.889588
0.401673
0.537348
0.819701
3.30559
2.72647
3.23279
4.211
4.28742
4.10254
4.1075
5.23291
3.78206
3.86198
6.73354
4.24087
4.58236
4.34076
5.87785
2.2035
2.64128
2.23005
1.38871
1.14032
1.13033
0.7972
0.678755
0.788732
0.97621
0.160952
0.841584
0.357534
0.825616
0.238746
0.538308
0.698803
0.507528
0.355834
0.622654
0.698315
0.94357
1.63048
1.69207
4.23032
2.647
0.651972
0.634634
0.376995
0.475655
1.286
0.731329
0.40997
0.127881
0.162742
0.1367
0.171708
0.102144
0.0745603
0.193648
0.152096
0.320074
0.7523
0.422399
0.27527
0.667273
1.59685
2.5797
3.62789
1.43851
3.4249
4.68424
4.23839
3.53581
2.04355
0.679976
1.34729
0.261849
2.7917
3.30164
2.02631
2.89483
6.09295
5.15867
6.89576
2.14193
3.5542
6.61262
2.9442
3.04612
4.20968
5.15859
7.39189
4.11787
1.36066
1.03027
0.0644469
0.382068
0.655405
1.17615
4.2324
3.78019
3.55565
1.68808
1.4523
0.779273
0.324108
0.196735
0.300213
0.635817
0.244445
0.402149
0.596796
0.0340004
0.0987544
0.476924
0.196538
0.0659729
1.23125
0.22624
0.122811
1.34277
1.21005
0.855894
0.900358
1.46844
0.772168
0.360919
0.388407
0.573905
1.41123
0.636918
1.12363
0.319956
0.761539
0.836335
0.590404
0.720051
0.877149
0.992264
0.217101
0.372203
2.57073
3.28242
2.9941
1.06519
0.213563
0.374617
0.102456
0.0390089
0.110529
0.0438359
0.0190023
0.0776464
0.0372156
0.139098
0.0575648
0.0320279
0.338386
0.662913
0.432748
0.141994
0.128595
0.101308
0.0825636
0.514349
0.179214
0.120278
0.154277
0.250792
0.35023
0.0746802
0.551204
0.283945
0.799508
0.562543
2.27371
2.40285
2.96281
2.27551
4.83773
4.27182
3.24598
4.34356
0.883511
3.08955
3.27028
2.7548
0.836475
2.06507
1.45982
1.69558
1.77943
0.821501
[truncated: 10,012 more rows]

## Sheet: Mouse 4_Velocity
0
0.0480025
0.330464
0.450522
0.964366
3.60223
2.21992
0.681895
0.385383
0.128543
0.775974
2.16884
1.17376
0.328332
0.51419
0.485945
1.60921
1.95937
0.779148
0.282201
0.529854
0.694949
6.7143
0.903611
0.442531
1.04172
0.918364
0.412023
1.41673
1.87477
3.17101
0.95458
0.650258
1.82837
0.498225
0.551212
0.345951
0.232395
0.645033
1.01291
0.228957
0.0180426
0.343472
0.228299
0.501988
0.347048
1.30531
0.214366
0.331477
0.677579
1.30889
0.465489
0.618338
0.270639
0.0465841
0.641044
0.68399
0.180395
0.137544
1.61235
0.963145
0.536204
0.712633
0.633427
0.886504
0.80031
0.854549
1.89309
2.56033
1.09745
1.49538
0.775754
0.768303
1.17446
1.26471
1.05883
1.07068
1.91563
3.80593
5.44252
5.45195
3.3235
5.14123
4.59647
6.4807
4.31916
6.32
5.51445
3.20399
0.690013
1.00227
0.564996
4.2903
3.78129
3.43514
3.86281
5.07093
3.93923
3.39116
1.18907
0.0614933
0.438077
3.57038
3.53268
3.35784
1.37293
4.74702
3.59247
3.2051
2.53934
2.81519
2.49889
3.15676
0.879333
0.459224
1.12128
0.463238
1.44194
0.793821
0.354013
0.494381
0.555565
0.524085
0.103583
0.0307693
1.55202
2.81953
3.51157
3.46636
4.36814
2.34532
2.9807
3.92124
5.73742
4.02384
2.12635
2.32184
1.13769
1.18824
0.471497
1.773
1.50134
0.810836
0.274232
0.322032
0.552621
0.283431
0.162833
0.142925
0.162941
0.190054
0.376954
0.549745
0.805392
1.81813
1.79605
1.43466
3.01209
1.68599
1.78798
0.112628
0.482334
0.500197
0.409582
2.10528
3.4996
3.19862
0.526515
2.93826
5.21592
5.5343
3.59452
4.55096
1.72012
2.261
4.32782
1.20272
1.23624
2.17687
3.09261
1.27143
0.843125
1.56004
1.57123
3.90252
1.68169
1.91464
2.97651
6.03016
6.58617
7.14718
2.24963
2.59395
3.66017
1.18935
1.27853
0.740583
0.495744
2.69305
3.65503
3.23426
3.91383
1.95429
1.92682
2.7479
4.09365
3.80709
1.17258
2.11524
4.43724
2.50655
3.19819
2.98832
0.743374
0.331952
5.72273
5.00118
0.911555
2.21431
2.91855
5.52548
4.55779
4.4507
5.23984
6.34136
4.83789
5.6681
3.209
2.36943
0.613222
1.89874
2.57048
3.76613
5.33362
11.9918
0.909608
2.04663
0.755037
0.770073
0.394586
0.29637
0.331479
0.490597
1.8917
0.873635
0.391173
0.186566
1.18561
0.524854
2.08202
0.983886
2.44177
9.57816
0.144585
0.630843
0.957387
1.49135
0.976604
0.489465
7.26347
0.877803
0.362406
3.53139
1.47005
0.442083
0.394551
0.674359
5.11922
2.58016
1.4501
2.59798
5.00032
0.391436
11.6617
2.12861
5.63948
5.39296
5.23161
5.24074
4.26993
4.87193
7.10953
2.9064
2.90485
2.28233
1.90717
3.18001
6.17587
8.59045
3.24303
0.715112
2.10856
1.35666
0.335733
0.612543
0.501392
3.30866
2.86207
2.54085
2.35279
5.95121
4.75176
4.76703
13.6481
0.655956
1.64482
1.40626
0.662437
1.4407
1.21196
0.752311
1.15652
0.871842
0.473514
1.55536
1.15471
2.37914
3.02915
2.98693
4.67475
3.14183
4.43738
4.9892
6.70342
8.20259
8.46254
9.22033
8.61888
6.76771
5.40806
6.62878
5.90168
4.49192
4.07913
0.523285
1.6193
1.80342
2.19492
11.0686
0.404497
0.392991
0.15445
0.184074
1.50852
4.95627
2.32366
1.53668
0.794187
1.0621
12.9699
1.35987
2.1068
3.10204
0.528836
1.33799
1.1425
1.05063
1.41461
0.637108
0.573295
0.0918196
0.987238
1.17039
1.30716
0.259936
0.908895
1.01435
2.61518
3.51845
4.74103
4.93795
7.93198
6.47047
4.55342
5.60653
5.53172
5.89025
4.20152
4.53927
7.21574
2.89529
4.66984
1.75691
6.46554
4.23327
4.10038
3.61796
5.7506
2.50795
2.72617
2.79931
2.10857
0.548521
1.37535
1.90482
3.21194
3.97954
9.69923
6.33261
0.307871
1.23141
1.73256
2.83393
1.87428
0.205634
1.70158
1.07763
1.27825
2.51244
3.58039
0.778829
1.55869
6.30628
1.7198
4.75895
3.60376
3.67773
4.10561
2.47245
4.48357
4.9037
7.50684
3.0945
2.78143
0.622364
0.562367
0.384562
0.838396
0.689272
7.43129
1.92725
3.08315
2.06428
0.783297
0.83181
2.33612
1.06742
0.41111
0.982851
3.13604
3.23929
1.37946
6.00406
1.77836
1.59332
3.40093
5.26674
3.44749
3.90719
5.84282
7.15683
4.28122
4.3423
2.78061
1.12287
0.680815
0.792851
0.615747
1.86029
1.22618
0.12795
1.40017
2.67663
1.23381
0.337262
1.72587
0.903012
1.242
4.86462
2.55919
0.155132
2.58159
0.332881
0.0717989
0.159764
0.121343
0.0702508
0.719979
0.10064
0.196349
0.280972
0.366733
0.145629
0.0478598
0.0779905
0.64548
0.232729
0.317847
0.172469
0.161934
0.260419
0.0791296
0.292829
0.402522
0.0873192
0.0553163
1.06331
0.0947453
0.108982
1.87032
3.07209
2.49777
7.43896
8.05965
5.28248
4.33194
3.52879
2.41286
7.07714
2.34059
2.6368
1.89011
3.18762
3.99307
4.40269
4.9847
3.74837
5.0166
1.76355
1.88961
40.8694
1.66543
1.82266
5.51041
5.12327
4.54724
8.25016
2.6809
2.54841
5.76645
2.28888
4.44223
2.90935
2.28662
1.68253
1.44114
0.47886
0.690995
0.536216
1.22774
3.22156
0.867216
5.95821
4.05953
7.04481
5.64782
4.58035
3.82364
6.85949
5.20218
3.87392
1.69938
4.79851
1.14309
1.67632
1.05404
2.50754
3.24376
5.23811
8.11714
7.62193
10.4786
3.8289
2.51872
0.690163
3.09638
1.13067
0.20046
0.601624
3.84478
1.08663
2.80666
4.37321
3.98083
2.70053
3.18171
1.20025
1.90725
2.62803
3.03661
0.552277
0.754316
0.530135
0.479246
0.392704
0.108059
0.194608
0.181152
1.39415
1.28449
0.712603
8.02192
6.79592
8.81098
5.179
5.76769
4.73981
0.627886
2.51365
4.3193
2.81744
1.89377
1.35065
0.805671
1.28334
2.12091
0.713699
0.42236
0.846217
1.65656
0.900133
2.03517
3.02955
3.18702
4.97067
8.30467
2.22547
4.62324
2.54228
5.03482
1.22569
0.915988
2.16863
4.3401
4.61731
4.34328
5.64902
4.81116
4.71532
4.51645
5.55595
5.99033
6.23174
3.91898
2.57698
1.59846
1.77549
1.44121
0.310947
0.883321
0.535191
0.110281
0.675404
0.506331
0.881035
1.55961
0.276573
0.54463
0.937388
0.715526
0.57521
1.64893
1.14834
1.84898
2.07666
1.68204
1.16924
0.931064
2.96829
1.20028
1.18824
1.40869
3.98926
0.898398
8.94895
0.703426
0.60207
1.8999
1.41566
0.439057
0.474144
0.754729
0.366787
1.28205
0.926994
1.73974
1.7863
1.78002
1.41611
1.44346
0.835129
1.11141
0.40279
0.544111
0.82632
11.0489
2.66873
0.216494
1.33619
0.66369
11.7278
2.6754
2.67595
2.18143
2.2551
2.85641
0.768581
0.402283
2.76608
3.84916
2.13631
3.45202
6.21485
5.23405
5.59278
4.4061
4.85231
8.40018
12.1232
9.33196
6.35137
6.01027
7.26933
6.02337
4.57796
4.56882
38.6126
1.02465
4.31207
4.55491
5.46499
1.44885
2.66966
4.26939
5.75167
8.57942
6.29525
5.29885
3.74871
6.16528
4.25064
3.77581
0.407834
0.670174
0.388347
0.563723
0.786951
0.97742
0.44773
1.60554
1.126
0.434784
0.497166
1.21732
1.98104
5.31588
3.80254
0.558565
3.05242
1.29588
0.66839
1.37878
2.34724
0.67543
1.11134
5.22241
0.296361
2.44984
1.20782
3.52546
5.10334
0.726955
0.93212
1.98723
0.417
0.656696
0.241387
1.67893
0.996859
1.05017
1.56665
3.45402
1.66295
0.519286
1.08917
4.21726
5.27189
3.55827
8.54758
5.95982
4.13647
1.42934
2.41148
2.52607
2.13465
12.7121
5.52929
8.0719
7.84216
5.77755
6.58508
5.67612
4.10272
4.35721
1.89646
0.612772
2.39292
1.18831
11.655
3.466
11.6374
0.733913
1.45102
2.26376
2.16462
4.80248
3.28161
4.09976
2.41752
3.0224
5.24433
3.35358
5.24756
4.54025
8.90835
7.57075
7.3061
6.89432
7.04174
8.17128
6.48803
5.99929
3.08487
5.5345
3.94628
2.76276
0.158262
0.285217
0.595908
0.71964
2.04091
2.03458
4.72274
5.88202
2.95192
4.79353
6.79606
2.82078
4.68432
4.31644
1.47491
0.277961
1.46123
0.276999
2.228
1.33815
1.91617
2.42819
2.13498
1.42491
3.27861
4.81989
4.15814
4.76047
6.62089
5.17462
0.401621
1.32046
1.90223
1.2576
1.14331
2.35817
2.79128
1.39921
0.211675
10.6834
1.16548
0.900686
0.347689
0.860001
0.514019
1.68426
0.200619
0.432087
0.669527
10.5123
3.46411
1.29108
12.2012
2.48501
1.88755
0.127171
0.419166
0.244965
0.232209
0.314035
0.119735
10.3154
1.07133
3.42761
1.08203
0.467518
2.23333
1.00716
0.313994
0.989194
2.08651
1.16129
0.639488
1.32582
2.11208
2.21918
2.68018
1.59985
1.76643
0.610133
0.219835
0.475599
0.275745
0.115282
0.394269
0.120051
0.0170724
0.279596
0.344219
3.122
2.47588
1.79894
2.39949
1.10334
0.184851
7.18477
6.57906
0.393441
0.147772
7.62148
1.042
1.11986
1.06719
1.31052
1.19583
0.878058
0.59652
0.30299
1.58128
3.07258
1.14094
2.30804
0.301681
2.98763
1.29859
0.948812
0.722296
2.23022
0.812315
2.62085
2.48933
1.83483
2.17885
3.00216
7.33552
2.34844
0.920155
2.50226
1.05998
0.758866
2.79189
1.65124
4.29046
1.28916
3.70247
1.78239
9.09031
4.18782
4.09248
6.69068
8.44863
4.48557
3.18972
6.30784
4.60269
8.61884
5.85282
5.34247
5.15169
2.71058
1.3735
0.709097
3.96551
1.18921
1.33381
1.01483
0.0617404
0.491464
0.815379
0.773988
1.25108
6.78983
1.11725
3.99673
1.58745
1.46748
1.70511
1.56732
0.198232
0.929995
0.883627
2.11543
0.333261
0.533868
0.597439
2.67775
1.52522
0.638317
0.998997
0.651354
1.10924
0.90231
1.48703
1.68567
1.23995
1.74989
3.22872
3.24394
2.24663
4.55605
4.69122
4.6828
1.47584
0.740691
1.44533
0.355073
0.375226
1.12205
0.895136
0.204982
0.204906
0.0208537
0.362597
0.192328
0.703183
0.158956
0.0970675
0.123595
1.04333
1.61162
8.05416
6.13091
5.4807
10.9145
8.55058
7.46885
2.78051
2.63994
1.30807
0.573536
1.18936
3.16481
1.30418
1.58327
0.758235
2.10921
1.30218
0.306835
0.3366
2.34093
2.53898
3.31377
1.15232
3.61593
3.71926
5.82519
4.55084
3.57315
4.03729
0.498951
0.078178
0.450484
1.79205
1.60761
8.43989
1.53429
0.597032
0.41922
1.64786
2.70235
1.64016
4.21745
3.81994
3.60193
1.67675
1.86531
1.22135
0.799904
1.58158
7.57146
0.981232
1.68148
1.3948
0.25432
10.9195
1.04343
0.51279
0.590011
0.191142
0.152872
0.785448
0.386553
8.41214
1.18452
0.744266
0.940644
1.35271
1.80798
0.77707
0.925186
0.507497
0.368695
3.06359
1.85042
1.38576
1.57074
0.236818
0.549315
0.320601
0.225666
0.443373
0.448078
0.233611
0.0845784
0.314216
0.348208
0.0607435
0.937783
2.39168
5.49815
2.65142
7.47788
9.58115
4.73549
7.65991
8.53831
8.46841
5.90261
6.40802
5.66044
8.74639
7.30101
6.48718
4.97591
1.26163
3.12058
0.501687
0.999278
2.28635
1.39867
0.919271
1.86949
0.46745
3.48575
0.621791
3.34987
0.838647
1.28054
0.551211
0.850824
0.321879
0.281311
0.509822
0.726035
0.935407
0.460819
0.865385
2.43249
0.0624035
0.301855
0.0836871
0.410078
0.0212119
0.277765
0.128147
0.0885574
0.550355
0.0477132
0.146454
0.0882365
0.0291222
0.036418
0.0901736
0.0808749
2.57934
0.165662
0.775311
1.4696
1.06675
3.9046
0.409971
4.32558
1.08602
0.266918
0.803841
0.875558
0.377741
0.328817
0.348234
0.270961
0.520039
0.662235
0.240887
0.303369
0.611848
0.915574
2.28501
3.06034
3.84408
1.69869
2.55391
3.62456
3.70774
6.13961
4.32895
2.59754
1.33299
0.472706
1.62974
2.19913
1.83689
5.12245
7.86382
3.66601
3.48195
4.67327
1.62518
3.83191
0.840167
0.700757
0.636241
0.254685
0.527192
5.26387
0.776943
0.0953478
0.481164
3.30986
0.881566
2.90598
5.82502
4.05353
5.03333
3.77347
0.709835
1.69471
1.87271
1.46608
0.251878
0.473023
0.430775
1.17435
0.282777
0.135032
0.670563
0.67398
0.736718
1.00457
0.898554
0.73933
2.64213
2.00312
4.15211
2.90909
2.34141
2.1205
0.815863
4.89217
7.35289
6.5386
5.06466
3.31518
1.93874
3.34537
5.75853
6.26954
6.68902
4.4922
3.32175
5.68795
6.20253
6.15286
6.65913
5.54355
5.84906
4.08238
1.40809
2.27535
1.20134
1.04209
2.90559
7.18854
7.2182
4.78049
5.42784
7.398
2.08381
1.44776
3.02804
3.07775
7.65538
5.59051
2.16658
4.7397
3.39779
4.23477
7.12959
6.63329
6.08854
7.36207
0.523792
1.33693
2.77805
1.16632
2.14199
0.569174
1.90782
0.893203
0.793082
1.16927
3.16583
3.32045
2.46555
5.3739
5.24865
12.6235
1.74518
1.67631
2.87493
3.82408
5.05683
3.18896
1.83741
2.10877
5.67029
11.2452
11.8898
3.14
3.91314
0.587401
0.318963
6.13455
2.37483
0.731411
7.82547
1.90216
0.290418
1.49225
10.8387
10.7374
0.472854
0.418486
2.68964
0.983478
10.2799
10.8742
2.40578
4.03931
1.15832
10.5463
1.08239
3.55826
3.48568
5.69948
2.86403
2.26886
3.35613
5.06047
5.08715
14.0357
7.02382
5.96196
6.81
9.18875
13.9248
6.2379
6.60446
3.59624
13.0533
5.38858
12.9889
2.08255
0.442042
0.320944
0.169379
0.124859
0.360535
0.335443
1.6323
2.52618
0.909739
0.668064
1.41042
1.114
0.291444
1.99874
1.05037
0.975507
0.920797
1.41099
1.66032
1.06096
12.9893
2.14785
3.76835
2.78762
1.47091
1.76772
1.78247
1.90984
1.80876
2.81277
1.72198
0.276573
1.7
1.36157
0.436144
0.196444
0.116251
0.266465
0.0977013
0.0933171
0.101529
0.1452
0.098249
0.0457603
0.151744
0.0761478
0.150901
0.275644
0.0889378
0.458194
0.870455
1.90495
1.52388
4.31001
5.6931
4.94837
3.44872
4.96971
4.01636
5.18031
7.94447
5.07879
4.20154
6.17118
1.37432
1.48487
0.511923
0.938282
2.64906
3.9814
2.45046
5.86036
11.3283
7.06183
5.0492
7.93251
6.75636
8.29978
7.57103
5.71475
7.76196
5.34686
4.19644
2.50132
0.472709
0.484267
0.674103
2.93936
1.44007
3.408
1.15757
1.80007
1.9044
0.990498
3.8747
2.96171
4.36635
3.72472
2.39212
2.0113
0.685236
6.49736
2.51128
1.3071
0.550475
1.26949
3.54171
1.02338
0.806688
2.30873
4.13188
4.08985
2.84024
0.397364
5.08102
0.913119
0.328789
1.13275
0.379556
2.5292
0.891091
3.32629
0.719838
1.84396
0.944872
0.796667
1.42718
2.78074
2.65871
4.67648
3.28552
2.41778
1.57383
0.120199
0.32313
1.33769
1.22426
3.23334
2.07155
2.35681
1.4473
3.36891
2.72835
5.65516
2.20575
1.30474
1.9623
2.99558
4.64938
6.21928
4.64812
5.47726
4.32005
7.71824
6.48406
9.67665
5.42404
7.27011
9.8701
7.62989
5.20403
2.55035
2.58253
1.21683
1.65488
3.82343
2.03916
0.596147
0.287044
2.91173
0.545074
1.65223
0.726342
2.20846
0.875376
2.15121
0.624891
4.11956
0.979266
1.12872
0.344717
2.06833
1.81134
0.815357
0.756509
0.757603
1.58975
4.07455
0.1597
0.961479
1.22022
0.619423
0.440649
1.19393
1.04793
1.31369
0.292993
0.494814
2.58615
3.37169
0.517451
2.99161
1.81891
3.54868
3.51406
8.13009
3.85568
8.27126
7.90713
6.16321
4.97685
4.13293
3.77462
4.13456
3.64352
1.70608
2.95027
2.40485
5.79494
3.25585
5.81931
4.79609
0.927339
1.48816
12.4383
8.61378
0.745761
1.00456
1.04671
0.461219
0.133823
0.304946
0.805904
0.540302
3.97048
13.7867
9.57325
1.01664
1.93547
4.4804
7.21197
7.57397
6.90644
7.55313
4.05631
3.31466
2.35588
1.8278
1.54118
2.10698
0.351058
0.529678
0.860158
0.45098
1.01579
1.46481
0.788486
0.367063
1.66437
1.31721
2.0237
2.52101
1.1437
1.2617
1.38623
0.659069
1.2052
13.7277
4.31563
1.69414
0.0144741
0.207088
1.12452
1.60308
1.33232
1.58303
1.70602
3.21222
3.24004
4.21678
3.93444
6.00814
4.13897
3.36315
0.951981
0.810354
0.515041
0.26631
0.904216
0.538969
0.504085
2.9342
1.80503
3.32229
0.834143
0.308735
0.36176
1.23035
1.0706
2.92531
3.38897
10.4739
7.747
7.33581
6.49679
8.39366
9.10848
5.4456
8.06747
5.80335
6.07414
6.67621
5.83444
7.57092
6.72663
3.12614
0.424641
1.49297
1.42832
1.07802
3.66205
7.41473
5.59768
6.28639
4.73175
5.57959
5.22017
4.35261
3.48216
5.19384
4.49562
2.17154
1.24725
0.861868
0.305354
0.343608
1.56525
1.51597
2.38644
1.76187
3.94095
4.20101
2.03435
4.00589
7.30178
6.90862
3.85388
4.21557
3.88048
4.56635
10.4057
7.91133
4.5395
8.12167
6.44379
8.21533
6.18388
1.03097
1.97899
9.85236
6.56146
3.77115
0.824591
0.600081
0.958381
4.09313
0.870241
0.377588
0.333581
0.702256
1.68605
12.2395
4.33873
0.753802
1.66076
0.332067
0.962483
1.30789
1.87997
2.03402
4.5148
2.60941
3.61854
8.52549
7.42263
6.73773
7.30764
3.35238
3.17407
2.68478
4.36862
6.85913
8.55901
3.76692
6.04151
4.62125
2.09718
1.78701
2.36381
0.934328
0.766308
1.01488
1.39449
1.50118
1.5041
1.12862
1.9599
0.754992
0.537217
0.143157
0.850833
0.284474
0.297417
0.0853224
0.0685194
1.45082
1.41637
1.29316
1.06586
1.35328
3.4233
2.08525
4.81638
0.53417
0.387749
0.33372
0.267151
0.156404
0.139134
0.13065
0.11281
0.0399327
0.0949092
0.280583
0.146344
0.0994363
0.886414
4.3981
2.89919
3.75615
5.3523
0.551842
1.46055
1.70757
1.31607
1.05097
0.693308
1.27985
3.33782
5.73538
4.9815
4.58078
5.17229
6.48439
6.13908
6.58424
6.60015
6.7621
6.56015
6.69693
7.59245
7.03582
6.50598
6.72811
4.02814
2.98023
9.78886
2.43984
1.04083
4.0889
1.27054
3.57746
2.71595
3.29007
6.1844
3.79875
6.87053
5.77669
7.08473
5.51517
7.57533
4.04718
4.71143
2.64867
1.31227
0.831642
0.997247
0.450512
2.07706
1.25058
2.81949
1.87618
1.06214
1.00154
1.86257
12.2191
1.84485
0.718923
3.34447
2.12305
0.285515
1.03074
0.418394
0.424973
0.281575
0.395613
0.0548909
0.17473
0.364875
5.56145
4.24434
0.69994
0.729849
4.578
7.09252
3.36846
8.52486
8.17243
7.70575
6.92389
4.69998
6.56301
7.02498
8.90683
8.03764
5.0602
5.18095
0.392856
3.40132
1.33031
2.05907
2.20261
3.42287
7.41302
2.31035
2.4521
3.05378
4.165
3.71014
2.80463
1.40119
3.65177
5.25381
7.08513
7.97342
6.36221
7.66749
5.002
3.28616
3.91825
2.97415
3.26737
3.52515
2.26863
2.41131
3.08471
5.11741
5.00544
3.50507
0.626706
0.511073
2.20147
1.46129
0.95485
2.32761
1.79711
3.93372
1.18559
2.59825
4.71154
2.34559
4.64299
7.4532
6.20193
5.63397
4.82874
2.95753
4.38311
2.69525
3.57148
2.22875
0.201544
1.04798
2.47314
4.20548
4.55251
5.1467
1.56245
1.13173
0.500894
10.7727
0.394341
0.330096
0.461964
1.23815
0.449665
0.834946
1.2244
1.71647
0.428118
1.42956
1.80208
12.4179
0.421277
0.914969
1.97575
3.20199
3.36963
2.97789
4.36194
4.96861
5.15099
1.51493
4.0956
2.45151
6.57384
6.02051
7.53592
6.43153
9.25176
4.13461
10.3993
[truncated: 10,012 more rows]

## Sheet: Mouse 5_Velocity
0
2.8699
2.25131
1.41295
0.510864
1.55802
1.24216
0.847774
1.44087
3.65011
2.7665
2.64212
2.74228
1.7247
2.01357
1.02434
0.867371
1.88534
1.5773
0.913419
0.646118
0.890131
0.433162
0.544078
1.01358
1.45068
0.898892
0.6661
0.846628
0.816814
2.18879
1.48335
3.64455
2.98602
3.36278
4.00443
4.75957
3.97165
4.73669
5.45107
3.92034
3.75602
3.61673
1.00633
2.40326
3.10026
1.12686
1.28848
0.751701
0.245732
0.387924
0.065517
0.382508
0.109144
0.101786
0.116305
0.183178
0.0456133
0.117298
0.111608
0.0307587
0.184766
0.952173
0.134138
0.386026
0.374078
0.785057
0.115016
0.652888
0.166773
0.351403
0.617498
0.57445
0.501052
0.189909
0.279052
0.179539
0.17854
0.230907
0.119093
0.0575839
0.18553
0.624108
1.27485
2.60627
5.00492
6.30207
5.27276
4.57905
4.12245
4.06491
5.07317
2.24903
0.506362
0.67784
0.98552
0.66411
2.57522
1.22043
1.81934
0.945291
0.61632
0.321161
2.27943
0.0914978
1.08263
3.35685
4.82205
1.83563
2.8055
0.828874
2.19327
0.633025
0.217246
1.99478
0.346591
0.222417
1.87014
5.51718
1.09342
0.646151
0.727736
0.685753
0.441254
0.748041
0.260564
0.435547
0.846619
0.230434
0.176505
0.419732
1.08251
0.423061
1.90851
1.76597
3.43921
2.98727
1.80708
0.615842
0.17947
0.457342
0.769256
1.21711
0.386688
0.534081
0.571227
0.543159
2.03133
3.39526
3.27704
1.79443
3.57095
3.10756
3.10184
4.15003
2.80037
2.36116
2.12227
0.607385
1.95495
3.09975
2.67081
2.48968
1.58749
1.46994
0.937525
0.366971
0.701152
0.0900798
0.21175
0.772245
0.275777
0.912512
0.759298
0.766958
1.54885
0.9298
0.324068
0.162088
0.320787
0.429416
0.0881866
0.202509
0.295295
0.144559
0.262448
0.23718
0.263192
0.13978
0.883708
2.11263
4.02892
5.69673
4.74621
4.81953
4.7274
4.85334
4.11827
2.56017
2.08332
1.06592
1.97054
2.63271
2.41915
2.23527
1.24349
3.16384
4.18932
6.63237
5.69139
4.6267
4.10064
3.50162
4.34834
2.82117
2.07063
1.50228
0.421318
0.129568
0.36097
0.762889
1.35299
0.627813
1.00806
3.92021
1.33633
1.97546
4.57541
5.26952
6.54289
5.64989
4.13303
3.84056
3.00986
2.46927
3.41487
1.67528
1.00484
0.465449
0.793034
0.102348
0.614102
0.106356
0.263103
0.139592
0.31598
0.82714
1.72284
1.82041
3.6186
2.73374
1.45372
1.18187
0.146977
0.315665
0.141707
0.583705
1.02299
0.707099
0.828263
2.04336
3.81164
4.77193
5.44322
4.54408
3.5859
2.52277
0.594624
0.969765
0.809351
1.65603
0.761934
0.435836
0.35075
0.305082
0.150676
0.245316
2.44687
2.94237
2.03095
3.16785
2.51086
2.79641
1.77216
3.58551
1.89863
2.05922
3.21827
2.98464
0.305644
0.170608
0.623416
0.514092
0.179793
1.44769
2.46575
4.20332
3.01054
3.4821
4.06896
4.78043
2.85868
2.23181
1.56358
0.428301
1.2358
0.680777
2.33519
4.84866
4.69961
2.22933
2.81026
4.67988
5.73911
3.92323
4.36014
6.08125
5.01424
5.12192
3.09087
1.3445
1.27838
1.13397
2.65367
3.92009
3.61508
1.21495
0.493545
1.33356
1.08871
0.490188
1.13279
1.42506
2.76808
1.67177
2.0322
1.62595
0.242982
0.61868
0.627581
0.976348
2.43761
1.00417
0.775504
0.462014
0.448902
0.502208
1.13761
0.252095
0.188006
0.0588292
0.909685
1.33574
0.799946
0.091407
0.362997
0.224418
0.140926
1.18922
1.97441
1.07714
1.79175
2.4711
3.11088
1.76058
2.20479
1.47864
2.00341
1.98066
1.09926
0.487995
0.402865
0.811221
0.575023
0.731567
2.51028
0.385843
1.17482
0.459497
0.938661
0.436031
1.29467
0.513948
0.143313
0.903304
0.61566
0.260139
0.101144
0.269067
0.803811
0.728932
0.047679
0.113389
0.156507
0.157485
0.05702
0.0874997
0.158599
0.0332276
0.0875172
0.0465935
0.39636
2.02341
4.09025
4.40571
3.40971
1.817
1.43313
1.80667
1.20919
1.27294
1.01697
1.72973
3.19813
0
0
0
0
14.2848
4.59978
0
1.11205
0.985435
0.9125
1.39027
1.60144
0.881704
0.758829
0.45224
2.64094
3.98766
4.3919
2.33426
4.23117
3.27491
2.60182
0.747631
4.37273
6.00223
3.44865
2.0423
1.50847
1.65498
3.3311
2.52724
4.68951
4.53776
4.4594
4.26431
3.02503
2.06148
0.493155
0.802059
0.525039
0.744932
2.16818
2.96519
2.66607
0.317475
2.03776
3.26212
2.48598
2.41124
3.11203
2.66895
2.0956
2.2892
1.63027
2.10986
4.14711
1.24445
1.01623
0.617205
0.46127
0.536518
1.08796
0.947237
1.51538
1.43717
0.0591665
0.360079
0.479078
1.48624
0.373969
0.28829
0.702617
0.510697
3.63134
3.64725
1.83218
1.71022
1.02665
1.8773
2.61834
2.86546
0.961447
0.585881
0.55868
1.36567
0.523869
0.543405
0.79792
0.379682
0.0814919
0.132781
0.127882
0.174722
0.182652
0.149588
0.0616777
0.234136
0.123464
0.0188176
0.155948
0.0395384
0.0348078
1.51406
1.02629
0.484544
1.18703
1.0534
0.365393
0.420987
0.890614
0.826974
0.68636
0.820668
1.49667
3.82434
3.71429
0.240504
0.3514
0.36759
0.297535
0.259588
0.313373
0.217878
0.136164
0.0675107
0.118468
0.167473
0.753288
1.63462
1.52327
1.98317
2.16286
3.64312
1.91289
0.659921
0.354331
0.307188
1.41942
2.71775
2.74025
1.94224
1.18253
0.796551
0.7846
0.386742
0.481505
0.852901
0.693169
0.37647
0.951292
0.377982
0.820592
0.959478
1.38949
1.46239
1.49146
0.886356
0.504605
1.49028
1.61281
1.16731
1.44029
0.799746
0.670977
0.500832
0.232907
0.674465
0.35704
1.39112
0.485495
0.737325
0.370282
0.250397
0.362398
0.461398
0.525227
0.396055
0.16606
0.302692
0.56581
0.691894
1.01031
1.07779
0.547038
0.231676
0.283716
2.74378
1.65974
2.31421
0.937202
0.706253
0.610726
0.262259
1.8381
1.01211
2.49048
2.37926
2.04499
0.988684
0.598169
0.606601
0.477667
0.132909
0.170121
0.128799
0.232406
0.0814064
0.0825687
0.173738
0.0818674
0.150722
0.346038
0.607743
0.564991
0.804975
0.467082
0.366232
0.137014
0.311431
0.34922
0.91906
0.885739
0.597296
0.641803
1.19527
2.41864
1.72862
1.60194
1.57028
3.35873
2.91975
1.5214
0.340237
0.273699
1.28349
1.07331
2.70588
3.45064
3.2933
3.74533
3.69783
3.67128
1.97349
0.54497
1.19329
1.49859
1.58716
0.225499
0.685674
1.06765
1.01667
0.492999
0.346938
1.43105
0.58462
1.72864
2.13342
2.62586
1.97578
3.69953
2.88714
1.30453
0.59871
0.78145
0.335968
0.596308
0.742948
1.18938
3.65997
4.74642
4.78124
3.14441
4.04718
1.61505
0.95764
1.57576
1.18465
1.31452
2.44077
1.24685
0.644244
1.26381
0.658354
0.649489
0.893227
0.408301
0.154081
0.121006
0.0610603
0.806576
0.996751
0.136537
0.254398
0.0535979
1.02947
0.114681
0.296934
0.226914
0.0406303
0.41468
0.722964
0.564192
0.949263
0.289334
0.79222
0.63893
1.51702
1.35803
0.654062
0.811996
1.07261
0.774489
0.845731
0.419746
0.384625
0.837137
1.55836
1.48899
0.287983
0.175577
0.219731
0.511765
1.12953
0.66912
0.822732
0.5922
0.753114
0.731644
1.60478
0.067561
0.421883
0.518818
2.21831
0.456554
0.765453
0.762989
0.24334
0.0339126
0.228062
1.42135
1.7115
0.371537
0.71368
1.31102
0.705531
0.390773
0.476197
1.02463
0.657527
0.0570018
0.655265
0.520912
1.71964
2.32071
2.66121
2.28069
2.83959
1.19871
1.27418
2.70751
2.11211
2.59905
1.65698
3.04181
3.60952
3.67515
3.37467
4.61473
3.20489
1.45403
2.80249
1.27555
1.15744
0.40842
0.777592
4.38887
4.2256
2.85441
2.85352
2.48233
2.68937
2.44853
5.61131
0.67825
0.851992
5.80763
4.566
3.50316
4.6576
4.20293
4.62291
5.69274
3.76565
4.12675
3.44816
3.94295
4.95198
5.8385
3.21972
2.59132
4.41586
3.81196
2.44064
0.747004
1.29417
0.683633
0.3161
0.686147
0.277627
0.375458
0.640373
0.454443
0.320767
0.770053
0.388399
0.379929
1.0902
0.887976
0.212069
0.231474
0.0621486
0.538635
0.578415
0.709848
0.565945
0.603519
0.277342
0.127945
0.193461
0.0914339
0.028139
0.057816
0.023655
0.0719405
2.97907
1.79984
0.324686
1.08247
1.58061
4.07275
0.402406
0.532809
2.81836
1.42381
1.56387
1.72028
2.16777
2.14872
1.50633
2.42406
1.93323
1.75567
2.01926
2.68087
2.71156
3.23903
0.958808
0.848781
0.945341
0.856109
1.51211
0.501194
0.342535
0.279829
0.150002
0.377736
0.212972
0.104937
0.224183
0.0731171
0.199962
1.04739
0.67346
0.954529
3.74669
3.4232
3.48692
3.87533
3.52868
2.79861
2.01546
2.46767
4.24388
5.54745
4.14454
5.21613
4.34021
5.32703
5.65683
4.74766
5.41167
5.19479
12.122
1.2906
0.0869678
1.35715
2.54713
0.989587
1.481
0.653061
1.37441
3.81635
0.614179
2.64674
1.58852
1.84953
2.34879
0.128117
1.58958
1.16108
1.75523
2.54775
1.49156
3.39003
3.60948
3.54021
2.49383
2.92959
2.87604
2.32911
2.19077
1.16907
4.68861
10.0487
3.93671
1.32359
11.3772
2.63168
1.23336
0.101696
0.826796
1.94057
2.6042
0.684254
3.31765
0.711809
2.57415
1.20818
0.634769
0.430326
0.109862
8.11922
0.112721
0.316095
0.187554
0.455027
0.157909
1.83267
1.59275
0.7322
3.06741
1.33311
1.9884
1.87519
0.673721
1.17073
2.28757
3.60987
3.47733
3.45905
3.77817
3.13498
1.83668
4.18246
4.42923
3.96882
3.82205
3.50302
4.08478
2.79588
1.17509
0.760047
2.28255
1.22446
1.11619
0.336953
1.22451
0.473352
1.30141
0.934119
1.48595
0.759934
1.23693
1.59846
0.524142
0.191547
0.181623
0.28093
0.923607
0.707751
0.132738
1.65579
1.69311
0.93572
1.38283
1.51547
1.70209
1.34568
1.02268
0.134601
0.479044
0.449877
0.55846
1.26603
1.31472
0.391843
0.0981383
0.0648956
0.22859
0.0807246
0.257671
0.427942
1.28472
2.53225
2.02022
1.23898
1.70383
1.4032
1.44075
0.767714
0.622367
0.71482
0.364496
0.429911
0.0561936
0.0283271
0.125402
0.113307
0.0620797
0.0551603
0.088504
0.0194144
0.0318485
0.194903
0.025875
0.242665
0.249795
0.0962839
0.222995
0.126023
0.0308632
0.0965227
0.222357
0.346918
0.524917
0.504319
0.125764
0.610936
1.39447
1.79172
1.76542
2.16018
3.79149
2.40241
2.86717
1.79934
2.98654
4.0439
4.10257
3.06196
1.97611
1.51093
1.11947
0.330482
1.90673
0.985044
0.814107
0.29454
0.777661
0.588119
0.168086
0.31127
0.726417
0.42832
0.4673
0.678624
0.529098
0.328631
0.14917
0.541856
0.43761
1.86499
2.14576
2.61223
1.80039
2.13743
1.38438
1.69574
0.855336
1.20313
1.25619
3.859
3.75769
3.57595
3.59897
0.765261
0.663024
1.186
1.0626
1.4415
1.24275
1.36377
2.44203
3.01484
3.20986
2.25523
2.17342
2.59094
1.87758
2.85834
3.78243
3.88235
2.71044
1.88556
1.08121
0.686627
0.0527552
0.732169
0.489907
0.522995
0.541451
0.487329
0.538266
1.43568
0.987134
0.704409
0.595917
1.15434
1.34203
1.36416
0.505258
0.575575
0.416702
0.159837
0.487065
0.612134
1.68665
1.51949
1.04484
0.658123
0.637138
0.86659
0.196427
0.376953
0.17533
0.176237
0.389972
0.663637
0.253169
0.304648
0.144162
0.319208
0.230053
0.182675
0.0559949
0.307989
0.806029
0.438209
0.306651
1.21471
3.40739
3.88768
2.73715
1.38856
0.964696
0.293235
0.89903
2.26457
1.59972
1.15631
0.652301
0.729527
0.814034
0.321688
0.0860951
0.0952107
0.418162
0.818378
0.739814
1.18508
0.840592
0.446414
0.770179
0.136251
0.458041
0.583084
0.315527
0.0943091
0.310165
0.061417
0.187243
0.64686
0.308137
0.1266
0.19517
0.0929638
0.111397
0.18582
0.633578
0.369281
0.27695
0.15585
0.163053
1.16747
0.283252
0.415801
1.14871
0.273398
0.497534
0.802411
0.704501
1.03896
0.946542
2.53572
2.52512
2.71875
1.48742
0.583673
0.423569
0.854827
0.735407
0.45186
0.241783
0.31001
0.297541
0.0650466
0.233201
0.764312
0.122355
0.879888
0.711049
1.3804
1.48114
0.841995
0.301664
0.28509
0.284974
0.25501
0.481235
0.0718948
0.265822
0.20682
0.172997
0.163476
0.487835
0.758803
1.1388
0.592831
0.378669
0.282549
0.371159
0.227704
0.0617581
0.0516067
0.965001
2.22728
1.22696
1.27651
0.522037
0.149573
0.348839
0.223558
0.159062
0.373214
0.0244959
0.0917527
0.160509
0.291119
0.234863
0.1897
0.257259
0.403534
0.191804
0.172637
0.205626
0.0715063
0.141834
0.271601
0.102481
0.0673031
0.0666354
0.208866
0.0547982
0.199499
0.272038
0.474638
0.0705814
0.765675
0.496685
0.447471
0.233864
0.345371
0.280431
0.155604
0.483804
0.500112
0.473174
0.629221
0.69382
0.589622
0.312852
0.273112
0.41389
0.25334
0.0864834
0.162956
0.0351269
1.00163
0.927869
0.164519
0.443839
0.413353
0.265696
0.103334
0.655745
0.286956
0.494358
0.305611
0.196237
0.35763
0.229659
0.293544
0.757853
0.383596
0.569615
0.0690059
0.185086
0.208674
0.571275
0.44075
0.588001
0.127879
0.27312
0.220461
0.178673
0.121053
0.100617
1.03811
0.237882
0.254314
0.314767
0.0309433
0.0950489
0.194884
0.524134
0.245014
0.867978
0.423819
0.238677
0.813634
0.527322
0.281466
0.214738
0.490558
0.257579
0.401744
0.309125
0.425951
0.432707
0.208274
0.300273
0.121226
0.239825
0.181645
0.0847421
0.0859401
0.121315
0.215589
0.443294
0.279548
0.599332
1.07329
0.446077
0.427256
0.677315
0.308739
0.376513
0.378664
0.505538
0.249034
0.0939445
0.193051
0.11313
0.19039
0.15599
0.137029
0.429864
0.36325
0.241602
0.519269
0.491832
0.309375
0.758411
0.239229
0.192906
0.162083
0.177565
0.292796
0.233648
0.156582
0.147316
0.057487
0.00730448
0.128811
0.140444
0.153967
0.866149
0.280549
0.386837
0.470262
0.512345
0.597182
0.316612
0.801379
0.450463
0.0318863
0.167577
0.210164
0.189651
0.296606
0.900541
0.567923
0.247149
0.960829
0.528635
0.957032
0.47962
0.435309
0.901547
1.7386
1.07295
1.5937
2.64814
1.67986
2.21251
0.570356
0.880436
0.186137
0.513609
0.234455
0.377834
1.06696
1.18793
0.324078
0.559765
0.173662
0.658514
0.603046
0.21518
0.250739
0.439588
0.903837
1.34345
1.31235
2.3478
2.51522
0.754688
0.54124
0.171032
0.41864
0.678857
1.02298
1.18985
1.28837
0.874335
0.8825
0.797613
0.258108
0.410121
0.316449
0.871209
0.9577
0.240475
0.689571
0.0605145
0.244366
0.413637
0.250467
0.143303
0.177525
0.0870017
0.0309288
0.0156909
0.116647
0.220449
0.0669869
0.042827
0.0699713
0.675211
0.227654
0.752591
0.127478
1.11692
1.05359
0.905136
0.806599
1.98576
2.28039
2.34868
3.35011
3.9144
3.91575
3.39403
1.94176
0.340055
0.587259
0.708707
0.36552
0.370734
0.471519
0.564897
0.364145
0.0419446
0.0879197
0.0541892
0.216363
0.275146
0.285842
0.378038
0.707099
0.743665
0.533109
0.792881
1.06181
0.561459
0.456929
0.80892
0.175485
0.220398
0.0966952
0.0985151
0.0944813
0.0620638
0.188639
0.0425256
0.0980848
0.17724
0.0518171
0.141879
0.00577366
0.0778654
0.0798742
0.113449
0.0743351
0.105308
0.16025
0.0395676
0.029623
0.0408864
0.0433476
0.163233
0.272049
0.369805
0.420449
0.377772
0.294865
0.275695
0.276479
0.128868
0.26028
0.235801
0.127187
0.0811648
0.0236874
0.137357
0.139157
0.0182124
0.0799398
0.0620493
0.0435758
0.196286
0.284672
0.264316
0.0976818
0.147442
0.191656
0.178
0.296143
0.818064
0.518908
0.172361
0.510648
0.102783
0.257679
0.0860988
0.562827
0.0568934
0.170428
0.0576434
0.0972147
0.0833675
0.0892716
1.08923
0.348151
0.417808
0.222981
0.642114
0.444447
0.45489
0.190967
0.47364
0.431489
0.31198
0.6478
2.512
3.81505
3.79358
1.2956
1.41477
1.71076
1.72293
2.10869
3.38191
3.68021
3.71826
3.04158
1.68765
1.93267
2.31131
2.20519
4.11698
3.67296
2.58865
0.246176
0.207166
0.337344
1.00956
1.63101
3.28068
5.15768
5.74127
4.9006
4.4763
3.02268
3.75229
3.48444
2.53838
0.925189
0.703507
3.07668
1.07548
0.347592
1.27152
1.24215
1.02715
1.51135
0.417734
0.20577
0.312572
0.862727
1.59475
1.40655
0.528501
0.572069
0.507001
0.992046
6.30467
1.2084
0.901879
0.484294
0.418173
5.0013
0.255803
0.462998
0.907322
0.628286
2.71671
1.61538
0.447498
1.75856
1.33395
0.626829
2.10831
3.02686
2.35266
0.452911
1.55361
0.183353
1.22083
2.58827
2.32266
0.712481
0.583223
0.775168
1.02398
0.533062
0.513727
0.68952
0.677015
0.44711
0.106652
0.139111
0.338285
0.186594
0.245692
0.455082
0.291878
0.390285
0.461915
0.363886
0.403528
0.08281
0.118196
0.268323
0.193671
0.337998
0.350541
0.311192
0.425319
0.216652
0.103633
0.207229
0.504139
2.20724
2.79646
1.75679
2.78714
1.59678
2.7204
1.96681
1.08299
1.15541
0.755085
1.06854
2.51856
0.864356
0.253044
0.351672
0.769152
0.224282
0.306457
0.321533
0.644859
1.74172
3.72098
3.97296
5.76431
3.60247
0.618341
0.225734
3.46777
5.12803
6.14518
5.86803
4.49847
4.1681
4.74767
3.7929
4.90563
4.97458
4.42255
3.75675
5.0651
2.80905
0.495168
1.00883
0.283186
1.22497
1.8797
3.21083
1.72524
0.800005
0.193896
0.105024
0.626797
0.530651
1.36794
18.2193
0.805459
0.75333
1.52351
2.83859
2.62564
4.76773
6.30887
0.146351
3.2931
5.68766
5.00224
3.78202
1.30206
5.17105
0.84511
0.937624
0.848892
0.307665
0.596802
1.01545
1.94439
2.20484
0.69114
1.04663
2.51842
1.05755
0.0380959
1.26702
2.26608
2.59149
2.50425
1.763
1.21658
0.523605
1.43145
1.71689
1.12182
0.560638
0.665477
1.27029
0.615346
0.660401
0.412415
0.325575
0.421873
0.432159
0.0394609
0.627891
0.237226
0.246551
1.77869
2.31463
1.56293
1.15647
0.488315
1.22526
0.556358
0.394579
2.61153
0.811714
2.06371
0.281093
1.60338
1.27111
1.14714
1.00338
1.48472
3.94941
5.19084
1.55073
0.85044
1.51429
1.8198
2.28783
0.218553
1.08032
0.663937
0.434781
1.12392
2.33301
1.97346
3.50026
2.48955
4.47994
3.89214
2.69641
0.605528
0.315501
0.080747
0.751112
0.944936
2.48394
1.80503
1.2784
23.1673
1.35354
1.78092
2.25637
4.28978
4.25345
4.57658
4.97422
5.65529
4.64916
5.19256
4.35691
5.83449
5.05248
6.08897
4.91797
6.07591
5.77775
5.13698
4.43239
2.34548
3.68885
4.75505
4.16832
3.93485
3.37332
3.36382
3.14744
1.42359
0.539934
2.19961
2.30528
1.81194
5.02851
0.516423
1.25641
1.14968
1.81949
3.69669
0.755591
0.344243
0.436134
1.4761
2.58592
1.26695
1.42482
1.49706
1.59694
1.37387
1.14839
0.777716
0.397988
0.488309
0.597962
1.55978
2.0018
1.50239
1.10883
1.21844
1.28963
0.293127
0.691242
0.587367
0.874717
4.192
0.928693
4.19743
3.86438
0.896803
0.688279
0.831797
2.26581
3.3706
1.18192
0.492282
0.736722
0.177809
0.0220097
0.0423134
0.0115132
0.190679
0.100743
0.0418623
0.169759
0.248457
0.611749
0.367939
0.490662
0.61715
0.208095
0.525339
0.341275
0.743941
0.31399
0.270619
0.347625
0.0541269
0.0235737
0.157465
0.0635721
0.117059
0.107052
0.0910645
0.0325394
0.00847455
0.265713
1.55569
1.34823
0.365338
0.757267
1.34381
1.89744
2.39697
1.08447
1.3648
0.49987
1.75417
0.935509
0.717207
0.762124
0.348911
1.34824
1.30437
0.520254
[truncated: 10,012 more rows]

## Sheet: Mouse 6_Velocity
0
1.15586
0.623942
4.86697
3.5096
0.392699
2.3049
2.01684
1.19325
1.06535
0.982764
1.71379
0.857985
0.503145
2.43699
1.11282
0.488938
0.754569
2.15033
4.88284
4.47753
2.82622
3.97275
1.79358
1.76398
1.11369
0.474561
1.70587
1.88802
3.3521
3.53385
2.76067
5.64898
7.7521
6.38005
2.25333
2.69472
7.15013
1.07594
0.536044
0.501346
1.97589
1.94982
1.48052
2.05087
1.83536
1.15012
0.425831
0.308822
1.93862
1.09197
0.94188
2.54368
3.44623
3.47323
2.29084
1.04794
0.544727
1.90136
1.63905
1.34559
1.5772
1.79098
2.015
1.18827
0.790561
0.158732
0.141019
0.248586
2.57239
0.43701
0.24261
0.937775
0.78979
2.50118
0.968561
0.783218
2.81482
0.378428
0.366358
0.135152
2.75932
1.50764
0.487713
2.02328
2.33581
5.13007
9.67653
7.95075
8.35778
8.06316
10.8037
9.65031
7.84854
9.08603
7.88868
5.81634
7.97826
3.76318
6.17466
6.19753
6.5323
6.87952
2.13579
5.10603
3.88727
2.70907
3.09801
3.71295
4.90705
2.79694
2.43063
1.84649
3.50187
2.89151
1.3333
0.314147
0.52588
0.183309
0.113639
0.448061
0.201067
1.32518
1.35954
1.07097
0.562146
0.155011
0.300161
0.887874
2.40823
0.716952
0.635237
0.199668
1.23298
1.07865
0.338104
1.12872
2.00896
3.06684
2.82776
3.78631
7.16724
4.03068
2.55305
2.21717
5.26876
6.27498
5.05655
7.448
5.66581
0.849446
1.6972
6.43563
10.4835
7.49499
6.53649
8.2326
7.58146
8.03528
7.33892
10.6043
7.44929
5.3876
4.59481
3.4006
1.44156
1.82421
1.55214
3.80674
5.13634
0.596996
5.86019
3.13049
0.227336
0.29434
9.88804
1.57557
0.571498
1.94977
0.0752837
6.16198
5.98689
0.885352
2.09824
3.69488
2.86748
1.64634
0.53966
4.0398
1.84002
0.420405
1.43631
4.84267
0.834051
0.420789
0.0835529
0.564315
0.223289
0.371276
2.37417
2.91435
0.0698644
2.06077
1.80542
5.12862
0.544175
0.236066
0.135726
0.201764
2.51964
4.63585
4.6255
0.579908
0.567676
0.324837
0.493503
1.19341
1.22803
1.34635
2.45403
0.548631
0.927989
0.928804
2.0637
2.19563
4.74517
1.71733
0.629534
0.505639
1.56618
1.82209
2.52724
0.216615
0.114005
0.461632
1.15633
0.270756
0.0625609
2.57817
1.95219
0.37484
3.24553
0.0921986
3.36392
2.68225
1.03037
2.41633
1.9936
2.28699
0.919339
0.025447
0.474795
1.47897
0.16418
0.906959
1.23539
0.492787
0.754667
3.46816
3.19272
1.83168
1.22603
1.09362
1.26167
0.237644
0.547745
2.54683
3.65474
2.32703
0.510079
0.920218
1.8685
8.04942
5.55636
2.56281
1.15271
1.19843
0.207274
1.04291
0.735664
0.586491
0.816336
0.316547
0.169216
0.512775
0.360606
0.5523
1.51156
3.07778
2.54684
3.47983
4.45025
1.05906
2.94476
2.08558
2.75538
1.19483
2.27125
2.84686
0.476082
0.195289
2.90667
0.707949
1.61799
2.39492
3.04667
3.49003
1.26638
0.40923
1.7271
0.0918335
1.22656
0.542836
0.129225
1.55078
0.612474
0.305259
0.276017
0.133704
0.232376
1.58137
4.86114
5.94064
8.12868
9.56631
4.59478
1.20268
4.68002
3.83887
1.56345
4.8145
1.06365
1.44428
0.0795191
0.269459
0.800093
5.04183
2.6285
1.35989
1.71236
2.25424
0.408818
1.91487
0.634624
0.205892
3.10532
2.91608
0.561021
2.06009
2.46334
1.20594
0.984948
0.900857
0.238732
1.00875
1.67854
1.56187
2.85923
2.01988
3.23389
1.04594
4.45266
4.76938
2.36563
4.32936
4.08648
0.735049
2.58174
6.84629
6.69526
3.25897
0.941428
1.92509
3.88372
4.73275
1.1322
0.498507
0.499503
3.20487
4.50566
7.7617
9.77979
9.16661
3.21193
1.68757
3.90307
3.38502
2.7776
2.91256
0.529335
0.273081
0.722418
0.157781
0.796669
0.99154
1.78974
0.875497
0.64075
1.21643
0.931302
0.187599
0.550196
0.84509
1.74529
5.9838
7.69562
7.41591
4.65764
6.84666
8.34136
3.63859
7.5704
5.24204
7.57896
6.58508
4.30308
1.86063
0.638479
0.4714
1.7733
4.9722
0.443246
1.85002
7.36855
3.60971
1.49519
0.276711
0.234556
0.889084
0.3713
0.906305
1.05033
0.0354743
0.209264
0.373508
0.470106
0.948715
1.59988
3.66739
2.46338
1.62788
0.601594
0.195093
1.52198
1.75078
2.86966
7.55519
4.47906
2.98285
2.08484
8.71593
11.4525
9.98018
4.80024
4.09422
3.66872
3.78897
3.86389
7.58928
3.4501
1.66253
5.94788
3.52976
1.35978
0.506068
1.8799
3.30055
0.346023
1.95469
2.22909
3.89708
3.74613
1.05206
0.841887
0.424263
4.48753
7.85577
2.02162
2.22625
7.03391
6.35167
4.01813
8.61167
5.95141
5.12335
0.938793
1.53457
1.73159
0.37712
1.98946
3.43807
4.30978
8.92164
3.39025
0.844251
1.05868
0.11176
2.25975
2.38512
0.330534
1.08216
1.16056
2.79714
1.84287
0.757027
0.907223
0.61562
0.74544
3.58657
4.68989
5.75903
5.02673
8.09628
9.43872
10.9016
11.9028
8.90971
3.44498
1.44643
1.37465
1.97868
3.73908
5.22766
4.83852
8.23978
7.12696
6.20211
8.22781
6.32594
6.27289
4.85358
8.69207
4.92973
2.15633
0.906297
1.27676
2.76769
0.877353
1.18488
0.288096
3.46758
1.51041
2.96874
0.161848
3.61888
5.64346
13.4401
7.99531
4.7526
7.69264
4.32441
4.1123
2.3101
1.37562
2.29308
0.6438
0.223944
0.276388
0.523477
3.61306
3.03957
0.65157
0.637259
2.62582
7.34611
7.4168
8.86448
6.22366
5.41705
4.95484
2.42735
2.3596
1.76904
4.56082
2.345
0.466046
0.912364
1.01389
0.857454
1.75917
2.74453
1.49431
5.86653
4.88335
9.75126
0.355484
3.05424
0.74245
2.37419
7.81581
4.58634
0.928698
1.23359
5.13769
9.07905
7.07846
8.14062
9.5326
1.93174
2.33462
4.37761
5.79416
2.01358
4.4387
1.79172
2.37566
5.87437
0.815139
1.22245
3.61122
0.953179
0.993582
0.60533
1.33103
0.697302
3.00913
6.89319
2.57986
0.88456
0.996529
4.08301
1.57983
4.44853
3.07903
3.51129
7.46736
4.80832
5.3077
8.43013
5.76082
2.28701
3.74757
4.33149
1.86714
4.55904
7.60656
5.11456
6.19525
5.14754
2.6833
3.16046
4.16411
8.2194
10.1025
6.15237
9.55499
8.33952
5.55734
6.09114
7.45573
3.87324
1.67426
0.759363
1.92732
2.0394
1.77667
4.93195
0.126868
6.25435
5.74696
1.38086
8.30158
1.82217
1.46864
0.950135
0.860327
2.42848
4.45303
5.28945
5.20686
3.59249
1.68254
5.31204
4.9821
3.00204
1.36549
1.33289
2.92373
6.37783
4.20387
4.98385
7.31831
5.36563
9.76726
7.12862
9.0302
3.47302
4.89601
2.42369
2.62214
3.85714
1.91553
3.25505
2.78301
5.44797
6.64066
5.43765
2.95138
1.59364
2.09444
3.15537
2.70109
0.361745
0.417911
1.03125
1.16509
0.18732
2.16031
1.89225
2.2477
1.47102
2.48905
4.13174
5.76484
4.03736
2.99665
5.03655
9.21927
8.30949
4.10643
4.93877
2.15544
1.78697
1.30012
7.37633
5.63309
2.21327
1.40396
0.19083
0.704936
1.5096
9.37118
0
16.1026
5.85929
4.19783
5.59024
1.15204
0.934462
0.733597
0.160408
0.591362
0.121722
0.480381
0.518597
0.645942
0.178704
0.171899
0.313904
0.612569
0.486747
0.594662
1.08915
0.862474
0.713986
1.89847
1.6688
0.673466
0.433832
1.01339
1.48196
0.583675
0.842495
1.08591
0.883021
0.804228
1.15047
2.15206
0.96662
2.1406
1.98814
2.1723
2.26542
1.73429
0.468946
0.333804
1.2654
0.465304
1.01991
0.231976
0.518001
0.806705
0.296717
0.80815
0.36131
0.738781
0.150462
0.517762
0.186359
0.728343
0.749447
0.685073
1.70033
0.655534
0.603265
0.792357
0.375161
0.285188
0.128503
1.3534
0.506429
1.25354
0.289874
0.318638
0.883025
1.13402
1.02192
0.257978
1.90418
0.943522
0.313775
0.276932
0.321182
0.792475
0.177481
1.09249
0.0255004
0.247327
0.273047
0.941105
1.82216
1.42222
0.480851
0.249594
0.520288
1.46928
1.02253
0.3251
0.501864
0.832005
0.457369
0.486999
0.4419
0.24802
1.22049
1.04264
0.651316
1.46474
1.68596
0.390096
0.138654
0.955211
1.69557
0.390495
0.864811
0.899769
0.567622
2.06129
0.935577
2.24519
2.42718
1.4333
1.79738
1.95056
1.18617
0.981543
2.09247
0.249046
1.08881
1.036
0.640533
1.43792
0.585729
0.811581
2.42822
1.42773
3.74657
0.317786
0.218926
0.626997
0.306816
0.984198
0.179118
0.771246
0.148765
0.619423
1.90054
0.816361
1.43401
0.273168
0.117984
0.735715
0.649276
0.228325
0.315213
0.570223
1.61297
3.89273
4.49059
3.38464
2.74823
3.9835
5.02023
2.92677
2.20694
1.47647
0.431235
5.36215
0.591384
1.75677
0.549248
0.621983
0.298098
0.0771208
0.19843
0.159495
3.50892
3.94837
1.58897
0.98227
1.04894
1.41072
1.38309
2.38195
4.9215
5.67046
2.26642
1.49179
1.14072
0.577335
2.20932
1.99391
6.09068
8.70988
9.13599
8.42842
11.1644
10.8934
6.55156
4.77507
5.39216
2.0292
2.06459
3.32782
0.272414
1.12073
0.615244
0.207606
0.100174
0.411593
1.53151
1.2907
2.97437
4.44988
5.96198
5.57408
4.68869
6.95869
7.26915
5.61519
2.23661
1.96552
5.5035
4.31618
3.56827
5.3244
11.8673
8.16685
1.36448
0.963079
0.515033
0.678554
0.709637
1.22734
0.384712
0.224786
0.380118
1.01425
0.994971
1.7316
2.03621
0.704537
1.68545
5.24127
5.642
5.21537
0.758463
0.405178
0.592681
1.78065
0.670894
0.866709
0.154639
0.162707
0.863897
0.800151
0.320183
0.210642
0.055441
0.66236
0.780776
0.290991
3.30042
6.15024
3.93808
2.75363
0.954837
0.537373
0.12611
0.175155
0.335324
0.635315
0.520004
0.173895
1.93273
1.18248
0.133935
1.41291
0.345791
0.961599
0.655553
0.280883
0.75117
1.16069
1.39098
1.31899
1.08197
2.06414
3.83383
5.03944
7.03141
3.9565
2.79718
2.74932
3.77489
0.603679
4.50691
0.909234
0.299507
0.869099
0.708237
0.796609
0.063565
0.0525029
0.514652
0.177513
0.22737
0.358936
0.431576
0.472634
0.202453
0.478137
0.341481
1.05027
0.4889
0.16318
0.438236
0.667657
0.847562
0.897994
5.32772
0.672951
1.32823
0.972419
1.57585
0.860049
0.461402
0.482967
1.08819
1.00916
1.15056
0.0940445
0.507464
0.558769
4.24738
4.57798
4.85961
4.53298
0.502473
4.91869
0.335212
0.189493
0.13656
0.327603
0.216082
0.0989465
0.206108
4.66799
4.62712
4.75322
0.251879
4.637
4.96767
4.85429
4.66848
0.217689
0.107741
0.494044
4.3558
0.392485
1.16154
1.18391
1.47686
1.12964
0.665448
1.45372
1.92774
2.77013
1.31534
2.89954
0.652984
0.336095
0.642534
1.57097
2.49855
1.13118
1.74152
2.14896
0.867813
0.239552
0.735751
0.615624
0.128773
1.68932
0.336927
0.120413
0.787424
0.0969753
0.205819
1.21443
0.318395
1.13705
2.6403
1.0741
1.54314
1.36795
0.223401
1.56453
2.08329
1.64364
1.40614
0.775871
0.78925
0.315556
0.240394
0.433859
0.669779
1.86691
0.845509
1.16073
1.53665
2.1678
1.1242
1.84798
4.80961
8.96796
1.91565
1.32458
0.872294
0.891401
0.698092
3.19884
0.52603
0.550277
0.719355
0.699917
0.760908
0.778597
0.231536
0.207717
0.0509649
0.0884792
0.224018
0.187939
0.326185
0.187597
0.224463
0.0736988
0.358958
0.0429036
0.063285
0.206542
0.311733
1.5224
0.424949
0.717531
1.15437
3.88756
2.43372
1.91513
0.454354
1.97062
1.33168
0.467277
0.965811
1.70243
2.55376
3.22206
1.98004
0.984514
1.80547
0.664896
1.34405
0.113509
0.919776
0.351552
0.560339
0.497167
0.393564
1.05485
0.789497
0.0721532
0.333813
0.413431
0.799329
0.231235
1.69585
1.08718
0.225178
0.156118
0.656648
1.45332
1.6809
4.11908
4.82002
3.31369
2.99516
0.651918
2.8198
2.1601
1.00916
0.711362
1.24833
0.266605
0.137627
0.237765
3.83959
3.90576
1.66018
1.65361
0.694358
3.54175
0.663093
0.471221
5.13651
0.802506
8.29902
0.949763
4.45258
1.97544
3.85207
0.611488
0.460658
0.993434
0.972332
0.456517
0.901198
0.603321
0.305241
0.269944
0.631268
0.687719
0.516375
4.9397
1.4731
1.0222
1.17391
0.409056
0.515832
0.31327
0.357687
0.522947
0.696244
0.0691332
0.0444044
0.144473
0.132393
0.460231
0.601402
0.214407
0.522776
1.20672
5.37943
4.97024
6.69411
7.76209
7.53048
9.55709
9.22759
9.04839
6.6636
9.02479
9.41736
9.4513
9.07523
5.20595
5.59525
5.7365
1.67891
0.681609
0.894954
3.11923
7.42452
5.16207
4.25059
6.72927
5.38367
4.47323
2.64574
2.62298
2.0776
2.90306
2.68457
3.30688
4.45355
1.757
3.61853
2.92956
0.223546
0.67389
2.07135
0.87188
4.42774
0.239688
2.61175
2.71946
1.51084
2.65438
2.66555
4.93348
5.41052
5.87423
3.58704
0.612985
1.52538
1.77999
1.67863
0.118034
1.36931
1.2487
1.78005
4.10087
6.6138
4.37413
2.92164
2.26806
3.53133
1.17639
0.0930457
0.786683
1.65766
1.27738
0.68166
0.453644
0.760034
0.167301
0.568797
0.791248
0.328059
0.0207345
0.223444
0.114662
1.09068
1.19547
2.33941
3.76955
3.15621
2.70396
4.40966
3.71405
2.13388
1.09007
1.75783
1.04429
0.814137
2.66962
2.58378
1.23349
1.1204
0.332433
3.11608
4.36356
2.04946
0.883114
0.466744
0.315004
0.245293
3.27677
0.653581
0.864346
0.252931
0.105995
0.83242
0.220974
0.424628
0.164303
0.653671
0.0815491
0.245604
0.0660098
0.115702
0.345163
0.128939
0.0392997
0.184225
0.27546
0.275786
0.52742
0.275065
0.696853
0.248581
2.77503
1.69886
2.98331
6.72219
6.87455
4.01272
6.52829
8.46636
2.15956
4.74638
3.32916
1.1572
0.931792
2.19251
2.31162
2.37398
1.57914
0.826362
0.096064
0.562597
0.992878
1.04313
0.391528
0.172832
0.162333
0.580037
0.993016
0.764046
4.23312
6.00783
3.93873
1.52331
1.77766
2.24876
3.96438
0.409498
0.154461
0.225815
0.669464
0.772782
0.383229
0.33689
0.151887
0.174191
0.432626
0.431265
0.207092
0.736015
0.64949
0.322949
0.553189
0.213152
0.142163
0.119507
0.270605
0.188305
0.349904
0.701821
0.485053
1.16678
0.430083
0.561457
0.634491
1.14105
0.905373
1.0861
0.191051
0.264361
0.40561
1.18175
0.122929
0.881644
1.50985
0.606826
0.753203
0.457775
0.461394
1.05639
0.391562
0.490668
0.68515
0.533568
1.27684
1.48322
0.307909
1.39544
0.384627
1.13159
0.733097
0.0866624
1.15967
1.02029
1.45351
0.738045
1.3641
0.219215
1.43185
1.45964
0.33207
0.244443
1.31369
0.853729
1.84415
1.60386
0.740993
0.637229
1.10051
3.04986
7.19178
7.31767
3.65958
5.52181
2.25531
0.50602
1.99032
2.10088
1.194
0.744491
0.916065
0.642458
1.78063
0.341889
0.299966
0.455866
0.392335
0.192144
0.196933
2.42762
0.202476
0.492652
0.436819
1.31324
1.7333
0.847491
1.18662
0.355542
0.939081
3.16323
1.56759
0.271196
2.18524
1.36121
1.32132
1.28886
1.95259
6.80998
7.69057
2.13424
1.31594
1.01003
1.5575
1.84744
0.657186
0.429913
2.86545
7.69176
9.18077
7.34072
8.45412
7.31248
7.50552
5.13834
4.88981
3.47031
7.12089
5.63019
1.80064
0.27203
1.35325
4.20888
0.775385
1.81499
1.45307
1.16905
0.878663
0.927767
0.35688
0.832525
1.56048
1.73726
0.953494
0.489196
0.711764
1.55581
1.17361
0.492293
0.209367
0.36326
0.243026
0.502104
5.20608
1.17974
0.286626
0.369781
0.35542
0.301327
0.175486
0.0898273
0.18966
1.34394
1.23823
0.906393
0.0571824
0.990213
0.12135
0.152509
0.60499
0.941956
3.21265
0.964695
0.488551
0.148712
0.223146
0.354195
0.123355
0.0967777
0.437367
1.14604
1.51995
2.13818
1.43944
2.51975
2.16262
2.36289
3.84348
9.93314
5.33635
7.62461
8.79522
7.544
9.58144
7.17646
5.2527
4.29917
3.79061
1.40473
0.849194
0.764253
0.273816
0.457662
0.278016
0.25787
0.40834
0.96135
0.675046
4.45062
1.1733
0.947485
0.704227
6.33793
2.26131
0.38357
4.32135
0.562704
0.332933
1.04834
3.03648
3.2315
1.20348
2.72135
2.70192
0.788336
1.37171
1.47053
0.524798
0.0974132
0.155571
0.350357
1.33787
1.47092
5.1016
10.1735
6.88554
7.26127
8.73928
7.31382
12.2316
8.35878
8.874
6.56566
3.94651
7.7596
11.7505
8.8589
0.864095
0.607705
0.800597
1.02555
1.348
2.38976
5.39423
8.04846
4.80021
8.37313
4.75548
3.22739
1.71128
0.498643
0.423186
0.0823816
0.917768
0.901807
0.821943
1.6072
1.6761
0.972403
1.86847
1.74471
1.29581
0.654041
1.02083
0.241199
0.615047
0.597278
1.47334
0.566839
0.686064
0.666995
1.48273
0.889528
1.48329
0.154899
0.935786
1.71283
0.492551
4.31137
1.40038
1.09266
3.94029
1.71967
0.504231
0.337003
4.0905
2.70499
0.515579
0.450725
1.20412
0.789359
1.07317
1.99225
0.949252
0.307216
0.130328
0.13734
0.572411
3.00726
7.86303
5.92652
7.12998
8.67396
10.3557
9.55339
9.50476
7.43771
11.2151
7.15383
6.67894
6.40016
6.76738
5.21709
4.26583
4.21051
0.832628
2.70808
1.0904
2.76494
3.23342
1.21802
0.810289
0.787443
0.605125
0.722683
0.294945
0.628871
2.59359
0.333752
1.18519
2.47063
1.45122
3.12355
3.45844
2.08541
1.21028
1.00827
2.34188
1.15906
5.99471
7.33405
8.9599
14.197
12.4053
10.2481
9.77728
7.47548
7.63714
9.4621
4.88277
2.60016
1.73353
1.11306
0.17287
1.16469
4.52194
6.18224
6.04099
6.52353
3.48281
3.30571
0.375425
0.2702
0.391976
0.523603
0.128978
1.15265
1.02745
1.87623
1.38648
3.14285
0.680406
2.34566
1.7036
0.315214
0.972414
0.695242
1.91657
1.03935
0.706651
0.617788
0.718481
0.974754
1.72302
1.66472
5.26591
5.44767
3.92743
0.912654
1.10461
0.767725
0.285772
1.46071
7.61757
8.39199
8.16829
10.1854
9.4078
5.95293
8.30023
6.52001
4.13874
1.67361
2.39569
4.1968
6.85639
0.724195
0.407002
4.95115
1.21424
2.84249
7.11525
5.54653
7.36544
10.2347
8.41794
9.92819
5.82279
1.02812
1.33924
3.2567
2.50699
3.77013
1.65682
2.59583
0.179714
1.20061
0.0621178
2.86389
4.17898
5.00339
1.82291
1.31555
4.55885
1.05036
1.32768
1.49206
0.360032
1.6893
6.01288
0.651211
0.382774
3.96086
3.00751
0.760192
4.12494
1.55341
2.55489
0.953531
0.708928
2.18123
15.1989
1.03784
0.637029
5.17624
1.83868
1.29398
1.92164
4.45674
4.24232
2.73694
2.75835
4.20133
4.00209
5.89051
1.78674
4.76002
0.202068
3.53436
0.108729
1.81657
0.555463
1.43132
6.5565
8.11802
9.5004
9.8874
5.3294
7.07076
4.60278
2.41629
0.572973
0.31621
2.79865
1.16329
0.692207
0.571545
0.816078
0.828535
4.71958
1.05056
2.28764
6.47644
4.32703
3.31453
8.59419
6.95044
4.90285
4.04683
5.75482
4.82805
6.27026
4.17946
0.627225
3.5435
2.65747
2.03141
0.169277
0.169708
0.225858
0.317727
0.271583
0.199494
0.30783
1.44499
0.0568469
4.64436
0.334919
1.63225
1.41606
0.991114
1.0698
5.28886
3.85173
3.56978
1.37833
2.52007
1.25492
1.93354
1.02759
5.88034
0.621097
4.28601
0.43394
1.41493
0.218417
0.167097
0.273155
2.58605
1.38978
3.28967
1.0579
1.34864
0.329568
0.406138
0.238944
5.56526
0.931429
2.11487
0.30867
2.35194
0.38756
[truncated: 9,937 more rows]

## Sheet: Mouse 7_Velocity
0
0.249242
1.19828
2.29108
0.146251
0.141542
1.02247
1.73032
0.253465
0.78307
0.868296
4.15167
7.96789
7.3131
8.53574
10.3362
8.95129
7.83725
1.84447
1.9416
1.63234
1.55411
0.26382
0.688296
0.076899
0.443762
0.623807
0.458131
1.70828
3.61655
3.0178
6.89059
8.21192
8.09755
7.40197
5.89175
6.16558
5.57252
1.21466
1.97336
0.569967
0.414725
0.523955
1.14282
7.04935
9.10425
11.3094
15.1856
13.986
14.0728
13.9644
10.7443
10.2838
7.68548
9.78148
5.60422
4.0744
2.30057
2.98355
2.43756
5.24178
3.2786
2.92417
3.61718
2.09181
0.985539
1.22587
0.424377
0.544374
0.902342
0.901622
0.923929
1.26312
1.15512
1.51912
0.959601
2.35678
2.07616
0.22096
0.530419
1.9468
9.58422
10.8851
8.80051
7.47041
2.64477
2.91022
2.67105
2.02584
1.15728
2.17188
0.493074
1.71656
3.69082
8.95646
7.93468
5.42067
2.10403
2.00773
0.657431
1.36348
1.42982
0.377636
1.98255
3.91897
7.47752
7.56684
5.91352
5.22309
1.03959
0.377069
1.97578
1.09916
4.02037
4.3392
3.75491
3.15101
3.05821
1.61531
1.34674
1.69886
1.67801
2.96679
4.79509
3.9883
0.562702
0.302602
1.96136
1.9192
2.46393
3.17546
6.00659
6.61211
4.40096
4.61391
5.00433
4.60235
3.29598
3.34555
6.11846
6.07393
9.64043
9.8053
8.35852
9.46472
10.3787
7.70284
8.46376
10.0711
11.9511
8.97177
9.93003
9.11911
12.1435
8.45907
6.34891
6.15561
5.93758
4.76055
3.97614
1.53986
2.09799
0.881226
2.36369
1.46981
1.67442
5.00819
0.0709628
0.0974125
0.320813
0.475477
0.403315
0.234441
0.348431
0.584637
0.990601
0.547284
6.08707
0.705459
1.4533
0.225665
2.9243
2.35255
4.08786
2.3529
2.64996
1.61318
1.06927
2.07022
1.06883
2.02113
0.650729
1.02119
4.08483
0.96857
1.00985
1.83006
1.30404
2.10591
1.26903
0.47099
0.918918
0.407337
1.08238
1.30558
0.33692
0.842633
0.890178
1.36983
0.635415
3.83638
0.25131
0.798182
0.984913
0.349774
1.0246
1.06646
1.35088
1.18992
0.274399
1.06712
0.698704
1.43735
0.61957
0.448945
0.27318
1.26433
0.441781
0.656955
0.152771
0.910737
0.958348
1.66531
2.76627
4.24585
6.5786
8.31965
9.10355
9.32879
11.4162
11.3309
8.25364
5.76105
9.36634
8.58302
6.23844
0.699914
1.26423
0.478173
0.78608
1.21882
0.638791
1.98679
3.85301
2.4433
4.05897
7.09434
8.28433
8.67587
7.55171
13.4662
11.7447
12.5003
11.2817
9.72486
8.33199
13.0129
10.8788
11.4844
8.17976
5.64902
5.87394
3.65189
0.600724
1.31948
0.400903
0.424922
0.488084
0.653677
0.108896
0.299228
0.951161
0.500044
0.442223
0.182386
0.835858
0.905381
0.35204
0.640762
0.415223
0.307521
1.25025
0.528858
0.456731
1.79259
0.725733
1.66471
1.48246
0.518793
0.357109
0.119786
0.783375
0.443304
0.122043
0.239247
0.965618
0.338892
0.869858
0.701537
1.5118
0.208977
2.25987
2.80037
5.04104
7.73472
9.62759
11.0525
9.81511
10.7053
8.00938
3.75755
4.14821
6.02872
7.42322
4.42115
0.763321
0.662317
0.540567
2.05101
3.73356
5.79006
8.78013
9.00714
9.26832
4.99074
4.34824
3.47104
3.72361
1.92466
1.48727
0.172374
0.54037
1.34492
0.536932
0.272849
0.95629
0.434476
0.943856
2.55152
4.55898
8.42808
10.2328
10.5837
8.69644
10.2088
11.0388
9.54609
9.00378
7.28461
7.62768
5.44863
3.89004
5.98931
7.19878
7.53112
9.67072
9.59174
10.4938
9.2512
11.7231
14.008
12.5027
9.75837
8.5028
5.64423
7.49
5.25837
0.456925
0.806488
0.232914
0.568539
1.70357
1.22257
1.09835
0.479623
0.416704
0.532927
0.0557983
0.0290178
2.17799
3.15029
1.01654
1.01872
1.57118
3.82282
6.61921
8.52532
6.69
2.68332
1.01793
4.39374
7.24075
8.36121
5.26992
5.11622
4.46511
7.69286
7.81571
0.78587
1.11157
1.79149
6.06891
8.86515
11.0462
10.4902
10.9341
11.6282
11.3752
9.85158
8.45105
6.79198
4.73552
5.01988
5.66796
7.27312
2.2505
1.01366
1.54991
0.599529
0.176287
0.38342
0.188637
0.106414
0.58412
0.763698
2.20059
1.7032
2.66065
6.39788
5.03033
4.39842
2.46835
5.29442
6.72327
6.90125
7.90335
5.63934
5.2496
6.21961
7.02341
6.37783
8.51932
7.47309
5.4639
4.26026
3.87926
0.616813
1.71346
2.95467
2.1392
2.13994
2.2456
1.46351
0.666481
0.854975
0.609133
0.842524
0.458517
1.46902
1.86643
4.76959
6.45348
7.71828
5.0623
4.97887
6.60255
6.93942
9.56384
11.4048
11.4256
11.1959
12.8348
7.07859
7.65687
5.98013
7.46712
6.6806
9.18102
7.02946
4.03976
1.90276
3.6282
7.67896
5.63621
4.28615
6.36331
9.39643
11.5153
10.8822
8.10116
5.91061
8.7002
7.48348
6.0901
2.89967
2.09447
0.170741
0.0944339
1.00011
0.899484
0.878952
0.406996
0.380657
0.20742
0.927723
1.80176
2.4402
0.116507
0.191301
0.0639448
0.171345
1.1205
1.44688
0.0713819
0.066178
1.90411
2.61439
2.08907
5.43552
8.96227
8.6029
6.88826
3.83025
5.21085
6.31719
10.1081
9.25469
8.98354
7.54223
4.58311
2.82702
2.40908
3.85578
3.17858
9.81308
11.8045
8.95914
7.3699
3.40221
1.80457
1.24782
3.55048
1.04758
0.365235
1.32527
1.57086
7.89433
6.77297
2.48394
0.442072
0.761964
0.177538
0.165777
0.379051
0.323565
0.584347
0.922198
1.10645
3.78708
6.69369
2.16893
0.629503
2.94579
0.850865
2.51744
0.266448
1.31152
0.369888
0.54675
0.71844
0.34927
0.194491
0.702404
1.40697
0.461696
0.878908
1.52183
0.629562
0.112364
0.210244
0.886154
0.238705
0.476809
0.905948
0.195847
0.529617
0.476371
0.534868
0.516097
0.16516
0.379594
0.529352
0.453492
0.786706
0.451192
0.784404
0.630012
0.539504
0.7222
0.754392
1.08108
1.41023
0.636193
1.36849
0.197223
1.38982
1.82014
1.31635
0.731178
0.80898
0.19572
0.193588
0.498202
0.332758
0.543775
0.194657
0.434265
0.716179
0.449581
1.1403
0.432506
2.50036
1.66523
1.02287
0.411414
0.636833
1.32618
0.386156
2.06046
2.19871
4.57109
2.59423
1.95881
2.7256
1.72643
1.19034
2.16939
3.65552
0.923381
3.67448
0.938377
0.0793261
0.1986
0.117691
0.36566
0.240536
1.28055
1.73066
0.0547272
0.78373
1.33764
1.25158
0.736366
1.24332
0.725893
1.95744
2.74509
3.92896
3.10704
3.7498
2.44883
2.28643
2.73768
1.06183
0.935052
0.639072
0.460035
3.44938
1.29075
0.101638
1.35895
1.53129
1.75974
2.04461
3.29958
3.15527
1.26934
0.624813
0.0453596
0.33469
0.994105
1.53436
2.28428
1.39978
1.30471
3.16404
0.104887
0.73582
1.16267
0.609009
1.06427
1.93776
0.462215
0.703341
0.712613
1.18583
1.56147
1.68625
1.18245
1.23862
0.25807
1.41898
0.643238
1.36269
1.98617
2.10078
2.77188
3.53147
2.81761
1.28867
2.3789
1.00197
0.621754
0.560117
1.16941
1.6563
1.78446
1.40831
1.72455
2.81439
6.43905
8.08193
6.59339
8.83759
7.29774
6.02945
4.41462
0.400337
0.644099
0.188619
0.950046
1.13584
1.71947
3.07108
6.69081
6.91085
6.81889
6.77639
6.9942
6.60187
3.98921
3.33771
3.42357
2.97477
3.43938
2.3086
5.34183
6.02812
5.07766
4.16015
4.00679
7.14211
8.7458
8.97889
6.15587
3.93956
0.900269
0.485822
0.107099
0.355246
0.365822
1.36579
1.38094
2.01686
1.42208
0.855898
0.55934
0.689453
1.74791
3.41654
6.65406
8.76882
8.90849
8.76182
7.939
5.7924
4.50889
8.27145
8.23737
6.77377
6.87269
1.86008
3.4879
5.63127
3.30765
2.80174
3.18166
4.50397
9.23488
6.89719
9.41888
9.32297
7.00862
5.61538
4.52577
3.75984
2.86051
1.2324
2.33234
4.1478
5.34493
5.03205
6.83479
6.88337
9.35412
7.84015
7.05198
5.97525
3.8718
1.79158
0.449544
1.06294
1.08505
0.956298
0.864637
0.329336
0.196971
1.03566
0.426581
1.04839
2.05768
1.04207
0.30891
1.03428
1.12259
0.840314
3.7782
4.20025
2.20579
0.39534
2.37312
0.370011
1.01314
0.813232
0.760356
8.22402
0.958055
1.01302
1.69593
2.35922
1.03889
0.74545
0.525218
0.296438
0.916455
1.32752
2.35974
0.491403
1.29559
0.721192
2.04106
2.17696
1.0108
0.61759
0.64653
0.280155
0.528411
1.21295
0.55305
0.139289
0.780632
2.68334
3.8573
4.02235
7.98236
6.3425
6.5207
5.85577
4.98239
0.670126
0.997227
0.627908
1.14519
3.87424
2.66081
4.17773
6.30039
9.00958
9.94947
12.2758
12.108
10.7388
10.4044
7.37882
6.52285
7.11415
5.89523
9.43128
7.28807
7.15714
7.40408
3.33576
1.08259
0.292344
0.92256
0.990225
1.18479
2.04611
0.698465
1.40558
1.02999
16.3349
3.21817
1.02402
0.588456
0.569524
0.745526
0.79125
0.982627
0.882223
1.17118
1.20128
0.472046
0.398073
1.26427
0.595876
0.914506
0.366617
1.27225
0.710879
0.758269
0.279658
0.940154
0.0994619
0.565154
0.124379
0.591104
0.784982
0.615478
0.541062
0.357902
2.32692
5.03291
5.70785
4.82261
6.76474
7.95231
8.32194
8.15111
7.18088
5.55929
3.74794
3.00456
1.37977
0.806095
2.91106
7.81009
10.7202
12.1692
13.2054
12.1133
13.7657
7.68187
8.43593
8.43909
8.06208
4.51234
6.4892
7.09996
4.85796
3.33818
1.74481
7.77482
0.680452
1.76208
3.25506
3.38667
0.873177
0.678606
0.635975
0.436061
1.22313
0.939829
1.35126
0.505939
0.301643
0.0725878
1.30116
1.45797
3.0396
5.65995
3.23987
2.90911
4.58795
6.46058
3.49294
5.5371
8.72353
6.70678
8.69288
6.45376
7.02608
4.95526
4.17426
3.15077
6.29129
8.91883
9.01917
8.20766
5.68162
0.917523
0.761152
1.79883
1.89262
0.643593
1.63973
7.24933
11.888
11.6412
11.8107
11.3366
12.9696
9.29083
6.50563
10.1461
5.63438
7.37866
4.85292
4.12105
1.31109
0.528434
4.03633
1.24316
1.57863
2.48305
6.18912
9.46134
6.71073
7.66218
7.95638
10.546
9.24697
8.33274
7.18325
10.6694
8.27325
6.21533
4.0424
1.73641
1.86261
3.17039
2.38739
0.938002
0.952263
1.19302
0.953126
1.41701
2.02366
4.46665
2.1793
3.2976
7.65009
7.37079
7.70929
8.42415
9.96522
10.8446
9.88852
11.5812
9.40258
9.83164
9.40435
7.61533
4.74139
6.97101
10.7117
7.35617
8.89817
4.5899
6.02173
7.62067
8.65168
9.20907
9.05426
6.99641
6.03921
6.21659
6.44704
2.83939
1.90147
3.41739
1.4662
3.10741
1.90662
1.30914
0.650826
2.19362
1.61712
1.86027
1.52102
3.47125
4.97786
1.61749
2.72965
1.8435
1.48957
1.74294
1.20485
1.41323
1.19304
3.16714
3.85761
6.09266
7.18834
9.37082
12.2235
16.7695
15.5616
16.364
14.5248
12.6776
12.659
9.54575
8.49722
7.08383
6.25415
3.26411
1.53798
3.267
4.80614
6.08689
3.02908
2.13984
0.52242
0.35215
1.71132
1.61646
2.20197
3.36012
1.58752
0.468575
0.849588
0.646042
1.20858
1.88028
2.72436
7.15202
8.31058
6.64548
9.40901
6.91414
9.23727
7.06317
5.63972
6.26981
6.42202
10.5045
7.98512
7.3471
6.79966
1.32275
2.94818
0.327438
1.82227
0.695158
0.774408
0.212487
0.292341
0.33089
0.576926
0.188397
1.0684
0.199617
0.246635
1.42201
0.432124
1.03231
0.434243
1.13076
1.60094
1.26723
0.636842
0.351425
0.508127
1.42729
3.05239
2.84224
3.49907
2.442
5.58721
3.96743
3.24286
6.65696
7.18067
10.8659
10.9385
9.32536
9.4867
8.81352
10.0518
12.2126
11.7408
8.13905
6.27303
6.74638
1.7834
3.07011
3.59666
3.8674
0.666636
2.14223
1.25688
1.28993
0.651354
0.540926
1.30051
1.32156
0.788551
1.57006
4.47388
8.39794
4.14392
4.36129
4.13764
0.596087
1.41821
6.03086
4.90821
4.89922
1.3459
2.11673
3.18139
3.08918
1.59923
2.75779
8.66039
6.63809
3.29381
3.80144
3.02508
2.3241
0.532789
0.751602
2.82087
8.0915
5.50456
4.33053
8.06559
6.44672
3.43066
0.426188
0.806273
3.44931
5.95857
4.14945
2.78251
3.91602
4.7438
8.52528
5.639
5.91019
3.62877
3.58799
1.54581
0.400607
1.80064
2.13265
1.20932
1.60988
1.4168
3.01168
1.72255
1.12993
4.54691
1.11337
0.468605
0.556681
0.554437
0.918388
0.654405
0.215556
0.0926048
0.313948
0.221618
0.876615
0.149669
0.219992
0.140465
0.52198
4.43933
8.172
8.74823
12.5416
10.651
15.2157
13.9104
12.4528
14.2058
10.4672
11.8798
10.5696
9.58712
8.02221
2.19653
0.452813
1.33189
0.427214
2.52804
6.12513
8.99674
7.85217
11.0394
10.2209
7.93754
5.91888
10.584
9.23331
10.1534
5.51894
1.77879
1.34977
1.34238
0.818831
0.457649
0.98026
0.439717
0.948525
1.88728
1.55672
1.92632
2.86939
3.57246
3.53486
5.04023
6.97477
5.70996
6.62442
1.34531
5.23622
7.23763
5.81676
9.76341
5.75139
7.20457
6.75522
5.66649
4.98527
7.0788
7.46845
10.4371
8.30304
7.61639
5.22653
4.40329
6.0947
4.86049
6.23508
4.69506
7.6955
5.94416
6.12237
5.82317
1.14093
1.10429
1.813
1.43465
0.664336
1.81581
1.13448
1.11434
0.574539
0.119443
2.39506
0.361459
0.418723
0.161279
0.36261
0.72755
0.486047
1.38536
0.925154
3.96631
0.120178
2.32896
2.92187
1.13959
3.69093
2.91235
2.94129
2.96728
2.76021
9.00304
7.76017
7.73392
10.6563
8.14007
9.81662
8.63567
5.34823
6.78626
4.21575
5.8764
3.84378
1.36962
1.13677
2.21195
3.10018
4.93556
5.99259
8.77691
8.83251
8.0349
1.56211
1.46017
1.7086
0.558745
0.132565
0.435209
0.279795
0.563485
0.485284
0.15504
0.120789
0.587397
0.754716
0.70805
1.02516
0.865798
2.02089
1.54716
2.00744
0.0744892
0.457612
2.08133
1.55615
1.40459
3.14484
7.72335
9.14127
7.74614
9.84239
9.9874
8.82305
7.61791
4.74696
2.12012
3.63779
3.67713
4.86503
7.91253
8.12107
7.10474
7.74778
1.01714
0.315525
0.558543
1.02042
2.21848
2.95256
2.49848
5.83538
7.11288
1.54266
0.748749
0.697589
5.28331
8.10937
10.3366
9.1621
13.9745
11.0594
10.62
5.50371
3.99528
3.1985
0.420657
1.60842
2.11576
3.12061
3.25847
4.1149
1.73404
0.764233
4.80235
5.13465
5.98673
5.79902
4.26739
3.47891
1.37249
1.93091
3.09583
4.61509
1.25947
3.92821
1.27612
0.209798
0.629341
0.529196
2.03136
2.62792
2.21019
4.7933
1.2405
2.46086
4.04815
6.21111
11.743
9.94605
9.16479
8.42875
6.14588
5.92548
3.90794
3.76043
1.09935
3.99868
2.75541
4.89889
7.50896
5.91934
6.81034
2.94427
1.70645
0.83458
1.23887
4.26355
3.1864
2.18632
2.43055
1.41005
2.66363
1.59985
0.975821
0.757399
0.801074
0.896466
0.312671
0.724972
1.27721
0.699801
0.953083
0.339978
2.17514
0.118688
3.48136
4.91053
1.23496
0.123817
2.26229
0.886997
1.38509
0.69066
1.52078
1.33447
1.03682
0.386238
0.318185
0.49648
0.181693
0.403126
0.0517244
5.45131
0.955937
0.747754
0.705547
0.110156
0.377109
0.479126
0.66901
3.10642
0.687014
0.290856
0.6087
0.0874615
0.989658
0.253776
0.305047
0.178466
1.30616
2.07774
0.513514
0.808711
2.09036
0.880264
1.54826
0.460844
1.18083
0.979137
1.68909
1.6436
0.221182
0.751056
0.845454
1.15708
1.07032
0.461512
0.233285
0.660225
0.299676
0.286109
0.0873722
1.26217
0.196472
0.180994
0.144973
1.55754
1.39872
3.38158
0.460117
1.073
0.230491
4.60445
0.587194
1.65306
2.4417
3.71
1.35323
1.58169
2.91686
0.940175
2.51597
4.11782
4.78919
6.4156
5.37358
6.2956
5.73997
5.0005
7.63808
5.47317
5.45194
8.96715
7.13643
6.7224
10.0649
7.20054
5.95618
2.50372
2.38631
1.99757
2.98064
2.32888
2.88558
4.30857
4.90038
4.77239
4.26223
8.01845
10.4682
9.41902
12.04
9.06923
10.0422
8.23644
7.98968
5.10271
5.74237
4.20575
1.29016
0.488107
1.41643
0.861901
1.16136
0.275514
0.700785
0.650841
0.633651
0.225509
1.21061
1.5857
1.68462
1.74829
2.14973
1.65219
3.76821
2.03941
3.08009
8.63366
5.85131
7.31763
6.40044
8.92059
7.84546
7.08392
2.72325
0.704915
0.358712
0.404026
0.593009
0.285863
0.129931
0.55191
0.285102
0.571969
0.454405
0.316931
0.244851
0.140321
0.407472
0.726823
0.234512
0.0611499
0.951884
1.8191
2.22553
2.10869
1.86069
6.31027
9.61504
5.34306
11.9832
10.8404
10.945
7.17621
4.26197
5.5891
5.23142
5.08543
8.47311
5.25003
3.22914
1.7858
2.09519
4.58131
0.435404
3.77876
2.49063
3.01832
8.59574
9.66676
12.2213
8.25883
5.35089
0.542485
0.327627
1.72206
5.39075
6.93811
9.01705
10.4737
9.92348
7.68031
6.54701
5.50778
7.53516
8.1161
4.3706
2.29972
2.76055
2.27669
3.34537
4.46775
4.76093
5.05539
1.98203
1.01407
0.530106
0.651496
1.195
0.378052
0.50305
0.415282
0.474886
5.55066
5.69343
3.57071
5.05589
4.35961
4.07423
5.01461
6.11794
5.25787
3.40508
3.46493
3.6199
2.43167
1.87445
0.979943
0.406177
0.403327
0.244596
1.06083
1.02633
0.270706
1.03096
2.17733
4.23023
0.614436
0.298802
0.0626753
2.3521
3.15194
7.84039
11.4024
10.1902
9.0757
4.30183
4.02287
3.58627
8.4985
9.88452
9.87192
8.06415
5.11663
4.61212
3.15755
3.19537
3.55137
2.46754
2.30334
2.25509
7.81241
7.41298
5.10623
4.66358
7.83101
10.1983
9.41496
6.19227
4.68672
2.71413
2.85597
2.75102
3.85968
4.70443
3.53606
4.03554
7.74169
5.02754
4.45375
2.21457
1.51937
0.746338
0.790764
1.87742
2.19224
2.46147
3.66157
2.75279
4.18392
6.60133
0.813778
1.08882
1.08024
1.87434
1.20569
2.76301
1.82097
1.201
1.61428
2.24433
3.06714
4.38443
3.24464
1.09891
0.334859
2.19713
1.04682
1.35749
3.35531
4.61233
6.18112
2.81629
3.45756
3.8569
1.34691
3.02441
1.55164
5.01636
6.46618
2.80203
1.63887
1.22487
0.560852
2.22614
2.23024
3.65955
4.13938
4.58243
4.14775
1.13785
1.54799
0.305976
1.17769
0.838283
0.229369
0.501176
0.0900327
0.734371
0.379288
0.957196
1.85661
2.43706
5.74594
7.98671
1.99884
1.43622
1.53567
0.316846
1.69243
1.89112
3.88694
4.39513
5.17302
2.96758
0.840708
2.9599
6.40164
8.08299
7.85724
10.5167
6.71464
4.10877
2.67909
2.46877
6.01592
5.64693
4.69877
4.02085
1.5157
1.48459
1.0174
0.0861469
0.121772
0.326256
0.125182
0.289575
0.200093
0.0632228
0.321075
0.998209
0.180272
0.280361
0.635727
0.512007
0.189232
0.0862085
0.111357
0.0973258
0.539002
0.273982
0.0762377
1.67412
1.2956
1.8879
2.80073
4.75247
5.52619
7.61927
6.88849
3.34349
6.15965
4.02614
1.42437
0.662483
1.29295
1.25141
0.8217
0.903983
1.37992
0.96615
3.32749
0.341303
0.106265
1.42349
3.06995
0.916928
1.79288
1.80818
1.18361
3.01601
4.13878
6.99614
5.43076
2.81348
4.04145
2.81755
0.669612
1.85793
1.47756
0.838405
0.282113
1.4449
3.60495
7.72851
6.79803
5.32532
6.7919
7.15268
9.26949
4.32581
5.71509
4.56941
2.49315
4.23597
3.10707
4.72308
11.732
9.5843
[truncated: 9,937 more rows]

## Sheet: Mouse 8_Velocity
0
2.14519
5.34272
8.52411
5.8098
8.27237
6.13119
5.12771
2.91892
1.80539
3.40073
2.40443
5.89364
6.27728
6.68748
6.74445
7.76164
8.67159
2.61066
1.27421
3.53331
1.76087
0.134816
0.913094
0.182604
1.63693
0.522158
1.33725
3.11752
6.08246
7.10235
7.6327
9.04653
7.53969
9.10535
7.86083
5.23007
4.82041
4.69009
3.77095
1.50038
1.796
1.44473
1.20274
1.13897
4.69612
0.587177
1.29774
1.68332
0.476712
0.290525
0.134826
0.420812
0.162226
0.408111
1.69366
1.61023
0.108886
0.316591
0.155831
2.12768
0.184968
0.223394
0.162352
0.501814
0.12329
1.28042
4.40438
7.47292
7.63355
4.7931
1.6334
2.00529
4.27715
9.01963
10.487
10.7864
10.2512
10.8306
12.1818
12.2201
13.4321
10.5842
12.0041
10.4118
9.25843
6.77109
7.77208
7.0579
4.76007
5.02637
4.55231
5.31339
0.693436
0.351833
0.260214
0.249363
1.61767
2.42082
4.68472
4.1867
1.33975
1.20519
0.308746
0.171152
0.231105
0.205711
1.38723
0.152581
0.189186
0.801037
0.117814
1.36944
0.534269
1.10647
2.37753
5.29687
1.65333
1.44087
0.713328
0.527832
0.258605
0.353815
3.74654
0.954801
5.62084
6.78945
8.63061
7.795
9.72217
6.3888
2.05913
1.26743
1.93141
1.3622
1.19756
0.477819
1.37282
3.06643
5.05454
2.74363
5.4916
5.68298
5.63497
3.21012
5.13784
4.91093
5.56051
5.06999
4.61678
1.6848
1.87977
1.31756
1.39355
4.54375
6.14233
7.59396
8.06099
9.17434
6.92243
7.09055
5.80157
4.12454
3.7299
8.92125
9.65673
8.76309
4.59293
4.20007
1.59126
3.66803
0.678604
0.802885
0.432373
0.359877
1.06337
0.239691
0.884975
1.97821
1.45226
0.489464
1.69462
0.498073
0.354339
0.359252
1.6992
3.82756
5.04579
0.800209
2.04881
3.0292
4.55689
4.05316
0.701803
2.02713
2.84638
2.00311
1.95
3.09986
2.04236
3.76122
2.59703
0.201435
0.886031
4.7469
1.64148
0.425166
0.992463
1.75374
2.02027
0.0345783
1.40761
3.01476
5.40208
6.06172
10.2932
11.666
10.6993
9.34573
7.53159
4.52583
0.913916
0.760522
1.27772
0.833672
6.49285
10.218
6.91862
9.12501
6.42677
4.58193
5.18045
5.01388
3.04396
5.76589
4.49589
3.28434
1.92085
4.8443
1.5455
4.29422
1.98131
0.922136
4.7559
1.5249
0.916359
0.389143
0.368073
1.42798
0.290925
1.05405
2.61611
5.35741
5.99087
2.02886
4.42875
4.32496
4.7405
4.74191
6.15754
4.06275
3.07022
1.84073
1.52779
0.96244
0.740773
0.36948
2.34968
5.0805
7.22118
8.67013
11.362
10.339
6.96365
7.26301
8.89865
5.53022
4.03663
5.57208
1.293
1.61223
1.00493
1.00794
1.02213
3.42204
6.22868
10.0716
10.7825
12.8783
9.7784
8.94259
8.52278
10.9825
10.0884
8.89192
9.85876
9.93384
9.64493
8.42618
5.66412
2.43107
2.34953
2.3493
6.14995
8.11951
5.1024
5.30878
6.70694
5.14868
8.31108
9.88594
4.05371
5.71569
7.77511
3.14901
4.23286
3.91663
1.79779
0.114686
1.18673
0.527603
3.04838
4.20747
9.27483
5.99962
7.11158
5.28753
1.31128
1.22713
0.902737
0.346766
0.681209
0.180271
0.431408
0.210034
0.0683824
0.08788
0.125735
0.0443617
0.373105
0.0926604
0.448161
0.413211
0.440387
1.18339
0.156487
1.16223
0.0808801
0.418153
0.513321
0.59369
1.12562
0.846236
2.19447
3.58314
8.75881
9.47009
6.31326
6.54099
9.48604
10.2275
10.5742
12.4429
8.26694
7.03271
5.55162
5.11009
5.44365
5.31052
5.89157
6.04208
7.55673
7.57124
5.64701
6.57063
4.86774
3.51504
0.259707
0.856121
2.51222
4.20675
4.69234
2.90528
2.93605
1.30418
1.90796
2.2318
4.77814
6.42801
6.12025
6.40493
3.76409
3.29829
4.46263
1.95068
1.75443
1.52489
3.29751
2.68772
5.34186
5.36185
8.54807
9.3044
4.66838
6.15484
6.33603
0.321692
0.75615
0.638033
0.624299
1.15861
6.7652
9.04583
5.31045
3.19762
6.15939
4.36103
2.06028
2.69258
1.71393
1.22285
2.65831
3.50655
0.262149
0.169446
3.44322
0.780915
3.05705
1.4341
0.447039
0.51233
0.833528
2.01707
4.81775
5.61878
1.41513
0.799177
1.90465
2.74449
3.02963
1.22058
1.10651
1.64498
4.82311
6.45817
2.37391
3.28358
7.24622
8.02647
6.14415
2.46594
2.98065
3.77514
0.999233
0.94809
0.127159
1.18484
0.728751
2.84509
5.76311
10.9839
6.43039
7.27348
6.41243
3.05589
2.20803
0.717291
0.279404
2.40077
2.63874
1.47007
0.133243
0.345736
0.131443
0.0987081
0.462974
0.184552
0.290989
0.419127
0.362612
0.184884
0.233145
0.162617
0.267793
0.727343
0.133704
0.348901
0.159608
0.0527195
0.352166
0.482904
0.134158
0.374187
0.0572385
0.306901
3.28314
0.310525
0.298854
2.50576
3.70931
0.226538
0.635416
0.185338
0.0413449
3.46608
3.14968
3.90773
5.72499
1.6187
0.292811
1.27519
0.883328
0.933235
0.319231
2.99882
3.15519
7.87768
3.6791
3.73872
1.76513
0.959584
2.10553
1.06644
1.49685
0.570105
1.44985
1.52823
6.62628
8.37193
5.06797
7.88447
8.63768
6.86174
5.63164
4.86912
2.1951
1.23598
2.13268
4.11856
7.2391
6.96235
7.28825
6.70125
6.45125
5.48019
3.4108
0.718664
0.84806
1.63519
5.15305
4.71325
0.595431
0.453091
0.547648
0.270018
0.375158
0.135477
3.34027
5.76523
1.80195
1.49724
5.29888
1.46438
3.21052
2.3597
0.698669
1.86244
2.1184
1.52009
1.46505
1.32151
7.12257
7.56642
7.13009
5.84327
2.93941
3.83289
5.49444
8.51614
6.27118
8.17228
8.49517
8.24484
9.07597
8.96354
7.82309
8.1602
7.4991
7.0139
6.64721
2.66318
1.85631
0.988103
5.01885
5.41854
0.744478
1.07235
1.73133
2.95419
1.52362
0.426731
1.45479
1.16719
0.240957
0.244229
1.58365
1.37359
3.34214
0.808291
1.66521
0.439739
1.19383
2.84899
1.82528
1.82313
1.30896
0.747344
1.10136
3.95293
2.75701
1.50854
0.8558
1.42808
0.318501
2.02159
3.05922
7.65057
9.39616
6.38272
2.32699
1.09864
0.988812
0.937329
0.332772
0.0546275
0.223137
0.457974
0.3939
0.827179
1.31988
2.29495
4.07966
4.84275
5.92662
8.71434
6.42613
2.35601
1.45249
3.80565
0.472443
3.69963
5.8457
7.64277
7.99311
5.87074
7.83827
2.15353
3.63738
9.19662
7.29857
10.3566
6.65445
6.9273
5.52268
6.09408
3.73732
6.41648
8.30594
5.85265
5.96253
3.54181
1.4447
1.1698
1.69005
1.76129
0.228278
0.320265
0.192771
0.864802
1.53461
0.719526
0.61636
0.468528
0.0108015
3.40118
2.76116
0.659847
1.15207
2.61563
4.50268
2.02566
4.54058
6.56932
7.58491
9.96894
10.5377
12.389
9.17572
9.40352
5.24633
6.7774
6.95693
5.83286
1.89212
1.27493
2.60709
1.74998
0.519015
3.37024
5.18559
0.221726
0.62443
0.508599
0.167223
0.270834
0.248298
0.744977
0.631579
0.471139
0.195472
0.367782
0.296623
0.419126
0.244708
0.62845
3.4896
2.21191
0.705887
3.77828
3.49682
1.59989
2.50418
2.86944
2.19727
0.963192
0.228366
0.495111
0.843198
1.6019
4.77341
4.64867
6.47609
9.14968
6.60243
6.79469
7.51724
3.96642
4.64955
3.07991
3.43413
7.22499
10.1833
13.4091
10.8714
9.88822
5.76883
5.83253
8.44487
8.90515
8.47083
7.84551
4.31493
5.17303
3.9313
3.04726
2.74163
4.90122
6.5696
7.21974
7.68559
9.36292
6.35438
6.62689
7.53102
5.17518
3.2596
2.07031
1.35989
3.57466
1.84762
1.26562
1.22276
2.05236
5.09274
5.93325
5.79674
6.2883
9.25861
8.24758
8.99698
8.86126
8.94083
7.36983
1.44663
2.21608
7.07044
9.46241
5.75446
1.63553
1.08194
0.238919
3.79162
0.479474
5.19854
6.51451
1.00055
2.7225
0.95107
0.277811
0.579102
0.796142
0.572492
0.798907
0.197289
0.344281
1.97227
4.27699
8.52252
5.13949
3.51435
1.37575
0.660927
0.52005
0.43615
1.43386
3.97024
0.560103
2.05631
2.7091
1.47921
4.75904
6.16031
8.50021
9.72714
8.87109
11.0399
9.36907
4.41047
4.22873
3.86444
2.0989
0.433349
0.0969424
0.686994
0.375004
0.269349
0.14128
1.40383
2.21226
5.45324
7.37168
7.26111
8.52821
10.1951
9.55984
12.6489
10.16
13.2615
10.8351
6.56448
3.80615
5.12326
1.85332
3.22804
7.88634
8.16223
8.93175
6.68708
5.46416
5.8794
4.55714
3.02086
1.82408
1.17979
2.42171
1.78408
3.99942
4.44637
6.02348
6.26153
0.822316
0.45698
1.09213
0.373069
0.238114
0.418241
0.128604
0.454959
0.207927
0.962772
0.574296
0.584207
4.75538
7.98037
8.90088
11.4192
10.3272
9.88047
11.5476
11.3994
11.3096
10.1695
10.4194
8.91377
10.4218
8.59168
8.26815
7.11998
3.86029
0.747459
0.131807
1.07495
1.24067
0.350213
0.7044
2.97051
5.3202
3.25289
3.27508
5.44364
7.89986
5.21802
4.74254
5.95316
9.31215
3.4872
4.84496
6.29359
7.66795
12.4439
11.6555
11.2373
8.63384
5.43246
9.49699
9.15546
9.01056
6.47189
7.4864
2.57859
0.742573
2.29584
0.79051
7.24591
1.41134
0.795312
0.144605
0.107762
0.32012
1.77842
1.04181
1.49493
5.23546
6.18104
2.03536
2.31407
0.725522
0.725265
0.283083
1.8425
3.46037
3.08307
2.10566
5.1271
6.53874
6.20858
5.41196
5.23792
5.10273
4.76613
2.37451
1.48798
0.183861
0.547037
0.182244
0.421085
0.483333
0.492316
0.410141
0.359157
0.596587
4.00434
5.81061
2.3183
1.26453
0.785985
1.58364
1.7243
3.07267
4.52032
5.45009
2.44362
1.62389
2.17008
2.48577
3.05099
3.08959
3.50376
8.73769
12.1096
5.33612
3.75618
5.94308
8.3247
10.4044
7.55246
8.78611
7.53605
8.74482
5.80553
10.7722
6.64162
6.81522
1.77001
4.39011
4.53168
1.74475
2.89207
0.386211
3.26177
2.52158
1.25414
6.34564
3.94979
1.29264
1.0074
1.42808
0.640212
0.129878
0.295831
1.91492
1.50553
1.21232
2.59435
1.74508
2.10875
3.90493
6.60427
7.47338
7.30864
9.30422
9.51544
6.30484
5.38772
5.52779
4.21689
7.99959
1.92917
0.645773
0.207865
1.82937
4.07372
0.861659
1.94107
5.04673
9.86072
6.83857
7.38813
8.5132
8.3114
8.07015
9.89196
10.9169
10.9142
6.5384
2.79458
0.510512
1.17924
4.25129
6.45588
0.13852
0.442955
2.8558
4.2005
1.43879
3.18454
5.58196
3.00184
0.735374
1.52046
0.762068
0.0676133
0.748189
0.981554
0.798255
0.360865
1.54882
1.28908
4.24295
6.79941
7.17073
8.14838
4.45061
3.84968
4.41018
8.65506
14.6367
13.1778
15.9652
11.2728
12.395
8.80529
9.54533
9.11792
10.8861
6.25063
4.83228
8.24105
3.32522
0.278887
1.11377
0.197946
0.281153
0.064153
0.10336
0.361116
0.358632
0.419222
1.08033
0.629408
0.987707
0.262185
0.780748
2.53607
1.2922
1.16157
0.371487
1.81277
2.36447
1.67489
2.80097
2.26658
1.19209
0.756068
0.308174
1.54244
2.25678
1.51204
4.33509
4.25866
5.46952
3.80766
5.31744
8.54342
3.61837
4.09753
5.81552
0.842514
4.30932
4.67987
2.97637
4.96352
4.86857
3.86389
3.50998
1.72814
3.75406
2.87348
3.59302
4.47435
3.31771
2.54106
3.84884
5.13757
4.98712
5.88922
4.19839
6.30205
2.8612
1.57689
3.90639
1.04813
3.65955
2.83547
0.485995
0.043913
1.85404
1.50274
0.809393
0.649662
0.197093
0.129331
0.643237
0.0841788
0.105567
2.18094
2.25546
0.430648
0.656954
3.37174
3.19861
3.23019
2.90706
1.955
0.525661
0.283947
0.247896
0.117466
0.667677
0.91149
0.542571
0.260593
0.702874
0.262778
0.0474197
0.38252
0.362522
0.33187
0.441641
0.322885
1.45208
0.402803
0.517447
1.06791
0.405923
0.0795637
0.489689
0.185652
0.3386
0.403885
0.763987
2.63403
0.086218
0.425977
0.796181
0.443973
0.464737
3.81325
0.479791
0.717134
0.187229
0.0292313
0.274965
0.195071
0.158947
1.31214
0.87116
1.67214
4.97772
9.13863
9.23962
7.30474
4.12999
0.237629
1.72203
0.84227
0.265881
0.603837
0.451535
1.94713
5.10272
6.49128
2.50264
4.9785
1.74026
0.337699
0.235022
0.0732947
2.48579
7.61624
8.62639
7.02796
8.073
5.14057
2.45972
2.47312
2.22552
0.608705
2.81498
3.54732
1.81723
5.20299
7.25097
3.60905
4.10102
5.43871
6.28729
9.96475
7.32718
0.609943
1.38482
0.429003
1.88049
0.124315
0.225568
0.177041
1.9501
0.278323
0.689137
1.93707
5.15113
10.9188
8.47802
8.87925
8.15888
8.72538
6.30364
4.69507
4.07896
6.00749
7.79355
5.23926
5.05453
7.18082
7.25136
5.96415
6.19953
5.55787
9.32035
7.39955
2.57211
0.71003
2.33533
1.9335
0.324683
1.65716
1.33841
2.34995
1.93445
0.501562
3.64417
0.834658
3.55538
3.97109
7.74034
7.32256
7.85865
10.7362
10.879
7.56818
7.44441
7.76621
6.21046
8.99974
5.86314
6.60102
6.51179
7.55093
6.74637
6.98409
5.73702
6.92956
2.21922
1.80039
1.38454
0.747236
0.550651
0.382293
1.12915
0.378722
1.39527
0.905769
0.846598
0.483177
1.34119
0.882
1.34335
4.07127
2.87544
1.80508
1.881
2.85292
1.45476
0.737153
0.842263
1.22322
1.24648
0.596037
2.30551
0.906061
0.547519
0.186141
0.117522
2.27773
5.73676
9.2845
6.87356
7.91057
9.83498
13.4655
11.9417
10.932
11.0506
9.02137
5.58465
5.93732
3.01615
4.26754
4.94182
7.60748
6.16392
5.07898
2.80203
2.03308
1.937
0.382332
0.563803
0.921743
2.76461
2.77925
1.83342
0.440551
0.147498
3.51366
1.1807
4.64384
6.39073
7.08696
7.05832
6.68137
13.3215
8.4917
10.6991
8.01548
5.51246
2.36354
3.62452
9.32481
8.57674
8.65408
6.0769
6.95066
4.7459
6.63322
4.51452
1.54602
0.76957
0.905958
1.21529
0.87333
0.346386
0.749053
1.23874
1.3975
1.02866
0.136229
0.648202
1.62332
1.4097
1.61336
1.92844
0.522521
0.376586
0.449715
0.788362
0.370459
0.317824
2.17616
0.605831
1.28943
3.38689
3.00253
2.14716
4.28786
3.49945
4.83307
6.84569
6.29486
5.87488
6.29807
4.34696
6.03926
2.68732
1.45302
3.41704
5.50311
3.95372
5.70879
3.53503
1.4847
2.95099
5.86224
4.76192
5.98465
6.19811
8.69998
6.48704
8.04423
6.74579
3.81743
0.953446
1.22907
3.17816
0.617475
1.55777
1.52613
1.75546
1.85751
2.72644
2.37709
0.200991
1.86913
0.81674
1.12022
5.1825
4.50508
5.64784
6.05534
9.56456
10.9766
10.9825
8.96554
11.058
9.47803
9.35593
9.29934
6.99526
6.58031
4.94302
5.00491
6.02419
4.55691
2.44858
2.93042
2.8749
6.96152
4.18919
0.462848
0.289046
2.1758
2.46098
5.8773
0.441507
0.467223
0.851258
1.11329
0.204394
0.728853
0.899876
2.61809
0.48633
1.94104
1.7798
3.19266
2.12864
3.93604
2.05636
1.0153
1.53059
4.41442
9.05594
9.25776
9.81897
10.7962
9.46031
12.5429
11.5124
5.35089
6.58718
6.27681
4.76505
1.12452
5.34085
6.88241
8.13211
9.1904
8.83717
6.22862
5.25121
3.31822
8.3951
6.80586
6.6733
5.94368
4.40866
3.7751
7.32326
5.52885
3.60043
7.15196
5.6001
6.12004
4.35212
4.08714
4.70263
6.11989
3.59374
1.00256
0.552811
1.75909
0.807535
1.38653
3.66347
4.216
5.43993
4.36503
1.29628
0.144923
0.234944
0.471373
0.180559
1.34411
4.15634
7.794
8.25312
9.45844
12.0791
11.8291
7.90427
8.58969
5.02054
2.83439
1.42636
1.29674
1.92312
2.94304
2.75671
3.28842
2.60746
2.67807
4.96214
9.09278
9.34141
10.833
9.15307
8.8382
8.73025
6.75733
3.29056
3.21696
1.13286
5.86826
2.04015
1.31505
0.991534
0.616317
1.16342
3.4501
2.49211
2.27158
5.03809
8.14163
6.05359
8.34606
7.91875
8.92634
10.5545
1.49482
1.12978
0.863449
1.97615
6.43805
10.814
8.1528
7.0653
7.90527
4.24792
1.82419
1.73711
3.17699
1.48513
0.692472
0.201697
0.251486
0.495021
0.253365
0.166794
0.339401
1.07714
1.41709
2.34656
0.151135
0.35392
15.059
1.23752
0.175278
12.926
18.894
3.15335
3.56481
4.25604
3.36874
1.68428
0.5808
1.32078
2.27076
3.75948
2.36107
1.80235
0.798021
1.83953
5.86623
5.87769
3.51772
2.66514
2.84146
1.75149
1.57401
5.25956
0.875986
1.18329
3.24021
2.70082
0.849356
1.00383
0.587726
1.27735
1.44841
0.906595
0.0862263
0.222261
0.889746
0.409863
1.11529
3.10809
2.36866
2.07543
0.541756
2.44184
1.62149
2.39615
1.01614
0.7262
2.23036
3.38071
0.928705
0.676629
0.542968
0.809639
2.54275
3.12186
4.73311
13.1755
10.1512
11.4883
8.14291
10.9179
12.1313
7.44808
7.10238
4.57056
0.444331
0.0934884
0.571753
0.163755
2.67292
4.96921
6.56179
9.1989
9.56869
11.8597
10.4703
12.0378
10.7346
12.2796
10.4643
11.145
9.98797
6.89336
6.55261
7.89064
7.95575
4.95176
4.56453
4.62452
1.73902
1.88026
4.17594
3.67361
2.04683
1.33964
0.810261
0.232821
0.29731
0.241387
3.60992
3.1527
3.59525
1.97382
2.06504
0.161079
0.863723
3.75277
0.811899
2.9341
0.507507
0.811576
0.0688925
0.19415
0.884813
2.15984
4.56841
7.73017
7.85444
10.8934
11.6554
15.0822
12.1209
9.80911
9.09061
7.44705
7.28906
9.03814
7.20639
10.0723
13.5621
7.40027
8.58045
5.54071
2.82989
1.91695
4.04175
7.61057
10.971
5.15424
8.55946
3.64252
0.308859
1.50086
0.24245
0.186504
3.78696
1.85935
0.850964
0.369109
0.619209
0.545061
2.27341
0.242063
0.642031
0.0880023
0.108455
0.11533
1.76382
0.0928549
0.068075
0.139886
0.192792
0.095784
0.168989
0.330879
0.76922
0.960674
0.136626
0.897401
3.61922
7.68379
5.04973
4.73589
8.31702
10.5929
9.47438
12.6308
6.39248
4.14018
0.781571
1.33069
1.04294
1.03815
0.766658
1.47883
1.98028
1.6315
1.18113
0.259114
0.864906
0.551383
1.18742
0.684668
0.153465
0.526723
0.856346
2.57687
1.0907
0.661443
2.45337
1.04473
0.306836
1.27713
1.74562
1.69615
0.47932
4.58686
3.75301
1.56361
1.80891
0.745966
0.730029
0.238865
0.0433037
1.38588
0.885061
1.42402
2.75408
2.27051
6.09262
3.38226
1.9019
0.312256
3.89495
4.96352
10.0851
8.82558
7.97014
5.07324
4.35485
5.07697
3.98499
4.5363
3.32786
2.38664
1.7899
0.60138
1.92789
1.0898
0.428671
2.31127
3.51895
1.12863
0.494759
0.650208
5.42242
0.0190767
12.0836
1.52712
8.40089
8.38579
1.46658
0.681943
2.07676
1.7772
1.94953
0.698383
3.81814
3.51353
1.85867
3.52447
1.02278
0.26328
0.685465
0.706889
0.582576
0.167379
0.769832
2.37728
3.87793
2.09872
2.46855
1.88392
1.42595
2.88871
2.15427
4.20678
5.23673
5.82062
5.97796
3.4096
0.931586
2.18396
4.41153
2.38212
2.17287
1.21784
2.02769
0.435412
0.603424
4.7652
7.05185
7.27873
2.31082
9.79096
11.0089
4.94214
8.03068
5.65161
4.20204
1.89612
0.807966
1.93337
0.571703
0.923939
1.41448
1.86603
1.61188
5.34813
9.53642
7.44222
5.74816
7.26681
4.10163
4.46309
3.94892
2.21183
2.43893
1.81435
1.3204
0.410548
0.674793
2.73449
4.56521
3.84869
2.25995
2.51278
2.02204
1.36192
0.611291
0.604468
0.81113
0.685911
2.91578
[truncated: 9,937 more rows]

## Sheet: Mouse 9_Velocity
0
0.864211
0.644529
1.53569
3.51042
2.28759
0.958253
3.94924
5.1406
3.56749
0.946076
3.88295
2.60239
0.530821
2.06329
6.28992
2.29138
5.8197
6.73652
7.7924
5.93732
1.42098
0.446082
0.49903
1.06709
1.04882
1.40356
6.55316
4.09938
0.11916
0.237056
5.55553
5.05161
1.48826
1.47106
6.76907
0.783574
3.56738
2.71176
1.47034
2.60478
2.75308
1.39768
2.31261
0.71793
1.04494
0.421236
0.74533
1.53359
0.353744
0.812569
2.20296
1.76329
2.24329
1.75104
0.856798
2.08406
3.0108
1.20841
0.481014
0.649509
0.0835333
1.14949
2.42575
2.91277
2.65245
4.87668
4.89888
9.75199
0.559247
2.61221
0.165782
2.99102
6.64552
5.78698
7.43164
8.25499
6.8714
0.454544
0.954134
4.57716
8.84021
6.6026
1.10796
5.82841
1.62723
6.58281
5.73069
6.76832
9.33115
9.19605
8.47433
7.3336
0.34633
1.78923
4.28821
2.17552
3.23678
0.544151
0.803581
1.61431
1.79693
5.12764
5.22724
6.47924
12.662
8.34438
6.64909
7.98393
10.031
11.8009
7.60564
7.05506
9.586
7.96635
0.638736
4.10863
3.1829
3.68103
6.59064
3.69196
7.27342
4.31172
1.95638
0.331272
1.2548
3.6026
3.40351
3.53642
4.36503
0.922178
1.71941
0.110547
0.365912
0.287094
0.650613
0.321929
0.625553
1.62153
1.47053
4.31209
0.603947
0.436826
1.59078
0.312108
0.285172
0.267993
4.89897
0.681069
0.194079
0.69488
0.552822
0.784107
2.47971
2.00376
2.51725
2.47337
0.836153
2.47016
0.342637
0.522846
0.136312
1.30828
2.31008
4.1981
2.13141
1.65877
0.773913
1.86676
0.807532
3.87211
2.04806
4.13112
5.06237
6.83765
6.67564
9.09008
10.5768
11.0217
11.8088
10.9541
16.8271
8.06494
5.62779
1.20399
3.29384
4.79724
1.12962
2.63202
2.4254
2.00233
0.464771
0.407062
0.16836
1.54198
0.0935524
0.874074
1.97122
2.30347
1.22079
0.622908
7.74276
9.18802
3.79877
1.6015
1.46695
6.07611
0.960558
1.51352
1.8574
0.206582
0.525372
0.408055
0.34102
1.44726
1.09661
1.15131
0.287701
5.01017
2.28527
4.28472
6.15861
8.21959
8.88262
10.9204
7.0976
4.07994
3.1965
2.74203
8.03068
3.66889
0.56269
1.0746
0.508304
1.42142
0.650277
1.02665
2.21749
6.84048
7.00799
6.59369
1.81476
6.17101
9.0683
8.66841
4.81694
6.32034
1.33329
1.66049
1.33957
1.40075
0.969846
0.545696
1.27709
0.496246
0.871195
1.66549
1.95445
3.50564
0.840894
0.513366
1.70724
0.140597
0.43617
2.95044
8.5894
2.82497
2.50327
0.741671
4.34614
0.777962
0.143339
0.400571
0.550792
4.62031
3.25345
6.3228
10.0961
2.60635
2.5838
0.354265
2.34996
4.32145
3.02894
2.35702
1.21811
2.02875
0.683935
0.330217
3.55715
0.735616
6.79069
6.2935
9.95546
6.55221
7.2838
10.5359
9.61309
4.1223
3.87853
6.79759
5.23922
1.93753
0.612568
0.751325
4.18515
0.346414
0.463169
1.59459
0.859924
2.98802
5.18599
1.83445
0.641003
3.5656
6.41113
3.3831
1.88559
0.328874
0.762772
4.16753
6.9726
12.1478
5.78851
5.92305
2.98876
4.2165
7.30962
3.71558
4.19154
0.137197
0.467049
0.351208
0.623529
0.103286
0.251928
2.06126
5.22099
9.67583
2.93828
6.04227
10.1911
5.77541
6.06981
7.19764
3.53933
1.32111
1.62335
0.732363
1.92828
7.06804
7.24484
6.75676
2.84397
0.891248
0.387417
5.04828
0.19406
1.41927
3.25647
3.01296
6.71175
11.0153
10.2287
12.205
10.3448
10.7075
11.4889
10.9612
10.959
13.6667
8.09514
7.11457
3.59676
1.78034
6.81238
0.4373
0.606483
6.7834
2.15859
2.40284
0.672626
0.907384
1.46021
0.228122
2.24247
1.66679
0.0956744
0.188894
0.789908
0.148843
0.218245
0.920957
0.0426383
0.384055
4.53721
1.51672
3.14948
0.707953
0.506668
4.163
4.69548
5.17744
3.58735
5.29565
2.42355
1.79569
3.66279
4.61155
3.75814
1.6782
6.88763
14.9933
7.72177
12.0939
10.4886
15.225
8.69635
6.29774
7.10841
5.18122
6.11128
7.86871
3.46945
2.63284
8.57238
1.61415
2.02356
2.43631
2.87388
1.53563
0.264475
0.375411
0.405131
1.69894
5.49815
11.7229
8.41433
9.53367
7.72354
8.00315
8.47657
6.82863
7.45237
8.64828
9.15797
6.43032
7.57594
5.59225
2.5348
6.11041
1.08596
1.34732
2.6265
4.20912
6.80337
8.91112
7.80831
5.24204
3.51516
2.99667
4.53287
11.5401
10.0764
9.82154
8.10318
8.05956
9.45107
10.3548
3.14361
2.22354
10.0651
10.5271
6.05649
6.5865
1.89252
3.39342
1.06352
2.18963
15.6478
11.6813
5.91245
0.919804
12.9918
1.77567
1.61823
2.77436
3.28164
7.86276
10.7978
4.25533
0.701232
3.43706
6.67425
9.19696
7.44451
5.70271
7.85709
6.26176
6.35992
4.88922
11.3902
5.1061
7.34899
7.76492
10.1201
7.96746
7.92961
6.26731
8.01184
5.0635
4.95279
3.49624
0.979423
2.16179
1.23904
3.94321
3.48562
0.234717
0.639349
2.97893
9.12616
4.87184
1.4683
2.43116
0.690352
0.633756
5.04738
4.51792
8.3971
7.96466
7.72741
6.18658
2.79996
0.84911
3.24247
0.585416
0.834745
3.30131
1.86873
1.72073
3.24655
2.32065
2.21142
8.28749
0.10682
2.30804
1.06805
0.965142
1.43973
2.72741
2.76809
2.38975
0.975305
2.11529
3.11508
0.332764
4.19702
4.68946
1.60254
3.07482
3.35656
0.690029
1.86744
0.482654
0.410634
0.565669
3.40385
2.29079
3.84411
0.644618
0.127794
0.701135
1.4802
4.98879
2.94688
3.01797
3.04464
1.55983
1.79131
1.08861
0.577718
2.84646
3.51336
2.69543
0.990299
1.65723
3.35241
8.2139
9.03837
7.99824
9.4905
13.7705
9.7153
7.86666
7.66197
4.2444
6.90434
2.737
3.36625
4.9189
1.04085
7.60533
2.0725
0.809057
1.07723
1.72494
0.604284
0.845477
1.22216
0.574599
0.0786414
0.230912
0.157285
0.495307
0.414315
0.178176
0.0771215
0.430445
0.455406
0.464406
0.0724443
0.397971
2.1649
2.8
0.794099
1.96108
0.64335
2.3339
0.363891
0.287298
0.738245
0.728078
2.43124
1.2163
0.618079
0.53943
0.38949
2.34349
7.04658
10.345
1.86242
0.809396
2.29497
0.386871
1.99883
5.18552
3.52509
1.36698
0.121654
1.46294
0.544833
1.64289
1.13318
3.24173
0.162868
1.73485
1.82876
2.14219
0.472709
2.03463
6.08082
0.703306
3.99443
2.94155
2.67871
3.24144
2.89305
5.84292
9.50049
3.44945
1.00776
0.862632
4.3298
1.31376
0.356996
2.28359
11.1769
10.0753
9.94389
10.45
8.14621
3.08173
7.1186
3.44098
4.11297
10.0132
13.31
7.58031
7.7384
6.33094
0.593965
1.88938
0.799986
0.742814
2.54171
0.749457
1.36462
0.70176
2.43396
1.29094
4.01654
2.36229
1.46576
3.44152
6.4634
6.51051
7.23746
7.2216
5.90907
8.15282
5.33077
3.40529
6.36648
7.22942
4.23677
1.99249
0.601617
0.284414
0.818721
2.13084
0.79421
3.10203
0.623315
0.344422
0.0527023
2.3166
1.86371
0.575464
0.299689
0.611462
0.716363
0.149048
0.0493309
0.759196
0.552243
0.269859
0.296205
0.117429
0.191716
0.173163
0.330382
0.299609
0.242722
0.767656
0.383304
0.269392
0.509053
0.476681
0.643752
0.210377
0.354697
0.500405
0.80166
0.892292
0.780339
0.238701
0.905177
0.751665
0.105372
0.686146
0.45754
0.22867
0.51681
0.448527
0.158577
0.790442
0.770565
0.360475
0.17773
0.171788
0.205477
0.372728
0.465028
0.218833
0.166617
0.491537
0.975454
0.723274
0.552851
0.76872
0.425978
0.630107
0.234936
0.158117
0.481112
0.349326
0.386227
0.322133
1.05954
0.371405
0.551967
0.215394
0.926774
0.897839
0.939406
0.187391
0.914133
0.13938
0.778546
0.948945
0.696725
0.178123
1.34391
0.387063
1.51622
0.446731
0.0592778
0.414154
0.837231
1.17975
0.893117
2.26077
1.4884
0.435004
1.04158
0.171524
0.56963
0.169544
0.232745
0.172853
0.206219
0.0638455
0.350966
0.964833
4.78547
1.81717
2.37533
2.24808
0.729026
3.09657
0.200742
1.01811
1.38546
1.57123
3.63436
1.12992
2.98042
0.410767
0.627792
0.568436
1.06754
0.45423
0.539329
0.714988
0.532011
1.23339
1.07741
0.618722
0.414766
2.36063
1.11953
1.13753
1.73134
1.43506
0.280553
0.134172
0.22735
0.021221
0.822376
2.27347
1.19186
0.874161
1.47348
0.453706
0.940144
0.831013
2.85194
1.2372
1.65543
6.73545
3.39174
6.9671
6.38116
1.58873
4.99626
2.43847
1.35527
0.813006
1.0853
3.91313
0.705906
4.33549
1.45328
2.24813
0.460106
3.31308
2.58427
3.45189
0.7772
0.947144
1.74509
6.77418
2.37417
0.486299
0.186832
1.97905
1.1785
0.713652
0.538422
1.93815
0.177764
0.560949
0.836052
0.633492
0.213212
0.101557
0.31744
0.11954
1.54042
3.14094
6.2097
6.68682
7.82183
6.5559
8.52434
11.289
11.647
9.11014
4.84906
1.42492
2.13183
0.629641
2.81346
3.27431
6.21886
6.47401
4.46004
7.28554
4.9693
1.0405
1.75614
0.48922
5.96947
0.872646
0.213231
2.01829
0.752019
1.39821
1.43429
0.143668
2.50173
0.862366
1.39458
1.25569
0.3623
1.55024
0.161037
3.57927
3.45015
1.16583
1.35492
0.941381
4.20522
3.58986
3.21304
3.68948
0.429
1.16061
1.44759
3.67107
8.24378
8.46435
9.44642
9.48484
11.8668
10.8805
8.40827
6.64897
1.64742
0.559931
1.35307
2.93504
1.17188
3.9721
6.09318
1.59717
2.28857
1.98684
1.76865
2.63513
7.49179
10.3369
9.4497
11.1683
5.10287
6.38356
1.71352
4.40059
2.29456
0.345327
2.04934
1.8426
3.07176
2.28102
0.749049
1.30287
5.97742
5.2085
4.73188
2.37948
3.34189
11.1036
7.99192
10.1917
8.42323
9.99346
2.19997
3.30798
2.33172
1.9724
0.346698
1.22694
0.793447
0.96912
0.08812
0.0765221
0.0536488
0.134027
0.191244
0.987602
1.93129
10.52
8.39642
11.8757
7.02091
7.77236
10.6743
11.3524
5.02581
5.28081
0.283665
3.38277
6.50878
5.46474
3.50148
2.82098
1.04032
1.20316
1.43978
6.05748
3.84235
2.32455
1.8995
1.84058
1.47428
0.924436
1.43305
2.73457
2.60759
2.80288
4.58645
2.61398
4.23194
0.0162124
0.138309
0.764805
0.618319
0.86569
0.227079
0.0943157
3.91785
2.31951
0.877133
1.48081
0.342618
0.259792
0.8789
0.524458
2.42329
1.69991
0.367931
0.504298
1.70944
3.28848
2.92103
0.661853
0.644726
3.25989
1.61832
1.11433
0.926962
0.637297
2.57334
2.57934
1.85237
1.77487
3.86359
4.37976
0.271045
2.90395
3.40352
2.0737
5.26104
4.39595
6.30442
4.83611
9.21337
12.062
7.52245
6.33361
10.9237
8.15087
10.3627
9.10241
8.03727
5.87119
5.54991
5.55318
1.26667
4.5924
0.623786
1.47718
2.9489
1.10725
2.88157
4.25651
4.04434
3.8789
3.02375
6.47648
5.04273
0.963012
2.51042
3.02232
0.893383
0.655744
0.938315
4.18059
5.80128
1.26767
0.923941
2.52706
1.62838
1.82998
0.158183
2.18459
0.399768
0.430714
2.11329
0.439997
0.928471
0.688841
2.60293
1.91574
0.949689
0.575836
2.53323
1.96988
1.56141
3.15884
2.31842
3.55892
1.09951
4.08251
4.60718
0.305343
1.1403
0.532475
2.82314
2.25279
2.92524
1.1368
3.03795
1.71391
4.10375
1.64488
1.08067
1.06069
3.41934
10.5954
3.90588
5.189
5.59301
5.34156
5.19345
2.42151
2.9793
6.98117
8.14926
7.8232
8.38958
9.99576
13.0144
12.4211
10.411
16.3875
9.27191
10.4628
8.38447
5.25701
4.02444
3.39702
2.77477
4.82513
6.71566
11.6724
10.6843
8.96256
7.72412
8.87893
6.80216
3.32199
3.53042
2.17603
0.402285
2.14286
0.29591
0.713938
0.666463
2.18629
0.677233
5.54884
0.464201
0.075248
3.3316
1.01061
1.04068
0.915791
0.533912
0.435304
0.67954
0.274111
1.66301
0.960426
3.84537
0.513313
0.80958
1.37201
3.39053
1.36412
1.79882
1.0424
0.95785
3.19965
1.34402
0.847347
0.950873
0.262009
0.329586
3.26462
0.604557
0.275783
0.709593
0.989736
0.497148
1.09987
0.398179
2.57796
3.66153
5.66914
1.50893
2.91362
6.6884
8.25786
8.16819
11.3381
9.73994
6.98234
12.3888
10.4154
10.7422
14.4378
7.19292
10.4563
6.11715
0.1443
2.36754
3.38248
1.75417
0.48728
1.44884
3.30226
5.76871
2.68101
2.87605
4.32741
0.125472
3.2879
0.844187
4.72696
2.25609
0.921363
0.858946
0.628727
2.68509
1.60496
1.1786
2.49739
1.0752
0.401636
0.417545
3.09618
0.424205
0.683794
0.938901
1.29219
1.42934
5.27145
3.81808
2.21834
0.72525
0.436966
3.23569
0.804181
1.2385
1.67637
4.43214
0.800416
1.62724
3.39248
1.47288
2.65147
3.28073
3.11245
0.983177
2.95869
0.525909
2.81869
2.88452
2.15007
0.607918
1.47222
2.33519
5.13191
5.80422
8.90727
5.1197
4.44152
8.57454
13.3825
9.13729
13.9085
12.1382
10.7401
14.5345
13.4886
10.4271
9.27472
4.08647
4.93137
6.10233
6.75588
4.72769
0.692125
0.201431
0.236058
0.684979
1.74348
3.83457
0.652134
0.22899
0.266099
2.22217
2.7733
2.99915
1.69228
1.09792
2.97565
0.260658
0.80044
5.14109
2.99485
1.57208
2.23056
1.67391
2.92246
0.536531
1.20499
1.65518
0.989953
1.50987
1.30074
0.742397
0.626422
0.827025
1.51089
2.87257
1.9723
0.851067
3.63212
5.43762
3.62924
1.58821
1.79288
3.05326
2.18852
5.67521
3.616
0.80629
1.43111
2.29842
4.0902
1.65795
0.56843
0.270688
0.294786
0.730572
5.07246
0.10078
6.56359
2.50344
0.776692
1.26974
3.59392
2.21023
2.89981
8.33913
8.72291
5.68403
1.47034
0.730144
1.6139
4.94172
0.63497
2.99835
4.01764
4.53078
4.189
0.639241
3.47583
1.49267
1.89322
0.632548
2.12425
5.06791
6.40276
2.69556
3.5563
3.45264
3.75499
3.06749
6.0755
4.90744
5.37122
7.5013
6.97203
7.78854
9.53536
7.21022
9.42219
6.572
4.88691
2.2033
5.17997
0.832698
1.74055
2.04574
2.31235
2.12061
2.64534
0.485758
1.55115
0.739212
0.815115
2.228
2.4811
2.71898
1.06836
3.10144
0.490812
1.01047
0.177001
0.0549393
0.331414
0.394008
0.450294
0.100777
0.652461
0.0878518
0.421498
0.70319
0.207666
1.32714
1.05266
0.405419
0.665459
0.582942
0.242907
2.14455
0.449862
2.87719
3.37326
0.6377
1.03222
2.29228
0.789977
1.35036
3.76909
1.47037
3.61272
0.835753
1.49677
0.89999
1.31716
0.404802
1.90109
2.06655
0.802393
1.07993
0.913007
1.93371
0.96934
1.23925
0.926156
0.514017
0.693439
2.66907
1.25119
2.04845
4.27703
6.68576
5.27137
4.16768
2.86858
1.17253
6.83669
8.11448
9.9656
6.31287
6.64012
5.4697
7.75239
6.42006
7.49842
1.43555
0.498061
0.949367
3.11007
2.61279
7.18815
12.1848
8.9881
9.91603
7.31445
10.8789
9.60153
11.8783
10.1494
7.03904
3.53627
0.38913
1.59331
0.690896
1.32635
0.774446
0.191059
0.355183
0.296997
1.41422
5.27286
2.79661
2.66426
4.78954
3.48857
3.04335
7.93239
6.67089
2.76983
2.67319
0.750383
5.49543
5.09939
1.19003
0.278399
1.28155
0.174642
5.10963
2.91868
1.72516
1.07417
2.91666
2.38597
0.564819
0.567652
0.25921
0.385937
0.624708
3.68075
0.126062
0.890719
0.649933
3.62709
0.434596
0.609189
1.56397
6.17588
0.114351
0.468814
1.59475
1.72284
1.12643
1.97598
1.10159
0.108928
0.860376
0.844951
1.28488
2.6407
5.18816
5.75405
9.27481
4.4761
4.11222
7.74384
11.2156
15.7205
11.9063
13.8747
7.10935
7.70671
4.56572
2.05507
4.88831
8.1487
7.16356
5.10061
1.73812
0.759686
1.79555
3.21095
0.651474
0.887418
3.95293
2.40917
7.71095
7.64763
6.20549
5.88397
2.89303
2.8557
2.09063
1.89714
3.33708
4.44866
7.60503
5.98497
5.93595
3.4355
4.871
2.63744
7.10067
6.36588
9.74319
7.72024
4.24777
0.973149
0.252331
0.904721
2.49002
2.30198
2.72069
2.38339
2.75006
2.11646
1.32191
2.37735
2.56153
1.19822
0.609131
2.0597
1.49082
0.478779
0.175898
0.414327
2.16083
1.56541
1.37161
4.38294
1.07783
0.269748
0.707381
4.86171
0.0531112
0.25363
1.54767
4.36726
1.31029
1.19855
2.18213
2.988
3.19545
2.49173
1.81349
4.97143
2.70027
1.58285
1.1038
0.285659
0.991972
2.92364
5.97879
5.40156
3.66062
4.47978
0.399031
2.44196
0.375325
1.54648
0.731458
6.94158
6.1629
7.69321
12.1556
14.4151
10.6004
9.3661
14.3236
7.36816
8.14427
6.79611
0.477526
3.31046
4.06693
1.17118
2.36715
2.03451
3.90105
1.37091
0.942539
0.97447
1.04469
0.885565
1.69943
2.21949
1.77614
2.33787
3.01312
5.99659
6.77886
5.9224
8.2696
10.4641
1.33405
0.987697
0.613565
6.84827
7.89722
9.8647
5.86693
6.37148
7.94545
9.30642
12.3025
2.03042
2.90856
2.07073
0.824713
0.866809
5.04294
3.35887
3.99009
3.4034
1.75086
1.9261
4.09229
0.931905
3.13369
0.348596
0.175751
1.55278
0.474962
0.484049
0.688258
0.46506
1.0343
1.90374
0.323043
1.37735
4.15067
4.19205
4.39258
1.05415
0.646144
1.13855
0.54476
0.307877
0.551033
1.82402
2.35223
2.85467
1.85017
0.698032
2.5663
5.48322
4.01856
0.879852
3.84481
11.9101
7.63493
11.2074
9.29111
11.0226
5.9803
6.83062
11.2716
7.08819
9.8826
2.4307
2.52766
1.50301
2.59887
11.4477
13.0933
4.88313
3.38562
3.81686
6.59095
3.58036
1.69405
0.917481
1.68482
1.01436
2.02592
0.1075
0.345146
2.19532
1.36878
1.58608
2.00268
3.021
4.99493
2.32915
1.07494
2.17789
1.38591
3.68767
6.82326
7.16337
6.72218
4.54349
1.88397
3.86984
2.204
2.5871
1.27971
0.341944
3.49581
5.69283
7.16987
8.29715
5.78927
10.7844
14.1723
8.02944
6.93789
7.19933
10.7519
2.20478
1.18723
1.70133
0.935405
1.66048
3.14594
4.08176
2.45394
2.35967
3.272
3.91323
1.95068
2.06656
3.47712
4.27796
5.27318
11.0708
2.13283
2.11277
8.55743
12.4877
7.80238
7.03296
6.73873
10.3157
8.8251
6.58446
8.66233
8.34732
5.83771
10.7965
6.2269
2.24774
1.86832
2.11747
2.57446
5.57706
7.79442
3.89847
0.742305
0.190808
1.08733
7.36921
3.41952
3.01788
1.44651
1.49406
2.32974
2.09138
1.07894
6.06332
8.84551
3.77946
4.7315
4.90949
5.33559
8.36293
4.79426
2.33937
1.20119
1.06288
0.450056
1.04997
0.159883
0.38662
0.655403
0.560306
3.12584
0.666388
1.49268
1.71225
1.21069
3.13776
0.266164
1.31902
0.455768
0.56662
0.830692
1.25061
2.44205
2.62977
2.70358
7.46532
8.6969
5.7471
7.68352
9.8947
2.55442
1.82026
0.313568
0.259069
2.56146
1.38697
1.28648
1.00657
5.86029
1.12732
0.573182
1.56295
4.39894
9.85569
3.94682
6.79141
1.36542
0.637623
1.80997
1.11671
1.51722
0.97711
5.57827
2.37826
4.47119
0.223957
1.66881
1.60903
0.715822
0.160496
0.155735
1.51172
0.728641
2.81994
1.19386
3.92517
0.859832
2.99982
0.376391
0.39823
1.59794
1.1759
1.68153
2.60915
3.72021
4.03918
0.0252123
0.225202
3.00483
0.382264
0.279365
0.729103
0.390317
0.227668
0.484312
0.536555
0.91784
1.45505
1.12941
0.906281
2.95672
6.75397
4.72633
1.0813
0.156037
[truncated: 9,938 more rows]

## Sheet: Mouse 10_Velocity
0
2.45646
0.32277
0.259783
0.318816
0.709783
1.90923
0.222931
0.294116
0.636996
0.316824
0.165315
0.296925
1.45621
1.63373
3.28487
1.83066
0.24362
1.36434
0.857346
0.647316
2.23811
1.93529
1.44952
0.478444
2.54553
0.865019
1.23522
1.44866
0.572893
1.12056
2.55878
3.45601
1.23355
0.725754
1.14588
1.25824
1.25145
1.46626
0.636795
0.623501
2.32473
1.95728
2.94707
0.897443
1.23139
1.49503
0.279823
3.00179
1.24221
3.6252
1.39933
1.68829
3.28013
5.71762
2.66071
0.782129
1.93314
2.89546
1.5713
3.27527
3.62144
4.83331
7.50733
7.91836
3.30765
3.99658
1.52419
3.35686
2.0709
0.867892
0.970886
0.943141
0.170396
1.71761
3.97338
1.14924
1.07426
3.54701
6.15105
4.81121
0.116364
0.817333
4.26204
5.44497
4.39624
2.51093
1.14689
1.46204
3.68527
2.78589
1.7551
1.36363
2.20621
3.675
1.7209
0.506589
0.274052
1.08128
1.79205
2.7218
2.10341
1.39518
0.371652
0.780914
0.68479
2.63349
0.953365
1.29256
1.79413
1.94366
6.2588
0.533743
1.64793
1.88885
1.10643
1.63528
0.304582
0.468066
2.2414
1.30065
0.999435
1.94252
3.02612
1.59743
1.422
1.89283
1.06566
1.15614
0.620936
0.410296
2.27963
4.31737
3.40869
0.332216
0.950818
0.893511
0.407073
1.33076
1.96796
2.42121
4.79816
1.11087
3.97329
3.552
4.92926
3.65116
3.65098
3.299
5.77791
10.4608
6.98775
4.3797
0.603046
1.83526
0.635224
2.74769
2.05023
2.70903
3.81208
5.38789
4.30163
4.31261
8.31883
9.06526
6.3968
5.94455
3.45549
6.37386
6.23322
5.43498
6.28688
3.66478
0.635239
0.612131
4.0608
0.503216
1.57571
2.43116
0.710826
3.53463
3.20224
2.81265
4.2951
4.96246
3.8185
2.10604
1.03084
2.73788
3.55572
5.87174
4.74196
3.48907
4.98358
3.73877
2.93228
0.7797
1.44888
0.441549
2.44116
0.957935
0.0733008
1.31582
0.130613
0.101809
1.37106
1.40852
0.816087
0.47427
0.519162
0.506296
0.752532
0.423045
0.476674
0.335537
0.165427
3.04138
0.363133
3.06035
2.92549
1.19086
4.79448
6.47729
4.45795
5.20934
5.67308
1.65163
0.762664
0.861198
1.02129
0.723786
3.45999
3.79419
0.520552
2.60187
2.4537
2.38011
0.420954
0.609441
1.65374
1.28228
1.61396
1.86617
2.21698
0.929822
0.450732
0.139875
0.826929
1.41967
0.723386
1.44954
1.12599
0.565085
2.12957
0.754818
0.725455
0.574679
0.367695
0.225534
0.75595
0.191677
1.39817
0.234941
3.85731
0.114826
1.02547
2.58827
3.13175
2.22668
3.93574
3.18349
1.67711
1.63613
0.55832
1.10903
1.07928
1.26906
3.65535
1.63713
4.88051
3.46252
1.35596
0.530642
0.411016
0.635977
1.81573
1.86795
1.99901
2.60469
3.63615
3.12418
2.82032
2.44438
3.49287
3.30951
4.99222
4.15659
5.51966
5.18453
4.43202
7.7344
6.41483
2.68129
2.86444
4.45876
3.91113
1.88562
1.73023
0.262239
0.451339
0.974327
0.777153
0.159181
0.957732
0.0779341
0.288302
0.435044
0.722815
0.67518
0.282628
0.429956
1.75571
0.705235
0.984724
1.22794
0.637048
2.64834
1.35101
3.94835
0.764433
1.692
0.160137
1.95051
0.291451
0.0925402
2.93379
1.2654
0.973438
1.82818
1.84038
1.73986
0.794407
0.701405
0.935625
0.825604
0.713487
0.30402
0.891443
1.61644
0.289955
0.0264959
0.980317
3.22059
4.64156
2.74181
1.92299
1.48844
1.34342
1.20608
1.44964
0.940621
1.59443
2.21304
3.68541
3.80763
4.30976
4.79297
5.58554
4.7711
6.29229
3.86635
4.98313
3.65343
1.59771
0.929637
0.87758
0.82748
0.365053
1.10594
1.4824
3.43854
1.61526
3.19903
7.58817
7.27693
3.39972
2.62207
4.61321
7.73034
4.40164
2.86039
4.06973
4.26653
5.75889
5.46165
3.81552
2.11419
1.23943
1.37506
3.16547
2.64379
3.88897
0.204751
3.22238
0.395277
3.01096
1.52951
3.03346
1.64807
1.03195
1.46955
0.386879
0.46437
4.00459
1.64134
3.18036
3.03923
1.95705
2.1768
1.23425
1.49317
2.68115
0.856915
2.58814
3.1031
1.58999
1.29054
0.237792
0.840897
0.693617
0.177665
0.236846
0.890742
1.9866
1.22688
0.624059
0.635832
0.909137
0.345889
1.04238
1.38417
1.92905
1.22436
0.856163
0.831336
0.228144
0.758351
0.127892
1.2889
0.493178
0.26676
0.155606
0.0797452
0.351725
0.633839
1.09694
2.26895
3.58478
0.850837
1.61254
0.935917
1.18374
0.871551
1.91282
2.80942
0.674665
1.58655
0.901941
1.61823
0.471084
1.55522
0.931595
0.291151
0.823491
2.88734
7.55637
10.5743
5.69173
5.00946
3.80037
4.91696
5.36656
4.5199
0.757771
1.59126
4.25853
1.02182
0.735158
4.6636
0.366123
0.390228
2.98412
0.101926
1.42471
0.293119
0.317174
3.34286
0.913474
0.847304
0.890879
1.63442
2.96443
3.17603
3.84287
3.61404
3.42821
3.21757
5.75969
4.24315
4.20171
3.37552
8.14845
9.72856
4.94726
2.20651
2.61656
9.07317
4.40244
6.55679
5.12542
6.84282
4.27398
2.50399
0.828026
1.60753
0.544462
1.18545
1.86716
4.40169
2.24808
1.06353
0.481902
0.238411
1.5924
1.39696
1.08739
0.178132
1.23363
0.310572
0.87001
0.568954
0.209289
0.112988
0.727502
0.802996
0.641221
0.52745
0.352213
1.40742
0.878326
0.46159
1.46219
0.490977
0.778654
1.05559
0.987899
0.713991
1.30144
0.656782
1.3639
0.917762
5.42721
1.83836
1.35632
0.747798
0.230836
0.580465
0.817739
0.837302
1.12533
0.676143
7.45732
2.43246
2.99556
0.94787
0.485613
1.32473
2.43267
7.78899
6.10793
1.87238
1.41259
1.16704
1.70009
0.0602787
1.02121
1.90626
1.91605
1.14428
0.722717
2.60533
6.65984
7.5152
4.8864
3.65545
0.97853
1.08704
1.35128
0.403712
0.619568
0.373624
1.71303
2.6419
0.366195
2.47587
1.45453
0.819564
0.248726
0.228469
0.320073
0.157743
0.66291
0.436298
0.603908
2.06268
1.18517
0.501309
1.65329
3.06098
6.43473
3.59253
1.67917
0.241694
0.228704
0.32668
5.30886
1.59743
5.64713
6.43203
3.56383
2.27661
6.48053
4.44031
4.13861
8.87537
8.21123
6.00971
7.90388
8.14836
4.65456
0.912317
0.648836
0.842798
1.69115
7.06088
8.68867
7.28005
8.98846
7.85453
6.41748
3.02712
6.53506
1.90319
1.38672
2.2139
0.173299
3.46824
3.24321
1.53942
0.668317
2.73716
0.242013
1.6294
1.2885
0.768286
0.299406
1.11052
0.762369
1.49698
0.436278
0.984646
0.967884
0.397116
0.722189
0.420912
0.127937
0.478789
0.0485285
0.240632
0.864115
0.208735
0.463308
0.272784
0.256467
0.183422
0.419613
0.3539
1.86073
3.52565
2.72876
1.44143
1.65002
2.10547
0.193368
0.242779
0.630964
0.451526
0.389856
0.23621
1.12149
0.357154
1.29906
0.198187
0.590427
0.290691
0.104361
1.86309
0.872884
0.529085
0.217988
1.13688
0.866775
0.56775
0.545408
0.308398
1.11532
0.0996304
0.373315
0.781864
1.30195
0.788937
0.137057
1.62206
2.05823
0.56692
0.694718
0.614011
0.616242
0.821813
0.30891
0.50479
0.597669
0.265186
0.356168
0.400004
0.669894
0.436649
0.314296
0.609442
0.41207
0.159049
0.226396
0.664592
0.207471
0.681463
0.983899
1.47684
0.733312
1.06661
1.57995
1.86355
0.926099
0.498319
1.31624
2.75187
2.05935
0.596721
0.169195
1.36075
1.88635
6.20833
4.41862
2.00814
0.944065
3.03231
2.88725
3.35577
3.15567
0.97906
1.3316
0.57124
0.772373
0.684302
0.0467902
1.24584
1.20193
0.94265
2.29325
3.98187
5.0295
4.3841
3.28936
5.37143
5.41861
0.65602
0.940793
1.3579
1.32957
1.42179
1.08165
0.521002
0.586146
0.606533
0.386084
0.461521
0.64589
0.932703
0.549473
0.226988
1.00652
3.29316
2.80922
2.35572
0.552505
1.50319
2.73563
2.4526
0.910421
0.440341
1.31563
0.333727
1.34888
0.647461
1.03067
0.771829
2.81615
1.22343
2.53171
2.84103
4.65409
4.929
0.770065
1.84443
1.71736
1.12117
0.295458
0.539733
2.88022
0.72686
1.05876
0.461727
0.998159
0.355173
2.09364
3.97149
1.0088
0.805457
3.87588
0.67648
0.890191
0.425129
0.812787
1.11741
3.66706
5.45789
5.46489
5.22781
5.74293
6.28977
4.37198
1.05654
1.01407
0.876778
0.530673
2.60997
4.30055
2.53879
3.01871
2.42022
2.74165
2.27043
1.31017
0.655925
0.438485
1.75285
0.239905
0.720956
0.180159
1.08246
3.46258
1.33359
0.191206
1.18328
1.36518
0.116915
1.18837
0.569588
0.446007
3.34979
0.403041
1.14169
0.195468
0.366014
0.278475
0.254934
0.0574079
0.102674
0.639509
0.331955
0.649201
0.279768
0.795527
0.324366
0.435827
0.631263
1.34308
0.682536
0.351315
0.47512
1.56948
1.71176
0.8571
1.03425
2.70917
4.28905
2.43237
1.39763
3.86298
5.79204
2.68894
2.22861
1.10039
0.414355
0.506527
0.185782
0.855729
0.758639
7.39044
0.0484686
0.549315
0.444974
1.61609
1.30842
2.93212
1.11124
0.797086
2.13067
0.651477
0.38956
0.17621
1.38622
0.932149
0.261293
2.34965
0.753294
0.905066
2.92199
0.984998
0.348671
2.01129
1.99281
0.789231
0.898312
0.347589
0.162176
0.282951
0.991681
0.700819
0.905688
0.390344
0.635726
0.381621
3.28508
0.491355
0.457583
0.663086
0.271327
0.188754
0.968686
0.110752
0.353093
0.254446
0.322424
0.192684
0.139274
0.440611
0.201159
0.596358
0.122806
0.2317
0.514506
0.483364
0.757456
0.674008
0.160357
0.26827
0.723965
0.0176072
0.20431
0.111106
0.423525
0.624348
0.537709
1.31294
0.454934
1.03685
0.471927
0.504319
1.12369
0.350874
0.507645
0.437773
0.324039
0.558054
0.765747
0.439662
0.252189
0.294266
0.439117
3.13399
0.195387
0.308107
0.613
0.838447
0.826092
1.04706
0.263899
0.846501
0.406483
1.14688
0.598527
0.58995
0.0372641
1.55924
0.995235
0.250845
1.09605
2.03972
0.444517
1.13262
0.810693
0.843656
2.80766
1.07889
1.56011
1.13152
4.15378
2.92141
2.49015
0.221321
1.40993
0.463355
0.412661
0.267539
0.934241
0.489206
0.470421
1.3259
0.611588
0.405475
0.214756
0.649424
0.476004
1.03824
1.00052
0.713816
2.39895
0.385042
0.561524
1.30707
0.480968
1.07578
0.78155
1.15351
1.69571
2.74714
0.26181
0.617702
1.1072
2.32493
0.794728
0.461955
2.88398
1.23147
0.496093
1.68438
0.630688
1.12309
2.65272
0.528414
0.161531
2.6899
1.02986
1.87828
0.826339
0.557634
1.56506
1.79618
1.57732
0.595689
2.82406
1.41808
1.15062
1.07251
0.585555
0.201157
2.08478
1.24003
0.253553
1.68566
0.1553
1.05188
0.201739
1.20314
0.982107
1.55235
0.842456
1.0276
4.21403
0.637994
0.427763
3.30259
4.98449
1.67214
3.80503
1.60626
0.922064
1.20247
0.0486076
1.67526
2.0612
0.241673
0.306672
2.18658
0.977278
0.629154
0.152336
2.72257
0.792907
0.639678
1.34649
2.44448
3.20581
1.84105
1.29532
1.07464
1.06009
0.271946
1.76349
0.728781
2.47643
1.14742
0.684629
0.963434
0.661007
2.67368
0.585264
2.99044
1.19221
0.640827
2.04703
0.797565
0.778303
0.860006
0.862104
1.52462
0.876473
0.561922
0.553303
0.797838
2.57553
0.870654
1.99779
0.651017
2.15474
0.391914
0.511338
1.43976
0.719698
0.681954
4.86637
4.11249
2.11658
2.75634
6.99571
4.76364
2.80293
4.17754
1.72217
0.785763
1.29221
0.913687
4.78454
6.80319
4.40181
0.837369
1.4452
1.73774
0.554926
0.563213
0.126518
1.15197
0.431245
1.07991
4.35785
2.64556
4.40846
3.12521
3.6095
6.64441
6.08973
4.4794
3.90465
5.62205
3.29533
2.90305
1.08894
0.584128
0.425715
0.302784
0.278696
0.370067
0.260662
0.922395
1.91025
0.514846
1.38033
3.40237
3.65673
2.1379
2.2394
5.23165
5.33491
5.81066
4.12641
2.21599
1.9294
0.402964
4.5192
7.46458
5.28777
4.32405
2.51442
0.775823
1.71779
6.49879
6.36873
5.76766
5.77664
3.78027
4.87717
4.37115
0.511406
1.60358
0.465789
1.2626
0.316932
0.371741
0.568808
0.176878
0.516766
2.67704
3.37062
2.41452
1.51491
1.37161
1.12129
1.25184
0.539046
1.3928
1.61557
1.5085
0.427388
4.07234
1.8594
2.0302
1.87325
3.54341
3.06429
4.78316
2.90593
1.28785
5.27072
3.35182
2.17019
1.40314
2.84094
1.06877
2.27331
1.67476
1.25132
1.51866
3.72586
1.54641
3.62459
1.18263
0.967578
0.251664
0.141635
0.726383
0.274772
0.346608
0.103796
0.155813
0.296202
0.148737
0.335279
0.282632
0.197568
0.776311
3.08637
4.29625
4.67541
4.93178
4.25256
3.60762
3.84582
6.17552
4.68794
2.02882
2.1605
1.63768
0.726869
2.18769
0.569986
1.32382
0.19802
0.118532
0.105464
0.0689492
0.33337
0.0673198
0.188298
10.8709
1.02699
0.413111
0.599875
0.194189
0.426625
0.96685
0.617452
0.0947192
0.13372
0.559099
0.728215
0.851633
0.640807
0.425038
0.10765
0.400303
0.158751
0.165079
0.143922
0.276212
1.09953
0.119296
0.372475
0.248195
0.134783
0.410148
1.09079
0.52325
0.766171
0.279065
0.606696
1.1769
2.11481
2.09538
2.54756
0.313989
0.572026
0.280591
0.191607
0.415431
0.375569
0.839902
0.154515
0.0953736
1.41247
0.32084
0.393436
0.258962
2.55888
0.382582
0.520463
1.01372
0.581947
0.220292
2.23892
2.34505
0.44227
1.15873
1.1813
0.971887
0.108203
0.7723
2.79495
4.20201
4.74199
3.79552
0.653338
1.98286
1.26973
0.889811
0.505714
1.02814
1.64762
0.498993
3.11511
3.69895
3.94941
3.70066
1.82877
0.1719
0.138386
0.923511
2.9406
1.39862
0.745976
0.778145
1.32785
0.272502
0.346505
0.557706
0.302781
1.151
2.70452
5.23552
4.52541
3.33383
3.4397
1.16897
0.544444
2.57978
5.28927
6.04721
4.06903
4.19287
5.15173
5.03361
2.05122
0.88103
0.253443
0.177381
0.184466
0.160929
0.178094
0.0795975
0.0549261
0.702481
1.78665
1.33287
1.97914
1.57535
0.359104
0.1446
0.251562
2.4967
2.85517
0.86066
0.631827
0.37424
0.298923
2.18851
0.792437
1.44702
0.270771
0.437318
1.30733
2.06715
1.35086
1.09026
0.252473
1.92272
4.28748
6.26374
3.8214
3.19202
0.164347
0.437331
0.0237189
0.0576081
0.232213
0.791618
0.182422
1.55905
1.48751
0.53152
0.35693
0.771374
0.821381
0.234319
0.220992
2.28021
2.80546
0.176149
0.5925
3.34051
3.84587
2.63949
1.21644
1.95677
1.06625
0.249294
0.0294795
0.74847
0.369933
2.2588
0.32003
0.152169
4.35635
0.323875
0.0905606
0.967049
0.526761
0.603753
2.46273
0.609421
2.07558
3.49279
2.82143
2.57491
3.81881
2.34929
4.09642
5.30203
2.49755
5.13346
4.86304
4.50803
6.39545
6.07183
6.53607
4.14568
7.08735
5.77998
3.76965
3.20508
1.72902
1.65904
2.12483
2.1368
3.99085
3.48209
1.50061
0.444403
0.63514
1.68097
2.66724
8.34543
7.214
4.64716
7.2819
4.25771
4.59478
4.37459
7.377
0.794756
0.497242
1.28455
0.683574
1.26582
0.903593
0.441539
2.08803
1.40517
0.336241
0.922589
0.843887
1.39812
1.2191
0.36061
1.69192
0.706908
1.14286
0.813837
2.31249
0.318724
0.909423
2.77873
5.09133
0.660322
0.93101
17.5337
0.431216
6.0087
5.42113
1.33252
2.38241
1.14347
0.921801
1.4283
0.78724
1.72995
1.55457
0.510519
0.39425
2.14886
2.76761
0.473252
0.356467
1.07912
1.25053
1.24054
0.898796
0.36448
0.920885
1.15701
0.299751
0.319814
0.0892799
0.747094
0.29037
0.103235
0.324082
0.200925
0.198585
0.315114
0.689495
0.637261
0.112953
0.678533
0.252486
0.679677
1.38137
0.112831
0.500269
0.310144
1.61142
0.451389
0.162171
0.183579
0.37192
0.659198
0.603177
0.747735
1.17068
2.72711
6.83073
6.5995
5.59943
3.91737
3.80834
6.91547
6.16223
6.46879
8.21073
5.59765
5.55027
2.5173
1.61366
2.26453
0.582076
1.40977
0.892025
0.640318
2.60227
1.91179
0.102729
1.49106
1.72702
0.599442
3.10954
0.757432
0.489281
0.551849
0.479739
0.706734
1.91372
5.17385
5.80147
1.72553
1.67301
4.69507
3.80011
0.587799
0.471455
0.618485
1.34686
0.751078
0.291382
0.584866
0.30623
2.49394
0.792922
1.2334
0.453815
1.07704
0.733003
2.28264
1.99464
3.14833
0.333179
1.16018
0.479068
1.44868
1.99959
5.74597
3.58229
4.92158
2.85187
1.47534
0.45787
2.32535
0.799044
1.40335
1.31081
1.7921
1.90275
0.893276
0.474892
0.812087
0.488184
2.19815
0.596712
4.02877
1.25831
0.684581
2.32529
5.76739
5.38075
6.03219
4.73768
5.7162
4.63783
0.771335
2.15826
4.10874
6.62631
5.08793
4.64354
4.96942
8.19582
4.68666
6.118
4.98064
5.01657
4.38802
5.13638
5.47858
1.01063
3.62352
1.15825
1.52407
3.14528
0.429952
0.402763
0.643131
0.441204
0.989601
1.2526
2.33093
2.28996
1.49348
0.655412
2.40617
2.84745
1.31854
0.634006
0.377111
0.419396
0.194108
2.34726
1.33046
1.33173
0.835488
2.03597
1.39666
0.784022
0.391153
0.612869
1.85041
2.83122
0.629018
1.3445
0.274025
1.53002
0.870471
1.92036
1.78335
2.06507
3.27651
5.90503
0.892497
2.2457
5.92374
2.20247
0.927588
1.37343
0.561669
3.17491
3.0225
1.23734
1.1019
1.08759
0.192335
0.974633
0.778223
1.02575
3.41935
0.180198
0.114187
0.102875
0.0110866
0.717978
0.550694
1.22231
0.417177
0.32474
1.05467
0.191806
2.56951
0.279246
0.182816
1.27656
1.0628
1.36266
1.02271
0.449846
1.23985
0.132486
0.507002
1.82198
1.3243
1.77194
4.96719
4.33017
7.7072
4.90784
7.22756
6.00493
10.604
5.88105
5.19563
2.70506
2.50131
3.03825
2.47111
2.23478
0.387269
0.305662
0.44816
0.543777
0.46354
0.935481
1.7371
3.79259
2.35989
1.2974
1.97989
1.06065
0.894856
0.330553
0.796034
0.564749
0.756407
0.176172
0.671966
0.839264
1.07471
1.92424
0.933652
0.787361
1.20401
1.083
2.80121
1.94382
2.03501
0.49056
2.62849
1.21995
2.02446
1.66455
2.69898
3.41431
3.03216
6.8187
8.55293
4.69427
3.40877
0.344991
0.602649
0.227337
0.505978
0.71652
1.09961
0.3898
0.234919
0.761599
3.36509
2.0906
1.20092
0.289021
1.80314
2.13991
2.54188
4.93806
4.0966
3.29531
3.01979
0.283893
1.14017
1.07408
5.38882
6.04928
2.79978
1.03118
0.949606
0.201621
2.12157
7.2055
7.54447
4.59352
0.548863
0.257495
2.70297
0.403545
2.77901
4.63607
5.62381
4.25764
1.89241
1.66778
1.13414
0.429957
0.56497
2.29289
2.65585
3.2616
4.65029
5.6283
4.49437
3.9938
5.54017
6.32834
6.84505
2.94233
1.51595
0.852743
5.64885
1.46059
4.5617
7.19433
7.00173
5.29826
9.85115
9.15588
6.5475
1.4423
1.79863
3.54483
3.84554
1.58421
5.99054
5.13717
4.63632
4.46291
6.83609
7.54157
4.93389
4.56957
5.07928
6.16432
4.81999
2.98963
1.56681
3.46925
2.10348
3.47234
6.96808
6.28053
5.57349
4.71739
7.70546
7.98584
10.9852
6.80857
5.89619
6.52639
5.92963
4.1589
0.394159
2.35671
1.80826
2.8081
2.68695
1.98822
0.214862
0.679043
3.27228
1.22465
1.37261
0.446663
0.330699
0.47265
0.567792
0.714363
1.20322
2.61916
3.4778
4.62976
2.77365
0.343548
0.732163
0.126366
0.148767
1.11889
2.70501
5.36539
5.56393
4.70903
3.65107
4.42642
5.92838
8.97094
1.79512
1.65117
1.71619
1.04497
1.04546
[truncated: 9,937 more rows]

[truncated: 3 more sheets: Mouse 11_Velocity, Mouse 12_Velocity, Mouse 13_Velocity]
