# Supplementary material for: Glutamatergic supramammillary nucleus neurons respond to threatening stressors and promote active coping
Source: eLife. 2024 Jun 3;12:RP90972. doi: 10.7554/eLife.90972 (PMC11147510; doi:10.7554/eLife.90972)
Supplement: Figure 3—source data 1. [file elife-90972-fig3-data1.xlsx]

## Sheet: Figure 3 F and G
	Figure 3 F and G. For each mouse, there are three worksheets (GCaMPs 470, Isosbestic 415, and timestamps for event trials)

## Sheet: Mouse 1_415
FrameCounter	Timestamp	Flags	Region0G
2	2471.29	17	0.0458523
4	2471.34	17	0.0438538
6	2471.39	17	0.0437128
8	2471.44	17	0.0437001
10	2471.49	17	0.0435368
12	2471.54	17	0.0434736
14	2471.59	17	0.0434354
16	2471.64	17	0.0433155
18	2471.69	17	0.0433967
20	2471.74	17	0.0431943
22	2471.79	17	0.0431697
24	2471.84	17	0.0431272
26	2471.89	17	0.0431469
28	2471.94	17	0.0430951
30	2471.99	17	0.0430626
32	2472.04	17	0.0430033
34	2472.09	17	0.0429985
36	2472.14	17	0.0429761
38	2472.19	17	0.04297
40	2472.24	17	0.0429489
42	2472.29	17	0.0429046
44	2472.34	17	0.0429537
46	2472.39	17	0.0428716
48	2472.44	17	0.0429818
50	2472.49	17	0.0428655
52	2472.54	17	0.0427794
54	2472.59	17	0.0427944
56	2472.64	17	0.0427566
58	2472.69	17	0.0427636
60	2472.74	17	0.0426714
62	2472.79	17	0.0426534
64	2472.84	17	0.0425981
66	2472.89	17	0.0425226
68	2472.94	17	0.0425546
70	2472.99	17	0.0424725
72	2473.04	17	0.0424941
74	2473.09	17	0.042509
76	2473.14	17	0.0424453
78	2473.19	17	0.0425094
80	2473.24	17	0.0424282
82	2473.29	17	0.0424717
84	2473.34	17	0.0424747
86	2473.39	17	0.0424681
88	2473.44	17	0.0423777
90	2473.49	17	0.0423487
92	2473.54	17	0.0423334
94	2473.59	17	0.0422741
96	2473.64	17	0.0422987
98	2473.69	17	0.0423663
100	2473.74	17	0.0423017
102	2473.79	17	0.042325
104	2473.84	17	0.0423039
106	2473.89	17	0.042289
108	2473.94	17	0.0422859
110	2473.99	17	0.0423092
112	2474.04	17	0.0422688
114	2474.09	17	0.0422873
116	2474.14	17	0.0422816
118	2474.19	17	0.0422833
120	2474.24	17	0.042228
122	2474.29	17	0.0423035
124	2474.34	17	0.0423039
126	2474.39	17	0.0422754
128	2474.44	17	0.0422715
130	2474.49	17	0.0422183
132	2474.54	17	0.0422754
134	2474.59	17	0.0422025
136	2474.64	17	0.0422732
138	2474.69	17	0.0422201
140	2474.74	17	0.0422368
142	2474.79	17	0.0421924
144	2474.84	17	0.0421841
146	2474.89	17	0.0421318
148	2474.94	17	0.0420752
150	2474.99	17	0.0421981
152	2475.04	17	0.0422126
154	2475.09	17	0.0421757
156	2475.14	17	0.042084
158	2475.19	17	0.0420989
160	2475.24	17	0.0422183
162	2475.29	17	0.0421516
164	2475.34	17	0.0421213
166	2475.39	17	0.0421068
168	2475.44	17	0.0421551
170	2475.49	17	0.0421358
172	2475.54	17	0.042131
174	2475.59	17	0.0420906
176	2475.64	17	0.0420831
178	2475.69	17	0.0420467
180	2475.74	17	0.0420989
182	2475.79	17	0.0420704
184	2475.84	17	0.0420278
186	2475.89	17	0.0420155
188	2475.94	17	0.0420234
190	2475.99	17	0.0420445
192	2476.04	17	0.042055
194	2476.09	17	0.041972
196	2476.14	17	0.0420774
198	2476.19	17	0.0420186
200	2476.24	17	0.0420936
202	2476.29	17	0.0419975
204	2476.34	17	0.0419984
206	2476.39	17	0.0419672
208	2476.44	17	0.0419444
210	2476.49	17	0.0419861
212	2476.54	17	0.0419992
214	2476.59	17	0.0420519
216	2476.64	17	0.0419839
218	2476.69	17	0.0420102
220	2476.74	17	0.0420287
222	2476.79	17	0.0420058
224	2476.84	17	0.0420291
226	2476.89	17	0.0419571
228	2476.94	17	0.0419808
230	2476.99	17	0.0419549
232	2477.04	17	0.0419281
234	2477.09	17	0.0419492
236	2477.14	17	0.0419132
238	2477.19	17	0.0418614
240	2477.24	17	0.0418469
242	2477.29	17	0.0418372
244	2477.34	17	0.0417771
246	2477.39	17	0.0417815
248	2477.44	17	0.0417824
250	2477.49	17	0.0418487
252	2477.54	17	0.04185
254	2477.59	17	0.0418614
256	2477.64	17	0.0418855
258	2477.69	17	0.0418236
260	2477.74	17	0.0418337
262	2477.79	17	0.0419242
264	2477.84	17	0.0418996
266	2477.89	17	0.0418759
268	2477.94	17	0.0418899
270	2477.99	17	0.0418557
272	2478.04	17	0.041853
274	2478.09	17	0.0417573
276	2478.14	17	0.0417696
278	2478.19	17	0.0417578
280	2478.24	17	0.0417608
282	2478.29	17	0.0417578
284	2478.34	17	0.0416814
286	2478.39	17	0.0416906
288	2478.44	17	0.0417187
290	2478.49	17	0.0417644
292	2478.54	17	0.0417705
294	2478.59	17	0.0417323
296	2478.64	17	0.0417613
298	2478.69	17	0.0418574
300	2478.74	17	0.0418004
302	2478.79	17	0.0418429
304	2478.84	17	0.0417973
306	2478.89	17	0.0417652
308	2478.94	17	0.041745
310	2478.99	17	0.0417042
312	2479.04	17	0.0416884
314	2479.09	17	0.0416111
316	2479.14	17	0.0416072
318	2479.19	17	0.0415624
320	2479.24	17	0.0415334
322	2479.29	17	0.0416603
324	2479.34	17	0.0416291
326	2479.39	17	0.0416344
328	2479.44	17	0.0415734
330	2479.49	17	0.0415668
332	2479.54	17	0.0415483
334	2479.59	17	0.0415519
336	2479.64	17	0.0415404
338	2479.69	17	0.0415589
340	2479.74	17	0.0414759
342	2479.79	17	0.041432
344	2479.84	17	0.0414188
346	2479.89	17	0.0414223
348	2479.94	17	0.0413635
350	2479.99	17	0.0412665
352	2480.04	17	0.0411646
354	2480.09	17	0.041007
356	2480.14	17	0.0410575
358	2480.19	17	0.0409903
360	2480.24	17	0.0410224
362	2480.29	17	0.0410408
364	2480.34	17	0.0410961
366	2480.39	17	0.0411084
368	2480.44	17	0.0412454
370	2480.49	17	0.041306
372	2480.54	17	0.0413683
374	2480.59	17	0.0413464
376	2480.64	17	0.041342
378	2480.69	17	0.0413841
380	2480.74	17	0.0413947
382	2480.79	17	0.0413569
384	2480.84	17	0.0413262
386	2480.89	17	0.0413073
388	2480.94	17	0.0412625
390	2480.99	17	0.0413069
392	2481.04	17	0.0413034
394	2481.09	17	0.0412458
396	2481.14	17	0.0413016
398	2481.19	17	0.0412283
400	2481.24	17	0.0412695
402	2481.29	17	0.0413477
404	2481.34	17	0.0413749
406	2481.39	17	0.0413214
408	2481.44	17	0.0413244
410	2481.49	17	0.0412845
412	2481.54	17	0.0413244
414	2481.59	17	0.0412559
416	2481.64	17	0.0413095
418	2481.69	17	0.0413121
420	2481.74	17	0.0413113
422	2481.79	17	0.041266
424	2481.84	17	0.0413543
426	2481.89	17	0.0413297
428	2481.94	17	0.0412634
430	2481.99	17	0.041252
432	2482.04	17	0.0412274
434	2482.09	17	0.0412335
436	2482.14	17	0.0412292
438	2482.19	17	0.041241
440	2482.24	17	0.0412125
442	2482.29	17	0.0411997
444	2482.34	17	0.0411932
446	2482.39	17	0.0411664
448	2482.44	17	0.0411677
450	2482.49	17	0.0412296
452	2482.54	17	0.041266
454	2482.59	17	0.0412199
456	2482.64	17	0.0412011
458	2482.69	17	0.041241
460	2482.74	17	0.0411242
462	2482.79	17	0.0411611
464	2482.84	17	0.0411703
466	2482.89	17	0.0411765
468	2482.94	17	0.0411971
470	2482.99	17	0.0411233
472	2483.04	17	0.0411277
474	2483.09	17	0.0411782
476	2483.14	17	0.0411585
478	2483.19	17	0.0410996
480	2483.24	17	0.0411541
482	2483.29	17	0.0411194
484	2483.34	17	0.041104
486	2483.39	17	0.0411014
488	2483.44	17	0.0411383
490	2483.49	17	0.0411102
492	2483.54	17	0.0411093
494	2483.59	17	0.041108
496	2483.64	17	0.0411541
498	2483.69	17	0.0410175
500	2483.74	17	0.041108
502	2483.79	17	0.0411062
504	2483.84	17	0.0410382
506	2483.89	17	0.0410557
508	2483.94	17	0.0410316
510	2483.99	17	0.0409613
512	2484.04	17	0.0410628
514	2484.09	17	0.0411018
516	2484.14	17	0.0411163
518	2484.19	17	0.0410443
520	2484.24	17	0.0410131
522	2484.29	17	0.0410294
524	2484.34	17	0.0409012
526	2484.39	17	0.0409824
528	2484.44	17	0.0410202
530	2484.49	17	0.0409969
532	2484.54	17	0.0410171
534	2484.59	17	0.0409886
536	2484.64	17	0.0409552
538	2484.69	17	0.0410039
540	2484.74	17	0.0409956
542	2484.79	17	0.0409381
544	2484.84	17	0.0409846
546	2484.89	17	0.0409732
548	2484.94	17	0.0409679
550	2484.99	17	0.041007
552	2485.04	17	0.0409596
554	2485.09	17	0.0409613
556	2485.14	17	0.0409187
558	2485.19	17	0.0409578
560	2485.24	17	0.0409209
562	2485.29	17	0.040906
564	2485.34	17	0.0409578
566	2485.39	17	0.0409091
568	2485.44	17	0.0409056
570	2485.49	17	0.0408744
572	2485.54	17	0.040852
574	2485.59	17	0.040845
576	2485.64	17	0.0409209
578	2485.69	17	0.0409447
580	2485.74	17	0.0408871
582	2485.79	17	0.0408937
584	2485.84	17	0.0409868
586	2485.89	17	0.0409337
588	2485.94	17	0.0408924
590	2485.99	17	0.0409262
592	2486.04	17	0.0409051
594	2486.09	17	0.0408937
596	2486.14	17	0.0408775
598	2486.19	17	0.0408516
600	2486.24	17	0.0408129
602	2486.29	17	0.0407949
604	2486.34	17	0.0407787
606	2486.39	17	0.0407901
608	2486.44	17	0.0407651
610	2486.49	17	0.0407919
612	2486.54	17	0.040827
614	2486.59	17	0.0407581
616	2486.64	17	0.040737
618	2486.69	17	0.0407682
620	2486.74	17	0.0407787
622	2486.79	17	0.0407581
624	2486.84	17	0.0408204
626	2486.89	17	0.0407725
628	2486.94	17	0.0407519
630	2486.99	17	0.0407668
632	2487.04	17	0.0407471
634	2487.09	17	0.0407739
636	2487.14	17	0.0407493
638	2487.19	17	0.0407357
640	2487.24	17	0.0407581
642	2487.29	17	0.0407664
644	2487.34	17	0.0407361
646	2487.39	17	0.040712
648	2487.44	17	0.0407892
650	2487.49	17	0.0407005
652	2487.54	17	0.0406852
654	2487.59	17	0.0406812
656	2487.64	17	0.0406733
658	2487.69	17	0.0406272
660	2487.74	17	0.0405745
662	2487.79	17	0.0406593
664	2487.84	17	0.0406549
666	2487.89	17	0.0407168
668	2487.94	17	0.0406154
670	2487.99	17	0.0405776
672	2488.04	17	0.0406114
674	2488.09	17	0.0406193
676	2488.14	17	0.0406228
678	2488.19	17	0.0406
680	2488.24	17	0.0406176
682	2488.29	17	0.0406246
684	2488.34	17	0.0406312
686	2488.39	17	0.0406162
688	2488.44	17	0.0406351
690	2488.49	17	0.0405772
692	2488.54	17	0.040697
694	2488.59	17	0.0406272
696	2488.64	17	0.0405943
698	2488.69	17	0.0405706
700	2488.74	17	0.0405201
702	2488.79	17	0.0405113
704	2488.84	17	0.0405579
706	2488.89	17	0.0405091
708	2488.94	17	0.0404951
710	2488.99	17	0.0405842
712	2489.04	17	0.0406698
714	2489.09	17	0.0406957
716	2489.14	17	0.0406584
718	2489.19	17	0.0405548
720	2489.24	17	0.0405767
722	2489.29	17	0.0405521
724	2489.34	17	0.0405816
726	2489.39	17	0.0404415
728	2489.44	17	0.0404696
730	2489.49	17	0.0405069
732	2489.54	17	0.0404951
734	2489.59	17	0.0405807
736	2489.64	17	0.0405372
738	2489.69	17	0.0405737
740	2489.74	17	0.0405763
742	2489.79	17	0.0405851
744	2489.84	17	0.0405903
746	2489.89	17	0.0406566
748	2489.94	17	0.0406716
750	2489.99	17	0.0405627
752	2490.04	17	0.0405381
754	2490.09	17	0.040604
756	2490.14	17	0.0405025
758	2490.19	17	0.040539
760	2490.24	17	0.0405166
762	2490.29	17	0.0405175
764	2490.34	17	0.0404916
766	2490.39	17	0.0404617
768	2490.44	17	0.0404187
770	2490.49	17	0.0404007
772	2490.54	17	0.0404112
774	2490.59	17	0.0404165
776	2490.64	17	0.0404498
778	2490.69	17	0.0405319
780	2490.74	17	0.0404415
782	2490.79	17	0.0404858
784	2490.84	17	0.0404393
786	2490.89	17	0.0404016
788	2490.94	17	0.0402874
790	2490.99	17	0.0404178
792	2491.04	17	0.0403998
794	2491.09	17	0.0403475
796	2491.14	17	0.0403647
798	2491.19	17	0.0403238
800	2491.24	17	0.0403282
802	2491.29	17	0.0404002
804	2491.34	17	0.0404134
806	2491.39	17	0.0404393
808	2491.44	17	0.0404635
810	2491.49	17	0.0404547
812	2491.54	17	0.0404942
814	2491.59	17	0.0404433
816	2491.64	17	0.0405052
818	2491.69	17	0.0403985
820	2491.74	17	0.0404217
822	2491.79	17	0.0404643
824	2491.84	17	0.0404108
826	2491.89	17	0.0404389
828	2491.94	17	0.0404275
830	2491.99	17	0.0403818
832	2492.04	17	0.0403958
834	2492.09	17	0.0404086
836	2492.14	17	0.0404147
838	2492.19	17	0.0404959
840	2492.24	17	0.0404569
842	2492.29	17	0.0404178
844	2492.34	17	0.0404327
846	2492.39	17	0.0404692
848	2492.44	17	0.040438
850	2492.49	17	0.0404376
852	2492.54	17	0.0404538
854	2492.59	17	0.0404244
856	2492.64	17	0.040434
858	2492.69	17	0.0404222
860	2492.74	17	0.040409
862	2492.79	17	0.0403818
864	2492.84	17	0.0403159
866	2492.89	17	0.0403151
868	2492.94	17	0.0402553
870	2492.99	17	0.0401706
872	2493.04	17	0.0401271
874	2493.09	17	0.0401781
876	2493.14	17	0.0401965
878	2493.19	17	0.0402005
880	2493.24	17	0.040218
882	2493.29	17	0.0401684
884	2493.34	17	0.0401131
886	2493.39	17	0.0401175
888	2493.44	17	0.0400942
890	2493.49	17	0.0401245
892	2493.54	17	0.0400038
894	2493.59	17	0.0400306
896	2493.64	17	0.0400231
898	2493.69	17	0.0399687
900	2493.74	17	0.0400696
902	2493.79	17	0.0401048
904	2493.84	17	0.0401912
906	2493.89	17	0.0401592
908	2493.94	17	0.0401785
910	2493.99	17	0.0402316
912	2494.04	17	0.0401855
914	2494.09	17	0.0401847
916	2494.14	17	0.0401842
918	2494.19	17	0.0401842
920	2494.24	17	0.040204
922	2494.29	17	0.0402145
924	2494.34	17	0.0402018
926	2494.39	17	0.0402312
928	2494.44	17	0.0402685
930	2494.49	17	0.0401816
932	2494.54	17	0.0401978
934	2494.59	17	0.0402136
936	2494.64	17	0.040247
938	2494.69	17	0.0402189
940	2494.74	17	0.040272
942	2494.79	17	0.0402057
944	2494.84	17	0.0401956
946	2494.89	17	0.0402114
948	2494.94	17	0.0401346
950	2494.99	17	0.0401351
952	2495.04	17	0.0401535
954	2495.09	17	0.0400323
956	2495.14	17	0.0400692
958	2495.19	17	0.039959
960	2495.24	17	0.0399028
962	2495.29	17	0.0398791
964	2495.34	17	0.0399397
966	2495.39	17	0.039984
968	2495.44	17	0.0399783
970	2495.49	17	0.0399989
972	2495.54	17	0.0400999
974	2495.59	17	0.0400696
976	2495.64	17	0.0400758
978	2495.69	17	0.040114
980	2495.74	17	0.0400933
982	2495.79	17	0.039995
984	2495.84	17	0.0400055
986	2495.89	17	0.0400674
988	2495.94	17	0.0400301
990	2495.99	17	0.0400073
992	2496.04	17	0.040042
994	2496.09	17	0.0399559
996	2496.14	17	0.0399493
998	2496.19	17	0.0399893
1000	2496.24	17	0.0399379
1002	2496.29	17	0.0399375
1004	2496.34	17	0.0399467
1006	2496.39	17	0.040002
1008	2496.44	17	0.0399107
1010	2496.49	17	0.0400064
1012	2496.54	17	0.0399682
1014	2496.59	17	0.0400354
1016	2496.64	17	0.040002
1018	2496.69	17	0.0400209
1020	2496.74	17	0.0399932
1022	2496.79	17	0.0399875
1024	2496.84	17	0.0399893
1026	2496.89	17	0.0399375
1028	2496.94	17	0.0400011
1030	2496.99	17	0.0399919
1032	2497.04	17	0.0399247
1034	2497.09	17	0.0398927
1036	2497.14	17	0.0399458
1038	2497.19	17	0.0399401
1040	2497.24	17	0.0399436
1042	2497.29	17	0.0398822
1044	2497.34	17	0.0400029
1046	2497.39	17	0.0400047
1048	2497.44	17	0.0399568
1050	2497.49	17	0.040071
1052	2497.54	17	0.0399094
1054	2497.59	17	0.03997
1056	2497.64	17	0.039883
1058	2497.69	17	0.0399111
1060	2497.74	17	0.0398571
1062	2497.79	17	0.0398931
1064	2497.84	17	0.0398817
1066	2497.89	17	0.0398813
1068	2497.94	17	0.0399186
1070	2497.99	17	0.0398571
1072	2498.04	17	0.0398923
1074	2498.09	17	0.0398909
1076	2498.14	17	0.0399717
1078	2498.19	17	0.0398984
1080	2498.24	17	0.039898
1082	2498.29	17	0.0398598
1084	2498.34	17	0.0398945
1086	2498.39	17	0.0398264
1088	2498.44	17	0.0398782
1090	2498.49	17	0.0399138
1092	2498.54	17	0.0398549
1094	2498.59	17	0.0399335
1096	2498.64	17	0.0399388
1098	2498.69	17	0.0399704
1100	2498.74	17	0.0399963
1102	2498.79	17	0.0400025
1104	2498.84	17	0.0399801
1106	2498.89	17	0.0399836
1108	2498.94	17	0.039977
1110	2498.99	17	0.0399335
1112	2499.04	17	0.0398988
1114	2499.09	17	0.039898
1116	2499.14	17	0.0399375
1118	2499.19	17	0.0399831
1120	2499.24	17	0.0399985
1122	2499.29	17	0.0399924
1124	2499.34	17	0.039919
1126	2499.39	17	0.0398743
1128	2499.44	17	0.0399305
1130	2499.49	17	0.0399085
1132	2499.54	17	0.0399761
1134	2499.59	17	0.0398492
1136	2499.64	17	0.0398532
1138	2499.69	17	0.0398694
1140	2499.74	17	0.0398637
1142	2499.79	17	0.0399322
1144	2499.84	17	0.0398892
1146	2499.89	17	0.0398453
1148	2499.94	17	0.0398238
1150	2499.99	17	0.039858
1152	2500.04	17	0.0398602
1154	2500.09	17	0.0399111
1156	2500.14	17	0.039862
1158	2500.19	17	0.0398611
1160	2500.24	17	0.0398492
1162	2500.29	17	0.0398448
1164	2500.34	17	0.0398211
1166	2500.39	17	0.0398018
1168	2500.44	17	0.0397878
1170	2500.49	17	0.0398106
1172	2500.54	17	0.0397654
1174	2500.59	17	0.0397654
1176	2500.64	17	0.0397267
1178	2500.69	17	0.0397373
1180	2500.74	17	0.0398207
1182	2500.79	17	0.0397711
1184	2500.84	17	0.0396973
1186	2500.89	17	0.039559
1188	2500.94	17	0.0396424
1190	2500.99	17	0.0396056
1192	2501.04	17	0.0395248
1194	2501.09	17	0.039451
1196	2501.14	17	0.0394137
1198	2501.19	17	0.039444
1200	2501.24	17	0.0394185
1202	2501.29	17	0.0394545
1204	2501.34	17	0.0396165
1206	2501.39	17	0.0397518
1208	2501.44	17	0.0397807
1210	2501.49	17	0.0397373
1212	2501.54	17	0.0397878
1214	2501.59	17	0.0398097
1216	2501.64	17	0.0398211
1218	2501.69	17	0.0397913
1220	2501.74	17	0.0397513
1222	2501.79	17	0.0397807
1224	2501.84	17	0.0397403
1226	2501.89	17	0.0397715
1228	2501.94	17	0.0397583
1230	2501.99	17	0.0397324
1232	2502.04	17	0.0397087
1234	2502.09	17	0.0396525
1236	2502.14	17	0.0396925
1238	2502.19	17	0.0397087
1240	2502.24	17	0.0396262
1242	2502.29	17	0.0396165
1244	2502.34	17	0.0396543
1246	2502.39	17	0.0397706
1248	2502.44	17	0.039721
1250	2502.49	17	0.0397232
1252	2502.54	17	0.0397904
1254	2502.59	17	0.0397513
1256	2502.64	17	0.0397052
1258	2502.69	17	0.0397074
1260	2502.74	17	0.0397285
1262	2502.79	17	0.0396209
1264	2502.84	17	0.0396468
1266	2502.89	17	0.0396477
1268	2502.94	17	0.0396508
1270	2502.99	17	0.0396385
1272	2503.04	17	0.0396486
1274	2503.09	17	0.0396341
1276	2503.14	17	0.0395511
1278	2503.19	17	0.0395783
1280	2503.24	17	0.0395849
1282	2503.29	17	0.039487
1284	2503.34	17	0.0395331
1286	2503.39	17	0.0394651
1288	2503.44	17	0.0394883
1290	2503.49	17	0.0394444
1292	2503.54	17	0.0394545
1294	2503.59	17	0.0394532
1296	2503.64	17	0.0394027
1298	2503.69	17	0.0394567
1300	2503.74	17	0.0394444
1302	2503.79	17	0.039383
1304	2503.84	17	0.0394133
1306	2503.89	17	0.0394071
1308	2503.94	17	0.0394212
1310	2503.99	17	0.0394409
1312	2504.04	17	0.0394054
1314	2504.09	17	0.0394576
1316	2504.14	17	0.0393975
1318	2504.19	17	0.0394269
1320	2504.24	17	0.0394141
1322	2504.29	17	0.0394659
1324	2504.34	17	0.0395744
1326	2504.39	17	0.0394668
1328	2504.44	17	0.0394954
1330	2504.49	17	0.0395055
1332	2504.54	17	0.039523
1334	2504.59	17	0.0394594
1336	2504.64	17	0.0394817
1338	2504.69	17	0.0393856
1340	2504.74	17	0.0393742
1342	2504.79	17	0.0393689
1344	2504.84	17	0.0394115
1346	2504.89	17	0.0393312
1348	2504.94	17	0.0392916
1350	2504.99	17	0.0392455
1352	2505.04	17	0.0392275
1354	2505.09	17	0.0390682
1356	2505.14	17	0.0390322
1358	2505.19	17	0.0389861
1360	2505.24	17	0.0390177
1362	2505.29	17	0.0389606
1364	2505.34	17	0.0390774
1366	2505.39	17	0.0389268
1368	2505.44	17	0.0389101
1370	2505.49	17	0.038832
1372	2505.54	17	0.0390058
1374	2505.59	17	0.0389619
1376	2505.64	17	0.0388135
1378	2505.69	17	0.038922
1380	2505.74	17	0.0389307
1382	2505.79	17	0.0388803
1384	2505.84	17	0.0390528
1386	2505.89	17	0.0390638
1388	2505.94	17	0.0390453
1390	2505.99	17	0.0389786
1392	2506.04	17	0.0389672
1394	2506.09	17	0.0390778
1396	2506.14	17	0.0392166
1398	2506.19	17	0.03921
1400	2506.24	17	0.0393074
1402	2506.29	17	0.0392886
1404	2506.34	17	0.039271
1406	2506.39	17	0.0393268
1408	2506.44	17	0.0392192
1410	2506.49	17	0.0392473
1412	2506.54	17	0.0392912
1414	2506.59	17	0.039307
1416	2506.64	17	0.0393755
1418	2506.69	17	0.0393689
1420	2506.74	17	0.0393088
1422	2506.79	17	0.0392793
1424	2506.84	17	0.0392565
1426	2506.89	17	0.0391836
1428	2506.94	17	0.0391389
1430	2506.99	17	0.0390423
1432	2507.04	17	0.0390923
1434	2507.09	17	0.0390172
1436	2507.14	17	0.0389729
1438	2507.19	17	0.0391007
1440	2507.24	17	0.0390954
1442	2507.29	17	0.0391024
1444	2507.34	17	0.0391371
1446	2507.39	17	0.0391775
1448	2507.44	17	0.0391889
1450	2507.49	17	0.0391792
1452	2507.54	17	0.0391986
1454	2507.59	17	0.0391823
1456	2507.64	17	0.0391248
1458	2507.69	17	0.0391099
1460	2507.74	17	0.0391481
1462	2507.79	17	0.0391156
1464	2507.84	17	0.0390313
1466	2507.89	17	0.0390721
1468	2507.94	17	0.0390515
1470	2507.99	17	0.0390559
1472	2508.04	17	0.0390581
1474	2508.09	17	0.0390559
1476	2508.14	17	0.0390269
1478	2508.19	17	0.0389566
1480	2508.24	17	0.0389053
1482	2508.29	17	0.0389523
1484	2508.34	17	0.0389887
1486	2508.39	17	0.0389483
1488	2508.44	17	0.0389896
1490	2508.49	17	0.0389856
1492	2508.54	17	0.0389773
1494	2508.59	17	0.0390366
1496	2508.64	17	0.0390431
1498	2508.69	17	0.0389834
1500	2508.74	17	0.0389514
1502	2508.79	17	0.0389474
1504	2508.84	17	0.0389755
1506	2508.89	17	0.0389694
1508	2508.94	17	0.0389729
1510	2508.99	17	0.0389202
1512	2509.04	17	0.0389413
1514	2509.09	17	0.0389013
1516	2509.14	17	0.0389259
1518	2509.19	17	0.0388249
1520	2509.24	17	0.0388113
1522	2509.29	17	0.038781
1524	2509.34	17	0.0386243
1526	2509.39	17	0.0385646
1528	2509.44	17	0.0385606
1530	2509.49	17	0.0385461
1532	2509.54	17	0.0386304
1534	2509.59	17	0.038594
1536	2509.64	17	0.0385975
1538	2509.69	17	0.0386006
1540	2509.74	17	0.0385483
1542	2509.79	17	0.0385281
1544	2509.84	17	0.0385338
1546	2509.89	17	0.0384812
1548	2509.94	17	0.038428
1550	2509.99	17	0.0384719
1552	2510.04	17	0.0384355
1554	2510.09	17	0.0385093
1556	2510.14	17	0.0384711
1558	2510.19	17	0.0385132
1560	2510.24	17	0.0385804
1562	2510.29	17	0.0385189
1564	2510.34	17	0.038428
1566	2510.39	17	0.0384175
1568	2510.44	17	0.0383218
1570	2510.49	17	0.0384004
1572	2510.54	17	0.03841
1574	2510.59	17	0.0384869
1576	2510.64	17	0.0383099
1578	2510.69	17	0.0383213
1580	2510.74	17	0.0382094
1582	2510.79	17	0.0382669
1584	2510.84	17	0.0383604
1586	2510.89	17	0.0383156
1588	2510.94	17	0.0382823
1590	2510.99	17	0.0384149
1592	2511.04	17	0.0384737
1594	2511.09	17	0.0385861
1596	2511.14	17	0.0385426
1598	2511.19	17	0.0385619
1600	2511.24	17	0.0386037
1602	2511.29	17	0.0386287
1604	2511.34	17	0.0386858
1606	2511.39	17	0.03872
1608	2511.44	17	0.0387042
1610	2511.49	17	0.0386923
1612	2511.54	17	0.0386945
1614	2511.59	17	0.0386282
1616	2511.64	17	0.0386642
1618	2511.69	17	0.0386265
1620	2511.74	17	0.0386642
1622	2511.79	17	0.0386225
1624	2511.84	17	0.0386388
1626	2511.89	17	0.0386748
1628	2511.94	17	0.0386603
1630	2511.99	17	0.0386831
1632	2512.04	17	0.0387433
1634	2512.09	17	0.0387608
1636	2512.14	17	0.0387459
1638	2512.19	17	0.0387081
1640	2512.24	17	0.0387766
1642	2512.29	17	0.0387819
1644	2512.34	17	0.0388451
1646	2512.39	17	0.0387512
1648	2512.44	17	0.0387556
1650	2512.49	17	0.0388083
1652	2512.54	17	0.0387209
1654	2512.59	17	0.0387143
1656	2512.64	17	0.0387134
1658	2512.69	17	0.038749
1660	2512.74	17	0.0386313
1662	2512.79	17	0.0385593
1664	2512.84	17	0.0385237
1666	2512.89	17	0.038446
1668	2512.94	17	0.0383508
1670	2512.99	17	0.0382875
1672	2513.04	17	0.0382085
1674	2513.09	17	0.0381936
1676	2513.14	17	0.0382182
1678	2513.19	17	0.0382801
1680	2513.24	17	0.0383837
1682	2513.29	17	0.0384807
1684	2513.34	17	0.0385264
1686	2513.39	17	0.038576
1688	2513.44	17	0.0386493
1690	2513.49	17	0.0386173
1692	2513.54	17	0.0386664
1694	2513.59	17	0.0385958
1696	2513.64	17	0.0386629
1698	2513.69	17	0.0387086
1700	2513.74	17	0.0386678
1702	2513.79	17	0.0385971
1704	2513.84	17	0.0385527
1706	2513.89	17	0.0384452
1708	2513.94	17	0.0384333
1710	2513.99	17	0.0383872
1712	2514.04	17	0.03841
1714	2514.09	17	0.0384346
1716	2514.14	17	0.0384592
1718	2514.19	17	0.0384346
1720	2514.24	17	0.0384676
1722	2514.29	17	0.0384864
1724	2514.34	17	0.038457
1726	2514.39	17	0.0385281
1728	2514.44	17	0.0385106
1730	2514.49	17	0.0385672
1732	2514.54	17	0.0385128
1734	2514.59	17	0.0385404
1736	2514.64	17	0.0385554
1738	2514.69	17	0.0385158
1740	2514.74	17	0.0385325
1742	2514.79	17	0.0385053
1744	2514.84	17	0.0385488
1746	2514.89	17	0.0385637
1748	2514.94	17	0.0384882
1750	2514.99	17	0.0385619
1752	2515.04	17	0.0385382
1754	2515.09	17	0.0385672
1756	2515.14	17	0.0385975
1758	2515.19	17	0.038655
1760	2515.24	17	0.0386476
1762	2515.29	17	0.0386976
1764	2515.34	17	0.0386397
1766	2515.39	17	0.0385488
1768	2515.44	17	0.038565
1770	2515.49	17	0.0385712
1772	2515.54	17	0.0385378
1774	2515.59	17	0.0384926
1776	2515.64	17	0.0384153
1778	2515.69	17	0.0384408
1780	2515.74	17	0.0383503
1782	2515.79	17	0.0384105
1784	2515.84	17	0.0383609
1786	2515.89	17	0.038374
1788	2515.94	17	0.038403
1790	2515.99	17	0.0383622
1792	2516.04	17	0.038425
1794	2516.09	17	0.0383749
1796	2516.14	17	0.0384399
1798	2516.19	17	0.0383446
1800	2516.24	17	0.0384184
1802	2516.29	17	0.038367
1804	2516.34	17	0.0384114
1806	2516.39	17	0.0384737
1808	2516.44	17	0.0384772
1810	2516.49	17	0.0384359
1812	2516.54	17	0.038464
1814	2516.59	17	0.0385286
1816	2516.64	17	0.0384768
1818	2516.69	17	0.0384776
1820	2516.74	17	0.038497
1822	2516.79	17	0.038486
1824	2516.84	17	0.0384627
1826	2516.89	17	0.0384359
1828	2516.94	17	0.0384719
1830	2516.99	17	0.0385071
1832	2517.04	17	0.0384711
1834	2517.09	17	0.0384078
1836	2517.14	17	0.0384034
1838	2517.19	17	0.0384522
1840	2517.24	17	0.0385022
1842	2517.29	17	0.0385018
1844	2517.34	17	0.0384693
1846	2517.39	17	0.0384083
1848	2517.44	17	0.0384768
1850	2517.49	17	0.0384373
1852	2517.54	17	0.0383925
1854	2517.59	17	0.0383235
1856	2517.64	17	0.0383196
1858	2517.69	17	0.0383547
1860	2517.74	17	0.0382985
1862	2517.79	17	0.0382717
1864	2517.84	17	0.0383354
1866	2517.89	17	0.0383244
1868	2517.94	17	0.0382432
1870	2517.99	17	0.0383266
1872	2518.04	17	0.038306
1874	2518.09	17	0.0383284
1876	2518.14	17	0.0383714
1878	2518.19	17	0.038338
1880	2518.24	17	0.0383481
1882	2518.29	17	0.0383042
1884	2518.34	17	0.0383639
1886	2518.39	17	0.0383047
1888	2518.44	17	0.0383881
1890	2518.49	17	0.0384289
1892	2518.54	17	0.0383674
1894	2518.59	17	0.0383617
1896	2518.64	17	0.0383178
1898	2518.69	17	0.0383411
1900	2518.74	17	0.0382551
1902	2518.79	17	0.03827
1904	2518.84	17	0.0382915
1906	2518.89	17	0.038191
1908	2518.94	17	0.0381251
1910	2518.99	17	0.0380988
1912	2519.04	17	0.0381268
1914	2519.09	17	0.0381233
1916	2519.14	17	0.0381036
1918	2519.19	17	0.0381743
1920	2519.24	17	0.0381058
1922	2519.29	17	0.038165
1924	2519.34	17	0.038129
1926	2519.39	17	0.0381598
1928	2519.44	17	0.0382397
1930	2519.49	17	0.0381809
1932	2519.54	17	0.0382256
1934	2519.59	17	0.0382669
1936	2519.64	17	0.038284
1938	2519.69	17	0.0382691
1940	2519.74	17	0.0383161
1942	2519.79	17	0.038162
1944	2519.84	17	0.0382287
1946	2519.89	17	0.0381633
1948	2519.94	17	0.0382085
1950	2519.99	17	0.0381036
1952	2520.04	17	0.0381747
1954	2520.09	17	0.038158
1956	2520.14	17	0.0382173
1958	2520.19	17	0.0381883
1960	2520.24	17	0.0382133
1962	2520.29	17	0.0382085
1964	2520.34	17	0.0382704
1966	2520.39	17	0.0382651
1968	2520.44	17	0.0382015
1970	2520.49	17	0.0382744
1972	2520.54	17	0.0383134
1974	2520.59	17	0.038313
1976	2520.64	17	0.0383025
1978	2520.69	17	0.038335
1980	2520.74	17	0.0383033
1982	2520.79	17	0.0383525
1984	2520.84	17	0.0382779
1986	2520.89	17	0.0382208
1988	2520.94	17	0.0382371
1990	2520.99	17	0.0382551
1992	2521.04	17	0.0381993
1994	2521.09	17	0.0382625
1996	2521.14	17	0.0382586
1998	2521.19	17	0.0383424
2000	2521.24	17	0.0382801
2002	2521.29	17	0.0382195
2004	2521.34	17	0.0382147
2006	2521.39	17	0.0382555
2008	2521.44	17	0.0382814
2010	2521.49	17	0.0381716
2012	2521.54	17	0.0381418
2014	2521.59	17	0.0381383
2016	2521.64	17	0.0381128
2018	2521.69	17	0.0380851
2020	2521.74	17	0.0381369
2022	2521.79	17	0.0381141
2024	2521.84	17	0.0381923
2026	2521.89	17	0.0381835
2028	2521.94	17	0.038259
2030	2521.99	17	0.0382182
2032	2522.04	17	0.0382283
2034	2522.09	17	0.0382406
2036	2522.14	17	0.0381989
2038	2522.19	17	0.0382401
2040	2522.24	17	0.038241
2042	2522.29	17	0.0382722
2044	2522.34	17	0.0382212
2046	2522.39	17	0.0382261
2048	2522.44	17	0.0382107
2050	2522.49	17	0.0382485
2052	2522.54	17	0.0381852
2054	2522.59	17	0.0381361
2056	2522.64	17	0.0381514
2058	2522.69	17	0.0381615
2060	2522.74	17	0.0382041
2062	2522.79	17	0.0381773
2064	2522.84	17	0.0381686
2066	2522.89	17	0.0380944
2068	2522.94	17	0.0382546
2070	2522.99	17	0.0381729
2072	2523.04	17	0.0381282
2074	2523.09	17	0.0381967
2076	2523.14	17	0.0382133
2078	2523.19	17	0.0382151
2080	2523.24	17	0.0382138
2082	2523.29	17	0.0382322
2084	2523.34	17	0.0382173
2086	2523.39	17	0.0382559
2088	2523.44	17	0.0381795
2090	2523.49	17	0.0382748
2092	2523.54	17	0.0382757
2094	2523.59	17	0.0381655
2096	2523.64	17	0.0381668
2098	2523.69	17	0.0381716
2100	2523.74	17	0.0380961
2102	2523.79	17	0.0380786
2104	2523.84	17	0.0380202
2106	2523.89	17	0.0379982
2108	2523.94	17	0.0379868
2110	2523.99	17	0.0380215
2112	2524.04	17	0.0381352
2114	2524.09	17	0.0381185
2116	2524.14	17	0.038169
2118	2524.19	17	0.0381611
2120	2524.24	17	0.038194
2122	2524.29	17	0.0380645
2124	2524.34	17	0.0381141
2126	2524.39	17	0.0381181
2128	2524.44	17	0.038144
2130	2524.49	17	0.0380851
2132	2524.54	17	0.0380952
2134	2524.59	17	0.0380584
2136	2524.64	17	0.038151
2138	2524.69	17	0.0381501
2140	2524.74	17	0.0381576
2142	2524.79	17	0.0381001
2144	2524.84	17	0.0382032
2146	2524.89	17	0.038198
2148	2524.94	17	0.0381567
2150	2524.99	17	0.0380649
2152	2525.04	17	0.0380649
2154	2525.09	17	0.0379912
2156	2525.14	17	0.0379758
2158	2525.19	17	0.0380162
2160	2525.24	17	0.0380171
2162	2525.29	17	0.0380737
2164	2525.34	17	0.0380289
2166	2525.39	17	0.0380417
2168	2525.44	17	0.0381018
2170	2525.49	17	0.0382059
2172	2525.54	17	0.0381523
2174	2525.59	17	0.0381268
2176	2525.64	17	0.0381233
2178	2525.69	17	0.0381365
2180	2525.74	17	0.0380351
2182	2525.79	17	0.038104
2184	2525.84	17	0.0381084
2186	2525.89	17	0.0381725
2188	2525.94	17	0.038176
2190	2525.99	17	0.0381168
2192	2526.04	17	0.0381268
2194	2526.09	17	0.0381093
2196	2526.14	17	0.0380746
2198	2526.19	17	0.0379732
2200	2526.24	17	0.0379552
2202	2526.29	17	0.037967
2204	2526.34	17	0.0379451
2206	2526.39	17	0.0379859
2208	2526.44	17	0.037949
2210	2526.49	17	0.0380237
2212	2526.54	17	0.0379328
2214	2526.59	17	0.0379969
2216	2526.64	17	0.0379144
2218	2526.69	17	0.037989
2220	2526.74	17	0.0380527
2222	2526.79	17	0.0380957
2224	2526.84	17	0.0380333
2226	2526.89	17	0.0380364
2228	2526.94	17	0.0379201
2230	2526.99	17	0.0381137
2232	2527.04	17	0.0380303
2234	2527.09	17	0.0379912
2236	2527.14	17	0.0379951
2238	2527.19	17	0.037935
2240	2527.24	17	0.0379337
2242	2527.29	17	0.0379144
2244	2527.34	17	0.0378419
2246	2527.39	17	0.0378691
2248	2527.44	17	0.0379446
2250	2527.49	17	0.037874
2252	2527.54	17	0.0380294
2254	2527.59	17	0.0379464
2256	2527.64	17	0.0380153
2258	2527.69	17	0.0379978
2260	2527.74	17	0.0380039
2262	2527.79	17	0.0380553
2264	2527.84	17	0.0379885
2266	2527.89	17	0.0379912
2268	2527.94	17	0.0380105
2270	2527.99	17	0.037953
2272	2528.04	17	0.0380131
2274	2528.09	17	0.0379736
2276	2528.14	17	0.0378867
2278	2528.19	17	0.0379429
2280	2528.24	17	0.0379723
2282	2528.29	17	0.0379473
2284	2528.34	17	0.038003
2286	2528.39	17	0.0379113
2288	2528.44	17	0.0378832
2290	2528.49	17	0.0378836
2292	2528.54	17	0.0379486
2294	2528.59	17	0.0379315
2296	2528.64	17	0.0378757
2298	2528.69	17	0.0379556
2300	2528.74	17	0.0379315
2302	2528.79	17	0.037989
2304	2528.84	17	0.0379433
2306	2528.89	17	0.0379521
2308	2528.94	17	0.0379244
2310	2528.99	17	0.037881
2312	2529.04	17	0.0378726
2314	2529.09	17	0.0378524
2316	2529.14	17	0.0377853
2318	2529.19	17	0.0377624
2320	2529.24	17	0.0377848
2322	2529.29	17	0.0377172
2324	2529.34	17	0.0377194
2326	2529.39	17	0.0377462
2328	2529.44	17	0.0376865
2330	2529.49	17	0.0377493
2332	2529.54	17	0.0377185
2334	2529.59	17	0.0376531
2336	2529.64	17	0.0377383
2338	2529.69	17	0.0376676
2340	2529.74	17	0.0376918
2342	2529.79	17	0.0376351
2344	2529.84	17	0.037701
2346	2529.89	17	0.0376263
2348	2529.94	17	0.0376777
2350	2529.99	17	0.0376404
2352	2530.04	17	0.0376053
2354	2530.09	17	0.0376382
2356	2530.14	17	0.0376079
2358	2530.19	17	0.0376259
2360	2530.24	17	0.0376496
2362	2530.29	17	0.037611
2364	2530.34	17	0.037686
2366	2530.39	17	0.0376812
2368	2530.44	17	0.037715
2370	2530.49	17	0.0377264
2372	2530.54	17	0.0377681
2374	2530.59	17	0.0377677
2376	2530.64	17	0.0377962
2378	2530.69	17	0.0377572
2380	2530.74	17	0.0377664
2382	2530.79	17	0.0377106
2384	2530.84	17	0.0377291
2386	2530.89	17	0.0377387
2388	2530.94	17	0.0377225
2390	2530.99	17	0.03769
2392	2531.04	17	0.0376597
2394	2531.09	17	0.0376676
2396	2531.14	17	0.0376531
2398	2531.19	17	0.0375873
2400	2531.24	17	0.037679
2402	2531.29	17	0.0376228
2404	2531.34	17	0.0376834
2406	2531.39	17	0.0376465
2408	2531.44	17	0.0377308
2410	2531.49	17	0.0376386
2412	2531.54	17	0.0376637
2414	2531.59	17	0.0375859
2416	2531.64	17	0.0376733
2418	2531.69	17	0.0375574
2420	2531.74	17	0.0375148
2422	2531.79	17	0.0375394
2424	2531.84	17	0.0374929
2426	2531.89	17	0.0375078
2428	2531.94	17	0.0375117
2430	2531.99	17	0.0376171
2432	2532.04	17	0.0376277
2434	2532.09	17	0.0377379
2436	2532.14	17	0.0376843
2438	2532.19	17	0.0376759
2440	2532.24	17	0.0376228
2442	2532.29	17	0.0376246
2444	2532.34	17	0.0376786
2446	2532.39	17	0.0376896
2448	2532.44	17	0.0377172
2450	2532.49	17	0.0376478
2452	2532.54	17	0.0377014
2454	2532.59	17	0.0376215
2456	2532.64	17	0.0375302
2458	2532.69	17	0.0375662
2460	2532.74	17	0.0376136
2462	2532.79	17	0.0376202
2464	2532.84	17	0.0376013
2466	2532.89	17	0.0376053
2468	2532.94	17	0.0376004
2470	2532.99	17	0.0376132
2472	2533.04	17	0.0375324
2474	2533.09	17	0.0375258
2476	2533.14	17	0.0374964
2478	2533.19	17	0.0374863
2480	2533.24	17	0.0373932
2482	2533.29	17	0.0373462
2484	2533.34	17	0.0373669
2486	2533.39	17	0.037258
2488	2533.44	17	0.0372395
2490	2533.49	17	0.0372949
2492	2533.54	17	0.0372922
2494	2533.59	17	0.0373366
2496	2533.64	17	0.0374784
2498	2533.69	17	0.0375012
2500	2533.74	17	0.0374621
2502	2533.79	17	0.0374678
2504	2533.84	17	0.0374643
2506	2533.89	17	0.0374485
2508	2533.94	17	0.037413
2510	2533.99	17	0.0374384
2512	2534.04	17	0.0374266
2514	2534.09	17	0.0373453
2516	2534.14	17	0.0372935
2518	2534.19	17	0.0373133
2520	2534.24	17	0.0373405
2522	2534.29	17	0.0373458
2524	2534.34	17	0.0374064
2526	2534.39	17	0.0374007
2528	2534.44	17	0.037431
2530	2534.49	17	0.0374108
2532	2534.54	17	0.0373379
2534	2534.59	17	0.0373945
2536	2534.64	17	0.0374402
2538	2534.69	17	0.0373612
2540	2534.74	17	0.0373638
2542	2534.79	17	0.0373831
2544	2534.84	17	0.0373831
2546	2534.89	17	0.0374125
2548	2534.94	17	0.0374064
2550	2534.99	17	0.0374617
2552	2535.04	17	0.037384
2554	2535.09	17	0.0373625
2556	2535.14	17	0.0373972
2558	2535.19	17	0.0374059
2560	2535.24	17	0.0374463
2562	2535.29	17	0.0374608
2564	2535.34	17	0.0374621
2566	2535.39	17	0.0374823
2568	2535.44	17	0.0374314
2570	2535.49	17	0.0374367
2572	2535.54	17	0.037416
2574	2535.59	17	0.037395
2576	2535.64	17	0.0374015
2578	2535.69	17	0.0374231
2580	2535.74	17	0.037362
2582	2535.79	17	0.0373976
2584	2535.84	17	0.0373844
2586	2535.89	17	0.0373585
2588	2535.94	17	0.0373423
2590	2535.99	17	0.0372426
2592	2536.04	17	0.0373076
2594	2536.09	17	0.0373432
2596	2536.14	17	0.0373919
2598	2536.19	17	0.0374191
2600	2536.24	17	0.0374542
2602	2536.29	17	0.0374046
2604	2536.34	17	0.0374577
2606	2536.39	17	0.0374081
2608	2536.44	17	0.037416
2610	2536.49	17	0.0374086
2612	2536.54	17	0.0374419
2614	2536.59	17	0.037384
2616	2536.64	17	0.0373225
2618	2536.69	17	0.0373098
2620	2536.74	17	0.0372308
2622	2536.79	17	0.0372874
2624	2536.84	17	0.0372141
2626	2536.89	17	0.0371956
2628	2536.94	17	0.0371298
2630	2536.99	17	0.0370881
2632	2537.04	17	0.0371614
2634	2537.09	17	0.0372619
2636	2537.14	17	0.0372927
2638	2537.19	17	0.0372725
2640	2537.24	17	0.0372698
2642	2537.29	17	0.037326
2644	2537.34	17	0.0373603
2646	2537.39	17	0.0372751
2648	2537.44	17	0.0373383
2650	2537.49	17	0.0372457
2652	2537.54	17	0.0372474
2654	2537.59	17	0.037287
2656	2537.64	17	0.037377
2658	2537.69	17	0.0373528
2660	2537.74	17	0.0372821
2662	2537.79	17	0.037265
2664	2537.84	17	0.0372615
2666	2537.89	17	0.0372474
2668	2537.94	17	0.0372128
2670	2537.99	17	0.0372536
2672	2538.04	17	0.0372681
2674	2538.09	17	0.0372246
2676	2538.14	17	0.037258
2678	2538.19	17	0.0371645
2680	2538.24	17	0.0372031
2682	2538.29	17	0.0372207
2684	2538.34	17	0.0371693
2686	2538.39	17	0.0371956
2688	2538.44	17	0.037207
2690	2538.49	17	0.0372141
2692	2538.54	17	0.0371794
2694	2538.59	17	0.037218
2696	2538.64	17	0.0372505
2698	2538.69	17	0.0372549
2700	2538.74	17	0.0372457
2702	2538.79	17	0.0372874
2704	2538.84	17	0.0372299
2706	2538.89	17	0.0372066
2708	2538.94	17	0.0372536
2710	2538.99	17	0.0372136
2712	2539.04	17	0.0372387
2714	2539.09	17	0.0372606
2716	2539.14	17	0.0371728
2718	2539.19	17	0.0372518
2720	2539.24	17	0.0371948
2722	2539.29	17	0.0372316
2724	2539.34	17	0.0372088
2726	2539.39	17	0.0371684
2728	2539.44	17	0.0372518
2730	2539.49	17	0.0372211
2732	2539.54	17	0.0371908
2734	2539.59	17	0.0371895
2736	2539.64	17	0.0372378
2738	2539.69	17	0.0372571
2740	2539.74	17	0.0373129
2742	2539.79	17	0.0372321
2744	2539.84	17	0.0372672
2746	2539.89	17	0.0372092
2748	2539.94	17	0.0372479
2750	2539.99	17	0.0372602
2752	2540.04	17	0.0372308
2754	2540.09	17	0.0372101
2756	2540.14	17	0.0371289
2758	2540.19	17	0.0371337
2760	2540.24	17	0.0371377
2762	2540.29	17	0.0370108
2764	2540.34	17	0.0369866
2766	2540.39	17	0.0369203
2768	2540.44	17	0.0368378
2770	2540.49	17	0.0367373
2772	2540.54	17	0.0367074
2774	2540.59	17	0.0367412
2776	2540.64	17	0.0368044
2778	2540.69	17	0.0368962
2780	2540.74	17	0.0369871
2782	2540.79	17	0.0369678
2784	2540.84	17	0.0370771
2786	2540.89	17	0.037024
2788	2540.94	17	0.0370872
2790	2540.99	17	0.0371443
2792	2541.04	17	0.0371719
2794	2541.09	17	0.0372387
2796	2541.14	17	0.0372027
2798	2541.19	17	0.0372378
2800	2541.24	17	0.0372325
2802	2541.29	17	0.0372347
2804	2541.34	17	0.0371991
2806	2541.39	17	0.0371943
2808	2541.44	17	0.0371965
2810	2541.49	17	0.0371825
2812	2541.54	17	0.0371789
2814	2541.59	17	0.0371609
2816	2541.64	17	0.037175
2818	2541.69	17	0.0370692
2820	2541.74	17	0.0371605
2822	2541.79	17	0.0371219
2824	2541.84	17	0.037114
2826	2541.89	17	0.0371746
2828	2541.94	17	0.0371416
2830	2541.99	17	0.0371078
2832	2542.04	17	0.0371026
2834	2542.09	17	0.0370446
2836	2542.14	17	0.0370714
2838	2542.19	17	0.0370696
2840	2542.24	17	0.0371026
2842	2542.29	17	0.0371241
2844	2542.34	17	0.0371135
2846	2542.39	17	0.0370753
2848	2542.44	17	0.0370661
2850	2542.49	17	0.0370788
2852	2542.54	17	0.0371034
2854	2542.59	17	0.037063
2856	2542.64	17	0.0371227
2858	2542.69	17	0.0370314
2860	2542.74	17	0.0370244
2862	2542.79	17	0.0370872
2864	2542.84	17	0.0369761
2866	2542.89	17	0.0369256
2868	2542.94	17	0.0369344
2870	2542.99	17	0.0368764
2872	2543.04	17	0.036948
2874	2543.09	17	0.0370327
2876	2543.14	17	0.0369594
2878	2543.19	17	0.0369853
2880	2543.24	17	0.0369787
2882	2543.29	17	0.0369533
2884	2543.34	17	0.0369827
2886	2543.39	17	0.0370073
2888	2543.44	17	0.037006
2890	2543.49	17	0.037027
2892	2543.54	17	0.0370604
2894	2543.59	17	0.0370485
2896	2543.64	17	0.0371039
2898	2543.69	17	0.036966
2900	2543.74	17	0.037038
2902	2543.79	17	0.0370139
2904	2543.84	17	0.0370301
2906	2543.89	17	0.0369765
2908	2543.94	17	0.0370543
2910	2543.99	17	0.0370213
2912	2544.04	17	0.0369739
2914	2544.09	17	0.03697
2916	2544.14	17	0.0369054
2918	2544.19	17	0.0368971
2920	2544.24	17	0.0368756
2922	2544.29	17	0.0369019
2924	2544.34	17	0.0369537
2926	2544.39	17	0.0369208
2928	2544.44	17	0.0369085
2930	2544.49	17	0.0369291
2932	2544.54	17	0.0368857
2934	2544.59	17	0.0369682
2936	2544.64	17	0.0369678
2938	2544.69	17	0.0369647
2940	2544.74	17	0.0369318
2942	2544.79	17	0.0369669
2944	2544.84	17	0.0369322
2946	2544.89	17	0.0369581
2948	2544.94	17	0.0369959
2950	2544.99	17	0.0370885
2952	2545.04	17	0.0370828
2954	2545.09	17	0.0370569
2956	2545.14	17	0.0371188
2958	2545.19	17	0.0369849
2960	2545.24	17	0.0369243
2962	2545.29	17	0.0369704
2964	2545.34	17	0.0367895
2966	2545.39	17	0.0367961
2968	2545.44	17	0.0367728
2970	2545.49	17	0.0367439
2972	2545.54	17	0.0366503
2974	2545.59	17	0.0366951
2976	2545.64	17	0.0367294
2978	2545.69	17	0.0368602
2980	2545.74	17	0.0368339
2982	2545.79	17	0.0369357
2984	2545.84	17	0.0369045
2986	2545.89	17	0.036952
2988	2545.94	17	0.0369528
2990	2545.99	17	0.036973
2992	2546.04	17	0.0369691
2994	2546.09	17	0.036937
2996	2546.14	17	0.0369603
2998	2546.19	17	0.0369405
3000	2546.24	17	0.0369511
3002	2546.29	17	0.036948
3004	2546.34	17	0.03693
3006	2546.39	17	0.0369397
3008	2546.44	17	0.0369616
3010	2546.49	17	0.0369423
3012	2546.54	17	0.0368611
3014	2546.59	17	0.0369484
3016	2546.64	17	0.0368642
3018	2546.69	17	0.0368694
3020	2546.74	17	0.0369045
3022	2546.79	17	0.0368523
3024	2546.84	17	0.036858
3026	2546.89	17	0.0368642
3028	2546.94	17	0.036808
3030	2546.99	17	0.0368598
3032	2547.04	17	0.0368742
3034	2547.09	17	0.0368523
3036	2547.14	17	0.0367408
3038	2547.19	17	0.0367017
3040	2547.24	17	0.0366697
3042	2547.29	17	0.0367184
3044	2547.34	17	0.0366872
3046	2547.39	17	0.0365854
3048	2547.44	17	0.0365832
3050	2547.49	17	0.0366653
3052	2547.54	17	0.0367259
3054	2547.59	17	0.0366991
3056	2547.64	17	0.0366776
3058	2547.69	17	0.0366631
3060	2547.74	17	0.0367368
3062	2547.79	17	0.0366604
3064	2547.84	17	0.0366749
3066	2547.89	17	0.0366639
3068	2547.94	17	0.0365854
3070	2547.99	17	0.0365845
3072	2548.04	17	0.0365695
3074	2548.09	17	0.0365274
3076	2548.14	17	0.0366319
3078	2548.19	17	0.0366156
3080	2548.24	17	0.0366416
3082	2548.29	17	0.0366859
3084	2548.34	17	0.0367381
3086	2548.39	17	0.0367636
3088	2548.44	17	0.0367338
3090	2548.49	17	0.0367579
3092	2548.54	17	0.0368365
3094	2548.59	17	0.0367184
3096	2548.64	17	0.0368049
3098	2548.69	17	0.0368049
3100	2548.74	17	0.0367469
3102	2548.79	17	0.0367627
3104	2548.84	17	0.0367509
3106	2548.89	17	0.0367447
3108	2548.94	17	0.0366718
3110	2548.99	17	0.0366538
3112	2549.04	17	0.0366885
3114	2549.09	17	0.0366332
3116	2549.14	17	0.0366525
3118	2549.19	17	0.0367952
3120	2549.24	17	0.0367452
3122	2549.29	17	0.0367847
3124	2549.34	17	0.0367698
3126	2549.39	17	0.0367649
3128	2549.44	17	0.0368444
3130	2549.49	17	0.0367302
3132	2549.54	17	0.0367662
3134	2549.59	17	0.0367706
3136	2549.64	17	0.0367386
3138	2549.69	17	0.0367496
3140	2549.74	17	0.0368347
3142	2549.79	17	0.0368084
3144	2549.84	17	0.0367179
3146	2549.89	17	0.0367219
3148	2549.94	17	0.0366859
3150	2549.99	17	0.0367425
3152	2550.04	17	0.0367856
3154	2550.09	17	0.0367649
3156	2550.14	17	0.036786
3158	2550.19	17	0.0367856
3160	2550.24	17	0.0367737
3162	2550.29	17	0.036786
3164	2550.34	17	0.0368211
3166	2550.39	17	0.0367522
3168	2550.44	17	0.0367856
3170	2550.49	17	0.0368181
3172	2550.54	17	0.0368277
3174	2550.59	17	0.0368251
3176	2550.64	17	0.0368106
3178	2550.69	17	0.0367531
3180	2550.74	17	0.0368295
3182	2550.79	17	0.0367698
3184	2550.84	17	0.0367179
3186	2550.89	17	0.0367144
3188	2550.94	17	0.0367149
3190	2550.99	17	0.0366657
3192	2551.04	17	0.0367245
3194	2551.09	17	0.0366745
3196	2551.14	17	0.0366604
3198	2551.19	17	0.0365695
3200	2551.24	17	0.0365946
3202	2551.29	17	0.0365911
3204	2551.34	17	0.0365033
3206	2551.39	17	0.0365024
3208	2551.44	17	0.0364848
3210	2551.49	17	0.0364826
3212	2551.54	17	0.0364826
3214	2551.59	17	0.0365783
3216	2551.64	17	0.036642
3218	2551.69	17	0.0367377
3220	2551.74	17	0.0367785
3222	2551.79	17	0.0367926
3224	2551.84	17	0.0367381
3226	2551.89	17	0.0367895
3228	2551.94	17	0.0367671
3230	2551.99	17	0.0368093
3232	2552.04	17	0.0367829
3234	2552.09	17	0.0367439
3236	2552.14	17	0.0367654
3238	2552.19	17	0.0367289
3240	2552.24	17	0.0367583
3242	2552.29	17	0.0367755
3244	2552.34	17	0.0367746
3246	2552.39	17	0.0367263
3248	2552.44	17	0.0367597
3250	2552.49	17	0.0367083
3252	2552.54	17	0.0366499
3254	2552.59	17	0.0366455
3256	2552.64	17	0.0365889
3258	2552.69	17	0.0365393
3260	2552.74	17	0.0364409
3262	2552.79	17	0.0364787
3264	2552.84	17	0.0363887
3266	2552.89	17	0.036336
3268	2552.94	17	0.0363988
3270	2552.99	17	0.0364291
3272	2553.04	17	0.0365033
3274	2553.09	17	0.0365783
3276	2553.14	17	0.0366082
3278	2553.19	17	0.0365634
3280	2553.24	17	0.0365511
3282	2553.29	17	0.0366135
3284	2553.34	17	0.0366095
3286	2553.39	17	0.0365599
3288	2553.44	17	0.0365665
3290	2553.49	17	0.0365186
3292	2553.54	17	0.0365546
3294	2553.59	17	0.0365327
3296	2553.64	17	0.036487
3298	2553.69	17	0.0365138
3300	2553.74	17	0.0365006
3302	2553.79	17	0.0364589
3304	2553.84	17	0.0364295
3306	2553.89	17	0.036509
3308	2553.94	17	0.0365186
3310	2553.99	17	0.0365581
3312	2554.04	17	0.0365129
3314	2554.09	17	0.0365577
3316	2554.14	17	0.0366192
3318	2554.19	17	0.0366767
3320	2554.24	17	0.0366209
3322	2554.29	17	0.0365467
3324	2554.34	17	0.0366064
3326	2554.39	17	0.0366148
3328	2554.44	17	0.0365357
3330	2554.49	17	0.0365278
3332	2554.54	17	0.0365586
3334	2554.59	17	0.0365722
3336	2554.64	17	0.0366319
3338	2554.69	17	0.0365599
3340	2554.74	17	0.0365581
3342	2554.79	17	0.0365788
3344	2554.84	17	0.0365423
3346	2554.89	17	0.036541
3348	2554.94	17	0.0365366
3350	2554.99	17	0.0365472
3352	2555.04	17	0.036505
3354	2555.09	17	0.0364251
3356	2555.14	17	0.0365265
3358	2555.19	17	0.036494
3360	2555.24	17	0.0364918
3362	2555.29	17	0.0365559
3364	2555.34	17	0.0364949
3366	2555.39	17	0.0365542
3368	2555.44	17	0.036516
3370	2555.49	17	0.0365546
3372	2555.54	17	0.0365876
3374	2555.59	17	0.0365371
3376	2555.64	17	0.036566
3378	2555.69	17	0.0365151
3380	2555.74	17	0.0365243
3382	2555.79	17	0.0365182
3384	2555.84	17	0.0364422
3386	2555.89	17	0.0365204
3388	2555.94	17	0.0364997
3390	2555.99	17	0.0365318
3392	2556.04	17	0.0364633
3394	2556.09	17	0.0364738
3396	2556.14	17	0.036548
3398	2556.19	17	0.0365498
3400	2556.24	17	0.0365366
3402	2556.29	17	0.0364554
3404	2556.34	17	0.0364813
3406	2556.39	17	0.0364905
3408	2556.44	17	0.0364216
3410	2556.49	17	0.0364519
3412	2556.54	17	0.0364242
3414	2556.59	17	0.036372
3416	2556.64	17	0.0363715
3418	2556.69	17	0.0362916
3420	2556.74	17	0.036296
3422	2556.79	17	0.0363553
3424	2556.84	17	0.0362749
3426	2556.89	17	0.0363246
3428	2556.94	17	0.0363461
3430	2556.99	17	0.0363733
3432	2557.04	17	0.0363957
3434	2557.09	17	0.0363917
3436	2557.14	17	0.0363755
3438	2557.19	17	0.0363421
3440	2557.24	17	0.0364023
3442	2557.29	17	0.0363584
3444	2557.34	17	0.0363158
3446	2557.39	17	0.0363702
3448	2557.44	17	0.0363347
3450	2557.49	17	0.0362447
3452	2557.54	17	0.036285
3454	2557.59	17	0.0363483
3456	2557.64	17	0.0362982
3458	2557.69	17	0.0363215
3460	2557.74	17	0.0362934
3462	2557.79	17	0.0363733
3464	2557.84	17	0.0362934
3466	2557.89	17	0.0363742
3468	2557.94	17	0.0362543
3470	2557.99	17	0.0363382
3472	2558.04	17	0.0362526
3474	2558.09	17	0.0362214
3476	2558.14	17	0.0361977
3478	2558.19	17	0.036181
3480	2558.24	17	0.0362249
3482	2558.29	17	0.0361727
3484	2558.34	17	0.0361634
3486	2558.39	17	0.03621
3488	2558.44	17	0.0361059
3490	2558.49	17	0.0361964
3492	2558.54	17	0.0362065
3494	2558.59	17	0.0361819
3496	2558.64	17	0.0362249
3498	2558.69	17	0.0363426
3500	2558.74	17	0.0362188
3502	2558.79	17	0.0361972
3504	2558.84	17	0.0362152
3506	2558.89	17	0.0361586
3508	2558.94	17	0.0362372
3510	2558.99	17	0.0361665
3512	2559.04	17	0.0361208
3514	2559.09	17	0.0360914
3516	2559.14	17	0.0361551
3518	2559.19	17	0.0361955
3520	2559.24	17	0.0362824
3522	2559.29	17	0.0363254
3524	2559.34	17	0.0363259
3526	2559.39	17	0.0363557
3528	2559.44	17	0.0363571
3530	2559.49	17	0.036332
3532	2559.54	17	0.0362728
3534	2559.59	17	0.0362785
3536	2559.64	17	0.0362468
3538	2559.69	17	0.0362864
3540	2559.74	17	0.0362868
3542	2559.79	17	0.0362609
3544	2559.84	17	0.0362468
3546	2559.89	17	0.036282
3548	2559.94	17	0.0362811
3550	2559.99	17	0.0362697
3552	2560.04	17	0.0362886
3554	2560.09	17	0.036282
3556	2560.14	17	0.0362956
3558	2560.19	17	0.0362583
3560	2560.24	17	0.0363224
3562	2560.29	17	0.0362148
3564	2560.34	17	0.036253
3566	2560.39	17	0.0362209
3568	2560.44	17	0.036303
3570	2560.49	17	0.036253
3572	2560.54	17	0.0363707
3574	2560.59	17	0.0362569
3576	2560.64	17	0.0362771
3578	2560.69	17	0.036282
3580	2560.74	17	0.0362719
3582	2560.79	17	0.0363579
3584	2560.84	17	0.0363022
3586	2560.89	17	0.036354
3588	2560.94	17	0.0363004
3590	2560.99	17	0.0363145
3592	2561.04	17	0.0363175
3594	2561.09	17	0.0362776
3596	2561.14	17	0.0362495
3598	2561.19	17	0.0362429
3600	2561.24	17	0.0362649
3602	2561.29	17	0.0362425
3604	2561.34	17	0.0362416
3606	2561.39	17	0.0362065
3608	2561.44	17	0.0362188
3610	2561.49	17	0.0362521
3612	2561.54	17	0.0362425
3614	2561.59	17	0.0362763
3616	2561.64	17	0.0362166
3618	2561.69	17	0.0362209
3620	2561.74	17	0.0362368
3622	2561.79	17	0.0362337
3624	2561.84	17	0.0362824
3626	2561.89	17	0.0362846
3628	2561.94	17	0.036307
3630	2561.99	17	0.0362943
3632	2562.04	17	0.0362521
3634	2562.09	17	0.0362161
3636	2562.14	17	0.0362956
3638	2562.19	17	0.0362359
3640	2562.24	17	0.0363219
3642	2562.29	17	0.0362473
3644	2562.34	17	0.0362231
3646	2562.39	17	0.0362442
3648	2562.44	17	0.0362315
3650	2562.49	17	0.0361942
3652	2562.54	17	0.0361542
3654	2562.59	17	0.0362666
3656	2562.64	17	0.0361797
3658	2562.69	17	0.0362679
3660	2562.74	17	0.0361661
3662	2562.79	17	0.0362468
3664	2562.84	17	0.0362029
3666	2562.89	17	0.0362091
3668	2562.94	17	0.0362447
3670	2562.99	17	0.0362666
3672	2563.04	17	0.0362087
3674	2563.09	17	0.0362451
3676	2563.14	17	0.0362245
3678	2563.19	17	0.0361841
3680	2563.24	17	0.0362073
3682	2563.29	17	0.0361915
3684	2563.34	17	0.0362504
3686	2563.39	17	0.0361964
3688	2563.44	17	0.0362231
3690	2563.49	17	0.0361705
3692	2563.54	17	0.0361687
3694	2563.59	17	0.0362245
3696	2563.64	17	0.0362315
3698	2563.69	17	0.0363162
3700	2563.74	17	0.0362552
3702	2563.79	17	0.0362754
3704	2563.84	17	0.0361858
3706	2563.89	17	0.0362078
3708	2563.94	17	0.0362192
3710	2563.99	17	0.0361836
3712	2564.04	17	0.0361643
3714	2564.09	17	0.0361933
3716	2564.14	17	0.0361489
3718	2564.19	17	0.0361511
3720	2564.24	17	0.036192
3722	2564.29	17	0.0361485
3724	2564.34	17	0.0361318
3726	2564.39	17	0.0361661
3728	2564.44	17	0.0361028
3730	2564.49	17	0.0361621
3732	2564.54	17	0.0361665
3734	2564.59	17	0.0361129
3736	2564.64	17	0.0361371
3738	2564.69	17	0.0361143
3740	2564.74	17	0.0361296
3742	2564.79	17	0.0361371
3744	2564.84	17	0.0361072
3746	2564.89	17	0.0361612
3748	2564.94	17	0.0361854
3750	2564.99	17	0.0361933
3752	2565.04	17	0.0361586
3754	2565.09	17	0.0361538
3756	2565.14	17	0.0361244
3758	2565.19	17	0.0361968
3760	2565.24	17	0.0361889
3762	2565.29	17	0.0361195
3764	2565.34	17	0.0361336
3766	2565.39	17	0.036145
3768	2565.44	17	0.0361331
3770	2565.49	17	0.0361094
3772	2565.54	17	0.0361191
3774	2565.59	17	0.0361419
3776	2565.64	17	0.0362122
3778	2565.69	17	0.036145
3780	2565.74	17	0.0361797
3782	2565.79	17	0.0362073
3784	2565.84	17	0.0361586
3786	2565.89	17	0.0360967
3788	2565.94	17	0.0361687
3790	2565.99	17	0.0361652
3792	2566.04	17	0.0361621
3794	2566.09	17	0.036145
3796	2566.14	17	0.0361296
3798	2566.19	17	0.0361467
3800	2566.24	17	0.0361366
3802	2566.29	17	0.0361327
3804	2566.34	17	0.0361705
3806	2566.39	17	0.0361626
3808	2566.44	17	0.0360831
3810	2566.49	17	0.0361402
3812	2566.54	17	0.036181
3814	2566.59	17	0.0361827
3816	2566.64	17	0.0362029
3818	2566.69	17	0.0361709
3820	2566.74	17	0.0361784
3822	2566.79	17	0.0361463
3824	2566.84	17	0.0361753
3826	2566.89	17	0.0361424
3828	2566.94	17	0.0361463
3830	2566.99	17	0.0361186
3832	2567.04	17	0.0361608
3834	2567.09	17	0.0361577
3836	2567.14	17	0.0361375
3838	2567.19	17	0.0361173
3840	2567.24	17	0.0361059
3842	2567.29	17	0.0360506
3844	2567.34	17	0.0360598
3846	2567.39	17	0.0361086
3848	2567.44	17	0.0361064
3850	2567.49	17	0.0361116
3852	2567.54	17	0.036105
3854	2567.59	17	0.0361507
3856	2567.64	17	0.0361485
3858	2567.69	17	0.0360989
3860	2567.74	17	0.0361507
3862	2567.79	17	0.0361191
3864	2567.84	17	0.0360295
3866	2567.89	17	0.036087
3868	2567.94	17	0.0361086
3870	2567.99	17	0.0360436
3872	2568.04	17	0.0360844
3874	2568.09	17	0.0361195
3876	2568.14	17	0.0361138
3878	2568.19	17	0.0361323
3880	2568.24	17	0.036073
3882	2568.29	17	0.0360633
3884	2568.34	17	0.0360348
3886	2568.39	17	0.0361204
3888	2568.44	17	0.0360725
3890	2568.49	17	0.036055
3892	2568.54	17	0.0361652
3894	2568.59	17	0.0361129
3896	2568.64	17	0.0361511
3898	2568.69	17	0.0361647
3900	2568.74	17	0.0361103
3902	2568.79	17	0.0360725
3904	2568.84	17	0.0359997
3906	2568.89	17	0.0360563
3908	2568.94	17	0.0360159
3910	2568.99	17	0.0361151
3912	2569.04	17	0.0360791
3914	2569.09	17	0.0360796
3916	2569.14	17	0.0361156
3918	2569.19	17	0.0361028
3920	2569.24	17	0.0361125
3922	2569.29	17	0.0360668
3924	2569.34	17	0.0360014
3926	2569.39	17	0.0360326
3928	2569.44	17	0.0360396
3930	2569.49	17	0.0360115
3932	2569.54	17	0.0360506
3934	2569.59	17	0.0360686
3936	2569.64	17	0.0360401
3938	2569.69	17	0.0360251
3940	2569.74	17	0.0360822
3942	2569.79	17	0.0361318
3944	2569.84	17	0.0360822
3946	2569.89	17	0.0361252
3948	2569.94	17	0.0360998
3950	2569.99	17	0.0361213
3952	2570.04	17	0.0360884
3954	2570.09	17	0.0360515
3956	2570.14	17	0.036051
3958	2570.19	17	0.0360453
3960	2570.24	17	0.0359926
3962	2570.29	17	0.0360111
3964	2570.34	17	0.0359983
3966	2570.39	17	0.0359584
3968	2570.44	17	0.0360229
3970	2570.49	17	0.0359825
3972	2570.54	17	0.0359228
3974	2570.59	17	0.0358978
3976	2570.64	17	0.0359259
3978	2570.69	17	0.0358996
3980	2570.74	17	0.0359044
3982	2570.79	17	0.0359321
3984	2570.84	17	0.0358662
3986	2570.89	17	0.0359518
3988	2570.94	17	0.0359013
3990	2570.99	17	0.0359457
3992	2571.04	17	0.035994
3994	2571.09	17	0.0359777
3996	2571.14	17	0.0359092
3998	2571.19	17	0.0359075
[truncated: 32,957 more rows]

## Sheet: Mouse 1_470
FrameCounter	Timestamp	Flags	Region0G
1	2471.27	18	0.0292726
3	2471.32	18	0.0292203
5	2471.37	18	0.0291633
7	2471.42	18	0.0290329
9	2471.47	18	0.0290693
11	2471.52	18	0.0289784
13	2471.57	18	0.0289319
15	2471.62	18	0.0288963
17	2471.67	18	0.028881
19	2471.72	18	0.0288191
21	2471.77	18	0.0288524
23	2471.82	18	0.0287751
25	2471.87	18	0.028697
27	2471.92	18	0.0287207
29	2471.97	18	0.028722
31	2472.02	18	0.0286794
33	2472.07	18	0.0286667
35	2472.12	18	0.028661
37	2472.17	18	0.0286531
39	2472.22	18	0.02865
41	2472.27	18	0.028618
43	2472.32	18	0.0286724
45	2472.37	18	0.0286728
47	2472.42	18	0.02865
49	2472.47	18	0.0286193
51	2472.52	18	0.028549
53	2472.57	18	0.0285407
55	2472.62	18	0.0285165
57	2472.67	18	0.028549
59	2472.72	18	0.0285565
61	2472.77	18	0.0284968
63	2472.82	18	0.0284959
65	2472.87	18	0.0284801
67	2472.92	18	0.0284169
69	2472.97	18	0.0284323
71	2473.02	18	0.0284213
73	2473.07	18	0.0283703
75	2473.12	18	0.0283967
77	2473.17	18	0.0284301
79	2473.22	18	0.0284371
81	2473.27	18	0.028427
83	2473.32	18	0.0284415
85	2473.37	18	0.0284441
87	2473.42	18	0.02838
89	2473.47	18	0.0283862
91	2473.52	18	0.0283163
93	2473.57	18	0.0283396
95	2473.62	18	0.0283466
97	2473.67	18	0.0283396
99	2473.72	18	0.0282931
101	2473.77	18	0.0282637
103	2473.82	18	0.0283111
105	2473.87	18	0.0283001
107	2473.92	18	0.0283291
109	2473.97	18	0.028283
111	2474.02	18	0.0282891
113	2474.07	18	0.0282448
115	2474.12	18	0.0282378
117	2474.17	18	0.028272
119	2474.22	18	0.028243
121	2474.27	18	0.0282039
123	2474.32	18	0.0282553
125	2474.37	18	0.0282487
127	2474.42	18	0.0281811
129	2474.47	18	0.028178
131	2474.52	18	0.028225
133	2474.57	18	0.0281824
135	2474.62	18	0.0282215
137	2474.67	18	0.0281552
139	2474.72	18	0.0281491
141	2474.77	18	0.0282808
143	2474.82	18	0.028283
145	2474.87	18	0.0282448
147	2474.92	18	0.0282277
149	2474.97	18	0.028247
151	2475.02	18	0.0283194
153	2475.07	18	0.0282874
155	2475.12	18	0.0283098
157	2475.17	18	0.0283062
159	2475.22	18	0.0282935
161	2475.27	18	0.0282325
163	2475.32	18	0.0282641
165	2475.37	18	0.0282729
167	2475.42	18	0.0283247
169	2475.47	18	0.0283308
171	2475.52	18	0.0282641
173	2475.57	18	0.0282759
175	2475.62	18	0.028265
177	2475.67	18	0.0282729
179	2475.72	18	0.028265
181	2475.77	18	0.028268
183	2475.82	18	0.0282329
185	2475.87	18	0.0282997
187	2475.92	18	0.0282948
189	2475.97	18	0.0282386
191	2476.02	18	0.0283019
193	2476.07	18	0.028243
195	2476.12	18	0.0282931
197	2476.17	18	0.0282628
199	2476.22	18	0.0282768
201	2476.27	18	0.028294
203	2476.32	18	0.0282659
205	2476.37	18	0.0282391
207	2476.42	18	0.028261
209	2476.47	18	0.0282702
211	2476.52	18	0.028286
213	2476.57	18	0.0282698
215	2476.62	18	0.0282755
217	2476.67	18	0.0282755
219	2476.72	18	0.0282514
221	2476.77	18	0.0282584
223	2476.82	18	0.0282413
225	2476.87	18	0.0282004
227	2476.92	18	0.0281837
229	2476.97	18	0.0282795
231	2477.02	18	0.0281684
233	2477.07	18	0.0281557
235	2477.12	18	0.0281732
237	2477.17	18	0.0281319
239	2477.22	18	0.0280762
241	2477.27	18	0.0280854
243	2477.32	18	0.0281043
245	2477.37	18	0.0280643
247	2477.42	18	0.0280455
249	2477.47	18	0.0280775
251	2477.52	18	0.0281078
253	2477.57	18	0.0281372
255	2477.62	18	0.0281223
257	2477.67	18	0.0280815
259	2477.72	18	0.0281096
261	2477.77	18	0.0280367
263	2477.82	18	0.0280595
265	2477.87	18	0.0280889
267	2477.92	18	0.0280288
269	2477.97	18	0.028027
271	2478.02	18	0.0280463
273	2478.07	18	0.0280665
275	2478.12	18	0.0279818
277	2478.17	18	0.0279914
279	2478.22	18	0.0280336
281	2478.27	18	0.0280397
283	2478.32	18	0.0280428
285	2478.37	18	0.0279954
287	2478.42	18	0.0280459
289	2478.47	18	0.0280024
291	2478.52	18	0.028074
293	2478.57	18	0.0281688
295	2478.62	18	0.0280951
297	2478.67	18	0.0281539
299	2478.72	18	0.028092
301	2478.77	18	0.0281227
303	2478.82	18	0.0281056
305	2478.87	18	0.0281148
307	2478.92	18	0.0280705
309	2478.97	18	0.0280946
311	2479.02	18	0.0280648
313	2479.07	18	0.0280283
315	2479.12	18	0.0280845
317	2479.17	18	0.0280529
319	2479.22	18	0.0280727
321	2479.27	18	0.0280507
323	2479.32	18	0.0280419
325	2479.37	18	0.0281038
327	2479.42	18	0.0279862
329	2479.47	18	0.0280481
331	2479.52	18	0.0280099
333	2479.57	18	0.0280441
335	2479.62	18	0.0280428
337	2479.67	18	0.0279809
339	2479.72	18	0.0279888
341	2479.77	18	0.0279475
343	2479.82	18	0.0279366
345	2479.87	18	0.0279388
347	2479.92	18	0.0279063
349	2479.97	18	0.0279142
351	2480.02	18	0.0278171
353	2480.07	18	0.0278066
355	2480.12	18	0.0277732
357	2480.17	18	0.0277706
359	2480.22	18	0.0277996
361	2480.27	18	0.0278303
363	2480.32	18	0.0278128
365	2480.37	18	0.0278343
367	2480.42	18	0.02789
369	2480.47	18	0.027908
371	2480.52	18	0.0279265
373	2480.57	18	0.0279379
375	2480.62	18	0.0279914
377	2480.67	18	0.0279919
379	2480.72	18	0.0279093
381	2480.77	18	0.0279388
383	2480.82	18	0.0278935
385	2480.87	18	0.0278531
387	2480.92	18	0.0278619
389	2480.97	18	0.0278575
391	2481.02	18	0.0278584
393	2481.07	18	0.0278694
395	2481.12	18	0.0278233
397	2481.17	18	0.0278044
399	2481.22	18	0.0278501
401	2481.27	18	0.0278448
403	2481.32	18	0.0278628
405	2481.37	18	0.027872
407	2481.42	18	0.0278527
409	2481.47	18	0.027894
411	2481.52	18	0.0278422
413	2481.57	18	0.0278887
415	2481.62	18	0.027894
417	2481.67	18	0.0279089
419	2481.72	18	0.0279072
421	2481.77	18	0.0278905
423	2481.82	18	0.0278988
425	2481.87	18	0.0279252
427	2481.92	18	0.0278922
429	2481.97	18	0.0279339
431	2482.02	18	0.027941
433	2482.07	18	0.0279546
435	2482.12	18	0.027959
437	2482.17	18	0.0279647
439	2482.22	18	0.0279682
441	2482.27	18	0.0279506
443	2482.32	18	0.0279603
445	2482.37	18	0.0278971
447	2482.42	18	0.0278461
449	2482.47	18	0.027905
451	2482.52	18	0.0279172
453	2482.57	18	0.0279502
455	2482.62	18	0.0279265
457	2482.67	18	0.027876
459	2482.72	18	0.027851
461	2482.77	18	0.0278549
463	2482.82	18	0.0278922
465	2482.87	18	0.0279089
467	2482.92	18	0.0279533
469	2482.97	18	0.0279471
471	2483.02	18	0.0278808
473	2483.07	18	0.0278839
475	2483.12	18	0.0278856
477	2483.17	18	0.0278575
479	2483.22	18	0.0278303
481	2483.27	18	0.0278237
483	2483.32	18	0.0278154
485	2483.37	18	0.0278444
487	2483.42	18	0.0278009
489	2483.47	18	0.0277934
491	2483.52	18	0.0277684
493	2483.57	18	0.0278145
495	2483.62	18	0.0277921
497	2483.67	18	0.0277451
499	2483.72	18	0.0277908
501	2483.77	18	0.0278466
503	2483.82	18	0.0278106
505	2483.87	18	0.0277689
507	2483.92	18	0.0277561
509	2483.97	18	0.0277118
511	2484.02	18	0.0277315
513	2484.07	18	0.0278496
515	2484.12	18	0.0278435
517	2484.17	18	0.0277653
519	2484.22	18	0.0278198
521	2484.27	18	0.0277618
523	2484.32	18	0.0277693
525	2484.37	18	0.02775
527	2484.42	18	0.0277601
529	2484.47	18	0.0277737
531	2484.52	18	0.0278246
533	2484.57	18	0.0278
535	2484.62	18	0.0277991
537	2484.67	18	0.0277803
539	2484.72	18	0.0277789
541	2484.77	18	0.0278027
543	2484.82	18	0.0278049
545	2484.87	18	0.0277759
547	2484.92	18	0.0277592
549	2484.97	18	0.0277434
551	2485.02	18	0.0277302
553	2485.07	18	0.0277201
555	2485.12	18	0.0276999
557	2485.17	18	0.0276679
559	2485.22	18	0.0277263
561	2485.27	18	0.0276955
563	2485.32	18	0.0276762
565	2485.37	18	0.0277421
567	2485.42	18	0.0276336
569	2485.47	18	0.0276837
571	2485.52	18	0.0277609
573	2485.57	18	0.0276916
575	2485.62	18	0.0276468
577	2485.67	18	0.0276538
579	2485.72	18	0.0277065
581	2485.77	18	0.0277175
583	2485.82	18	0.0277223
585	2485.87	18	0.0276749
587	2485.92	18	0.0277153
589	2485.97	18	0.0277263
591	2486.02	18	0.0277921
593	2486.07	18	0.0277017
595	2486.12	18	0.0277122
597	2486.17	18	0.0276872
599	2486.22	18	0.0277034
601	2486.27	18	0.0276889
603	2486.32	18	0.0276863
605	2486.37	18	0.0276771
607	2486.42	18	0.0276819
609	2486.47	18	0.027685
611	2486.52	18	0.0276894
613	2486.57	18	0.0276284
615	2486.62	18	0.0276433
617	2486.67	18	0.0276503
619	2486.72	18	0.0276248
621	2486.77	18	0.0276806
623	2486.82	18	0.027663
625	2486.87	18	0.027678
627	2486.92	18	0.0276775
629	2486.97	18	0.0276551
631	2487.02	18	0.0276635
633	2487.07	18	0.0276086
635	2487.12	18	0.0276244
637	2487.17	18	0.0276714
639	2487.22	18	0.0276538
641	2487.27	18	0.0275959
643	2487.32	18	0.0276253
645	2487.37	18	0.027595
647	2487.42	18	0.0275963
649	2487.47	18	0.0275414
651	2487.52	18	0.0275335
653	2487.57	18	0.0275353
655	2487.62	18	0.0275594
657	2487.67	18	0.0274944
659	2487.72	18	0.0275199
661	2487.77	18	0.0275735
663	2487.82	18	0.0276275
665	2487.87	18	0.0276534
667	2487.92	18	0.0276635
669	2487.97	18	0.0276174
671	2488.02	18	0.0275928
673	2488.07	18	0.0276622
675	2488.12	18	0.0276644
677	2488.17	18	0.0276986
679	2488.22	18	0.0276486
681	2488.27	18	0.0276358
683	2488.32	18	0.0275722
685	2488.37	18	0.0275853
687	2488.42	18	0.0275713
689	2488.47	18	0.0276222
691	2488.52	18	0.0276222
693	2488.57	18	0.0276244
695	2488.62	18	0.0276758
697	2488.67	18	0.0276235
699	2488.72	18	0.0276086
701	2488.77	18	0.0276275
703	2488.82	18	0.0276525
705	2488.87	18	0.0275809
707	2488.92	18	0.0275976
709	2488.97	18	0.0275533
711	2489.02	18	0.0275994
713	2489.07	18	0.0276977
715	2489.12	18	0.0276898
717	2489.17	18	0.027642
719	2489.22	18	0.0276464
721	2489.27	18	0.0276854
723	2489.32	18	0.0276802
725	2489.37	18	0.0276314
727	2489.42	18	0.0275638
729	2489.47	18	0.0275656
731	2489.52	18	0.0275827
733	2489.57	18	0.0276169
735	2489.62	18	0.0276095
737	2489.67	18	0.0276082
739	2489.72	18	0.0275471
741	2489.77	18	0.0276819
743	2489.82	18	0.0275599
745	2489.87	18	0.0275831
747	2489.92	18	0.0276016
749	2489.97	18	0.0275476
751	2490.02	18	0.0276257
753	2490.07	18	0.0276306
755	2490.12	18	0.0276354
757	2490.17	18	0.0275967
759	2490.22	18	0.0276376
761	2490.27	18	0.0276889
763	2490.32	18	0.0276679
765	2490.37	18	0.0276033
767	2490.42	18	0.027584
769	2490.47	18	0.0275032
771	2490.52	18	0.0275072
773	2490.57	18	0.0275779
775	2490.62	18	0.0275146
777	2490.67	18	0.0276332
779	2490.72	18	0.0276788
781	2490.77	18	0.0276507
783	2490.82	18	0.0276104
785	2490.87	18	0.0276033
787	2490.92	18	0.0275932
789	2490.97	18	0.0275599
791	2491.02	18	0.0276077
793	2491.07	18	0.0276165
795	2491.12	18	0.0275638
797	2491.17	18	0.0275656
799	2491.22	18	0.0275713
801	2491.27	18	0.0275713
803	2491.32	18	0.0275774
805	2491.37	18	0.02762
807	2491.42	18	0.0275748
809	2491.47	18	0.027602
811	2491.52	18	0.0275331
813	2491.57	18	0.0275353
815	2491.62	18	0.0275735
817	2491.67	18	0.0275537
819	2491.72	18	0.0275401
821	2491.77	18	0.0275814
823	2491.82	18	0.027555
825	2491.87	18	0.0275375
827	2491.92	18	0.0275269
829	2491.97	18	0.0275217
831	2492.02	18	0.0275081
833	2492.07	18	0.0274813
835	2492.12	18	0.0275067
837	2492.17	18	0.0275015
839	2492.22	18	0.0275085
841	2492.27	18	0.0275304
843	2492.32	18	0.0274593
845	2492.37	18	0.0274642
847	2492.42	18	0.0274896
849	2492.47	18	0.0274576
851	2492.52	18	0.0274317
853	2492.57	18	0.027447
855	2492.62	18	0.0274685
857	2492.67	18	0.0274927
859	2492.72	18	0.0274001
861	2492.77	18	0.0274712
863	2492.82	18	0.0274365
865	2492.87	18	0.0274576
867	2492.92	18	0.0273961
869	2492.97	18	0.0273759
871	2493.02	18	0.027354
873	2493.07	18	0.0273399
875	2493.12	18	0.0273957
877	2493.17	18	0.0273496
879	2493.22	18	0.0273724
881	2493.27	18	0.0273557
883	2493.32	18	0.0273386
885	2493.37	18	0.0272947
887	2493.42	18	0.027328
889	2493.47	18	0.0273311
891	2493.52	18	0.0272736
893	2493.57	18	0.0272828
895	2493.62	18	0.0272025
897	2493.67	18	0.0272429
899	2493.72	18	0.0272951
901	2493.77	18	0.0272416
903	2493.82	18	0.0272912
905	2493.87	18	0.0273522
907	2493.92	18	0.0272903
909	2493.97	18	0.0273456
911	2494.02	18	0.0273965
913	2494.07	18	0.0274014
915	2494.12	18	0.0273755
917	2494.17	18	0.0273355
919	2494.22	18	0.0273381
921	2494.27	18	0.0272815
923	2494.32	18	0.0273623
925	2494.37	18	0.0273368
927	2494.42	18	0.0273351
929	2494.47	18	0.0273526
931	2494.52	18	0.0272885
933	2494.57	18	0.0273469
935	2494.62	18	0.0272846
937	2494.67	18	0.0273087
939	2494.72	18	0.027357
941	2494.77	18	0.0273114
943	2494.82	18	0.0273105
945	2494.87	18	0.0272661
947	2494.92	18	0.0272736
949	2494.97	18	0.0272973
951	2495.02	18	0.0273043
953	2495.07	18	0.0272407
955	2495.12	18	0.0272389
957	2495.17	18	0.0272082
959	2495.22	18	0.0272481
961	2495.27	18	0.0271814
963	2495.32	18	0.027224
965	2495.37	18	0.0272323
967	2495.42	18	0.0272108
969	2495.47	18	0.0272249
971	2495.52	18	0.0272402
973	2495.57	18	0.0272306
975	2495.62	18	0.0272165
977	2495.67	18	0.0272517
979	2495.72	18	0.0272503
981	2495.77	18	0.0272964
983	2495.82	18	0.0272679
985	2495.87	18	0.0272969
987	2495.92	18	0.0272323
989	2495.97	18	0.0272767
991	2496.02	18	0.0272991
993	2496.07	18	0.0272762
995	2496.12	18	0.027303
997	2496.17	18	0.0273575
999	2496.22	18	0.0273131
1001	2496.27	18	0.0273417
1003	2496.32	18	0.027321
1005	2496.37	18	0.0272604
1007	2496.42	18	0.0272789
1009	2496.47	18	0.0272683
1011	2496.52	18	0.0274022
1013	2496.57	18	0.0273403
1015	2496.62	18	0.0274242
1017	2496.67	18	0.0274233
1019	2496.72	18	0.0273289
1021	2496.77	18	0.0273373
1023	2496.82	18	0.0273351
1025	2496.87	18	0.0273048
1027	2496.92	18	0.0273583
1029	2496.97	18	0.0273465
1031	2497.02	18	0.0273592
1033	2497.07	18	0.0273469
1035	2497.12	18	0.0273285
1037	2497.17	18	0.0273851
1039	2497.22	18	0.0273733
1041	2497.27	18	0.0273267
1043	2497.32	18	0.0273799
1045	2497.37	18	0.0273746
1047	2497.42	18	0.027422
1049	2497.47	18	0.0273535
1051	2497.52	18	0.027415
1053	2497.57	18	0.0273759
1055	2497.62	18	0.0273184
1057	2497.67	18	0.0272376
1059	2497.72	18	0.027296
1061	2497.77	18	0.0272661
1063	2497.82	18	0.0273733
1065	2497.87	18	0.0273434
1067	2497.92	18	0.0273518
1069	2497.97	18	0.0273346
1071	2498.02	18	0.0273469
1073	2498.07	18	0.0273408
1075	2498.12	18	0.0273662
1077	2498.17	18	0.0272815
1079	2498.22	18	0.0273399
1081	2498.27	18	0.0272578
1083	2498.32	18	0.027328
1085	2498.37	18	0.027285
1087	2498.42	18	0.0273118
1089	2498.47	18	0.0272688
1091	2498.52	18	0.027332
1093	2498.57	18	0.0273175
1095	2498.62	18	0.0273856
1097	2498.67	18	0.0273983
1099	2498.72	18	0.0274062
1101	2498.77	18	0.0274036
1103	2498.82	18	0.0273785
1105	2498.87	18	0.0273531
1107	2498.92	18	0.0273873
1109	2498.97	18	0.0273399
1111	2499.02	18	0.0273829
1113	2499.07	18	0.0273004
1115	2499.12	18	0.0273368
1117	2499.17	18	0.027368
1119	2499.22	18	0.027375
1121	2499.27	18	0.0274167
1123	2499.32	18	0.027346
1125	2499.37	18	0.0273737
1127	2499.42	18	0.0273658
1129	2499.47	18	0.0273803
1131	2499.52	18	0.0273619
1133	2499.57	18	0.0274066
1135	2499.62	18	0.027343
1137	2499.67	18	0.0273921
1139	2499.72	18	0.0273377
1141	2499.77	18	0.0273741
1143	2499.82	18	0.0273794
1145	2499.87	18	0.0273447
1147	2499.92	18	0.027336
1149	2499.97	18	0.0273487
1151	2500.02	18	0.0274053
1153	2500.07	18	0.0273649
1155	2500.12	18	0.0273759
1157	2500.17	18	0.0273856
1159	2500.22	18	0.0272903
1161	2500.27	18	0.0273662
1163	2500.32	18	0.0274281
1165	2500.37	18	0.0273886
1167	2500.42	18	0.0273706
1169	2500.47	18	0.027354
1171	2500.52	18	0.0273399
1173	2500.57	18	0.0273171
1175	2500.62	18	0.0273324
1177	2500.67	18	0.0272815
1179	2500.72	18	0.0273741
1181	2500.77	18	0.0274001
1183	2500.82	18	0.0273904
1185	2500.87	18	0.0272815
1187	2500.92	18	0.0272635
1189	2500.97	18	0.0272517
1191	2501.02	18	0.0272429
1193	2501.07	18	0.0272802
1195	2501.12	18	0.0271551
1197	2501.17	18	0.0271463
1199	2501.22	18	0.0271542
1201	2501.27	18	0.0272578
1203	2501.32	18	0.0272639
1205	2501.37	18	0.0273421
1207	2501.42	18	0.0274101
1209	2501.47	18	0.0273878
1211	2501.52	18	0.0273847
1213	2501.57	18	0.0273662
1215	2501.62	18	0.0273737
1217	2501.67	18	0.0273935
1219	2501.72	18	0.0274005
1221	2501.77	18	0.0273478
1223	2501.82	18	0.0273662
1225	2501.87	18	0.027382
1227	2501.92	18	0.0274242
1229	2501.97	18	0.0273842
1231	2502.02	18	0.0273891
1233	2502.07	18	0.0273667
1235	2502.12	18	0.0273408
1237	2502.17	18	0.0273544
1239	2502.22	18	0.0273188
1241	2502.27	18	0.0272547
1243	2502.32	18	0.0273267
1245	2502.37	18	0.0273083
1247	2502.42	18	0.0273245
1249	2502.47	18	0.027361
1251	2502.52	18	0.0273245
1253	2502.57	18	0.0273509
1255	2502.62	18	0.0273658
1257	2502.67	18	0.0273715
1259	2502.72	18	0.0272855
1261	2502.77	18	0.0273013
1263	2502.82	18	0.0272749
1265	2502.87	18	0.0272938
1267	2502.92	18	0.0272209
1269	2502.97	18	0.0272416
1271	2503.02	18	0.0272503
1273	2503.07	18	0.0272402
1275	2503.12	18	0.027289
1277	2503.17	18	0.0272025
1279	2503.22	18	0.0271068
1281	2503.27	18	0.0271748
1283	2503.32	18	0.0271076
1285	2503.37	18	0.0270927
1287	2503.42	18	0.0271081
1289	2503.47	18	0.027069
1291	2503.52	18	0.027109
1293	2503.57	18	0.0271524
1295	2503.62	18	0.027094
1297	2503.67	18	0.027116
1299	2503.72	18	0.0271006
1301	2503.77	18	0.0270874
1303	2503.82	18	0.0270817
1305	2503.87	18	0.0270479
1307	2503.92	18	0.0271401
1309	2503.97	18	0.0271226
1311	2504.02	18	0.0270866
1313	2504.07	18	0.0271287
1315	2504.12	18	0.0270927
1317	2504.17	18	0.0270743
1319	2504.22	18	0.0270866
1321	2504.27	18	0.0270918
1323	2504.32	18	0.0270809
1325	2504.37	18	0.0270914
1327	2504.42	18	0.0271278
1329	2504.47	18	0.0271169
1331	2504.52	18	0.0271415
1333	2504.57	18	0.0271366
1335	2504.62	18	0.0270607
1337	2504.67	18	0.0271041
1339	2504.72	18	0.027069
1341	2504.77	18	0.0270106
1343	2504.82	18	0.02708
1345	2504.87	18	0.0270308
1347	2504.92	18	0.0270668
1349	2504.97	18	0.0270743
1351	2505.02	18	0.0270413
1353	2505.07	18	0.0269729
1355	2505.12	18	0.0269382
1357	2505.17	18	0.026871
1359	2505.22	18	0.0269206
1361	2505.27	18	0.0269724
1363	2505.32	18	0.0270159
1365	2505.37	18	0.0269843
1367	2505.42	18	0.0269544
1369	2505.47	18	0.026896
1371	2505.52	18	0.0269127
1373	2505.57	18	0.0270203
1375	2505.62	18	0.02699
1377	2505.67	18	0.0269847
1379	2505.72	18	0.0270501
1381	2505.77	18	0.0270137
1383	2505.82	18	0.0270247
1385	2505.87	18	0.0270493
1387	2505.92	18	0.0270664
1389	2505.97	18	0.0270185
1391	2506.02	18	0.0270352
1393	2506.07	18	0.0269509
1395	2506.12	18	0.0270633
1397	2506.17	18	0.027109
1399	2506.22	18	0.0271393
1401	2506.27	18	0.0270655
1403	2506.32	18	0.0270975
1405	2506.37	18	0.0271186
1407	2506.42	18	0.0270857
1409	2506.47	18	0.0270493
1411	2506.52	18	0.0270874
1413	2506.57	18	0.0271239
1415	2506.62	18	0.0271801
1417	2506.67	18	0.0271072
1419	2506.72	18	0.0272196
1421	2506.77	18	0.0271722
1423	2506.82	18	0.0271599
1425	2506.87	18	0.0271182
1427	2506.92	18	0.0270681
1429	2506.97	18	0.0270146
1431	2507.02	18	0.0269755
1433	2507.07	18	0.0269926
1435	2507.12	18	0.0269852
1437	2507.17	18	0.0270067
1439	2507.22	18	0.0270269
1441	2507.27	18	0.0269979
1443	2507.32	18	0.0270097
1445	2507.37	18	0.0270198
1447	2507.42	18	0.0270212
1449	2507.47	18	0.027004
1451	2507.52	18	0.0270027
1453	2507.57	18	0.0269909
1455	2507.62	18	0.0269843
1457	2507.67	18	0.0269636
1459	2507.72	18	0.0269961
1461	2507.77	18	0.0269544
1463	2507.82	18	0.026918
1465	2507.87	18	0.0269101
1467	2507.92	18	0.026914
1469	2507.97	18	0.0269838
1471	2508.02	18	0.026947
1473	2508.07	18	0.0269654
1475	2508.12	18	0.0269487
1477	2508.17	18	0.0269461
1479	2508.22	18	0.0268635
1481	2508.27	18	0.0269009
1483	2508.32	18	0.0269478
1485	2508.37	18	0.0269426
1487	2508.42	18	0.0269219
1489	2508.47	18	0.0270137
1491	2508.52	18	0.0269167
1493	2508.57	18	0.026997
1495	2508.62	18	0.0269118
1497	2508.67	18	0.0269307
1499	2508.72	18	0.0268881
1501	2508.77	18	0.026882
1503	2508.82	18	0.0269268
1505	2508.87	18	0.026943
1507	2508.92	18	0.0268872
1509	2508.97	18	0.0268433
1511	2509.02	18	0.0268429
1513	2509.07	18	0.0268618
1515	2509.12	18	0.0268631
1517	2509.17	18	0.0268534
1519	2509.22	18	0.0268451
1521	2509.27	18	0.0268315
1523	2509.32	18	0.0267674
1525	2509.37	18	0.0267217
1527	2509.42	18	0.0267213
1529	2509.47	18	0.0267507
1531	2509.52	18	0.0267639
1533	2509.57	18	0.0267349
1535	2509.62	18	0.0267037
1537	2509.67	18	0.0266699
1539	2509.72	18	0.026741
1541	2509.77	18	0.0267419
1543	2509.82	18	0.0266769
1545	2509.87	18	0.0266919
1547	2509.92	18	0.0266563
1549	2509.97	18	0.0266207
1551	2510.02	18	0.0266361
1553	2510.07	18	0.0266383
1555	2510.12	18	0.0266471
1557	2510.17	18	0.0266502
1559	2510.22	18	0.0266725
1561	2510.27	18	0.026666
1563	2510.32	18	0.02668
1565	2510.37	18	0.0266677
1567	2510.42	18	0.0266172
1569	2510.47	18	0.0266651
1571	2510.52	18	0.0266695
1573	2510.57	18	0.0266686
1575	2510.62	18	0.0266251
1577	2510.67	18	0.0266484
1579	2510.72	18	0.0266374
1581	2510.77	18	0.0265997
1583	2510.82	18	0.0265966
1585	2510.87	18	0.0266089
1587	2510.92	18	0.0266177
1589	2510.97	18	0.0266414
1591	2511.02	18	0.0266436
1593	2511.07	18	0.0266778
1595	2511.12	18	0.026691
1597	2511.17	18	0.0266458
1599	2511.22	18	0.0266778
1601	2511.27	18	0.0266923
1603	2511.32	18	0.0266967
1605	2511.37	18	0.0267226
1607	2511.42	18	0.0267735
1609	2511.47	18	0.026774
1611	2511.52	18	0.0268065
1613	2511.57	18	0.0268095
1615	2511.62	18	0.0268324
1617	2511.67	18	0.0268381
1619	2511.72	18	0.0268442
1621	2511.77	18	0.0267928
1623	2511.82	18	0.0268868
1625	2511.87	18	0.0268332
1627	2511.92	18	0.0268253
1629	2511.97	18	0.0268337
1631	2512.02	18	0.0268548
1633	2512.07	18	0.0268771
1635	2512.12	18	0.0268692
1637	2512.17	18	0.0268561
1639	2512.22	18	0.0269083
1641	2512.27	18	0.0268719
1643	2512.32	18	0.0268504
1645	2512.37	18	0.0268609
1647	2512.42	18	0.0268899
1649	2512.47	18	0.0268846
1651	2512.52	18	0.026882
1653	2512.57	18	0.0268583
1655	2512.62	18	0.0268407
1657	2512.67	18	0.0268811
1659	2512.72	18	0.0268596
1661	2512.77	18	0.0268556
1663	2512.82	18	0.0268095
1665	2512.87	18	0.0267691
1667	2512.92	18	0.0267169
1669	2512.97	18	0.0266805
1671	2513.02	18	0.0266247
1673	2513.07	18	0.0266682
1675	2513.12	18	0.0266177
1677	2513.17	18	0.0266128
1679	2513.22	18	0.0266765
1681	2513.27	18	0.0267678
1683	2513.32	18	0.0267863
1685	2513.37	18	0.0267854
1687	2513.42	18	0.0267661
1689	2513.47	18	0.0267994
1691	2513.52	18	0.0268047
1693	2513.57	18	0.0268122
1695	2513.62	18	0.0267924
1697	2513.67	18	0.0267801
1699	2513.72	18	0.02677
1701	2513.77	18	0.0267977
1703	2513.82	18	0.0267309
1705	2513.87	18	0.0267191
1707	2513.92	18	0.0267586
1709	2513.97	18	0.0267893
1711	2514.02	18	0.0267819
1713	2514.07	18	0.0267292
1715	2514.12	18	0.0267779
1717	2514.17	18	0.0267937
1719	2514.22	18	0.0268719
1721	2514.27	18	0.0268245
1723	2514.32	18	0.0268385
1725	2514.37	18	0.0267964
1727	2514.42	18	0.0268403
1729	2514.47	18	0.0269074
1731	2514.52	18	0.0268635
1733	2514.57	18	0.0268556
1735	2514.62	18	0.0268499
1737	2514.67	18	0.0268583
1739	2514.72	18	0.0268565
1741	2514.77	18	0.0268526
1743	2514.82	18	0.0268653
1745	2514.87	18	0.0268815
1747	2514.92	18	0.0268864
1749	2514.97	18	0.0268574
1751	2515.02	18	0.0269329
1753	2515.07	18	0.0269171
1755	2515.12	18	0.0269601
1757	2515.17	18	0.027015
1759	2515.22	18	0.0270624
1761	2515.27	18	0.0270115
1763	2515.32	18	0.0269746
1765	2515.37	18	0.0270194
1767	2515.42	18	0.0269246
1769	2515.47	18	0.0269715
1771	2515.52	18	0.0270062
1773	2515.57	18	0.0269803
1775	2515.62	18	0.0269654
1777	2515.67	18	0.0269237
1779	2515.72	18	0.0269408
1781	2515.77	18	0.0269465
1783	2515.82	18	0.0268864
1785	2515.87	18	0.0268991
1787	2515.92	18	0.0268973
1789	2515.97	18	0.0268372
1791	2516.02	18	0.0268631
1793	2516.07	18	0.0268526
1795	2516.12	18	0.026824
1797	2516.17	18	0.0268433
1799	2516.22	18	0.02686
1801	2516.27	18	0.0269219
1803	2516.32	18	0.0269017
1805	2516.37	18	0.0268965
1807	2516.42	18	0.0268688
1809	2516.47	18	0.0268627
1811	2516.52	18	0.0268376
1813	2516.57	18	0.0269057
1815	2516.62	18	0.0268504
1817	2516.67	18	0.026792
1819	2516.72	18	0.0268034
1821	2516.77	18	0.0267727
1823	2516.82	18	0.0268306
1825	2516.87	18	0.0267819
1827	2516.92	18	0.0268394
1829	2516.97	18	0.0268196
1831	2517.02	18	0.0268706
1833	2517.07	18	0.0268398
1835	2517.12	18	0.0268043
1837	2517.17	18	0.026799
1839	2517.22	18	0.026817
1841	2517.27	18	0.0268337
1843	2517.32	18	0.0268289
1845	2517.37	18	0.0268337
1847	2517.42	18	0.026824
1849	2517.47	18	0.0267836
1851	2517.52	18	0.0268144
1853	2517.57	18	0.026788
1855	2517.62	18	0.0267626
1857	2517.67	18	0.0268073
1859	2517.72	18	0.0267757
1861	2517.77	18	0.0267441
1863	2517.82	18	0.0268201
1865	2517.87	18	0.0267406
1867	2517.92	18	0.0267011
1869	2517.97	18	0.0267792
1871	2518.02	18	0.0267371
1873	2518.07	18	0.0267748
1875	2518.12	18	0.0267577
1877	2518.17	18	0.0267547
1879	2518.22	18	0.0267643
1881	2518.27	18	0.0267937
1883	2518.32	18	0.0267828
1885	2518.37	18	0.0267371
1887	2518.42	18	0.0266769
1889	2518.47	18	0.026734
1891	2518.52	18	0.0266813
1893	2518.57	18	0.0267252
1895	2518.62	18	0.0266761
1897	2518.67	18	0.026705
1899	2518.72	18	0.0266906
1901	2518.77	18	0.0267353
1903	2518.82	18	0.0266936
1905	2518.87	18	0.0267033
1907	2518.92	18	0.0266199
1909	2518.97	18	0.0266405
1911	2519.02	18	0.0266668
1913	2519.07	18	0.0266484
1915	2519.12	18	0.0266528
1917	2519.17	18	0.0266449
1919	2519.22	18	0.0266677
1921	2519.27	18	0.0266884
1923	2519.32	18	0.0266383
1925	2519.37	18	0.0266976
1927	2519.42	18	0.0266976
1929	2519.47	18	0.0266813
1931	2519.52	18	0.0267814
1933	2519.57	18	0.0267573
1935	2519.62	18	0.0267235
1937	2519.67	18	0.0267586
1939	2519.72	18	0.0267828
1941	2519.77	18	0.0267511
1943	2519.82	18	0.0266958
1945	2519.87	18	0.0266769
1947	2519.92	18	0.0266352
1949	2519.97	18	0.0266607
1951	2520.02	18	0.0266405
1953	2520.07	18	0.0267138
1955	2520.12	18	0.026669
1957	2520.17	18	0.026648
1959	2520.22	18	0.0266945
1961	2520.27	18	0.0267077
1963	2520.32	18	0.0267103
1965	2520.37	18	0.0267266
1967	2520.42	18	0.0267871
1969	2520.47	18	0.026842
1971	2520.52	18	0.0268447
1973	2520.57	18	0.0268666
1975	2520.62	18	0.0268881
1977	2520.67	18	0.0268569
1979	2520.72	18	0.0269197
1981	2520.77	18	0.0269228
1983	2520.82	18	0.0269206
1985	2520.87	18	0.0268965
1987	2520.92	18	0.0268662
1989	2520.97	18	0.0268469
1991	2521.02	18	0.0268297
1993	2521.07	18	0.026889
1995	2521.12	18	0.0267788
1997	2521.17	18	0.0268293
1999	2521.22	18	0.0267621
2001	2521.27	18	0.0268627
2003	2521.32	18	0.0268152
2005	2521.37	18	0.0267573
2007	2521.42	18	0.0268087
2009	2521.47	18	0.0267744
2011	2521.52	18	0.0267915
2013	2521.57	18	0.0267691
2015	2521.62	18	0.0267406
2017	2521.67	18	0.0267077
2019	2521.72	18	0.0267134
2021	2521.77	18	0.0267165
2023	2521.82	18	0.0267507
2025	2521.87	18	0.0267437
2027	2521.92	18	0.026741
2029	2521.97	18	0.0267586
2031	2522.02	18	0.026792
2033	2522.07	18	0.0267841
2035	2522.12	18	0.0267287
2037	2522.17	18	0.0267419
2039	2522.22	18	0.0266945
2041	2522.27	18	0.0266941
2043	2522.32	18	0.0267287
2045	2522.37	18	0.0267077
2047	2522.42	18	0.0266572
2049	2522.47	18	0.0267217
2051	2522.52	18	0.0266466
2053	2522.57	18	0.0266291
2055	2522.62	18	0.0266436
2057	2522.67	18	0.0266765
2059	2522.72	18	0.0266225
2061	2522.77	18	0.0267103
2063	2522.82	18	0.0266668
2065	2522.87	18	0.0266076
2067	2522.92	18	0.0266857
2069	2522.97	18	0.0266541
2071	2523.02	18	0.0266892
2073	2523.07	18	0.0266954
2075	2523.12	18	0.0266936
2077	2523.17	18	0.0266475
2079	2523.22	18	0.02668
2081	2523.27	18	0.026691
2083	2523.32	18	0.0266725
2085	2523.37	18	0.0267331
2087	2523.42	18	0.0268087
2089	2523.47	18	0.0267828
2091	2523.52	18	0.0267898
2093	2523.57	18	0.0267608
2095	2523.62	18	0.0267981
2097	2523.67	18	0.0267573
2099	2523.72	18	0.0266813
2101	2523.77	18	0.0266418
2103	2523.82	18	0.0265909
2105	2523.87	18	0.0265602
2107	2523.92	18	0.0266212
2109	2523.97	18	0.0265962
2111	2524.02	18	0.0266462
2113	2524.07	18	0.0267415
2115	2524.12	18	0.0267362
2117	2524.17	18	0.0266633
2119	2524.22	18	0.0266418
2121	2524.27	18	0.0267156
2123	2524.32	18	0.0266892
2125	2524.37	18	0.0266848
2127	2524.42	18	0.0266418
2129	2524.47	18	0.0266054
2131	2524.52	18	0.0266304
2133	2524.57	18	0.0266084
2135	2524.62	18	0.0266137
2137	2524.67	18	0.0266576
2139	2524.72	18	0.0265953
2141	2524.77	18	0.0266392
2143	2524.82	18	0.02659
2145	2524.87	18	0.0266054
2147	2524.92	18	0.0266695
2149	2524.97	18	0.0266326
2151	2525.02	18	0.0265689
2153	2525.07	18	0.0265988
2155	2525.12	18	0.0265527
2157	2525.17	18	0.0265707
2159	2525.22	18	0.0265685
2161	2525.27	18	0.0265307
2163	2525.32	18	0.0266032
2165	2525.37	18	0.0265966
2167	2525.42	18	0.0265874
2169	2525.47	18	0.0266256
2171	2525.52	18	0.0266212
2173	2525.57	18	0.026608
2175	2525.62	18	0.0266581
2177	2525.67	18	0.0265843
2179	2525.72	18	0.0266041
2181	2525.77	18	0.0265861
2183	2525.82	18	0.0265935
2185	2525.87	18	0.0266225
2187	2525.92	18	0.0266199
2189	2525.97	18	0.0266286
2191	2526.02	18	0.0265272
2193	2526.07	18	0.0265523
2195	2526.12	18	0.026561
2197	2526.17	18	0.0265171
2199	2526.22	18	0.0265685
2201	2526.27	18	0.0265343
2203	2526.32	18	0.0265127
2205	2526.37	18	0.0265641
2207	2526.42	18	0.0265281
2209	2526.47	18	0.0266076
2211	2526.52	18	0.0265804
2213	2526.57	18	0.0266348
2215	2526.62	18	0.026597
2217	2526.67	18	0.026662
2219	2526.72	18	0.0267309
2221	2526.77	18	0.0267173
2223	2526.82	18	0.0267208
2225	2526.87	18	0.0266475
2227	2526.92	18	0.0266401
2229	2526.97	18	0.0266743
2231	2527.02	18	0.0267336
2233	2527.07	18	0.0266884
2235	2527.12	18	0.0266985
2237	2527.17	18	0.0267204
2239	2527.22	18	0.0267287
2241	2527.27	18	0.0267103
2243	2527.32	18	0.0266848
2245	2527.37	18	0.0267143
2247	2527.42	18	0.0266563
2249	2527.47	18	0.0266317
2251	2527.52	18	0.0267165
2253	2527.57	18	0.0266436
2255	2527.62	18	0.0267015
2257	2527.67	18	0.0266971
2259	2527.72	18	0.0267274
2261	2527.77	18	0.0267485
2263	2527.82	18	0.0267358
2265	2527.87	18	0.0267011
2267	2527.92	18	0.0266642
2269	2527.97	18	0.0266699
2271	2528.02	18	0.0267116
2273	2528.07	18	0.0266721
2275	2528.12	18	0.0266677
2277	2528.17	18	0.0266743
2279	2528.22	18	0.0266822
2281	2528.27	18	0.0266813
2283	2528.32	18	0.0266743
2285	2528.37	18	0.026673
2287	2528.42	18	0.0266401
2289	2528.47	18	0.0266475
2291	2528.52	18	0.0266291
2293	2528.57	18	0.0266739
2295	2528.62	18	0.0266286
2297	2528.67	18	0.026666
2299	2528.72	18	0.0266906
2301	2528.77	18	0.0266932
2303	2528.82	18	0.0266805
2305	2528.87	18	0.0266541
2307	2528.92	18	0.0267362
2309	2528.97	18	0.0266945
2311	2529.02	18	0.0266436
2313	2529.07	18	0.0266304
2315	2529.12	18	0.0266695
2317	2529.17	18	0.0266269
2319	2529.22	18	0.0266014
2321	2529.27	18	0.0265654
2323	2529.32	18	0.0266247
2325	2529.37	18	0.0266497
2327	2529.42	18	0.0266089
2329	2529.47	18	0.0266041
2331	2529.52	18	0.0266826
2333	2529.57	18	0.0266418
2335	2529.62	18	0.0266014
2337	2529.67	18	0.026637
2339	2529.72	18	0.0266488
2341	2529.77	18	0.0266212
2343	2529.82	18	0.0265979
2345	2529.87	18	0.0266106
2347	2529.92	18	0.0266352
2349	2529.97	18	0.0266041
2351	2530.02	18	0.0266646
2353	2530.07	18	0.0265667
2355	2530.12	18	0.0266071
2357	2530.17	18	0.0266203
2359	2530.22	18	0.026583
2361	2530.27	18	0.0265856
2363	2530.32	18	0.0266642
2365	2530.37	18	0.0266524
2367	2530.42	18	0.0267064
2369	2530.47	18	0.0267968
2371	2530.52	18	0.0267687
2373	2530.57	18	0.0267691
2375	2530.62	18	0.026745
2377	2530.67	18	0.0267885
2379	2530.72	18	0.0267744
2381	2530.77	18	0.0267454
2383	2530.82	18	0.0268271
2385	2530.87	18	0.026864
2387	2530.92	18	0.0267656
2389	2530.97	18	0.0268113
2391	2531.02	18	0.0267814
2393	2531.07	18	0.026752
2395	2531.12	18	0.0266949
2397	2531.17	18	0.0267169
2399	2531.22	18	0.0267393
2401	2531.27	18	0.0267476
2403	2531.32	18	0.0266813
2405	2531.37	18	0.0267068
2407	2531.42	18	0.0266813
2409	2531.47	18	0.0267617
2411	2531.52	18	0.0267744
2413	2531.57	18	0.0267608
2415	2531.62	18	0.0267331
2417	2531.67	18	0.0266848
2419	2531.72	18	0.026687
2421	2531.77	18	0.0266269
2423	2531.82	18	0.0265694
2425	2531.87	18	0.026597
2427	2531.92	18	0.0266023
2429	2531.97	18	0.0266172
2431	2532.02	18	0.0267116
2433	2532.07	18	0.0266664
2435	2532.12	18	0.0266989
2437	2532.17	18	0.0267042
2439	2532.22	18	0.0267485
2441	2532.27	18	0.0266581
2443	2532.32	18	0.0267134
2445	2532.37	18	0.0266616
2447	2532.42	18	0.0266769
2449	2532.47	18	0.0267309
2451	2532.52	18	0.0267446
2453	2532.57	18	0.0267081
2455	2532.62	18	0.0267059
2457	2532.67	18	0.0266567
2459	2532.72	18	0.0266177
2461	2532.77	18	0.0266392
2463	2532.82	18	0.0265694
2465	2532.87	18	0.0266502
2467	2532.92	18	0.0266084
2469	2532.97	18	0.0266475
2471	2533.02	18	0.0266361
2473	2533.07	18	0.0266181
2475	2533.12	18	0.0265764
2477	2533.17	18	0.0265707
2479	2533.22	18	0.0264649
2481	2533.27	18	0.0264254
2483	2533.32	18	0.0264557
2485	2533.37	18	0.0263832
2487	2533.42	18	0.026424
2489	2533.47	18	0.0263793
2491	2533.52	18	0.0264574
2493	2533.57	18	0.0264078
2495	2533.62	18	0.0264917
2497	2533.67	18	0.0264925
2499	2533.72	18	0.026547
2501	2533.77	18	0.0264987
2503	2533.82	18	0.0265518
2505	2533.87	18	0.0265031
2507	2533.92	18	0.0265018
2509	2533.97	18	0.0265255
2511	2534.02	18	0.026536
2513	2534.07	18	0.0265215
2515	2534.12	18	0.0264754
2517	2534.17	18	0.0264921
2519	2534.22	18	0.0264096
2521	2534.27	18	0.0265
2523	2534.32	18	0.0264434
2525	2534.37	18	0.026421
2527	2534.42	18	0.0264394
2529	2534.47	18	0.0264754
2531	2534.52	18	0.0264298
2533	2534.57	18	0.0264262
2535	2534.62	18	0.0263854
2537	2534.67	18	0.0263731
2539	2534.72	18	0.0263797
2541	2534.77	18	0.0264363
2543	2534.82	18	0.0264429
2545	2534.87	18	0.02645
2547	2534.92	18	0.0264166
2549	2534.97	18	0.0265057
2551	2535.02	18	0.0264732
2553	2535.07	18	0.0264381
2555	2535.12	18	0.0264131
2557	2535.17	18	0.026396
2559	2535.22	18	0.0264412
2561	2535.27	18	0.0264846
2563	2535.32	18	0.0264772
2565	2535.37	18	0.0264965
2567	2535.42	18	0.0264785
2569	2535.47	18	0.0264939
2571	2535.52	18	0.0264947
2573	2535.57	18	0.026453
2575	2535.62	18	0.0264043
2577	2535.67	18	0.0264183
2579	2535.72	18	0.0264434
2581	2535.77	18	0.0264701
2583	2535.82	18	0.0265386
2585	2535.87	18	0.0264996
2587	2535.92	18	0.0264763
2589	2535.97	18	0.0264723
2591	2536.02	18	0.0264952
2593	2536.07	18	0.0264662
2595	2536.12	18	0.0265667
2597	2536.17	18	0.026579
2599	2536.22	18	0.0265338
2601	2536.27	18	0.0265632
2603	2536.32	18	0.0266273
2605	2536.37	18	0.0266102
2607	2536.42	18	0.0266137
2609	2536.47	18	0.0266001
2611	2536.52	18	0.0266682
2613	2536.57	18	0.0266014
2615	2536.62	18	0.0266401
2617	2536.67	18	0.0265773
2619	2536.72	18	0.0265413
2621	2536.77	18	0.0265443
2623	2536.82	18	0.0265615
2625	2536.87	18	0.0265733
2627	2536.92	18	0.0264754
2629	2536.97	18	0.0264741
2631	2537.02	18	0.0265136
2633	2537.07	18	0.0265123
2635	2537.12	18	0.0265645
2637	2537.17	18	0.0265422
2639	2537.22	18	0.0265711
2641	2537.27	18	0.0265839
2643	2537.32	18	0.0265448
2645	2537.37	18	0.0266093
2647	2537.42	18	0.0265097
2649	2537.47	18	0.0265211
2651	2537.52	18	0.0264658
2653	2537.57	18	0.0265356
2655	2537.62	18	0.0265483
2657	2537.67	18	0.0264943
2659	2537.72	18	0.0265154
2661	2537.77	18	0.0265127
2663	2537.82	18	0.0264421
2665	2537.87	18	0.0264965
2667	2537.92	18	0.0265026
2669	2537.97	18	0.0264754
2671	2538.02	18	0.0264565
2673	2538.07	18	0.0264543
2675	2538.12	18	0.0264706
2677	2538.17	18	0.0263977
2679	2538.22	18	0.026446
2681	2538.27	18	0.0264434
2683	2538.32	18	0.0263801
2685	2538.37	18	0.026435
2687	2538.42	18	0.0264157
2689	2538.47	18	0.026385
2691	2538.52	18	0.0264017
2693	2538.57	18	0.0263806
2695	2538.62	18	0.026435
2697	2538.67	18	0.0264407
2699	2538.72	18	0.0264377
2701	2538.77	18	0.0264302
2703	2538.82	18	0.0263332
2705	2538.87	18	0.0263806
2707	2538.92	18	0.026334
2709	2538.97	18	0.0263771
2711	2539.02	18	0.0263354
2713	2539.07	18	0.0263679
2715	2539.12	18	0.0264012
2717	2539.17	18	0.0263828
2719	2539.22	18	0.0264219
2721	2539.27	18	0.0264293
2723	2539.32	18	0.0264258
2725	2539.37	18	0.026432
2727	2539.42	18	0.026392
2729	2539.47	18	0.0264355
2731	2539.52	18	0.0264284
2733	2539.57	18	0.0264047
2735	2539.62	18	0.0264135
2737	2539.67	18	0.0264069
2739	2539.72	18	0.0263876
2741	2539.77	18	0.0263806
2743	2539.82	18	0.0264249
2745	2539.87	18	0.0264298
2747	2539.92	18	0.0264513
2749	2539.97	18	0.0264311
2751	2540.02	18	0.0264517
2753	2540.07	18	0.0263652
2755	2540.12	18	0.0264021
2757	2540.17	18	0.0264183
2759	2540.22	18	0.0264087
2761	2540.27	18	0.0263758
2763	2540.32	18	0.0263297
2765	2540.37	18	0.0263138
2767	2540.42	18	0.0262423
2769	2540.47	18	0.0262164
2771	2540.52	18	0.0262094
2773	2540.57	18	0.0261703
2775	2540.62	18	0.0261856
2777	2540.67	18	0.0262164
2779	2540.72	18	0.0262511
2781	2540.77	18	0.0262998
2783	2540.82	18	0.0261764
2785	2540.87	18	0.0262849
2787	2540.92	18	0.0262418
2789	2540.97	18	0.0263305
2791	2541.02	18	0.0263819
2793	2541.07	18	0.0263551
2795	2541.12	18	0.0263512
2797	2541.17	18	0.026345
2799	2541.22	18	0.026392
2801	2541.27	18	0.0263398
2803	2541.32	18	0.026374
2805	2541.37	18	0.0262783
2807	2541.42	18	0.0263525
2809	2541.47	18	0.0263117
2811	2541.52	18	0.0263231
2813	2541.57	18	0.0263376
2815	2541.62	18	0.0262642
2817	2541.67	18	0.0262317
2819	2541.72	18	0.0262761
2821	2541.77	18	0.026302
2823	2541.82	18	0.0263051
2825	2541.87	18	0.0262985
2827	2541.92	18	0.0262897
2829	2541.97	18	0.0263024
2831	2542.02	18	0.0262906
2833	2542.07	18	0.0262923
2835	2542.12	18	0.0262805
2837	2542.17	18	0.0263398
2839	2542.22	18	0.0263213
2841	2542.27	18	0.0262072
2843	2542.32	18	0.0262366
2845	2542.37	18	0.0262787
2847	2542.42	18	0.0262726
2849	2542.47	18	0.0262796
2851	2542.52	18	0.0262695
2853	2542.57	18	0.0263002
2855	2542.62	18	0.0263178
2857	2542.67	18	0.0263182
2859	2542.72	18	0.0263099
2861	2542.77	18	0.026327
2863	2542.82	18	0.0262972
2865	2542.87	18	0.026266
2867	2542.92	18	0.0262476
2869	2542.97	18	0.0262647
2871	2543.02	18	0.0262541
2873	2543.07	18	0.0262884
2875	2543.12	18	0.0263402
2877	2543.17	18	0.0263174
2879	2543.22	18	0.0263336
2881	2543.27	18	0.0262673
2883	2543.32	18	0.026302
2885	2543.37	18	0.0262269
2887	2543.42	18	0.0262256
2889	2543.47	18	0.0262519
2891	2543.52	18	0.0262296
2893	2543.57	18	0.0262366
2895	2543.62	18	0.0262133
2897	2543.67	18	0.0262436
2899	2543.72	18	0.0262296
2901	2543.77	18	0.026266
2903	2543.82	18	0.0262699
2905	2543.87	18	0.0262699
2907	2543.92	18	0.0262282
2909	2543.97	18	0.0262844
2911	2544.02	18	0.0262717
2913	2544.07	18	0.0262748
2915	2544.12	18	0.0262476
2917	2544.17	18	0.0262765
2919	2544.22	18	0.0262937
2921	2544.27	18	0.0262809
2923	2544.32	18	0.0262928
2925	2544.37	18	0.0263029
2927	2544.42	18	0.0262471
2929	2544.47	18	0.0262682
2931	2544.52	18	0.0262994
2933	2544.57	18	0.0263042
2935	2544.62	18	0.0263103
2937	2544.67	18	0.0263402
2939	2544.72	18	0.0263494
2941	2544.77	18	0.0262699
2943	2544.82	18	0.0262849
2945	2544.87	18	0.0263841
2947	2544.92	18	0.0264662
2949	2544.97	18	0.0265053
2951	2545.02	18	0.0264912
2953	2545.07	18	0.0264846
2955	2545.12	18	0.0265566
2957	2545.17	18	0.0264539
2959	2545.22	18	0.0264407
2961	2545.27	18	0.0264039
2963	2545.32	18	0.026345
2965	2545.37	18	0.0262866
2967	2545.42	18	0.026316
2969	2545.47	18	0.0262989
2971	2545.52	18	0.0262994
2973	2545.57	18	0.0262282
2975	2545.62	18	0.0262932
2977	2545.67	18	0.0262708
2979	2545.72	18	0.0263213
2981	2545.77	18	0.0263059
2983	2545.82	18	0.0262888
2985	2545.87	18	0.0262704
2987	2545.92	18	0.0262208
2989	2545.97	18	0.0262304
2991	2546.02	18	0.0262735
2993	2546.07	18	0.0262691
2995	2546.12	18	0.0262673
2997	2546.17	18	0.0262533
2999	2546.22	18	0.0263042
3001	2546.27	18	0.0263389
3003	2546.32	18	0.0262884
3005	2546.37	18	0.0262559
3007	2546.42	18	0.0262642
3009	2546.47	18	0.0262348
3011	2546.52	18	0.0262954
3013	2546.57	18	0.0263011
3015	2546.62	18	0.0262124
3017	2546.67	18	0.026205
3019	2546.72	18	0.0261835
3021	2546.77	18	0.0262296
3023	2546.82	18	0.0262353
3025	2546.87	18	0.0262304
3027	2546.92	18	0.0262331
3029	2546.97	18	0.0261953
3031	2547.02	18	0.0262067
3033	2547.07	18	0.0262107
3035	2547.12	18	0.0261808
3037	2547.17	18	0.0261426
3039	2547.22	18	0.0261202
3041	2547.27	18	0.0261088
3043	2547.32	18	0.0261172
3045	2547.37	18	0.0260948
3047	2547.42	18	0.0261097
3049	2547.47	18	0.0261106
3051	2547.52	18	0.0261501
3053	2547.57	18	0.0262506
3055	2547.62	18	0.0262168
3057	2547.67	18	0.0262357
3059	2547.72	18	0.0262388
3061	2547.77	18	0.0262146
3063	2547.82	18	0.0262181
3065	2547.87	18	0.0261426
3067	2547.92	18	0.0260904
3069	2547.97	18	0.0261281
3071	2548.02	18	0.0260552
3073	2548.07	18	0.0260877
3075	2548.12	18	0.0260794
3077	2548.17	18	0.0260934
3079	2548.22	18	0.026151
3081	2548.27	18	0.0261312
3083	2548.32	18	0.0261457
3085	2548.37	18	0.0261264
3087	2548.42	18	0.0261558
3089	2548.47	18	0.0261325
3091	2548.52	18	0.0262028
3093	2548.57	18	0.0261909
3095	2548.62	18	0.0261681
3097	2548.67	18	0.0261742
3099	2548.72	18	0.0261861
3101	2548.77	18	0.0261567
3103	2548.82	18	0.0262058
3105	2548.87	18	0.0262225
3107	2548.92	18	0.0262335
3109	2548.97	18	0.0261953
3111	2549.02	18	0.0261211
3113	2549.07	18	0.0261589
3115	2549.12	18	0.0261567
3117	2549.17	18	0.0261619
3119	2549.22	18	0.0261909
3121	2549.27	18	0.0261224
3123	2549.32	18	0.0261602
3125	2549.37	18	0.0261799
3127	2549.42	18	0.0261611
3129	2549.47	18	0.0261742
3131	2549.52	18	0.0261813
3133	2549.57	18	0.0261615
3135	2549.62	18	0.0261483
3137	2549.67	18	0.0261435
3139	2549.72	18	0.026176
3141	2549.77	18	0.0262041
3143	2549.82	18	0.02614
3145	2549.87	18	0.026151
3147	2549.92	18	0.0261514
3149	2549.97	18	0.0261352
3151	2550.02	18	0.026201
3153	2550.07	18	0.0261575
3155	2550.12	18	0.0261755
3157	2550.17	18	0.0262089
3159	2550.22	18	0.0262015
3161	2550.27	18	0.0261962
3163	2550.32	18	0.0262168
3165	2550.37	18	0.026136
3167	2550.42	18	0.0261975
3169	2550.47	18	0.0261668
3171	2550.52	18	0.0261966
3173	2550.57	18	0.0261874
3175	2550.62	18	0.0262067
3177	2550.67	18	0.0261198
3179	2550.72	18	0.0261966
3181	2550.77	18	0.0261049
3183	2550.82	18	0.0262019
3185	2550.87	18	0.0261668
3187	2550.92	18	0.0261448
3189	2550.97	18	0.0262173
3191	2551.02	18	0.0262243
3193	2551.07	18	0.0261918
3195	2551.12	18	0.0261734
3197	2551.17	18	0.0261703
3199	2551.22	18	0.0261655
3201	2551.27	18	0.026176
3203	2551.32	18	0.0261909
3205	2551.37	18	0.0261843
3207	2551.42	18	0.0261527
3209	2551.47	18	0.0261791
3211	2551.52	18	0.0261808
3213	2551.57	18	0.0262177
3215	2551.62	18	0.0262682
3217	2551.67	18	0.0262809
3219	2551.72	18	0.0262954
3221	2551.77	18	0.0262994
3223	2551.82	18	0.0263024
3225	2551.87	18	0.0262866
3227	2551.92	18	0.026313
3229	2551.97	18	0.0263147
3231	2552.02	18	0.0262445
3233	2552.07	18	0.0263362
3235	2552.12	18	0.0262326
3237	2552.17	18	0.0262598
3239	2552.22	18	0.0262493
3241	2552.27	18	0.0262555
3243	2552.32	18	0.0262629
3245	2552.37	18	0.0262418
3247	2552.42	18	0.0261865
3249	2552.47	18	0.0262357
3251	2552.52	18	0.0262339
3253	2552.57	18	0.0262116
3255	2552.62	18	0.0261461
3257	2552.67	18	0.0261492
3259	2552.72	18	0.0261154
3261	2552.77	18	0.026133
3263	2552.82	18	0.0261066
3265	2552.87	18	0.0260803
3267	2552.92	18	0.0260091
3269	2552.97	18	0.0260526
3271	2553.02	18	0.0260337
3273	2553.07	18	0.0261277
3275	2553.12	18	0.026136
3277	2553.17	18	0.026111
3279	2553.22	18	0.0261189
3281	2553.27	18	0.0261536
3283	2553.32	18	0.0260842
3285	2553.37	18	0.0261444
3287	2553.42	18	0.0261479
3289	2553.47	18	0.0261685
3291	2553.52	18	0.026208
3293	2553.57	18	0.0261593
3295	2553.62	18	0.0261597
3297	2553.67	18	0.0261492
3299	2553.72	18	0.0261865
3301	2553.77	18	0.0261843
3303	2553.82	18	0.0262339
3305	2553.87	18	0.0262072
3307	2553.92	18	0.0261404
3309	2553.97	18	0.026205
3311	2554.02	18	0.026208
3313	2554.07	18	0.0262023
3315	2554.12	18	0.0262831
3317	2554.17	18	0.0262555
3319	2554.22	18	0.0262827
3321	2554.27	18	0.0262778
3323	2554.32	18	0.0262958
3325	2554.37	18	0.0262089
3327	2554.42	18	0.0261979
3329	2554.47	18	0.0262181
3331	2554.52	18	0.0262234
3333	2554.57	18	0.0262124
3335	2554.62	18	0.0262287
3337	2554.67	18	0.0262054
3339	2554.72	18	0.0261922
3341	2554.77	18	0.0261729
3343	2554.82	18	0.0262331
3345	2554.87	18	0.0261259
3347	2554.92	18	0.0260974
3349	2554.97	18	0.02619
3351	2555.02	18	0.0261878
3353	2555.07	18	0.0261303
3355	2555.12	18	0.0261031
3357	2555.17	18	0.0261057
3359	2555.22	18	0.0261176
3361	2555.27	18	0.0261057
3363	2555.32	18	0.0260754
3365	2555.37	18	0.0261079
3367	2555.42	18	0.0260658
3369	2555.47	18	0.0261022
3371	2555.52	18	0.026032
3373	2555.57	18	0.0260614
3375	2555.62	18	0.0260184
3377	2555.67	18	0.0260144
3379	2555.72	18	0.0260513
3381	2555.77	18	0.0260689
3383	2555.82	18	0.0260697
3385	2555.87	18	0.0260118
3387	2555.92	18	0.0260197
3389	2555.97	18	0.0259991
3391	2556.02	18	0.0260201
3393	2556.07	18	0.0260403
3395	2556.12	18	0.0260412
3397	2556.17	18	0.0260706
3399	2556.22	18	0.0260272
3401	2556.27	18	0.0260803
3403	2556.32	18	0.0260636
3405	2556.37	18	0.0260552
3407	2556.42	18	0.0260478
3409	2556.47	18	0.026046
3411	2556.52	18	0.0259947
3413	2556.57	18	0.0259802
3415	2556.62	18	0.0259916
3417	2556.67	18	0.0259767
3419	2556.72	18	0.0259187
3421	2556.77	18	0.0259209
3423	2556.82	18	0.0258906
3425	2556.87	18	0.0259499
3427	2556.92	18	0.0259156
3429	2556.97	18	0.0259758
3431	2557.02	18	0.0259521
3433	2557.07	18	0.025971
3435	2557.12	18	0.0259099
3437	2557.17	18	0.0259569
3439	2557.22	18	0.0259358
3441	2557.27	18	0.0259393
3443	2557.32	18	0.02587
3445	2557.37	18	0.0259301
3447	2557.42	18	0.0258884
3449	2557.47	18	0.0259205
3451	2557.52	18	0.025891
3453	2557.57	18	0.0258717
3455	2557.62	18	0.0258963
3457	2557.67	18	0.0259069
3459	2557.72	18	0.0259112
3461	2557.77	18	0.0257848
3463	2557.82	18	0.0258177
3465	2557.87	18	0.0258476
3467	2557.92	18	0.025913
3469	2557.97	18	0.0259139
3471	2558.02	18	0.0258234
3473	2558.07	18	0.0258555
3475	2558.12	18	0.025848
3477	2558.17	18	0.0258327
3479	2558.22	18	0.025834
3481	2558.27	18	0.0258182
3483	2558.32	18	0.025783
3485	2558.37	18	0.0258041
3487	2558.42	18	0.0258713
3489	2558.47	18	0.0258283
3491	2558.52	18	0.0258309
3493	2558.57	18	0.0258493
3495	2558.62	18	0.0258599
3497	2558.67	18	0.0258788
3499	2558.72	18	0.0259648
3501	2558.77	18	0.0258599
3503	2558.82	18	0.0258476
3505	2558.87	18	0.0258217
3507	2558.92	18	0.0258849
3509	2558.97	18	0.0258695
3511	2559.02	18	0.0258331
3513	2559.07	18	0.0258138
3515	2559.12	18	0.0258818
3517	2559.17	18	0.0259508
3519	2559.22	18	0.0259652
3521	2559.27	18	0.0260021
3523	2559.32	18	0.0260399
3525	2559.37	18	0.0260447
3527	2559.42	18	0.0260351
3529	2559.47	18	0.0260118
3531	2559.52	18	0.0260157
3533	2559.57	18	0.0261229
3535	2559.62	18	0.0260667
3537	2559.67	18	0.0260535
3539	2559.72	18	0.0260965
3541	2559.77	18	0.0261145
3543	2559.82	18	0.026082
3545	2559.87	18	0.0260166
3547	2559.92	18	0.0260785
3549	2559.97	18	0.0260702
3551	2560.02	18	0.0260847
3553	2560.07	18	0.0261097
3555	2560.12	18	0.0260882
3557	2560.17	18	0.0260495
3559	2560.22	18	0.0260566
3561	2560.27	18	0.0260465
3563	2560.32	18	0.0260469
3565	2560.37	18	0.0260522
3567	2560.42	18	0.0260034
3569	2560.47	18	0.0260482
3571	2560.52	18	0.0260412
3573	2560.57	18	0.0261523
3575	2560.62	18	0.0260772
3577	2560.67	18	0.0260653
3579	2560.72	18	0.026097
3581	2560.77	18	0.0260482
3583	2560.82	18	0.0260219
3585	2560.87	18	0.0260653
3587	2560.92	18	0.0260065
3589	2560.97	18	0.0260192
3591	2561.02	18	0.026003
3593	2561.07	18	0.0260394
3595	2561.12	18	0.0259613
3597	2561.17	18	0.0259859
3599	2561.22	18	0.0260188
3601	2561.27	18	0.0260552
3603	2561.32	18	0.0259832
3605	2561.37	18	0.025974
3607	2561.42	18	0.0259692
3609	2561.47	18	0.0259551
3611	2561.52	18	0.0259828
3613	2561.57	18	0.025931
3615	2561.62	18	0.0258867
3617	2561.67	18	0.025913
3619	2561.72	18	0.0258783
3621	2561.77	18	0.0258994
3623	2561.82	18	0.0259104
3625	2561.87	18	0.0259573
3627	2561.92	18	0.025963
3629	2561.97	18	0.0259231
3631	2562.02	18	0.0259657
3633	2562.07	18	0.0259797
3635	2562.12	18	0.025992
3637	2562.17	18	0.0259911
3639	2562.22	18	0.0259244
3641	2562.27	18	0.0259336
3643	2562.32	18	0.0259609
3645	2562.37	18	0.0259363
3647	2562.42	18	0.0259191
3649	2562.47	18	0.0259033
3651	2562.52	18	0.025985
3653	2562.57	18	0.0259933
3655	2562.62	18	0.0259903
3657	2562.67	18	0.0258871
3659	2562.72	18	0.0259481
3661	2562.77	18	0.0259639
3663	2562.82	18	0.0259459
3665	2562.87	18	0.0259907
3667	2562.92	18	0.0259995
3669	2562.97	18	0.025971
3671	2563.02	18	0.0260214
3673	2563.07	18	0.0259696
3675	2563.12	18	0.0259108
3677	2563.17	18	0.0259538
3679	2563.22	18	0.025913
3681	2563.27	18	0.0259341
3683	2563.32	18	0.0259169
3685	2563.37	18	0.02587
3687	2563.42	18	0.02592
3689	2563.47	18	0.0259358
3691	2563.52	18	0.0259099
3693	2563.57	18	0.0259301
3695	2563.62	18	0.025963
3697	2563.67	18	0.0259148
3699	2563.72	18	0.0259007
3701	2563.77	18	0.0259306
3703	2563.82	18	0.0259007
3705	2563.87	18	0.0258968
3707	2563.92	18	0.0258941
3709	2563.97	18	0.0258318
3711	2564.02	18	0.0259152
3713	2564.07	18	0.0259095
3715	2564.12	18	0.0259178
3717	2564.17	18	0.0259279
3719	2564.22	18	0.0259345
3721	2564.27	18	0.0259191
3723	2564.32	18	0.0259235
3725	2564.37	18	0.0259692
3727	2564.42	18	0.0259402
3729	2564.47	18	0.0259481
3731	2564.52	18	0.0259806
3733	2564.57	18	0.0259437
3735	2564.62	18	0.0259486
3737	2564.67	18	0.0259705
3739	2564.72	18	0.0259086
3741	2564.77	18	0.0259674
3743	2564.82	18	0.0259468
3745	2564.87	18	0.0259429
3747	2564.92	18	0.0259661
3749	2564.97	18	0.0258989
3751	2565.02	18	0.0258867
3753	2565.07	18	0.0258897
3755	2565.12	18	0.0258546
3757	2565.17	18	0.0259389
3759	2565.22	18	0.0259595
3761	2565.27	18	0.0259407
3763	2565.32	18	0.0259543
3765	2565.37	18	0.0259481
3767	2565.42	18	0.0259508
3769	2565.47	18	0.02596
3771	2565.52	18	0.0259275
3773	2565.57	18	0.0259319
3775	2565.62	18	0.026021
3777	2565.67	18	0.0260175
3779	2565.72	18	0.0259652
3781	2565.77	18	0.0260034
3783	2565.82	18	0.0259999
3785	2565.87	18	0.0260105
3787	2565.92	18	0.0259828
3789	2565.97	18	0.0259828
3791	2566.02	18	0.025989
3793	2566.07	18	0.0259969
3795	2566.12	18	0.0259477
3797	2566.17	18	0.0259402
3799	2566.22	18	0.0259494
3801	2566.27	18	0.0259288
3803	2566.32	18	0.0259332
3805	2566.37	18	0.0259284
3807	2566.42	18	0.0259468
3809	2566.47	18	0.0259683
3811	2566.52	18	0.0259595
3813	2566.57	18	0.0260522
3815	2566.62	18	0.0260759
3817	2566.67	18	0.026075
3819	2566.72	18	0.0261075
3821	2566.77	18	0.0260851
3823	2566.82	18	0.0261593
3825	2566.87	18	0.0261136
3827	2566.92	18	0.0261106
3829	2566.97	18	0.026133
3831	2567.02	18	0.0260978
3833	2567.07	18	0.0261079
3835	2567.12	18	0.0260636
3837	2567.17	18	0.0261057
3839	2567.22	18	0.0260021
3841	2567.27	18	0.0260487
3843	2567.32	18	0.0260495
3845	2567.37	18	0.026021
3847	2567.42	18	0.0260206
3849	2567.47	18	0.0259701
3851	2567.52	18	0.025945
3853	2567.57	18	0.0259991
3855	2567.62	18	0.0259938
3857	2567.67	18	0.0259736
3859	2567.72	18	0.0259819
3861	2567.77	18	0.0260012
3863	2567.82	18	0.0260065
3865	2567.87	18	0.0260074
3867	2567.92	18	0.0259521
3869	2567.97	18	0.0258915
3871	2568.02	18	0.0260535
3873	2568.07	18	0.0260473
3875	2568.12	18	0.0260127
3877	2568.17	18	0.0260408
3879	2568.22	18	0.025992
3881	2568.27	18	0.0259885
3883	2568.32	18	0.0260157
3885	2568.37	18	0.0260091
3887	2568.42	18	0.0259789
3889	2568.47	18	0.0260078
3891	2568.52	18	0.0260307
3893	2568.57	18	0.0260236
3895	2568.62	18	0.0260535
3897	2568.67	18	0.0260364
3899	2568.72	18	0.0260254
3901	2568.77	18	0.0260188
3903	2568.82	18	0.0259868
3905	2568.87	18	0.0260214
3907	2568.92	18	0.025992
3909	2568.97	18	0.0259898
3911	2569.02	18	0.0260368
3913	2569.07	18	0.0259859
3915	2569.12	18	0.0259973
3917	2569.17	18	0.0259758
3919	2569.22	18	0.0259718
3921	2569.27	18	0.0259622
3923	2569.32	18	0.0259705
3925	2569.37	18	0.0259547
3927	2569.42	18	0.0260017
3929	2569.47	18	0.0260074
3931	2569.52	18	0.0259652
3933	2569.57	18	0.0260153
3935	2569.62	18	0.0259723
3937	2569.67	18	0.0260127
3939	2569.72	18	0.0259903
3941	2569.77	18	0.0260272
3943	2569.82	18	0.0260667
3945	2569.87	18	0.0260214
3947	2569.92	18	0.0260245
3949	2569.97	18	0.0260456
3951	2570.02	18	0.026046
3953	2570.07	18	0.0260434
3955	2570.12	18	0.0260153
3957	2570.17	18	0.0260447
3959	2570.22	18	0.0259679
3961	2570.27	18	0.0259609
3963	2570.32	18	0.0260105
3965	2570.37	18	0.0259815
3967	2570.42	18	0.026028
3969	2570.47	18	0.0260416
3971	2570.52	18	0.0259955
3973	2570.57	18	0.0259446
3975	2570.62	18	0.0259977
3977	2570.67	18	0.0259701
3979	2570.72	18	0.0259499
3981	2570.77	18	0.0259573
3983	2570.82	18	0.0259622
3985	2570.87	18	0.0258362
3987	2570.92	18	0.025942
3989	2570.97	18	0.025942
3991	2571.02	18	0.0260162
3993	2571.07	18	0.0260662
3995	2571.12	18	0.0259903
3997	2571.17	18	0.0259775
[truncated: 32,958 more rows]

## Sheet: Mouse 1_Event Trials
2779.218944	Down
2809.47	Down
2932.87	Down
2967.87	Down
3089.77	Down
3120.72	Down
3243.12	Down
3298.12	Down
3420.02	Down
3452.37	Down
3572.92	Down
3573.42	Down
3621.22	Down
3745.02	Down
3777.47	Down
3898.87	Down
3932.22	Down
4053.51	Down
4092.11	Down
4092.21	Down

## Sheet: Mouse 2_415
FrameCounter	Timestamp	Flags	Region0G
2	7227.81	17	0.0325369
4	7227.86	17	0.0322098
6	7227.91	17	0.0338598
8	7227.96	17	0.0336192
10	7228.01	17	0.0335722
12	7228.06	17	0.0335309
14	7228.11	17	0.0334356
16	7228.16	17	0.0333079
18	7228.21	17	0.0332934
20	7228.26	17	0.0332021
22	7228.31	17	0.0331946
24	7228.36	17	0.0331292
26	7228.41	17	0.0330897
28	7228.46	17	0.0330712
30	7228.51	17	0.033051
32	7228.56	17	0.0330286
34	7228.61	17	0.0329206
36	7228.66	17	0.0329048
38	7228.71	17	0.0328311
40	7228.76	17	0.0328794
42	7228.81	17	0.0328469
44	7228.86	17	0.0328574
46	7228.91	17	0.0327692
48	7228.96	17	0.0326822
50	7229.01	17	0.0327292
52	7229.06	17	0.0327507
54	7229.11	17	0.0327555
56	7229.16	17	0.0327103
58	7229.21	17	0.0326998
60	7229.26	17	0.0327266
62	7229.31	17	0.0326546
64	7229.36	17	0.0326361
66	7229.41	17	0.0325742
68	7229.46	17	0.0326612
70	7229.51	17	0.0325856
72	7229.56	17	0.0326019
74	7229.61	17	0.0325782
76	7229.66	17	0.0325084
78	7229.71	17	0.0325953
80	7229.76	17	0.0326511
82	7229.81	17	0.0326972
84	7229.86	17	0.0326844
86	7229.91	17	0.0326691
88	7229.96	17	0.032691
90	7230.01	17	0.0326778
92	7230.06	17	0.0327081
94	7230.11	17	0.0327555
96	7230.16	17	0.0327472
98	7230.21	17	0.0327454
100	7230.26	17	0.0327134
102	7230.31	17	0.0326752
104	7230.36	17	0.0326919
106	7230.41	17	0.0326989
108	7230.46	17	0.032644
110	7230.51	17	0.0326458
112	7230.56	17	0.0326642
114	7230.61	17	0.0325949
116	7230.66	17	0.0326822
118	7230.71	17	0.0326743
120	7230.76	17	0.0325992
122	7230.81	17	0.032648
124	7230.86	17	0.0325725
126	7230.91	17	0.0326019
128	7230.96	17	0.032637
130	7231.01	17	0.0326107
132	7231.06	17	0.0325966
134	7231.11	17	0.0326317
136	7231.16	17	0.0326401
138	7231.21	17	0.0326133
140	7231.26	17	0.0326194
142	7231.31	17	0.032529
144	7231.36	17	0.0324851
146	7231.41	17	0.0324491
148	7231.46	17	0.0323262
150	7231.51	17	0.0322081
152	7231.56	17	0.032046
154	7231.61	17	0.0318976
156	7231.66	17	0.0319271
158	7231.71	17	0.0317677
160	7231.76	17	0.0316083
162	7231.81	17	0.0315389
164	7231.86	17	0.0316145
166	7231.91	17	0.0315908
168	7231.96	17	0.0317277
170	7232.01	17	0.0316759
172	7232.06	17	0.0316992
174	7232.11	17	0.0316957
176	7232.16	17	0.0316724
178	7232.21	17	0.0316513
180	7232.26	17	0.0316606
182	7232.31	17	0.0316781
184	7232.36	17	0.0316654
186	7232.41	17	0.0316597
188	7232.46	17	0.0316733
190	7232.51	17	0.0316922
192	7232.56	17	0.0316474
194	7232.61	17	0.0316794
196	7232.66	17	0.0319626
198	7232.71	17	0.0320724
200	7232.76	17	0.0320904
202	7232.81	17	0.0320267
204	7232.86	17	0.0320197
206	7232.91	17	0.0319306
208	7232.96	17	0.0318054
210	7233.01	17	0.0315807
212	7233.06	17	0.031528
214	7233.11	17	0.0316755
216	7233.16	17	0.0315833
218	7233.21	17	0.0314617
220	7233.26	17	0.0314542
222	7233.31	17	0.0314239
224	7233.36	17	0.0314819
226	7233.41	17	0.0313862
228	7233.46	17	0.0313734
230	7233.51	17	0.0312891
232	7233.56	17	0.0312307
234	7233.61	17	0.0313128
236	7233.66	17	0.0315188
238	7233.71	17	0.0316803
240	7233.76	17	0.0317444
242	7233.81	17	0.0318112
244	7233.86	17	0.0318731
246	7233.91	17	0.0320188
248	7233.96	17	0.0319758
250	7234.01	17	0.0321123
252	7234.06	17	0.0320504
254	7234.11	17	0.0320856
256	7234.16	17	0.032093
258	7234.21	17	0.0321532
260	7234.26	17	0.0321786
262	7234.31	17	0.0321115
264	7234.36	17	0.0320496
266	7234.41	17	0.032043
268	7234.46	17	0.0320232
270	7234.51	17	0.032129
272	7234.56	17	0.032086
274	7234.61	17	0.0320096
276	7234.66	17	0.0320035
278	7234.71	17	0.03205
280	7234.76	17	0.0319938
282	7234.81	17	0.0319824
284	7234.86	17	0.0319468
286	7234.91	17	0.0320548
288	7234.96	17	0.0321356
290	7235.01	17	0.0321457
292	7235.06	17	0.0321036
294	7235.11	17	0.0321347
296	7235.16	17	0.0321009
298	7235.21	17	0.0321382
300	7235.26	17	0.0321554
302	7235.31	17	0.032126
304	7235.36	17	0.0321185
306	7235.41	17	0.032144
308	7235.46	17	0.0321202
310	7235.51	17	0.0321242
312	7235.56	17	0.0321251
314	7235.61	17	0.0321751
316	7235.66	17	0.0321769
318	7235.71	17	0.0322278
320	7235.76	17	0.0321769
322	7235.81	17	0.0321418
324	7235.86	17	0.0322138
326	7235.91	17	0.0322006
328	7235.96	17	0.0321958
330	7236.01	17	0.0321786
332	7236.06	17	0.0320149
334	7236.11	17	0.032086
336	7236.16	17	0.0320355
338	7236.21	17	0.0320733
340	7236.26	17	0.0321137
342	7236.31	17	0.0320891
344	7236.36	17	0.0320834
346	7236.41	17	0.0320184
348	7236.46	17	0.031989
350	7236.51	17	0.0319793
352	7236.56	17	0.0319534
354	7236.61	17	0.0320206
356	7236.66	17	0.0318941
358	7236.71	17	0.0319104
360	7236.76	17	0.0319152
362	7236.81	17	0.0319148
364	7236.86	17	0.0318204
366	7236.91	17	0.0318994
368	7236.96	17	0.0318292
370	7237.01	17	0.0318489
372	7237.06	17	0.0317901
374	7237.11	17	0.0318353
376	7237.16	17	0.0318537
378	7237.21	17	0.0318849
380	7237.26	17	0.0319293
382	7237.31	17	0.0319424
384	7237.36	17	0.031877
386	7237.41	17	0.0319117
388	7237.46	17	0.0318963
390	7237.51	17	0.0319411
392	7237.56	17	0.0319323
394	7237.61	17	0.0319512
396	7237.66	17	0.0319639
398	7237.71	17	0.031931
400	7237.76	17	0.0319082
402	7237.81	17	0.0319964
404	7237.86	17	0.0319613
406	7237.91	17	0.0320131
408	7237.96	17	0.0320193
410	7238.01	17	0.0320184
412	7238.06	17	0.03201
414	7238.11	17	0.0320667
416	7238.16	17	0.0319802
418	7238.21	17	0.0319354
420	7238.26	17	0.0318783
422	7238.31	17	0.0316983
424	7238.36	17	0.0314353
426	7238.41	17	0.0314924
428	7238.46	17	0.0316276
430	7238.51	17	0.0315991
432	7238.56	17	0.0316237
434	7238.61	17	0.0315868
436	7238.66	17	0.0316834
438	7238.71	17	0.0317791
440	7238.76	17	0.0319227
442	7238.81	17	0.0318625
444	7238.86	17	0.0318252
446	7238.91	17	0.0318744
448	7238.96	17	0.0318155
450	7239.01	17	0.0317471
452	7239.06	17	0.0316439
454	7239.11	17	0.0317084
456	7239.16	17	0.031823
458	7239.21	17	0.0317242
460	7239.26	17	0.0317918
462	7239.31	17	0.031827
464	7239.36	17	0.0317984
466	7239.41	17	0.031805
468	7239.46	17	0.0318415
470	7239.51	17	0.0318652
472	7239.56	17	0.0318854
474	7239.61	17	0.031942
476	7239.66	17	0.0318586
478	7239.71	17	0.0319227
480	7239.76	17	0.0318968
482	7239.81	17	0.0319244
484	7239.86	17	0.0319236
486	7239.91	17	0.0318876
488	7239.96	17	0.0319394
490	7240.01	17	0.0318963
492	7240.06	17	0.0318419
494	7240.11	17	0.0317523
496	7240.16	17	0.0317514
498	7240.21	17	0.0317462
500	7240.26	17	0.0318476
502	7240.31	17	0.0318041
504	7240.36	17	0.0317646
506	7240.41	17	0.0317804
508	7240.46	17	0.0317782
510	7240.51	17	0.0318432
512	7240.56	17	0.0318072
514	7240.61	17	0.0318371
516	7240.66	17	0.0317185
518	7240.71	17	0.0316799
520	7240.76	17	0.0316707
522	7240.81	17	0.031715
524	7240.86	17	0.0317914
526	7240.91	17	0.0317514
528	7240.96	17	0.0317062
530	7241.01	17	0.0316852
532	7241.06	17	0.0316838
534	7241.11	17	0.0314744
536	7241.16	17	0.0310332
538	7241.21	17	0.0310968
540	7241.26	17	0.0313677
542	7241.31	17	0.0316307
544	7241.36	17	0.0316035
546	7241.41	17	0.0317479
548	7241.46	17	0.0318937
550	7241.51	17	0.0317453
552	7241.56	17	0.0317967
554	7241.61	17	0.0318138
556	7241.66	17	0.0318753
558	7241.71	17	0.0319745
560	7241.76	17	0.0318015
562	7241.81	17	0.0318445
564	7241.86	17	0.0317774
566	7241.91	17	0.0318621
568	7241.96	17	0.0320008
570	7242.01	17	0.0319552
572	7242.06	17	0.0319508
574	7242.11	17	0.0318955
576	7242.16	17	0.0318327
578	7242.21	17	0.0318454
580	7242.26	17	0.0318309
582	7242.31	17	0.0317831
584	7242.36	17	0.0317795
586	7242.41	17	0.0317124
588	7242.46	17	0.0317563
590	7242.51	17	0.0317225
592	7242.56	17	0.0317212
594	7242.61	17	0.0317032
596	7242.66	17	0.0317203
598	7242.71	17	0.0316922
600	7242.76	17	0.0316685
602	7242.81	17	0.0316382
604	7242.86	17	0.0316535
606	7242.91	17	0.0316478
608	7242.96	17	0.0316588
610	7243.01	17	0.0316772
612	7243.06	17	0.0317163
614	7243.11	17	0.0317089
616	7243.16	17	0.0316544
618	7243.21	17	0.0317282
620	7243.26	17	0.0316913
622	7243.31	17	0.0317027
624	7243.36	17	0.031719
626	7243.41	17	0.0317343
628	7243.46	17	0.0318081
630	7243.51	17	0.0317769
632	7243.56	17	0.0317804
634	7243.61	17	0.0317734
636	7243.66	17	0.0317611
638	7243.71	17	0.0317879
640	7243.76	17	0.0317848
642	7243.81	17	0.0318858
644	7243.86	17	0.0318717
646	7243.91	17	0.0318515
648	7243.96	17	0.031906
650	7244.01	17	0.0318586
652	7244.06	17	0.031924
654	7244.11	17	0.0318832
656	7244.16	17	0.0318845
658	7244.21	17	0.0318849
660	7244.26	17	0.0318393
662	7244.31	17	0.0318318
664	7244.36	17	0.031845
666	7244.41	17	0.0318098
668	7244.46	17	0.0318994
670	7244.51	17	0.0318682
672	7244.56	17	0.0319337
674	7244.61	17	0.0319337
676	7244.66	17	0.0319126
678	7244.71	17	0.0318054
680	7244.76	17	0.0318191
682	7244.81	17	0.0318832
684	7244.86	17	0.0318243
686	7244.91	17	0.031881
688	7244.96	17	0.0318616
690	7245.01	17	0.0318722
692	7245.06	17	0.0319543
694	7245.11	17	0.0318463
696	7245.16	17	0.0319275
698	7245.21	17	0.0319012
700	7245.26	17	0.0319126
702	7245.31	17	0.0319069
704	7245.36	17	0.0318467
706	7245.41	17	0.0318955
708	7245.46	17	0.0318226
710	7245.51	17	0.0317716
712	7245.56	17	0.0317295
714	7245.61	17	0.0317304
716	7245.66	17	0.0317651
718	7245.71	17	0.0317589
720	7245.76	17	0.0318362
722	7245.81	17	0.0317563
724	7245.86	17	0.0317018
726	7245.91	17	0.031769
728	7245.96	17	0.0317242
730	7246.01	17	0.0317269
732	7246.06	17	0.031715
734	7246.11	17	0.0317348
736	7246.16	17	0.0317431
738	7246.21	17	0.031737
740	7246.26	17	0.031708
742	7246.31	17	0.0317185
744	7246.36	17	0.0316333
746	7246.41	17	0.031578
748	7246.46	17	0.0315771
750	7246.51	17	0.0316118
752	7246.56	17	0.0315815
754	7246.61	17	0.0315288
756	7246.66	17	0.0314639
758	7246.71	17	0.031434
760	7246.76	17	0.0314634
762	7246.81	17	0.0313932
764	7246.86	17	0.0313901
766	7246.91	17	0.0314696
768	7246.96	17	0.0313927
770	7247.01	17	0.0314823
772	7247.06	17	0.0314397
774	7247.11	17	0.0315082
776	7247.16	17	0.0314665
778	7247.21	17	0.0315108
780	7247.26	17	0.0315104
782	7247.31	17	0.0314586
784	7247.36	17	0.0315188
786	7247.41	17	0.0315719
788	7247.46	17	0.0315122
790	7247.51	17	0.0314871
792	7247.56	17	0.0315324
794	7247.61	17	0.0314797
796	7247.66	17	0.0314924
798	7247.71	17	0.0314977
800	7247.76	17	0.0315363
802	7247.81	17	0.0314907
804	7247.86	17	0.0314981
806	7247.91	17	0.0314402
808	7247.96	17	0.0314731
810	7248.01	17	0.0314314
812	7248.06	17	0.0314639
814	7248.11	17	0.0313971
816	7248.16	17	0.0314213
818	7248.21	17	0.0314024
820	7248.26	17	0.0313897
822	7248.31	17	0.031402
824	7248.36	17	0.0313655
826	7248.41	17	0.0314529
828	7248.46	17	0.0313774
830	7248.51	17	0.0313286
832	7248.56	17	0.0313335
834	7248.61	17	0.0313611
836	7248.66	17	0.0313067
838	7248.71	17	0.031319
840	7248.76	17	0.0314283
842	7248.81	17	0.0313963
844	7248.86	17	0.0313458
846	7248.91	17	0.031402
848	7248.96	17	0.0314555
850	7249.01	17	0.0314849
852	7249.06	17	0.0314551
854	7249.11	17	0.0314345
856	7249.16	17	0.031492
858	7249.21	17	0.0314086
860	7249.26	17	0.0315152
862	7249.31	17	0.0314849
864	7249.36	17	0.0314006
866	7249.41	17	0.0313625
868	7249.46	17	0.0314077
870	7249.51	17	0.0314024
872	7249.56	17	0.031398
874	7249.61	17	0.0313818
876	7249.66	17	0.031387
878	7249.71	17	0.0313739
880	7249.76	17	0.031405
882	7249.81	17	0.0314314
884	7249.86	17	0.0314525
886	7249.91	17	0.0314257
888	7249.96	17	0.0314538
890	7250.01	17	0.031409
892	7250.06	17	0.0314582
894	7250.11	17	0.0313269
896	7250.16	17	0.0312369
898	7250.21	17	0.0312452
900	7250.26	17	0.0312004
902	7250.31	17	0.0311267
904	7250.36	17	0.0311381
906	7250.41	17	0.0310103
908	7250.46	17	0.0310261
910	7250.51	17	0.03098
912	7250.56	17	0.0309972
914	7250.61	17	0.0310222
916	7250.66	17	0.0310494
918	7250.71	17	0.0310665
920	7250.76	17	0.0311104
922	7250.81	17	0.0309581
924	7250.86	17	0.0309383
926	7250.91	17	0.0309511
928	7250.96	17	0.0309493
930	7251.01	17	0.0310696
932	7251.06	17	0.0310959
934	7251.11	17	0.0310929
936	7251.16	17	0.0311179
938	7251.21	17	0.0311201
940	7251.26	17	0.0311895
942	7251.31	17	0.0311087
944	7251.36	17	0.031247
946	7251.41	17	0.0311895
948	7251.46	17	0.0311565
950	7251.51	17	0.0312141
952	7251.56	17	0.0313124
954	7251.61	17	0.0312931
956	7251.66	17	0.0312645
958	7251.71	17	0.031272
960	7251.76	17	0.0312602
962	7251.81	17	0.0312773
964	7251.86	17	0.0311987
966	7251.91	17	0.0311552
968	7251.96	17	0.0311451
970	7252.01	17	0.0311508
972	7252.06	17	0.0311473
974	7252.11	17	0.0312057
976	7252.16	17	0.031204
978	7252.21	17	0.0312171
980	7252.26	17	0.0311693
982	7252.31	17	0.0311508
984	7252.36	17	0.031207
986	7252.41	17	0.0311873
988	7252.46	17	0.0311535
990	7252.51	17	0.0312198
992	7252.56	17	0.0311838
994	7252.61	17	0.0312509
996	7252.66	17	0.0312154
998	7252.71	17	0.0311956
1000	7252.76	17	0.0312136
1002	7252.81	17	0.0311701
1004	7252.86	17	0.0312206
1006	7252.91	17	0.0312272
1008	7252.96	17	0.0311561
1010	7253.01	17	0.0310771
1012	7253.06	17	0.0310955
1014	7253.11	17	0.0311298
1016	7253.16	17	0.0312694
1018	7253.21	17	0.0311157
1020	7253.26	17	0.0312356
1022	7253.31	17	0.0313234
1024	7253.36	17	0.0313458
1026	7253.41	17	0.0313344
1028	7253.46	17	0.0313831
1030	7253.51	17	0.0313537
1032	7253.56	17	0.0314006
1034	7253.61	17	0.0313888
1036	7253.66	17	0.0312953
1038	7253.71	17	0.0313128
1040	7253.76	17	0.0312413
1042	7253.81	17	0.0312948
1044	7253.86	17	0.0312325
1046	7253.91	17	0.0312746
1048	7253.96	17	0.0312869
1050	7254.01	17	0.0312294
1052	7254.06	17	0.0312891
1054	7254.11	17	0.0312119
1056	7254.16	17	0.0312505
1058	7254.21	17	0.0312593
1060	7254.26	17	0.0312035
1062	7254.31	17	0.0312479
1064	7254.36	17	0.0312593
1066	7254.41	17	0.0312558
1068	7254.46	17	0.0312105
1070	7254.51	17	0.0312825
1072	7254.56	17	0.0311961
1074	7254.61	17	0.0312176
1076	7254.66	17	0.0310736
1078	7254.71	17	0.0310652
1080	7254.76	17	0.0310793
1082	7254.81	17	0.0311425
1084	7254.86	17	0.0311381
1086	7254.91	17	0.0311846
1088	7254.96	17	0.0311789
1090	7255.01	17	0.0311961
1092	7255.06	17	0.0311701
1094	7255.11	17	0.031106
1096	7255.16	17	0.0311333
1098	7255.21	17	0.0312057
1100	7255.26	17	0.0312013
1102	7255.31	17	0.0311723
1104	7255.36	17	0.031132
1106	7255.41	17	0.031193
1108	7255.46	17	0.0312329
1110	7255.51	17	0.0311912
1112	7255.56	17	0.0310968
1114	7255.61	17	0.0311311
1116	7255.66	17	0.0312825
1118	7255.71	17	0.0312628
1120	7255.76	17	0.031128
1122	7255.81	17	0.0311267
1124	7255.86	17	0.0313155
1126	7255.91	17	0.0312501
1128	7255.96	17	0.0311934
1130	7256.01	17	0.0311267
1132	7256.06	17	0.0312843
1134	7256.11	17	0.0312825
1136	7256.16	17	0.0312356
1138	7256.21	17	0.0310845
1140	7256.26	17	0.0311851
1142	7256.31	17	0.0312114
1144	7256.36	17	0.0312242
1146	7256.41	17	0.0311592
1148	7256.46	17	0.0311284
1150	7256.51	17	0.0311179
1152	7256.56	17	0.0311179
1154	7256.61	17	0.0310898
1156	7256.66	17	0.0310933
1158	7256.71	17	0.0310292
1160	7256.76	17	0.031002
1162	7256.81	17	0.0310981
1164	7256.86	17	0.0310477
1166	7256.91	17	0.0310498
1168	7256.96	17	0.0310455
1170	7257.01	17	0.0310525
1172	7257.06	17	0.0310938
1174	7257.11	17	0.0309445
1176	7257.16	17	0.0308874
1178	7257.21	17	0.0308352
1180	7257.26	17	0.0307913
1182	7257.31	17	0.0307469
1184	7257.36	17	0.0307487
1186	7257.41	17	0.0307056
1188	7257.46	17	0.0306165
1190	7257.51	17	0.0306314
1192	7257.56	17	0.0305708
1194	7257.61	17	0.0305133
1196	7257.66	17	0.0305998
1198	7257.71	17	0.0304734
1200	7257.76	17	0.0304822
1202	7257.81	17	0.0305015
1204	7257.86	17	0.0303083
1206	7257.91	17	0.0302969
1208	7257.96	17	0.0303118
1210	7258.01	17	0.0301704
1212	7258.06	17	0.0301832
1214	7258.11	17	0.030224
1216	7258.16	17	0.0302631
1218	7258.21	17	0.03021
1220	7258.26	17	0.0303974
1222	7258.31	17	0.0303215
1224	7258.36	17	0.0304036
1226	7258.41	17	0.0304817
1228	7258.46	17	0.0306262
1230	7258.51	17	0.0307096
1232	7258.56	17	0.0307021
1234	7258.61	17	0.0308554
1236	7258.66	17	0.0307939
1238	7258.71	17	0.030847
1240	7258.76	17	0.0308637
1242	7258.81	17	0.0307794
1244	7258.86	17	0.0307781
1246	7258.91	17	0.03071
1248	7258.96	17	0.0306674
1250	7259.01	17	0.0307026
1252	7259.06	17	0.0303755
1254	7259.11	17	0.0303961
1256	7259.16	17	0.0304694
1258	7259.21	17	0.030429
1260	7259.26	17	0.0303061
1262	7259.31	17	0.0302561
1264	7259.36	17	0.0301156
1266	7259.41	17	0.0301507
1268	7259.46	17	0.0299667
1270	7259.51	17	0.0299483
1272	7259.56	17	0.029968
1274	7259.61	17	0.0300308
1276	7259.66	17	0.030199
1278	7259.71	17	0.0300392
1280	7259.76	17	0.0300405
1282	7259.81	17	0.0300277
1284	7259.86	17	0.0300853
1286	7259.91	17	0.030145
1288	7259.96	17	0.0302262
1290	7260.01	17	0.0302183
1292	7260.06	17	0.0302543
1294	7260.11	17	0.0303772
1296	7260.16	17	0.0304769
1298	7260.21	17	0.0306297
1300	7260.26	17	0.030678
1302	7260.31	17	0.030703
1304	7260.36	17	0.0307838
1306	7260.41	17	0.0307891
1308	7260.46	17	0.0307934
1310	7260.51	17	0.0308347
1312	7260.56	17	0.0308584
1314	7260.61	17	0.0308589
1316	7260.66	17	0.0308409
1318	7260.71	17	0.0308909
1320	7260.76	17	0.030833
1322	7260.81	17	0.0309331
1324	7260.86	17	0.0308654
1326	7260.91	17	0.0309664
1328	7260.96	17	0.0308975
1330	7261.01	17	0.0308501
1332	7261.06	17	0.0309963
1334	7261.11	17	0.0309497
1336	7261.16	17	0.0308944
1338	7261.21	17	0.0309546
1340	7261.26	17	0.0309322
1342	7261.31	17	0.0309445
1344	7261.36	17	0.0309576
1346	7261.41	17	0.0308514
1348	7261.46	17	0.030883
1350	7261.51	17	0.0308518
1352	7261.56	17	0.0307592
1354	7261.61	17	0.0307171
1356	7261.66	17	0.0306516
1358	7261.71	17	0.0306481
1360	7261.76	17	0.0307307
1362	7261.81	17	0.0306578
1364	7261.86	17	0.030602
1366	7261.91	17	0.0307408
1368	7261.96	17	0.0306538
1370	7262.01	17	0.0307697
1372	7262.06	17	0.0307315
1374	7262.11	17	0.0307276
1376	7262.16	17	0.0306644
1378	7262.21	17	0.0306885
1380	7262.26	17	0.0307201
1382	7262.31	17	0.0307302
1384	7262.36	17	0.0307416
1386	7262.41	17	0.0307491
1388	7262.46	17	0.0307276
1390	7262.51	17	0.0306218
1392	7262.56	17	0.0305168
1394	7262.61	17	0.030577
1396	7262.66	17	0.0305616
1398	7262.71	17	0.0305397
1400	7262.76	17	0.0306275
1402	7262.81	17	0.0305836
1404	7262.86	17	0.0305533
1406	7262.91	17	0.0305612
1408	7262.96	17	0.030548
1410	7263.01	17	0.0305243
1412	7263.06	17	0.0303996
1414	7263.11	17	0.0302885
1416	7263.16	17	0.0303869
1418	7263.21	17	0.0302187
1420	7263.26	17	0.030307
1422	7263.31	17	0.0302367
1424	7263.36	17	0.0302266
1426	7263.41	17	0.0302569
1428	7263.46	17	0.0303878
1430	7263.51	17	0.0304216
1432	7263.56	17	0.0304321
1434	7263.61	17	0.0303711
1436	7263.66	17	0.0304769
1438	7263.71	17	0.0304997
1440	7263.76	17	0.0305445
1442	7263.81	17	0.0306042
1444	7263.86	17	0.0306556
1446	7263.91	17	0.0306345
1448	7263.96	17	0.0306025
1450	7264.01	17	0.0306371
1452	7264.06	17	0.0306191
1454	7264.11	17	0.0306859
1456	7264.16	17	0.030678
1458	7264.21	17	0.0306213
1460	7264.26	17	0.03071
1462	7264.31	17	0.0306262
1464	7264.36	17	0.0307039
1466	7264.41	17	0.0306556
1468	7264.46	17	0.0305287
1470	7264.51	17	0.0306099
1472	7264.56	17	0.0305634
1474	7264.61	17	0.0305155
1476	7264.66	17	0.0306112
1478	7264.71	17	0.0305467
1480	7264.76	17	0.0305414
1482	7264.81	17	0.0306042
1484	7264.86	17	0.030548
1486	7264.91	17	0.0305647
1488	7264.96	17	0.030595
1490	7265.01	17	0.0306745
1492	7265.06	17	0.0305788
1494	7265.11	17	0.0305234
1496	7265.16	17	0.0302253
1498	7265.21	17	0.0301735
1500	7265.26	17	0.0300809
1502	7265.31	17	0.0300923
1504	7265.36	17	0.0300756
1506	7265.41	17	0.0299891
1508	7265.46	17	0.0299737
1510	7265.51	17	0.029925
1512	7265.56	17	0.0298758
1514	7265.61	17	0.0299017
1516	7265.66	17	0.0300018
1518	7265.71	17	0.0300901
1520	7265.76	17	0.0300848
1522	7265.81	17	0.0299448
1524	7265.86	17	0.0299456
1526	7265.91	17	0.0300343
1528	7265.96	17	0.0300883
1530	7266.01	17	0.030019
1532	7266.06	17	0.0304356
1534	7266.11	17	0.0305691
1536	7266.16	17	0.0305845
1538	7266.21	17	0.0306139
1540	7266.26	17	0.0305449
1542	7266.31	17	0.0305976
1544	7266.36	17	0.030653
1546	7266.41	17	0.0307219
1548	7266.46	17	0.030609
1550	7266.51	17	0.0306429
1552	7266.56	17	0.0306819
1554	7266.61	17	0.0307412
1556	7266.66	17	0.030725
1558	7266.71	17	0.0306503
1560	7266.76	17	0.0306688
1562	7266.81	17	0.0306152
1564	7266.86	17	0.0305906
1566	7266.91	17	0.030721
1568	7266.96	17	0.0306516
1570	7267.01	17	0.0305902
1572	7267.06	17	0.030631
1574	7267.11	17	0.0306161
1576	7267.16	17	0.030645
1578	7267.21	17	0.0306551
1580	7267.26	17	0.0307632
1582	7267.31	17	0.0306705
1584	7267.36	17	0.0306569
1586	7267.41	17	0.0307017
1588	7267.46	17	0.030685
1590	7267.51	17	0.0306398
1592	7267.56	17	0.0306789
1594	7267.61	17	0.0307096
1596	7267.66	17	0.0306477
1598	7267.71	17	0.0307992
1600	7267.76	17	0.0307113
1602	7267.81	17	0.0307711
1604	7267.86	17	0.0307004
1606	7267.91	17	0.0306679
1608	7267.96	17	0.0307746
1610	7268.01	17	0.0307671
1612	7268.06	17	0.0307583
1614	7268.11	17	0.030714
1616	7268.16	17	0.0307298
1618	7268.21	17	0.030714
1620	7268.26	17	0.0306771
1622	7268.31	17	0.0306854
1624	7268.36	17	0.0306753
1626	7268.41	17	0.0307456
1628	7268.46	17	0.0307127
1630	7268.51	17	0.0306907
1632	7268.56	17	0.030725
1634	7268.61	17	0.0306846
1636	7268.66	17	0.0307618
1638	7268.71	17	0.0306797
1640	7268.76	17	0.0307653
1642	7268.81	17	0.0308813
1644	7268.86	17	0.0308558
1646	7268.91	17	0.030847
1648	7268.96	17	0.0308769
1650	7269.01	17	0.0307732
1652	7269.06	17	0.0309054
1654	7269.11	17	0.0308343
1656	7269.16	17	0.0308615
1658	7269.21	17	0.0308163
1660	7269.26	17	0.0307579
1662	7269.31	17	0.0307715
1664	7269.36	17	0.0307759
1666	7269.41	17	0.0307469
1668	7269.46	17	0.0307065
1670	7269.51	17	0.0307561
1672	7269.56	17	0.0307456
1674	7269.61	17	0.0307816
1676	7269.66	17	0.0306973
1678	7269.71	17	0.0307333
1680	7269.76	17	0.0306824
1682	7269.81	17	0.0306688
1684	7269.86	17	0.0306973
1686	7269.91	17	0.0306231
1688	7269.96	17	0.0305673
1690	7270.01	17	0.0306121
1692	7270.06	17	0.0305467
1694	7270.11	17	0.0305586
1696	7270.16	17	0.0305687
1698	7270.21	17	0.0305125
1700	7270.26	17	0.0304633
1702	7270.31	17	0.0305621
1704	7270.36	17	0.0304071
1706	7270.41	17	0.0303465
1708	7270.46	17	0.0302547
1710	7270.51	17	0.0301463
1712	7270.56	17	0.0298811
1714	7270.61	17	0.0295654
1716	7270.66	17	0.0295935
1718	7270.71	17	0.0295496
1720	7270.76	17	0.0296269
1722	7270.81	17	0.0296194
1724	7270.86	17	0.029684
1726	7270.91	17	0.0297424
1728	7270.96	17	0.0297648
1730	7271.01	17	0.0298811
1732	7271.06	17	0.0299136
1734	7271.11	17	0.0300471
1736	7271.16	17	0.030145
1738	7271.21	17	0.0302249
1740	7271.26	17	0.0302477
1742	7271.31	17	0.0302108
1744	7271.36	17	0.0299553
1746	7271.41	17	0.0297059
1748	7271.46	17	0.029716
1750	7271.51	17	0.0297226
1752	7271.56	17	0.0296572
1754	7271.61	17	0.0296449
1756	7271.66	17	0.0297011
1758	7271.71	17	0.0299202
1760	7271.76	17	0.0301217
1762	7271.81	17	0.0302938
1764	7271.86	17	0.0303693
1766	7271.91	17	0.0303908
1768	7271.96	17	0.0303939
1770	7272.01	17	0.0303654
1772	7272.06	17	0.0304203
1774	7272.11	17	0.0303895
1776	7272.16	17	0.0303131
1778	7272.21	17	0.0305467
1780	7272.26	17	0.030577
1782	7272.31	17	0.0304672
1784	7272.36	17	0.0304242
1786	7272.41	17	0.0304097
1788	7272.46	17	0.0304317
1790	7272.51	17	0.0305129
1792	7272.56	17	0.0304817
1794	7272.61	17	0.030487
1796	7272.66	17	0.0305853
1798	7272.71	17	0.0305032
1800	7272.76	17	0.0305656
1802	7272.81	17	0.030591
1804	7272.86	17	0.0306253
1806	7272.91	17	0.0306244
1808	7272.96	17	0.0305972
1810	7273.01	17	0.0305348
1812	7273.06	17	0.0306446
1814	7273.11	17	0.0307109
1816	7273.16	17	0.0307004
1818	7273.21	17	0.0307241
1820	7273.26	17	0.0305985
1822	7273.31	17	0.0305669
1824	7273.36	17	0.0306863
1826	7273.41	17	0.0307241
1828	7273.46	17	0.0307078
1830	7273.51	17	0.0306446
1832	7273.56	17	0.0306731
1834	7273.61	17	0.0306582
1836	7273.66	17	0.0306174
1838	7273.71	17	0.0306626
1840	7273.76	17	0.0306134
1842	7273.81	17	0.0306411
1844	7273.86	17	0.030602
1846	7273.91	17	0.0306284
1848	7273.96	17	0.0305428
1850	7274.01	17	0.030584
1852	7274.06	17	0.0306104
1854	7274.11	17	0.0305125
1856	7274.16	17	0.030624
1858	7274.21	17	0.0305862
1860	7274.26	17	0.0306029
1862	7274.31	17	0.0306336
1864	7274.36	17	0.0306635
1866	7274.41	17	0.0307443
1868	7274.46	17	0.0308461
1870	7274.51	17	0.0307965
1872	7274.56	17	0.0307135
1874	7274.61	17	0.0306828
1876	7274.66	17	0.0306367
1878	7274.71	17	0.0306512
1880	7274.76	17	0.0306227
1882	7274.81	17	0.0307162
1884	7274.86	17	0.0307254
1886	7274.91	17	0.0306674
1888	7274.96	17	0.0306797
1890	7275.01	17	0.0306622
1892	7275.06	17	0.0306609
1894	7275.11	17	0.0306213
1896	7275.16	17	0.0306205
1898	7275.21	17	0.0305871
1900	7275.26	17	0.0305414
1902	7275.31	17	0.0306218
1904	7275.36	17	0.030689
1906	7275.41	17	0.0306587
1908	7275.46	17	0.030645
1910	7275.51	17	0.0306819
1912	7275.56	17	0.0305708
1914	7275.61	17	0.0306402
1916	7275.66	17	0.0306169
1918	7275.71	17	0.0306121
1920	7275.76	17	0.0306626
1922	7275.81	17	0.0306174
1924	7275.86	17	0.030681
1926	7275.91	17	0.0306604
1928	7275.96	17	0.0306187
1930	7276.01	17	0.0306793
1932	7276.06	17	0.030631
1934	7276.11	17	0.0306639
1936	7276.16	17	0.0306674
1938	7276.21	17	0.0306279
1940	7276.26	17	0.0306841
1942	7276.31	17	0.0306859
1944	7276.36	17	0.0307184
1946	7276.41	17	0.0307364
1948	7276.46	17	0.0307026
1950	7276.51	17	0.0306363
1952	7276.56	17	0.0307236
1954	7276.61	17	0.0307298
1956	7276.66	17	0.030685
1958	7276.71	17	0.030707
1960	7276.76	17	0.0306828
1962	7276.81	17	0.0306626
1964	7276.86	17	0.0306178
1966	7276.91	17	0.0306209
1968	7276.96	17	0.0306648
1970	7277.01	17	0.0306543
1972	7277.06	17	0.0306933
1974	7277.11	17	0.030685
1976	7277.16	17	0.0306442
1978	7277.21	17	0.0307039
1980	7277.26	17	0.0307052
1982	7277.31	17	0.0306161
1984	7277.36	17	0.0306257
1986	7277.41	17	0.0306868
1988	7277.46	17	0.0306749
1990	7277.51	17	0.0307052
1992	7277.56	17	0.0306749
1994	7277.61	17	0.030681
1996	7277.66	17	0.0307034
1998	7277.71	17	0.0307329
2000	7277.76	17	0.0307368
2002	7277.81	17	0.0306573
2004	7277.86	17	0.0306393
2006	7277.91	17	0.0306534
2008	7277.96	17	0.0307149
2010	7278.01	17	0.0306613
2012	7278.06	17	0.0307228
2014	7278.11	17	0.0306385
2016	7278.16	17	0.0306841
2018	7278.21	17	0.030678
2020	7278.26	17	0.0306508
2022	7278.31	17	0.0307192
2024	7278.36	17	0.0307109
2026	7278.41	17	0.0306969
2028	7278.46	17	0.0306907
2030	7278.51	17	0.030671
2032	7278.56	17	0.0306749
2034	7278.61	17	0.0306508
2036	7278.66	17	0.0306358
2038	7278.71	17	0.030685
2040	7278.76	17	0.0307122
2042	7278.81	17	0.0306973
2044	7278.86	17	0.0306872
2046	7278.91	17	0.0306569
2048	7278.96	17	0.0306556
2050	7279.01	17	0.030642
2052	7279.06	17	0.0306516
2054	7279.11	17	0.0306789
2056	7279.16	17	0.0306016
2058	7279.21	17	0.0306622
2060	7279.26	17	0.0306609
2062	7279.31	17	0.0306503
2064	7279.36	17	0.0306727
2066	7279.41	17	0.0306306
2068	7279.46	17	0.030663
2070	7279.51	17	0.030667
2072	7279.56	17	0.0306793
2074	7279.61	17	0.0306393
2076	7279.66	17	0.030649
2078	7279.71	17	0.0306925
2080	7279.76	17	0.0306894
2082	7279.81	17	0.0305875
2084	7279.86	17	0.0306657
2086	7279.91	17	0.0306345
2088	7279.96	17	0.0306336
2090	7280.01	17	0.0306314
2092	7280.06	17	0.0306486
2094	7280.11	17	0.0306784
2096	7280.16	17	0.0307105
2098	7280.21	17	0.0306911
2100	7280.26	17	0.0307122
2102	7280.31	17	0.0306336
2104	7280.36	17	0.030631
2106	7280.41	17	0.0306086
2108	7280.46	17	0.0305687
2110	7280.51	17	0.0306033
2112	7280.56	17	0.0304905
2114	7280.61	17	0.0304699
2116	7280.66	17	0.030433
2118	7280.71	17	0.0303983
2120	7280.76	17	0.0304286
2122	7280.81	17	0.0304093
2124	7280.86	17	0.0304532
2126	7280.91	17	0.0304707
2128	7280.96	17	0.0304624
2130	7281.01	17	0.0304778
2132	7281.06	17	0.0303724
2134	7281.11	17	0.0303803
2136	7281.16	17	0.0303781
2138	7281.21	17	0.0302982
2140	7281.26	17	0.030285
2142	7281.31	17	0.0303105
2144	7281.36	17	0.0302771
2146	7281.41	17	0.0303074
2148	7281.46	17	0.0303008
2150	7281.51	17	0.0303202
2152	7281.56	17	0.0303728
2154	7281.61	17	0.0303399
2156	7281.66	17	0.0303562
2158	7281.71	17	0.0303346
2160	7281.76	17	0.0303109
2162	7281.81	17	0.0303785
2164	7281.86	17	0.0303074
2166	7281.91	17	0.030336
2168	7281.96	17	0.0303575
2170	7282.01	17	0.0303461
2172	7282.06	17	0.0303065
2174	7282.11	17	0.0303667
2176	7282.16	17	0.0303759
2178	7282.21	17	0.0303355
2180	7282.26	17	0.0303562
2182	7282.31	17	0.0303439
2184	7282.36	17	0.0303109
2186	7282.41	17	0.0301489
2188	7282.46	17	0.0300436
2190	7282.51	17	0.0298429
2192	7282.56	17	0.0297472
2194	7282.61	17	0.0297533
2196	7282.66	17	0.0297696
2198	7282.71	17	0.0297814
2200	7282.76	17	0.0297674
2202	7282.81	17	0.0297933
2204	7282.86	17	0.0299079
2206	7282.91	17	0.0301674
2208	7282.96	17	0.0302973
2210	7283.01	17	0.0303267
2212	7283.06	17	0.0301419
2214	7283.11	17	0.0299237
2216	7283.16	17	0.0298517
2218	7283.21	17	0.0298513
2220	7283.26	17	0.0297661
2222	7283.31	17	0.0297257
2224	7283.36	17	0.0297691
2226	7283.41	17	0.0297226
2228	7283.46	17	0.0296625
2230	7283.51	17	0.0296436
2232	7283.56	17	0.0296409
2234	7283.61	17	0.0297209
2236	7283.66	17	0.0296787
2238	7283.71	17	0.0296554
2240	7283.76	17	0.0296853
2242	7283.81	17	0.0296041
2244	7283.86	17	0.0296036
2246	7283.91	17	0.0296897
2248	7283.96	17	0.0296827
2250	7284.01	17	0.02972
2252	7284.06	17	0.0297353
2254	7284.11	17	0.0297134
2256	7284.16	17	0.0297305
2258	7284.21	17	0.0297507
2260	7284.26	17	0.0297222
2262	7284.31	17	0.0297731
2264	7284.36	17	0.0297612
2266	7284.41	17	0.0298416
2268	7284.46	17	0.0300396
2270	7284.51	17	0.0300348
2272	7284.56	17	0.0300993
2274	7284.61	17	0.0300049
2276	7284.66	17	0.0299707
2278	7284.71	17	0.0297569
2280	7284.76	17	0.0297494
2282	7284.81	17	0.0297569
2284	7284.86	17	0.0298069
2286	7284.91	17	0.02977
2288	7284.96	17	0.0299636
2290	7285.01	17	0.0299487
2292	7285.06	17	0.0299206
2294	7285.11	17	0.0299514
2296	7285.16	17	0.0300133
2298	7285.21	17	0.0302771
2300	7285.26	17	0.0304203
2302	7285.31	17	0.030465
2304	7285.36	17	0.0304606
2306	7285.41	17	0.0304624
2308	7285.46	17	0.0305423
2310	7285.51	17	0.0305651
2312	7285.56	17	0.0305559
2314	7285.61	17	0.0305098
2316	7285.66	17	0.0304962
2318	7285.71	17	0.0304585
2320	7285.76	17	0.0304598
2322	7285.81	17	0.030519
2324	7285.86	17	0.030476
2326	7285.91	17	0.0304931
2328	7285.96	17	0.0304936
2330	7286.01	17	0.0303575
2332	7286.06	17	0.0303886
2334	7286.11	17	0.0304993
2336	7286.16	17	0.0304563
2338	7286.21	17	0.0305533
2340	7286.26	17	0.0303965
2342	7286.31	17	0.0305173
2344	7286.36	17	0.0306003
2346	7286.41	17	0.0304633
2348	7286.46	17	0.0305384
2350	7286.51	17	0.0304422
2352	7286.56	17	0.0305384
2354	7286.61	17	0.03057
2356	7286.66	17	0.0305502
2358	7286.71	17	0.0304905
2360	7286.76	17	0.0304861
2362	7286.81	17	0.0306257
2364	7286.86	17	0.0305581
2366	7286.91	17	0.0305485
2368	7286.96	17	0.0305888
2370	7287.01	17	0.0305537
2372	7287.06	17	0.0305594
2374	7287.11	17	0.0306095
2376	7287.16	17	0.0305015
2378	7287.21	17	0.0304681
2380	7287.26	17	0.030433
2382	7287.31	17	0.0305643
2384	7287.36	17	0.030663
2386	7287.41	17	0.0305186
2388	7287.46	17	0.0303689
2390	7287.51	17	0.0305107
2392	7287.56	17	0.0305831
2394	7287.61	17	0.0304795
2396	7287.66	17	0.0305568
2398	7287.71	17	0.0305243
2400	7287.76	17	0.0304185
2402	7287.81	17	0.0302705
2404	7287.86	17	0.0304646
2406	7287.91	17	0.0304356
2408	7287.96	17	0.0304975
2410	7288.01	17	0.0303614
2412	7288.06	17	0.0302973
2414	7288.11	17	0.0304949
2416	7288.16	17	0.0304527
2418	7288.21	17	0.0304321
2420	7288.26	17	0.0304286
2422	7288.31	17	0.0305186
2424	7288.36	17	0.030498
2426	7288.41	17	0.0305125
2428	7288.46	17	0.030415
2430	7288.51	17	0.0303412
2432	7288.56	17	0.0305164
2434	7288.61	17	0.0305032
2436	7288.66	17	0.0305028
2438	7288.71	17	0.0304391
2440	7288.76	17	0.0303434
2442	7288.81	17	0.0304453
2444	7288.86	17	0.0304611
2446	7288.91	17	0.030393
2448	7288.96	17	0.0304273
2450	7289.01	17	0.0304817
2452	7289.06	17	0.0304826
2454	7289.11	17	0.0304681
2456	7289.16	17	0.0303834
2458	7289.21	17	0.0304405
2460	7289.26	17	0.0303601
2462	7289.31	17	0.0303873
2464	7289.36	17	0.0304001
2466	7289.41	17	0.0303496
2468	7289.46	17	0.0303465
2470	7289.51	17	0.0302433
2472	7289.56	17	0.03035
2474	7289.61	17	0.0303386
2476	7289.66	17	0.0302921
2478	7289.71	17	0.0303346
2480	7289.76	17	0.0303241
2482	7289.81	17	0.0303333
2484	7289.86	17	0.0303684
2486	7289.91	17	0.0303267
2488	7289.96	17	0.0304058
2490	7290.01	17	0.030415
2492	7290.06	17	0.030282
2494	7290.11	17	0.0303579
2496	7290.16	17	0.0304181
2498	7290.21	17	0.0303425
2500	7290.26	17	0.0303566
2502	7290.31	17	0.0303368
2504	7290.36	17	0.0304005
2506	7290.41	17	0.0302995
2508	7290.46	17	0.0303777
2510	7290.51	17	0.0303948
2512	7290.56	17	0.0303522
2514	7290.61	17	0.0303531
2516	7290.66	17	0.0304075
2518	7290.71	17	0.0303566
2520	7290.76	17	0.0303807
2522	7290.81	17	0.0304049
2524	7290.86	17	0.0303847
2526	7290.91	17	0.0304154
2528	7290.96	17	0.0303303
2530	7291.01	17	0.030339
2532	7291.06	17	0.0304115
2534	7291.11	17	0.0303298
2536	7291.16	17	0.03039
2538	7291.21	17	0.0302942
2540	7291.26	17	0.0302762
2542	7291.31	17	0.0303592
2544	7291.36	17	0.0303048
2546	7291.41	17	0.0303342
2548	7291.46	17	0.0303821
2550	7291.51	17	0.0303052
2552	7291.56	17	0.0303276
2554	7291.61	17	0.0303575
2556	7291.66	17	0.0302947
2558	7291.71	17	0.0303513
2560	7291.76	17	0.0303228
2562	7291.81	17	0.0302429
2564	7291.86	17	0.0303118
2566	7291.91	17	0.0303469
2568	7291.96	17	0.0302626
2570	7292.01	17	0.0303074
2572	7292.06	17	0.0303043
2574	7292.11	17	0.0302741
2576	7292.16	17	0.0303162
2578	7292.21	17	0.0303395
2580	7292.26	17	0.0303544
2582	7292.31	17	0.0303663
2584	7292.36	17	0.0303557
2586	7292.41	17	0.0303553
2588	7292.46	17	0.0303057
2590	7292.51	17	0.0303592
2592	7292.56	17	0.030285
2594	7292.61	17	0.0302359
2596	7292.66	17	0.0302859
2598	7292.71	17	0.0303882
2600	7292.76	17	0.0304523
2602	7292.81	17	0.0304097
2604	7292.86	17	0.0304396
2606	7292.91	17	0.0303944
2608	7292.96	17	0.0303693
2610	7293.01	17	0.0303417
2612	7293.06	17	0.0304756
2614	7293.11	17	0.0303759
2616	7293.16	17	0.0303575
2618	7293.21	17	0.0304532
2620	7293.26	17	0.0304589
2622	7293.31	17	0.0303939
2624	7293.36	17	0.0305076
2626	7293.41	17	0.0304563
2628	7293.46	17	0.030433
2630	7293.51	17	0.0305182
2632	7293.56	17	0.0304014
2634	7293.61	17	0.0303087
2636	7293.66	17	0.030426
2638	7293.71	17	0.0304866
2640	7293.76	17	0.0304866
2642	7293.81	17	0.0303676
2644	7293.86	17	0.0303733
2646	7293.91	17	0.0304852
2648	7293.96	17	0.0303759
2650	7294.01	17	0.0303504
2652	7294.06	17	0.0303864
2654	7294.11	17	0.0304255
2656	7294.16	17	0.0303737
2658	7294.21	17	0.0303987
2660	7294.26	17	0.030397
2662	7294.31	17	0.0303944
2664	7294.36	17	0.0304277
2666	7294.41	17	0.0303614
2668	7294.46	17	0.0303171
2670	7294.51	17	0.0302824
2672	7294.56	17	0.0303158
2674	7294.61	17	0.0302662
2676	7294.66	17	0.0302969
2678	7294.71	17	0.0303241
2680	7294.76	17	0.0302582
2682	7294.81	17	0.030314
2684	7294.86	17	0.0302587
2686	7294.91	17	0.0302767
2688	7294.96	17	0.0302411
2690	7295.01	17	0.0302556
2692	7295.06	17	0.0302837
2694	7295.11	17	0.0302741
2696	7295.16	17	0.0302398
2698	7295.21	17	0.0302143
2700	7295.26	17	0.0301766
2702	7295.31	17	0.0301801
2704	7295.36	17	0.0302113
2706	7295.41	17	0.0302341
2708	7295.46	17	0.0302433
2710	7295.51	17	0.0302288
2712	7295.56	17	0.0301849
2714	7295.61	17	0.0302582
2716	7295.66	17	0.0302319
2718	7295.71	17	0.0301797
2720	7295.76	17	0.0301748
2722	7295.81	17	0.0302328
2724	7295.86	17	0.0301077
2726	7295.91	17	0.030199
2728	7295.96	17	0.0300572
2730	7296.01	17	0.0300317
2732	7296.06	17	0.0300721
2734	7296.11	17	0.0300497
2736	7296.16	17	0.0300998
2738	7296.21	17	0.0300629
2740	7296.26	17	0.0299953
2742	7296.31	17	0.0300229
2744	7296.36	17	0.029997
2746	7296.41	17	0.0300826
2748	7296.46	17	0.0301511
2750	7296.51	17	0.0300958
2752	7296.56	17	0.0301204
2754	7296.61	17	0.0301151
2756	7296.66	17	0.030127
2758	7296.71	17	0.030188
2760	7296.76	17	0.0301393
2762	7296.81	17	0.0301718
2764	7296.86	17	0.0301713
2766	7296.91	17	0.03017
2768	7296.96	17	0.0302016
2770	7297.01	17	0.0302345
2772	7297.06	17	0.0301603
2774	7297.11	17	0.0301731
2776	7297.16	17	0.0300857
2778	7297.21	17	0.0300717
2780	7297.26	17	0.0301766
2782	7297.31	17	0.030145
2784	7297.36	17	0.03013
2786	7297.41	17	0.0301019
2788	7297.46	17	0.0300708
2790	7297.51	17	0.0300207
2792	7297.56	17	0.030037
2794	7297.61	17	0.0301524
2796	7297.66	17	0.0300905
2798	7297.71	17	0.0301151
2800	7297.76	17	0.0300466
2802	7297.81	17	0.0300106
2804	7297.86	17	0.0301257
2806	7297.91	17	0.0301011
2808	7297.96	17	0.0300848
2810	7298.01	17	0.0300558
2812	7298.06	17	0.0299852
2814	7298.11	17	0.0300664
2816	7298.16	17	0.0300962
2818	7298.21	17	0.0301854
2820	7298.26	17	0.030174
2822	7298.31	17	0.0301696
2824	7298.36	17	0.030166
2826	7298.41	17	0.0301002
2828	7298.46	17	0.0299975
2830	7298.51	17	0.0300563
2832	7298.56	17	0.0300967
2834	7298.61	17	0.0300198
2836	7298.66	17	0.0301081
2838	7298.71	17	0.0300093
2840	7298.76	17	0.0299891
2842	7298.81	17	0.0300234
2844	7298.86	17	0.0300914
2846	7298.91	17	0.0299975
2848	7298.96	17	0.0299505
2850	7299.01	17	0.029889
2852	7299.06	17	0.029968
2854	7299.11	17	0.0299926
2856	7299.16	17	0.0299852
2858	7299.21	17	0.029929
2860	7299.26	17	0.0299755
2862	7299.31	17	0.0299259
2864	7299.36	17	0.0299729
2866	7299.41	17	0.0300256
2868	7299.46	17	0.0299931
2870	7299.51	17	0.0299992
2872	7299.56	17	0.0300576
2874	7299.61	17	0.0299597
2876	7299.66	17	0.0299926
2878	7299.71	17	0.030037
2880	7299.76	17	0.0299979
2882	7299.81	17	0.0300431
2884	7299.86	17	0.0300137
2886	7299.91	17	0.0299843
2888	7299.96	17	0.0300598
2890	7300.01	17	0.0299996
2892	7300.06	17	0.0299931
2894	7300.11	17	0.0299724
2896	7300.16	17	0.0300014
2898	7300.21	17	0.029968
2900	7300.26	17	0.0299535
2902	7300.31	17	0.0299698
2904	7300.36	17	0.0299874
2906	7300.41	17	0.0299408
2908	7300.46	17	0.0299632
2910	7300.51	17	0.0300449
2912	7300.56	17	0.0300523
2914	7300.61	17	0.0301204
2916	7300.66	17	0.0300198
2918	7300.71	17	0.0300572
2920	7300.76	17	0.0299742
2922	7300.81	17	0.0299619
2924	7300.86	17	0.0299421
2926	7300.91	17	0.0300357
2928	7300.96	17	0.0300984
2930	7301.01	17	0.0301344
2932	7301.06	17	0.0301415
2934	7301.11	17	0.0300624
2936	7301.16	17	0.0300743
2938	7301.21	17	0.0300659
2940	7301.26	17	0.0300883
2942	7301.31	17	0.0300804
2944	7301.36	17	0.0299452
2946	7301.41	17	0.0298332
2948	7301.46	17	0.0298631
2950	7301.51	17	0.0297784
2952	7301.56	17	0.0297086
2954	7301.61	17	0.0297656
2956	7301.66	17	0.029756
2958	7301.71	17	0.0297362
2960	7301.76	17	0.0297766
2962	7301.81	17	0.0296897
2964	7301.86	17	0.0294333
2966	7301.91	17	0.0296238
2968	7301.96	17	0.0296936
2970	7302.01	17	0.0298214
2972	7302.06	17	0.029799
2974	7302.11	17	0.0297968
2976	7302.16	17	0.0298609
2978	7302.21	17	0.0298662
2980	7302.26	17	0.0299013
2982	7302.31	17	0.029918
2984	7302.36	17	0.0299303
2986	7302.41	17	0.029932
2988	7302.46	17	0.0300102
2990	7302.51	17	0.0299724
2992	7302.56	17	0.0299667
2994	7302.61	17	0.0299544
2996	7302.66	17	0.0299206
2998	7302.71	17	0.0299821
3000	7302.76	17	0.0299575
3002	7302.81	17	0.0299522
3004	7302.86	17	0.0299413
3006	7302.91	17	0.0298925
3008	7302.96	17	0.0299588
3010	7303.01	17	0.0299645
3012	7303.06	17	0.029936
3014	7303.11	17	0.0298758
3016	7303.16	17	0.0298693
3018	7303.21	17	0.0298201
3020	7303.26	17	0.0297907
3022	7303.31	17	0.0298495
3024	7303.36	17	0.0298526
3026	7303.41	17	0.0298205
3028	7303.46	17	0.029752
3030	7303.51	17	0.0298688
3032	7303.56	17	0.0298899
3034	7303.61	17	0.0298824
3036	7303.66	17	0.0299175
3038	7303.71	17	0.0300225
3040	7303.76	17	0.0299808
3042	7303.81	17	0.0299672
3044	7303.86	17	0.0299733
3046	7303.91	17	0.0299312
3048	7303.96	17	0.029914
3050	7304.01	17	0.0299263
3052	7304.06	17	0.0299584
3054	7304.11	17	0.029943
3056	7304.16	17	0.0299127
3058	7304.21	17	0.0299887
3060	7304.26	17	0.0299114
3062	7304.31	17	0.0299724
3064	7304.36	17	0.0299483
3066	7304.41	17	0.0299426
3068	7304.46	17	0.0299237
3070	7304.51	17	0.0299566
3072	7304.56	17	0.0299096
3074	7304.61	17	0.0299575
3076	7304.66	17	0.0299171
3078	7304.71	17	0.0299557
3080	7304.76	17	0.0299909
3082	7304.81	17	0.0299658
3084	7304.86	17	0.0299606
3086	7304.91	17	0.0299535
3088	7304.96	17	0.0299211
3090	7305.01	17	0.0300093
3092	7305.06	17	0.0299737
3094	7305.11	17	0.029997
3096	7305.16	17	0.0300141
3098	7305.21	17	0.0299913
3100	7305.26	17	0.0300124
3102	7305.31	17	0.0299852
3104	7305.36	17	0.0300032
3106	7305.41	17	0.0300523
3108	7305.46	17	0.0299759
3110	7305.51	17	0.0299795
3112	7305.56	17	0.0299988
3114	7305.61	17	0.0300238
3116	7305.66	17	0.0299816
3118	7305.71	17	0.0299931
3120	7305.76	17	0.0299593
3122	7305.81	17	0.030069
3124	7305.86	17	0.0299803
3126	7305.91	17	0.0299575
3128	7305.96	17	0.0300343
3130	7306.01	17	0.0299593
3132	7306.06	17	0.030008
3134	7306.11	17	0.0299575
3136	7306.16	17	0.0298965
3138	7306.21	17	0.0299272
3140	7306.26	17	0.0299039
3142	7306.31	17	0.0298758
3144	7306.36	17	0.0298473
3146	7306.41	17	0.0298534
3148	7306.46	17	0.0298846
3150	7306.51	17	0.0298701
3152	7306.56	17	0.0298758
3154	7306.61	17	0.0298622
3156	7306.66	17	0.029828
3158	7306.71	17	0.0298934
3160	7306.76	17	0.0298767
3162	7306.81	17	0.0298253
3164	7306.86	17	0.0298684
3166	7306.91	17	0.0298833
3168	7306.96	17	0.0298618
3170	7307.01	17	0.0298873
3172	7307.06	17	0.0298385
3174	7307.11	17	0.0298381
3176	7307.16	17	0.0298192
3178	7307.21	17	0.0297296
3180	7307.26	17	0.029666
3182	7307.31	17	0.0296032
3184	7307.36	17	0.029399
3186	7307.41	17	0.0293442
3188	7307.46	17	0.0292963
3190	7307.51	17	0.0293617
3192	7307.56	17	0.0292151
3194	7307.61	17	0.029291
3196	7307.66	17	0.0293349
3198	7307.71	17	0.0293024
3200	7307.76	17	0.0294061
3202	7307.81	17	0.0294767
3204	7307.86	17	0.0293867
3206	7307.91	17	0.0295026
3208	7307.96	17	0.0294574
3210	7308.01	17	0.0294298
3212	7308.06	17	0.0294925
3214	7308.11	17	0.0295141
3216	7308.16	17	0.0294249
3218	7308.21	17	0.0293951
3220	7308.26	17	0.0294693
3222	7308.31	17	0.0294789
3224	7308.36	17	0.0294873
3226	7308.41	17	0.0294056
3228	7308.46	17	0.0293911
3230	7308.51	17	0.0294684
3232	7308.56	17	0.0293358
3234	7308.61	17	0.0293995
3236	7308.66	17	0.0293806
3238	7308.71	17	0.0293749
3240	7308.76	17	0.02941
3242	7308.81	17	0.0293911
3244	7308.86	17	0.0293903
3246	7308.91	17	0.0294223
3248	7308.96	17	0.0294241
3250	7309.01	17	0.0295141
3252	7309.06	17	0.0295259
3254	7309.11	17	0.0294798
3256	7309.16	17	0.029525
3258	7309.21	17	0.0295369
3260	7309.26	17	0.0295343
3262	7309.31	17	0.0295321
3264	7309.36	17	0.0295549
3266	7309.41	17	0.0295808
3268	7309.46	17	0.0296251
3270	7309.51	17	0.029612
3272	7309.56	17	0.0296107
3274	7309.61	17	0.0295707
3276	7309.66	17	0.0293319
3278	7309.71	17	0.0293112
3280	7309.76	17	0.0291962
3282	7309.81	17	0.0292915
3284	7309.86	17	0.0293512
3286	7309.91	17	0.0292919
3288	7309.96	17	0.0292366
3290	7310.01	17	0.0292976
3292	7310.06	17	0.0292243
3294	7310.11	17	0.0292383
3296	7310.16	17	0.0292282
3298	7310.21	17	0.0292541
3300	7310.26	17	0.0294197
3302	7310.31	17	0.0295426
3304	7310.36	17	0.0297072
3306	7310.41	17	0.029698
3308	7310.46	17	0.0297525
3310	7310.51	17	0.0295992
3312	7310.56	17	0.0296414
3314	7310.61	17	0.0295988
3316	7310.66	17	0.0296392
3318	7310.71	17	0.0296603
3320	7310.76	17	0.0295448
3322	7310.81	17	0.0295597
3324	7310.86	17	0.0295369
3326	7310.91	17	0.0294627
3328	7310.96	17	0.0294416
3330	7311.01	17	0.0294649
3332	7311.06	17	0.0294574
3334	7311.11	17	0.0294829
3336	7311.16	17	0.0294166
3338	7311.21	17	0.0294355
3340	7311.26	17	0.0295496
3342	7311.31	17	0.0294355
3344	7311.36	17	0.029475
3346	7311.41	17	0.0295558
3348	7311.46	17	0.0296335
3350	7311.51	17	0.0296585
3352	7311.56	17	0.0297125
3354	7311.61	17	0.0296805
3356	7311.66	17	0.0298021
3358	7311.71	17	0.0297573
3360	7311.76	17	0.0296489
3362	7311.81	17	0.0295966
3364	7311.86	17	0.029644
3366	7311.91	17	0.0296225
3368	7311.96	17	0.0296524
3370	7312.01	17	0.0296076
3372	7312.06	17	0.0296036
3374	7312.11	17	0.0296172
3376	7312.16	17	0.029619
3378	7312.21	17	0.0295909
3380	7312.26	17	0.0296247
3382	7312.31	17	0.0296708
3384	7312.36	17	0.0296396
3386	7312.41	17	0.0295992
3388	7312.46	17	0.0296032
3390	7312.51	17	0.0296629
3392	7312.56	17	0.0296458
3394	7312.61	17	0.0296589
3396	7312.66	17	0.0296515
3398	7312.71	17	0.0296374
3400	7312.76	17	0.0297068
3402	7312.81	17	0.029608
3404	7312.86	17	0.0296388
3406	7312.91	17	0.0296348
3408	7312.96	17	0.0295944
3410	7313.01	17	0.0296756
3412	7313.06	17	0.0296537
3414	7313.11	17	0.0296177
3416	7313.16	17	0.0297336
3418	7313.21	17	0.0296603
3420	7313.26	17	0.0297037
3422	7313.31	17	0.029655
3424	7313.36	17	0.0296225
3426	7313.41	17	0.0297011
3428	7313.46	17	0.0295843
3430	7313.51	17	0.0296265
3432	7313.56	17	0.0295953
3434	7313.61	17	0.0295966
3436	7313.66	17	0.0296502
3438	7313.71	17	0.0295874
3440	7313.76	17	0.0295553
3442	7313.81	17	0.0296493
3444	7313.86	17	0.0295953
3446	7313.91	17	0.0295948
3448	7313.96	17	0.0296006
3450	7314.01	17	0.0295286
3452	7314.06	17	0.0296216
3454	7314.11	17	0.0296225
3456	7314.16	17	0.0296028
3458	7314.21	17	0.0296216
3460	7314.26	17	0.0295733
3462	7314.31	17	0.0296164
3464	7314.36	17	0.029597
3466	7314.41	17	0.0296014
3468	7314.46	17	0.0296111
3470	7314.51	17	0.0296098
3472	7314.56	17	0.0296475
3474	7314.61	17	0.0296388
3476	7314.66	17	0.0296449
3478	7314.71	17	0.029648
3480	7314.76	17	0.0296251
3482	7314.81	17	0.0295861
3484	7314.86	17	0.0296317
3486	7314.91	17	0.0296085
3488	7314.96	17	0.0296449
3490	7315.01	17	0.0296344
3492	7315.06	17	0.0296467
3494	7315.11	17	0.0296124
3496	7315.16	17	0.0296124
3498	7315.21	17	0.0297108
3500	7315.26	17	0.0296528
3502	7315.31	17	0.0296462
3504	7315.36	17	0.0296379
3506	7315.41	17	0.0296651
3508	7315.46	17	0.0296844
3510	7315.51	17	0.0296001
3512	7315.56	17	0.0296071
3514	7315.61	17	0.0296827
3516	7315.66	17	0.029619
3518	7315.71	17	0.0296098
3520	7315.76	17	0.0296344
3522	7315.81	17	0.0296475
3524	7315.86	17	0.0296234
3526	7315.91	17	0.0296071
3528	7315.96	17	0.0295417
3530	7316.01	17	0.0295817
3532	7316.06	17	0.0295909
3534	7316.11	17	0.0295641
3536	7316.16	17	0.0296339
3538	7316.21	17	0.0296594
3540	7316.26	17	0.0296945
3542	7316.31	17	0.0296107
3544	7316.36	17	0.0295826
3546	7316.41	17	0.0296014
3548	7316.46	17	0.0294864
3550	7316.51	17	0.0295167
3552	7316.56	17	0.0295158
3554	7316.61	17	0.0294728
3556	7316.66	17	0.0295145
3558	7316.71	17	0.0294908
3560	7316.76	17	0.0294873
3562	7316.81	17	0.0294789
3564	7316.86	17	0.029543
3566	7316.91	17	0.029554
3568	7316.96	17	0.0296638
3570	7317.01	17	0.0295935
3572	7317.06	17	0.02959
3574	7317.11	17	0.0296849
3576	7317.16	17	0.0295641
3578	7317.21	17	0.0296001
3580	7317.26	17	0.0295303
3582	7317.31	17	0.0295062
3584	7317.36	17	0.0295233
3586	7317.41	17	0.0294855
3588	7317.46	17	0.0295667
3590	7317.51	17	0.0295567
3592	7317.56	17	0.0295299
3594	7317.61	17	0.0294381
3596	7317.66	17	0.0295176
3598	7317.71	17	0.0295233
3600	7317.76	17	0.0295584
3602	7317.81	17	0.0295549
3604	7317.86	17	0.029525
3606	7317.91	17	0.0294886
3608	7317.96	17	0.0294447
3610	7318.01	17	0.0294078
3612	7318.06	17	0.0295158
3614	7318.11	17	0.0294605
3616	7318.16	17	0.0295005
3618	7318.21	17	0.0294737
3620	7318.26	17	0.0294658
3622	7318.31	17	0.0294131
3624	7318.36	17	0.0294407
3626	7318.41	17	0.0295075
3628	7318.46	17	0.0295742
3630	7318.51	17	0.0295861
3632	7318.56	17	0.0295505
3634	7318.61	17	0.0295905
3636	7318.66	17	0.0295553
3638	7318.71	17	0.0295795
3640	7318.76	17	0.0295799
3642	7318.81	17	0.0295773
3644	7318.86	17	0.0295957
3646	7318.91	17	0.0295338
3648	7318.96	17	0.0295681
3650	7319.01	17	0.0296405
3652	7319.06	17	0.0295641
3654	7319.11	17	0.0295817
3656	7319.16	17	0.0295329
3658	7319.21	17	0.0294737
3660	7319.26	17	0.029421
3662	7319.31	17	0.0294684
3664	7319.36	17	0.029489
3666	7319.41	17	0.0295795
3668	7319.46	17	0.0295979
3670	7319.51	17	0.0295654
3672	7319.56	17	0.0296063
3674	7319.61	17	0.0295286
3676	7319.66	17	0.0295246
3678	7319.71	17	0.0295382
3680	7319.76	17	0.0294816
3682	7319.81	17	0.0295062
3684	7319.86	17	0.0295035
3686	7319.91	17	0.0294636
3688	7319.96	17	0.0293582
3690	7320.01	17	0.02932
3692	7320.06	17	0.0294043
3694	7320.11	17	0.0294113
3696	7320.16	17	0.0293582
3698	7320.21	17	0.0293494
3700	7320.26	17	0.0292981
3702	7320.31	17	0.0292901
3704	7320.36	17	0.0293108
3706	7320.41	17	0.0293178
3708	7320.46	17	0.0293547
3710	7320.51	17	0.0294965
3712	7320.56	17	0.0295101
3714	7320.61	17	0.0295303
3716	7320.66	17	0.0295106
3718	7320.71	17	0.0294526
3720	7320.76	17	0.0293854
3722	7320.81	17	0.0294548
3724	7320.86	17	0.0294078
3726	7320.91	17	0.0294702
3728	7320.96	17	0.0294614
3730	7321.01	17	0.0295386
3732	7321.06	17	0.0295927
3734	7321.11	17	0.0294565
3736	7321.16	17	0.0295496
3738	7321.21	17	0.0295839
3740	7321.26	17	0.0295378
3742	7321.31	17	0.0295299
3744	7321.36	17	0.0295527
3746	7321.41	17	0.0295567
3748	7321.46	17	0.0295562
3750	7321.51	17	0.0295373
3752	7321.56	17	0.029511
3754	7321.61	17	0.0295918
3756	7321.66	17	0.0296673
3758	7321.71	17	0.0295953
3760	7321.76	17	0.0296006
3762	7321.81	17	0.0295606
3764	7321.86	17	0.0295435
3766	7321.91	17	0.0295562
3768	7321.96	17	0.0294372
3770	7322.01	17	0.0294645
3772	7322.06	17	0.0295171
3774	7322.11	17	0.0294456
3776	7322.16	17	0.0294429
3778	7322.21	17	0.0294895
3780	7322.26	17	0.0294728
3782	7322.31	17	0.0295224
3784	7322.36	17	0.0295312
3786	7322.41	17	0.0295145
3788	7322.46	17	0.0295549
3790	7322.51	17	0.0295698
3792	7322.56	17	0.0295215
3794	7322.61	17	0.0295624
3796	7322.66	17	0.0295725
3798	7322.71	17	0.0295518
3800	7322.76	17	0.0295602
3802	7322.81	17	0.029529
3804	7322.86	17	0.0295079
3806	7322.91	17	0.0295079
3808	7322.96	17	0.0295158
3810	7323.01	17	0.0295487
3812	7323.06	17	0.0295189
3814	7323.11	17	0.0295347
3816	7323.16	17	0.0295834
3818	7323.21	17	0.0295237
3820	7323.26	17	0.0295593
3822	7323.31	17	0.0295185
3824	7323.36	17	0.0295277
3826	7323.41	17	0.029493
3828	7323.46	17	0.0295035
3830	7323.51	17	0.029489
3832	7323.56	17	0.0295632
3834	7323.61	17	0.0294978
3836	7323.66	17	0.0295185
3838	7323.71	17	0.0295048
3840	7323.76	17	0.0295334
3842	7323.81	17	0.0294947
3844	7323.86	17	0.0295106
3846	7323.91	17	0.0295518
3848	7323.96	17	0.0295571
3850	7324.01	17	0.0295356
3852	7324.06	17	0.0295918
3854	7324.11	17	0.0295132
3856	7324.16	17	0.0295628
3858	7324.21	17	0.0295628
3860	7324.26	17	0.0295347
3862	7324.31	17	0.0295119
3864	7324.36	17	0.0295395
3866	7324.41	17	0.0294767
3868	7324.46	17	0.0295536
3870	7324.51	17	0.029554
3872	7324.56	17	0.0295057
3874	7324.61	17	0.0295343
3876	7324.66	17	0.0295224
3878	7324.71	17	0.0295158
3880	7324.76	17	0.029536
3882	7324.81	17	0.0294825
3884	7324.86	17	0.0294969
3886	7324.91	17	0.0294526
3888	7324.96	17	0.0295255
3890	7325.01	17	0.0295518
3892	7325.06	17	0.029522
3894	7325.11	17	0.0295101
3896	7325.16	17	0.0294978
3898	7325.21	17	0.0295215
3900	7325.26	17	0.02945
3902	7325.31	17	0.0294767
3904	7325.36	17	0.0294855
3906	7325.41	17	0.0294969
3908	7325.46	17	0.0294056
3910	7325.51	17	0.0294425
3912	7325.56	17	0.0293521
3914	7325.61	17	0.0293701
3916	7325.66	17	0.0292506
3918	7325.71	17	0.0292844
3920	7325.76	17	0.0292937
3922	7325.81	17	0.0292348
3924	7325.86	17	0.0292107
3926	7325.91	17	0.029288
3928	7325.96	17	0.0293398
3930	7326.01	17	0.0293995
3932	7326.06	17	0.0294381
3934	7326.11	17	0.0294342
3936	7326.16	17	0.0293815
3938	7326.21	17	0.0293731
3940	7326.26	17	0.0292862
3942	7326.31	17	0.029327
3944	7326.36	17	0.0293622
3946	7326.41	17	0.0293674
3948	7326.46	17	0.0293393
3950	7326.51	17	0.0293463
3952	7326.56	17	0.0292335
3954	7326.61	17	0.0291343
3956	7326.66	17	0.0291106
3958	7326.71	17	0.0291317
3960	7326.76	17	0.0291922
3962	7326.81	17	0.0291
3964	7326.86	17	0.0292023
3966	7326.91	17	0.0293371
3968	7326.96	17	0.0293182
3970	7327.01	17	0.0294135
3972	7327.06	17	0.0294298
3974	7327.11	17	0.0293639
3976	7327.16	17	0.0293499
3978	7327.21	17	0.0293222
3980	7327.26	17	0.0293323
3982	7327.31	17	0.0293951
3984	7327.36	17	0.0293881
3986	7327.41	17	0.0293709
3988	7327.46	17	0.0293512
3990	7327.51	17	0.0292695
3992	7327.56	17	0.0293283
3994	7327.61	17	0.0293643
3996	7327.66	17	0.0293262
3998	7327.71	17	0.029367
[truncated: 39,375 more rows]

## Sheet: Mouse 2_470
FrameCounter	Timestamp	Flags	Region0G
1	7227.79	18	0.0362587
3	7227.84	18	0.0359821
5	7227.89	18	0.0358881
7	7227.94	18	0.0375188
9	7227.99	18	0.0375407
11	7228.04	18	0.0373453
13	7228.09	18	0.0373647
15	7228.14	18	0.0373932
17	7228.19	18	0.0372325
19	7228.24	18	0.0372308
21	7228.29	18	0.0371693
23	7228.34	18	0.0369796
25	7228.39	18	0.0369836
27	7228.44	18	0.0370095
29	7228.49	18	0.0368101
31	7228.54	18	0.0371816
33	7228.59	18	0.0368519
35	7228.64	18	0.0368356
37	7228.69	18	0.0368944
39	7228.74	18	0.0367443
41	7228.79	18	0.0367908
43	7228.84	18	0.036844
45	7228.89	18	0.0367834
47	7228.94	18	0.0367614
49	7228.99	18	0.0368646
51	7229.04	18	0.0368852
53	7229.09	18	0.0369449
55	7229.14	18	0.037013
57	7229.19	18	0.0368795
59	7229.24	18	0.0367847
61	7229.29	18	0.0367583
63	7229.34	18	0.0367092
65	7229.39	18	0.036876
67	7229.44	18	0.0368088
69	7229.49	18	0.0369045
71	7229.54	18	0.036815
73	7229.59	18	0.0367724
75	7229.64	18	0.0368655
77	7229.69	18	0.0368277
79	7229.74	18	0.0370275
81	7229.79	18	0.0372123
83	7229.84	18	0.0372246
85	7229.89	18	0.0372259
87	7229.94	18	0.0373071
89	7229.99	18	0.0372808
91	7230.04	18	0.037362
93	7230.09	18	0.0373664
95	7230.14	18	0.0372971
97	7230.19	18	0.037272
99	7230.24	18	0.0372084
101	7230.29	18	0.0371118
103	7230.34	18	0.0371293
105	7230.39	18	0.0370613
107	7230.44	18	0.0370086
109	7230.49	18	0.0370376
111	7230.54	18	0.0369656
113	7230.59	18	0.0369182
115	7230.64	18	0.0369449
117	7230.69	18	0.036862
119	7230.74	18	0.0368461
121	7230.79	18	0.0368014
123	7230.84	18	0.0368022
125	7230.89	18	0.0369704
127	7230.94	18	0.0369362
129	7230.99	18	0.0369401
131	7231.04	18	0.037045
133	7231.09	18	0.0369783
135	7231.14	18	0.0370442
137	7231.19	18	0.0370687
139	7231.24	18	0.036901
141	7231.29	18	0.0368703
143	7231.34	18	0.0368554
145	7231.39	18	0.036674
147	7231.44	18	0.0365933
149	7231.49	18	0.0363636
151	7231.54	18	0.0361494
153	7231.59	18	0.0358306
155	7231.64	18	0.0358245
157	7231.69	18	0.0356651
159	7231.74	18	0.0350461
161	7231.79	18	0.0349789
163	7231.84	18	0.0348059
165	7231.89	18	0.0350461
167	7231.94	18	0.0348748
169	7231.99	18	0.0350311
171	7232.04	18	0.0350074
173	7232.09	18	0.0349293
175	7232.14	18	0.0348731
177	7232.19	18	0.0348757
179	7232.24	18	0.0347927
181	7232.29	18	0.0349231
183	7232.34	18	0.0348041
185	7232.39	18	0.0347405
187	7232.44	18	0.0348933
189	7232.49	18	0.0348046
191	7232.54	18	0.0347365
193	7232.59	18	0.034744
195	7232.64	18	0.0348305
197	7232.69	18	0.0354675
199	7232.74	18	0.035677
201	7232.79	18	0.0356616
203	7232.84	18	0.0357538
205	7232.89	18	0.0355791
207	7232.94	18	0.0356901
209	7232.99	18	0.0353253
211	7233.04	18	0.0349486
213	7233.09	18	0.0350698
215	7233.14	18	0.0352226
217	7233.19	18	0.0347414
219	7233.24	18	0.0346413
221	7233.29	18	0.034524
223	7233.34	18	0.0345723
225	7233.39	18	0.0346044
227	7233.44	18	0.0344986
229	7233.49	18	0.0342812
231	7233.54	18	0.0342496
233	7233.59	18	0.0343317
235	7233.64	18	0.0346272
237	7233.69	18	0.0348867
239	7233.74	18	0.0351734
241	7233.79	18	0.035432
243	7233.84	18	0.0355856
245	7233.89	18	0.0358802
247	7233.94	18	0.0360098
249	7233.99	18	0.0361621
251	7234.04	18	0.0362267
253	7234.09	18	0.0362016
255	7234.14	18	0.0362701
257	7234.19	18	0.0362846
259	7234.24	18	0.0361977
261	7234.29	18	0.0363724
263	7234.34	18	0.0363513
265	7234.39	18	0.0363294
267	7234.44	18	0.0363355
269	7234.49	18	0.0363658
271	7234.54	18	0.0361972
273	7234.59	18	0.0362517
275	7234.64	18	0.0361661
277	7234.69	18	0.036152
279	7234.74	18	0.0361147
281	7234.79	18	0.0359211
283	7234.84	18	0.0360616
285	7234.89	18	0.0361169
287	7234.94	18	0.0360137
289	7234.99	18	0.0361643
291	7235.04	18	0.0360765
293	7235.09	18	0.0359817
295	7235.14	18	0.0359044
297	7235.19	18	0.0357995
299	7235.24	18	0.0358153
301	7235.29	18	0.035839
303	7235.34	18	0.0357345
305	7235.39	18	0.0357077
307	7235.44	18	0.0356493
309	7235.49	18	0.0355637
311	7235.54	18	0.0355641
313	7235.59	18	0.0354851
315	7235.64	18	0.035731
317	7235.69	18	0.0358104
319	7235.74	18	0.0356238
321	7235.79	18	0.0358047
323	7235.84	18	0.035734
325	7235.89	18	0.0357103
327	7235.94	18	0.035738
329	7235.99	18	0.0356792
331	7236.04	18	0.0358341
333	7236.09	18	0.0357815
335	7236.14	18	0.03585
337	7236.19	18	0.0359321
339	7236.24	18	0.036044
341	7236.29	18	0.0363022
343	7236.34	18	0.0363066
345	7236.39	18	0.0362842
347	7236.44	18	0.0363566
349	7236.49	18	0.0360901
351	7236.54	18	0.0363057
353	7236.59	18	0.0363834
355	7236.64	18	0.0363285
357	7236.69	18	0.0362231
359	7236.74	18	0.0361292
361	7236.79	18	0.0361441
363	7236.84	18	0.0361248
365	7236.89	18	0.0358188
367	7236.94	18	0.0358811
369	7236.99	18	0.0357889
371	7237.04	18	0.0357345
373	7237.09	18	0.0358333
375	7237.14	18	0.0359479
377	7237.19	18	0.0359768
379	7237.24	18	0.036102
381	7237.29	18	0.0360374
383	7237.34	18	0.0360646
385	7237.39	18	0.0360664
387	7237.44	18	0.036123
389	7237.49	18	0.036249
391	7237.54	18	0.0363966
393	7237.59	18	0.0363865
395	7237.64	18	0.0364975
397	7237.69	18	0.036437
399	7237.74	18	0.0364045
401	7237.79	18	0.0365401
403	7237.84	18	0.0364598
405	7237.89	18	0.0365388
407	7237.94	18	0.0364883
409	7237.99	18	0.0364585
411	7238.04	18	0.0365125
413	7238.09	18	0.0364479
415	7238.14	18	0.0363808
417	7238.19	18	0.0362684
419	7238.24	18	0.0360194
421	7238.29	18	0.0358289
423	7238.34	18	0.0353648
425	7238.39	18	0.0349521
427	7238.44	18	0.0355066
429	7238.49	18	0.0356287
431	7238.54	18	0.0357736
433	7238.59	18	0.0358293
435	7238.64	18	0.0358144
437	7238.69	18	0.0361845
439	7238.74	18	0.0364053
441	7238.79	18	0.0364137
443	7238.84	18	0.0364721
445	7238.89	18	0.0361797
447	7238.94	18	0.0361244
449	7238.99	18	0.036109
451	7239.04	18	0.0358205
453	7239.09	18	0.0358258
455	7239.14	18	0.0359799
457	7239.19	18	0.036026
459	7239.24	18	0.0361353
461	7239.29	18	0.0361384
463	7239.34	18	0.0361784
465	7239.39	18	0.0360888
467	7239.44	18	0.0360313
469	7239.49	18	0.0362504
471	7239.54	18	0.0362385
473	7239.59	18	0.0363105
475	7239.64	18	0.0364795
477	7239.69	18	0.0364629
479	7239.74	18	0.0363992
481	7239.79	18	0.0365344
483	7239.84	18	0.036494
485	7239.89	18	0.0364334
487	7239.94	18	0.036404
489	7239.99	18	0.036415
491	7240.04	18	0.0365239
493	7240.09	18	0.0361972
495	7240.14	18	0.0362653
497	7240.19	18	0.0361235
499	7240.24	18	0.0362003
501	7240.29	18	0.0361538
503	7240.34	18	0.0361511
505	7240.39	18	0.0360401
507	7240.44	18	0.0360409
509	7240.49	18	0.0359189
511	7240.54	18	0.035918
513	7240.59	18	0.0359198
515	7240.64	18	0.0357459
517	7240.69	18	0.0357165
519	7240.74	18	0.035482
521	7240.79	18	0.0355712
523	7240.84	18	0.035626
525	7240.89	18	0.0355325
527	7240.94	18	0.0354004
529	7240.99	18	0.0353736
531	7241.04	18	0.0352858
533	7241.09	18	0.0351901
535	7241.14	18	0.0346276
537	7241.19	18	0.0338343
539	7241.24	18	0.0344446
541	7241.29	18	0.0353376
543	7241.34	18	0.0356164
545	7241.39	18	0.035536
547	7241.44	18	0.035623
549	7241.49	18	0.0355268
551	7241.54	18	0.0353415
553	7241.59	18	0.035234
555	7241.64	18	0.0353323
557	7241.69	18	0.0354978
559	7241.74	18	0.0355668
561	7241.79	18	0.0354171
563	7241.84	18	0.0352256
565	7241.89	18	0.0354921
567	7241.94	18	0.035601
569	7241.99	18	0.0356366
571	7242.04	18	0.0357266
573	7242.09	18	0.0357534
575	7242.14	18	0.0356484
577	7242.19	18	0.0357029
579	7242.24	18	0.0357617
581	7242.29	18	0.0357398
583	7242.34	18	0.0356559
585	7242.39	18	0.0356427
587	7242.44	18	0.0357024
589	7242.49	18	0.0355027
591	7242.54	18	0.0355624
593	7242.59	18	0.0355215
595	7242.64	18	0.0353824
597	7242.69	18	0.0353951
599	7242.74	18	0.0354307
601	7242.79	18	0.0353477
603	7242.84	18	0.0353253
605	7242.89	18	0.0353679
607	7242.94	18	0.0353898
609	7242.99	18	0.0353995
611	7243.04	18	0.03541
613	7243.09	18	0.0354812
615	7243.14	18	0.0353916
617	7243.19	18	0.0353771
619	7243.24	18	0.0354307
621	7243.29	18	0.0353872
623	7243.34	18	0.0354021
625	7243.39	18	0.0354812
627	7243.44	18	0.0353674
629	7243.49	18	0.035421
631	7243.54	18	0.0353156
633	7243.59	18	0.0353328
635	7243.64	18	0.0352528
637	7243.69	18	0.0352278
639	7243.74	18	0.0352528
641	7243.79	18	0.0351563
643	7243.84	18	0.0352296
645	7243.89	18	0.0351677
647	7243.94	18	0.0351721
649	7243.99	18	0.0351883
651	7244.04	18	0.0351874
653	7244.09	18	0.0351997
655	7244.14	18	0.035255
657	7244.19	18	0.0352116
659	7244.24	18	0.0353117
661	7244.29	18	0.0352485
663	7244.34	18	0.0352313
665	7244.39	18	0.0352059
667	7244.44	18	0.035079
669	7244.49	18	0.0350583
671	7244.54	18	0.0351927
673	7244.59	18	0.03518
675	7244.64	18	0.0351339
677	7244.69	18	0.0350922
679	7244.74	18	0.0351966
681	7244.79	18	0.0351124
683	7244.84	18	0.0352476
685	7244.89	18	0.0352133
687	7244.94	18	0.0352406
689	7244.99	18	0.0354588
691	7245.04	18	0.0354636
693	7245.09	18	0.035468
695	7245.14	18	0.0354434
697	7245.19	18	0.035518
699	7245.24	18	0.0356849
701	7245.29	18	0.0356774
703	7245.34	18	0.0356537
705	7245.39	18	0.0357095
707	7245.44	18	0.0355391
709	7245.49	18	0.0357437
711	7245.54	18	0.0355259
713	7245.59	18	0.0354711
715	7245.64	18	0.0355659
717	7245.69	18	0.0355707
719	7245.74	18	0.035713
721	7245.79	18	0.0356265
723	7245.84	18	0.0355685
725	7245.89	18	0.0356234
727	7245.94	18	0.035691
729	7245.99	18	0.0358442
731	7246.04	18	0.0356524
733	7246.09	18	0.0356506
735	7246.14	18	0.035684
737	7246.19	18	0.0355597
739	7246.24	18	0.0355558
741	7246.29	18	0.0354956
743	7246.34	18	0.035421
745	7246.39	18	0.0353126
747	7246.44	18	0.0353108
749	7246.49	18	0.0352581
751	7246.54	18	0.0353951
753	7246.59	18	0.0353025
755	7246.64	18	0.0354469
757	7246.69	18	0.0354952
759	7246.74	18	0.0354425
761	7246.79	18	0.0354833
763	7246.84	18	0.0354842
765	7246.89	18	0.0355431
767	7246.94	18	0.0356124
769	7246.99	18	0.0355861
771	7247.04	18	0.0357336
773	7247.09	18	0.035576
775	7247.14	18	0.035486
777	7247.19	18	0.035565
779	7247.24	18	0.035421
781	7247.29	18	0.0355764
783	7247.34	18	0.0354961
785	7247.39	18	0.0355312
787	7247.44	18	0.0356414
789	7247.49	18	0.035439
791	7247.54	18	0.0354258
793	7247.59	18	0.0355066
795	7247.64	18	0.0354083
797	7247.69	18	0.0354697
799	7247.74	18	0.0355018
801	7247.79	18	0.0354012
803	7247.84	18	0.035443
805	7247.89	18	0.035313
807	7247.94	18	0.0353196
809	7247.99	18	0.0354254
811	7248.04	18	0.0351962
813	7248.09	18	0.0351975
815	7248.14	18	0.0353095
817	7248.19	18	0.035288
819	7248.24	18	0.0352897
821	7248.29	18	0.0352221
823	7248.34	18	0.0349916
825	7248.39	18	0.035144
827	7248.44	18	0.0349341
829	7248.49	18	0.0350114
831	7248.54	18	0.0350105
833	7248.59	18	0.0348634
835	7248.64	18	0.0347848
837	7248.69	18	0.0348941
839	7248.74	18	0.035115
841	7248.79	18	0.0352432
843	7248.84	18	0.0352932
845	7248.89	18	0.0352208
847	7248.94	18	0.0352344
849	7248.99	18	0.0352906
851	7249.04	18	0.0353837
853	7249.09	18	0.0353543
855	7249.14	18	0.0352397
857	7249.19	18	0.0353626
859	7249.24	18	0.0354772
861	7249.29	18	0.0354351
863	7249.34	18	0.0355931
865	7249.39	18	0.0353503
867	7249.44	18	0.035374
869	7249.49	18	0.0353977
871	7249.54	18	0.0353508
873	7249.59	18	0.0354548
875	7249.64	18	0.035403
877	7249.69	18	0.0353082
879	7249.74	18	0.0353218
881	7249.79	18	0.0352919
883	7249.84	18	0.0354298
885	7249.89	18	0.0353683
887	7249.94	18	0.035241
889	7249.99	18	0.035295
891	7250.04	18	0.0352037
893	7250.09	18	0.0350948
895	7250.14	18	0.0351185
897	7250.19	18	0.0349078
899	7250.24	18	0.0347703
901	7250.29	18	0.034776
903	7250.34	18	0.0346259
905	7250.39	18	0.0346369
907	7250.44	18	0.0346408
909	7250.49	18	0.034488
911	7250.54	18	0.0346268
913	7250.59	18	0.0346474
915	7250.64	18	0.0346773
917	7250.69	18	0.0345346
919	7250.74	18	0.0346369
921	7250.79	18	0.0345328
923	7250.84	18	0.034449
925	7250.89	18	0.0341192
927	7250.94	18	0.0342843
929	7250.99	18	0.0344604
931	7251.04	18	0.0348371
933	7251.09	18	0.0349341
935	7251.14	18	0.0350083
937	7251.19	18	0.0350601
939	7251.24	18	0.0351159
941	7251.29	18	0.035144
943	7251.34	18	0.0353187
945	7251.39	18	0.0354403
947	7251.44	18	0.0354263
949	7251.49	18	0.035619
951	7251.54	18	0.0356462
953	7251.59	18	0.0357639
955	7251.64	18	0.0356572
957	7251.69	18	0.0357516
959	7251.74	18	0.0357428
961	7251.79	18	0.0356164
963	7251.84	18	0.035547
965	7251.89	18	0.0357121
967	7251.94	18	0.035529
969	7251.99	18	0.0356089
971	7252.04	18	0.0356133
973	7252.09	18	0.0355404
975	7252.14	18	0.0356879
977	7252.19	18	0.0357556
979	7252.24	18	0.0357696
981	7252.29	18	0.0359549
983	7252.34	18	0.0357147
985	7252.39	18	0.035641
987	7252.44	18	0.0357231
989	7252.49	18	0.0356102
991	7252.54	18	0.0356607
993	7252.59	18	0.0356208
995	7252.64	18	0.0356879
997	7252.69	18	0.0356361
999	7252.74	18	0.0354794
1001	7252.79	18	0.0354355
1003	7252.84	18	0.0353973
1005	7252.89	18	0.0352695
1007	7252.94	18	0.0352651
1009	7252.99	18	0.0351949
1011	7253.04	18	0.0350412
1013	7253.09	18	0.0352002
1015	7253.14	18	0.0353587
1017	7253.19	18	0.0354561
1019	7253.24	18	0.0354702
1021	7253.29	18	0.0357507
1023	7253.34	18	0.0357964
1025	7253.39	18	0.0355628
1027	7253.44	18	0.0356497
1029	7253.49	18	0.0356708
1031	7253.54	18	0.0353955
1033	7253.59	18	0.0355237
1035	7253.64	18	0.0352915
1037	7253.69	18	0.0352687
1039	7253.74	18	0.0353134
1041	7253.79	18	0.0351141
1043	7253.84	18	0.0351286
1045	7253.89	18	0.0349661
1047	7253.94	18	0.0348564
1049	7253.99	18	0.0350065
1051	7254.04	18	0.0348428
1053	7254.09	18	0.0347493
1055	7254.14	18	0.0346944
1057	7254.19	18	0.0346707
1059	7254.24	18	0.0345486
1061	7254.29	18	0.0346048
1063	7254.34	18	0.0344819
1065	7254.39	18	0.0344046
1067	7254.44	18	0.034387
1069	7254.49	18	0.034409
1071	7254.54	18	0.0344986
1073	7254.59	18	0.0343664
1075	7254.64	18	0.0344121
1077	7254.69	18	0.034434
1079	7254.74	18	0.0343023
1081	7254.79	18	0.0343923
1083	7254.84	18	0.0345016
1085	7254.89	18	0.0346557
1087	7254.94	18	0.0347686
1089	7254.99	18	0.0347506
1091	7255.04	18	0.0347769
1093	7255.09	18	0.0347058
1095	7255.14	18	0.0345403
1097	7255.19	18	0.0345908
1099	7255.24	18	0.0346803
1101	7255.29	18	0.0344582
1103	7255.34	18	0.0344059
1105	7255.39	18	0.0343396
1107	7255.44	18	0.0340964
1109	7255.49	18	0.0342127
1111	7255.54	18	0.0340516
1113	7255.59	18	0.0338611
1115	7255.64	18	0.0340499
1117	7255.69	18	0.0339915
1119	7255.74	18	0.0339129
1121	7255.79	18	0.0338106
1123	7255.84	18	0.0338176
1125	7255.89	18	0.0339577
1127	7255.94	18	0.0337956
1129	7255.99	18	0.03357
1131	7256.04	18	0.0337179
1133	7256.09	18	0.0336977
1135	7256.14	18	0.0336328
1137	7256.19	18	0.0334457
1139	7256.24	18	0.0334892
1141	7256.29	18	0.0335726
1143	7256.34	18	0.033599
1145	7256.39	18	0.0334132
1147	7256.44	18	0.0334646
1149	7256.49	18	0.0335652
1151	7256.54	18	0.0334462
1153	7256.59	18	0.033447
1155	7256.64	18	0.033361
1157	7256.69	18	0.0332473
1159	7256.74	18	0.0332771
1161	7256.79	18	0.0332697
1163	7256.84	18	0.0333746
1165	7256.89	18	0.0334602
1167	7256.94	18	0.0333689
1169	7256.99	18	0.0333267
1171	7257.04	18	0.0332943
1173	7257.09	18	0.0331292
1175	7257.14	18	0.0331459
1177	7257.19	18	0.0331384
1179	7257.24	18	0.032997
1181	7257.29	18	0.0331555
1183	7257.34	18	0.0330199
1185	7257.39	18	0.0330032
1187	7257.44	18	0.0328596
1189	7257.49	18	0.0329452
1191	7257.54	18	0.0329852
1193	7257.59	18	0.0328368
1195	7257.64	18	0.0329118
1197	7257.69	18	0.0328227
1199	7257.74	18	0.0328442
1201	7257.79	18	0.032893
1203	7257.84	18	0.0326423
1205	7257.89	18	0.0323762
1207	7257.94	18	0.0325786
1209	7257.99	18	0.0323793
1211	7258.04	18	0.0322924
1213	7258.09	18	0.0322357
1215	7258.14	18	0.0325896
1217	7258.19	18	0.0324491
1219	7258.24	18	0.0326102
1221	7258.29	18	0.0327784
1223	7258.34	18	0.0327459
1225	7258.39	18	0.0330229
1227	7258.44	18	0.0333232
1229	7258.49	18	0.0335621
1231	7258.54	18	0.0336683
1233	7258.59	18	0.03371
1235	7258.64	18	0.0337513
1237	7258.69	18	0.0338479
1239	7258.74	18	0.0337561
1241	7258.79	18	0.0337364
1243	7258.84	18	0.0336301
1245	7258.89	18	0.0336104
1247	7258.94	18	0.0337869
1249	7258.99	18	0.0337425
1251	7259.04	18	0.0334914
1253	7259.09	18	0.0332205
1255	7259.14	18	0.0332907
1257	7259.19	18	0.0335182
1259	7259.24	18	0.0333404
1261	7259.29	18	0.0330405
1263	7259.34	18	0.0331801
1265	7259.39	18	0.0328921
1267	7259.44	18	0.0327643
1269	7259.49	18	0.0324188
1271	7259.54	18	0.0325325
1273	7259.59	18	0.0327195
1275	7259.64	18	0.0330001
1277	7259.69	18	0.032756
1279	7259.74	18	0.032857
1281	7259.79	18	0.0328144
1283	7259.84	18	0.0329097
1285	7259.89	18	0.0330703
1287	7259.94	18	0.0331063
1289	7259.99	18	0.0331762
1291	7260.04	18	0.0331999
1293	7260.09	18	0.0332078
1295	7260.14	18	0.0335652
1297	7260.19	18	0.0338624
1299	7260.24	18	0.0339454
1301	7260.29	18	0.0340881
1303	7260.34	18	0.0342079
1305	7260.39	18	0.0341565
1307	7260.44	18	0.0343484
1309	7260.49	18	0.034276
1311	7260.54	18	0.0342681
1313	7260.59	18	0.0343734
1315	7260.64	18	0.0344323
1317	7260.69	18	0.0344955
1319	7260.74	18	0.0346553
1321	7260.79	18	0.0346395
1323	7260.84	18	0.0346017
1325	7260.89	18	0.0345293
1327	7260.94	18	0.0345482
1329	7260.99	18	0.0345837
1331	7261.04	18	0.0345631
1333	7261.09	18	0.0344951
1335	7261.14	18	0.0344612
1337	7261.19	18	0.034333
1339	7261.24	18	0.0344634
1341	7261.29	18	0.0344345
1343	7261.34	18	0.0344288
1345	7261.39	18	0.034384
1347	7261.44	18	0.0343941
1349	7261.49	18	0.0343308
1351	7261.54	18	0.0343366
1353	7261.59	18	0.0342681
1355	7261.64	18	0.034416
1357	7261.69	18	0.0346246
1359	7261.74	18	0.0345218
1361	7261.79	18	0.0345886
1363	7261.84	18	0.0346316
1365	7261.89	18	0.0346584
1367	7261.94	18	0.0348331
1369	7261.99	18	0.034888
1371	7262.04	18	0.0348573
1373	7262.09	18	0.034863
1375	7262.14	18	0.0348797
1377	7262.19	18	0.0348217
1379	7262.24	18	0.0351145
1381	7262.29	18	0.0350891
1383	7262.34	18	0.0352103
1385	7262.39	18	0.0352673
1387	7262.44	18	0.0351756
1389	7262.49	18	0.0349806
1391	7262.54	18	0.0348625
1393	7262.59	18	0.0348191
1395	7262.64	18	0.0349007
1397	7262.69	18	0.0349345
1399	7262.74	18	0.0348713
1401	7262.79	18	0.0350474
1403	7262.84	18	0.0350592
1405	7262.89	18	0.0348265
1407	7262.94	18	0.03505
1409	7262.99	18	0.0350834
1411	7263.04	18	0.0348283
1413	7263.09	18	0.0345842
1415	7263.14	18	0.0344582
1417	7263.19	18	0.0344612
1419	7263.24	18	0.0344244
1421	7263.29	18	0.0343752
1423	7263.34	18	0.0343471
1425	7263.39	18	0.0343651
1427	7263.44	18	0.0344419
1429	7263.49	18	0.0348248
1431	7263.54	18	0.0347515
1433	7263.59	18	0.0347897
1435	7263.64	18	0.0348678
1437	7263.69	18	0.0348349
1439	7263.74	18	0.0348678
1441	7263.79	18	0.0349951
1443	7263.84	18	0.0349455
1445	7263.89	18	0.0350974
1447	7263.94	18	0.0349907
1449	7263.99	18	0.0348437
1451	7264.04	18	0.0347365
1453	7264.09	18	0.0347826
1455	7264.14	18	0.0346553
1457	7264.19	18	0.0345881
1459	7264.24	18	0.0344415
1461	7264.29	18	0.0343616
1463	7264.34	18	0.0344108
1465	7264.39	18	0.034236
1467	7264.44	18	0.0340938
1469	7264.49	18	0.0340709
1471	7264.54	18	0.0340736
1473	7264.59	18	0.0341201
1475	7264.64	18	0.0340661
1477	7264.69	18	0.0339998
1479	7264.74	18	0.0339805
1481	7264.79	18	0.033901
1483	7264.84	18	0.0338237
1485	7264.89	18	0.0338242
1487	7264.94	18	0.0337452
1489	7264.99	18	0.0338589
1491	7265.04	18	0.0339247
1493	7265.09	18	0.0336521
1495	7265.14	18	0.0332148
1497	7265.19	18	0.0329707
1499	7265.24	18	0.0326713
1501	7265.29	18	0.0325343
1503	7265.34	18	0.0325589
1505	7265.39	18	0.0324522
1507	7265.44	18	0.0323398
1509	7265.49	18	0.0323042
1511	7265.54	18	0.0321286
1513	7265.59	18	0.0321721
1515	7265.64	18	0.032252
1517	7265.69	18	0.0325141
1519	7265.74	18	0.0327446
1521	7265.79	18	0.0323169
1523	7265.84	18	0.0324034
1525	7265.89	18	0.0324179
1527	7265.94	18	0.0326164
1529	7265.99	18	0.0324991
1531	7266.04	18	0.0326963
1533	7266.09	18	0.0330712
1535	7266.14	18	0.033368
1537	7266.19	18	0.0334321
1539	7266.24	18	0.0332139
1541	7266.29	18	0.0332253
1543	7266.34	18	0.0332324
1545	7266.39	18	0.0333263
1547	7266.44	18	0.0332605
1549	7266.49	18	0.0332842
1551	7266.54	18	0.0333808
1553	7266.59	18	0.0334861
1555	7266.64	18	0.0335849
1557	7266.69	18	0.0336367
1559	7266.74	18	0.033581
1561	7266.79	18	0.0337223
1563	7266.84	18	0.0337254
1565	7266.89	18	0.0336749
1567	7266.94	18	0.0338167
1569	7266.99	18	0.0336433
1571	7267.04	18	0.0337482
1573	7267.09	18	0.0338176
1575	7267.14	18	0.0337557
1577	7267.19	18	0.0338009
1579	7267.24	18	0.0339023
1581	7267.29	18	0.0337596
1583	7267.34	18	0.0337895
1585	7267.39	18	0.0338602
1587	7267.44	18	0.0338786
1589	7267.49	18	0.0338453
1591	7267.54	18	0.0338229
1593	7267.59	18	0.0337596
1595	7267.64	18	0.0337596
1597	7267.69	18	0.033887
1599	7267.74	18	0.0339243
1601	7267.79	18	0.0339735
1603	7267.84	18	0.0339203
1605	7267.89	18	0.0341188
1607	7267.94	18	0.0340674
1609	7267.99	18	0.0341232
1611	7268.04	18	0.0341702
1613	7268.09	18	0.0342527
1615	7268.14	18	0.0342931
1617	7268.19	18	0.0343225
1619	7268.24	18	0.0342935
1621	7268.29	18	0.0343941
1623	7268.34	18	0.0343849
1625	7268.39	18	0.0343752
1627	7268.44	18	0.0344845
1629	7268.49	18	0.0344121
1631	7268.54	18	0.0343949
1633	7268.59	18	0.0344735
1635	7268.64	18	0.0343085
1637	7268.69	18	0.0343791
1639	7268.74	18	0.0344147
1641	7268.79	18	0.0344362
1643	7268.84	18	0.0347563
1645	7268.89	18	0.0346619
1647	7268.94	18	0.0347501
1649	7268.99	18	0.0346667
1651	7269.04	18	0.0346601
1653	7269.09	18	0.0346887
1655	7269.14	18	0.0347277
1657	7269.19	18	0.0344718
1659	7269.24	18	0.0345543
1661	7269.29	18	0.0345767
1663	7269.34	18	0.0346799
1665	7269.39	18	0.0347892
1667	7269.44	18	0.0347299
1669	7269.49	18	0.0348217
1671	7269.54	18	0.0348397
1673	7269.59	18	0.0346926
1675	7269.64	18	0.0347436
1677	7269.69	18	0.0348467
1679	7269.74	18	0.0347005
1681	7269.79	18	0.0347111
1683	7269.84	18	0.0347918
1685	7269.89	18	0.0347238
1687	7269.94	18	0.0346654
1689	7269.99	18	0.0345403
1691	7270.04	18	0.0346298
1693	7270.09	18	0.0347479
1695	7270.14	18	0.0346957
1697	7270.19	18	0.0346456
1699	7270.24	18	0.0348933
1701	7270.29	18	0.0349499
1703	7270.34	18	0.0348915
1705	7270.39	18	0.034845
1707	7270.44	18	0.0346891
1709	7270.49	18	0.034553
1711	7270.54	18	0.0342228
1713	7270.59	18	0.0331599
1715	7270.64	18	0.0329527
1717	7270.69	18	0.0329983
1719	7270.74	18	0.0328666
1721	7270.79	18	0.0329891
1723	7270.84	18	0.0332644
1725	7270.89	18	0.033415
1727	7270.94	18	0.0336538
1729	7270.99	18	0.0339634
1731	7271.04	18	0.0341754
1733	7271.09	18	0.0344349
1735	7271.14	18	0.0344494
1737	7271.19	18	0.0348595
1739	7271.24	18	0.0349973
1741	7271.29	18	0.0348533
1743	7271.34	18	0.0345372
1745	7271.39	18	0.033847
1747	7271.44	18	0.0335568
1749	7271.49	18	0.0336038
1751	7271.54	18	0.0333935
1753	7271.59	18	0.0333829
1755	7271.64	18	0.0333254
1757	7271.69	18	0.0335046
1759	7271.74	18	0.0340551
1761	7271.79	18	0.0344937
1763	7271.84	18	0.0346913
1765	7271.89	18	0.0348116
1767	7271.94	18	0.0348445
1769	7271.99	18	0.034791
1771	7272.04	18	0.0348669
1773	7272.09	18	0.0346698
1775	7272.14	18	0.0347194
1777	7272.19	18	0.0348748
1779	7272.24	18	0.0351299
1781	7272.29	18	0.0352867
1783	7272.34	18	0.0351672
1785	7272.39	18	0.0349661
1787	7272.44	18	0.0350904
1789	7272.49	18	0.0349323
1791	7272.54	18	0.034982
1793	7272.59	18	0.0349477
1795	7272.64	18	0.035054
1797	7272.69	18	0.0351765
1799	7272.74	18	0.035018
1801	7272.79	18	0.0350803
1803	7272.84	18	0.0352498
1805	7272.89	18	0.0351242
1807	7272.94	18	0.0349609
1809	7272.99	18	0.0348906
1811	7273.04	18	0.0349539
1813	7273.09	18	0.035054
1815	7273.14	18	0.034888
1817	7273.19	18	0.0349113
1819	7273.24	18	0.0348015
1821	7273.29	18	0.0348366
1823	7273.34	18	0.0349754
1825	7273.39	18	0.0351119
1827	7273.44	18	0.0352103
1829	7273.49	18	0.0352704
1831	7273.54	18	0.0352274
1833	7273.59	18	0.0352507
1835	7273.64	18	0.0354043
1837	7273.69	18	0.0355049
1839	7273.74	18	0.0354412
1841	7273.79	18	0.0354798
1843	7273.84	18	0.0353336
1845	7273.89	18	0.0353244
1847	7273.94	18	0.0354645
1849	7273.99	18	0.0353503
1851	7274.04	18	0.0353767
1853	7274.09	18	0.0353262
1855	7274.14	18	0.0353152
1857	7274.19	18	0.0353938
1859	7274.24	18	0.0353486
1861	7274.29	18	0.0353284
1863	7274.34	18	0.0354245
1865	7274.39	18	0.0355303
1867	7274.44	18	0.035983
1869	7274.49	18	0.0357472
1871	7274.54	18	0.0356484
1873	7274.59	18	0.0357933
1875	7274.64	18	0.0358438
1877	7274.69	18	0.0360203
1879	7274.74	18	0.0362332
1881	7274.79	18	0.0362021
1883	7274.84	18	0.0362065
1885	7274.89	18	0.0361208
1887	7274.94	18	0.0358956
1889	7274.99	18	0.0359896
1891	7275.04	18	0.0361042
1893	7275.09	18	0.0360971
1895	7275.14	18	0.0360813
1897	7275.19	18	0.03603
1899	7275.24	18	0.0359584
1901	7275.29	18	0.0358662
1903	7275.34	18	0.0359088
1905	7275.39	18	0.0359189
1907	7275.44	18	0.0359334
1909	7275.49	18	0.0358855
1911	7275.54	18	0.0358245
1913	7275.59	18	0.0357617
1915	7275.64	18	0.0356945
1917	7275.69	18	0.035731
1919	7275.74	18	0.035691
1921	7275.79	18	0.0357068
1923	7275.84	18	0.0356616
1925	7275.89	18	0.0355202
1927	7275.94	18	0.0355729
1929	7275.99	18	0.035569
1931	7276.04	18	0.0356146
1933	7276.09	18	0.0356168
1935	7276.14	18	0.0355391
1937	7276.19	18	0.0355694
1939	7276.24	18	0.0355729
1941	7276.29	18	0.0355114
1943	7276.34	18	0.035504
1945	7276.39	18	0.0355549
1947	7276.44	18	0.0354509
1949	7276.49	18	0.0354588
1951	7276.54	18	0.0354048
1953	7276.59	18	0.03541
1955	7276.64	18	0.0353876
1957	7276.69	18	0.0353165
1959	7276.74	18	0.0354214
1961	7276.79	18	0.0354214
1963	7276.84	18	0.0354157
1965	7276.89	18	0.0353999
1967	7276.94	18	0.0352932
1969	7276.99	18	0.0353666
1971	7277.04	18	0.035396
1973	7277.09	18	0.0353556
1975	7277.14	18	0.0353688
1977	7277.19	18	0.0353701
1979	7277.24	18	0.0353455
1981	7277.29	18	0.0353345
1983	7277.34	18	0.0352875
1985	7277.39	18	0.0353508
1987	7277.44	18	0.0354267
1989	7277.49	18	0.0353345
1991	7277.54	18	0.0353635
1993	7277.59	18	0.0353328
1995	7277.64	18	0.0353025
1997	7277.69	18	0.0352937
1999	7277.74	18	0.0352638
2001	7277.79	18	0.0352867
2003	7277.84	18	0.0353371
2005	7277.89	18	0.0352761
2007	7277.94	18	0.0354588
2009	7277.99	18	0.0354364
2011	7278.04	18	0.0354451
2013	7278.09	18	0.0355286
2015	7278.14	18	0.0353986
2017	7278.19	18	0.0355207
2019	7278.24	18	0.0357472
2021	7278.29	18	0.0356761
2023	7278.34	18	0.0356414
2025	7278.39	18	0.0356357
2027	7278.44	18	0.035576
2029	7278.49	18	0.0357068
2031	7278.54	18	0.0356699
2033	7278.59	18	0.0356497
2035	7278.64	18	0.0358917
2037	7278.69	18	0.0358899
2039	7278.74	18	0.03594
2041	7278.79	18	0.0359193
2043	7278.84	18	0.0358034
2045	7278.89	18	0.0358003
2047	7278.94	18	0.0356063
2049	7278.99	18	0.0355483
2051	7279.04	18	0.0355106
2053	7279.09	18	0.0353947
2055	7279.14	18	0.0354056
2057	7279.19	18	0.035306
2059	7279.24	18	0.035255
2061	7279.29	18	0.0352827
2063	7279.34	18	0.0351058
2065	7279.39	18	0.0352151
2067	7279.44	18	0.0352313
2069	7279.49	18	0.0352384
2071	7279.54	18	0.0352344
2073	7279.59	18	0.0352476
2075	7279.64	18	0.03514
2077	7279.69	18	0.0351497
2079	7279.74	18	0.0351966
2081	7279.79	18	0.0352893
2083	7279.84	18	0.0352142
2085	7279.89	18	0.0351756
2087	7279.94	18	0.0351334
2089	7279.99	18	0.0349719
2091	7280.04	18	0.0349881
2093	7280.09	18	0.0349499
2095	7280.14	18	0.0349517
2097	7280.19	18	0.0349683
2099	7280.24	18	0.0349179
2101	7280.29	18	0.0350105
2103	7280.34	18	0.0349938
2105	7280.39	18	0.0350131
2107	7280.44	18	0.0351879
2109	7280.49	18	0.0351181
2111	7280.54	18	0.0351541
2113	7280.59	18	0.0350276
2115	7280.64	18	0.0350496
2117	7280.69	18	0.0351962
2119	7280.74	18	0.0350891
2121	7280.79	18	0.0350913
2123	7280.84	18	0.0351308
2125	7280.89	18	0.0350276
2127	7280.94	18	0.0350272
2129	7280.99	18	0.0349569
2131	7281.04	18	0.0349433
2133	7281.09	18	0.0349653
2135	7281.14	18	0.0348928
2137	7281.19	18	0.0349429
2139	7281.24	18	0.0347949
2141	7281.29	18	0.0346557
2143	7281.34	18	0.0347616
2145	7281.39	18	0.0346961
2147	7281.44	18	0.0346746
2149	7281.49	18	0.0348353
2151	7281.54	18	0.0347954
2153	7281.59	18	0.0347185
2155	7281.64	18	0.0346601
2157	7281.69	18	0.0346636
2159	7281.74	18	0.0347032
2161	7281.79	18	0.0348011
2163	7281.84	18	0.0348823
2165	7281.89	18	0.0350039
2167	7281.94	18	0.0349784
2169	7281.99	18	0.0350759
2171	7282.04	18	0.0351194
2173	7282.09	18	0.0350136
2175	7282.14	18	0.0352226
2177	7282.19	18	0.0353161
2179	7282.24	18	0.035356
2181	7282.29	18	0.0353657
2183	7282.34	18	0.0353455
2185	7282.39	18	0.0352006
2187	7282.44	18	0.0351277
2189	7282.49	18	0.0344134
2191	7282.54	18	0.0342044
2193	7282.59	18	0.0342685
2195	7282.64	18	0.0343537
2197	7282.69	18	0.0344806
2199	7282.74	18	0.0345517
2201	7282.79	18	0.0346382
2203	7282.84	18	0.03487
2205	7282.89	18	0.03541
2207	7282.94	18	0.036098
2209	7282.99	18	0.0361784
2211	7283.04	18	0.0358881
2213	7283.09	18	0.0352133
2215	7283.14	18	0.0349692
2217	7283.19	18	0.0349262
2219	7283.24	18	0.0350166
2221	7283.29	18	0.0349666
2223	7283.34	18	0.0349934
2225	7283.39	18	0.0351014
2227	7283.44	18	0.0350237
2229	7283.49	18	0.0349517
2231	7283.54	18	0.0350684
2233	7283.59	18	0.0351567
2235	7283.64	18	0.0352998
2237	7283.69	18	0.0353692
2239	7283.74	18	0.0353297
2241	7283.79	18	0.0352867
2243	7283.84	18	0.0352827
2245	7283.89	18	0.0352511
2247	7283.94	18	0.0353069
2249	7283.99	18	0.0355321
2251	7284.04	18	0.0353652
2253	7284.09	18	0.0354184
2255	7284.14	18	0.0354794
2257	7284.19	18	0.0355633
2259	7284.24	18	0.0355935
2261	7284.29	18	0.0356827
2263	7284.34	18	0.0356998
2265	7284.39	18	0.0358557
2267	7284.44	18	0.0362653
2269	7284.49	18	0.0361621
2271	7284.54	18	0.0366846
2273	7284.59	18	0.0365775
2275	7284.64	18	0.0364822
2277	7284.69	18	0.0362091
2279	7284.74	18	0.0358504
2281	7284.79	18	0.0360295
2283	7284.84	18	0.0360989
2285	7284.89	18	0.0361107
2287	7284.94	18	0.0362565
2289	7284.99	18	0.0367834
2291	7285.04	18	0.0367048
2293	7285.09	18	0.0366666
2295	7285.14	18	0.036865
2297	7285.19	18	0.0371372
2299	7285.24	18	0.0375434
2301	7285.29	18	0.0378314
2303	7285.34	18	0.0377879
2305	7285.39	18	0.03773
2307	7285.44	18	0.0376641
2309	7285.49	18	0.0374836
2311	7285.54	18	0.0376241
2313	7285.59	18	0.0376983
2315	7285.64	18	0.0373519
2317	7285.69	18	0.0373357
2319	7285.74	18	0.0372496
2321	7285.79	18	0.037269
2323	7285.84	18	0.0372843
2325	7285.89	18	0.037243
2327	7285.94	18	0.0370644
2329	7285.99	18	0.0369484
2331	7286.04	18	0.0369524
2333	7286.09	18	0.0370161
2335	7286.14	18	0.0371109
2337	7286.19	18	0.0370341
2339	7286.24	18	0.0368093
2341	7286.29	18	0.0369177
2343	7286.34	18	0.0368321
2345	7286.39	18	0.0367812
2347	7286.44	18	0.0366574
2349	7286.49	18	0.0364611
2351	7286.54	18	0.0365454
2353	7286.59	18	0.0363935
2355	7286.64	18	0.0362315
2357	7286.69	18	0.0360185
2359	7286.74	18	0.0360146
2361	7286.79	18	0.0360554
2363	7286.84	18	0.0359707
2365	7286.89	18	0.0359558
2367	7286.94	18	0.0356181
2369	7286.99	18	0.0357968
2371	7287.04	18	0.0356893
2373	7287.09	18	0.0356682
2375	7287.14	18	0.0357033
2377	7287.19	18	0.035403
2379	7287.24	18	0.0351576
2381	7287.29	18	0.0355071
2383	7287.34	18	0.0354711
2385	7287.39	18	0.0353249
2387	7287.44	18	0.0352168
2389	7287.49	18	0.035219
2391	7287.54	18	0.0352542
2393	7287.59	18	0.0353727
2395	7287.64	18	0.0352458
2397	7287.69	18	0.0350676
2399	7287.74	18	0.0350764
2401	7287.79	18	0.0349025
2403	7287.84	18	0.0347392
2405	7287.89	18	0.0349969
2407	7287.94	18	0.0349468
2409	7287.99	18	0.0346856
2411	7288.04	18	0.0343932
2413	7288.09	18	0.0347831
2415	7288.14	18	0.034841
2417	7288.19	18	0.0347168
2419	7288.24	18	0.0345526
2421	7288.29	18	0.0344788
2423	7288.34	18	0.0345807
2425	7288.39	18	0.0345938
2427	7288.44	18	0.0344929
2429	7288.49	18	0.0343805
2431	7288.54	18	0.0345934
2433	7288.59	18	0.0346808
2435	7288.64	18	0.034611
2437	7288.69	18	0.0343282
2439	7288.74	18	0.0342562
2441	7288.79	18	0.0344626
2443	7288.84	18	0.0343506
2445	7288.89	18	0.0343686
2447	7288.94	18	0.0344384
2449	7288.99	18	0.0344007
2451	7289.04	18	0.0345284
2453	7289.09	18	0.0346338
2455	7289.14	18	0.0346175
2457	7289.19	18	0.0346795
2459	7289.24	18	0.0347054
2461	7289.29	18	0.0347361
2463	7289.34	18	0.0348564
2465	7289.39	18	0.0347422
2467	7289.44	18	0.0348024
2469	7289.49	18	0.0349056
2471	7289.54	18	0.0348081
2473	7289.59	18	0.0348937
2475	7289.64	18	0.0349078
2477	7289.69	18	0.0348261
2479	7289.74	18	0.0348551
2481	7289.79	18	0.0348617
2483	7289.84	18	0.0346913
2485	7289.89	18	0.034758
2487	7289.94	18	0.0346035
2489	7289.99	18	0.0347339
2491	7290.04	18	0.0347304
2493	7290.09	18	0.0345394
2495	7290.14	18	0.0346118
2497	7290.19	18	0.0345886
2499	7290.24	18	0.0344643
2501	7290.29	18	0.0344942
2503	7290.34	18	0.0343229
2505	7290.39	18	0.0343493
2507	7290.44	18	0.0343743
2509	7290.49	18	0.0342105
2511	7290.54	18	0.0343049
2513	7290.59	18	0.034355
2515	7290.64	18	0.0342865
2517	7290.69	18	0.0343164
2519	7290.74	18	0.0342206
2521	7290.79	18	0.0342944
2523	7290.84	18	0.0344094
2525	7290.89	18	0.0342659
2527	7290.94	18	0.0343383
2529	7290.99	18	0.0343892
2531	7291.04	18	0.0344261
2533	7291.09	18	0.0345732
2535	7291.14	18	0.0345653
2537	7291.19	18	0.0346465
2539	7291.24	18	0.0347515
2541	7291.29	18	0.034769
2543	7291.34	18	0.034845
2545	7291.39	18	0.0350035
2547	7291.44	18	0.0349964
2549	7291.49	18	0.035054
2551	7291.54	18	0.034996
2553	7291.59	18	0.0348876
2555	7291.64	18	0.0349271
2557	7291.69	18	0.0348911
2559	7291.74	18	0.034737
2561	7291.79	18	0.034794
2563	7291.84	18	0.0347659
2565	7291.89	18	0.0346975
2567	7291.94	18	0.0348072
2569	7291.99	18	0.0347861
2571	7292.04	18	0.0348077
2573	7292.09	18	0.0348015
2575	7292.14	18	0.0348788
2577	7292.19	18	0.034989
2579	7292.24	18	0.0349442
2581	7292.29	18	0.0349802
2583	7292.34	18	0.0349701
2585	7292.39	18	0.0349222
2587	7292.44	18	0.0349148
2589	7292.49	18	0.0349582
2591	7292.54	18	0.0348467
2593	7292.59	18	0.0348801
2595	7292.64	18	0.034899
2597	7292.69	18	0.0350096
2599	7292.74	18	0.0351611
2601	7292.79	18	0.0350597
2603	7292.84	18	0.0349969
2605	7292.89	18	0.0350043
2607	7292.94	18	0.0348072
2609	7292.99	18	0.0346667
2611	7293.04	18	0.0349135
2613	7293.09	18	0.0347181
2615	7293.14	18	0.0346724
2617	7293.19	18	0.0348098
2619	7293.24	18	0.0346904
2621	7293.29	18	0.0350017
2623	7293.34	18	0.0348559
2625	7293.39	18	0.034931
2627	7293.44	18	0.034823
2629	7293.49	18	0.0347106
2631	7293.54	18	0.0348731
2633	7293.59	18	0.0346303
2635	7293.64	18	0.0347875
2637	7293.69	18	0.0345442
2639	7293.74	18	0.0345455
2641	7293.79	18	0.0345196
2643	7293.84	18	0.0344116
2645	7293.89	18	0.0344292
2647	7293.94	18	0.0343589
2649	7293.99	18	0.0342966
2651	7294.04	18	0.0343458
2653	7294.09	18	0.034297
2655	7294.14	18	0.0343625
2657	7294.19	18	0.0342676
2659	7294.24	18	0.0345539
2661	7294.29	18	0.0345003
2663	7294.34	18	0.0345047
2665	7294.39	18	0.034722
2667	7294.44	18	0.0347479
2669	7294.49	18	0.0345109
2671	7294.54	18	0.0345631
2673	7294.59	18	0.0346386
2675	7294.64	18	0.034589
2677	7294.69	18	0.0347084
2679	7294.74	18	0.0347629
2681	7294.79	18	0.0347497
2683	7294.84	18	0.034892
2685	7294.89	18	0.0348854
2687	7294.94	18	0.0349227
2689	7294.99	18	0.0349635
2691	7295.04	18	0.0348437
2693	7295.09	18	0.034773
2695	7295.14	18	0.0348178
2697	7295.19	18	0.0347431
2699	7295.24	18	0.0347256
2701	7295.29	18	0.0347256
2703	7295.34	18	0.034791
2705	7295.39	18	0.0349266
2707	7295.44	18	0.0348063
2709	7295.49	18	0.0347914
2711	7295.54	18	0.0347299
2713	7295.59	18	0.03469
2715	7295.64	18	0.0346355
2717	7295.69	18	0.0346202
2719	7295.74	18	0.0346865
2721	7295.79	18	0.0347378
2723	7295.84	18	0.0348028
2725	7295.89	18	0.0346044
2727	7295.94	18	0.0347185
2729	7295.99	18	0.0347633
2731	7296.04	18	0.0347247
2733	7296.09	18	0.0348511
2735	7296.14	18	0.0346808
2737	7296.19	18	0.0345811
2739	7296.24	18	0.0345925
2741	7296.29	18	0.0345732
2743	7296.34	18	0.0345008
2745	7296.39	18	0.0347861
2747	7296.44	18	0.0350636
2749	7296.49	18	0.0350289
2751	7296.54	18	0.0351444
2753	7296.59	18	0.0350281
2755	7296.64	18	0.0350443
2757	7296.69	18	0.0351132
2759	7296.74	18	0.0350908
2761	7296.79	18	0.0350619
2763	7296.84	18	0.0351378
2765	7296.89	18	0.0351624
2767	7296.94	18	0.0351962
2769	7296.99	18	0.0350588
2771	7297.04	18	0.0350781
2773	7297.09	18	0.0348085
2775	7297.14	18	0.0346509
2777	7297.19	18	0.0346013
2779	7297.24	18	0.0346966
2781	7297.29	18	0.0347901
2783	7297.34	18	0.0346224
2785	7297.39	18	0.0345227
2787	7297.44	18	0.0344713
2789	7297.49	18	0.0345684
2791	7297.54	18	0.0344727
2793	7297.59	18	0.0345627
2795	7297.64	18	0.0346816
2797	7297.69	18	0.0345275
2799	7297.74	18	0.0344718
2801	7297.79	18	0.0343366
2803	7297.84	18	0.034366
2805	7297.89	18	0.0344678
2807	7297.94	18	0.0344081
2809	7297.99	18	0.0342905
2811	7298.04	18	0.0342698
2813	7298.09	18	0.0344735
2815	7298.14	18	0.0346514
2817	7298.19	18	0.0347497
2819	7298.24	18	0.034787
2821	7298.29	18	0.0347958
2823	7298.34	18	0.0347247
2825	7298.39	18	0.0346992
2827	7298.44	18	0.0345517
2829	7298.49	18	0.0345657
2831	7298.54	18	0.0345038
2833	7298.59	18	0.0344929
2835	7298.64	18	0.0345429
2837	7298.69	18	0.0345815
2839	7298.74	18	0.0346562
2841	7298.79	18	0.0346549
2843	7298.84	18	0.0344771
2845	7298.89	18	0.0346193
2847	7298.94	18	0.0345363
2849	7298.99	18	0.0344371
2851	7299.04	18	0.0344652
2853	7299.09	18	0.034528
2855	7299.14	18	0.0345596
2857	7299.19	18	0.0345539
2859	7299.24	18	0.0346588
2861	7299.29	18	0.0346843
2863	7299.34	18	0.0348098
2865	7299.39	18	0.0347229
2867	7299.44	18	0.0347111
2869	7299.49	18	0.0346856
2871	7299.54	18	0.0347383
2873	7299.59	18	0.0346996
2875	7299.64	18	0.0347005
2877	7299.69	18	0.0346865
2879	7299.74	18	0.0347176
2881	7299.79	18	0.0346189
2883	7299.84	18	0.0346338
2885	7299.89	18	0.034546
2887	7299.94	18	0.0344358
2889	7299.99	18	0.0344511
2891	7300.04	18	0.0345407
2893	7300.09	18	0.0345284
2895	7300.14	18	0.0344937
2897	7300.19	18	0.034398
2899	7300.24	18	0.0342536
2901	7300.29	18	0.0342646
2903	7300.34	18	0.0342264
2905	7300.39	18	0.0341346
2907	7300.44	18	0.0341895
2909	7300.49	18	0.0343041
2911	7300.54	18	0.0343932
2913	7300.59	18	0.0345995
2915	7300.64	18	0.0346887
2917	7300.69	18	0.0347747
2919	7300.74	18	0.034571
2921	7300.79	18	0.0346913
2923	7300.84	18	0.0348041
2925	7300.89	18	0.0346518
2927	7300.94	18	0.0349284
2929	7300.99	18	0.0350693
2931	7301.04	18	0.0350926
2933	7301.09	18	0.03514
2935	7301.14	18	0.0350149
2937	7301.19	18	0.0350548
2939	7301.24	18	0.0349833
2941	7301.29	18	0.0348937
2943	7301.34	18	0.0346904
2945	7301.39	18	0.0347835
2947	7301.44	18	0.0346816
2949	7301.49	18	0.034884
2951	7301.54	18	0.034902
2953	7301.59	18	0.0349209
2955	7301.64	18	0.035133
2957	7301.69	18	0.0351036
2959	7301.74	18	0.0351066
2961	7301.79	18	0.0351567
2963	7301.84	18	0.0343568
2965	7301.89	18	0.0343155
2967	7301.94	18	0.0346035
2969	7301.99	18	0.0347537
2971	7302.04	18	0.0349354
2973	7302.09	18	0.0348502
2975	7302.14	18	0.0349793
2977	7302.19	18	0.0350535
2979	7302.24	18	0.0351519
2981	7302.29	18	0.0350724
2983	7302.34	18	0.035133
2985	7302.39	18	0.0351413
2987	7302.44	18	0.0350461
2989	7302.49	18	0.035241
2991	7302.54	18	0.0351426
2993	7302.59	18	0.0351668
2995	7302.64	18	0.0352318
2997	7302.69	18	0.0351347
2999	7302.74	18	0.0351462
3001	7302.79	18	0.0351457
3003	7302.84	18	0.035079
3005	7302.89	18	0.0350965
3007	7302.94	18	0.0349596
3009	7302.99	18	0.034946
3011	7303.04	18	0.035014
3013	7303.09	18	0.0348169
3015	7303.14	18	0.0347339
3017	7303.19	18	0.0348366
3019	7303.24	18	0.0347519
3021	7303.29	18	0.0348454
3023	7303.34	18	0.0348401
3025	7303.39	18	0.0348028
3027	7303.44	18	0.0347962
3029	7303.49	18	0.034719
3031	7303.54	18	0.034913
3033	7303.59	18	0.0350816
3035	7303.64	18	0.0351975
3037	7303.69	18	0.0352212
3039	7303.74	18	0.0354346
3041	7303.79	18	0.0353442
3043	7303.84	18	0.0353323
3045	7303.89	18	0.0352849
3047	7303.94	18	0.0351585
3049	7303.99	18	0.0352774
3051	7304.04	18	0.0352717
3053	7304.09	18	0.0352682
3055	7304.14	18	0.0352673
3057	7304.19	18	0.0352243
3059	7304.24	18	0.035201
3061	7304.29	18	0.0352116
3063	7304.34	18	0.0352182
3065	7304.39	18	0.0351936
3067	7304.44	18	0.0350667
3069	7304.49	18	0.0350764
3071	7304.54	18	0.0351585
3073	7304.59	18	0.0351233
3075	7304.64	18	0.0350632
3077	7304.69	18	0.0351501
3079	7304.74	18	0.0350728
3081	7304.79	18	0.0351387
3083	7304.84	18	0.0350548
3085	7304.89	18	0.0350619
3087	7304.94	18	0.0350039
3089	7304.99	18	0.0349986
3091	7305.04	18	0.0348678
3093	7305.09	18	0.0349258
3095	7305.14	18	0.0348366
3097	7305.19	18	0.0348884
3099	7305.24	18	0.0348775
3101	7305.29	18	0.0348463
3103	7305.34	18	0.0349139
3105	7305.39	18	0.0348595
3107	7305.44	18	0.0349929
3109	7305.49	18	0.0349899
3111	7305.54	18	0.0348634
3113	7305.59	18	0.0349161
3115	7305.64	18	0.0348116
3117	7305.69	18	0.0347624
3119	7305.74	18	0.0347826
3121	7305.79	18	0.0347133
3123	7305.84	18	0.0347616
3125	7305.89	18	0.0347651
3127	7305.94	18	0.0347365
3129	7305.99	18	0.0348709
3131	7306.04	18	0.0349174
3133	7306.09	18	0.035032
3135	7306.14	18	0.0352629
3137	7306.19	18	0.0352291
3139	7306.24	18	0.035457
3141	7306.29	18	0.0357024
3143	7306.34	18	0.0357437
3145	7306.39	18	0.0358609
3147	7306.44	18	0.035875
3149	7306.49	18	0.035889
3151	7306.54	18	0.0358469
3153	7306.59	18	0.035756
3155	7306.64	18	0.035709
3157	7306.69	18	0.0357279
3159	7306.74	18	0.0357415
3161	7306.79	18	0.0356967
3163	7306.84	18	0.0356322
3165	7306.89	18	0.0354934
3167	7306.94	18	0.0354746
3169	7306.99	18	0.0353903
3171	7307.04	18	0.0354004
3173	7307.09	18	0.035378
3175	7307.14	18	0.0353784
3177	7307.19	18	0.0353297
3179	7307.24	18	0.0349271
3181	7307.29	18	0.0347449
3183	7307.34	18	0.0346584
3185	7307.39	18	0.0342062
3187	7307.44	18	0.0343901
3189	7307.49	18	0.034402
3191	7307.54	18	0.0343445
3193	7307.59	18	0.0345714
3195	7307.64	18	0.034776
3197	7307.69	18	0.0349328
3199	7307.74	18	0.0352612
3201	7307.79	18	0.0352682
3203	7307.84	18	0.0353363
3205	7307.89	18	0.0353235
3207	7307.94	18	0.0353591
3209	7307.99	18	0.0352471
3211	7308.04	18	0.0352858
3213	7308.09	18	0.0352946
3215	7308.14	18	0.0353758
3217	7308.19	18	0.0352924
3219	7308.24	18	0.0354921
3221	7308.29	18	0.0355527
3223	7308.34	18	0.035432
3225	7308.39	18	0.0353499
3227	7308.44	18	0.0353319
3229	7308.49	18	0.0354228
3231	7308.54	18	0.0354359
3233	7308.59	18	0.0352735
3235	7308.64	18	0.0353538
3237	7308.69	18	0.0353841
3239	7308.74	18	0.0352968
3241	7308.79	18	0.0353126
3243	7308.84	18	0.03541
3245	7308.89	18	0.035392
3247	7308.94	18	0.0354851
3249	7308.99	18	0.0354087
3251	7309.04	18	0.0353099
3253	7309.09	18	0.0353617
3255	7309.14	18	0.0353218
3257	7309.19	18	0.0352831
3259	7309.24	18	0.0352981
3261	7309.29	18	0.0351931
3263	7309.34	18	0.0352019
3265	7309.39	18	0.0352147
3267	7309.44	18	0.035054
3269	7309.49	18	0.0350373
3271	7309.54	18	0.0349411
3273	7309.59	18	0.0347839
3275	7309.64	18	0.0347076
3277	7309.69	18	0.0343458
3279	7309.74	18	0.0343366
3281	7309.79	18	0.0345394
3283	7309.84	18	0.0348314
3285	7309.89	18	0.0348116
3287	7309.94	18	0.0348726
3289	7309.99	18	0.0347049
3291	7310.04	18	0.0347567
3293	7310.09	18	0.0347954
3295	7310.14	18	0.034719
3297	7310.19	18	0.0348261
3299	7310.24	18	0.035273
3301	7310.29	18	0.0357336
3303	7310.34	18	0.0362728
3305	7310.39	18	0.0363035
3307	7310.44	18	0.0364497
3309	7310.49	18	0.0362451
3311	7310.54	18	0.0362701
3313	7310.59	18	0.0361525
3315	7310.64	18	0.03626
3317	7310.69	18	0.0361424
3319	7310.74	18	0.0361507
3321	7310.79	18	0.0359685
3323	7310.84	18	0.0358759
3325	7310.89	18	0.0357722
3327	7310.94	18	0.0357744
3329	7310.99	18	0.0357516
3331	7311.04	18	0.0358495
3333	7311.09	18	0.03594
3335	7311.14	18	0.0356989
3337	7311.19	18	0.035817
3339	7311.24	18	0.0357828
3341	7311.29	18	0.0358109
3343	7311.34	18	0.0357498
3345	7311.39	18	0.0357819
3347	7311.44	18	0.0359496
3349	7311.49	18	0.0360563
3351	7311.54	18	0.0359883
3353	7311.59	18	0.0359316
3355	7311.64	18	0.035857
3357	7311.69	18	0.0356555
3359	7311.74	18	0.0356238
3361	7311.79	18	0.0355035
3363	7311.84	18	0.0353178
3365	7311.89	18	0.0353332
3367	7311.94	18	0.035425
3369	7311.99	18	0.0354425
3371	7312.04	18	0.0354978
3373	7312.09	18	0.0353911
3375	7312.14	18	0.035468
3377	7312.19	18	0.0352766
3379	7312.24	18	0.0352155
3381	7312.29	18	0.0351874
3383	7312.34	18	0.0350886
3385	7312.39	18	0.0350298
3387	7312.44	18	0.0349828
3389	7312.49	18	0.0348454
3391	7312.54	18	0.034744
3393	7312.59	18	0.034618
3395	7312.64	18	0.0345587
3397	7312.69	18	0.0345605
3399	7312.74	18	0.0344753
3401	7312.79	18	0.0346474
3403	7312.84	18	0.0345543
3405	7312.89	18	0.0346101
3407	7312.94	18	0.0347045
3409	7312.99	18	0.0347247
3411	7313.04	18	0.0348603
3413	7313.09	18	0.0348208
3415	7313.14	18	0.0346948
3417	7313.19	18	0.0346887
3419	7313.24	18	0.0346698
3421	7313.29	18	0.0346988
3423	7313.34	18	0.0347405
3425	7313.39	18	0.0346031
3427	7313.44	18	0.0346571
3429	7313.49	18	0.0346426
3431	7313.54	18	0.0345574
3433	7313.59	18	0.0345903
3435	7313.64	18	0.0346329
3437	7313.69	18	0.0345732
3439	7313.74	18	0.0345596
3441	7313.79	18	0.0345785
3443	7313.84	18	0.0345034
3445	7313.89	18	0.0344323
3447	7313.94	18	0.0344081
3449	7313.99	18	0.0344459
3451	7314.04	18	0.0344353
3453	7314.09	18	0.0343322
3455	7314.14	18	0.0343783
3457	7314.19	18	0.0342667
3459	7314.24	18	0.034294
3461	7314.29	18	0.0341644
3463	7314.34	18	0.034074
3465	7314.39	18	0.0340771
3467	7314.44	18	0.0340472
3469	7314.49	18	0.0340257
3471	7314.54	18	0.0340837
3473	7314.59	18	0.0339713
3475	7314.64	18	0.0341438
3477	7314.69	18	0.0340999
3479	7314.74	18	0.0340494
3481	7314.79	18	0.0340665
3483	7314.84	18	0.0339375
3485	7314.89	18	0.0339757
3487	7314.94	18	0.0338532
3489	7314.99	18	0.0338312
3491	7315.04	18	0.0338242
3493	7315.09	18	0.0337566
3495	7315.14	18	0.0338123
3497	7315.19	18	0.0338382
3499	7315.24	18	0.0340485
3501	7315.29	18	0.034024
3503	7315.34	18	0.033966
3505	7315.39	18	0.0340283
3507	7315.44	18	0.034056
3509	7315.49	18	0.033926
3511	7315.54	18	0.0340367
3513	7315.59	18	0.0341381
3515	7315.64	18	0.0342584
3517	7315.69	18	0.0342896
3519	7315.74	18	0.034139
3521	7315.79	18	0.0342224
3523	7315.84	18	0.0340859
3525	7315.89	18	0.0341293
3527	7315.94	18	0.0340525
3529	7315.99	18	0.0339361
3531	7316.04	18	0.0339866
3533	7316.09	18	0.0339555
3535	7316.14	18	0.0338057
3537	7316.19	18	0.0338931
3539	7316.24	18	0.0340512
3541	7316.29	18	0.0339844
3543	7316.34	18	0.0339985
3545	7316.39	18	0.0338031
3547	7316.44	18	0.0340534
3549	7316.49	18	0.0341368
3551	7316.54	18	0.0342479
3553	7316.59	18	0.0344744
3555	7316.64	18	0.0345346
3557	7316.69	18	0.0344972
3559	7316.74	18	0.0345583
3561	7316.79	18	0.034441
3563	7316.84	18	0.0345179
3565	7316.89	18	0.0345881
3567	7316.94	18	0.0346518
3569	7316.99	18	0.0346852
3571	7317.04	18	0.0345644
3573	7317.09	18	0.0345745
3575	7317.14	18	0.0345565
3577	7317.19	18	0.0344577
3579	7317.24	18	0.0344288
3581	7317.29	18	0.034423
3583	7317.34	18	0.0344235
3585	7317.39	18	0.0343835
3587	7317.44	18	0.0347014
3589	7317.49	18	0.0346478
3591	7317.54	18	0.0347291
3593	7317.59	18	0.0344788
3595	7317.64	18	0.0344542
3597	7317.69	18	0.0343401
3599	7317.74	18	0.0344621
3601	7317.79	18	0.0344665
3603	7317.84	18	0.0345201
3605	7317.89	18	0.0343985
3607	7317.94	18	0.0341767
3609	7317.99	18	0.0341873
3611	7318.04	18	0.034045
3613	7318.09	18	0.034092
3615	7318.14	18	0.0341952
3617	7318.19	18	0.0341197
3619	7318.24	18	0.0342707
3621	7318.29	18	0.0341803
3623	7318.34	18	0.0341236
3625	7318.39	18	0.0341429
3627	7318.44	18	0.0341276
3629	7318.49	18	0.0343172
3631	7318.54	18	0.034326
3633	7318.59	18	0.0342667
3635	7318.64	18	0.0344296
3637	7318.69	18	0.0342966
3639	7318.74	18	0.0342646
3641	7318.79	18	0.0343023
3643	7318.84	18	0.0342281
3645	7318.89	18	0.0342009
3647	7318.94	18	0.0342558
3649	7318.99	18	0.0340929
3651	7319.04	18	0.0341508
3653	7319.09	18	0.0341008
3655	7319.14	18	0.0340301
3657	7319.19	18	0.0339743
3659	7319.24	18	0.0340016
3661	7319.29	18	0.0339037
3663	7319.34	18	0.0338839
3665	7319.39	18	0.03398
3667	7319.44	18	0.0339757
3669	7319.49	18	0.0340749
3671	7319.54	18	0.0339546
3673	7319.59	18	0.0339963
3675	7319.64	18	0.0339471
3677	7319.69	18	0.0339467
3679	7319.74	18	0.033937
3681	7319.79	18	0.033876
3683	7319.84	18	0.0338611
3685	7319.89	18	0.033782
3687	7319.94	18	0.0336016
3689	7319.99	18	0.0335687
3691	7320.04	18	0.0336499
3693	7320.09	18	0.0337596
3695	7320.14	18	0.0337359
3697	7320.19	18	0.033829
3699	7320.24	18	0.0336885
3701	7320.29	18	0.0337807
3703	7320.34	18	0.0337715
3705	7320.39	18	0.0337004
3707	7320.44	18	0.0337517
3709	7320.49	18	0.0340771
3711	7320.54	18	0.0342997
3713	7320.59	18	0.0345091
3715	7320.64	18	0.0344371
3717	7320.69	18	0.0343976
3719	7320.74	18	0.0343269
3721	7320.79	18	0.0341947
3723	7320.84	18	0.0342834
3725	7320.89	18	0.0342101
3727	7320.94	18	0.03451
3729	7320.99	18	0.0347712
3731	7321.04	18	0.0348248
3733	7321.09	18	0.0347348
3735	7321.14	18	0.0347172
3737	7321.19	18	0.0348379
3739	7321.24	18	0.03483
3741	7321.29	18	0.0347756
3743	7321.34	18	0.0345069
3745	7321.39	18	0.0344432
3747	7321.44	18	0.034373
3749	7321.49	18	0.0344222
3751	7321.54	18	0.0344498
3753	7321.59	18	0.0345038
3755	7321.64	18	0.0345174
3757	7321.69	18	0.0345289
3759	7321.74	18	0.0344375
3761	7321.79	18	0.0344125
3763	7321.84	18	0.0343884
3765	7321.89	18	0.0342264
3767	7321.94	18	0.0341579
3769	7321.99	18	0.034207
3771	7322.04	18	0.0341864
3773	7322.09	18	0.034211
3775	7322.14	18	0.0341811
3777	7322.19	18	0.0340999
3779	7322.24	18	0.0340903
3781	7322.29	18	0.0341148
3783	7322.34	18	0.0340038
3785	7322.39	18	0.0340696
3787	7322.44	18	0.0339739
3789	7322.49	18	0.0339726
3791	7322.54	18	0.0339533
3793	7322.59	18	0.0337838
3795	7322.64	18	0.0338905
3797	7322.69	18	0.0341513
3799	7322.74	18	0.0340626
3801	7322.79	18	0.0340867
3803	7322.84	18	0.0339998
3805	7322.89	18	0.0339757
3807	7322.94	18	0.0340569
3809	7322.99	18	0.0338909
3811	7323.04	18	0.0338742
3813	7323.09	18	0.0340297
3815	7323.14	18	0.0340437
3817	7323.19	18	0.0340903
3819	7323.24	18	0.0341012
3821	7323.29	18	0.0340683
3823	7323.34	18	0.0340942
3825	7323.39	18	0.0340446
3827	7323.44	18	0.0340652
3829	7323.49	18	0.0340894
3831	7323.54	18	0.0340995
3833	7323.59	18	0.0340722
3835	7323.64	18	0.0341034
3837	7323.69	18	0.0340095
3839	7323.74	18	0.033991
3841	7323.79	18	0.0339339
3843	7323.84	18	0.033941
3845	7323.89	18	0.0339331
3847	7323.94	18	0.0337921
3849	7323.99	18	0.033779
3851	7324.04	18	0.0337078
3853	7324.09	18	0.0337368
3855	7324.14	18	0.0337421
3857	7324.19	18	0.0336415
3859	7324.24	18	0.0336354
3861	7324.29	18	0.0336503
3863	7324.34	18	0.0335524
3865	7324.39	18	0.0335133
3867	7324.44	18	0.0334901
3869	7324.49	18	0.0334602
3871	7324.54	18	0.0335054
3873	7324.59	18	0.0334773
3875	7324.64	18	0.033501
3877	7324.69	18	0.0334861
3879	7324.74	18	0.0333663
3881	7324.79	18	0.0334997
3883	7324.84	18	0.0334879
3885	7324.89	18	0.0335529
3887	7324.94	18	0.0335744
3889	7324.99	18	0.033674
3891	7325.04	18	0.033739
3893	7325.09	18	0.0337842
3895	7325.14	18	0.0337965
3897	7325.19	18	0.0338347
3899	7325.24	18	0.0336982
3901	7325.29	18	0.0337175
3903	7325.34	18	0.0338549
3905	7325.39	18	0.03389
3907	7325.44	18	0.0339089
3909	7325.49	18	0.0338707
3911	7325.54	18	0.0338128
3913	7325.59	18	0.0337763
3915	7325.64	18	0.0337013
3917	7325.69	18	0.0336644
3919	7325.74	18	0.0337364
3921	7325.79	18	0.034006
3923	7325.84	18	0.034132
3925	7325.89	18	0.0340977
3927	7325.94	18	0.0343756
3929	7325.99	18	0.0344924
3931	7326.04	18	0.0344266
3933	7326.09	18	0.0343827
3935	7326.14	18	0.0343212
3937	7326.19	18	0.034092
3939	7326.24	18	0.0342602
3941	7326.29	18	0.0342808
3943	7326.34	18	0.0342663
3945	7326.39	18	0.0344608
3947	7326.44	18	0.0343875
3949	7326.49	18	0.034373
3951	7326.54	18	0.0342751
3953	7326.59	18	0.0339893
3955	7326.64	18	0.0342325
3957	7326.69	18	0.0343598
3959	7326.74	18	0.0343664
3961	7326.79	18	0.0345416
3963	7326.84	18	0.0343339
3965	7326.89	18	0.0348876
3967	7326.94	18	0.0350017
3969	7326.99	18	0.0349372
3971	7327.04	18	0.0349719
3973	7327.09	18	0.0350439
3975	7327.14	18	0.0347273
3977	7327.19	18	0.0345596
3979	7327.24	18	0.0349025
3981	7327.29	18	0.0349582
3983	7327.34	18	0.0349758
3985	7327.39	18	0.0350171
3987	7327.44	18	0.0347717
3989	7327.49	18	0.0346904
3991	7327.54	18	0.0346847
3993	7327.59	18	0.0346843
3995	7327.64	18	0.034672
3997	7327.69	18	0.034773
[truncated: 39,376 more rows]

## Sheet: Mouse 2_Event Trials
7704.636352	Down
7735.34	Down
7856.49	Down
7887.99	Down
8012.44	Down
8071.64	Down
8192.19	Down
8225.94	Down
8346.73	Down
8380.68	Down
8502.38	Down
8532.88	Down
8654.63	Down
8690.53	Down
8813.98	Down
8856.28	Down
8981.38	Down
9017.13	Down
9138.48	Down
9169.23	Down

## Sheet: Mouse 3_415
FrameCounter	Timestamp	Flags	Region0G
2	2840.91	17	0.0490293
4	2840.96	17	0.0478838
6	2841.01	17	0.0464358
8	2841.06	17	0.045855
10	2841.11	17	0.0451744
12	2841.16	17	0.0447073
14	2841.21	17	0.0444733
16	2841.26	17	0.0439675
18	2841.31	17	0.0437194
20	2841.36	17	0.0433695
22	2841.41	17	0.0432396
24	2841.46	17	0.0430578
26	2841.51	17	0.0428615
28	2841.56	17	0.0425819
30	2841.61	17	0.043121
32	2841.66	17	0.0428958
34	2841.71	17	0.0423711
36	2841.76	17	0.0419286
38	2841.81	17	0.0419681
40	2841.86	17	0.0418816
42	2841.91	17	0.0421165
44	2841.96	17	0.0420642
46	2842.01	17	0.0416928
48	2842.06	17	0.0421134
50	2842.11	17	0.0420682
52	2842.16	17	0.0420287
54	2842.21	17	0.0419325
56	2842.26	17	0.0420972
58	2842.31	17	0.0419861
60	2842.36	17	0.042167
62	2842.41	17	0.0420168
64	2842.46	17	0.0422368
66	2842.51	17	0.0423255
68	2842.56	17	0.0422938
70	2842.61	17	0.0422859
72	2842.66	17	0.0420849
74	2842.71	17	0.042383
76	2842.76	17	0.0421525
78	2842.81	17	0.0419141
80	2842.86	17	0.041868
82	2842.91	17	0.0419878
84	2842.96	17	0.0420954
86	2843.01	17	0.042041
88	2843.06	17	0.0420612
90	2843.11	17	0.0414592
92	2843.16	17	0.0417762
94	2843.21	17	0.0416695
96	2843.26	17	0.0416994
98	2843.31	17	0.0417701
100	2843.36	17	0.0416023
102	2843.41	17	0.0415532
104	2843.46	17	0.0413477
106	2843.51	17	0.0414601
108	2843.56	17	0.0412283
110	2843.61	17	0.0414904
112	2843.66	17	0.0414513
114	2843.71	17	0.0415229
116	2843.76	17	0.0419725
118	2843.81	17	0.0420471
120	2843.86	17	0.0419413
122	2843.91	17	0.0424168
124	2843.96	17	0.0420647
126	2844.01	17	0.0418491
128	2844.06	17	0.0417077
130	2844.11	17	0.0413868
132	2844.16	17	0.0415119
134	2844.21	17	0.0410781
136	2844.26	17	0.0411238
138	2844.31	17	0.0407221
140	2844.36	17	0.0407791
142	2844.41	17	0.0407682
144	2844.46	17	0.0411962
146	2844.51	17	0.0407655
148	2844.56	17	0.0405087
150	2844.61	17	0.0405469
152	2844.66	17	0.0402479
154	2844.71	17	0.040416
156	2844.76	17	0.0402505
158	2844.81	17	0.0399836
160	2844.86	17	0.0398277
162	2844.91	17	0.0399063
164	2844.96	17	0.0399928
166	2845.01	17	0.0402606
168	2845.06	17	0.0402294
170	2845.11	17	0.0401992
172	2845.16	17	0.0402887
174	2845.21	17	0.0403576
176	2845.26	17	0.0403085
178	2845.31	17	0.0402229
180	2845.36	17	0.0402031
182	2845.41	17	0.0401891
184	2845.46	17	0.0401074
186	2845.51	17	0.040103
188	2845.56	17	0.0401438
190	2845.61	17	0.0400591
192	2845.66	17	0.0403541
194	2845.71	17	0.0401702
196	2845.76	17	0.0401711
198	2845.81	17	0.0400003
200	2845.86	17	0.0403822
202	2845.91	17	0.0407919
204	2845.96	17	0.0410109
206	2846.01	17	0.0409855
208	2846.06	17	0.0412854
210	2846.11	17	0.0411348
212	2846.16	17	0.041029
214	2846.21	17	0.0411049
216	2846.26	17	0.0411444
218	2846.31	17	0.0412138
220	2846.36	17	0.0411312
222	2846.41	17	0.0408195
224	2846.46	17	0.041036
226	2846.51	17	0.041385
228	2846.56	17	0.0414785
230	2846.61	17	0.0415277
232	2846.66	17	0.0416528
234	2846.71	17	0.041212
236	2846.76	17	0.041252
238	2846.81	17	0.0413863
240	2846.86	17	0.0412748
242	2846.91	17	0.0414715
244	2846.96	17	0.0413872
246	2847.01	17	0.0413323
248	2847.06	17	0.0414065
250	2847.11	17	0.0413214
252	2847.16	17	0.0411694
254	2847.21	17	0.0412674
256	2847.26	17	0.0412134
258	2847.31	17	0.0411655
260	2847.36	17	0.0412024
262	2847.41	17	0.0412234
264	2847.46	17	0.0411664
266	2847.51	17	0.041428
268	2847.56	17	0.041349
270	2847.61	17	0.0413582
272	2847.66	17	0.0411168
274	2847.71	17	0.0410232
276	2847.76	17	0.0409025
278	2847.81	17	0.0408103
280	2847.86	17	0.041029
282	2847.91	17	0.0407651
284	2847.96	17	0.0410079
286	2848.01	17	0.0408252
288	2848.06	17	0.040888
290	2848.11	17	0.0411141
292	2848.16	17	0.0411528
294	2848.21	17	0.0408173
296	2848.26	17	0.0410961
298	2848.31	17	0.0408028
300	2848.36	17	0.0409065
302	2848.41	17	0.0411536
304	2848.46	17	0.0411497
306	2848.51	17	0.0412889
308	2848.56	17	0.041421
310	2848.61	17	0.0413626
312	2848.66	17	0.0414276
314	2848.71	17	0.041544
316	2848.76	17	0.0414465
318	2848.81	17	0.0414364
320	2848.86	17	0.0414869
322	2848.91	17	0.041479
324	2848.96	17	0.0413749
326	2849.01	17	0.0414662
328	2849.06	17	0.0414254
330	2849.11	17	0.0413547
332	2849.16	17	0.0413336
334	2849.21	17	0.0414144
336	2849.26	17	0.0411804
338	2849.31	17	0.041194
340	2849.36	17	0.0409908
342	2849.41	17	0.0408511
344	2849.46	17	0.0407655
346	2849.51	17	0.0409069
348	2849.56	17	0.0407963
350	2849.61	17	0.0410167
352	2849.66	17	0.0408845
354	2849.71	17	0.0410237
356	2849.76	17	0.0409692
358	2849.81	17	0.0412489
360	2849.86	17	0.0411356
362	2849.91	17	0.0410948
364	2849.96	17	0.0411993
366	2850.01	17	0.0412559
368	2850.06	17	0.0412362
370	2850.11	17	0.0412208
372	2850.16	17	0.0413244
374	2850.21	17	0.0412761
376	2850.26	17	0.041338
378	2850.31	17	0.041317
380	2850.36	17	0.0413183
382	2850.41	17	0.0413385
384	2850.46	17	0.0414035
386	2850.51	17	0.0413797
388	2850.56	17	0.0412858
390	2850.61	17	0.041313
392	2850.66	17	0.0414179
394	2850.71	17	0.0412779
396	2850.76	17	0.0412976
398	2850.81	17	0.0413126
400	2850.86	17	0.0412204
402	2850.91	17	0.0412204
404	2850.96	17	0.0412406
406	2851.01	17	0.0412595
408	2851.06	17	0.0413732
410	2851.11	17	0.0412915
412	2851.16	17	0.0411892
414	2851.21	17	0.0413042
416	2851.26	17	0.0412033
418	2851.31	17	0.040899
420	2851.36	17	0.0407545
422	2851.41	17	0.040672
424	2851.46	17	0.040629
426	2851.51	17	0.0405925
428	2851.56	17	0.0405653
430	2851.61	17	0.0406852
432	2851.66	17	0.0406645
434	2851.71	17	0.0408186
436	2851.76	17	0.0407361
438	2851.81	17	0.0409749
440	2851.86	17	0.0409991
442	2851.91	17	0.0409161
444	2851.96	17	0.0405627
446	2852.01	17	0.040571
448	2852.06	17	0.040341
450	2852.11	17	0.040233
452	2852.16	17	0.0403871
454	2852.21	17	0.0405201
456	2852.26	17	0.04064
458	2852.31	17	0.0406584
460	2852.36	17	0.0408898
462	2852.41	17	0.0407756
464	2852.46	17	0.0406549
466	2852.51	17	0.0408257
468	2852.56	17	0.0408674
470	2852.61	17	0.0407576
472	2852.66	17	0.0409293
474	2852.71	17	0.0408516
476	2852.76	17	0.0408195
478	2852.81	17	0.0408296
480	2852.86	17	0.0407528
482	2852.91	17	0.0408165
484	2852.96	17	0.0408371
486	2853.01	17	0.0410127
488	2853.06	17	0.0409995
490	2853.11	17	0.0410347
492	2853.16	17	0.0409442
494	2853.21	17	0.0411835
496	2853.26	17	0.0410685
498	2853.31	17	0.0409754
500	2853.36	17	0.0410237
502	2853.41	17	0.0408424
504	2853.46	17	0.0406351
506	2853.51	17	0.0405982
508	2853.56	17	0.0407519
510	2853.61	17	0.0407897
512	2853.66	17	0.0407967
514	2853.71	17	0.0407704
516	2853.76	17	0.0407919
518	2853.81	17	0.0409526
520	2853.86	17	0.0408893
522	2853.91	17	0.0408165
524	2853.96	17	0.0411418
526	2854.01	17	0.0411497
528	2854.06	17	0.0409872
530	2854.11	17	0.0410926
532	2854.16	17	0.0409622
534	2854.21	17	0.0410307
536	2854.26	17	0.0413069
538	2854.31	17	0.0410022
540	2854.36	17	0.0410825
542	2854.41	17	0.0410527
544	2854.46	17	0.0410553
546	2854.51	17	0.0408599
548	2854.56	17	0.0408432
550	2854.61	17	0.0406782
552	2854.66	17	0.04091
554	2854.71	17	0.0406575
556	2854.76	17	0.0407993
558	2854.81	17	0.0405864
560	2854.86	17	0.0407493
562	2854.91	17	0.0406817
564	2854.96	17	0.0407989
566	2855.01	17	0.0409113
568	2855.06	17	0.0409688
570	2855.11	17	0.0411813
572	2855.16	17	0.0412384
574	2855.21	17	0.0411356
576	2855.26	17	0.0411111
578	2855.31	17	0.041072
580	2855.36	17	0.0410145
582	2855.41	17	0.0408274
584	2855.46	17	0.0408942
586	2855.51	17	0.0408533
588	2855.56	17	0.0407449
590	2855.61	17	0.0406645
592	2855.66	17	0.0406004
594	2855.71	17	0.0404876
596	2855.76	17	0.0404749
598	2855.81	17	0.0404397
600	2855.86	17	0.0404288
602	2855.91	17	0.0405873
604	2855.96	17	0.0407651
606	2856.01	17	0.0409231
608	2856.06	17	0.0409161
610	2856.11	17	0.0409565
612	2856.16	17	0.0411418
614	2856.21	17	0.0411089
616	2856.26	17	0.0410588
618	2856.31	17	0.0407805
620	2856.36	17	0.0408533
622	2856.41	17	0.0408577
624	2856.46	17	0.0407783
626	2856.51	17	0.0408055
628	2856.56	17	0.0407787
630	2856.61	17	0.040838
632	2856.66	17	0.0405802
634	2856.71	17	0.0406351
636	2856.76	17	0.0406948
638	2856.81	17	0.0406048
640	2856.86	17	0.0406158
642	2856.91	17	0.0405881
644	2856.96	17	0.0403739
646	2857.01	17	0.0403809
648	2857.06	17	0.0405416
650	2857.11	17	0.0407027
652	2857.16	17	0.0406803
654	2857.21	17	0.0404253
656	2857.26	17	0.04056
658	2857.31	17	0.0404165
660	2857.36	17	0.0402777
662	2857.41	17	0.0402352
664	2857.46	17	0.0401223
666	2857.51	17	0.0401276
668	2857.56	17	0.0403708
670	2857.61	17	0.0404297
672	2857.66	17	0.0404191
674	2857.71	17	0.0405175
676	2857.76	17	0.0405069
678	2857.81	17	0.040434
680	2857.86	17	0.0404753
682	2857.91	17	0.0402646
684	2857.96	17	0.0404314
686	2858.01	17	0.0406154
688	2858.06	17	0.040456
690	2858.11	17	0.0404837
692	2858.16	17	0.0404898
694	2858.21	17	0.0403647
696	2858.26	17	0.040445
698	2858.31	17	0.0403796
700	2858.36	17	0.0403616
702	2858.41	17	0.0406891
704	2858.46	17	0.0409732
706	2858.51	17	0.040906
708	2858.56	17	0.0406681
710	2858.61	17	0.0403765
712	2858.66	17	0.0403366
714	2858.71	17	0.0402606
716	2858.76	17	0.0403353
718	2858.81	17	0.0400815
720	2858.86	17	0.039934
722	2858.91	17	0.0396503
724	2858.96	17	0.0397645
726	2859.01	17	0.0399177
728	2859.06	17	0.0399388
730	2859.11	17	0.0397026
732	2859.16	17	0.0397496
734	2859.21	17	0.0401184
736	2859.26	17	0.0399164
738	2859.31	17	0.0401574
740	2859.36	17	0.0404235
742	2859.41	17	0.0403954
744	2859.46	17	0.0403721
746	2859.51	17	0.0399594
748	2859.56	17	0.0401355
750	2859.61	17	0.0402962
752	2859.66	17	0.0405965
754	2859.71	17	0.0406018
756	2859.76	17	0.0405324
758	2859.81	17	0.0404059
760	2859.86	17	0.0404512
762	2859.91	17	0.0405315
764	2859.96	17	0.0401381
766	2860.01	17	0.0404766
768	2860.06	17	0.040337
770	2860.11	17	0.0401403
772	2860.16	17	0.0399322
774	2860.21	17	0.0397728
776	2860.26	17	0.0397553
778	2860.31	17	0.0394234
780	2860.36	17	0.0396846
782	2860.41	17	0.0393171
784	2860.46	17	0.039354
786	2860.51	17	0.039347
788	2860.56	17	0.0392723
790	2860.61	17	0.0396126
792	2860.66	17	0.0401689
794	2860.71	17	0.0401623
796	2860.76	17	0.040233
798	2860.81	17	0.0405451
800	2860.86	17	0.0404389
802	2860.91	17	0.040564
804	2860.96	17	0.0406988
806	2861.01	17	0.0411918
808	2861.06	17	0.040931
810	2861.11	17	0.0407774
812	2861.16	17	0.0405298
814	2861.21	17	0.0404995
816	2861.26	17	0.0403879
818	2861.31	17	0.0400854
820	2861.36	17	0.0404986
822	2861.41	17	0.0407532
824	2861.46	17	0.0403844
826	2861.51	17	0.0400859
828	2861.56	17	0.0401904
830	2861.61	17	0.0400582
832	2861.66	17	0.040002
834	2861.71	17	0.0404055
836	2861.76	17	0.040521
838	2861.81	17	0.0406285
840	2861.86	17	0.0405319
842	2861.91	17	0.0403361
844	2861.96	17	0.0402439
846	2862.01	17	0.04015
848	2862.06	17	0.0401491
850	2862.11	17	0.040211
852	2862.16	17	0.0399406
854	2862.21	17	0.0398066
856	2862.26	17	0.0397232
858	2862.31	17	0.0396929
860	2862.36	17	0.0398194
862	2862.41	17	0.0399182
864	2862.46	17	0.040099
866	2862.51	17	0.0399902
868	2862.56	17	0.0400437
870	2862.61	17	0.0401943
872	2862.66	17	0.0402202
874	2862.71	17	0.0402101
876	2862.76	17	0.0401381
878	2862.81	17	0.0402136
880	2862.86	17	0.0402523
882	2862.91	17	0.0402927
884	2862.96	17	0.0401948
886	2863.01	17	0.0402229
888	2863.06	17	0.0401074
890	2863.11	17	0.0402259
892	2863.16	17	0.0403594
894	2863.21	17	0.0402549
896	2863.26	17	0.0403664
898	2863.31	17	0.0404345
900	2863.36	17	0.0404213
902	2863.41	17	0.0401653
904	2863.46	17	0.0403555
906	2863.51	17	0.0403454
908	2863.56	17	0.0403634
910	2863.61	17	0.040431
912	2863.66	17	0.0405565
914	2863.71	17	0.0406018
916	2863.76	17	0.0403699
918	2863.81	17	0.0403511
920	2863.86	17	0.0402404
922	2863.91	17	0.0402918
924	2863.96	17	0.0401526
926	2864.01	17	0.0402896
928	2864.06	17	0.0403879
930	2864.11	17	0.0404349
932	2864.16	17	0.04069
934	2864.21	17	0.0403919
936	2864.26	17	0.0402316
938	2864.31	17	0.0400955
940	2864.36	17	0.04042
942	2864.41	17	0.0402619
944	2864.46	17	0.0403225
946	2864.51	17	0.0401965
948	2864.56	17	0.0400051
950	2864.61	17	0.0402518
952	2864.66	17	0.0401583
954	2864.71	17	0.0402202
956	2864.76	17	0.0404793
958	2864.81	17	0.0405197
960	2864.86	17	0.0404832
962	2864.91	17	0.0402246
964	2864.96	17	0.0400284
966	2865.01	17	0.0398681
968	2865.06	17	0.0401478
970	2865.11	17	0.0396692
972	2865.16	17	0.0396872
974	2865.21	17	0.0395458
976	2865.26	17	0.0395906
978	2865.31	17	0.0397052
980	2865.36	17	0.039793
982	2865.41	17	0.0394181
984	2865.46	17	0.0392587
986	2865.51	17	0.0392214
988	2865.56	17	0.039527
990	2865.61	17	0.0398304
992	2865.66	17	0.0396236
994	2865.71	17	0.0391674
996	2865.76	17	0.0386735
998	2865.81	17	0.0383516
1000	2865.86	17	0.0379837
1002	2865.91	17	0.0379043
1004	2865.96	17	0.0381185
1006	2866.01	17	0.0381866
1008	2866.06	17	0.0383148
1010	2866.11	17	0.0384386
1012	2866.16	17	0.0386203
1014	2866.21	17	0.0392109
1016	2866.26	17	0.0394791
1018	2866.31	17	0.0396266
1020	2866.36	17	0.0397483
1022	2866.41	17	0.0397935
1024	2866.46	17	0.0398014
1026	2866.51	17	0.0400025
1028	2866.56	17	0.040042
1030	2866.61	17	0.0400455
1032	2866.66	17	0.0400068
1034	2866.71	17	0.0400955
1036	2866.76	17	0.0400609
1038	2866.81	17	0.0399344
1040	2866.86	17	0.0401891
1042	2866.91	17	0.0399875
1044	2866.96	17	0.040251
1046	2867.01	17	0.0400275
1048	2867.06	17	0.0401601
1050	2867.11	17	0.040215
1052	2867.16	17	0.0402172
1054	2867.21	17	0.0399168
1056	2867.26	17	0.040222
1058	2867.31	17	0.0396973
1060	2867.36	17	0.0396411
1062	2867.41	17	0.0396433
1064	2867.46	17	0.0394989
1066	2867.51	17	0.0393193
1068	2867.56	17	0.0394115
1070	2867.61	17	0.0396868
1072	2867.66	17	0.0399537
1074	2867.71	17	0.0397882
1076	2867.76	17	0.0399893
1078	2867.81	17	0.039743
1080	2867.86	17	0.0398817
1082	2867.91	17	0.0397886
1084	2867.96	17	0.0396143
1086	2868.01	17	0.0395305
1088	2868.06	17	0.039206
1090	2868.11	17	0.0394594
1092	2868.16	17	0.0393184
1094	2868.21	17	0.0392943
1096	2868.26	17	0.0396139
1098	2868.31	17	0.0399388
1100	2868.36	17	0.0399528
1102	2868.41	17	0.0400209
1104	2868.46	17	0.0400508
1106	2868.51	17	0.0398119
1108	2868.56	17	0.0396692
1110	2868.61	17	0.0397742
1112	2868.66	17	0.0400389
1114	2868.71	17	0.0404459
1116	2868.76	17	0.0405473
1118	2868.81	17	0.0405579
1120	2868.86	17	0.0405829
1122	2868.91	17	0.0402483
1124	2868.96	17	0.0401342
1126	2869.01	17	0.0402378
1128	2869.06	17	0.0403291
1130	2869.11	17	0.0401118
1132	2869.16	17	0.0401899
1134	2869.21	17	0.0401649
1136	2869.26	17	0.0399744
1138	2869.31	17	0.0401245
1140	2869.36	17	0.0400749
1142	2869.41	17	0.04015
1144	2869.46	17	0.0401952
1146	2869.51	17	0.0400143
1148	2869.56	17	0.040139
1150	2869.61	17	0.0402334
1152	2869.66	17	0.040146
1154	2869.71	17	0.0401421
1156	2869.76	17	0.0403159
1158	2869.81	17	0.0401539
1160	2869.86	17	0.0401355
1162	2869.91	17	0.0403142
1164	2869.96	17	0.0400169
1166	2870.01	17	0.0400705
1168	2870.06	17	0.0401601
1170	2870.11	17	0.0401276
1172	2870.16	17	0.0400881
1174	2870.21	17	0.0400385
1176	2870.26	17	0.0400529
1178	2870.31	17	0.0399735
1180	2870.36	17	0.0401236
1182	2870.41	17	0.0401649
1184	2870.46	17	0.0400424
1186	2870.51	17	0.0400543
1188	2870.56	17	0.0399963
1190	2870.61	17	0.0403739
1192	2870.66	17	0.0403344
1194	2870.71	17	0.0400714
1196	2870.76	17	0.0400714
1198	2870.81	17	0.0399981
1200	2870.86	17	0.0398839
1202	2870.91	17	0.0398958
1204	2870.96	17	0.0399937
1206	2871.01	17	0.0399226
1208	2871.06	17	0.0399327
1210	2871.11	17	0.0399348
1212	2871.16	17	0.0398124
1214	2871.21	17	0.0400042
1216	2871.26	17	0.0397702
1218	2871.31	17	0.0398874
1220	2871.36	17	0.0398128
1222	2871.41	17	0.0398317
1224	2871.46	17	0.0399555
1226	2871.51	17	0.039847
1228	2871.56	17	0.0397671
1230	2871.61	17	0.039772
1232	2871.66	17	0.0396947
1234	2871.71	17	0.0396297
1236	2871.76	17	0.0394796
1238	2871.81	17	0.0395498
1240	2871.86	17	0.0394545
1242	2871.91	17	0.0395898
1244	2871.96	17	0.0398066
1246	2872.01	17	0.0398036
1248	2872.06	17	0.0399138
1250	2872.11	17	0.0399195
1252	2872.16	17	0.0398198
1254	2872.21	17	0.0400306
1256	2872.26	17	0.0401548
1258	2872.31	17	0.0399989
1260	2872.36	17	0.0401206
1262	2872.41	17	0.0399155
1264	2872.46	17	0.0398268
1266	2872.51	17	0.039988
1268	2872.56	17	0.0398633
1270	2872.61	17	0.0398317
1272	2872.66	17	0.0396609
1274	2872.71	17	0.0396714
1276	2872.76	17	0.0398088
1278	2872.81	17	0.039941
1280	2872.86	17	0.0400565
1282	2872.91	17	0.03997
1284	2872.96	17	0.040125
1286	2873.01	17	0.0400736
1288	2873.06	17	0.0399537
1290	2873.11	17	0.0400854
1292	2873.16	17	0.040067
1294	2873.21	17	0.0399871
1296	2873.26	17	0.0400508
1298	2873.31	17	0.0399586
1300	2873.36	17	0.0401526
1302	2873.41	17	0.0400872
1304	2873.46	17	0.0401386
1306	2873.51	17	0.0398734
1308	2873.56	17	0.0398378
1310	2873.61	17	0.0397983
1312	2873.66	17	0.0400178
1314	2873.71	17	0.039671
1316	2873.76	17	0.0398426
1318	2873.81	17	0.0398141
1320	2873.86	17	0.0398747
1322	2873.91	17	0.0399318
1324	2873.96	17	0.0401293
1326	2874.01	17	0.0400573
1328	2874.06	17	0.0400587
1330	2874.11	17	0.0400832
1332	2874.16	17	0.0400771
1334	2874.21	17	0.0401438
1336	2874.26	17	0.0401816
1338	2874.31	17	0.0401899
1340	2874.36	17	0.0399625
1342	2874.41	17	0.0398997
1344	2874.46	17	0.0396863
1346	2874.51	17	0.0398352
1348	2874.56	17	0.0396978
1350	2874.61	17	0.0397711
1352	2874.66	17	0.0397957
1354	2874.71	17	0.0400196
1356	2874.76	17	0.0396301
1358	2874.81	17	0.0396152
1360	2874.86	17	0.0394664
1362	2874.91	17	0.0396951
1364	2874.96	17	0.0396192
1366	2875.01	17	0.0397948
1368	2875.06	17	0.0399603
1370	2875.11	17	0.039934
1372	2875.16	17	0.0398181
1374	2875.21	17	0.0397557
1376	2875.26	17	0.0396978
1378	2875.31	17	0.039404
1380	2875.36	17	0.0395621
1382	2875.41	17	0.0397026
1384	2875.46	17	0.0395586
1386	2875.51	17	0.0392956
1388	2875.56	17	0.0392675
1390	2875.61	17	0.0393553
1392	2875.66	17	0.0392807
1394	2875.71	17	0.0391845
1396	2875.76	17	0.0389395
1398	2875.81	17	0.0392161
1400	2875.86	17	0.0392938
1402	2875.91	17	0.0391801
1404	2875.96	17	0.0390822
1406	2876.01	17	0.0391463
1408	2876.06	17	0.0391446
1410	2876.11	17	0.039458
1412	2876.16	17	0.0393913
1414	2876.21	17	0.0395305
1416	2876.26	17	0.0394444
1418	2876.31	17	0.0393369
1420	2876.36	17	0.0392741
1422	2876.41	17	0.039343
1424	2876.46	17	0.0394392
1426	2876.51	17	0.0396701
1428	2876.56	17	0.039833
1430	2876.61	17	0.0394493
1432	2876.66	17	0.0394945
1434	2876.71	17	0.0396802
1436	2876.76	17	0.0396266
1438	2876.81	17	0.0397281
1440	2876.86	17	0.0396069
1442	2876.91	17	0.0395568
1444	2876.96	17	0.0396363
1446	2877.01	17	0.039559
1448	2877.06	17	0.0394462
1450	2877.11	17	0.0396517
1452	2877.16	17	0.0395559
1454	2877.21	17	0.0394436
1456	2877.26	17	0.0395314
1458	2877.31	17	0.0396433
1460	2877.36	17	0.0396811
1462	2877.41	17	0.0397474
1464	2877.46	17	0.0397917
1466	2877.51	17	0.0397961
1468	2877.56	17	0.0398743
1470	2877.61	17	0.0398422
1472	2877.66	17	0.039923
1474	2877.71	17	0.0401372
1476	2877.76	17	0.0399726
1478	2877.81	17	0.0399774
1480	2877.86	17	0.0399063
1482	2877.91	17	0.0399168
1484	2877.96	17	0.0395805
1486	2878.01	17	0.0396407
1488	2878.06	17	0.039314
1490	2878.11	17	0.0395928
1492	2878.16	17	0.0399199
1494	2878.21	17	0.0400042
1496	2878.26	17	0.0401346
1498	2878.31	17	0.0397017
1500	2878.36	17	0.0395305
1502	2878.41	17	0.0393197
1504	2878.46	17	0.0391494
1506	2878.51	17	0.0387288
1508	2878.56	17	0.0386915
1510	2878.61	17	0.0387292
1512	2878.66	17	0.0387854
1514	2878.71	17	0.038972
1516	2878.76	17	0.0389114
1518	2878.81	17	0.0393707
1520	2878.86	17	0.0398097
1522	2878.91	17	0.0399362
1524	2878.96	17	0.0397548
1526	2879.01	17	0.0397632
1528	2879.06	17	0.0397013
1530	2879.11	17	0.0397254
1532	2879.16	17	0.0398352
1534	2879.21	17	0.0396806
1536	2879.26	17	0.0396912
1538	2879.31	17	0.0397957
1540	2879.36	17	0.0397206
1542	2879.41	17	0.0397364
1544	2879.46	17	0.0397026
1546	2879.51	17	0.0395349
1548	2879.56	17	0.0395985
1550	2879.61	17	0.0396657
1552	2879.66	17	0.039779
1554	2879.71	17	0.0398422
1556	2879.76	17	0.0397816
1558	2879.81	17	0.0396877
1560	2879.86	17	0.0397368
1562	2879.91	17	0.0396297
1564	2879.96	17	0.0397509
1566	2880.01	17	0.0398119
1568	2880.06	17	0.0397465
1570	2880.11	17	0.039829
1572	2880.16	17	0.039833
1574	2880.21	17	0.0396719
1576	2880.26	17	0.0397821
1578	2880.31	17	0.0398049
1580	2880.36	17	0.0397895
1582	2880.41	17	0.0398549
1584	2880.46	17	0.0397579
1586	2880.51	17	0.039912
1588	2880.56	17	0.0399006
1590	2880.61	17	0.0399392
1592	2880.66	17	0.0397461
1594	2880.71	17	0.0397557
1596	2880.76	17	0.0396736
1598	2880.81	17	0.0395696
1600	2880.86	17	0.0396877
1602	2880.91	17	0.0393571
1604	2880.96	17	0.0395933
1606	2881.01	17	0.0398277
1608	2881.06	17	0.039934
1610	2881.11	17	0.0401184
1612	2881.16	17	0.0401219
1614	2881.21	17	0.0400253
1616	2881.26	17	0.0401869
1618	2881.31	17	0.0401689
1620	2881.36	17	0.040326
1622	2881.41	17	0.0400099
1624	2881.46	17	0.0398712
1626	2881.51	17	0.0397645
1628	2881.56	17	0.0398685
1630	2881.61	17	0.0397663
1632	2881.66	17	0.0398505
1634	2881.71	17	0.0398927
1636	2881.76	17	0.0400262
1638	2881.81	17	0.0399182
1640	2881.86	17	0.0398945
1642	2881.91	17	0.0397496
1644	2881.96	17	0.0396877
1646	2882.01	17	0.039808
1648	2882.06	17	0.0396179
1650	2882.11	17	0.0396657
1652	2882.16	17	0.039707
1654	2882.21	17	0.039534
1656	2882.26	17	0.0396591
1658	2882.31	17	0.039599
1660	2882.36	17	0.0395489
1662	2882.41	17	0.0398962
1664	2882.46	17	0.0398479
1666	2882.51	17	0.0399976
1668	2882.56	17	0.0399537
1670	2882.61	17	0.0399037
1672	2882.66	17	0.0396833
1674	2882.71	17	0.0396262
1676	2882.76	17	0.0393816
1678	2882.81	17	0.0393698
1680	2882.86	17	0.0392815
1682	2882.91	17	0.0393988
1684	2882.96	17	0.0393316
1686	2883.01	17	0.039631
1688	2883.06	17	0.0395169
1690	2883.11	17	0.0396675
1692	2883.16	17	0.0396073
1694	2883.21	17	0.0396534
1696	2883.26	17	0.0397619
1698	2883.31	17	0.0399006
1700	2883.36	17	0.0399621
1702	2883.41	17	0.0399195
1704	2883.46	17	0.0398027
1706	2883.51	17	0.0399085
1708	2883.56	17	0.0397368
1710	2883.61	17	0.0396275
1712	2883.66	17	0.0396007
1714	2883.71	17	0.0396135
1716	2883.76	17	0.0396108
1718	2883.81	17	0.0394624
1720	2883.86	17	0.0396266
1722	2883.91	17	0.0395634
1724	2883.96	17	0.0397583
1726	2884.01	17	0.0398953
1728	2884.06	17	0.0397241
1730	2884.11	17	0.0397465
1732	2884.16	17	0.0398633
1734	2884.21	17	0.0396385
1736	2884.26	17	0.0396363
1738	2884.31	17	0.0394207
1740	2884.36	17	0.0395691
1742	2884.41	17	0.0395358
1744	2884.46	17	0.0395652
1746	2884.51	17	0.0395753
1748	2884.56	17	0.0395182
1750	2884.61	17	0.0395186
1752	2884.66	17	0.0394888
1754	2884.71	17	0.0393553
1756	2884.76	17	0.0394225
1758	2884.81	17	0.0396332
1760	2884.86	17	0.0396697
1762	2884.91	17	0.0396705
1764	2884.96	17	0.0395634
1766	2885.01	17	0.0395814
1768	2885.06	17	0.0393619
1770	2885.11	17	0.0393518
1772	2885.16	17	0.0393584
1774	2885.21	17	0.0395849
1776	2885.26	17	0.0394695
1778	2885.31	17	0.039203
1780	2885.36	17	0.0394857
1782	2885.41	17	0.0392908
1784	2885.46	17	0.039239
1786	2885.51	17	0.0392772
1788	2885.56	17	0.0393988
1790	2885.61	17	0.0391283
1792	2885.66	17	0.0394326
1794	2885.71	17	0.0393957
1796	2885.76	17	0.0394295
1798	2885.81	17	0.0395296
1800	2885.86	17	0.0396508
1802	2885.91	17	0.0396429
1804	2885.96	17	0.0395911
1806	2886.01	17	0.0394176
1808	2886.06	17	0.0392921
1810	2886.11	17	0.0392416
1812	2886.16	17	0.0393755
1814	2886.21	17	0.0391902
1816	2886.26	17	0.0391182
1818	2886.31	17	0.0388096
1820	2886.36	17	0.0388047
1822	2886.41	17	0.0386985
1824	2886.46	17	0.038979
1826	2886.51	17	0.0389685
1828	2886.56	17	0.0391463
1830	2886.61	17	0.0390427
1832	2886.66	17	0.0392188
1834	2886.71	17	0.0392442
1836	2886.76	17	0.0393114
1838	2886.81	17	0.039397
1840	2886.86	17	0.0393694
1842	2886.91	17	0.0393167
1844	2886.96	17	0.0392271
1846	2887.01	17	0.0387604
1848	2887.06	17	0.0387586
1850	2887.11	17	0.0383863
1852	2887.16	17	0.0384048
1854	2887.21	17	0.038587
1856	2887.26	17	0.0386963
1858	2887.31	17	0.0391573
1860	2887.36	17	0.0390563
1862	2887.41	17	0.0386572
1864	2887.46	17	0.0386028
1866	2887.51	17	0.0383604
1868	2887.56	17	0.0386893
1870	2887.61	17	0.03912
1872	2887.66	17	0.039437
1874	2887.71	17	0.0394681
1876	2887.76	17	0.0394585
1878	2887.81	17	0.0390941
1880	2887.86	17	0.0389606
1882	2887.91	17	0.0388987
1884	2887.96	17	0.0388702
1886	2888.01	17	0.0385084
1888	2888.06	17	0.038846
1890	2888.11	17	0.0390216
1892	2888.16	17	0.0391797
1894	2888.21	17	0.0392087
1896	2888.26	17	0.0391832
1898	2888.31	17	0.038875
1900	2888.36	17	0.0390611
1902	2888.41	17	0.0389944
1904	2888.46	17	0.0389026
1906	2888.51	17	0.0386713
1908	2888.56	17	0.0387499
1910	2888.61	17	0.0387156
1912	2888.66	17	0.0387564
1914	2888.71	17	0.0387643
1916	2888.76	17	0.038889
1918	2888.81	17	0.038688
1920	2888.86	17	0.0387859
1922	2888.91	17	0.038738
1924	2888.96	17	0.0388917
1926	2889.01	17	0.0390493
1928	2889.06	17	0.0391279
1930	2889.11	17	0.0390124
1932	2889.16	17	0.0388552
1934	2889.21	17	0.0389927
1936	2889.26	17	0.0387815
1938	2889.31	17	0.0388464
1940	2889.36	17	0.0390528
1942	2889.41	17	0.0390172
1944	2889.46	17	0.0390598
1946	2889.51	17	0.0390414
1948	2889.56	17	0.0389294
1950	2889.61	17	0.038853
1952	2889.66	17	0.0390265
1954	2889.71	17	0.0387336
1956	2889.76	17	0.0389681
1958	2889.81	17	0.0389935
1960	2889.86	17	0.0388368
1962	2889.91	17	0.0387709
1964	2889.96	17	0.038864
1966	2890.01	17	0.0385396
1968	2890.06	17	0.0387121
1970	2890.11	17	0.0383306
1972	2890.16	17	0.0385747
1974	2890.21	17	0.0393966
1976	2890.26	17	0.03903
1978	2890.31	17	0.0386743
1980	2890.36	17	0.0388008
1982	2890.41	17	0.0387152
1984	2890.46	17	0.0387016
1986	2890.51	17	0.0387762
1988	2890.56	17	0.0386717
1990	2890.61	17	0.0385536
1992	2890.66	17	0.0384495
1994	2890.71	17	0.0386967
1996	2890.76	17	0.038594
1998	2890.81	17	0.0388666
2000	2890.86	17	0.0388544
2002	2890.91	17	0.0389022
2004	2890.96	17	0.0389127
2006	2891.01	17	0.0389439
2008	2891.06	17	0.0389373
2010	2891.11	17	0.0389808
2012	2891.16	17	0.0395529
2014	2891.21	17	0.0396591
2016	2891.26	17	0.0398606
2018	2891.31	17	0.0394984
2020	2891.36	17	0.0394708
2022	2891.41	17	0.0391169
2024	2891.46	17	0.0391709
2026	2891.51	17	0.0390475
2028	2891.56	17	0.0390971
2030	2891.61	17	0.0388908
2032	2891.66	17	0.0387661
2034	2891.71	17	0.0388912
2036	2891.76	17	0.0387968
2038	2891.81	17	0.0389966
2040	2891.86	17	0.0390611
2042	2891.91	17	0.0390199
2044	2891.96	17	0.0388592
2046	2892.01	17	0.0389808
2048	2892.06	17	0.0387859
2050	2892.11	17	0.0389672
2052	2892.16	17	0.0388456
2054	2892.21	17	0.0387995
2056	2892.26	17	0.0388925
2058	2892.31	17	0.0388658
2060	2892.36	17	0.0387292
2062	2892.41	17	0.0388096
2064	2892.46	17	0.0385409
2066	2892.51	17	0.0386247
2068	2892.56	17	0.0385347
2070	2892.61	17	0.0386717
2072	2892.66	17	0.0387736
2074	2892.71	17	0.0387143
2076	2892.76	17	0.0387446
2078	2892.81	17	0.0388644
2080	2892.86	17	0.0387828
2082	2892.91	17	0.0388666
2084	2892.96	17	0.0386519
2086	2893.01	17	0.0387187
2088	2893.06	17	0.0388337
2090	2893.11	17	0.0387881
2092	2893.16	17	0.0389878
2094	2893.21	17	0.039239
2096	2893.26	17	0.0391485
2098	2893.31	17	0.038814
2100	2893.36	17	0.0390396
2102	2893.41	17	0.038691
2104	2893.46	17	0.0391112
2106	2893.51	17	0.0391116
2108	2893.56	17	0.0391582
2110	2893.61	17	0.0390493
2112	2893.66	17	0.0392596
2114	2893.71	17	0.0395713
2116	2893.76	17	0.0396798
2118	2893.81	17	0.0397579
2120	2893.86	17	0.0394664
2122	2893.91	17	0.0394813
2124	2893.96	17	0.039444
2126	2894.01	17	0.0391551
2128	2894.06	17	0.0392196
2130	2894.11	17	0.0389312
2132	2894.16	17	0.0390598
2134	2894.21	17	0.0391507
2136	2894.26	17	0.0393342
2138	2894.31	17	0.0392477
2140	2894.36	17	0.0393874
2142	2894.41	17	0.039379
2144	2894.46	17	0.0392842
2146	2894.51	17	0.0393777
2148	2894.56	17	0.0393391
2150	2894.61	17	0.0393992
2152	2894.66	17	0.039318
2154	2894.71	17	0.0394286
2156	2894.76	17	0.0394769
2158	2894.81	17	0.0392811
2160	2894.86	17	0.0395406
2162	2894.91	17	0.03944
2164	2894.96	17	0.039455
2166	2895.01	17	0.0396692
2168	2895.06	17	0.0396359
2170	2895.11	17	0.0394159
2172	2895.16	17	0.0393136
2174	2895.21	17	0.0391555
2176	2895.26	17	0.0390137
2178	2895.31	17	0.0394339
2180	2895.36	17	0.0394115
2182	2895.41	17	0.0394128
2184	2895.46	17	0.0394457
2186	2895.51	17	0.0393153
2188	2895.56	17	0.039386
2190	2895.61	17	0.039149
2192	2895.66	17	0.0392916
2194	2895.71	17	0.0392741
2196	2895.76	17	0.039314
2198	2895.81	17	0.0391942
2200	2895.86	17	0.0393847
2202	2895.91	17	0.0394712
2204	2895.96	17	0.0394286
2206	2896.01	17	0.0392855
2208	2896.06	17	0.0391898
2210	2896.11	17	0.0390058
2212	2896.16	17	0.0390743
2214	2896.21	17	0.0383859
2216	2896.26	17	0.039275
2218	2896.31	17	0.0394712
2220	2896.36	17	0.0397281
2222	2896.41	17	0.0396108
2224	2896.46	17	0.0393917
2226	2896.51	17	0.0392943
2228	2896.56	17	0.0391498
2230	2896.61	17	0.0389483
2232	2896.66	17	0.0389593
2234	2896.71	17	0.0389632
2236	2896.76	17	0.0389531
2238	2896.81	17	0.0393417
2240	2896.86	17	0.0393149
2242	2896.91	17	0.0393641
2244	2896.96	17	0.0391876
2246	2897.01	17	0.0392412
2248	2897.06	17	0.0390453
2250	2897.11	17	0.0392499
2252	2897.16	17	0.0394172
2254	2897.21	17	0.0391226
2256	2897.26	17	0.0391819
2258	2897.31	17	0.0389075
2260	2897.36	17	0.0391784
2262	2897.41	17	0.0392785
2264	2897.46	17	0.039311
2266	2897.51	17	0.0391981
2268	2897.56	17	0.0390401
2270	2897.61	17	0.0393057
2272	2897.66	17	0.0390734
2274	2897.71	17	0.0388702
2276	2897.76	17	0.038875
2278	2897.81	17	0.0388794
2280	2897.86	17	0.0392205
2282	2897.91	17	0.0389202
2284	2897.96	17	0.0389676
2286	2898.01	17	0.0389992
2288	2898.06	17	0.0390273
2290	2898.11	17	0.0390181
2292	2898.16	17	0.0390203
2294	2898.21	17	0.0390502
2296	2898.26	17	0.0389847
2298	2898.31	17	0.0390532
2300	2898.36	17	0.0390445
2302	2898.41	17	0.0389733
2304	2898.46	17	0.0391406
2306	2898.51	17	0.0391156
2308	2898.56	17	0.0391481
2310	2898.61	17	0.0395094
2312	2898.66	17	0.0398088
2314	2898.71	17	0.0396556
2316	2898.76	17	0.0396723
2318	2898.81	17	0.0397083
2320	2898.86	17	0.0393953
2322	2898.91	17	0.0395296
2324	2898.96	17	0.0396306
2326	2899.01	17	0.0394554
2328	2899.06	17	0.0394062
2330	2899.11	17	0.0394611
2332	2899.16	17	0.039069
2334	2899.21	17	0.0391191
2336	2899.26	17	0.0391485
2338	2899.31	17	0.0392157
2340	2899.36	17	0.0390976
2342	2899.41	17	0.0387657
2344	2899.46	17	0.0389602
2346	2899.51	17	0.0386098
2348	2899.56	17	0.0388315
2350	2899.61	17	0.0387174
2352	2899.66	17	0.0386361
2354	2899.71	17	0.0389681
2356	2899.76	17	0.0392289
2358	2899.81	17	0.0391481
2360	2899.86	17	0.0392003
2362	2899.91	17	0.0390923
2364	2899.96	17	0.039098
2366	2900.01	17	0.038958
2368	2900.06	17	0.0391252
2370	2900.11	17	0.0390756
2372	2900.16	17	0.0391648
2374	2900.21	17	0.0391533
2376	2900.26	17	0.0391371
2378	2900.31	17	0.0390993
2380	2900.36	17	0.0392627
2382	2900.41	17	0.0390954
2384	2900.46	17	0.039289
2386	2900.51	17	0.0392341
2388	2900.56	17	0.0392675
2390	2900.61	17	0.0392539
2392	2900.66	17	0.0393808
2394	2900.71	17	0.0392332
2396	2900.76	17	0.0389466
2398	2900.81	17	0.0390181
2400	2900.86	17	0.0387354
2402	2900.91	17	0.0388644
2404	2900.96	17	0.0388061
2406	2901.01	17	0.0387951
2408	2901.06	17	0.0394299
2410	2901.11	17	0.0395261
2412	2901.16	17	0.0395006
2414	2901.21	17	0.0394018
2416	2901.26	17	0.0390668
2418	2901.31	17	0.0389606
2420	2901.36	17	0.0389804
2422	2901.41	17	0.0389847
2424	2901.46	17	0.0386274
2426	2901.51	17	0.0387349
2428	2901.56	17	0.0386129
2430	2901.61	17	0.0385966
2432	2901.66	17	0.0388693
2434	2901.71	17	0.0389786
2436	2901.76	17	0.038943
2438	2901.81	17	0.0387863
2440	2901.86	17	0.0388104
2442	2901.91	17	0.0388855
2444	2901.96	17	0.0388232
2446	2902.01	17	0.0388249
2448	2902.06	17	0.0388482
2450	2902.11	17	0.0387832
2452	2902.16	17	0.038882
2454	2902.21	17	0.0388486
2456	2902.26	17	0.0388504
2458	2902.31	17	0.0389984
2460	2902.36	17	0.0392113
2462	2902.41	17	0.0391257
2464	2902.46	17	0.0389698
2466	2902.51	17	0.0389632
2468	2902.56	17	0.0391617
2470	2902.61	17	0.0390045
2472	2902.66	17	0.0390892
2474	2902.71	17	0.0389891
2476	2902.76	17	0.0389264
2478	2902.81	17	0.0393909
2480	2902.86	17	0.0391331
2482	2902.91	17	0.0389782
2484	2902.96	17	0.0387521
2486	2903.01	17	0.0387437
2488	2903.06	17	0.0385821
2490	2903.11	17	0.0388737
2492	2903.16	17	0.0389782
2494	2903.21	17	0.0392223
2496	2903.26	17	0.0393606
2498	2903.31	17	0.0393812
2500	2903.36	17	0.0390339
2502	2903.41	17	0.0393237
2504	2903.46	17	0.038886
2506	2903.51	17	0.0389373
2508	2903.56	17	0.039149
2510	2903.61	17	0.0391832
2512	2903.66	17	0.0391599
2514	2903.71	17	0.0392438
2516	2903.76	17	0.0390866
2518	2903.81	17	0.0390963
2520	2903.86	17	0.0390172
2522	2903.91	17	0.0390339
2524	2903.96	17	0.0389206
2526	2904.01	17	0.0389149
2528	2904.06	17	0.0389141
2530	2904.11	17	0.0388328
2532	2904.16	17	0.0390168
2534	2904.21	17	0.0388631
2536	2904.26	17	0.0388724
2538	2904.31	17	0.0390317
2540	2904.36	17	0.0387881
2542	2904.41	17	0.0387152
2544	2904.46	17	0.0385396
2546	2904.51	17	0.0388443
2548	2904.56	17	0.039134
2550	2904.61	17	0.0391612
2552	2904.66	17	0.0389466
2554	2904.71	17	0.0391459
2556	2904.76	17	0.0390563
2558	2904.81	17	0.039048
2560	2904.86	17	0.0392706
2562	2904.91	17	0.0391015
2564	2904.96	17	0.0389654
2566	2905.01	17	0.0391257
2568	2905.06	17	0.0393325
2570	2905.11	17	0.0390985
2572	2905.16	17	0.0390897
2574	2905.21	17	0.0387547
2576	2905.26	17	0.038936
2578	2905.31	17	0.0387371
2580	2905.36	17	0.0389694
2582	2905.41	17	0.0386195
2584	2905.46	17	0.0389764
2586	2905.51	17	0.0388179
2588	2905.56	17	0.0388223
2590	2905.61	17	0.0391143
2592	2905.66	17	0.0392469
2594	2905.71	17	0.0394738
2596	2905.76	17	0.0393904
2598	2905.81	17	0.0393702
2600	2905.86	17	0.0395213
2602	2905.91	17	0.0393957
2604	2905.96	17	0.0391481
2606	2906.01	17	0.0392179
2608	2906.06	17	0.0390945
2610	2906.11	17	0.0388882
2612	2906.16	17	0.0388899
2614	2906.21	17	0.0390014
2616	2906.26	17	0.0389606
2618	2906.31	17	0.039037
2620	2906.36	17	0.0390796
2622	2906.41	17	0.0390673
2624	2906.46	17	0.0392245
2626	2906.51	17	0.0391929
2628	2906.56	17	0.0390159
2630	2906.61	17	0.0390554
2632	2906.66	17	0.0389566
2634	2906.71	17	0.0390418
2636	2906.76	17	0.0390225
2638	2906.81	17	0.0390572
2640	2906.86	17	0.0389843
2642	2906.91	17	0.0390866
2644	2906.96	17	0.0389694
2646	2907.01	17	0.0390976
2648	2907.06	17	0.0391898
2650	2907.11	17	0.0390546
2652	2907.16	17	0.0391709
2654	2907.21	17	0.0392679
2656	2907.26	17	0.039163
2658	2907.31	17	0.0392131
2660	2907.36	17	0.0393237
2662	2907.41	17	0.0392034
2664	2907.46	17	0.0392675
2666	2907.51	17	0.0392363
2668	2907.56	17	0.0390093
2670	2907.61	17	0.039105
2672	2907.66	17	0.0392842
2674	2907.71	17	0.0390361
2676	2907.76	17	0.0391165
2678	2907.81	17	0.0391753
2680	2907.86	17	0.038922
2682	2907.91	17	0.0392258
2684	2907.96	17	0.0390901
2686	2908.01	17	0.0390396
2688	2908.06	17	0.0392131
2690	2908.11	17	0.0392122
2692	2908.16	17	0.0390857
2694	2908.21	17	0.0390756
2696	2908.26	17	0.0391108
2698	2908.31	17	0.0392267
2700	2908.36	17	0.039131
2702	2908.41	17	0.0391204
2704	2908.46	17	0.0391375
2706	2908.51	17	0.0392315
2708	2908.56	17	0.0390739
2710	2908.61	17	0.0391828
2712	2908.66	17	0.0392719
2714	2908.71	17	0.0390142
2716	2908.76	17	0.0390721
2718	2908.81	17	0.0390234
2720	2908.86	17	0.0389856
2722	2908.91	17	0.0391358
2724	2908.96	17	0.0390963
2726	2909.01	17	0.0390458
2728	2909.06	17	0.0393127
2730	2909.11	17	0.0390589
2732	2909.16	17	0.0390467
2734	2909.21	17	0.0390475
2736	2909.26	17	0.0390229
2738	2909.31	17	0.0392144
2740	2909.36	17	0.0391691
2742	2909.41	17	0.0391551
2744	2909.46	17	0.0391068
2746	2909.51	17	0.0391507
2748	2909.56	17	0.0390906
2750	2909.61	17	0.0390546
2752	2909.66	17	0.0390752
2754	2909.71	17	0.0390506
2756	2909.76	17	0.0391661
2758	2909.81	17	0.0392306
2760	2909.86	17	0.039167
2762	2909.91	17	0.0392363
2764	2909.96	17	0.0391656
2766	2910.01	17	0.0390313
2768	2910.06	17	0.039152
2770	2910.11	17	0.0390405
2772	2910.16	17	0.0390524
2774	2910.21	17	0.0389281
2776	2910.26	17	0.0388065
2778	2910.31	17	0.039062
2780	2910.36	17	0.0390743
2782	2910.41	17	0.038868
2784	2910.46	17	0.0389351
2786	2910.51	17	0.038871
2788	2910.56	17	0.0388605
2790	2910.61	17	0.0387964
2792	2910.66	17	0.0387556
2794	2910.71	17	0.0386792
2796	2910.76	17	0.0387393
2798	2910.81	17	0.0387907
2800	2910.86	17	0.0384355
2802	2910.91	17	0.0386304
2804	2910.96	17	0.038468
2806	2911.01	17	0.0386111
2808	2911.06	17	0.0386414
2810	2911.11	17	0.0386072
2812	2911.16	17	0.0386792
2814	2911.21	17	0.0387139
2816	2911.26	17	0.0388381
2818	2911.31	17	0.0387815
2820	2911.36	17	0.038608
2822	2911.41	17	0.0385286
2824	2911.46	17	0.0384254
2826	2911.51	17	0.0384399
2828	2911.56	17	0.0384482
2830	2911.61	17	0.0384737
2832	2911.66	17	0.0385312
2834	2911.71	17	0.0386054
2836	2911.76	17	0.0388017
2838	2911.81	17	0.0387648
2840	2911.86	17	0.0386357
2842	2911.91	17	0.0386945
2844	2911.96	17	0.0387775
2846	2912.01	17	0.0387736
2848	2912.06	17	0.0388741
2850	2912.11	17	0.0387235
2852	2912.16	17	0.0388987
2854	2912.21	17	0.0388614
2856	2912.26	17	0.0387165
2858	2912.31	17	0.0387907
2860	2912.36	17	0.0388996
2862	2912.41	17	0.0387806
2864	2912.46	17	0.0387854
2866	2912.51	17	0.0387867
2868	2912.56	17	0.0387174
2870	2912.61	17	0.0388833
2872	2912.66	17	0.0388096
2874	2912.71	17	0.0387837
2876	2912.76	17	0.0389264
2878	2912.81	17	0.0388807
2880	2912.86	17	0.0388504
2882	2912.91	17	0.0389215
2884	2912.96	17	0.0388557
2886	2913.01	17	0.0389444
2888	2913.06	17	0.0389176
2890	2913.11	17	0.0389242
2892	2913.16	17	0.0389755
2894	2913.21	17	0.0388855
2896	2913.26	17	0.0389571
2898	2913.31	17	0.0390256
2900	2913.36	17	0.0389097
2902	2913.41	17	0.0389053
2904	2913.46	17	0.0386555
2906	2913.51	17	0.0387314
2908	2913.56	17	0.0387806
2910	2913.61	17	0.0385659
2912	2913.66	17	0.0386405
2914	2913.71	17	0.0388192
2916	2913.76	17	0.03859
2918	2913.81	17	0.0383077
2920	2913.86	17	0.0381602
2922	2913.91	17	0.0382739
2924	2913.96	17	0.03827
2926	2914.01	17	0.0384215
2928	2914.06	17	0.03836
2930	2914.11	17	0.0385014
2932	2914.16	17	0.038569
2934	2914.21	17	0.0384649
2936	2914.26	17	0.0384474
2938	2914.31	17	0.0384307
2940	2914.36	17	0.038493
2942	2914.41	17	0.0385769
2944	2914.46	17	0.0385549
2946	2914.51	17	0.0384456
2948	2914.56	17	0.0385813
2950	2914.61	17	0.0384438
2952	2914.66	17	0.0385751
2954	2914.71	17	0.0386427
2956	2914.76	17	0.0385637
2958	2914.81	17	0.0385883
2960	2914.86	17	0.0385536
2962	2914.91	17	0.0386133
2964	2914.96	17	0.038702
2966	2915.01	17	0.0386366
2968	2915.06	17	0.0387007
2970	2915.11	17	0.0386568
2972	2915.16	17	0.038698
2974	2915.21	17	0.03867
2976	2915.26	17	0.0386989
2978	2915.31	17	0.0386866
2980	2915.36	17	0.0386757
2982	2915.41	17	0.0387103
2984	2915.46	17	0.0386322
2986	2915.51	17	0.038572
2988	2915.56	17	0.0386195
2990	2915.61	17	0.038601
2992	2915.66	17	0.0386041
2994	2915.71	17	0.0385404
2996	2915.76	17	0.0385097
2998	2915.81	17	0.0385343
3000	2915.86	17	0.038637
3002	2915.91	17	0.0385237
3004	2915.96	17	0.038486
3006	2916.01	17	0.0385483
3008	2916.06	17	0.0385523
3010	2916.11	17	0.0386331
3012	2916.16	17	0.0386243
3014	2916.21	17	0.0386168
3016	2916.26	17	0.0386651
3018	2916.31	17	0.0385703
3020	2916.36	17	0.038641
3022	2916.41	17	0.0384311
3024	2916.46	17	0.0384676
3026	2916.51	17	0.0386072
3028	2916.56	17	0.0385444
3030	2916.61	17	0.0386361
3032	2916.66	17	0.0389123
3034	2916.71	17	0.0389338
3036	2916.76	17	0.038875
3038	2916.81	17	0.0386989
3040	2916.86	17	0.0387191
3042	2916.91	17	0.0384719
3044	2916.96	17	0.0384746
3046	2917.01	17	0.0386173
3048	2917.06	17	0.0387038
3050	2917.11	17	0.0388737
3052	2917.16	17	0.0387714
3054	2917.21	17	0.0388443
3056	2917.26	17	0.0389979
3058	2917.31	17	0.0387736
3060	2917.36	17	0.0388478
3062	2917.41	17	0.0387538
3064	2917.46	17	0.038533
3066	2917.51	17	0.0386915
3068	2917.56	17	0.0385988
3070	2917.61	17	0.0387701
3072	2917.66	17	0.0387354
3074	2917.71	17	0.038731
3076	2917.76	17	0.0388767
3078	2917.81	17	0.0386906
3080	2917.86	17	0.0387007
3082	2917.91	17	0.0387977
3084	2917.96	17	0.0387468
3086	2918.01	17	0.0388403
3088	2918.06	17	0.0387327
3090	2918.11	17	0.0386923
3092	2918.16	17	0.038817
3094	2918.21	17	0.0388021
3096	2918.26	17	0.0388781
3098	2918.31	17	0.0389211
3100	2918.36	17	0.0387973
3102	2918.41	17	0.0387551
3104	2918.46	17	0.0389084
3106	2918.51	17	0.0387578
3108	2918.56	17	0.0388192
3110	2918.61	17	0.038904
3112	2918.66	17	0.0387257
3114	2918.71	17	0.0387591
3116	2918.76	17	0.0387793
3118	2918.81	17	0.038551
3120	2918.86	17	0.0386256
3122	2918.91	17	0.0385299
3124	2918.96	17	0.0383411
3126	2919.01	17	0.0385795
3128	2919.06	17	0.0385374
3130	2919.11	17	0.0385466
3132	2919.16	17	0.0385589
3134	2919.21	17	0.0384882
3136	2919.26	17	0.0385154
3138	2919.31	17	0.0384891
3140	2919.36	17	0.0385321
3142	2919.41	17	0.0386331
3144	2919.46	17	0.0385628
3146	2919.51	17	0.0385154
3148	2919.56	17	0.0384561
3150	2919.61	17	0.038551
3152	2919.66	17	0.0384952
3154	2919.71	17	0.0385843
3156	2919.76	17	0.0385786
3158	2919.81	17	0.0386748
3160	2919.86	17	0.0386875
3162	2919.91	17	0.0385163
3164	2919.96	17	0.0386085
3166	2920.01	17	0.0386721
3168	2920.06	17	0.038742
3170	2920.11	17	0.0388012
3172	2920.16	17	0.0388702
3174	2920.21	17	0.0388324
3176	2920.26	17	0.0387705
3178	2920.31	17	0.0385707
3180	2920.36	17	0.0385971
3182	2920.41	17	0.0386138
3184	2920.46	17	0.0384509
3186	2920.51	17	0.0385716
3188	2920.56	17	0.0384443
3190	2920.61	17	0.0383486
3192	2920.66	17	0.0384092
3194	2920.71	17	0.0384983
3196	2920.76	17	0.0384184
3198	2920.81	17	0.0386361
3200	2920.86	17	0.0388298
3202	2920.91	17	0.0386612
3204	2920.96	17	0.0387095
3206	2921.01	17	0.0385093
3208	2921.06	17	0.0385606
3210	2921.11	17	0.0383516
3212	2921.16	17	0.0384579
3214	2921.21	17	0.0382673
3216	2921.26	17	0.0385084
3218	2921.31	17	0.0382968
3220	2921.36	17	0.0384324
3222	2921.41	17	0.0382063
3224	2921.46	17	0.0382463
3226	2921.51	17	0.0381427
3228	2921.56	17	0.038248
3230	2921.61	17	0.0384329
3232	2921.66	17	0.0384926
3234	2921.71	17	0.0382757
3236	2921.76	17	0.0379657
3238	2921.81	17	0.0379324
3240	2921.86	17	0.0378006
3242	2921.91	17	0.0383143
3244	2921.96	17	0.0384438
3246	2922.01	17	0.0383512
3248	2922.06	17	0.0384807
3250	2922.11	17	0.038659
3252	2922.16	17	0.0384184
3254	2922.21	17	0.0385242
3256	2922.26	17	0.038443
3258	2922.31	17	0.0384759
3260	2922.36	17	0.038439
3262	2922.41	17	0.0384337
3264	2922.46	17	0.0380803
3266	2922.51	17	0.0383859
3268	2922.56	17	0.0379315
3270	2922.61	17	0.0381668
3272	2922.66	17	0.0380421
3274	2922.71	17	0.0381168
3276	2922.76	17	0.0381866
3278	2922.81	17	0.0383187
3280	2922.86	17	0.0382441
3282	2922.91	17	0.0383477
3284	2922.96	17	0.0380768
3286	2923.01	17	0.038072
3288	2923.06	17	0.0382436
3290	2923.11	17	0.0381062
3292	2923.16	17	0.0381672
3294	2923.21	17	0.0380408
3296	2923.26	17	0.0380346
3298	2923.31	17	0.0377251
3300	2923.36	17	0.0378906
3302	2923.41	17	0.0379539
3304	2923.46	17	0.0380224
3306	2923.51	17	0.0381655
3308	2923.56	17	0.0380206
3310	2923.61	17	0.0381361
3312	2923.66	17	0.0382116
3314	2923.71	17	0.0380175
3316	2923.76	17	0.0381462
3318	2923.81	17	0.038061
3320	2923.86	17	0.0376786
3322	2923.91	17	0.0376193
3324	2923.96	17	0.0374195
3326	2924.01	17	0.0375315
3328	2924.06	17	0.0381027
3330	2924.11	17	0.0382318
3332	2924.16	17	0.0385141
3334	2924.21	17	0.0379012
3336	2924.26	17	0.0377282
3338	2924.31	17	0.0376215
3340	2924.36	17	0.0376707
3342	2924.41	17	0.0375074
3344	2924.46	17	0.0375052
3346	2924.51	17	0.0374099
3348	2924.56	17	0.0377084
3350	2924.61	17	0.0377585
3352	2924.66	17	0.0382454
3354	2924.71	17	0.0379885
3356	2924.76	17	0.0377032
3358	2924.81	17	0.0375161
3360	2924.86	17	0.0374797
3362	2924.91	17	0.037373
3364	2924.96	17	0.0372365
3366	2925.01	17	0.036959
3368	2925.06	17	0.0371091
3370	2925.11	17	0.0370038
3372	2925.16	17	0.0371987
3374	2925.21	17	0.0373392
3376	2925.26	17	0.0375074
3378	2925.31	17	0.0379574
3380	2925.36	17	0.0380623
3382	2925.41	17	0.0381075
3384	2925.46	17	0.0380974
3386	2925.51	17	0.0384531
3388	2925.56	17	0.0382436
3390	2925.61	17	0.0381664
3392	2925.66	17	0.0379433
3394	2925.71	17	0.0381326
3396	2925.76	17	0.0378889
3398	2925.81	17	0.0383218
3400	2925.86	17	0.0382221
3402	2925.91	17	0.0384474
3404	2925.96	17	0.0384289
3406	2926.01	17	0.0384553
3408	2926.06	17	0.0384526
3410	2926.11	17	0.0382151
3412	2926.16	17	0.0382063
3414	2926.21	17	0.0382796
3416	2926.26	17	0.0385694
3418	2926.31	17	0.0383617
3420	2926.36	17	0.038428
3422	2926.41	17	0.0382924
3424	2926.46	17	0.0381747
3426	2926.51	17	0.0381194
3428	2926.56	17	0.0378735
3430	2926.61	17	0.0378248
3432	2926.66	17	0.0375701
3434	2926.71	17	0.0375412
3436	2926.76	17	0.0375807
3438	2926.81	17	0.0373313
3440	2926.86	17	0.0373418
3442	2926.91	17	0.0372944
3444	2926.96	17	0.0373445
3446	2927.01	17	0.0371184
3448	2927.06	17	0.0367939
3450	2927.11	17	0.0368909
3452	2927.16	17	0.0367869
3454	2927.21	17	0.037153
3456	2927.26	17	0.0379561
3458	2927.31	17	0.0380052
3460	2927.36	17	0.0379894
3462	2927.41	17	0.0380101
3464	2927.46	17	0.0379561
3466	2927.51	17	0.0376759
3468	2927.56	17	0.0376246
3470	2927.61	17	0.0375706
3472	2927.66	17	0.037186
3474	2927.71	17	0.0371127
3476	2927.76	17	0.0370806
3478	2927.81	17	0.0371539
3480	2927.86	17	0.0372316
3482	2927.91	17	0.0373216
3484	2927.96	17	0.0371605
3486	2928.01	17	0.0372979
3488	2928.06	17	0.0373234
3490	2928.11	17	0.038
3492	2928.16	17	0.0382542
3494	2928.21	17	0.0384658
3496	2928.26	17	0.0384504
3498	2928.31	17	0.0382616
3500	2928.36	17	0.0382002
3502	2928.41	17	0.0379921
3504	2928.46	17	0.037787
3506	2928.51	17	0.0378608
3508	2928.56	17	0.0377668
3510	2928.61	17	0.0376461
3512	2928.66	17	0.0377203
3514	2928.71	17	0.0375693
3516	2928.76	17	0.0374986
3518	2928.81	17	0.0377717
3520	2928.86	17	0.0376716
3522	2928.91	17	0.0380004
3524	2928.96	17	0.0380887
3526	2929.01	17	0.0380733
3528	2929.06	17	0.0378696
3530	2929.11	17	0.0381124
3532	2929.16	17	0.0378788
3534	2929.21	17	0.0380158
3536	2929.26	17	0.0381211
3538	2929.31	17	0.0379986
3540	2929.36	17	0.037989
3542	2929.41	17	0.0377572
3544	2929.46	17	0.0379231
3546	2929.51	17	0.0379091
3548	2929.56	17	0.0380035
3550	2929.61	17	0.0379806
3552	2929.66	17	0.0380342
3554	2929.71	17	0.0382673
3556	2929.76	17	0.0380184
3558	2929.81	17	0.0382103
3560	2929.86	17	0.0383556
3562	2929.91	17	0.0381514
3564	2929.96	17	0.0381598
3566	2930.01	17	0.0381822
3568	2930.06	17	0.0382041
3570	2930.11	17	0.0381686
3572	2930.16	17	0.0381997
3574	2930.21	17	0.0382608
3576	2930.26	17	0.0383679
3578	2930.31	17	0.0382766
3580	2930.36	17	0.0382774
3582	2930.41	17	0.0381356
3584	2930.46	17	0.0381479
3586	2930.51	17	0.0381071
3588	2930.56	17	0.0380044
3590	2930.61	17	0.0377444
3592	2930.66	17	0.0377374
3594	2930.71	17	0.0377321
3596	2930.76	17	0.0378252
3598	2930.81	17	0.0378863
3600	2930.86	17	0.0377493
3602	2930.91	17	0.0375385
3604	2930.96	17	0.0376975
3606	2931.01	17	0.0376334
3608	2931.06	17	0.0377014
3610	2931.11	17	0.0379534
3612	2931.16	17	0.0379161
3614	2931.21	17	0.0380522
3616	2931.26	17	0.0378142
3618	2931.31	17	0.0378292
3620	2931.36	17	0.0377295
3622	2931.41	17	0.0376378
3624	2931.46	17	0.0374722
3626	2931.51	17	0.037492
3628	2931.56	17	0.0373879
3630	2931.61	17	0.0376623
3632	2931.66	17	0.037679
3634	2931.71	17	0.0378494
3636	2931.76	17	0.0377747
3638	2931.81	17	0.0375104
3640	2931.86	17	0.0375183
3642	2931.91	17	0.0380399
3644	2931.96	17	0.0382261
3646	2932.01	17	0.0382682
3648	2932.06	17	0.0382278
3650	2932.11	17	0.0383617
3652	2932.16	17	0.0381229
3654	2932.21	17	0.0380105
3656	2932.26	17	0.0380149
3658	2932.31	17	0.0379701
3660	2932.36	17	0.0379411
3662	2932.41	17	0.0379464
3664	2932.46	17	0.0379398
3666	2932.51	17	0.0380952
3668	2932.56	17	0.0380878
3670	2932.61	17	0.0380641
3672	2932.66	17	0.0382283
3674	2932.71	17	0.0385804
3676	2932.76	17	0.0383117
3678	2932.81	17	0.0382309
3680	2932.86	17	0.0382226
3682	2932.91	17	0.0380197
3684	2932.96	17	0.0380333
3686	2933.01	17	0.0380816
3688	2933.06	17	0.0380355
3690	2933.11	17	0.0380531
3692	2933.16	17	0.0380057
3694	2933.21	17	0.0379446
3696	2933.26	17	0.0379837
3698	2933.31	17	0.0379631
3700	2933.36	17	0.0379837
3702	2933.41	17	0.0381137
3704	2933.46	17	0.0381923
3706	2933.51	17	0.0381883
3708	2933.56	17	0.0382463
3710	2933.61	17	0.0381185
3712	2933.66	17	0.0381809
3714	2933.71	17	0.0382081
3716	2933.76	17	0.0380882
3718	2933.81	17	0.0379877
3720	2933.86	17	0.0381062
3722	2933.91	17	0.0381146
3724	2933.96	17	0.0380022
3726	2934.01	17	0.0381844
3728	2934.06	17	0.0381826
3730	2934.11	17	0.0381023
3732	2934.16	17	0.0380658
3734	2934.21	17	0.0381023
3736	2934.26	17	0.0380952
3738	2934.31	17	0.0381492
3740	2934.36	17	0.0381633
3742	2934.41	17	0.0379442
3744	2934.46	17	0.0380092
3746	2934.51	17	0.0379758
3748	2934.56	17	0.0379139
3750	2934.61	17	0.0378963
3752	2934.66	17	0.0376975
3754	2934.71	17	0.0376316
3756	2934.76	17	0.0375543
3758	2934.81	17	0.0374064
3760	2934.86	17	0.0374441
3762	2934.91	17	0.0371904
3764	2934.96	17	0.0369555
3766	2935.01	17	0.0370152
3768	2935.06	17	0.0372738
3770	2935.11	17	0.03747
3772	2935.16	17	0.0375403
3774	2935.21	17	0.0375688
3776	2935.26	17	0.0377286
3778	2935.31	17	0.0377181
3780	2935.36	17	0.037769
3782	2935.41	17	0.0376009
3784	2935.46	17	0.0373734
3786	2935.51	17	0.0373633
3788	2935.56	17	0.0375297
3790	2935.61	17	0.0377076
3792	2935.66	17	0.0377076
3794	2935.71	17	0.0377747
3796	2935.76	17	0.037773
3798	2935.81	17	0.0378204
3800	2935.86	17	0.0376031
3802	2935.91	17	0.0376118
3804	2935.96	17	0.0372114
3806	2936.01	17	0.0373524
3808	2936.06	17	0.0371412
3810	2936.11	17	0.0374863
3812	2936.16	17	0.0372338
3814	2936.21	17	0.0378955
3816	2936.26	17	0.0377146
3818	2936.31	17	0.0373629
3820	2936.36	17	0.0370942
3822	2936.41	17	0.0370565
3824	2936.46	17	0.0369954
3826	2936.51	17	0.0370112
3828	2936.56	17	0.0367439
3830	2936.61	17	0.0372009
3832	2936.66	17	0.0371697
3834	2936.71	17	0.0368593
3836	2936.76	17	0.0367355
3838	2936.81	17	0.0370867
3840	2936.86	17	0.0371811
3842	2936.91	17	0.0375412
3844	2936.96	17	0.0376184
3846	2937.01	17	0.0375139
3848	2937.06	17	0.0376527
3850	2937.11	17	0.0379174
3852	2937.16	17	0.0379021
3854	2937.21	17	0.0376799
3856	2937.26	17	0.0372031
3858	2937.31	17	0.0373335
3860	2937.36	17	0.0374446
3862	2937.41	17	0.0374345
3864	2937.46	17	0.0374099
3866	2937.51	17	0.0369959
3868	2937.56	17	0.037344
3870	2937.61	17	0.0371192
3872	2937.66	17	0.0372514
3874	2937.71	17	0.0373712
3876	2937.76	17	0.0372294
3878	2937.81	17	0.0371069
3880	2937.86	17	0.037009
3882	2937.91	17	0.037096
3884	2937.96	17	0.0370376
3886	2938.01	17	0.0373383
3888	2938.06	17	0.0367478
3890	2938.11	17	0.0377032
3892	2938.16	17	0.0375938
3894	2938.21	17	0.0377396
3896	2938.26	17	0.0376531
3898	2938.31	17	0.0378191
3900	2938.36	17	0.0378015
3902	2938.41	17	0.0379495
3904	2938.46	17	0.0376579
3906	2938.51	17	0.0375917
3908	2938.56	17	0.0376588
3910	2938.61	17	0.037625
3912	2938.66	17	0.0375952
3914	2938.71	17	0.0377923
3916	2938.76	17	0.0379082
3918	2938.81	17	0.0377708
3920	2938.86	17	0.0379416
3922	2938.91	17	0.0377879
3924	2938.96	17	0.0377796
3926	2939.01	17	0.037949
3928	2939.06	17	0.0377782
3930	2939.11	17	0.0377681
3932	2939.16	17	0.0379047
3934	2939.21	17	0.0379258
3936	2939.26	17	0.0379569
3938	2939.31	17	0.0378432
3940	2939.36	17	0.0379003
3942	2939.41	17	0.0378046
3944	2939.46	17	0.0379934
3946	2939.51	17	0.0377923
3948	2939.56	17	0.0377493
3950	2939.61	17	0.0378906
3952	2939.66	17	0.0378546
3954	2939.71	17	0.0376997
3956	2939.76	17	0.037845
3958	2939.81	17	0.0377646
3960	2939.86	17	0.0377787
3962	2939.91	17	0.0378854
3964	2939.96	17	0.0379095
3966	2940.01	17	0.0378432
3968	2940.06	17	0.037895
3970	2940.11	17	0.037791
3972	2940.16	17	0.0378362
3974	2940.21	17	0.0378006
3976	2940.26	17	0.0377348
3978	2940.31	17	0.0375034
3980	2940.36	17	0.0375311
3982	2940.41	17	0.0370213
3984	2940.46	17	0.0372861
3986	2940.51	17	0.0375912
3988	2940.56	17	0.0374933
3990	2940.61	17	0.0375434
3992	2940.66	17	0.0377958
3994	2940.71	17	0.0378331
3996	2940.76	17	0.0379297
3998	2940.81	17	0.0379306
[truncated: 34,004 more rows]

## Sheet: Mouse 3_470
FrameCounter	Timestamp	Flags	Region0G
1	2840.89	18	0.0910237
3	2840.94	18	0.0867588
5	2840.99	18	0.0872483
7	2841.04	18	0.0832758
9	2841.09	18	0.0823916
11	2841.14	18	0.0814296
13	2841.19	18	0.0809357
15	2841.24	18	0.0799584
17	2841.29	18	0.0794947
19	2841.34	18	0.0784748
21	2841.39	18	0.0778523
23	2841.44	18	0.0780995
25	2841.49	18	0.0777991
27	2841.54	18	0.0775449
29	2841.59	18	0.0780872
31	2841.64	18	0.078423
33	2841.69	18	0.0774554
35	2841.74	18	0.076313
37	2841.79	18	0.0761334
39	2841.84	18	0.07605
41	2841.89	18	0.0766769
43	2841.94	18	0.0767235
45	2841.99	18	0.077094
47	2842.04	18	0.0763736
49	2842.09	18	0.0770119
51	2842.14	18	0.0771436
53	2842.19	18	0.0768987
55	2842.24	18	0.0769285
57	2842.29	18	0.0773908
59	2842.34	18	0.0769825
61	2842.39	18	0.0777781
63	2842.44	18	0.0777794
65	2842.49	18	0.0780775
67	2842.54	18	0.0781684
69	2842.59	18	0.0782685
71	2842.64	18	0.0776376
73	2842.69	18	0.0779388
75	2842.74	18	0.0778053
77	2842.79	18	0.077426
79	2842.84	18	0.077505
81	2842.89	18	0.077426
83	2842.94	18	0.0781517
85	2842.99	18	0.0780152
87	2843.04	18	0.0775212
89	2843.09	18	0.0767836
91	2843.14	18	0.0768275
93	2843.19	18	0.0772999
95	2843.24	18	0.0772565
97	2843.29	18	0.0777601
99	2843.34	18	0.0768196
101	2843.39	18	0.0773237
103	2843.44	18	0.0766642
105	2843.49	18	0.0764227
107	2843.54	18	0.0765364
109	2843.59	18	0.0764644
111	2843.64	18	0.0770396
113	2843.69	18	0.0770576
115	2843.74	18	0.0778874
117	2843.79	18	0.0779085
119	2843.84	18	0.078175
121	2843.89	18	0.0781543
123	2843.94	18	0.0790131
125	2843.99	18	0.0784292
127	2844.04	18	0.0777368
129	2844.09	18	0.0773232
131	2844.14	18	0.0770615
133	2844.19	18	0.0770321
135	2844.24	18	0.0765707
137	2844.29	18	0.0762348
139	2844.34	18	0.0766774
141	2844.39	18	0.0766379
143	2844.44	18	0.0782237
145	2844.49	18	0.0776604
147	2844.54	18	0.0774782
149	2844.59	18	0.0771235
151	2844.64	18	0.0769527
153	2844.69	18	0.0769136
155	2844.74	18	0.0773671
157	2844.79	18	0.0767784
159	2844.84	18	0.0762783
161	2844.89	18	0.0767375
163	2844.94	18	0.0777943
165	2844.99	18	0.0785868
167	2845.04	18	0.078693
169	2845.09	18	0.077789
171	2845.14	18	0.0781653
173	2845.19	18	0.0779019
175	2845.24	18	0.0782694
177	2845.29	18	0.0784625
179	2845.34	18	0.0782672
181	2845.39	18	0.0787326
183	2845.44	18	0.0784415
185	2845.49	18	0.0776898
187	2845.54	18	0.077804
189	2845.59	18	0.0773759
191	2845.64	18	0.0779682
193	2845.69	18	0.0784261
195	2845.74	18	0.0788002
197	2845.79	18	0.0780094
199	2845.84	18	0.0783045
201	2845.89	18	0.0799461
203	2845.94	18	0.081272
205	2845.99	18	0.0818876
207	2846.04	18	0.0824623
209	2846.09	18	0.0816983
211	2846.14	18	0.0811583
213	2846.19	18	0.0805067
215	2846.24	18	0.0802986
217	2846.29	18	0.0804866
219	2846.34	18	0.0801072
221	2846.39	18	0.0790013
223	2846.44	18	0.0794135
225	2846.49	18	0.0797481
227	2846.54	18	0.0801779
229	2846.59	18	0.0801849
231	2846.64	18	0.0798166
233	2846.69	18	0.0796159
235	2846.74	18	0.0792195
237	2846.79	18	0.0794328
239	2846.84	18	0.0790509
241	2846.89	18	0.0794886
243	2846.94	18	0.0792533
245	2846.99	18	0.0791233
247	2847.04	18	0.0790513
249	2847.09	18	0.0789196
251	2847.14	18	0.0786649
253	2847.19	18	0.0787431
255	2847.24	18	0.0781855
257	2847.29	18	0.0780902
259	2847.34	18	0.0780156
261	2847.39	18	0.0779813
263	2847.44	18	0.077008
265	2847.49	18	0.0778202
267	2847.54	18	0.0775256
269	2847.59	18	0.0773583
271	2847.64	18	0.0770146
273	2847.69	18	0.0760513
275	2847.74	18	0.0755082
277	2847.79	18	0.074995
279	2847.84	18	0.0752948
281	2847.89	18	0.074984
283	2847.94	18	0.0748281
285	2847.99	18	0.0743491
287	2848.04	18	0.0740975
289	2848.09	18	0.0746367
291	2848.14	18	0.0745682
293	2848.19	18	0.074256
295	2848.24	18	0.0744936
297	2848.29	18	0.074584
299	2848.34	18	0.0744703
301	2848.39	18	0.0754156
303	2848.44	18	0.0756153
305	2848.49	18	0.0761532
307	2848.54	18	0.0765303
309	2848.59	18	0.0765992
311	2848.64	18	0.0767252
313	2848.69	18	0.0765114
315	2848.74	18	0.0762326
317	2848.79	18	0.0760741
319	2848.84	18	0.0766273
321	2848.89	18	0.0766638
323	2848.94	18	0.0766427
325	2848.99	18	0.0765883
327	2849.04	18	0.0768108
329	2849.09	18	0.0766528
331	2849.14	18	0.0762634
333	2849.19	18	0.0763986
335	2849.24	18	0.0765474
337	2849.29	18	0.0762625
339	2849.34	18	0.0755789
341	2849.39	18	0.0751534
343	2849.44	18	0.0746253
345	2849.49	18	0.0742407
347	2849.54	18	0.0741796
349	2849.59	18	0.0737213
351	2849.64	18	0.0738868
353	2849.69	18	0.0734859
355	2849.74	18	0.0737393
357	2849.79	18	0.0736734
359	2849.84	18	0.0741313
361	2849.89	18	0.0735255
363	2849.94	18	0.0733683
365	2849.99	18	0.073313
367	2850.04	18	0.0730825
369	2850.09	18	0.0727764
371	2850.14	18	0.0724783
373	2850.19	18	0.0719286
375	2850.24	18	0.0717653
377	2850.29	18	0.0715739
379	2850.34	18	0.0713394
381	2850.39	18	0.0713706
383	2850.44	18	0.0710501
385	2850.49	18	0.0707125
387	2850.54	18	0.0705487
389	2850.59	18	0.0704394
391	2850.64	18	0.0701466
393	2850.69	18	0.0701106
395	2850.74	18	0.0701246
397	2850.79	18	0.0699604
399	2850.84	18	0.0698405
401	2850.89	18	0.0695429
403	2850.94	18	0.0690046
405	2850.99	18	0.0690762
407	2851.04	18	0.0687785
409	2851.09	18	0.0684615
411	2851.14	18	0.0687284
413	2851.19	18	0.0686187
415	2851.24	18	0.0691187
417	2851.29	18	0.0690775
419	2851.34	18	0.0682038
421	2851.39	18	0.0681067
423	2851.44	18	0.067568
425	2851.49	18	0.0678947
427	2851.54	18	0.0678459
429	2851.59	18	0.0687306
431	2851.64	18	0.0682793
433	2851.69	18	0.0688013
435	2851.74	18	0.068933
437	2851.79	18	0.0687543
439	2851.84	18	0.0691706
441	2851.89	18	0.0688277
443	2851.94	18	0.0684597
445	2851.99	18	0.0683127
447	2852.04	18	0.0689796
449	2852.09	18	0.0684935
451	2852.14	18	0.0693879
453	2852.19	18	0.069992
455	2852.24	18	0.0704429
457	2852.29	18	0.0708648
459	2852.34	18	0.0710185
461	2852.39	18	0.0707981
463	2852.44	18	0.0706835
465	2852.49	18	0.0709232
467	2852.54	18	0.07108
469	2852.59	18	0.0713895
471	2852.64	18	0.0714734
473	2852.69	18	0.0714979
475	2852.74	18	0.0715476
477	2852.79	18	0.0716863
479	2852.84	18	0.0717908
481	2852.89	18	0.0718163
483	2852.94	18	0.0716165
485	2852.99	18	0.0719054
487	2853.04	18	0.0723233
489	2853.09	18	0.0722562
491	2853.14	18	0.072326
493	2853.19	18	0.0730535
495	2853.24	18	0.0728945
497	2853.29	18	0.0730223
499	2853.34	18	0.0729854
501	2853.39	18	0.0726245
503	2853.44	18	0.0723861
505	2853.49	18	0.0720674
507	2853.54	18	0.0718088
509	2853.59	18	0.0724761
511	2853.64	18	0.0726263
513	2853.69	18	0.0728384
515	2853.74	18	0.0725073
517	2853.79	18	0.0729406
519	2853.84	18	0.072416
521	2853.89	18	0.0725661
523	2853.94	18	0.0726136
525	2853.99	18	0.073554
527	2854.04	18	0.0730012
529	2854.09	18	0.0728054
531	2854.14	18	0.0727519
533	2854.19	18	0.0724858
535	2854.24	18	0.0727207
537	2854.29	18	0.072567
539	2854.34	18	0.0728089
541	2854.39	18	0.0725793
543	2854.44	18	0.0730416
545	2854.49	18	0.0731422
547	2854.54	18	0.0724937
549	2854.59	18	0.0721047
551	2854.64	18	0.0721504
553	2854.69	18	0.0720028
555	2854.74	18	0.0713267
557	2854.79	18	0.071411
559	2854.84	18	0.0710453
561	2854.89	18	0.071667
563	2854.94	18	0.0711133
565	2854.99	18	0.0714316
567	2855.04	18	0.0717219
569	2855.09	18	0.0721025
571	2855.14	18	0.0730298
573	2855.19	18	0.0733749
575	2855.24	18	0.0731641
577	2855.29	18	0.073086
579	2855.34	18	0.0728809
581	2855.39	18	0.071984
583	2855.44	18	0.0716696
585	2855.49	18	0.0712328
587	2855.54	18	0.0714944
589	2855.59	18	0.0709531
591	2855.64	18	0.0713447
593	2855.69	18	0.0706124
595	2855.74	18	0.0708846
597	2855.79	18	0.0706932
599	2855.84	18	0.0709395
601	2855.89	18	0.0706901
603	2855.94	18	0.0710229
605	2855.99	18	0.0704969
607	2856.04	18	0.070968
609	2856.09	18	0.070529
611	2856.14	18	0.0707243
613	2856.19	18	0.0706914
615	2856.24	18	0.0709706
617	2856.29	18	0.0706234
619	2856.34	18	0.0706927
621	2856.39	18	0.0699718
623	2856.44	18	0.0702958
625	2856.49	18	0.0709263
627	2856.54	18	0.0712134
629	2856.59	18	0.0711024
631	2856.64	18	0.0712745
633	2856.69	18	0.0708486
635	2856.74	18	0.0714755
637	2856.79	18	0.0724199
639	2856.84	18	0.0724498
641	2856.89	18	0.072513
643	2856.94	18	0.0726158
645	2856.99	18	0.0716569
647	2857.04	18	0.0721126
649	2857.09	18	0.0725877
651	2857.14	18	0.0729841
653	2857.19	18	0.0727044
655	2857.24	18	0.0725503
657	2857.29	18	0.0722228
659	2857.34	18	0.071969
661	2857.39	18	0.0724498
663	2857.44	18	0.0722768
665	2857.49	18	0.0726597
667	2857.54	18	0.0731005
669	2857.59	18	0.0735083
671	2857.64	18	0.0734535
673	2857.69	18	0.0730113
675	2857.74	18	0.0729832
677	2857.79	18	0.072841
679	2857.84	18	0.0723541
681	2857.89	18	0.0724568
683	2857.94	18	0.0728146
685	2857.99	18	0.0729415
687	2858.04	18	0.0725697
689	2858.09	18	0.0725661
691	2858.14	18	0.072531
693	2858.19	18	0.0722175
695	2858.24	18	0.0722377
697	2858.29	18	0.0718189
699	2858.34	18	0.0713566
701	2858.39	18	0.0722276
703	2858.44	18	0.0735303
705	2858.49	18	0.0742683
707	2858.54	18	0.0734688
709	2858.59	18	0.0729705
711	2858.64	18	0.0724423
713	2858.69	18	0.0726965
715	2858.74	18	0.0726171
717	2858.79	18	0.0734693
719	2858.84	18	0.0728805
721	2858.89	18	0.0723488
723	2858.94	18	0.0722162
725	2858.99	18	0.0733674
727	2859.04	18	0.0734548
729	2859.09	18	0.0738122
731	2859.14	18	0.0737476
733	2859.19	18	0.074411
735	2859.24	18	0.0743772
737	2859.29	18	0.0739197
739	2859.34	18	0.0748575
741	2859.39	18	0.0753638
743	2859.44	18	0.0747842
745	2859.49	18	0.0741041
747	2859.54	18	0.073799
749	2859.59	18	0.0742894
751	2859.64	18	0.0749774
753	2859.69	18	0.0755385
755	2859.74	18	0.0749941
757	2859.79	18	0.0746591
759	2859.84	18	0.0747236
761	2859.89	18	0.075088
763	2859.94	18	0.0746327
765	2859.99	18	0.0750595
767	2860.04	18	0.075193
769	2860.09	18	0.0751745
771	2860.14	18	0.0748079
773	2860.19	18	0.0750828
775	2860.24	18	0.0744268
777	2860.29	18	0.0748307
779	2860.34	18	0.074166
781	2860.39	18	0.0748619
783	2860.44	18	0.0745941
785	2860.49	18	0.0743535
787	2860.54	18	0.0748588
789	2860.59	18	0.0750792
791	2860.64	18	0.0765566
793	2860.69	18	0.0769663
795	2860.74	18	0.0770813
797	2860.79	18	0.0774931
799	2860.84	18	0.0777346
801	2860.89	18	0.0783163
803	2860.94	18	0.0784994
805	2860.99	18	0.078841
807	2861.04	18	0.0790043
809	2861.09	18	0.0787277
811	2861.14	18	0.0780815
813	2861.19	18	0.0777416
815	2861.24	18	0.077447
817	2861.29	18	0.0767173
819	2861.34	18	0.0774589
821	2861.39	18	0.0781144
823	2861.44	18	0.0779032
825	2861.49	18	0.0774966
827	2861.54	18	0.0764816
829	2861.59	18	0.0769882
831	2861.64	18	0.0763336
833	2861.69	18	0.0765566
835	2861.74	18	0.0773566
837	2861.79	18	0.0774712
839	2861.84	18	0.0772925
841	2861.89	18	0.0771823
843	2861.94	18	0.0768899
845	2861.99	18	0.0761343
847	2862.04	18	0.0764434
849	2862.09	18	0.0766295
851	2862.14	18	0.0765817
853	2862.19	18	0.0761773
855	2862.24	18	0.0761022
857	2862.29	18	0.0759885
859	2862.34	18	0.0764851
861	2862.39	18	0.0759551
863	2862.44	18	0.0758735
865	2862.49	18	0.0763182
867	2862.54	18	0.0758046
869	2862.59	18	0.0758388
871	2862.64	18	0.0756166
873	2862.69	18	0.0756289
875	2862.74	18	0.074991
877	2862.79	18	0.0749642
879	2862.84	18	0.0746323
881	2862.89	18	0.0747425
883	2862.94	18	0.0749475
885	2862.99	18	0.0746657
887	2863.04	18	0.0744036
889	2863.09	18	0.074771
891	2863.14	18	0.0741305
893	2863.19	18	0.0739838
895	2863.24	18	0.0738912
897	2863.29	18	0.0740444
899	2863.34	18	0.0739707
901	2863.39	18	0.0738297
903	2863.44	18	0.0730798
905	2863.49	18	0.0736796
907	2863.54	18	0.0734324
909	2863.59	18	0.0728524
911	2863.64	18	0.073039
913	2863.69	18	0.0734034
915	2863.74	18	0.0724876
917	2863.79	18	0.0724507
919	2863.84	18	0.0721649
921	2863.89	18	0.0721455
923	2863.94	18	0.0719638
925	2863.99	18	0.0719554
927	2864.04	18	0.0717978
929	2864.09	18	0.0719247
931	2864.14	18	0.0717855
933	2864.19	18	0.0716147
935	2864.24	18	0.071242
937	2864.29	18	0.0711059
939	2864.34	18	0.0708938
941	2864.39	18	0.0714558
943	2864.44	18	0.0708091
945	2864.49	18	0.0708903
947	2864.54	18	0.0705031
949	2864.59	18	0.0709013
951	2864.64	18	0.070867
953	2864.69	18	0.0713171
955	2864.74	18	0.0721214
957	2864.79	18	0.0725538
959	2864.84	18	0.0726254
961	2864.89	18	0.0719181
963	2864.94	18	0.0709386
965	2864.99	18	0.0709338
967	2865.04	18	0.0706567
969	2865.09	18	0.0708372
971	2865.14	18	0.0708275
973	2865.19	18	0.0710909
975	2865.24	18	0.0713241
977	2865.29	18	0.0719888
979	2865.34	18	0.0723273
981	2865.39	18	0.071948
983	2865.44	18	0.071418
985	2865.49	18	0.0709
987	2865.54	18	0.0707814
989	2865.59	18	0.0721574
991	2865.64	18	0.0719295
993	2865.69	18	0.0711634
995	2865.74	18	0.0697615
997	2865.79	18	0.0684523
999	2865.84	18	0.0678609
1001	2865.89	18	0.0679592
1003	2865.94	18	0.0683355
1005	2865.99	18	0.0692382
1007	2866.04	18	0.0697813
1009	2866.09	18	0.0698502
1011	2866.14	18	0.070125
1013	2866.19	18	0.0715432
1015	2866.24	18	0.0728032
1017	2866.29	18	0.0732941
1019	2866.34	18	0.0737143
1021	2866.39	18	0.0736897
1023	2866.44	18	0.0738648
1025	2866.49	18	0.0739851
1027	2866.54	18	0.0737634
1029	2866.59	18	0.0737296
1031	2866.64	18	0.0730113
1033	2866.69	18	0.0728585
1035	2866.74	18	0.0734609
1037	2866.79	18	0.0731628
1039	2866.84	18	0.0730996
1041	2866.89	18	0.0734693
1043	2866.94	18	0.072711
1045	2866.99	18	0.073107
1047	2867.04	18	0.0728704
1049	2867.09	18	0.0736927
1051	2867.14	18	0.0732849
1053	2867.19	18	0.0734982
1055	2867.24	18	0.072747
1057	2867.29	18	0.072848
1059	2867.34	18	0.0724331
1061	2867.39	18	0.0724388
1063	2867.44	18	0.0725885
1065	2867.49	18	0.0722114
1067	2867.54	18	0.0726518
1069	2867.59	18	0.0730596
1071	2867.64	18	0.0748426
1073	2867.69	18	0.0743272
1075	2867.74	18	0.075002
1077	2867.79	18	0.0752307
1079	2867.84	18	0.0750086
1081	2867.89	18	0.0747061
1083	2867.94	18	0.0745704
1085	2867.99	18	0.0736221
1087	2868.04	18	0.072095
1089	2868.09	18	0.0726298
1091	2868.14	18	0.0724112
1093	2868.19	18	0.0718716
1095	2868.24	18	0.072409
1097	2868.29	18	0.0732669
1099	2868.34	18	0.0737757
1101	2868.39	18	0.0740892
1103	2868.44	18	0.0738003
1105	2868.49	18	0.0735562
1107	2868.54	18	0.0733108
1109	2868.59	18	0.0732638
1111	2868.64	18	0.0733665
1113	2868.69	18	0.0745704
1115	2868.74	18	0.0744466
1117	2868.79	18	0.0746442
1119	2868.84	18	0.0747385
1121	2868.89	18	0.0739232
1123	2868.94	18	0.073255
1125	2868.99	18	0.0729982
1127	2869.04	18	0.0729349
1129	2869.09	18	0.0726465
1131	2869.14	18	0.0725209
1133	2869.19	18	0.0727242
1135	2869.24	18	0.0721174
1137	2869.29	18	0.0718804
1139	2869.34	18	0.0721965
1141	2869.39	18	0.0718176
1143	2869.44	18	0.0721087
1145	2869.49	18	0.0715195
1147	2869.54	18	0.0714791
1149	2869.59	18	0.0713109
1151	2869.64	18	0.0712389
1153	2869.69	18	0.0713184
1155	2869.74	18	0.0711946
1157	2869.79	18	0.0707221
1159	2869.84	18	0.0705061
1161	2869.89	18	0.0702423
1163	2869.94	18	0.0700271
1165	2869.99	18	0.0696847
1167	2870.04	18	0.0699635
1169	2870.09	18	0.0698594
1171	2870.14	18	0.0700693
1173	2870.19	18	0.069751
1175	2870.24	18	0.0695688
1177	2870.29	18	0.0694805
1179	2870.34	18	0.0690568
1181	2870.39	18	0.0689677
1183	2870.44	18	0.068948
1185	2870.49	18	0.0692188
1187	2870.54	18	0.0697338
1189	2870.59	18	0.0702137
1191	2870.64	18	0.0708249
1193	2870.69	18	0.0703591
1195	2870.74	18	0.0699551
1197	2870.79	18	0.0696298
1199	2870.84	18	0.0697224
1201	2870.89	18	0.069603
1203	2870.94	18	0.069852
1205	2870.99	18	0.069895
1207	2871.04	18	0.069733
1209	2871.09	18	0.0696935
1211	2871.14	18	0.0699073
1213	2871.19	18	0.0696232
1215	2871.24	18	0.0694818
1217	2871.29	18	0.0694322
1219	2871.34	18	0.0693528
1221	2871.39	18	0.0692979
1223	2871.44	18	0.0696605
1225	2871.49	18	0.0697115
1227	2871.54	18	0.0693181
1229	2871.59	18	0.0691802
1231	2871.64	18	0.0689897
1233	2871.69	18	0.0686362
1235	2871.74	18	0.0688097
1237	2871.79	18	0.0684198
1239	2871.84	18	0.068292
1241	2871.89	18	0.0683034
1243	2871.94	18	0.0686999
1245	2871.99	18	0.0683895
1247	2872.04	18	0.0685072
1249	2872.09	18	0.0679364
1251	2872.14	18	0.0682556
1253	2872.19	18	0.0681866
1255	2872.24	18	0.0681331
1257	2872.29	18	0.0678798
1259	2872.34	18	0.067597
1261	2872.39	18	0.06755
1263	2872.44	18	0.0671746
1265	2872.49	18	0.0673696
1267	2872.54	18	0.0674811
1269	2872.59	18	0.0677735
1271	2872.64	18	0.0675167
1273	2872.69	18	0.067212
1275	2872.74	18	0.0679021
1277	2872.79	18	0.0683838
1279	2872.84	18	0.0687574
1281	2872.89	18	0.0689585
1283	2872.94	18	0.0689054
1285	2872.99	18	0.0687873
1287	2873.04	18	0.0691802
1289	2873.09	18	0.0693128
1291	2873.14	18	0.0694801
1293	2873.19	18	0.0697826
1295	2873.24	18	0.0701593
1297	2873.29	18	0.0702322
1299	2873.34	18	0.0707063
1301	2873.39	18	0.0703323
1303	2873.44	18	0.0702875
1305	2873.49	18	0.0703674
1307	2873.54	18	0.0697694
1309	2873.59	18	0.0700188
1311	2873.64	18	0.0704398
1313	2873.69	18	0.0699608
1315	2873.74	18	0.0700741
1317	2873.79	18	0.0699723
1319	2873.84	18	0.0700895
1321	2873.89	18	0.0701417
1323	2873.94	18	0.0703863
1325	2873.99	18	0.0700912
1327	2874.04	18	0.0703248
1329	2874.09	18	0.0700377
1331	2874.14	18	0.0701329
1333	2874.19	18	0.0705579
1335	2874.24	18	0.0706185
1337	2874.29	18	0.0706119
1339	2874.34	18	0.0706163
1341	2874.39	18	0.0701413
1343	2874.44	18	0.0700583
1345	2874.49	18	0.0702471
1347	2874.54	18	0.0699024
1349	2874.59	18	0.0703516
1351	2874.64	18	0.0700135
1353	2874.69	18	0.070032
1355	2874.74	18	0.0693765
1357	2874.79	18	0.0687587
1359	2874.84	18	0.0681397
1361	2874.89	18	0.0683974
1363	2874.94	18	0.0683377
1365	2874.99	18	0.0687899
1367	2875.04	18	0.0694647
1369	2875.09	18	0.0690937
1371	2875.14	18	0.0688435
1373	2875.19	18	0.0686692
1375	2875.24	18	0.0688294
1377	2875.29	18	0.0680163
1379	2875.34	18	0.0682666
1381	2875.39	18	0.0681981
1383	2875.44	18	0.0683904
1385	2875.49	18	0.0680795
1387	2875.54	18	0.0673819
1389	2875.59	18	0.0676159
1391	2875.64	18	0.0675421
1393	2875.69	18	0.0672734
1395	2875.74	18	0.066491
1397	2875.79	18	0.0672185
1399	2875.84	18	0.067856
1401	2875.89	18	0.068134
1403	2875.94	18	0.0677278
1405	2875.99	18	0.0675913
1407	2876.04	18	0.0676839
1409	2876.09	18	0.0680466
1411	2876.14	18	0.0684075
1413	2876.19	18	0.0688259
1415	2876.24	18	0.0691798
1417	2876.29	18	0.0687965
1419	2876.34	18	0.069358
1421	2876.39	18	0.0696711
1423	2876.44	18	0.0702888
1425	2876.49	18	0.0707568
1427	2876.54	18	0.0713904
1429	2876.59	18	0.0714567
1431	2876.64	18	0.0710532
1433	2876.69	18	0.0711085
1435	2876.74	18	0.0711366
1437	2876.79	18	0.0715638
1439	2876.84	18	0.0718602
1441	2876.89	18	0.0716038
1443	2876.94	18	0.0719304
1445	2876.99	18	0.0717688
1447	2877.04	18	0.0719796
1449	2877.09	18	0.0718307
1451	2877.14	18	0.0719229
1453	2877.19	18	0.0718953
1455	2877.24	18	0.0716336
1457	2877.29	18	0.0717104
1459	2877.34	18	0.0718953
1461	2877.39	18	0.0715669
1463	2877.44	18	0.0715357
1465	2877.49	18	0.0713737
1467	2877.54	18	0.0710422
1469	2877.59	18	0.0708964
1471	2877.64	18	0.0706743
1473	2877.69	18	0.0712806
1475	2877.74	18	0.0709496
1477	2877.79	18	0.0712582
1479	2877.84	18	0.070738
1481	2877.89	18	0.0707221
1483	2877.94	18	0.0699968
1485	2877.99	18	0.0699073
1487	2878.04	18	0.0695609
1489	2878.09	18	0.069308
1491	2878.14	18	0.069877
1493	2878.19	18	0.0707494
1495	2878.24	18	0.0708653
1497	2878.29	18	0.0704728
1499	2878.34	18	0.0697799
1501	2878.39	18	0.0692746
1503	2878.44	18	0.0690384
1505	2878.49	18	0.0685348
1507	2878.54	18	0.0692307
1509	2878.59	18	0.0697681
1511	2878.64	18	0.0707617
1513	2878.69	18	0.0710106
1515	2878.74	18	0.071195
1517	2878.79	18	0.0720911
1519	2878.84	18	0.0730188
1521	2878.89	18	0.0734324
1523	2878.94	18	0.072852
1525	2878.99	18	0.0724129
1527	2879.04	18	0.072632
1529	2879.09	18	0.071879
1531	2879.14	18	0.072164
1533	2879.19	18	0.0723725
1535	2879.24	18	0.0721144
1537	2879.29	18	0.0722439
1539	2879.34	18	0.0721987
1541	2879.39	18	0.0714264
1543	2879.44	18	0.0711972
1545	2879.49	18	0.0706664
1547	2879.54	18	0.0701843
1549	2879.59	18	0.0699815
1551	2879.64	18	0.0700096
1553	2879.69	18	0.0699275
1555	2879.74	18	0.070035
1557	2879.79	18	0.0701821
1559	2879.84	18	0.0697378
1561	2879.89	18	0.0693633
1563	2879.94	18	0.0691723
1565	2879.99	18	0.06898
1567	2880.04	18	0.068969
1569	2880.09	18	0.0686512
1571	2880.14	18	0.0683627
1573	2880.19	18	0.0682477
1575	2880.24	18	0.0681362
1577	2880.29	18	0.0679873
1579	2880.34	18	0.0681533
1581	2880.39	18	0.0678407
1583	2880.44	18	0.0678719
1585	2880.49	18	0.0683864
1587	2880.54	18	0.0684777
1589	2880.59	18	0.0683131
1591	2880.64	18	0.0684712
1593	2880.69	18	0.0682393
1595	2880.74	18	0.0686424
1597	2880.79	18	0.0687859
1599	2880.84	18	0.0683236
1601	2880.89	18	0.068447
1603	2880.94	18	0.067968
1605	2880.99	18	0.0692768
1607	2881.04	18	0.0699095
1609	2881.09	18	0.0704135
1611	2881.14	18	0.0712297
1613	2881.19	18	0.0708315
1615	2881.24	18	0.0706616
1617	2881.29	18	0.0700934
1619	2881.34	18	0.07055
1621	2881.39	18	0.0704842
1623	2881.44	18	0.0698954
1625	2881.49	18	0.0701365
1627	2881.54	18	0.069798
1629	2881.59	18	0.0699411
1631	2881.64	18	0.0699108
1633	2881.69	18	0.0704429
1635	2881.74	18	0.0701136
1637	2881.79	18	0.070305
1639	2881.84	18	0.0697014
1641	2881.89	18	0.0692685
1643	2881.94	18	0.0687486
1645	2881.99	18	0.0686455
1647	2882.04	18	0.0687658
1649	2882.09	18	0.0687557
1651	2882.14	18	0.0684883
1653	2882.19	18	0.0686384
1655	2882.24	18	0.0687767
1657	2882.29	18	0.0686235
1659	2882.34	18	0.0687311
1661	2882.39	18	0.0683829
1663	2882.44	18	0.068429
1665	2882.49	18	0.068883
1667	2882.54	18	0.0693225
1669	2882.59	18	0.0706168
1671	2882.64	18	0.0710628
1673	2882.69	18	0.0713482
1675	2882.74	18	0.0705066
1677	2882.79	18	0.071008
1679	2882.84	18	0.0701487
1681	2882.89	18	0.0706958
1683	2882.94	18	0.0700306
1685	2882.99	18	0.0702765
1687	2883.04	18	0.0703735
1689	2883.09	18	0.0701193
1691	2883.14	18	0.0703889
1693	2883.19	18	0.0709724
1695	2883.24	18	0.0713421
1697	2883.29	18	0.0714343
1699	2883.34	18	0.0718637
1701	2883.39	18	0.0714316
1703	2883.44	18	0.0718062
1705	2883.49	18	0.0720121
1707	2883.54	18	0.0718448
1709	2883.59	18	0.0720037
1711	2883.64	18	0.0717798
1713	2883.69	18	0.0717223
1715	2883.74	18	0.0714523
1717	2883.79	18	0.071429
1719	2883.84	18	0.0706809
1721	2883.89	18	0.0710668
1723	2883.94	18	0.0707753
1725	2883.99	18	0.0712999
1727	2884.04	18	0.0706616
1729	2884.09	18	0.0702699
1731	2884.14	18	0.0698664
1733	2884.19	18	0.0700083
1735	2884.24	18	0.0695235
1737	2884.29	18	0.0693449
1739	2884.34	18	0.0696056
1741	2884.39	18	0.0702304
1743	2884.44	18	0.0705979
1745	2884.49	18	0.0705373
1747	2884.54	18	0.0704974
1749	2884.59	18	0.0707138
1751	2884.64	18	0.0704109
1753	2884.69	18	0.0701505
1755	2884.74	18	0.0698239
1757	2884.79	18	0.0698164
1759	2884.84	18	0.0700008
1761	2884.89	18	0.0702036
1763	2884.94	18	0.0701663
1765	2884.99	18	0.0696877
1767	2885.04	18	0.0701369
1769	2885.09	18	0.0696548
1771	2885.14	18	0.07037
1773	2885.19	18	0.0704012
1775	2885.24	18	0.0707854
1777	2885.29	18	0.0701408
1779	2885.34	18	0.0710369
1781	2885.39	18	0.0699068
1783	2885.44	18	0.0708604
1785	2885.49	18	0.0704754
1787	2885.54	18	0.0711665
1789	2885.59	18	0.0711177
1791	2885.64	18	0.0714738
1793	2885.69	18	0.0720924
1795	2885.74	18	0.0722404
1797	2885.79	18	0.0724608
1799	2885.84	18	0.072538
1801	2885.89	18	0.0727523
1803	2885.94	18	0.0727409
1805	2885.99	18	0.0724744
1807	2886.04	18	0.0721666
1809	2886.09	18	0.0712894
1811	2886.14	18	0.071433
1813	2886.19	18	0.0706488
1815	2886.24	18	0.0707928
1817	2886.29	18	0.0709996
1819	2886.34	18	0.0700557
1821	2886.39	18	0.070122
1823	2886.44	18	0.0705658
1825	2886.49	18	0.0710971
1827	2886.54	18	0.0711722
1829	2886.59	18	0.0712925
1831	2886.64	18	0.0707981
1833	2886.69	18	0.0714606
1835	2886.74	18	0.0714444
1837	2886.79	18	0.0712648
1839	2886.84	18	0.0716507
1841	2886.89	18	0.0715212
1843	2886.94	18	0.0710207
1845	2886.99	18	0.0705636
1847	2887.04	18	0.0703595
1849	2887.09	18	0.0697681
1851	2887.14	18	0.0693115
1853	2887.19	18	0.0695868
1855	2887.24	18	0.0696768
1857	2887.29	18	0.0707963
1859	2887.34	18	0.0710413
1861	2887.39	18	0.0705399
1863	2887.44	18	0.0697299
1865	2887.49	18	0.0690801
1867	2887.54	18	0.0692386
1869	2887.59	18	0.0701553
1871	2887.64	18	0.0708236
1873	2887.69	18	0.0719445
1875	2887.74	18	0.0711862
1877	2887.79	18	0.0708332
1879	2887.84	18	0.0698348
1881	2887.89	18	0.070086
1883	2887.94	18	0.0698581
1885	2887.99	18	0.0693778
1887	2888.04	18	0.0693383
1889	2888.09	18	0.0700899
1891	2888.14	18	0.0699147
1893	2888.19	18	0.0699674
1895	2888.24	18	0.070212
1897	2888.29	18	0.0691723
1899	2888.34	18	0.0690134
1901	2888.39	18	0.0686073
1903	2888.44	18	0.0688316
1905	2888.49	18	0.0678262
1907	2888.54	18	0.0684527
1909	2888.59	18	0.0677357
1911	2888.64	18	0.0685396
1913	2888.69	18	0.0684856
1915	2888.74	18	0.0689163
1917	2888.79	18	0.0683026
1919	2888.84	18	0.0686907
1921	2888.89	18	0.0686261
1923	2888.94	18	0.0699112
1925	2888.99	18	0.0710787
1927	2889.04	18	0.0716279
1929	2889.09	18	0.0723967
1931	2889.14	18	0.0724867
1933	2889.19	18	0.0720801
1935	2889.24	18	0.0729442
1937	2889.29	18	0.0728801
1939	2889.34	18	0.0732625
1941	2889.39	18	0.0737217
1943	2889.44	18	0.0736941
1945	2889.49	18	0.0734284
1947	2889.54	18	0.073604
1949	2889.59	18	0.0728757
1951	2889.64	18	0.0728976
1953	2889.69	18	0.0728107
1955	2889.74	18	0.0725113
1957	2889.79	18	0.072625
1959	2889.84	18	0.0731334
1961	2889.89	18	0.0729442
1963	2889.94	18	0.0725464
1965	2889.99	18	0.0727128
1967	2890.04	18	0.07243
1969	2890.09	18	0.0726079
1971	2890.14	18	0.0724371
1973	2890.19	18	0.0747873
1975	2890.24	18	0.0751671
1977	2890.29	18	0.0738934
1979	2890.34	18	0.0731988
1981	2890.39	18	0.0733209
1983	2890.44	18	0.073212
1985	2890.49	18	0.0735817
1987	2890.54	18	0.0739944
1989	2890.59	18	0.0732453
1991	2890.64	18	0.0725394
1993	2890.69	18	0.0727936
1995	2890.74	18	0.0732985
1997	2890.79	18	0.0735048
1999	2890.84	18	0.0738956
2001	2890.89	18	0.0741059
2003	2890.94	18	0.0740264
2005	2890.99	18	0.0740053
2007	2891.04	18	0.0742705
2009	2891.09	18	0.0736545
2011	2891.14	18	0.0742367
2013	2891.19	18	0.0757769
2015	2891.24	18	0.0757361
2017	2891.29	18	0.0752922
2019	2891.34	18	0.0746731
2021	2891.39	18	0.074566
2023	2891.44	18	0.0740949
2025	2891.49	18	0.0744088
2027	2891.54	18	0.073734
2029	2891.59	18	0.073644
2031	2891.64	18	0.0727123
2033	2891.69	18	0.0727545
2035	2891.74	18	0.0720432
2037	2891.79	18	0.0724805
2039	2891.84	18	0.072776
2041	2891.89	18	0.0730412
2043	2891.94	18	0.0729121
2045	2891.99	18	0.0731549
2047	2892.04	18	0.0724445
2049	2892.09	18	0.0726026
2051	2892.14	18	0.0723396
2053	2892.19	18	0.0717258
2055	2892.24	18	0.0719172
2057	2892.29	18	0.0718821
2059	2892.34	18	0.0716393
2061	2892.39	18	0.071253
2063	2892.44	18	0.0713478
2065	2892.49	18	0.0706888
2067	2892.54	18	0.0712371
2069	2892.59	18	0.0710813
2071	2892.64	18	0.0715901
2073	2892.69	18	0.0721934
2075	2892.74	18	0.0724406
2077	2892.79	18	0.0728155
2079	2892.84	18	0.0733937
2081	2892.89	18	0.072729
2083	2892.94	18	0.0726408
2085	2892.99	18	0.0723102
2087	2893.04	18	0.0723795
2089	2893.09	18	0.072499
2091	2893.14	18	0.0730105
2093	2893.19	18	0.0742648
2095	2893.24	18	0.0748079
2097	2893.29	18	0.0747776
2099	2893.34	18	0.07417
2101	2893.39	18	0.0743302
2103	2893.44	18	0.0744997
2105	2893.49	18	0.0756259
2107	2893.54	18	0.0751798
2109	2893.59	18	0.0755271
2111	2893.64	18	0.0745651
2113	2893.69	18	0.0759358
2115	2893.74	18	0.0764271
2117	2893.79	18	0.0767481
2119	2893.84	18	0.0756171
2121	2893.89	18	0.0752127
2123	2893.94	18	0.0751341
2125	2893.99	18	0.073853
2127	2894.04	18	0.073997
2129	2894.09	18	0.0731549
2131	2894.14	18	0.0727488
2133	2894.19	18	0.0733244
2135	2894.24	18	0.073093
2137	2894.29	18	0.0732524
2139	2894.34	18	0.0734153
2141	2894.39	18	0.0734754
2143	2894.44	18	0.0725978
2145	2894.49	18	0.0729815
2147	2894.54	18	0.0725003
2149	2894.59	18	0.0722369
2151	2894.64	18	0.0724033
2153	2894.69	18	0.0718448
2155	2894.74	18	0.0716819
2157	2894.79	18	0.0716534
2159	2894.84	18	0.0714176
2161	2894.89	18	0.0712688
2163	2894.94	18	0.0715353
2165	2894.99	18	0.0719954
2167	2895.04	18	0.0720358
2169	2895.09	18	0.0721688
2171	2895.14	18	0.0714914
2173	2895.19	18	0.07149
2175	2895.24	18	0.0712213
2177	2895.29	18	0.0715651
2179	2895.34	18	0.0721583
2181	2895.39	18	0.0723203
2183	2895.44	18	0.0722772
2185	2895.49	18	0.0715107
2187	2895.54	18	0.0711252
2189	2895.59	18	0.070489
2191	2895.64	18	0.0701733
2193	2895.69	18	0.0706427
2195	2895.74	18	0.070662
2197	2895.79	18	0.0702273
2199	2895.84	18	0.0705606
2201	2895.89	18	0.0706646
2203	2895.94	18	0.0703472
2205	2895.99	18	0.0707581
2207	2896.04	18	0.070064
2209	2896.09	18	0.0698462
2211	2896.14	18	0.0699854
2213	2896.19	18	0.069243
2215	2896.24	18	0.0704372
2217	2896.29	18	0.0711682
2219	2896.34	18	0.0714395
2221	2896.39	18	0.0712459
2223	2896.44	18	0.0711432
2225	2896.49	18	0.0714821
2227	2896.54	18	0.070673
2229	2896.59	18	0.0708367
2231	2896.64	18	0.0696013
2233	2896.69	18	0.0696715
2235	2896.74	18	0.0691956
2237	2896.79	18	0.0699665
2239	2896.84	18	0.0701237
2241	2896.89	18	0.0702752
2243	2896.94	18	0.0700104
2245	2896.99	18	0.0694076
2247	2897.04	18	0.0694968
2249	2897.09	18	0.0689813
2251	2897.14	18	0.0693598
2253	2897.19	18	0.0698348
2255	2897.24	18	0.0697431
2257	2897.29	18	0.0688329
2259	2897.34	18	0.0688909
2261	2897.39	18	0.0696065
2263	2897.44	18	0.0696065
2265	2897.49	18	0.0699033
2267	2897.54	18	0.0693251
2269	2897.59	18	0.0691161
2271	2897.64	18	0.0692057
2273	2897.69	18	0.0683017
2275	2897.74	18	0.0681274
2277	2897.79	18	0.0690485
2279	2897.84	18	0.0695701
2281	2897.89	18	0.0693778
2283	2897.94	18	0.0693817
2285	2897.99	18	0.0695288
2287	2898.04	18	0.06911
2289	2898.09	18	0.0691231
2291	2898.14	18	0.068987
2293	2898.19	18	0.0688426
2295	2898.24	18	0.0684207
2297	2898.29	18	0.0680923
2299	2898.34	18	0.06808
2301	2898.39	18	0.0676045
2303	2898.44	18	0.0673687
2305	2898.49	18	0.0672387
2307	2898.54	18	0.0671883
2309	2898.59	18	0.0678416
2311	2898.64	18	0.0690709
2313	2898.69	18	0.0695525
2315	2898.74	18	0.0704412
2317	2898.79	18	0.0697725
2319	2898.84	18	0.0699354
2321	2898.89	18	0.0699011
2323	2898.94	18	0.0704578
2325	2898.99	18	0.0698142
2327	2899.04	18	0.0695855
2329	2899.09	18	0.0689537
2331	2899.14	18	0.0687197
2333	2899.19	18	0.068296
2335	2899.24	18	0.0685888
2337	2899.29	18	0.0684654
2339	2899.34	18	0.0700842
2341	2899.39	18	0.0684676
2343	2899.44	18	0.0673937
2345	2899.49	18	0.0672247
2347	2899.54	18	0.0668454
2349	2899.59	18	0.0663185
2351	2899.64	18	0.0661433
2353	2899.69	18	0.0662469
2355	2899.74	18	0.0665363
2357	2899.79	18	0.0675303
2359	2899.84	18	0.0676304
2361	2899.89	18	0.0680795
2363	2899.94	18	0.0675948
2365	2899.99	18	0.067208
2367	2900.04	18	0.0668186
2369	2900.09	18	0.0673257
2371	2900.14	18	0.0668392
2373	2900.19	18	0.0671066
2375	2900.24	18	0.0670552
2377	2900.29	18	0.0674925
2379	2900.34	18	0.0676216
2381	2900.39	18	0.068548
2383	2900.44	18	0.0681471
2385	2900.49	18	0.0686793
2387	2900.54	18	0.0687767
2389	2900.59	18	0.0688566
2391	2900.64	18	0.0694757
2393	2900.69	18	0.0700083
2395	2900.74	18	0.0693124
2397	2900.79	18	0.0688865
2399	2900.84	18	0.0688004
2401	2900.89	18	0.0686086
2403	2900.94	18	0.0691482
2405	2900.99	18	0.0692685
2407	2901.04	18	0.0704965
2409	2901.09	18	0.0712639
2411	2901.14	18	0.0710699
2413	2901.19	18	0.0706831
2415	2901.24	18	0.0701931
2417	2901.29	18	0.0698923
2419	2901.34	18	0.0696899
2421	2901.39	18	0.0696935
2423	2901.44	18	0.0697764
2425	2901.49	18	0.0694199
2427	2901.54	18	0.0697132
2429	2901.59	18	0.0695613
2431	2901.64	18	0.0699613
2433	2901.69	18	0.0704117
2435	2901.74	18	0.07059
2437	2901.79	18	0.0702998
2439	2901.84	18	0.0704565
2441	2901.89	18	0.0703876
2443	2901.94	18	0.0698168
2445	2901.99	18	0.069852
2447	2902.04	18	0.0698432
2449	2902.09	18	0.0693989
2451	2902.14	18	0.0693444
2453	2902.19	18	0.0694414
2455	2902.24	18	0.0688983
2457	2902.29	18	0.068814
2459	2902.34	18	0.0693247
2461	2902.39	18	0.0693312
2463	2902.44	18	0.0692588
2465	2902.49	18	0.0689194
2467	2902.54	18	0.0688487
2469	2902.59	18	0.0690252
2471	2902.64	18	0.0687473
2473	2902.69	18	0.0686257
2475	2902.74	18	0.0685142
2477	2902.79	18	0.0688136
2479	2902.84	18	0.0688825
2481	2902.89	18	0.0685203
2483	2902.94	18	0.0677775
2485	2902.99	18	0.0680058
2487	2903.04	18	0.0675136
2489	2903.09	18	0.068008
2491	2903.14	18	0.0682477
2493	2903.19	18	0.0691258
2495	2903.24	18	0.0696715
2497	2903.29	18	0.0695727
2499	2903.34	18	0.0692939
2501	2903.39	18	0.0685519
2503	2903.44	18	0.0686516
2505	2903.49	18	0.0683877
2507	2903.54	18	0.0687662
2509	2903.59	18	0.0691508
2511	2903.64	18	0.0694129
2513	2903.69	18	0.0695025
2515	2903.74	18	0.0688983
2517	2903.79	18	0.0689475
2519	2903.84	18	0.068847
2521	2903.89	18	0.0689598
2523	2903.94	18	0.0693001
2525	2903.99	18	0.0689014
2527	2904.04	18	0.0691899
2529	2904.09	18	0.0691192
2531	2904.14	18	0.0688145
2533	2904.19	18	0.068998
2535	2904.24	18	0.0683526
2537	2904.29	18	0.0687021
2539	2904.34	18	0.0688615
2541	2904.39	18	0.0688645
2543	2904.44	18	0.0676795
2545	2904.49	18	0.0686108
2547	2904.54	18	0.0698419
2549	2904.59	18	0.0702559
2551	2904.64	18	0.0704539
2553	2904.69	18	0.0700258
2555	2904.74	18	0.0703007
2557	2904.79	18	0.0707055
2559	2904.84	18	0.071029
2561	2904.89	18	0.0707472
2563	2904.94	18	0.0705702
2565	2904.99	18	0.0705219
2567	2905.04	18	0.0704205
2569	2905.09	18	0.0705092
2571	2905.14	18	0.0704776
2573	2905.19	18	0.0699002
2575	2905.24	18	0.0700693
2577	2905.29	18	0.0699797
2579	2905.34	18	0.0700662
2581	2905.39	18	0.0699042
2583	2905.44	18	0.0700096
2585	2905.49	18	0.070277
2587	2905.54	18	0.0701821
2589	2905.59	18	0.07037
2591	2905.64	18	0.0703542
2593	2905.69	18	0.0708495
2595	2905.74	18	0.0717851
2597	2905.79	18	0.0720121
2599	2905.84	18	0.0718391
2601	2905.89	18	0.0720046
2603	2905.94	18	0.0716169
2605	2905.99	18	0.0711261
2607	2906.04	18	0.0707889
2609	2906.09	18	0.0704091
2611	2906.14	18	0.0703029
2613	2906.19	18	0.0700122
2615	2906.24	18	0.0702431
2617	2906.29	18	0.0703002
2619	2906.34	18	0.0701237
2621	2906.39	18	0.0701387
2623	2906.44	18	0.069783
2625	2906.49	18	0.0694568
2627	2906.54	18	0.0693255
2629	2906.59	18	0.0685291
2631	2906.64	18	0.0688413
2633	2906.69	18	0.0687161
2635	2906.74	18	0.0685212
2637	2906.79	18	0.0679825
2639	2906.84	18	0.0682942
2641	2906.89	18	0.0679158
2643	2906.94	18	0.0681344
2645	2906.99	18	0.06817
2647	2907.04	18	0.068148
2649	2907.09	18	0.0678086
2651	2907.14	18	0.0678736
2653	2907.19	18	0.0680321
2655	2907.24	18	0.0677854
2657	2907.29	18	0.0680659
2659	2907.34	18	0.0678082
2661	2907.39	18	0.0678337
2663	2907.44	18	0.0678165
2665	2907.49	18	0.067907
2667	2907.54	18	0.0682437
2669	2907.59	18	0.068213
2671	2907.64	18	0.0682292
2673	2907.69	18	0.067968
2675	2907.74	18	0.0673876
2677	2907.79	18	0.0674012
2679	2907.84	18	0.0673582
2681	2907.89	18	0.0669683
2683	2907.94	18	0.0668427
2685	2907.99	18	0.066934
2687	2908.04	18	0.0669266
2689	2908.09	18	0.0671189
2691	2908.14	18	0.0670126
2693	2908.19	18	0.0665042
2695	2908.24	18	0.0663914
2697	2908.29	18	0.0666004
2699	2908.34	18	0.066376
2701	2908.39	18	0.0663576
2703	2908.44	18	0.0663751
2705	2908.49	18	0.0663729
2707	2908.54	18	0.0662987
2709	2908.59	18	0.0661284
2711	2908.64	18	0.0661683
2713	2908.69	18	0.0668757
2715	2908.74	18	0.0669595
2717	2908.79	18	0.0665604
2719	2908.84	18	0.0663962
2721	2908.89	18	0.0661543
2723	2908.94	18	0.0659054
2725	2908.99	18	0.0660173
2727	2909.04	18	0.0660099
2729	2909.09	18	0.0658909
2731	2909.14	18	0.0659216
2733	2909.19	18	0.0661499
2735	2909.24	18	0.0660603
2737	2909.29	18	0.0666741
2739	2909.34	18	0.066517
2741	2909.39	18	0.0664814
2743	2909.44	18	0.0666658
2745	2909.49	18	0.0662228
2747	2909.54	18	0.0661429
2749	2909.59	18	0.0660151
2751	2909.64	18	0.0657649
2753	2909.69	18	0.0658364
2755	2909.74	18	0.0655616
2757	2909.79	18	0.065436
2759	2909.84	18	0.0651449
2761	2909.89	18	0.0646967
2763	2909.94	18	0.0644324
2765	2909.99	18	0.0643538
2767	2910.04	18	0.064111
2769	2910.09	18	0.0641764
2771	2910.14	18	0.0644723
2773	2910.19	18	0.0646251
2775	2910.24	18	0.0651831
2777	2910.29	18	0.0652968
2779	2910.34	18	0.0655796
2781	2910.39	18	0.0654628
2783	2910.44	18	0.0651858
2785	2910.49	18	0.064921
2787	2910.54	18	0.0646708
2789	2910.59	18	0.0649904
2791	2910.64	18	0.064619
2793	2910.69	18	0.0650861
2795	2910.74	18	0.065069
2797	2910.79	18	0.0649557
2799	2910.84	18	0.0647226
2801	2910.89	18	0.0647243
2803	2910.94	18	0.0649526
2805	2910.99	18	0.0651765
2807	2911.04	18	0.0655335
2809	2911.09	18	0.0657592
2811	2911.14	18	0.0663462
2813	2911.19	18	0.0659005
2815	2911.24	18	0.0664436
2817	2911.29	18	0.0666337
2819	2911.34	18	0.0665187
2821	2911.39	18	0.0664449
2823	2911.44	18	0.0661569
2825	2911.49	18	0.0657012
2827	2911.54	18	0.0659005
2829	2911.59	18	0.0659185
2831	2911.64	18	0.0657614
2833	2911.69	18	0.0660279
2835	2911.74	18	0.0661609
2837	2911.79	18	0.066106
2839	2911.84	18	0.066059
2841	2911.89	18	0.0657139
2843	2911.94	18	0.0655822
2845	2911.99	18	0.0658031
2847	2912.04	18	0.0656292
2849	2912.09	18	0.0654035
2851	2912.14	18	0.0656582
2853	2912.19	18	0.0657289
2855	2912.24	18	0.0657548
2857	2912.29	18	0.0655238
2859	2912.34	18	0.0654856
2861	2912.39	18	0.0656305
2863	2912.44	18	0.065285
2865	2912.49	18	0.0651225
2867	2912.54	18	0.065299
2869	2912.59	18	0.064939
2871	2912.64	18	0.0645742
2873	2912.69	18	0.0644736
2875	2912.74	18	0.064028
2877	2912.79	18	0.0638871
2879	2912.84	18	0.0636408
2881	2912.89	18	0.0633128
2883	2912.94	18	0.0631345
2885	2912.99	18	0.0630981
2887	2913.04	18	0.0629901
2889	2913.09	18	0.062944
2891	2913.14	18	0.0627337
2893	2913.19	18	0.0625502
2895	2913.24	18	0.0626863
2897	2913.29	18	0.0629589
2899	2913.34	18	0.062915
2901	2913.39	18	0.0631165
2903	2913.44	18	0.0628786
2905	2913.49	18	0.0630103
2907	2913.54	18	0.0632509
2909	2913.59	18	0.0630568
2911	2913.64	18	0.0629787
2913	2913.69	18	0.0632324
2915	2913.74	18	0.0630805
2917	2913.79	18	0.0631661
2919	2913.84	18	0.0625831
2921	2913.89	18	0.0626648
2923	2913.94	18	0.0631925
2925	2913.99	18	0.0631837
2927	2914.04	18	0.0633018
2929	2914.09	18	0.0632829
2931	2914.14	18	0.0630055
2933	2914.19	18	0.0629681
2935	2914.24	18	0.0627837
2937	2914.29	18	0.0627482
2939	2914.34	18	0.063308
2941	2914.39	18	0.0636333
2943	2914.44	18	0.0635358
2945	2914.49	18	0.0636737
2947	2914.54	18	0.0635284
2949	2914.59	18	0.0635819
2951	2914.64	18	0.0636399
2953	2914.69	18	0.0638072
2955	2914.74	18	0.0638159
2957	2914.79	18	0.0639534
2959	2914.84	18	0.063783
2961	2914.89	18	0.0636443
2963	2914.94	18	0.0635126
2965	2914.99	18	0.0632842
2967	2915.04	18	0.0633216
2969	2915.09	18	0.0632417
2971	2915.14	18	0.063149
2973	2915.19	18	0.0633817
2975	2915.24	18	0.0632513
2977	2915.29	18	0.0634726
2979	2915.34	18	0.0637562
2981	2915.39	18	0.0639375
2983	2915.44	18	0.0643652
2985	2915.49	18	0.0643129
2987	2915.54	18	0.0642115
2989	2915.59	18	0.0642862
2991	2915.64	18	0.0641913
2993	2915.69	18	0.0641272
2995	2915.74	18	0.0643388
2997	2915.79	18	0.0642835
2999	2915.84	18	0.0642045
3001	2915.89	18	0.0645303
3003	2915.94	18	0.0642365
3005	2915.99	18	0.0641865
3007	2916.04	18	0.0641777
3009	2916.09	18	0.0639292
3011	2916.14	18	0.0640192
3013	2916.19	18	0.0637597
3015	2916.24	18	0.0636601
3017	2916.29	18	0.0636956
3019	2916.34	18	0.0636675
3021	2916.39	18	0.0635042
3023	2916.44	18	0.0636026
3025	2916.49	18	0.0635494
3027	2916.54	18	0.0635767
3029	2916.59	18	0.063711
3031	2916.64	18	0.0641768
3033	2916.69	18	0.065058
3035	2916.74	18	0.0650198
3037	2916.79	18	0.0646387
3039	2916.84	18	0.0650922
3041	2916.89	18	0.0645527
3043	2916.94	18	0.0645469
3045	2916.99	18	0.0650699
3047	2917.04	18	0.0656349
3049	2917.09	18	0.0657859
3051	2917.14	18	0.066052
3053	2917.19	18	0.0659923
3055	2917.24	18	0.0663409
3057	2917.29	18	0.0665705
3059	2917.34	18	0.0667536
3061	2917.39	18	0.0669683
3063	2917.44	18	0.0663106
3065	2917.49	18	0.0663993
3067	2917.54	18	0.066401
3069	2917.59	18	0.0662395
3071	2917.64	18	0.0659462
3073	2917.69	18	0.0660371
3075	2917.74	18	0.0656143
3077	2917.79	18	0.0652358
3079	2917.84	18	0.065227
3081	2917.89	18	0.0652117
3083	2917.94	18	0.0652262
3085	2917.99	18	0.0654233
3087	2918.04	18	0.0655502
3089	2918.09	18	0.0658162
3091	2918.14	18	0.0656929
3093	2918.19	18	0.0654628
3095	2918.24	18	0.0652692
3097	2918.29	18	0.0648762
3099	2918.34	18	0.0645834
3101	2918.39	18	0.0643134
3103	2918.44	18	0.0644187
3105	2918.49	18	0.0645777
3107	2918.54	18	0.0647204
3109	2918.59	18	0.0649162
3111	2918.64	18	0.0649882
3113	2918.69	18	0.0647647
3115	2918.74	18	0.0647112
3117	2918.79	18	0.0647647
3119	2918.84	18	0.064525
3121	2918.89	18	0.064568
3123	2918.94	18	0.0642383
3125	2918.99	18	0.0643134
3127	2919.04	18	0.0646905
3129	2919.09	18	0.0650883
3131	2919.14	18	0.0653364
3133	2919.19	18	0.0655475
3135	2919.24	18	0.0654567
3137	2919.29	18	0.06513
3139	2919.34	18	0.0651111
3141	2919.39	18	0.0648657
3143	2919.44	18	0.064669
3145	2919.49	18	0.0647458
3147	2919.54	18	0.0646541
3149	2919.59	18	0.0647423
3151	2919.64	18	0.0648012
3153	2919.69	18	0.064532
3155	2919.74	18	0.0644451
3157	2919.79	18	0.0645219
3159	2919.84	18	0.0643586
3161	2919.89	18	0.0644433
3163	2919.94	18	0.0647968
3165	2919.99	18	0.0652442
3167	2920.04	18	0.0662601
3169	2920.09	18	0.0664353
3171	2920.14	18	0.0667097
3173	2920.19	18	0.0666495
3175	2920.24	18	0.0663102
3177	2920.29	18	0.0658435
3179	2920.34	18	0.0658593
3181	2920.39	18	0.065328
3183	2920.44	18	0.0652477
3185	2920.49	18	0.0652125
3187	2920.54	18	0.0650971
3189	2920.59	18	0.0651994
3191	2920.64	18	0.0651278
3193	2920.69	18	0.0656217
3195	2920.74	18	0.0659256
3197	2920.79	18	0.0660015
3199	2920.84	18	0.0667185
3201	2920.89	18	0.0670631
3203	2920.94	18	0.0667905
3205	2920.99	18	0.0670192
3207	2921.04	18	0.0666583
3209	2921.09	18	0.066063
3211	2921.14	18	0.066592
3213	2921.19	18	0.0659782
3215	2921.24	18	0.066383
3217	2921.29	18	0.0660568
3219	2921.34	18	0.0662118
3221	2921.39	18	0.0657205
3223	2921.44	18	0.0660612
3225	2921.49	18	0.0656059
3227	2921.54	18	0.0655453
3229	2921.59	18	0.0660691
3231	2921.64	18	0.0658755
3233	2921.69	18	0.0660445
3235	2921.74	18	0.0652762
3237	2921.79	18	0.0652424
3239	2921.84	18	0.0648679
3241	2921.89	18	0.065303
3243	2921.94	18	0.0666315
3245	2921.99	18	0.0668656
3247	2922.04	18	0.0673498
3249	2922.09	18	0.0679724
3251	2922.14	18	0.0680593
3253	2922.19	18	0.0677401
3255	2922.24	18	0.0681335
3257	2922.29	18	0.0682617
3259	2922.34	18	0.0684676
3261	2922.39	18	0.0684075
3263	2922.44	18	0.06844
3265	2922.49	18	0.0682428
3267	2922.54	18	0.0682521
3269	2922.59	18	0.0680589
3271	2922.64	18	0.0680097
3273	2922.69	18	0.068415
3275	2922.74	18	0.0690186
3277	2922.79	18	0.0684567
3279	2922.84	18	0.0691135
3281	2922.89	18	0.0684791
3283	2922.94	18	0.0685489
3285	2922.99	18	0.0680181
3287	2923.04	18	0.0683012
3289	2923.09	18	0.0681946
3291	2923.14	18	0.068375
3293	2923.19	18	0.0679465
3295	2923.24	18	0.0678661
3297	2923.29	18	0.0675281
3299	2923.34	18	0.0672409
3301	2923.39	18	0.0677933
3303	2923.44	18	0.0681269
3305	2923.49	18	0.0683921
3307	2923.54	18	0.0682218
3309	2923.59	18	0.067914
3311	2923.64	18	0.0680255
3313	2923.69	18	0.0679223
3315	2923.74	18	0.0678073
3317	2923.79	18	0.0677985
3319	2923.84	18	0.0675189
3321	2923.89	18	0.0666754
3323	2923.94	18	0.0666689
3325	2923.99	18	0.06665
3327	2924.04	18	0.0680233
3329	2924.09	18	0.0686283
3331	2924.14	18	0.0700921
3333	2924.19	18	0.0697782
3335	2924.24	18	0.0685238
3337	2924.29	18	0.0682854
3339	2924.34	18	0.0688904
3341	2924.39	18	0.0686678
3343	2924.44	18	0.0690204
3345	2924.49	18	0.0687113
3347	2924.54	18	0.0698998
3349	2924.59	18	0.0693273
3351	2924.64	18	0.0700004
3353	2924.69	18	0.0706005
3355	2924.74	18	0.0697233
3357	2924.79	18	0.0687772
3359	2924.84	18	0.0688105
3361	2924.89	18	0.0684325
3363	2924.94	18	0.0682507
3365	2924.99	18	0.0683737
3367	2925.04	18	0.0685835
3369	2925.09	18	0.0686973
3371	2925.14	18	0.0687113
3373	2925.19	18	0.0692491
3375	2925.24	18	0.069661
3377	2925.29	18	0.0708521
3379	2925.34	18	0.071177
3381	2925.39	18	0.0714211
3383	2925.44	18	0.0717873
3385	2925.49	18	0.0724375
3387	2925.54	18	0.0726008
3389	2925.59	18	0.0724002
3391	2925.64	18	0.0720599
3393	2925.69	18	0.0721706
3395	2925.74	18	0.0724379
3397	2925.79	18	0.0733156
3399	2925.84	18	0.0736163
3401	2925.89	18	0.0739768
3403	2925.94	18	0.0740896
3405	2925.99	18	0.074314
3407	2926.04	18	0.074325
3409	2926.09	18	0.0736699
3411	2926.14	18	0.0733147
3413	2926.19	18	0.0738249
3415	2926.24	18	0.073846
3417	2926.29	18	0.0737999
3419	2926.34	18	0.0733529
3421	2926.39	18	0.0724436
3423	2926.44	18	0.0723023
3425	2926.49	18	0.0716367
3427	2926.54	18	0.0715612
3429	2926.59	18	0.0712806
3431	2926.64	18	0.0708139
3433	2926.69	18	0.0707287
3435	2926.74	18	0.0708201
3437	2926.79	18	0.0708705
3439	2926.84	18	0.0709232
3441	2926.89	18	0.0709777
3443	2926.94	18	0.0719515
3445	2926.99	18	0.070864
3447	2927.04	18	0.0709654
3449	2927.09	18	0.07046
3451	2927.14	18	0.071271
3453	2927.19	18	0.0709641
3455	2927.24	18	0.0734398
3457	2927.29	18	0.0739825
3459	2927.34	18	0.0740945
3461	2927.39	18	0.0737323
3463	2927.44	18	0.0734372
3465	2927.49	18	0.0729538
3467	2927.54	18	0.0719212
3469	2927.59	18	0.0715278
3471	2927.64	18	0.0711564
3473	2927.69	18	0.070813
3475	2927.74	18	0.0704047
3477	2927.79	18	0.0709224
3479	2927.84	18	0.0711375
3481	2927.89	18	0.0712846
3483	2927.94	18	0.0714334
3485	2927.99	18	0.0714545
3487	2928.04	18	0.0713509
3489	2928.09	18	0.0724761
3491	2928.14	18	0.0743061
3493	2928.19	18	0.0748992
3495	2928.24	18	0.0752044
3497	2928.29	18	0.074811
3499	2928.34	18	0.0743649
3501	2928.39	18	0.0735887
3503	2928.44	18	0.073244
3505	2928.49	18	0.0734183
3507	2928.54	18	0.0735803
3509	2928.59	18	0.0736523
3511	2928.64	18	0.073316
3513	2928.69	18	0.0735013
3515	2928.74	18	0.0733358
3517	2928.79	18	0.0735145
3519	2928.84	18	0.0733323
3521	2928.89	18	0.0738495
3523	2928.94	18	0.074786
3525	2928.99	18	0.0752768
3527	2929.04	18	0.0748378
3529	2929.09	18	0.0750661
3531	2929.14	18	0.0750569
3533	2929.19	18	0.0753032
3535	2929.24	18	0.0753598
3537	2929.29	18	0.0752992
3539	2929.34	18	0.0756439
3541	2929.39	18	0.0749142
3543	2929.44	18	0.0743719
3545	2929.49	18	0.0746393
3547	2929.54	18	0.0747271
3549	2929.59	18	0.0752896
3551	2929.64	18	0.0758002
3553	2929.69	18	0.0764636
3555	2929.74	18	0.0764561
3557	2929.79	18	0.0762274
3559	2929.84	18	0.0763112
3561	2929.89	18	0.0757115
3563	2929.94	18	0.075139
3565	2929.99	18	0.0751025
3567	2930.04	18	0.0748325
3569	2930.09	18	0.0748246
3571	2930.14	18	0.074343
3573	2930.19	18	0.0744079
3575	2930.24	18	0.0746881
3577	2930.29	18	0.0742995
3579	2930.34	18	0.0740975
3581	2930.39	18	0.0737823
3583	2930.44	18	0.0733709
3585	2930.49	18	0.073313
3587	2930.54	18	0.073169
3589	2930.59	18	0.07234
3591	2930.64	18	0.072124
3593	2930.69	18	0.0720547
3595	2930.74	18	0.0722715
3597	2930.79	18	0.0725174
3599	2930.84	18	0.0724849
3601	2930.89	18	0.0715296
3603	2930.94	18	0.0718817
3605	2930.99	18	0.0717363
3607	2931.04	18	0.0715282
3609	2931.09	18	0.0719677
3611	2931.14	18	0.0720143
3613	2931.19	18	0.0722676
3615	2931.24	18	0.072726
3617	2931.29	18	0.0728204
3619	2931.34	18	0.0720489
3621	2931.39	18	0.0723791
3623	2931.44	18	0.0719168
3625	2931.49	18	0.0728076
3627	2931.54	18	0.0725477
3629	2931.59	18	0.0739856
3631	2931.64	18	0.0738091
3633	2931.69	18	0.0749019
3635	2931.74	18	0.0748514
3637	2931.79	18	0.0746174
3639	2931.84	18	0.0737002
3641	2931.89	18	0.0751245
3643	2931.94	18	0.0755613
3645	2931.99	18	0.075996
3647	2932.04	18	0.0758002
3649	2932.09	18	0.0756478
3651	2932.14	18	0.0756307
3653	2932.19	18	0.0749616
3655	2932.24	18	0.0745752
3657	2932.29	18	0.0743223
3659	2932.34	18	0.0745247
3661	2932.39	18	0.0747636
3663	2932.44	18	0.0749598
3665	2932.49	18	0.0751451
3667	2932.54	18	0.0749849
3669	2932.59	18	0.0750775
3671	2932.64	18	0.0752496
3673	2932.69	18	0.0761229
3675	2932.74	18	0.0758269
3677	2932.79	18	0.0751297
3679	2932.84	18	0.0742174
3681	2932.89	18	0.0740299
3683	2932.94	18	0.0737358
3685	2932.99	18	0.073496
3687	2933.04	18	0.0732576
3689	2933.09	18	0.0726693
3691	2933.14	18	0.0727071
3693	2933.19	18	0.0731461
3695	2933.24	18	0.0729336
3697	2933.29	18	0.0728524
3699	2933.34	18	0.0727725
3701	2933.39	18	0.0725231
3703	2933.44	18	0.0723067
3705	2933.49	18	0.0722092
3707	2933.54	18	0.0718035
3709	2933.59	18	0.0714567
3711	2933.64	18	0.0713847
3713	2933.69	18	0.0710707
3715	2933.74	18	0.0705355
3717	2933.79	18	0.0707845
3719	2933.84	18	0.0710141
3721	2933.89	18	0.0708266
3723	2933.94	18	0.0706229
3725	2933.99	18	0.0703336
3727	2934.04	18	0.0701979
3729	2934.09	18	0.0703331
3731	2934.14	18	0.0698669
3733	2934.19	18	0.0697466
3735	2934.24	18	0.0700759
3737	2934.29	18	0.0695797
3739	2934.34	18	0.0700306
3741	2934.39	18	0.0705566
3743	2934.44	18	0.0709294
3745	2934.49	18	0.0711744
3747	2934.54	18	0.0711212
3749	2934.59	18	0.0709109
3751	2934.64	18	0.0705202
3753	2934.69	18	0.0703779
3755	2934.74	18	0.0700868
3757	2934.79	18	0.0702563
3759	2934.84	18	0.0698322
3761	2934.89	18	0.0698221
3763	2934.94	18	0.068544
3765	2934.99	18	0.0693132
3767	2935.04	18	0.0694542
3769	2935.09	18	0.0713171
3771	2935.14	18	0.0719295
3773	2935.19	18	0.0716081
3775	2935.24	18	0.0719686
3777	2935.29	18	0.0717175
3779	2935.34	18	0.0714299
3781	2935.39	18	0.071411
3783	2935.44	18	0.0704556
3785	2935.49	18	0.069805
3787	2935.54	18	0.07037
3789	2935.59	18	0.0708846
3791	2935.64	18	0.0712793
3793	2935.69	18	0.0714633
3795	2935.74	18	0.0717908
3797	2935.79	18	0.0714343
3799	2935.84	18	0.0723185
3801	2935.89	18	0.0715818
3803	2935.94	18	0.0715353
3805	2935.99	18	0.0721166
3807	2936.04	18	0.0714532
3809	2936.09	18	0.0728717
3811	2936.14	18	0.0729068
3813	2936.19	18	0.0744286
3815	2936.24	18	0.0752303
3817	2936.29	18	0.0743566
3819	2936.34	18	0.0731962
3821	2936.39	18	0.0731185
3823	2936.44	18	0.0728831
3825	2936.49	18	0.0735075
3827	2936.54	18	0.0727966
3829	2936.59	18	0.0735303
3831	2936.64	18	0.0743794
3833	2936.69	18	0.0739066
3835	2936.74	18	0.0730017
3837	2936.79	18	0.0727071
3839	2936.84	18	0.0740519
3841	2936.89	18	0.075254
3843	2936.94	18	0.0758779
3845	2936.99	18	0.0761224
3847	2937.04	18	0.0762765
3849	2937.09	18	0.076817
3851	2937.14	18	0.0770422
3853	2937.19	18	0.0768433
3855	2937.24	18	0.0750292
3857	2937.29	18	0.0748176
3859	2937.34	18	0.0755179
3861	2937.39	18	0.0758669
3863	2937.44	18	0.0754489
3865	2937.49	18	0.0753629
3867	2937.54	18	0.0742113
3869	2937.59	18	0.074436
3871	2937.64	18	0.0751183
3873	2937.69	18	0.074314
3875	2937.74	18	0.074487
3877	2937.79	18	0.072769
3879	2937.84	18	0.0732107
3881	2937.89	18	0.0720441
3883	2937.94	18	0.0726158
3885	2937.99	18	0.0720665
3887	2938.04	18	0.0728037
3889	2938.09	18	0.0698998
3891	2938.14	18	0.0732857
3893	2938.19	18	0.0722518
3895	2938.24	18	0.0724204
3897	2938.29	18	0.0719769
3899	2938.34	18	0.0723659
3901	2938.39	18	0.0724415
3903	2938.44	18	0.0722224
3905	2938.49	18	0.072074
3907	2938.54	18	0.0718865
3909	2938.59	18	0.0712828
3911	2938.64	18	0.0716283
3913	2938.69	18	0.0713535
3915	2938.74	18	0.0715427
3917	2938.79	18	0.071858
3919	2938.84	18	0.0716933
3921	2938.89	18	0.0716081
3923	2938.94	18	0.0714281
3925	2938.99	18	0.0713873
3927	2939.04	18	0.0709562
3929	2939.09	18	0.0708881
3931	2939.14	18	0.0705233
3933	2939.19	18	0.0702159
3935	2939.24	18	0.0701619
3937	2939.29	18	0.0701483
3939	2939.34	18	0.0699139
3941	2939.39	18	0.0698037
3943	2939.44	18	0.0697953
3945	2939.49	18	0.0702484
3947	2939.54	18	0.0704016
3949	2939.59	18	0.07032
3951	2939.64	18	0.0703187
3953	2939.69	18	0.0702423
3955	2939.74	18	0.06987
3957	2939.79	18	0.0696816
3959	2939.84	18	0.0701764
3961	2939.89	18	0.070129
3963	2939.94	18	0.070104
3965	2939.99	18	0.0706326
3967	2940.04	18	0.0704583
3969	2940.09	18	0.0701852
3971	2940.14	18	0.0702405
3973	2940.19	18	0.0702186
3975	2940.24	18	0.0698862
3977	2940.29	18	0.0697905
3979	2940.34	18	0.0695556
3981	2940.39	18	0.0686332
3983	2940.44	18	0.0687126
3985	2940.49	18	0.0692636
3987	2940.54	18	0.0701944
3989	2940.59	18	0.069502
3991	2940.64	18	0.0701874
3993	2940.69	18	0.0706282
3995	2940.74	18	0.0713241
3997	2940.79	18	0.0711643
[truncated: 34,005 more rows]

## Sheet: Mouse 3_Event Trials
3149.585632	Down
3184.14	Down
3302.79	Down
3335.58	Down
3456.38	Down
3487.78	Down
3603.58	Down
3634.43	Down
3749.83	Down
3780.18	Down
3896.68	Down
3927.48	Down
4042.78	Down
4072.78	Down
4190.63	Down
4220.38	Down
4335.83	Down
4367.58	Down
4480.23	Down
4511.73	Down

[truncated: 15 more sheets: Mouse 4_415, Mouse 4_470, Mouse 4_Event Trials, Mouse 5_415, Mouse 5_470, Mouse 5_Event Trials, Mouse 6_415, Mouse 6_470, Mouse 6_Event Trials, Mouse 7_415, Mouse 7_470, Mouse 7_Event Trials, Mouse 8_415, Mouse 8_470, Mouse 8_Event Trials]
