# Supplementary material for: Glutamatergic supramammillary nucleus neurons respond to threatening stressors and promote active coping
Source: eLife. 2024 Jun 3;12:RP90972. doi: 10.7554/eLife.90972 (PMC11147510; doi:10.7554/eLife.90972)
Supplement: Figure 3—source data 2. [file elife-90972-fig3-data2.xlsx]

## Sheet: Figure 3 H and I
	Figure 3 H and I. For each mouse, there are three worksheets with raw data (GCaMPs 470, Isosbestic 415, and timestamps for event trials)

## Sheet: Mouse 1_415
FrameCounter	Timestamp	Flags	Region0G
4502	3826.74	17	0.0433971
4504	3826.79	17	0.0434085
4506	3826.84	17	0.0434235
4508	3826.89	17	0.0434261
4510	3826.94	17	0.0433909
4512	3826.99	17	0.0433958
4514	3827.04	17	0.043443
4516	3827.09	17	0.043401
4518	3827.14	17	0.0433821
4520	3827.19	17	0.0433962
4522	3827.24	17	0.0433848
4524	3827.29	17	0.0434938
4526	3827.34	17	0.0434639
4528	3827.39	17	0.043544
4530	3827.44	17	0.0434746
4532	3827.49	17	0.0434365
4534	3827.54	17	0.0433795
4536	3827.59	17	0.043387
4538	3827.64	17	0.0433408
4540	3827.69	17	0.0433655
4542	3827.74	17	0.0433131
4544	3827.79	17	0.0433756
4546	3827.84	17	0.0433708
4548	3827.89	17	0.0433779
4550	3827.94	17	0.043331
4552	3827.99	17	0.043305
4554	3828.04	17	0.0433418
4556	3828.09	17	0.043345
4558	3828.14	17	0.0433115
4560	3828.19	17	0.0433626
4562	3828.24	17	0.0433454
4564	3828.29	17	0.043362
4566	3828.34	17	0.0433379
4568	3828.39	17	0.0433825
4570	3828.44	17	0.0433232
4572	3828.49	17	0.0433206
4574	3828.54	17	0.0433594
4576	3828.59	17	0.0433193
4578	3828.64	17	0.043361
4580	3828.69	17	0.0433004
4582	3828.74	17	0.0433066
4584	3828.79	17	0.043289
4586	3828.84	17	0.0433261
4588	3828.89	17	0.0433359
4590	3828.94	17	0.0433092
4592	3828.99	17	0.0432574
4594	3829.04	17	0.0433164
4596	3829.09	17	0.0432945
4598	3829.14	17	0.0433138
4600	3829.19	17	0.0433066
4602	3829.24	17	0.0433385
4604	3829.29	17	0.0433616
4606	3829.34	17	0.0433668
4608	3829.39	17	0.0434131
4610	3829.44	17	0.0434268
4612	3829.49	17	0.0434496
4614	3829.54	17	0.0434313
4616	3829.59	17	0.0434349
4618	3829.64	17	0.0434007
4620	3829.69	17	0.0434486
4622	3829.74	17	0.0434105
4624	3829.79	17	0.0433821
4626	3829.84	17	0.0433708
4628	3829.89	17	0.0434193
4630	3829.94	17	0.0434489
4632	3829.99	17	0.0434733
4634	3830.04	17	0.0434525
4636	3830.09	17	0.0434535
4638	3830.14	17	0.0434505
4640	3830.19	17	0.0434176
4642	3830.24	17	0.0434557
4644	3830.29	17	0.0433509
4646	3830.34	17	0.0433502
4648	3830.39	17	0.0434128
4650	3830.44	17	0.0434362
4652	3830.49	17	0.0433183
4654	3830.54	17	0.0433795
4656	3830.59	17	0.0433929
4658	3830.64	17	0.0433356
4660	3830.69	17	0.0433392
4662	3830.74	17	0.0433525
4664	3830.79	17	0.0433678
4666	3830.84	17	0.0434059
4668	3830.89	17	0.0433756
4670	3830.94	17	0.04339
4672	3830.99	17	0.0434323
4674	3831.04	17	0.04346
4676	3831.09	17	0.0434903
4678	3831.14	17	0.0434961
4680	3831.19	17	0.043416
4682	3831.24	17	0.0434033
4684	3831.29	17	0.0434303
4686	3831.34	17	0.0434033
4688	3831.39	17	0.0433903
4690	3831.44	17	0.0433935
4692	3831.49	17	0.0433323
4694	3831.54	17	0.0433362
4696	3831.59	17	0.043331
4698	3831.64	17	0.0433424
4700	3831.69	17	0.0433261
4702	3831.74	17	0.0433418
4704	3831.79	17	0.0432701
4706	3831.84	17	0.0433655
4708	3831.89	17	0.0432802
4710	3831.94	17	0.0433027
4712	3831.99	17	0.0432893
4714	3832.04	17	0.043261
4716	3832.09	17	0.0432903
4718	3832.14	17	0.0433538
4720	3832.19	17	0.0432959
4722	3832.24	17	0.0433134
4724	3832.29	17	0.0433186
4726	3832.34	17	0.0432695
4728	3832.39	17	0.0433138
4730	3832.44	17	0.0432649
4732	3832.49	17	0.0433063
4734	3832.54	17	0.0432525
4736	3832.59	17	0.0433196
4738	3832.64	17	0.0432008
4740	3832.69	17	0.0432805
4742	3832.74	17	0.0431952
4744	3832.79	17	0.0432542
4746	3832.84	17	0.0432594
4748	3832.89	17	0.0432457
4750	3832.94	17	0.0432678
4752	3832.99	17	0.0432503
4754	3833.04	17	0.0431855
4756	3833.09	17	0.0432353
4758	3833.14	17	0.0432936
4760	3833.19	17	0.0432109
4762	3833.24	17	0.0431483
4764	3833.29	17	0.0432581
4766	3833.34	17	0.0432613
4768	3833.39	17	0.0431636
4770	3833.44	17	0.0432073
4772	3833.49	17	0.0431171
4774	3833.54	17	0.0432017
4776	3833.59	17	0.0431959
4778	3833.64	17	0.0431561
4780	3833.69	17	0.0431959
4782	3833.74	17	0.0431995
4784	3833.79	17	0.043163
4786	3833.84	17	0.0432236
4788	3833.89	17	0.043261
4790	3833.94	17	0.043119
4792	3833.99	17	0.0431848
4794	3834.04	17	0.0431923
4796	3834.09	17	0.0432262
4798	3834.14	17	0.0432242
4800	3834.19	17	0.043178
4802	3834.24	17	0.0432096
4804	3834.29	17	0.0431034
4806	3834.34	17	0.0430952
4808	3834.39	17	0.0431558
4810	3834.44	17	0.0431229
4812	3834.49	17	0.0430822
4814	3834.54	17	0.0431513
4816	3834.59	17	0.043118
4818	3834.64	17	0.0431474
4820	3834.69	17	0.0432109
4822	3834.74	17	0.0431675
4824	3834.79	17	0.0432574
4826	3834.84	17	0.0432591
4828	3834.89	17	0.0431701
4830	3834.94	17	0.0432525
4832	3834.99	17	0.0431695
4834	3835.04	17	0.0432252
4836	3835.09	17	0.0432314
4838	3835.14	17	0.0432209
4840	3835.19	17	0.043246
4842	3835.24	17	0.0431776
4844	3835.29	17	0.0431412
4846	3835.34	17	0.0431594
4848	3835.39	17	0.0432366
4850	3835.44	17	0.0432236
4852	3835.49	17	0.0431845
4854	3835.54	17	0.043189
4856	3835.59	17	0.0431714
4858	3835.64	17	0.043147
4860	3835.69	17	0.043146
4862	3835.74	17	0.0431711
4864	3835.79	17	0.0431809
4866	3835.84	17	0.0431438
4868	3835.89	17	0.043107
4870	3835.94	17	0.0430444
4872	3835.99	17	0.0430708
4874	3836.04	17	0.0430959
4876	3836.09	17	0.0431379
4878	3836.14	17	0.0430803
4880	3836.19	17	0.0431438
4882	3836.24	17	0.0430975
4884	3836.29	17	0.0431076
4886	3836.34	17	0.0431031
4888	3836.39	17	0.0431614
4890	3836.44	17	0.0431737
4892	3836.49	17	0.0431005
4894	3836.54	17	0.0430975
4896	3836.59	17	0.0431021
4898	3836.64	17	0.0430624
4900	3836.69	17	0.0430878
4902	3836.74	17	0.0431265
4904	3836.79	17	0.0430985
4906	3836.84	17	0.0431167
4908	3836.89	17	0.0431304
4910	3836.94	17	0.0431265
4912	3836.99	17	0.0430933
4914	3837.04	17	0.0430868
4916	3837.09	17	0.0431154
4918	3837.14	17	0.0431516
4920	3837.19	17	0.0431428
4922	3837.24	17	0.0431001
4924	3837.29	17	0.0431128
4926	3837.34	17	0.0431311
4928	3837.39	17	0.0430858
4930	3837.44	17	0.0430838
4932	3837.49	17	0.043048
4934	3837.54	17	0.0431317
4936	3837.59	17	0.0431483
4938	3837.64	17	0.0431066
4940	3837.69	17	0.0431034
4942	3837.74	17	0.0429917
4944	3837.79	17	0.0431018
4946	3837.84	17	0.0431096
4948	3837.89	17	0.0431285
4950	3837.94	17	0.0430711
4952	3837.99	17	0.0430405
4954	3838.04	17	0.0430516
4956	3838.09	17	0.0430474
4958	3838.14	17	0.0430438
4960	3838.19	17	0.0429757
4962	3838.24	17	0.0430865
4964	3838.29	17	0.0430249
4966	3838.34	17	0.042991
4968	3838.39	17	0.0430409
4970	3838.44	17	0.0430116
4972	3838.49	17	0.0429575
4974	3838.54	17	0.0430506
4976	3838.59	17	0.0430923
4978	3838.64	17	0.0430822
4980	3838.69	17	0.043034
4982	3838.74	17	0.0430832
4984	3838.79	17	0.0429855
4986	3838.84	17	0.0430047
4988	3838.89	17	0.0429656
4990	3838.94	17	0.0430311
4992	3838.99	17	0.0429591
4994	3839.04	17	0.0429718
4996	3839.09	17	0.0429565
4998	3839.14	17	0.0430203
5000	3839.19	17	0.0430119
5002	3839.24	17	0.0429979
5004	3839.29	17	0.0430278
5006	3839.34	17	0.0430809
5008	3839.39	17	0.0431431
5010	3839.44	17	0.0430786
5012	3839.49	17	0.0430757
5014	3839.54	17	0.0430601
5016	3839.59	17	0.0430021
5018	3839.64	17	0.0429995
5020	3839.69	17	0.0430565
5022	3839.74	17	0.0430874
5024	3839.79	17	0.0430379
5026	3839.84	17	0.0430848
5028	3839.89	17	0.0430842
5030	3839.94	17	0.0430806
5032	3839.99	17	0.0430174
5034	3840.04	17	0.0430773
5036	3840.09	17	0.0430265
5038	3840.14	17	0.0429526
5040	3840.19	17	0.0429744
5042	3840.24	17	0.0429712
5044	3840.29	17	0.043021
5046	3840.34	17	0.0429839
5048	3840.39	17	0.0430571
5050	3840.44	17	0.042994
5052	3840.49	17	0.0429673
5054	3840.54	17	0.0429927
5056	3840.59	17	0.0429497
5058	3840.64	17	0.0429803
5060	3840.69	17	0.0429832
5062	3840.74	17	0.0429809
5064	3840.79	17	0.0429842
5066	3840.84	17	0.0429086
5068	3840.89	17	0.043033
5070	3840.94	17	0.0430702
5072	3840.99	17	0.042979
5074	3841.04	17	0.042977
5076	3841.09	17	0.0429927
5078	3841.14	17	0.0429637
5080	3841.19	17	0.0430513
5082	3841.24	17	0.0430275
5084	3841.29	17	0.0430265
5086	3841.34	17	0.0430711
5088	3841.39	17	0.0429764
5090	3841.44	17	0.0430119
5092	3841.49	17	0.042991
5094	3841.54	17	0.0429982
5096	3841.59	17	0.0429904
5098	3841.64	17	0.0430106
5100	3841.69	17	0.0430568
5102	3841.74	17	0.0429738
5104	3841.79	17	0.0429448
5106	3841.84	17	0.0430047
5108	3841.89	17	0.0429868
5110	3841.94	17	0.0429415
5112	3841.99	17	0.042965
5114	3842.04	17	0.0429308
5116	3842.09	17	0.0429497
5118	3842.14	17	0.0430269
5120	3842.19	17	0.0429529
5122	3842.24	17	0.0429269
5124	3842.29	17	0.0429477
5126	3842.34	17	0.0429523
5128	3842.39	17	0.042949
5130	3842.44	17	0.0429637
5132	3842.49	17	0.0429425
5134	3842.54	17	0.0429839
5136	3842.59	17	0.0429259
5138	3842.64	17	0.0429832
5140	3842.69	17	0.0428933
5142	3842.74	17	0.0429005
5144	3842.79	17	0.0428731
5146	3842.84	17	0.0428891
5148	3842.89	17	0.0428484
5150	3842.94	17	0.0428393
5152	3842.99	17	0.0428217
5154	3843.04	17	0.0428898
5156	3843.09	17	0.0428748
5158	3843.14	17	0.042908
5160	3843.19	17	0.0429979
5162	3843.24	17	0.0429301
5164	3843.29	17	0.0428878
5166	3843.34	17	0.0429344
5168	3843.39	17	0.0429637
5170	3843.44	17	0.042906
5172	3843.49	17	0.0429191
5174	3843.54	17	0.0429259
5176	3843.59	17	0.0428907
5178	3843.64	17	0.042992
5180	3843.69	17	0.0429461
5182	3843.74	17	0.0429448
5184	3843.79	17	0.0429266
5186	3843.84	17	0.0429581
5188	3843.89	17	0.0429262
5190	3843.94	17	0.0429259
5192	3843.99	17	0.0428748
5194	3844.04	17	0.0428481
5196	3844.09	17	0.0428862
5198	3844.14	17	0.0428989
5200	3844.19	17	0.0429161
5202	3844.24	17	0.0428709
5204	3844.29	17	0.0428692
5206	3844.34	17	0.0428718
5208	3844.39	17	0.0428455
5210	3844.44	17	0.042837
5212	3844.49	17	0.0428911
5214	3844.54	17	0.04285
5216	3844.59	17	0.0428145
5218	3844.64	17	0.042864
5220	3844.69	17	0.0429005
5222	3844.74	17	0.0428666
5224	3844.79	17	0.0428617
5226	3844.84	17	0.0428249
5228	3844.89	17	0.042866
5230	3844.94	17	0.0428546
5232	3844.99	17	0.0428911
5234	3845.04	17	0.0429028
5236	3845.09	17	0.0429376
5238	3845.14	17	0.0428898
5240	3845.19	17	0.0428184
5242	3845.24	17	0.0428298
5244	3845.29	17	0.0428712
5246	3845.34	17	0.042823
5248	3845.39	17	0.0428578
5250	3845.44	17	0.0427787
5252	3845.49	17	0.0428246
5254	3845.54	17	0.0428249
5256	3845.59	17	0.0428777
5258	3845.64	17	0.0428025
5260	3845.69	17	0.0428425
5262	3845.74	17	0.0428126
5264	3845.79	17	0.0427921
5266	3845.84	17	0.0427934
5268	3845.89	17	0.0428666
5270	3845.94	17	0.0428149
5272	3845.99	17	0.0428009
5274	3846.04	17	0.0427768
5276	3846.09	17	0.042836
5278	3846.14	17	0.0427797
5280	3846.19	17	0.0428197
5282	3846.24	17	0.0428686
5284	3846.29	17	0.0428517
5286	3846.34	17	0.0427201
5288	3846.39	17	0.042807
5290	3846.44	17	0.0427797
5292	3846.49	17	0.0427979
5294	3846.54	17	0.0427979
5296	3846.59	17	0.0428233
5298	3846.64	17	0.04278
5300	3846.69	17	0.0427673
5302	3846.74	17	0.0426641
5304	3846.79	17	0.0426719
5306	3846.84	17	0.0427413
5308	3846.89	17	0.0427549
5310	3846.94	17	0.0427022
5312	3846.99	17	0.042723
5314	3847.04	17	0.0427803
5316	3847.09	17	0.0426898
5318	3847.14	17	0.042738
5320	3847.19	17	0.0427321
5322	3847.24	17	0.0427992
5324	3847.29	17	0.0427549
5326	3847.34	17	0.0427709
5328	3847.39	17	0.0427797
5330	3847.44	17	0.0427797
5332	3847.49	17	0.0427279
5334	3847.54	17	0.0428334
5336	3847.59	17	0.0428464
5338	3847.64	17	0.0428429
5340	3847.69	17	0.0427937
5342	3847.74	17	0.0427969
5344	3847.79	17	0.042835
5346	3847.84	17	0.0428122
5348	3847.89	17	0.0427621
5350	3847.94	17	0.0427797
5352	3847.99	17	0.0427917
5354	3848.04	17	0.0428165
5356	3848.09	17	0.0427129
5358	3848.14	17	0.0427325
5360	3848.19	17	0.0427839
5362	3848.24	17	0.0427159
5364	3848.29	17	0.0427494
5366	3848.34	17	0.0428041
5368	3848.39	17	0.0426921
5370	3848.44	17	0.0426778
5372	3848.49	17	0.0427243
5374	3848.54	17	0.0426826
5376	3848.59	17	0.0426823
5378	3848.64	17	0.0427461
5380	3848.69	17	0.0427426
5382	3848.74	17	0.0426416
5384	3848.79	17	0.042682
5386	3848.84	17	0.0426709
5388	3848.89	17	0.0425941
5390	3848.94	17	0.0426608
5392	3848.99	17	0.0425986
5394	3849.04	17	0.0425797
5396	3849.09	17	0.0426657
5398	3849.14	17	0.0426836
5400	3849.19	17	0.0427282
5402	3849.24	17	0.0427452
5404	3849.29	17	0.0427536
5406	3849.34	17	0.0427738
5408	3849.39	17	0.0427071
5410	3849.44	17	0.0427474
5412	3849.49	17	0.0427185
5414	3849.54	17	0.0426986
5416	3849.59	17	0.0426445
5418	3849.64	17	0.0427217
5420	3849.69	17	0.042668
5422	3849.74	17	0.0427214
5424	3849.79	17	0.0427146
5426	3849.84	17	0.0427113
5428	3849.89	17	0.0427067
5430	3849.94	17	0.0426491
5432	3849.99	17	0.0427077
5434	3850.04	17	0.0426507
5436	3850.09	17	0.042781
5438	3850.14	17	0.0427719
5440	3850.19	17	0.0428119
5442	3850.24	17	0.0428083
5444	3850.29	17	0.042766
5446	3850.34	17	0.0427865
5448	3850.39	17	0.0427963
5450	3850.44	17	0.0427598
5452	3850.49	17	0.0427989
5454	3850.54	17	0.0427377
5456	3850.59	17	0.0428067
5458	3850.64	17	0.0427969
5460	3850.69	17	0.0427712
5462	3850.74	17	0.0427188
5464	3850.79	17	0.0427426
5466	3850.84	17	0.0427846
5468	3850.89	17	0.0427986
5470	3850.94	17	0.0427514
5472	3850.99	17	0.0427702
5474	3851.04	17	0.0427207
5476	3851.09	17	0.042723
5478	3851.14	17	0.0426048
5480	3851.19	17	0.0426918
5482	3851.24	17	0.0426309
5484	3851.29	17	0.0426309
5486	3851.34	17	0.042667
5488	3851.39	17	0.0426351
5490	3851.44	17	0.0426624
5492	3851.49	17	0.0426992
5494	3851.54	17	0.0426022
5496	3851.59	17	0.0425976
5498	3851.64	17	0.0427126
5500	3851.69	17	0.0427172
5502	3851.74	17	0.04274
5504	3851.79	17	0.0426706
5506	3851.84	17	0.0427019
5508	3851.89	17	0.0427269
5510	3851.94	17	0.0426764
5512	3851.99	17	0.0426735
5514	3852.04	17	0.0426618
5516	3852.09	17	0.0426289
5518	3852.14	17	0.0426576
5520	3852.19	17	0.0426931
5522	3852.24	17	0.0426892
5524	3852.29	17	0.0426781
5526	3852.34	17	0.0426608
5528	3852.39	17	0.0426973
5530	3852.44	17	0.0427406
5532	3852.49	17	0.0426683
5534	3852.54	17	0.0427032
5536	3852.59	17	0.0427146
5538	3852.64	17	0.0426921
5540	3852.69	17	0.0427058
5542	3852.74	17	0.042739
5544	3852.79	17	0.0426908
5546	3852.84	17	0.0426501
5548	3852.89	17	0.0427022
5550	3852.94	17	0.0427269
5552	3852.99	17	0.042637
5554	3853.04	17	0.0426266
5556	3853.09	17	0.0426771
5558	3853.14	17	0.0426162
5560	3853.19	17	0.0426572
5562	3853.24	17	0.0426885
5564	3853.29	17	0.0426683
5566	3853.34	17	0.0426927
5568	3853.39	17	0.0426354
5570	3853.44	17	0.042725
5572	3853.49	17	0.0427227
5574	3853.54	17	0.0427172
5576	3853.59	17	0.0426992
5578	3853.64	17	0.0426892
5580	3853.69	17	0.0426758
5582	3853.74	17	0.0427025
5584	3853.79	17	0.0426732
5586	3853.84	17	0.0426426
5588	3853.89	17	0.0427618
5590	3853.94	17	0.0426911
5592	3853.99	17	0.0426237
5594	3854.04	17	0.0426185
5596	3854.09	17	0.0426706
5598	3854.14	17	0.0425732
5600	3854.19	17	0.0426468
5602	3854.24	17	0.0426315
5604	3854.29	17	0.0426185
5606	3854.34	17	0.0426081
5608	3854.39	17	0.0426315
5610	3854.44	17	0.0425563
5612	3854.49	17	0.0425862
5614	3854.54	17	0.042525
5616	3854.59	17	0.0426029
5618	3854.64	17	0.0425534
5620	3854.69	17	0.0425149
5622	3854.74	17	0.0425739
5624	3854.79	17	0.0425814
5626	3854.84	17	0.0426501
5628	3854.89	17	0.0426077
5630	3854.94	17	0.042539
5632	3854.99	17	0.0425442
5634	3855.04	17	0.0425227
5636	3855.09	17	0.0425253
5638	3855.14	17	0.0424941
5640	3855.19	17	0.0425276
5642	3855.24	17	0.0425804
5644	3855.29	17	0.0425576
5646	3855.34	17	0.0425615
5648	3855.39	17	0.0425638
5650	3855.44	17	0.0425911
5652	3855.49	17	0.0426224
5654	3855.54	17	0.0425856
5656	3855.59	17	0.0426543
5658	3855.64	17	0.0426683
5660	3855.69	17	0.0426585
5662	3855.74	17	0.0426657
5664	3855.79	17	0.0427579
5666	3855.84	17	0.0427185
5668	3855.89	17	0.0427188
5670	3855.94	17	0.0426914
5672	3855.99	17	0.0426631
5674	3856.04	17	0.042737
5676	3856.09	17	0.0427087
5678	3856.14	17	0.0426797
5680	3856.19	17	0.0426012
5682	3856.24	17	0.0426133
5684	3856.29	17	0.0426843
5686	3856.34	17	0.0426494
5688	3856.39	17	0.0426139
5690	3856.44	17	0.0426817
5692	3856.49	17	0.0425947
5694	3856.54	17	0.0426514
5696	3856.59	17	0.0425472
5698	3856.64	17	0.0426087
5700	3856.69	17	0.0426256
5702	3856.74	17	0.0426348
5704	3856.79	17	0.0426162
5706	3856.84	17	0.0427162
5708	3856.89	17	0.042655
5710	3856.94	17	0.0426699
5712	3856.99	17	0.0425761
5714	3857.04	17	0.0426032
5716	3857.09	17	0.042668
5718	3857.14	17	0.0426338
5720	3857.19	17	0.0426348
5722	3857.24	17	0.0425934
5724	3857.29	17	0.0425393
5726	3857.34	17	0.0425719
5728	3857.39	17	0.0426012
5730	3857.44	17	0.0426852
5732	3857.49	17	0.04264
5734	3857.54	17	0.0425908
5736	3857.59	17	0.0426507
5738	3857.64	17	0.0426006
5740	3857.69	17	0.0426126
5742	3857.74	17	0.0425918
5744	3857.79	17	0.0426152
5746	3857.84	17	0.0425703
5748	3857.89	17	0.0426266
5750	3857.94	17	0.0426432
5752	3857.99	17	0.0426061
5754	3858.04	17	0.0426129
5756	3858.09	17	0.0425729
5758	3858.14	17	0.0425306
5760	3858.19	17	0.0425569
5762	3858.24	17	0.0425664
5764	3858.29	17	0.0426094
5766	3858.34	17	0.0425608
5768	3858.39	17	0.0425928
5770	3858.44	17	0.0425543
5772	3858.49	17	0.0425091
5774	3858.54	17	0.042511
5776	3858.59	17	0.0425354
5778	3858.64	17	0.0424495
5780	3858.69	17	0.0425003
5782	3858.74	17	0.0425374
5784	3858.79	17	0.0424465
5786	3858.84	17	0.0424508
5788	3858.89	17	0.0425123
5790	3858.94	17	0.0425201
5792	3858.99	17	0.0424625
5794	3859.04	17	0.042468
5796	3859.09	17	0.0424198
5798	3859.14	17	0.042426
5800	3859.19	17	0.042398
5802	3859.24	17	0.0423736
5804	3859.29	17	0.042453
5806	3859.34	17	0.0424537
5808	3859.39	17	0.0424667
5810	3859.44	17	0.0424325
5812	3859.49	17	0.0424475
5814	3859.54	17	0.0424859
5816	3859.59	17	0.0425198
5818	3859.64	17	0.0425042
5820	3859.69	17	0.0424527
5822	3859.74	17	0.0425827
5824	3859.79	17	0.0425273
5826	3859.84	17	0.0426064
5828	3859.89	17	0.0425517
5830	3859.94	17	0.0425576
5832	3859.99	17	0.0424986
5834	3860.04	17	0.0425058
5836	3860.09	17	0.0425169
5838	3860.14	17	0.0425459
5840	3860.19	17	0.0425371
5842	3860.24	17	0.0424996
5844	3860.29	17	0.0424925
5846	3860.34	17	0.0425436
5848	3860.39	17	0.0425159
5850	3860.44	17	0.0425667
5852	3860.49	17	0.0425514
5854	3860.54	17	0.0425869
5856	3860.59	17	0.0425921
5858	3860.64	17	0.04257
5860	3860.69	17	0.0425651
5862	3860.74	17	0.0425781
5864	3860.79	17	0.0425501
5866	3860.84	17	0.0425592
5868	3860.89	17	0.0425182
5870	3860.94	17	0.0425224
5872	3860.99	17	0.0424501
5874	3861.04	17	0.0424306
5876	3861.09	17	0.0424703
5878	3861.14	17	0.0424361
5880	3861.19	17	0.0424563
5882	3861.24	17	0.0424452
5884	3861.29	17	0.042483
5886	3861.34	17	0.0425068
5888	3861.39	17	0.0424413
5890	3861.44	17	0.0424348
5892	3861.49	17	0.0424534
5894	3861.54	17	0.042526
5896	3861.59	17	0.0424667
5898	3861.64	17	0.0425159
5900	3861.69	17	0.0424553
5902	3861.74	17	0.0424475
5904	3861.79	17	0.0424618
5906	3861.84	17	0.0423944
5908	3861.89	17	0.0424439
5910	3861.94	17	0.0424345
5912	3861.99	17	0.0423935
5914	3862.04	17	0.0424296
5916	3862.09	17	0.0424895
5918	3862.14	17	0.0424677
5920	3862.19	17	0.0424566
5922	3862.24	17	0.0424921
5924	3862.29	17	0.0425035
5926	3862.34	17	0.0425928
5928	3862.39	17	0.0426169
5930	3862.44	17	0.0425335
5932	3862.49	17	0.0425022
5934	3862.54	17	0.0424791
5936	3862.59	17	0.0424824
5938	3862.64	17	0.0424237
5940	3862.69	17	0.0424462
5942	3862.74	17	0.0424739
5944	3862.79	17	0.0424586
5946	3862.84	17	0.0424136
5948	3862.89	17	0.0424781
5950	3862.94	17	0.0424788
5952	3862.99	17	0.0424143
5954	3863.04	17	0.0424837
5956	3863.09	17	0.0424062
5958	3863.14	17	0.0423811
5960	3863.19	17	0.0424413
5962	3863.24	17	0.0423948
5964	3863.29	17	0.0423645
5966	3863.34	17	0.0424215
5968	3863.39	17	0.0424114
5970	3863.44	17	0.0423801
5972	3863.49	17	0.0424192
5974	3863.54	17	0.0423684
5976	3863.59	17	0.0424403
5978	3863.64	17	0.0424211
5980	3863.69	17	0.0423843
5982	3863.74	17	0.0424312
5984	3863.79	17	0.0424237
5986	3863.84	17	0.0424
5988	3863.89	17	0.042384
5990	3863.94	17	0.0423879
5992	3863.99	17	0.0423716
5994	3864.04	17	0.0424097
5996	3864.09	17	0.0424475
5998	3864.14	17	0.0424309
6000	3864.19	17	0.0424182
6002	3864.24	17	0.0424159
6004	3864.29	17	0.0423811
6006	3864.34	17	0.0424325
6008	3864.39	17	0.0423915
6010	3864.44	17	0.0424739
6012	3864.49	17	0.0424026
6014	3864.54	17	0.0423837
6016	3864.59	17	0.0423922
6018	3864.64	17	0.0423814
6020	3864.69	17	0.0423869
6022	3864.74	17	0.0424452
6024	3864.79	17	0.042369
6026	3864.84	17	0.0423456
6028	3864.89	17	0.0423277
6030	3864.94	17	0.0423622
6032	3864.99	17	0.0423485
6034	3865.04	17	0.0423912
6036	3865.09	17	0.0423299
6038	3865.14	17	0.0423648
6040	3865.19	17	0.0423641
6042	3865.24	17	0.0423339
6044	3865.29	17	0.042372
6046	3865.34	17	0.0423586
6048	3865.39	17	0.0423335
6050	3865.44	17	0.0423019
6052	3865.49	17	0.0423524
6054	3865.54	17	0.0423531
6056	3865.59	17	0.0423723
6058	3865.64	17	0.0423544
6060	3865.69	17	0.0423264
6062	3865.74	17	0.0423518
6064	3865.79	17	0.0423922
6066	3865.84	17	0.0424088
6068	3865.89	17	0.0423996
6070	3865.94	17	0.0424022
6072	3865.99	17	0.0423469
6074	3866.04	17	0.0423488
6076	3866.09	17	0.0423238
6078	3866.14	17	0.0423306
6080	3866.19	17	0.0423202
6082	3866.24	17	0.0422739
6084	3866.29	17	0.042342
6086	3866.34	17	0.0423296
6088	3866.39	17	0.0422593
6090	3866.44	17	0.0423199
6092	3866.49	17	0.0422902
6094	3866.54	17	0.0423026
6096	3866.59	17	0.0422791
6098	3866.64	17	0.0423075
6100	3866.69	17	0.0423459
6102	3866.74	17	0.0423055
6104	3866.79	17	0.0423628
6106	3866.84	17	0.0423908
6108	3866.89	17	0.0423703
6110	3866.94	17	0.042371
6112	3866.99	17	0.0423759
6114	3867.04	17	0.0423036
6116	3867.09	17	0.0423638
6118	3867.14	17	0.0423531
6120	3867.19	17	0.0422463
6122	3867.24	17	0.0422905
6124	3867.29	17	0.0423485
6126	3867.34	17	0.0422971
6128	3867.39	17	0.0422358
6130	3867.44	17	0.0422971
6132	3867.49	17	0.0422485
6134	3867.54	17	0.0422899
6136	3867.59	17	0.0423052
6138	3867.64	17	0.0423332
6140	3867.69	17	0.0423475
6142	3867.74	17	0.0422866
6144	3867.79	17	0.0422961
6146	3867.84	17	0.0422612
6148	3867.89	17	0.0422508
6150	3867.94	17	0.0423055
6152	3867.99	17	0.0422883
6154	3868.04	17	0.0422616
6156	3868.09	17	0.0422681
6158	3868.14	17	0.042243
6160	3868.19	17	0.042287
6162	3868.24	17	0.0422537
6164	3868.29	17	0.0423286
6166	3868.34	17	0.0422192
6168	3868.39	17	0.0423169
6170	3868.44	17	0.0422935
6172	3868.49	17	0.0422967
6174	3868.54	17	0.0422687
6176	3868.59	17	0.0422749
6178	3868.64	17	0.0422414
6180	3868.69	17	0.0422277
6182	3868.74	17	0.0423045
6184	3868.79	17	0.0422498
6186	3868.84	17	0.0422629
6188	3868.89	17	0.0422876
6190	3868.94	17	0.0422938
6192	3868.99	17	0.0422717
6194	3869.04	17	0.0422674
6196	3869.09	17	0.0422121
6198	3869.14	17	0.0422739
6200	3869.19	17	0.0423085
6202	3869.24	17	0.0422583
6204	3869.29	17	0.0422277
6206	3869.34	17	0.0422202
6208	3869.39	17	0.0422844
6210	3869.44	17	0.0422521
6212	3869.49	17	0.0422505
6214	3869.54	17	0.0422619
6216	3869.59	17	0.0421665
6218	3869.64	17	0.0422169
6220	3869.69	17	0.0422557
6222	3869.74	17	0.0422528
6224	3869.79	17	0.0422026
6226	3869.84	17	0.0422238
6228	3869.89	17	0.0422098
6230	3869.94	17	0.0422925
6232	3869.99	17	0.0422515
6234	3870.04	17	0.0423257
6236	3870.09	17	0.0422922
6238	3870.14	17	0.0422401
6240	3870.19	17	0.0422088
6242	3870.24	17	0.0422814
6244	3870.29	17	0.042258
6246	3870.34	17	0.0422889
6248	3870.39	17	0.0422352
6250	3870.44	17	0.0422437
6252	3870.49	17	0.0422381
6254	3870.54	17	0.0422088
6256	3870.59	17	0.042171
6258	3870.64	17	0.0421942
6260	3870.69	17	0.0421795
6262	3870.74	17	0.0421456
6264	3870.79	17	0.0421844
6266	3870.84	17	0.0421652
6268	3870.89	17	0.0421131
6270	3870.94	17	0.0421336
6272	3870.99	17	0.0421098
6274	3871.04	17	0.0421723
6276	3871.09	17	0.0421821
6278	3871.14	17	0.0422088
6280	3871.19	17	0.0421538
6282	3871.24	17	0.0421909
6284	3871.29	17	0.0422215
6286	3871.34	17	0.042142
6288	3871.39	17	0.0421743
6290	3871.44	17	0.0421613
6292	3871.49	17	0.042173
6294	3871.54	17	0.0422596
6296	3871.59	17	0.0421756
6298	3871.64	17	0.0422192
6300	3871.69	17	0.0423352
6302	3871.74	17	0.0423482
6304	3871.79	17	0.0422593
6306	3871.84	17	0.0422834
6308	3871.89	17	0.0422788
6310	3871.94	17	0.0422596
6312	3871.99	17	0.0422358
6314	3872.04	17	0.0422905
6316	3872.09	17	0.0422648
6318	3872.14	17	0.0422993
6320	3872.19	17	0.0422319
6322	3872.24	17	0.0422554
6324	3872.29	17	0.0422684
6326	3872.34	17	0.0422261
6328	3872.39	17	0.0422013
6330	3872.44	17	0.0422456
6332	3872.49	17	0.0422251
6334	3872.54	17	0.0422371
6336	3872.59	17	0.0422104
6338	3872.64	17	0.0421603
6340	3872.69	17	0.0422443
6342	3872.74	17	0.0421818
6344	3872.79	17	0.0422244
6346	3872.84	17	0.0422293
6348	3872.89	17	0.0421837
6350	3872.94	17	0.0421847
6352	3872.99	17	0.0422153
6354	3873.04	17	0.0422277
6356	3873.09	17	0.0422036
6358	3873.14	17	0.0422062
6360	3873.19	17	0.0422241
6362	3873.24	17	0.0421814
6364	3873.29	17	0.0421805
6366	3873.34	17	0.0421339
6368	3873.39	17	0.0422199
6370	3873.44	17	0.0421753
6372	3873.49	17	0.042245
6374	3873.54	17	0.0422534
6376	3873.59	17	0.042255
6378	3873.64	17	0.042216
6380	3873.69	17	0.0421928
6382	3873.74	17	0.0421867
6384	3873.79	17	0.0421551
6386	3873.84	17	0.0422088
6388	3873.89	17	0.0422296
6390	3873.94	17	0.0422098
6392	3873.99	17	0.0421906
6394	3874.04	17	0.0421837
6396	3874.09	17	0.0421782
6398	3874.14	17	0.0422658
6400	3874.19	17	0.0422332
6402	3874.24	17	0.0421717
6404	3874.29	17	0.0421482
6406	3874.34	17	0.0422052
6408	3874.39	17	0.0421534
6410	3874.44	17	0.0421235
6412	3874.49	17	0.0421678
6414	3874.54	17	0.0422228
6416	3874.59	17	0.0421873
6418	3874.64	17	0.0421544
6420	3874.69	17	0.042146
6422	3874.74	17	0.0421225
6424	3874.79	17	0.0421144
6426	3874.84	17	0.042187
6428	3874.89	17	0.0421101
6430	3874.94	17	0.0421359
6432	3874.99	17	0.0421863
6434	3875.04	17	0.0421098
6436	3875.09	17	0.042074
6438	3875.14	17	0.0421847
6440	3875.19	17	0.0421837
6442	3875.24	17	0.042157
6444	3875.29	17	0.0421769
6446	3875.34	17	0.0421114
6448	3875.39	17	0.0421284
6450	3875.44	17	0.0421219
6452	3875.49	17	0.0421118
6454	3875.54	17	0.042142
6456	3875.59	17	0.0421118
6458	3875.64	17	0.0420733
6460	3875.69	17	0.0421105
6462	3875.74	17	0.0421352
6464	3875.79	17	0.0420929
6466	3875.84	17	0.042101
6468	3875.89	17	0.0421622
6470	3875.94	17	0.0420789
6472	3875.99	17	0.042086
6474	3876.04	17	0.0421297
6476	3876.09	17	0.0421202
6478	3876.14	17	0.042072
6480	3876.19	17	0.0420903
6482	3876.24	17	0.0421144
6484	3876.29	17	0.0421124
6486	3876.34	17	0.0420782
6488	3876.39	17	0.0421059
6490	3876.44	17	0.0421033
6492	3876.49	17	0.0420899
6494	3876.54	17	0.0420711
6496	3876.59	17	0.0420935
6498	3876.64	17	0.0420844
6500	3876.69	17	0.0421023
6502	3876.74	17	0.0421075
6504	3876.79	17	0.0421173
6506	3876.84	17	0.0420766
6508	3876.89	17	0.0420603
6510	3876.94	17	0.0421134
6512	3876.99	17	0.0420932
6514	3877.04	17	0.0421153
6516	3877.09	17	0.0421004
6518	3877.14	17	0.0420782
6520	3877.19	17	0.0420704
6522	3877.24	17	0.042088
6524	3877.29	17	0.0420401
6526	3877.34	17	0.0420785
6528	3877.39	17	0.042075
6530	3877.44	17	0.0420665
6532	3877.49	17	0.0420089
6534	3877.54	17	0.0420655
6536	3877.59	17	0.0420636
6538	3877.64	17	0.0420271
6540	3877.69	17	0.0420359
6542	3877.74	17	0.0420395
6544	3877.79	17	0.0420131
6546	3877.84	17	0.0420053
6548	3877.89	17	0.0419929
6550	3877.94	17	0.0420352
6552	3877.99	17	0.0420505
6554	3878.04	17	0.0420255
6556	3878.09	17	0.042129
6558	3878.14	17	0.0420222
6560	3878.19	17	0.042072
6562	3878.24	17	0.0419659
6564	3878.29	17	0.0420316
6566	3878.34	17	0.0420176
6568	3878.39	17	0.0420398
6570	3878.44	17	0.0420212
6572	3878.49	17	0.0420326
6574	3878.54	17	0.0421333
6576	3878.59	17	0.0421593
6578	3878.64	17	0.0420395
6580	3878.69	17	0.0419724
6582	3878.74	17	0.041987
6584	3878.79	17	0.0420183
6586	3878.84	17	0.0419916
6588	3878.89	17	0.0419812
6590	3878.94	17	0.0420059
6592	3878.99	17	0.0420453
6594	3879.04	17	0.0419577
6596	3879.09	17	0.0419613
6598	3879.14	17	0.0419453
6600	3879.19	17	0.041961
6602	3879.24	17	0.0419812
6604	3879.29	17	0.0419489
6606	3879.34	17	0.0419359
6608	3879.39	17	0.0419704
6610	3879.44	17	0.0418897
6612	3879.49	17	0.0419786
6614	3879.54	17	0.0419525
6616	3879.59	17	0.0419561
6618	3879.64	17	0.0419401
6620	3879.69	17	0.0419118
6622	3879.74	17	0.0418916
6624	3879.79	17	0.0419528
6626	3879.84	17	0.04186
6628	3879.89	17	0.041946
6630	3879.94	17	0.041917
6632	3879.99	17	0.0418988
6634	3880.04	17	0.0418721
6636	3880.09	17	0.0419239
6638	3880.14	17	0.0418968
6640	3880.19	17	0.0419252
6642	3880.24	17	0.0419519
6644	3880.29	17	0.041944
6646	3880.34	17	0.0419183
6648	3880.39	17	0.0419594
6650	3880.44	17	0.0419219
6652	3880.49	17	0.0419515
6654	3880.54	17	0.041933
6656	3880.59	17	0.0419499
6658	3880.64	17	0.0419317
6660	3880.69	17	0.0419776
6662	3880.74	17	0.04199
6664	3880.79	17	0.0420102
6666	3880.84	17	0.0419545
6668	3880.89	17	0.0419274
6670	3880.94	17	0.0418887
6672	3880.99	17	0.0419646
6674	3881.04	17	0.0418845
6676	3881.09	17	0.0419287
6678	3881.14	17	0.0418698
6680	3881.19	17	0.04186
6682	3881.24	17	0.0419278
6684	3881.29	17	0.0418903
6686	3881.34	17	0.0419056
6688	3881.39	17	0.0418942
6690	3881.44	17	0.0418538
6692	3881.49	17	0.0418516
6694	3881.54	17	0.0419203
6696	3881.59	17	0.0418988
6698	3881.64	17	0.0418998
6700	3881.69	17	0.0419349
6702	3881.74	17	0.0419125
6704	3881.79	17	0.0419545
6706	3881.84	17	0.0419216
6708	3881.89	17	0.0419975
6710	3881.94	17	0.0419743
6712	3881.99	17	0.041976
6714	3882.04	17	0.0419203
6716	3882.09	17	0.0419131
6718	3882.14	17	0.0419372
6720	3882.19	17	0.0419079
6722	3882.24	17	0.0418945
6724	3882.29	17	0.0418656
6726	3882.34	17	0.0419304
6728	3882.39	17	0.0418766
6730	3882.44	17	0.0418893
6732	3882.49	17	0.0418568
6734	3882.54	17	0.0418906
6736	3882.59	17	0.0418835
6738	3882.64	17	0.0418929
6740	3882.69	17	0.0418493
6742	3882.74	17	0.0418825
6744	3882.79	17	0.0418786
6746	3882.84	17	0.041818
6748	3882.89	17	0.0419239
6750	3882.94	17	0.0418382
6752	3882.99	17	0.0418236
6754	3883.04	17	0.0418369
6756	3883.09	17	0.0418379
6758	3883.14	17	0.0418226
6760	3883.19	17	0.0418346
6762	3883.24	17	0.041845
6764	3883.29	17	0.0418483
6766	3883.34	17	0.0418379
6768	3883.39	17	0.0418411
6770	3883.44	17	0.0418525
6772	3883.49	17	0.0417907
6774	3883.54	17	0.041804
6776	3883.59	17	0.0418926
6778	3883.64	17	0.0419226
6780	3883.69	17	0.0419147
6782	3883.74	17	0.0419079
6784	3883.79	17	0.0419131
6786	3883.84	17	0.041918
6788	3883.89	17	0.0418789
6790	3883.94	17	0.041849
6792	3883.99	17	0.0418818
6794	3884.04	17	0.0418861
6796	3884.09	17	0.0418858
6798	3884.14	17	0.0418551
6800	3884.19	17	0.0418363
6802	3884.24	17	0.0418444
6804	3884.29	17	0.0418916
6806	3884.34	17	0.0418773
6808	3884.39	17	0.0418548
6810	3884.44	17	0.0418236
6812	3884.49	17	0.0418043
6814	3884.54	17	0.0418151
6816	3884.59	17	0.0418323
6818	3884.64	17	0.0417982
6820	3884.69	17	0.0418125
6822	3884.74	17	0.0417939
6824	3884.79	17	0.0417653
6826	3884.84	17	0.0417841
6828	3884.89	17	0.0418063
6830	3884.94	17	0.0417835
6832	3884.99	17	0.0418242
6834	3885.04	17	0.0417815
6836	3885.09	17	0.0417698
6838	3885.14	17	0.0417092
6840	3885.19	17	0.0417757
6842	3885.24	17	0.0417646
6844	3885.29	17	0.0417978
6846	3885.34	17	0.0417685
6848	3885.39	17	0.0417995
6850	3885.44	17	0.0418236
6852	3885.49	17	0.0418297
6854	3885.54	17	0.0418196
6856	3885.59	17	0.0418109
6858	3885.64	17	0.0417851
6860	3885.69	17	0.0418196
6862	3885.74	17	0.0418538
6864	3885.79	17	0.0418258
6866	3885.84	17	0.0418043
6868	3885.89	17	0.0418177
6870	3885.94	17	0.0417806
6872	3885.99	17	0.0417741
6874	3886.04	17	0.0417535
6876	3886.09	17	0.0417959
6878	3886.14	17	0.0417421
6880	3886.19	17	0.0417617
6882	3886.24	17	0.0417213
6884	3886.29	17	0.0417591
6886	3886.34	17	0.0417421
6888	3886.39	17	0.0418258
6890	3886.44	17	0.0418421
6892	3886.49	17	0.0418164
6894	3886.54	17	0.0417786
6896	3886.59	17	0.0418428
6898	3886.64	17	0.0418538
6900	3886.69	17	0.0417861
6902	3886.74	17	0.0418239
6904	3886.79	17	0.0418463
6906	3886.84	17	0.0417822
6908	3886.89	17	0.041803
6910	3886.94	17	0.0417366
6912	3886.99	17	0.0418193
6914	3887.04	17	0.0418369
6916	3887.09	17	0.041778
6918	3887.14	17	0.0417301
6920	3887.19	17	0.0417646
6922	3887.24	17	0.0417574
6924	3887.29	17	0.0417614
6926	3887.34	17	0.0417376
6928	3887.39	17	0.0417431
6930	3887.44	17	0.0417731
6932	3887.49	17	0.0417151
6934	3887.54	17	0.0416998
6936	3887.59	17	0.0417451
6938	3887.64	17	0.0417288
6940	3887.69	17	0.0417311
6942	3887.74	17	0.0417346
6944	3887.79	17	0.0417418
6946	3887.84	17	0.0417353
6948	3887.89	17	0.041778
6950	3887.94	17	0.0417382
6952	3887.99	17	0.041763
6954	3888.04	17	0.0418001
6956	3888.09	17	0.0417294
6958	3888.14	17	0.041845
6960	3888.19	17	0.0417822
6962	3888.24	17	0.0417483
6964	3888.29	17	0.0417802
6966	3888.34	17	0.0418066
6968	3888.39	17	0.0417327
6970	3888.44	17	0.0417659
6972	3888.49	17	0.0419362
6974	3888.54	17	0.0418626
6976	3888.59	17	0.0419375
6978	3888.64	17	0.0419291
6980	3888.69	17	0.0418665
6982	3888.74	17	0.0418815
6984	3888.79	17	0.0418249
6986	3888.84	17	0.0417822
6988	3888.89	17	0.0417711
6990	3888.94	17	0.041736
6992	3888.99	17	0.0417949
6994	3889.04	17	0.0417887
6996	3889.09	17	0.0417975
6998	3889.14	17	0.0418626
7000	3889.19	17	0.0417148
7002	3889.24	17	0.0417744
7004	3889.29	17	0.0417428
7006	3889.34	17	0.0417291
7008	3889.39	17	0.041831
7010	3889.44	17	0.0418053
7012	3889.49	17	0.0417174
7014	3889.54	17	0.0417542
7016	3889.59	17	0.0417881
7018	3889.64	17	0.0417457
7020	3889.69	17	0.041746
7022	3889.74	17	0.0417955
7024	3889.79	17	0.0417236
7026	3889.84	17	0.0417324
7028	3889.89	17	0.0417389
7030	3889.94	17	0.0417594
7032	3889.99	17	0.0417014
7034	3890.04	17	0.0416711
7036	3890.09	17	0.0417014
7038	3890.14	17	0.0417487
7040	3890.19	17	0.0417092
7042	3890.24	17	0.0417206
7044	3890.29	17	0.041761
7046	3890.34	17	0.0417206
7048	3890.39	17	0.0417285
7050	3890.44	17	0.0417031
7052	3890.49	17	0.0417278
7054	3890.54	17	0.0417473
7056	3890.59	17	0.0417314
7058	3890.64	17	0.04172
7060	3890.69	17	0.041718
7062	3890.74	17	0.0417734
7064	3890.79	17	0.0418418
7066	3890.84	17	0.0417548
7068	3890.89	17	0.0417975
7070	3890.94	17	0.0417822
7072	3890.99	17	0.0417571
7074	3891.04	17	0.0416832
7076	3891.09	17	0.0417281
7078	3891.14	17	0.0418382
7080	3891.19	17	0.0418014
7082	3891.24	17	0.0418216
7084	3891.29	17	0.0417405
7086	3891.34	17	0.041792
7088	3891.39	17	0.0417646
7090	3891.44	17	0.0417952
7092	3891.49	17	0.0417721
7094	3891.54	17	0.0417968
7096	3891.59	17	0.0417646
7098	3891.64	17	0.0417506
7100	3891.69	17	0.0417659
7102	3891.74	17	0.0417809
7104	3891.79	17	0.0417555
7106	3891.84	17	0.041748
7108	3891.89	17	0.041791
7110	3891.94	17	0.041735
7112	3891.99	17	0.0417574
7114	3892.04	17	0.0417519
7116	3892.09	17	0.0417548
7118	3892.14	17	0.0417838
7120	3892.19	17	0.0417649
7122	3892.24	17	0.0417268
7124	3892.29	17	0.0417272
7126	3892.34	17	0.0417353
7128	3892.39	17	0.0417346
7130	3892.44	17	0.0417464
7132	3892.49	17	0.0417027
7134	3892.54	17	0.0417988
7136	3892.59	17	0.041747
7138	3892.64	17	0.0417451
7140	3892.69	17	0.0417421
7142	3892.74	17	0.0417438
7144	3892.79	17	0.0417574
7146	3892.84	17	0.041747
7148	3892.89	17	0.0417832
7150	3892.94	17	0.0417281
7152	3892.99	17	0.0417561
7154	3893.04	17	0.0417483
7156	3893.09	17	0.0417063
7158	3893.14	17	0.0417252
7160	3893.19	17	0.0417154
7162	3893.24	17	0.0416806
7164	3893.29	17	0.0417219
7166	3893.34	17	0.0416793
7168	3893.39	17	0.0417092
7170	3893.44	17	0.0416588
7172	3893.49	17	0.0416536
7174	3893.54	17	0.0417053
7176	3893.59	17	0.0417278
7178	3893.64	17	0.0416988
7180	3893.69	17	0.0417154
7182	3893.74	17	0.0417291
7184	3893.79	17	0.0417096
7186	3893.84	17	0.0416705
7188	3893.89	17	0.0416881
7190	3893.94	17	0.04165
7192	3893.99	17	0.0416474
7194	3894.04	17	0.0416627
7196	3894.09	17	0.0416643
7198	3894.14	17	0.0416698
7200	3894.19	17	0.0416379
7202	3894.24	17	0.0416868
7204	3894.29	17	0.0416988
7206	3894.34	17	0.0416272
7208	3894.39	17	0.041665
7210	3894.44	17	0.0416363
7212	3894.49	17	0.0416624
7214	3894.54	17	0.0417008
7216	3894.59	17	0.041636
7218	3894.64	17	0.0416737
7220	3894.69	17	0.0417184
7222	3894.74	17	0.0416633
7224	3894.79	17	0.0416949
7226	3894.84	17	0.0416702
7228	3894.89	17	0.0416216
7230	3894.94	17	0.0417822
7232	3894.99	17	0.0417138
7234	3895.04	17	0.0417083
7236	3895.09	17	0.0417304
7238	3895.14	17	0.041676
7240	3895.19	17	0.0416132
7242	3895.24	17	0.0416904
7244	3895.29	17	0.0416962
7246	3895.34	17	0.041621
7248	3895.39	17	0.0416992
7250	3895.44	17	0.0416796
7252	3895.49	17	0.0416607
7254	3895.54	17	0.0416904
7256	3895.59	17	0.0416282
7258	3895.64	17	0.0416018
7260	3895.69	17	0.0416015
7262	3895.74	17	0.0416487
7264	3895.79	17	0.0415962
7266	3895.84	17	0.0416558
7268	3895.89	17	0.0415848
7270	3895.94	17	0.0416174
7272	3895.99	17	0.0416327
7274	3896.04	17	0.041692
7276	3896.09	17	0.041664
7278	3896.14	17	0.0416242
7280	3896.19	17	0.0416379
7282	3896.24	17	0.0416161
7284	3896.29	17	0.0416262
7286	3896.34	17	0.0416122
7288	3896.39	17	0.0416454
7290	3896.44	17	0.0416829
7292	3896.49	17	0.0416409
7294	3896.54	17	0.0416865
7296	3896.59	17	0.0415871
7298	3896.64	17	0.0416891
7300	3896.69	17	0.0416386
7302	3896.74	17	0.0416741
7304	3896.79	17	0.0417112
7306	3896.84	17	0.0416659
7308	3896.89	17	0.0416773
7310	3896.94	17	0.0417272
7312	3896.99	17	0.0416487
7314	3897.04	17	0.0416386
7316	3897.09	17	0.0416523
7318	3897.14	17	0.0416386
7320	3897.19	17	0.0416568
7322	3897.24	17	0.0415676
7324	3897.29	17	0.0416184
7326	3897.34	17	0.0416151
7328	3897.39	17	0.0416464
7330	3897.44	17	0.0416887
7332	3897.49	17	0.0417285
7334	3897.54	17	0.0417942
7336	3897.59	17	0.0417353
7338	3897.64	17	0.0416913
7340	3897.69	17	0.0416822
7342	3897.74	17	0.0416102
7344	3897.79	17	0.0416174
7346	3897.84	17	0.0415979
7348	3897.89	17	0.0415676
7350	3897.94	17	0.0415692
7352	3897.99	17	0.0415572
7354	3898.04	17	0.0415764
7356	3898.09	17	0.0415624
7358	3898.14	17	0.0415979
7360	3898.19	17	0.0415461
7362	3898.24	17	0.0415031
7364	3898.29	17	0.0414904
7366	3898.34	17	0.0415419
7368	3898.39	17	0.0416568
7370	3898.44	17	0.0415888
7372	3898.49	17	0.0416545
7374	3898.54	17	0.0416252
7376	3898.59	17	0.0416617
7378	3898.64	17	0.0416588
7380	3898.69	17	0.0416259
7382	3898.74	17	0.0416327
7384	3898.79	17	0.0416021
7386	3898.84	17	0.0416448
7388	3898.89	17	0.0416536
7390	3898.94	17	0.0416138
7392	3898.99	17	0.0416031
7394	3899.04	17	0.0416028
7396	3899.09	17	0.0416265
7398	3899.14	17	0.0415998
7400	3899.19	17	0.0415731
7402	3899.24	17	0.0415897
7404	3899.29	17	0.0415946
7406	3899.34	17	0.0415839
7408	3899.39	17	0.0415878
7410	3899.44	17	0.0415321
7412	3899.49	17	0.0415855
7414	3899.54	17	0.041537
7416	3899.59	17	0.041565
7418	3899.64	17	0.0415523
7420	3899.69	17	0.0415637
7422	3899.74	17	0.0415295
7424	3899.79	17	0.0414959
7426	3899.84	17	0.0415738
7428	3899.89	17	0.0415949
7430	3899.94	17	0.0415513
7432	3899.99	17	0.0415774
7434	3900.04	17	0.041549
7436	3900.09	17	0.0415357
7438	3900.14	17	0.0415383
7440	3900.19	17	0.0415353
7442	3900.24	17	0.041578
7444	3900.29	17	0.0414865
7446	3900.34	17	0.0415386
7448	3900.39	17	0.0415083
7450	3900.44	17	0.0415223
7452	3900.49	17	0.0414771
7454	3900.54	17	0.0415373
7456	3900.59	17	0.0414771
7458	3900.64	17	0.0415012
7460	3900.69	17	0.0415145
7462	3900.74	17	0.0415152
7464	3900.79	17	0.0415415
7466	3900.84	17	0.0415666
7468	3900.89	17	0.0415272
7470	3900.94	17	0.0415523
7472	3900.99	17	0.0415252
7474	3901.04	17	0.0415438
7476	3901.09	17	0.0414562
7478	3901.14	17	0.0414754
7480	3901.19	17	0.0415197
7482	3901.24	17	0.0415399
7484	3901.29	17	0.0415067
7486	3901.34	17	0.0415041
7488	3901.39	17	0.0415148
7490	3901.44	17	0.04148
7492	3901.49	17	0.0415067
7494	3901.54	17	0.041507
7496	3901.59	17	0.0415487
7498	3901.64	17	0.0415471
7500	3901.69	17	0.0414735
7502	3901.74	17	0.0415217
7504	3901.79	17	0.0415275
7506	3901.84	17	0.0414875
7508	3901.89	17	0.0414858
7510	3901.94	17	0.0414891
7512	3901.99	17	0.0415464
7514	3902.04	17	0.041508
7516	3902.09	17	0.041535
7518	3902.14	17	0.041521
7520	3902.19	17	0.041549
7522	3902.24	17	0.041479
7524	3902.29	17	0.0414806
7526	3902.34	17	0.0414806
7528	3902.39	17	0.0414839
7530	3902.44	17	0.0414738
7532	3902.49	17	0.0414494
7534	3902.54	17	0.041439
7536	3902.59	17	0.0414806
7538	3902.64	17	0.0414637
7540	3902.69	17	0.0415259
7542	3902.74	17	0.0414784
7544	3902.79	17	0.0414979
7546	3902.84	17	0.0414403
7548	3902.89	17	0.0414347
7550	3902.94	17	0.0414858
7552	3902.99	17	0.0414735
7554	3903.04	17	0.0414484
7556	3903.09	17	0.0414484
7558	3903.14	17	0.0414448
7560	3903.19	17	0.041479
7562	3903.24	17	0.0415038
7564	3903.29	17	0.0415034
7566	3903.34	17	0.0415604
7568	3903.39	17	0.0414969
7570	3903.44	17	0.0414549
7572	3903.49	17	0.0414787
7574	3903.54	17	0.0414552
7576	3903.59	17	0.0414712
7578	3903.64	17	0.0414803
7580	3903.69	17	0.0414819
7582	3903.74	17	0.0414832
7584	3903.79	17	0.0414503
7586	3903.84	17	0.0414875
7588	3903.89	17	0.0414432
7590	3903.94	17	0.0414448
7592	3903.99	17	0.0414487
7594	3904.04	17	0.0414503
7596	3904.09	17	0.0414262
7598	3904.14	17	0.0414523
7600	3904.19	17	0.0414533
7602	3904.24	17	0.0414989
7604	3904.29	17	0.0414591
7606	3904.34	17	0.0414526
7608	3904.39	17	0.0414517
7610	3904.44	17	0.0413849
7612	3904.49	17	0.0414676
7614	3904.54	17	0.0414448
7616	3904.59	17	0.0414543
7618	3904.64	17	0.0414526
7620	3904.69	17	0.0414731
7622	3904.74	17	0.0415051
7624	3904.79	17	0.0414383
7626	3904.84	17	0.0414129
7628	3904.89	17	0.0414038
7630	3904.94	17	0.0414109
7632	3904.99	17	0.0414445
7634	3905.04	17	0.0415077
7636	3905.09	17	0.0414012
7638	3905.14	17	0.0414276
7640	3905.19	17	0.0414591
7642	3905.24	17	0.0414438
7644	3905.29	17	0.0414624
7646	3905.34	17	0.041452
7648	3905.39	17	0.0414995
7650	3905.44	17	0.0415213
7652	3905.49	17	0.0414409
7654	3905.54	17	0.0414419
7656	3905.59	17	0.0414403
7658	3905.64	17	0.0413592
7660	3905.69	17	0.0413842
7662	3905.74	17	0.0414517
7664	3905.79	17	0.0413654
7666	3905.84	17	0.0413588
7668	3905.89	17	0.0413683
7670	3905.94	17	0.041339
7672	3905.99	17	0.0413637
7674	3906.04	17	0.041379
7676	3906.09	17	0.0413738
7678	3906.14	17	0.0413481
7680	3906.19	17	0.0413624
7682	3906.24	17	0.0413585
7684	3906.29	17	0.0414194
7686	3906.34	17	0.0413927
7688	3906.39	17	0.0414363
7690	3906.44	17	0.0414074
7692	3906.49	17	0.0413553
7694	3906.54	17	0.041395
7696	3906.59	17	0.0413611
7698	3906.64	17	0.0413771
7700	3906.69	17	0.0413823
7702	3906.74	17	0.04138
7704	3906.79	17	0.041364
7706	3906.84	17	0.0413647
7708	3906.89	17	0.0413898
7710	3906.94	17	0.0413689
7712	3906.99	17	0.0413084
7714	3907.04	17	0.0413745
7716	3907.09	17	0.0413751
7718	3907.14	17	0.0413839
7720	3907.19	17	0.0413478
7722	3907.24	17	0.0413699
7724	3907.29	17	0.041354
7726	3907.34	17	0.0413673
7728	3907.39	17	0.0413227
7730	3907.44	17	0.0413914
7732	3907.49	17	0.0414285
7734	3907.54	17	0.0414051
7736	3907.59	17	0.0413986
7738	3907.64	17	0.0414022
7740	3907.69	17	0.0413865
7742	3907.74	17	0.0413569
7744	3907.79	17	0.0412976
7746	3907.84	17	0.04138
7748	3907.89	17	0.0413256
7750	3907.94	17	0.04131
7752	3907.99	17	0.0413487
7754	3908.04	17	0.0413299
7756	3908.09	17	0.0412813
7758	3908.14	17	0.0413833
7760	3908.19	17	0.0413351
7762	3908.24	17	0.0412849
7764	3908.29	17	0.0413566
7766	3908.34	17	0.0413367
7768	3908.39	17	0.0414184
7770	3908.44	17	0.0413745
7772	3908.49	17	0.0413895
7774	3908.54	17	0.0413846
7776	3908.59	17	0.0414155
7778	3908.64	17	0.0414002
7780	3908.69	17	0.0414022
7782	3908.74	17	0.0413533
7784	3908.79	17	0.0413816
7786	3908.84	17	0.0413159
7788	3908.89	17	0.0413474
7790	3908.94	17	0.0413214
7792	3908.99	17	0.0413657
7794	3909.04	17	0.041366
7796	3909.09	17	0.0413702
7798	3909.14	17	0.0413693
7800	3909.19	17	0.0413344
7802	3909.24	17	0.0413393
7804	3909.29	17	0.0413211
7806	3909.34	17	0.0413351
7808	3909.39	17	0.0413129
7810	3909.44	17	0.0413396
7812	3909.49	17	0.0413618
7814	3909.54	17	0.0413504
7816	3909.59	17	0.0413435
7818	3909.64	17	0.0413315
7820	3909.69	17	0.0413487
7822	3909.74	17	0.0413768
7824	3909.79	17	0.0413045
7826	3909.84	17	0.0412891
7828	3909.89	17	0.0412696
7830	3909.94	17	0.0413357
7832	3909.99	17	0.0413061
7834	3910.04	17	0.0413364
7836	3910.09	17	0.0413409
7838	3910.14	17	0.0413071
7840	3910.19	17	0.0413308
7842	3910.24	17	0.041294
7844	3910.29	17	0.04131
7846	3910.34	17	0.04131
7848	3910.39	17	0.0413207
7850	3910.44	17	0.0412462
7852	3910.49	17	0.0413266
7854	3910.54	17	0.0412745
7856	3910.59	17	0.0412032
7858	3910.64	17	0.0411849
7860	3910.69	17	0.0411146
7862	3910.74	17	0.0411332
7864	3910.79	17	0.0412523
7866	3910.84	17	0.0411778
7868	3910.89	17	0.0412204
7870	3910.94	17	0.0412732
7872	3910.99	17	0.0413145
7874	3911.04	17	0.0412436
7876	3911.09	17	0.0412514
7878	3911.14	17	0.0411592
7880	3911.19	17	0.0412722
7882	3911.24	17	0.0412442
7884	3911.29	17	0.0411794
7886	3911.34	17	0.0411901
7888	3911.39	17	0.0411833
7890	3911.44	17	0.0412664
7892	3911.49	17	0.0412149
7894	3911.54	17	0.0412344
7896	3911.59	17	0.0412931
7898	3911.64	17	0.0411335
7900	3911.69	17	0.0410374
7902	3911.74	17	0.0411426
7904	3911.79	17	0.0411358
7906	3911.84	17	0.0410599
7908	3911.89	17	0.0411413
7910	3911.94	17	0.0411788
7912	3911.99	17	0.0411348
7914	3912.04	17	0.0412002
7916	3912.09	17	0.041111
7918	3912.14	17	0.0410957
7920	3912.19	17	0.0411908
7922	3912.24	17	0.0411602
7924	3912.29	17	0.041239
7926	3912.34	17	0.0412162
7928	3912.39	17	0.0411628
7930	3912.44	17	0.0411996
7932	3912.49	17	0.0412413
7934	3912.54	17	0.0413087
7936	3912.59	17	0.0412849
7938	3912.64	17	0.0412292
7940	3912.69	17	0.0412344
7942	3912.74	17	0.0412279
7944	3912.79	17	0.0412374
7946	3912.84	17	0.041225
7948	3912.89	17	0.041226
7950	3912.94	17	0.0412758
7952	3912.99	17	0.0412566
7954	3913.04	17	0.0412833
7956	3913.09	17	0.0411924
7958	3913.14	17	0.0412784
7960	3913.19	17	0.041239
7962	3913.24	17	0.0412019
7964	3913.29	17	0.0411335
7966	3913.34	17	0.0411442
7968	3913.39	17	0.0410703
7970	3913.44	17	0.0411126
7972	3913.49	17	0.0411231
7974	3913.54	17	0.0411498
7976	3913.59	17	0.0410521
7978	3913.64	17	0.0411162
7980	3913.69	17	0.0411016
7982	3913.74	17	0.0411087
7984	3913.79	17	0.0411553
7986	3913.84	17	0.0411498
7988	3913.89	17	0.041085
7990	3913.94	17	0.0411025
7992	3913.99	17	0.0410938
7994	3914.04	17	0.041084
7996	3914.09	17	0.041071
7998	3914.14	17	0.0411182
8000	3914.19	17	0.0410648
8002	3914.24	17	0.0411364
8004	3914.29	17	0.041112
8006	3914.34	17	0.0411384
8008	3914.39	17	0.0411097
8010	3914.44	17	0.0411289
8012	3914.49	17	0.041124
8014	3914.54	17	0.0411436
8016	3914.59	17	0.0411599
8018	3914.64	17	0.0411706
8020	3914.69	17	0.041097
8022	3914.74	17	0.0410944
8024	3914.79	17	0.0411449
8026	3914.84	17	0.0411413
8028	3914.89	17	0.0411797
8030	3914.94	17	0.0412159
8032	3914.99	17	0.0411967
8034	3915.04	17	0.0412462
8036	3915.09	17	0.0411801
8038	3915.14	17	0.041183
8040	3915.19	17	0.041183
8042	3915.24	17	0.0411309
8044	3915.29	17	0.0411801
8046	3915.34	17	0.0411634
8048	3915.39	17	0.0411608
8050	3915.44	17	0.0411452
8052	3915.49	17	0.0411719
8054	3915.54	17	0.041195
8056	3915.59	17	0.0412504
8058	3915.64	17	0.0411683
8060	3915.69	17	0.0412387
8062	3915.74	17	0.0411446
8064	3915.79	17	0.0411631
8066	3915.84	17	0.0411358
8068	3915.89	17	0.0411498
8070	3915.94	17	0.0412133
8072	3915.99	17	0.0411888
8074	3916.04	17	0.0411208
8076	3916.09	17	0.041195
8078	3916.14	17	0.0411703
8080	3916.19	17	0.0411967
8082	3916.24	17	0.0411569
8084	3916.29	17	0.0412419
8086	3916.34	17	0.0411752
8088	3916.39	17	0.0411973
8090	3916.44	17	0.0412309
8092	3916.49	17	0.0412875
8094	3916.54	17	0.0412947
8096	3916.59	17	0.0412032
8098	3916.64	17	0.0412957
8100	3916.69	17	0.0412572
8102	3916.74	17	0.0412374
8104	3916.79	17	0.0412299
8106	3916.84	17	0.0412396
8108	3916.89	17	0.0412735
8110	3916.94	17	0.0412781
8112	3916.99	17	0.0412357
8114	3917.04	17	0.0412322
8116	3917.09	17	0.0412839
8118	3917.14	17	0.0412712
8120	3917.19	17	0.0412159
8122	3917.24	17	0.0412126
8124	3917.29	17	0.0412165
8126	3917.34	17	0.0412436
8128	3917.39	17	0.0412028
8130	3917.44	17	0.0411742
8132	3917.49	17	0.0411976
8134	3917.54	17	0.041195
8136	3917.59	17	0.0412393
8138	3917.64	17	0.0412142
8140	3917.69	17	0.0411973
8142	3917.74	17	0.0411846
8144	3917.79	17	0.0411358
8146	3917.84	17	0.0411667
8148	3917.89	17	0.0411625
8150	3917.94	17	0.041211
8152	3917.99	17	0.041156
8154	3918.04	17	0.0411367
8156	3918.09	17	0.0411862
8158	3918.14	17	0.0412165
8160	3918.19	17	0.0411814
8162	3918.24	17	0.0412335
8164	3918.29	17	0.0411703
8166	3918.34	17	0.0411387
8168	3918.39	17	0.0411468
8170	3918.44	17	0.0411618
8172	3918.49	17	0.0411888
8174	3918.54	17	0.0412354
8176	3918.59	17	0.0411947
8178	3918.64	17	0.0411644
8180	3918.69	17	0.0411143
8182	3918.74	17	0.0410895
8184	3918.79	17	0.0411478
8186	3918.84	17	0.0411022
8188	3918.89	17	0.0411058
8190	3918.94	17	0.0410635
8192	3918.99	17	0.041153
8194	3919.04	17	0.041168
8196	3919.09	17	0.041197
8198	3919.14	17	0.0411374
8200	3919.19	17	0.0412419
8202	3919.24	17	0.0411755
8204	3919.29	17	0.0411592
8206	3919.34	17	0.0411286
8208	3919.39	17	0.0411547
8210	3919.44	17	0.0411621
8212	3919.49	17	0.0412256
8214	3919.54	17	0.0411843
8216	3919.59	17	0.0411846
8218	3919.64	17	0.041138
8220	3919.69	17	0.041155
8222	3919.74	17	0.0411449
8224	3919.79	17	0.0411247
8226	3919.84	17	0.0411348
8228	3919.89	17	0.0411514
8230	3919.94	17	0.0411029
8232	3919.99	17	0.041127
8234	3920.04	17	0.0411152
8236	3920.09	17	0.0411882
8238	3920.14	17	0.0411651
8240	3920.19	17	0.0411755
8242	3920.24	17	0.0411739
8244	3920.29	17	0.041241
8246	3920.34	17	0.0411387
8248	3920.39	17	0.0411527
8250	3920.44	17	0.0411472
8252	3920.49	17	0.0411651
8254	3920.54	17	0.0411892
8256	3920.59	17	0.0411827
8258	3920.64	17	0.0411253
8260	3920.69	17	0.0411576
8262	3920.74	17	0.0411485
8264	3920.79	17	0.041184
8266	3920.84	17	0.0411485
8268	3920.89	17	0.0410977
8270	3920.94	17	0.0411341
8272	3920.99	17	0.041084
8274	3921.04	17	0.0411068
8276	3921.09	17	0.0411029
8278	3921.14	17	0.0411641
8280	3921.19	17	0.0411618
8282	3921.24	17	0.0411937
8284	3921.29	17	0.0411967
8286	3921.34	17	0.0411657
8288	3921.39	17	0.0411029
8290	3921.44	17	0.0411211
8292	3921.49	17	0.0411605
8294	3921.54	17	0.0411791
8296	3921.59	17	0.041111
8298	3921.64	17	0.0411211
8300	3921.69	17	0.0411029
8302	3921.74	17	0.0411045
8304	3921.79	17	0.0410869
8306	3921.84	17	0.0411048
8308	3921.89	17	0.0411332
8310	3921.94	17	0.0410758
8312	3921.99	17	0.041099
8314	3922.04	17	0.0411335
8316	3922.09	17	0.0411426
8318	3922.14	17	0.0410837
8320	3922.19	17	0.0410762
8322	3922.24	17	0.0411169
8324	3922.29	17	0.0410771
8326	3922.34	17	0.0410947
8328	3922.39	17	0.0410742
8330	3922.44	17	0.041057
8332	3922.49	17	0.04107
8334	3922.54	17	0.0411038
8336	3922.59	17	0.0410612
8338	3922.64	17	0.0410631
8340	3922.69	17	0.0410745
8342	3922.74	17	0.0410504
8344	3922.79	17	0.0410752
8346	3922.84	17	0.0411345
8348	3922.89	17	0.041154
8350	3922.94	17	0.0411573
8352	3922.99	17	0.041181
8354	3923.04	17	0.0412595
8356	3923.09	17	0.0412507
8358	3923.14	17	0.0412051
8360	3923.19	17	0.04124
8362	3923.24	17	0.0412618
8364	3923.29	17	0.0412338
8366	3923.34	17	0.0411719
8368	3923.39	17	0.0412048
8370	3923.44	17	0.0412256
8372	3923.49	17	0.0412146
8374	3923.54	17	0.0411801
8376	3923.59	17	0.0411472
8378	3923.64	17	0.0411817
8380	3923.69	17	0.0411133
8382	3923.74	17	0.041154
8384	3923.79	17	0.0411058
8386	3923.84	17	0.0411449
8388	3923.89	17	0.0411996
8390	3923.94	17	0.0411179
8392	3923.99	17	0.0411237
8394	3924.04	17	0.041096
8396	3924.09	17	0.0411921
8398	3924.14	17	0.0410902
8400	3924.19	17	0.0411446
8402	3924.24	17	0.0411543
8404	3924.29	17	0.0411553
8406	3924.34	17	0.0411022
8408	3924.39	17	0.0411739
8410	3924.44	17	0.0411644
8412	3924.49	17	0.0411761
8414	3924.54	17	0.0411472
8416	3924.59	17	0.0411957
8418	3924.64	17	0.0411406
8420	3924.69	17	0.0411869
8422	3924.74	17	0.0411761
8424	3924.79	17	0.0412107
8426	3924.84	17	0.0411488
8428	3924.89	17	0.0411439
8430	3924.94	17	0.0410804
8432	3924.99	17	0.0410889
8434	3925.04	17	0.0410736
8436	3925.09	17	0.0411429
8438	3925.14	17	0.0411384
8440	3925.19	17	0.041113
8442	3925.24	17	0.0410866
8444	3925.29	17	0.0411374
8446	3925.34	17	0.0411335
8448	3925.39	17	0.0411384
8450	3925.44	17	0.0411224
8452	3925.49	17	0.0411817
8454	3925.54	17	0.0411524
8456	3925.59	17	0.0411003
8458	3925.64	17	0.0411654
8460	3925.69	17	0.0410863
8462	3925.74	17	0.0411332
8464	3925.79	17	0.0410947
8466	3925.84	17	0.0411078
8468	3925.89	17	0.0410726
8470	3925.94	17	0.0410768
8472	3925.99	17	0.0410684
8474	3926.04	17	0.0411566
8476	3926.09	17	0.041113
8478	3926.14	17	0.0411719
8480	3926.19	17	0.0411312
8482	3926.24	17	0.0411293
8484	3926.29	17	0.0411452
8486	3926.34	17	0.041139
8488	3926.39	17	0.0411315
8490	3926.44	17	0.0411853
8492	3926.49	17	0.0411276
8494	3926.54	17	0.0411078
8496	3926.59	17	0.0411605
8498	3926.64	17	0.0411752
[truncated: 15,150 more rows]

## Sheet: Mouse 1_470
FrameCounter	Timestamp	Flags	Region0G
4503	3826.77	18	0.0316285
4505	3826.82	18	0.0316497
4507	3826.87	18	0.0316376
4509	3826.92	18	0.0316419
4511	3826.97	18	0.0316448
4513	3827.02	18	0.0316025
4515	3827.07	18	0.0316132
4517	3827.12	18	0.031623
4519	3827.17	18	0.031636
4521	3827.22	18	0.0316432
4523	3827.27	18	0.0316448
4525	3827.32	18	0.0317129
4527	3827.37	18	0.0317868
4529	3827.42	18	0.0317233
4531	3827.47	18	0.0317477
4533	3827.52	18	0.0317487
4535	3827.57	18	0.0316748
4537	3827.62	18	0.0316969
4539	3827.67	18	0.0317334
4541	3827.72	18	0.0316582
4543	3827.77	18	0.0316526
4545	3827.82	18	0.0316676
4547	3827.87	18	0.0316643
4549	3827.92	18	0.0316236
4551	3827.97	18	0.0315702
4553	3828.02	18	0.0316901
4555	3828.07	18	0.0316008
4557	3828.12	18	0.0316103
4559	3828.17	18	0.0315956
4561	3828.22	18	0.0316031
4563	3828.27	18	0.0316181
4565	3828.32	18	0.0316327
4567	3828.37	18	0.0316096
4569	3828.42	18	0.0316227
4571	3828.47	18	0.0316132
4573	3828.52	18	0.0316161
4575	3828.57	18	0.031581
4577	3828.62	18	0.0315862
4579	3828.67	18	0.0316334
4581	3828.72	18	0.0316292
4583	3828.77	18	0.0316116
4585	3828.82	18	0.0315917
4587	3828.87	18	0.0316415
4589	3828.92	18	0.0316171
4591	3828.97	18	0.0315393
4593	3829.02	18	0.0315803
4595	3829.07	18	0.0315862
4597	3829.12	18	0.0315914
4599	3829.17	18	0.0315764
4601	3829.22	18	0.0315816
4603	3829.27	18	0.0316217
4605	3829.32	18	0.0315907
4607	3829.37	18	0.0316601
4609	3829.42	18	0.0316288
4611	3829.47	18	0.0316682
4613	3829.52	18	0.0316119
4615	3829.57	18	0.0315914
4617	3829.62	18	0.0316207
4619	3829.67	18	0.0316546
4621	3829.72	18	0.0316354
4623	3829.77	18	0.0316057
4625	3829.82	18	0.0316298
4627	3829.87	18	0.0316129
4629	3829.92	18	0.0316643
4631	3829.97	18	0.0316774
4633	3830.02	18	0.0316389
4635	3830.07	18	0.0316435
4637	3830.12	18	0.0316178
4639	3830.17	18	0.0316692
4641	3830.22	18	0.0316275
4643	3830.27	18	0.0315627
4645	3830.32	18	0.0315907
4647	3830.37	18	0.0316005
4649	3830.42	18	0.031635
4651	3830.47	18	0.0315924
4653	3830.52	18	0.0315836
4655	3830.57	18	0.0315676
4657	3830.62	18	0.0315549
4659	3830.67	18	0.0316002
4661	3830.72	18	0.0315787
4663	3830.77	18	0.0316031
4665	3830.82	18	0.0315315
4667	3830.87	18	0.0315846
4669	3830.92	18	0.0316249
4671	3830.97	18	0.0316923
4673	3831.02	18	0.0317679
4675	3831.07	18	0.0317392
4677	3831.12	18	0.0317581
4679	3831.17	18	0.0317513
4681	3831.22	18	0.0317575
4683	3831.27	18	0.0317572
4685	3831.32	18	0.0316897
4687	3831.37	18	0.0316796
4689	3831.42	18	0.031664
4691	3831.47	18	0.0316712
4693	3831.52	18	0.031664
4695	3831.57	18	0.0316575
4697	3831.62	18	0.0316774
4699	3831.67	18	0.0316077
4701	3831.72	18	0.0316194
4703	3831.77	18	0.0316627
4705	3831.82	18	0.0316582
4707	3831.87	18	0.0316451
4709	3831.92	18	0.0316852
4711	3831.97	18	0.0315979
4713	3832.02	18	0.0315999
4715	3832.07	18	0.0316142
4717	3832.12	18	0.0315933
4719	3832.17	18	0.0315819
4721	3832.22	18	0.0315754
4723	3832.27	18	0.0316187
4725	3832.32	18	0.0315849
4727	3832.37	18	0.0316197
4729	3832.42	18	0.0316161
4731	3832.47	18	0.0316305
4733	3832.52	18	0.0316083
4735	3832.57	18	0.0316256
4737	3832.62	18	0.0315565
4739	3832.67	18	0.0315523
4741	3832.72	18	0.031537
4743	3832.77	18	0.0315777
4745	3832.82	18	0.0315305
4747	3832.87	18	0.0315438
4749	3832.92	18	0.0316122
4751	3832.97	18	0.0315696
4753	3833.02	18	0.0315269
4755	3833.07	18	0.031539
4757	3833.12	18	0.0315132
4759	3833.17	18	0.0315442
4761	3833.22	18	0.03158
4763	3833.27	18	0.0315634
4765	3833.32	18	0.0315259
4767	3833.37	18	0.0315575
4769	3833.42	18	0.0315507
4771	3833.47	18	0.0315679
4773	3833.52	18	0.0315263
4775	3833.57	18	0.0315969
4777	3833.62	18	0.0315422
4779	3833.67	18	0.0315276
4781	3833.72	18	0.0315067
4783	3833.77	18	0.0314934
4785	3833.82	18	0.0315679
4787	3833.87	18	0.0315549
4789	3833.92	18	0.0315425
4791	3833.97	18	0.0315279
4793	3834.02	18	0.0314956
4795	3834.07	18	0.0314846
4797	3834.12	18	0.0315546
4799	3834.17	18	0.0315298
4801	3834.22	18	0.0315601
4803	3834.27	18	0.0315383
4805	3834.32	18	0.0315119
4807	3834.37	18	0.0315311
4809	3834.42	18	0.03148
4811	3834.47	18	0.0315035
4813	3834.52	18	0.0314693
4815	3834.57	18	0.0315448
4817	3834.62	18	0.0315481
4819	3834.67	18	0.0315298
4821	3834.72	18	0.0315676
4823	3834.77	18	0.0315891
4825	3834.82	18	0.0315565
4827	3834.87	18	0.0315784
4829	3834.92	18	0.031565
4831	3834.97	18	0.0315598
4833	3835.02	18	0.0315129
4835	3835.07	18	0.0314911
4837	3835.12	18	0.0316275
4839	3835.17	18	0.0315181
4841	3835.22	18	0.0315416
4843	3835.27	18	0.031539
4845	3835.32	18	0.0314878
4847	3835.37	18	0.0315051
4849	3835.42	18	0.0315859
4851	3835.47	18	0.0315872
4853	3835.52	18	0.0315764
4855	3835.57	18	0.0314992
4857	3835.62	18	0.0315364
4859	3835.67	18	0.0315061
4861	3835.72	18	0.0315256
4863	3835.77	18	0.0314836
4865	3835.82	18	0.0314924
4867	3835.87	18	0.031511
4869	3835.92	18	0.031521
4871	3835.97	18	0.0314514
4873	3836.02	18	0.0314468
4875	3836.07	18	0.0314631
4877	3836.12	18	0.0314816
4879	3836.17	18	0.0314575
4881	3836.22	18	0.0315054
4883	3836.27	18	0.0314302
4885	3836.32	18	0.0314419
4887	3836.37	18	0.0314663
4889	3836.42	18	0.0314445
4891	3836.47	18	0.0314445
4893	3836.52	18	0.031481
4895	3836.57	18	0.031453
4897	3836.62	18	0.0314302
4899	3836.67	18	0.0314504
4901	3836.72	18	0.0314732
4903	3836.77	18	0.0314917
4905	3836.82	18	0.0314755
4907	3836.87	18	0.0314745
4909	3836.92	18	0.0314924
4911	3836.97	18	0.0314569
4913	3837.02	18	0.0314699
4915	3837.07	18	0.0314569
4917	3837.12	18	0.0314709
4919	3837.17	18	0.0314976
4921	3837.22	18	0.03144
4923	3837.27	18	0.0315184
4925	3837.32	18	0.0314504
4927	3837.37	18	0.0314862
4929	3837.42	18	0.031467
4931	3837.47	18	0.0314667
4933	3837.52	18	0.0314748
4935	3837.57	18	0.0314569
4937	3837.62	18	0.0314829
4939	3837.67	18	0.031482
4941	3837.72	18	0.0314207
4943	3837.77	18	0.0314364
4945	3837.82	18	0.031468
4947	3837.87	18	0.0314755
4949	3837.92	18	0.0314673
4951	3837.97	18	0.0314452
4953	3838.02	18	0.031468
4955	3838.07	18	0.0314702
4957	3838.12	18	0.0314087
4959	3838.17	18	0.0314543
4961	3838.22	18	0.0314497
4963	3838.27	18	0.0313934
4965	3838.32	18	0.0314325
4967	3838.37	18	0.0314025
4969	3838.42	18	0.031398
4971	3838.47	18	0.0313807
4973	3838.52	18	0.0314299
4975	3838.57	18	0.0315204
4977	3838.62	18	0.031466
4979	3838.67	18	0.0314045
4981	3838.72	18	0.0314198
4983	3838.77	18	0.0314123
4985	3838.82	18	0.0314481
4987	3838.87	18	0.0313761
4989	3838.92	18	0.0314367
4991	3838.97	18	0.031411
4993	3839.02	18	0.0314191
4995	3839.07	18	0.0314234
4997	3839.12	18	0.0314227
4999	3839.17	18	0.0314452
5001	3839.22	18	0.0314116
5003	3839.27	18	0.031394
5005	3839.32	18	0.0314243
5007	3839.37	18	0.0314611
5009	3839.42	18	0.0314575
5011	3839.47	18	0.0313813
5013	3839.52	18	0.0314751
5015	3839.57	18	0.0314471
5017	3839.62	18	0.0314536
5019	3839.67	18	0.0314237
5021	3839.72	18	0.0314637
5023	3839.77	18	0.0314514
5025	3839.82	18	0.0314321
5027	3839.87	18	0.0314475
5029	3839.92	18	0.031467
5031	3839.97	18	0.0314631
5033	3840.02	18	0.0314357
5035	3840.07	18	0.0314273
5037	3840.12	18	0.0314475
5039	3840.17	18	0.0314501
5041	3840.22	18	0.0314706
5043	3840.27	18	0.0314188
5045	3840.32	18	0.0314061
5047	3840.37	18	0.0314374
5049	3840.42	18	0.031467
5051	3840.47	18	0.0314706
5053	3840.52	18	0.0314308
5055	3840.57	18	0.0314279
5057	3840.62	18	0.031453
5059	3840.67	18	0.0314582
5061	3840.72	18	0.0314045
5063	3840.77	18	0.0314426
5065	3840.82	18	0.0314416
5067	3840.87	18	0.0314448
5069	3840.92	18	0.0313849
5071	3840.97	18	0.0314475
5073	3841.02	18	0.0314279
5075	3841.07	18	0.0314152
5077	3841.12	18	0.0314364
5079	3841.17	18	0.0314338
5081	3841.22	18	0.0313908
5083	3841.27	18	0.0314019
5085	3841.32	18	0.0314194
5087	3841.37	18	0.0313839
5089	3841.42	18	0.0314253
5091	3841.47	18	0.0314054
5093	3841.52	18	0.0314422
5095	3841.57	18	0.0314504
5097	3841.62	18	0.0314253
5099	3841.67	18	0.0314771
5101	3841.72	18	0.031467
5103	3841.77	18	0.0314331
5105	3841.82	18	0.0314426
5107	3841.87	18	0.031479
5109	3841.92	18	0.0313631
5111	3841.97	18	0.0314347
5113	3842.02	18	0.0314357
5115	3842.07	18	0.0314247
5117	3842.12	18	0.0314185
5119	3842.17	18	0.031412
5121	3842.22	18	0.0314006
5123	3842.27	18	0.0314569
5125	3842.32	18	0.0314136
5127	3842.37	18	0.0314064
5129	3842.42	18	0.0313423
5131	3842.47	18	0.0313986
5133	3842.52	18	0.0314022
5135	3842.57	18	0.0314009
5137	3842.62	18	0.0313927
5139	3842.67	18	0.0313921
5141	3842.72	18	0.031323
5143	3842.77	18	0.0313647
5145	3842.82	18	0.0313325
5147	3842.87	18	0.0313813
5149	3842.92	18	0.0313423
5151	3842.97	18	0.0313436
5153	3843.02	18	0.0314123
5155	3843.07	18	0.031425
5157	3843.12	18	0.0314152
5159	3843.17	18	0.0313895
5161	3843.22	18	0.0314198
5163	3843.27	18	0.0314575
5165	3843.32	18	0.0314702
5167	3843.37	18	0.031437
5169	3843.42	18	0.0314468
5171	3843.47	18	0.0314481
5173	3843.52	18	0.031423
5175	3843.57	18	0.031408
5177	3843.62	18	0.0314178
5179	3843.67	18	0.0314211
5181	3843.72	18	0.0313725
5183	3843.77	18	0.031396
5185	3843.82	18	0.0314396
5187	3843.87	18	0.0314507
5189	3843.92	18	0.0314159
5191	3843.97	18	0.0314207
5193	3844.02	18	0.0313947
5195	3844.07	18	0.0314628
5197	3844.12	18	0.0314654
5199	3844.17	18	0.0314266
5201	3844.22	18	0.0314797
5203	3844.27	18	0.0314478
5205	3844.32	18	0.0314768
5207	3844.37	18	0.0314856
5209	3844.42	18	0.031466
5211	3844.47	18	0.031496
5213	3844.52	18	0.0314764
5215	3844.57	18	0.0314755
5217	3844.62	18	0.0314556
5219	3844.67	18	0.0315041
5221	3844.72	18	0.0315067
5223	3844.77	18	0.031467
5225	3844.82	18	0.0314956
5227	3844.87	18	0.0314598
5229	3844.92	18	0.0315145
5231	3844.97	18	0.0315152
5233	3845.02	18	0.031466
5235	3845.07	18	0.0314517
5237	3845.12	18	0.0315035
5239	3845.17	18	0.0314409
5241	3845.22	18	0.0314572
5243	3845.27	18	0.0313947
5245	3845.32	18	0.0313823
5247	3845.37	18	0.0314022
5249	3845.42	18	0.0313953
5251	3845.47	18	0.0313833
5253	3845.52	18	0.0313999
5255	3845.57	18	0.0314624
5257	3845.62	18	0.0314491
5259	3845.67	18	0.0314673
5261	3845.72	18	0.0313989
5263	3845.77	18	0.0314305
5265	3845.82	18	0.0313879
5267	3845.87	18	0.0313895
5269	3845.92	18	0.0313918
5271	3845.97	18	0.0314084
5273	3846.02	18	0.0314077
5275	3846.07	18	0.031408
5277	3846.12	18	0.0313885
5279	3846.17	18	0.0313608
5281	3846.22	18	0.0313621
5283	3846.27	18	0.0314126
5285	3846.32	18	0.0313791
5287	3846.37	18	0.0313537
5289	3846.42	18	0.0313699
5291	3846.47	18	0.0313696
5293	3846.52	18	0.0313341
5295	3846.57	18	0.0313439
5297	3846.62	18	0.0313983
5299	3846.67	18	0.0313791
5301	3846.72	18	0.0313517
5303	3846.77	18	0.0313276
5305	3846.82	18	0.0313498
5307	3846.87	18	0.0313491
5309	3846.92	18	0.0313725
5311	3846.97	18	0.0313289
5313	3847.02	18	0.0313664
5315	3847.07	18	0.0313585
5317	3847.12	18	0.0313263
5319	3847.17	18	0.0313683
5321	3847.22	18	0.031324
5323	3847.27	18	0.0313279
5325	3847.32	18	0.0313765
5327	3847.37	18	0.0313374
5329	3847.42	18	0.0313862
5331	3847.47	18	0.0313608
5333	3847.52	18	0.0313839
5335	3847.57	18	0.0314038
5337	3847.62	18	0.0314344
5339	3847.67	18	0.0314188
5341	3847.72	18	0.0313908
5343	3847.77	18	0.0314442
5345	3847.82	18	0.0313953
5347	3847.87	18	0.031383
5349	3847.92	18	0.0313543
5351	3847.97	18	0.0313511
5353	3848.02	18	0.0313875
5355	3848.07	18	0.0313507
5357	3848.12	18	0.0313328
5359	3848.17	18	0.0313647
5361	3848.22	18	0.031309
5363	3848.27	18	0.031338
5365	3848.32	18	0.0313901
5367	3848.37	18	0.0313384
5369	3848.42	18	0.0312947
5371	3848.47	18	0.0313266
5373	3848.52	18	0.0313397
5375	3848.57	18	0.0313628
5377	3848.62	18	0.0313299
5379	3848.67	18	0.0313012
5381	3848.72	18	0.031297
5383	3848.77	18	0.0313191
5385	3848.82	18	0.0312729
5387	3848.87	18	0.0312553
5389	3848.92	18	0.0312556
5391	3848.97	18	0.0312661
5393	3849.02	18	0.0313048
5395	3849.07	18	0.0313038
5397	3849.12	18	0.031312
5399	3849.17	18	0.0313458
5401	3849.22	18	0.0313214
5403	3849.27	18	0.0313498
5405	3849.32	18	0.0313351
5407	3849.37	18	0.031309
5409	3849.42	18	0.0313172
5411	3849.47	18	0.0313429
5413	3849.52	18	0.0313283
5415	3849.57	18	0.0313162
5417	3849.62	18	0.0312771
5419	3849.67	18	0.0313074
5421	3849.72	18	0.0312771
5423	3849.77	18	0.0313139
5425	3849.82	18	0.0313019
5427	3849.87	18	0.0313045
5429	3849.92	18	0.0313494
5431	3849.97	18	0.0313191
5433	3850.02	18	0.0312928
5435	3850.07	18	0.0313182
5437	3850.12	18	0.0313866
5439	3850.17	18	0.0313553
5441	3850.22	18	0.03138
5443	3850.27	18	0.0313677
5445	3850.32	18	0.0313354
5447	3850.37	18	0.0313559
5449	3850.42	18	0.031324
5451	3850.47	18	0.0313966
5453	3850.52	18	0.031323
5455	3850.57	18	0.0313354
5457	3850.62	18	0.0313592
5459	3850.67	18	0.031369
5461	3850.72	18	0.0313292
5463	3850.77	18	0.0312937
5465	3850.82	18	0.03131
5467	3850.87	18	0.031368
5469	3850.92	18	0.0313357
5471	3850.97	18	0.0313618
5473	3851.02	18	0.0313527
5475	3851.07	18	0.031352
5477	3851.12	18	0.031323
5479	3851.17	18	0.031298
5481	3851.22	18	0.0313068
5483	3851.27	18	0.0312911
5485	3851.32	18	0.0312752
5487	3851.37	18	0.0312381
5489	3851.42	18	0.031352
5491	3851.47	18	0.0312921
5493	3851.52	18	0.0313084
5495	3851.57	18	0.0312762
5497	3851.62	18	0.0312612
5499	3851.67	18	0.031309
5501	3851.72	18	0.0313598
5503	3851.77	18	0.0313739
5505	3851.82	18	0.0313077
5507	3851.87	18	0.0313035
5509	3851.92	18	0.0313188
5511	3851.97	18	0.0312859
5513	3852.02	18	0.0312859
5515	3852.07	18	0.0312429
5517	3852.12	18	0.0313025
5519	3852.17	18	0.0312719
5521	3852.22	18	0.0313012
5523	3852.27	18	0.0312706
5525	3852.32	18	0.0312739
5527	3852.37	18	0.0312862
5529	3852.42	18	0.0312527
5531	3852.47	18	0.03127
5533	3852.52	18	0.031268
5535	3852.57	18	0.0312674
5537	3852.62	18	0.0312182
5539	3852.67	18	0.031228
5541	3852.72	18	0.0312706
5543	3852.77	18	0.0313136
5545	3852.82	18	0.0313149
5547	3852.87	18	0.0313172
5549	3852.92	18	0.0313058
5551	3852.97	18	0.0313097
5553	3853.02	18	0.0312889
5555	3853.07	18	0.0313426
5557	3853.12	18	0.0312859
5559	3853.17	18	0.0312921
5561	3853.22	18	0.0313393
5563	3853.27	18	0.0313077
5565	3853.32	18	0.0312928
5567	3853.37	18	0.0313058
5569	3853.42	18	0.0312517
5571	3853.47	18	0.0312944
5573	3853.52	18	0.0313117
5575	3853.57	18	0.0313485
5577	3853.62	18	0.0313354
5579	3853.67	18	0.0312687
5581	3853.72	18	0.0313227
5583	3853.77	18	0.0313045
5585	3853.82	18	0.0313032
5587	3853.87	18	0.0313159
5589	3853.92	18	0.0312599
5591	3853.97	18	0.0313152
5593	3854.02	18	0.0312706
5595	3854.07	18	0.0312683
5597	3854.12	18	0.0313094
5599	3854.17	18	0.0312508
5601	3854.22	18	0.031297
5603	3854.27	18	0.0312892
5605	3854.32	18	0.0312472
5607	3854.37	18	0.0312687
5609	3854.42	18	0.0312468
5611	3854.47	18	0.0312612
5613	3854.52	18	0.0312706
5615	3854.57	18	0.0312804
5617	3854.62	18	0.0312338
5619	3854.67	18	0.0312371
5621	3854.72	18	0.0312703
5623	3854.77	18	0.0312488
5625	3854.82	18	0.0312407
5627	3854.87	18	0.0312778
5629	3854.92	18	0.0312537
5631	3854.97	18	0.0312325
5633	3855.02	18	0.0312367
5635	3855.07	18	0.0312814
5637	3855.12	18	0.0311876
5639	3855.17	18	0.0312735
5641	3855.22	18	0.0312263
5643	3855.27	18	0.0312993
5645	3855.32	18	0.0312312
5647	3855.37	18	0.0312722
5649	3855.42	18	0.0312433
5651	3855.47	18	0.0312797
5653	3855.52	18	0.0312397
5655	3855.57	18	0.0312755
5657	3855.62	18	0.031295
5659	3855.67	18	0.0312762
5661	3855.72	18	0.0312586
5663	3855.77	18	0.0312908
5665	3855.82	18	0.0312595
5667	3855.87	18	0.0312716
5669	3855.92	18	0.0313182
5671	3855.97	18	0.0313374
5673	3856.02	18	0.0313133
5675	3856.07	18	0.0313348
5677	3856.12	18	0.0313045
5679	3856.17	18	0.0312983
5681	3856.22	18	0.0313641
5683	3856.27	18	0.0313133
5685	3856.32	18	0.031366
5687	3856.37	18	0.031354
5689	3856.42	18	0.0313517
5691	3856.47	18	0.03134
5693	3856.52	18	0.03134
5695	3856.57	18	0.0313563
5697	3856.62	18	0.0313126
5699	3856.67	18	0.0313556
5701	3856.72	18	0.0313686
5703	3856.77	18	0.0312957
5705	3856.82	18	0.0314152
5707	3856.87	18	0.0313693
5709	3856.92	18	0.0313481
5711	3856.97	18	0.0312882
5713	3857.02	18	0.0313149
5715	3857.07	18	0.03134
5717	3857.12	18	0.0313247
5719	3857.17	18	0.0313058
5721	3857.22	18	0.0312996
5723	3857.27	18	0.0312384
5725	3857.32	18	0.0312628
5727	3857.37	18	0.0312713
5729	3857.42	18	0.0312599
5731	3857.47	18	0.031326
5733	3857.52	18	0.0312775
5735	3857.57	18	0.0312354
5737	3857.62	18	0.031225
5739	3857.67	18	0.0312394
5741	3857.72	18	0.0312752
5743	3857.77	18	0.0312625
5745	3857.82	18	0.0312514
5747	3857.87	18	0.0313032
5749	3857.92	18	0.0312866
5751	3857.97	18	0.0312641
5753	3858.02	18	0.0312696
5755	3858.07	18	0.031241
5757	3858.12	18	0.0312566
5759	3858.17	18	0.0312358
5761	3858.22	18	0.0312511
5763	3858.27	18	0.0312123
5765	3858.32	18	0.0312807
5767	3858.37	18	0.0312361
5769	3858.42	18	0.0312416
5771	3858.47	18	0.031267
5773	3858.52	18	0.0311635
5775	3858.57	18	0.0312
5777	3858.62	18	0.0312149
5779	3858.67	18	0.0311798
5781	3858.72	18	0.0311833
5783	3858.77	18	0.0312091
5785	3858.82	18	0.0312192
5787	3858.87	18	0.0312371
5789	3858.92	18	0.0312569
5791	3858.97	18	0.0312612
5793	3859.02	18	0.0312354
5795	3859.07	18	0.031196
5797	3859.12	18	0.0312198
5799	3859.17	18	0.0312442
5801	3859.22	18	0.0311947
5803	3859.27	18	0.0312332
5805	3859.32	18	0.0312039
5807	3859.37	18	0.0312244
5809	3859.42	18	0.0312276
5811	3859.47	18	0.0312231
5813	3859.52	18	0.0312296
5815	3859.57	18	0.0312325
5817	3859.62	18	0.0312465
5819	3859.67	18	0.0312218
5821	3859.72	18	0.0312478
5823	3859.77	18	0.0312498
5825	3859.82	18	0.0313191
5827	3859.87	18	0.0312872
5829	3859.92	18	0.0312696
5831	3859.97	18	0.0312127
5833	3860.02	18	0.0312491
5835	3860.07	18	0.0312729
5837	3860.12	18	0.0312501
5839	3860.17	18	0.0312286
5841	3860.22	18	0.031239
5843	3860.27	18	0.0313084
5845	3860.32	18	0.0312794
5847	3860.37	18	0.0312713
5849	3860.42	18	0.0313335
5851	3860.47	18	0.0313061
5853	3860.52	18	0.0312963
5855	3860.57	18	0.0313221
5857	3860.62	18	0.0313146
5859	3860.67	18	0.0312749
5861	3860.72	18	0.0312876
5863	3860.77	18	0.0312628
5865	3860.82	18	0.0312595
5867	3860.87	18	0.0312573
5869	3860.92	18	0.0312817
5871	3860.97	18	0.0312283
5873	3861.02	18	0.0312576
5875	3861.07	18	0.0311846
5877	3861.12	18	0.0312195
5879	3861.17	18	0.0312
5881	3861.22	18	0.0312065
5883	3861.27	18	0.0311872
5885	3861.32	18	0.0312416
5887	3861.37	18	0.0312586
5889	3861.42	18	0.0312175
5891	3861.47	18	0.0312452
5893	3861.52	18	0.0312687
5895	3861.57	18	0.0312592
5897	3861.62	18	0.0312569
5899	3861.67	18	0.0312237
5901	3861.72	18	0.031211
5903	3861.77	18	0.0312296
5905	3861.82	18	0.0312104
5907	3861.87	18	0.0312227
5909	3861.92	18	0.0312009
5911	3861.97	18	0.0311996
5913	3862.02	18	0.0312566
5915	3862.07	18	0.0312162
5917	3862.12	18	0.0312218
5919	3862.17	18	0.0312348
5921	3862.22	18	0.0312407
5923	3862.27	18	0.0312166
5925	3862.32	18	0.0312794
5927	3862.37	18	0.0313165
5929	3862.42	18	0.0312853
5931	3862.47	18	0.031269
5933	3862.52	18	0.0312543
5935	3862.57	18	0.0312468
5937	3862.62	18	0.0312524
5939	3862.67	18	0.0312556
5941	3862.72	18	0.0311853
5943	3862.77	18	0.0312224
5945	3862.82	18	0.0312579
5947	3862.87	18	0.0312527
5949	3862.92	18	0.0311899
5951	3862.97	18	0.031225
5953	3863.02	18	0.0312244
5955	3863.07	18	0.0311973
5957	3863.12	18	0.0312374
5959	3863.17	18	0.0312517
5961	3863.22	18	0.0312263
5963	3863.27	18	0.0312306
5965	3863.32	18	0.0312143
5967	3863.37	18	0.0312065
5969	3863.42	18	0.0312524
5971	3863.47	18	0.0312452
5973	3863.52	18	0.0312481
5975	3863.57	18	0.0312182
5977	3863.62	18	0.0312113
5979	3863.67	18	0.0312302
5981	3863.72	18	0.0312602
5983	3863.77	18	0.0312784
5985	3863.82	18	0.031227
5987	3863.87	18	0.03124
5989	3863.92	18	0.0312
5991	3863.97	18	0.031225
5993	3864.02	18	0.0312227
5995	3864.07	18	0.0312055
5997	3864.12	18	0.0312084
5999	3864.17	18	0.0312254
6001	3864.22	18	0.0312068
6003	3864.27	18	0.0312117
6005	3864.32	18	0.0312237
6007	3864.37	18	0.0312214
6009	3864.42	18	0.0312035
6011	3864.47	18	0.0312592
6013	3864.52	18	0.0311785
6015	3864.57	18	0.0311908
6017	3864.62	18	0.0311772
6019	3864.67	18	0.03117
6021	3864.72	18	0.0312384
6023	3864.77	18	0.0311772
6025	3864.82	18	0.0311912
6027	3864.87	18	0.0311928
6029	3864.92	18	0.0312299
6031	3864.97	18	0.0312081
6033	3865.02	18	0.0312133
6035	3865.07	18	0.0312283
6037	3865.12	18	0.0311785
6039	3865.17	18	0.0312019
6041	3865.22	18	0.0312367
6043	3865.27	18	0.0312061
6045	3865.32	18	0.0312296
6047	3865.37	18	0.0312595
6049	3865.42	18	0.0311859
6051	3865.47	18	0.0311785
6053	3865.52	18	0.0312348
6055	3865.57	18	0.0312003
6057	3865.62	18	0.0312009
6059	3865.67	18	0.0312517
6061	3865.72	18	0.0311866
6063	3865.77	18	0.0312446
6065	3865.82	18	0.0311843
6067	3865.87	18	0.0312618
6069	3865.92	18	0.0312856
6071	3865.97	18	0.0312495
6073	3866.02	18	0.0312827
6075	3866.07	18	0.0312745
6077	3866.12	18	0.0312589
6079	3866.17	18	0.0311915
6081	3866.22	18	0.0312325
6083	3866.27	18	0.0312159
6085	3866.32	18	0.0312231
6087	3866.37	18	0.0311794
6089	3866.42	18	0.0311641
6091	3866.47	18	0.0312029
6093	3866.52	18	0.0311736
6095	3866.57	18	0.031142
6097	3866.62	18	0.0311876
6099	3866.67	18	0.0311462
6101	3866.72	18	0.0311892
6103	3866.77	18	0.0311563
6105	3866.82	18	0.0312296
6107	3866.87	18	0.0311973
6109	3866.92	18	0.0311934
6111	3866.97	18	0.0312188
6113	3867.02	18	0.0311495
6115	3867.07	18	0.0312423
6117	3867.12	18	0.0311778
6119	3867.17	18	0.0311905
6121	3867.22	18	0.0312153
6123	3867.27	18	0.0311501
6125	3867.32	18	0.0311993
6127	3867.37	18	0.0312192
6129	3867.42	18	0.0311358
6131	3867.47	18	0.031142
6133	3867.52	18	0.0311622
6135	3867.57	18	0.0311491
6137	3867.62	18	0.0311697
6139	3867.67	18	0.0311745
6141	3867.72	18	0.031184
6143	3867.77	18	0.0311785
6145	3867.82	18	0.0311804
6147	3867.87	18	0.0312306
6149	3867.92	18	0.0311505
6151	3867.97	18	0.0311827
6153	3868.02	18	0.0311778
6155	3868.07	18	0.0311482
6157	3868.12	18	0.0311658
6159	3868.17	18	0.0311358
6161	3868.22	18	0.0311778
6163	3868.27	18	0.0311749
6165	3868.32	18	0.0311742
6167	3868.37	18	0.0312016
6169	3868.42	18	0.0312162
6171	3868.47	18	0.0311814
6173	3868.52	18	0.031239
6175	3868.57	18	0.0311749
6177	3868.62	18	0.0311791
6179	3868.67	18	0.0311749
6181	3868.72	18	0.0311853
6183	3868.77	18	0.0311182
6185	3868.82	18	0.0311726
6187	3868.87	18	0.0311439
6189	3868.92	18	0.0311342
6191	3868.97	18	0.031157
6193	3869.02	18	0.0311713
6195	3869.07	18	0.0311224
6197	3869.12	18	0.0311338
6199	3869.17	18	0.0311299
6201	3869.22	18	0.0311882
6203	3869.27	18	0.031154
6205	3869.32	18	0.0311264
6207	3869.37	18	0.0311791
6209	3869.42	18	0.0311801
6211	3869.47	18	0.0311247
6213	3869.52	18	0.031127
6215	3869.57	18	0.0311954
6217	3869.62	18	0.031157
6219	3869.67	18	0.0311843
6221	3869.72	18	0.0311592
6223	3869.77	18	0.0311221
6225	3869.82	18	0.0311505
6227	3869.87	18	0.0310974
6229	3869.92	18	0.0311462
6231	3869.97	18	0.0311394
6233	3870.02	18	0.0311377
6235	3870.07	18	0.0311361
6237	3870.12	18	0.0311508
6239	3870.17	18	0.0311299
6241	3870.22	18	0.0311254
6243	3870.27	18	0.0311423
6245	3870.32	18	0.0311312
6247	3870.37	18	0.0310342
6249	3870.42	18	0.0311384
6251	3870.47	18	0.0310677
6253	3870.52	18	0.0311368
6255	3870.57	18	0.0311156
6257	3870.62	18	0.0310964
6259	3870.67	18	0.0311084
6261	3870.72	18	0.0310847
6263	3870.77	18	0.0310684
6265	3870.82	18	0.0311208
6267	3870.87	18	0.0310964
6269	3870.92	18	0.0310847
6271	3870.97	18	0.0311169
6273	3871.02	18	0.031142
6275	3871.07	18	0.0310915
6277	3871.12	18	0.0311583
6279	3871.17	18	0.0311596
6281	3871.22	18	0.0311358
6283	3871.27	18	0.0311579
6285	3871.32	18	0.0311228
6287	3871.37	18	0.0311456
6289	3871.42	18	0.0311394
6291	3871.47	18	0.0311052
6293	3871.52	18	0.0311254
6295	3871.57	18	0.0310697
6297	3871.62	18	0.0311299
6299	3871.67	18	0.0311788
6301	3871.72	18	0.031225
6303	3871.77	18	0.0312462
6305	3871.82	18	0.0312387
6307	3871.87	18	0.0312257
6309	3871.92	18	0.0312332
6311	3871.97	18	0.0311889
6313	3872.02	18	0.031184
6315	3872.07	18	0.0311706
6317	3872.12	18	0.0311723
6319	3872.17	18	0.0311671
6321	3872.22	18	0.0311876
6323	3872.27	18	0.0312097
6325	3872.32	18	0.0311801
6327	3872.37	18	0.031169
6329	3872.42	18	0.0311185
6331	3872.47	18	0.0311306
6333	3872.52	18	0.0311237
6335	3872.57	18	0.0311172
6337	3872.62	18	0.0311618
6339	3872.67	18	0.0311325
6341	3872.72	18	0.0311127
6343	3872.77	18	0.0311557
6345	3872.82	18	0.0311938
6347	3872.87	18	0.031197
6349	3872.92	18	0.0311638
6351	3872.97	18	0.0311452
6353	3873.02	18	0.0311404
6355	3873.07	18	0.0311368
6357	3873.12	18	0.0311413
6359	3873.17	18	0.0311765
6361	3873.22	18	0.0311452
6363	3873.27	18	0.0310404
6365	3873.32	18	0.0311342
6367	3873.37	18	0.0310974
6369	3873.42	18	0.0310915
6371	3873.47	18	0.0310573
6373	3873.52	18	0.0310951
6375	3873.57	18	0.0310889
6377	3873.62	18	0.0311244
6379	3873.67	18	0.0310879
6381	3873.72	18	0.0310987
6383	3873.77	18	0.0310889
6385	3873.82	18	0.0310905
6387	3873.87	18	0.0310759
6389	3873.92	18	0.0310856
6391	3873.97	18	0.0310869
6393	3874.02	18	0.0310899
6395	3874.07	18	0.0310729
6397	3874.12	18	0.0310987
6399	3874.17	18	0.0310944
6401	3874.22	18	0.0311107
6403	3874.27	18	0.0310775
6405	3874.32	18	0.0310928
6407	3874.37	18	0.0310462
6409	3874.42	18	0.0310983
6411	3874.47	18	0.0311019
6413	3874.52	18	0.0310954
6415	3874.57	18	0.0310755
6417	3874.62	18	0.0310879
6419	3874.67	18	0.0311032
6421	3874.72	18	0.031141
6423	3874.77	18	0.0310944
6425	3874.82	18	0.031069
6427	3874.87	18	0.03103
6429	3874.92	18	0.0310567
6431	3874.97	18	0.0310681
6433	3875.02	18	0.0310905
6435	3875.07	18	0.0310713
6437	3875.12	18	0.0310944
6439	3875.17	18	0.0311338
6441	3875.22	18	0.0310684
6443	3875.27	18	0.0311127
6445	3875.32	18	0.0311215
6447	3875.37	18	0.0310746
6449	3875.42	18	0.0310684
6451	3875.47	18	0.0310563
6453	3875.52	18	0.0311172
6455	3875.57	18	0.0310967
6457	3875.62	18	0.0310729
6459	3875.67	18	0.0310863
6461	3875.72	18	0.0310303
6463	3875.77	18	0.0311032
6465	3875.82	18	0.0310749
6467	3875.87	18	0.0311628
6469	3875.92	18	0.0310961
6471	3875.97	18	0.0310928
6473	3876.02	18	0.0310912
6475	3876.07	18	0.031097
6477	3876.12	18	0.031069
6479	3876.17	18	0.0310993
6481	3876.22	18	0.0310977
6483	3876.27	18	0.0310938
6485	3876.32	18	0.0310944
6487	3876.37	18	0.0310882
6489	3876.42	18	0.0310961
6491	3876.47	18	0.0310827
6493	3876.52	18	0.0310423
6495	3876.57	18	0.0311179
6497	3876.62	18	0.0311306
6499	3876.67	18	0.0311465
6501	3876.72	18	0.0311104
6503	3876.77	18	0.0311221
6505	3876.82	18	0.0311029
6507	3876.87	18	0.0310948
6509	3876.92	18	0.0310192
6511	3876.97	18	0.0311208
6513	3877.02	18	0.0310521
6515	3877.07	18	0.0311231
6517	3877.12	18	0.0311189
6519	3877.17	18	0.0310879
6521	3877.22	18	0.0310505
6523	3877.27	18	0.0310436
6525	3877.32	18	0.0310674
6527	3877.37	18	0.0311153
6529	3877.42	18	0.0311013
6531	3877.47	18	0.0310593
6533	3877.52	18	0.0310596
6535	3877.57	18	0.0310765
6537	3877.62	18	0.0310964
6539	3877.67	18	0.0310361
6541	3877.72	18	0.0310537
6543	3877.77	18	0.031057
6545	3877.82	18	0.0310358
6547	3877.87	18	0.0310169
6549	3877.92	18	0.0310599
6551	3877.97	18	0.0310107
6553	3878.02	18	0.0310576
6555	3878.07	18	0.0310863
6557	3878.12	18	0.0311221
6559	3878.17	18	0.0311309
6561	3878.22	18	0.031086
6563	3878.27	18	0.0310677
6565	3878.32	18	0.0311215
6567	3878.37	18	0.0310339
6569	3878.42	18	0.031085
6571	3878.47	18	0.0310811
6573	3878.52	18	0.0310508
6575	3878.57	18	0.0310853
6577	3878.62	18	0.0310798
6579	3878.67	18	0.0311137
6581	3878.72	18	0.0310541
6583	3878.77	18	0.0310817
6585	3878.82	18	0.0310948
6587	3878.87	18	0.031044
6589	3878.92	18	0.0310371
6591	3878.97	18	0.0310495
6593	3879.02	18	0.0310742
6595	3879.07	18	0.0310016
6597	3879.12	18	0.031016
6599	3879.17	18	0.0310368
6601	3879.22	18	0.0310104
6603	3879.27	18	0.0310313
6605	3879.32	18	0.0309948
6607	3879.37	18	0.0310221
6609	3879.42	18	0.0309661
6611	3879.47	18	0.0309557
6613	3879.52	18	0.0309684
6615	3879.57	18	0.0309609
6617	3879.62	18	0.030999
6619	3879.67	18	0.030987
6621	3879.72	18	0.0308987
6623	3879.77	18	0.0309515
6625	3879.82	18	0.0310088
6627	3879.87	18	0.031027
6629	3879.92	18	0.030931
6631	3879.97	18	0.0309866
6633	3880.02	18	0.0309645
6635	3880.07	18	0.0309932
6637	3880.12	18	0.030998
6639	3880.17	18	0.031028
6641	3880.22	18	0.0309684
6643	3880.27	18	0.0309866
6645	3880.32	18	0.0310381
6647	3880.37	18	0.0310596
6649	3880.42	18	0.0309847
6651	3880.47	18	0.0310042
6653	3880.52	18	0.0310072
6655	3880.57	18	0.0309853
6657	3880.62	18	0.0309743
6659	3880.67	18	0.0309632
6661	3880.72	18	0.0309876
6663	3880.77	18	0.03103
6665	3880.82	18	0.0309704
6667	3880.87	18	0.0310059
6669	3880.92	18	0.0310111
6671	3880.97	18	0.0309222
6673	3881.02	18	0.0309717
6675	3881.07	18	0.0309518
6677	3881.12	18	0.0309339
6679	3881.17	18	0.030929
6681	3881.22	18	0.031
6683	3881.27	18	0.0309971
6685	3881.32	18	0.030916
6687	3881.37	18	0.0309652
6689	3881.42	18	0.0309603
6691	3881.47	18	0.0309769
6693	3881.52	18	0.0309186
6695	3881.57	18	0.0309212
6697	3881.62	18	0.0309101
6699	3881.67	18	0.0309345
6701	3881.72	18	0.0309056
6703	3881.77	18	0.0309668
6705	3881.82	18	0.0309368
6707	3881.87	18	0.0309993
6709	3881.92	18	0.0309479
6711	3881.97	18	0.0309779
6713	3882.02	18	0.0309515
6715	3882.07	18	0.031
6717	3882.12	18	0.0309674
6719	3882.17	18	0.0309879
6721	3882.22	18	0.0309176
6723	3882.27	18	0.0309186
6725	3882.32	18	0.0309534
6727	3882.37	18	0.030973
6729	3882.42	18	0.0309225
6731	3882.47	18	0.030944
6733	3882.52	18	0.030931
6735	3882.57	18	0.0309179
6737	3882.62	18	0.0309143
6739	3882.67	18	0.0309261
6741	3882.72	18	0.0309388
6743	3882.77	18	0.0309358
6745	3882.82	18	0.0308997
6747	3882.87	18	0.0309469
6749	3882.92	18	0.0309254
6751	3882.97	18	0.0309479
6753	3883.02	18	0.0309339
6755	3883.07	18	0.0309065
6757	3883.12	18	0.0309231
6759	3883.17	18	0.0309557
6761	3883.22	18	0.0308889
6763	3883.27	18	0.0309231
6765	3883.32	18	0.0309612
6767	3883.37	18	0.0308984
6769	3883.42	18	0.0308876
6771	3883.47	18	0.0309713
6773	3883.52	18	0.0308873
6775	3883.57	18	0.0309515
6777	3883.62	18	0.0309899
6779	3883.67	18	0.0309658
6781	3883.72	18	0.0309824
6783	3883.77	18	0.0309384
6785	3883.82	18	0.0309642
6787	3883.87	18	0.030957
6789	3883.92	18	0.0309912
6791	3883.97	18	0.0310208
6793	3884.02	18	0.0309792
6795	3884.07	18	0.0309762
6797	3884.12	18	0.0309997
6799	3884.17	18	0.0309398
6801	3884.22	18	0.0309749
6803	3884.27	18	0.0310127
6805	3884.32	18	0.0309437
6807	3884.37	18	0.0309616
6809	3884.42	18	0.0309674
6811	3884.47	18	0.0309586
6813	3884.52	18	0.0309257
6815	3884.57	18	0.0309046
6817	3884.62	18	0.0310036
6819	3884.67	18	0.0309297
6821	3884.72	18	0.0309365
6823	3884.77	18	0.0309492
6825	3884.82	18	0.0309323
6827	3884.87	18	0.0309502
6829	3884.92	18	0.0309879
6831	3884.97	18	0.0309284
6833	3885.02	18	0.0309577
6835	3885.07	18	0.030959
6837	3885.12	18	0.0309964
6839	3885.17	18	0.0309577
6841	3885.22	18	0.03097
6843	3885.27	18	0.0309371
6845	3885.32	18	0.0309525
6847	3885.37	18	0.0309515
6849	3885.42	18	0.0309342
6851	3885.47	18	0.0309586
6853	3885.52	18	0.0309717
6855	3885.57	18	0.0309788
6857	3885.62	18	0.0309228
6859	3885.67	18	0.0309166
6861	3885.72	18	0.0309358
6863	3885.77	18	0.0309398
6865	3885.82	18	0.0308925
6867	3885.87	18	0.0309358
6869	3885.92	18	0.0309003
6871	3885.97	18	0.0308971
6873	3886.02	18	0.0309381
6875	3886.07	18	0.0309411
6877	3886.12	18	0.0309264
6879	3886.17	18	0.0309482
6881	3886.22	18	0.0308886
6883	3886.27	18	0.0309007
6885	3886.32	18	0.0308906
6887	3886.37	18	0.0309153
6889	3886.42	18	0.0310127
6891	3886.47	18	0.0310085
6893	3886.52	18	0.0310199
6895	3886.57	18	0.0309971
6897	3886.62	18	0.0310501
6899	3886.67	18	0.0310391
6901	3886.72	18	0.0310182
6903	3886.77	18	0.0309906
6905	3886.82	18	0.0310156
6907	3886.87	18	0.0310026
6909	3886.92	18	0.0309196
6911	3886.97	18	0.0309879
6913	3887.02	18	0.0309554
6915	3887.07	18	0.0309625
6917	3887.12	18	0.0309625
6919	3887.17	18	0.0309853
6921	3887.22	18	0.0310101
6923	3887.27	18	0.0309765
6925	3887.32	18	0.0309681
6927	3887.37	18	0.0309997
6929	3887.42	18	0.0309792
6931	3887.47	18	0.0309948
6933	3887.52	18	0.0309638
6935	3887.57	18	0.0309498
6937	3887.62	18	0.0309801
6939	3887.67	18	0.0308984
6941	3887.72	18	0.0309417
6943	3887.77	18	0.0309616
6945	3887.82	18	0.0309645
6947	3887.87	18	0.0309554
6949	3887.92	18	0.0309557
6951	3887.97	18	0.0309306
6953	3888.02	18	0.0309547
6955	3888.07	18	0.030927
6957	3888.12	18	0.0309749
6959	3888.17	18	0.0310046
6961	3888.22	18	0.0309752
6963	3888.27	18	0.0309932
6965	3888.32	18	0.030945
6967	3888.37	18	0.03097
6969	3888.42	18	0.0309665
6971	3888.47	18	0.0310241
6973	3888.52	18	0.0310342
6975	3888.57	18	0.0310729
6977	3888.62	18	0.0311023
6979	3888.67	18	0.0311029
6981	3888.72	18	0.0310964
6983	3888.77	18	0.0310322
6985	3888.82	18	0.0309958
6987	3888.87	18	0.0310225
6989	3888.92	18	0.0309619
6991	3888.97	18	0.0309879
6993	3889.02	18	0.030987
6995	3889.07	18	0.0310384
6997	3889.12	18	0.0310534
6999	3889.17	18	0.0310072
7001	3889.22	18	0.0310049
7003	3889.27	18	0.0309779
7005	3889.32	18	0.0309134
7007	3889.37	18	0.0310049
7009	3889.42	18	0.0309948
7011	3889.47	18	0.0310339
7013	3889.52	18	0.0310033
7015	3889.57	18	0.0309866
7017	3889.62	18	0.0309909
7019	3889.67	18	0.0309997
7021	3889.72	18	0.031013
7023	3889.77	18	0.0309837
7025	3889.82	18	0.03097
7027	3889.87	18	0.0309495
7029	3889.92	18	0.0309557
7031	3889.97	18	0.0309544
7033	3890.02	18	0.030913
7035	3890.07	18	0.030917
7037	3890.12	18	0.0309476
7039	3890.17	18	0.0309225
7041	3890.22	18	0.0309599
7043	3890.27	18	0.0308997
7045	3890.32	18	0.0309518
7047	3890.37	18	0.030903
7049	3890.42	18	0.0309091
7051	3890.47	18	0.0309003
7053	3890.52	18	0.0308932
7055	3890.57	18	0.0309091
7057	3890.62	18	0.0309215
7059	3890.67	18	0.0309739
7061	3890.72	18	0.0309648
7063	3890.77	18	0.0310075
7065	3890.82	18	0.0310648
7067	3890.87	18	0.0310475
7069	3890.92	18	0.0310023
7071	3890.97	18	0.0309915
7073	3891.02	18	0.0309958
7075	3891.07	18	0.0309228
7077	3891.12	18	0.0309915
7079	3891.17	18	0.031015
7081	3891.22	18	0.0310062
7083	3891.27	18	0.0309909
7085	3891.32	18	0.0309521
7087	3891.37	18	0.0309678
7089	3891.42	18	0.031013
7091	3891.47	18	0.0309622
7093	3891.52	18	0.0309847
7095	3891.57	18	0.03093
7097	3891.62	18	0.0309085
7099	3891.67	18	0.0309443
7101	3891.72	18	0.0309417
7103	3891.77	18	0.030928
7105	3891.82	18	0.0309205
7107	3891.87	18	0.0309443
7109	3891.92	18	0.0309218
7111	3891.97	18	0.0309251
7113	3892.02	18	0.0309199
7115	3892.07	18	0.0309134
7117	3892.12	18	0.0309007
7119	3892.17	18	0.0308909
7121	3892.22	18	0.0309134
7123	3892.27	18	0.0309339
7125	3892.32	18	0.0309619
7127	3892.37	18	0.0309043
7129	3892.42	18	0.0309329
7131	3892.47	18	0.0309072
7133	3892.52	18	0.0309476
7135	3892.57	18	0.0309502
7137	3892.62	18	0.0309326
7139	3892.67	18	0.0309287
7141	3892.72	18	0.0309599
7143	3892.77	18	0.0309082
7145	3892.82	18	0.0309173
7147	3892.87	18	0.0309303
7149	3892.92	18	0.030927
7151	3892.97	18	0.0309248
7153	3893.02	18	0.0308717
7155	3893.07	18	0.0309173
7157	3893.12	18	0.0309104
7159	3893.17	18	0.0309157
7161	3893.22	18	0.0308925
7163	3893.27	18	0.0308639
7165	3893.32	18	0.0308727
7167	3893.37	18	0.0308723
7169	3893.42	18	0.0309069
7171	3893.47	18	0.0308521
7173	3893.52	18	0.0308349
7175	3893.57	18	0.0308903
7177	3893.62	18	0.0308893
7179	3893.67	18	0.0308541
7181	3893.72	18	0.0308326
7183	3893.77	18	0.0309023
7185	3893.82	18	0.0309147
7187	3893.87	18	0.0308723
7189	3893.92	18	0.0308642
7191	3893.97	18	0.0308531
7193	3894.02	18	0.03083
7195	3894.07	18	0.0308961
7197	3894.12	18	0.0309228
7199	3894.17	18	0.0308691
7201	3894.22	18	0.0308749
7203	3894.27	18	0.0308929
7205	3894.32	18	0.0308473
7207	3894.37	18	0.0309202
7209	3894.42	18	0.0309095
7211	3894.47	18	0.0308929
7213	3894.52	18	0.0309345
7215	3894.57	18	0.0308938
7217	3894.62	18	0.0308616
7219	3894.67	18	0.0308987
7221	3894.72	18	0.0308697
7223	3894.77	18	0.0308831
7225	3894.82	18	0.030903
7227	3894.87	18	0.0309248
7229	3894.92	18	0.0309336
7231	3894.97	18	0.0309974
7233	3895.02	18	0.0309655
7235	3895.07	18	0.0309437
7237	3895.12	18	0.0309505
7239	3895.17	18	0.0309642
7241	3895.22	18	0.0309339
7243	3895.27	18	0.0309427
7245	3895.32	18	0.0309352
7247	3895.37	18	0.0309264
7249	3895.42	18	0.030931
7251	3895.47	18	0.0309388
7253	3895.52	18	0.0308987
7255	3895.57	18	0.030903
7257	3895.62	18	0.0308684
7259	3895.67	18	0.0308798
7261	3895.72	18	0.0308789
7263	3895.77	18	0.0308466
7265	3895.82	18	0.0308697
7267	3895.87	18	0.0308544
7269	3895.92	18	0.0308346
7271	3895.97	18	0.0308385
7273	3896.02	18	0.0308977
7275	3896.07	18	0.0308714
7277	3896.12	18	0.0308333
7279	3896.17	18	0.0308447
7281	3896.22	18	0.0308284
7283	3896.27	18	0.030832
7285	3896.32	18	0.0308736
7287	3896.37	18	0.0308531
7289	3896.42	18	0.0308456
7291	3896.47	18	0.0308274
7293	3896.52	18	0.0308378
7295	3896.57	18	0.0308831
7297	3896.62	18	0.0308375
7299	3896.67	18	0.0308792
7301	3896.72	18	0.0309
7303	3896.77	18	0.0308007
7305	3896.82	18	0.0308857
7307	3896.87	18	0.0308622
7309	3896.92	18	0.0308401
7311	3896.97	18	0.0308144
7313	3897.02	18	0.0308863
7315	3897.07	18	0.0308697
7317	3897.12	18	0.030858
7319	3897.17	18	0.0308743
7321	3897.22	18	0.0308867
7323	3897.27	18	0.0308772
7325	3897.32	18	0.0308671
7327	3897.37	18	0.0308772
7329	3897.42	18	0.0308554
7331	3897.47	18	0.0309199
7333	3897.52	18	0.0309114
7335	3897.57	18	0.0309277
7337	3897.62	18	0.0309157
7339	3897.67	18	0.0309157
7341	3897.72	18	0.0308886
7343	3897.77	18	0.0308867
7345	3897.82	18	0.0309166
7347	3897.87	18	0.0309303
7349	3897.92	18	0.0308906
7351	3897.97	18	0.0309183
7353	3898.02	18	0.0308652
7355	3898.07	18	0.0308964
7357	3898.12	18	0.0308658
7359	3898.17	18	0.030845
7361	3898.22	18	0.0308515
7363	3898.27	18	0.0308691
7365	3898.32	18	0.0308147
7367	3898.37	18	0.0308645
7369	3898.42	18	0.0308736
7371	3898.47	18	0.0308629
7373	3898.52	18	0.030871
7375	3898.57	18	0.0309349
7377	3898.62	18	0.0309525
7379	3898.67	18	0.0309143
7381	3898.72	18	0.0309326
7383	3898.77	18	0.0309137
7385	3898.82	18	0.0309026
7387	3898.87	18	0.0309319
7389	3898.92	18	0.0309352
7391	3898.97	18	0.0308736
7393	3899.02	18	0.0309801
7395	3899.07	18	0.0309687
7397	3899.12	18	0.0308929
7399	3899.17	18	0.0309254
7401	3899.22	18	0.0308925
7403	3899.27	18	0.0309225
7405	3899.32	18	0.0308893
7407	3899.37	18	0.0308886
7409	3899.42	18	0.0308961
7411	3899.47	18	0.030874
7413	3899.52	18	0.030873
7415	3899.57	18	0.0308818
7417	3899.62	18	0.0308694
7419	3899.67	18	0.0309075
7421	3899.72	18	0.03086
7423	3899.77	18	0.0309072
7425	3899.82	18	0.0308414
7427	3899.87	18	0.0308883
7429	3899.92	18	0.0308785
7431	3899.97	18	0.0308782
7433	3900.02	18	0.0308476
7435	3900.07	18	0.0308512
7437	3900.12	18	0.0308635
7439	3900.17	18	0.0308316
7441	3900.22	18	0.0308769
7443	3900.27	18	0.0308303
7445	3900.32	18	0.0309117
7447	3900.37	18	0.0308567
7449	3900.42	18	0.0308857
7451	3900.47	18	0.0308867
7453	3900.52	18	0.0307984
7455	3900.57	18	0.0308414
7457	3900.62	18	0.0308805
7459	3900.67	18	0.0308727
7461	3900.72	18	0.0308662
7463	3900.77	18	0.0308251
7465	3900.82	18	0.0308723
7467	3900.87	18	0.0308085
7469	3900.92	18	0.030901
7471	3900.97	18	0.0308684
7473	3901.02	18	0.0308381
7475	3901.07	18	0.030828
7477	3901.12	18	0.0308808
7479	3901.17	18	0.0308652
7481	3901.22	18	0.0309111
7483	3901.27	18	0.0308648
7485	3901.32	18	0.0308577
7487	3901.37	18	0.0308417
7489	3901.42	18	0.0308704
7491	3901.47	18	0.0308629
7493	3901.52	18	0.0308408
7495	3901.57	18	0.0308762
7497	3901.62	18	0.030804
7499	3901.67	18	0.0308642
7501	3901.72	18	0.0308473
7503	3901.77	18	0.030885
7505	3901.82	18	0.030814
7507	3901.87	18	0.0308372
7509	3901.92	18	0.0308518
7511	3901.97	18	0.0308531
7513	3902.02	18	0.0309121
7515	3902.07	18	0.0309251
7517	3902.12	18	0.0308919
7519	3902.17	18	0.0308544
7521	3902.22	18	0.0308775
7523	3902.27	18	0.0308515
7525	3902.32	18	0.0308267
7527	3902.37	18	0.0308554
7529	3902.42	18	0.0308365
7531	3902.47	18	0.030786
7533	3902.52	18	0.0308329
7535	3902.57	18	0.0308232
7537	3902.62	18	0.0307906
7539	3902.67	18	0.0308261
7541	3902.72	18	0.030832
7543	3902.77	18	0.0308267
7545	3902.82	18	0.0308147
7547	3902.87	18	0.0308199
7549	3902.92	18	0.0307828
7551	3902.97	18	0.0308092
7553	3903.02	18	0.0307899
7555	3903.07	18	0.0307886
7557	3903.12	18	0.0308124
7559	3903.17	18	0.0307825
7561	3903.22	18	0.0308004
7563	3903.27	18	0.0308505
7565	3903.32	18	0.030773
7567	3903.37	18	0.0307873
7569	3903.42	18	0.0307746
7571	3903.47	18	0.0308277
7573	3903.52	18	0.0308017
7575	3903.57	18	0.0307952
7577	3903.62	18	0.0308349
7579	3903.67	18	0.0308017
7581	3903.72	18	0.0307613
7583	3903.77	18	0.030832
7585	3903.82	18	0.0307984
7587	3903.87	18	0.0308189
7589	3903.92	18	0.0308114
7591	3903.97	18	0.0308167
7593	3904.02	18	0.0308372
7595	3904.07	18	0.030789
7597	3904.12	18	0.0307906
7599	3904.17	18	0.030817
7601	3904.22	18	0.0308072
7603	3904.27	18	0.0308241
7605	3904.32	18	0.0308258
7607	3904.37	18	0.0308163
7609	3904.42	18	0.0308512
7611	3904.47	18	0.0308066
7613	3904.52	18	0.0308069
7615	3904.57	18	0.0308746
7617	3904.62	18	0.0308466
7619	3904.67	18	0.0308323
7621	3904.72	18	0.0308303
7623	3904.77	18	0.0308512
7625	3904.82	18	0.0307942
7627	3904.87	18	0.0308434
7629	3904.92	18	0.0308632
7631	3904.97	18	0.0308176
7633	3905.02	18	0.0308336
7635	3905.07	18	0.0308531
7637	3905.12	18	0.0308502
7639	3905.17	18	0.0308564
7641	3905.22	18	0.0308173
7643	3905.27	18	0.0308271
7645	3905.32	18	0.0308023
7647	3905.37	18	0.0308821
7649	3905.42	18	0.0307746
7651	3905.47	18	0.0307906
7653	3905.52	18	0.0308183
7655	3905.57	18	0.0307668
7657	3905.62	18	0.0307724
7659	3905.67	18	0.0307711
7661	3905.72	18	0.0307955
7663	3905.77	18	0.0307492
7665	3905.82	18	0.0307685
7667	3905.87	18	0.0307479
7669	3905.92	18	0.0307847
7671	3905.97	18	0.0307629
7673	3906.02	18	0.0307528
7675	3906.07	18	0.0307007
7677	3906.12	18	0.0306988
7679	3906.17	18	0.0306776
7681	3906.22	18	0.0306965
7683	3906.27	18	0.0306727
7685	3906.32	18	0.0307704
7687	3906.37	18	0.0307434
7689	3906.42	18	0.0307339
7691	3906.47	18	0.0307873
7693	3906.52	18	0.0307238
7695	3906.57	18	0.0307317
7697	3906.62	18	0.0307473
7699	3906.67	18	0.0307369
7701	3906.72	18	0.0307769
7703	3906.77	18	0.0307418
7705	3906.82	18	0.0307489
7707	3906.87	18	0.0307486
7709	3906.92	18	0.0307574
7711	3906.97	18	0.0307343
7713	3907.02	18	0.0307792
7715	3907.07	18	0.0307398
7717	3907.12	18	0.0307606
7719	3907.17	18	0.0307492
7721	3907.22	18	0.0307759
7723	3907.27	18	0.0307457
7725	3907.32	18	0.0307264
7727	3907.37	18	0.030761
7729	3907.42	18	0.0307483
7731	3907.47	18	0.0307378
7733	3907.52	18	0.0307457
7735	3907.57	18	0.0307476
7737	3907.62	18	0.0307352
7739	3907.67	18	0.0307307
7741	3907.72	18	0.0307066
7743	3907.77	18	0.030731
7745	3907.82	18	0.0306975
7747	3907.87	18	0.0306861
7749	3907.92	18	0.0307098
7751	3907.97	18	0.0307603
7753	3908.02	18	0.0307105
7755	3908.07	18	0.0307118
7757	3908.12	18	0.0307079
7759	3908.17	18	0.0307408
7761	3908.22	18	0.0307489
7763	3908.27	18	0.0307238
7765	3908.32	18	0.030804
7767	3908.37	18	0.030803
7769	3908.42	18	0.0307737
7771	3908.47	18	0.0307916
7773	3908.52	18	0.0307593
7775	3908.57	18	0.0307815
7777	3908.62	18	0.0307701
7779	3908.67	18	0.0307561
7781	3908.72	18	0.0307473
7783	3908.77	18	0.0307584
7785	3908.82	18	0.0307727
7787	3908.87	18	0.030772
7789	3908.92	18	0.0307815
7791	3908.97	18	0.0307629
7793	3909.02	18	0.0307873
7795	3909.07	18	0.030789
7797	3909.12	18	0.0308245
7799	3909.17	18	0.0307043
7801	3909.22	18	0.030732
7803	3909.27	18	0.0307597
7805	3909.32	18	0.0307838
7807	3909.37	18	0.0307932
7809	3909.42	18	0.0307571
7811	3909.47	18	0.0307772
7813	3909.52	18	0.0307766
7815	3909.57	18	0.0307525
7817	3909.62	18	0.0307857
7819	3909.67	18	0.0308
7821	3909.72	18	0.0307965
7823	3909.77	18	0.0307795
7825	3909.82	18	0.0308173
7827	3909.87	18	0.03073
7829	3909.92	18	0.0307509
7831	3909.97	18	0.0307512
7833	3910.02	18	0.0307349
7835	3910.07	18	0.0307857
7837	3910.12	18	0.0307372
7839	3910.17	18	0.0307489
7841	3910.22	18	0.0307834
7843	3910.27	18	0.0307909
7845	3910.32	18	0.0308033
7847	3910.37	18	0.0307711
7849	3910.42	18	0.0308277
7851	3910.47	18	0.030859
7853	3910.52	18	0.0309824
7855	3910.57	18	0.0309134
7857	3910.62	18	0.0308326
7859	3910.67	18	0.0309166
7861	3910.72	18	0.0308841
7863	3910.77	18	0.0309398
7865	3910.82	18	0.0309876
7867	3910.87	18	0.0309059
7869	3910.92	18	0.0309186
7871	3910.97	18	0.0309694
7873	3911.02	18	0.0310143
7875	3911.07	18	0.0309925
7877	3911.12	18	0.0309274
7879	3911.17	18	0.0309319
7881	3911.22	18	0.0309782
7883	3911.27	18	0.0309652
7885	3911.32	18	0.0309137
7887	3911.37	18	0.0309209
7889	3911.42	18	0.0308886
7891	3911.47	18	0.0309186
7893	3911.52	18	0.0309326
7895	3911.57	18	0.0309394
7897	3911.62	18	0.0309264
7899	3911.67	18	0.0308736
7901	3911.72	18	0.0308841
7903	3911.77	18	0.0309297
7905	3911.82	18	0.0308629
7907	3911.87	18	0.0308779
7909	3911.92	18	0.0308609
7911	3911.97	18	0.0309153
7913	3912.02	18	0.0308557
7915	3912.07	18	0.0309469
7917	3912.12	18	0.0308828
7919	3912.17	18	0.0309127
7921	3912.22	18	0.0308977
7923	3912.27	18	0.0309192
7925	3912.32	18	0.0308945
7927	3912.37	18	0.0309046
7929	3912.42	18	0.0308287
7931	3912.47	18	0.0308984
7933	3912.52	18	0.0308834
7935	3912.57	18	0.0308981
7937	3912.62	18	0.0309238
7939	3912.67	18	0.0308994
7941	3912.72	18	0.0308876
7943	3912.77	18	0.0308574
7945	3912.82	18	0.0308622
7947	3912.87	18	0.0308795
7949	3912.92	18	0.0308365
7951	3912.97	18	0.0309349
7953	3913.02	18	0.0309284
7955	3913.07	18	0.030927
7957	3913.12	18	0.0308342
7959	3913.17	18	0.0309036
7961	3913.22	18	0.030885
7963	3913.27	18	0.0308359
7965	3913.32	18	0.030804
7967	3913.37	18	0.0307886
7969	3913.42	18	0.0308
7971	3913.47	18	0.0308225
7973	3913.52	18	0.0308749
7975	3913.57	18	0.0308209
7977	3913.62	18	0.0307825
7979	3913.67	18	0.0307505
7981	3913.72	18	0.0307974
7983	3913.77	18	0.0307619
7985	3913.82	18	0.030774
7987	3913.87	18	0.0308173
7989	3913.92	18	0.0307724
7991	3913.97	18	0.030814
7993	3914.02	18	0.0307805
7995	3914.07	18	0.0307769
7997	3914.12	18	0.0307668
7999	3914.17	18	0.0307245
8001	3914.22	18	0.0307232
8003	3914.27	18	0.0307229
8005	3914.32	18	0.0307294
8007	3914.37	18	0.0306978
8009	3914.42	18	0.0307733
8011	3914.47	18	0.0307245
8013	3914.52	18	0.0307141
8015	3914.57	18	0.0307444
8017	3914.62	18	0.0307248
8019	3914.67	18	0.0307287
8021	3914.72	18	0.0307724
8023	3914.77	18	0.0307375
8025	3914.82	18	0.0307489
8027	3914.87	18	0.0307626
8029	3914.92	18	0.0307626
8031	3914.97	18	0.0307935
8033	3915.02	18	0.0307821
8035	3915.07	18	0.0307424
8037	3915.12	18	0.0307704
8039	3915.17	18	0.0306909
8041	3915.22	18	0.0307255
8043	3915.27	18	0.0307307
8045	3915.32	18	0.0307229
8047	3915.37	18	0.0307007
8049	3915.42	18	0.030731
8051	3915.47	18	0.030732
8053	3915.52	18	0.0307186
8055	3915.57	18	0.0307724
8057	3915.62	18	0.0307873
8059	3915.67	18	0.0307121
8061	3915.72	18	0.03076
8063	3915.77	18	0.0307785
8065	3915.82	18	0.0307574
8067	3915.87	18	0.0307043
8069	3915.92	18	0.0307421
8071	3915.97	18	0.0306678
8073	3916.02	18	0.030731
8075	3916.07	18	0.0307756
8077	3916.12	18	0.0306848
8079	3916.17	18	0.0307571
8081	3916.22	18	0.0307369
8083	3916.27	18	0.0307375
8085	3916.32	18	0.0307437
8087	3916.37	18	0.0307333
8089	3916.42	18	0.0307489
8091	3916.47	18	0.0306939
8093	3916.52	18	0.0307675
8095	3916.57	18	0.030746
8097	3916.62	18	0.030759
8099	3916.67	18	0.0307525
8101	3916.72	18	0.030719
8103	3916.77	18	0.0307763
8105	3916.82	18	0.0307173
8107	3916.87	18	0.0307336
8109	3916.92	18	0.0307092
8111	3916.97	18	0.0307313
8113	3917.02	18	0.0307095
8115	3917.07	18	0.0307528
8117	3917.12	18	0.0307251
8119	3917.17	18	0.0307372
8121	3917.22	18	0.0307382
8123	3917.27	18	0.0306988
8125	3917.32	18	0.0307587
8127	3917.37	18	0.0307691
8129	3917.42	18	0.0307261
8131	3917.47	18	0.0307571
8133	3917.52	18	0.0307743
8135	3917.57	18	0.0307391
8137	3917.62	18	0.030747
8139	3917.67	18	0.0307177
8141	3917.72	18	0.0307626
8143	3917.77	18	0.0306984
8145	3917.82	18	0.0307199
8147	3917.87	18	0.0307196
8149	3917.92	18	0.0306812
8151	3917.97	18	0.0307427
8153	3918.02	18	0.030731
8155	3918.07	18	0.0307518
8157	3918.12	18	0.0307515
8159	3918.17	18	0.0307216
8161	3918.22	18	0.0308017
8163	3918.27	18	0.0307496
8165	3918.32	18	0.0307268
8167	3918.37	18	0.0307304
8169	3918.42	18	0.0307404
8171	3918.47	18	0.0307737
8173	3918.52	18	0.0307763
8175	3918.57	18	0.03073
8177	3918.62	18	0.0307336
8179	3918.67	18	0.0307388
8181	3918.72	18	0.0307759
8183	3918.77	18	0.0307616
8185	3918.82	18	0.0307711
8187	3918.87	18	0.0306971
8189	3918.92	18	0.0307375
8191	3918.97	18	0.0307645
8193	3919.02	18	0.030773
8195	3919.07	18	0.0307584
8197	3919.12	18	0.0307365
8199	3919.17	18	0.0307691
8201	3919.22	18	0.0307232
8203	3919.27	18	0.030744
8205	3919.32	18	0.0307036
8207	3919.37	18	0.0307746
8209	3919.42	18	0.0307597
8211	3919.47	18	0.0307857
8213	3919.52	18	0.0308017
8215	3919.57	18	0.0307606
8217	3919.62	18	0.0307714
8219	3919.67	18	0.0306828
8221	3919.72	18	0.0307785
8223	3919.77	18	0.0307033
8225	3919.82	18	0.0307431
8227	3919.87	18	0.0307652
8229	3919.92	18	0.030732
8231	3919.97	18	0.0307063
8233	3920.02	18	0.0307206
8235	3920.07	18	0.0307629
8237	3920.12	18	0.0307343
8239	3920.17	18	0.0306903
8241	3920.22	18	0.0307154
8243	3920.27	18	0.0306854
8245	3920.32	18	0.0306926
8247	3920.37	18	0.0307613
8249	3920.42	18	0.0307076
8251	3920.47	18	0.030717
8253	3920.52	18	0.0307476
8255	3920.57	18	0.0307313
8257	3920.62	18	0.0307141
8259	3920.67	18	0.0306779
8261	3920.72	18	0.0306594
8263	3920.77	18	0.0306828
8265	3920.82	18	0.030704
8267	3920.87	18	0.0307567
8269	3920.92	18	0.0306835
8271	3920.97	18	0.0306333
8273	3921.02	18	0.0307085
8275	3921.07	18	0.0306867
8277	3921.12	18	0.030689
8279	3921.17	18	0.0307352
8281	3921.22	18	0.0306734
8283	3921.27	18	0.0307476
8285	3921.32	18	0.0307421
8287	3921.37	18	0.0307434
8289	3921.42	18	0.0307333
8291	3921.47	18	0.0307281
8293	3921.52	18	0.0307564
8295	3921.57	18	0.0307232
8297	3921.62	18	0.0307108
8299	3921.67	18	0.0307515
8301	3921.72	18	0.0307095
8303	3921.77	18	0.0307141
8305	3921.82	18	0.0306854
8307	3921.87	18	0.0307281
8309	3921.92	18	0.0307186
8311	3921.97	18	0.0307727
8313	3922.02	18	0.0307486
8315	3922.07	18	0.0307232
8317	3922.12	18	0.0307027
8319	3922.17	18	0.0307063
8321	3922.22	18	0.0307193
8323	3922.27	18	0.0306952
8325	3922.32	18	0.0307076
8327	3922.37	18	0.0307199
8329	3922.42	18	0.0306841
8331	3922.47	18	0.0307069
8333	3922.52	18	0.030717
8335	3922.57	18	0.0307076
8337	3922.62	18	0.0307427
8339	3922.67	18	0.030744
8341	3922.72	18	0.0307203
8343	3922.77	18	0.0306698
8345	3922.82	18	0.0307375
8347	3922.87	18	0.0307271
8349	3922.92	18	0.0307492
8351	3922.97	18	0.0307271
8353	3923.02	18	0.0308134
8355	3923.07	18	0.0307965
8357	3923.12	18	0.0307499
8359	3923.17	18	0.0307509
8361	3923.22	18	0.0307597
8363	3923.27	18	0.0307825
8365	3923.32	18	0.0307681
8367	3923.37	18	0.0307375
8369	3923.42	18	0.0307707
8371	3923.47	18	0.030786
8373	3923.52	18	0.0307564
8375	3923.57	18	0.0307411
8377	3923.62	18	0.0307339
8379	3923.67	18	0.0306743
8381	3923.72	18	0.0307678
8383	3923.77	18	0.03066
8385	3923.82	18	0.0307271
8387	3923.87	18	0.0307131
8389	3923.92	18	0.0306782
8391	3923.97	18	0.0307248
8393	3924.02	18	0.0307509
8395	3924.07	18	0.0307808
8397	3924.12	18	0.030759
8399	3924.17	18	0.0307414
8401	3924.22	18	0.0307271
8403	3924.27	18	0.0307375
8405	3924.32	18	0.0307909
8407	3924.37	18	0.0307561
8409	3924.42	18	0.0307551
8411	3924.47	18	0.0307079
8413	3924.52	18	0.0307356
8415	3924.57	18	0.0307229
8417	3924.62	18	0.0306747
8419	3924.67	18	0.0307343
8421	3924.72	18	0.0306756
8423	3924.77	18	0.0307378
8425	3924.82	18	0.030745
8427	3924.87	18	0.0307714
8429	3924.92	18	0.0307665
8431	3924.97	18	0.03076
8433	3925.02	18	0.0306926
8435	3925.07	18	0.0307411
8437	3925.12	18	0.0307714
8439	3925.17	18	0.0307457
8441	3925.22	18	0.0307704
8443	3925.27	18	0.0307512
8445	3925.32	18	0.0307704
8447	3925.37	18	0.0307821
8449	3925.42	18	0.0307639
8451	3925.47	18	0.0307968
8453	3925.52	18	0.0307567
8455	3925.57	18	0.0307548
8457	3925.62	18	0.0307668
8459	3925.67	18	0.0307636
8461	3925.72	18	0.0307896
8463	3925.77	18	0.0307922
8465	3925.82	18	0.0307926
8467	3925.87	18	0.0307307
8469	3925.92	18	0.0307512
8471	3925.97	18	0.030773
8473	3926.02	18	0.0307818
8475	3926.07	18	0.0307509
8477	3926.12	18	0.0307883
8479	3926.17	18	0.0307209
8481	3926.22	18	0.0307522
8483	3926.27	18	0.0307177
8485	3926.32	18	0.03073
8487	3926.37	18	0.0307932
8489	3926.42	18	0.0307531
8491	3926.47	18	0.0307326
8493	3926.52	18	0.0307603
8495	3926.57	18	0.0308222
8497	3926.62	18	0.0307528
8499	3926.67	18	0.0307873
[truncated: 15,150 more rows]

## Sheet: Mouse 1_Event Trials
3.79034e+07	10:31:43.4291840	3880.32	1	2021-12-22T10:31:43.4291840-06:00
3.80938e+07	10:34:53.7566848	4070.62	2	2021-12-22T10:34:53.7566848-06:00
3.82403e+07	10:37:20.3181056	4217.17	3	2021-12-22T10:37:20.3181056-06:00
3.83857e+07	10:39:45.6805376	4362.52	4	2021-12-22T10:39:45.6805376-06:00
3.85573e+07	10:42:37.3461120	4534.17	5	2021-12-22T10:42:37.3461120-06:00

## Sheet: Mouse 2_415
FrameCounter	Timestamp	Flags	Region0G
12940	7800.02	17	0.0235558
12942	7800.07	17	0.023632
12944	7800.12	17	0.0235965
12946	7800.17	17	0.0235799
12948	7800.22	17	0.0236173
12950	7800.27	17	0.023631
12952	7800.32	17	0.0236434
12954	7800.37	17	0.0236769
12956	7800.42	17	0.0236362
12958	7800.47	17	0.0236802
12960	7800.52	17	0.0236844
12962	7800.57	17	0.0236883
12964	7800.62	17	0.0237072
12966	7800.67	17	0.0237001
12968	7800.72	17	0.0236681
12970	7800.77	17	0.0237343
12972	7800.82	17	0.023758
12974	7800.87	17	0.0237173
12976	7800.92	17	0.0237027
12978	7800.97	17	0.0236773
12980	7801.02	17	0.023673
12982	7801.07	17	0.0236935
12984	7801.12	17	0.0236831
12986	7801.17	17	0.0237186
12988	7801.22	17	0.0236971
12990	7801.27	17	0.0236548
12992	7801.32	17	0.0236571
12994	7801.37	17	0.0237056
12996	7801.42	17	0.0236369
12998	7801.47	17	0.0236848
13000	7801.52	17	0.0236948
13002	7801.57	17	0.0236453
13004	7801.62	17	0.0236776
13006	7801.67	17	0.0236541
13008	7801.72	17	0.0236626
13010	7801.77	17	0.0236665
13012	7801.82	17	0.0235936
13014	7801.87	17	0.0235981
13016	7801.92	17	0.0235939
13018	7801.97	17	0.0236274
13020	7802.02	17	0.0236281
13022	7802.07	17	0.0236131
13024	7802.12	17	0.0235776
13026	7802.17	17	0.0236382
13028	7802.22	17	0.023616
13030	7802.27	17	0.0236743
13032	7802.32	17	0.0236948
13034	7802.37	17	0.0236248
13036	7802.42	17	0.0236945
13038	7802.47	17	0.0237779
13040	7802.52	17	0.0237974
13042	7802.57	17	0.023817
13044	7802.62	17	0.0238186
13046	7802.67	17	0.023775
13048	7802.72	17	0.0237932
13050	7802.77	17	0.0237632
13052	7802.82	17	0.0237059
13054	7802.87	17	0.023701
13056	7802.92	17	0.0236903
13058	7802.97	17	0.0237059
13060	7803.02	17	0.023759
13062	7803.07	17	0.0236887
13064	7803.12	17	0.0236183
13066	7803.17	17	0.0236558
13068	7803.22	17	0.0235998
13070	7803.27	17	0.0236014
13072	7803.32	17	0.0236255
13074	7803.37	17	0.023619
13076	7803.42	17	0.0236252
13078	7803.47	17	0.0236072
13080	7803.52	17	0.0236056
13082	7803.57	17	0.0236059
13084	7803.62	17	0.0236209
13086	7803.67	17	0.0236401
13088	7803.72	17	0.0236072
13090	7803.77	17	0.0236496
13092	7803.82	17	0.02363
13094	7803.87	17	0.0236593
13096	7803.92	17	0.0236366
13098	7803.97	17	0.0236261
13100	7804.02	17	0.0236623
13102	7804.07	17	0.0236183
13104	7804.12	17	0.0236593
13106	7804.17	17	0.0236753
13108	7804.22	17	0.0236437
13110	7804.27	17	0.0237189
13112	7804.32	17	0.0236812
13114	7804.37	17	0.0237147
13116	7804.42	17	0.0237316
13118	7804.47	17	0.0237141
13120	7804.52	17	0.023745
13122	7804.57	17	0.0237395
13124	7804.62	17	0.0237206
13126	7804.67	17	0.0237303
13128	7804.72	17	0.0237619
13130	7804.77	17	0.0236903
13132	7804.82	17	0.0237382
13134	7804.87	17	0.0236805
13136	7804.92	17	0.0236763
13138	7804.97	17	0.0237329
13140	7805.02	17	0.023716
13142	7805.07	17	0.0237124
13144	7805.12	17	0.023747
13146	7805.17	17	0.023687
13148	7805.22	17	0.0237447
13150	7805.27	17	0.0237486
13152	7805.32	17	0.0236883
13154	7805.37	17	0.0236893
13156	7805.42	17	0.0236952
13158	7805.47	17	0.0236678
13160	7805.52	17	0.0237163
13162	7805.57	17	0.0237124
13164	7805.62	17	0.0236896
13166	7805.67	17	0.023662
13168	7805.72	17	0.0236958
13170	7805.77	17	0.0237613
13172	7805.82	17	0.0237453
13174	7805.87	17	0.0237447
13176	7805.92	17	0.0237522
13178	7805.97	17	0.023732
13180	7806.02	17	0.023674
13182	7806.07	17	0.0237043
13184	7806.12	17	0.0236313
13186	7806.17	17	0.0236362
13188	7806.22	17	0.023715
13190	7806.27	17	0.0237271
13192	7806.32	17	0.0237408
13194	7806.37	17	0.0237629
13196	7806.42	17	0.0237671
13198	7806.47	17	0.0238349
13200	7806.52	17	0.0237629
13202	7806.57	17	0.0237059
13204	7806.62	17	0.0237069
13206	7806.67	17	0.0237189
13208	7806.72	17	0.0237649
13210	7806.77	17	0.0237626
13212	7806.82	17	0.0237531
13214	7806.87	17	0.023687
13216	7806.92	17	0.0237349
13218	7806.97	17	0.0236675
13220	7807.02	17	0.0236483
13222	7807.07	17	0.0237284
13224	7807.12	17	0.0237258
13226	7807.17	17	0.0237082
13228	7807.22	17	0.0237453
13230	7807.27	17	0.0237515
13232	7807.32	17	0.0237479
13234	7807.37	17	0.0237554
13236	7807.42	17	0.0237447
13238	7807.47	17	0.0237805
13240	7807.52	17	0.0237675
13242	7807.57	17	0.0237851
13244	7807.62	17	0.023828
13246	7807.67	17	0.023843
13248	7807.72	17	0.0238069
13250	7807.77	17	0.0238251
13252	7807.82	17	0.0237951
13254	7807.87	17	0.0238437
13256	7807.92	17	0.0238648
13258	7807.97	17	0.0238085
13260	7808.02	17	0.0237984
13262	7808.07	17	0.0237968
13264	7808.12	17	0.0238075
13266	7808.17	17	0.0238137
13268	7808.22	17	0.0238072
13270	7808.27	17	0.0237395
13272	7808.32	17	0.0237619
13274	7808.37	17	0.0237815
13276	7808.42	17	0.0237235
13278	7808.47	17	0.023747
13280	7808.52	17	0.0237538
13282	7808.57	17	0.0237176
13284	7808.62	17	0.0237004
13286	7808.67	17	0.0237098
13288	7808.72	17	0.0237512
13290	7808.77	17	0.0236942
13292	7808.82	17	0.0237118
13294	7808.87	17	0.0237105
13296	7808.92	17	0.0237424
13298	7808.97	17	0.0236831
13300	7809.02	17	0.0237303
13302	7809.07	17	0.0236756
13304	7809.12	17	0.0237479
13306	7809.17	17	0.023729
13308	7809.22	17	0.0237303
13310	7809.27	17	0.023702
13312	7809.32	17	0.0237483
13314	7809.37	17	0.0237232
13316	7809.42	17	0.0237844
13318	7809.47	17	0.0237642
13320	7809.52	17	0.0237362
13322	7809.57	17	0.0238131
13324	7809.62	17	0.0237499
13326	7809.67	17	0.0237658
13328	7809.72	17	0.023771
13330	7809.77	17	0.0237303
13332	7809.82	17	0.0237737
13334	7809.87	17	0.0237141
13336	7809.92	17	0.0237401
13338	7809.97	17	0.0237281
13340	7810.02	17	0.0237245
13342	7810.07	17	0.0237678
13344	7810.12	17	0.0237854
13346	7810.17	17	0.0237857
13348	7810.22	17	0.0238033
13350	7810.27	17	0.0237398
13352	7810.32	17	0.0237847
13354	7810.37	17	0.0238056
13356	7810.42	17	0.0237694
13358	7810.47	17	0.0237629
13360	7810.52	17	0.0236372
13362	7810.57	17	0.0236287
13364	7810.62	17	0.0237453
13366	7810.67	17	0.0237336
13368	7810.72	17	0.0237209
13370	7810.77	17	0.0236805
13372	7810.82	17	0.0236385
13374	7810.87	17	0.0236981
13376	7810.92	17	0.0237456
13378	7810.97	17	0.0236942
13380	7811.02	17	0.0236994
13382	7811.07	17	0.0237124
13384	7811.12	17	0.0236248
13386	7811.17	17	0.0237212
13388	7811.22	17	0.0237102
13390	7811.27	17	0.0236776
13392	7811.32	17	0.0237421
13394	7811.37	17	0.02373
13396	7811.42	17	0.0236649
13398	7811.47	17	0.0237167
13400	7811.52	17	0.0237072
13402	7811.57	17	0.02366
13404	7811.62	17	0.0236678
13406	7811.67	17	0.0236857
13408	7811.72	17	0.0236607
13410	7811.77	17	0.023703
13412	7811.82	17	0.0236506
13414	7811.87	17	0.0236877
13416	7811.92	17	0.0236942
13418	7811.97	17	0.0236336
13420	7812.02	17	0.0236988
13422	7812.07	17	0.0236971
13424	7812.12	17	0.0236802
13426	7812.17	17	0.0236825
13428	7812.22	17	0.0237326
13430	7812.27	17	0.0237369
13432	7812.32	17	0.0237036
13434	7812.37	17	0.0237496
13436	7812.42	17	0.0237056
13438	7812.47	17	0.0236945
13440	7812.52	17	0.0237258
13442	7812.57	17	0.0237062
13444	7812.62	17	0.0237287
13446	7812.67	17	0.0236818
13448	7812.72	17	0.0237297
13450	7812.77	17	0.0237215
13452	7812.82	17	0.0237362
13454	7812.87	17	0.0237215
13456	7812.92	17	0.0236961
13458	7812.97	17	0.0237365
13460	7813.02	17	0.0237395
13462	7813.07	17	0.0237398
13464	7813.12	17	0.023743
13466	7813.17	17	0.0237496
13468	7813.22	17	0.0237655
13470	7813.27	17	0.0237655
13472	7813.32	17	0.0237176
13474	7813.37	17	0.0237704
13476	7813.42	17	0.0236675
13478	7813.47	17	0.0237222
13480	7813.52	17	0.0237443
13482	7813.57	17	0.0237356
13484	7813.62	17	0.0237561
13486	7813.67	17	0.0236704
13488	7813.72	17	0.0236678
13490	7813.77	17	0.0237255
13492	7813.82	17	0.0236688
13494	7813.87	17	0.0236958
13496	7813.92	17	0.0236587
13498	7813.97	17	0.0237157
13500	7814.02	17	0.0237141
13502	7814.07	17	0.0236988
13504	7814.12	17	0.0237238
13506	7814.17	17	0.0237447
13508	7814.22	17	0.023701
13510	7814.27	17	0.0236919
13512	7814.32	17	0.0237209
13514	7814.37	17	0.0237004
13516	7814.42	17	0.0237417
13518	7814.47	17	0.0237033
13520	7814.52	17	0.0237593
13522	7814.57	17	0.0237753
13524	7814.62	17	0.023689
13526	7814.67	17	0.0237222
13528	7814.72	17	0.0237049
13530	7814.77	17	0.0236929
13532	7814.82	17	0.0237388
13534	7814.87	17	0.0236922
13536	7814.92	17	0.0237004
13538	7814.97	17	0.0236988
13540	7815.02	17	0.0237007
13542	7815.07	17	0.0237408
13544	7815.12	17	0.023731
13546	7815.17	17	0.0237001
13548	7815.22	17	0.0236675
13550	7815.27	17	0.0237147
13552	7815.32	17	0.0237424
13554	7815.37	17	0.0237372
13556	7815.42	17	0.0237447
13558	7815.47	17	0.0237499
13560	7815.52	17	0.0236229
13562	7815.57	17	0.0235831
13564	7815.62	17	0.023605
13566	7815.67	17	0.0236405
13568	7815.72	17	0.0236385
13570	7815.77	17	0.023687
13572	7815.82	17	0.023704
13574	7815.87	17	0.0237343
13576	7815.92	17	0.0236584
13578	7815.97	17	0.0236336
13580	7816.02	17	0.0236219
13582	7816.07	17	0.0236913
13584	7816.12	17	0.0236577
13586	7816.17	17	0.0236079
13588	7816.22	17	0.0235717
13590	7816.27	17	0.0236681
13592	7816.32	17	0.0235971
13594	7816.37	17	0.0236092
13596	7816.42	17	0.0236141
13598	7816.47	17	0.0236219
13600	7816.52	17	0.0236476
13602	7816.57	17	0.0236313
13604	7816.62	17	0.0236541
13606	7816.67	17	0.0236538
13608	7816.72	17	0.0236532
13610	7816.77	17	0.0237027
13612	7816.82	17	0.0236877
13614	7816.87	17	0.0236392
13616	7816.92	17	0.023661
13618	7816.97	17	0.0236506
13620	7817.02	17	0.0237209
13622	7817.07	17	0.0237352
13624	7817.12	17	0.0236857
13626	7817.17	17	0.0237157
13628	7817.22	17	0.023661
13630	7817.27	17	0.0236675
13632	7817.32	17	0.0236685
13634	7817.37	17	0.0236808
13636	7817.42	17	0.0236838
13638	7817.47	17	0.023715
13640	7817.52	17	0.0236893
13642	7817.57	17	0.0236317
13644	7817.62	17	0.0236629
13646	7817.67	17	0.0236258
13648	7817.72	17	0.0236991
13650	7817.77	17	0.023644
13652	7817.82	17	0.0236427
13654	7817.87	17	0.0236802
13656	7817.92	17	0.0236333
13658	7817.97	17	0.0236968
13660	7818.02	17	0.0236831
13662	7818.07	17	0.023645
13664	7818.12	17	0.0236496
13666	7818.17	17	0.0236379
13668	7818.22	17	0.0236743
13670	7818.27	17	0.0236782
13672	7818.32	17	0.0236607
13674	7818.37	17	0.0236261
13676	7818.42	17	0.0236574
13678	7818.47	17	0.0236239
13680	7818.52	17	0.0236571
13682	7818.57	17	0.0236431
13684	7818.62	17	0.0236359
13686	7818.67	17	0.0236268
13688	7818.72	17	0.0236173
13690	7818.77	17	0.0236323
13692	7818.82	17	0.0237134
13694	7818.87	17	0.0236815
13696	7818.92	17	0.0236717
13698	7818.97	17	0.0237248
13700	7819.02	17	0.0236675
13702	7819.07	17	0.0236874
13704	7819.12	17	0.0236743
13706	7819.17	17	0.023672
13708	7819.22	17	0.0236649
13710	7819.27	17	0.0236929
13712	7819.32	17	0.0236909
13714	7819.37	17	0.0237014
13716	7819.42	17	0.0236649
13718	7819.47	17	0.0237248
13720	7819.52	17	0.0236414
13722	7819.57	17	0.023701
13724	7819.62	17	0.023673
13726	7819.67	17	0.0236776
13728	7819.72	17	0.0236913
13730	7819.77	17	0.0237903
13732	7819.82	17	0.0236997
13734	7819.87	17	0.0236851
13736	7819.92	17	0.0236515
13738	7819.97	17	0.023618
13740	7820.02	17	0.0235916
13742	7820.07	17	0.0235646
13744	7820.12	17	0.0235206
13746	7820.17	17	0.023545
13748	7820.22	17	0.0233965
13750	7820.27	17	0.023462
13752	7820.32	17	0.0233715
13754	7820.37	17	0.0233796
13756	7820.42	17	0.0235105
13758	7820.47	17	0.023447
13760	7820.52	17	0.0234161
13762	7820.57	17	0.0233991
13764	7820.62	17	0.023393
13766	7820.67	17	0.0233819
13768	7820.72	17	0.0233975
13770	7820.77	17	0.0234389
13772	7820.82	17	0.0234519
13774	7820.87	17	0.0234281
13776	7820.92	17	0.0233956
13778	7820.97	17	0.023462
13780	7821.02	17	0.0234317
13782	7821.07	17	0.0234063
13784	7821.12	17	0.0234773
13786	7821.17	17	0.0234346
13788	7821.22	17	0.0234666
13790	7821.27	17	0.0234229
13792	7821.32	17	0.0234187
13794	7821.37	17	0.0234174
13796	7821.42	17	0.0234115
13798	7821.47	17	0.0233965
13800	7821.52	17	0.0233946
13802	7821.57	17	0.0234379
13804	7821.62	17	0.0234223
13806	7821.67	17	0.0234187
13808	7821.72	17	0.0234255
13810	7821.77	17	0.0234731
13812	7821.82	17	0.0234646
13814	7821.87	17	0.0234447
13816	7821.92	17	0.023477
13818	7821.97	17	0.0234679
13820	7822.02	17	0.0234379
13822	7822.07	17	0.0234754
13824	7822.12	17	0.0234656
13826	7822.17	17	0.0234636
13828	7822.22	17	0.0234698
13830	7822.27	17	0.0234405
13832	7822.32	17	0.0234646
13834	7822.37	17	0.023434
13836	7822.42	17	0.0234552
13838	7822.47	17	0.0234968
13840	7822.52	17	0.0234929
13842	7822.57	17	0.023489
13844	7822.62	17	0.023447
13846	7822.67	17	0.0234262
13848	7822.72	17	0.0234776
13850	7822.77	17	0.0234451
13852	7822.82	17	0.0234591
13854	7822.87	17	0.0234421
13856	7822.92	17	0.0234793
13858	7822.97	17	0.0234942
13860	7823.02	17	0.0234578
13862	7823.07	17	0.0235112
13864	7823.12	17	0.0234887
13866	7823.17	17	0.0235112
13868	7823.22	17	0.0234815
13870	7823.27	17	0.0235284
13872	7823.32	17	0.0235232
13874	7823.37	17	0.0235232
13876	7823.42	17	0.0235086
13878	7823.47	17	0.0234581
13880	7823.52	17	0.0234995
13882	7823.57	17	0.023462
13884	7823.62	17	0.0235646
13886	7823.67	17	0.0235209
13888	7823.72	17	0.0235118
13890	7823.77	17	0.0234744
13892	7823.82	17	0.0234587
13894	7823.87	17	0.0234949
13896	7823.92	17	0.023462
13898	7823.97	17	0.0234701
13900	7824.02	17	0.0235262
13902	7824.07	17	0.0234754
13904	7824.12	17	0.0234757
13906	7824.17	17	0.0235004
13908	7824.22	17	0.0235633
13910	7824.27	17	0.0235838
13912	7824.32	17	0.023617
13914	7824.37	17	0.0236388
13916	7824.42	17	0.0236294
13918	7824.47	17	0.0236336
13920	7824.52	17	0.0236138
13922	7824.57	17	0.0236401
13924	7824.62	17	0.0235649
13926	7824.67	17	0.0234835
13928	7824.72	17	0.0235349
13930	7824.77	17	0.0234907
13932	7824.82	17	0.0234981
13934	7824.87	17	0.0235688
13936	7824.92	17	0.0235503
13938	7824.97	17	0.0235486
13940	7825.02	17	0.0235486
13942	7825.07	17	0.0234734
13944	7825.12	17	0.0234151
13946	7825.17	17	0.0234767
13948	7825.22	17	0.0234337
13950	7825.27	17	0.023505
13952	7825.32	17	0.0235226
13954	7825.37	17	0.0234539
13956	7825.42	17	0.0234692
13958	7825.47	17	0.0235112
13960	7825.52	17	0.0234571
13962	7825.57	17	0.0234861
13964	7825.62	17	0.0234851
13966	7825.67	17	0.0235138
13968	7825.72	17	0.0234473
13970	7825.77	17	0.0234516
13972	7825.82	17	0.0234936
13974	7825.87	17	0.0234395
13976	7825.92	17	0.0234894
13978	7825.97	17	0.0235079
13980	7826.02	17	0.0235685
13982	7826.07	17	0.0235529
13984	7826.12	17	0.0235519
13986	7826.17	17	0.0235304
13988	7826.22	17	0.0235333
13990	7826.27	17	0.023605
13992	7826.32	17	0.0235887
13994	7826.37	17	0.0235343
13996	7826.42	17	0.023547
13998	7826.47	17	0.023576
14000	7826.52	17	0.0235724
14002	7826.57	17	0.0235613
14004	7826.62	17	0.0235783
14006	7826.67	17	0.0235512
14008	7826.72	17	0.0235822
14010	7826.77	17	0.0235747
14012	7826.82	17	0.0235695
14014	7826.87	17	0.0236082
14016	7826.92	17	0.0235962
14018	7826.97	17	0.0236222
14020	7827.02	17	0.0236424
14022	7827.07	17	0.0236453
14024	7827.12	17	0.023619
14026	7827.17	17	0.0236896
14028	7827.22	17	0.0236844
14030	7827.27	17	0.0236799
14032	7827.32	17	0.0236502
14034	7827.37	17	0.0236339
14036	7827.42	17	0.0236297
14038	7827.47	17	0.0236574
14040	7827.52	17	0.0236437
14042	7827.57	17	0.0236734
14044	7827.62	17	0.0236795
14046	7827.67	17	0.0235717
14048	7827.72	17	0.0236691
14050	7827.77	17	0.0236177
14052	7827.82	17	0.0236457
14054	7827.87	17	0.0236463
14056	7827.92	17	0.0235994
14058	7827.97	17	0.0236756
14060	7828.02	17	0.0236248
14062	7828.07	17	0.023602
14064	7828.12	17	0.0236154
14066	7828.17	17	0.0235968
14068	7828.22	17	0.0236147
14070	7828.27	17	0.0236414
14072	7828.32	17	0.023588
14074	7828.37	17	0.0236496
14076	7828.42	17	0.0236424
14078	7828.47	17	0.0236274
14080	7828.52	17	0.0236212
14082	7828.57	17	0.0236232
14084	7828.62	17	0.0236098
14086	7828.67	17	0.0236112
14088	7828.72	17	0.0235581
14090	7828.77	17	0.0235753
14092	7828.82	17	0.0235711
14094	7828.87	17	0.023548
14096	7828.92	17	0.0236007
14098	7828.97	17	0.0235991
14100	7829.02	17	0.02359
14102	7829.07	17	0.0235831
14104	7829.12	17	0.0235639
14106	7829.17	17	0.0235669
14108	7829.22	17	0.0235685
14110	7829.27	17	0.0235617
14112	7829.32	17	0.0235584
14114	7829.37	17	0.0235304
14116	7829.42	17	0.0235704
14118	7829.47	17	0.0235275
14120	7829.52	17	0.0235196
14122	7829.57	17	0.0235662
14124	7829.62	17	0.0235571
14126	7829.67	17	0.0235584
14128	7829.72	17	0.0235945
14130	7829.77	17	0.0235727
14132	7829.82	17	0.0235968
14134	7829.87	17	0.0235538
14136	7829.92	17	0.0236043
14138	7829.97	17	0.02366
14140	7830.02	17	0.0236343
14142	7830.07	17	0.0236997
14144	7830.12	17	0.0236043
14146	7830.17	17	0.0235392
14148	7830.22	17	0.0235473
14150	7830.27	17	0.023533
14152	7830.32	17	0.0235128
14154	7830.37	17	0.0234509
14156	7830.42	17	0.0234278
14158	7830.47	17	0.0233923
14160	7830.52	17	0.0234366
14162	7830.57	17	0.0234079
14164	7830.62	17	0.0233545
14166	7830.67	17	0.0233786
14168	7830.72	17	0.0233962
14170	7830.77	17	0.0233024
14172	7830.82	17	0.0234027
14174	7830.87	17	0.0233985
14176	7830.92	17	0.0233737
14178	7830.97	17	0.0234574
14180	7831.02	17	0.0233356
14182	7831.07	17	0.0233685
14184	7831.12	17	0.0233864
14186	7831.17	17	0.0233568
14188	7831.22	17	0.0233685
14190	7831.27	17	0.0233913
14192	7831.32	17	0.0233265
14194	7831.37	17	0.0233376
14196	7831.42	17	0.0234011
14198	7831.47	17	0.0233021
14200	7831.52	17	0.0232669
14202	7831.57	17	0.0232914
14204	7831.62	17	0.023294
14206	7831.67	17	0.023292
14208	7831.72	17	0.023308
14210	7831.77	17	0.0232578
14212	7831.82	17	0.0233122
14214	7831.87	17	0.0232953
14216	7831.92	17	0.0233024
14218	7831.97	17	0.023321
14220	7832.02	17	0.0232891
14222	7832.07	17	0.0232998
14224	7832.12	17	0.0232689
14226	7832.17	17	0.0232744
14228	7832.22	17	0.0232731
14230	7832.27	17	0.0232881
14232	7832.32	17	0.0232637
14234	7832.37	17	0.023249
14236	7832.42	17	0.0233363
14238	7832.47	17	0.0232715
14240	7832.52	17	0.0232669
14242	7832.57	17	0.023291
14244	7832.62	17	0.0232884
14246	7832.67	17	0.023291
14248	7832.72	17	0.0233282
14250	7832.77	17	0.0232718
14252	7832.82	17	0.0233148
14254	7832.87	17	0.0233308
14256	7832.92	17	0.0232975
14258	7832.97	17	0.0233145
14260	7833.02	17	0.0233223
14262	7833.07	17	0.023306
14264	7833.12	17	0.0233239
14266	7833.17	17	0.0233402
14268	7833.22	17	0.0233298
14270	7833.27	17	0.0233197
14272	7833.32	17	0.0233461
14274	7833.37	17	0.0233503
14276	7833.42	17	0.0233171
14278	7833.47	17	0.0234024
14280	7833.52	17	0.023432
14282	7833.57	17	0.023336
14284	7833.62	17	0.0233878
14286	7833.67	17	0.0233151
14288	7833.72	17	0.0234005
14290	7833.77	17	0.0234034
14292	7833.82	17	0.0234125
14294	7833.87	17	0.0234122
14296	7833.92	17	0.0234076
14298	7833.97	17	0.0233904
14300	7834.02	17	0.0233653
14302	7834.07	17	0.023322
14304	7834.12	17	0.0233623
14306	7834.17	17	0.0232813
14308	7834.22	17	0.0233353
14310	7834.27	17	0.0233536
14312	7834.32	17	0.0233236
14314	7834.37	17	0.0233194
14316	7834.42	17	0.0233356
14318	7834.47	17	0.02325
14320	7834.52	17	0.0233086
14322	7834.57	17	0.0232744
14324	7834.62	17	0.0232803
14326	7834.67	17	0.0232738
14328	7834.72	17	0.0233089
14330	7834.77	17	0.0232546
14332	7834.82	17	0.0233044
14334	7834.87	17	0.0233197
14336	7834.92	17	0.0233431
14338	7834.97	17	0.0233158
14340	7835.02	17	0.0233334
14342	7835.07	17	0.0233151
14344	7835.12	17	0.0233389
14346	7835.17	17	0.0233203
14348	7835.22	17	0.0233083
14350	7835.27	17	0.0233099
14352	7835.32	17	0.0233392
14354	7835.37	17	0.0233347
14356	7835.42	17	0.0233627
14358	7835.47	17	0.0233412
14360	7835.52	17	0.0233858
14362	7835.57	17	0.0233998
14364	7835.62	17	0.0233728
14366	7835.67	17	0.0233796
14368	7835.72	17	0.0233708
14370	7835.77	17	0.0233555
14372	7835.82	17	0.023362
14374	7835.87	17	0.0233842
14376	7835.92	17	0.0233496
14378	7835.97	17	0.0234018
14380	7836.02	17	0.0234451
14382	7836.07	17	0.0234141
14384	7836.12	17	0.0234526
14386	7836.17	17	0.0233812
14388	7836.22	17	0.0234034
14390	7836.27	17	0.0234141
14392	7836.32	17	0.0233715
14394	7836.37	17	0.0234975
14396	7836.42	17	0.0234412
14398	7836.47	17	0.0233819
14400	7836.52	17	0.0234451
14402	7836.57	17	0.0234304
14404	7836.62	17	0.0234079
14406	7836.67	17	0.0233614
14408	7836.72	17	0.0234063
14410	7836.77	17	0.0234213
14412	7836.82	17	0.0233858
14414	7836.87	17	0.0233457
14416	7836.92	17	0.0233444
14418	7836.97	17	0.0234226
14420	7837.02	17	0.0233926
14422	7837.07	17	0.0233418
14424	7837.12	17	0.0233744
14426	7837.17	17	0.0233096
14428	7837.22	17	0.0233438
14430	7837.27	17	0.0233705
14432	7837.32	17	0.0233409
14434	7837.37	17	0.0233545
14436	7837.42	17	0.023294
14438	7837.47	17	0.0233571
14440	7837.52	17	0.0233314
14442	7837.57	17	0.0233207
14444	7837.62	17	0.0233457
14446	7837.67	17	0.0232982
14448	7837.72	17	0.023319
14450	7837.77	17	0.0233177
14452	7837.82	17	0.0232471
14454	7837.87	17	0.0233142
14456	7837.92	17	0.023291
14458	7837.97	17	0.0233467
14460	7838.02	17	0.0233239
14462	7838.07	17	0.0233089
14464	7838.12	17	0.0233415
14466	7838.17	17	0.0233347
14468	7838.22	17	0.0233076
14470	7838.27	17	0.0233125
14472	7838.32	17	0.0233024
14474	7838.37	17	0.0232783
14476	7838.42	17	0.0233591
14478	7838.47	17	0.0233402
14480	7838.52	17	0.0233383
14482	7838.57	17	0.0233308
14484	7838.62	17	0.0233106
14486	7838.67	17	0.0233197
14488	7838.72	17	0.0233392
14490	7838.77	17	0.0233278
14492	7838.82	17	0.0233851
14494	7838.87	17	0.0233383
14496	7838.92	17	0.0233415
14498	7838.97	17	0.0233965
14500	7839.02	17	0.0234731
14502	7839.07	17	0.0234695
14504	7839.12	17	0.0235372
14506	7839.17	17	0.0235024
14508	7839.22	17	0.0234929
14510	7839.27	17	0.0235249
14512	7839.32	17	0.0235542
14514	7839.37	17	0.0235678
14516	7839.42	17	0.0235532
14518	7839.47	17	0.0235376
14520	7839.52	17	0.0235213
14522	7839.57	17	0.0234698
14524	7839.62	17	0.0234535
14526	7839.67	17	0.0233959
14528	7839.72	17	0.0234177
14530	7839.77	17	0.0233578
14532	7839.82	17	0.0234307
14534	7839.87	17	0.0234467
14536	7839.92	17	0.0233956
14538	7839.97	17	0.0234399
14540	7840.02	17	0.0233392
14542	7840.07	17	0.0233552
14544	7840.12	17	0.0233555
14546	7840.17	17	0.0233024
14548	7840.22	17	0.0233643
14550	7840.27	17	0.0233832
14552	7840.32	17	0.0233435
14554	7840.37	17	0.0233705
14556	7840.42	17	0.0233483
14558	7840.47	17	0.0233555
14560	7840.52	17	0.0233428
14562	7840.57	17	0.0233816
14564	7840.62	17	0.0233422
14566	7840.67	17	0.0233835
14568	7840.72	17	0.0233627
14570	7840.77	17	0.0233708
14572	7840.82	17	0.0234503
14574	7840.87	17	0.0234011
14576	7840.92	17	0.0234373
14578	7840.97	17	0.0234467
14580	7841.02	17	0.0233386
14582	7841.07	17	0.0234246
14584	7841.12	17	0.0234246
14586	7841.17	17	0.0234066
14588	7841.22	17	0.0234213
14590	7841.27	17	0.0235421
14592	7841.32	17	0.0234206
14594	7841.37	17	0.0234105
14596	7841.42	17	0.0234503
14598	7841.47	17	0.0233659
14600	7841.52	17	0.0233897
14602	7841.57	17	0.0233796
14604	7841.62	17	0.0233969
14606	7841.67	17	0.0233545
14608	7841.72	17	0.0233298
14610	7841.77	17	0.0233363
14612	7841.82	17	0.023362
14614	7841.87	17	0.0233604
14616	7841.92	17	0.0233086
14618	7841.97	17	0.023322
14620	7842.02	17	0.0232979
14622	7842.07	17	0.0232761
14624	7842.12	17	0.0232689
14626	7842.17	17	0.0232793
14628	7842.22	17	0.0232506
14630	7842.27	17	0.0232992
14632	7842.32	17	0.0232985
14634	7842.37	17	0.0233099
14636	7842.42	17	0.0232705
14638	7842.47	17	0.0232451
14640	7842.52	17	0.0232907
14642	7842.57	17	0.023377
14644	7842.62	17	0.0233523
14646	7842.67	17	0.0233614
14648	7842.72	17	0.0233464
14650	7842.77	17	0.0233216
14652	7842.82	17	0.0233975
14654	7842.87	17	0.0234399
14656	7842.92	17	0.0234884
14658	7842.97	17	0.0235043
14660	7843.02	17	0.023464
14662	7843.07	17	0.0233825
14664	7843.12	17	0.0234177
14666	7843.17	17	0.02339
14668	7843.22	17	0.0233952
14670	7843.27	17	0.02339
14672	7843.32	17	0.0234083
14674	7843.37	17	0.0234099
14676	7843.42	17	0.0234252
14678	7843.47	17	0.0233894
14680	7843.52	17	0.0233741
14682	7843.57	17	0.0234141
14684	7843.62	17	0.0233711
14686	7843.67	17	0.0234005
14688	7843.72	17	0.0233982
14690	7843.77	17	0.0233881
14692	7843.82	17	0.0233995
14694	7843.87	17	0.0233917
14696	7843.92	17	0.0233838
14698	7843.97	17	0.023447
14700	7844.02	17	0.0234164
14702	7844.07	17	0.0234301
14704	7844.12	17	0.0234415
14706	7844.17	17	0.0234239
14708	7844.22	17	0.0234571
14710	7844.27	17	0.0233998
14712	7844.32	17	0.0234219
14714	7844.37	17	0.0234255
14716	7844.42	17	0.0234483
14718	7844.47	17	0.023461
14720	7844.52	17	0.0234486
14722	7844.57	17	0.0234096
14724	7844.62	17	0.0234535
14726	7844.67	17	0.0234392
14728	7844.72	17	0.0233985
14730	7844.77	17	0.02339
14732	7844.82	17	0.02345
14734	7844.87	17	0.0234467
14736	7844.92	17	0.0234285
14738	7844.97	17	0.0234542
14740	7845.02	17	0.0234151
14742	7845.07	17	0.0234242
14744	7845.12	17	0.0233734
14746	7845.17	17	0.0234216
14748	7845.22	17	0.023391
14750	7845.27	17	0.0233558
14752	7845.32	17	0.0234001
14754	7845.37	17	0.0233991
14756	7845.42	17	0.023333
14758	7845.47	17	0.0233939
14760	7845.52	17	0.0234008
14762	7845.57	17	0.0233923
14764	7845.62	17	0.0234558
14766	7845.67	17	0.0233851
14768	7845.72	17	0.0233705
14770	7845.77	17	0.0234203
14772	7845.82	17	0.0234197
14774	7845.87	17	0.0234874
14776	7845.92	17	0.0234412
14778	7845.97	17	0.0234278
14780	7846.02	17	0.0234102
14782	7846.07	17	0.0234219
14784	7846.12	17	0.0234246
14786	7846.17	17	0.0234024
14788	7846.22	17	0.0234627
14790	7846.27	17	0.0234086
14792	7846.32	17	0.0234268
14794	7846.37	17	0.023278
14796	7846.42	17	0.0233617
14798	7846.47	17	0.0232855
14800	7846.52	17	0.0232744
14802	7846.57	17	0.0233291
14804	7846.62	17	0.0233575
14806	7846.67	17	0.0233135
14808	7846.72	17	0.0233226
14810	7846.77	17	0.0233708
14812	7846.82	17	0.0233174
14814	7846.87	17	0.0233698
14816	7846.92	17	0.023365
14818	7846.97	17	0.0233728
14820	7847.02	17	0.0233523
14822	7847.07	17	0.0233252
14824	7847.12	17	0.0233389
14826	7847.17	17	0.0233402
14828	7847.22	17	0.0233897
14830	7847.27	17	0.023418
14832	7847.32	17	0.0233894
14834	7847.37	17	0.0233806
14836	7847.42	17	0.0234229
14838	7847.47	17	0.0233959
14840	7847.52	17	0.0234021
14842	7847.57	17	0.0234203
14844	7847.62	17	0.0234109
14846	7847.67	17	0.0234122
14848	7847.72	17	0.0234307
14850	7847.77	17	0.0234317
14852	7847.82	17	0.0234705
14854	7847.87	17	0.0235095
14856	7847.92	17	0.0234021
14858	7847.97	17	0.0235128
14860	7848.02	17	0.0234744
14862	7848.07	17	0.0234757
14864	7848.12	17	0.0235076
14866	7848.17	17	0.0235004
14868	7848.22	17	0.0234272
14870	7848.27	17	0.023462
14872	7848.32	17	0.0234581
14874	7848.37	17	0.0234353
14876	7848.42	17	0.0234988
14878	7848.47	17	0.0234105
14880	7848.52	17	0.0234213
14882	7848.57	17	0.0234519
14884	7848.62	17	0.0233461
14886	7848.67	17	0.0234473
14888	7848.72	17	0.023404
14890	7848.77	17	0.0233858
14892	7848.82	17	0.0234027
14894	7848.87	17	0.0233588
14896	7848.92	17	0.0233956
14898	7848.97	17	0.0234096
14900	7849.02	17	0.0234011
14902	7849.07	17	0.0233949
14904	7849.12	17	0.0234405
14906	7849.17	17	0.0234105
14908	7849.22	17	0.0234395
14910	7849.27	17	0.0234314
14912	7849.32	17	0.0234275
14914	7849.37	17	0.0234079
14916	7849.42	17	0.0234138
14918	7849.47	17	0.0234252
14920	7849.52	17	0.0234151
14922	7849.57	17	0.0233845
14924	7849.62	17	0.0233597
14926	7849.67	17	0.0234076
14928	7849.72	17	0.0233816
14930	7849.77	17	0.0234337
14932	7849.82	17	0.0233549
14934	7849.87	17	0.0233897
14936	7849.92	17	0.0234529
14938	7849.97	17	0.0234379
14940	7850.02	17	0.0234236
14942	7850.07	17	0.0234044
14944	7850.12	17	0.0234568
14946	7850.17	17	0.023478
14948	7850.22	17	0.0234356
14950	7850.27	17	0.0234486
14952	7850.32	17	0.0234473
14954	7850.37	17	0.0233926
14956	7850.42	17	0.0234333
14958	7850.47	17	0.0234467
14960	7850.52	17	0.0234486
14962	7850.57	17	0.0234578
14964	7850.62	17	0.023432
14966	7850.67	17	0.0234259
14968	7850.72	17	0.0233913
14970	7850.77	17	0.023432
14972	7850.82	17	0.0234653
14974	7850.87	17	0.0234522
14976	7850.92	17	0.0234467
14978	7850.97	17	0.0234496
14980	7851.02	17	0.0234294
14982	7851.07	17	0.0234548
14984	7851.12	17	0.0234809
14986	7851.17	17	0.023421
14988	7851.22	17	0.0234281
14990	7851.27	17	0.023405
14992	7851.32	17	0.0234044
14994	7851.37	17	0.0234265
14996	7851.42	17	0.0233825
14998	7851.47	17	0.0234167
15000	7851.52	17	0.023433
15002	7851.57	17	0.0234141
15004	7851.62	17	0.0234086
15006	7851.67	17	0.0234086
15008	7851.72	17	0.023391
15010	7851.77	17	0.023448
15012	7851.82	17	0.0233519
15014	7851.87	17	0.0233659
15016	7851.92	17	0.0234008
15018	7851.97	17	0.0233819
15020	7852.02	17	0.0234174
15022	7852.07	17	0.0234509
15024	7852.12	17	0.023463
15026	7852.17	17	0.0234115
15028	7852.22	17	0.0234229
15030	7852.27	17	0.023349
15032	7852.32	17	0.0232897
15034	7852.37	17	0.0232966
15036	7852.42	17	0.02332
15038	7852.47	17	0.0233037
15040	7852.52	17	0.0233187
15042	7852.57	17	0.0233115
15044	7852.62	17	0.0233161
15046	7852.67	17	0.023379
15048	7852.72	17	0.0233588
15050	7852.77	17	0.0233659
15052	7852.82	17	0.0233181
15054	7852.87	17	0.0233265
15056	7852.92	17	0.0233229
15058	7852.97	17	0.0233321
15060	7853.02	17	0.0233278
15062	7853.07	17	0.0233106
15064	7853.12	17	0.0233041
15066	7853.17	17	0.023362
15068	7853.22	17	0.0233444
15070	7853.27	17	0.0233575
15072	7853.32	17	0.0234079
15074	7853.37	17	0.023365
15076	7853.42	17	0.0233848
15078	7853.47	17	0.023379
15080	7853.52	17	0.0233591
15082	7853.57	17	0.0233597
15084	7853.62	17	0.0233985
15086	7853.67	17	0.0233715
15088	7853.72	17	0.0233988
15090	7853.77	17	0.0234607
15092	7853.82	17	0.0233438
15094	7853.87	17	0.0233773
15096	7853.92	17	0.0234063
15098	7853.97	17	0.023405
15100	7854.02	17	0.0234014
15102	7854.07	17	0.0233949
15104	7854.12	17	0.0233656
15106	7854.17	17	0.0234415
15108	7854.22	17	0.0234024
15110	7854.27	17	0.02342
15112	7854.32	17	0.0234467
15114	7854.37	17	0.0233754
15116	7854.42	17	0.0234115
15118	7854.47	17	0.0234369
15120	7854.52	17	0.0233858
15122	7854.57	17	0.023447
15124	7854.62	17	0.0233431
15126	7854.67	17	0.0233698
15128	7854.72	17	0.0234229
15130	7854.77	17	0.0234027
15132	7854.82	17	0.0234206
15134	7854.87	17	0.0234363
15136	7854.92	17	0.0233422
15138	7854.97	17	0.023348
15140	7855.02	17	0.0233995
15142	7855.07	17	0.0233545
15144	7855.12	17	0.0233812
15146	7855.17	17	0.0233545
15148	7855.22	17	0.0233386
15150	7855.27	17	0.0234151
15152	7855.32	17	0.023407
15154	7855.37	17	0.0233747
15156	7855.42	17	0.0233848
15158	7855.47	17	0.0233637
15160	7855.52	17	0.0233799
15162	7855.57	17	0.0233698
15164	7855.62	17	0.0234252
15166	7855.67	17	0.0234148
15168	7855.72	17	0.0233679
15170	7855.77	17	0.023391
15172	7855.82	17	0.0233744
15174	7855.87	17	0.0233702
15176	7855.92	17	0.0233633
15178	7855.97	17	0.023378
15180	7856.02	17	0.0233669
15182	7856.07	17	0.0233663
15184	7856.12	17	0.0233324
15186	7856.17	17	0.0233656
15188	7856.22	17	0.0233907
15190	7856.27	17	0.0233571
15192	7856.32	17	0.0233545
15194	7856.37	17	0.023377
15196	7856.42	17	0.0233174
15198	7856.47	17	0.0233946
15200	7856.52	17	0.0233457
15202	7856.57	17	0.0233575
15204	7856.62	17	0.0233737
15206	7856.67	17	0.0232809
15208	7856.72	17	0.0233347
15210	7856.77	17	0.0233588
15212	7856.82	17	0.0233601
15214	7856.87	17	0.0233637
15216	7856.92	17	0.0233145
15218	7856.97	17	0.0233285
15220	7857.02	17	0.0234021
15222	7857.07	17	0.0233503
15224	7857.12	17	0.023347
15226	7857.17	17	0.0233425
15228	7857.22	17	0.0233698
15230	7857.27	17	0.0233975
15232	7857.32	17	0.0233363
15234	7857.37	17	0.0233444
15236	7857.42	17	0.0233617
15238	7857.47	17	0.0233389
15240	7857.52	17	0.0233516
15242	7857.57	17	0.0233347
15244	7857.62	17	0.0233777
15246	7857.67	17	0.0234392
15248	7857.72	17	0.0233848
15250	7857.77	17	0.0233777
15252	7857.82	17	0.0234096
15254	7857.87	17	0.0233851
15256	7857.92	17	0.0233487
15258	7857.97	17	0.0234285
15260	7858.02	17	0.0232881
15262	7858.07	17	0.0233672
15264	7858.12	17	0.023277
15266	7858.17	17	0.0233236
15268	7858.22	17	0.0233011
15270	7858.27	17	0.0233112
15272	7858.32	17	0.0233571
15274	7858.37	17	0.0233356
15276	7858.42	17	0.0233308
15278	7858.47	17	0.0233503
15280	7858.52	17	0.0233373
15282	7858.57	17	0.0233663
15284	7858.62	17	0.0233793
15286	7858.67	17	0.0233653
15288	7858.72	17	0.0233213
15290	7858.77	17	0.0233568
15292	7858.82	17	0.0233549
15294	7858.87	17	0.0233943
15296	7858.92	17	0.0233643
15298	7858.97	17	0.0234118
15300	7859.02	17	0.0233933
15302	7859.07	17	0.0233409
15304	7859.12	17	0.0233851
15306	7859.17	17	0.0233988
15308	7859.22	17	0.0234102
15310	7859.27	17	0.0233884
15312	7859.32	17	0.023351
15314	7859.37	17	0.0234122
15316	7859.42	17	0.0233523
15318	7859.47	17	0.0232611
15320	7859.52	17	0.0232692
15322	7859.57	17	0.0232747
15324	7859.62	17	0.0232181
15326	7859.67	17	0.0231429
15328	7859.72	17	0.0232093
15330	7859.77	17	0.023066
15332	7859.82	17	0.0232624
15334	7859.87	17	0.0231692
15336	7859.92	17	0.0231966
15338	7859.97	17	0.0231878
15340	7860.02	17	0.0231194
15342	7860.07	17	0.0231722
15344	7860.12	17	0.0231683
15346	7860.17	17	0.0231686
15348	7860.22	17	0.0231035
15350	7860.27	17	0.023137
15352	7860.32	17	0.0231018
15354	7860.37	17	0.0230973
15356	7860.42	17	0.0231223
15358	7860.47	17	0.0230934
15360	7860.52	17	0.0231461
15362	7860.57	17	0.0231341
15364	7860.62	17	0.0231748
15366	7860.67	17	0.0231937
15368	7860.72	17	0.0231419
15370	7860.77	17	0.0232181
15372	7860.82	17	0.0231771
15374	7860.87	17	0.0231354
15376	7860.92	17	0.0231048
15378	7860.97	17	0.0231279
15380	7861.02	17	0.0230816
15382	7861.07	17	0.0231305
15384	7861.12	17	0.0230894
15386	7861.17	17	0.0230829
15388	7861.22	17	0.0231194
15390	7861.27	17	0.023123
15392	7861.32	17	0.0230803
15394	7861.37	17	0.0231406
15396	7861.42	17	0.0231572
15398	7861.47	17	0.0230657
15400	7861.52	17	0.0231214
15402	7861.57	17	0.0231145
15404	7861.62	17	0.0231595
15406	7861.67	17	0.023137
15408	7861.72	17	0.0231819
15410	7861.77	17	0.0231256
15412	7861.82	17	0.023163
15414	7861.87	17	0.0231741
15416	7861.92	17	0.0232011
15418	7861.97	17	0.0231839
15420	7862.02	17	0.0231771
15422	7862.07	17	0.0232217
15424	7862.12	17	0.0231979
15426	7862.17	17	0.0232073
15428	7862.22	17	0.0232327
15430	7862.27	17	0.0232064
15432	7862.32	17	0.023236
15434	7862.37	17	0.0232637
15436	7862.42	17	0.0232578
15438	7862.47	17	0.0232796
15440	7862.52	17	0.0232598
15442	7862.57	17	0.0232399
15444	7862.62	17	0.023252
15446	7862.67	17	0.0232647
15448	7862.72	17	0.0232044
15450	7862.77	17	0.0232311
15452	7862.82	17	0.0231927
15454	7862.87	17	0.0232855
15456	7862.92	17	0.0232546
15458	7862.97	17	0.0232975
15460	7863.02	17	0.0232692
15462	7863.07	17	0.0232533
15464	7863.12	17	0.0232617
15466	7863.17	17	0.0232813
15468	7863.22	17	0.0232572
15470	7863.27	17	0.0233197
15472	7863.32	17	0.0232852
15474	7863.37	17	0.0232438
15476	7863.42	17	0.0233122
15478	7863.47	17	0.0232695
15480	7863.52	17	0.0232572
15482	7863.57	17	0.0232353
15484	7863.62	17	0.0232624
15486	7863.67	17	0.0232025
15488	7863.72	17	0.0232279
15490	7863.77	17	0.0232298
15492	7863.82	17	0.0232213
15494	7863.87	17	0.0231933
15496	7863.92	17	0.0232099
15498	7863.97	17	0.0232451
15500	7864.02	17	0.023209
15502	7864.07	17	0.0232487
15504	7864.12	17	0.0232399
15506	7864.17	17	0.023195
15508	7864.22	17	0.0233676
15510	7864.27	17	0.0234011
15512	7864.32	17	0.0233708
15514	7864.37	17	0.0234076
15516	7864.42	17	0.0234548
15518	7864.47	17	0.0234386
15520	7864.52	17	0.0234151
15522	7864.57	17	0.0233676
15524	7864.62	17	0.0233568
15526	7864.67	17	0.0232747
15528	7864.72	17	0.0231634
15530	7864.77	17	0.0232093
15532	7864.82	17	0.0231959
15534	7864.87	17	0.023221
15536	7864.92	17	0.0231937
15538	7864.97	17	0.0232314
15540	7865.02	17	0.0231878
15542	7865.07	17	0.023251
15544	7865.12	17	0.0232243
15546	7865.17	17	0.0232125
15548	7865.22	17	0.0232376
15550	7865.27	17	0.023151
15552	7865.32	17	0.0231875
15554	7865.37	17	0.0232565
15556	7865.42	17	0.0231871
15558	7865.47	17	0.0231067
15560	7865.52	17	0.0231562
15562	7865.57	17	0.0231217
15564	7865.62	17	0.0231145
15566	7865.67	17	0.0231279
15568	7865.72	17	0.0231028
15570	7865.77	17	0.02311
15572	7865.82	17	0.0230963
15574	7865.87	17	0.0230471
15576	7865.92	17	0.0231012
15578	7865.97	17	0.0230126
15580	7866.02	17	0.0230386
15582	7866.07	17	0.0231201
15584	7866.12	17	0.0230803
15586	7866.17	17	0.0230484
15588	7866.22	17	0.0230621
15590	7866.27	17	0.023068
15592	7866.32	17	0.0230517
15594	7866.37	17	0.0231269
15596	7866.42	17	0.0231175
15598	7866.47	17	0.0230712
15600	7866.52	17	0.0231064
15602	7866.57	17	0.0231083
15604	7866.62	17	0.0230566
15606	7866.67	17	0.0231002
15608	7866.72	17	0.0230774
15610	7866.77	17	0.0231061
15612	7866.82	17	0.0231543
15614	7866.87	17	0.023137
15616	7866.92	17	0.0231119
15618	7866.97	17	0.0231513
15620	7867.02	17	0.0231178
15622	7867.07	17	0.0231191
15624	7867.12	17	0.0231464
15626	7867.17	17	0.0231246
15628	7867.22	17	0.0231419
15630	7867.27	17	0.023094
15632	7867.32	17	0.0231334
15634	7867.37	17	0.0231318
15636	7867.42	17	0.0231344
15638	7867.47	17	0.023122
15640	7867.52	17	0.0231399
15642	7867.57	17	0.023165
15644	7867.62	17	0.0231852
15646	7867.67	17	0.0231774
15648	7867.72	17	0.0231715
15650	7867.77	17	0.0231924
15652	7867.82	17	0.0231992
15654	7867.87	17	0.0231657
15656	7867.92	17	0.0231569
15658	7867.97	17	0.0231989
15660	7868.02	17	0.0231175
15662	7868.07	17	0.0231044
15664	7868.12	17	0.0231243
15666	7868.17	17	0.0231533
15668	7868.22	17	0.0231552
15670	7868.27	17	0.0232031
15672	7868.32	17	0.0231184
15674	7868.37	17	0.0231963
15676	7868.42	17	0.0232594
15678	7868.47	17	0.0231572
15680	7868.52	17	0.0231995
15682	7868.57	17	0.0232047
15684	7868.62	17	0.0231904
15686	7868.67	17	0.0231917
15688	7868.72	17	0.023179
15690	7868.77	17	0.0232064
15692	7868.82	17	0.0232106
15694	7868.87	17	0.0231777
15696	7868.92	17	0.0232073
15698	7868.97	17	0.0232217
15700	7869.02	17	0.0231855
15702	7869.07	17	0.0231692
15704	7869.12	17	0.0232171
15706	7869.17	17	0.0231175
15708	7869.22	17	0.0231696
15710	7869.27	17	0.023152
15712	7869.32	17	0.023164
15714	7869.37	17	0.023151
15716	7869.42	17	0.0231924
15718	7869.47	17	0.0231858
15720	7869.52	17	0.0231409
15722	7869.57	17	0.0231236
15724	7869.62	17	0.0231383
15726	7869.67	17	0.023138
15728	7869.72	17	0.0231637
15730	7869.77	17	0.0232161
15732	7869.82	17	0.0230956
15734	7869.87	17	0.0231526
15736	7869.92	17	0.0231477
15738	7869.97	17	0.0230914
15740	7870.02	17	0.0232015
15742	7870.07	17	0.0231406
15744	7870.12	17	0.0231432
15746	7870.17	17	0.023165
15748	7870.22	17	0.0231302
15750	7870.27	17	0.0231477
15752	7870.32	17	0.0231455
15754	7870.37	17	0.0230953
15756	7870.42	17	0.0231396
15758	7870.47	17	0.0231109
15760	7870.52	17	0.0231298
15762	7870.57	17	0.023109
15764	7870.62	17	0.0231135
15766	7870.67	17	0.0231692
15768	7870.72	17	0.0231223
15770	7870.77	17	0.0231256
15772	7870.82	17	0.0231341
15774	7870.87	17	0.0231116
15776	7870.92	17	0.0231074
15778	7870.97	17	0.0231376
15780	7871.02	17	0.023108
15782	7871.07	17	0.0231093
15784	7871.12	17	0.0231087
15786	7871.17	17	0.0231067
15788	7871.22	17	0.0231155
15790	7871.27	17	0.0230947
15792	7871.32	17	0.0230771
15794	7871.37	17	0.0230533
15796	7871.42	17	0.0230605
15798	7871.47	17	0.0230735
15800	7871.52	17	0.0230621
15802	7871.57	17	0.0230715
15804	7871.62	17	0.0230709
15806	7871.67	17	0.0230618
15808	7871.72	17	0.0230784
15810	7871.77	17	0.0231051
15812	7871.82	17	0.0230513
15814	7871.87	17	0.0230504
15816	7871.92	17	0.0230719
15818	7871.97	17	0.0230693
15820	7872.02	17	0.0230891
15822	7872.07	17	0.0230579
15824	7872.12	17	0.0230826
15826	7872.17	17	0.0230536
15828	7872.22	17	0.0230979
15830	7872.27	17	0.0231158
15832	7872.32	17	0.023082
15834	7872.37	17	0.0230611
15836	7872.42	17	0.0231087
15838	7872.47	17	0.0231064
15840	7872.52	17	0.0231018
15842	7872.57	17	0.0230826
15844	7872.62	17	0.0230979
15846	7872.67	17	0.0231204
15848	7872.72	17	0.0231148
15850	7872.77	17	0.0231035
15852	7872.82	17	0.0230924
15854	7872.87	17	0.0231337
15856	7872.92	17	0.0231204
15858	7872.97	17	0.0231468
15860	7873.02	17	0.0231875
15862	7873.07	17	0.0231705
15864	7873.12	17	0.0232067
15866	7873.17	17	0.023208
15868	7873.22	17	0.023153
15870	7873.27	17	0.0231738
15872	7873.32	17	0.023179
15874	7873.37	17	0.0231634
15876	7873.42	17	0.0231383
15878	7873.47	17	0.0231197
15880	7873.52	17	0.0231474
15882	7873.57	17	0.0231272
15884	7873.62	17	0.0231507
15886	7873.67	17	0.0231585
15888	7873.72	17	0.0230745
15890	7873.77	17	0.0231074
15892	7873.82	17	0.0231181
15894	7873.87	17	0.0230764
15896	7873.92	17	0.023024
15898	7873.97	17	0.0230761
15900	7874.02	17	0.0230846
15902	7874.07	17	0.0230207
15904	7874.12	17	0.0230816
15906	7874.17	17	0.0230738
15908	7874.22	17	0.0230224
15910	7874.27	17	0.0231191
15912	7874.32	17	0.023064
15914	7874.37	17	0.0230663
15916	7874.42	17	0.0230999
15918	7874.47	17	0.0230719
15920	7874.52	17	0.0230934
15922	7874.57	17	0.0231188
15924	7874.62	17	0.0230976
15926	7874.67	17	0.0230868
15928	7874.72	17	0.0231122
15930	7874.77	17	0.0231139
15932	7874.82	17	0.0231148
15934	7874.87	17	0.0230986
15936	7874.92	17	0.0231256
15938	7874.97	17	0.0231416
15940	7875.02	17	0.0231093
15942	7875.07	17	0.0231256
15944	7875.12	17	0.0231787
15946	7875.17	17	0.0231888
15948	7875.22	17	0.0232477
15950	7875.27	17	0.0232165
15952	7875.32	17	0.0232757
15954	7875.37	17	0.0232718
15956	7875.42	17	0.0232728
15958	7875.47	17	0.0232699
15960	7875.52	17	0.0232536
15962	7875.57	17	0.0232308
15964	7875.62	17	0.0232767
15966	7875.67	17	0.0232731
15968	7875.72	17	0.0232454
15970	7875.77	17	0.0232279
15972	7875.82	17	0.023292
15974	7875.87	17	0.023179
15976	7875.92	17	0.0232243
15978	7875.97	17	0.0232223
15980	7876.02	17	0.0231487
15982	7876.07	17	0.0231438
15984	7876.12	17	0.0231337
15986	7876.17	17	0.0231416
15988	7876.22	17	0.0231552
15990	7876.27	17	0.0231311
15992	7876.32	17	0.0231468
15994	7876.37	17	0.0231604
15996	7876.42	17	0.0231184
15998	7876.47	17	0.023135
16000	7876.52	17	0.0231315
16002	7876.57	17	0.0231168
16004	7876.62	17	0.023138
16006	7876.67	17	0.0231396
16008	7876.72	17	0.0231298
16010	7876.77	17	0.02315
16012	7876.82	17	0.0232161
16014	7876.87	17	0.0231731
16016	7876.92	17	0.0231696
16018	7876.97	17	0.0231503
16020	7877.02	17	0.0231468
16022	7877.07	17	0.0231302
16024	7877.12	17	0.023167
16026	7877.17	17	0.0231774
16028	7877.22	17	0.0231477
16030	7877.27	17	0.0231842
16032	7877.32	17	0.0231324
16034	7877.37	17	0.0232044
16036	7877.42	17	0.0232086
16038	7877.47	17	0.0232145
16040	7877.52	17	0.0231891
16042	7877.57	17	0.0232389
16044	7877.62	17	0.0231738
16046	7877.67	17	0.0231399
16048	7877.72	17	0.0231308
16050	7877.77	17	0.0231526
16052	7877.82	17	0.0231751
16054	7877.87	17	0.0231516
16056	7877.92	17	0.0231256
16058	7877.97	17	0.0231168
16060	7878.02	17	0.0231858
16062	7878.07	17	0.0231083
16064	7878.12	17	0.0231536
16066	7878.17	17	0.023135
16068	7878.22	17	0.0231442
16070	7878.27	17	0.0231305
16072	7878.32	17	0.0231458
16074	7878.37	17	0.0231536
16076	7878.42	17	0.0232038
16078	7878.47	17	0.0232767
16080	7878.52	17	0.0232184
16082	7878.57	17	0.0232008
16084	7878.62	17	0.0231468
16086	7878.67	17	0.0231741
16088	7878.72	17	0.0232598
16090	7878.77	17	0.0232223
16092	7878.82	17	0.0231819
16094	7878.87	17	0.0231689
16096	7878.92	17	0.023163
16098	7878.97	17	0.0231331
16100	7879.02	17	0.0231008
16102	7879.07	17	0.0230878
16104	7879.12	17	0.0230852
16106	7879.17	17	0.0230543
16108	7879.22	17	0.023023
16110	7879.27	17	0.0229895
16112	7879.32	17	0.0229947
16114	7879.37	17	0.0229335
16116	7879.42	17	0.0229657
16118	7879.47	17	0.0229185
16120	7879.52	17	0.0228996
16122	7879.57	17	0.0229048
16124	7879.62	17	0.0228742
16126	7879.67	17	0.0228374
16128	7879.72	17	0.0228068
16130	7879.77	17	0.022839
16132	7879.82	17	0.0228237
16134	7879.87	17	0.0228306
16136	7879.92	17	0.0228963
16138	7879.97	17	0.022884
16140	7880.02	17	0.0228319
16142	7880.07	17	0.0228638
16144	7880.12	17	0.0227794
16146	7880.17	17	0.0228035
16148	7880.22	17	0.0227895
16150	7880.27	17	0.0228781
16152	7880.32	17	0.0228941
16154	7880.37	17	0.0229553
16156	7880.42	17	0.022954
16158	7880.47	17	0.0230526
16160	7880.52	17	0.0230699
16162	7880.57	17	0.0230914
16164	7880.62	17	0.0231484
16166	7880.67	17	0.0231308
16168	7880.72	17	0.0231021
16170	7880.77	17	0.0231044
16172	7880.82	17	0.0230559
16174	7880.87	17	0.0230585
16176	7880.92	17	0.0230373
16178	7880.97	17	0.0231178
16180	7881.02	17	0.0231051
16182	7881.07	17	0.0230888
16184	7881.12	17	0.0231982
16186	7881.17	17	0.0232116
16188	7881.22	17	0.0231839
16190	7881.27	17	0.0232197
16192	7881.32	17	0.0231731
16194	7881.37	17	0.0231184
16196	7881.42	17	0.0231617
16198	7881.47	17	0.023108
16200	7881.52	17	0.0231663
16202	7881.57	17	0.0230696
16204	7881.62	17	0.0230647
16206	7881.67	17	0.0230937
16208	7881.72	17	0.023066
16210	7881.77	17	0.0230204
16212	7881.82	17	0.0229859
16214	7881.87	17	0.0230116
16216	7881.92	17	0.0229817
16218	7881.97	17	0.0229817
16220	7882.02	17	0.0230413
16222	7882.07	17	0.0230178
16224	7882.12	17	0.0230152
16226	7882.17	17	0.0229875
16228	7882.22	17	0.0230474
16230	7882.27	17	0.0230536
16232	7882.32	17	0.0230461
16234	7882.37	17	0.0229963
16236	7882.42	17	0.0230807
16238	7882.47	17	0.023082
16240	7882.52	17	0.0229514
16242	7882.57	17	0.0230989
16244	7882.62	17	0.022911
16246	7882.67	17	0.022767
16248	7882.72	17	0.0230162
16250	7882.77	17	0.0231266
16252	7882.82	17	0.0231569
16254	7882.87	17	0.0231165
16256	7882.92	17	0.0230719
16258	7882.97	17	0.0230696
16260	7883.02	17	0.0230276
16262	7883.07	17	0.0227951
16264	7883.12	17	0.0229032
16266	7883.17	17	0.0230686
16268	7883.22	17	0.0229318
16270	7883.27	17	0.022882
16272	7883.32	17	0.0229178
16274	7883.37	17	0.0229488
16276	7883.42	17	0.0228973
16278	7883.47	17	0.0228901
16280	7883.52	17	0.0229865
16282	7883.57	17	0.0230595
16284	7883.62	17	0.0229895
16286	7883.67	17	0.0227804
16288	7883.72	17	0.0227964
16290	7883.77	17	0.022926
16292	7883.82	17	0.022854
16294	7883.87	17	0.0227097
16296	7883.92	17	0.0227283
16298	7883.97	17	0.0227433
16300	7884.02	17	0.022502
16302	7884.07	17	0.0227762
16304	7884.12	17	0.0227869
16306	7884.17	17	0.0227618
16308	7884.22	17	0.0227306
16310	7884.27	17	0.0227039
16312	7884.32	17	0.0227804
16314	7884.37	17	0.0227556
16316	7884.42	17	0.0226361
16318	7884.47	17	0.0225726
16320	7884.52	17	0.0226358
16322	7884.57	17	0.0226804
16324	7884.62	17	0.0226824
16326	7884.67	17	0.0226479
16328	7884.72	17	0.022557
16330	7884.77	17	0.0226381
16332	7884.82	17	0.0227045
16334	7884.87	17	0.0226374
16336	7884.92	17	0.022544
16338	7884.97	17	0.0226514
16340	7885.02	17	0.0226453
16342	7885.07	17	0.0225427
16344	7885.12	17	0.0226746
16346	7885.17	17	0.022643
16348	7885.22	17	0.0226654
16350	7885.27	17	0.0226576
16352	7885.32	17	0.0226469
16354	7885.37	17	0.022598
16356	7885.42	17	0.0226661
16358	7885.47	17	0.0226254
16360	7885.52	17	0.0225788
16362	7885.57	17	0.0226505
16364	7885.62	17	0.0226293
16366	7885.67	17	0.0226065
16368	7885.72	17	0.0226951
16370	7885.77	17	0.0226319
16372	7885.82	17	0.0227009
16374	7885.87	17	0.0226049
16376	7885.92	17	0.0226094
16378	7885.97	17	0.02264
16380	7886.02	17	0.022656
16382	7886.07	17	0.0226593
16384	7886.12	17	0.0226482
16386	7886.17	17	0.0226466
16388	7886.22	17	0.022642
16390	7886.27	17	0.022753
16392	7886.32	17	0.0226944
16394	7886.37	17	0.0227276
16396	7886.42	17	0.0227403
16398	7886.47	17	0.0227488
16400	7886.52	17	0.0227361
16402	7886.57	17	0.0227061
16404	7886.62	17	0.0227276
16406	7886.67	17	0.0227618
16408	7886.72	17	0.0227693
16410	7886.77	17	0.0227641
16412	7886.82	17	0.0227784
16414	7886.87	17	0.0227915
16416	7886.92	17	0.0227824
16418	7886.97	17	0.0227951
16420	7887.02	17	0.0227986
16422	7887.07	17	0.0227941
16424	7887.12	17	0.0228478
16426	7887.17	17	0.0228227
16428	7887.22	17	0.0228325
16430	7887.27	17	0.0228143
16432	7887.32	17	0.0227794
16434	7887.37	17	0.0228208
16436	7887.42	17	0.0228804
16438	7887.47	17	0.0228709
16440	7887.52	17	0.0228696
16442	7887.57	17	0.0229559
16444	7887.62	17	0.0229041
16446	7887.67	17	0.0229172
16448	7887.72	17	0.0229084
16450	7887.77	17	0.0228941
16452	7887.82	17	0.0229068
16454	7887.87	17	0.0230041
16456	7887.92	17	0.0229976
16458	7887.97	17	0.0229996
16460	7888.02	17	0.0230002
16462	7888.07	17	0.0229641
16464	7888.12	17	0.0229745
16466	7888.17	17	0.022938
16468	7888.22	17	0.0229624
16470	7888.27	17	0.0229445
16472	7888.32	17	0.0229234
16474	7888.37	17	0.0230025
16476	7888.42	17	0.0230031
16478	7888.47	17	0.0229572
16480	7888.52	17	0.0229663
16482	7888.57	17	0.0230191
16484	7888.62	17	0.022954
16486	7888.67	17	0.0230458
16488	7888.72	17	0.0229986
16490	7888.77	17	0.0229745
16492	7888.82	17	0.0230517
16494	7888.87	17	0.0230364
16496	7888.92	17	0.0230129
16498	7888.97	17	0.0230683
16500	7889.02	17	0.023024
16502	7889.07	17	0.023011
16504	7889.12	17	0.0229979
16506	7889.17	17	0.0230461
16508	7889.22	17	0.0229957
16510	7889.27	17	0.0230266
16512	7889.32	17	0.022965
16514	7889.37	17	0.0230018
16516	7889.42	17	0.0230253
16518	7889.47	17	0.0230276
16520	7889.52	17	0.0230937
16522	7889.57	17	0.023064
16524	7889.62	17	0.0230116
16526	7889.67	17	0.0230549
16528	7889.72	17	0.0230452
16530	7889.77	17	0.0230455
16532	7889.82	17	0.0230693
16534	7889.87	17	0.023066
16536	7889.92	17	0.0230702
16538	7889.97	17	0.023036
16540	7890.02	17	0.0230523
16542	7890.07	17	0.0230455
16544	7890.12	17	0.0230429
16546	7890.17	17	0.0230693
16548	7890.22	17	0.02301
16550	7890.27	17	0.0230761
16552	7890.32	17	0.0230934
16554	7890.37	17	0.0230813
16556	7890.42	17	0.02305
16558	7890.47	17	0.0230885
16560	7890.52	17	0.0230797
16562	7890.57	17	0.0229947
16564	7890.62	17	0.0230207
16566	7890.67	17	0.0229621
16568	7890.72	17	0.022995
16570	7890.77	17	0.0230126
16572	7890.82	17	0.022967
16574	7890.87	17	0.0229869
16576	7890.92	17	0.022981
16578	7890.97	17	0.0229931
16580	7891.02	17	0.0230608
16582	7891.07	17	0.022982
16584	7891.12	17	0.0229468
16586	7891.17	17	0.022952
16588	7891.22	17	0.0228856
16590	7891.27	17	0.0229182
16592	7891.32	17	0.0229579
16594	7891.37	17	0.0229357
16596	7891.42	17	0.0229377
16598	7891.47	17	0.0229087
16600	7891.52	17	0.0229527
16602	7891.57	17	0.0229175
16604	7891.62	17	0.022938
16606	7891.67	17	0.0229269
16608	7891.72	17	0.0229878
16610	7891.77	17	0.0229755
16612	7891.82	17	0.0229677
16614	7891.87	17	0.0229514
16616	7891.92	17	0.0229263
16618	7891.97	17	0.0229507
16620	7892.02	17	0.022898
16622	7892.07	17	0.0229624
16624	7892.12	17	0.0229794
16626	7892.17	17	0.0229507
16628	7892.22	17	0.02305
16630	7892.27	17	0.0230334
16632	7892.32	17	0.0230074
16634	7892.37	17	0.0229924
16636	7892.42	17	0.022939
16638	7892.47	17	0.0229423
16640	7892.52	17	0.0229299
16642	7892.57	17	0.0229266
16644	7892.62	17	0.0229481
16646	7892.67	17	0.0229735
16648	7892.72	17	0.02291
16650	7892.77	17	0.0228892
16652	7892.82	17	0.022898
16654	7892.87	17	0.0228774
16656	7892.92	17	0.0229331
16658	7892.97	17	0.0229201
16660	7893.02	17	0.0229367
16662	7893.07	17	0.0229432
16664	7893.12	17	0.0229432
16666	7893.17	17	0.0229895
16668	7893.22	17	0.0229563
16670	7893.27	17	0.0229546
16672	7893.32	17	0.0229068
16674	7893.37	17	0.0228895
16676	7893.42	17	0.0229133
16678	7893.47	17	0.0229155
16680	7893.52	17	0.0228846
16682	7893.57	17	0.0229748
16684	7893.62	17	0.0229449
16686	7893.67	17	0.0230067
16688	7893.72	17	0.0230145
16690	7893.77	17	0.0229904
16692	7893.82	17	0.0229494
16694	7893.87	17	0.0229367
16696	7893.92	17	0.0229621
16698	7893.97	17	0.0229921
16700	7894.02	17	0.0229742
16702	7894.07	17	0.0229361
16704	7894.12	17	0.0229383
16706	7894.17	17	0.0229637
16708	7894.22	17	0.0229426
16710	7894.27	17	0.0229517
16712	7894.32	17	0.0229677
16714	7894.37	17	0.0229475
16716	7894.42	17	0.022955
16718	7894.47	17	0.0229139
16720	7894.52	17	0.0229354
16722	7894.57	17	0.0229725
16724	7894.62	17	0.0229563
16726	7894.67	17	0.022937
16728	7894.72	17	0.0229826
16730	7894.77	17	0.0229423
16732	7894.82	17	0.0229983
16734	7894.87	17	0.0229777
16736	7894.92	17	0.0229465
16738	7894.97	17	0.0229162
16740	7895.02	17	0.0230012
16742	7895.07	17	0.0229598
16744	7895.12	17	0.0230351
16746	7895.17	17	0.0230855
16748	7895.22	17	0.0230178
16750	7895.27	17	0.0230351
16752	7895.32	17	0.0230328
16754	7895.37	17	0.022953
16756	7895.42	17	0.0229989
16758	7895.47	17	0.0230025
16760	7895.52	17	0.0230002
16762	7895.57	17	0.0230295
16764	7895.62	17	0.0230253
16766	7895.67	17	0.0230204
16768	7895.72	17	0.0229771
16770	7895.77	17	0.022994
16772	7895.82	17	0.0229729
16774	7895.87	17	0.0229006
16776	7895.92	17	0.0229159
16778	7895.97	17	0.0229146
16780	7896.02	17	0.0229409
16782	7896.07	17	0.0229494
16784	7896.12	17	0.0229921
16786	7896.17	17	0.0229155
16788	7896.22	17	0.0229331
16790	7896.27	17	0.022923
16792	7896.32	17	0.0228849
16794	7896.37	17	0.0229247
16796	7896.42	17	0.0228791
16798	7896.47	17	0.0228862
16800	7896.52	17	0.0229175
16802	7896.57	17	0.022882
16804	7896.62	17	0.0229683
16806	7896.67	17	0.0229175
16808	7896.72	17	0.0229243
16810	7896.77	17	0.0229725
16812	7896.82	17	0.0229403
16814	7896.87	17	0.0229116
16816	7896.92	17	0.022997
16818	7896.97	17	0.0229598
16820	7897.02	17	0.0229742
16822	7897.07	17	0.0230045
16824	7897.12	17	0.0229735
16826	7897.17	17	0.0229875
16828	7897.22	17	0.0230194
16830	7897.27	17	0.0230025
16832	7897.32	17	0.0230178
16834	7897.37	17	0.0230582
16836	7897.42	17	0.0230132
16838	7897.47	17	0.0231002
16840	7897.52	17	0.0230982
16842	7897.57	17	0.0230885
16844	7897.62	17	0.0231188
16846	7897.67	17	0.0231383
16848	7897.72	17	0.0230852
16850	7897.77	17	0.0230966
16852	7897.82	17	0.0231438
16854	7897.87	17	0.0231015
16856	7897.92	17	0.0230908
16858	7897.97	17	0.023094
16860	7898.02	17	0.0231249
16862	7898.07	17	0.0230478
16864	7898.12	17	0.0230852
16866	7898.17	17	0.023095
16868	7898.22	17	0.0231109
16870	7898.27	17	0.0230878
16872	7898.32	17	0.0230953
16874	7898.37	17	0.0231051
16876	7898.42	17	0.0230533
16878	7898.47	17	0.023053
16880	7898.52	17	0.0230963
16882	7898.57	17	0.0230627
16884	7898.62	17	0.0230953
16886	7898.67	17	0.0230282
16888	7898.72	17	0.0230575
16890	7898.77	17	0.0230484
16892	7898.82	17	0.0230794
16894	7898.87	17	0.0230439
16896	7898.92	17	0.0230211
16898	7898.97	17	0.0230859
16900	7899.02	17	0.0230058
16902	7899.07	17	0.023052
16904	7899.12	17	0.0230465
16906	7899.17	17	0.0230878
16908	7899.22	17	0.0230686
16910	7899.27	17	0.0231096
16912	7899.32	17	0.0230732
16914	7899.37	17	0.0230878
16916	7899.42	17	0.0230885
16918	7899.47	17	0.02308
16920	7899.52	17	0.0230784
16922	7899.57	17	0.0230471
16924	7899.62	17	0.0230328
16926	7899.67	17	0.0230709
16928	7899.72	17	0.0230494
16930	7899.77	17	0.0230816
16932	7899.82	17	0.0230637
16934	7899.87	17	0.0230608
16936	7899.92	17	0.0230647
[truncated: 15,001 more rows]

## Sheet: Mouse 2_470
FrameCounter	Timestamp	Flags	Region0G
12941	7800.05	18	0.024155
12943	7800.1	18	0.0240853
12945	7800.15	18	0.0240921
12947	7800.2	18	0.0240462
12949	7800.25	18	0.0240788
12951	7800.3	18	0.0241143
12953	7800.35	18	0.0240589
12955	7800.4	18	0.0241312
12957	7800.45	18	0.0241351
12959	7800.5	18	0.0241348
12961	7800.55	18	0.024168
12963	7800.6	18	0.0241364
12965	7800.65	18	0.0240957
12967	7800.7	18	0.0241276
12969	7800.75	18	0.0241257
12971	7800.8	18	0.024125
12973	7800.85	18	0.0241306
12975	7800.9	18	0.0240573
12977	7800.95	18	0.0240713
12979	7801	18	0.0241123
12981	7801.05	18	0.0240863
12983	7801.1	18	0.0241332
12985	7801.15	18	0.0240834
12987	7801.2	18	0.0241335
12989	7801.25	18	0.0241837
12991	7801.3	18	0.0241599
12993	7801.35	18	0.0241889
12995	7801.4	18	0.0241791
12997	7801.45	18	0.0242638
12999	7801.5	18	0.0242875
13001	7801.55	18	0.024311
13003	7801.6	18	0.0242888
13005	7801.65	18	0.0242918
13007	7801.7	18	0.0242631
13009	7801.75	18	0.0242426
13011	7801.8	18	0.0242634
13013	7801.85	18	0.0242569
13015	7801.9	18	0.0242328
13017	7801.95	18	0.0242354
13019	7802	18	0.0242494
13021	7802.05	18	0.0242547
13023	7802.1	18	0.0242924
13025	7802.15	18	0.0242823
13027	7802.2	18	0.0242589
13029	7802.25	18	0.0243325
13031	7802.3	18	0.0242895
13033	7802.35	18	0.0243221
13035	7802.4	18	0.0243631
13037	7802.45	18	0.0245425
13039	7802.5	18	0.024634
13041	7802.55	18	0.0247129
13043	7802.6	18	0.0246881
13045	7802.65	18	0.0247653
13047	7802.7	18	0.0248151
13049	7802.75	18	0.0247545
13051	7802.8	18	0.0247366
13053	7802.85	18	0.0246656
13055	7802.9	18	0.0246875
13057	7802.95	18	0.024778
13059	7803	18	0.0246767
13061	7803.05	18	0.0246526
13063	7803.1	18	0.0246441
13065	7803.15	18	0.0245777
13067	7803.2	18	0.024579
13069	7803.25	18	0.0245663
13071	7803.3	18	0.0245823
13073	7803.35	18	0.0246187
13075	7803.4	18	0.0245911
13077	7803.45	18	0.024622
13079	7803.5	18	0.0246148
13081	7803.55	18	0.0246129
13083	7803.6	18	0.0246347
13085	7803.65	18	0.0245904
13087	7803.7	18	0.0245403
13089	7803.75	18	0.0245546
13091	7803.8	18	0.0245409
13093	7803.85	18	0.0245236
13095	7803.9	18	0.0244992
13097	7803.95	18	0.0245435
13099	7804	18	0.0244722
13101	7804.05	18	0.0244647
13103	7804.1	18	0.0244627
13105	7804.15	18	0.0244553
13107	7804.2	18	0.0244764
13109	7804.25	18	0.0244487
13111	7804.3	18	0.0244634
13113	7804.35	18	0.024424
13115	7804.4	18	0.0244145
13117	7804.45	18	0.0244673
13119	7804.5	18	0.0244644
13121	7804.55	18	0.024436
13123	7804.6	18	0.0244777
13125	7804.65	18	0.0244745
13127	7804.7	18	0.0244106
13129	7804.75	18	0.0244302
13131	7804.8	18	0.0244767
13133	7804.85	18	0.024468
13135	7804.9	18	0.0244826
13137	7804.95	18	0.024466
13139	7805	18	0.0244872
13141	7805.05	18	0.02444
13143	7805.1	18	0.0244201
13145	7805.15	18	0.0244885
13147	7805.2	18	0.0245233
13149	7805.25	18	0.0245256
13151	7805.3	18	0.0244999
13153	7805.35	18	0.0244934
13155	7805.4	18	0.0245262
13157	7805.45	18	0.0245064
13159	7805.5	18	0.0244777
13161	7805.55	18	0.0243999
13163	7805.6	18	0.0244126
13165	7805.65	18	0.0244702
13167	7805.7	18	0.0244422
13169	7805.75	18	0.0245093
13171	7805.8	18	0.0246142
13173	7805.85	18	0.0246995
13175	7805.9	18	0.0247809
13177	7805.95	18	0.0247396
13179	7806	18	0.0247171
13181	7806.05	18	0.0246966
13183	7806.1	18	0.0245686
13185	7806.15	18	0.0245569
13187	7806.2	18	0.0245517
13189	7806.25	18	0.024651
13191	7806.3	18	0.0246454
13193	7806.35	18	0.0246598
13195	7806.4	18	0.0247242
13197	7806.45	18	0.0247343
13199	7806.5	18	0.0246738
13201	7806.55	18	0.0246279
13203	7806.6	18	0.0246275
13205	7806.65	18	0.0245865
13207	7806.7	18	0.0246493
13209	7806.75	18	0.0246044
13211	7806.8	18	0.0245289
13213	7806.85	18	0.0245725
13215	7806.9	18	0.0245797
13217	7806.95	18	0.0244917
13219	7807	18	0.024553
13221	7807.05	18	0.0244676
13223	7807.1	18	0.0244481
13225	7807.15	18	0.0244582
13227	7807.2	18	0.0244106
13229	7807.25	18	0.0243576
13231	7807.3	18	0.0243182
13233	7807.35	18	0.0243175
13235	7807.4	18	0.0243452
13237	7807.45	18	0.0243182
13239	7807.5	18	0.0243292
13241	7807.55	18	0.0242797
13243	7807.6	18	0.0242729
13245	7807.65	18	0.0242872
13247	7807.7	18	0.0242846
13249	7807.75	18	0.0242823
13251	7807.8	18	0.0242846
13253	7807.85	18	0.0243048
13255	7807.9	18	0.024295
13257	7807.95	18	0.0243256
13259	7808	18	0.0243393
13261	7808.05	18	0.0243247
13263	7808.1	18	0.0243905
13265	7808.15	18	0.0243699
13267	7808.2	18	0.0243276
13269	7808.25	18	0.0243637
13271	7808.3	18	0.0243139
13273	7808.35	18	0.024309
13275	7808.4	18	0.0243605
13277	7808.45	18	0.0243439
13279	7808.5	18	0.0243032
13281	7808.55	18	0.024325
13283	7808.6	18	0.0242784
13285	7808.65	18	0.0242201
13287	7808.7	18	0.0242527
13289	7808.75	18	0.0242195
13291	7808.8	18	0.0242358
13293	7808.85	18	0.02421
13295	7808.9	18	0.0241999
13297	7808.95	18	0.0242573
13299	7809	18	0.0242185
13301	7809.05	18	0.0241846
13303	7809.1	18	0.0242074
13305	7809.15	18	0.0242306
13307	7809.2	18	0.0241895
13309	7809.25	18	0.0241631
13311	7809.3	18	0.0241872
13313	7809.35	18	0.0242328
13315	7809.4	18	0.0241811
13317	7809.45	18	0.0241482
13319	7809.5	18	0.0241719
13321	7809.55	18	0.0241426
13323	7809.6	18	0.0241866
13325	7809.65	18	0.0242104
13327	7809.7	18	0.0241928
13329	7809.75	18	0.0241797
13331	7809.8	18	0.0241788
13333	7809.85	18	0.024141
13335	7809.9	18	0.0241439
13337	7809.95	18	0.0240996
13339	7810	18	0.0241062
13341	7810.05	18	0.0241195
13343	7810.1	18	0.0240941
13345	7810.15	18	0.0241198
13347	7810.2	18	0.024127
13349	7810.25	18	0.0241205
13351	7810.3	18	0.024157
13353	7810.35	18	0.0241664
13355	7810.4	18	0.0243058
13357	7810.45	18	0.0243771
13359	7810.5	18	0.0243364
13361	7810.55	18	0.0243195
13363	7810.6	18	0.0244829
13365	7810.65	18	0.0246005
13367	7810.7	18	0.0244947
13369	7810.75	18	0.0244351
13371	7810.8	18	0.0244839
13373	7810.85	18	0.0244966
13375	7810.9	18	0.0244833
13377	7810.95	18	0.0245549
13379	7811	18	0.0245696
13381	7811.05	18	0.0244953
13383	7811.1	18	0.0244536
13385	7811.15	18	0.0244846
13387	7811.2	18	0.0245181
13389	7811.25	18	0.0245598
13391	7811.3	18	0.0245797
13393	7811.35	18	0.0245533
13395	7811.4	18	0.0244862
13397	7811.45	18	0.0245223
13399	7811.5	18	0.0245149
13401	7811.55	18	0.0244999
13403	7811.6	18	0.0244351
13405	7811.65	18	0.0244767
13407	7811.7	18	0.0245096
13409	7811.75	18	0.0244325
13411	7811.8	18	0.0244198
13413	7811.85	18	0.024524
13415	7811.9	18	0.0244201
13417	7811.95	18	0.0243878
13419	7812	18	0.0243751
13421	7812.05	18	0.0243494
13423	7812.1	18	0.0243761
13425	7812.15	18	0.0243468
13427	7812.2	18	0.0242836
13429	7812.25	18	0.0242761
13431	7812.3	18	0.0243478
13433	7812.35	18	0.0242501
13435	7812.4	18	0.0242882
13437	7812.45	18	0.024253
13439	7812.5	18	0.0242644
13441	7812.55	18	0.0241882
13443	7812.6	18	0.0241866
13445	7812.65	18	0.0241931
13447	7812.7	18	0.0242504
13449	7812.75	18	0.0241801
13451	7812.8	18	0.0242328
13453	7812.85	18	0.0242866
13455	7812.9	18	0.0242924
13457	7812.95	18	0.0243263
13459	7813	18	0.0243035
13461	7813.05	18	0.0242872
13463	7813.1	18	0.0243344
13465	7813.15	18	0.0243279
13467	7813.2	18	0.0243348
13469	7813.25	18	0.0243755
13471	7813.3	18	0.0244129
13473	7813.35	18	0.0243396
13475	7813.4	18	0.0243729
13477	7813.45	18	0.0243888
13479	7813.5	18	0.0243865
13481	7813.55	18	0.0243488
13483	7813.6	18	0.0242306
13485	7813.65	18	0.0243116
13487	7813.7	18	0.0243169
13489	7813.75	18	0.0242465
13491	7813.8	18	0.0242778
13493	7813.85	18	0.0243064
13495	7813.9	18	0.0243393
13497	7813.95	18	0.0243061
13499	7814	18	0.0243608
13501	7814.05	18	0.0243315
13503	7814.1	18	0.0243996
13505	7814.15	18	0.0243266
13507	7814.2	18	0.0242928
13509	7814.25	18	0.0243579
13511	7814.3	18	0.0243501
13513	7814.35	18	0.0243211
13515	7814.4	18	0.0242472
13517	7814.45	18	0.0242693
13519	7814.5	18	0.0242905
13521	7814.55	18	0.0242872
13523	7814.6	18	0.024309
13525	7814.65	18	0.0242094
13527	7814.7	18	0.0242384
13529	7814.75	18	0.0242556
13531	7814.8	18	0.02421
13533	7814.85	18	0.0241999
13535	7814.9	18	0.0243208
13537	7814.95	18	0.0243442
13539	7815	18	0.0243748
13541	7815.05	18	0.0243849
13543	7815.1	18	0.0243484
13545	7815.15	18	0.0243276
13547	7815.2	18	0.0243019
13549	7815.25	18	0.0242582
13551	7815.3	18	0.0243475
13553	7815.35	18	0.0243364
13555	7815.4	18	0.0243833
13557	7815.45	18	0.0244859
13559	7815.5	18	0.0245087
13561	7815.55	18	0.0244201
13563	7815.6	18	0.0244712
13565	7815.65	18	0.0244953
13567	7815.7	18	0.0245429
13569	7815.75	18	0.0245598
13571	7815.8	18	0.024565
13573	7815.85	18	0.0245771
13575	7815.9	18	0.0245676
13577	7815.95	18	0.0245438
13579	7816	18	0.0245565
13581	7816.05	18	0.0245699
13583	7816.1	18	0.0244885
13585	7816.15	18	0.0245276
13587	7816.2	18	0.0244448
13589	7816.25	18	0.0244504
13591	7816.3	18	0.0244373
13593	7816.35	18	0.0244162
13595	7816.4	18	0.0243481
13597	7816.45	18	0.0243719
13599	7816.5	18	0.0244119
13601	7816.55	18	0.024365
13603	7816.6	18	0.0243129
13605	7816.65	18	0.0243191
13607	7816.7	18	0.0243061
13609	7816.75	18	0.0242289
13611	7816.8	18	0.0242908
13613	7816.85	18	0.0242491
13615	7816.9	18	0.024253
13617	7816.95	18	0.0242393
13619	7817	18	0.024238
13621	7817.05	18	0.02421
13623	7817.1	18	0.0242618
13625	7817.15	18	0.0242657
13627	7817.2	18	0.0242569
13629	7817.25	18	0.0242393
13631	7817.3	18	0.0242325
13633	7817.35	18	0.0242716
13635	7817.4	18	0.0242761
13637	7817.45	18	0.0242504
13639	7817.5	18	0.0242853
13641	7817.55	18	0.0242866
13643	7817.6	18	0.0243348
13645	7817.65	18	0.0243602
13647	7817.7	18	0.0243188
13649	7817.75	18	0.0243328
13651	7817.8	18	0.0243178
13653	7817.85	18	0.0242807
13655	7817.9	18	0.0243126
13657	7817.95	18	0.0243185
13659	7818	18	0.0243048
13661	7818.05	18	0.0243169
13663	7818.1	18	0.0243471
13665	7818.15	18	0.0243015
13667	7818.2	18	0.0243471
13669	7818.25	18	0.0243901
13671	7818.3	18	0.0243677
13673	7818.35	18	0.0244237
13675	7818.4	18	0.0244243
13677	7818.45	18	0.0243856
13679	7818.5	18	0.0243804
13681	7818.55	18	0.0243621
13683	7818.6	18	0.02444
13685	7818.65	18	0.0244299
13687	7818.7	18	0.0243839
13689	7818.75	18	0.0244973
13691	7818.8	18	0.0245269
13693	7818.85	18	0.0245445
13695	7818.9	18	0.0245526
13697	7818.95	18	0.0245067
13699	7819	18	0.0245057
13701	7819.05	18	0.0244276
13703	7819.1	18	0.0244015
13705	7819.15	18	0.0244175
13707	7819.2	18	0.0243517
13709	7819.25	18	0.0244308
13711	7819.3	18	0.0244891
13713	7819.35	18	0.0245129
13715	7819.4	18	0.0244631
13717	7819.45	18	0.0244738
13719	7819.5	18	0.0245152
13721	7819.55	18	0.0245155
13723	7819.6	18	0.0244601
13725	7819.65	18	0.0244543
13727	7819.7	18	0.0244904
13729	7819.75	18	0.0245464
13731	7819.8	18	0.0245933
13733	7819.85	18	0.024552
13735	7819.9	18	0.0245536
13737	7819.95	18	0.0245487
13739	7820	18	0.0245249
13741	7820.05	18	0.0245018
13743	7820.1	18	0.0244572
13745	7820.15	18	0.0244191
13747	7820.2	18	0.0244149
13749	7820.25	18	0.0243335
13751	7820.3	18	0.0242986
13753	7820.35	18	0.0242911
13755	7820.4	18	0.0243992
13757	7820.45	18	0.0243256
13759	7820.5	18	0.0243804
13761	7820.55	18	0.024283
13763	7820.6	18	0.0243022
13765	7820.65	18	0.0243214
13767	7820.7	18	0.0242849
13769	7820.75	18	0.024298
13771	7820.8	18	0.0243309
13773	7820.85	18	0.0243341
13775	7820.9	18	0.0243068
13777	7820.95	18	0.0243221
13779	7821	18	0.0243243
13781	7821.05	18	0.0243035
13783	7821.1	18	0.0243133
13785	7821.15	18	0.0242866
13787	7821.2	18	0.0243201
13789	7821.25	18	0.0243273
13791	7821.3	18	0.0242641
13793	7821.35	18	0.0243296
13795	7821.4	18	0.0243751
13797	7821.45	18	0.024341
13799	7821.5	18	0.0243423
13801	7821.55	18	0.0243269
13803	7821.6	18	0.0243149
13805	7821.65	18	0.0243247
13807	7821.7	18	0.0243357
13809	7821.75	18	0.0243243
13811	7821.8	18	0.0243266
13813	7821.85	18	0.0243094
13815	7821.9	18	0.0243028
13817	7821.95	18	0.0243247
13819	7822	18	0.0242781
13821	7822.05	18	0.0242319
13823	7822.1	18	0.0243383
13825	7822.15	18	0.0242833
13827	7822.2	18	0.0243693
13829	7822.25	18	0.0243426
13831	7822.3	18	0.0243996
13833	7822.35	18	0.0243677
13835	7822.4	18	0.0244028
13837	7822.45	18	0.0243696
13839	7822.5	18	0.0243468
13841	7822.55	18	0.0243918
13843	7822.6	18	0.0243208
13845	7822.65	18	0.0243152
13847	7822.7	18	0.0243484
13849	7822.75	18	0.024368
13851	7822.8	18	0.0243344
13853	7822.85	18	0.0243429
13855	7822.9	18	0.0243413
13857	7822.95	18	0.0243576
13859	7823	18	0.0243992
13861	7823.05	18	0.024311
13863	7823.1	18	0.024298
13865	7823.15	18	0.0243048
13867	7823.2	18	0.0242713
13869	7823.25	18	0.0242836
13871	7823.3	18	0.0242325
13873	7823.35	18	0.0242377
13875	7823.4	18	0.0242729
13877	7823.45	18	0.0242442
13879	7823.5	18	0.0242436
13881	7823.55	18	0.0242781
13883	7823.6	18	0.0242433
13885	7823.65	18	0.0242791
13887	7823.7	18	0.0242117
13889	7823.75	18	0.024199
13891	7823.8	18	0.0241814
13893	7823.85	18	0.0241885
13895	7823.9	18	0.0241758
13897	7823.95	18	0.0242218
13899	7824	18	0.0242263
13901	7824.05	18	0.0242335
13903	7824.1	18	0.0241742
13905	7824.15	18	0.0242126
13907	7824.2	18	0.0244852
13909	7824.25	18	0.0245152
13911	7824.3	18	0.0245683
13913	7824.35	18	0.0246148
13915	7824.4	18	0.0246064
13917	7824.45	18	0.0246975
13919	7824.5	18	0.0247285
13921	7824.55	18	0.0246881
13923	7824.6	18	0.0246191
13925	7824.65	18	0.0246259
13927	7824.7	18	0.0245657
13929	7824.75	18	0.024606
13931	7824.8	18	0.0245744
13933	7824.85	18	0.0246435
13935	7824.9	18	0.0247142
13937	7824.95	18	0.0246826
13939	7825	18	0.0246588
13941	7825.05	18	0.0246861
13943	7825.1	18	0.0245842
13945	7825.15	18	0.0244728
13947	7825.2	18	0.0244507
13949	7825.25	18	0.0244693
13951	7825.3	18	0.0244888
13953	7825.35	18	0.0245357
13955	7825.4	18	0.0246031
13957	7825.45	18	0.0245481
13959	7825.5	18	0.0245318
13961	7825.55	18	0.0245683
13963	7825.6	18	0.0246327
13965	7825.65	18	0.0246438
13967	7825.7	18	0.0245898
13969	7825.75	18	0.0245617
13971	7825.8	18	0.0246503
13973	7825.85	18	0.0246647
13975	7825.9	18	0.0247311
13977	7825.95	18	0.0247923
13979	7826	18	0.0248317
13981	7826.05	18	0.0247822
13983	7826.1	18	0.0248464
13985	7826.15	18	0.0247601
13987	7826.2	18	0.0247575
13989	7826.25	18	0.0247887
13991	7826.3	18	0.0248125
13993	7826.35	18	0.0247959
13995	7826.4	18	0.0247578
13997	7826.45	18	0.0247109
13999	7826.5	18	0.0247115
14001	7826.55	18	0.0247562
14003	7826.6	18	0.0247194
14005	7826.65	18	0.0246927
14007	7826.7	18	0.0247047
14009	7826.75	18	0.0246806
14011	7826.8	18	0.0246715
14013	7826.85	18	0.0246731
14015	7826.9	18	0.024623
14017	7826.95	18	0.0246282
14019	7827	18	0.0246002
14021	7827.05	18	0.0245754
14023	7827.1	18	0.0246116
14025	7827.15	18	0.0245735
14027	7827.2	18	0.0245888
14029	7827.25	18	0.0246083
14031	7827.3	18	0.0245438
14033	7827.35	18	0.0245744
14035	7827.4	18	0.0246321
14037	7827.45	18	0.0245989
14039	7827.5	18	0.0245956
14041	7827.55	18	0.0245376
14043	7827.6	18	0.024523
14045	7827.65	18	0.0245276
14047	7827.7	18	0.0245305
14049	7827.75	18	0.0245025
14051	7827.8	18	0.0245259
14053	7827.85	18	0.0244904
14055	7827.9	18	0.0244592
14057	7827.95	18	0.0244093
14059	7828	18	0.0243865
14061	7828.05	18	0.0244386
14063	7828.1	18	0.0244308
14065	7828.15	18	0.024493
14067	7828.2	18	0.0244461
14069	7828.25	18	0.0244667
14071	7828.3	18	0.0245165
14073	7828.35	18	0.024521
14075	7828.4	18	0.0245214
14077	7828.45	18	0.024467
14079	7828.5	18	0.0244452
14081	7828.55	18	0.0244025
14083	7828.6	18	0.024439
14085	7828.65	18	0.024425
14087	7828.7	18	0.0243784
14089	7828.75	18	0.024424
14091	7828.8	18	0.0244084
14093	7828.85	18	0.0245543
14095	7828.9	18	0.0244305
14097	7828.95	18	0.0244751
14099	7829	18	0.0244859
14101	7829.05	18	0.0244504
14103	7829.1	18	0.0244338
14105	7829.15	18	0.0244279
14107	7829.2	18	0.0243911
14109	7829.25	18	0.024408
14111	7829.3	18	0.0243924
14113	7829.35	18	0.0244051
14115	7829.4	18	0.0244058
14117	7829.45	18	0.0244233
14119	7829.5	18	0.0244631
14121	7829.55	18	0.0243856
14123	7829.6	18	0.0244074
14125	7829.65	18	0.024467
14127	7829.7	18	0.0244357
14129	7829.75	18	0.0244295
14131	7829.8	18	0.0244468
14133	7829.85	18	0.0244393
14135	7829.9	18	0.0244973
14137	7829.95	18	0.0244976
14139	7830	18	0.0245604
14141	7830.05	18	0.0246109
14143	7830.1	18	0.0245611
14145	7830.15	18	0.0246533
14147	7830.2	18	0.02458
14149	7830.25	18	0.0246389
14151	7830.3	18	0.0246643
14153	7830.35	18	0.0246226
14155	7830.4	18	0.0244595
14157	7830.45	18	0.0244973
14159	7830.5	18	0.0244904
14161	7830.55	18	0.024551
14163	7830.6	18	0.0244702
14165	7830.65	18	0.0244468
14167	7830.7	18	0.0244022
14169	7830.75	18	0.0244598
14171	7830.8	18	0.0244468
14173	7830.85	18	0.0245601
14175	7830.9	18	0.0246047
14177	7830.95	18	0.024638
14179	7831	18	0.0246894
14181	7831.05	18	0.0246699
14183	7831.1	18	0.0246187
14185	7831.15	18	0.0246051
14187	7831.2	18	0.0245712
14189	7831.25	18	0.0246067
14191	7831.3	18	0.0245484
14193	7831.35	18	0.0245038
14195	7831.4	18	0.02455
14197	7831.45	18	0.0246109
14199	7831.5	18	0.0245477
14201	7831.55	18	0.0244992
14203	7831.6	18	0.024454
14205	7831.65	18	0.0244504
14207	7831.7	18	0.0245119
14209	7831.75	18	0.0244657
14211	7831.8	18	0.0245705
14213	7831.85	18	0.0245705
14215	7831.9	18	0.0246184
14217	7831.95	18	0.0245943
14219	7832	18	0.0246112
14221	7832.05	18	0.0245718
14223	7832.1	18	0.0245184
14225	7832.15	18	0.0244956
14227	7832.2	18	0.0244712
14229	7832.25	18	0.0244364
14231	7832.3	18	0.0244592
14233	7832.35	18	0.0244344
14235	7832.4	18	0.0244224
14237	7832.45	18	0.0243771
14239	7832.5	18	0.0243751
14241	7832.55	18	0.0243452
14243	7832.6	18	0.0243589
14245	7832.65	18	0.0243927
14247	7832.7	18	0.0243751
14249	7832.75	18	0.0243725
14251	7832.8	18	0.0243738
14253	7832.85	18	0.0243758
14255	7832.9	18	0.0243305
14257	7832.95	18	0.0243774
14259	7833	18	0.0243338
14261	7833.05	18	0.0243328
14263	7833.1	18	0.0243387
14265	7833.15	18	0.0243777
14267	7833.2	18	0.0243686
14269	7833.25	18	0.0243458
14271	7833.3	18	0.0243712
14273	7833.35	18	0.0243243
14275	7833.4	18	0.0242872
14277	7833.45	18	0.0243523
14279	7833.5	18	0.0245077
14281	7833.55	18	0.0244132
14283	7833.6	18	0.0244377
14285	7833.65	18	0.0244706
14287	7833.7	18	0.0244553
14289	7833.75	18	0.024578
14291	7833.8	18	0.0246064
14293	7833.85	18	0.0246034
14295	7833.9	18	0.024678
14297	7833.95	18	0.0246269
14299	7834	18	0.0245735
14301	7834.05	18	0.0245038
14303	7834.1	18	0.0245113
14305	7834.15	18	0.0244084
14307	7834.2	18	0.0244458
14309	7834.25	18	0.0245702
14311	7834.3	18	0.0245129
14313	7834.35	18	0.024565
14315	7834.4	18	0.0245777
14317	7834.45	18	0.0244461
14319	7834.5	18	0.0244116
14321	7834.55	18	0.0244005
14323	7834.6	18	0.0243979
14325	7834.65	18	0.0244058
14327	7834.7	18	0.0243748
14329	7834.75	18	0.0243416
14331	7834.8	18	0.0243706
14333	7834.85	18	0.0243302
14335	7834.9	18	0.0243396
14337	7834.95	18	0.024325
14339	7835	18	0.0243042
14341	7835.05	18	0.0242752
14343	7835.1	18	0.0242755
14345	7835.15	18	0.0243683
14347	7835.2	18	0.0243416
14349	7835.25	18	0.0243426
14351	7835.3	18	0.0243436
14353	7835.35	18	0.024339
14355	7835.4	18	0.0243576
14357	7835.45	18	0.0243374
14359	7835.5	18	0.0243097
14361	7835.55	18	0.0242941
14363	7835.6	18	0.0243195
14365	7835.65	18	0.0243432
14367	7835.7	18	0.0243084
14369	7835.75	18	0.0242719
14371	7835.8	18	0.024241
14373	7835.85	18	0.0242595
14375	7835.9	18	0.0242752
14377	7835.95	18	0.0242774
14379	7836	18	0.0243064
14381	7836.05	18	0.0242748
14383	7836.1	18	0.0242283
14385	7836.15	18	0.024284
14387	7836.2	18	0.0242498
14389	7836.25	18	0.0242452
14391	7836.3	18	0.0242048
14393	7836.35	18	0.0241732
14395	7836.4	18	0.0241345
14397	7836.45	18	0.0241384
14399	7836.5	18	0.0241504
14401	7836.55	18	0.0241543
14403	7836.6	18	0.024184
14405	7836.65	18	0.0241537
14407	7836.7	18	0.0242328
14409	7836.75	18	0.0242374
14411	7836.8	18	0.024169
14413	7836.85	18	0.0243155
14415	7836.9	18	0.0242227
14417	7836.95	18	0.0242553
14419	7837	18	0.0242647
14421	7837.05	18	0.0242328
14423	7837.1	18	0.0243491
14425	7837.15	18	0.0242963
14427	7837.2	18	0.0242654
14429	7837.25	18	0.0242745
14431	7837.3	18	0.0243136
14433	7837.35	18	0.0242423
14435	7837.4	18	0.0242719
14437	7837.45	18	0.0242338
14439	7837.5	18	0.0241885
14441	7837.55	18	0.0242719
14443	7837.6	18	0.0242328
14445	7837.65	18	0.0241602
14447	7837.7	18	0.0241977
14449	7837.75	18	0.0241866
14451	7837.8	18	0.0241843
14453	7837.85	18	0.0241511
14455	7837.9	18	0.0241407
14457	7837.95	18	0.0241931
14459	7838	18	0.0240938
14461	7838.05	18	0.0241472
14463	7838.1	18	0.0241276
14465	7838.15	18	0.0241511
14467	7838.2	18	0.0241498
14469	7838.25	18	0.0241934
14471	7838.3	18	0.0241742
14473	7838.35	18	0.0242068
14475	7838.4	18	0.024199
14477	7838.45	18	0.0242221
14479	7838.5	18	0.0242758
14481	7838.55	18	0.0242263
14483	7838.6	18	0.0242634
14485	7838.65	18	0.0242843
14487	7838.7	18	0.0242358
14489	7838.75	18	0.0243035
14491	7838.8	18	0.0243537
14493	7838.85	18	0.024397
14495	7838.9	18	0.0243931
14497	7838.95	18	0.0244592
14499	7839	18	0.02451
14501	7839.05	18	0.0247506
14503	7839.1	18	0.0249089
14505	7839.15	18	0.0249665
14507	7839.2	18	0.0250235
14509	7839.25	18	0.0250353
14511	7839.3	18	0.0250037
14513	7839.35	18	0.0250968
14515	7839.4	18	0.0250284
14517	7839.45	18	0.0250952
14519	7839.5	18	0.0249685
14521	7839.55	18	0.0248724
14523	7839.6	18	0.024877
14525	7839.65	18	0.0248408
14527	7839.7	18	0.0247581
14529	7839.75	18	0.0248128
14531	7839.8	18	0.0248206
14533	7839.85	18	0.0248776
14535	7839.9	18	0.0248487
14537	7839.95	18	0.0248164
14539	7840	18	0.0247724
14541	7840.05	18	0.0247819
14543	7840.1	18	0.0247448
14545	7840.15	18	0.0246793
14547	7840.2	18	0.0247135
14549	7840.25	18	0.0247054
14551	7840.3	18	0.0246643
14553	7840.35	18	0.0247063
14555	7840.4	18	0.0246122
14557	7840.45	18	0.024623
14559	7840.5	18	0.0245657
14561	7840.55	18	0.0245015
14563	7840.6	18	0.024564
14565	7840.65	18	0.0244999
14567	7840.7	18	0.0244546
14569	7840.75	18	0.0244826
14571	7840.8	18	0.0243813
14573	7840.85	18	0.024367
14575	7840.9	18	0.0243556
14577	7840.95	18	0.0244041
14579	7841	18	0.0243846
14581	7841.05	18	0.0244286
14583	7841.1	18	0.0243963
14585	7841.15	18	0.0243673
14587	7841.2	18	0.0244227
14589	7841.25	18	0.0244025
14591	7841.3	18	0.0244754
14593	7841.35	18	0.0244634
14595	7841.4	18	0.0244654
14597	7841.45	18	0.0244605
14599	7841.5	18	0.0244474
14601	7841.55	18	0.0244194
14603	7841.6	18	0.024452
14605	7841.65	18	0.0244155
14607	7841.7	18	0.0244071
14609	7841.75	18	0.0244699
14611	7841.8	18	0.0244373
14613	7841.85	18	0.0244377
14615	7841.9	18	0.0244263
14617	7841.95	18	0.0245087
14619	7842	18	0.0245318
14621	7842.05	18	0.0246155
14623	7842.1	18	0.0246288
14625	7842.15	18	0.0245601
14627	7842.2	18	0.0246099
14629	7842.25	18	0.024551
14631	7842.3	18	0.0245419
14633	7842.35	18	0.024496
14635	7842.4	18	0.0244429
14637	7842.45	18	0.0244728
14639	7842.5	18	0.0244276
14641	7842.55	18	0.0244986
14643	7842.6	18	0.0245022
14645	7842.65	18	0.0244781
14647	7842.7	18	0.0245324
14649	7842.75	18	0.024607
14651	7842.8	18	0.0245917
14653	7842.85	18	0.0246949
14655	7842.9	18	0.0248767
14657	7842.95	18	0.0248148
14659	7843	18	0.0247265
14661	7843.05	18	0.0247119
14663	7843.1	18	0.0246047
14665	7843.15	18	0.0246178
14667	7843.2	18	0.0245715
14669	7843.25	18	0.0245871
14671	7843.3	18	0.0246542
14673	7843.35	18	0.0247483
14675	7843.4	18	0.0246845
14677	7843.45	18	0.0247272
14679	7843.5	18	0.024706
14681	7843.55	18	0.0246634
14683	7843.6	18	0.0246047
14685	7843.65	18	0.0245683
14687	7843.7	18	0.0244953
14689	7843.75	18	0.0245386
14691	7843.8	18	0.0245106
14693	7843.85	18	0.0244875
14695	7843.9	18	0.0245116
14697	7843.95	18	0.0244855
14699	7844	18	0.0244569
14701	7844.05	18	0.024468
14703	7844.1	18	0.0244403
14705	7844.15	18	0.024454
14707	7844.2	18	0.0244696
14709	7844.25	18	0.024394
14711	7844.3	18	0.0243667
14713	7844.35	18	0.0244012
14715	7844.4	18	0.0244032
14717	7844.45	18	0.0244325
14719	7844.5	18	0.0243947
14721	7844.55	18	0.0243924
14723	7844.6	18	0.0243471
14725	7844.65	18	0.0243071
14727	7844.7	18	0.0243416
14729	7844.75	18	0.0244396
14731	7844.8	18	0.0243296
14733	7844.85	18	0.0243735
14735	7844.9	18	0.0243266
14737	7844.95	18	0.0243006
14739	7845	18	0.0243172
14741	7845.05	18	0.0243172
14743	7845.1	18	0.0243517
14745	7845.15	18	0.0243699
14747	7845.2	18	0.0243989
14749	7845.25	18	0.0244276
14751	7845.3	18	0.0244465
14753	7845.35	18	0.0243804
14755	7845.4	18	0.0244481
14757	7845.45	18	0.0244116
14759	7845.5	18	0.0243804
14761	7845.55	18	0.0244393
14763	7845.6	18	0.0243914
14765	7845.65	18	0.0244673
14767	7845.7	18	0.0244227
14769	7845.75	18	0.0245002
14771	7845.8	18	0.0244921
14773	7845.85	18	0.0245712
14775	7845.9	18	0.0246031
14777	7845.95	18	0.0245832
14779	7846	18	0.0246129
14781	7846.05	18	0.0244572
14783	7846.1	18	0.0245741
14785	7846.15	18	0.0244546
14787	7846.2	18	0.0245181
14789	7846.25	18	0.0245657
14791	7846.3	18	0.0245601
14793	7846.35	18	0.0245289
14795	7846.4	18	0.0245481
14797	7846.45	18	0.0244595
14799	7846.5	18	0.024454
14801	7846.55	18	0.0245334
14803	7846.6	18	0.0245683
14805	7846.65	18	0.024552
14807	7846.7	18	0.0245871
14809	7846.75	18	0.0244566
14811	7846.8	18	0.0244761
14813	7846.85	18	0.0244709
14815	7846.9	18	0.0244233
14817	7846.95	18	0.024466
14819	7847	18	0.0243709
14821	7847.05	18	0.0242836
14823	7847.1	18	0.0243191
14825	7847.15	18	0.0243693
14827	7847.2	18	0.0243471
14829	7847.25	18	0.0243449
14831	7847.3	18	0.0242875
14833	7847.35	18	0.0243351
14835	7847.4	18	0.0243462
14837	7847.45	18	0.0243077
14839	7847.5	18	0.0243201
14841	7847.55	18	0.0242739
14843	7847.6	18	0.0242615
14845	7847.65	18	0.0243217
14847	7847.7	18	0.0243116
14849	7847.75	18	0.0243015
14851	7847.8	18	0.0243292
14853	7847.85	18	0.0242745
14855	7847.9	18	0.0243484
14857	7847.95	18	0.024355
14859	7848	18	0.0243263
14861	7848.05	18	0.0243256
14863	7848.1	18	0.0242576
14865	7848.15	18	0.0242934
14867	7848.2	18	0.0243488
14869	7848.25	18	0.0243781
14871	7848.3	18	0.0243605
14873	7848.35	18	0.0243224
14875	7848.4	18	0.0243064
14877	7848.45	18	0.0243175
14879	7848.5	18	0.024338
14881	7848.55	18	0.0242576
14883	7848.6	18	0.0243038
14885	7848.65	18	0.024297
14887	7848.7	18	0.0244032
14889	7848.75	18	0.0243895
14891	7848.8	18	0.0243677
14893	7848.85	18	0.0243146
14895	7848.9	18	0.0243006
14897	7848.95	18	0.024255
14899	7849	18	0.024295
14901	7849.05	18	0.0242107
14903	7849.1	18	0.0242055
14905	7849.15	18	0.0242755
14907	7849.2	18	0.0242113
14909	7849.25	18	0.0242045
14911	7849.3	18	0.0242035
14913	7849.35	18	0.0241485
14915	7849.4	18	0.0241241
14917	7849.45	18	0.0242084
14919	7849.5	18	0.0241892
14921	7849.55	18	0.0242019
14923	7849.6	18	0.0242504
14925	7849.65	18	0.0242547
14927	7849.7	18	0.0242462
14929	7849.75	18	0.0242276
14931	7849.8	18	0.0241784
14933	7849.85	18	0.02421
14935	7849.9	18	0.0241726
14937	7849.95	18	0.0242165
14939	7850	18	0.0241723
14941	7850.05	18	0.0242162
14943	7850.1	18	0.0242507
14945	7850.15	18	0.0242052
14947	7850.2	18	0.0242892
14949	7850.25	18	0.0243361
14951	7850.3	18	0.0242547
14953	7850.35	18	0.0242664
14955	7850.4	18	0.0242595
14957	7850.45	18	0.0242192
14959	7850.5	18	0.0242459
14961	7850.55	18	0.0242309
14963	7850.6	18	0.0241827
14965	7850.65	18	0.0241876
14967	7850.7	18	0.024126
14969	7850.75	18	0.0242149
14971	7850.8	18	0.0241664
14973	7850.85	18	0.0241905
14975	7850.9	18	0.0241273
14977	7850.95	18	0.0241547
14979	7851	18	0.0242038
14981	7851.05	18	0.0242211
14983	7851.1	18	0.024252
14985	7851.15	18	0.0242475
14987	7851.2	18	0.0242634
14989	7851.25	18	0.0242442
14991	7851.3	18	0.0242612
14993	7851.35	18	0.0242849
14995	7851.4	18	0.0242146
14997	7851.45	18	0.0242612
14999	7851.5	18	0.0242866
15001	7851.55	18	0.0242406
15003	7851.6	18	0.0242709
15005	7851.65	18	0.0243074
15007	7851.7	18	0.0244644
15009	7851.75	18	0.0245663
15011	7851.8	18	0.0245634
15013	7851.85	18	0.0245849
15015	7851.9	18	0.0246243
15017	7851.95	18	0.024608
15019	7852	18	0.0246627
15021	7852.05	18	0.0247233
15023	7852.1	18	0.0247624
15025	7852.15	18	0.0246588
15027	7852.2	18	0.024606
15029	7852.25	18	0.024623
15031	7852.3	18	0.024523
15033	7852.35	18	0.0244468
15035	7852.4	18	0.0245207
15037	7852.45	18	0.0244781
15039	7852.5	18	0.0245103
15041	7852.55	18	0.0245445
15043	7852.6	18	0.0245093
15045	7852.65	18	0.0245292
15047	7852.7	18	0.0245067
15049	7852.75	18	0.0245191
15051	7852.8	18	0.0244308
15053	7852.85	18	0.0244416
15055	7852.9	18	0.0243914
15057	7852.95	18	0.0244442
15059	7853	18	0.0244012
15061	7853.05	18	0.0243807
15063	7853.1	18	0.0244132
15065	7853.15	18	0.0243566
15067	7853.2	18	0.0243908
15069	7853.25	18	0.0243976
15071	7853.3	18	0.0243644
15073	7853.35	18	0.0243038
15075	7853.4	18	0.0243514
15077	7853.45	18	0.024365
15079	7853.5	18	0.0242784
15081	7853.55	18	0.0243664
15083	7853.6	18	0.024337
15085	7853.65	18	0.0243064
15087	7853.7	18	0.0243595
15089	7853.75	18	0.0243058
15091	7853.8	18	0.0243488
15093	7853.85	18	0.0244259
15095	7853.9	18	0.0243182
15097	7853.95	18	0.0243696
15099	7854	18	0.0243432
15101	7854.05	18	0.0243165
15103	7854.1	18	0.0243878
15105	7854.15	18	0.0243533
15107	7854.2	18	0.024324
15109	7854.25	18	0.0243719
15111	7854.3	18	0.024365
15113	7854.35	18	0.0243944
15115	7854.4	18	0.0243771
15117	7854.45	18	0.0243735
15119	7854.5	18	0.0243299
15121	7854.55	18	0.0243077
15123	7854.6	18	0.0243442
15125	7854.65	18	0.0242957
15127	7854.7	18	0.0243149
15129	7854.75	18	0.0242791
15131	7854.8	18	0.0243494
15133	7854.85	18	0.0242579
15135	7854.9	18	0.0243543
15137	7854.95	18	0.0242885
15139	7855	18	0.0243178
15141	7855.05	18	0.024383
15143	7855.1	18	0.0243406
15145	7855.15	18	0.0242849
15147	7855.2	18	0.0243387
15149	7855.25	18	0.0243097
15151	7855.3	18	0.0242823
15153	7855.35	18	0.0243253
15155	7855.4	18	0.0243038
15157	7855.45	18	0.0243396
15159	7855.5	18	0.0242944
15161	7855.55	18	0.0243165
15163	7855.6	18	0.0243253
15165	7855.65	18	0.0243423
15167	7855.7	18	0.0243657
15169	7855.75	18	0.0243077
15171	7855.8	18	0.0243064
15173	7855.85	18	0.0242859
15175	7855.9	18	0.0242934
15177	7855.95	18	0.0242781
15179	7856	18	0.0242752
15181	7856.05	18	0.0242494
15183	7856.1	18	0.0242569
15185	7856.15	18	0.024268
15187	7856.2	18	0.0242823
15189	7856.25	18	0.0242416
15191	7856.3	18	0.0242524
15193	7856.35	18	0.0242706
15195	7856.4	18	0.0242993
15197	7856.45	18	0.0242742
15199	7856.5	18	0.0243055
15201	7856.55	18	0.0243182
15203	7856.6	18	0.0242709
15205	7856.65	18	0.0242713
15207	7856.7	18	0.0242501
15209	7856.75	18	0.0242507
15211	7856.8	18	0.0242003
15213	7856.85	18	0.0241908
15215	7856.9	18	0.024196
15217	7856.95	18	0.0241931
15219	7857	18	0.0241527
15221	7857.05	18	0.0241423
15223	7857.1	18	0.0241478
15225	7857.15	18	0.0241446
15227	7857.2	18	0.0241586
15229	7857.25	18	0.0241306
15231	7857.3	18	0.0241827
15233	7857.35	18	0.0242393
15235	7857.4	18	0.0241898
15237	7857.45	18	0.0242986
15239	7857.5	18	0.0242423
15241	7857.55	18	0.0242071
15243	7857.6	18	0.0242302
15245	7857.65	18	0.0242022
15247	7857.7	18	0.0242156
15249	7857.75	18	0.0241563
15251	7857.8	18	0.0241846
15253	7857.85	18	0.0241387
15255	7857.9	18	0.0242136
15257	7857.95	18	0.0241719
15259	7858	18	0.0242322
15261	7858.05	18	0.0241967
15263	7858.1	18	0.0242511
15265	7858.15	18	0.0241944
15267	7858.2	18	0.0242032
15269	7858.25	18	0.0242436
15271	7858.3	18	0.0241573
15273	7858.35	18	0.0241804
15275	7858.4	18	0.0242081
15277	7858.45	18	0.0241859
15279	7858.5	18	0.0242257
15281	7858.55	18	0.0242139
15283	7858.6	18	0.0242237
15285	7858.65	18	0.0242901
15287	7858.7	18	0.024255
15289	7858.75	18	0.0242439
15291	7858.8	18	0.0242833
15293	7858.85	18	0.0242175
15295	7858.9	18	0.0242748
15297	7858.95	18	0.0242647
15299	7859	18	0.0242433
15301	7859.05	18	0.024337
15303	7859.1	18	0.0242703
15305	7859.15	18	0.0243852
15307	7859.2	18	0.0243924
15309	7859.25	18	0.0244383
15311	7859.3	18	0.0244478
15313	7859.35	18	0.024451
15315	7859.4	18	0.024423
15317	7859.45	18	0.0244807
15319	7859.5	18	0.0244028
15321	7859.55	18	0.0244807
15323	7859.6	18	0.0244474
15325	7859.65	18	0.0244562
15327	7859.7	18	0.0244829
15329	7859.75	18	0.0244582
15331	7859.8	18	0.0244927
15333	7859.85	18	0.0245409
15335	7859.9	18	0.0244833
15337	7859.95	18	0.0244878
15339	7860	18	0.0245119
15341	7860.05	18	0.0244836
15343	7860.1	18	0.0244767
15345	7860.15	18	0.0245223
15347	7860.2	18	0.0244585
15349	7860.25	18	0.0244852
15351	7860.3	18	0.0245171
15353	7860.35	18	0.024452
15355	7860.4	18	0.0244191
15357	7860.45	18	0.0245386
15359	7860.5	18	0.0243869
15361	7860.55	18	0.0244836
15363	7860.6	18	0.0244334
15365	7860.65	18	0.0245341
15367	7860.7	18	0.0245184
15369	7860.75	18	0.0245399
15371	7860.8	18	0.0245028
15373	7860.85	18	0.024507
15375	7860.9	18	0.0245451
15377	7860.95	18	0.0244266
15379	7861	18	0.0244634
15381	7861.05	18	0.0244797
15383	7861.1	18	0.0244442
15385	7861.15	18	0.0243963
15387	7861.2	18	0.0244953
15389	7861.25	18	0.0244458
15391	7861.3	18	0.0244878
15393	7861.35	18	0.0245025
15395	7861.4	18	0.0244237
15397	7861.45	18	0.0244321
15399	7861.5	18	0.0243569
15401	7861.55	18	0.0243247
15403	7861.6	18	0.0243211
15405	7861.65	18	0.0242755
15407	7861.7	18	0.0242986
15409	7861.75	18	0.0242807
15411	7861.8	18	0.0242514
15413	7861.85	18	0.0242439
15415	7861.9	18	0.0243413
15417	7861.95	18	0.0243315
15419	7862	18	0.0242905
15421	7862.05	18	0.0242862
15423	7862.1	18	0.0243348
15425	7862.15	18	0.0243159
15427	7862.2	18	0.0242947
15429	7862.25	18	0.0243224
15431	7862.3	18	0.024323
15433	7862.35	18	0.0242739
15435	7862.4	18	0.0242547
15437	7862.45	18	0.0242628
15439	7862.5	18	0.0241915
15441	7862.55	18	0.0241951
15443	7862.6	18	0.0241625
15445	7862.65	18	0.0241234
15447	7862.7	18	0.0241172
15449	7862.75	18	0.0241175
15451	7862.8	18	0.0241303
15453	7862.85	18	0.024113
15455	7862.9	18	0.024155
15457	7862.95	18	0.0241706
15459	7863	18	0.0241677
15461	7863.05	18	0.0241615
15463	7863.1	18	0.0242309
15465	7863.15	18	0.0242384
15467	7863.2	18	0.0242426
15469	7863.25	18	0.0242367
15471	7863.3	18	0.0242309
15473	7863.35	18	0.0242667
15475	7863.4	18	0.024238
15477	7863.45	18	0.0242338
15479	7863.5	18	0.0242361
15481	7863.55	18	0.0241674
15483	7863.6	18	0.0241872
15485	7863.65	18	0.0242348
15487	7863.7	18	0.0242019
15489	7863.75	18	0.0241814
15491	7863.8	18	0.0242003
15493	7863.85	18	0.0241726
15495	7863.9	18	0.0242104
15497	7863.95	18	0.0241179
15499	7864	18	0.0241006
15501	7864.05	18	0.0241293
15503	7864.1	18	0.024068
15505	7864.15	18	0.0241101
15507	7864.2	18	0.0241508
15509	7864.25	18	0.0243523
15511	7864.3	18	0.0244354
15513	7864.35	18	0.0244797
15515	7864.4	18	0.0244969
15517	7864.45	18	0.024565
15519	7864.5	18	0.024496
15521	7864.55	18	0.0244621
15523	7864.6	18	0.0244448
15525	7864.65	18	0.0242638
15527	7864.7	18	0.0242556
15529	7864.75	18	0.0242605
15531	7864.8	18	0.0242804
15533	7864.85	18	0.0243113
15535	7864.9	18	0.0242765
15537	7864.95	18	0.0243735
15539	7865	18	0.0243572
15541	7865.05	18	0.0243644
15543	7865.1	18	0.0243501
15545	7865.15	18	0.0243449
15547	7865.2	18	0.0243416
15549	7865.25	18	0.0243266
15551	7865.3	18	0.0243331
15553	7865.35	18	0.0244553
15555	7865.4	18	0.0244426
15557	7865.45	18	0.0244513
15559	7865.5	18	0.0244487
15561	7865.55	18	0.0245139
15563	7865.6	18	0.0244559
15565	7865.65	18	0.0244041
15567	7865.7	18	0.0243413
15569	7865.75	18	0.0244585
15571	7865.8	18	0.0244025
15573	7865.85	18	0.0243576
15575	7865.9	18	0.0243074
15577	7865.95	18	0.0243367
15579	7866	18	0.0242615
15581	7866.05	18	0.024352
15583	7866.1	18	0.0244155
15585	7866.15	18	0.0243468
15587	7866.2	18	0.0243286
15589	7866.25	18	0.0243123
15591	7866.3	18	0.0242455
15593	7866.35	18	0.0243504
15595	7866.4	18	0.0243387
15597	7866.45	18	0.0242957
15599	7866.5	18	0.0242872
15601	7866.55	18	0.0242136
15603	7866.6	18	0.0242276
15605	7866.65	18	0.0242433
15607	7866.7	18	0.0243074
15609	7866.75	18	0.024281
15611	7866.8	18	0.0242713
15613	7866.85	18	0.0243058
15615	7866.9	18	0.0243129
15617	7866.95	18	0.024296
15619	7867	18	0.0243383
15621	7867.05	18	0.0243074
15623	7867.1	18	0.0242993
15625	7867.15	18	0.0243126
15627	7867.2	18	0.0242768
15629	7867.25	18	0.0242446
15631	7867.3	18	0.0242859
15633	7867.35	18	0.0243859
15635	7867.4	18	0.024353
15637	7867.45	18	0.0243569
15639	7867.5	18	0.0244272
15641	7867.55	18	0.02438
15643	7867.6	18	0.0243305
15645	7867.65	18	0.0243061
15647	7867.7	18	0.0243224
15649	7867.75	18	0.0243344
15651	7867.8	18	0.024213
15653	7867.85	18	0.0242009
15655	7867.9	18	0.0242182
15657	7867.95	18	0.0242527
15659	7868	18	0.024256
15661	7868.05	18	0.0242201
15663	7868.1	18	0.0242143
15665	7868.15	18	0.0241866
15667	7868.2	18	0.024169
15669	7868.25	18	0.0241312
15671	7868.3	18	0.0240964
15673	7868.35	18	0.0241276
15675	7868.4	18	0.0241175
15677	7868.45	18	0.0241596
15679	7868.5	18	0.0241436
15681	7868.55	18	0.0241195
15683	7868.6	18	0.0241684
15685	7868.65	18	0.0240749
15687	7868.7	18	0.0240645
15689	7868.75	18	0.0240303
15691	7868.8	18	0.0240091
15693	7868.85	18	0.0240889
15695	7868.9	18	0.0241537
15697	7868.95	18	0.0241547
15699	7869	18	0.0242139
15701	7869.05	18	0.0241579
15703	7869.1	18	0.0241316
15705	7869.15	18	0.0241622
15707	7869.2	18	0.0241898
15709	7869.25	18	0.0241752
15711	7869.3	18	0.0241661
15713	7869.35	18	0.0241488
15715	7869.4	18	0.0241784
15717	7869.45	18	0.0240853
15719	7869.5	18	0.0241091
15721	7869.55	18	0.0240847
15723	7869.6	18	0.0240739
15725	7869.65	18	0.0240837
15727	7869.7	18	0.0241006
15729	7869.75	18	0.0241306
15731	7869.8	18	0.0240902
15733	7869.85	18	0.0240876
15735	7869.9	18	0.0240593
15737	7869.95	18	0.0240759
15739	7870	18	0.024013
15741	7870.05	18	0.0240358
15743	7870.1	18	0.0240446
15745	7870.15	18	0.0239915
15747	7870.2	18	0.0240075
15749	7870.25	18	0.0239951
15751	7870.3	18	0.0240104
15753	7870.35	18	0.0240352
15755	7870.4	18	0.0240628
15757	7870.45	18	0.0240166
15759	7870.5	18	0.0241166
15761	7870.55	18	0.0240329
15763	7870.6	18	0.0240426
15765	7870.65	18	0.0239925
15767	7870.7	18	0.0240111
15769	7870.75	18	0.0240866
15771	7870.8	18	0.0240944
15773	7870.85	18	0.0240391
15775	7870.9	18	0.0240694
15777	7870.95	18	0.0241231
15779	7871	18	0.0241462
15781	7871.05	18	0.0241706
15783	7871.1	18	0.0241368
15785	7871.15	18	0.0241384
15787	7871.2	18	0.024153
15789	7871.25	18	0.0241762
15791	7871.3	18	0.0241189
15793	7871.35	18	0.0241335
15795	7871.4	18	0.0240948
15797	7871.45	18	0.0240713
15799	7871.5	18	0.0240895
15801	7871.55	18	0.0240749
15803	7871.6	18	0.0241299
15805	7871.65	18	0.0241182
15807	7871.7	18	0.0241622
15809	7871.75	18	0.0240791
15811	7871.8	18	0.0240609
15813	7871.85	18	0.0241094
15815	7871.9	18	0.0241221
15817	7871.95	18	0.0241973
15819	7872	18	0.0242022
15821	7872.05	18	0.0241501
15823	7872.1	18	0.0241817
15825	7872.15	18	0.024153
15827	7872.2	18	0.0241664
15829	7872.25	18	0.0241814
15831	7872.3	18	0.0241221
15833	7872.35	18	0.0241335
15835	7872.4	18	0.0241827
15837	7872.45	18	0.0241954
15839	7872.5	18	0.0241654
15841	7872.55	18	0.0241713
15843	7872.6	18	0.0242006
15845	7872.65	18	0.0242455
15847	7872.7	18	0.0241579
15849	7872.75	18	0.0242377
15851	7872.8	18	0.0242599
15853	7872.85	18	0.0242198
15855	7872.9	18	0.0242957
15857	7872.95	18	0.0244448
15859	7873	18	0.0245031
15861	7873.05	18	0.0245399
15863	7873.1	18	0.0244976
15865	7873.15	18	0.0245497
15867	7873.2	18	0.024549
15869	7873.25	18	0.0245087
15871	7873.3	18	0.0245152
15873	7873.35	18	0.0245536
15875	7873.4	18	0.0245087
15877	7873.45	18	0.024567
15879	7873.5	18	0.0245106
15881	7873.55	18	0.0245188
15883	7873.6	18	0.0244761
15885	7873.65	18	0.0244614
15887	7873.7	18	0.0244149
15889	7873.75	18	0.0244647
15891	7873.8	18	0.0244129
15893	7873.85	18	0.0243908
15895	7873.9	18	0.024424
15897	7873.95	18	0.0243657
15899	7874	18	0.0243764
15901	7874.05	18	0.0244005
15903	7874.1	18	0.0244175
15905	7874.15	18	0.0244536
15907	7874.2	18	0.0244279
15909	7874.25	18	0.0244067
15911	7874.3	18	0.0244689
15913	7874.35	18	0.0244497
15915	7874.4	18	0.0243888
15917	7874.45	18	0.0243761
15919	7874.5	18	0.0243315
15921	7874.55	18	0.0243279
15923	7874.6	18	0.0243214
15925	7874.65	18	0.0242934
15927	7874.7	18	0.0242787
15929	7874.75	18	0.0242719
15931	7874.8	18	0.0242341
15933	7874.85	18	0.0242586
15935	7874.9	18	0.0242433
15937	7874.95	18	0.0241973
15939	7875	18	0.0242533
15941	7875.05	18	0.024225
15943	7875.1	18	0.0242602
15945	7875.15	18	0.024326
15947	7875.2	18	0.0244074
15949	7875.25	18	0.0244012
15951	7875.3	18	0.0245041
15953	7875.35	18	0.0245569
15955	7875.4	18	0.0245826
15957	7875.45	18	0.0246347
15959	7875.5	18	0.0245318
15961	7875.55	18	0.0245093
15963	7875.6	18	0.0245188
15965	7875.65	18	0.024538
15967	7875.7	18	0.0245777
15969	7875.75	18	0.0246018
15971	7875.8	18	0.0245588
15973	7875.85	18	0.0246402
15975	7875.9	18	0.0245627
15977	7875.95	18	0.0245337
15979	7876	18	0.0244572
15981	7876.05	18	0.0244592
15983	7876.1	18	0.0244386
15985	7876.15	18	0.0244468
15987	7876.2	18	0.0244272
15989	7876.25	18	0.024494
15991	7876.3	18	0.0244794
15993	7876.35	18	0.0244702
15995	7876.4	18	0.0245543
15997	7876.45	18	0.0245523
15999	7876.5	18	0.0244696
16001	7876.55	18	0.024539
16003	7876.6	18	0.024623
16005	7876.65	18	0.0245696
16007	7876.7	18	0.0244973
16009	7876.75	18	0.0245686
16011	7876.8	18	0.024581
16013	7876.85	18	0.0246015
16015	7876.9	18	0.0246435
16017	7876.95	18	0.0246471
16019	7877	18	0.0245715
16021	7877.05	18	0.0245751
16023	7877.1	18	0.0245295
16025	7877.15	18	0.0245585
16027	7877.2	18	0.0246751
16029	7877.25	18	0.0247959
16031	7877.3	18	0.0247917
16033	7877.35	18	0.0248255
16035	7877.4	18	0.024849
16037	7877.45	18	0.0248158
16039	7877.5	18	0.0248301
16041	7877.55	18	0.0247721
16043	7877.6	18	0.0247855
16045	7877.65	18	0.024821
16047	7877.7	18	0.0247441
16049	7877.75	18	0.0247829
16051	7877.8	18	0.0248037
16053	7877.85	18	0.0247044
16055	7877.9	18	0.0246881
16057	7877.95	18	0.0247392
16059	7878	18	0.0247246
16061	7878.05	18	0.0247135
16063	7878.1	18	0.0247011
16065	7878.15	18	0.0246493
16067	7878.2	18	0.0246054
16069	7878.25	18	0.0246881
16071	7878.3	18	0.024606
16073	7878.35	18	0.0245803
16075	7878.4	18	0.0245865
16077	7878.45	18	0.0246171
16079	7878.5	18	0.0247324
16081	7878.55	18	0.024679
16083	7878.6	18	0.024651
16085	7878.65	18	0.024679
16087	7878.7	18	0.024622
16089	7878.75	18	0.0246178
16091	7878.8	18	0.0246695
16093	7878.85	18	0.0246875
16095	7878.9	18	0.0247063
16097	7878.95	18	0.0247571
16099	7879	18	0.0246894
16101	7879.05	18	0.0246686
16103	7879.1	18	0.0247057
16105	7879.15	18	0.0246337
16107	7879.2	18	0.0246334
16109	7879.25	18	0.0246308
16111	7879.3	18	0.0245995
16113	7879.35	18	0.0246148
16115	7879.4	18	0.0245546
16117	7879.45	18	0.0245175
16119	7879.5	18	0.0244979
16121	7879.55	18	0.0245917
16123	7879.6	18	0.0246363
16125	7879.65	18	0.0245699
16127	7879.7	18	0.0246907
16129	7879.75	18	0.0246777
16131	7879.8	18	0.0246663
16133	7879.85	18	0.0246813
16135	7879.9	18	0.0248105
16137	7879.95	18	0.0247239
16139	7880	18	0.0248701
16141	7880.05	18	0.0247816
16143	7880.1	18	0.0247926
16145	7880.15	18	0.0248418
16147	7880.2	18	0.0248978
16149	7880.25	18	0.0248672
16151	7880.3	18	0.0250173
16153	7880.35	18	0.0249392
16155	7880.4	18	0.0251652
16157	7880.45	18	0.0253394
16159	7880.5	18	0.025441
16161	7880.55	18	0.0254752
16163	7880.6	18	0.0255247
16165	7880.65	18	0.025554
16167	7880.7	18	0.0254697
16169	7880.75	18	0.0254677
16171	7880.8	18	0.0253876
16173	7880.85	18	0.0253108
16175	7880.9	18	0.0253531
16177	7880.95	18	0.0253736
16179	7881	18	0.0253222
16181	7881.05	18	0.0253059
16183	7881.1	18	0.0252971
16185	7881.15	18	0.0253069
16187	7881.2	18	0.0253593
16189	7881.25	18	0.0252857
16191	7881.3	18	0.0252189
16193	7881.35	18	0.0251714
16195	7881.4	18	0.0251303
16197	7881.45	18	0.0251183
16199	7881.5	18	0.0251183
16201	7881.55	18	0.0250011
16203	7881.6	18	0.0250353
16205	7881.65	18	0.0249757
16207	7881.7	18	0.0249144
16209	7881.75	18	0.0249112
16211	7881.8	18	0.0248864
16213	7881.85	18	0.0248545
16215	7881.9	18	0.0248451
16217	7881.95	18	0.0249623
16219	7882	18	0.0249662
16221	7882.05	18	0.0250177
16223	7882.1	18	0.0250353
16225	7882.15	18	0.0250353
16227	7882.2	18	0.0251105
16229	7882.25	18	0.025076
16231	7882.3	18	0.0250222
16233	7882.35	18	0.0250574
16235	7882.4	18	0.025118
16237	7882.45	18	0.0250395
16239	7882.5	18	0.0250268
16241	7882.55	18	0.0246761
16243	7882.6	18	0.0257465
16245	7882.65	18	0.0255925
16247	7882.7	18	0.0260282
16249	7882.75	18	0.0266157
16251	7882.8	18	0.0268397
16253	7882.85	18	0.0268394
16255	7882.9	18	0.0269218
16257	7882.95	18	0.0271872
16259	7883	18	0.0271494
16261	7883.05	18	0.0273204
16263	7883.1	18	0.0268355
16265	7883.15	18	0.0270722
16267	7883.2	18	0.0271963
16269	7883.25	18	0.0271722
16271	7883.3	18	0.0272494
16273	7883.35	18	0.0269866
16275	7883.4	18	0.0270231
16277	7883.45	18	0.0268329
16279	7883.5	18	0.0265912
16281	7883.55	18	0.0269423
16283	7883.6	18	0.0271807
16285	7883.65	18	0.0273888
16287	7883.7	18	0.0270621
16289	7883.75	18	0.0269964
16291	7883.8	18	0.0271781
16293	7883.85	18	0.0270117
16295	7883.9	18	0.0267423
16297	7883.95	18	0.0270928
16299	7884	18	0.0269654
16301	7884.05	18	0.0266974
16303	7884.1	18	0.0270042
16305	7884.15	18	0.026897
16307	7884.2	18	0.0268443
16309	7884.25	18	0.0267267
16311	7884.3	18	0.0269254
16313	7884.35	18	0.0268778
16315	7884.4	18	0.0267808
16317	7884.45	18	0.026714
16319	7884.5	18	0.026911
16321	7884.55	18	0.0268117
16323	7884.6	18	0.026815
16325	7884.65	18	0.0267638
16327	7884.7	18	0.0264571
16329	7884.75	18	0.0264242
16331	7884.8	18	0.0264382
16333	7884.85	18	0.026518
16335	7884.9	18	0.0264294
16337	7884.95	18	0.0264519
16339	7885	18	0.0264408
16341	7885.05	18	0.0264818
16343	7885.1	18	0.0263099
16345	7885.15	18	0.0263858
16347	7885.2	18	0.0264841
16349	7885.25	18	0.0263607
16351	7885.3	18	0.0262741
16353	7885.35	18	0.026263
16355	7885.4	18	0.0261783
16357	7885.45	18	0.0261076
16359	7885.5	18	0.0260803
16361	7885.55	18	0.0259477
16363	7885.6	18	0.0259119
16365	7885.65	18	0.0258868
16367	7885.7	18	0.0258624
16369	7885.75	18	0.0258826
16371	7885.8	18	0.0258119
16373	7885.85	18	0.0257312
16375	7885.9	18	0.0257273
16377	7885.95	18	0.0256703
16379	7886	18	0.0255762
16381	7886.05	18	0.0255534
16383	7886.1	18	0.025483
16385	7886.15	18	0.0254531
16387	7886.2	18	0.0254456
16389	7886.25	18	0.0254088
16391	7886.3	18	0.0255306
16393	7886.35	18	0.0255143
16395	7886.4	18	0.0254472
16397	7886.45	18	0.0254537
16399	7886.5	18	0.0253883
16401	7886.55	18	0.0254172
16403	7886.6	18	0.0253723
16405	7886.65	18	0.0253222
16407	7886.7	18	0.0253088
16409	7886.75	18	0.0252932
16411	7886.8	18	0.0252831
16413	7886.85	18	0.0252922
16415	7886.9	18	0.025301
16417	7886.95	18	0.025201
16419	7887	18	0.0251828
16421	7887.05	18	0.0252114
16423	7887.1	18	0.0251675
16425	7887.15	18	0.025229
16427	7887.2	18	0.02523
16429	7887.25	18	0.0251834
16431	7887.3	18	0.0251372
16433	7887.35	18	0.025132
16435	7887.4	18	0.025117
16437	7887.45	18	0.025104
16439	7887.5	18	0.0250854
16441	7887.55	18	0.0250053
16443	7887.6	18	0.0250532
16445	7887.65	18	0.0249815
16447	7887.7	18	0.0249053
16449	7887.75	18	0.0249919
16451	7887.8	18	0.0249597
16453	7887.85	18	0.0249372
16455	7887.9	18	0.0250128
16457	7887.95	18	0.0249805
16459	7888	18	0.024976
16461	7888.05	18	0.0250017
16463	7888.1	18	0.0249196
16465	7888.15	18	0.0248724
16467	7888.2	18	0.0248659
16469	7888.25	18	0.0248047
16471	7888.3	18	0.0248333
16473	7888.35	18	0.0248581
16475	7888.4	18	0.0247878
16477	7888.45	18	0.0247451
16479	7888.5	18	0.0247024
16481	7888.55	18	0.0247402
16483	7888.6	18	0.0247829
16485	7888.65	18	0.0247887
16487	7888.7	18	0.0247542
16489	7888.75	18	0.0247265
16491	7888.8	18	0.0247783
16493	7888.85	18	0.0247041
16495	7888.9	18	0.0247317
16497	7888.95	18	0.0246708
16499	7889	18	0.0246787
16501	7889.05	18	0.0246793
16503	7889.1	18	0.0246741
16505	7889.15	18	0.0245731
16507	7889.2	18	0.0246191
16509	7889.25	18	0.0246239
16511	7889.3	18	0.0246096
16513	7889.35	18	0.0246409
16515	7889.4	18	0.0246676
16517	7889.45	18	0.0246217
16519	7889.5	18	0.0246741
16521	7889.55	18	0.024764
16523	7889.6	18	0.0247057
16525	7889.65	18	0.0247656
16527	7889.7	18	0.0247571
16529	7889.75	18	0.0248024
16531	7889.8	18	0.0248822
16533	7889.85	18	0.0248578
16535	7889.9	18	0.0250219
16537	7889.95	18	0.0250398
16539	7890	18	0.0249818
16541	7890.05	18	0.0249942
16543	7890.1	18	0.0250496
16545	7890.15	18	0.0250271
16547	7890.2	18	0.0250333
16549	7890.25	18	0.0250665
16551	7890.3	18	0.025058
16553	7890.35	18	0.025032
16555	7890.4	18	0.0250056
16557	7890.45	18	0.0249268
16559	7890.5	18	0.0249913
16561	7890.55	18	0.0248933
16563	7890.6	18	0.0248382
16565	7890.65	18	0.0247734
16567	7890.7	18	0.0248174
16569	7890.75	18	0.0247705
16571	7890.8	18	0.0247415
16573	7890.85	18	0.0247311
16575	7890.9	18	0.024651
16577	7890.95	18	0.0246487
16579	7891	18	0.0246712
16581	7891.05	18	0.0246165
16583	7891.1	18	0.0245998
16585	7891.15	18	0.024524
16587	7891.2	18	0.0244487
16589	7891.25	18	0.0244836
16591	7891.3	18	0.0245236
16593	7891.35	18	0.0245474
16595	7891.4	18	0.0245259
16597	7891.45	18	0.0245715
16599	7891.5	18	0.024609
16601	7891.55	18	0.0246842
16603	7891.6	18	0.0246337
16605	7891.65	18	0.0245585
16607	7891.7	18	0.0245728
16609	7891.75	18	0.024567
16611	7891.8	18	0.0245132
16613	7891.85	18	0.0245406
16615	7891.9	18	0.0244592
16617	7891.95	18	0.0244794
16619	7892	18	0.0244849
16621	7892.05	18	0.0244862
16623	7892.1	18	0.0244386
16625	7892.15	18	0.0244667
16627	7892.2	18	0.0244722
16629	7892.25	18	0.0245305
16631	7892.3	18	0.0245543
16633	7892.35	18	0.0245044
16635	7892.4	18	0.0244781
16637	7892.45	18	0.0244474
16639	7892.5	18	0.0244523
16641	7892.55	18	0.0244009
16643	7892.6	18	0.0244185
16645	7892.65	18	0.0243813
16647	7892.7	18	0.0243712
16649	7892.75	18	0.0243162
16651	7892.8	18	0.0242341
16653	7892.85	18	0.0242012
16655	7892.9	18	0.024238
16657	7892.95	18	0.0241895
16659	7893	18	0.0242804
16661	7893.05	18	0.0242722
16663	7893.1	18	0.0242862
16665	7893.15	18	0.0242406
16667	7893.2	18	0.0242781
16669	7893.25	18	0.0241693
16671	7893.3	18	0.0242719
16673	7893.35	18	0.0241791
16675	7893.4	18	0.0242126
16677	7893.45	18	0.0241801
16679	7893.5	18	0.0241618
16681	7893.55	18	0.024185
16683	7893.6	18	0.0242592
16685	7893.65	18	0.0243673
16687	7893.7	18	0.0244022
16689	7893.75	18	0.0244172
16691	7893.8	18	0.0244624
16693	7893.85	18	0.0244478
16695	7893.9	18	0.0244334
16697	7893.95	18	0.0245464
16699	7894	18	0.0245598
16701	7894.05	18	0.0246148
16703	7894.1	18	0.024609
16705	7894.15	18	0.0246158
16707	7894.2	18	0.0246187
16709	7894.25	18	0.0246777
16711	7894.3	18	0.0246311
16713	7894.35	18	0.0245865
16715	7894.4	18	0.024549
16717	7894.45	18	0.0245744
16719	7894.5	18	0.0245718
16721	7894.55	18	0.0245162
16723	7894.6	18	0.0244654
16725	7894.65	18	0.0244429
16727	7894.7	18	0.0244751
16729	7894.75	18	0.0244106
16731	7894.8	18	0.0244025
16733	7894.85	18	0.0244142
16735	7894.9	18	0.0243605
16737	7894.95	18	0.0244172
16739	7895	18	0.0243953
16741	7895.05	18	0.0243856
16743	7895.1	18	0.0244846
16745	7895.15	18	0.0244943
16747	7895.2	18	0.0245236
16749	7895.25	18	0.0245269
16751	7895.3	18	0.0245204
16753	7895.35	18	0.0245416
16755	7895.4	18	0.0245318
16757	7895.45	18	0.0245767
16759	7895.5	18	0.0245774
16761	7895.55	18	0.0246546
16763	7895.6	18	0.0245409
16765	7895.65	18	0.0245422
16767	7895.7	18	0.0244836
16769	7895.75	18	0.0243732
16771	7895.8	18	0.0243862
16773	7895.85	18	0.0243826
16775	7895.9	18	0.0242983
16777	7895.95	18	0.0243328
16779	7896	18	0.0243256
16781	7896.05	18	0.0242354
16783	7896.1	18	0.0243032
16785	7896.15	18	0.0242709
16787	7896.2	18	0.0242488
16789	7896.25	18	0.0242602
16791	7896.3	18	0.0242507
16793	7896.35	18	0.0242602
16795	7896.4	18	0.0241879
16797	7896.45	18	0.0241964
16799	7896.5	18	0.0241729
16801	7896.55	18	0.0241657
16803	7896.6	18	0.0241534
16805	7896.65	18	0.0241075
16807	7896.7	18	0.0240674
16809	7896.75	18	0.0240368
16811	7896.8	18	0.0241322
16813	7896.85	18	0.0240948
16815	7896.9	18	0.0241589
16817	7896.95	18	0.0241384
16819	7897	18	0.0242074
16821	7897.05	18	0.0242231
16823	7897.1	18	0.0242452
16825	7897.15	18	0.0242843
16827	7897.2	18	0.0242452
16829	7897.25	18	0.0242576
16831	7897.3	18	0.024281
16833	7897.35	18	0.0242322
16835	7897.4	18	0.0242126
16837	7897.45	18	0.0243217
16839	7897.5	18	0.0244777
16841	7897.55	18	0.0244963
16843	7897.6	18	0.0245982
16845	7897.65	18	0.0246067
16847	7897.7	18	0.0246194
16849	7897.75	18	0.0246712
16851	7897.8	18	0.0247115
16853	7897.85	18	0.0246406
16855	7897.9	18	0.024663
16857	7897.95	18	0.024636
16859	7898	18	0.0247376
16861	7898.05	18	0.0248438
16863	7898.1	18	0.024778
16865	7898.15	18	0.0248972
16867	7898.2	18	0.0248418
16869	7898.25	18	0.0247734
16871	7898.3	18	0.0248092
16873	7898.35	18	0.0247558
16875	7898.4	18	0.0247487
16877	7898.45	18	0.0247568
16879	7898.5	18	0.0247412
16881	7898.55	18	0.0247044
16883	7898.6	18	0.0247181
16885	7898.65	18	0.0246467
16887	7898.7	18	0.0245451
16889	7898.75	18	0.024563
16891	7898.8	18	0.0245471
16893	7898.85	18	0.0244325
16895	7898.9	18	0.0244416
16897	7898.95	18	0.0244797
16899	7899	18	0.0244439
16901	7899.05	18	0.0244546
16903	7899.1	18	0.024425
16905	7899.15	18	0.0245477
16907	7899.2	18	0.0245777
16909	7899.25	18	0.0246266
16911	7899.3	18	0.0246383
16913	7899.35	18	0.0246366
16915	7899.4	18	0.0245236
16917	7899.45	18	0.0246344
16919	7899.5	18	0.0247161
16921	7899.55	18	0.0247174
16923	7899.6	18	0.0246764
16925	7899.65	18	0.0246627
16927	7899.7	18	0.0246298
16929	7899.75	18	0.0246204
16931	7899.8	18	0.0245604
16933	7899.85	18	0.0245331
16935	7899.9	18	0.0245259
16937	7899.95	18	0.0245116
[truncated: 15,001 more rows]

## Sheet: Mouse 2_Event Trials
4.18761e+07	11:37:56.0798208	7852.5	1	2021-12-22T11:37:56.0798208-06:00
4.20295e+07	11:40:29.4789376	8005.84	2	2021-12-22T11:40:29.4789376-06:00
4.21668e+07	11:42:46.7571584	8143.09	3	2021-12-22T11:42:46.7571584-06:00
4.22991e+07	11:44:59.0872064	8275.44	4	2021-12-22T11:44:59.0872064-06:00
4.25025e+07	11:48:22.5006592	8478.79	5	2021-12-22T11:48:22.5006592-06:00

## Sheet: Mouse 3_415
FrameCounter	Timestamp	Flags	Region0G
8734	11600	17	0.046768
8736	11600.1	17	0.0468156
8738	11600.1	17	0.0468009
8740	11600.2	17	0.0467895
8742	11600.2	17	0.0467905
8744	11600.3	17	0.0468292
8746	11600.3	17	0.0468537
8748	11600.4	17	0.0468178
8750	11600.4	17	0.046797
8752	11600.5	17	0.0468543
8754	11600.5	17	0.0468123
8756	11600.6	17	0.0467905
8758	11600.6	17	0.0467452
8760	11600.7	17	0.0467582
8762	11600.7	17	0.0467625
8764	11600.8	17	0.0467576
8766	11600.8	17	0.0467648
8768	11600.9	17	0.0468146
8770	11600.9	17	0.0467739
8772	11601	17	0.0466615
8774	11601	17	0.0466778
8776	11601.1	17	0.0466755
8778	11601.1	17	0.046726
8780	11601.2	17	0.0467514
8782	11601.2	17	0.0467009
8784	11601.3	17	0.0467039
8786	11601.3	17	0.0467315
8788	11601.4	17	0.0467612
8790	11601.4	17	0.046728
8792	11601.5	17	0.046728
8794	11601.5	17	0.0466902
8796	11601.6	17	0.0467306
8798	11601.6	17	0.0466957
8800	11601.7	17	0.0467358
8802	11601.7	17	0.0466765
8804	11601.8	17	0.0467104
8806	11601.8	17	0.0467198
8808	11601.9	17	0.0466443
8810	11601.9	17	0.0467244
8812	11602	17	0.0466827
8814	11602	17	0.0467016
8816	11602.1	17	0.04671
8818	11602.1	17	0.0466495
8820	11602.2	17	0.0466798
8822	11602.2	17	0.0466827
8824	11602.3	17	0.046699
8826	11602.3	17	0.0466706
8828	11602.4	17	0.0466853
8830	11602.4	17	0.046629
8832	11602.5	17	0.0466586
8834	11602.5	17	0.0466381
8836	11602.6	17	0.0465609
8838	11602.6	17	0.0466228
8840	11602.7	17	0.0465238
8842	11602.7	17	0.0465511
8844	11602.8	17	0.046541
8846	11602.8	17	0.0465755
8848	11602.9	17	0.046629
8850	11602.9	17	0.0466417
8852	11603	17	0.0466446
8854	11603	17	0.0466544
8856	11603.1	17	0.0465772
8858	11603.1	17	0.0465967
8860	11603.2	17	0.046613
8862	11603.2	17	0.0465733
8864	11603.3	17	0.0466176
8866	11603.3	17	0.0466224
8868	11603.4	17	0.046698
8870	11603.4	17	0.0466801
8872	11603.5	17	0.0466977
8874	11603.5	17	0.0467071
8876	11603.6	17	0.0466703
8878	11603.6	17	0.0466996
8880	11603.7	17	0.0466886
8882	11603.7	17	0.0466925
8884	11603.8	17	0.0466645
8886	11603.8	17	0.0466736
8888	11603.9	17	0.0466215
8890	11603.9	17	0.0466439
8892	11604	17	0.046613
8894	11604	17	0.0466631
8896	11604.1	17	0.0466439
8898	11604.1	17	0.0466163
8900	11604.2	17	0.0465681
8902	11604.2	17	0.0465843
8904	11604.3	17	0.0465446
8906	11604.3	17	0.0464824
8908	11604.4	17	0.0465534
8910	11604.4	17	0.0465182
8912	11604.5	17	0.046473
8914	11604.5	17	0.0464651
8916	11604.6	17	0.0465335
8918	11604.6	17	0.0465208
8920	11604.7	17	0.0465524
8922	11604.7	17	0.0464801
8924	11604.8	17	0.046569
8926	11604.8	17	0.0464857
8928	11604.9	17	0.0465374
8930	11604.9	17	0.0465443
8932	11605	17	0.0465202
8934	11605	17	0.0465046
8936	11605.1	17	0.0465612
8938	11605.1	17	0.0465143
8940	11605.2	17	0.0465798
8942	11605.2	17	0.046541
8944	11605.3	17	0.0464967
8946	11605.3	17	0.0466319
8948	11605.4	17	0.0465609
8950	11605.4	17	0.0465664
8952	11605.5	17	0.0465658
8954	11605.5	17	0.0465348
8956	11605.6	17	0.046527
8958	11605.6	17	0.0465482
8960	11605.7	17	0.0465176
8962	11605.7	17	0.0464792
8964	11605.8	17	0.0464935
8966	11605.8	17	0.0464365
8968	11605.9	17	0.0464749
8970	11605.9	17	0.0464069
8972	11606	17	0.0464746
8974	11606	17	0.0464541
8976	11606.1	17	0.0464267
8978	11606.1	17	0.0464541
8980	11606.2	17	0.0464446
8982	11606.2	17	0.0464573
8984	11606.3	17	0.0464222
8986	11606.3	17	0.046385
8988	11606.4	17	0.046388
8990	11606.4	17	0.0463802
8992	11606.5	17	0.0464577
8994	11606.5	17	0.0465231
8996	11606.6	17	0.0465427
8998	11606.6	17	0.0465511
9000	11606.7	17	0.046572
9002	11606.7	17	0.0465244
9004	11606.8	17	0.0465788
9006	11606.8	17	0.0465508
9008	11606.9	17	0.0466322
9010	11606.9	17	0.0465703
9012	11607	17	0.0465104
9014	11607	17	0.0465381
9016	11607.1	17	0.0465843
9018	11607.1	17	0.0464909
9020	11607.2	17	0.0466091
9022	11607.2	17	0.0465755
9024	11607.3	17	0.0465107
9026	11607.3	17	0.0465762
9028	11607.4	17	0.0465762
9030	11607.4	17	0.0465195
9032	11607.5	17	0.046445
9034	11607.5	17	0.046501
9036	11607.6	17	0.0464655
9038	11607.6	17	0.0464665
9040	11607.7	17	0.0465146
9042	11607.7	17	0.0465365
9044	11607.8	17	0.046516
9046	11607.8	17	0.0464922
9048	11607.9	17	0.0464456
9050	11607.9	17	0.0464691
9052	11608	17	0.0464472
9054	11608	17	0.0464371
9056	11608.1	17	0.0463857
9058	11608.1	17	0.046486
9060	11608.2	17	0.0464665
9062	11608.2	17	0.0464847
9064	11608.3	17	0.0464222
9066	11608.3	17	0.0464134
9068	11608.4	17	0.0464033
9070	11608.4	17	0.0464749
9072	11608.5	17	0.0463772
9074	11608.5	17	0.046431
9076	11608.6	17	0.0463984
9078	11608.6	17	0.0464547
9080	11608.7	17	0.0464541
9082	11608.7	17	0.0464593
9084	11608.8	17	0.0464785
9086	11608.8	17	0.0464538
9088	11608.9	17	0.0465098
9090	11608.9	17	0.0465482
9092	11609	17	0.0464511
9094	11609	17	0.0464941
9096	11609.1	17	0.0464922
9098	11609.1	17	0.046442
9100	11609.2	17	0.0465407
9102	11609.2	17	0.0465632
9104	11609.3	17	0.0465492
9106	11609.3	17	0.0466319
9108	11609.4	17	0.0465648
9110	11609.4	17	0.0466231
9112	11609.5	17	0.046615
9114	11609.5	17	0.0466133
9116	11609.6	17	0.046713
9118	11609.6	17	0.0467032
9120	11609.7	17	0.0467055
9122	11609.7	17	0.0466605
9124	11609.8	17	0.0465775
9126	11609.8	17	0.0466026
9128	11609.9	17	0.0465687
9130	11609.9	17	0.0465075
9132	11610	17	0.0464922
9134	11610	17	0.0465264
9136	11610.1	17	0.0464319
9138	11610.1	17	0.0464479
9140	11610.2	17	0.0463766
9142	11610.2	17	0.0463906
9144	11610.3	17	0.0463557
9146	11610.3	17	0.0463232
9148	11610.4	17	0.046417
9150	11610.4	17	0.0464007
9152	11610.5	17	0.0464248
9154	11610.5	17	0.0464212
9156	11610.6	17	0.0464642
9158	11610.6	17	0.0464622
9160	11610.7	17	0.0465329
9162	11610.7	17	0.046571
9164	11610.8	17	0.0465534
9166	11610.8	17	0.0465567
9168	11610.9	17	0.0465371
9170	11610.9	17	0.0465436
9172	11611	17	0.0465537
9174	11611	17	0.0465068
9176	11611.1	17	0.0465625
9178	11611.1	17	0.0465632
9180	11611.2	17	0.0464788
9182	11611.2	17	0.0464391
9184	11611.3	17	0.0464733
9186	11611.3	17	0.0464625
9188	11611.4	17	0.046358
9190	11611.4	17	0.0464352
9192	11611.5	17	0.0464297
9194	11611.5	17	0.0464137
9196	11611.6	17	0.0464642
9198	11611.6	17	0.0464098
9200	11611.7	17	0.0464069
9202	11611.7	17	0.0464681
9204	11611.8	17	0.046431
9206	11611.8	17	0.046385
9208	11611.9	17	0.0463453
9210	11611.9	17	0.0463456
9212	11612	17	0.0462958
9214	11612	17	0.0464202
9216	11612.1	17	0.0463619
9218	11612.1	17	0.0463987
9220	11612.2	17	0.0463805
9222	11612.2	17	0.0464469
9224	11612.3	17	0.0464117
9226	11612.3	17	0.0464111
9228	11612.4	17	0.0464143
9230	11612.4	17	0.0463593
9232	11612.5	17	0.0463964
9234	11612.5	17	0.0464082
9236	11612.6	17	0.0463534
9238	11612.6	17	0.0463499
9240	11612.7	17	0.04636
9242	11612.7	17	0.0463557
9244	11612.8	17	0.0463017
9246	11612.8	17	0.0463622
9248	11612.9	17	0.0463153
9250	11612.9	17	0.0463489
9252	11613	17	0.0463525
9254	11613	17	0.046303
9256	11613.1	17	0.0462831
9258	11613.1	17	0.0462606
9260	11613.2	17	0.0462414
9262	11613.2	17	0.046315
9264	11613.3	17	0.0463414
9266	11613.3	17	0.0463202
9268	11613.4	17	0.0463502
9270	11613.4	17	0.0462792
9272	11613.5	17	0.0463518
9274	11613.5	17	0.0463088
9276	11613.6	17	0.0463587
9278	11613.6	17	0.0463639
9280	11613.7	17	0.0463736
9282	11613.7	17	0.0463841
9284	11613.8	17	0.0464049
9286	11613.8	17	0.0464108
9288	11613.9	17	0.0464082
9290	11613.9	17	0.0464368
9292	11614	17	0.0463342
9294	11614	17	0.0463349
9296	11614.1	17	0.0463313
9298	11614.1	17	0.0463544
9300	11614.2	17	0.0462899
9302	11614.2	17	0.0463127
9304	11614.3	17	0.0462991
9306	11614.3	17	0.0463215
9308	11614.4	17	0.0463114
9310	11614.4	17	0.0463668
9312	11614.5	17	0.0463642
9314	11614.5	17	0.0463707
9316	11614.6	17	0.0462906
9318	11614.6	17	0.0462812
9320	11614.7	17	0.0462763
9322	11614.7	17	0.0462942
9324	11614.8	17	0.0462551
9326	11614.8	17	0.0462069
9328	11614.9	17	0.0462623
9330	11614.9	17	0.0461949
9332	11615	17	0.0462919
9334	11615	17	0.0462785
9336	11615.1	17	0.046247
9338	11615.1	17	0.0463675
9340	11615.2	17	0.0463889
9342	11615.2	17	0.0463297
9344	11615.3	17	0.0463619
9346	11615.3	17	0.0462971
9348	11615.4	17	0.0463137
9350	11615.4	17	0.0462896
9352	11615.5	17	0.0462883
9354	11615.5	17	0.0463183
9356	11615.6	17	0.0462737
9358	11615.6	17	0.0462385
9360	11615.7	17	0.0462365
9362	11615.7	17	0.0461988
9364	11615.8	17	0.0462294
9366	11615.8	17	0.0462802
9368	11615.9	17	0.0461795
9370	11615.9	17	0.0462385
9372	11616	17	0.0462251
9374	11616	17	0.0461633
9376	11616.1	17	0.0462014
9378	11616.1	17	0.0461597
9380	11616.2	17	0.0462023
9382	11616.2	17	0.0461962
9384	11616.3	17	0.0461265
9386	11616.3	17	0.0462079
9388	11616.4	17	0.0461724
9390	11616.4	17	0.046146
9392	11616.5	17	0.046217
9394	11616.5	17	0.0461239
9396	11616.6	17	0.04616
9398	11616.6	17	0.0461366
9400	11616.7	17	0.0461248
9402	11616.7	17	0.0462076
9404	11616.8	17	0.0462444
9406	11616.8	17	0.0462427
9408	11616.9	17	0.0462356
9410	11616.9	17	0.0462691
9412	11617	17	0.0462336
9414	11617	17	0.0462587
9416	11617.1	17	0.046162
9418	11617.1	17	0.0462173
9420	11617.2	17	0.0461226
9422	11617.2	17	0.0461968
9424	11617.3	17	0.04623
9426	11617.3	17	0.0461965
9428	11617.4	17	0.0462417
9430	11617.4	17	0.0462287
9432	11617.5	17	0.0461922
9434	11617.5	17	0.0462203
9436	11617.6	17	0.0462421
9438	11617.6	17	0.0461909
9440	11617.7	17	0.0462219
9442	11617.7	17	0.0462216
9444	11617.8	17	0.0461769
9446	11617.8	17	0.046132
9448	11617.9	17	0.0460698
9450	11617.9	17	0.0460473
9452	11618	17	0.0460174
9454	11618	17	0.0460682
9456	11618.1	17	0.0461082
9458	11618.1	17	0.0460988
9460	11618.2	17	0.0460669
9462	11618.2	17	0.0460939
9464	11618.3	17	0.0461317
9466	11618.3	17	0.0460236
9468	11618.4	17	0.0460874
9470	11618.4	17	0.045991
9472	11618.5	17	0.046031
9474	11618.5	17	0.0459832
9476	11618.6	17	0.0459916
9478	11618.6	17	0.0460359
9480	11618.7	17	0.0460672
9482	11618.7	17	0.0459946
9484	11618.8	17	0.0459786
9486	11618.8	17	0.0458979
9488	11618.9	17	0.0458812
9490	11618.9	17	0.0460229
9492	11619	17	0.0460711
9494	11619	17	0.0460538
9496	11619.1	17	0.0460187
9498	11619.1	17	0.0459715
9500	11619.2	17	0.0459868
9502	11619.2	17	0.0459431
9504	11619.3	17	0.0458767
9506	11619.3	17	0.0459734
9508	11619.4	17	0.0459171
9510	11619.4	17	0.0460092
9512	11619.5	17	0.045964
9514	11619.5	17	0.0459412
9516	11619.6	17	0.0459164
9518	11619.6	17	0.0459265
9520	11619.7	17	0.0458988
9522	11619.7	17	0.0458611
9524	11619.8	17	0.0458285
9526	11619.8	17	0.0458839
9528	11619.9	17	0.0457741
9530	11619.9	17	0.0460174
9532	11620	17	0.0460607
9534	11620	17	0.0461252
9536	11620.1	17	0.0461756
9538	11620.1	17	0.0461154
9540	11620.2	17	0.0460861
9542	11620.2	17	0.0461554
9544	11620.3	17	0.0461287
9546	11620.3	17	0.0461346
9548	11620.4	17	0.0460962
9550	11620.4	17	0.0460727
9552	11620.5	17	0.0460887
9554	11620.5	17	0.0460965
9556	11620.6	17	0.0460903
9558	11620.6	17	0.0460861
9560	11620.7	17	0.0460421
9562	11620.7	17	0.0461323
9564	11620.8	17	0.0461017
9566	11620.8	17	0.046046
9568	11620.9	17	0.0460431
9570	11620.9	17	0.046046
9572	11621	17	0.0460662
9574	11621	17	0.0460965
9576	11621.1	17	0.0460776
9578	11621.1	17	0.0460994
9580	11621.2	17	0.0460379
9582	11621.2	17	0.0460359
9584	11621.3	17	0.0461203
9586	11621.3	17	0.0461066
9588	11621.4	17	0.0461248
9590	11621.4	17	0.0461102
9592	11621.5	17	0.0460819
9594	11621.5	17	0.0461007
9596	11621.6	17	0.0461437
9598	11621.6	17	0.0460939
9600	11621.7	17	0.0460861
9602	11621.7	17	0.0461284
9604	11621.8	17	0.0460604
9606	11621.8	17	0.0460542
9608	11621.9	17	0.0460594
9610	11621.9	17	0.046074
9612	11622	17	0.0460558
9614	11622	17	0.0460086
9616	11622.1	17	0.0460604
9618	11622.1	17	0.0460464
9620	11622.2	17	0.0460434
9622	11622.2	17	0.0460464
9624	11622.3	17	0.0459975
9626	11622.3	17	0.0460236
9628	11622.4	17	0.0460929
9630	11622.4	17	0.0460698
9632	11622.5	17	0.0460092
9634	11622.5	17	0.0460001
9636	11622.6	17	0.0460128
9638	11622.6	17	0.0459281
9640	11622.7	17	0.0459646
9642	11622.7	17	0.0459574
9644	11622.8	17	0.0459851
9646	11622.8	17	0.0460245
9648	11622.9	17	0.0460587
9650	11622.9	17	0.0459855
9652	11623	17	0.0460574
9654	11623	17	0.0460473
9656	11623.1	17	0.0460574
9658	11623.1	17	0.0461248
9660	11623.2	17	0.0460832
9662	11623.2	17	0.0460428
9664	11623.3	17	0.0460913
9666	11623.3	17	0.0459581
9668	11623.4	17	0.0459666
9670	11623.4	17	0.0459001
9672	11623.5	17	0.0458952
9674	11623.5	17	0.0460034
9676	11623.6	17	0.0459607
9678	11623.6	17	0.0459812
9680	11623.7	17	0.0459561
9682	11623.7	17	0.0459591
9684	11623.8	17	0.0459926
9686	11623.8	17	0.0459408
9688	11623.9	17	0.0459819
9690	11623.9	17	0.046006
9692	11624	17	0.0459747
9694	11624	17	0.0460382
9696	11624.1	17	0.0460731
9698	11624.1	17	0.0460437
9700	11624.2	17	0.0460532
9702	11624.2	17	0.0460327
9704	11624.3	17	0.0460291
9706	11624.3	17	0.0460529
9708	11624.4	17	0.0460151
9710	11624.4	17	0.0459942
9712	11624.5	17	0.0460213
9714	11624.5	17	0.0460525
9716	11624.6	17	0.0460522
9718	11624.6	17	0.0460408
9720	11624.7	17	0.0459942
9722	11624.7	17	0.0461118
9724	11624.8	17	0.0460626
9726	11624.8	17	0.0461069
9728	11624.9	17	0.0460278
9730	11624.9	17	0.0460369
9732	11625	17	0.046089
9734	11625	17	0.0461027
9736	11625.1	17	0.0460473
9738	11625.1	17	0.046032
9740	11625.2	17	0.0460275
9742	11625.2	17	0.0460428
9744	11625.3	17	0.0460239
9746	11625.3	17	0.0460056
9748	11625.4	17	0.0460392
9750	11625.4	17	0.0460219
9752	11625.5	17	0.046032
9754	11625.5	17	0.0460711
9756	11625.6	17	0.0460314
9758	11625.6	17	0.0460382
9760	11625.7	17	0.0460206
9762	11625.7	17	0.0459815
9764	11625.8	17	0.0460376
9766	11625.8	17	0.0459675
9768	11625.9	17	0.046017
9770	11625.9	17	0.0460148
9772	11626	17	0.0459887
9774	11626	17	0.0460219
9776	11626.1	17	0.0459796
9778	11626.1	17	0.0460278
9780	11626.2	17	0.0460125
9782	11626.2	17	0.0459711
9784	11626.3	17	0.0460034
9786	11626.3	17	0.0459754
9788	11626.4	17	0.0459262
9790	11626.4	17	0.045922
9792	11626.5	17	0.0459076
9794	11626.5	17	0.0459763
9796	11626.6	17	0.0458998
9798	11626.6	17	0.0459285
9800	11626.7	17	0.0459379
9802	11626.7	17	0.0459115
9804	11626.8	17	0.0459454
9806	11626.8	17	0.0459353
9808	11626.9	17	0.0459477
9810	11626.9	17	0.0458679
9812	11627	17	0.0459431
9814	11627	17	0.0459822
9816	11627.1	17	0.0460021
9818	11627.1	17	0.0460483
9820	11627.2	17	0.0460099
9822	11627.2	17	0.04602
9824	11627.3	17	0.0460223
9826	11627.3	17	0.0459861
9828	11627.4	17	0.0461001
9830	11627.4	17	0.0460193
9832	11627.5	17	0.0460138
9834	11627.5	17	0.0460825
9836	11627.6	17	0.0460167
9838	11627.6	17	0.0459936
9840	11627.7	17	0.0460239
9842	11627.7	17	0.0460157
9844	11627.8	17	0.0459669
9846	11627.8	17	0.0459962
9848	11627.9	17	0.045947
9850	11627.9	17	0.0459203
9852	11628	17	0.0459268
9854	11628	17	0.0459763
9856	11628.1	17	0.0459903
9858	11628.1	17	0.046035
9860	11628.2	17	0.0459418
9862	11628.2	17	0.0459741
9864	11628.3	17	0.0459845
9866	11628.3	17	0.045947
9868	11628.4	17	0.0460268
9870	11628.4	17	0.0459519
9872	11628.5	17	0.0460073
9874	11628.5	17	0.0459617
9876	11628.6	17	0.0459509
9878	11628.6	17	0.0459965
9880	11628.7	17	0.0459229
9882	11628.7	17	0.0459545
9884	11628.8	17	0.0458946
9886	11628.8	17	0.0459516
9888	11628.9	17	0.0459623
9890	11628.9	17	0.0459822
9892	11629	17	0.0459802
9894	11629	17	0.045992
9896	11629.1	17	0.0459877
9898	11629.1	17	0.0459561
9900	11629.2	17	0.0460151
9902	11629.2	17	0.0459197
9904	11629.3	17	0.0459447
9906	11629.3	17	0.0459675
9908	11629.4	17	0.0459702
9910	11629.4	17	0.0459477
9912	11629.5	17	0.0459272
9914	11629.5	17	0.0459526
9916	11629.6	17	0.0459907
9918	11629.6	17	0.0459506
9920	11629.7	17	0.0459786
9922	11629.7	17	0.046005
9924	11629.8	17	0.0460157
9926	11629.8	17	0.0458793
9928	11629.9	17	0.0459174
9930	11629.9	17	0.0458767
9932	11630	17	0.0458353
9934	11630	17	0.0458936
9936	11630.1	17	0.0458982
9938	11630.1	17	0.0458738
9940	11630.2	17	0.0458923
9942	11630.2	17	0.0459246
9944	11630.3	17	0.0459099
9946	11630.3	17	0.0459763
9948	11630.4	17	0.0460451
9950	11630.4	17	0.0459845
9952	11630.5	17	0.0459539
9954	11630.5	17	0.0460376
9956	11630.6	17	0.0459122
9958	11630.6	17	0.0459731
9960	11630.7	17	0.0459408
9962	11630.7	17	0.0459291
9964	11630.8	17	0.0459353
9966	11630.8	17	0.0459757
9968	11630.9	17	0.0458757
9970	11630.9	17	0.0459301
9972	11631	17	0.0459347
9974	11631	17	0.0458581
9976	11631.1	17	0.0459731
9978	11631.1	17	0.0459662
9980	11631.2	17	0.0459431
9982	11631.2	17	0.0459363
9984	11631.3	17	0.0459493
9986	11631.3	17	0.0459542
9988	11631.4	17	0.0459008
9990	11631.4	17	0.0459591
9992	11631.5	17	0.045948
9994	11631.5	17	0.0458878
9996	11631.6	17	0.0458962
9998	11631.6	17	0.0459226
10000	11631.7	17	0.0458839
10002	11631.7	17	0.0459724
10004	11631.8	17	0.0459425
10006	11631.8	17	0.0459633
10008	11631.9	17	0.0459519
10010	11631.9	17	0.0459815
10012	11632	17	0.0459929
10014	11632	17	0.0459874
10016	11632.1	17	0.045935
10018	11632.1	17	0.0459311
10020	11632.2	17	0.0459395
10022	11632.2	17	0.0459998
10024	11632.3	17	0.0459526
10026	11632.3	17	0.0459073
10028	11632.4	17	0.0459588
10030	11632.4	17	0.045975
10032	11632.5	17	0.0459363
10034	11632.5	17	0.0459343
10036	11632.6	17	0.0459373
10038	11632.6	17	0.0459229
10040	11632.7	17	0.0459053
10042	11632.7	17	0.0458812
10044	11632.8	17	0.0458451
10046	11632.8	17	0.0458415
10048	11632.9	17	0.045819
10050	11632.9	17	0.0458581
10052	11633	17	0.045849
10054	11633	17	0.0458125
10056	11633.1	17	0.045807
10058	11633.1	17	0.045807
10060	11633.2	17	0.0457679
10062	11633.2	17	0.0458474
10064	11633.3	17	0.0458233
10066	11633.3	17	0.0458099
10068	11633.4	17	0.0458324
10070	11633.4	17	0.0457998
10072	11633.5	17	0.0457826
10074	11633.5	17	0.0458422
10076	11633.6	17	0.0458099
10078	11633.6	17	0.0458304
10080	11633.7	17	0.0457894
10082	11633.7	17	0.0457904
10084	11633.8	17	0.0457611
10086	11633.8	17	0.0457481
10088	11633.9	17	0.0458487
10090	11633.9	17	0.045935
10092	11634	17	0.0458308
10094	11634	17	0.0457621
10096	11634.1	17	0.0457494
10098	11634.1	17	0.0458063
10100	11634.2	17	0.0457656
10102	11634.2	17	0.0458721
10104	11634.3	17	0.0457819
10106	11634.3	17	0.0457914
10108	11634.4	17	0.0458243
10110	11634.4	17	0.0457461
10112	11634.5	17	0.0458503
10114	11634.5	17	0.0457738
10116	11634.6	17	0.0458708
10118	11634.6	17	0.0458044
10120	11634.7	17	0.0458809
10122	11634.7	17	0.0459653
10124	11634.8	17	0.0459421
10126	11634.8	17	0.0458861
10128	11634.9	17	0.0459236
10130	11634.9	17	0.0459096
10132	11635	17	0.0458555
10134	11635	17	0.0458259
10136	11635.1	17	0.0458298
10138	11635.1	17	0.0458591
10140	11635.2	17	0.0458562
10142	11635.2	17	0.0458155
10144	11635.3	17	0.0458363
10146	11635.3	17	0.0457878
10148	11635.4	17	0.0458112
10150	11635.4	17	0.0458073
10152	11635.5	17	0.0458246
10154	11635.5	17	0.0457884
10156	11635.6	17	0.0458226
10158	11635.6	17	0.04582
10160	11635.7	17	0.0458793
10162	11635.7	17	0.0458324
10164	11635.8	17	0.0458142
10166	11635.8	17	0.0458376
10168	11635.9	17	0.0458291
10170	11635.9	17	0.0458812
10172	11636	17	0.0458467
10174	11636	17	0.0458529
10176	11636.1	17	0.045806
10178	11636.1	17	0.0458138
10180	11636.2	17	0.0458637
10182	11636.2	17	0.0458523
10184	11636.3	17	0.0457868
10186	11636.3	17	0.0456793
10188	11636.4	17	0.0456445
10190	11636.4	17	0.0455882
10192	11636.5	17	0.0457363
10194	11636.5	17	0.0458552
10196	11636.6	17	0.0458497
10198	11636.6	17	0.0458868
10200	11636.7	17	0.0457829
10202	11636.7	17	0.0457415
10204	11636.8	17	0.0458884
10206	11636.8	17	0.0458995
10208	11636.9	17	0.0459187
10210	11636.9	17	0.0459005
10212	11637	17	0.045836
10214	11637	17	0.0458744
10216	11637.1	17	0.0458047
10218	11637.1	17	0.0458142
10220	11637.2	17	0.0458412
10222	11637.2	17	0.0458506
10224	11637.3	17	0.0457161
10226	11637.3	17	0.0457194
10228	11637.4	17	0.0457246
10230	11637.4	17	0.0457155
10232	11637.5	17	0.0458155
10234	11637.5	17	0.0457487
10236	11637.6	17	0.0457259
10238	11637.6	17	0.0457318
10240	11637.7	17	0.0456891
10242	11637.7	17	0.0456738
10244	11637.8	17	0.0456696
10246	11637.8	17	0.0456419
10248	11637.9	17	0.045637
10250	11637.9	17	0.0456666
10252	11638	17	0.0457077
10254	11638	17	0.0457503
10256	11638.1	17	0.0457461
10258	11638.1	17	0.0458086
10260	11638.2	17	0.0458041
10262	11638.2	17	0.0458285
10264	11638.3	17	0.0457572
10266	11638.3	17	0.0457347
10268	11638.4	17	0.0457783
10270	11638.4	17	0.0458057
10272	11638.5	17	0.0457354
10274	11638.5	17	0.0457025
10276	11638.6	17	0.045706
10278	11638.6	17	0.0457376
10280	11638.7	17	0.0457279
10282	11638.7	17	0.0457311
10284	11638.8	17	0.0456982
10286	11638.8	17	0.0457484
10288	11638.9	17	0.045722
10290	11638.9	17	0.0457122
10292	11639	17	0.0456982
10294	11639	17	0.0456416
10296	11639.1	17	0.0456487
10298	11639.1	17	0.0457067
10300	11639.2	17	0.0457523
10302	11639.2	17	0.0457279
10304	11639.3	17	0.0456624
10306	11639.3	17	0.0456963
10308	11639.4	17	0.0456959
10310	11639.4	17	0.0457516
10312	11639.5	17	0.0457318
10314	11639.5	17	0.0457894
10316	11639.6	17	0.0458148
10318	11639.6	17	0.0458249
10320	11639.7	17	0.0458493
10322	11639.7	17	0.0458177
10324	11639.8	17	0.0458275
10326	11639.8	17	0.045865
10328	11639.9	17	0.0458611
10330	11639.9	17	0.0458298
10332	11640	17	0.0457461
10334	11640	17	0.0457585
10336	11640.1	17	0.0457122
10338	11640.1	17	0.0457445
10340	11640.2	17	0.0457901
10342	11640.2	17	0.045779
10344	11640.3	17	0.0458076
10346	11640.3	17	0.0457777
10348	11640.4	17	0.0457588
10350	11640.4	17	0.0456979
10352	11640.5	17	0.0456992
10354	11640.5	17	0.0456728
10356	11640.6	17	0.0455869
10358	11640.6	17	0.0456474
10360	11640.7	17	0.0456839
10362	11640.7	17	0.045722
10364	11640.8	17	0.0456865
10366	11640.8	17	0.0457575
10368	11640.9	17	0.0457946
10370	11640.9	17	0.0457285
10372	11641	17	0.0457533
10374	11641	17	0.0457266
10376	11641.1	17	0.0457438
10378	11641.1	17	0.0457796
10380	11641.2	17	0.045722
10382	11641.2	17	0.0456849
10384	11641.3	17	0.0456764
10386	11641.3	17	0.0456911
10388	11641.4	17	0.0456562
10390	11641.4	17	0.0455781
10392	11641.5	17	0.0455904
10394	11641.5	17	0.0455028
10396	11641.6	17	0.0455598
10398	11641.6	17	0.0455969
10400	11641.7	17	0.0454918
10402	11641.7	17	0.0455448
10404	11641.8	17	0.0455566
10406	11641.8	17	0.0455611
10408	11641.9	17	0.0456064
10410	11641.9	17	0.0455618
10412	11642	17	0.0456113
10414	11642	17	0.0455621
10416	11642.1	17	0.0455305
10418	11642.1	17	0.0456031
10420	11642.2	17	0.0455683
10422	11642.2	17	0.0455836
10424	11642.3	17	0.0455628
10426	11642.3	17	0.0455582
10428	11642.4	17	0.0455654
10430	11642.4	17	0.0455937
10432	11642.5	17	0.0455842
10434	11642.5	17	0.045567
10436	11642.6	17	0.0455168
10438	11642.6	17	0.045554
10440	11642.7	17	0.0455751
10442	11642.7	17	0.0456012
10444	11642.8	17	0.0455553
10446	11642.8	17	0.0456005
10448	11642.9	17	0.045525
10450	11642.9	17	0.0456165
10452	11643	17	0.0455484
10454	11643	17	0.0455416
10456	11643.1	17	0.0455826
10458	11643.1	17	0.0455181
10460	11643.2	17	0.0455224
10462	11643.2	17	0.0455611
10464	11643.3	17	0.0455364
10466	11643.3	17	0.0456136
10468	11643.4	17	0.0455631
10470	11643.4	17	0.0455588
10472	11643.5	17	0.045552
10474	11643.5	17	0.0455614
10476	11643.6	17	0.0455911
10478	11643.6	17	0.0455478
10480	11643.7	17	0.0456259
10482	11643.7	17	0.0455689
10484	11643.8	17	0.0455986
10486	11643.8	17	0.0455305
10488	11643.9	17	0.0455803
10490	11643.9	17	0.0455481
10492	11644	17	0.0455982
10494	11644	17	0.0455969
10496	11644.1	17	0.0456425
10498	11644.1	17	0.0455413
10500	11644.2	17	0.0455693
10502	11644.2	17	0.0455689
10504	11644.3	17	0.0455953
10506	11644.3	17	0.0456152
10508	11644.4	17	0.0455761
10510	11644.4	17	0.0456324
10512	11644.5	17	0.0456354
10514	11644.5	17	0.0455836
10516	11644.6	17	0.0456399
10518	11644.6	17	0.0455549
10520	11644.7	17	0.0455803
10522	11644.7	17	0.0455579
10524	11644.8	17	0.0455501
10526	11644.8	17	0.0456119
10528	11644.9	17	0.0455768
10530	11644.9	17	0.0455474
10532	11645	17	0.0455461
10534	11645	17	0.0455549
10536	11645.1	17	0.0455702
10538	11645.1	17	0.0455448
10540	11645.2	17	0.0456223
10542	11645.2	17	0.0455556
10544	11645.3	17	0.0455422
10546	11645.3	17	0.0455468
10548	11645.4	17	0.045625
10550	11645.4	17	0.0455647
10552	11645.5	17	0.0456191
10554	11645.5	17	0.0455693
10556	11645.6	17	0.0456064
10558	11645.6	17	0.0455836
10560	11645.7	17	0.045635
10562	11645.7	17	0.0456181
10564	11645.8	17	0.0456435
10566	11645.8	17	0.0456702
10568	11645.9	17	0.0456448
10570	11645.9	17	0.0456842
10572	11646	17	0.0456992
10574	11646	17	0.0457256
10576	11646.1	17	0.0457494
10578	11646.1	17	0.0457122
10580	11646.2	17	0.0457546
10582	11646.2	17	0.045722
10584	11646.3	17	0.0456797
10586	11646.3	17	0.0457015
10588	11646.4	17	0.0456745
10590	11646.4	17	0.0456676
10592	11646.5	17	0.0457227
10594	11646.5	17	0.0456259
10596	11646.6	17	0.0456337
10598	11646.6	17	0.0456145
10600	11646.7	17	0.0456233
10602	11646.7	17	0.0456575
10604	11646.8	17	0.0456149
10606	11646.8	17	0.0456057
10608	11646.9	17	0.0456223
10610	11646.9	17	0.0456318
10612	11647	17	0.0456061
10614	11647	17	0.0457021
10616	11647.1	17	0.0456331
10618	11647.1	17	0.0456898
10620	11647.2	17	0.0456194
10622	11647.2	17	0.0456152
10624	11647.3	17	0.0455911
10626	11647.3	17	0.0455133
10628	11647.4	17	0.0455579
10630	11647.4	17	0.0455507
10632	11647.5	17	0.0456067
10634	11647.5	17	0.0456461
10636	11647.6	17	0.0456764
10638	11647.6	17	0.0457191
10640	11647.7	17	0.0457021
10642	11647.7	17	0.0456709
10644	11647.8	17	0.0456644
10646	11647.8	17	0.0455982
10648	11647.9	17	0.0455784
10650	11647.9	17	0.0455149
10652	11648	17	0.0455155
10654	11648	17	0.0454198
10656	11648.1	17	0.0455012
10658	11648.1	17	0.0455527
10660	11648.2	17	0.0455152
10662	11648.2	17	0.0455012
10664	11648.3	17	0.0454781
10666	11648.3	17	0.045551
10668	11648.4	17	0.0455325
10670	11648.4	17	0.0455224
10672	11648.5	17	0.0454905
10674	11648.5	17	0.0455321
10676	11648.6	17	0.0455194
10678	11648.6	17	0.0455146
10680	11648.7	17	0.0454892
10682	11648.7	17	0.0455452
10684	11648.8	17	0.0455986
10686	11648.8	17	0.0455041
10688	11648.9	17	0.045455
10690	11648.9	17	0.0455403
10692	11649	17	0.045536
10694	11649	17	0.0455051
10696	11649.1	17	0.0455159
10698	11649.1	17	0.04551
10700	11649.2	17	0.0455637
10702	11649.2	17	0.0454996
10704	11649.3	17	0.0455168
10706	11649.3	17	0.0455051
10708	11649.4	17	0.0455009
10710	11649.4	17	0.045565
10712	11649.5	17	0.0455914
10714	11649.5	17	0.0455562
10716	11649.6	17	0.0455875
10718	11649.6	17	0.045596
10720	11649.7	17	0.0455536
10722	11649.7	17	0.0455882
10724	11649.8	17	0.0456005
10726	11649.8	17	0.0455347
10728	11649.9	17	0.0456237
10730	11649.9	17	0.0455758
10732	11650	17	0.0456344
10734	11650	17	0.0456487
10736	11650.1	17	0.0456429
10738	11650.1	17	0.0456425
10740	11650.2	17	0.0455168
10742	11650.2	17	0.0455917
10744	11650.3	17	0.0455566
10746	11650.3	17	0.0455833
10748	11650.4	17	0.0455273
10750	11650.4	17	0.0455247
10752	11650.5	17	0.0455292
10754	11650.5	17	0.045481
10756	11650.6	17	0.0455129
10758	11650.6	17	0.0455419
10760	11650.7	17	0.0455126
10762	11650.7	17	0.0455338
10764	11650.8	17	0.045482
10766	11650.8	17	0.045566
10768	11650.9	17	0.0455175
10770	11650.9	17	0.0454468
10772	11651	17	0.0455374
10774	11651	17	0.0454791
10776	11651.1	17	0.0454872
10778	11651.1	17	0.0454237
10780	11651.2	17	0.0454191
10782	11651.2	17	0.0454618
10784	11651.3	17	0.0454484
10786	11651.3	17	0.0455175
10788	11651.4	17	0.04544
10790	11651.4	17	0.0454546
10792	11651.5	17	0.0454387
10794	11651.5	17	0.0453941
10796	11651.6	17	0.0454322
10798	11651.6	17	0.0454673
10800	11651.7	17	0.045469
10802	11651.7	17	0.045466
10804	11651.8	17	0.0454374
10806	11651.8	17	0.0454468
10808	11651.9	17	0.0453941
10810	11651.9	17	0.0454198
10812	11652	17	0.0454374
10814	11652	17	0.0454217
10816	11652.1	17	0.045368
10818	11652.1	17	0.0453247
10820	11652.2	17	0.0453296
10822	11652.2	17	0.0453573
10824	11652.3	17	0.0453833
10826	11652.3	17	0.0454058
10828	11652.4	17	0.0453302
10830	11652.4	17	0.0453683
10832	11652.5	17	0.0453804
10834	11652.5	17	0.0453592
10836	11652.6	17	0.0453179
10838	11652.6	17	0.0453814
10840	11652.7	17	0.0453807
10842	11652.7	17	0.0453481
10844	11652.8	17	0.045355
10846	11652.8	17	0.0453729
10848	11652.9	17	0.0454198
10850	11652.9	17	0.04537
10852	11653	17	0.0453035
10854	11653	17	0.0453012
10856	11653.1	17	0.0452775
10858	11653.1	17	0.0452986
10860	11653.2	17	0.0453153
10862	11653.2	17	0.0453175
10864	11653.3	17	0.0453039
10866	11653.3	17	0.0452745
10868	11653.4	17	0.0452202
10870	11653.4	17	0.0452166
10872	11653.5	17	0.0453058
10874	11653.5	17	0.0453113
10876	11653.6	17	0.0452745
10878	11653.6	17	0.0452254
10880	11653.7	17	0.0452791
10882	11653.7	17	0.0452433
10884	11653.8	17	0.0453397
10886	11653.8	17	0.0453439
10888	11653.9	17	0.0453592
10890	11653.9	17	0.0453902
10892	11654	17	0.0453934
10894	11654	17	0.0453468
10896	11654.1	17	0.0453407
10898	11654.1	17	0.0454084
10900	11654.2	17	0.0454227
10902	11654.2	17	0.0454276
10904	11654.3	17	0.0454286
10906	11654.3	17	0.0454344
10908	11654.4	17	0.0454908
10910	11654.4	17	0.0454865
10912	11654.5	17	0.045425
10914	11654.5	17	0.0453722
10916	11654.6	17	0.0453833
10918	11654.6	17	0.0454185
10920	11654.7	17	0.0453892
10922	11654.7	17	0.045438
10924	11654.8	17	0.0454403
10926	11654.8	17	0.0453905
10928	11654.9	17	0.0453654
10930	11654.9	17	0.0453569
10932	11655	17	0.0453579
10934	11655	17	0.0453853
10936	11655.1	17	0.0453306
10938	11655.1	17	0.0453016
10940	11655.2	17	0.0452846
10942	11655.2	17	0.0453143
10944	11655.3	17	0.045355
10946	11655.3	17	0.0453615
10948	11655.4	17	0.0452993
10950	11655.4	17	0.0453739
10952	11655.5	17	0.0453481
10954	11655.5	17	0.0453309
10956	11655.6	17	0.0453612
10958	11655.6	17	0.0453921
10960	11655.7	17	0.0454283
10962	11655.7	17	0.0454309
10964	11655.8	17	0.0454732
10966	11655.8	17	0.0454045
10968	11655.9	17	0.0453657
10970	11655.9	17	0.0454266
10972	11656	17	0.0454247
10974	11656	17	0.0453745
10976	11656.1	17	0.0453351
10978	11656.1	17	0.0453504
10980	11656.2	17	0.0453748
10982	11656.2	17	0.0453514
10984	11656.3	17	0.0453521
10986	11656.3	17	0.0453742
10988	11656.4	17	0.0453478
10990	11656.4	17	0.0453491
10992	11656.5	17	0.0453351
10994	11656.5	17	0.0453263
10996	11656.6	17	0.0453237
10998	11656.6	17	0.0453286
11000	11656.7	17	0.0453644
11002	11656.7	17	0.0453159
11004	11656.8	17	0.0452772
11006	11656.8	17	0.0453218
11008	11656.9	17	0.045284
11010	11656.9	17	0.045268
11012	11657	17	0.0453195
11014	11657	17	0.0453113
11016	11657.1	17	0.0452951
11018	11657.1	17	0.0453651
11020	11657.2	17	0.045338
11022	11657.2	17	0.0453667
11024	11657.3	17	0.0453589
11026	11657.3	17	0.0453735
11028	11657.4	17	0.0454344
11030	11657.4	17	0.0453706
11032	11657.5	17	0.045381
11034	11657.5	17	0.0454087
11036	11657.6	17	0.0453602
11038	11657.6	17	0.0453061
11040	11657.7	17	0.045313
11042	11657.7	17	0.045255
11044	11657.8	17	0.0452801
11046	11657.8	17	0.0453032
11048	11657.9	17	0.0452758
11050	11657.9	17	0.0453501
11052	11658	17	0.0453674
11054	11658	17	0.0453599
11056	11658.1	17	0.0453354
11058	11658.1	17	0.0452928
11060	11658.2	17	0.0452592
11062	11658.2	17	0.04514
11064	11658.3	17	0.0451954
11066	11658.3	17	0.0450967
11068	11658.4	17	0.0451218
11070	11658.4	17	0.0450508
11072	11658.5	17	0.0450824
11074	11658.5	17	0.0449798
11076	11658.6	17	0.0450632
11078	11658.6	17	0.0451016
11080	11658.7	17	0.0452413
11082	11658.7	17	0.0452208
11084	11658.8	17	0.0452517
11086	11658.8	17	0.0452475
11088	11658.9	17	0.0452726
11090	11658.9	17	0.0452817
11092	11659	17	0.0452273
11094	11659	17	0.0452544
11096	11659.1	17	0.0452433
11098	11659.1	17	0.0452335
11100	11659.2	17	0.045229
11102	11659.2	17	0.0452999
11104	11659.3	17	0.0452938
11106	11659.3	17	0.0452557
11108	11659.4	17	0.0452058
11110	11659.4	17	0.0452202
11112	11659.5	17	0.045184
11114	11659.5	17	0.0452322
11116	11659.6	17	0.0452342
11118	11659.6	17	0.0451863
11120	11659.7	17	0.0452348
11122	11659.7	17	0.0452348
11124	11659.8	17	0.0452029
11126	11659.8	17	0.0452527
11128	11659.9	17	0.045255
11130	11659.9	17	0.0452312
11132	11660	17	0.0452032
11134	11660	17	0.0452146
11136	11660.1	17	0.04524
11138	11660.1	17	0.0452114
11140	11660.2	17	0.0451749
11142	11660.2	17	0.045184
11144	11660.3	17	0.0451479
11146	11660.3	17	0.045156
11148	11660.4	17	0.0451866
11150	11660.4	17	0.0451801
11152	11660.5	17	0.0452462
11154	11660.5	17	0.0452729
11156	11660.6	17	0.0452726
11158	11660.6	17	0.0452355
11160	11660.7	17	0.0452413
11162	11660.7	17	0.0452078
11164	11660.8	17	0.0452156
11166	11660.8	17	0.0452859
11168	11660.9	17	0.0452397
11170	11660.9	17	0.0452899
11172	11661	17	0.0452635
11174	11661	17	0.0452977
11176	11661.1	17	0.0452462
11178	11661.1	17	0.0453306
11180	11661.2	17	0.0452934
11182	11661.2	17	0.0452609
11184	11661.3	17	0.0452967
11186	11661.3	17	0.0452592
11188	11661.4	17	0.0452325
11190	11661.4	17	0.0452182
11192	11661.5	17	0.0452022
11194	11661.5	17	0.0452404
11196	11661.6	17	0.0451746
11198	11661.6	17	0.0452254
11200	11661.7	17	0.04514
11202	11661.7	17	0.0452029
11204	11661.8	17	0.0451668
11206	11661.8	17	0.045084
11208	11661.9	17	0.0451837
11210	11661.9	17	0.045158
11212	11662	17	0.045142
11214	11662	17	0.0451352
11216	11662.1	17	0.0451681
11218	11662.1	17	0.0451013
11220	11662.2	17	0.0451632
11222	11662.2	17	0.0451775
11224	11662.3	17	0.045186
11226	11662.3	17	0.045169
11228	11662.4	17	0.0452127
11230	11662.4	17	0.0451687
11232	11662.5	17	0.04514
11234	11662.5	17	0.0451273
11236	11662.6	17	0.0452091
11238	11662.6	17	0.0451622
11240	11662.7	17	0.0451283
11242	11662.7	17	0.0451772
11244	11662.8	17	0.0451863
11246	11662.8	17	0.0451273
11248	11662.9	17	0.045172
11250	11662.9	17	0.0451834
11252	11663	17	0.0451931
11254	11663	17	0.0451944
11256	11663.1	17	0.0451567
11258	11663.1	17	0.0452215
11260	11663.2	17	0.0452364
11262	11663.2	17	0.0452058
11264	11663.3	17	0.0452859
11266	11663.3	17	0.0451856
11268	11663.4	17	0.0452029
11270	11663.4	17	0.0451622
11272	11663.5	17	0.0451925
11274	11663.5	17	0.0451801
11276	11663.6	17	0.0451091
11278	11663.6	17	0.0451967
11280	11663.7	17	0.0451352
11282	11663.7	17	0.0451648
11284	11663.8	17	0.0450889
11286	11663.8	17	0.0451006
11288	11663.9	17	0.045155
11290	11663.9	17	0.0451186
11292	11664	17	0.0451469
11294	11664	17	0.0451277
11296	11664.1	17	0.0451361
11298	11664.1	17	0.0451742
11300	11664.2	17	0.0451339
11302	11664.2	17	0.0451635
11304	11664.3	17	0.0451352
11306	11664.3	17	0.0451615
11308	11664.4	17	0.0452166
11310	11664.4	17	0.0452013
11312	11664.5	17	0.0451593
11314	11664.5	17	0.0451541
11316	11664.6	17	0.045142
11318	11664.6	17	0.0451313
11320	11664.7	17	0.0451352
11322	11664.7	17	0.0451466
11324	11664.8	17	0.0451371
11326	11664.8	17	0.045184
11328	11664.9	17	0.045113
11330	11664.9	17	0.0451348
11332	11665	17	0.0451381
11334	11665	17	0.0451384
11336	11665.1	17	0.0451384
11338	11665.1	17	0.0452091
11340	11665.2	17	0.0451075
11342	11665.2	17	0.0451348
11344	11665.3	17	0.0451156
11346	11665.3	17	0.045112
11348	11665.4	17	0.0450765
11350	11665.4	17	0.0450954
11352	11665.5	17	0.045169
11354	11665.5	17	0.0451619
11356	11665.6	17	0.0450811
11358	11665.6	17	0.045112
11360	11665.7	17	0.0450919
11362	11665.7	17	0.0450306
11364	11665.8	17	0.0450919
11366	11665.8	17	0.0449938
11368	11665.9	17	0.0449746
11370	11665.9	17	0.0450111
11372	11666	17	0.045013
11374	11666	17	0.0449785
11376	11666.1	17	0.0450371
11378	11666.1	17	0.0451085
11380	11666.2	17	0.0451179
11382	11666.2	17	0.0450967
11384	11666.3	17	0.045126
11386	11666.3	17	0.0451036
11388	11666.4	17	0.0450557
11390	11666.4	17	0.0450567
11392	11666.5	17	0.0450599
11394	11666.5	17	0.045013
11396	11666.6	17	0.0450261
11398	11666.6	17	0.0450192
11400	11666.7	17	0.0449756
11402	11666.7	17	0.0450029
11404	11666.8	17	0.0449694
11406	11666.8	17	0.0450303
11408	11666.9	17	0.0450345
11410	11666.9	17	0.0450218
11412	11667	17	0.0449938
11414	11667	17	0.0449779
11416	11667.1	17	0.0449645
11418	11667.1	17	0.0449088
11420	11667.2	17	0.0450075
11422	11667.2	17	0.0449489
11424	11667.3	17	0.0450143
11426	11667.3	17	0.0449834
11428	11667.4	17	0.0449645
11430	11667.4	17	0.044985
11432	11667.5	17	0.0449919
11434	11667.5	17	0.0449232
11436	11667.6	17	0.0450397
11438	11667.6	17	0.0450091
11440	11667.7	17	0.044988
11442	11667.7	17	0.045028
11444	11667.8	17	0.0449466
11446	11667.8	17	0.044944
11448	11667.9	17	0.0450557
11450	11667.9	17	0.0450593
11452	11668	17	0.0450603
11454	11668	17	0.0449896
11456	11668.1	17	0.044987
11458	11668.1	17	0.0449414
11460	11668.2	17	0.0449515
11462	11668.2	17	0.0449779
11464	11668.3	17	0.0449867
11466	11668.3	17	0.0449876
11468	11668.4	17	0.0450671
11470	11668.4	17	0.0450183
11472	11668.5	17	0.0450375
11474	11668.5	17	0.0450726
11476	11668.6	17	0.0450801
11478	11668.6	17	0.045056
11480	11668.7	17	0.0450671
11482	11668.7	17	0.0450678
11484	11668.8	17	0.0451117
11486	11668.8	17	0.0451036
11488	11668.9	17	0.0450336
11490	11668.9	17	0.0450283
11492	11669	17	0.0450515
11494	11669	17	0.0450678
11496	11669.1	17	0.0450638
11498	11669.1	17	0.0450818
11500	11669.2	17	0.0451065
11502	11669.2	17	0.0451264
11504	11669.3	17	0.0450987
11506	11669.3	17	0.0451427
11508	11669.4	17	0.0451339
11510	11669.4	17	0.0451466
11512	11669.5	17	0.0451195
11514	11669.5	17	0.0450795
11516	11669.6	17	0.0450772
11518	11669.6	17	0.0450938
11520	11669.7	17	0.0450521
11522	11669.7	17	0.0450297
11524	11669.8	17	0.0450619
11526	11669.8	17	0.0450814
11528	11669.9	17	0.0450967
11530	11669.9	17	0.0450805
11532	11670	17	0.0450687
11534	11670	17	0.0451166
11536	11670.1	17	0.0451023
11538	11670.1	17	0.0451534
11540	11670.2	17	0.0451498
11542	11670.2	17	0.0451371
11544	11670.3	17	0.0451765
11546	11670.3	17	0.0451729
11548	11670.4	17	0.0452029
11550	11670.4	17	0.0451889
11552	11670.5	17	0.0451635
11554	11670.5	17	0.0451371
11556	11670.6	17	0.0451811
11558	11670.6	17	0.0451671
11560	11670.7	17	0.0452036
11562	11670.7	17	0.0451918
11564	11670.8	17	0.0451765
11566	11670.8	17	0.0451208
11568	11670.9	17	0.0451514
11570	11670.9	17	0.0451241
11572	11671	17	0.0451081
11574	11671	17	0.0450244
11576	11671.1	17	0.0450039
11578	11671.1	17	0.0449596
11580	11671.2	17	0.0449222
11582	11671.2	17	0.04483
11584	11671.3	17	0.0447926
11586	11671.3	17	0.0447336
11588	11671.4	17	0.0447294
11590	11671.4	17	0.0447401
11592	11671.5	17	0.0447681
11594	11671.5	17	0.0446262
11596	11671.6	17	0.0447336
11598	11671.6	17	0.0447457
11600	11671.7	17	0.0445799
11602	11671.7	17	0.0447268
11604	11671.8	17	0.0447222
11606	11671.8	17	0.0445487
11608	11671.9	17	0.0446379
11610	11671.9	17	0.0447242
11612	11672	17	0.044433
11614	11672	17	0.0445724
11616	11672.1	17	0.0446617
11618	11672.1	17	0.0443806
11620	11672.2	17	0.0445529
11622	11672.2	17	0.0446832
11624	11672.3	17	0.0445167
11626	11672.3	17	0.0445894
11628	11672.4	17	0.0446799
11630	11672.4	17	0.0444383
11632	11672.5	17	0.0445636
11634	11672.5	17	0.0446792
11636	11672.6	17	0.0444418
11638	11672.6	17	0.0445382
11640	11672.7	17	0.0446646
11642	11672.7	17	0.0446529
11644	11672.8	17	0.0446369
11646	11672.8	17	0.0446499
11648	11672.9	17	0.0446698
11650	11672.9	17	0.0447147
11652	11673	17	0.0447043
11654	11673	17	0.0446923
11656	11673.1	17	0.0445203
11658	11673.1	17	0.0444992
11660	11673.2	17	0.0446604
11662	11673.2	17	0.0445656
11664	11673.3	17	0.0444594
11666	11673.3	17	0.0447815
11668	11673.4	17	0.0448531
11670	11673.4	17	0.0448163
11672	11673.5	17	0.0448141
11674	11673.5	17	0.0449137
11676	11673.6	17	0.0447571
11678	11673.6	17	0.04473
11680	11673.7	17	0.0447447
11682	11673.7	17	0.0447629
11684	11673.8	17	0.0446128
11686	11673.8	17	0.04486
11688	11673.9	17	0.0448346
11690	11673.9	17	0.0447844
11692	11674	17	0.0447844
11694	11674	17	0.0447554
11696	11674.1	17	0.0447164
11698	11674.1	17	0.0447388
11700	11674.2	17	0.0446734
11702	11674.2	17	0.0447033
11704	11674.3	17	0.044717
11706	11674.3	17	0.044631
11708	11674.4	17	0.0447893
11710	11674.4	17	0.0447802
11712	11674.5	17	0.0448492
11714	11674.5	17	0.0448079
11716	11674.6	17	0.0447802
11718	11674.6	17	0.0446333
11720	11674.7	17	0.044718
11722	11674.7	17	0.0446923
11724	11674.8	17	0.0446744
11726	11674.8	17	0.0446864
11728	11674.9	17	0.0446464
11730	11674.9	17	0.0446959
11732	11675	17	0.0447115
11734	11675	17	0.0447307
11736	11675.1	17	0.0447854
11738	11675.1	17	0.0446278
11740	11675.2	17	0.0447662
11742	11675.2	17	0.0447242
11744	11675.3	17	0.0446649
11746	11675.3	17	0.0447033
11748	11675.4	17	0.0446522
11750	11675.4	17	0.0446314
11752	11675.5	17	0.0446998
11754	11675.5	17	0.0446587
11756	11675.6	17	0.0447356
11758	11675.6	17	0.0447717
11760	11675.7	17	0.0447157
11762	11675.7	17	0.0446932
11764	11675.8	17	0.0446737
11766	11675.8	17	0.0446408
11768	11675.9	17	0.0447108
11770	11675.9	17	0.0447105
11772	11676	17	0.0446955
11774	11676	17	0.0447379
11776	11676.1	17	0.0447138
11778	11676.1	17	0.0447427
11780	11676.2	17	0.0447258
11782	11676.2	17	0.0447532
11784	11676.3	17	0.0447867
11786	11676.3	17	0.0447037
11788	11676.4	17	0.0447375
11790	11676.4	17	0.0447229
11792	11676.5	17	0.0447271
11794	11676.5	17	0.0447053
11796	11676.6	17	0.0447196
11798	11676.6	17	0.0447226
11800	11676.7	17	0.0448036
11802	11676.7	17	0.0447649
11804	11676.8	17	0.0447818
11806	11676.8	17	0.0448111
11808	11676.9	17	0.0447577
11810	11676.9	17	0.044815
11812	11677	17	0.0447913
11814	11677	17	0.0447574
11816	11677.1	17	0.0447955
11818	11677.1	17	0.0448554
11820	11677.2	17	0.0448128
11822	11677.2	17	0.0448466
11824	11677.3	17	0.0448632
11826	11677.3	17	0.0449043
11828	11677.4	17	0.0449082
11830	11677.4	17	0.0448935
11832	11677.5	17	0.0449248
11834	11677.5	17	0.0449427
11836	11677.6	17	0.0449407
11838	11677.6	17	0.0449893
11840	11677.7	17	0.0449456
11842	11677.7	17	0.0449945
11844	11677.8	17	0.0450257
11846	11677.8	17	0.044973
11848	11677.9	17	0.0450176
11850	11677.9	17	0.0450948
11852	11678	17	0.0450427
11854	11678	17	0.0450749
11856	11678.1	17	0.0451208
11858	11678.1	17	0.0451264
11860	11678.2	17	0.0451537
11862	11678.2	17	0.0451186
11864	11678.3	17	0.0451671
11866	11678.3	17	0.0452716
11868	11678.4	17	0.0451892
11870	11678.4	17	0.045197
11872	11678.5	17	0.045226
11874	11678.5	17	0.0452863
11876	11678.6	17	0.045325
11878	11678.6	17	0.0453315
11880	11678.7	17	0.0453192
11882	11678.7	17	0.0453387
11884	11678.8	17	0.0453247
11886	11678.8	17	0.045314
11888	11678.9	17	0.045298
11890	11678.9	17	0.0452941
11892	11679	17	0.0452485
11894	11679	17	0.0452651
11896	11679.1	17	0.0451733
11898	11679.1	17	0.045156
11900	11679.2	17	0.0450358
11902	11679.2	17	0.0450932
11904	11679.3	17	0.0450948
11906	11679.3	17	0.0450368
11908	11679.4	17	0.045042
11910	11679.4	17	0.0450401
11912	11679.5	17	0.0449896
11914	11679.5	17	0.0450215
11916	11679.6	17	0.0450176
11918	11679.6	17	0.0450186
11920	11679.7	17	0.045045
11922	11679.7	17	0.0450489
11924	11679.8	17	0.0449616
11926	11679.8	17	0.04493
11928	11679.9	17	0.0449609
11930	11679.9	17	0.0449675
11932	11680	17	0.0450036
11934	11680	17	0.0449987
11936	11680.1	17	0.045057
11938	11680.1	17	0.0450039
11940	11680.2	17	0.0450283
11942	11680.2	17	0.0450622
11944	11680.3	17	0.0450368
11946	11680.3	17	0.0450638
11948	11680.4	17	0.0451153
11950	11680.4	17	0.0450697
11952	11680.5	17	0.0451023
11954	11680.5	17	0.0450638
11956	11680.6	17	0.0449837
11958	11680.6	17	0.0450717
11960	11680.7	17	0.0450502
11962	11680.7	17	0.0450199
11964	11680.8	17	0.0450059
11966	11680.8	17	0.0450352
11968	11680.9	17	0.0450365
11970	11680.9	17	0.0449648
11972	11681	17	0.0450042
11974	11681	17	0.0450212
11976	11681.1	17	0.0449964
11978	11681.1	17	0.0449675
11980	11681.2	17	0.0449577
11982	11681.2	17	0.0449723
11984	11681.3	17	0.0449098
11986	11681.3	17	0.0449352
11988	11681.4	17	0.0448961
11990	11681.4	17	0.0449434
11992	11681.5	17	0.0449772
11994	11681.5	17	0.0448694
11996	11681.6	17	0.0449714
11998	11681.6	17	0.0449938
12000	11681.7	17	0.0449902
12002	11681.7	17	0.0449648
12004	11681.8	17	0.0449909
12006	11681.8	17	0.0449534
12008	11681.9	17	0.0450277
12010	11681.9	17	0.0450453
12012	11682	17	0.0450345
12014	11682	17	0.044986
12016	11682.1	17	0.0450251
12018	11682.1	17	0.0450586
12020	11682.2	17	0.0450029
12022	11682.2	17	0.0450355
12024	11682.3	17	0.0450339
12026	11682.3	17	0.0450222
12028	11682.4	17	0.0450091
12030	11682.4	17	0.0450524
12032	11682.5	17	0.0449525
12034	11682.5	17	0.0449613
12036	11682.6	17	0.0448893
12038	11682.6	17	0.0448955
12040	11682.7	17	0.0448616
12042	11682.7	17	0.0448658
12044	11682.8	17	0.0448007
12046	11682.8	17	0.0448447
12048	11682.9	17	0.0447965
12050	11682.9	17	0.0448251
12052	11683	17	0.0448711
12054	11683	17	0.0448483
12056	11683.1	17	0.0448557
12058	11683.1	17	0.0448199
12060	11683.2	17	0.0448144
12062	11683.2	17	0.0448808
12064	11683.3	17	0.0448183
12066	11683.3	17	0.0448199
12068	11683.4	17	0.0447851
12070	11683.4	17	0.0448531
12072	11683.5	17	0.0448063
12074	11683.5	17	0.0448258
12076	11683.6	17	0.044887
12078	11683.6	17	0.0448714
12080	11683.7	17	0.0448264
12082	11683.7	17	0.0448883
12084	11683.8	17	0.0448795
12086	11683.8	17	0.0448766
12088	11683.9	17	0.0448398
12090	11683.9	17	0.04483
12092	11684	17	0.0448567
12094	11684	17	0.0448652
12096	11684.1	17	0.0448978
12098	11684.1	17	0.0448512
12100	11684.2	17	0.0448948
12102	11684.2	17	0.0448193
12104	11684.3	17	0.0448417
12106	11684.3	17	0.0448925
12108	11684.4	17	0.0448671
12110	11684.4	17	0.0449066
12112	11684.5	17	0.0448606
12114	11684.5	17	0.0448564
12116	11684.6	17	0.044886
12118	11684.6	17	0.044845
12120	11684.7	17	0.0448759
12122	11684.7	17	0.0448877
12124	11684.8	17	0.0449199
12126	11684.8	17	0.0448619
12128	11684.9	17	0.0449153
12130	11684.9	17	0.044889
12132	11685	17	0.0449329
12134	11685	17	0.0448727
12136	11685.1	17	0.0449401
12138	11685.1	17	0.0448623
12140	11685.2	17	0.0449173
12142	11685.2	17	0.0449336
12144	11685.3	17	0.0449287
12146	11685.3	17	0.044875
12148	11685.4	17	0.0450098
12150	11685.4	17	0.044957
12152	11685.5	17	0.0449388
12154	11685.5	17	0.0449323
12156	11685.6	17	0.0449082
12158	11685.6	17	0.0448636
12160	11685.7	17	0.0448597
12162	11685.7	17	0.044903
12164	11685.8	17	0.0449951
12166	11685.8	17	0.0448564
12168	11685.9	17	0.0448688
12170	11685.9	17	0.0448916
12172	11686	17	0.0448128
12174	11686	17	0.0447737
12176	11686.1	17	0.0448649
12178	11686.1	17	0.0446988
12180	11686.2	17	0.0447284
12182	11686.2	17	0.0447594
12184	11686.3	17	0.0447281
12186	11686.3	17	0.0447141
12188	11686.4	17	0.0446363
12190	11686.4	17	0.0446675
12192	11686.5	17	0.0446818
12194	11686.5	17	0.0447362
12196	11686.6	17	0.0447079
12198	11686.6	17	0.044717
12200	11686.7	17	0.04473
12202	11686.7	17	0.0447079
12204	11686.8	17	0.0447629
12206	11686.8	17	0.0446571
12208	11686.9	17	0.0447773
12210	11686.9	17	0.0447756
12212	11687	17	0.0447509
12214	11687	17	0.0447704
12216	11687.1	17	0.0448147
12218	11687.1	17	0.0447522
12220	11687.2	17	0.0447861
12222	11687.2	17	0.044774
12224	11687.3	17	0.0447929
12226	11687.3	17	0.0447965
12228	11687.4	17	0.0447991
12230	11687.4	17	0.0448212
12232	11687.5	17	0.0448658
12234	11687.5	17	0.044816
12236	11687.6	17	0.0448561
12238	11687.6	17	0.0448375
12240	11687.7	17	0.0448294
12242	11687.7	17	0.0448766
12244	11687.8	17	0.0448147
12246	11687.8	17	0.0448369
12248	11687.9	17	0.0447678
12250	11687.9	17	0.044872
12252	11688	17	0.0448548
12254	11688	17	0.0447838
12256	11688.1	17	0.0447851
12258	11688.1	17	0.0447512
12260	11688.2	17	0.0447958
12262	11688.2	17	0.0447916
12264	11688.3	17	0.0448437
12266	11688.3	17	0.0447708
12268	11688.4	17	0.0448502
12270	11688.4	17	0.0448027
12272	11688.5	17	0.0448561
12274	11688.5	17	0.0448137
12276	11688.6	17	0.0448186
12278	11688.6	17	0.0448489
12280	11688.7	17	0.0448206
12282	11688.7	17	0.0448395
12284	11688.8	17	0.0448076
12286	11688.8	17	0.044815
12288	11688.9	17	0.0448369
12290	11688.9	17	0.0448815
12292	11689	17	0.0448163
12294	11689	17	0.0448877
12296	11689.1	17	0.0448626
12298	11689.1	17	0.0448095
12300	11689.2	17	0.0448437
12302	11689.2	17	0.0448352
12304	11689.3	17	0.0448414
12306	11689.3	17	0.0448303
12308	11689.4	17	0.0448463
12310	11689.4	17	0.0448528
12312	11689.5	17	0.0448049
12314	11689.5	17	0.0447808
12316	11689.6	17	0.044873
12318	11689.6	17	0.0448522
12320	11689.7	17	0.0448411
12322	11689.7	17	0.0448434
12324	11689.8	17	0.044816
12326	11689.8	17	0.0447975
12328	11689.9	17	0.0447708
12330	11689.9	17	0.0447483
12332	11690	17	0.0448147
12334	11690	17	0.0447747
12336	11690.1	17	0.0447138
12338	11690.1	17	0.0447568
12340	11690.2	17	0.0447086
12342	11690.2	17	0.0447382
12344	11690.3	17	0.0446434
12346	11690.3	17	0.0446812
12348	11690.4	17	0.044691
12350	11690.4	17	0.0446727
12352	11690.5	17	0.0446496
12354	11690.5	17	0.0446711
12356	11690.6	17	0.0446457
12358	11690.6	17	0.0446818
12360	11690.7	17	0.0446854
12362	11690.7	17	0.0446141
12364	11690.8	17	0.0446509
12366	11690.8	17	0.0446278
12368	11690.9	17	0.0446343
12370	11690.9	17	0.0447082
12372	11691	17	0.0446639
12374	11691	17	0.0446239
12376	11691.1	17	0.0447017
12378	11691.1	17	0.044677
12380	11691.2	17	0.0446822
12382	11691.2	17	0.0447079
12384	11691.3	17	0.0446402
12386	11691.3	17	0.0447327
12388	11691.4	17	0.0447356
12390	11691.4	17	0.0447356
12392	11691.5	17	0.0446952
12394	11691.5	17	0.0447434
12396	11691.6	17	0.0447278
12398	11691.6	17	0.0447291
12400	11691.7	17	0.0447046
12402	11691.7	17	0.0447392
12404	11691.8	17	0.0447734
12406	11691.8	17	0.0448417
12408	11691.9	17	0.0448466
12410	11691.9	17	0.0448203
12412	11692	17	0.0447587
12414	11692	17	0.0448007
12416	11692.1	17	0.0447812
12418	11692.1	17	0.0448492
12420	11692.2	17	0.0447626
12422	11692.2	17	0.0447909
12424	11692.3	17	0.0447835
12426	11692.3	17	0.0447561
12428	11692.4	17	0.0446932
12430	11692.4	17	0.0447095
12432	11692.5	17	0.0446265
12434	11692.5	17	0.0446183
12436	11692.6	17	0.0446252
12438	11692.6	17	0.0446268
12440	11692.7	17	0.0445799
12442	11692.7	17	0.0446297
12444	11692.8	17	0.044618
12446	11692.8	17	0.0446154
12448	11692.9	17	0.0445874
12450	11692.9	17	0.0445405
12452	11693	17	0.0446923
12454	11693	17	0.044663
12456	11693.1	17	0.0446789
12458	11693.1	17	0.0447121
12460	11693.2	17	0.0446942
12462	11693.2	17	0.0447082
12464	11693.3	17	0.0447297
12466	11693.3	17	0.0447134
12468	11693.4	17	0.0447232
12470	11693.4	17	0.04466
12472	11693.5	17	0.0447258
12474	11693.5	17	0.0447258
12476	11693.6	17	0.0446822
12478	11693.6	17	0.0447317
12480	11693.7	17	0.0447372
12482	11693.7	17	0.0447203
12484	11693.8	17	0.0447584
12486	11693.8	17	0.0447138
12488	11693.9	17	0.0446923
12490	11693.9	17	0.044746
12492	11694	17	0.0447134
12494	11694	17	0.0447151
12496	11694.1	17	0.0447278
12498	11694.1	17	0.044761
12500	11694.2	17	0.0446893
12502	11694.2	17	0.0446763
12504	11694.3	17	0.0447105
12506	11694.3	17	0.0446906
12508	11694.4	17	0.0447112
12510	11694.4	17	0.0447245
12512	11694.5	17	0.0447033
12514	11694.5	17	0.044734
12516	11694.6	17	0.0446841
12518	11694.6	17	0.0446454
12520	11694.7	17	0.0446558
12522	11694.7	17	0.0446359
12524	11694.8	17	0.0446626
12526	11694.8	17	0.044621
12528	11694.9	17	0.044647
12530	11694.9	17	0.0446177
12532	11695	17	0.0446213
12534	11695	17	0.044633
12536	11695.1	17	0.0446464
12538	11695.1	17	0.0446167
12540	11695.2	17	0.0446473
12542	11695.2	17	0.0446454
12544	11695.3	17	0.0446128
12546	11695.3	17	0.04449
12548	11695.4	17	0.0444952
12550	11695.4	17	0.0445978
12552	11695.5	17	0.0445548
12554	11695.5	17	0.0445438
12556	11695.6	17	0.044603
12558	11695.6	17	0.0445415
12560	11695.7	17	0.0446125
12562	11695.7	17	0.0446379
12564	11695.8	17	0.0445868
12566	11695.8	17	0.0446333
12568	11695.9	17	0.044603
12570	11695.9	17	0.0445845
12572	11696	17	0.044619
12574	11696	17	0.0445337
12576	11696.1	17	0.0445822
12578	11696.1	17	0.0445933
12580	11696.2	17	0.0445073
12582	11696.2	17	0.0445444
12584	11696.3	17	0.0444536
12586	11696.3	17	0.0445066
12588	11696.4	17	0.0444666
12590	11696.4	17	0.0444506
12592	11696.5	17	0.0444601
12594	11696.5	17	0.0444832
12596	11696.6	17	0.0445119
12598	11696.6	17	0.0444611
12600	11696.7	17	0.0444878
12602	11696.7	17	0.044535
12604	11696.8	17	0.0445083
12606	11696.8	17	0.0445555
12608	11696.9	17	0.044522
12610	11696.9	17	0.0445578
12612	11697	17	0.0445584
12614	11697	17	0.0446216
12616	11697.1	17	0.0445913
12618	11697.1	17	0.0446092
12620	11697.2	17	0.0445434
12622	11697.2	17	0.0445373
12624	11697.3	17	0.0444676
12626	11697.3	17	0.0445526
12628	11697.4	17	0.0444933
12630	11697.4	17	0.0445757
12632	11697.5	17	0.0445438
12634	11697.5	17	0.044548
12636	11697.6	17	0.0445881
12638	11697.6	17	0.0445763
12640	11697.7	17	0.0445311
12642	11697.7	17	0.0446053
12644	11697.8	17	0.0445343
12646	11697.8	17	0.044635
12648	11697.9	17	0.0446402
12650	11697.9	17	0.0445802
12652	11698	17	0.0445679
12654	11698	17	0.0445916
12656	11698.1	17	0.0446239
12658	11698.1	17	0.0445933
12660	11698.2	17	0.0445835
12662	11698.2	17	0.0445614
12664	11698.3	17	0.0445838
12666	11698.3	17	0.044562
12668	11698.4	17	0.0445998
12670	11698.4	17	0.0446021
12672	11698.5	17	0.0445688
12674	11698.5	17	0.0445649
12676	11698.6	17	0.0445483
12678	11698.6	17	0.044575
12680	11698.7	17	0.0445542
12682	11698.7	17	0.0445418
12684	11698.8	17	0.044534
12686	11698.8	17	0.0445477
12688	11698.9	17	0.0445558
12690	11698.9	17	0.0445493
12692	11699	17	0.0445203
12694	11699	17	0.0445034
12696	11699.1	17	0.0445135
12698	11699.1	17	0.0444689
12700	11699.2	17	0.0445148
12702	11699.2	17	0.0445399
12704	11699.3	17	0.0444578
12706	11699.3	17	0.0445233
12708	11699.4	17	0.0444917
12710	11699.4	17	0.044534
12712	11699.5	17	0.0445236
12714	11699.5	17	0.0445135
12716	11699.6	17	0.0445298
12718	11699.6	17	0.0445285
12720	11699.7	17	0.0444822
12722	11699.7	17	0.0444894
12724	11699.8	17	0.0445281
12726	11699.8	17	0.0444972
12728	11699.9	17	0.0445148
12730	11699.9	17	0.0445223
[truncated: 15,602 more rows]

## Sheet: Mouse 3_470
FrameCounter	Timestamp	Flags	Region0G
8735	11600.1	18	0.0376506
8737	11600.1	18	0.0377297
8739	11600.2	18	0.0376701
8741	11600.2	18	0.0377108
8743	11600.3	18	0.0378372
8745	11600.3	18	0.0377457
8747	11600.4	18	0.0376805
8749	11600.4	18	0.03769
8751	11600.5	18	0.0376724
8753	11600.5	18	0.0376317
8755	11600.6	18	0.0375552
8757	11600.6	18	0.0375955
8759	11600.7	18	0.0375727
8761	11600.7	18	0.0376108
8763	11600.8	18	0.0376079
8765	11600.8	18	0.0376529
8767	11600.9	18	0.0376392
8769	11600.9	18	0.0377711
8771	11601	18	0.0377701
8773	11601	18	0.0377805
8775	11601.1	18	0.0377291
8777	11601.1	18	0.0378535
8779	11601.2	18	0.0378023
8781	11601.2	18	0.0377818
8783	11601.3	18	0.0377362
8785	11601.3	18	0.0376174
8787	11601.4	18	0.0376916
8789	11601.4	18	0.0376929
8791	11601.5	18	0.0376773
8793	11601.5	18	0.0377304
8795	11601.6	18	0.0376998
8797	11601.6	18	0.0377069
8799	11601.7	18	0.0378215
8801	11601.7	18	0.0377017
8803	11601.8	18	0.0377352
8805	11601.8	18	0.0376701
8807	11601.9	18	0.0376294
8809	11601.9	18	0.0375001
8811	11602	18	0.0376506
8813	11602	18	0.0376317
8815	11602.1	18	0.037549
8817	11602.1	18	0.0375057
8819	11602.2	18	0.0375617
8821	11602.2	18	0.037507
8823	11602.3	18	0.0375721
8825	11602.3	18	0.0375415
8827	11602.4	18	0.0375444
8829	11602.4	18	0.0377138
8831	11602.5	18	0.0377457
8833	11602.5	18	0.0377307
8835	11602.6	18	0.0376783
8837	11602.6	18	0.0377134
8839	11602.7	18	0.0376945
8841	11602.7	18	0.0377818
8843	11602.8	18	0.0376366
8845	11602.8	18	0.037562
8847	11602.9	18	0.0376382
8849	11602.9	18	0.0376851
8851	11603	18	0.0378001
8853	11603	18	0.0378222
8855	11603.1	18	0.0378629
8857	11603.1	18	0.0378789
8859	11603.2	18	0.0377968
8861	11603.2	18	0.0378284
8863	11603.3	18	0.037873
8865	11603.3	18	0.0377633
8867	11603.4	18	0.0377001
8869	11603.4	18	0.0376991
8871	11603.5	18	0.0376581
8873	11603.5	18	0.0376222
8875	11603.6	18	0.0375714
8877	11603.6	18	0.0376157
8879	11603.7	18	0.037633
8881	11603.7	18	0.0375115
8883	11603.8	18	0.0375444
8885	11603.8	18	0.037547
8887	11603.9	18	0.0375431
8889	11603.9	18	0.0375382
8891	11604	18	0.0375239
8893	11604	18	0.0374825
8895	11604.1	18	0.0374496
8897	11604.1	18	0.0375004
8899	11604.2	18	0.037421
8901	11604.2	18	0.0374073
8903	11604.3	18	0.0374106
8905	11604.3	18	0.0373754
8907	11604.4	18	0.0374392
8909	11604.4	18	0.0374604
8911	11604.5	18	0.0374181
8913	11604.5	18	0.037448
8915	11604.6	18	0.0374415
8917	11604.6	18	0.0374614
8919	11604.7	18	0.0373992
8921	11604.7	18	0.0374956
8923	11604.8	18	0.037521
8925	11604.8	18	0.0374913
8927	11604.9	18	0.0374969
8929	11604.9	18	0.0375496
8931	11605	18	0.0375959
8933	11605	18	0.0375998
8935	11605.1	18	0.0376682
8937	11605.1	18	0.0376574
8939	11605.2	18	0.037617
8941	11605.2	18	0.037592
8943	11605.3	18	0.0376021
8945	11605.3	18	0.0375786
8947	11605.4	18	0.0375698
8949	11605.4	18	0.0375884
8951	11605.5	18	0.0375317
8953	11605.5	18	0.0375187
8955	11605.6	18	0.0374858
8957	11605.6	18	0.0374659
8959	11605.7	18	0.0375053
8961	11605.7	18	0.0375444
8963	11605.8	18	0.0375239
8965	11605.8	18	0.0376128
8967	11605.9	18	0.0375789
8969	11605.9	18	0.0375363
8971	11606	18	0.037547
8973	11606	18	0.037491
8975	11606.1	18	0.0375226
8977	11606.1	18	0.0374838
8979	11606.2	18	0.037478
8981	11606.2	18	0.0375096
8983	11606.3	18	0.0375278
8985	11606.3	18	0.0376239
8987	11606.4	18	0.0375682
8989	11606.4	18	0.0375522
8991	11606.5	18	0.0376226
8993	11606.5	18	0.0375767
8995	11606.6	18	0.0375656
8997	11606.6	18	0.0374851
8999	11606.7	18	0.0374858
9001	11606.7	18	0.0375099
9003	11606.8	18	0.0375806
9005	11606.8	18	0.0375096
9007	11606.9	18	0.0375552
9009	11606.9	18	0.0375131
9011	11607	18	0.0375089
9013	11607	18	0.0374529
9015	11607.1	18	0.0374496
9017	11607.1	18	0.0374835
9019	11607.2	18	0.0374171
9021	11607.2	18	0.0374702
9023	11607.3	18	0.0374285
9025	11607.3	18	0.0374666
9027	11607.4	18	0.037506
9029	11607.4	18	0.0376037
9031	11607.5	18	0.0375317
9033	11607.5	18	0.0373826
9035	11607.6	18	0.0374213
9037	11607.6	18	0.0373441
9039	11607.7	18	0.0373923
9041	11607.7	18	0.0373526
9043	11607.8	18	0.0373353
9045	11607.8	18	0.0372826
9047	11607.9	18	0.037278
9049	11607.9	18	0.0372539
9051	11608	18	0.0372582
9053	11608	18	0.0372643
9055	11608.1	18	0.037181
9057	11608.1	18	0.0371693
9059	11608.2	18	0.0372572
9061	11608.2	18	0.0371631
9063	11608.3	18	0.0371839
9065	11608.3	18	0.0371852
9067	11608.4	18	0.0372679
9069	11608.4	18	0.0372481
9071	11608.5	18	0.0373467
9073	11608.5	18	0.0373142
9075	11608.6	18	0.0373503
9077	11608.6	18	0.0374272
9079	11608.7	18	0.0374516
9081	11608.7	18	0.0374304
9083	11608.8	18	0.0374604
9085	11608.8	18	0.0374861
9087	11608.9	18	0.037489
9089	11608.9	18	0.0374864
9091	11609	18	0.0375613
9093	11609	18	0.0375327
9095	11609.1	18	0.0374558
9097	11609.1	18	0.0374575
9099	11609.2	18	0.0374034
9101	11609.2	18	0.0373959
9103	11609.3	18	0.0374656
9105	11609.3	18	0.0374454
9107	11609.4	18	0.037463
9109	11609.4	18	0.0375073
9111	11609.5	18	0.0374877
9113	11609.5	18	0.0375226
9115	11609.6	18	0.0375395
9117	11609.6	18	0.0375796
9119	11609.7	18	0.0374978
9121	11609.7	18	0.0375004
9123	11609.8	18	0.0374848
9125	11609.8	18	0.0374702
9127	11609.9	18	0.0374985
9129	11609.9	18	0.0374913
9131	11610	18	0.0375135
9133	11610	18	0.0374493
9135	11610.1	18	0.0375034
9137	11610.1	18	0.0375317
9139	11610.2	18	0.0374868
9141	11610.2	18	0.0375395
9143	11610.3	18	0.0375314
9145	11610.3	18	0.0375503
9147	11610.4	18	0.037673
9149	11610.4	18	0.0376128
9151	11610.5	18	0.0376167
9153	11610.5	18	0.0376281
9155	11610.6	18	0.0376463
9157	11610.6	18	0.0376239
9159	11610.7	18	0.0376548
9161	11610.7	18	0.0375545
9163	11610.8	18	0.0375509
9165	11610.8	18	0.0375154
9167	11610.9	18	0.0374832
9169	11610.9	18	0.0374581
9171	11611	18	0.0374415
9173	11611	18	0.0375578
9175	11611.1	18	0.0375819
9177	11611.1	18	0.0374991
9179	11611.2	18	0.0374917
9181	11611.2	18	0.0373067
9183	11611.3	18	0.0373949
9185	11611.3	18	0.0374809
9187	11611.4	18	0.0375262
9189	11611.4	18	0.0375574
9191	11611.5	18	0.0375936
9193	11611.5	18	0.0375372
9195	11611.6	18	0.0375444
9197	11611.6	18	0.0375216
9199	11611.7	18	0.0375343
9201	11611.7	18	0.0375646
9203	11611.8	18	0.0376161
9205	11611.8	18	0.0376164
9207	11611.9	18	0.0376092
9209	11611.9	18	0.0376841
9211	11612	18	0.0376783
9213	11612	18	0.0376499
9215	11612.1	18	0.0375679
9217	11612.1	18	0.0375421
9219	11612.2	18	0.0375314
9221	11612.2	18	0.0376164
9223	11612.3	18	0.0376262
9225	11612.3	18	0.0375907
9227	11612.4	18	0.0376701
9229	11612.4	18	0.0377024
9231	11612.5	18	0.0377799
9233	11612.5	18	0.0377369
9235	11612.6	18	0.0377063
9237	11612.6	18	0.0377128
9239	11612.7	18	0.0376584
9241	11612.7	18	0.0375513
9243	11612.8	18	0.0375724
9245	11612.8	18	0.0375887
9247	11612.9	18	0.0376535
9249	11612.9	18	0.0376688
9251	11613	18	0.0376548
9253	11613	18	0.0376082
9255	11613.1	18	0.0376037
9257	11613.1	18	0.0376402
9259	11613.2	18	0.0376626
9261	11613.2	18	0.0376532
9263	11613.3	18	0.0376076
9265	11613.3	18	0.0377567
9267	11613.4	18	0.037604
9269	11613.4	18	0.0376493
9271	11613.5	18	0.0375929
9273	11613.5	18	0.0376118
9275	11613.6	18	0.0375851
9277	11613.6	18	0.037547
9279	11613.7	18	0.0375203
9281	11613.7	18	0.0375499
9283	11613.8	18	0.0375871
9285	11613.8	18	0.0376183
9287	11613.9	18	0.0376678
9289	11613.9	18	0.0376874
9291	11614	18	0.0377349
9293	11614	18	0.0377776
9295	11614.1	18	0.0377209
9297	11614.1	18	0.0376382
9299	11614.2	18	0.0375607
9301	11614.2	18	0.037563
9303	11614.3	18	0.0375314
9305	11614.3	18	0.0375506
9307	11614.4	18	0.0376962
9309	11614.4	18	0.0378095
9311	11614.5	18	0.0377971
9313	11614.5	18	0.0378499
9315	11614.6	18	0.0378222
9317	11614.6	18	0.0378307
9319	11614.7	18	0.0378847
9321	11614.7	18	0.0377646
9323	11614.8	18	0.037746
9325	11614.8	18	0.0378232
9327	11614.9	18	0.0377883
9329	11614.9	18	0.0378303
9331	11615	18	0.037846
9333	11615	18	0.0378929
9335	11615.1	18	0.037956
9337	11615.1	18	0.0379551
9339	11615.2	18	0.037943
9341	11615.2	18	0.0379554
9343	11615.3	18	0.0379017
9345	11615.3	18	0.0379932
9347	11615.4	18	0.0379261
9349	11615.4	18	0.0378707
9351	11615.5	18	0.0378176
9353	11615.5	18	0.0378694
9355	11615.6	18	0.0378655
9357	11615.6	18	0.0377776
9359	11615.7	18	0.0377724
9361	11615.7	18	0.0377457
9363	11615.8	18	0.0378896
9365	11615.8	18	0.0377916
9367	11615.9	18	0.0377369
9369	11615.9	18	0.0377874
9371	11616	18	0.0377063
9373	11616	18	0.0377961
9375	11616.1	18	0.0377636
9377	11616.1	18	0.0377717
9379	11616.2	18	0.0377929
9381	11616.2	18	0.0378541
9383	11616.3	18	0.0378258
9385	11616.3	18	0.0378525
9387	11616.4	18	0.0377447
9389	11616.4	18	0.0378899
9391	11616.5	18	0.0378264
9393	11616.5	18	0.0378238
9395	11616.6	18	0.0378938
9397	11616.6	18	0.0378828
9399	11616.7	18	0.0379603
9401	11616.7	18	0.0379661
9403	11616.8	18	0.0379453
9405	11616.8	18	0.037987
9407	11616.9	18	0.0379538
9409	11616.9	18	0.037971
9411	11617	18	0.0380095
9413	11617	18	0.0379316
9415	11617.1	18	0.0380316
9417	11617.1	18	0.0379319
9419	11617.2	18	0.0379134
9421	11617.2	18	0.0378652
9423	11617.3	18	0.0377988
9425	11617.3	18	0.0378525
9427	11617.4	18	0.0378115
9429	11617.4	18	0.0378271
9431	11617.5	18	0.0378408
9433	11617.5	18	0.0378665
9435	11617.6	18	0.0379613
9437	11617.6	18	0.038043
9439	11617.7	18	0.0379883
9441	11617.7	18	0.0378958
9443	11617.8	18	0.0379551
9445	11617.8	18	0.0378544
9447	11617.9	18	0.0378694
9449	11617.9	18	0.0378945
9451	11618	18	0.037845
9453	11618	18	0.0378268
9455	11618.1	18	0.0378684
9457	11618.1	18	0.037874
9459	11618.2	18	0.0378665
9461	11618.2	18	0.0378756
9463	11618.3	18	0.0378971
9465	11618.3	18	0.0378307
9467	11618.4	18	0.0378375
9469	11618.4	18	0.0378408
9471	11618.5	18	0.0378776
9473	11618.5	18	0.0378186
9475	11618.6	18	0.0378101
9477	11618.6	18	0.0378557
9479	11618.7	18	0.0378329
9481	11618.7	18	0.0378277
9483	11618.8	18	0.0378147
9485	11618.8	18	0.0377014
9487	11618.9	18	0.0376659
9489	11618.9	18	0.0375907
9491	11619	18	0.0376818
9493	11619	18	0.037648
9495	11619.1	18	0.0376646
9497	11619.1	18	0.0377284
9499	11619.2	18	0.03766
9501	11619.2	18	0.037633
9503	11619.3	18	0.0375796
9505	11619.3	18	0.0375675
9507	11619.4	18	0.0375975
9509	11619.4	18	0.0376659
9511	11619.5	18	0.0376213
9513	11619.5	18	0.0375887
9515	11619.6	18	0.0375301
9517	11619.6	18	0.0375317
9519	11619.7	18	0.0375636
9521	11619.7	18	0.037532
9523	11619.8	18	0.0375581
9525	11619.8	18	0.0375812
9527	11619.9	18	0.0375333
9529	11619.9	18	0.0376444
9531	11620	18	0.0375806
9533	11620	18	0.0376203
9535	11620.1	18	0.0375796
9537	11620.1	18	0.0375571
9539	11620.2	18	0.0376164
9541	11620.2	18	0.0375565
9543	11620.3	18	0.0376288
9545	11620.3	18	0.0376457
9547	11620.4	18	0.037549
9549	11620.4	18	0.0375294
9551	11620.5	18	0.0375245
9553	11620.5	18	0.0376245
9555	11620.6	18	0.0375376
9557	11620.6	18	0.0375936
9559	11620.7	18	0.0376203
9561	11620.7	18	0.0376408
9563	11620.8	18	0.0376089
9565	11620.8	18	0.0375887
9567	11620.9	18	0.0374734
9569	11620.9	18	0.0374578
9571	11621	18	0.0375076
9573	11621	18	0.0374246
9575	11621.1	18	0.037505
9577	11621.1	18	0.0375428
9579	11621.2	18	0.0375304
9581	11621.2	18	0.0375561
9583	11621.3	18	0.0375034
9585	11621.3	18	0.0374614
9587	11621.4	18	0.0374864
9589	11621.4	18	0.0374965
9591	11621.5	18	0.0375477
9593	11621.5	18	0.0375509
9595	11621.6	18	0.0375812
9597	11621.6	18	0.0376141
9599	11621.7	18	0.0375486
9601	11621.7	18	0.0376213
9603	11621.8	18	0.0375975
9605	11621.8	18	0.0376906
9607	11621.9	18	0.0377014
9609	11621.9	18	0.0376936
9611	11622	18	0.0377593
9613	11622	18	0.0377121
9615	11622.1	18	0.0375981
9617	11622.1	18	0.0376398
9619	11622.2	18	0.0376721
9621	11622.2	18	0.0376522
9623	11622.3	18	0.0376613
9625	11622.3	18	0.0376737
9627	11622.4	18	0.0376499
9629	11622.4	18	0.0377291
9631	11622.5	18	0.0376919
9633	11622.5	18	0.0376766
9635	11622.6	18	0.0377056
9637	11622.6	18	0.0376802
9639	11622.7	18	0.0377063
9641	11622.7	18	0.0376743
9643	11622.8	18	0.0376623
9645	11622.8	18	0.0376535
9647	11622.9	18	0.0375877
9649	11622.9	18	0.0376375
9651	11623	18	0.0376454
9653	11623	18	0.0376382
9655	11623.1	18	0.0376389
9657	11623.1	18	0.0375571
9659	11623.2	18	0.0376519
9661	11623.2	18	0.0376551
9663	11623.3	18	0.0376623
9665	11623.3	18	0.0376669
9667	11623.4	18	0.0374523
9669	11623.4	18	0.0376281
9671	11623.5	18	0.0376597
9673	11623.5	18	0.0376307
9675	11623.6	18	0.0376092
9677	11623.6	18	0.0375174
9679	11623.7	18	0.0375226
9681	11623.7	18	0.0375392
9683	11623.8	18	0.0375682
9685	11623.8	18	0.0375174
9687	11623.9	18	0.037546
9689	11623.9	18	0.0375389
9691	11624	18	0.0374894
9693	11624	18	0.0374607
9695	11624.1	18	0.037504
9697	11624.1	18	0.0374728
9699	11624.2	18	0.0374532
9701	11624.2	18	0.0374409
9703	11624.3	18	0.0374539
9705	11624.3	18	0.0376216
9707	11624.4	18	0.0375311
9709	11624.4	18	0.0376053
9711	11624.5	18	0.0375832
9713	11624.5	18	0.0375385
9715	11624.6	18	0.037561
9717	11624.6	18	0.0374633
9719	11624.7	18	0.0374972
9721	11624.7	18	0.0375369
9723	11624.8	18	0.0374956
9725	11624.8	18	0.0374998
9727	11624.9	18	0.037464
9729	11624.9	18	0.0374676
9731	11625	18	0.0374607
9733	11625	18	0.0374369
9735	11625.1	18	0.0374259
9737	11625.1	18	0.0373728
9739	11625.2	18	0.0373809
9741	11625.2	18	0.0373972
9743	11625.3	18	0.0373598
9745	11625.3	18	0.0374089
9747	11625.4	18	0.0373653
9749	11625.4	18	0.0373865
9751	11625.5	18	0.0373363
9753	11625.5	18	0.0373848
9755	11625.6	18	0.0373747
9757	11625.6	18	0.0374314
9759	11625.7	18	0.0374044
9761	11625.7	18	0.0373581
9763	11625.8	18	0.0374308
9765	11625.8	18	0.0374467
9767	11625.9	18	0.0374187
9769	11625.9	18	0.0374721
9771	11626	18	0.0374353
9773	11626	18	0.0374731
9775	11626.1	18	0.0374138
9777	11626.1	18	0.0375223
9779	11626.2	18	0.0375561
9781	11626.2	18	0.0374135
9783	11626.3	18	0.037379
9785	11626.3	18	0.0374021
9787	11626.4	18	0.0374327
9789	11626.4	18	0.037476
9791	11626.5	18	0.0374887
9793	11626.5	18	0.0374724
9795	11626.6	18	0.0375187
9797	11626.6	18	0.0375024
9799	11626.7	18	0.0375135
9801	11626.7	18	0.0375933
9803	11626.8	18	0.0375776
9805	11626.8	18	0.0375708
9807	11626.9	18	0.0375613
9809	11626.9	18	0.0375552
9811	11627	18	0.0374711
9813	11627	18	0.0374829
9815	11627.1	18	0.0374643
9817	11627.1	18	0.037574
9819	11627.2	18	0.0374054
9821	11627.2	18	0.037464
9823	11627.3	18	0.0373809
9825	11627.3	18	0.0374057
9827	11627.4	18	0.0374516
9829	11627.4	18	0.0373754
9831	11627.5	18	0.0373773
9833	11627.5	18	0.0373272
9835	11627.6	18	0.0372868
9837	11627.6	18	0.0372871
9839	11627.7	18	0.0372748
9841	11627.7	18	0.0372507
9843	11627.8	18	0.0372624
9845	11627.8	18	0.0372832
9847	11627.9	18	0.0372083
9849	11627.9	18	0.0372865
9851	11628	18	0.0372181
9853	11628	18	0.0372074
9855	11628.1	18	0.0371849
9857	11628.1	18	0.0371647
9859	11628.2	18	0.0372904
9861	11628.2	18	0.0372683
9863	11628.3	18	0.0373217
9865	11628.3	18	0.0372259
9867	11628.4	18	0.0371373
9869	11628.4	18	0.0371071
9871	11628.5	18	0.0371474
9873	11628.5	18	0.0370761
9875	11628.6	18	0.0371673
9877	11628.6	18	0.0370872
9879	11628.7	18	0.0371412
9881	11628.7	18	0.0371455
9883	11628.8	18	0.0371373
9885	11628.8	18	0.0371891
9887	11628.9	18	0.0371627
9889	11628.9	18	0.0371282
9891	11629	18	0.0371432
9893	11629	18	0.0370729
9895	11629.1	18	0.0370774
9897	11629.1	18	0.0371028
9899	11629.2	18	0.0370377
9901	11629.2	18	0.0370693
9903	11629.3	18	0.0371461
9905	11629.3	18	0.0370572
9907	11629.4	18	0.0370611
9909	11629.4	18	0.0370628
9911	11629.5	18	0.0369752
9913	11629.5	18	0.0369706
9915	11629.6	18	0.0369729
9917	11629.6	18	0.0369634
9919	11629.7	18	0.0369472
9921	11629.7	18	0.0369029
9923	11629.8	18	0.0369247
9925	11629.8	18	0.0369058
9927	11629.9	18	0.0370025
9929	11629.9	18	0.0370556
9931	11630	18	0.0370299
9933	11630	18	0.0370295
9935	11630.1	18	0.0370178
9937	11630.1	18	0.0369423
9939	11630.2	18	0.0369856
9941	11630.2	18	0.0370074
9943	11630.3	18	0.0370462
9945	11630.3	18	0.0370813
9947	11630.4	18	0.0371741
9949	11630.4	18	0.0370846
9951	11630.5	18	0.0371784
9953	11630.5	18	0.0372012
9955	11630.6	18	0.0370823
9957	11630.6	18	0.0371745
9959	11630.7	18	0.0371031
9961	11630.7	18	0.0371071
9963	11630.8	18	0.0371338
9965	11630.8	18	0.0371455
9967	11630.9	18	0.0371116
9969	11630.9	18	0.0371344
9971	11631	18	0.037139
9973	11631	18	0.0370856
9975	11631.1	18	0.0371145
9977	11631.1	18	0.0371149
9979	11631.2	18	0.0370768
9981	11631.2	18	0.0370641
9983	11631.3	18	0.037081
9985	11631.3	18	0.0370514
9987	11631.4	18	0.0370048
9989	11631.4	18	0.0369778
9991	11631.5	18	0.0370579
9993	11631.5	18	0.0369589
9995	11631.6	18	0.0369406
9997	11631.6	18	0.0369446
9999	11631.7	18	0.0369234
10001	11631.7	18	0.0370354
10003	11631.8	18	0.036899
10005	11631.8	18	0.036867
10007	11631.9	18	0.0369338
10009	11631.9	18	0.0369403
10011	11632	18	0.0370077
10013	11632	18	0.0369999
10015	11632.1	18	0.037096
10017	11632.1	18	0.0370751
10019	11632.2	18	0.0370777
10021	11632.2	18	0.0370859
10023	11632.3	18	0.0370774
10025	11632.3	18	0.0370452
10027	11632.4	18	0.0371139
10029	11632.4	18	0.0370843
10031	11632.5	18	0.0370849
10033	11632.5	18	0.0370624
10035	11632.6	18	0.0370494
10037	11632.6	18	0.0370471
10039	11632.7	18	0.0370315
10041	11632.7	18	0.0369989
10043	11632.8	18	0.0369318
10045	11632.8	18	0.0369084
10047	11632.9	18	0.0369097
10049	11632.9	18	0.0369455
10051	11633	18	0.0369914
10053	11633	18	0.0369804
10055	11633.1	18	0.036966
10057	11633.1	18	0.036969
10059	11633.2	18	0.0369465
10061	11633.2	18	0.0369318
10063	11633.3	18	0.0369237
10065	11633.3	18	0.0368895
10067	11633.4	18	0.0368553
10069	11633.4	18	0.0368677
10071	11633.5	18	0.0368928
10073	11633.5	18	0.0368081
10075	11633.6	18	0.0369009
10077	11633.6	18	0.0368967
10079	11633.7	18	0.0369797
10081	11633.7	18	0.0369869
10083	11633.8	18	0.0370175
10085	11633.8	18	0.0369742
10087	11633.9	18	0.03715
10089	11633.9	18	0.0374135
10091	11634	18	0.0373777
10093	11634	18	0.0373197
10095	11634.1	18	0.0368309
10097	11634.1	18	0.0366098
10099	11634.2	18	0.0364733
10101	11634.2	18	0.0368788
10103	11634.3	18	0.0367511
10105	11634.3	18	0.0368055
10107	11634.4	18	0.0368644
10109	11634.4	18	0.0367977
10111	11634.5	18	0.0368433
10113	11634.5	18	0.0368381
10115	11634.6	18	0.0368615
10117	11634.6	18	0.036853
10119	11634.7	18	0.0368078
10121	11634.7	18	0.0368573
10123	11634.8	18	0.0368091
10125	11634.8	18	0.0368426
10127	11634.9	18	0.0368579
10129	11634.9	18	0.0368133
10131	11635	18	0.0368797
10133	11635	18	0.0368999
10135	11635.1	18	0.0368244
10137	11635.1	18	0.0368589
10139	11635.2	18	0.0368664
10141	11635.2	18	0.0369016
10143	11635.3	18	0.036871
10145	11635.3	18	0.0368377
10147	11635.4	18	0.0367941
10149	11635.4	18	0.0368039
10151	11635.5	18	0.0368084
10153	11635.5	18	0.0367798
10155	11635.6	18	0.0367241
10157	11635.6	18	0.0367195
10159	11635.7	18	0.0367238
10161	11635.7	18	0.0366948
10163	11635.8	18	0.0366756
10165	11635.8	18	0.0366827
10167	11635.9	18	0.0366762
10169	11635.9	18	0.0367042
10171	11636	18	0.0367524
10173	11636	18	0.0367433
10175	11636.1	18	0.0368071
10177	11636.1	18	0.0368504
10179	11636.2	18	0.0367934
10181	11636.2	18	0.0368449
10183	11636.3	18	0.0369097
10185	11636.3	18	0.0368416
10187	11636.4	18	0.0366345
10189	11636.4	18	0.036586
10191	11636.5	18	0.0368224
10193	11636.5	18	0.0364929
10195	11636.6	18	0.0368498
10197	11636.6	18	0.036757
10199	11636.7	18	0.0367775
10201	11636.7	18	0.0366625
10203	11636.8	18	0.0366775
10205	11636.8	18	0.0366476
10207	11636.9	18	0.0366072
10209	11636.9	18	0.0365961
10211	11637	18	0.0367117
10213	11637	18	0.0366843
10215	11637.1	18	0.0367221
10217	11637.1	18	0.0369827
10219	11637.2	18	0.0371803
10221	11637.2	18	0.0371618
10223	11637.3	18	0.0370546
10225	11637.3	18	0.036884
10227	11637.4	18	0.0367202
10229	11637.4	18	0.0365186
10231	11637.5	18	0.0366749
10233	11637.5	18	0.0367172
10235	11637.6	18	0.036698
10237	11637.6	18	0.0366521
10239	11637.7	18	0.0366495
10241	11637.7	18	0.0366388
10243	11637.8	18	0.0366384
10245	11637.8	18	0.0366254
10247	11637.9	18	0.0366202
10249	11637.9	18	0.0365599
10251	11638	18	0.0365743
10253	11638	18	0.0365573
10255	11638.1	18	0.0366007
10257	11638.1	18	0.0366313
10259	11638.2	18	0.0366515
10261	11638.2	18	0.0366371
10263	11638.3	18	0.0367016
10265	11638.3	18	0.0366821
10267	11638.4	18	0.0366752
10269	11638.4	18	0.0367091
10271	11638.5	18	0.0366997
10273	11638.5	18	0.0367241
10275	11638.6	18	0.0367247
10277	11638.6	18	0.036842
10279	11638.7	18	0.0368381
10281	11638.7	18	0.0367651
10283	11638.8	18	0.036754
10285	11638.8	18	0.0367788
10287	11638.9	18	0.0367879
10289	11638.9	18	0.0368482
10291	11639	18	0.0366642
10293	11639	18	0.0365336
10295	11639.1	18	0.0365967
10297	11639.1	18	0.0366322
10299	11639.2	18	0.0366964
10301	11639.2	18	0.0366892
10303	11639.3	18	0.0366238
10305	11639.3	18	0.0367065
10307	11639.4	18	0.0366208
10309	11639.4	18	0.0367058
10311	11639.5	18	0.0367189
10313	11639.5	18	0.0367693
10315	11639.6	18	0.0367843
10317	11639.6	18	0.0367645
10319	11639.7	18	0.0367869
10321	11639.7	18	0.03677
10323	11639.8	18	0.0368074
10325	11639.8	18	0.0367902
10327	11639.9	18	0.0367583
10329	11639.9	18	0.0367889
10331	11640	18	0.0367925
10333	11640	18	0.0368315
10335	11640.1	18	0.0367892
10337	11640.1	18	0.036785
10339	11640.2	18	0.0367941
10341	11640.2	18	0.0367211
10343	11640.3	18	0.0367189
10345	11640.3	18	0.0367023
10347	11640.4	18	0.0366391
10349	11640.4	18	0.0366964
10351	11640.5	18	0.0367469
10353	11640.5	18	0.0367273
10355	11640.6	18	0.0367104
10357	11640.6	18	0.036673
10359	11640.7	18	0.0366697
10361	11640.7	18	0.0366857
10363	11640.8	18	0.0367016
10365	11640.8	18	0.0366756
10367	11640.9	18	0.0367573
10369	11640.9	18	0.0367615
10371	11641	18	0.0368257
10373	11641	18	0.0368267
10375	11641.1	18	0.0368377
10377	11641.1	18	0.0369149
10379	11641.2	18	0.0368543
10381	11641.2	18	0.0368205
10383	11641.3	18	0.0368628
10385	11641.3	18	0.0368377
10387	11641.4	18	0.0369068
10389	11641.4	18	0.0369325
10391	11641.5	18	0.0369107
10393	11641.5	18	0.0369003
10395	11641.6	18	0.0368999
10397	11641.6	18	0.0368898
10399	11641.7	18	0.0370012
10401	11641.7	18	0.0369491
10403	11641.8	18	0.0369403
10405	11641.8	18	0.0370494
10407	11641.9	18	0.0370393
10409	11641.9	18	0.0370325
10411	11642	18	0.037067
10413	11642	18	0.0370628
10415	11642.1	18	0.0371422
10417	11642.1	18	0.0371644
10419	11642.2	18	0.0372357
10421	11642.2	18	0.0372559
10423	11642.3	18	0.0372148
10425	11642.3	18	0.0372637
10427	11642.4	18	0.0373448
10429	11642.4	18	0.0372543
10431	11642.5	18	0.0372836
10433	11642.5	18	0.0372513
10435	11642.6	18	0.0371914
10437	11642.6	18	0.0373038
10439	11642.7	18	0.0373568
10441	11642.7	18	0.0372595
10443	11642.8	18	0.0373529
10445	11642.8	18	0.0373288
10447	11642.9	18	0.0373116
10449	11642.9	18	0.0373389
10451	11643	18	0.037291
10453	11643	18	0.0373226
10455	11643.1	18	0.0373783
10457	11643.1	18	0.0373158
10459	11643.2	18	0.0373402
10461	11643.2	18	0.0372917
10463	11643.3	18	0.0373386
10465	11643.3	18	0.0372748
10467	11643.4	18	0.0372057
10469	11643.4	18	0.0372145
10471	11643.5	18	0.0372207
10473	11643.5	18	0.0373151
10475	11643.6	18	0.0372953
10477	11643.6	18	0.0373116
10479	11643.7	18	0.0372976
10481	11643.7	18	0.0373119
10483	11643.8	18	0.0373314
10485	11643.8	18	0.0373008
10487	11643.9	18	0.03725
10489	11643.9	18	0.0372415
10491	11644	18	0.037252
10493	11644	18	0.0371969
10495	11644.1	18	0.0371666
10497	11644.1	18	0.0371575
10499	11644.2	18	0.0371419
10501	11644.2	18	0.0371321
10503	11644.3	18	0.0371647
10505	11644.3	18	0.0370699
10507	11644.4	18	0.0371481
10509	11644.4	18	0.0372008
10511	11644.5	18	0.0372331
10513	11644.5	18	0.0372132
10515	11644.6	18	0.0371999
10517	11644.6	18	0.0371927
10519	11644.7	18	0.0371312
10521	11644.7	18	0.0370983
10523	11644.8	18	0.0371145
10525	11644.8	18	0.0371328
10527	11644.9	18	0.0370833
10529	11644.9	18	0.0370341
10531	11645	18	0.0370289
10533	11645	18	0.0369348
10535	11645.1	18	0.0369901
10537	11645.1	18	0.0369211
10539	11645.2	18	0.0369579
10541	11645.2	18	0.0369602
10543	11645.3	18	0.0369967
10545	11645.3	18	0.0368706
10547	11645.4	18	0.0369439
10549	11645.4	18	0.0369234
10551	11645.5	18	0.0369752
10553	11645.5	18	0.0369104
10555	11645.6	18	0.0369169
10557	11645.6	18	0.0369328
10559	11645.7	18	0.0369302
10561	11645.7	18	0.0368866
10563	11645.8	18	0.0369439
10565	11645.8	18	0.0369605
10567	11645.9	18	0.0369872
10569	11645.9	18	0.0370462
10571	11646	18	0.0370683
10573	11646	18	0.0370295
10575	11646.1	18	0.0369888
10577	11646.1	18	0.0370015
10579	11646.2	18	0.0370256
10581	11646.2	18	0.0369862
10583	11646.3	18	0.0369371
10585	11646.3	18	0.0369462
10587	11646.4	18	0.0369605
10589	11646.4	18	0.0369035
10591	11646.5	18	0.036896
10593	11646.5	18	0.0368302
10595	11646.6	18	0.0368407
10597	11646.6	18	0.0368654
10599	11646.7	18	0.0368579
10601	11646.7	18	0.0368687
10603	11646.8	18	0.0367759
10605	11646.8	18	0.0367615
10607	11646.9	18	0.0367674
10609	11646.9	18	0.0367667
10611	11647	18	0.0367596
10613	11647	18	0.0367286
10615	11647.1	18	0.0367091
10617	11647.1	18	0.036771
10619	11647.2	18	0.0367837
10621	11647.2	18	0.0367254
10623	11647.3	18	0.0367238
10625	11647.3	18	0.0367215
10627	11647.4	18	0.0367404
10629	11647.4	18	0.0366013
10631	11647.5	18	0.0366655
10633	11647.5	18	0.0367358
10635	11647.6	18	0.0367101
10637	11647.6	18	0.0367697
10639	11647.7	18	0.0367706
10641	11647.7	18	0.0368472
10643	11647.8	18	0.036785
10645	11647.8	18	0.0368885
10647	11647.9	18	0.0369696
10649	11647.9	18	0.0370178
10651	11648	18	0.0370624
10653	11648	18	0.0370654
10655	11648.1	18	0.0370234
10657	11648.1	18	0.0369677
10659	11648.2	18	0.0370022
10661	11648.2	18	0.037039
10663	11648.3	18	0.0370159
10665	11648.3	18	0.037025
10667	11648.4	18	0.0370686
10669	11648.4	18	0.0371119
10671	11648.5	18	0.0371338
10673	11648.5	18	0.0371683
10675	11648.6	18	0.0370771
10677	11648.6	18	0.037137
10679	11648.7	18	0.0371292
10681	11648.7	18	0.0371113
10683	11648.8	18	0.0371279
10685	11648.8	18	0.037122
10687	11648.9	18	0.0371588
10689	11648.9	18	0.0371478
10691	11649	18	0.0370478
10693	11649	18	0.0370416
10695	11649.1	18	0.0370178
10697	11649.1	18	0.0369885
10699	11649.2	18	0.0370273
10701	11649.2	18	0.0370129
10703	11649.3	18	0.0369537
10705	11649.3	18	0.036955
10707	11649.4	18	0.0369205
10709	11649.4	18	0.0369185
10711	11649.5	18	0.0368094
10713	11649.5	18	0.0368065
10715	11649.6	18	0.0369397
10717	11649.6	18	0.0368625
10719	11649.7	18	0.0369406
10721	11649.7	18	0.0370032
10723	11649.8	18	0.0369895
10725	11649.8	18	0.0369941
10727	11649.9	18	0.0370286
10729	11649.9	18	0.0369742
10731	11650	18	0.0370507
10733	11650	18	0.0369973
10735	11650.1	18	0.0370367
10737	11650.1	18	0.0369941
10739	11650.2	18	0.0369315
10741	11650.2	18	0.0369019
10743	11650.3	18	0.0368654
10745	11650.3	18	0.036799
10747	11650.4	18	0.0368348
10749	11650.4	18	0.0368605
10751	11650.5	18	0.0368338
10753	11650.5	18	0.0367902
10755	11650.6	18	0.0367817
10757	11650.6	18	0.0367368
10759	11650.7	18	0.0367296
10761	11650.7	18	0.0366993
10763	11650.8	18	0.0367384
10765	11650.8	18	0.0367531
10767	11650.9	18	0.0366817
10769	11650.9	18	0.0367492
10771	11651	18	0.0367387
10773	11651	18	0.0367837
10775	11651.1	18	0.036812
10777	11651.1	18	0.0367742
10779	11651.2	18	0.0367579
10781	11651.2	18	0.0367749
10783	11651.3	18	0.0367583
10785	11651.3	18	0.0368257
10787	11651.4	18	0.0368065
10789	11651.4	18	0.0368153
10791	11651.5	18	0.0368426
10793	11651.5	18	0.0368117
10795	11651.6	18	0.0368342
10797	11651.6	18	0.0367918
10799	11651.7	18	0.0368221
10801	11651.7	18	0.0368188
10803	11651.8	18	0.036885
10805	11651.8	18	0.036826
10807	11651.9	18	0.0368941
10809	11651.9	18	0.0368726
10811	11652	18	0.0369048
10813	11652	18	0.0369631
10815	11652.1	18	0.0369621
10817	11652.1	18	0.0369182
10819	11652.2	18	0.0369328
10821	11652.2	18	0.0368
10823	11652.3	18	0.0369397
10825	11652.3	18	0.0369612
10827	11652.4	18	0.0369175
10829	11652.4	18	0.0369296
10831	11652.5	18	0.0369084
10833	11652.5	18	0.036924
10835	11652.6	18	0.036925
10837	11652.6	18	0.0368915
10839	11652.7	18	0.0369449
10841	11652.7	18	0.0369221
10843	11652.8	18	0.0368628
10845	11652.8	18	0.0369292
10847	11652.9	18	0.0368928
10849	11652.9	18	0.0368635
10851	11653	18	0.0368876
10853	11653	18	0.0368651
10855	11653.1	18	0.0367996
10857	11653.1	18	0.0368088
10859	11653.2	18	0.0367378
10861	11653.2	18	0.0367332
10863	11653.3	18	0.0368032
10865	11653.3	18	0.0367531
10867	11653.4	18	0.0368475
10869	11653.4	18	0.0368569
10871	11653.5	18	0.0368739
10873	11653.5	18	0.0368817
10875	11653.6	18	0.0369423
10877	11653.6	18	0.0370201
10879	11653.7	18	0.0370504
10881	11653.7	18	0.0369025
10883	11653.8	18	0.0369498
10885	11653.8	18	0.0368644
10887	11653.9	18	0.0367889
10889	11653.9	18	0.0368736
10891	11654	18	0.0368364
10893	11654	18	0.0368397
10895	11654.1	18	0.0369657
10897	11654.1	18	0.0369218
10899	11654.2	18	0.0369413
10901	11654.2	18	0.0369446
10903	11654.3	18	0.0369139
10905	11654.3	18	0.0370006
10907	11654.4	18	0.0370165
10909	11654.4	18	0.0370103
10911	11654.5	18	0.0370419
10913	11654.5	18	0.0369423
10915	11654.6	18	0.036954
10917	11654.6	18	0.0368889
10919	11654.7	18	0.0369384
10921	11654.7	18	0.0369449
10923	11654.8	18	0.0369794
10925	11654.8	18	0.0370471
10927	11654.9	18	0.0370133
10929	11654.9	18	0.0368866
10931	11655	18	0.0368892
10933	11655	18	0.0369716
10935	11655.1	18	0.0370602
10937	11655.1	18	0.0370979
10939	11655.2	18	0.0370403
10941	11655.2	18	0.0370725
10943	11655.3	18	0.0371764
10945	11655.3	18	0.0371354
10947	11655.4	18	0.0371478
10949	11655.4	18	0.0371693
10951	11655.5	18	0.0371142
10953	11655.5	18	0.0371598
10955	11655.6	18	0.0371657
10957	11655.6	18	0.0370015
10959	11655.7	18	0.0371025
10961	11655.7	18	0.037082
10963	11655.8	18	0.0370178
10965	11655.8	18	0.0370657
10967	11655.9	18	0.0369335
10969	11655.9	18	0.0368843
10971	11656	18	0.0368762
10973	11656	18	0.0368241
10975	11656.1	18	0.0368605
10977	11656.1	18	0.0368592
10979	11656.2	18	0.0368859
10981	11656.2	18	0.0368596
10983	11656.3	18	0.0368905
10985	11656.3	18	0.0369397
10987	11656.4	18	0.0369947
10989	11656.4	18	0.0368996
10991	11656.5	18	0.0369488
10993	11656.5	18	0.0370129
10995	11656.6	18	0.0369908
10997	11656.6	18	0.0369898
10999	11656.7	18	0.0369475
11001	11656.7	18	0.0369237
11003	11656.8	18	0.0369654
11005	11656.8	18	0.0368801
11007	11656.9	18	0.0369205
11009	11656.9	18	0.0369898
11011	11657	18	0.0370146
11013	11657	18	0.0369784
11015	11657.1	18	0.0369358
11017	11657.1	18	0.0368602
11019	11657.2	18	0.0368706
11021	11657.2	18	0.0368859
11023	11657.3	18	0.0368009
11025	11657.3	18	0.0368185
11027	11657.4	18	0.0368241
11029	11657.4	18	0.0368254
11031	11657.5	18	0.0367342
11033	11657.5	18	0.0368221
11035	11657.6	18	0.0369286
11037	11657.6	18	0.0369755
11039	11657.7	18	0.0369146
11041	11657.7	18	0.0368716
11043	11657.8	18	0.036896
11045	11657.8	18	0.0368055
11047	11657.9	18	0.0368016
11049	11657.9	18	0.0368117
11051	11658	18	0.0368048
11053	11658	18	0.0368397
11055	11658.1	18	0.0368638
11057	11658.1	18	0.0368286
11059	11658.2	18	0.0368696
11061	11658.2	18	0.0369084
11063	11658.3	18	0.0368462
11065	11658.3	18	0.0368267
11067	11658.4	18	0.0368433
11069	11658.4	18	0.0368696
11071	11658.5	18	0.0368583
11073	11658.5	18	0.0369537
11075	11658.6	18	0.0369748
11077	11658.6	18	0.0369742
11079	11658.7	18	0.0370452
11081	11658.7	18	0.0371452
11083	11658.8	18	0.0370957
11085	11658.8	18	0.0370576
11087	11658.9	18	0.0369846
11089	11658.9	18	0.0369644
11091	11659	18	0.0369765
11093	11659	18	0.0369843
11095	11659.1	18	0.0369859
11097	11659.1	18	0.0369439
11099	11659.2	18	0.0368957
11101	11659.2	18	0.0368644
11103	11659.3	18	0.0368723
11105	11659.3	18	0.0367755
11107	11659.4	18	0.0367198
11109	11659.4	18	0.0366866
11111	11659.5	18	0.0366124
11113	11659.5	18	0.0367026
11115	11659.6	18	0.0366984
11117	11659.6	18	0.0368078
11119	11659.7	18	0.0368797
11121	11659.7	18	0.0368657
11123	11659.8	18	0.0368983
11125	11659.8	18	0.0367619
11127	11659.9	18	0.0367436
11129	11659.9	18	0.0367658
11131	11660	18	0.0367925
11133	11660	18	0.0367573
11135	11660.1	18	0.0367814
11137	11660.1	18	0.0367319
11139	11660.2	18	0.0367283
11141	11660.2	18	0.0368055
11143	11660.3	18	0.0368068
11145	11660.3	18	0.0368384
11147	11660.4	18	0.0368749
11149	11660.4	18	0.0368674
11151	11660.5	18	0.0368625
11153	11660.5	18	0.0368117
11155	11660.6	18	0.036768
11157	11660.6	18	0.0367733
11159	11660.7	18	0.0367733
11161	11660.7	18	0.0367746
11163	11660.8	18	0.0367967
11165	11660.8	18	0.0367951
11167	11660.9	18	0.0368837
11169	11660.9	18	0.0368703
11171	11661	18	0.0369091
11173	11661	18	0.0370289
11175	11661.1	18	0.0369224
11177	11661.1	18	0.0368833
11179	11661.2	18	0.0369361
11181	11661.2	18	0.0369631
11183	11661.3	18	0.0370624
11185	11661.3	18	0.0370432
11187	11661.4	18	0.0370377
11189	11661.4	18	0.0370445
11191	11661.5	18	0.0370523
11193	11661.5	18	0.0369377
11195	11661.6	18	0.036967
11197	11661.6	18	0.0369537
11199	11661.7	18	0.0369042
11201	11661.7	18	0.0369374
11203	11661.8	18	0.0368905
11205	11661.8	18	0.0368573
11207	11661.9	18	0.0368423
11209	11661.9	18	0.0368442
11211	11662	18	0.0368407
11213	11662	18	0.0369273
11215	11662.1	18	0.0369094
11217	11662.1	18	0.0369136
11219	11662.2	18	0.0369302
11221	11662.2	18	0.0369348
11223	11662.3	18	0.0369234
11225	11662.3	18	0.0369367
11227	11662.4	18	0.0369615
11229	11662.4	18	0.0369266
11231	11662.5	18	0.036939
11233	11662.5	18	0.0369719
11235	11662.6	18	0.0370113
11237	11662.6	18	0.0370354
11239	11662.7	18	0.0370878
11241	11662.7	18	0.0370188
11243	11662.8	18	0.0371054
11245	11662.8	18	0.0370738
11247	11662.9	18	0.0370475
11249	11662.9	18	0.0370403
11251	11663	18	0.0370582
11253	11663	18	0.0370729
11255	11663.1	18	0.0371175
11257	11663.1	18	0.0371865
11259	11663.2	18	0.0372324
11261	11663.2	18	0.0372028
11263	11663.3	18	0.0372471
11265	11663.3	18	0.0372158
11267	11663.4	18	0.0372279
11269	11663.4	18	0.0372982
11271	11663.5	18	0.0373034
11273	11663.5	18	0.0372904
11275	11663.6	18	0.0372373
11277	11663.6	18	0.0372282
11279	11663.7	18	0.0372093
11281	11663.7	18	0.0371904
11283	11663.8	18	0.0372285
11285	11663.8	18	0.037281
11287	11663.9	18	0.03721
11289	11663.9	18	0.0373015
11291	11664	18	0.0373132
11293	11664	18	0.0373314
11295	11664.1	18	0.0373464
11297	11664.1	18	0.0372774
11299	11664.2	18	0.037277
11301	11664.2	18	0.0372686
11303	11664.3	18	0.0372891
11305	11664.3	18	0.0373578
11307	11664.4	18	0.0372865
11309	11664.4	18	0.0372197
11311	11664.5	18	0.0371839
11313	11664.5	18	0.037222
11315	11664.6	18	0.0371758
11317	11664.6	18	0.037166
11319	11664.7	18	0.0371904
11321	11664.7	18	0.0371934
11323	11664.8	18	0.0371878
11325	11664.8	18	0.0371885
11327	11664.9	18	0.0371149
11329	11664.9	18	0.0372158
11331	11665	18	0.0371201
11333	11665	18	0.0371354
11335	11665.1	18	0.0371224
11337	11665.1	18	0.0370865
11339	11665.2	18	0.0371188
11341	11665.2	18	0.0370927
11343	11665.3	18	0.0370357
11345	11665.3	18	0.037038
11347	11665.4	18	0.0369957
11349	11665.4	18	0.0370286
11351	11665.5	18	0.0370445
11353	11665.5	18	0.0369973
11355	11665.6	18	0.0370465
11357	11665.6	18	0.0370465
11359	11665.7	18	0.0370377
11361	11665.7	18	0.0370546
11363	11665.8	18	0.0370852
11365	11665.8	18	0.0370302
11367	11665.9	18	0.0370732
11369	11665.9	18	0.0371201
11371	11666	18	0.0370953
11373	11666	18	0.0371386
11375	11666.1	18	0.0370989
11377	11666.1	18	0.0371461
11379	11666.2	18	0.0371061
11381	11666.2	18	0.0370523
11383	11666.3	18	0.0370862
11385	11666.3	18	0.0371533
11387	11666.4	18	0.037167
11389	11666.4	18	0.0372575
11391	11666.5	18	0.0371976
11393	11666.5	18	0.037237
11395	11666.6	18	0.0371852
11397	11666.6	18	0.0371207
11399	11666.7	18	0.0371507
11401	11666.7	18	0.0371305
11403	11666.8	18	0.0370944
11405	11666.8	18	0.0371113
11407	11666.9	18	0.03715
11409	11666.9	18	0.0371471
11411	11667	18	0.0371559
11413	11667	18	0.0371924
11415	11667.1	18	0.0371907
11417	11667.1	18	0.0372129
11419	11667.2	18	0.0371624
11421	11667.2	18	0.0371631
11423	11667.3	18	0.0371943
11425	11667.3	18	0.0371386
11427	11667.4	18	0.0371862
11429	11667.4	18	0.037193
11431	11667.5	18	0.037138
11433	11667.5	18	0.0371582
11435	11667.6	18	0.037136
11437	11667.6	18	0.0370908
11439	11667.7	18	0.0371621
11441	11667.7	18	0.0372175
11443	11667.8	18	0.0371504
11445	11667.8	18	0.0371328
11447	11667.9	18	0.0371272
11449	11667.9	18	0.0371084
11451	11668	18	0.0371715
11453	11668	18	0.0372269
11455	11668.1	18	0.0372302
11457	11668.1	18	0.0372507
11459	11668.2	18	0.0371907
11461	11668.2	18	0.0371875
11463	11668.3	18	0.0371816
11465	11668.3	18	0.0371412
11467	11668.4	18	0.0370953
11469	11668.4	18	0.0370823
11471	11668.5	18	0.0370794
11473	11668.5	18	0.0370458
11475	11668.6	18	0.0370556
11477	11668.6	18	0.0370709
11479	11668.7	18	0.0369941
11481	11668.7	18	0.0370563
11483	11668.8	18	0.0370888
11485	11668.8	18	0.0370663
11487	11668.9	18	0.0369976
11489	11668.9	18	0.0369875
11491	11669	18	0.0370012
11493	11669	18	0.0369875
11495	11669.1	18	0.0369485
11497	11669.1	18	0.0370351
11499	11669.2	18	0.036995
11501	11669.2	18	0.0370517
11503	11669.3	18	0.0370999
11505	11669.3	18	0.0370419
11507	11669.4	18	0.0370361
11509	11669.4	18	0.0370957
11511	11669.5	18	0.0370797
11513	11669.5	18	0.0369892
11515	11669.6	18	0.0370514
11517	11669.6	18	0.0370155
11519	11669.7	18	0.0369957
11521	11669.7	18	0.0370045
11523	11669.8	18	0.0368876
11525	11669.8	18	0.0368876
11527	11669.9	18	0.0368599
11529	11669.9	18	0.0367612
11531	11670	18	0.0368042
11533	11670	18	0.0368061
11535	11670.1	18	0.0367599
11537	11670.1	18	0.0367433
11539	11670.2	18	0.0367518
11541	11670.2	18	0.0367325
11543	11670.3	18	0.0366791
11545	11670.3	18	0.0366814
11547	11670.4	18	0.0366365
11549	11670.4	18	0.0366479
11551	11670.5	18	0.0365687
11553	11670.5	18	0.0366052
11555	11670.6	18	0.0365658
11557	11670.6	18	0.0365593
11559	11670.7	18	0.0365938
11561	11670.7	18	0.0365225
11563	11670.8	18	0.0364313
11565	11670.8	18	0.0365323
11567	11670.9	18	0.0366655
11569	11670.9	18	0.0366189
11571	11671	18	0.0365004
11573	11671	18	0.0365945
11575	11671.1	18	0.0365495
11577	11671.1	18	0.0365271
11579	11671.2	18	0.0364864
11581	11671.2	18	0.0365495
11583	11671.3	18	0.0365697
11585	11671.3	18	0.0366309
11587	11671.4	18	0.0366072
11589	11671.4	18	0.036657
11591	11671.5	18	0.036726
11593	11671.5	18	0.0367293
11595	11671.6	18	0.0365593
11597	11671.6	18	0.0367195
11599	11671.7	18	0.0367599
11601	11671.7	18	0.036502
11603	11671.8	18	0.0366928
11605	11671.8	18	0.0365401
11607	11671.9	18	0.0363365
11609	11671.9	18	0.0364847
11611	11672	18	0.0363167
11613	11672	18	0.0361972
11615	11672.1	18	0.0363313
11617	11672.1	18	0.0362548
11619	11672.2	18	0.0362069
11621	11672.2	18	0.0362799
11623	11672.3	18	0.0363545
11625	11672.3	18	0.036231
11627	11672.4	18	0.03626
11629	11672.4	18	0.0363408
11631	11672.5	18	0.0361591
11633	11672.5	18	0.0362577
11635	11672.6	18	0.0363619
11637	11672.6	18	0.0362506
11639	11672.7	18	0.0362327
11641	11672.7	18	0.0362975
11643	11672.8	18	0.036134
11645	11672.8	18	0.0364564
11647	11672.9	18	0.0363874
11649	11672.9	18	0.0364261
11651	11673	18	0.0364212
11653	11673	18	0.0363909
11655	11673.1	18	0.0363786
11657	11673.1	18	0.0362675
11659	11673.2	18	0.0362375
11661	11673.2	18	0.036277
11663	11673.3	18	0.0360441
11665	11673.3	18	0.0360125
11667	11673.4	18	0.0365313
11669	11673.4	18	0.0368413
11671	11673.5	18	0.0371285
11673	11673.5	18	0.037421
11675	11673.6	18	0.0376258
11677	11673.6	18	0.037631
11679	11673.7	18	0.037956
11681	11673.7	18	0.037889
11683	11673.8	18	0.0379453
11685	11673.8	18	0.0379655
11687	11673.9	18	0.0380765
11689	11673.9	18	0.0380863
11691	11674	18	0.0380619
11693	11674	18	0.0381322
11695	11674.1	18	0.0383227
11697	11674.1	18	0.038313
11699	11674.2	18	0.038112
11701	11674.2	18	0.0381365
11703	11674.3	18	0.0382394
11705	11674.3	18	0.0382817
11707	11674.4	18	0.0384598
11709	11674.4	18	0.0385676
11711	11674.5	18	0.0387269
11713	11674.5	18	0.038594
11715	11674.6	18	0.0384917
11717	11674.6	18	0.0383973
11719	11674.7	18	0.0386015
11721	11674.7	18	0.0386543
11723	11674.8	18	0.0389636
11725	11674.8	18	0.0385947
11727	11674.9	18	0.0387432
11729	11674.9	18	0.0386836
11731	11675	18	0.0387125
11733	11675	18	0.0387047
11735	11675.1	18	0.0387011
11737	11675.1	18	0.0387034
11739	11675.2	18	0.0388282
11741	11675.2	18	0.0386998
11743	11675.3	18	0.0387392
11745	11675.3	18	0.0386969
11747	11675.4	18	0.0387171
11749	11675.4	18	0.0388881
11751	11675.5	18	0.0388884
11753	11675.5	18	0.0390568
11755	11675.6	18	0.0390219
11757	11675.6	18	0.0388702
11759	11675.7	18	0.0388568
11761	11675.7	18	0.0388581
11763	11675.8	18	0.0386718
11765	11675.8	18	0.0387178
11767	11675.9	18	0.0387103
11769	11675.9	18	0.0387441
11771	11676	18	0.0386569
11773	11676	18	0.0386728
11775	11676.1	18	0.038694
11777	11676.1	18	0.0386803
11779	11676.2	18	0.0386487
11781	11676.2	18	0.0386373
11783	11676.3	18	0.0387275
11785	11676.3	18	0.0386741
11787	11676.4	18	0.0386448
11789	11676.4	18	0.0386826
11791	11676.5	18	0.0386109
11793	11676.5	18	0.0384055
11795	11676.6	18	0.0384804
11797	11676.6	18	0.0384693
11799	11676.7	18	0.038423
11801	11676.7	18	0.0383006
11803	11676.8	18	0.0383651
11805	11676.8	18	0.0383263
11807	11676.9	18	0.0382882
11809	11676.9	18	0.0382739
11811	11677	18	0.0382172
11813	11677	18	0.0382091
11815	11677.1	18	0.0381736
11817	11677.1	18	0.0381052
11819	11677.2	18	0.0381019
11821	11677.2	18	0.0381303
11823	11677.3	18	0.0380466
11825	11677.3	18	0.0380482
11827	11677.4	18	0.0380095
11829	11677.4	18	0.037942
11831	11677.5	18	0.0380362
11833	11677.5	18	0.0379459
11835	11677.6	18	0.0379974
11837	11677.6	18	0.037957
11839	11677.7	18	0.0378958
11841	11677.7	18	0.0379287
11843	11677.8	18	0.0379277
11845	11677.8	18	0.0379521
11847	11677.9	18	0.0379889
11849	11677.9	18	0.037929
11851	11678	18	0.0378626
11853	11678	18	0.0378964
11855	11678.1	18	0.0378665
11857	11678.1	18	0.0379238
11859	11678.2	18	0.0379013
11861	11678.2	18	0.037903
11863	11678.3	18	0.0379235
11865	11678.3	18	0.0378496
11867	11678.4	18	0.0378395
11869	11678.4	18	0.0378443
11871	11678.5	18	0.0378209
11873	11678.5	18	0.0378978
11875	11678.6	18	0.0378854
11877	11678.6	18	0.0378346
11879	11678.7	18	0.0378163
11881	11678.7	18	0.0378222
11883	11678.8	18	0.037718
11885	11678.8	18	0.0377437
11887	11678.9	18	0.0377326
11889	11678.9	18	0.0377499
11891	11679	18	0.0377633
11893	11679	18	0.0376926
11895	11679.1	18	0.0376457
11897	11679.1	18	0.037703
11899	11679.2	18	0.0375858
11901	11679.2	18	0.0375877
11903	11679.3	18	0.0375656
11905	11679.3	18	0.0375343
11907	11679.4	18	0.037547
11909	11679.4	18	0.0375236
11911	11679.5	18	0.0374633
11913	11679.5	18	0.0375239
11915	11679.6	18	0.0374477
11917	11679.6	18	0.0374301
11919	11679.7	18	0.0375115
11921	11679.7	18	0.0375385
11923	11679.8	18	0.0375773
11925	11679.8	18	0.037422
11927	11679.9	18	0.0375392
11929	11679.9	18	0.0376017
11931	11680	18	0.0375366
11933	11680	18	0.0375555
11935	11680.1	18	0.0375522
11937	11680.1	18	0.037578
11939	11680.2	18	0.0375822
11941	11680.2	18	0.0375584
11943	11680.3	18	0.0375262
11945	11680.3	18	0.0375301
11947	11680.4	18	0.0375535
11949	11680.4	18	0.0374597
11951	11680.5	18	0.0375177
11953	11680.5	18	0.0374128
11955	11680.6	18	0.0373848
11957	11680.6	18	0.0373601
11959	11680.7	18	0.0373533
11961	11680.7	18	0.0373363
11963	11680.8	18	0.0373764
11965	11680.8	18	0.0373744
11967	11680.9	18	0.037293
11969	11680.9	18	0.0373178
11971	11681	18	0.0372569
11973	11681	18	0.0373106
11975	11681.1	18	0.0372972
11977	11681.1	18	0.0374389
11979	11681.2	18	0.0373933
11981	11681.2	18	0.0374226
11983	11681.3	18	0.0374373
11985	11681.3	18	0.0373197
11987	11681.4	18	0.0373184
11989	11681.4	18	0.0373458
11991	11681.5	18	0.0372471
11993	11681.5	18	0.0372354
11995	11681.6	18	0.0372751
11997	11681.6	18	0.0371966
11999	11681.7	18	0.0371953
12001	11681.7	18	0.037165
12003	11681.8	18	0.0371224
12005	11681.8	18	0.0371191
12007	11681.9	18	0.0371214
12009	11681.9	18	0.0370136
12011	11682	18	0.036996
12013	11682	18	0.037051
12015	11682.1	18	0.0371347
12017	11682.1	18	0.0370934
12019	11682.2	18	0.037066
12021	11682.2	18	0.037039
12023	11682.3	18	0.0370787
12025	11682.3	18	0.0370895
12027	11682.4	18	0.037152
12029	11682.4	18	0.037097
12031	11682.5	18	0.037136
12033	11682.5	18	0.0370683
12035	11682.6	18	0.0370038
12037	11682.6	18	0.0370722
12039	11682.7	18	0.036997
12041	11682.7	18	0.0370354
12043	11682.8	18	0.0371178
12045	11682.8	18	0.0369957
12047	11682.9	18	0.0370742
12049	11682.9	18	0.0370266
12051	11683	18	0.0370615
12053	11683	18	0.0371566
12055	11683.1	18	0.0371272
12057	11683.1	18	0.0371585
12059	11683.2	18	0.0371497
12061	11683.2	18	0.0371253
12063	11683.3	18	0.0371458
12065	11683.3	18	0.0371764
12067	11683.4	18	0.0371539
12069	11683.4	18	0.0371556
12071	11683.5	18	0.0372132
12073	11683.5	18	0.037193
12075	11683.6	18	0.0372829
12077	11683.6	18	0.0373194
12079	11683.7	18	0.0372666
12081	11683.7	18	0.0373086
12083	11683.8	18	0.0373725
12085	11683.8	18	0.0373454
12087	11683.9	18	0.0372956
12089	11683.9	18	0.037294
12091	11684	18	0.0372761
12093	11684	18	0.037264
12095	11684.1	18	0.0372458
12097	11684.1	18	0.0372647
12099	11684.2	18	0.0372683
12101	11684.2	18	0.0371839
12103	11684.3	18	0.0371904
12105	11684.3	18	0.0371562
12107	11684.4	18	0.0371745
12109	11684.4	18	0.0371546
12111	11684.5	18	0.0371422
12113	11684.5	18	0.037125
12115	11684.6	18	0.0371341
12117	11684.6	18	0.0370572
12119	11684.7	18	0.0370794
12121	11684.7	18	0.0371715
12123	11684.8	18	0.0370725
12125	11684.8	18	0.0371585
12127	11684.9	18	0.0371106
12129	11684.9	18	0.0371373
12131	11685	18	0.0371484
12133	11685	18	0.0370989
12135	11685.1	18	0.0371341
12137	11685.1	18	0.0370797
12139	11685.2	18	0.0370885
12141	11685.2	18	0.0370523
12143	11685.3	18	0.0370608
12145	11685.3	18	0.0370676
12147	11685.4	18	0.0370299
12149	11685.4	18	0.0370869
12151	11685.5	18	0.0370237
12153	11685.5	18	0.0370644
12155	11685.6	18	0.0370308
12157	11685.6	18	0.037137
12159	11685.7	18	0.0371738
12161	11685.7	18	0.0372272
12163	11685.8	18	0.0371852
12165	11685.8	18	0.0371797
12167	11685.9	18	0.0371533
12169	11685.9	18	0.0371504
12171	11686	18	0.0370084
12173	11686	18	0.0371315
12175	11686.1	18	0.037136
12177	11686.1	18	0.0371344
12179	11686.2	18	0.0370901
12181	11686.2	18	0.0369573
12183	11686.3	18	0.0369341
12185	11686.3	18	0.0368638
12187	11686.4	18	0.0367892
12189	11686.4	18	0.0367303
12191	11686.5	18	0.036783
12193	11686.5	18	0.0367762
12195	11686.6	18	0.0368784
12197	11686.6	18	0.0368788
12199	11686.7	18	0.0367876
12201	11686.7	18	0.0367781
12203	11686.8	18	0.0367974
12205	11686.8	18	0.0367482
12207	11686.9	18	0.0368749
12209	11686.9	18	0.0368446
12211	11687	18	0.036881
12213	11687	18	0.0368931
12215	11687.1	18	0.0369107
12217	11687.1	18	0.0369758
12219	11687.2	18	0.0369494
12221	11687.2	18	0.0369898
12223	11687.3	18	0.0370484
12225	11687.3	18	0.0370168
12227	11687.4	18	0.036969
12229	11687.4	18	0.0369032
12231	11687.5	18	0.0369136
12233	11687.5	18	0.0369328
12235	11687.6	18	0.036927
12237	11687.6	18	0.0369397
12239	11687.7	18	0.0369491
12241	11687.7	18	0.0369263
12243	11687.8	18	0.0369686
12245	11687.8	18	0.036983
12247	11687.9	18	0.0368918
12249	11687.9	18	0.036968
12251	11688	18	0.0369996
12253	11688	18	0.0369641
12255	11688.1	18	0.036966
12257	11688.1	18	0.0369247
12259	11688.2	18	0.036896
12261	11688.2	18	0.0369507
12263	11688.3	18	0.0370273
12265	11688.3	18	0.0369986
12267	11688.4	18	0.0369201
12269	11688.4	18	0.0369898
12271	11688.5	18	0.0369677
12273	11688.5	18	0.0369387
12275	11688.6	18	0.0369403
12277	11688.6	18	0.0369716
12279	11688.7	18	0.0369208
12281	11688.7	18	0.0369221
12283	11688.8	18	0.0369064
12285	11688.8	18	0.0368804
12287	11688.9	18	0.0368169
12289	11688.9	18	0.0368182
12291	11689	18	0.0367534
12293	11689	18	0.0367498
12295	11689.1	18	0.036726
12297	11689.1	18	0.0367576
12299	11689.2	18	0.0367391
12301	11689.2	18	0.0367231
12303	11689.3	18	0.036729
12305	11689.3	18	0.0366749
12307	11689.4	18	0.0366857
12309	11689.4	18	0.0366596
12311	11689.5	18	0.0366961
12313	11689.5	18	0.0367641
12315	11689.6	18	0.036729
12317	11689.6	18	0.0367811
12319	11689.7	18	0.0367185
12321	11689.7	18	0.0367762
12323	11689.8	18	0.0367899
12325	11689.8	18	0.0367961
12327	11689.9	18	0.0367492
12329	11689.9	18	0.0367729
12331	11690	18	0.0367586
12333	11690	18	0.0367254
12335	11690.1	18	0.0367697
12337	11690.1	18	0.0367198
12339	11690.2	18	0.0366674
12341	11690.2	18	0.0366879
12343	11690.3	18	0.0366651
12345	11690.3	18	0.0366182
12347	11690.4	18	0.0365554
12349	11690.4	18	0.0365401
12351	11690.5	18	0.0365616
12353	11690.5	18	0.0365391
12355	11690.6	18	0.0365017
12357	11690.6	18	0.0365137
12359	11690.7	18	0.0364776
12361	11690.7	18	0.0364658
12363	11690.8	18	0.0364919
12365	11690.8	18	0.0364629
12367	11690.9	18	0.036487
12369	11690.9	18	0.0365127
12371	11691	18	0.036556
12373	11691	18	0.0365313
12375	11691.1	18	0.0365775
12377	11691.1	18	0.0365218
12379	11691.2	18	0.0364903
12381	11691.2	18	0.0364359
12383	11691.3	18	0.0364538
12385	11691.3	18	0.0365274
12387	11691.4	18	0.036487
12389	11691.4	18	0.0365075
12391	11691.5	18	0.0364955
12393	11691.5	18	0.0364675
12395	11691.6	18	0.0364958
12397	11691.6	18	0.0364785
12399	11691.7	18	0.0365254
12401	11691.7	18	0.0365118
12403	11691.8	18	0.0365359
12405	11691.8	18	0.0365619
12407	11691.9	18	0.0365534
12409	11691.9	18	0.0365997
12411	11692	18	0.0366078
12413	11692	18	0.0365792
12415	11692.1	18	0.0365642
12417	11692.1	18	0.0365137
12419	11692.2	18	0.0363535
12421	11692.2	18	0.0363672
12423	11692.3	18	0.0365316
12425	11692.3	18	0.0365427
12427	11692.4	18	0.0365492
12429	11692.4	18	0.0365235
12431	11692.5	18	0.0364961
12433	11692.5	18	0.0364955
12435	11692.6	18	0.0365378
12437	11692.6	18	0.0365114
12439	11692.7	18	0.0365769
12441	11692.7	18	0.0366156
12443	11692.8	18	0.0366036
12445	11692.8	18	0.0365808
12447	11692.9	18	0.0365378
12449	11692.9	18	0.0365215
12451	11693	18	0.0365091
12453	11693	18	0.0364932
12455	11693.1	18	0.0365831
12457	11693.1	18	0.0365456
12459	11693.2	18	0.0365593
12461	11693.2	18	0.0365704
12463	11693.3	18	0.0365271
12465	11693.3	18	0.0364955
12467	11693.4	18	0.0365381
12469	11693.4	18	0.0364779
12471	11693.5	18	0.036517
12473	11693.5	18	0.0365043
12475	11693.6	18	0.036415
12477	11693.6	18	0.0364772
12479	11693.7	18	0.0364209
12481	11693.7	18	0.0363955
12483	11693.8	18	0.0364323
12485	11693.8	18	0.0364554
12487	11693.9	18	0.0363828
12489	11693.9	18	0.0363535
12491	11694	18	0.0363219
12493	11694	18	0.0363199
12495	11694.1	18	0.0363115
12497	11694.1	18	0.0363004
12499	11694.2	18	0.0362916
12501	11694.2	18	0.0362261
12503	11694.3	18	0.0362004
12505	11694.3	18	0.036259
12507	11694.4	18	0.0362493
12509	11694.4	18	0.0362235
12511	11694.5	18	0.0362327
12513	11694.5	18	0.036177
12515	11694.6	18	0.0362447
12517	11694.6	18	0.0362134
12519	11694.7	18	0.0362258
12521	11694.7	18	0.0361952
12523	11694.8	18	0.0362053
12525	11694.8	18	0.0361861
12527	11694.9	18	0.0362489
12529	11694.9	18	0.0362708
12531	11695	18	0.0363554
12533	11695	18	0.0363414
12535	11695.1	18	0.036403
12537	11695.1	18	0.0363606
12539	11695.2	18	0.0363903
12541	11695.2	18	0.0363717
12543	11695.3	18	0.0364509
12545	11695.3	18	0.036458
12547	11695.4	18	0.0363952
12549	11695.4	18	0.0364209
12551	11695.5	18	0.0363685
12553	11695.5	18	0.0364222
12555	11695.6	18	0.0364108
12557	11695.6	18	0.0363339
12559	11695.7	18	0.0363812
12561	11695.7	18	0.0363935
12563	11695.8	18	0.0363659
12565	11695.8	18	0.0363577
12567	11695.9	18	0.036331
12569	11695.9	18	0.0363538
12571	11696	18	0.0363118
12573	11696	18	0.0362675
12575	11696.1	18	0.0362366
12577	11696.1	18	0.036259
12579	11696.2	18	0.0362226
12581	11696.2	18	0.0362809
12583	11696.3	18	0.0362268
12585	11696.3	18	0.0362529
12587	11696.4	18	0.0362284
12589	11696.4	18	0.0362763
12591	11696.5	18	0.0361858
12593	11696.5	18	0.0362327
12595	11696.6	18	0.03629
12597	11696.6	18	0.0363929
12599	11696.7	18	0.0363981
12601	11696.7	18	0.0363994
12603	11696.8	18	0.0364118
12605	11696.8	18	0.0364186
12607	11696.9	18	0.036471
12609	11696.9	18	0.0364482
12611	11697	18	0.036517
12613	11697	18	0.0365909
12615	11697.1	18	0.036614
12617	11697.1	18	0.0366772
12619	11697.2	18	0.0366658
12621	11697.2	18	0.0366589
12623	11697.3	18	0.0368814
12625	11697.3	18	0.0367443
12627	11697.4	18	0.0367078
12629	11697.4	18	0.0366345
12631	11697.5	18	0.0367208
12633	11697.5	18	0.0367
12635	11697.6	18	0.0366296
12637	11697.6	18	0.0366127
12639	11697.7	18	0.0365192
12641	11697.7	18	0.0365176
12643	11697.8	18	0.036432
12645	11697.8	18	0.0364691
12647	11697.9	18	0.0364616
12649	11697.9	18	0.036486
12651	11698	18	0.0365479
12653	11698	18	0.036502
12655	11698.1	18	0.0365043
12657	11698.1	18	0.0365326
12659	11698.2	18	0.0364844
12661	11698.2	18	0.0365026
12663	11698.3	18	0.0364955
12665	11698.3	18	0.0363906
12667	11698.4	18	0.036386
12669	11698.4	18	0.036316
12671	11698.5	18	0.0363499
12673	11698.5	18	0.036361
12675	11698.6	18	0.0363411
12677	11698.6	18	0.0363147
12679	11698.7	18	0.0362662
12681	11698.7	18	0.0362496
12683	11698.8	18	0.0363649
12685	11698.8	18	0.0363805
12687	11698.9	18	0.0363958
12689	11698.9	18	0.0363867
12691	11699	18	0.0362675
12693	11699	18	0.0362108
12695	11699.1	18	0.0362252
12697	11699.1	18	0.0362275
12699	11699.2	18	0.036232
12701	11699.2	18	0.0362535
12703	11699.3	18	0.0362369
12705	11699.3	18	0.0362542
12707	11699.4	18	0.0361933
12709	11699.4	18	0.0361532
12711	11699.5	18	0.036178
12713	11699.5	18	0.0361643
12715	11699.6	18	0.0361861
12717	11699.6	18	0.0361802
12719	11699.7	18	0.0360904
12721	11699.7	18	0.0361535
12723	11699.8	18	0.0361268
12725	11699.8	18	0.0361206
12727	11699.9	18	0.0360656
12729	11699.9	18	0.0360786
12731	11700	18	0.0360415
[truncated: 15,603 more rows]

## Sheet: Mouse 3_Event Trials
4.56673e+07	12:41:07.3342080	11643.3	1	2021-12-22T12:41:07.3342080-06:00
4.5841e+07	12:44:00.9990784	11816.9	2	2021-12-22T12:44:00.9990784-06:00
4.60387e+07	12:47:18.7116672	12014.6	3	2021-12-22T12:47:18.7116672-06:00
4.61772e+07	12:49:37.2295168	12153.1	4	2021-12-22T12:49:37.2295168-06:00
4.63707e+07	12:52:50.6880640	12346.5	5	2021-12-22T12:52:50.6880640-06:00

[truncated: 9 more sheets: Mouse 4_415, Mouse 4_470, Mouse 4_Event Trials, Mouse 5_415, Mouse 5_470, Mouse 5_Event Trials, Mouse 6_415, Mouse 6_470, Mouse 6_Event Trials]
