# Supplementary material for: Glutamatergic supramammillary nucleus neurons respond to threatening stressors and promote active coping
Source: eLife. 2024 Jun 3;12:RP90972. doi: 10.7554/eLife.90972 (PMC11147510; doi:10.7554/eLife.90972)
Supplement: Figure 3—source data 3. [file elife-90972-fig3-data3.xlsx]

## Sheet: Figure 3 J and K
	Figure 3 J and K. For each mouse, there are four worksheets (GCaMPs 470, Isosbestic 415, timestamp for ambush, and velocity values)

## Sheet: Mouse 1_415 Signal
FrameCounter	Timestamp	LedState	Stimulation	Output0	Output1	Input0	Input1	Region0G
7426	193.11	1	0	1	0	0	0	0.0171937
7428	193.144	1	0	1	0	0	0	0.0173193
7430	193.177	1	0	1	0	0	0	0.0173057
7432	193.21	1	0	1	0	0	0	0.0173423
7434	193.244	1	0	1	0	0	0	0.0173705
7436	193.277	1	0	1	0	0	0	0.0173646
7438	193.31	1	0	1	0	0	0	0.0173193
7440	193.344	1	0	1	0	0	0	0.0173548
7442	193.377	1	0	1	0	0	0	0.0173493
7444	193.41	1	0	1	0	0	0	0.0173221
7446	193.444	1	0	1	0	0	0	0.0172705
7448	193.477	1	0	1	0	0	0	0.0172645
7450	193.51	1	0	1	0	0	0	0.0172987
7452	193.544	1	0	1	0	0	0	0.0173193
7454	193.577	1	0	1	0	0	0	0.0173904
7456	193.61	1	0	1	0	0	0	0.017351
7458	193.644	1	0	1	0	0	0	0.0173357
7460	193.677	1	0	1	0	0	0	0.017297
7462	193.71	1	0	1	0	0	0	0.0173531
7464	193.744	1	0	1	0	0	0	0.0173866
7466	193.777	1	0	1	0	0	0	0.0173514
7468	193.81	1	0	1	0	0	0	0.017344
7470	193.844	1	0	1	0	0	0	0.0173154
7472	193.877	1	0	1	0	0	0	0.0173165
7474	193.91	1	0	1	0	0	0	0.0172921
7476	193.944	1	0	1	0	0	0	0.0173032
7478	193.977	1	0	1	0	0	0	0.0173587
7480	194.01	1	0	1	0	0	0	0.0173217
7482	194.044	1	0	1	0	0	0	0.0173175
7484	194.077	1	0	1	0	0	0	0.0172649
7486	194.11	1	0	1	0	0	0	0.0173332
7488	194.144	1	0	1	0	0	0	0.0173681
7490	194.177	1	0	1	0	0	0	0.0173527
7492	194.21	1	0	1	0	0	0	0.0173032
7494	194.244	1	0	1	0	0	0	0.0173147
7496	194.277	1	0	1	0	0	0	0.0172642
7498	194.31	1	0	1	0	0	0	0.0172921
7500	194.344	1	0	1	0	0	0	0.0174996
7502	194.377	1	0	1	0	0	0	0.0177015
7504	194.41	1	0	1	0	0	0	0.0174877
7506	194.444	1	0	1	0	0	0	0.017533
7508	194.477	1	0	1	0	0	0	0.0175993
7510	194.51	1	0	1	0	0	0	0.0175909
7512	194.544	1	0	1	0	0	0	0.0174727
7514	194.577	1	0	1	0	0	0	0.0174005
7516	194.61	1	0	1	0	0	0	0.0174797
7518	194.644	1	0	1	0	0	0	0.0174277
7520	194.677	1	0	1	0	0	0	0.0174239
7522	194.71	1	0	1	0	0	0	0.0173336
7524	194.744	1	0	1	0	0	0	0.0175948
7526	194.777	1	0	1	0	0	0	0.0175445
7528	194.81	1	0	1	0	0	0	0.0175306
7530	194.844	1	0	1	0	0	0	0.0175257
7532	194.877	1	0	1	0	0	0	0.0175069
7534	194.91	1	0	1	0	0	0	0.0176226
7536	194.944	1	0	1	0	0	0	0.0176429
7538	194.977	1	0	1	0	0	0	0.0175125
7540	195.01	1	0	1	0	0	0	0.0174389
7542	195.044	1	0	1	0	0	0	0.0174563
7544	195.077	1	0	1	0	0	0	0.0175791
7546	195.11	1	0	1	0	0	0	0.0175975
7548	195.144	1	0	1	0	0	0	0.0174996
7550	195.177	1	0	1	0	0	0	0.0174567
7552	195.21	1	0	1	0	0	0	0.0174602
7554	195.244	1	0	1	0	0	0	0.0175975
7556	195.277	1	0	1	0	0	0	0.0175097
7558	195.31	1	0	1	0	0	0	0.0173632
7560	195.344	1	0	1	0	0	0	0.0173887
7562	195.377	1	0	1	0	0	0	0.0173357
7564	195.41	1	0	1	0	0	0	0.0172534
7566	195.443	1	0	1	0	0	0	0.0172098
7568	195.477	1	0	1	0	0	0	0.0172823
7570	195.51	1	0	1	0	0	0	0.0172596
7572	195.543	1	0	1	0	0	0	0.0172621
7574	195.577	1	0	1	0	0	0	0.0172161
7576	195.61	1	0	1	0	0	0	0.0173078
7578	195.643	1	0	1	0	0	0	0.0173332
7580	195.677	1	0	1	0	0	0	0.0173151
7582	195.71	1	0	1	0	0	0	0.0173409
7584	195.743	1	0	1	0	0	0	0.017426
7586	195.777	1	0	1	0	0	0	0.0175079
7588	195.81	1	0	1	0	0	0	0.0175205
7590	195.843	1	0	1	0	0	0	0.0174127
7592	195.877	1	0	1	0	0	0	0.0173256
7594	195.91	1	0	1	0	0	0	0.0174371
7596	195.943	1	0	1	0	0	0	0.0173043
7598	195.977	1	0	1	0	0	0	0.0172213
7600	196.01	1	0	1	0	0	0	0.0171822
7602	196.043	1	0	1	0	0	0	0.0172311
7604	196.077	1	0	1	0	0	0	0.0173102
7606	196.11	1	0	1	0	0	0	0.0172129
7608	196.143	1	0	1	0	0	0	0.0172854
7610	196.177	1	0	1	0	0	0	0.0174703
7612	196.21	1	0	1	0	0	0	0.0173824
7614	196.243	1	0	1	0	0	0	0.0173793
7616	196.277	1	0	1	0	0	0	0.017382
7618	196.31	1	0	1	0	0	0	0.0174277
7620	196.343	1	0	1	0	0	0	0.017389
7622	196.377	1	0	1	0	0	0	0.0172945
7624	196.41	1	0	1	0	0	0	0.017397
7626	196.443	1	0	1	0	0	0	0.0174636
7628	196.477	1	0	1	0	0	0	0.0174026
7630	196.51	1	0	1	0	0	0	0.0174664
7632	196.543	1	0	1	0	0	0	0.0175003
7634	196.577	1	0	1	0	0	0	0.017389
7636	196.61	1	0	1	0	0	0	0.0175703
7638	196.643	1	0	1	0	0	0	0.0175194
7640	196.677	1	0	1	0	0	0	0.0173915
7642	196.71	1	0	1	0	0	0	0.0174936
7644	196.743	1	0	1	0	0	0	0.0174459
7646	196.777	1	0	1	0	0	0	0.01732
7648	196.81	1	0	1	0	0	0	0.0174633
7650	196.843	1	0	1	0	0	0	0.0172896
7652	196.877	1	0	1	0	0	0	0.0172997
7654	196.91	1	0	1	0	0	0	0.017494
7656	196.943	1	0	1	0	0	0	0.017426
7658	196.977	1	0	1	0	0	0	0.0173419
7660	197.01	1	0	1	0	0	0	0.0173772
7662	197.043	1	0	1	0	0	0	0.0173249
7664	197.077	1	0	1	0	0	0	0.0172328
7666	197.11	1	0	1	0	0	0	0.0174626
7668	197.143	1	0	1	0	0	0	0.0173834
7670	197.177	1	0	1	0	0	0	0.0172687
7672	197.21	1	0	1	0	0	0	0.0173859
7674	197.243	1	0	1	0	0	0	0.0173388
7676	197.277	1	0	1	0	0	0	0.0172715
7678	197.31	1	0	1	0	0	0	0.0173758
7680	197.343	1	0	1	0	0	0	0.0174026
7682	197.377	1	0	1	0	0	0	0.017335
7684	197.41	1	0	1	0	0	0	0.0175215
7686	197.443	1	0	1	0	0	0	0.0173632
7688	197.477	1	0	1	0	0	0	0.0173207
7690	197.51	1	0	1	0	0	0	0.0176014
7692	197.543	1	0	1	0	0	0	0.0174856
7694	197.577	1	0	1	0	0	0	0.0174912
7696	197.61	1	0	1	0	0	0	0.0175016
7698	197.643	1	0	1	0	0	0	0.017442
7700	197.677	1	0	1	0	0	0	0.0173922
7702	197.71	1	0	1	0	0	0	0.0175184
7704	197.743	1	0	1	0	0	0	0.0172687
7706	197.777	1	0	1	0	0	0	0.0172073
7708	197.81	1	0	1	0	0	0	0.0173862
7710	197.843	1	0	1	0	0	0	0.0172701
7712	197.877	1	0	1	0	0	0	0.0172014
7714	197.91	1	0	1	0	0	0	0.017351
7716	197.943	1	0	1	0	0	0	0.017193
7718	197.977	1	0	1	0	0	0	0.0171379
7720	198.01	1	0	1	0	0	0	0.0173193
7722	198.043	1	0	1	0	0	0	0.0171965
7724	198.077	1	0	1	0	0	0	0.0171794
7726	198.11	1	0	1	0	0	0	0.0172746
7728	198.143	1	0	1	0	0	0	0.0173214
7730	198.177	1	0	1	0	0	0	0.0173301
7732	198.21	1	0	1	0	0	0	0.0172098
7734	198.243	1	0	1	0	0	0	0.0173081
7736	198.277	1	0	1	0	0	0	0.0172356
7738	198.31	1	0	1	0	0	0	0.0173524
7740	198.343	1	0	1	0	0	0	0.0175442
7742	198.377	1	0	1	0	0	0	0.0175745
7744	198.41	1	0	1	0	0	0	0.0174323
7746	198.443	1	0	1	0	0	0	0.0175041
7748	198.477	1	0	1	0	0	0	0.0176282
7750	198.51	1	0	1	0	0	0	0.0175644
7752	198.543	1	0	1	0	0	0	0.0175672
7754	198.577	1	0	1	0	0	0	0.0174762
7756	198.61	1	0	1	0	0	0	0.017397
7758	198.643	1	0	1	0	0	0	0.0173158
7760	198.677	1	0	1	0	0	0	0.0172854
7762	198.71	1	0	1	0	0	0	0.0170114
7764	198.743	1	0	1	0	0	0	0.0172059
7766	198.777	1	0	1	0	0	0	0.0172028
7768	198.81	1	0	1	0	0	0	0.0172021
7770	198.843	1	0	1	0	0	0	0.0172192
7772	198.877	1	0	1	0	0	0	0.0172216
7774	198.91	1	0	1	0	0	0	0.0171121
7776	198.943	1	0	1	0	0	0	0.0171407
7778	198.977	1	0	1	0	0	0	0.017397
7780	199.01	1	0	1	0	0	0	0.0174117
7782	199.043	1	0	1	0	0	0	0.017525
7784	199.077	1	0	1	0	0	0	0.0175592
7786	199.11	1	0	1	0	0	0	0.017585
7788	199.143	1	0	1	0	0	0	0.0175819
7790	199.177	1	0	1	0	0	0	0.0175393
7792	199.21	1	0	1	0	0	0	0.017472
7794	199.243	1	0	1	0	0	0	0.01729
7796	199.277	1	0	1	0	0	0	0.0173409
7798	199.31	1	0	1	0	0	0	0.0173527
7800	199.343	1	0	1	0	0	0	0.0173357
7802	199.377	1	0	1	0	0	0	0.0172732
7804	199.41	1	0	1	0	0	0	0.0173238
7806	199.443	1	0	1	0	0	0	0.0174078
7808	199.477	1	0	1	0	0	0	0.0174403
7810	199.51	1	0	1	0	0	0	0.0173688
7812	199.543	1	0	1	0	0	0	0.0175316
7814	199.577	1	0	1	0	0	0	0.017396
7816	199.61	1	0	1	0	0	0	0.017147
7818	199.643	1	0	1	0	0	0	0.0172523
7820	199.677	1	0	1	0	0	0	0.0172875
7822	199.71	1	0	1	0	0	0	0.0172209
7824	199.743	1	0	1	0	0	0	0.0172178
7826	199.777	1	0	1	0	0	0	0.0173242
7828	199.81	1	0	1	0	0	0	0.0172331
7830	199.843	1	0	1	0	0	0	0.0172094
7832	199.877	1	0	1	0	0	0	0.0173855
7834	199.91	1	0	1	0	0	0	0.0175498
7836	199.943	1	0	1	0	0	0	0.017669
7838	199.977	1	0	1	0	0	0	0.0177269
7840	200.01	1	0	1	0	0	0	0.0178092
7842	200.043	1	0	1	0	0	0	0.0177461
7844	200.077	1	0	1	0	0	0	0.0177586
7846	200.11	1	0	1	0	0	0	0.0177722
7848	200.143	1	0	1	0	0	0	0.0176115
7850	200.177	1	0	1	0	0	0	0.0175965
7852	200.21	1	0	1	0	0	0	0.0175125
7854	200.243	1	0	1	0	0	0	0.0174584
7856	200.277	1	0	1	0	0	0	0.0173381
7858	200.31	1	0	1	0	0	0	0.0171254
7860	200.343	1	0	1	0	0	0	0.0172
7862	200.377	1	0	1	0	0	0	0.0174584
7864	200.41	1	0	1	0	0	0	0.0174919
7866	200.443	1	0	1	0	0	0	0.017418
7868	200.477	1	0	1	0	0	0	0.0173552
7870	200.51	1	0	1	0	0	0	0.0173817
7872	200.543	1	0	1	0	0	0	0.0171903
7874	200.577	1	0	1	0	0	0	0.0172401
7876	200.61	1	0	1	0	0	0	0.0173224
7878	200.643	1	0	1	0	0	0	0.0172133
7880	200.677	1	0	1	0	0	0	0.0171787
7882	200.71	1	0	1	0	0	0	0.0171784
7884	200.743	1	0	1	0	0	0	0.0173378
7886	200.777	1	0	1	0	0	0	0.0173374
7888	200.81	1	0	1	0	0	0	0.0173242
7890	200.843	1	0	1	0	0	0	0.0174103
7892	200.877	1	0	1	0	0	0	0.0174643
7894	200.91	1	0	1	0	0	0	0.0174131
7896	200.943	1	0	1	0	0	0	0.0174082
7898	200.977	1	0	1	0	0	0	0.0173378
7900	201.01	1	0	1	0	0	0	0.0174228
7902	201.043	1	0	1	0	0	0	0.0175212
7904	201.077	1	0	1	0	0	0	0.0174769
7906	201.11	1	0	1	0	0	0	0.0173887
7908	201.143	1	0	1	0	0	0	0.0172722
7910	201.177	1	0	1	0	0	0	0.01711
7912	201.21	1	0	1	0	0	0	0.0171791
7914	201.243	1	0	1	0	0	0	0.0171442
7916	201.277	1	0	1	0	0	0	0.0171076
7918	201.31	1	0	1	0	0	0	0.0172492
7920	201.343	1	0	1	0	0	0	0.0174406
7922	201.377	1	0	1	0	0	0	0.0173004
7924	201.41	1	0	1	0	0	0	0.0173371
7926	201.443	1	0	1	0	0	0	0.0172136
7928	201.477	1	0	1	0	0	0	0.0172771
7930	201.51	1	0	1	0	0	0	0.017306
7932	201.543	1	0	1	0	0	0	0.0172872
7934	201.577	1	0	1	0	0	0	0.0171993
7936	201.61	1	0	1	0	0	0	0.0172656
7938	201.643	1	0	1	0	0	0	0.0171714
7940	201.677	1	0	1	0	0	0	0.0170093
7942	201.71	1	0	1	0	0	0	0.017229
7944	201.743	1	0	1	0	0	0	0.017267
7946	201.777	1	0	1	0	0	0	0.017373
7948	201.81	1	0	1	0	0	0	0.0172809
7950	201.843	1	0	1	0	0	0	0.0172366
7952	201.877	1	0	1	0	0	0	0.0173221
7954	201.91	1	0	1	0	0	0	0.017435
7956	201.943	1	0	1	0	0	0	0.0174082
7958	201.977	1	0	1	0	0	0	0.0173974
7960	202.01	1	0	1	0	0	0	0.0175159
7962	202.043	1	0	1	0	0	0	0.0175588
7964	202.077	1	0	1	0	0	0	0.0177168
7966	202.11	1	0	1	0	0	0	0.0178214
7968	202.143	1	0	1	0	0	0	0.0178939
7970	202.177	1	0	1	0	0	0	0.0178134
7972	202.21	1	0	1	0	0	0	0.0177639
7974	202.243	1	0	1	0	0	0	0.0177342
7976	202.277	1	0	1	0	0	0	0.0175864
7978	202.31	1	0	1	0	0	0	0.0176007
7980	202.343	1	0	1	0	0	0	0.0177039
7982	202.377	1	0	1	0	0	0	0.0176167
7984	202.41	1	0	1	0	0	0	0.0175044
7986	202.443	1	0	1	0	0	0	0.0175498
7988	202.477	1	0	1	0	0	0	0.017442
7990	202.51	1	0	1	0	0	0	0.017495
7992	202.543	1	0	1	0	0	0	0.0174989
7994	202.577	1	0	1	0	0	0	0.0175358
7996	202.61	1	0	1	0	0	0	0.0175016
7998	202.643	1	0	1	0	0	0	0.0175271
8000	202.677	1	0	1	0	0	0	0.0175125
8002	202.71	1	0	1	0	0	0	0.0175187
8004	202.743	1	0	1	0	0	0	0.0175281
8006	202.777	1	0	1	0	0	0	0.0173838
8008	202.81	1	0	1	0	0	0	0.0174832
8010	202.843	1	0	1	0	0	0	0.0174762
8012	202.877	1	0	1	0	0	0	0.0175337
8014	202.91	1	0	1	0	0	0	0.0174978
8016	202.943	1	0	1	0	0	0	0.0174755
8018	202.977	1	0	1	0	0	0	0.0174818
8020	203.01	1	0	1	0	0	0	0.0174504
8022	203.043	1	0	1	0	0	0	0.0174267
8024	203.077	1	0	1	0	0	0	0.0174389
8026	203.11	1	0	1	0	0	0	0.017525
8028	203.143	1	0	1	0	0	0	0.0174853
8030	203.177	1	0	1	0	0	0	0.0175592
8032	203.21	1	0	1	0	0	0	0.0175058
8034	203.243	1	0	1	0	0	0	0.0174832
8036	203.277	1	0	1	0	0	0	0.01745
8038	203.31	1	0	1	0	0	0	0.0174874
8040	203.343	1	0	1	0	0	0	0.0174727
8042	203.377	1	0	1	0	0	0	0.0174092
8044	203.41	1	0	1	0	0	0	0.0175055
8046	203.443	1	0	1	0	0	0	0.0175034
8048	203.477	1	0	1	0	0	0	0.0175041
8050	203.51	1	0	1	0	0	0	0.0175104
8052	203.543	1	0	1	0	0	0	0.0175156
8054	203.577	1	0	1	0	0	0	0.0175414
8056	203.61	1	0	1	0	0	0	0.017494
8058	203.643	1	0	1	0	0	0	0.0174748
8060	203.677	1	0	1	0	0	0	0.017675
8062	203.71	1	0	1	0	0	0	0.0175836
8064	203.743	1	0	1	0	0	0	0.0176498
8066	203.777	1	0	1	0	0	0	0.0176359
8068	203.81	1	0	1	0	0	0	0.0176261
8070	203.843	1	0	1	0	0	0	0.0176178
8072	203.877	1	0	1	0	0	0	0.0175369
8074	203.91	1	0	1	0	0	0	0.017556
8076	203.943	1	0	1	0	0	0	0.0176052
8078	203.976	1	0	1	0	0	0	0.0175348
8080	204.01	1	0	1	0	0	0	0.0175093
8082	204.043	1	0	1	0	0	0	0.0175477
8084	204.076	1	0	1	0	0	0	0.017442
8086	204.11	1	0	1	0	0	0	0.0172049
8088	204.143	1	0	1	0	0	0	0.0173301
8090	204.176	1	0	1	0	0	0	0.0173538
8092	204.21	1	0	1	0	0	0	0.0172464
8094	204.243	1	0	1	0	0	0	0.0172715
8096	204.276	1	0	1	0	0	0	0.017215
8098	204.31	1	0	1	0	0	0	0.017169
8100	204.343	1	0	1	0	0	0	0.017351
8102	204.376	1	0	1	0	0	0	0.0173573
8104	204.41	1	0	1	0	0	0	0.0173904
8106	204.443	1	0	1	0	0	0	0.0175313
8108	204.476	1	0	1	0	0	0	0.0174532
8110	204.51	1	0	1	0	0	0	0.0176328
8112	204.543	1	0	1	0	0	0	0.017571
8114	204.576	1	0	1	0	0	0	0.0175923
8116	204.61	1	0	1	0	0	0	0.0176097
8118	204.643	1	0	1	0	0	0	0.0175832
8120	204.676	1	0	1	0	0	0	0.017639
8122	204.71	1	0	1	0	0	0	0.0176202
8124	204.743	1	0	1	0	0	0	0.0176383
8126	204.776	1	0	1	0	0	0	0.0176104
8128	204.81	1	0	1	0	0	0	0.0176628
8130	204.843	1	0	1	0	0	0	0.0176383
8132	204.876	1	0	1	0	0	0	0.017586
8134	204.91	1	0	1	0	0	0	0.0175839
8136	204.943	1	0	1	0	0	0	0.0176237
8138	204.976	1	0	1	0	0	0	0.0175703
8140	205.01	1	0	1	0	0	0	0.0176342
8142	205.043	1	0	1	0	0	0	0.0176429
8144	205.076	1	0	1	0	0	0	0.0175996
8146	205.11	1	0	1	0	0	0	0.017622
8148	205.143	1	0	1	0	0	0	0.0175864
8150	205.176	1	0	1	0	0	0	0.0175923
8152	205.21	1	0	1	0	0	0	0.0175048
8154	205.243	1	0	1	0	0	0	0.0175819
8156	205.276	1	0	1	0	0	0	0.0175944
8158	205.31	1	0	1	0	0	0	0.0175731
8160	205.343	1	0	1	0	0	0	0.0176293
8162	205.376	1	0	1	0	0	0	0.0175655
8164	205.41	1	0	1	0	0	0	0.0176108
8166	205.443	1	0	1	0	0	0	0.0176097
8168	205.476	1	0	1	0	0	0	0.0175731
8170	205.51	1	0	1	0	0	0	0.0175288
8172	205.543	1	0	1	0	0	0	0.0175404
8174	205.576	1	0	1	0	0	0	0.0175086
8176	205.61	1	0	1	0	0	0	0.017554
8178	205.643	1	0	1	0	0	0	0.0175369
8180	205.676	1	0	1	0	0	0	0.0175355
8182	205.71	1	0	1	0	0	0	0.0175836
8184	205.743	1	0	1	0	0	0	0.0175093
8186	205.776	1	0	1	0	0	0	0.0175027
8188	205.81	1	0	1	0	0	0	0.0175316
8190	205.843	1	0	1	0	0	0	0.0175665
8192	205.876	1	0	1	0	0	0	0.0175055
8194	205.91	1	0	1	0	0	0	0.0175459
8196	205.943	1	0	1	0	0	0	0.0175278
8198	205.976	1	0	1	0	0	0	0.017548
8200	206.01	1	0	1	0	0	0	0.0175728
8202	206.043	1	0	1	0	0	0	0.0175268
8204	206.076	1	0	1	0	0	0	0.0175972
8206	206.11	1	0	1	0	0	0	0.0174971
8208	206.143	1	0	1	0	0	0	0.0174835
8210	206.176	1	0	1	0	0	0	0.0174825
8212	206.21	1	0	1	0	0	0	0.0175627
8214	206.243	1	0	1	0	0	0	0.0175268
8216	206.276	1	0	1	0	0	0	0.0175742
8218	206.31	1	0	1	0	0	0	0.0177008
8220	206.343	1	0	1	0	0	0	0.0177175
8222	206.376	1	0	1	0	0	0	0.0177911
8224	206.41	1	0	1	0	0	0	0.0177893
8226	206.443	1	0	1	0	0	0	0.0177579
8228	206.476	1	0	1	0	0	0	0.0177262
8230	206.51	1	0	1	0	0	0	0.0178165
8232	206.543	1	0	1	0	0	0	0.0178151
8234	206.576	1	0	1	0	0	0	0.0177471
8236	206.61	1	0	1	0	0	0	0.0177049
8238	206.643	1	0	1	0	0	0	0.0177178
8240	206.676	1	0	1	0	0	0	0.0177039
8242	206.71	1	0	1	0	0	0	0.0177081
8244	206.743	1	0	1	0	0	0	0.0177165
8246	206.776	1	0	1	0	0	0	0.0177688
8248	206.81	1	0	1	0	0	0	0.0177437
8250	206.843	1	0	1	0	0	0	0.0175927
8252	206.876	1	0	1	0	0	0	0.0176966
8254	206.91	1	0	1	0	0	0	0.0174804
8256	206.943	1	0	1	0	0	0	0.017435
8258	206.976	1	0	1	0	0	0	0.01754
8260	207.01	1	0	1	0	0	0	0.0175752
8262	207.043	1	0	1	0	0	0	0.0175428
8264	207.076	1	0	1	0	0	0	0.0174396
8266	207.11	1	0	1	0	0	0	0.0174793
8268	207.143	1	0	1	0	0	0	0.0173221
8270	207.176	1	0	1	0	0	0	0.0172785
8272	207.21	1	0	1	0	0	0	0.0172795
8274	207.243	1	0	1	0	0	0	0.0173391
8276	207.276	1	0	1	0	0	0	0.0173458
8278	207.31	1	0	1	0	0	0	0.0173657
8280	207.343	1	0	1	0	0	0	0.0174242
8282	207.376	1	0	1	0	0	0	0.0174535
8284	207.41	1	0	1	0	0	0	0.0173967
8286	207.443	1	0	1	0	0	0	0.0174598
8288	207.476	1	0	1	0	0	0	0.0175309
8290	207.51	1	0	1	0	0	0	0.0173977
8292	207.543	1	0	1	0	0	0	0.0173862
8294	207.576	1	0	1	0	0	0	0.0173765
8296	207.61	1	0	1	0	0	0	0.0173855
8298	207.643	1	0	1	0	0	0	0.0173604
8300	207.676	1	0	1	0	0	0	0.0173583
8302	207.71	1	0	1	0	0	0	0.0172921
8304	207.743	1	0	1	0	0	0	0.017412
8306	207.776	1	0	1	0	0	0	0.0175864
8308	207.81	1	0	1	0	0	0	0.0177018
8310	207.843	1	0	1	0	0	0	0.0177562
8312	207.876	1	0	1	0	0	0	0.0177921
8314	207.91	1	0	1	0	0	0	0.0177621
8316	207.943	1	0	1	0	0	0	0.0177314
8318	207.976	1	0	1	0	0	0	0.0177342
8320	208.01	1	0	1	0	0	0	0.0177974
8322	208.043	1	0	1	0	0	0	0.0176844
8324	208.076	1	0	1	0	0	0	0.0175431
8326	208.11	1	0	1	0	0	0	0.0175501
8328	208.143	1	0	1	0	0	0	0.0175623
8330	208.176	1	0	1	0	0	0	0.0175696
8332	208.21	1	0	1	0	0	0	0.0176554
8334	208.243	1	0	1	0	0	0	0.0176589
8336	208.276	1	0	1	0	0	0	0.0176544
8338	208.31	1	0	1	0	0	0	0.0176736
8340	208.343	1	0	1	0	0	0	0.0177363
8342	208.376	1	0	1	0	0	0	0.0176084
8344	208.41	1	0	1	0	0	0	0.0175683
8346	208.443	1	0	1	0	0	0	0.0175452
8348	208.476	1	0	1	0	0	0	0.0174343
8350	208.51	1	0	1	0	0	0	0.0173472
8352	208.543	1	0	1	0	0	0	0.0171547
8354	208.576	1	0	1	0	0	0	0.0173168
8356	208.61	1	0	1	0	0	0	0.0172781
8358	208.643	1	0	1	0	0	0	0.017229
8360	208.676	1	0	1	0	0	0	0.0172446
8362	208.71	1	0	1	0	0	0	0.0173517
8364	208.743	1	0	1	0	0	0	0.0173109
8366	208.776	1	0	1	0	0	0	0.0171386
8368	208.81	1	0	1	0	0	0	0.0171955
8370	208.843	1	0	1	0	0	0	0.0172255
8372	208.876	1	0	1	0	0	0	0.0171379
8374	208.91	1	0	1	0	0	0	0.0171198
8376	208.943	1	0	1	0	0	0	0.017299
8378	208.976	1	0	1	0	0	0	0.0173705
8380	209.01	1	0	1	0	0	0	0.0174874
8382	209.043	1	0	1	0	0	0	0.0174584
8384	209.076	1	0	1	0	0	0	0.0175125
8386	209.11	1	0	1	0	0	0	0.0174364
8388	209.143	1	0	1	0	0	0	0.0172154
8390	209.176	1	0	1	0	0	0	0.0173311
8392	209.21	1	0	1	0	0	0	0.0173008
8394	209.243	1	0	1	0	0	0	0.0171571
8396	209.276	1	0	1	0	0	0	0.0172481
8398	209.31	1	0	1	0	0	0	0.0171428
8400	209.343	1	0	1	0	0	0	0.0170431
8402	209.376	1	0	1	0	0	0	0.0170797
8404	209.41	1	0	1	0	0	0	0.0173053
8406	209.443	1	0	1	0	0	0	0.0174131
8408	209.476	1	0	1	0	0	0	0.0174016
8410	209.51	1	0	1	0	0	0	0.0175097
8412	209.543	1	0	1	0	0	0	0.0173398
8414	209.576	1	0	1	0	0	0	0.0173123
8416	209.61	1	0	1	0	0	0	0.0174047
8418	209.643	1	0	1	0	0	0	0.017282
8420	209.676	1	0	1	0	0	0	0.0171749
8422	209.71	1	0	1	0	0	0	0.0173144
8424	209.743	1	0	1	0	0	0	0.0170926
8426	209.776	1	0	1	0	0	0	0.0170992
8428	209.81	1	0	1	0	0	0	0.0172185
8430	209.843	1	0	1	0	0	0	0.0172548
8432	209.876	1	0	1	0	0	0	0.0171386
8434	209.91	1	0	1	0	0	0	0.0173339
8436	209.943	1	0	1	0	0	0	0.0175044
8438	209.976	1	0	1	0	0	0	0.0176199
8440	210.01	1	0	1	0	0	0	0.0176366
8442	210.043	1	0	1	0	0	0	0.017684
8444	210.076	1	0	1	0	0	0	0.017677
8446	210.11	1	0	1	0	0	0	0.0175623
8448	210.143	1	0	1	0	0	0	0.0175037
8450	210.176	1	0	1	0	0	0	0.0173827
8452	210.21	1	0	1	0	0	0	0.0174765
8454	210.243	1	0	1	0	0	0	0.0174497
8456	210.276	1	0	1	0	0	0	0.0174326
8458	210.31	1	0	1	0	0	0	0.0173133
8460	210.343	1	0	1	0	0	0	0.0174253
8462	210.376	1	0	1	0	0	0	0.0173981
8464	210.41	1	0	1	0	0	0	0.0174856
8466	210.443	1	0	1	0	0	0	0.017389
8468	210.476	1	0	1	0	0	0	0.0174431
8470	210.51	1	0	1	0	0	0	0.0173611
8472	210.543	1	0	1	0	0	0	0.0173046
8474	210.576	1	0	1	0	0	0	0.0173458
8476	210.61	1	0	1	0	0	0	0.0173705
8478	210.643	1	0	1	0	0	0	0.0172956
8480	210.676	1	0	1	0	0	0	0.0172764
8482	210.71	1	0	1	0	0	0	0.0173946
8484	210.743	1	0	1	0	0	0	0.0173099
8486	210.776	1	0	1	0	0	0	0.0172021
8488	210.81	1	0	1	0	0	0	0.0172649
8490	210.843	1	0	1	0	0	0	0.0172133
8492	210.876	1	0	1	0	0	0	0.0171972
8494	210.91	1	0	1	0	0	0	0.0172311
8496	210.943	1	0	1	0	0	0	0.017169
8498	210.976	1	0	1	0	0	0	0.0170797
8500	211.01	1	0	1	0	0	0	0.0172854
8502	211.043	1	0	1	0	0	0	0.0171665
8504	211.076	1	0	1	0	0	0	0.017034
8506	211.11	1	0	1	0	0	0	0.0171885
8508	211.143	1	0	1	0	0	0	0.0171742
8510	211.176	1	0	1	0	0	0	0.0170079
8512	211.21	1	0	1	0	0	0	0.0169939
8514	211.243	1	0	1	0	0	0	0.0171345
8516	211.276	1	0	1	0	0	0	0.016973
8518	211.31	1	0	1	0	0	0	0.0170706
8520	211.343	1	0	1	0	0	0	0.0173412
8522	211.376	1	0	1	0	0	0	0.0174731
8524	211.41	1	0	1	0	0	0	0.0175288
8526	211.443	1	0	1	0	0	0	0.0175941
8528	211.476	1	0	1	0	0	0	0.0176349
8530	211.51	1	0	1	0	0	0	0.0174992
8532	211.543	1	0	1	0	0	0	0.0174692
8534	211.576	1	0	1	0	0	0	0.0174253
8536	211.61	1	0	1	0	0	0	0.0174765
8538	211.643	1	0	1	0	0	0	0.0174051
8540	211.676	1	0	1	0	0	0	0.017441
8542	211.71	1	0	1	0	0	0	0.0175261
8544	211.743	1	0	1	0	0	0	0.0173716
8546	211.776	1	0	1	0	0	0	0.0173088
8548	211.81	1	0	1	0	0	0	0.0174183
8550	211.843	1	0	1	0	0	0	0.0172854
8552	211.876	1	0	1	0	0	0	0.0171962
8554	211.91	1	0	1	0	0	0	0.0173949
8556	211.943	1	0	1	0	0	0	0.0172433
8558	211.976	1	0	1	0	0	0	0.0172603
8560	212.01	1	0	1	0	0	0	0.017487
8562	212.043	1	0	1	0	0	0	0.0175784
8564	212.076	1	0	1	0	0	0	0.0175592
8566	212.11	1	0	1	0	0	0	0.0176007
8568	212.143	1	0	1	0	0	0	0.0176631
8570	212.176	1	0	1	0	0	0	0.0175766
8572	212.21	1	0	1	0	0	0	0.0175149
8574	212.243	1	0	1	0	0	0	0.0175874
8576	212.276	1	0	1	0	0	0	0.0175972
8578	212.31	1	0	1	0	0	0	0.017539
8580	212.343	1	0	1	0	0	0	0.0175132
8582	212.376	1	0	1	0	0	0	0.0175435
8584	212.41	1	0	1	0	0	0	0.017365
8586	212.443	1	0	1	0	0	0	0.0173629
8588	212.476	1	0	1	0	0	0	0.0175791
8590	212.509	1	0	1	0	0	0	0.0175348
8592	212.543	1	0	1	0	0	0	0.0174462
8594	212.576	1	0	1	0	0	0	0.0174954
8596	212.609	1	0	1	0	0	0	0.0174619
8598	212.643	1	0	1	0	0	0	0.0173806
8600	212.676	1	0	1	0	0	0	0.0172959
8602	212.709	1	0	1	0	0	0	0.0175226
8604	212.743	1	0	1	0	0	0	0.0174479
8606	212.776	1	0	1	0	0	0	0.0174256
8608	212.809	1	0	1	0	0	0	0.0174915
8610	212.843	1	0	1	0	0	0	0.0175613
8612	212.876	1	0	1	0	0	0	0.0174246
8614	212.909	1	0	1	0	0	0	0.0175093
8616	212.943	1	0	1	0	0	0	0.0175372
8618	212.976	1	0	1	0	0	0	0.0173956
8620	213.009	1	0	1	0	0	0	0.0174839
8622	213.043	1	0	1	0	0	0	0.0173325
8624	213.076	1	0	1	0	0	0	0.0173329
8626	213.109	1	0	1	0	0	0	0.0174267
8628	213.143	1	0	1	0	0	0	0.0173242
8630	213.176	1	0	1	0	0	0	0.0171944
8632	213.209	1	0	1	0	0	0	0.0173196
8634	213.243	1	0	1	0	0	0	0.0173747
8636	213.276	1	0	1	0	0	0	0.0172408
8638	213.309	1	0	1	0	0	0	0.0172924
8640	213.343	1	0	1	0	0	0	0.0173691
8642	213.376	1	0	1	0	0	0	0.017418
8644	213.409	1	0	1	0	0	0	0.0174019
8646	213.443	1	0	1	0	0	0	0.017366
8648	213.476	1	0	1	0	0	0	0.0174626
8650	213.509	1	0	1	0	0	0	0.0174207
8652	213.543	1	0	1	0	0	0	0.0174479
8654	213.576	1	0	1	0	0	0	0.0173677
8656	213.609	1	0	1	0	0	0	0.0175076
8658	213.643	1	0	1	0	0	0	0.0175076
8660	213.676	1	0	1	0	0	0	0.0174811
8662	213.709	1	0	1	0	0	0	0.0175417
8664	213.743	1	0	1	0	0	0	0.0175676
8666	213.776	1	0	1	0	0	0	0.0175784
8668	213.809	1	0	1	0	0	0	0.0175832
8670	213.843	1	0	1	0	0	0	0.0175313
8672	213.876	1	0	1	0	0	0	0.0176478
8674	213.909	1	0	1	0	0	0	0.0176795
8676	213.943	1	0	1	0	0	0	0.0174915
8678	213.976	1	0	1	0	0	0	0.0174867
8680	214.009	1	0	1	0	0	0	0.0175023
8682	214.043	1	0	1	0	0	0	0.0175853
8684	214.076	1	0	1	0	0	0	0.017554
8686	214.109	1	0	1	0	0	0	0.0176565
8688	214.143	1	0	1	0	0	0	0.0175083
8690	214.176	1	0	1	0	0	0	0.0175714
8692	214.209	1	0	1	0	0	0	0.017556
8694	214.243	1	0	1	0	0	0	0.0175086
8696	214.276	1	0	1	0	0	0	0.0175968
8698	214.309	1	0	1	0	0	0	0.0174553
8700	214.343	1	0	1	0	0	0	0.0174922
8702	214.376	1	0	1	0	0	0	0.0174814
8704	214.409	1	0	1	0	0	0	0.0173744
8706	214.443	1	0	1	0	0	0	0.0173067
8708	214.476	1	0	1	0	0	0	0.0174012
8710	214.509	1	0	1	0	0	0	0.0172694
8712	214.543	1	0	1	0	0	0	0.0171986
8714	214.576	1	0	1	0	0	0	0.017403
8716	214.609	1	0	1	0	0	0	0.0173235
8718	214.643	1	0	1	0	0	0	0.017367
8720	214.676	1	0	1	0	0	0	0.0174664
8722	214.709	1	0	1	0	0	0	0.0173472
8724	214.743	1	0	1	0	0	0	0.017299
8726	214.776	1	0	1	0	0	0	0.0174563
8728	214.809	1	0	1	0	0	0	0.0173541
8730	214.843	1	0	1	0	0	0	0.0173378
8732	214.876	1	0	1	0	0	0	0.017359
8734	214.909	1	0	1	0	0	0	0.0173601
8736	214.943	1	0	1	0	0	0	0.0174235
8738	214.976	1	0	1	0	0	0	0.0174636
8740	215.009	1	0	1	0	0	0	0.0174608
8742	215.043	1	0	1	0	0	0	0.0174424
8744	215.076	1	0	1	0	0	0	0.0175599
8746	215.109	1	0	1	0	0	0	0.0174525
8748	215.143	1	0	1	0	0	0	0.0173768
8750	215.176	1	0	1	0	0	0	0.0174846
8752	215.209	1	0	1	0	0	0	0.0174103
8754	215.243	1	0	1	0	0	0	0.0173793
8756	215.276	1	0	1	0	0	0	0.0175198
8758	215.309	1	0	1	0	0	0	0.0174228
8760	215.343	1	0	1	0	0	0	0.0173908
8762	215.376	1	0	1	0	0	0	0.0174671
8764	215.409	1	0	1	0	0	0	0.0173562
8766	215.443	1	0	1	0	0	0	0.0174173
8768	215.476	1	0	1	0	0	0	0.0173775
8770	215.509	1	0	1	0	0	0	0.0172942
8772	215.543	1	0	1	0	0	0	0.0175369
8774	215.576	1	0	1	0	0	0	0.0174082
8776	215.609	1	0	1	0	0	0	0.017374
8778	215.643	1	0	1	0	0	0	0.0173437
8780	215.676	1	0	1	0	0	0	0.0174155
8782	215.709	1	0	1	0	0	0	0.0174016
8784	215.743	1	0	1	0	0	0	0.0174054
8786	215.776	1	0	1	0	0	0	0.0175431
8788	215.809	1	0	1	0	0	0	0.0174675
8790	215.843	1	0	1	0	0	0	0.0174622
8792	215.876	1	0	1	0	0	0	0.01763
8794	215.909	1	0	1	0	0	0	0.0174218
8796	215.943	1	0	1	0	0	0	0.0174514
8798	215.976	1	0	1	0	0	0	0.017503
8800	216.009	1	0	1	0	0	0	0.017365
8802	216.043	1	0	1	0	0	0	0.0173779
8804	216.076	1	0	1	0	0	0	0.0173583
8806	216.109	1	0	1	0	0	0	0.0173824
8808	216.143	1	0	1	0	0	0	0.0173468
8810	216.176	1	0	1	0	0	0	0.0173754
8812	216.209	1	0	1	0	0	0	0.0173015
8814	216.243	1	0	1	0	0	0	0.0173657
8816	216.276	1	0	1	0	0	0	0.0174005
8818	216.309	1	0	1	0	0	0	0.0174982
8820	216.343	1	0	1	0	0	0	0.0175843
8822	216.376	1	0	1	0	0	0	0.0174846
8824	216.409	1	0	1	0	0	0	0.0175076
8826	216.443	1	0	1	0	0	0	0.0175958
8828	216.476	1	0	1	0	0	0	0.0175543
8830	216.509	1	0	1	0	0	0	0.0176
8832	216.543	1	0	1	0	0	0	0.0176397
8834	216.576	1	0	1	0	0	0	0.0175689
8836	216.609	1	0	1	0	0	0	0.0175547
8838	216.643	1	0	1	0	0	0	0.017623
8840	216.676	1	0	1	0	0	0	0.0175658
8842	216.709	1	0	1	0	0	0	0.0175369
8844	216.743	1	0	1	0	0	0	0.0176136
8846	216.776	1	0	1	0	0	0	0.0175285
8848	216.809	1	0	1	0	0	0	0.0174277
8850	216.843	1	0	1	0	0	0	0.0176045
8852	216.876	1	0	1	0	0	0	0.0173831
8854	216.909	1	0	1	0	0	0	0.0174096
8856	216.943	1	0	1	0	0	0	0.0175247
8858	216.976	1	0	1	0	0	0	0.0173262
8860	217.009	1	0	1	0	0	0	0.0172997
8862	217.043	1	0	1	0	0	0	0.0173806
8864	217.076	1	0	1	0	0	0	0.0173004
8866	217.109	1	0	1	0	0	0	0.0172237
8868	217.143	1	0	1	0	0	0	0.0173719
8870	217.176	1	0	1	0	0	0	0.0172464
8872	217.209	1	0	1	0	0	0	0.0172018
8874	217.243	1	0	1	0	0	0	0.0169967
8876	217.276	1	0	1	0	0	0	0.0171756
8878	217.309	1	0	1	0	0	0	0.0171104
8880	217.343	1	0	1	0	0	0	0.0170755
8882	217.376	1	0	1	0	0	0	0.017184
8884	217.409	1	0	1	0	0	0	0.0173315
8886	217.443	1	0	1	0	0	0	0.0174249
8888	217.476	1	0	1	0	0	0	0.0174316
8890	217.509	1	0	1	0	0	0	0.0175114
8892	217.543	1	0	1	0	0	0	0.017533
8894	217.576	1	0	1	0	0	0	0.017404
8896	217.609	1	0	1	0	0	0	0.0172579
8898	217.643	1	0	1	0	0	0	0.0172408
8900	217.676	1	0	1	0	0	0	0.0170068
8902	217.709	1	0	1	0	0	0	0.0169678
8904	217.743	1	0	1	0	0	0	0.0169134
8906	217.776	1	0	1	0	0	0	0.0169148
8908	217.809	1	0	1	0	0	0	0.0169315
8910	217.843	1	0	1	0	0	0	0.0169437
8912	217.876	1	0	1	0	0	0	0.0169172
8914	217.909	1	0	1	0	0	0	0.0168994
8916	217.943	1	0	1	0	0	0	0.0169183
8918	217.976	1	0	1	0	0	0	0.0169496
8920	218.009	1	0	1	0	0	0	0.0168851
8922	218.043	1	0	1	0	0	0	0.0170145
8924	218.076	1	0	1	0	0	0	0.0171993
8926	218.109	1	0	1	0	0	0	0.0171819
8928	218.143	1	0	1	0	0	0	0.0171052
8930	218.176	1	0	1	0	0	0	0.0170804
8932	218.209	1	0	1	0	0	0	0.0170033
8934	218.243	1	0	1	0	0	0	0.0171313
8936	218.276	1	0	1	0	0	0	0.0172541
8938	218.309	1	0	1	0	0	0	0.0172673
8940	218.343	1	0	1	0	0	0	0.0173747
8942	218.376	1	0	1	0	0	0	0.0175215
8944	218.409	1	0	1	0	0	0	0.0176432
8946	218.443	1	0	1	0	0	0	0.0176607
8948	218.476	1	0	1	0	0	0	0.0176485
8950	218.509	1	0	1	0	0	0	0.0175881
8952	218.543	1	0	1	0	0	0	0.017683
8954	218.576	1	0	1	0	0	0	0.0176146
8956	218.609	1	0	1	0	0	0	0.0174602
8958	218.643	1	0	1	0	0	0	0.0176167
8960	218.676	1	0	1	0	0	0	0.0174804
8962	218.709	1	0	1	0	0	0	0.0174504
8964	218.743	1	0	1	0	0	0	0.0176638
8966	218.776	1	0	1	0	0	0	0.0176017
8968	218.809	1	0	1	0	0	0	0.0175156
8970	218.843	1	0	1	0	0	0	0.0176872
8972	218.876	1	0	1	0	0	0	0.0176244
8974	218.909	1	0	1	0	0	0	0.0175128
8976	218.943	1	0	1	0	0	0	0.0175874
8978	218.976	1	0	1	0	0	0	0.017312
8980	219.009	1	0	1	0	0	0	0.0173929
8982	219.043	1	0	1	0	0	0	0.017487
8984	219.076	1	0	1	0	0	0	0.0172244
8986	219.109	1	0	1	0	0	0	0.017222
8988	219.143	1	0	1	0	0	0	0.0174399
8990	219.176	1	0	1	0	0	0	0.0172837
8992	219.209	1	0	1	0	0	0	0.0173186
8994	219.243	1	0	1	0	0	0	0.0174919
8996	219.276	1	0	1	0	0	0	0.0175118
8998	219.309	1	0	1	0	0	0	0.0173636
9000	219.343	1	0	1	0	0	0	0.0174047
9002	219.376	1	0	1	0	0	0	0.0172945
9004	219.409	1	0	1	0	0	0	0.0170584
9006	219.443	1	0	1	0	0	0	0.0172691
9008	219.476	1	0	1	0	0	0	0.0171484
9010	219.509	1	0	1	0	0	0	0.0169782
9012	219.543	1	0	1	0	0	0	0.0171059
9014	219.576	1	0	1	0	0	0	0.0174455
9016	219.609	1	0	1	0	0	0	0.0175142
9018	219.643	1	0	1	0	0	0	0.0173991
9020	219.676	1	0	1	0	0	0	0.0175093
9022	219.709	1	0	1	0	0	0	0.0173287
9024	219.743	1	0	1	0	0	0	0.0172066
9026	219.776	1	0	1	0	0	0	0.0173705
9028	219.809	1	0	1	0	0	0	0.0173126
9030	219.843	1	0	1	0	0	0	0.0171261
9032	219.876	1	0	1	0	0	0	0.0170794
9034	219.909	1	0	1	0	0	0	0.0172778
9036	219.943	1	0	1	0	0	0	0.0172903
9038	219.976	1	0	1	0	0	0	0.0172377
9040	220.009	1	0	1	0	0	0	0.0174978
9042	220.043	1	0	1	0	0	0	0.0175111
9044	220.076	1	0	1	0	0	0	0.0174884
9046	220.109	1	0	1	0	0	0	0.0173106
9048	220.143	1	0	1	0	0	0	0.0173304
9050	220.176	1	0	1	0	0	0	0.0172136
9052	220.209	1	0	1	0	0	0	0.0171847
9054	220.242	1	0	1	0	0	0	0.0172276
9056	220.276	1	0	1	0	0	0	0.0173831
9058	220.309	1	0	1	0	0	0	0.0173674
9060	220.342	1	0	1	0	0	0	0.0174692
9062	220.376	1	0	1	0	0	0	0.0174734
9064	220.409	1	0	1	0	0	0	0.017449
9066	220.442	1	0	1	0	0	0	0.0173667
9068	220.476	1	0	1	0	0	0	0.0172705
9070	220.509	1	0	1	0	0	0	0.0173266
9072	220.542	1	0	1	0	0	0	0.0173545
9074	220.576	1	0	1	0	0	0	0.0174197
9076	220.609	1	0	1	0	0	0	0.0175393
9078	220.642	1	0	1	0	0	0	0.0174281
9080	220.676	1	0	1	0	0	0	0.0172875
9082	220.709	1	0	1	0	0	0	0.0172725
9084	220.742	1	0	1	0	0	0	0.0173949
9086	220.776	1	0	1	0	0	0	0.0173147
9088	220.809	1	0	1	0	0	0	0.0174194
9090	220.842	1	0	1	0	0	0	0.017479
9092	220.876	1	0	1	0	0	0	0.0174037
9094	220.909	1	0	1	0	0	0	0.0173601
9096	220.942	1	0	1	0	0	0	0.0174452
9098	220.976	1	0	1	0	0	0	0.0173015
9100	221.009	1	0	1	0	0	0	0.0171146
9102	221.042	1	0	1	0	0	0	0.0171589
9104	221.076	1	0	1	0	0	0	0.0171393
9106	221.109	1	0	1	0	0	0	0.0170264
9108	221.142	1	0	1	0	0	0	0.0169584
9110	221.176	1	0	1	0	0	0	0.0171421
9112	221.209	1	0	1	0	0	0	0.0170278
9114	221.242	1	0	1	0	0	0	0.0170553
9116	221.276	1	0	1	0	0	0	0.0169727
9118	221.309	1	0	1	0	0	0	0.0169043
9120	221.342	1	0	1	0	0	0	0.0170002
9122	221.376	1	0	1	0	0	0	0.0170923
9124	221.409	1	0	1	0	0	0	0.017214
9126	221.442	1	0	1	0	0	0	0.0173095
9128	221.476	1	0	1	0	0	0	0.0174738
9130	221.509	1	0	1	0	0	0	0.0175027
9132	221.542	1	0	1	0	0	0	0.0175362
9134	221.576	1	0	1	0	0	0	0.0175731
9136	221.609	1	0	1	0	0	0	0.0175571
9138	221.642	1	0	1	0	0	0	0.0174399
9140	221.676	1	0	1	0	0	0	0.0174811
9142	221.709	1	0	1	0	0	0	0.017509
9144	221.742	1	0	1	0	0	0	0.0174685
9146	221.776	1	0	1	0	0	0	0.0174825
9148	221.809	1	0	1	0	0	0	0.0173772
9150	221.842	1	0	1	0	0	0	0.017441
9152	221.876	1	0	1	0	0	0	0.0173929
9154	221.909	1	0	1	0	0	0	0.0173639
9156	221.942	1	0	1	0	0	0	0.0173939
9158	221.976	1	0	1	0	0	0	0.017418
9160	222.009	1	0	1	0	0	0	0.0175055
9162	222.042	1	0	1	0	0	0	0.0175846
9164	222.076	1	0	1	0	0	0	0.0174734
9166	222.109	1	0	1	0	0	0	0.0173615
9168	222.142	1	0	1	0	0	0	0.0173911
9170	222.176	1	0	1	0	0	0	0.0173067
9172	222.209	1	0	1	0	0	0	0.0172638
9174	222.242	1	0	1	0	0	0	0.0172809
9176	222.276	1	0	1	0	0	0	0.0173099
9178	222.309	1	0	1	0	0	0	0.0173179
9180	222.342	1	0	1	0	0	0	0.0173468
9182	222.376	1	0	1	0	0	0	0.0174302
9184	222.409	1	0	1	0	0	0	0.0174553
9186	222.442	1	0	1	0	0	0	0.0174919
9188	222.476	1	0	1	0	0	0	0.0174867
9190	222.509	1	0	1	0	0	0	0.0174044
9192	222.542	1	0	1	0	0	0	0.0175376
9194	222.576	1	0	1	0	0	0	0.0175456
9196	222.609	1	0	1	0	0	0	0.0174696
9198	222.642	1	0	1	0	0	0	0.0175125
9200	222.676	1	0	1	0	0	0	0.0174553
9202	222.709	1	0	1	0	0	0	0.0174403
9204	222.742	1	0	1	0	0	0	0.017434
9206	222.776	1	0	1	0	0	0	0.0174797
9208	222.809	1	0	1	0	0	0	0.0174214
9210	222.842	1	0	1	0	0	0	0.0174201
9212	222.876	1	0	1	0	0	0	0.0175093
9214	222.909	1	0	1	0	0	0	0.0174549
9216	222.942	1	0	1	0	0	0	0.0174493
9218	222.976	1	0	1	0	0	0	0.0174504
9220	223.009	1	0	1	0	0	0	0.0174462
9222	223.042	1	0	1	0	0	0	0.0174382
9224	223.076	1	0	1	0	0	0	0.0174445
9226	223.109	1	0	1	0	0	0	0.0174797
9228	223.142	1	0	1	0	0	0	0.0174825
9230	223.176	1	0	1	0	0	0	0.0174996
9232	223.209	1	0	1	0	0	0	0.0174514
9234	223.242	1	0	1	0	0	0	0.017449
9236	223.276	1	0	1	0	0	0	0.0174323
9238	223.309	1	0	1	0	0	0	0.0174832
9240	223.342	1	0	1	0	0	0	0.0174856
9242	223.376	1	0	1	0	0	0	0.0174556
9244	223.409	1	0	1	0	0	0	0.0174947
9246	223.442	1	0	1	0	0	0	0.0173869
9248	223.476	1	0	1	0	0	0	0.0174654
9250	223.509	1	0	1	0	0	0	0.017396
9252	223.542	1	0	1	0	0	0	0.0173468
9254	223.576	1	0	1	0	0	0	0.0172882
9256	223.609	1	0	1	0	0	0	0.0174507
9258	223.642	1	0	1	0	0	0	0.0174291
9260	223.676	1	0	1	0	0	0	0.0174448
9262	223.709	1	0	1	0	0	0	0.0172537
9264	223.742	1	0	1	0	0	0	0.0171313
9266	223.776	1	0	1	0	0	0	0.0170511
9268	223.809	1	0	1	0	0	0	0.0171725
9270	223.842	1	0	1	0	0	0	0.0170361
9272	223.876	1	0	1	0	0	0	0.0170822
9274	223.909	1	0	1	0	0	0	0.0174239
9276	223.942	1	0	1	0	0	0	0.0173834
9278	223.976	1	0	1	0	0	0	0.0174825
9280	224.009	1	0	1	0	0	0	0.0174825
9282	224.042	1	0	1	0	0	0	0.0175473
9284	224.076	1	0	1	0	0	0	0.0176146
9286	224.109	1	0	1	0	0	0	0.0175986
9288	224.142	1	0	1	0	0	0	0.0175449
9290	224.176	1	0	1	0	0	0	0.0175215
9292	224.209	1	0	1	0	0	0	0.0174772
9294	224.242	1	0	1	0	0	0	0.017578
9296	224.276	1	0	1	0	0	0	0.0174971
9298	224.309	1	0	1	0	0	0	0.0173601
9300	224.342	1	0	1	0	0	0	0.0172241
9302	224.376	1	0	1	0	0	0	0.0174068
9304	224.409	1	0	1	0	0	0	0.0173681
9306	224.442	1	0	1	0	0	0	0.0173123
9308	224.476	1	0	1	0	0	0	0.0172938
9310	224.509	1	0	1	0	0	0	0.017328
9312	224.542	1	0	1	0	0	0	0.0172328
9314	224.576	1	0	1	0	0	0	0.0171631
9316	224.609	1	0	1	0	0	0	0.0173294
9318	224.642	1	0	1	0	0	0	0.0173559
9320	224.676	1	0	1	0	0	0	0.017373
9322	224.709	1	0	1	0	0	0	0.0173165
9324	224.742	1	0	1	0	0	0	0.0172143
9326	224.776	1	0	1	0	0	0	0.017222
9328	224.809	1	0	1	0	0	0	0.0173287
9330	224.842	1	0	1	0	0	0	0.0172851
9332	224.876	1	0	1	0	0	0	0.0172513
9334	224.909	1	0	1	0	0	0	0.0171871
9336	224.942	1	0	1	0	0	0	0.0172485
9338	224.976	1	0	1	0	0	0	0.0173074
9340	225.009	1	0	1	0	0	0	0.0173779
9342	225.042	1	0	1	0	0	0	0.0174392
9344	225.076	1	0	1	0	0	0	0.0175271
9346	225.109	1	0	1	0	0	0	0.0175543
9348	225.142	1	0	1	0	0	0	0.0176202
9350	225.176	1	0	1	0	0	0	0.0176338
9352	225.209	1	0	1	0	0	0	0.0175477
9354	225.242	1	0	1	0	0	0	0.0175407
9356	225.276	1	0	1	0	0	0	0.0176338
9358	225.309	1	0	1	0	0	0	0.0175867
9360	225.342	1	0	1	0	0	0	0.0176659
9362	225.376	1	0	1	0	0	0	0.0176865
9364	225.409	1	0	1	0	0	0	0.0174071
9366	225.442	1	0	1	0	0	0	0.0174755
9368	225.476	1	0	1	0	0	0	0.0175808
9370	225.509	1	0	1	0	0	0	0.0176568
9372	225.542	1	0	1	0	0	0	0.0176425
9374	225.576	1	0	1	0	0	0	0.0176554
9376	225.609	1	0	1	0	0	0	0.017592
9378	225.642	1	0	1	0	0	0	0.0175766
9380	225.676	1	0	1	0	0	0	0.0176641
9382	225.709	1	0	1	0	0	0	0.0176844
9384	225.742	1	0	1	0	0	0	0.0176376
9386	225.776	1	0	1	0	0	0	0.0176349
9388	225.809	1	0	1	0	0	0	0.0175763
9390	225.842	1	0	1	0	0	0	0.017608
9392	225.876	1	0	1	0	0	0	0.0175784
9394	225.909	1	0	1	0	0	0	0.0174971
9396	225.942	1	0	1	0	0	0	0.0174863
9398	225.976	1	0	1	0	0	0	0.0177377
9400	226.009	1	0	1	0	0	0	0.0177328
9402	226.042	1	0	1	0	0	0	0.0179327
9404	226.076	1	0	1	0	0	0	0.0178444
9406	226.109	1	0	1	0	0	0	0.017835
9408	226.142	1	0	1	0	0	0	0.0180725
9410	226.176	1	0	1	0	0	0	0.0179811
9412	226.209	1	0	1	0	0	0	0.0179497
9414	226.242	1	0	1	0	0	0	0.0181475
9416	226.276	1	0	1	0	0	0	0.0178144
9418	226.309	1	0	1	0	0	0	0.0179281
9420	226.342	1	0	1	0	0	0	0.0181412
9422	226.376	1	0	1	0	0	0	0.0179633
9424	226.409	1	0	1	0	0	0	0.0177953
9426	226.442	1	0	1	0	0	0	0.017896
9428	226.476	1	0	1	0	0	0	0.0177081
9430	226.509	1	0	1	0	0	0	0.0177182
9432	226.542	1	0	1	0	0	0	0.0177719
9434	226.576	1	0	1	0	0	0	0.0178092
9436	226.609	1	0	1	0	0	0	0.0176955
9438	226.642	1	0	1	0	0	0	0.0177953
9440	226.676	1	0	1	0	0	0	0.0177419
9442	226.709	1	0	1	0	0	0	0.0176572
9444	226.742	1	0	1	0	0	0	0.0175142
9446	226.776	1	0	1	0	0	0	0.0177695
9448	226.809	1	0	1	0	0	0	0.0178144
9450	226.842	1	0	1	0	0	0	0.0175683
9452	226.876	1	0	1	0	0	0	0.0177022
9454	226.909	1	0	1	0	0	0	0.0176572
9456	226.942	1	0	1	0	0	0	0.0177433
9458	226.976	1	0	1	0	0	0	0.0178263
9460	227.009	1	0	1	0	0	0	0.0178912
9462	227.042	1	0	1	0	0	0	0.0177987
9464	227.076	1	0	1	0	0	0	0.0177144
9466	227.109	1	0	1	0	0	0	0.0176959
9468	227.142	1	0	1	0	0	0	0.0179728
9470	227.176	1	0	1	0	0	0	0.0175982
9472	227.209	1	0	1	0	0	0	0.0177001
9474	227.242	1	0	1	0	0	0	0.0176631
9476	227.276	1	0	1	0	0	0	0.0177611
9478	227.309	1	0	1	0	0	0	0.0178497
9480	227.342	1	0	1	0	0	0	0.0179386
9482	227.376	1	0	1	0	0	0	0.0178563
9484	227.409	1	0	1	0	0	0	0.0176185
9486	227.442	1	0	1	0	0	0	0.0176
9488	227.476	1	0	1	0	0	0	0.0174738
9490	227.509	1	0	1	0	0	0	0.0175351
9492	227.542	1	0	1	0	0	0	0.0178514
9494	227.576	1	0	1	0	0	0	0.0176547
9496	227.609	1	0	1	0	0	0	0.0175581
9498	227.642	1	0	1	0	0	0	0.0176254
9500	227.676	1	0	1	0	0	0	0.0176192
9502	227.709	1	0	1	0	0	0	0.0176868
9504	227.742	1	0	1	0	0	0	0.017881
9506	227.776	1	0	1	0	0	0	0.0177684
9508	227.809	1	0	1	0	0	0	0.0175512
9510	227.842	1	0	1	0	0	0	0.0175044
9512	227.876	1	0	1	0	0	0	0.0178116
9514	227.909	1	0	1	0	0	0	0.0177301
9516	227.942	1	0	1	0	0	0	0.0174985
9518	227.976	1	0	1	0	0	0	0.0176523
9520	228.009	1	0	1	0	0	0	0.0176805
9522	228.042	1	0	1	0	0	0	0.0176467
9524	228.076	1	0	1	0	0	0	0.0178925
9526	228.109	1	0	1	0	0	0	0.0178695
9528	228.142	1	0	1	0	0	0	0.0177067
9530	228.176	1	0	1	0	0	0	0.0175878
9532	228.209	1	0	1	0	0	0	0.0176073
9534	228.242	1	0	1	0	0	0	0.0177869
9536	228.276	1	0	1	0	0	0	0.0175261
9538	228.309	1	0	1	0	0	0	0.0176453
9540	228.342	1	0	1	0	0	0	0.0176718
9542	228.376	1	0	1	0	0	0	0.0176931
9544	228.409	1	0	1	0	0	0	0.0178772
9546	228.442	1	0	1	0	0	0	0.0179853
9548	228.476	1	0	1	0	0	0	0.0178347
9550	228.509	1	0	1	0	0	0	0.0177168
9552	228.542	1	0	1	0	0	0	0.0179522
9554	228.576	1	0	1	0	0	0	0.0178476
9556	228.609	1	0	1	0	0	0	0.0177196
9558	228.642	1	0	1	0	0	0	0.0177478
9560	228.675	1	0	1	0	0	0	0.0179061
9562	228.709	1	0	1	0	0	0	0.0177433
9564	228.742	1	0	1	0	0	0	0.0176108
9566	228.776	1	0	1	0	0	0	0.0177642
9568	228.809	1	0	1	0	0	0	0.0176879
9570	228.842	1	0	1	0	0	0	0.0177464
9572	228.875	1	0	1	0	0	0	0.0179609
9574	228.909	1	0	1	0	0	0	0.0177035
9576	228.942	1	0	1	0	0	0	0.0176498
9578	228.975	1	0	1	0	0	0	0.0177632
9580	229.009	1	0	1	0	0	0	0.0177388
9582	229.042	1	0	1	0	0	0	0.0176854
9584	229.075	1	0	1	0	0	0	0.0176233
9586	229.109	1	0	1	0	0	0	0.0176279
9588	229.142	1	0	1	0	0	0	0.0175916
9590	229.175	1	0	1	0	0	0	0.0177492
9592	229.209	1	0	1	0	0	0	0.0176858
9594	229.242	1	0	1	0	0	0	0.0176505
9596	229.275	1	0	1	0	0	0	0.0177091
9598	229.309	1	0	1	0	0	0	0.0179808
9600	229.342	1	0	1	0	0	0	0.0177677
9602	229.375	1	0	1	0	0	0	0.0176443
9604	229.409	1	0	1	0	0	0	0.0176275
9606	229.442	1	0	1	0	0	0	0.0177824
9608	229.475	1	0	1	0	0	0	0.0177248
9610	229.509	1	0	1	0	0	0	0.0178465
9612	229.542	1	0	1	0	0	0	0.0178524
9614	229.575	1	0	1	0	0	0	0.017502
9616	229.609	1	0	1	0	0	0	0.0176589
9618	229.642	1	0	1	0	0	0	0.0176307
9620	229.675	1	0	1	0	0	0	0.0176045
9622	229.709	1	0	1	0	0	0	0.0176195
9624	229.742	1	0	1	0	0	0	0.0177443
9626	229.775	1	0	1	0	0	0	0.0176547
9628	229.809	1	0	1	0	0	0	0.0175536
9630	229.842	1	0	1	0	0	0	0.0177342
9632	229.875	1	0	1	0	0	0	0.0178992
9634	229.909	1	0	1	0	0	0	0.0179825
9636	229.942	1	0	1	0	0	0	0.0178082
9638	229.975	1	0	1	0	0	0	0.0176777
9640	230.009	1	0	1	0	0	0	0.0176101
9642	230.042	1	0	1	0	0	0	0.0176101
9644	230.075	1	0	1	0	0	0	0.0173252
9646	230.109	1	0	1	0	0	0	0.0171515
9648	230.142	1	0	1	0	0	0	0.0173273
9650	230.175	1	0	1	0	0	0	0.0172914
9652	230.209	1	0	1	0	0	0	0.0171634
9654	230.242	1	0	1	0	0	0	0.0172209
9656	230.275	1	0	1	0	0	0	0.0173385
9658	230.309	1	0	1	0	0	0	0.0172659
9660	230.342	1	0	1	0	0	0	0.0172356
9662	230.375	1	0	1	0	0	0	0.0172359
9664	230.409	1	0	1	0	0	0	0.0171592
9666	230.442	1	0	1	0	0	0	0.0171934
9668	230.475	1	0	1	0	0	0	0.0173667
9670	230.509	1	0	1	0	0	0	0.0172481
9672	230.542	1	0	1	0	0	0	0.0171467
9674	230.575	1	0	1	0	0	0	0.0173813
9676	230.609	1	0	1	0	0	0	0.0172586
9678	230.642	1	0	1	0	0	0	0.0173367
9680	230.675	1	0	1	0	0	0	0.0174047
9682	230.709	1	0	1	0	0	0	0.0173203
9684	230.742	1	0	1	0	0	0	0.0173343
9686	230.775	1	0	1	0	0	0	0.0173991
9688	230.809	1	0	1	0	0	0	0.0173803
9690	230.842	1	0	1	0	0	0	0.0173266
9692	230.875	1	0	1	0	0	0	0.0174438
9694	230.909	1	0	1	0	0	0	0.0174884
9696	230.942	1	0	1	0	0	0	0.0173904
9698	230.975	1	0	1	0	0	0	0.0174302
9700	231.009	1	0	1	0	0	0	0.0174887
9702	231.042	1	0	1	0	0	0	0.0174877
9704	231.075	1	0	1	0	0	0	0.0174277
9706	231.109	1	0	1	0	0	0	0.0175696
9708	231.142	1	0	1	0	0	0	0.0175696
9710	231.175	1	0	1	0	0	0	0.0175393
9712	231.209	1	0	1	0	0	0	0.0174504
9714	231.242	1	0	1	0	0	0	0.0175944
9716	231.275	1	0	1	0	0	0	0.0175299
9718	231.309	1	0	1	0	0	0	0.0175236
9720	231.342	1	0	1	0	0	0	0.0176174
9722	231.375	1	0	1	0	0	0	0.0176206
9724	231.409	1	0	1	0	0	0	0.0177531
9726	231.442	1	0	1	0	0	0	0.0176188
9728	231.475	1	0	1	0	0	0	0.0175909
9730	231.509	1	0	1	0	0	0	0.0175445
9732	231.542	1	0	1	0	0	0	0.0176289
9734	231.575	1	0	1	0	0	0	0.0175313
9736	231.609	1	0	1	0	0	0	0.0174898
9738	231.642	1	0	1	0	0	0	0.0174664
9740	231.675	1	0	1	0	0	0	0.0174267
9742	231.709	1	0	1	0	0	0	0.0173249
9744	231.742	1	0	1	0	0	0	0.0173465
9746	231.775	1	0	1	0	0	0	0.0172956
9748	231.809	1	0	1	0	0	0	0.0172558
9750	231.842	1	0	1	0	0	0	0.0173182
9752	231.875	1	0	1	0	0	0	0.0173521
9754	231.909	1	0	1	0	0	0	0.0174706
9756	231.942	1	0	1	0	0	0	0.0175564
9758	231.975	1	0	1	0	0	0	0.0175836
9760	232.009	1	0	1	0	0	0	0.0176171
9762	232.042	1	0	1	0	0	0	0.0176286
9764	232.075	1	0	1	0	0	0	0.0175132
9766	232.109	1	0	1	0	0	0	0.0175581
9768	232.142	1	0	1	0	0	0	0.0176185
9770	232.175	1	0	1	0	0	0	0.0175909
9772	232.209	1	0	1	0	0	0	0.0176394
9774	232.242	1	0	1	0	0	0	0.0176551
9776	232.275	1	0	1	0	0	0	0.0175864
9778	232.309	1	0	1	0	0	0	0.0175086
9780	232.342	1	0	1	0	0	0	0.0175679
9782	232.375	1	0	1	0	0	0	0.0176764
9784	232.409	1	0	1	0	0	0	0.0176268
9786	232.442	1	0	1	0	0	0	0.0175794
9788	232.475	1	0	1	0	0	0	0.0176631
9790	232.509	1	0	1	0	0	0	0.0176251
9792	232.542	1	0	1	0	0	0	0.0174919
9794	232.575	1	0	1	0	0	0	0.017419
9796	232.609	1	0	1	0	0	0	0.0174148
9798	232.642	1	0	1	0	0	0	0.0173573
9800	232.675	1	0	1	0	0	0	0.0174629
9802	232.709	1	0	1	0	0	0	0.0174595
9804	232.742	1	0	1	0	0	0	0.0176952
9806	232.775	1	0	1	0	0	0	0.0177768
9808	232.809	1	0	1	0	0	0	0.0178172
9810	232.842	1	0	1	0	0	0	0.0177447
9812	232.875	1	0	1	0	0	0	0.0177681
9814	232.909	1	0	1	0	0	0	0.0175529
9816	232.942	1	0	1	0	0	0	0.0175491
9818	232.975	1	0	1	0	0	0	0.0176418
9820	233.009	1	0	1	0	0	0	0.017631
9822	233.042	1	0	1	0	0	0	0.0175512
9824	233.075	1	0	1	0	0	0	0.0173793
9826	233.109	1	0	1	0	0	0	0.0174357
9828	233.142	1	0	1	0	0	0	0.0173646
9830	233.175	1	0	1	0	0	0	0.0173416
9832	233.209	1	0	1	0	0	0	0.0174127
9834	233.242	1	0	1	0	0	0	0.017411
9836	233.275	1	0	1	0	0	0	0.017238
9838	233.309	1	0	1	0	0	0	0.0171418
9840	233.342	1	0	1	0	0	0	0.017155
9842	233.375	1	0	1	0	0	0	0.0174305
9844	233.409	1	0	1	0	0	0	0.0173615
9846	233.442	1	0	1	0	0	0	0.0172366
9848	233.475	1	0	1	0	0	0	0.0171648
9850	233.509	1	0	1	0	0	0	0.0171146
9852	233.542	1	0	1	0	0	0	0.0171983
9854	233.575	1	0	1	0	0	0	0.0171453
9856	233.609	1	0	1	0	0	0	0.0170923
9858	233.642	1	0	1	0	0	0	0.0171226
9860	233.675	1	0	1	0	0	0	0.0172237
9862	233.709	1	0	1	0	0	0	0.0171822
9864	233.742	1	0	1	0	0	0	0.0171062
9866	233.775	1	0	1	0	0	0	0.0172973
9868	233.809	1	0	1	0	0	0	0.0172492
9870	233.842	1	0	1	0	0	0	0.0172593
9872	233.875	1	0	1	0	0	0	0.0172942
9874	233.909	1	0	1	0	0	0	0.0173636
9876	233.942	1	0	1	0	0	0	0.0173074
9878	233.975	1	0	1	0	0	0	0.0172945
9880	234.009	1	0	1	0	0	0	0.0174539
9882	234.042	1	0	1	0	0	0	0.0176042
9884	234.075	1	0	1	0	0	0	0.0175752
9886	234.109	1	0	1	0	0	0	0.0175184
9888	234.142	1	0	1	0	0	0	0.0172677
9890	234.175	1	0	1	0	0	0	0.0172073
9892	234.209	1	0	1	0	0	0	0.0173514
9894	234.242	1	0	1	0	0	0	0.0173827
9896	234.275	1	0	1	0	0	0	0.0173737
9898	234.309	1	0	1	0	0	0	0.0174288
9900	234.342	1	0	1	0	0	0	0.017358
9902	234.375	1	0	1	0	0	0	0.0174138
9904	234.409	1	0	1	0	0	0	0.0172659
9906	234.442	1	0	1	0	0	0	0.0172767
9908	234.475	1	0	1	0	0	0	0.0172391
9910	234.509	1	0	1	0	0	0	0.0172952
9912	234.542	1	0	1	0	0	0	0.0172408
9914	234.575	1	0	1	0	0	0	0.0171571
9916	234.609	1	0	1	0	0	0	0.0171529
9918	234.642	1	0	1	0	0	0	0.017101
9920	234.675	1	0	1	0	0	0	0.0172035
9922	234.709	1	0	1	0	0	0	0.0171491
9924	234.742	1	0	1	0	0	0	0.0171728
9926	234.775	1	0	1	0	0	0	0.0171617
9928	234.809	1	0	1	0	0	0	0.0169688
9930	234.842	1	0	1	0	0	0	0.0171686
9932	234.875	1	0	1	0	0	0	0.0171341
9934	234.909	1	0	1	0	0	0	0.0171125
9936	234.942	1	0	1	0	0	0	0.0172098
9938	234.975	1	0	1	0	0	0	0.0171578
9940	235.009	1	0	1	0	0	0	0.0171446
9942	235.042	1	0	1	0	0	0	0.017079
9944	235.075	1	0	1	0	0	0	0.0171226
9946	235.109	1	0	1	0	0	0	0.0168883
9948	235.142	1	0	1	0	0	0	0.0169319
9950	235.175	1	0	1	0	0	0	0.017033
9952	235.209	1	0	1	0	0	0	0.0169754
9954	235.242	1	0	1	0	0	0	0.0168381
9956	235.275	1	0	1	0	0	0	0.0169036
9958	235.309	1	0	1	0	0	0	0.0170121
9960	235.342	1	0	1	0	0	0	0.0169137
9962	235.375	1	0	1	0	0	0	0.0169751
9964	235.409	1	0	1	0	0	0	0.0168238
9966	235.442	1	0	1	0	0	0	0.0167955
9968	235.475	1	0	1	0	0	0	0.0167735
9970	235.509	1	0	1	0	0	0	0.0169894
9972	235.542	1	0	1	0	0	0	0.0171303
9974	235.575	1	0	1	0	0	0	0.0171289
9976	235.609	1	0	1	0	0	0	0.0171805
9978	235.642	1	0	1	0	0	0	0.0172227
9980	235.675	1	0	1	0	0	0	0.0171965
9982	235.709	1	0	1	0	0	0	0.0171979
9984	235.742	1	0	1	0	0	0	0.017071
9986	235.775	1	0	1	0	0	0	0.016898
9988	235.809	1	0	1	0	0	0	0.016951
9990	235.842	1	0	1	0	0	0	0.0169814
9992	235.875	1	0	1	0	0	0	0.0169678
9994	235.909	1	0	1	0	0	0	0.0168928
9996	235.942	1	0	1	0	0	0	0.0169088
9998	235.975	1	0	1	0	0	0	0.0167812
10000	236.009	1	0	1	0	0	0	0.0167226
10002	236.042	1	0	1	0	0	0	0.0168482
10004	236.075	1	0	1	0	0	0	0.0168503
10006	236.109	1	0	1	0	0	0	0.016905
10008	236.142	1	0	1	0	0	0	0.0170414
10010	236.175	1	0	1	0	0	0	0.0170971
10012	236.209	1	0	1	0	0	0	0.0170849
10014	236.242	1	0	1	0	0	0	0.0172314
10016	236.275	1	0	1	0	0	0	0.0173534
10018	236.309	1	0	1	0	0	0	0.0172917
10020	236.342	1	0	1	0	0	0	0.0172534
10022	236.375	1	0	1	0	0	0	0.0171763
10024	236.409	1	0	1	0	0	0	0.0170257
10026	236.442	1	0	1	0	0	0	0.0169322
10028	236.475	1	0	1	0	0	0	0.0169995
10030	236.509	1	0	1	0	0	0	0.0168042
10032	236.542	1	0	1	0	0	0	0.0168035
10034	236.575	1	0	1	0	0	0	0.0168464
10036	236.609	1	0	1	0	0	0	0.0168471
10038	236.642	1	0	1	0	0	0	0.0168272
10040	236.675	1	0	1	0	0	0	0.0169992
10042	236.709	1	0	1	0	0	0	0.0170717
10044	236.742	1	0	1	0	0	0	0.0171686
10046	236.775	1	0	1	0	0	0	0.0172851
10048	236.809	1	0	1	0	0	0	0.0174574
10050	236.842	1	0	1	0	0	0	0.0175609
10052	236.875	1	0	1	0	0	0	0.0175494
10054	236.909	1	0	1	0	0	0	0.0174741
10056	236.942	1	0	1	0	0	0	0.0174075
10058	236.975	1	0	1	0	0	0	0.0173953
10060	237.009	1	0	1	0	0	0	0.0174284
10062	237.042	1	0	1	0	0	0	0.0175362
10064	237.075	1	0	1	0	0	0	0.0174162
10066	237.109	1	0	1	0	0	0	0.0173531
10068	237.142	1	0	1	0	0	0	0.0173559
10070	237.175	1	0	1	0	0	0	0.0173667
10072	237.209	1	0	1	0	0	0	0.0173172
10074	237.242	1	0	1	0	0	0	0.0172764
10076	237.275	1	0	1	0	0	0	0.0173433
10078	237.308	1	0	1	0	0	0	0.0173259
10080	237.342	1	0	1	0	0	0	0.0171146
10082	237.375	1	0	1	0	0	0	0.0171446
10084	237.408	1	0	1	0	0	0	0.0172907
10086	237.442	1	0	1	0	0	0	0.0171756
10088	237.475	1	0	1	0	0	0	0.0170665
10090	237.508	1	0	1	0	0	0	0.0171181
10092	237.542	1	0	1	0	0	0	0.0171829
10094	237.575	1	0	1	0	0	0	0.0170316
10096	237.608	1	0	1	0	0	0	0.017004
10098	237.642	1	0	1	0	0	0	0.0172181
10100	237.675	1	0	1	0	0	0	0.0172178
10102	237.708	1	0	1	0	0	0	0.0171156
10104	237.742	1	0	1	0	0	0	0.017004
10106	237.775	1	0	1	0	0	0	0.017026
10108	237.808	1	0	1	0	0	0	0.0170135
10110	237.842	1	0	1	0	0	0	0.0168691
10112	237.875	1	0	1	0	0	0	0.0169444
10114	237.908	1	0	1	0	0	0	0.0169563
10116	237.942	1	0	1	0	0	0	0.0170013
10118	237.975	1	0	1	0	0	0	0.0169336
10120	238.008	1	0	1	0	0	0	0.0169667
10122	238.042	1	0	1	0	0	0	0.0169427
10124	238.075	1	0	1	0	0	0	0.0169465
10126	238.108	1	0	1	0	0	0	0.0169277
10128	238.142	1	0	1	0	0	0	0.0169399
10130	238.175	1	0	1	0	0	0	0.016874
10132	238.208	1	0	1	0	0	0	0.0167994
10134	238.242	1	0	1	0	0	0	0.0168959
10136	238.275	1	0	1	0	0	0	0.0169374
10138	238.308	1	0	1	0	0	0	0.0169894
10140	238.342	1	0	1	0	0	0	0.0169552
10142	238.375	1	0	1	0	0	0	0.0170752
10144	238.408	1	0	1	0	0	0	0.0170543
10146	238.442	1	0	1	0	0	0	0.0170302
10148	238.475	1	0	1	0	0	0	0.0170243
10150	238.508	1	0	1	0	0	0	0.0170351
10152	238.542	1	0	1	0	0	0	0.0169472
10154	238.575	1	0	1	0	0	0	0.0169266
10156	238.608	1	0	1	0	0	0	0.0170114
10158	238.642	1	0	1	0	0	0	0.017034
10160	238.675	1	0	1	0	0	0	0.0170706
10162	238.708	1	0	1	0	0	0	0.0170822
10164	238.742	1	0	1	0	0	0	0.0172307
10166	238.775	1	0	1	0	0	0	0.0172433
10168	238.808	1	0	1	0	0	0	0.017253
10170	238.842	1	0	1	0	0	0	0.0173834
10172	238.875	1	0	1	0	0	0	0.0174221
10174	238.908	1	0	1	0	0	0	0.0173479
10176	238.942	1	0	1	0	0	0	0.0173723
10178	238.975	1	0	1	0	0	0	0.0173615
10180	239.008	1	0	1	0	0	0	0.0171648
10182	239.042	1	0	1	0	0	0	0.0171268
10184	239.075	1	0	1	0	0	0	0.017479
10186	239.108	1	0	1	0	0	0	0.0173555
10188	239.142	1	0	1	0	0	0	0.0172841
10190	239.175	1	0	1	0	0	0	0.0174887
10192	239.208	1	0	1	0	0	0	0.0172816
10194	239.242	1	0	1	0	0	0	0.0171421
10196	239.275	1	0	1	0	0	0	0.0172004
10198	239.308	1	0	1	0	0	0	0.0172345
10200	239.342	1	0	1	0	0	0	0.0170769
10202	239.375	1	0	1	0	0	0	0.0170082
10204	239.408	1	0	1	0	0	0	0.0170347
10206	239.442	1	0	1	0	0	0	0.0168973
10208	239.475	1	0	1	0	0	0	0.016806
10210	239.508	1	0	1	0	0	0	0.0170285
10212	239.542	1	0	1	0	0	0	0.0170741
10214	239.575	1	0	1	0	0	0	0.0170954
10216	239.608	1	0	1	0	0	0	0.0171118
10218	239.642	1	0	1	0	0	0	0.0171585
10220	239.675	1	0	1	0	0	0	0.0172415
10222	239.708	1	0	1	0	0	0	0.0172806
10224	239.742	1	0	1	0	0	0	0.0173733
10226	239.775	1	0	1	0	0	0	0.0173956
10228	239.808	1	0	1	0	0	0	0.0172621
10230	239.842	1	0	1	0	0	0	0.0172879
10232	239.875	1	0	1	0	0	0	0.0173249
10234	239.908	1	0	1	0	0	0	0.017298
10236	239.942	1	0	1	0	0	0	0.0171505
10238	239.975	1	0	1	0	0	0	0.0170476
10240	240.008	1	0	1	0	0	0	0.017245
10242	240.042	1	0	1	0	0	0	0.0171421
10244	240.075	1	0	1	0	0	0	0.0170365
10246	240.108	1	0	1	0	0	0	0.0171505
10248	240.142	1	0	1	0	0	0	0.0172192
10250	240.175	1	0	1	0	0	0	0.017072
10252	240.208	1	0	1	0	0	0	0.0170152
10254	240.242	1	0	1	0	0	0	0.0172007
10256	240.275	1	0	1	0	0	0	0.0171801
10258	240.308	1	0	1	0	0	0	0.0170637
10260	240.342	1	0	1	0	0	0	0.0171547
10262	240.375	1	0	1	0	0	0	0.0172321
10264	240.408	1	0	1	0	0	0	0.0172094
10266	240.442	1	0	1	0	0	0	0.0170944
10268	240.475	1	0	1	0	0	0	0.0170605
10270	240.508	1	0	1	0	0	0	0.0168447
10272	240.542	1	0	1	0	0	0	0.0169695
10274	240.575	1	0	1	0	0	0	0.0171484
10276	240.608	1	0	1	0	0	0	0.0170867
10278	240.642	1	0	1	0	0	0	0.0171418
10280	240.675	1	0	1	0	0	0	0.0171376
10282	240.708	1	0	1	0	0	0	0.0169612
10284	240.742	1	0	1	0	0	0	0.0168436
10286	240.775	1	0	1	0	0	0	0.0169845
10288	240.808	1	0	1	0	0	0	0.0169071
10290	240.842	1	0	1	0	0	0	0.0168517
10292	240.875	1	0	1	0	0	0	0.016904
10294	240.908	1	0	1	0	0	0	0.0171686
10296	240.942	1	0	1	0	0	0	0.0172192
10298	240.975	1	0	1	0	0	0	0.0171739
10300	241.008	1	0	1	0	0	0	0.0172415
10302	241.042	1	0	1	0	0	0	0.0171672
10304	241.075	1	0	1	0	0	0	0.0170839
10306	241.108	1	0	1	0	0	0	0.0172039
10308	241.142	1	0	1	0	0	0	0.0170748
10310	241.175	1	0	1	0	0	0	0.0169775
10312	241.208	1	0	1	0	0	0	0.0171219
10314	241.242	1	0	1	0	0	0	0.0169748
10316	241.275	1	0	1	0	0	0	0.0168729
10318	241.308	1	0	1	0	0	0	0.0169552
10320	241.342	1	0	1	0	0	0	0.0169911
10322	241.375	1	0	1	0	0	0	0.0169367
10324	241.408	1	0	1	0	0	0	0.0170888
10326	241.442	1	0	1	0	0	0	0.017252
10328	241.475	1	0	1	0	0	0	0.0172429
10330	241.508	1	0	1	0	0	0	0.0172251
10332	241.542	1	0	1	0	0	0	0.0172018
10334	241.575	1	0	1	0	0	0	0.0171216
10336	241.608	1	0	1	0	0	0	0.0170431
10338	241.642	1	0	1	0	0	0	0.0171704
10340	241.675	1	0	1	0	0	0	0.0172091
10342	241.708	1	0	1	0	0	0	0.0170958
10344	241.742	1	0	1	0	0	0	0.0171739
10346	241.775	1	0	1	0	0	0	0.0170455
10348	241.808	1	0	1	0	0	0	0.0168604
10350	241.842	1	0	1	0	0	0	0.0169444
10352	241.875	1	0	1	0	0	0	0.0170483
10354	241.908	1	0	1	0	0	0	0.0168558
10356	241.942	1	0	1	0	0	0	0.0170431
10358	241.975	1	0	1	0	0	0	0.0172642
10360	242.008	1	0	1	0	0	0	0.0173242
10362	242.042	1	0	1	0	0	0	0.0173106
10364	242.075	1	0	1	0	0	0	0.017419
10366	242.108	1	0	1	0	0	0	0.0172746
10368	242.142	1	0	1	0	0	0	0.0171261
10370	242.175	1	0	1	0	0	0	0.0170919
10372	242.208	1	0	1	0	0	0	0.0171491
10374	242.242	1	0	1	0	0	0	0.0170337
10376	242.275	1	0	1	0	0	0	0.016919
10378	242.308	1	0	1	0	0	0	0.0168949
10380	242.342	1	0	1	0	0	0	0.0167415
10382	242.375	1	0	1	0	0	0	0.016942
10384	242.408	1	0	1	0	0	0	0.0169587
10386	242.442	1	0	1	0	0	0	0.016921
10388	242.475	1	0	1	0	0	0	0.0168945
10390	242.508	1	0	1	0	0	0	0.0170424
10392	242.542	1	0	1	0	0	0	0.017087
10394	242.575	1	0	1	0	0	0	0.0172126
10396	242.608	1	0	1	0	0	0	0.0173475
10398	242.642	1	0	1	0	0	0	0.017351
10400	242.675	1	0	1	0	0	0	0.01732
10402	242.708	1	0	1	0	0	0	0.0172227
10404	242.742	1	0	1	0	0	0	0.0172802
10406	242.775	1	0	1	0	0	0	0.0170379
10408	242.808	1	0	1	0	0	0	0.0171896
10410	242.842	1	0	1	0	0	0	0.0169629
10412	242.875	1	0	1	0	0	0	0.0168349
10414	242.908	1	0	1	0	0	0	0.0169751
10416	242.942	1	0	1	0	0	0	0.0168799
10418	242.975	1	0	1	0	0	0	0.0168401
10420	243.008	1	0	1	0	0	0	0.0169852
10422	243.042	1	0	1	0	0	0	0.0171292
10424	243.075	1	0	1	0	0	0	0.0170658
10426	243.108	1	0	1	0	0	0	0.0171191
10428	243.142	1	0	1	0	0	0	0.0171693
10430	243.175	1	0	1	0	0	0	0.0171718
10432	243.208	1	0	1	0	0	0	0.0171439
10434	243.242	1	0	1	0	0	0	0.0171589
10436	243.275	1	0	1	0	0	0	0.0172063
10438	243.308	1	0	1	0	0	0	0.0172297
10440	243.342	1	0	1	0	0	0	0.0173758
10442	243.375	1	0	1	0	0	0	0.0174692
10444	243.408	1	0	1	0	0	0	0.0175553
10446	243.442	1	0	1	0	0	0	0.0176401
10448	243.475	1	0	1	0	0	0	0.0176104
10450	243.508	1	0	1	0	0	0	0.0175449
10452	243.542	1	0	1	0	0	0	0.0174842
10454	243.575	1	0	1	0	0	0	0.0173674
10456	243.608	1	0	1	0	0	0	0.0173165
10458	243.642	1	0	1	0	0	0	0.0173071
10460	243.675	1	0	1	0	0	0	0.0174748
10462	243.708	1	0	1	0	0	0	0.0173604
10464	243.742	1	0	1	0	0	0	0.0172652
10466	243.775	1	0	1	0	0	0	0.0172792
10468	243.808	1	0	1	0	0	0	0.0173036
10470	243.842	1	0	1	0	0	0	0.0172356
10472	243.875	1	0	1	0	0	0	0.0172882
10474	243.908	1	0	1	0	0	0	0.0173451
10476	243.942	1	0	1	0	0	0	0.0173768
10478	243.975	1	0	1	0	0	0	0.0173126
10480	244.008	1	0	1	0	0	0	0.0172342
10482	244.042	1	0	1	0	0	0	0.0172279
10484	244.075	1	0	1	0	0	0	0.0173269
10486	244.108	1	0	1	0	0	0	0.017343
10488	244.142	1	0	1	0	0	0	0.0172415
10490	244.175	1	0	1	0	0	0	0.0172391
10492	244.208	1	0	1	0	0	0	0.0172687
10494	244.242	1	0	1	0	0	0	0.0172973
10496	244.275	1	0	1	0	0	0	0.0172746
10498	244.308	1	0	1	0	0	0	0.017305
10500	244.342	1	0	1	0	0	0	0.0173336
10502	244.375	1	0	1	0	0	0	0.017314
10504	244.408	1	0	1	0	0	0	0.0173357
10506	244.442	1	0	1	0	0	0	0.0173409
10508	244.475	1	0	1	0	0	0	0.0173444
10510	244.508	1	0	1	0	0	0	0.0173534
10512	244.542	1	0	1	0	0	0	0.0173322
10514	244.575	1	0	1	0	0	0	0.0173465
10516	244.608	1	0	1	0	0	0	0.0173569
10518	244.642	1	0	1	0	0	0	0.0174385
10520	244.675	1	0	1	0	0	0	0.0175578
10522	244.708	1	0	1	0	0	0	0.0176104
10524	244.742	1	0	1	0	0	0	0.0175662
10526	244.775	1	0	1	0	0	0	0.0175975
10528	244.808	1	0	1	0	0	0	0.0174668
10530	244.842	1	0	1	0	0	0	0.0174748
10532	244.875	1	0	1	0	0	0	0.0174629
10534	244.908	1	0	1	0	0	0	0.0173447
10536	244.942	1	0	1	0	0	0	0.0172457
10538	244.975	1	0	1	0	0	0	0.0172663
10540	245.008	1	0	1	0	0	0	0.0172227
10542	245.042	1	0	1	0	0	0	0.0171488
10544	245.075	1	0	1	0	0	0	0.0171366
10546	245.108	1	0	1	0	0	0	0.0172056
10548	245.142	1	0	1	0	0	0	0.0172558
10550	245.175	1	0	1	0	0	0	0.0171519
10552	245.208	1	0	1	0	0	0	0.017086
10554	245.242	1	0	1	0	0	0	0.0171515
10556	245.275	1	0	1	0	0	0	0.0171519
10558	245.308	1	0	1	0	0	0	0.0172133
10560	245.342	1	0	1	0	0	0	0.0172384
10562	245.375	1	0	1	0	0	0	0.0172101
10564	245.408	1	0	1	0	0	0	0.0171697
10566	245.442	1	0	1	0	0	0	0.01714
10568	245.475	1	0	1	0	0	0	0.0172014
10570	245.508	1	0	1	0	0	0	0.0172352
10572	245.542	1	0	1	0	0	0	0.0171725
10574	245.575	1	0	1	0	0	0	0.0171282
10576	245.608	1	0	1	0	0	0	0.0170891
10578	245.642	1	0	1	0	0	0	0.0171299
10580	245.675	1	0	1	0	0	0	0.0170748
10582	245.708	1	0	1	0	0	0	0.0170218
10584	245.742	1	0	1	0	0	0	0.017109
10586	245.775	1	0	1	0	0	0	0.0170016
10588	245.808	1	0	1	0	0	0	0.0169444
10590	245.841	1	0	1	0	0	0	0.0170026
10592	245.875	1	0	1	0	0	0	0.0170438
10594	245.908	1	0	1	0	0	0	0.0170162
10596	245.941	1	0	1	0	0	0	0.0170473
10598	245.975	1	0	1	0	0	0	0.0170173
10600	246.008	1	0	1	0	0	0	0.0170672
10602	246.041	1	0	1	0	0	0	0.0170103
10604	246.075	1	0	1	0	0	0	0.016995
10606	246.108	1	0	1	0	0	0	0.0169068
10608	246.141	1	0	1	0	0	0	0.0170131
10610	246.175	1	0	1	0	0	0	0.0170239
10612	246.208	1	0	1	0	0	0	0.017003
10614	246.241	1	0	1	0	0	0	0.0170225
10616	246.275	1	0	1	0	0	0	0.0170644
10618	246.308	1	0	1	0	0	0	0.0170424
10620	246.341	1	0	1	0	0	0	0.0170169
10622	246.375	1	0	1	0	0	0	0.017063
10624	246.408	1	0	1	0	0	0	0.0170093
10626	246.441	1	0	1	0	0	0	0.01698
10628	246.475	1	0	1	0	0	0	0.0169632
10630	246.508	1	0	1	0	0	0	0.0170285
10632	246.541	1	0	1	0	0	0	0.0170016
10634	246.575	1	0	1	0	0	0	0.0170337
10636	246.608	1	0	1	0	0	0	0.0169992
10638	246.641	1	0	1	0	0	0	0.0170344
10640	246.675	1	0	1	0	0	0	0.0169702
10642	246.708	1	0	1	0	0	0	0.0169992
10644	246.741	1	0	1	0	0	0	0.0173081
10646	246.775	1	0	1	0	0	0	0.0173378
10648	246.808	1	0	1	0	0	0	0.0172872
10650	246.841	1	0	1	0	0	0	0.0172394
10652	246.875	1	0	1	0	0	0	0.0173242
10654	246.908	1	0	1	0	0	0	0.0173667
10656	246.941	1	0	1	0	0	0	0.0174493
10658	246.975	1	0	1	0	0	0	0.0172534
10660	247.008	1	0	1	0	0	0	0.0171847
10662	247.041	1	0	1	0	0	0	0.0173332
10664	247.075	1	0	1	0	0	0	0.0172018
10666	247.108	1	0	1	0	0	0	0.0171495
10668	247.141	1	0	1	0	0	0	0.0170759
10670	247.175	1	0	1	0	0	0	0.0171327
10672	247.208	1	0	1	0	0	0	0.0169831
10674	247.241	1	0	1	0	0	0	0.0169367
10676	247.275	1	0	1	0	0	0	0.0169312
10678	247.308	1	0	1	0	0	0	0.0169493
10680	247.341	1	0	1	0	0	0	0.0169758
10682	247.375	1	0	1	0	0	0	0.0172304
10684	247.408	1	0	1	0	0	0	0.0173412
10686	247.441	1	0	1	0	0	0	0.0173001
10688	247.475	1	0	1	0	0	0	0.0173883
10690	247.508	1	0	1	0	0	0	0.0174019
10692	247.541	1	0	1	0	0	0	0.0173799
10694	247.575	1	0	1	0	0	0	0.017328
10696	247.608	1	0	1	0	0	0	0.0173935
10698	247.641	1	0	1	0	0	0	0.0174054
10700	247.675	1	0	1	0	0	0	0.0174382
10702	247.708	1	0	1	0	0	0	0.0173046
10704	247.741	1	0	1	0	0	0	0.0171794
10706	247.775	1	0	1	0	0	0	0.0171906
10708	247.808	1	0	1	0	0	0	0.0171599
10710	247.841	1	0	1	0	0	0	0.0171993
10712	247.875	1	0	1	0	0	0	0.0172739
10714	247.908	1	0	1	0	0	0	0.0172059
10716	247.941	1	0	1	0	0	0	0.0171903
10718	247.975	1	0	1	0	0	0	0.0171418
10720	248.008	1	0	1	0	0	0	0.0171801
10722	248.041	1	0	1	0	0	0	0.0171909
10724	248.075	1	0	1	0	0	0	0.0171498
10726	248.108	1	0	1	0	0	0	0.017161
10728	248.141	1	0	1	0	0	0	0.0171446
10730	248.175	1	0	1	0	0	0	0.0172178
10732	248.208	1	0	1	0	0	0	0.0171125
10734	248.241	1	0	1	0	0	0	0.0169479
10736	248.275	1	0	1	0	0	0	0.0169577
10738	248.308	1	0	1	0	0	0	0.0169524
10740	248.341	1	0	1	0	0	0	0.017154
10742	248.375	1	0	1	0	0	0	0.0172865
10744	248.408	1	0	1	0	0	0	0.01745
10746	248.441	1	0	1	0	0	0	0.0173901
10748	248.475	1	0	1	0	0	0	0.0173991
10750	248.508	1	0	1	0	0	0	0.0175086
10752	248.541	1	0	1	0	0	0	0.0174194
10754	248.575	1	0	1	0	0	0	0.0174615
10756	248.608	1	0	1	0	0	0	0.0173908
10758	248.641	1	0	1	0	0	0	0.0173953
10760	248.675	1	0	1	0	0	0	0.0173402
10762	248.708	1	0	1	0	0	0	0.0174232
10764	248.741	1	0	1	0	0	0	0.0173559
10766	248.775	1	0	1	0	0	0	0.017374
10768	248.808	1	0	1	0	0	0	0.0173566
10770	248.841	1	0	1	0	0	0	0.017275
10772	248.875	1	0	1	0	0	0	0.0173245
10774	248.908	1	0	1	0	0	0	0.0172279
10776	248.941	1	0	1	0	0	0	0.0172122
10778	248.975	1	0	1	0	0	0	0.0172122
10780	249.008	1	0	1	0	0	0	0.0172045
10782	249.041	1	0	1	0	0	0	0.0172213
10784	249.075	1	0	1	0	0	0	0.0172209
10786	249.108	1	0	1	0	0	0	0.0171927
10788	249.141	1	0	1	0	0	0	0.017214
10790	249.175	1	0	1	0	0	0	0.0172743
10792	249.208	1	0	1	0	0	0	0.0172021
10794	249.241	1	0	1	0	0	0	0.0172879
10796	249.275	1	0	1	0	0	0	0.0172349
10798	249.308	1	0	1	0	0	0	0.0172774
10800	249.341	1	0	1	0	0	0	0.0171599
10802	249.375	1	0	1	0	0	0	0.0172882
10804	249.408	1	0	1	0	0	0	0.0172091
10806	249.441	1	0	1	0	0	0	0.0173081
10808	249.475	1	0	1	0	0	0	0.0172506
10810	249.508	1	0	1	0	0	0	0.01735
10812	249.541	1	0	1	0	0	0	0.0173252
10814	249.575	1	0	1	0	0	0	0.0173831
10816	249.608	1	0	1	0	0	0	0.0174065
10818	249.641	1	0	1	0	0	0	0.017389
10820	249.675	1	0	1	0	0	0	0.0174762
10822	249.708	1	0	1	0	0	0	0.0173834
10824	249.741	1	0	1	0	0	0	0.0173935
10826	249.775	1	0	1	0	0	0	0.0173667
10828	249.808	1	0	1	0	0	0	0.0173653
10830	249.841	1	0	1	0	0	0	0.0174619
10832	249.875	1	0	1	0	0	0	0.0175494
10834	249.908	1	0	1	0	0	0	0.0175609
10836	249.941	1	0	1	0	0	0	0.0174731
10838	249.975	1	0	1	0	0	0	0.0174779
10840	250.008	1	0	1	0	0	0	0.0173461
10842	250.041	1	0	1	0	0	0	0.0173433
10844	250.075	1	0	1	0	0	0	0.017297
10846	250.108	1	0	1	0	0	0	0.0172178
10848	250.141	1	0	1	0	0	0	0.0172091
10850	250.175	1	0	1	0	0	0	0.017268
10852	250.208	1	0	1	0	0	0	0.0171453
10854	250.241	1	0	1	0	0	0	0.0171522
10856	250.275	1	0	1	0	0	0	0.0172244
10858	250.308	1	0	1	0	0	0	0.0172589
10860	250.341	1	0	1	0	0	0	0.0171582
10862	250.375	1	0	1	0	0	0	0.017093
10864	250.408	1	0	1	0	0	0	0.0171481
10866	250.441	1	0	1	0	0	0	0.0170529
10868	250.475	1	0	1	0	0	0	0.0169455
10870	250.508	1	0	1	0	0	0	0.0169789
10872	250.541	1	0	1	0	0	0	0.0170888
10874	250.575	1	0	1	0	0	0	0.0171882
10876	250.608	1	0	1	0	0	0	0.0170898
10878	250.641	1	0	1	0	0	0	0.0170727
10880	250.675	1	0	1	0	0	0	0.0171641
10882	250.708	1	0	1	0	0	0	0.0169793
10884	250.741	1	0	1	0	0	0	0.0169238
10886	250.775	1	0	1	0	0	0	0.0170379
10888	250.808	1	0	1	0	0	0	0.0171613
10890	250.841	1	0	1	0	0	0	0.017193
10892	250.875	1	0	1	0	0	0	0.0170762
10894	250.908	1	0	1	0	0	0	0.0171223
10896	250.941	1	0	1	0	0	0	0.0170605
10898	250.975	1	0	1	0	0	0	0.0169904
10900	251.008	1	0	1	0	0	0	0.0169462
10902	251.041	1	0	1	0	0	0	0.017011
10904	251.075	1	0	1	0	0	0	0.017131
10906	251.108	1	0	1	0	0	0	0.0170895
10908	251.141	1	0	1	0	0	0	0.0170563
10910	251.175	1	0	1	0	0	0	0.0170752
10912	251.208	1	0	1	0	0	0	0.0170194
10914	251.241	1	0	1	0	0	0	0.0171097
10916	251.275	1	0	1	0	0	0	0.0171027
10918	251.308	1	0	1	0	0	0	0.0171013
10920	251.341	1	0	1	0	0	0	0.0170602
10922	251.375	1	0	1	0	0	0	0.017117
10924	251.408	1	0	1	0	0	0	0.0171836
10926	251.441	1	0	1	0	0	0	0.0171236
10928	251.475	1	0	1	0	0	0	0.0171648
10930	251.508	1	0	1	0	0	0	0.0170867
10932	251.541	1	0	1	0	0	0	0.0171313
10934	251.575	1	0	1	0	0	0	0.01714
10936	251.608	1	0	1	0	0	0	0.0171296
10938	251.641	1	0	1	0	0	0	0.0171184
10940	251.675	1	0	1	0	0	0	0.0171041
10942	251.708	1	0	1	0	0	0	0.0170971
10944	251.741	1	0	1	0	0	0	0.0171261
10946	251.775	1	0	1	0	0	0	0.0171421
10948	251.808	1	0	1	0	0	0	0.0171505
10950	251.841	1	0	1	0	0	0	0.0173615
10952	251.875	1	0	1	0	0	0	0.0172757
10954	251.908	1	0	1	0	0	0	0.0174894
10956	251.941	1	0	1	0	0	0	0.0174106
10958	251.975	1	0	1	0	0	0	0.0173276
10960	252.008	1	0	1	0	0	0	0.0173294
10962	252.041	1	0	1	0	0	0	0.0173332
10964	252.075	1	0	1	0	0	0	0.0172269
10966	252.108	1	0	1	0	0	0	0.017252
10968	252.141	1	0	1	0	0	0	0.0172262
10970	252.175	1	0	1	0	0	0	0.0171292
10972	252.208	1	0	1	0	0	0	0.0172569
10974	252.241	1	0	1	0	0	0	0.0170734
10976	252.275	1	0	1	0	0	0	0.0170703
10978	252.308	1	0	1	0	0	0	0.0170291
10980	252.341	1	0	1	0	0	0	0.0171882
10982	252.375	1	0	1	0	0	0	0.0171746
10984	252.408	1	0	1	0	0	0	0.017123
10986	252.441	1	0	1	0	0	0	0.0169758
10988	252.475	1	0	1	0	0	0	0.0170201
10990	252.508	1	0	1	0	0	0	0.0170543
10992	252.541	1	0	1	0	0	0	0.0169594
10994	252.575	1	0	1	0	0	0	0.0168991
10996	252.608	1	0	1	0	0	0	0.0169845
10998	252.641	1	0	1	0	0	0	0.017025
11000	252.675	1	0	1	0	0	0	0.017071
11002	252.708	1	0	1	0	0	0	0.0170264
11004	252.741	1	0	1	0	0	0	0.0170511
11006	252.775	1	0	1	0	0	0	0.0170323
11008	252.808	1	0	1	0	0	0	0.0170616
11010	252.841	1	0	1	0	0	0	0.0170602
11012	252.875	1	0	1	0	0	0	0.0170162
11014	252.908	1	0	1	0	0	0	0.0170473
11016	252.941	1	0	1	0	0	0	0.0170264
11018	252.975	1	0	1	0	0	0	0.0170145
11020	253.008	1	0	1	0	0	0	0.0170407
11022	253.041	1	0	1	0	0	0	0.0170305
11024	253.075	1	0	1	0	0	0	0.0170417
11026	253.108	1	0	1	0	0	0	0.017116
11028	253.141	1	0	1	0	0	0	0.0171198
11030	253.175	1	0	1	0	0	0	0.0170539
11032	253.208	1	0	1	0	0	0	0.0170658
11034	253.241	1	0	1	0	0	0	0.017147
11036	253.275	1	0	1	0	0	0	0.017184
11038	253.308	1	0	1	0	0	0	0.0171596
11040	253.341	1	0	1	0	0	0	0.0170176
11042	253.375	1	0	1	0	0	0	0.0170142
11044	253.408	1	0	1	0	0	0	0.0170616
11046	253.441	1	0	1	0	0	0	0.0170469
11048	253.475	1	0	1	0	0	0	0.0169863
11050	253.508	1	0	1	0	0	0	0.0169709
11052	253.541	1	0	1	0	0	0	0.0170236
11054	253.574	1	0	1	0	0	0	0.0170466
11056	253.608	1	0	1	0	0	0	0.0169287
11058	253.641	1	0	1	0	0	0	0.0169674
11060	253.674	1	0	1	0	0	0	0.0170368
11062	253.708	1	0	1	0	0	0	0.0170347
11064	253.741	1	0	1	0	0	0	0.0170393
11066	253.774	1	0	1	0	0	0	0.0170086
11068	253.808	1	0	1	0	0	0	0.0170155
11070	253.841	1	0	1	0	0	0	0.0170089
11072	253.874	1	0	1	0	0	0	0.0169224
11074	253.908	1	0	1	0	0	0	0.0170637
11076	253.941	1	0	1	0	0	0	0.0172042
11078	253.974	1	0	1	0	0	0	0.0173074
11080	254.008	1	0	1	0	0	0	0.0173304
11082	254.041	1	0	1	0	0	0	0.0171041
11084	254.074	1	0	1	0	0	0	0.017214
11086	254.108	1	0	1	0	0	0	0.01717
11088	254.141	1	0	1	0	0	0	0.0170114
11090	254.174	1	0	1	0	0	0	0.0171505
11092	254.208	1	0	1	0	0	0	0.0170762
11094	254.241	1	0	1	0	0	0	0.0169566
11096	254.274	1	0	1	0	0	0	0.0170047
11098	254.308	1	0	1	0	0	0	0.0170794
11100	254.341	1	0	1	0	0	0	0.0170114
11102	254.374	1	0	1	0	0	0	0.0169929
11104	254.408	1	0	1	0	0	0	0.0171139
11106	254.441	1	0	1	0	0	0	0.0170916
11108	254.474	1	0	1	0	0	0	0.0170724
11110	254.508	1	0	1	0	0	0	0.0171899
11112	254.541	1	0	1	0	0	0	0.0171728
11114	254.574	1	0	1	0	0	0	0.017025
11116	254.608	1	0	1	0	0	0	0.0170375
11118	254.641	1	0	1	0	0	0	0.0171519
11120	254.674	1	0	1	0	0	0	0.0172774
11122	254.708	1	0	1	0	0	0	0.0172743
11124	254.741	1	0	1	0	0	0	0.0172087
11126	254.774	1	0	1	0	0	0	0.0173332
11128	254.808	1	0	1	0	0	0	0.0172997
11130	254.841	1	0	1	0	0	0	0.0173562
11132	254.874	1	0	1	0	0	0	0.017321
11134	254.908	1	0	1	0	0	0	0.0173081
11136	254.941	1	0	1	0	0	0	0.017223
11138	254.974	1	0	1	0	0	0	0.0172377
11140	255.008	1	0	1	0	0	0	0.0172335
11142	255.041	1	0	1	0	0	0	0.0172935
11144	255.074	1	0	1	0	0	0	0.0173001
11146	255.108	1	0	1	0	0	0	0.0172429
11148	255.141	1	0	1	0	0	0	0.017373
11150	255.174	1	0	1	0	0	0	0.0173876
11152	255.208	1	0	1	0	0	0	0.0171822
11154	255.241	1	0	1	0	0	0	0.0169946
11156	255.274	1	0	1	0	0	0	0.0169472
11158	255.308	1	0	1	0	0	0	0.016897
11160	255.341	1	0	1	0	0	0	0.0168642
11162	255.374	1	0	1	0	0	0	0.0168726
11164	255.408	1	0	1	0	0	0	0.0169828
11166	255.441	1	0	1	0	0	0	0.0169545
11168	255.474	1	0	1	0	0	0	0.0169918
11170	255.508	1	0	1	0	0	0	0.0170302
11172	255.541	1	0	1	0	0	0	0.0170574
11174	255.574	1	0	1	0	0	0	0.0170396
11176	255.608	1	0	1	0	0	0	0.0170448
11178	255.641	1	0	1	0	0	0	0.0170909
11180	255.674	1	0	1	0	0	0	0.0170794
11182	255.708	1	0	1	0	0	0	0.0170926
11184	255.741	1	0	1	0	0	0	0.017019
11186	255.774	1	0	1	0	0	0	0.0170427
11188	255.808	1	0	1	0	0	0	0.0170508
11190	255.841	1	0	1	0	0	0	0.0170326
11192	255.874	1	0	1	0	0	0	0.0171017
11194	255.908	1	0	1	0	0	0	0.0170365
11196	255.941	1	0	1	0	0	0	0.0171146
11198	255.974	1	0	1	0	0	0	0.017124
11200	256.008	1	0	1	0	0	0	0.017176
11202	256.041	1	0	1	0	0	0	0.0171449
11204	256.074	1	0	1	0	0	0	0.0171073
11206	256.108	1	0	1	0	0	0	0.017064
11208	256.141	1	0	1	0	0	0	0.0171345
11210	256.174	1	0	1	0	0	0	0.0171226
11212	256.208	1	0	1	0	0	0	0.0171348
11214	256.241	1	0	1	0	0	0	0.0171386
11216	256.274	1	0	1	0	0	0	0.0171156
11218	256.308	1	0	1	0	0	0	0.0171386
11220	256.341	1	0	1	0	0	0	0.0171243
11222	256.374	1	0	1	0	0	0	0.0171289
11224	256.408	1	0	1	0	0	0	0.0171125
11226	256.441	1	0	1	0	0	0	0.017177
11228	256.474	1	0	1	0	0	0	0.0171198
11230	256.508	1	0	1	0	0	0	0.0170755
11232	256.541	1	0	1	0	0	0	0.0171114
11234	256.574	1	0	1	0	0	0	0.0171069
11236	256.608	1	0	1	0	0	0	0.0171414
11238	256.641	1	0	1	0	0	0	0.0170912
11240	256.674	1	0	1	0	0	0	0.017101
11242	256.708	1	0	1	0	0	0	0.017108
11244	256.741	1	0	1	0	0	0	0.0170842
11246	256.774	1	0	1	0	0	0	0.0171547
11248	256.808	1	0	1	0	0	0	0.0171603
11250	256.841	1	0	1	0	0	0	0.017199
11252	256.874	1	0	1	0	0	0	0.0172108
11254	256.908	1	0	1	0	0	0	0.0171366
11256	256.941	1	0	1	0	0	0	0.0171474
11258	256.974	1	0	1	0	0	0	0.0171257
11260	257.008	1	0	1	0	0	0	0.0171502
11262	257.041	1	0	1	0	0	0	0.0171226
11264	257.074	1	0	1	0	0	0	0.0171753
11266	257.108	1	0	1	0	0	0	0.0171997
11268	257.141	1	0	1	0	0	0	0.0171223
11270	257.174	1	0	1	0	0	0	0.0170881
11272	257.208	1	0	1	0	0	0	0.0171393
11274	257.241	1	0	1	0	0	0	0.0171658
11276	257.274	1	0	1	0	0	0	0.0171393
11278	257.308	1	0	1	0	0	0	0.0171589
11280	257.341	1	0	1	0	0	0	0.0171195
11282	257.374	1	0	1	0	0	0	0.0171205
11284	257.408	1	0	1	0	0	0	0.0170755
11286	257.441	1	0	1	0	0	0	0.0171031
11288	257.474	1	0	1	0	0	0	0.0170905
11290	257.508	1	0	1	0	0	0	0.0171094
11292	257.541	1	0	1	0	0	0	0.0170787
11294	257.574	1	0	1	0	0	0	0.0172677
11296	257.608	1	0	1	0	0	0	0.0172757
11298	257.641	1	0	1	0	0	0	0.0173702
11300	257.674	1	0	1	0	0	0	0.0173691
11302	257.708	1	0	1	0	0	0	0.0173391
11304	257.741	1	0	1	0	0	0	0.0172858
11306	257.774	1	0	1	0	0	0	0.0172509
11308	257.808	1	0	1	0	0	0	0.0171317
11310	257.841	1	0	1	0	0	0	0.0171425
11312	257.874	1	0	1	0	0	0	0.0171665
11314	257.908	1	0	1	0	0	0	0.0172129
11316	257.941	1	0	1	0	0	0	0.0171833
11318	257.974	1	0	1	0	0	0	0.0170982
11320	258.008	1	0	1	0	0	0	0.0170912
11322	258.041	1	0	1	0	0	0	0.0171979
11324	258.074	1	0	1	0	0	0	0.017078
11326	258.108	1	0	1	0	0	0	0.0170407
11328	258.141	1	0	1	0	0	0	0.0170766
11330	258.174	1	0	1	0	0	0	0.0170975
11332	258.208	1	0	1	0	0	0	0.0170591
11334	258.241	1	0	1	0	0	0	0.0170065
11336	258.274	1	0	1	0	0	0	0.0170407
11338	258.308	1	0	1	0	0	0	0.0170487
11340	258.341	1	0	1	0	0	0	0.0170626
11342	258.374	1	0	1	0	0	0	0.0172108
11344	258.408	1	0	1	0	0	0	0.0170623
11346	258.441	1	0	1	0	0	0	0.016889
11348	258.474	1	0	1	0	0	0	0.0169217
11350	258.508	1	0	1	0	0	0	0.0168886
11352	258.541	1	0	1	0	0	0	0.0168353
11354	258.574	1	0	1	0	0	0	0.0167844
11356	258.608	1	0	1	0	0	0	0.0169085
11358	258.641	1	0	1	0	0	0	0.0168398
11360	258.674	1	0	1	0	0	0	0.0169402
11362	258.708	1	0	1	0	0	0	0.0169636
11364	258.741	1	0	1	0	0	0	0.017041
11366	258.774	1	0	1	0	0	0	0.0170396
11368	258.808	1	0	1	0	0	0	0.0170215
11370	258.841	1	0	1	0	0	0	0.017018
11372	258.874	1	0	1	0	0	0	0.0170257
11374	258.908	1	0	1	0	0	0	0.016942
11376	258.941	1	0	1	0	0	0	0.0168886
11378	258.974	1	0	1	0	0	0	0.0169273
11380	259.008	1	0	1	0	0	0	0.0170577
11382	259.041	1	0	1	0	0	0	0.0170818
11384	259.074	1	0	1	0	0	0	0.0170421
11386	259.108	1	0	1	0	0	0	0.01714
11388	259.141	1	0	1	0	0	0	0.0172272
11390	259.174	1	0	1	0	0	0	0.0171303
11392	259.208	1	0	1	0	0	0	0.017154
11394	259.241	1	0	1	0	0	0	0.0169887
11396	259.274	1	0	1	0	0	0	0.0169197
11398	259.308	1	0	1	0	0	0	0.0169674
11400	259.341	1	0	1	0	0	0	0.0169863
11402	259.374	1	0	1	0	0	0	0.0168147
11404	259.408	1	0	1	0	0	0	0.016866
11406	259.441	1	0	1	0	0	0	0.0170351
11408	259.474	1	0	1	0	0	0	0.017117
11410	259.508	1	0	1	0	0	0	0.0171875
11412	259.541	1	0	1	0	0	0	0.0172572
11414	259.574	1	0	1	0	0	0	0.0173587
11416	259.608	1	0	1	0	0	0	0.0172928
11418	259.641	1	0	1	0	0	0	0.017245
11420	259.674	1	0	1	0	0	0	0.0172422
11422	259.708	1	0	1	0	0	0	0.0172851
[truncated: 7,159 more rows]

## Sheet: Mouse 1_470 Signal
FrameCounter	Timestamp	LedState	Stimulation	Output0	Output1	Input0	Input1	Region0G
7425	193.094	2	0	1	0	0	0	0.0273324
7427	193.127	2	0	1	0	0	0	0.027285
7429	193.16	2	0	1	0	0	0	0.0277934
7431	193.194	2	0	1	0	0	0	0.0279399
7433	193.227	2	0	1	0	0	0	0.0279392
7435	193.26	2	0	1	0	0	0	0.0278994
7437	193.294	2	0	1	0	0	0	0.0280187
7439	193.327	2	0	1	0	0	0	0.0280807
7441	193.36	2	0	1	0	0	0	0.0281822
7443	193.394	2	0	1	0	0	0	0.0278743
7445	193.427	2	0	1	0	0	0	0.0280386
7447	193.46	2	0	1	0	0	0	0.0279179
7449	193.494	2	0	1	0	0	0	0.0280319
7451	193.527	2	0	1	0	0	0	0.0281916
7453	193.56	2	0	1	0	0	0	0.0281278
7455	193.594	2	0	1	0	0	0	0.028146
7457	193.627	2	0	1	0	0	0	0.028057
7459	193.66	2	0	1	0	0	0	0.0280738
7461	193.694	2	0	1	0	0	0	0.0278736
7463	193.727	2	0	1	0	0	0	0.0283102
7465	193.76	2	0	1	0	0	0	0.0281236
7467	193.794	2	0	1	0	0	0	0.0281822
7469	193.827	2	0	1	0	0	0	0.0279866
7471	193.86	2	0	1	0	0	0	0.0279608
7473	193.894	2	0	1	0	0	0	0.0278353
7475	193.927	2	0	1	0	0	0	0.0277871
7477	193.96	2	0	1	0	0	0	0.0280445
7479	193.994	2	0	1	0	0	0	0.0280079
7481	194.027	2	0	1	0	0	0	0.0279231
7483	194.06	2	0	1	0	0	0	0.0277279
7485	194.094	2	0	1	0	0	0	0.027889
7487	194.127	2	0	1	0	0	0	0.0280504
7489	194.16	2	0	1	0	0	0	0.0280856
7491	194.194	2	0	1	0	0	0	0.0279053
7493	194.227	2	0	1	0	0	0	0.0279838
7495	194.26	2	0	1	0	0	0	0.027942
7497	194.294	2	0	1	0	0	0	0.0279102
7499	194.327	2	0	1	0	0	0	0.0287189
7501	194.36	2	0	1	0	0	0	0.0293061
7503	194.394	2	0	1	0	0	0	0.0295945
7505	194.427	2	0	1	0	0	0	0.0286878
7507	194.46	2	0	1	0	0	0	0.0292901
7509	194.494	2	0	1	0	0	0	0.0292521
7511	194.527	2	0	1	0	0	0	0.0291576
7513	194.56	2	0	1	0	0	0	0.0285982
7515	194.594	2	0	1	0	0	0	0.0288043
7517	194.627	2	0	1	0	0	0	0.0287618
7519	194.66	2	0	1	0	0	0	0.0285738
7521	194.694	2	0	1	0	0	0	0.0282928
7523	194.727	2	0	1	0	0	0	0.0287084
7525	194.76	2	0	1	0	0	0	0.0290951
7527	194.794	2	0	1	0	0	0	0.028971
7529	194.827	2	0	1	0	0	0	0.0292475
7531	194.86	2	0	1	0	0	0	0.0288619
7533	194.894	2	0	1	0	0	0	0.0292636
7535	194.927	2	0	1	0	0	0	0.029621
7537	194.96	2	0	1	0	0	0	0.0293221
7539	194.994	2	0	1	0	0	0	0.0289839
7541	195.027	2	0	1	0	0	0	0.0287328
7543	195.06	2	0	1	0	0	0	0.0293054
7545	195.094	2	0	1	0	0	0	0.0291269
7547	195.127	2	0	1	0	0	0	0.0290836
7549	195.16	2	0	1	0	0	0	0.0288054
7551	195.194	2	0	1	0	0	0	0.0286181
7553	195.227	2	0	1	0	0	0	0.0288517
7555	195.26	2	0	1	0	0	0	0.0290191
7557	195.294	2	0	1	0	0	0	0.0285993
7559	195.327	2	0	1	0	0	0	0.0281442
7561	195.36	2	0	1	0	0	0	0.0284723
7563	195.394	2	0	1	0	0	0	0.0281296
7565	195.427	2	0	1	0	0	0	0.0278764
7567	195.46	2	0	1	0	0	0	0.0279754
7569	195.494	2	0	1	0	0	0	0.0280574
7571	195.527	2	0	1	0	0	0	0.0279985
7573	195.56	2	0	1	0	0	0	0.0278705
7575	195.594	2	0	1	0	0	0	0.0279106
7577	195.627	2	0	1	0	0	0	0.0284912
7579	195.66	2	0	1	0	0	0	0.0284089
7581	195.694	2	0	1	0	0	0	0.0284382
7583	195.727	2	0	1	0	0	0	0.0285574
7585	195.76	2	0	1	0	0	0	0.0291631
7587	195.794	2	0	1	0	0	0	0.0292374
7589	195.827	2	0	1	0	0	0	0.0290983
7591	195.86	2	0	1	0	0	0	0.0288667
7593	195.893	2	0	1	0	0	0	0.0286669
7595	195.927	2	0	1	0	0	0	0.0286865
7597	195.96	2	0	1	0	0	0	0.028034
7599	195.993	2	0	1	0	0	0	0.0281721
7601	196.027	2	0	1	0	0	0	0.0279249
7603	196.06	2	0	1	0	0	0	0.0285344
7605	196.093	2	0	1	0	0	0	0.0284849
7607	196.127	2	0	1	0	0	0	0.0283015
7609	196.16	2	0	1	0	0	0	0.0290739
7611	196.193	2	0	1	0	0	0	0.0290561
7613	196.227	2	0	1	0	0	0	0.0289689
7615	196.26	2	0	1	0	0	0	0.0288657
7617	196.293	2	0	1	0	0	0	0.0289232
7619	196.327	2	0	1	0	0	0	0.029114
7621	196.36	2	0	1	0	0	0	0.0286066
7623	196.393	2	0	1	0	0	0	0.0286997
7625	196.427	2	0	1	0	0	0	0.0290697
7627	196.46	2	0	1	0	0	0	0.0290341
7629	196.493	2	0	1	0	0	0	0.0287081
7631	196.527	2	0	1	0	0	0	0.0292528
7633	196.56	2	0	1	0	0	0	0.0288064
7635	196.593	2	0	1	0	0	0	0.0289082
7637	196.627	2	0	1	0	0	0	0.0295446
7639	196.66	2	0	1	0	0	0	0.0292981
7641	196.693	2	0	1	0	0	0	0.0293141
7643	196.727	2	0	1	0	0	0	0.0295676
7645	196.76	2	0	1	0	0	0	0.029137
7647	196.793	2	0	1	0	0	0	0.0290972
7649	196.827	2	0	1	0	0	0	0.0291513
7651	196.86	2	0	1	0	0	0	0.0284832
7653	196.893	2	0	1	0	0	0	0.0290181
7655	196.927	2	0	1	0	0	0	0.0293134
7657	196.96	2	0	1	0	0	0	0.0292043
7659	196.993	2	0	1	0	0	0	0.0288685
7661	197.027	2	0	1	0	0	0	0.02916
7663	197.06	2	0	1	0	0	0	0.028752
7665	197.093	2	0	1	0	0	0	0.0287604
7667	197.127	2	0	1	0	0	0	0.0293724
7669	197.16	2	0	1	0	0	0	0.0286802
7671	197.193	2	0	1	0	0	0	0.0285159
7673	197.227	2	0	1	0	0	0	0.0290822
7675	197.26	2	0	1	0	0	0	0.0286847
7677	197.293	2	0	1	0	0	0	0.0284532
7679	197.327	2	0	1	0	0	0	0.029304
7681	197.36	2	0	1	0	0	0	0.0289417
7683	197.393	2	0	1	0	0	0	0.0291837
7685	197.427	2	0	1	0	0	0	0.0293225
7687	197.46	2	0	1	0	0	0	0.0286157
7689	197.493	2	0	1	0	0	0	0.029161
7691	197.527	2	0	1	0	0	0	0.0297291
7693	197.56	2	0	1	0	0	0	0.0293901
7695	197.593	2	0	1	0	0	0	0.029401
7697	197.627	2	0	1	0	0	0	0.0293518
7699	197.66	2	0	1	0	0	0	0.028896
7701	197.693	2	0	1	0	0	0	0.0292545
7703	197.727	2	0	1	0	0	0	0.0292733
7705	197.76	2	0	1	0	0	0	0.0280382
7707	197.793	2	0	1	0	0	0	0.0285574
7709	197.827	2	0	1	0	0	0	0.0285958
7711	197.86	2	0	1	0	0	0	0.0281254
7713	197.893	2	0	1	0	0	0	0.0283381
7715	197.927	2	0	1	0	0	0	0.0285452
7717	197.96	2	0	1	0	0	0	0.027868
7719	197.993	2	0	1	0	0	0	0.0284305
7721	198.027	2	0	1	0	0	0	0.0282188
7723	198.06	2	0	1	0	0	0	0.0278053
7725	198.093	2	0	1	0	0	0	0.0280591
7727	198.127	2	0	1	0	0	0	0.0286153
7729	198.16	2	0	1	0	0	0	0.028525
7731	198.193	2	0	1	0	0	0	0.0279995
7733	198.227	2	0	1	0	0	0	0.0282649
7735	198.26	2	0	1	0	0	0	0.0282833
7737	198.293	2	0	1	0	0	0	0.0283625
7739	198.327	2	0	1	0	0	0	0.0289654
7741	198.36	2	0	1	0	0	0	0.0295635
7743	198.393	2	0	1	0	0	0	0.0293249
7745	198.427	2	0	1	0	0	0	0.0289197
7747	198.46	2	0	1	0	0	0	0.0293828
7749	198.493	2	0	1	0	0	0	0.0293187
7751	198.527	2	0	1	0	0	0	0.0292266
7753	198.56	2	0	1	0	0	0	0.0289065
7755	198.593	2	0	1	0	0	0	0.0286652
7757	198.627	2	0	1	0	0	0	0.0281215
7759	198.66	2	0	1	0	0	0	0.0283559
7761	198.693	2	0	1	0	0	0	0.0274499
7763	198.727	2	0	1	0	0	0	0.0268645
7765	198.76	2	0	1	0	0	0	0.0280093
7767	198.793	2	0	1	0	0	0	0.0276002
7769	198.827	2	0	1	0	0	0	0.02721
7771	198.86	2	0	1	0	0	0	0.0277317
7773	198.893	2	0	1	0	0	0	0.0274838
7775	198.927	2	0	1	0	0	0	0.0270151
7777	198.96	2	0	1	0	0	0	0.0278788
7779	198.993	2	0	1	0	0	0	0.0283053
7781	199.027	2	0	1	0	0	0	0.0287335
7783	199.06	2	0	1	0	0	0	0.0290383
7785	199.093	2	0	1	0	0	0	0.0293267
7787	199.127	2	0	1	0	0	0	0.0292887
7789	199.16	2	0	1	0	0	0	0.0289093
7791	199.193	2	0	1	0	0	0	0.0289829
7793	199.227	2	0	1	0	0	0	0.0282701
7795	199.26	2	0	1	0	0	0	0.0278761
7797	199.293	2	0	1	0	0	0	0.0283318
7799	199.327	2	0	1	0	0	0	0.028177
7801	199.36	2	0	1	0	0	0	0.0280023
7803	199.393	2	0	1	0	0	0	0.0277833
7805	199.427	2	0	1	0	0	0	0.0283803
7807	199.46	2	0	1	0	0	0	0.02854
7809	199.493	2	0	1	0	0	0	0.0284769
7811	199.527	2	0	1	0	0	0	0.0286307
7813	199.56	2	0	1	0	0	0	0.0288748
7815	199.593	2	0	1	0	0	0	0.0280814
7817	199.627	2	0	1	0	0	0	0.0275535
7819	199.66	2	0	1	0	0	0	0.0281439
7821	199.693	2	0	1	0	0	0	0.0278081
7823	199.727	2	0	1	0	0	0	0.0277652
7825	199.76	2	0	1	0	0	0	0.0284228
7827	199.793	2	0	1	0	0	0	0.028215
7829	199.827	2	0	1	0	0	0	0.0278945
7831	199.86	2	0	1	0	0	0	0.0283064
7833	199.893	2	0	1	0	0	0	0.0290223
7835	199.927	2	0	1	0	0	0	0.0293378
7837	199.96	2	0	1	0	0	0	0.0296946
7839	199.993	2	0	1	0	0	0	0.0300489
7841	200.027	2	0	1	0	0	0	0.0301479
7843	200.06	2	0	1	0	0	0	0.0301092
7845	200.093	2	0	1	0	0	0	0.029924
7847	200.127	2	0	1	0	0	0	0.0300224
7849	200.16	2	0	1	0	0	0	0.0291499
7851	200.193	2	0	1	0	0	0	0.029333
7853	200.227	2	0	1	0	0	0	0.028471
7855	200.26	2	0	1	0	0	0	0.0284023
7857	200.293	2	0	1	0	0	0	0.027633
7859	200.327	2	0	1	0	0	0	0.0273568
7861	200.36	2	0	1	0	0	0	0.0283151
7863	200.393	2	0	1	0	0	0	0.0288521
7865	200.427	2	0	1	0	0	0	0.0287398
7867	200.46	2	0	1	0	0	0	0.0283932
7869	200.493	2	0	1	0	0	0	0.0286809
7871	200.527	2	0	1	0	0	0	0.0279737
7873	200.56	2	0	1	0	0	0	0.0274562
7875	200.593	2	0	1	0	0	0	0.0282192
7877	200.627	2	0	1	0	0	0	0.0279531
7879	200.66	2	0	1	0	0	0	0.0277641
7881	200.693	2	0	1	0	0	0	0.0275884
7883	200.727	2	0	1	0	0	0	0.0279604
7885	200.76	2	0	1	0	0	0	0.0280825
7887	200.793	2	0	1	0	0	0	0.0280351
7889	200.827	2	0	1	0	0	0	0.0280713
7891	200.86	2	0	1	0	0	0	0.0283855
7893	200.893	2	0	1	0	0	0	0.0286725
7895	200.927	2	0	1	0	0	0	0.0284152
7897	200.96	2	0	1	0	0	0	0.0281578
7899	200.993	2	0	1	0	0	0	0.0282314
7901	201.027	2	0	1	0	0	0	0.0287245
7903	201.06	2	0	1	0	0	0	0.0286481
7905	201.093	2	0	1	0	0	0	0.0282331
7907	201.127	2	0	1	0	0	0	0.0279563
7909	201.16	2	0	1	0	0	0	0.0273397
7911	201.193	2	0	1	0	0	0	0.0272623
7913	201.227	2	0	1	0	0	0	0.0271525
7915	201.26	2	0	1	0	0	0	0.0270489
7917	201.293	2	0	1	0	0	0	0.027216
7919	201.327	2	0	1	0	0	0	0.02801
7921	201.36	2	0	1	0	0	0	0.0281599
7923	201.393	2	0	1	0	0	0	0.027966
7925	201.427	2	0	1	0	0	0	0.0276599
7927	201.46	2	0	1	0	0	0	0.0275804
7929	201.493	2	0	1	0	0	0	0.0276783
7931	201.527	2	0	1	0	0	0	0.0276407
7933	201.56	2	0	1	0	0	0	0.0272515
7935	201.593	2	0	1	0	0	0	0.0272243
7937	201.627	2	0	1	0	0	0	0.0274074
7939	201.66	2	0	1	0	0	0	0.0266169
7941	201.693	2	0	1	0	0	0	0.0269202
7943	201.727	2	0	1	0	0	0	0.0275214
7945	201.76	2	0	1	0	0	0	0.0277746
7947	201.793	2	0	1	0	0	0	0.0276089
7949	201.827	2	0	1	0	0	0	0.0275131
7951	201.86	2	0	1	0	0	0	0.0278659
7953	201.893	2	0	1	0	0	0	0.0283036
7955	201.927	2	0	1	0	0	0	0.0286408
7957	201.96	2	0	1	0	0	0	0.0284113
7959	201.993	2	0	1	0	0	0	0.0286216
7961	202.027	2	0	1	0	0	0	0.0289027
7963	202.06	2	0	1	0	0	0	0.0294944
7965	202.093	2	0	1	0	0	0	0.0298208
7967	202.127	2	0	1	0	0	0	0.0304241
7969	202.16	2	0	1	0	0	0	0.0301929
7971	202.193	2	0	1	0	0	0	0.0296998
7973	202.227	2	0	1	0	0	0	0.0296405
7975	202.26	2	0	1	0	0	0	0.0291084
7977	202.293	2	0	1	0	0	0	0.0288803
7979	202.327	2	0	1	0	0	0	0.0289358
7981	202.36	2	0	1	0	0	0	0.0291998
7983	202.393	2	0	1	0	0	0	0.0284859
7985	202.427	2	0	1	0	0	0	0.028639
7987	202.46	2	0	1	0	0	0	0.0284413
7989	202.493	2	0	1	0	0	0	0.0282579
7991	202.527	2	0	1	0	0	0	0.0282338
7993	202.56	2	0	1	0	0	0	0.0283942
7995	202.593	2	0	1	0	0	0	0.0285787
7997	202.627	2	0	1	0	0	0	0.0284228
7999	202.66	2	0	1	0	0	0	0.028441
8001	202.693	2	0	1	0	0	0	0.0283935
8003	202.727	2	0	1	0	0	0	0.0284563
8005	202.76	2	0	1	0	0	0	0.028351
8007	202.793	2	0	1	0	0	0	0.0283391
8009	202.827	2	0	1	0	0	0	0.0283172
8011	202.86	2	0	1	0	0	0	0.0283813
8013	202.893	2	0	1	0	0	0	0.0284535
8015	202.927	2	0	1	0	0	0	0.0282513
8017	202.96	2	0	1	0	0	0	0.0282596
8019	202.993	2	0	1	0	0	0	0.0281442
8021	203.027	2	0	1	0	0	0	0.0280584
8023	203.06	2	0	1	0	0	0	0.0279127
8025	203.093	2	0	1	0	0	0	0.0281564
8027	203.127	2	0	1	0	0	0	0.0281303
8029	203.16	2	0	1	0	0	0	0.0280846
8031	203.193	2	0	1	0	0	0	0.0280082
8033	203.227	2	0	1	0	0	0	0.0279099
8035	203.26	2	0	1	0	0	0	0.0279343
8037	203.293	2	0	1	0	0	0	0.0277798
8039	203.327	2	0	1	0	0	0	0.0278206
8041	203.36	2	0	1	0	0	0	0.0277798
8043	203.393	2	0	1	0	0	0	0.02795
8045	203.427	2	0	1	0	0	0	0.0279779
8047	203.46	2	0	1	0	0	0	0.0280072
8049	203.493	2	0	1	0	0	0	0.0280002
8051	203.526	2	0	1	0	0	0	0.027981
8053	203.56	2	0	1	0	0	0	0.0280476
8055	203.593	2	0	1	0	0	0	0.0279071
8057	203.626	2	0	1	0	0	0	0.0279116
8059	203.66	2	0	1	0	0	0	0.028577
8061	203.693	2	0	1	0	0	0	0.0285222
8063	203.726	2	0	1	0	0	0	0.0283098
8065	203.76	2	0	1	0	0	0	0.0285735
8067	203.793	2	0	1	0	0	0	0.0284741
8069	203.826	2	0	1	0	0	0	0.0284922
8071	203.86	2	0	1	0	0	0	0.0284654
8073	203.893	2	0	1	0	0	0	0.0282408
8075	203.926	2	0	1	0	0	0	0.0282391
8077	203.96	2	0	1	0	0	0	0.0283262
8079	203.993	2	0	1	0	0	0	0.028261
8081	204.026	2	0	1	0	0	0	0.0279189
8083	204.06	2	0	1	0	0	0	0.0281801
8085	204.093	2	0	1	0	0	0	0.0271619
8087	204.126	2	0	1	0	0	0	0.0271807
8089	204.16	2	0	1	0	0	0	0.0276351
8091	204.193	2	0	1	0	0	0	0.0273174
8093	204.226	2	0	1	0	0	0	0.0272369
8095	204.26	2	0	1	0	0	0	0.0272927
8097	204.293	2	0	1	0	0	0	0.0271919
8099	204.326	2	0	1	0	0	0	0.0273593
8101	204.36	2	0	1	0	0	0	0.0276309
8103	204.393	2	0	1	0	0	0	0.0274942
8105	204.426	2	0	1	0	0	0	0.0280452
8107	204.46	2	0	1	0	0	0	0.0280082
8109	204.493	2	0	1	0	0	0	0.028291
8111	204.526	2	0	1	0	0	0	0.0283262
8113	204.56	2	0	1	0	0	0	0.0281881
8115	204.593	2	0	1	0	0	0	0.0285149
8117	204.626	2	0	1	0	0	0	0.0282809
8119	204.66	2	0	1	0	0	0	0.0284242
8121	204.693	2	0	1	0	0	0	0.0284539
8123	204.726	2	0	1	0	0	0	0.0283395
8125	204.76	2	0	1	0	0	0	0.0284019
8127	204.793	2	0	1	0	0	0	0.0283419
8129	204.826	2	0	1	0	0	0	0.0283064
8131	204.86	2	0	1	0	0	0	0.0283472
8133	204.893	2	0	1	0	0	0	0.0283489
8135	204.926	2	0	1	0	0	0	0.0284954
8137	204.96	2	0	1	0	0	0	0.0283573
8139	204.993	2	0	1	0	0	0	0.0283531
8141	205.026	2	0	1	0	0	0	0.0284218
8143	205.06	2	0	1	0	0	0	0.0283004
8145	205.093	2	0	1	0	0	0	0.0283144
8147	205.126	2	0	1	0	0	0	0.0281093
8149	205.16	2	0	1	0	0	0	0.0281526
8151	205.193	2	0	1	0	0	0	0.0280724
8153	205.226	2	0	1	0	0	0	0.0279228
8155	205.26	2	0	1	0	0	0	0.0279831
8157	205.293	2	0	1	0	0	0	0.0278792
8159	205.326	2	0	1	0	0	0	0.0279981
8161	205.36	2	0	1	0	0	0	0.0279991
8163	205.393	2	0	1	0	0	0	0.0280347
8165	205.426	2	0	1	0	0	0	0.0280658
8167	205.46	2	0	1	0	0	0	0.0280616
8169	205.493	2	0	1	0	0	0	0.0280298
8171	205.526	2	0	1	0	0	0	0.0279587
8173	205.56	2	0	1	0	0	0	0.028063
8175	205.593	2	0	1	0	0	0	0.0278865
8177	205.626	2	0	1	0	0	0	0.0279454
8179	205.66	2	0	1	0	0	0	0.0277979
8181	205.693	2	0	1	0	0	0	0.0279029
8183	205.726	2	0	1	0	0	0	0.0278576
8185	205.76	2	0	1	0	0	0	0.0278872
8187	205.793	2	0	1	0	0	0	0.0278935
8189	205.826	2	0	1	0	0	0	0.0278754
8191	205.86	2	0	1	0	0	0	0.0279102
8193	205.893	2	0	1	0	0	0	0.0279503
8195	205.926	2	0	1	0	0	0	0.0280061
8197	205.96	2	0	1	0	0	0	0.0278966
8199	205.993	2	0	1	0	0	0	0.0281254
8201	206.026	2	0	1	0	0	0	0.0279681
8203	206.06	2	0	1	0	0	0	0.0280051
8205	206.093	2	0	1	0	0	0	0.0281233
8207	206.126	2	0	1	0	0	0	0.0280232
8209	206.16	2	0	1	0	0	0	0.0280284
8211	206.193	2	0	1	0	0	0	0.0279971
8213	206.226	2	0	1	0	0	0	0.028101
8215	206.26	2	0	1	0	0	0	0.028049
8217	206.293	2	0	1	0	0	0	0.0282973
8219	206.326	2	0	1	0	0	0	0.0285117
8221	206.36	2	0	1	0	0	0	0.0286202
8223	206.393	2	0	1	0	0	0	0.0288329
8225	206.426	2	0	1	0	0	0	0.0288113
8227	206.46	2	0	1	0	0	0	0.0287642
8229	206.493	2	0	1	0	0	0	0.0286865
8231	206.526	2	0	1	0	0	0	0.0287977
8233	206.56	2	0	1	0	0	0	0.0287123
8235	206.593	2	0	1	0	0	0	0.0285093
8237	206.626	2	0	1	0	0	0	0.028592
8239	206.66	2	0	1	0	0	0	0.0286802
8241	206.693	2	0	1	0	0	0	0.0285756
8243	206.726	2	0	1	0	0	0	0.0286931
8245	206.76	2	0	1	0	0	0	0.0287157
8247	206.793	2	0	1	0	0	0	0.0289686
8249	206.826	2	0	1	0	0	0	0.0284859
8251	206.86	2	0	1	0	0	0	0.0285438
8253	206.893	2	0	1	0	0	0	0.0283269
8255	206.926	2	0	1	0	0	0	0.0278823
8257	206.96	2	0	1	0	0	0	0.0279256
8259	206.993	2	0	1	0	0	0	0.028314
8261	207.026	2	0	1	0	0	0	0.0281379
8263	207.06	2	0	1	0	0	0	0.0278712
8265	207.093	2	0	1	0	0	0	0.0278095
8267	207.126	2	0	1	0	0	0	0.0275619
8269	207.16	2	0	1	0	0	0	0.0271912
8271	207.193	2	0	1	0	0	0	0.0270576
8273	207.226	2	0	1	0	0	0	0.0274116
8275	207.26	2	0	1	0	0	0	0.0274227
8277	207.293	2	0	1	0	0	0	0.0273987
8279	207.326	2	0	1	0	0	0	0.0275692
8281	207.36	2	0	1	0	0	0	0.0276208
8283	207.393	2	0	1	0	0	0	0.0277352
8285	207.426	2	0	1	0	0	0	0.0275364
8287	207.46	2	0	1	0	0	0	0.0278217
8289	207.493	2	0	1	0	0	0	0.0275518
8291	207.526	2	0	1	0	0	0	0.0273146
8293	207.56	2	0	1	0	0	0	0.0271448
8295	207.593	2	0	1	0	0	0	0.0272421
8297	207.626	2	0	1	0	0	0	0.0272369
8299	207.66	2	0	1	0	0	0	0.0270235
8301	207.693	2	0	1	0	0	0	0.0270416
8303	207.726	2	0	1	0	0	0	0.0269318
8305	207.76	2	0	1	0	0	0	0.0273614
8307	207.793	2	0	1	0	0	0	0.0281017
8309	207.826	2	0	1	0	0	0	0.0286038
8311	207.86	2	0	1	0	0	0	0.0284842
8313	207.893	2	0	1	0	0	0	0.0281616
8315	207.926	2	0	1	0	0	0	0.0283276
8317	207.96	2	0	1	0	0	0	0.0281871
8319	207.993	2	0	1	0	0	0	0.028419
8321	208.026	2	0	1	0	0	0	0.0281383
8323	208.06	2	0	1	0	0	0	0.0278025
8325	208.093	2	0	1	0	0	0	0.02746
8327	208.126	2	0	1	0	0	0	0.0275821
8329	208.16	2	0	1	0	0	0	0.0274492
8331	208.193	2	0	1	0	0	0	0.0277606
8333	208.226	2	0	1	0	0	0	0.0279629
8335	208.26	2	0	1	0	0	0	0.0277292
8337	208.293	2	0	1	0	0	0	0.0279667
8339	208.326	2	0	1	0	0	0	0.0280159
8341	208.36	2	0	1	0	0	0	0.027754
8343	208.393	2	0	1	0	0	0	0.0275891
8345	208.426	2	0	1	0	0	0	0.0274939
8347	208.46	2	0	1	0	0	0	0.0273826
8349	208.493	2	0	1	0	0	0	0.0269485
8351	208.526	2	0	1	0	0	0	0.0263041
8353	208.56	2	0	1	0	0	0	0.0264188
8355	208.593	2	0	1	0	0	0	0.0267462
8357	208.626	2	0	1	0	0	0	0.026583
8359	208.66	2	0	1	0	0	0	0.0263428
8361	208.693	2	0	1	0	0	0	0.0266392
8363	208.726	2	0	1	0	0	0	0.0267815
8365	208.76	2	0	1	0	0	0	0.0262783
8367	208.793	2	0	1	0	0	0	0.0260729
8369	208.826	2	0	1	0	0	0	0.0263118
8371	208.86	2	0	1	0	0	0	0.0261234
8373	208.893	2	0	1	0	0	0	0.0257807
8375	208.926	2	0	1	0	0	0	0.0262915
8377	208.96	2	0	1	0	0	0	0.0269352
8379	208.993	2	0	1	0	0	0	0.0271975
8381	209.026	2	0	1	0	0	0	0.027065
8383	209.06	2	0	1	0	0	0	0.0273931
8385	209.093	2	0	1	0	0	0	0.0272693
8387	209.126	2	0	1	0	0	0	0.0266674
8389	209.16	2	0	1	0	0	0	0.0263456
8391	209.193	2	0	1	0	0	0	0.0267637
8393	209.226	2	0	1	0	0	0	0.0264844
8395	209.26	2	0	1	0	0	0	0.0263463
8397	209.293	2	0	1	0	0	0	0.0265147
8399	209.326	2	0	1	0	0	0	0.0261465
8401	209.36	2	0	1	0	0	0	0.0258595
8403	209.393	2	0	1	0	0	0	0.02684
8405	209.426	2	0	1	0	0	0	0.0273697
8407	209.46	2	0	1	0	0	0	0.0276449
8409	209.493	2	0	1	0	0	0	0.027898
8411	209.526	2	0	1	0	0	0	0.0276717
8413	209.56	2	0	1	0	0	0	0.0271985
8415	209.593	2	0	1	0	0	0	0.0276891
8417	209.626	2	0	1	0	0	0	0.0273254
8419	209.66	2	0	1	0	0	0	0.0269213
8421	209.693	2	0	1	0	0	0	0.0274489
8423	209.726	2	0	1	0	0	0	0.0269774
8425	209.76	2	0	1	0	0	0	0.0264425
8427	209.793	2	0	1	0	0	0	0.0270311
8429	209.826	2	0	1	0	0	0	0.0272923
8431	209.86	2	0	1	0	0	0	0.0268195
8433	209.893	2	0	1	0	0	0	0.0270981
8435	209.926	2	0	1	0	0	0	0.0280776
8437	209.96	2	0	1	0	0	0	0.0284361
8439	209.993	2	0	1	0	0	0	0.0286673
8441	210.026	2	0	1	0	0	0	0.0288469
8443	210.06	2	0	1	0	0	0	0.0288845
8445	210.093	2	0	1	0	0	0	0.0287775
8447	210.126	2	0	1	0	0	0	0.0283151
8449	210.16	2	0	1	0	0	0	0.0276801
8451	210.193	2	0	1	0	0	0	0.0277129
8453	210.226	2	0	1	0	0	0	0.0279622
8455	210.26	2	0	1	0	0	0	0.0278224
8457	210.293	2	0	1	0	0	0	0.0275532
8459	210.326	2	0	1	0	0	0	0.0274757
8461	210.36	2	0	1	0	0	0	0.0278684
8463	210.393	2	0	1	0	0	0	0.0277732
8465	210.426	2	0	1	0	0	0	0.0279155
8467	210.46	2	0	1	0	0	0	0.0279095
8469	210.493	2	0	1	0	0	0	0.0281672
8471	210.526	2	0	1	0	0	0	0.0277854
8473	210.56	2	0	1	0	0	0	0.027942
8475	210.593	2	0	1	0	0	0	0.0283942
8477	210.626	2	0	1	0	0	0	0.0277955
8479	210.66	2	0	1	0	0	0	0.027891
8481	210.693	2	0	1	0	0	0	0.0280556
8483	210.726	2	0	1	0	0	0	0.02817
8485	210.76	2	0	1	0	0	0	0.0276313
8487	210.793	2	0	1	0	0	0	0.0276002
8489	210.826	2	0	1	0	0	0	0.0277694
8491	210.86	2	0	1	0	0	0	0.0275162
8493	210.893	2	0	1	0	0	0	0.0274311
8495	210.926	2	0	1	0	0	0	0.0278994
8497	210.96	2	0	1	0	0	0	0.0272355
8499	210.993	2	0	1	0	0	0	0.027218
8501	211.026	2	0	1	0	0	0	0.0278701
8503	211.06	2	0	1	0	0	0	0.026915
8505	211.093	2	0	1	0	0	0	0.0268603
8507	211.126	2	0	1	0	0	0	0.0275385
8509	211.16	2	0	1	0	0	0	0.0269039
8511	211.193	2	0	1	0	0	0	0.0264429
8513	211.226	2	0	1	0	0	0	0.027194
8515	211.26	2	0	1	0	0	0	0.0270402
8517	211.293	2	0	1	0	0	0	0.0265482
8519	211.326	2	0	1	0	0	0	0.0274126
8521	211.36	2	0	1	0	0	0	0.0281208
8523	211.393	2	0	1	0	0	0	0.0286645
8525	211.426	2	0	1	0	0	0	0.0288242
8527	211.46	2	0	1	0	0	0	0.0291279
8529	211.493	2	0	1	0	0	0	0.02888
8531	211.526	2	0	1	0	0	0	0.0284769
8533	211.56	2	0	1	0	0	0	0.0281972
8535	211.593	2	0	1	0	0	0	0.0288448
8537	211.626	2	0	1	0	0	0	0.0282656
8539	211.66	2	0	1	0	0	0	0.0281784
8541	211.693	2	0	1	0	0	0	0.0285177
8543	211.726	2	0	1	0	0	0	0.0281261
8545	211.76	2	0	1	0	0	0	0.0279545
8547	211.793	2	0	1	0	0	0	0.0281313
8549	211.826	2	0	1	0	0	0	0.0282527
8551	211.86	2	0	1	0	0	0	0.0272979
8553	211.893	2	0	1	0	0	0	0.0276518
8555	211.926	2	0	1	0	0	0	0.0280417
8557	211.96	2	0	1	0	0	0	0.0278007
8559	211.993	2	0	1	0	0	0	0.027943
8561	212.026	2	0	1	0	0	0	0.0288838
8563	212.06	2	0	1	0	0	0	0.0289508
8565	212.093	2	0	1	0	0	0	0.0291046
8567	212.126	2	0	1	0	0	0	0.0293399
8569	212.159	2	0	1	0	0	0	0.0290407
8571	212.193	2	0	1	0	0	0	0.0289696
8573	212.226	2	0	1	0	0	0	0.0288535
8575	212.259	2	0	1	0	0	0	0.0291722
8577	212.293	2	0	1	0	0	0	0.0287367
8579	212.326	2	0	1	0	0	0	0.0285906
8581	212.359	2	0	1	0	0	0	0.0287224
8583	212.393	2	0	1	0	0	0	0.0282303
8585	212.426	2	0	1	0	0	0	0.0278199
8587	212.459	2	0	1	0	0	0	0.028337
8589	212.493	2	0	1	0	0	0	0.0287775
8591	212.526	2	0	1	0	0	0	0.0283566
8593	212.559	2	0	1	0	0	0	0.0283304
8595	212.593	2	0	1	0	0	0	0.0285292
8597	212.626	2	0	1	0	0	0	0.0282506
8599	212.659	2	0	1	0	0	0	0.0278942
8601	212.693	2	0	1	0	0	0	0.0281784
8603	212.726	2	0	1	0	0	0	0.0284675
8605	212.759	2	0	1	0	0	0	0.0282534
8607	212.793	2	0	1	0	0	0	0.0283998
8609	212.826	2	0	1	0	0	0	0.0288507
8611	212.859	2	0	1	0	0	0	0.0284682
8613	212.893	2	0	1	0	0	0	0.028199
8615	212.926	2	0	1	0	0	0	0.0289337
8617	212.959	2	0	1	0	0	0	0.0283684
8619	212.993	2	0	1	0	0	0	0.0283053
8621	213.026	2	0	1	0	0	0	0.0284336
8623	213.059	2	0	1	0	0	0	0.0278105
8625	213.093	2	0	1	0	0	0	0.0278307
8627	213.126	2	0	1	0	0	0	0.0283632
8629	213.159	2	0	1	0	0	0	0.0275849
8631	213.193	2	0	1	0	0	0	0.0274262
8633	213.226	2	0	1	0	0	0	0.0282973
8635	213.259	2	0	1	0	0	0	0.0277645
8637	213.293	2	0	1	0	0	0	0.027587
8639	213.326	2	0	1	0	0	0	0.0280009
8641	213.359	2	0	1	0	0	0	0.0283008
8643	213.393	2	0	1	0	0	0	0.0283409
8645	213.426	2	0	1	0	0	0	0.0282624
8647	213.459	2	0	1	0	0	0	0.0284378
8649	213.493	2	0	1	0	0	0	0.0286446
8651	213.526	2	0	1	0	0	0	0.0284441
8653	213.559	2	0	1	0	0	0	0.0284877
8655	213.593	2	0	1	0	0	0	0.0287342
8657	213.626	2	0	1	0	0	0	0.0289323
8659	213.659	2	0	1	0	0	0	0.0287276
8661	213.693	2	0	1	0	0	0	0.0287715
8663	213.726	2	0	1	0	0	0	0.0289567
8665	213.759	2	0	1	0	0	0	0.0291809
8667	213.793	2	0	1	0	0	0	0.0290446
8669	213.826	2	0	1	0	0	0	0.0288761
8671	213.859	2	0	1	0	0	0	0.028767
8673	213.893	2	0	1	0	0	0	0.0294184
8675	213.926	2	0	1	0	0	0	0.0290097
8677	213.959	2	0	1	0	0	0	0.0285362
8679	213.993	2	0	1	0	0	0	0.0282645
8681	214.026	2	0	1	0	0	0	0.0288887
8683	214.059	2	0	1	0	0	0	0.0288803
8685	214.093	2	0	1	0	0	0	0.0288685
8687	214.126	2	0	1	0	0	0	0.0288193
8689	214.159	2	0	1	0	0	0	0.0287279
8691	214.193	2	0	1	0	0	0	0.0287398
8693	214.226	2	0	1	0	0	0	0.0285634
8695	214.259	2	0	1	0	0	0	0.0287426
8697	214.293	2	0	1	0	0	0	0.0283907
8699	214.326	2	0	1	0	0	0	0.0281623
8701	214.359	2	0	1	0	0	0	0.0286502
8703	214.393	2	0	1	0	0	0	0.0280155
8705	214.426	2	0	1	0	0	0	0.0278945
8707	214.459	2	0	1	0	0	0	0.0281184
8709	214.493	2	0	1	0	0	0	0.0278387
8711	214.526	2	0	1	0	0	0	0.0275141
8713	214.559	2	0	1	0	0	0	0.0276888
8715	214.593	2	0	1	0	0	0	0.0277938
8717	214.626	2	0	1	0	0	0	0.0277948
8719	214.659	2	0	1	0	0	0	0.0281264
8721	214.693	2	0	1	0	0	0	0.028027
8723	214.726	2	0	1	0	0	0	0.0277955
8725	214.759	2	0	1	0	0	0	0.0278129
8727	214.793	2	0	1	0	0	0	0.0281763
8729	214.826	2	0	1	0	0	0	0.027973
8731	214.859	2	0	1	0	0	0	0.0279713
8733	214.893	2	0	1	0	0	0	0.0280595
8735	214.926	2	0	1	0	0	0	0.0279531
8737	214.959	2	0	1	0	0	0	0.0282788
8739	214.993	2	0	1	0	0	0	0.0285637
8741	215.026	2	0	1	0	0	0	0.028359
8743	215.059	2	0	1	0	0	0	0.0285173
8745	215.093	2	0	1	0	0	0	0.0286669
8747	215.126	2	0	1	0	0	0	0.0281467
8749	215.159	2	0	1	0	0	0	0.0283416
8751	215.193	2	0	1	0	0	0	0.0284431
8753	215.226	2	0	1	0	0	0	0.0279618
8755	215.259	2	0	1	0	0	0	0.0283949
8757	215.293	2	0	1	0	0	0	0.0283702
8759	215.326	2	0	1	0	0	0	0.0280936
8761	215.359	2	0	1	0	0	0	0.0283712
8763	215.393	2	0	1	0	0	0	0.0283273
8765	215.426	2	0	1	0	0	0	0.0280211
8767	215.459	2	0	1	0	0	0	0.0282802
8769	215.493	2	0	1	0	0	0	0.0278684
8771	215.526	2	0	1	0	0	0	0.0281038
8773	215.559	2	0	1	0	0	0	0.0286279
8775	215.593	2	0	1	0	0	0	0.0281787
8777	215.626	2	0	1	0	0	0	0.0276281
8779	215.659	2	0	1	0	0	0	0.0282952
8781	215.693	2	0	1	0	0	0	0.0280881
8783	215.726	2	0	1	0	0	0	0.0279699
8785	215.759	2	0	1	0	0	0	0.0284542
8787	215.793	2	0	1	0	0	0	0.0286927
8789	215.826	2	0	1	0	0	0	0.0283311
8791	215.859	2	0	1	0	0	0	0.0290156
8793	215.893	2	0	1	0	0	0	0.0283656
8795	215.926	2	0	1	0	0	0	0.0280971
8797	215.959	2	0	1	0	0	0	0.0284458
8799	215.993	2	0	1	0	0	0	0.0281219
8801	216.026	2	0	1	0	0	0	0.0279918
8803	216.059	2	0	1	0	0	0	0.0279189
8805	216.093	2	0	1	0	0	0	0.0280689
8807	216.126	2	0	1	0	0	0	0.0276728
8809	216.159	2	0	1	0	0	0	0.0277606
8811	216.193	2	0	1	0	0	0	0.0280005
8813	216.226	2	0	1	0	0	0	0.0276082
8815	216.259	2	0	1	0	0	0	0.0277788
8817	216.293	2	0	1	0	0	0	0.028207
8819	216.326	2	0	1	0	0	0	0.0285389
8821	216.359	2	0	1	0	0	0	0.0284434
8823	216.393	2	0	1	0	0	0	0.0284333
8825	216.426	2	0	1	0	0	0	0.0285274
8827	216.459	2	0	1	0	0	0	0.0287189
8829	216.493	2	0	1	0	0	0	0.0287614
8831	216.526	2	0	1	0	0	0	0.0291928
8833	216.559	2	0	1	0	0	0	0.0290836
8835	216.593	2	0	1	0	0	0	0.0287736
8837	216.626	2	0	1	0	0	0	0.0290264
8839	216.659	2	0	1	0	0	0	0.0288273
8841	216.693	2	0	1	0	0	0	0.0285337
8843	216.726	2	0	1	0	0	0	0.02845
8845	216.759	2	0	1	0	0	0	0.0287855
8847	216.793	2	0	1	0	0	0	0.0280009
8849	216.826	2	0	1	0	0	0	0.0284399
8851	216.859	2	0	1	0	0	0	0.0284908
8853	216.893	2	0	1	0	0	0	0.0278489
8855	216.926	2	0	1	0	0	0	0.028163
8857	216.959	2	0	1	0	0	0	0.0285159
8859	216.993	2	0	1	0	0	0	0.0277359
8861	217.026	2	0	1	0	0	0	0.0274897
8863	217.059	2	0	1	0	0	0	0.0279116
8865	217.093	2	0	1	0	0	0	0.0273021
8867	217.126	2	0	1	0	0	0	0.027618
8869	217.159	2	0	1	0	0	0	0.0277746
8871	217.193	2	0	1	0	0	0	0.0273844
8873	217.226	2	0	1	0	0	0	0.0269175
8875	217.259	2	0	1	0	0	0	0.026906
8877	217.293	2	0	1	0	0	0	0.0272215
8879	217.326	2	0	1	0	0	0	0.0267801
8881	217.359	2	0	1	0	0	0	0.0270643
8883	217.393	2	0	1	0	0	0	0.0275469
8885	217.426	2	0	1	0	0	0	0.0282129
8887	217.459	2	0	1	0	0	0	0.0281048
8889	217.493	2	0	1	0	0	0	0.0285721
8891	217.526	2	0	1	0	0	0	0.0284716
8893	217.559	2	0	1	0	0	0	0.0285508
8895	217.593	2	0	1	0	0	0	0.0276637
8897	217.626	2	0	1	0	0	0	0.0277104
8899	217.659	2	0	1	0	0	0	0.027285
8901	217.693	2	0	1	0	0	0	0.0267274
8903	217.726	2	0	1	0	0	0	0.0264812
8905	217.759	2	0	1	0	0	0	0.0260844
8907	217.793	2	0	1	0	0	0	0.0262668
8909	217.826	2	0	1	0	0	0	0.0262019
8911	217.859	2	0	1	0	0	0	0.0262319
8913	217.893	2	0	1	0	0	0	0.026339
8915	217.926	2	0	1	0	0	0	0.0261761
8917	217.959	2	0	1	0	0	0	0.0261845
8919	217.993	2	0	1	0	0	0	0.0263393
8921	218.026	2	0	1	0	0	0	0.0263808
8923	218.059	2	0	1	0	0	0	0.0268268
8925	218.093	2	0	1	0	0	0	0.0274729
8927	218.126	2	0	1	0	0	0	0.0271532
8929	218.159	2	0	1	0	0	0	0.0270329
8931	218.193	2	0	1	0	0	0	0.0264272
8933	218.226	2	0	1	0	0	0	0.0266357
8935	218.259	2	0	1	0	0	0	0.0270587
8937	218.293	2	0	1	0	0	0	0.0274555
8939	218.326	2	0	1	0	0	0	0.027701
8941	218.359	2	0	1	0	0	0	0.028147
8943	218.393	2	0	1	0	0	0	0.028555
8945	218.426	2	0	1	0	0	0	0.0286174
8947	218.459	2	0	1	0	0	0	0.0286076
8949	218.493	2	0	1	0	0	0	0.0284985
8951	218.526	2	0	1	0	0	0	0.028819
8953	218.559	2	0	1	0	0	0	0.0287914
8955	218.593	2	0	1	0	0	0	0.0282624
8957	218.626	2	0	1	0	0	0	0.028087
8959	218.659	2	0	1	0	0	0	0.0283604
8961	218.693	2	0	1	0	0	0	0.0277512
8963	218.726	2	0	1	0	0	0	0.0285145
8965	218.759	2	0	1	0	0	0	0.0286282
8967	218.793	2	0	1	0	0	0	0.0282408
8969	218.826	2	0	1	0	0	0	0.0282917
8971	218.859	2	0	1	0	0	0	0.0288521
8973	218.893	2	0	1	0	0	0	0.0283409
8975	218.926	2	0	1	0	0	0	0.0283039
8977	218.959	2	0	1	0	0	0	0.0278503
8979	218.993	2	0	1	0	0	0	0.0272766
8981	219.026	2	0	1	0	0	0	0.0278785
8983	219.059	2	0	1	0	0	0	0.0277362
8985	219.093	2	0	1	0	0	0	0.0269935
8987	219.126	2	0	1	0	0	0	0.0276313
8989	219.159	2	0	1	0	0	0	0.0275713
8991	219.193	2	0	1	0	0	0	0.0273868
8993	219.226	2	0	1	0	0	0	0.0276006
8995	219.259	2	0	1	0	0	0	0.0282697
8997	219.293	2	0	1	0	0	0	0.0281432
8999	219.326	2	0	1	0	0	0	0.0276142
9001	219.359	2	0	1	0	0	0	0.0275308
9003	219.393	2	0	1	0	0	0	0.0268669
9005	219.426	2	0	1	0	0	0	0.026855
9007	219.459	2	0	1	0	0	0	0.027036
9009	219.493	2	0	1	0	0	0	0.0264286
9011	219.526	2	0	1	0	0	0	0.0263107
9013	219.559	2	0	1	0	0	0	0.0275106
9015	219.593	2	0	1	0	0	0	0.0281787
9017	219.626	2	0	1	0	0	0	0.0283175
9019	219.659	2	0	1	0	0	0	0.0278942
9021	219.693	2	0	1	0	0	0	0.0280661
9023	219.726	2	0	1	0	0	0	0.0273
9025	219.759	2	0	1	0	0	0	0.0271277
9027	219.793	2	0	1	0	0	0	0.0277568
9029	219.826	2	0	1	0	0	0	0.0270918
9031	219.859	2	0	1	0	0	0	0.0265698
9033	219.893	2	0	1	0	0	0	0.0267818
9035	219.926	2	0	1	0	0	0	0.0273502
9037	219.959	2	0	1	0	0	0	0.0272627
9039	219.993	2	0	1	0	0	0	0.0278196
9041	220.026	2	0	1	0	0	0	0.028367
9043	220.059	2	0	1	0	0	0	0.0283698
9045	220.093	2	0	1	0	0	0	0.0280776
9047	220.126	2	0	1	0	0	0	0.0276787
9049	220.159	2	0	1	0	0	0	0.0275591
9051	220.193	2	0	1	0	0	0	0.026961
9053	220.226	2	0	1	0	0	0	0.0270765
9055	220.259	2	0	1	0	0	0	0.0277533
9057	220.293	2	0	1	0	0	0	0.0277397
9059	220.326	2	0	1	0	0	0	0.0279824
9061	220.359	2	0	1	0	0	0	0.0282806
9063	220.393	2	0	1	0	0	0	0.0284117
9065	220.426	2	0	1	0	0	0	0.0282014
9067	220.459	2	0	1	0	0	0	0.0279761
9069	220.493	2	0	1	0	0	0	0.0277523
9071	220.526	2	0	1	0	0	0	0.0280762
9073	220.559	2	0	1	0	0	0	0.0281383
9075	220.593	2	0	1	0	0	0	0.0285428
9077	220.626	2	0	1	0	0	0	0.0288214
9079	220.659	2	0	1	0	0	0	0.0281027
9081	220.692	2	0	1	0	0	0	0.0274444
9083	220.726	2	0	1	0	0	0	0.0281024
9085	220.759	2	0	1	0	0	0	0.0280093
9087	220.792	2	0	1	0	0	0	0.0278398
9089	220.826	2	0	1	0	0	0	0.0285637
9091	220.859	2	0	1	0	0	0	0.0283663
9093	220.892	2	0	1	0	0	0	0.0280609
9095	220.926	2	0	1	0	0	0	0.0280427
9097	220.959	2	0	1	0	0	0	0.0281303
9099	220.992	2	0	1	0	0	0	0.0272358
9101	221.026	2	0	1	0	0	0	0.0269914
9103	221.059	2	0	1	0	0	0	0.0274238
9105	221.092	2	0	1	0	0	0	0.0271546
9107	221.126	2	0	1	0	0	0	0.026634
9109	221.159	2	0	1	0	0	0	0.0273607
9111	221.192	2	0	1	0	0	0	0.0271863
9113	221.226	2	0	1	0	0	0	0.0268571
9115	221.259	2	0	1	0	0	0	0.0271703
9117	221.292	2	0	1	0	0	0	0.0265736
9119	221.326	2	0	1	0	0	0	0.0264673
9121	221.359	2	0	1	0	0	0	0.0270569
9123	221.392	2	0	1	0	0	0	0.0274886
9125	221.426	2	0	1	0	0	0	0.0280675
9127	221.459	2	0	1	0	0	0	0.028086
9129	221.492	2	0	1	0	0	0	0.0286774
9131	221.526	2	0	1	0	0	0	0.0286247
9133	221.559	2	0	1	0	0	0	0.0287586
9135	221.592	2	0	1	0	0	0	0.0287119
9137	221.626	2	0	1	0	0	0	0.0283928
9139	221.659	2	0	1	0	0	0	0.0282432
9141	221.692	2	0	1	0	0	0	0.0284856
9143	221.726	2	0	1	0	0	0	0.0281208
9145	221.759	2	0	1	0	0	0	0.0282279
9147	221.792	2	0	1	0	0	0	0.0278966
9149	221.826	2	0	1	0	0	0	0.0278468
9151	221.859	2	0	1	0	0	0	0.0279814
9153	221.892	2	0	1	0	0	0	0.0278914
9155	221.926	2	0	1	0	0	0	0.0276762
9157	221.959	2	0	1	0	0	0	0.0276881
9159	221.992	2	0	1	0	0	0	0.0279064
9161	222.026	2	0	1	0	0	0	0.0284371
9163	222.059	2	0	1	0	0	0	0.028252
9165	222.092	2	0	1	0	0	0	0.0277585
9167	222.126	2	0	1	0	0	0	0.0277268
9169	222.159	2	0	1	0	0	0	0.0274506
9171	222.192	2	0	1	0	0	0	0.0274663
9173	222.226	2	0	1	0	0	0	0.0273673
9175	222.259	2	0	1	0	0	0	0.027664
9177	222.292	2	0	1	0	0	0	0.0276857
9179	222.326	2	0	1	0	0	0	0.0276473
9181	222.359	2	0	1	0	0	0	0.0278848
9183	222.392	2	0	1	0	0	0	0.028095
9185	222.426	2	0	1	0	0	0	0.0283726
9187	222.459	2	0	1	0	0	0	0.0283043
9189	222.492	2	0	1	0	0	0	0.0282816
9191	222.526	2	0	1	0	0	0	0.028162
9193	222.559	2	0	1	0	0	0	0.0284797
9195	222.592	2	0	1	0	0	0	0.02826
9197	222.626	2	0	1	0	0	0	0.0282976
9199	222.659	2	0	1	0	0	0	0.0282478
9201	222.692	2	0	1	0	0	0	0.0281167
9203	222.726	2	0	1	0	0	0	0.0281149
9205	222.759	2	0	1	0	0	0	0.0280745
9207	222.792	2	0	1	0	0	0	0.0280745
9209	222.826	2	0	1	0	0	0	0.0279298
9211	222.859	2	0	1	0	0	0	0.028215
9213	222.892	2	0	1	0	0	0	0.0281174
9215	222.926	2	0	1	0	0	0	0.0281515
9217	222.959	2	0	1	0	0	0	0.0279838
9219	222.992	2	0	1	0	0	0	0.0279611
9221	223.026	2	0	1	0	0	0	0.0278237
9223	223.059	2	0	1	0	0	0	0.0277397
9225	223.092	2	0	1	0	0	0	0.0279291
9227	223.126	2	0	1	0	0	0	0.0280229
9229	223.159	2	0	1	0	0	0	0.027966
9231	223.192	2	0	1	0	0	0	0.0276989
9233	223.226	2	0	1	0	0	0	0.0277585
9235	223.259	2	0	1	0	0	0	0.0277233
9237	223.292	2	0	1	0	0	0	0.02795
9239	223.326	2	0	1	0	0	0	0.0278604
9241	223.359	2	0	1	0	0	0	0.0278565
9243	223.392	2	0	1	0	0	0	0.0276801
9245	223.426	2	0	1	0	0	0	0.027581
9247	223.459	2	0	1	0	0	0	0.0274489
9249	223.492	2	0	1	0	0	0	0.0279908
9251	223.526	2	0	1	0	0	0	0.0276755
9253	223.559	2	0	1	0	0	0	0.0274935
9255	223.592	2	0	1	0	0	0	0.0274921
9257	223.626	2	0	1	0	0	0	0.0277428
9259	223.659	2	0	1	0	0	0	0.0280926
9261	223.692	2	0	1	0	0	0	0.027852
9263	223.726	2	0	1	0	0	0	0.0272386
9265	223.759	2	0	1	0	0	0	0.0267344
9267	223.792	2	0	1	0	0	0	0.0267285
9269	223.826	2	0	1	0	0	0	0.0268289
9271	223.859	2	0	1	0	0	0	0.0263222
9273	223.892	2	0	1	0	0	0	0.0276082
9275	223.926	2	0	1	0	0	0	0.0279615
9277	223.959	2	0	1	0	0	0	0.0281648
9279	223.992	2	0	1	0	0	0	0.0282136
9281	224.026	2	0	1	0	0	0	0.0283221
9283	224.059	2	0	1	0	0	0	0.0286819
9285	224.092	2	0	1	0	0	0	0.0288803
9287	224.126	2	0	1	0	0	0	0.0287241
9289	224.159	2	0	1	0	0	0	0.0283615
9291	224.192	2	0	1	0	0	0	0.028042
9293	224.226	2	0	1	0	0	0	0.0281439
9295	224.259	2	0	1	0	0	0	0.0283081
9297	224.292	2	0	1	0	0	0	0.0277652
9299	224.326	2	0	1	0	0	0	0.0272913
9301	224.359	2	0	1	0	0	0	0.0272226
9303	224.392	2	0	1	0	0	0	0.0277244
9305	224.426	2	0	1	0	0	0	0.0273868
9307	224.459	2	0	1	0	0	0	0.0272097
9309	224.492	2	0	1	0	0	0	0.0273474
9311	224.526	2	0	1	0	0	0	0.0271689
9313	224.559	2	0	1	0	0	0	0.0268972
9315	224.592	2	0	1	0	0	0	0.0268498
9317	224.626	2	0	1	0	0	0	0.0275214
9319	224.659	2	0	1	0	0	0	0.027633
9321	224.692	2	0	1	0	0	0	0.0275664
9323	224.726	2	0	1	0	0	0	0.0271814
9325	224.759	2	0	1	0	0	0	0.0270102
9327	224.792	2	0	1	0	0	0	0.0273331
9329	224.826	2	0	1	0	0	0	0.0271696
9331	224.859	2	0	1	0	0	0	0.027224
9333	224.892	2	0	1	0	0	0	0.0268491
9335	224.926	2	0	1	0	0	0	0.0268421
9337	224.959	2	0	1	0	0	0	0.0272404
9339	224.992	2	0	1	0	0	0	0.0272853
9341	225.026	2	0	1	0	0	0	0.0277205
9343	225.059	2	0	1	0	0	0	0.0279702
9345	225.092	2	0	1	0	0	0	0.0281843
9347	225.126	2	0	1	0	0	0	0.0282757
9349	225.159	2	0	1	0	0	0	0.0284835
9351	225.192	2	0	1	0	0	0	0.0283768
9353	225.226	2	0	1	0	0	0	0.0282603
9355	225.259	2	0	1	0	0	0	0.0282889
9357	225.292	2	0	1	0	0	0	0.0283193
9359	225.326	2	0	1	0	0	0	0.0283576
9361	225.359	2	0	1	0	0	0	0.028653
9363	225.392	2	0	1	0	0	0	0.0279521
9365	225.426	2	0	1	0	0	0	0.0276037
9367	225.459	2	0	1	0	0	0	0.0278509
9369	225.492	2	0	1	0	0	0	0.0281916
9371	225.526	2	0	1	0	0	0	0.0282767
9373	225.559	2	0	1	0	0	0	0.0285278
9375	225.592	2	0	1	0	0	0	0.0283771
9377	225.626	2	0	1	0	0	0	0.0281885
9379	225.659	2	0	1	0	0	0	0.0283105
9381	225.692	2	0	1	0	0	0	0.0282495
9383	225.726	2	0	1	0	0	0	0.0282931
9385	225.759	2	0	1	0	0	0	0.0281114
9387	225.792	2	0	1	0	0	0	0.0282854
9389	225.826	2	0	1	0	0	0	0.0281714
9391	225.859	2	0	1	0	0	0	0.0278513
9393	225.892	2	0	1	0	0	0	0.0276794
9395	225.926	2	0	1	0	0	0	0.0277184
9397	225.959	2	0	1	0	0	0	0.0278795
9399	225.992	2	0	1	0	0	0	0.0283057
9401	226.026	2	0	1	0	0	0	0.0284943
9403	226.059	2	0	1	0	0	0	0.0289856
9405	226.092	2	0	1	0	0	0	0.0287074
9407	226.126	2	0	1	0	0	0	0.0291562
9409	226.159	2	0	1	0	0	0	0.0297326
9411	226.192	2	0	1	0	0	0	0.0288692
9413	226.226	2	0	1	0	0	0	0.0297887
9415	226.259	2	0	1	0	0	0	0.0293396
9417	226.292	2	0	1	0	0	0	0.0286589
9419	226.326	2	0	1	0	0	0	0.02935
9421	226.359	2	0	1	0	0	0	0.0294393
9423	226.392	2	0	1	0	0	0	0.028759
9425	226.426	2	0	1	0	0	0	0.028533
9427	226.459	2	0	1	0	0	0	0.0283921
9429	226.492	2	0	1	0	0	0	0.0280849
9431	226.526	2	0	1	0	0	0	0.0283465
9433	226.559	2	0	1	0	0	0	0.0284535
9435	226.592	2	0	1	0	0	0	0.0283883
9437	226.626	2	0	1	0	0	0	0.028275
9439	226.659	2	0	1	0	0	0	0.0283601
9441	226.692	2	0	1	0	0	0	0.0278827
9443	226.726	2	0	1	0	0	0	0.027391
9445	226.759	2	0	1	0	0	0	0.0274301
9447	226.792	2	0	1	0	0	0	0.0283343
9449	226.826	2	0	1	0	0	0	0.027723
9451	226.859	2	0	1	0	0	0	0.0275758
9453	226.892	2	0	1	0	0	0	0.0280058
9455	226.926	2	0	1	0	0	0	0.0275385
9457	226.959	2	0	1	0	0	0	0.0281623
9459	226.992	2	0	1	0	0	0	0.028352
9461	227.026	2	0	1	0	0	0	0.0283461
9463	227.059	2	0	1	0	0	0	0.0278384
9465	227.092	2	0	1	0	0	0	0.0276759
9467	227.126	2	0	1	0	0	0	0.0284971
9469	227.159	2	0	1	0	0	0	0.028178
9471	227.192	2	0	1	0	0	0	0.0276463
9473	227.226	2	0	1	0	0	0	0.0278586
9475	227.259	2	0	1	0	0	0	0.0278729
9477	227.292	2	0	1	0	0	0	0.0280818
9479	227.326	2	0	1	0	0	0	0.0284343
9481	227.359	2	0	1	0	0	0	0.0286875
9483	227.392	2	0	1	0	0	0	0.0278642
9485	227.426	2	0	1	0	0	0	0.0272895
9487	227.459	2	0	1	0	0	0	0.0271389
9489	227.492	2	0	1	0	0	0	0.0271389
9491	227.526	2	0	1	0	0	0	0.0277244
9493	227.559	2	0	1	0	0	0	0.0280616
9495	227.592	2	0	1	0	0	0	0.0273024
9497	227.626	2	0	1	0	0	0	0.0271814
9499	227.659	2	0	1	0	0	0	0.027322
9501	227.692	2	0	1	0	0	0	0.0274942
9503	227.726	2	0	1	0	0	0	0.0282813
9505	227.759	2	0	1	0	0	0	0.0279918
9507	227.792	2	0	1	0	0	0	0.0277003
9509	227.826	2	0	1	0	0	0	0.0270182
9511	227.859	2	0	1	0	0	0	0.027292
9513	227.892	2	0	1	0	0	0	0.0282879
9515	227.926	2	0	1	0	0	0	0.0273798
9517	227.959	2	0	1	0	0	0	0.0273506
9519	227.992	2	0	1	0	0	0	0.0273561
9521	228.026	2	0	1	0	0	0	0.0275005
9523	228.059	2	0	1	0	0	0	0.0283283
9525	228.092	2	0	1	0	0	0	0.0281923
9527	228.126	2	0	1	0	0	0	0.0279943
9529	228.159	2	0	1	0	0	0	0.0274084
9531	228.192	2	0	1	0	0	0	0.027406
9533	228.226	2	0	1	0	0	0	0.028004
9535	228.259	2	0	1	0	0	0	0.0277955
9537	228.292	2	0	1	0	0	0	0.0273715
9539	228.326	2	0	1	0	0	0	0.0277659
9541	228.359	2	0	1	0	0	0	0.0277571
9543	228.392	2	0	1	0	0	0	0.0281749
9545	228.426	2	0	1	0	0	0	0.0287715
9547	228.459	2	0	1	0	0	0	0.0282781
9549	228.492	2	0	1	0	0	0	0.0279608
9551	228.526	2	0	1	0	0	0	0.0278046
9553	228.559	2	0	1	0	0	0	0.0282663
9555	228.592	2	0	1	0	0	0	0.0278182
9557	228.626	2	0	1	0	0	0	0.0279719
9559	228.659	2	0	1	0	0	0	0.0278091
9561	228.692	2	0	1	0	0	0	0.0282962
9563	228.726	2	0	1	0	0	0	0.0274597
9565	228.759	2	0	1	0	0	0	0.0275347
9567	228.792	2	0	1	0	0	0	0.0276902
9569	228.826	2	0	1	0	0	0	0.0275493
9571	228.859	2	0	1	0	0	0	0.0281962
9573	228.892	2	0	1	0	0	0	0.0280968
9575	228.926	2	0	1	0	0	0	0.0272972
9577	228.959	2	0	1	0	0	0	0.0275008
9579	228.992	2	0	1	0	0	0	0.0277087
9581	229.026	2	0	1	0	0	0	0.0274904
9583	229.059	2	0	1	0	0	0	0.0273659
9585	229.092	2	0	1	0	0	0	0.0273359
9587	229.126	2	0	1	0	0	0	0.0271546
9589	229.159	2	0	1	0	0	0	0.027437
9591	229.192	2	0	1	0	0	0	0.0274541
9593	229.225	2	0	1	0	0	0	0.0273425
9595	229.259	2	0	1	0	0	0	0.0274977
9597	229.292	2	0	1	0	0	0	0.0278879
9599	229.325	2	0	1	0	0	0	0.0282276
9601	229.359	2	0	1	0	0	0	0.0274245
9603	229.392	2	0	1	0	0	0	0.0272871
9605	229.425	2	0	1	0	0	0	0.0275451
9607	229.459	2	0	1	0	0	0	0.0277568
9609	229.492	2	0	1	0	0	0	0.0275981
9611	229.525	2	0	1	0	0	0	0.028131
9613	229.559	2	0	1	0	0	0	0.0273767
9615	229.592	2	0	1	0	0	0	0.0271678
9617	229.625	2	0	1	0	0	0	0.027475
9619	229.659	2	0	1	0	0	0	0.0272784
9621	229.692	2	0	1	0	0	0	0.0271776
9623	229.725	2	0	1	0	0	0	0.027399
9625	229.759	2	0	1	0	0	0	0.0274967
9627	229.792	2	0	1	0	0	0	0.027322
9629	229.825	2	0	1	0	0	0	0.0276986
9631	229.859	2	0	1	0	0	0	0.0280058
9633	229.892	2	0	1	0	0	0	0.0285271
9635	229.925	2	0	1	0	0	0	0.0277027
9637	229.959	2	0	1	0	0	0	0.0278405
9639	229.992	2	0	1	0	0	0	0.0272212
9641	230.025	2	0	1	0	0	0	0.0274095
9643	230.059	2	0	1	0	0	0	0.0267996
9645	230.092	2	0	1	0	0	0	0.0257099
9647	230.125	2	0	1	0	0	0	0.0261175
9649	230.159	2	0	1	0	0	0	0.0265667
9651	230.192	2	0	1	0	0	0	0.0260614
9653	230.225	2	0	1	0	0	0	0.0260708
9655	230.259	2	0	1	0	0	0	0.0267361
9657	230.292	2	0	1	0	0	0	0.0267529
9659	230.325	2	0	1	0	0	0	0.0261995
9661	230.359	2	0	1	0	0	0	0.0265694
9663	230.392	2	0	1	0	0	0	0.0260572
9665	230.425	2	0	1	0	0	0	0.0259114
9667	230.459	2	0	1	0	0	0	0.0266197
9669	230.492	2	0	1	0	0	0	0.0266657
9671	230.525	2	0	1	0	0	0	0.0262026
9673	230.559	2	0	1	0	0	0	0.0267365
9675	230.592	2	0	1	0	0	0	0.026725
9677	230.625	2	0	1	0	0	0	0.0264878
9679	230.659	2	0	1	0	0	0	0.0268617
9681	230.692	2	0	1	0	0	0	0.0266559
9683	230.725	2	0	1	0	0	0	0.0266531
9685	230.759	2	0	1	0	0	0	0.0268205
9687	230.792	2	0	1	0	0	0	0.0270179
9689	230.825	2	0	1	0	0	0	0.0268672
9691	230.859	2	0	1	0	0	0	0.0269094
9693	230.892	2	0	1	0	0	0	0.027209
9695	230.925	2	0	1	0	0	0	0.0270147
9697	230.959	2	0	1	0	0	0	0.0269014
9699	230.992	2	0	1	0	0	0	0.0270528
9701	231.025	2	0	1	0	0	0	0.0273512
9703	231.059	2	0	1	0	0	0	0.0271371
9705	231.092	2	0	1	0	0	0	0.0272829
9707	231.125	2	0	1	0	0	0	0.027354
9709	231.159	2	0	1	0	0	0	0.0273349
9711	231.192	2	0	1	0	0	0	0.0272466
9713	231.225	2	0	1	0	0	0	0.0273495
9715	231.259	2	0	1	0	0	0	0.0275985
9717	231.292	2	0	1	0	0	0	0.0272184
9719	231.325	2	0	1	0	0	0	0.0273363
9721	231.359	2	0	1	0	0	0	0.0276316
9723	231.392	2	0	1	0	0	0	0.0280769
9725	231.425	2	0	1	0	0	0	0.0279357
9727	231.459	2	0	1	0	0	0	0.0276979
9729	231.492	2	0	1	0	0	0	0.0274726
9731	231.525	2	0	1	0	0	0	0.0275448
9733	231.559	2	0	1	0	0	0	0.0278698
9735	231.592	2	0	1	0	0	0	0.0275462
9737	231.625	2	0	1	0	0	0	0.0274642
9739	231.659	2	0	1	0	0	0	0.027103
9741	231.692	2	0	1	0	0	0	0.0270116
9743	231.725	2	0	1	0	0	0	0.0268254
9745	231.759	2	0	1	0	0	0	0.0269293
9747	231.792	2	0	1	0	0	0	0.0268442
9749	231.825	2	0	1	0	0	0	0.0268324
9751	231.859	2	0	1	0	0	0	0.0268568
9753	231.892	2	0	1	0	0	0	0.0272184
9755	231.925	2	0	1	0	0	0	0.0274956
9757	231.959	2	0	1	0	0	0	0.0277896
9759	231.992	2	0	1	0	0	0	0.0279869
9761	232.025	2	0	1	0	0	0	0.0280699
9763	232.059	2	0	1	0	0	0	0.0278482
9765	232.092	2	0	1	0	0	0	0.0277868
9767	232.125	2	0	1	0	0	0	0.0280504
9769	232.159	2	0	1	0	0	0	0.0279876
9771	232.192	2	0	1	0	0	0	0.0281296
9773	232.225	2	0	1	0	0	0	0.027957
9775	232.259	2	0	1	0	0	0	0.0281571
9777	232.292	2	0	1	0	0	0	0.0277864
9779	232.325	2	0	1	0	0	0	0.0277805
9781	232.359	2	0	1	0	0	0	0.0279475
9783	232.392	2	0	1	0	0	0	0.028071
9785	232.425	2	0	1	0	0	0	0.0278098
9787	232.459	2	0	1	0	0	0	0.0278447
9789	232.492	2	0	1	0	0	0	0.0279458
9791	232.525	2	0	1	0	0	0	0.0275127
9793	232.559	2	0	1	0	0	0	0.0272616
9795	232.592	2	0	1	0	0	0	0.0271466
9797	232.625	2	0	1	0	0	0	0.0270922
9799	232.659	2	0	1	0	0	0	0.0270242
9801	232.692	2	0	1	0	0	0	0.0272749
9803	232.725	2	0	1	0	0	0	0.0275476
9805	232.759	2	0	1	0	0	0	0.0283252
9807	232.792	2	0	1	0	0	0	0.0285194
9809	232.825	2	0	1	0	0	0	0.0284807
9811	232.859	2	0	1	0	0	0	0.0284019
9813	232.892	2	0	1	0	0	0	0.027965
9815	232.925	2	0	1	0	0	0	0.0273397
9817	232.959	2	0	1	0	0	0	0.0277216
9819	232.992	2	0	1	0	0	0	0.0278785
9821	233.025	2	0	1	0	0	0	0.0275089
9823	233.059	2	0	1	0	0	0	0.0271424
9825	233.092	2	0	1	0	0	0	0.0269143
9827	233.125	2	0	1	0	0	0	0.0266688
9829	233.159	2	0	1	0	0	0	0.0263804
9831	233.192	2	0	1	0	0	0	0.0267138
9833	233.225	2	0	1	0	0	0	0.0268606
9835	233.259	2	0	1	0	0	0	0.0264645
9837	233.292	2	0	1	0	0	0	0.0259271
9839	233.325	2	0	1	0	0	0	0.0256262
9841	233.359	2	0	1	0	0	0	0.026113
9843	233.392	2	0	1	0	0	0	0.0267312
9845	233.425	2	0	1	0	0	0	0.0262755
9847	233.459	2	0	1	0	0	0	0.0258661
9849	233.492	2	0	1	0	0	0	0.0254616
9851	233.525	2	0	1	0	0	0	0.0256844
9853	233.559	2	0	1	0	0	0	0.0257563
9855	233.592	2	0	1	0	0	0	0.0255986
9857	233.625	2	0	1	0	0	0	0.025282
9859	233.659	2	0	1	0	0	0	0.0258016
9861	233.692	2	0	1	0	0	0	0.0258257
9863	233.725	2	0	1	0	0	0	0.0254316
9865	233.759	2	0	1	0	0	0	0.0256269
9867	233.792	2	0	1	0	0	0	0.0260976
9869	233.825	2	0	1	0	0	0	0.0257869
9871	233.859	2	0	1	0	0	0	0.0259791
9873	233.892	2	0	1	0	0	0	0.0263505
9875	233.925	2	0	1	0	0	0	0.026181
9877	233.959	2	0	1	0	0	0	0.0261255
9879	233.992	2	0	1	0	0	0	0.0264844
9881	234.025	2	0	1	0	0	0	0.0271281
9883	234.059	2	0	1	0	0	0	0.027353
9885	234.092	2	0	1	0	0	0	0.0273879
9887	234.125	2	0	1	0	0	0	0.0266448
9889	234.159	2	0	1	0	0	0	0.0262371
9891	234.192	2	0	1	0	0	0	0.0264512
9893	234.225	2	0	1	0	0	0	0.0266221
9895	234.259	2	0	1	0	0	0	0.0266015
9897	234.292	2	0	1	0	0	0	0.0267002
9899	234.325	2	0	1	0	0	0	0.0267755
9901	234.359	2	0	1	0	0	0	0.0267222
9903	234.392	2	0	1	0	0	0	0.026703
9905	234.425	2	0	1	0	0	0	0.0263588
9907	234.459	2	0	1	0	0	0	0.026159
9909	234.492	2	0	1	0	0	0	0.0260928
9911	234.525	2	0	1	0	0	0	0.0263201
9913	234.559	2	0	1	0	0	0	0.0260432
9915	234.592	2	0	1	0	0	0	0.0258588
9917	234.625	2	0	1	0	0	0	0.0258298
9919	234.659	2	0	1	0	0	0	0.025977
9921	234.692	2	0	1	0	0	0	0.026083
9923	234.725	2	0	1	0	0	0	0.0259986
9925	234.759	2	0	1	0	0	0	0.0259871
9927	234.792	2	0	1	0	0	0	0.0255313
9929	234.825	2	0	1	0	0	0	0.0255188
9931	234.859	2	0	1	0	0	0	0.0258577
9933	234.892	2	0	1	0	0	0	0.0256593
9935	234.925	2	0	1	0	0	0	0.0258598
9937	234.959	2	0	1	0	0	0	0.0260363
9939	234.992	2	0	1	0	0	0	0.0258602
9941	235.025	2	0	1	0	0	0	0.0255864
9943	235.059	2	0	1	0	0	0	0.0258005
9945	235.092	2	0	1	0	0	0	0.0253005
9947	235.125	2	0	1	0	0	0	0.0249849
9949	235.159	2	0	1	0	0	0	0.0252569
9951	235.192	2	0	1	0	0	0	0.0253842
9953	235.225	2	0	1	0	0	0	0.0251572
9955	235.259	2	0	1	0	0	0	0.0249731
9957	235.292	2	0	1	0	0	0	0.0255021
9959	235.325	2	0	1	0	0	0	0.0252761
9961	235.359	2	0	1	0	0	0	0.0253197
9963	235.392	2	0	1	0	0	0	0.0252782
9965	235.425	2	0	1	0	0	0	0.0250958
9967	235.459	2	0	1	0	0	0	0.0249431
9969	235.492	2	0	1	0	0	0	0.0254236
9971	235.525	2	0	1	0	0	0	0.0261102
9973	235.559	2	0	1	0	0	0	0.026205
9975	235.592	2	0	1	0	0	0	0.0263878
9977	235.625	2	0	1	0	0	0	0.0267295
9979	235.659	2	0	1	0	0	0	0.0269192
9981	235.692	2	0	1	0	0	0	0.0265876
9983	235.725	2	0	1	0	0	0	0.0266821
9985	235.759	2	0	1	0	0	0	0.026031
9987	235.792	2	0	1	0	0	0	0.0256659
9989	235.825	2	0	1	0	0	0	0.025992
9991	235.859	2	0	1	0	0	0	0.0260244
9993	235.892	2	0	1	0	0	0	0.0257423
9995	235.925	2	0	1	0	0	0	0.0255279
9997	235.959	2	0	1	0	0	0	0.0256433
9999	235.992	2	0	1	0	0	0	0.0250198
10001	236.025	2	0	1	0	0	0	0.0253713
10003	236.059	2	0	1	0	0	0	0.0254421
10005	236.092	2	0	1	0	0	0	0.0255767
10007	236.125	2	0	1	0	0	0	0.0259076
10009	236.159	2	0	1	0	0	0	0.0264837
10011	236.192	2	0	1	0	0	0	0.0265238
10013	236.225	2	0	1	0	0	0	0.026537
10015	236.259	2	0	1	0	0	0	0.0273098
10017	236.292	2	0	1	0	0	0	0.0273261
10019	236.325	2	0	1	0	0	0	0.0271089
10021	236.359	2	0	1	0	0	0	0.0270161
10023	236.392	2	0	1	0	0	0	0.0266772
10025	236.425	2	0	1	0	0	0	0.0258619
10027	236.459	2	0	1	0	0	0	0.0262528
10029	236.492	2	0	1	0	0	0	0.0260394
10031	236.525	2	0	1	0	0	0	0.0255878
10033	236.559	2	0	1	0	0	0	0.0259079
10035	236.592	2	0	1	0	0	0	0.0259756
10037	236.625	2	0	1	0	0	0	0.0258365
10039	236.659	2	0	1	0	0	0	0.0263222
10041	236.692	2	0	1	0	0	0	0.0269049
10043	236.725	2	0	1	0	0	0	0.0270803
10045	236.759	2	0	1	0	0	0	0.0274935
10047	236.792	2	0	1	0	0	0	0.0280201
10049	236.825	2	0	1	0	0	0	0.0285913
10051	236.858	2	0	1	0	0	0	0.0287053
10053	236.892	2	0	1	0	0	0	0.0286885
10055	236.925	2	0	1	0	0	0	0.0283632
10057	236.958	2	0	1	0	0	0	0.0282467
10059	236.992	2	0	1	0	0	0	0.0282983
10061	237.025	2	0	1	0	0	0	0.0286634
10063	237.058	2	0	1	0	0	0	0.0284762
10065	237.092	2	0	1	0	0	0	0.0279793
10067	237.125	2	0	1	0	0	0	0.0282101
10069	237.158	2	0	1	0	0	0	0.0284535
10071	237.192	2	0	1	0	0	0	0.0284347
10073	237.225	2	0	1	0	0	0	0.0282035
10075	237.258	2	0	1	0	0	0	0.0282255
10077	237.292	2	0	1	0	0	0	0.0285076
10079	237.325	2	0	1	0	0	0	0.027904
10081	237.358	2	0	1	0	0	0	0.0275601
10083	237.392	2	0	1	0	0	0	0.0280731
10085	237.425	2	0	1	0	0	0	0.0281561
10087	237.458	2	0	1	0	0	0	0.0275416
10089	237.492	2	0	1	0	0	0	0.0273746
10091	237.525	2	0	1	0	0	0	0.0277948
10093	237.558	2	0	1	0	0	0	0.0275716
10095	237.592	2	0	1	0	0	0	0.027119
10097	237.625	2	0	1	0	0	0	0.0275912
10099	237.658	2	0	1	0	0	0	0.0280504
10101	237.692	2	0	1	0	0	0	0.0278917
10103	237.725	2	0	1	0	0	0	0.0275131
10105	237.758	2	0	1	0	0	0	0.0272163
10107	237.792	2	0	1	0	0	0	0.0274768
10109	237.825	2	0	1	0	0	0	0.0268132
10111	237.858	2	0	1	0	0	0	0.0265932
10113	237.892	2	0	1	0	0	0	0.0267044
10115	237.925	2	0	1	0	0	0	0.0270562
10117	237.958	2	0	1	0	0	0	0.0268561
10119	237.992	2	0	1	0	0	0	0.0268711
10121	238.025	2	0	1	0	0	0	0.0267466
10123	238.058	2	0	1	0	0	0	0.026628
10125	238.092	2	0	1	0	0	0	0.0263484
10127	238.125	2	0	1	0	0	0	0.0265579
10129	238.158	2	0	1	0	0	0	0.0263797
10131	238.192	2	0	1	0	0	0	0.0259453
10133	238.225	2	0	1	0	0	0	0.0261451
10135	238.258	2	0	1	0	0	0	0.0262636
10137	238.292	2	0	1	0	0	0	0.0265994
10139	238.325	2	0	1	0	0	0	0.0266064
10141	238.358	2	0	1	0	0	0	0.0270256
10143	238.392	2	0	1	0	0	0	0.0271898
10145	238.425	2	0	1	0	0	0	0.0271197
10147	238.458	2	0	1	0	0	0	0.0269649
10149	238.492	2	0	1	0	0	0	0.0270412
10151	238.525	2	0	1	0	0	0	0.0270726
10153	238.558	2	0	1	0	0	0	0.0266692
10155	238.592	2	0	1	0	0	0	0.0267407
10157	238.625	2	0	1	0	0	0	0.0269415
10159	238.658	2	0	1	0	0	0	0.0272463
10161	238.692	2	0	1	0	0	0	0.0271779
10163	238.725	2	0	1	0	0	0	0.0278231
10165	238.758	2	0	1	0	0	0	0.0279594
10167	238.792	2	0	1	0	0	0	0.0281278
10169	238.825	2	0	1	0	0	0	0.0282795
10171	238.858	2	0	1	0	0	0	0.0287649
10173	238.892	2	0	1	0	0	0	0.0288019
10175	238.925	2	0	1	0	0	0	0.0286042
10177	238.958	2	0	1	0	0	0	0.0289759
10179	238.992	2	0	1	0	0	0	0.0283977
10181	239.025	2	0	1	0	0	0	0.0278509
10183	239.058	2	0	1	0	0	0	0.0287335
10185	239.092	2	0	1	0	0	0	0.0293016
10187	239.125	2	0	1	0	0	0	0.0290324
10189	239.158	2	0	1	0	0	0	0.0290101
10191	239.192	2	0	1	0	0	0	0.0293005
10193	239.225	2	0	1	0	0	0	0.028578
10195	239.258	2	0	1	0	0	0	0.0281501
10197	239.292	2	0	1	0	0	0	0.0287994
10199	239.325	2	0	1	0	0	0	0.0284535
10201	239.358	2	0	1	0	0	0	0.0276947
10203	239.392	2	0	1	0	0	0	0.0281634
10205	239.425	2	0	1	0	0	0	0.0276536
10207	239.458	2	0	1	0	0	0	0.0271992
10209	239.492	2	0	1	0	0	0	0.0273178
10211	239.525	2	0	1	0	0	0	0.0281589
10213	239.558	2	0	1	0	0	0	0.0280508
10215	239.592	2	0	1	0	0	0	0.0281487
10217	239.625	2	0	1	0	0	0	0.0284037
10219	239.658	2	0	1	0	0	0	0.028692
10221	239.692	2	0	1	0	0	0	0.0288343
10223	239.725	2	0	1	0	0	0	0.0290965
10225	239.758	2	0	1	0	0	0	0.0293232
10227	239.792	2	0	1	0	0	0	0.0291195
10229	239.825	2	0	1	0	0	0	0.0288786
10231	239.858	2	0	1	0	0	0	0.0288235
10233	239.892	2	0	1	0	0	0	0.029213
10235	239.925	2	0	1	0	0	0	0.0286851
10237	239.958	2	0	1	0	0	0	0.0282788
10239	239.992	2	0	1	0	0	0	0.0283189
10241	240.025	2	0	1	0	0	0	0.0287789
10243	240.058	2	0	1	0	0	0	0.028276
10245	240.092	2	0	1	0	0	0	0.0280546
10247	240.125	2	0	1	0	0	0	0.0288758
10249	240.158	2	0	1	0	0	0	0.0284699
10251	240.192	2	0	1	0	0	0	0.0279088
10253	240.225	2	0	1	0	0	0	0.028404
10255	240.258	2	0	1	0	0	0	0.0289061
10257	240.292	2	0	1	0	0	0	0.0283402
10259	240.325	2	0	1	0	0	0	0.0283004
10261	240.358	2	0	1	0	0	0	0.0287255
10263	240.392	2	0	1	0	0	0	0.0288897
10265	240.425	2	0	1	0	0	0	0.0285742
10267	240.458	2	0	1	0	0	0	0.0283761
10269	240.492	2	0	1	0	0	0	0.0276588
10271	240.525	2	0	1	0	0	0	0.0270632
10273	240.558	2	0	1	0	0	0	0.0280664
10275	240.592	2	0	1	0	0	0	0.0281167
10277	240.625	2	0	1	0	0	0	0.0283193
10279	240.658	2	0	1	0	0	0	0.0280909
10281	240.692	2	0	1	0	0	0	0.0279587
10283	240.725	2	0	1	0	0	0	0.0271696
10285	240.758	2	0	1	0	0	0	0.0271825
10287	240.792	2	0	1	0	0	0	0.0276149
10289	240.825	2	0	1	0	0	0	0.0272243
10291	240.858	2	0	1	0	0	0	0.0271807
10293	240.892	2	0	1	0	0	0	0.0276686
10295	240.925	2	0	1	0	0	0	0.0283137
10297	240.958	2	0	1	0	0	0	0.028299
10299	240.992	2	0	1	0	0	0	0.028223
10301	241.025	2	0	1	0	0	0	0.0283768
10303	241.058	2	0	1	0	0	0	0.0280933
10305	241.092	2	0	1	0	0	0	0.027936
10307	241.125	2	0	1	0	0	0	0.0284591
10309	241.158	2	0	1	0	0	0	0.0277153
10311	241.192	2	0	1	0	0	0	0.0279294
10313	241.225	2	0	1	0	0	0	0.0280651
10315	241.258	2	0	1	0	0	0	0.0273031
10317	241.292	2	0	1	0	0	0	0.0273129
10319	241.325	2	0	1	0	0	0	0.0275636
10321	241.358	2	0	1	0	0	0	0.0276972
10323	241.392	2	0	1	0	0	0	0.0275036
10325	241.425	2	0	1	0	0	0	0.0285599
10327	241.458	2	0	1	0	0	0	0.0286348
10329	241.492	2	0	1	0	0	0	0.0285403
10331	241.525	2	0	1	0	0	0	0.028403
10333	241.558	2	0	1	0	0	0	0.028223
10335	241.592	2	0	1	0	0	0	0.0276428
10337	241.625	2	0	1	0	0	0	0.0279318
10339	241.658	2	0	1	0	0	0	0.0285414
10341	241.692	2	0	1	0	0	0	0.0281728
10343	241.725	2	0	1	0	0	0	0.0280591
10345	241.758	2	0	1	0	0	0	0.0282917
10347	241.792	2	0	1	0	0	0	0.0274778
10349	241.825	2	0	1	0	0	0	0.026975
10351	241.858	2	0	1	0	0	0	0.0277456
10353	241.892	2	0	1	0	0	0	0.027286
10355	241.925	2	0	1	0	0	0	0.027277
10357	241.958	2	0	1	0	0	0	0.0281847
10359	241.992	2	0	1	0	0	0	0.0287736
10361	242.025	2	0	1	0	0	0	0.0290777
10363	242.058	2	0	1	0	0	0	0.0291066
10365	242.092	2	0	1	0	0	0	0.02916
10367	242.125	2	0	1	0	0	0	0.0282722
10369	242.158	2	0	1	0	0	0	0.0281519
10371	242.192	2	0	1	0	0	0	0.028185
10373	242.225	2	0	1	0	0	0	0.0278635
10375	242.258	2	0	1	0	0	0	0.0270632
10377	242.292	2	0	1	0	0	0	0.0274151
10379	242.325	2	0	1	0	0	0	0.0266748
10381	242.358	2	0	1	0	0	0	0.0267933
10383	242.392	2	0	1	0	0	0	0.0277965
10385	242.425	2	0	1	0	0	0	0.0273317
10387	242.458	2	0	1	0	0	0	0.0271671
10389	242.492	2	0	1	0	0	0	0.0275378
10391	242.525	2	0	1	0	0	0	0.0278349
10393	242.558	2	0	1	0	0	0	0.0281895
10395	242.592	2	0	1	0	0	0	0.0287422
10397	242.625	2	0	1	0	0	0	0.0288782
10399	242.658	2	0	1	0	0	0	0.0288542
10401	242.692	2	0	1	0	0	0	0.0285756
10403	242.725	2	0	1	0	0	0	0.0285916
10405	242.758	2	0	1	0	0	0	0.0279925
10407	242.792	2	0	1	0	0	0	0.0277805
10409	242.825	2	0	1	0	0	0	0.0278136
10411	242.858	2	0	1	0	0	0	0.0268948
10413	242.892	2	0	1	0	0	0	0.0270116
10415	242.925	2	0	1	0	0	0	0.0272508
10417	242.958	2	0	1	0	0	0	0.0268216
10419	242.992	2	0	1	0	0	0	0.0266483
10421	243.025	2	0	1	0	0	0	0.0276487
10423	243.058	2	0	1	0	0	0	0.027496
10425	243.092	2	0	1	0	0	0	0.0275493
10427	243.125	2	0	1	0	0	0	0.0278363
10429	243.158	2	0	1	0	0	0	0.0279437
10431	243.192	2	0	1	0	0	0	0.0278886
10433	243.225	2	0	1	0	0	0	0.0276393
10435	243.258	2	0	1	0	0	0	0.0280107
10437	243.292	2	0	1	0	0	0	0.0279632
10439	243.325	2	0	1	0	0	0	0.0285288
10441	243.358	2	0	1	0	0	0	0.0289211
10443	243.392	2	0	1	0	0	0	0.0292437
10445	243.425	2	0	1	0	0	0	0.0295153
10447	243.458	2	0	1	0	0	0	0.0298302
10449	243.492	2	0	1	0	0	0	0.0295819
10451	243.525	2	0	1	0	0	0	0.0292922
10453	243.558	2	0	1	0	0	0	0.0289811
10455	243.592	2	0	1	0	0	0	0.0283395
10457	243.625	2	0	1	0	0	0	0.0283914
10459	243.658	2	0	1	0	0	0	0.0287199
10461	243.692	2	0	1	0	0	0	0.0292402
10463	243.725	2	0	1	0	0	0	0.0285285
10465	243.758	2	0	1	0	0	0	0.0280347
10467	243.792	2	0	1	0	0	0	0.0287227
10469	243.825	2	0	1	0	0	0	0.0284769
10471	243.858	2	0	1	0	0	0	0.0284804
10473	243.892	2	0	1	0	0	0	0.0286192
10475	243.925	2	0	1	0	0	0	0.0287091
10477	243.958	2	0	1	0	0	0	0.0288078
10479	243.992	2	0	1	0	0	0	0.0284765
10481	244.025	2	0	1	0	0	0	0.0284378
10483	244.058	2	0	1	0	0	0	0.0284915
10485	244.092	2	0	1	0	0	0	0.0286254
10487	244.125	2	0	1	0	0	0	0.0284134
10489	244.158	2	0	1	0	0	0	0.028184
10491	244.192	2	0	1	0	0	0	0.0283154
10493	244.225	2	0	1	0	0	0	0.0282384
10495	244.258	2	0	1	0	0	0	0.0283022
10497	244.292	2	0	1	0	0	0	0.0283071
10499	244.325	2	0	1	0	0	0	0.0284678
10501	244.358	2	0	1	0	0	0	0.0283684
10503	244.392	2	0	1	0	0	0	0.0284448
10505	244.425	2	0	1	0	0	0	0.0286038
10507	244.458	2	0	1	0	0	0	0.0286892
10509	244.492	2	0	1	0	0	0	0.0286945
10511	244.525	2	0	1	0	0	0	0.0285634
10513	244.558	2	0	1	0	0	0	0.0285006
10515	244.592	2	0	1	0	0	0	0.0284821
10517	244.625	2	0	1	0	0	0	0.0291415
10519	244.658	2	0	1	0	0	0	0.0290906
10521	244.692	2	0	1	0	0	0	0.029448
10523	244.725	2	0	1	0	0	0	0.0294226
10525	244.758	2	0	1	0	0	0	0.0296374
10527	244.792	2	0	1	0	0	0	0.0291635
10529	244.825	2	0	1	0	0	0	0.0289156
10531	244.858	2	0	1	0	0	0	0.0291457
10533	244.892	2	0	1	0	0	0	0.0288646
10535	244.925	2	0	1	0	0	0	0.0284375
10537	244.958	2	0	1	0	0	0	0.0281623
10539	244.992	2	0	1	0	0	0	0.0284448
10541	245.025	2	0	1	0	0	0	0.02783
10543	245.058	2	0	1	0	0	0	0.0276281
10545	245.092	2	0	1	0	0	0	0.0278091
10547	245.125	2	0	1	0	0	0	0.0280619
10549	245.158	2	0	1	0	0	0	0.0278011
10551	245.192	2	0	1	0	0	0	0.0276232
10553	245.225	2	0	1	0	0	0	0.0274032
10555	245.258	2	0	1	0	0	0	0.0277111
10557	245.292	2	0	1	0	0	0	0.0278098
10559	245.325	2	0	1	0	0	0	0.0278408
10561	245.358	2	0	1	0	0	0	0.0278457
10563	245.392	2	0	1	0	0	0	0.0276679
10565	245.425	2	0	1	0	0	0	0.0275706
10567	245.458	2	0	1	0	0	0	0.0277408
10569	245.491	2	0	1	0	0	0	0.0277868
10571	245.525	2	0	1	0	0	0	0.0276058
10573	245.558	2	0	1	0	0	0	0.0273865
10575	245.591	2	0	1	0	0	0	0.0273265
10577	245.625	2	0	1	0	0	0	0.0274824
10579	245.658	2	0	1	0	0	0	0.0272805
10581	245.691	2	0	1	0	0	0	0.0270765
10583	245.725	2	0	1	0	0	0	0.0272184
10585	245.758	2	0	1	0	0	0	0.0269698
10587	245.791	2	0	1	0	0	0	0.0267724
10589	245.825	2	0	1	0	0	0	0.026703
10591	245.858	2	0	1	0	0	0	0.0270322
10593	245.891	2	0	1	0	0	0	0.0268742
10595	245.925	2	0	1	0	0	0	0.0269583
10597	245.958	2	0	1	0	0	0	0.0267898
10599	245.991	2	0	1	0	0	0	0.027119
10601	246.025	2	0	1	0	0	0	0.0270461
10603	246.058	2	0	1	0	0	0	0.0268446
10605	246.091	2	0	1	0	0	0	0.026772
10607	246.125	2	0	1	0	0	0	0.0269136
10609	246.158	2	0	1	0	0	0	0.0270343
10611	246.191	2	0	1	0	0	0	0.0269823
10613	246.225	2	0	1	0	0	0	0.0272184
10615	246.258	2	0	1	0	0	0	0.027134
10617	246.291	2	0	1	0	0	0	0.027156
10619	246.325	2	0	1	0	0	0	0.0268951
10621	246.358	2	0	1	0	0	0	0.0271783
10623	246.391	2	0	1	0	0	0	0.0271037
10625	246.425	2	0	1	0	0	0	0.0269129
10627	246.458	2	0	1	0	0	0	0.0267849
10629	246.491	2	0	1	0	0	0	0.0269161
10631	246.525	2	0	1	0	0	0	0.0269708
10633	246.558	2	0	1	0	0	0	0.0268951
10635	246.591	2	0	1	0	0	0	0.0268505
10637	246.625	2	0	1	0	0	0	0.0268366
10639	246.658	2	0	1	0	0	0	0.0268568
10641	246.691	2	0	1	0	0	0	0.026825
10643	246.725	2	0	1	0	0	0	0.0275361
10645	246.758	2	0	1	0	0	0	0.0282879
10647	246.791	2	0	1	0	0	0	0.0283635
10649	246.825	2	0	1	0	0	0	0.0281086
10651	246.858	2	0	1	0	0	0	0.0280243
10653	246.891	2	0	1	0	0	0	0.0285529
10655	246.925	2	0	1	0	0	0	0.0283894
10657	246.958	2	0	1	0	0	0	0.0283144
10659	246.991	2	0	1	0	0	0	0.0276728
10661	247.025	2	0	1	0	0	0	0.0281017
10663	247.058	2	0	1	0	0	0	0.027904
10665	247.091	2	0	1	0	0	0	0.0277896
10667	247.125	2	0	1	0	0	0	0.0275162
10669	247.158	2	0	1	0	0	0	0.0276829
10671	247.191	2	0	1	0	0	0	0.0273732
10673	247.225	2	0	1	0	0	0	0.0268069
10675	247.258	2	0	1	0	0	0	0.0266789
10677	247.291	2	0	1	0	0	0	0.0266678
10679	247.325	2	0	1	0	0	0	0.0266413
10681	247.358	2	0	1	0	0	0	0.027217
10683	247.391	2	0	1	0	0	0	0.0280455
10685	247.425	2	0	1	0	0	0	0.0279855
10687	247.458	2	0	1	0	0	0	0.0282701
10689	247.491	2	0	1	0	0	0	0.0283472
10691	247.525	2	0	1	0	0	0	0.0284406
10693	247.558	2	0	1	0	0	0	0.0282262
10695	247.591	2	0	1	0	0	0	0.0281847
10697	247.625	2	0	1	0	0	0	0.0281379
10699	247.658	2	0	1	0	0	0	0.0283949
10701	247.691	2	0	1	0	0	0	0.0281275
10703	247.725	2	0	1	0	0	0	0.0274241
10705	247.758	2	0	1	0	0	0	0.0274778
10707	247.791	2	0	1	0	0	0	0.027345
10709	247.825	2	0	1	0	0	0	0.0273307
10711	247.858	2	0	1	0	0	0	0.0273105
10713	247.891	2	0	1	0	0	0	0.0277212
10715	247.925	2	0	1	0	0	0	0.0271514
10717	247.958	2	0	1	0	0	0	0.0273164
10719	247.991	2	0	1	0	0	0	0.0274011
10721	248.025	2	0	1	0	0	0	0.0273488
10723	248.058	2	0	1	0	0	0	0.0270172
10725	248.091	2	0	1	0	0	0	0.0270235
10727	248.125	2	0	1	0	0	0	0.0271612
10729	248.158	2	0	1	0	0	0	0.0270332
10731	248.191	2	0	1	0	0	0	0.0271235
10733	248.225	2	0	1	0	0	0	0.0265112
10735	248.258	2	0	1	0	0	0	0.0262811
10737	248.291	2	0	1	0	0	0	0.0262085
10739	248.325	2	0	1	0	0	0	0.0266242
10741	248.358	2	0	1	0	0	0	0.0272857
10743	248.391	2	0	1	0	0	0	0.0279754
10745	248.425	2	0	1	0	0	0	0.0280773
10747	248.458	2	0	1	0	0	0	0.0278987
10749	248.491	2	0	1	0	0	0	0.0281257
10751	248.525	2	0	1	0	0	0	0.0280459
10753	248.558	2	0	1	0	0	0	0.0278938
10755	248.591	2	0	1	0	0	0	0.0279852
10757	248.625	2	0	1	0	0	0	0.0279472
10759	248.658	2	0	1	0	0	0	0.0278363
10761	248.691	2	0	1	0	0	0	0.0279803
10763	248.725	2	0	1	0	0	0	0.027957
10765	248.758	2	0	1	0	0	0	0.0276958
10767	248.791	2	0	1	0	0	0	0.0278353
10769	248.825	2	0	1	0	0	0	0.0276735
10771	248.858	2	0	1	0	0	0	0.0276926
10773	248.891	2	0	1	0	0	0	0.0277369
10775	248.925	2	0	1	0	0	0	0.0275427
10777	248.958	2	0	1	0	0	0	0.0275852
10779	248.991	2	0	1	0	0	0	0.0277233
10781	249.025	2	0	1	0	0	0	0.0275866
10783	249.058	2	0	1	0	0	0	0.0278095
10785	249.091	2	0	1	0	0	0	0.0278973
10787	249.125	2	0	1	0	0	0	0.0277198
10789	249.158	2	0	1	0	0	0	0.0280009
10791	249.191	2	0	1	0	0	0	0.0279102
10793	249.225	2	0	1	0	0	0	0.0278112
10795	249.258	2	0	1	0	0	0	0.0278513
10797	249.291	2	0	1	0	0	0	0.0279005
10799	249.325	2	0	1	0	0	0	0.0277003
10801	249.358	2	0	1	0	0	0	0.0279008
10803	249.391	2	0	1	0	0	0	0.0278768
10805	249.425	2	0	1	0	0	0	0.0277533
10807	249.458	2	0	1	0	0	0	0.0279406
10809	249.491	2	0	1	0	0	0	0.0280086
10811	249.525	2	0	1	0	0	0	0.0282401
10813	249.558	2	0	1	0	0	0	0.0283513
10815	249.591	2	0	1	0	0	0	0.0285058
10817	249.625	2	0	1	0	0	0	0.0285229
10819	249.658	2	0	1	0	0	0	0.0287492
10821	249.691	2	0	1	0	0	0	0.0288737
10823	249.725	2	0	1	0	0	0	0.028797
10825	249.758	2	0	1	0	0	0	0.0285909
10827	249.791	2	0	1	0	0	0	0.0285885
10829	249.825	2	0	1	0	0	0	0.028775
10831	249.858	2	0	1	0	0	0	0.0292179
10833	249.891	2	0	1	0	0	0	0.0292475
10835	249.925	2	0	1	0	0	0	0.0291502
10837	249.958	2	0	1	0	0	0	0.0288542
10839	249.991	2	0	1	0	0	0	0.0284605
10841	250.025	2	0	1	0	0	0	0.0283813
10843	250.058	2	0	1	0	0	0	0.0283939
10845	250.091	2	0	1	0	0	0	0.0281062
10847	250.125	2	0	1	0	0	0	0.0278503
10849	250.158	2	0	1	0	0	0	0.0280288
10851	250.191	2	0	1	0	0	0	0.0279064
10853	250.225	2	0	1	0	0	0	0.0276211
10855	250.258	2	0	1	0	0	0	0.0276979
10857	250.291	2	0	1	0	0	0	0.0281815
10859	250.325	2	0	1	0	0	0	0.0279005
10861	250.358	2	0	1	0	0	0	0.0274775
10863	250.391	2	0	1	0	0	0	0.0274754
10865	250.425	2	0	1	0	0	0	0.0275134
10867	250.458	2	0	1	0	0	0	0.0269119
10869	250.491	2	0	1	0	0	0	0.0266364
10871	250.525	2	0	1	0	0	0	0.0271455
10873	250.558	2	0	1	0	0	0	0.027497
10875	250.591	2	0	1	0	0	0	0.0276647
10877	250.625	2	0	1	0	0	0	0.0269495
10879	250.658	2	0	1	0	0	0	0.0275197
10881	250.691	2	0	1	0	0	0	0.0270667
10883	250.725	2	0	1	0	0	0	0.0265628
10885	250.758	2	0	1	0	0	0	0.0267832
10887	250.791	2	0	1	0	0	0	0.0273994
10889	250.825	2	0	1	0	0	0	0.0275887
10891	250.858	2	0	1	0	0	0	0.0272993
10893	250.891	2	0	1	0	0	0	0.0273007
10895	250.925	2	0	1	0	0	0	0.0273704
10897	250.958	2	0	1	0	0	0	0.0270817
10899	250.991	2	0	1	0	0	0	0.0265782
10901	251.025	2	0	1	0	0	0	0.0267441
10903	251.058	2	0	1	0	0	0	0.0271671
10905	251.091	2	0	1	0	0	0	0.0272655
10907	251.125	2	0	1	0	0	0	0.0272114
10909	251.158	2	0	1	0	0	0	0.0271504
10911	251.191	2	0	1	0	0	0	0.027043
10913	251.225	2	0	1	0	0	0	0.0269659
10915	251.258	2	0	1	0	0	0	0.027187
10917	251.291	2	0	1	0	0	0	0.0270932
10919	251.325	2	0	1	0	0	0	0.0270754
10921	251.358	2	0	1	0	0	0	0.0269478
10923	251.391	2	0	1	0	0	0	0.0273115
10925	251.425	2	0	1	0	0	0	0.027254
10927	251.458	2	0	1	0	0	0	0.0272372
10929	251.491	2	0	1	0	0	0	0.027179
10931	251.525	2	0	1	0	0	0	0.0271277
10933	251.558	2	0	1	0	0	0	0.0271699
10935	251.591	2	0	1	0	0	0	0.0271546
10937	251.625	2	0	1	0	0	0	0.0272292
10939	251.658	2	0	1	0	0	0	0.0271061
10941	251.691	2	0	1	0	0	0	0.0270667
10943	251.725	2	0	1	0	0	0	0.0268359
10945	251.758	2	0	1	0	0	0	0.0270984
10947	251.791	2	0	1	0	0	0	0.027058
10949	251.825	2	0	1	0	0	0	0.0275573
10951	251.858	2	0	1	0	0	0	0.0277027
10953	251.891	2	0	1	0	0	0	0.0279085
10955	251.925	2	0	1	0	0	0	0.0281972
10957	251.958	2	0	1	0	0	0	0.0277767
10959	251.991	2	0	1	0	0	0	0.0279224
10961	252.025	2	0	1	0	0	0	0.0277132
10963	252.058	2	0	1	0	0	0	0.0277903
10965	252.091	2	0	1	0	0	0	0.0272721
10967	252.125	2	0	1	0	0	0	0.0274412
10969	252.158	2	0	1	0	0	0	0.0268944
10971	252.191	2	0	1	0	0	0	0.02727
10973	252.225	2	0	1	0	0	0	0.0271413
10975	252.258	2	0	1	0	0	0	0.0267417
10977	252.291	2	0	1	0	0	0	0.026339
10979	252.325	2	0	1	0	0	0	0.0267972
10981	252.358	2	0	1	0	0	0	0.0270974
10983	252.391	2	0	1	0	0	0	0.0269345
10985	252.425	2	0	1	0	0	0	0.0266169
10987	252.458	2	0	1	0	0	0	0.0262821
10989	252.491	2	0	1	0	0	0	0.0266782
10991	252.525	2	0	1	0	0	0	0.0262075
10993	252.558	2	0	1	0	0	0	0.0261175
10995	252.591	2	0	1	0	0	0	0.0259177
10997	252.625	2	0	1	0	0	0	0.0263271
10999	252.658	2	0	1	0	0	0	0.026431
11001	252.691	2	0	1	0	0	0	0.0263871
11003	252.725	2	0	1	0	0	0	0.0263532
11005	252.758	2	0	1	0	0	0	0.0262891
11007	252.791	2	0	1	0	0	0	0.0263009
11009	252.825	2	0	1	0	0	0	0.0262779
11011	252.858	2	0	1	0	0	0	0.026302
11013	252.891	2	0	1	0	0	0	0.0261789
11015	252.925	2	0	1	0	0	0	0.0262751
11017	252.958	2	0	1	0	0	0	0.0260687
11019	252.991	2	0	1	0	0	0	0.0263198
11021	253.025	2	0	1	0	0	0	0.0264669
11023	253.058	2	0	1	0	0	0	0.0264889
11025	253.091	2	0	1	0	0	0	0.0267462
11027	253.125	2	0	1	0	0	0	0.0271106
11029	253.158	2	0	1	0	0	0	0.0268596
11031	253.191	2	0	1	0	0	0	0.0265464
11033	253.225	2	0	1	0	0	0	0.0270671
11035	253.258	2	0	1	0	0	0	0.0271738
11037	253.291	2	0	1	0	0	0	0.0272362
11039	253.325	2	0	1	0	0	0	0.0269028
11041	253.358	2	0	1	0	0	0	0.0265252
11043	253.391	2	0	1	0	0	0	0.0265921
11045	253.425	2	0	1	0	0	0	0.0268484
11047	253.458	2	0	1	0	0	0	0.0266092
11049	253.491	2	0	1	0	0	0	0.0264589
11051	253.525	2	0	1	0	0	0	0.026597
11053	253.558	2	0	1	0	0	0	0.0267365
11055	253.591	2	0	1	0	0	0	0.0266748
11057	253.625	2	0	1	0	0	0	0.0263355
11059	253.658	2	0	1	0	0	0	0.0264575
11061	253.691	2	0	1	0	0	0	0.0265189
11063	253.725	2	0	1	0	0	0	0.0266838
11065	253.758	2	0	1	0	0	0	0.0265116
11067	253.791	2	0	1	0	0	0	0.0266204
11069	253.825	2	0	1	0	0	0	0.0264572
11071	253.858	2	0	1	0	0	0	0.0264795
11073	253.891	2	0	1	0	0	0	0.026507
11075	253.925	2	0	1	0	0	0	0.0268135
11077	253.958	2	0	1	0	0	0	0.0278314
11079	253.991	2	0	1	0	0	0	0.0274538
11081	254.024	2	0	1	0	0	0	0.0272752
11083	254.058	2	0	1	0	0	0	0.0268714
11085	254.091	2	0	1	0	0	0	0.0274426
11087	254.124	2	0	1	0	0	0	0.0267047
11089	254.158	2	0	1	0	0	0	0.0268118
11091	254.191	2	0	1	0	0	0	0.0273631
11093	254.224	2	0	1	0	0	0	0.0266716
11095	254.258	2	0	1	0	0	0	0.0263707
11097	254.291	2	0	1	0	0	0	0.0269237
11099	254.324	2	0	1	0	0	0	0.0269603
11101	254.358	2	0	1	0	0	0	0.0265046
11103	254.391	2	0	1	0	0	0	0.0269736
11105	254.424	2	0	1	0	0	0	0.0272599
11107	254.458	2	0	1	0	0	0	0.0272972
11109	254.491	2	0	1	0	0	0	0.0271469
11111	254.524	2	0	1	0	0	0	0.0274855
11113	254.558	2	0	1	0	0	0	0.0270852
11115	254.591	2	0	1	0	0	0	0.0268435
11117	254.624	2	0	1	0	0	0	0.0271769
11119	254.658	2	0	1	0	0	0	0.0276208
11121	254.691	2	0	1	0	0	0	0.027754
11123	254.724	2	0	1	0	0	0	0.0276947
11125	254.758	2	0	1	0	0	0	0.0276822
11127	254.791	2	0	1	0	0	0	0.0276121
11129	254.824	2	0	1	0	0	0	0.0277244
11131	254.858	2	0	1	0	0	0	0.0277728
11133	254.891	2	0	1	0	0	0	0.0277857
11135	254.924	2	0	1	0	0	0	0.0273502
11137	254.958	2	0	1	0	0	0	0.0272491
11139	254.991	2	0	1	0	0	0	0.0273572
11141	255.024	2	0	1	0	0	0	0.0273778
11143	255.058	2	0	1	0	0	0	0.0273589
11145	255.091	2	0	1	0	0	0	0.0274231
11147	255.124	2	0	1	0	0	0	0.0277108
11149	255.158	2	0	1	0	0	0	0.0281501
11151	255.191	2	0	1	0	0	0	0.0276201
11153	255.224	2	0	1	0	0	0	0.0266012
11155	255.258	2	0	1	0	0	0	0.0266758
11157	255.291	2	0	1	0	0	0	0.0260945
11159	255.324	2	0	1	0	0	0	0.0258291
11161	255.358	2	0	1	0	0	0	0.0260066
11163	255.391	2	0	1	0	0	0	0.0260307
11165	255.424	2	0	1	0	0	0	0.0262591
11167	255.458	2	0	1	0	0	0	0.0262699
11169	255.491	2	0	1	0	0	0	0.0263993
11171	255.524	2	0	1	0	0	0	0.0264484
11173	255.558	2	0	1	0	0	0	0.0266981
11175	255.591	2	0	1	0	0	0	0.02662
11177	255.624	2	0	1	0	0	0	0.0267305
11179	255.658	2	0	1	0	0	0	0.0266284
11181	255.691	2	0	1	0	0	0	0.0267229
11183	255.724	2	0	1	0	0	0	0.0266207
11185	255.758	2	0	1	0	0	0	0.0265757
11187	255.791	2	0	1	0	0	0	0.0264544
11189	255.824	2	0	1	0	0	0	0.0264115
11191	255.858	2	0	1	0	0	0	0.0265443
11193	255.891	2	0	1	0	0	0	0.0265667
11195	255.924	2	0	1	0	0	0	0.0266483
11197	255.958	2	0	1	0	0	0	0.0266395
11199	255.991	2	0	1	0	0	0	0.0267072
11201	256.024	2	0	1	0	0	0	0.0268446
11203	256.058	2	0	1	0	0	0	0.026832
11205	256.091	2	0	1	0	0	0	0.0266981
11207	256.124	2	0	1	0	0	0	0.0266423
11209	256.158	2	0	1	0	0	0	0.0268815
11211	256.191	2	0	1	0	0	0	0.0268334
11213	256.224	2	0	1	0	0	0	0.0268474
11215	256.258	2	0	1	0	0	0	0.026846
11217	256.291	2	0	1	0	0	0	0.0267863
11219	256.324	2	0	1	0	0	0	0.0267717
11221	256.358	2	0	1	0	0	0	0.0268432
11223	256.391	2	0	1	0	0	0	0.0268983
11225	256.424	2	0	1	0	0	0	0.0269474
11227	256.458	2	0	1	0	0	0	0.0267951
11229	256.491	2	0	1	0	0	0	0.0267595
11231	256.524	2	0	1	0	0	0	0.0264467
11233	256.558	2	0	1	0	0	0	0.0265541
11235	256.591	2	0	1	0	0	0	0.0265946
11237	256.624	2	0	1	0	0	0	0.026704
11239	256.658	2	0	1	0	0	0	0.0266204
11241	256.691	2	0	1	0	0	0	0.0265063
11243	256.724	2	0	1	0	0	0	0.0264164
11245	256.758	2	0	1	0	0	0	0.02643
11247	256.791	2	0	1	0	0	0	0.0266598
11249	256.824	2	0	1	0	0	0	0.0265736
11251	256.858	2	0	1	0	0	0	0.026649
11253	256.891	2	0	1	0	0	0	0.0265356
11255	256.924	2	0	1	0	0	0	0.0265966
11257	256.958	2	0	1	0	0	0	0.0264523
11259	256.991	2	0	1	0	0	0	0.0264589
11261	257.024	2	0	1	0	0	0	0.02637
11263	257.058	2	0	1	0	0	0	0.0264415
11265	257.091	2	0	1	0	0	0	0.0265224
11267	257.124	2	0	1	0	0	0	0.0264645
11269	257.158	2	0	1	0	0	0	0.0264132
11271	257.191	2	0	1	0	0	0	0.0261981
11273	257.224	2	0	1	0	0	0	0.0264209
11275	257.258	2	0	1	0	0	0	0.0264387
11277	257.291	2	0	1	0	0	0	0.0264941
11279	257.324	2	0	1	0	0	0	0.0264185
11281	257.358	2	0	1	0	0	0	0.0265384
11283	257.391	2	0	1	0	0	0	0.0264049
11285	257.424	2	0	1	0	0	0	0.0264952
11287	257.458	2	0	1	0	0	0	0.0265325
11289	257.491	2	0	1	0	0	0	0.0267152
11291	257.524	2	0	1	0	0	0	0.0266141
11293	257.558	2	0	1	0	0	0	0.0265565
11295	257.591	2	0	1	0	0	0	0.0271218
11297	257.624	2	0	1	0	0	0	0.0276239
11299	257.658	2	0	1	0	0	0	0.0273279
11301	257.691	2	0	1	0	0	0	0.0277411
11303	257.724	2	0	1	0	0	0	0.0275559
11305	257.758	2	0	1	0	0	0	0.0271326
11307	257.791	2	0	1	0	0	0	0.0269175
11309	257.824	2	0	1	0	0	0	0.026756
11311	257.858	2	0	1	0	0	0	0.02665
11313	257.891	2	0	1	0	0	0	0.026824
11315	257.924	2	0	1	0	0	0	0.0271333
11317	257.958	2	0	1	0	0	0	0.0267441
11319	257.991	2	0	1	0	0	0	0.0265708
11321	258.024	2	0	1	0	0	0	0.0269733
11323	258.058	2	0	1	0	0	0	0.0266981
11325	258.091	2	0	1	0	0	0	0.0265701
11327	258.124	2	0	1	0	0	0	0.026424
11329	258.158	2	0	1	0	0	0	0.0269363
11331	258.191	2	0	1	0	0	0	0.0268561
11333	258.224	2	0	1	0	0	0	0.0265799
11335	258.258	2	0	1	0	0	0	0.0265604
11337	258.291	2	0	1	0	0	0	0.0267149
11339	258.324	2	0	1	0	0	0	0.0267543
11341	258.358	2	0	1	0	0	0	0.0267654
11343	258.391	2	0	1	0	0	0	0.0270032
11345	258.424	2	0	1	0	0	0	0.0261709
11347	258.458	2	0	1	0	0	0	0.0260133
11349	258.491	2	0	1	0	0	0	0.0261489
11351	258.524	2	0	1	0	0	0	0.0258804
11353	258.558	2	0	1	0	0	0	0.0255481
11355	258.591	2	0	1	0	0	0	0.0257573
11357	258.624	2	0	1	0	0	0	0.0259777
11359	258.658	2	0	1	0	0	0	0.0259031
11361	258.691	2	0	1	0	0	0	0.0262584
11363	258.724	2	0	1	0	0	0	0.0264906
11365	258.758	2	0	1	0	0	0	0.0266619
11367	258.791	2	0	1	0	0	0	0.0265443
11369	258.824	2	0	1	0	0	0	0.0264446
11371	258.858	2	0	1	0	0	0	0.0263958
11373	258.891	2	0	1	0	0	0	0.0264195
11375	258.924	2	0	1	0	0	0	0.0260126
11377	258.958	2	0	1	0	0	0	0.0259976
11379	258.991	2	0	1	0	0	0	0.0264973
11381	259.024	2	0	1	0	0	0	0.026719
11383	259.058	2	0	1	0	0	0	0.026665
11385	259.091	2	0	1	0	0	0	0.0268013
11387	259.124	2	0	1	0	0	0	0.0271493
11389	259.158	2	0	1	0	0	0	0.0271901
11391	259.191	2	0	1	0	0	0	0.0272972
11393	259.224	2	0	1	0	0	0	0.0267173
11395	259.258	2	0	1	0	0	0	0.0266266
11397	259.291	2	0	1	0	0	0	0.0263557
11399	259.324	2	0	1	0	0	0	0.026787
11401	259.358	2	0	1	0	0	0	0.026537
11403	259.391	2	0	1	0	0	0	0.0260523
11405	259.424	2	0	1	0	0	0	0.0266824
11407	259.458	2	0	1	0	0	0	0.0270671
11409	259.491	2	0	1	0	0	0	0.027398
11411	259.524	2	0	1	0	0	0	0.0276027
11413	259.558	2	0	1	0	0	0	0.027958
11415	259.591	2	0	1	0	0	0	0.0282
11417	259.624	2	0	1	0	0	0	0.0280508
11419	259.658	2	0	1	0	0	0	0.0280846
11421	259.691	2	0	1	0	0	0	0.0281564
[truncated: 7,158 more rows]

## Sheet: Mouse 1_KeyDow Signal
down	381.619392	18737	52772008.63	39:32.00

## Sheet: Mouse 1_Velocity Signal
0
0.304861
0.163007
0.0811671
0.10767
0.126569
0.0416557
0.0365783
0.0452735
0.0556703
0.057856
0.0157229
0.3634
1.65902
3.47019
2.88299
3.01686
1.57435
0.0896076
0.869475
0.91094
0.182386
1.03737
0.698881
0.285913
0.15446
0.15955
1.22014
0.622727
1.11934
2.24562
1.16242
2.43056
2.06671
2.51097
4.51277
5.00336
6.81131
5.55008
6.7361
6.88951
7.25799
7.31313
6.12887
5.64669
6.28761
6.71704
3.60842
0.398736
0.311001
1.12189
0.830529
1.37048
2.01783
3.41349
5.00238
7.69022
5.71319
3.8687
2.78038
2.99065
6.18295
5.26572
4.79331
5.30732
3.77772
1.38362
0.577586
0.869002
0.992975
4.13179
4.6649
2.66725
0.206204
0.399467
0.281643
0.094517
0.0412575
0.0729902
1.01261
2.53801
2.67977
1.43225
0.556514
0.368886
1.80425
2.40879
0.832607
3.84904
2.84639
0.131559
0.876961
1.79721
0.198189
0.370989
0.299349
0.505839
0.0840015
0.0336661
0.049981
0.0859168
0.0735376
0.00199474
0.0287942
0.025126
1.69396
1.30314
1.37932
1.14628
3.18805
1.87622
1.44606
0.661759
1.30483
0.513012
0.671327
1.04722
0.605296
0.100561
0.629115
1.14761
0.189096
0.400223
0.173164
0.0548522
0.674242
0.138099
0.63491
0.241234
0.218133
0.110838
1.03438
2.41885
2.72624
3.53695
1.90964
0.451847
0.974
0.525479
0.919494
0.184542
0.146971
0.00573274
0.154919
0.186107
0.0811747
0.528123
0.595578
1.35496
0.690958
0.600668
0.484011
0.362877
0.920434
0.557138
0.632031
0.44028
0.789413
0.925297
2.54297
4.70915
6.52192
3.96976
4.66937
6.64645
3.11575
1.37758
0.226894
1.42706
3.56808
7.49174
6.7409
8.63287
9.39714
9.94157
11.6774
11.505
10.5708
9.40842
8.02869
5.39262
4.28893
1.38901
3.35996
6.0138
8.36108
7.85387
7.65904
4.43497
1.23409
3.61685
5.42632
5.18593
4.86298
5.32184
5.54491
4.28738
4.76115
5.53552
6.71109
3.55986
0.587394
0.421813
0.670425
0.806384
1.71936
3.30691
4.9295
1.76638
3.89804
2.16541
3.68861
4.92375
6.19578
4.39135
4.43473
5.60209
3.09207
1.97483
3.64368
4.43899
5.96806
4.04806
4.19608
4.00608
1.03324
0.432447
0.0907903
0.104486
0.621656
0.636101
0.74579
0.118711
0.571993
1.38881
1.30908
2.57895
3.98968
6.14624
5.28017
4.70779
0.796866
2.55272
3.80554
1.35396
0.854828
0.732349
0.770717
0.29901
0.530766
0.664189
0.895463
1.19617
1.70342
2.45248
1.24044
1.96944
5.45922
3.15681
1.92481
2.37586
4.81659
5.18445
5.39466
5.30659
7.70942
3.90282
3.87275
5.21551
6.1965
5.5662
5.8191
7.25167
6.34791
5.63447
4.03288
5.05768
8.25899
8.82332
7.06694
4.84587
2.65838
1.23625
1.11822
3.50407
3.20829
1.10188
0.695821
0.409471
0.324505
0.634821
0.330986
0.111209
0.146905
0.0782937
0.110429
0.533655
0.365471
0.0906976
0.0828505
0.203452
0.00569974
0.219299
1.68866
1.26862
1.84775
0.774915
1.4573
0.692758
3.67183
4.67813
5.06613
5.68556
2.95784
1.83489
0.631355
0.239224
0.96612
0.169599
0.604382
0.269883
0.344914
0.710019
0.1423
0.161746
1.11468
0.490829
0.401796
0.38032
0.486509
0.544834
0.588362
0.107145
0.722341
0.401833
0.270401
0.344245
0.383106
0.677211
0.53854
0.277533
0.634643
0.316256
0.310081
0.354452
0.110789
0.165404
0.307495
0.127573
0.148337
0.155524
0.705522
0.303011
0.263082
0.0626109
0.254536
0.335101
0.122724
0.218145
0.318574
0.150326
0.234677
0.30475
0.240915
0.441933
0.643324
0.0944567
0.378477
1.17167
0.676767
0.456373
0.934401
0.71139
0.265283
0.489437
0.313105
0.12658
0.335251
0.589164
0.108995
1.56214
3.42456
4.55083
0.324175
0.488961
0.444067
0.794136
0.320321
0.251804
0.812957
0.228363
0.304659
0.204783
0.153693
0.152724
1.51038
1.6232
1.00369
1.04592
0.243467
0.428794
0.125614
0.0716701
0.2612
0.544287
0.581223
0.151854
0.138713
0.233454
0.108871
0.463933
0.165243
0.0781349
0.0580698
0.134447
0.481042
0.169765
1.71668
1.11977
0.665583
1.10395
0.106978
0.116278
0.866383
1.15946
1.8588
1.01231
1.98259
1.33164
1.34369
1.53353
1.31625
1.81898
0.905662
0.364113
1.47569
1.24596
0.314175
0.652131
2.59006
2.09479
0.840381
0.214682
0.577911
0.418579
0.322571
0.10748
0.0799907
0.146694
0.0554587
0.144099
0.16019
0.122872
0.227073
0.550846
0.94604
3.57821
5.3495
2.19799
2.67377
1.25406
1.98156
0.817013
0.222211
0.388083
2.64881
7.08473
4.50058
4.17192
3.03247
3.60624
5.96052
4.57521
3.01945
2.55306
0.890405
1.25334
4.12301
6.07523
4.76859
4.74262
4.15709
6.19664
6.40506
7.90886
4.75363
3.03609
4.64161
4.33023
4.15122
4.82162
5.55451
3.1208
5.49004
7.59839
3.74695
1.86771
0.784451
0.169198
0.213356
1.46695
1.64057
5.3096
3.96894
1.76952
0.14632
0.807654
0.80633
0.0663924
0.0181949
0.171487
0.0980893
0.2548
0.827256
1.0101
0.25226
0.304548
0.227655
0.187514
0.0820424
0.335773
0.0401952
0.202371
0.0635177
0.162531
0.0391288
0.163966
0.131499
0.0487314
0.072871
0.084517
0.0623697
0.0748992
0.436404
0.651088
0.709256
1.23407
2.10671
2.15452
0.690985
1.60751
1.04005
0.411517
3.43874
1.20022
1.36168
0.767306
0.370935
1.27847
1.81783
0.90667
1.17578
1.48666
0.78972
4.08509
0.262679
3.82729
0.661588
0.0786731
3.13872
0.572282
1.13785
4.48304
0.861957
2.45532
0.449785
0.885719
1.38294
0.703987
0.880047
2.13186
1.93433
1.94984
1.92921
0.975399
0.374171
0.376923
0.0929824
0.114799
0.0745836
0.0347606
0.121225
0.0466054
0.112516
1.09192
0.683361
0.207797
0.40654
0.357476
0.343565
0.225476
0.049872
0.181737
0.0959278
0.0979672
0.0860568
0.596568
0.865244
1.90827
0.136319
0.106314
0.120923
0.172774
0.115185
0.0381793
1.13348
4.65791
6.047
4.2736
1.98033
0.407271
0.204389
0.222445
0.160902
0.0565646
0.179764
0.386204
1.01614
1.5923
0.659647
0.313113
0.952948
0.418252
1.28745
3.68387
2.15369
1.23608
0.354448
0.135373
0.0696461
0.0827535
0.132738
0.0604371
0.117824
0.0932938
0.0373035
0.0779667
0.132283
0.0313163
0.0276808
0.0577253
0.622782
0.425997
1.34222
0.626213
1.80677
2.00284
0.836291
1.3563
0.661384
0.17919
0.269223
0.177794
0.262078
0.154142
0.249539
0.190494
0.708151
0.900647
0.738925
2.15618
0.884649
1.55134
0.428177
0.764695
0.149591
0.346013
0.257476
0.35087
0.378026
0.458184
0.0957078
0.365445
0.431751
0.765501
0.979001
0.259506
2.65165
0.137982
0.385422
0.48991
1.31035
0.433825
0.901314
0.0531718
0.230174
0.126563
0.197597
0.69249
0.329934
0.95016
0.0244412
1.09966
0.333016
1.2596
0.219068
0.0866946
0.326464
0.146355
0.149867
0.576161
0.403063
0.122983
0.107821
0.223083
0.155085
0.0771318
0.775634
0.0891086
0.25291
0.0818883
0.988238
0.600889
0.337571
0.262915
0.402767
0.228502
1.0696
1.15556
0.690308
0.334244
0.881785
0.222629
0.347895
0.488579
0.400285
0.0966628
0.855624
0.288896
0.561011
0.193055
0.92025
0.712464
2.8823
4.70058
4.56164
0.902349
0.939743
1.6176
0.781599
0.67927
0.786626
0.834019
1.18627
0.819582
1.4625
3.12242
1.93382
0.85645
0.704353
0.483496
1.07684
0.732609
2.00156
1.25505
0.242969
0.165247
1.9662
1.85947
1.55106
1.1142
0.857235
0.229005
0.718809
0.305209
0.194982
1.9928
3.50061
6.25943
4.08895
0.940704
3.01943
2.64804
1.56117
0.937024
1.40752
0.57472
0.697863
0.179539
0.393278
1.15656
0.56864
0.816357
0.733352
0.502714
0.161004
0.508295
0.382879
2.08858
3.62
3.5834
5.94521
3.46219
0.849795
0.0683794
0.261525
0.0514317
0.0431606
0.0229664
0.122226
0.070373
0.055248
0.0283135
0.0604125
0.17864
1.0075
0.852109
0.977395
0.685224
0.339648
0.0172766
0.427097
0.0284631
0.556812
0.4145
0.206485
0.358867
0.153367
0.0717992
0.12111
0.375318
0.102761
0.158305
0.125184
0.0775199
0.0650825
0.227331
1.05244
0.579811
0.547037
0.229101
0.795888
0.0280376
0.173454
0.37404
0.551597
0.468525
0.310501
0.383587
0.538516
0.457241
0.431039
0.447819
0.327943
0.482052
0.177959
0.291371
0.293492
0.301412
0.194644
0.0563827
0.148009
0.289562
0.236675
0.342839
0.211086
0.275392
0.198738
0.441732
1.34289
2.15848
4.57544
1.76661
2.80781
4.2755
3.13517
2.09886
1.23577
0.793965
0.257157
0.24074
1.3153
0.641479
0.239536
0.387999
0.355085
0.170551
0.0682823
0.0249168
0.0354693
0.0679616
0.0259795
0.0426689
0.0997242
0.0662557
0.0598355
0.0612618
0.361765
0.0289731
0.0495584
0.139944
0.0114356
0.0694406
0.0246216
0.0342661
0.0625908
0.0438522
0.0583133
0.0925759
0.0379048
0.0238243
0.510928
0.725322
1.12642
0.263949
0.226342
0.515783
0.519495
0.434637
0.337445
0.270888
0.369549
0.0557422
0.117681
0.112546
0.227685
0.0284826
0.0531748
0.24263
0.0863829
0.209398
0.943313
0.574558
0.938174
0.315519
0.345443
0.158299
0.00375445
0.351859
0.162968
0.476652
0.0721191
0.201658
0.41362
0.140957
0.150824
0.16845
0.0762325
0.0946745
0.857729
2.65211
3.29575
5.0587
2.64236
2.2037
5.40526
7.38287
7.23259
5.13395
5.10155
6.00952
5.8908
7.75057
7.3377
4.44956
3.78923
2.63857
1.86139
1.85593
1.62088
4.48321
5.03727
5.3789
7.05639
8.17285
5.98981
3.66143
1.96176
4.13529
6.73923
5.25724
6.05006
4.78741
3.5632
4.70065
4.60034
4.96155
2.23342
0.470526
0.870861
0.931166
0.712134
1.05493
1.97786
1.62227
1.13416
0.792641
0.0778343
0.552924
0.0733815
0.854538
0.90553
0.928298
2.83306
1.96494
2.41724
0.729497
0.995621
0.252022
0.21012
0.21238
0.206827
0.150069
0.351743
0.254052
0.312682
1.40516
0.557342
1.00107
0.0616227
0.376584
0.346417
0.841438
0.0825514
0.704706
0.0862402
0.162021
0.140989
0.102697
0.0365744
0.190878
0.193755
0.143088
0.221401
0.114746
0.155
0.727741
0.387751
1.61746
3.54578
4.75243
3.5992
3.24007
2.97433
3.41122
1.4555
0.96068
0.469864
0.495646
1.65409
0.556984
0.463215
0.348597
0.163845
1.7819
0.36469
0.0759559
0.134551
0.236594
0.0615488
0.0973773
0.25493
0.0874859
0.084211
0.157885
0.0708473
0.0104894
0.130696
0.140817
0.156619
0.0264279
0.0870132
0.0804286
0.137171
0.203713
1.49418
1.77072
6.21988
7.48488
4.23187
4.86736
4.86553
3.56305
1.60548
2.15547
0.592619
1.07953
1.57171
0.97721
0.697541
1.16356
0.301734
0.330114
0.204393
0.239452
0.120862
0.0945998
0.0317714
0.110212
0.0854507
0.0550453
0.0814706
0.025385
0.0623024
0.105462
0.062955
0.211181
0.164875
0.088926
0.07122
0.683811
0.0596515
0.703706
0.130853
0.12417
0.0877383
0.0410466
0.0179433
0.0975883
0.0217232
0.00868375
0.0364483
0.0329156
0.0799965
0.0770301
0.403411
0.379852
0.3063
0.290409
0.302895
0.296387
0.311812
0.302887
0.163109
0.247031
0.0407583
0.0765713
0.129511
0.175156
0.357313
0.956023
0.2273
0.563015
0.255813
0.180103
0.148177
0.075661
0.04633
0.0241312
0.0699781
0.36495
1.08023
0.941615
1.60498
1.65841
1.0576
1.25971
1.82914
0.843395
0.277089
0.313677
0.313164
0.255452
0.256643
0.115919
0.0558021
0.081548
0.0608441
0.0357526
0.199064
0.0761786
0.105577
0.0665173
0.144485
0.0276962
0.160032
0.0258907
0.0422086
0.166897
0.0609139
0.155061
0.0635625
0.158047
0.203622
0.0652197
0.261188
0.673086
0.59341
0.258948
0.651643
0.0588879
0.235869
0.105789
0.093415
0.130705
0.0305372
0.212288
0.0954559
0.06873
0.0836685
0.0449611
0.0388274
0.562687
0.388111
0.11265
0.250513
0.224546
0.353466
0.508401
0.439026
0.239194
0.277856
0.121439
0.1755
0.0306389
0.637126
0.45023
0.309313
0.13225
0.521983
0.576083
0.404586
0.256885
0.477125
0.253207
0.541997
0.652047
0.492746
0.753276
2.12065
3.64082
4.3847
3.76281
2.59275
4.59859
5.83963
3.19069
2.45717
0.289344
0.189928
0.150362
0.121886
0.107354
0.01289
0.0583339
0.0658904
0.0439101
0.0449658
0.0329783
0.0370308
0.0907061
0.457935
1.08948
2.13556
2.0009
1.05686
2.88682
4.46316
3.41743
3.12152
0.962357
0.883154
1.9415
3.00414
4.69649
2.30858
2.44942
0.740507
0.3228
0.114503
0.222673
0.281294
0.120188
0.328974
0.0197942
0.033554
0.0526727
0.0633292
0.0685533
0.165373
1.58039
1.80019
0.804039
0.195174
0.279303
0.289681
0.104324
0.0677805
0.353345
0.832233
0.427894
0.108796
0.0965193
0.243244
0.015002
0.0813508
0.0666199
0.0695477
0.098463
0.0503554
0.0682644
0.0240525
0.0565488
0.0765887
0.107106
0.0727876
0.0424365
0.00946258
0.0531638
0.0374295
0.0231356
0.160891
0.0568435
0.024455
0.0819814
0.0595914
0.0297636
0.0437757
0.0365491
0.298923
0.682376
0.605009
0.350859
0.52528
2.26786
2.85699
2.76887
2.89018
3.29028
4.40152
3.1639
1.88118
0.6495
0.316511
0.550147
0.573154
1.16833
0.0429142
0.251587
0.105688
0.0240022
0.537627
0.0298495
0.0541608
0.416888
0.451265
0.518543
0.638409
0.703444
2.11533
3.17461
3.70234
2.32531
3.43267
4.94257
3.68679
1.80078
0.804882
0.261713
0.667432
0.401062
1.53558
5.24865
6.36369
6.31613
7.2838
6.40082
6.78973
6.20133
4.52752
5.14118
5.38948
3.75457
0.342842
0.458084
0.637401
0.352303
0.561826
2.01435
0.706667
3.42389
4.59588
6.20769
4.82717
4.50036
2.04422
2.55775
8.65817
7.5236
3.80527
7.41628
5.99844
4.35737
2.07447
1.59487
1.09581
1.99872
0.83514
0.897797
0.0921151
1.98215
1.63391
0.118634
0.296456
0.100052
0.945068
0.531222
2.31804
1.6736
0.863087
0.837207
0.495429
0.365851
0.288297
0.812941
0.857564
0.129452
0.686131
0.502097
0.52884
0.612451
0.467492
0.252233
0.321918
0.221578
0.94876
4.50884
2.67886
3.23673
1.02116
1.06469
0.537211
0.513187
0.388413
0.262864
0.534596
0.00833668
0.143119
0.0452386
0.11799
0.0591672
2.36361
3.83494
1.27291
1.45705
1.07943
0.701458
0.57749
0.493458
0.152739
0.196986
0.0536747
0.172857
0.218538
0.221684
0.0432234
0.014022
1.05309
0.280829
0.643148
0.156065
0.325235
0.442154
0.443903
0.0622072
0.0657313
0.00180891
0.0282187
0.0827828
0.124283
0.84922
0.845068
3.66182
2.09373
1.28937
0.539903
1.81254
0.961201
1.4769
2.75063
1.68922
0.710659
0.357079
0.400092
0.876237
0.44273
0.939732
0.697634
1.44521
1.84227
1.59089
2.2733
3.32379
1.40987
0.775379
2.05038
1.95336
0.91146
0.465433
0.170551
0.228836
0.232595
0.245969
0.286468
1.3306
0.573187
0.764156
1.51991
1.81157
1.36543
1.03518
1.77185
1.32345
0.830184
0.0973633
0.716492
1.03301
0.133531
0.178709
1.63889
3.32162
2.64473
2.01267
1.80471
1.09421
0.606213
0.751539
2.27746
0.679995
0.803558
0.562655
0.474218
0.892385
1.11397
1.56956
0.753454
3.08318
4.243
2.59485
2.32753
0.203148
1.30969
1.12715
0.215286
0.0602231
0.141447
0.0471539
0.120453
0.10686
0.14306
0.680308
1.40285
0.513024
0.431717
0.352412
0.464749
0.38317
0.186708
0.314053
0.295738
0.399815
1.0116
2.41405
3.71508
2.80222
3.02591
2.42568
2.8167
5.31711
3.93061
1.91221
0.864093
0.254802
0.612586
1.05431
0.707444
0.805381
0.165778
0.229073
1.78535
0.807444
0.349178
0.388321
0.36541
0.854248
1.70076
3.18522
4.82511
1.61195
0.403951
0.754802
0.0461642
0.101289
0.193403
0.201057
0.285113
2.8474
0.716334
1.38711
0.41875
0.684068
0.353982
1.47272
2.768
1.00385
0.281382
0.250655
0.78258
0.908793
1.117
0.543992
0.395829
0.572822
0.151478
1.9534
1.58247
0.605261
0.361501
0.509514
0.661093
0.0940061
0.164576
1.14355
2.94427
3.07388
3.37941
4.36805
3.04549
3.01946
5.14693
5.00081
2.78181
8.53985
10.3311
8.7861
8.80999
5.77711
5.96377
7.18613
6.54095
7.14405
2.56968
1.9385
0.919063
0.986791
1.39565
0.559253
2.11881
1.75441
0.902585
0.596063
1.11066
0.561907
0.262869
2.77703
6.73205
3.58571
2.67779
1.45459
0.943861
0.97557
0.442864
0.867529
0.61912
1.2417
3.23223
6.64571
7.81272
6.84889
7.32154
5.78705
1.00346
1.27413
0.438596
0.706831
1.33925
0.0727389
1.06288
0.373172
0.441423
0.43078
0.326808
0.617427
0.632279
0.177418
0.783504
1.10241
1.61447
2.56703
3.06705
3.73306
1.7696
0.892681
0.807296
0.703796
0.108875
0.250765
0.817944
0.371723
0.919099
1.2566
0.0615124
0.525009
0.0977313
0.131422
0.29898
0.209508
0.16432
0.106799
0.103164
0.182391
0.201243
0.0929484
0.172161
0.0873933
0.555263
0.393445
1.95844
2.33163
2.31192
1.72436
1.18568
0.97143
1.44797
2.09911
1.91687
2.01061
2.11444
1.6146
1.24808
1.36208
1.75301
1.54782
0.384277
0.426927
0.239686
3.62798
5.50052
4.31518
1.16224
0.521666
1.54003
1.85614
2.80674
2.68385
1.66206
1.15073
0.373382
0.287731
0.0763165
0.227981
0.0948855
0.178751
0.560155
0.507064
0.346614
0.195655
0.164335
0.224669
0.859431
0.258454
0.296994
0.564629
1.0015
0.214044
0.336057
1.00511
0.78087
0.197415
0.456926
0.905978
0.490947
0.744529
0.85531
1.65403
1.77252
0.710659
1.57282
0.81819
0.450354
0.63848
0.54111
0.702673
0.997965
3.39403
4.5771
0.965449
0.727138
1.08193
1.16054
3.41703
2.48176
3.94406
2.83904
4.30353
2.06453
1.75399
0.80416
0.315791
2.24946
4.72925
5.76178
6.73842
9.83569
8.94963
10.3738
10.6244
11.1452
10.0771
8.85633
8.79871
6.08598
4.41746
2.39205
1.19122
1.58765
0.900626
0.219
0.293942
0.34207
0.0896785
0.412955
0.607791
0.220906
1.59524
2.01768
1.00805
0.960257
1.52012
1.36354
0.873241
0.59271
0.27001
0.453109
0.308946
1.81498
0.27962
0.20069
1.19678
1.80421
1.51674
3.45726
3.78954
3.50827
0.999666
1.51599
1.22256
0.394465
0.210058
0.145365
0.660821
0.737233
0.165046
0.58672
0.611015
0.78962
1.46364
3.65123
3.81859
2.8874
3.06784
1.45708
2.02243
2.67505
2.80303
1.95977
0.448609
0.638452
0.177992
0.504712
2.68992
7.14587
8.22975
8.03963
7.24677
7.41206
7.01729
3.09649
2.20901
0.0723897
1.35444
0.227193
0.0496673
0.058882
0.10148
0.105224
0.147245
0.102316
0.0937572
0.780516
0.728307
0.0833244
3.19804
0.930591
4.46405
5.44576
1.67525
16.9096
3.22502
15.3563
2.28765
2.38563
28.1515
21.1302
3.70059
2.57532
3.04265
1.77383
1.12645
1.85255
2.93334
2.57124
5.22423
2.48753
0.695545
1.68089
4.0516
5.79694
1.96247
5.64416
2.72704
1.76758
0.381366
1.25884
6.23386
5.16525
5.76975
3.61585
4.7036
5.31769
2.05676
3.50262
3.47311
3.1315
5.40278
2.3196
3.03456
3.23609
2.87303
0.16595
1.42237
2.8746
4.95879
1.93999
1.45762
3.2739
2.0493
2.07111
2.0573
1.60729
2.58007
4.71737
0.158594
3.32512
1.9855
0.513615
0.0994468
4.33264
2.88551
1.00611
0.734652
0.79572
1.62132
3.15316
2.78872
2.48955
3.72019
2.61158
3.77705
1.50826
0.81323
4.08563
4.75967
5.46744
3.61836
3.95902
4.85889
3.0765
2.63842
2.94613
0.755469
1.48388
1.14967
14.3454
3.42513
0.435095
0.994778
0.707119
1.10702
0.223647
0.223903
0.588792
4.53361
1.92113
2.99443
4.96365
2.65322
5.30497
3.69875
3.28991
5.35235
2.39622
5.54738
3.27151
2.54797
3.97006
1.39788
1.57255
0.763343
0.667212
[truncated: 1,036 more rows]

## Sheet: Mouse 2_415 Signal
FrameCounter	Timestamp	LedState	Stimulation	Output0	Output1	Input0	Input1	Region0G
7426	1467.9	1	0	1	0	0	0	0.00909779
7428	1467.93	1	0	1	0	0	0	0.00908907
7430	1467.97	1	0	1	0	0	0	0.00908105
7432	1468	1	0	1	0	0	0	0.00906257
7434	1468.03	1	0	1	0	0	0	0.00909953
7436	1468.07	1	0	1	0	0	0	0.0090807
7438	1468.1	1	0	1	0	0	0	0.00911697
7440	1468.13	1	0	1	0	0	0	0.00911313
7442	1468.17	1	0	1	0	0	0	0.00907024
7444	1468.2	1	0	1	0	0	0	0.00910023
7446	1468.23	1	0	1	0	0	0	0.0090664
7448	1468.27	1	0	1	0	0	0	0.00906954
7450	1468.3	1	0	1	0	0	0	0.00906431
7452	1468.33	1	0	1	0	0	0	0.00905036
7454	1468.37	1	0	1	0	0	0	0.00907966
7456	1468.4	1	0	1	0	0	0	0.00909744
7458	1468.43	1	0	1	0	0	0	0.009095
7460	1468.47	1	0	1	0	0	0	0.00911487
7462	1468.5	1	0	1	0	0	0	0.00908523
7464	1468.53	1	0	1	0	0	0	0.00908
7466	1468.57	1	0	1	0	0	0	0.00912638
7468	1468.6	1	0	1	0	0	0	0.00907756
7470	1468.63	1	0	1	0	0	0	0.00912987
7472	1468.67	1	0	1	0	0	0	0.00914417
7474	1468.7	1	0	1	0	0	0	0.00909116
7476	1468.73	1	0	1	0	0	0	0.00911139
7478	1468.77	1	0	1	0	0	0	0.0091215
7480	1468.8	1	0	1	0	0	0	0.00913266
7482	1468.83	1	0	1	0	0	0	0.0091344
7484	1468.87	1	0	1	0	0	0	0.0091222
7486	1468.9	1	0	1	0	0	0	0.00915184
7488	1468.93	1	0	1	0	0	0	0.00912882
7490	1468.97	1	0	1	0	0	0	0.00917485
7492	1469	1	0	1	0	0	0	0.00915044
7494	1469.03	1	0	1	0	0	0	0.00912813
7496	1469.07	1	0	1	0	0	0	0.00911732
7498	1469.1	1	0	1	0	0	0	0.0091766
7500	1469.13	1	0	1	0	0	0	0.00916125
7502	1469.17	1	0	1	0	0	0	0.00909674
7504	1469.2	1	0	1	0	0	0	0.00914068
7506	1469.23	1	0	1	0	0	0	0.00912534
7508	1469.27	1	0	1	0	0	0	0.00911348
7510	1469.3	1	0	1	0	0	0	0.00914905
7512	1469.33	1	0	1	0	0	0	0.00912987
7514	1469.37	1	0	1	0	0	0	0.00911592
7516	1469.4	1	0	1	0	0	0	0.00916579
7518	1469.43	1	0	1	0	0	0	0.00915288
7520	1469.47	1	0	1	0	0	0	0.0091229
7522	1469.5	1	0	1	0	0	0	0.00907059
7524	1469.53	1	0	1	0	0	0	0.00911557
7526	1469.57	1	0	1	0	0	0	0.00910372
7528	1469.6	1	0	1	0	0	0	0.00913754
7530	1469.63	1	0	1	0	0	0	0.00911627
7532	1469.67	1	0	1	0	0	0	0.00911662
7534	1469.7	1	0	1	0	0	0	0.00911069
7536	1469.73	1	0	1	0	0	0	0.00909918
7538	1469.77	1	0	1	0	0	0	0.00909918
7540	1469.8	1	0	1	0	0	0	0.00911104
7542	1469.83	1	0	1	0	0	0	0.00910441
7544	1469.87	1	0	1	0	0	0	0.00908733
7546	1469.9	1	0	1	0	0	0	0.00909291
7548	1469.93	1	0	1	0	0	0	0.00911592
7550	1469.97	1	0	1	0	0	0	0.00914486
7552	1470	1	0	1	0	0	0	0.00915637
7554	1470.03	1	0	1	0	0	0	0.00912011
7556	1470.07	1	0	1	0	0	0	0.00910999
7558	1470.1	1	0	1	0	0	0	0.00911697
7560	1470.13	1	0	1	0	0	0	0.00910895
7562	1470.17	1	0	1	0	0	0	0.00913789
7564	1470.2	1	0	1	0	0	0	0.00913405
7566	1470.23	1	0	1	0	0	0	0.00914103
7568	1470.27	1	0	1	0	0	0	0.00908837
7570	1470.3	1	0	1	0	0	0	0.00910232
7572	1470.33	1	0	1	0	0	0	0.00909988
7574	1470.37	1	0	1	0	0	0	0.00907164
7576	1470.4	1	0	1	0	0	0	0.00911801
7578	1470.43	1	0	1	0	0	0	0.00914521
7580	1470.47	1	0	1	0	0	0	0.00913336
7582	1470.5	1	0	1	0	0	0	0.00911243
7584	1470.53	1	0	1	0	0	0	0.00908802
7586	1470.57	1	0	1	0	0	0	0.00911139
7588	1470.6	1	0	1	0	0	0	0.00906361
7590	1470.63	1	0	1	0	0	0	0.00908768
7592	1470.67	1	0	1	0	0	0	0.00910406
7594	1470.7	1	0	1	0	0	0	0.0091222
7596	1470.73	1	0	1	0	0	0	0.00910232
7598	1470.77	1	0	1	0	0	0	0.0090957
7600	1470.8	1	0	1	0	0	0	0.00907512
7602	1470.83	1	0	1	0	0	0	0.00907896
7604	1470.87	1	0	1	0	0	0	0.00910964
7606	1470.9	1	0	1	0	0	0	0.00909744
7608	1470.93	1	0	1	0	0	0	0.00906466
7610	1470.97	1	0	1	0	0	0	0.00908
7612	1471	1	0	1	0	0	0	0.00913405
7614	1471.03	1	0	1	0	0	0	0.00911487
7616	1471.07	1	0	1	0	0	0	0.00911069
7618	1471.1	1	0	1	0	0	0	0.00907408
7620	1471.13	1	0	1	0	0	0	0.00908977
7622	1471.17	1	0	1	0	0	0	0.0091079
7624	1471.2	1	0	1	0	0	0	0.00911348
7626	1471.23	1	0	1	0	0	0	0.00912534
7628	1471.27	1	0	1	0	0	0	0.00909883
7630	1471.3	1	0	1	0	0	0	0.00909709
7632	1471.33	1	0	1	0	0	0	0.00909849
7634	1471.37	1	0	1	0	0	0	0.00910372
7636	1471.4	1	0	1	0	0	0	0.00908245
7638	1471.43	1	0	1	0	0	0	0.0090542
7640	1471.47	1	0	1	0	0	0	0.00914765
7642	1471.5	1	0	1	0	0	0	0.00908035
7644	1471.53	1	0	1	0	0	0	0.00910232
7646	1471.57	1	0	1	0	0	0	0.00911278
7648	1471.6	1	0	1	0	0	0	0.00916788
7650	1471.63	1	0	1	0	0	0	0.00911871
7652	1471.67	1	0	1	0	0	0	0.00913928
7654	1471.7	1	0	1	0	0	0	0.00911209
7656	1471.73	1	0	1	0	0	0	0.00908802
7658	1471.77	1	0	1	0	0	0	0.00908837
7660	1471.8	1	0	1	0	0	0	0.00907198
7662	1471.83	1	0	1	0	0	0	0.00909221
7664	1471.87	1	0	1	0	0	0	0.00908279
7666	1471.9	1	0	1	0	0	0	0.00910441
7668	1471.93	1	0	1	0	0	0	0.00912359
7670	1471.97	1	0	1	0	0	0	0.009095
7672	1472	1	0	1	0	0	0	0.00913092
7674	1472.03	1	0	1	0	0	0	0.00911627
7676	1472.07	1	0	1	0	0	0	0.00907198
7678	1472.1	1	0	1	0	0	0	0.00907617
7680	1472.13	1	0	1	0	0	0	0.00906989
7682	1472.17	1	0	1	0	0	0	0.00906815
7684	1472.2	1	0	1	0	0	0	0.00914033
7686	1472.23	1	0	1	0	0	0	0.00909814
7688	1472.27	1	0	1	0	0	0	0.00913301
7690	1472.3	1	0	1	0	0	0	0.00911209
7692	1472.33	1	0	1	0	0	0	0.00914905
7694	1472.37	1	0	1	0	0	0	0.00913928
7696	1472.4	1	0	1	0	0	0	0.00911313
7698	1472.43	1	0	1	0	0	0	0.00914068
7700	1472.47	1	0	1	0	0	0	0.00910058
7702	1472.5	1	0	1	0	0	0	0.00911941
7704	1472.53	1	0	1	0	0	0	0.00912045
7706	1472.57	1	0	1	0	0	0	0.00914033
7708	1472.6	1	0	1	0	0	0	0.00907687
7710	1472.63	1	0	1	0	0	0	0.00909639
7712	1472.67	1	0	1	0	0	0	0.00915219
7714	1472.7	1	0	1	0	0	0	0.00907826
7716	1472.73	1	0	1	0	0	0	0.00912778
7718	1472.77	1	0	1	0	0	0	0.00905838
7720	1472.8	1	0	1	0	0	0	0.00912011
7722	1472.83	1	0	1	0	0	0	0.00912813
7724	1472.87	1	0	1	0	0	0	0.00912429
7726	1472.9	1	0	1	0	0	0	0.00910999
7728	1472.93	1	0	1	0	0	0	0.00913405
7730	1472.97	1	0	1	0	0	0	0.00914521
7732	1473	1	0	1	0	0	0	0.00910406
7734	1473.03	1	0	1	0	0	0	0.00909291
7736	1473.07	1	0	1	0	0	0	0.00903153
7738	1473.1	1	0	1	0	0	0	0.00907547
7740	1473.13	1	0	1	0	0	0	0.00907966
7742	1473.17	1	0	1	0	0	0	0.00907721
7744	1473.2	1	0	1	0	0	0	0.00906257
7746	1473.23	1	0	1	0	0	0	0.00906815
7748	1473.27	1	0	1	0	0	0	0.00909709
7750	1473.3	1	0	1	0	0	0	0.00906152
7752	1473.33	1	0	1	0	0	0	0.00906361
7754	1473.37	1	0	1	0	0	0	0.00908035
7756	1473.4	1	0	1	0	0	0	0.00904862
7758	1473.43	1	0	1	0	0	0	0.00907791
7760	1473.47	1	0	1	0	0	0	0.00911209
7762	1473.5	1	0	1	0	0	0	0.00905315
7764	1473.53	1	0	1	0	0	0	0.00911069
7766	1473.57	1	0	1	0	0	0	0.00909709
7768	1473.6	1	0	1	0	0	0	0.00906606
7770	1473.63	1	0	1	0	0	0	0.00910162
7772	1473.67	1	0	1	0	0	0	0.00910546
7774	1473.7	1	0	1	0	0	0	0.00905071
7776	1473.73	1	0	1	0	0	0	0.00908384
7778	1473.77	1	0	1	0	0	0	0.00910441
7780	1473.8	1	0	1	0	0	0	0.00906466
7782	1473.83	1	0	1	0	0	0	0.00905176
7784	1473.87	1	0	1	0	0	0	0.00906745
7786	1473.9	1	0	1	0	0	0	0.00910023
7788	1473.93	1	0	1	0	0	0	0.00907756
7790	1473.97	1	0	1	0	0	0	0.00906954
7792	1474	1	0	1	0	0	0	0.00909186
7794	1474.03	1	0	1	0	0	0	0.00907094
7796	1474.07	1	0	1	0	0	0	0.00909814
7798	1474.1	1	0	1	0	0	0	0.0090549
7800	1474.13	1	0	1	0	0	0	0.00906327
7802	1474.17	1	0	1	0	0	0	0.00906013
7804	1474.2	1	0	1	0	0	0	0.00908454
7806	1474.23	1	0	1	0	0	0	0.0090528
7808	1474.27	1	0	1	0	0	0	0.0090413
7810	1474.3	1	0	1	0	0	0	0.00905594
7812	1474.33	1	0	1	0	0	0	0.00906257
7814	1474.37	1	0	1	0	0	0	0.00909465
7816	1474.4	1	0	1	0	0	0	0.00905246
7818	1474.43	1	0	1	0	0	0	0.00910023
7820	1474.47	1	0	1	0	0	0	0.00908035
7822	1474.5	1	0	1	0	0	0	0.00911522
7824	1474.53	1	0	1	0	0	0	0.00910406
7826	1474.57	1	0	1	0	0	0	0.00905699
7828	1474.6	1	0	1	0	0	0	0.00906466
7830	1474.63	1	0	1	0	0	0	0.00903746
7832	1474.67	1	0	1	0	0	0	0.00908245
7834	1474.7	1	0	1	0	0	0	0.00903816
7836	1474.73	1	0	1	0	0	0	0.00910372
7838	1474.77	1	0	1	0	0	0	0.0090821
7840	1474.8	1	0	1	0	0	0	0.00908105
7842	1474.83	1	0	1	0	0	0	0.0090814
7844	1474.87	1	0	1	0	0	0	0.00906327
7846	1474.9	1	0	1	0	0	0	0.00907861
7848	1474.93	1	0	1	0	0	0	0.00908175
7850	1474.97	1	0	1	0	0	0	0.00903607
7852	1475	1	0	1	0	0	0	0.00906536
7854	1475.03	1	0	1	0	0	0	0.00904234
7856	1475.07	1	0	1	0	0	0	0.00906989
7858	1475.1	1	0	1	0	0	0	0.00908
7860	1475.13	1	0	1	0	0	0	0.00911836
7862	1475.17	1	0	1	0	0	0	0.0090807
7864	1475.2	1	0	1	0	0	0	0.00908245
7866	1475.23	1	0	1	0	0	0	0.00908279
7868	1475.27	1	0	1	0	0	0	0.00907547
7870	1475.3	1	0	1	0	0	0	0.00904688
7872	1475.33	1	0	1	0	0	0	0.00909988
7874	1475.37	1	0	1	0	0	0	0.009027
7876	1475.4	1	0	1	0	0	0	0.00906083
7878	1475.43	1	0	1	0	0	0	0.00903572
7880	1475.47	1	0	1	0	0	0	0.00906327
7882	1475.5	1	0	1	0	0	0	0.00903432
7884	1475.53	1	0	1	0	0	0	0.00903537
7886	1475.57	1	0	1	0	0	0	0.00906815
7888	1475.6	1	0	1	0	0	0	0.0090685
7890	1475.63	1	0	1	0	0	0	0.00907442
7892	1475.67	1	0	1	0	0	0	0.00902561
7894	1475.7	1	0	1	0	0	0	0.00903955
7896	1475.73	1	0	1	0	0	0	0.00904757
7898	1475.77	1	0	1	0	0	0	0.00907791
7900	1475.8	1	0	1	0	0	0	0.00906919
7902	1475.83	1	0	1	0	0	0	0.00904409
7904	1475.87	1	0	1	0	0	0	0.00906536
7906	1475.9	1	0	1	0	0	0	0.00902491
7908	1475.93	1	0	1	0	0	0	0.00904862
7910	1475.97	1	0	1	0	0	0	0.009027
7912	1476	1	0	1	0	0	0	0.00907059
7914	1476.03	1	0	1	0	0	0	0.00902561
7916	1476.07	1	0	1	0	0	0	0.00905734
7918	1476.1	1	0	1	0	0	0	0.00901759
7920	1476.13	1	0	1	0	0	0	0.00905978
7922	1476.17	1	0	1	0	0	0	0.00910372
7924	1476.2	1	0	1	0	0	0	0.0090148
7926	1476.23	1	0	1	0	0	0	0.00903711
7928	1476.27	1	0	1	0	0	0	0.00906745
7930	1476.3	1	0	1	0	0	0	0.0090542
7932	1476.33	1	0	1	0	0	0	0.00906501
7934	1476.37	1	0	1	0	0	0	0.00910476
7936	1476.4	1	0	1	0	0	0	0.00906048
7938	1476.43	1	0	1	0	0	0	0.00902979
7940	1476.47	1	0	1	0	0	0	0.00904862
7942	1476.5	1	0	1	0	0	0	0.00905455
7944	1476.53	1	0	1	0	0	0	0.00903886
7946	1476.57	1	0	1	0	0	0	0.00907268
7948	1476.6	1	0	1	0	0	0	0.00900957
7950	1476.63	1	0	1	0	0	0	0.00910197
7952	1476.67	1	0	1	0	0	0	0.00906954
7954	1476.7	1	0	1	0	0	0	0.00904688
7956	1476.73	1	0	1	0	0	0	0.00900922
7958	1476.77	1	0	1	0	0	0	0.00903153
7960	1476.8	1	0	1	0	0	0	0.00903851
7962	1476.83	1	0	1	0	0	0	0.00900433
7964	1476.87	1	0	1	0	0	0	0.00903746
7966	1476.9	1	0	1	0	0	0	0.00905734
7968	1476.93	1	0	1	0	0	0	0.00902456
7970	1476.97	1	0	1	0	0	0	0.00904827
7972	1477	1	0	1	0	0	0	0.00902247
7974	1477.03	1	0	1	0	0	0	0.00903746
7976	1477.07	1	0	1	0	0	0	0.0090005
7978	1477.1	1	0	1	0	0	0	0.0090664
7980	1477.13	1	0	1	0	0	0	0.00899631
7982	1477.17	1	0	1	0	0	0	0.00901201
7984	1477.2	1	0	1	0	0	0	0.00904374
7986	1477.23	1	0	1	0	0	0	0.00904897
7988	1477.27	1	0	1	0	0	0	0.00907268
7990	1477.3	1	0	1	0	0	0	0.00901793
7992	1477.33	1	0	1	0	0	0	0.00905769
7994	1477.37	1	0	1	0	0	0	0.00898829
7996	1477.4	1	0	1	0	0	0	0.00902909
7998	1477.43	1	0	1	0	0	0	0.00901305
8000	1477.47	1	0	1	0	0	0	0.00905594
8002	1477.5	1	0	1	0	0	0	0.00904095
8004	1477.53	1	0	1	0	0	0	0.00898829
8006	1477.57	1	0	1	0	0	0	0.00901898
8008	1477.6	1	0	1	0	0	0	0.00906327
8010	1477.63	1	0	1	0	0	0	0.00897644
8012	1477.67	1	0	1	0	0	0	0.00907059
8014	1477.7	1	0	1	0	0	0	0.00905106
8016	1477.73	1	0	1	0	0	0	0.00904653
8018	1477.77	1	0	1	0	0	0	0.00903607
8020	1477.8	1	0	1	0	0	0	0.0090535
8022	1477.83	1	0	1	0	0	0	0.00903502
8024	1477.87	1	0	1	0	0	0	0.00905664
8026	1477.9	1	0	1	0	0	0	0.00906675
8028	1477.93	1	0	1	0	0	0	0.00903537
8030	1477.97	1	0	1	0	0	0	0.00909012
8032	1478	1	0	1	0	0	0	0.00905525
8034	1478.03	1	0	1	0	0	0	0.00905943
8036	1478.07	1	0	1	0	0	0	0.00902038
8038	1478.1	1	0	1	0	0	0	0.00901898
8040	1478.13	1	0	1	0	0	0	0.0090141
8042	1478.17	1	0	1	0	0	0	0.0089869
8044	1478.2	1	0	1	0	0	0	0.00904409
8046	1478.23	1	0	1	0	0	0	0.00904967
8048	1478.27	1	0	1	0	0	0	0.00904827
8050	1478.3	1	0	1	0	0	0	0.00907268
8052	1478.33	1	0	1	0	0	0	0.0090406
8054	1478.37	1	0	1	0	0	0	0.0090549
8056	1478.4	1	0	1	0	0	0	0.00903816
8058	1478.43	1	0	1	0	0	0	0.00903851
8060	1478.47	1	0	1	0	0	0	0.0089991
8062	1478.5	1	0	1	0	0	0	0.00900294
8064	1478.53	1	0	1	0	0	0	0.00903467
8066	1478.57	1	0	1	0	0	0	0.00900643
8068	1478.6	1	0	1	0	0	0	0.00903258
8070	1478.63	1	0	1	0	0	0	0.00902491
8072	1478.67	1	0	1	0	0	0	0.00902595
8074	1478.7	1	0	1	0	0	0	0.00901166
8076	1478.73	1	0	1	0	0	0	0.00908977
8078	1478.77	1	0	1	0	0	0	0.00904548
8080	1478.8	1	0	1	0	0	0	0.00906466
8082	1478.83	1	0	1	0	0	0	0.00905211
8084	1478.87	1	0	1	0	0	0	0.00904967
8086	1478.9	1	0	1	0	0	0	0.00907477
8088	1478.93	1	0	1	0	0	0	0.00903258
8090	1478.97	1	0	1	0	0	0	0.0090936
8092	1479	1	0	1	0	0	0	0.00899213
8094	1479.03	1	0	1	0	0	0	0.00906989
8096	1479.07	1	0	1	0	0	0	0.00906152
8098	1479.1	1	0	1	0	0	0	0.00903955
8100	1479.13	1	0	1	0	0	0	0.00906536
8102	1479.17	1	0	1	0	0	0	0.00900643
8104	1479.2	1	0	1	0	0	0	0.00902874
8106	1479.23	1	0	1	0	0	0	0.00902735
8108	1479.27	1	0	1	0	0	0	0.00904304
8110	1479.3	1	0	1	0	0	0	0.00902003
8112	1479.33	1	0	1	0	0	0	0.00902805
8114	1479.37	1	0	1	0	0	0	0.00904792
8116	1479.4	1	0	1	0	0	0	0.00904339
8118	1479.43	1	0	1	0	0	0	0.00904723
8120	1479.47	1	0	1	0	0	0	0.00903502
8122	1479.5	1	0	1	0	0	0	0.00903921
8124	1479.53	1	0	1	0	0	0	0.00908837
8126	1479.57	1	0	1	0	0	0	0.00900643
8128	1479.6	1	0	1	0	0	0	0.0090549
8130	1479.63	1	0	1	0	0	0	0.00903258
8132	1479.67	1	0	1	0	0	0	0.00907268
8134	1479.7	1	0	1	0	0	0	0.009027
8136	1479.73	1	0	1	0	0	0	0.00903328
8138	1479.77	1	0	1	0	0	0	0.00906292
8140	1479.8	1	0	1	0	0	0	0.0090284
8142	1479.83	1	0	1	0	0	0	0.00904444
8144	1479.87	1	0	1	0	0	0	0.00905176
8146	1479.9	1	0	1	0	0	0	0.00906327
8148	1479.93	1	0	1	0	0	0	0.00906013
8150	1479.97	1	0	1	0	0	0	0.00902874
8152	1480	1	0	1	0	0	0	0.0090549
8154	1480.03	1	0	1	0	0	0	0.00904618
8156	1480.07	1	0	1	0	0	0	0.00905385
8158	1480.1	1	0	1	0	0	0	0.00905699
8160	1480.13	1	0	1	0	0	0	0.00905106
8162	1480.17	1	0	1	0	0	0	0.00905838
8164	1480.2	1	0	1	0	0	0	0.00900887
8166	1480.23	1	0	1	0	0	0	0.00901654
8168	1480.27	1	0	1	0	0	0	0.00901201
8170	1480.3	1	0	1	0	0	0	0.00901096
8172	1480.33	1	0	1	0	0	0	0.00902247
8174	1480.37	1	0	1	0	0	0	0.00898899
8176	1480.4	1	0	1	0	0	0	0.00900154
8178	1480.43	1	0	1	0	0	0	0.0090277
8180	1480.47	1	0	1	0	0	0	0.00905594
8182	1480.5	1	0	1	0	0	0	0.0090277
8184	1480.53	1	0	1	0	0	0	0.00906989
8186	1480.57	1	0	1	0	0	0	0.00905211
8188	1480.6	1	0	1	0	0	0	0.00903642
8190	1480.63	1	0	1	0	0	0	0.0090141
8192	1480.67	1	0	1	0	0	0	0.00903084
8194	1480.7	1	0	1	0	0	0	0.00903328
8196	1480.73	1	0	1	0	0	0	0.0090284
8198	1480.77	1	0	1	0	0	0	0.00904339
8200	1480.8	1	0	1	0	0	0	0.00903293
8202	1480.83	1	0	1	0	0	0	0.00907164
8204	1480.87	1	0	1	0	0	0	0.00902979
8206	1480.9	1	0	1	0	0	0	0.00906048
8208	1480.93	1	0	1	0	0	0	0.00902874
8210	1480.97	1	0	1	0	0	0	0.00903014
8212	1481	1	0	1	0	0	0	0.00904234
8214	1481.03	1	0	1	0	0	0	0.00901968
8216	1481.07	1	0	1	0	0	0	0.00899841
8218	1481.1	1	0	1	0	0	0	0.00903711
8220	1481.13	1	0	1	0	0	0	0.00904862
8222	1481.17	1	0	1	0	0	0	0.00906117
8224	1481.2	1	0	1	0	0	0	0.00899318
8226	1481.23	1	0	1	0	0	0	0.00899701
8228	1481.27	1	0	1	0	0	0	0.00904723
8230	1481.3	1	0	1	0	0	0	0.00900608
8232	1481.33	1	0	1	0	0	0	0.00903118
8234	1481.37	1	0	1	0	0	0	0.00900957
8236	1481.4	1	0	1	0	0	0	0.00906083
8238	1481.43	1	0	1	0	0	0	0.00900154
8240	1481.47	1	0	1	0	0	0	0.0090284
8242	1481.5	1	0	1	0	0	0	0.00902526
8244	1481.53	1	0	1	0	0	0	0.0090277
8246	1481.57	1	0	1	0	0	0	0.00901305
8248	1481.6	1	0	1	0	0	0	0.00896911
8250	1481.63	1	0	1	0	0	0	0.00903432
8252	1481.67	1	0	1	0	0	0	0.00899457
8254	1481.7	1	0	1	0	0	0	0.00899736
8256	1481.73	1	0	1	0	0	0	0.00901305
8258	1481.77	1	0	1	0	0	0	0.00900329
8260	1481.8	1	0	1	0	0	0	0.00901166
8262	1481.83	1	0	1	0	0	0	0.00903432
8264	1481.87	1	0	1	0	0	0	0.00900782
8266	1481.9	1	0	1	0	0	0	0.00898202
8268	1481.93	1	0	1	0	0	0	0.00896563
8270	1481.97	1	0	1	0	0	0	0.00904932
8272	1482	1	0	1	0	0	0	0.00899736
8274	1482.03	1	0	1	0	0	0	0.00899562
8276	1482.07	1	0	1	0	0	0	0.00898864
8278	1482.1	1	0	1	0	0	0	0.00899631
8280	1482.13	1	0	1	0	0	0	0.00897818
8282	1482.17	1	0	1	0	0	0	0.00900364
8284	1482.2	1	0	1	0	0	0	0.00902177
8286	1482.23	1	0	1	0	0	0	0.00899631
8288	1482.27	1	0	1	0	0	0	0.00901096
8290	1482.3	1	0	1	0	0	0	0.0090671
8292	1482.33	1	0	1	0	0	0	0.00899666
8294	1482.37	1	0	1	0	0	0	0.00897992
8296	1482.4	1	0	1	0	0	0	0.00900294
8298	1482.43	1	0	1	0	0	0	0.00901026
8300	1482.47	1	0	1	0	0	0	0.00899318
8302	1482.5	1	0	1	0	0	0	0.0089862
8304	1482.53	1	0	1	0	0	0	0.00899318
8306	1482.57	1	0	1	0	0	0	0.0089855
8308	1482.6	1	0	1	0	0	0	0.00895586
8310	1482.63	1	0	1	0	0	0	0.00900329
8312	1482.67	1	0	1	0	0	0	0.00898655
8314	1482.7	1	0	1	0	0	0	0.00893878
8316	1482.73	1	0	1	0	0	0	0.0090141
8318	1482.77	1	0	1	0	0	0	0.00893634
8320	1482.8	1	0	1	0	0	0	0.00900154
8322	1482.83	1	0	1	0	0	0	0.00900224
8324	1482.87	1	0	1	0	0	0	0.0089719
8326	1482.9	1	0	1	0	0	0	0.00897958
8328	1482.93	1	0	1	0	0	0	0.00895935
8330	1482.97	1	0	1	0	0	0	0.00893843
8332	1483	1	0	1	0	0	0	0.00893947
8334	1483.03	1	0	1	0	0	0	0.00895726
8336	1483.07	1	0	1	0	0	0	0.00893564
8338	1483.1	1	0	1	0	0	0	0.00891193
8340	1483.13	1	0	1	0	0	0	0.00897295
8342	1483.17	1	0	1	0	0	0	0.00889379
8344	1483.2	1	0	1	0	0	0	0.00892797
8346	1483.23	1	0	1	0	0	0	0.00892553
8348	1483.27	1	0	1	0	0	0	0.0089332
8350	1483.3	1	0	1	0	0	0	0.00894157
8352	1483.33	1	0	1	0	0	0	0.00892204
8354	1483.37	1	0	1	0	0	0	0.00888543
8356	1483.4	1	0	1	0	0	0	0.0089182
8358	1483.43	1	0	1	0	0	0	0.00894505
8360	1483.47	1	0	1	0	0	0	0.00893355
8362	1483.5	1	0	1	0	0	0	0.00893738
8364	1483.53	1	0	1	0	0	0	0.00893041
8366	1483.57	1	0	1	0	0	0	0.00892518
8368	1483.6	1	0	1	0	0	0	0.00897679
8370	1483.63	1	0	1	0	0	0	0.00895831
8372	1483.67	1	0	1	0	0	0	0.00896842
8374	1483.7	1	0	1	0	0	0	0.00896284
8376	1483.73	1	0	1	0	0	0	0.00897016
8378	1483.77	1	0	1	0	0	0	0.00899004
8380	1483.8	1	0	1	0	0	0	0.00893459
8382	1483.83	1	0	1	0	0	0	0.00900538
8384	1483.87	1	0	1	0	0	0	0.00897992
8386	1483.9	1	0	1	0	0	0	0.00894401
8388	1483.93	1	0	1	0	0	0	0.00898062
8390	1483.97	1	0	1	0	0	0	0.00895203
8392	1484	1	0	1	0	0	0	0.00904513
8394	1484.03	1	0	1	0	0	0	0.0090406
8396	1484.07	1	0	1	0	0	0	0.00901619
8398	1484.1	1	0	1	0	0	0	0.00903014
8400	1484.13	1	0	1	0	0	0	0.00901514
8402	1484.17	1	0	1	0	0	0	0.0089991
8404	1484.2	1	0	1	0	0	0	0.0089991
8406	1484.23	1	0	1	0	0	0	0.0090399
8408	1484.27	1	0	1	0	0	0	0.00905385
8410	1484.3	1	0	1	0	0	0	0.00906431
8412	1484.33	1	0	1	0	0	0	0.00900852
8414	1484.37	1	0	1	0	0	0	0.0090134
8416	1484.4	1	0	1	0	0	0	0.00899073
8418	1484.43	1	0	1	0	0	0	0.00904548
8420	1484.47	1	0	1	0	0	0	0.00903642
8422	1484.5	1	0	1	0	0	0	0.00904304
8424	1484.53	1	0	1	0	0	0	0.00900817
8426	1484.57	1	0	1	0	0	0	0.00902735
8428	1484.6	1	0	1	0	0	0	0.00902177
8430	1484.63	1	0	1	0	0	0	0.00907373
8432	1484.67	1	0	1	0	0	0	0.00904478
8434	1484.7	1	0	1	0	0	0	0.00904583
8436	1484.73	1	0	1	0	0	0	0.00902212
8438	1484.77	1	0	1	0	0	0	0.00902072
8440	1484.8	1	0	1	0	0	0	0.00902177
8442	1484.83	1	0	1	0	0	0	0.00901445
8444	1484.87	1	0	1	0	0	0	0.00904723
8446	1484.9	1	0	1	0	0	0	0.00899876
8448	1484.93	1	0	1	0	0	0	0.00903084
8450	1484.97	1	0	1	0	0	0	0.00899178
8452	1485	1	0	1	0	0	0	0.00905211
8454	1485.03	1	0	1	0	0	0	0.00897225
8456	1485.07	1	0	1	0	0	0	0.00900364
8458	1485.1	1	0	1	0	0	0	0.00900991
8460	1485.13	1	0	1	0	0	0	0.00901375
8462	1485.17	1	0	1	0	0	0	0.00899701
8464	1485.2	1	0	1	0	0	0	0.0090141
8466	1485.23	1	0	1	0	0	0	0.00901166
8468	1485.27	1	0	1	0	0	0	0.00897051
8470	1485.3	1	0	1	0	0	0	0.00897748
8472	1485.33	1	0	1	0	0	0	0.00899876
8474	1485.37	1	0	1	0	0	0	0.00898655
8476	1485.4	1	0	1	0	0	0	0.0090012
8478	1485.43	1	0	1	0	0	0	0.00899945
8480	1485.47	1	0	1	0	0	0	0.00899631
8482	1485.5	1	0	1	0	0	0	0.00900364
8484	1485.53	1	0	1	0	0	0	0.00901061
8486	1485.57	1	0	1	0	0	0	0.00905036
8488	1485.6	1	0	1	0	0	0	0.00897051
8490	1485.63	1	0	1	0	0	0	0.00902491
8492	1485.67	1	0	1	0	0	0	0.00896807
8494	1485.7	1	0	1	0	0	0	0.00899004
8496	1485.73	1	0	1	0	0	0	0.00900887
8498	1485.77	1	0	1	0	0	0	0.00902909
8500	1485.8	1	0	1	0	0	0	0.00901549
8502	1485.83	1	0	1	0	0	0	0.00901724
8504	1485.87	1	0	1	0	0	0	0.00900364
8506	1485.9	1	0	1	0	0	0	0.00902282
8508	1485.93	1	0	1	0	0	0	0.00902386
8510	1485.97	1	0	1	0	0	0	0.00897121
8512	1486	1	0	1	0	0	0	0.00901584
8514	1486.03	1	0	1	0	0	0	0.00899736
8516	1486.07	1	0	1	0	0	0	0.00903572
8518	1486.1	1	0	1	0	0	0	0.00903223
8520	1486.13	1	0	1	0	0	0	0.00902595
8522	1486.17	1	0	1	0	0	0	0.00904757
8524	1486.2	1	0	1	0	0	0	0.0090263
8526	1486.23	1	0	1	0	0	0	0.0090678
8528	1486.27	1	0	1	0	0	0	0.00898306
8530	1486.3	1	0	1	0	0	0	0.00903467
8532	1486.33	1	0	1	0	0	0	0.00907861
8534	1486.37	1	0	1	0	0	0	0.00905559
8536	1486.4	1	0	1	0	0	0	0.00904827
8538	1486.43	1	0	1	0	0	0	0.00899283
8540	1486.47	1	0	1	0	0	0	0.00902491
8542	1486.5	1	0	1	0	0	0	0.00904653
8544	1486.53	1	0	1	0	0	0	0.00903188
8546	1486.57	1	0	1	0	0	0	0.00902177
8548	1486.6	1	0	1	0	0	0	0.0090141
8550	1486.63	1	0	1	0	0	0	0.00905002
8552	1486.67	1	0	1	0	0	0	0.00901166
8554	1486.7	1	0	1	0	0	0	0.00902561
8556	1486.73	1	0	1	0	0	0	0.00905176
8558	1486.77	1	0	1	0	0	0	0.00900782
8560	1486.8	1	0	1	0	0	0	0.00899352
8562	1486.83	1	0	1	0	0	0	0.00898725
8564	1486.87	1	0	1	0	0	0	0.00903014
8566	1486.9	1	0	1	0	0	0	0.00898411
8568	1486.93	1	0	1	0	0	0	0.00902282
8570	1486.97	1	0	1	0	0	0	0.00899666
8572	1487	1	0	1	0	0	0	0.00902456
8574	1487.03	1	0	1	0	0	0	0.00898306
8576	1487.07	1	0	1	0	0	0	0.00899806
8578	1487.1	1	0	1	0	0	0	0.00902177
8580	1487.13	1	0	1	0	0	0	0.00903363
8582	1487.17	1	0	1	0	0	0	0.00899701
8584	1487.2	1	0	1	0	0	0	0.00901061
8586	1487.23	1	0	1	0	0	0	0.00898516
8588	1487.27	1	0	1	0	0	0	0.00903223
8590	1487.3	1	0	1	0	0	0	0.00900887
8592	1487.33	1	0	1	0	0	0	0.00899806
8594	1487.37	1	0	1	0	0	0	0.00897853
8596	1487.4	1	0	1	0	0	0	0.0089597
8598	1487.43	1	0	1	0	0	0	0.00899631
8600	1487.47	1	0	1	0	0	0	0.0089733
8602	1487.5	1	0	1	0	0	0	0.00893041
8604	1487.53	1	0	1	0	0	0	0.0089475
8606	1487.57	1	0	1	0	0	0	0.00900991
8608	1487.6	1	0	1	0	0	0	0.00895796
8610	1487.63	1	0	1	0	0	0	0.00895831
8612	1487.67	1	0	1	0	0	0	0.00899597
8614	1487.7	1	0	1	0	0	0	0.00899701
8616	1487.73	1	0	1	0	0	0	0.00900189
8618	1487.77	1	0	1	0	0	0	0.00902212
8620	1487.8	1	0	1	0	0	0	0.00899876
8622	1487.83	1	0	1	0	0	0	0.00900015
8624	1487.87	1	0	1	0	0	0	0.00899108
8626	1487.9	1	0	1	0	0	0	0.00900643
8628	1487.93	1	0	1	0	0	0	0.00900468
8630	1487.97	1	0	1	0	0	0	0.00903816
8632	1488	1	0	1	0	0	0	0.00900712
8634	1488.03	1	0	1	0	0	0	0.00897714
8636	1488.07	1	0	1	0	0	0	0.00899736
8638	1488.1	1	0	1	0	0	0	0.00902351
8640	1488.13	1	0	1	0	0	0	0.00904723
8642	1488.17	1	0	1	0	0	0	0.00901131
8644	1488.2	1	0	1	0	0	0	0.00897504
8646	1488.23	1	0	1	0	0	0	0.00899178
8648	1488.27	1	0	1	0	0	0	0.00901131
8650	1488.3	1	0	1	0	0	0	0.0090148
8652	1488.33	1	0	1	0	0	0	0.00898341
8654	1488.37	1	0	1	0	0	0	0.00900294
8656	1488.4	1	0	1	0	0	0	0.00902038
8658	1488.43	1	0	1	0	0	0	0.00897714
8660	1488.47	1	0	1	0	0	0	0.00896772
8662	1488.5	1	0	1	0	0	0	0.00902944
8664	1488.53	1	0	1	0	0	0	0.00897365
8666	1488.57	1	0	1	0	0	0	0.00901375
8668	1488.6	1	0	1	0	0	0	0.00897783
8670	1488.63	1	0	1	0	0	0	0.00901235
8672	1488.67	1	0	1	0	0	0	0.00905873
8674	1488.7	1	0	1	0	0	0	0.00900678
8676	1488.73	1	0	1	0	0	0	0.00900294
8678	1488.77	1	0	1	0	0	0	0.00900957
8680	1488.8	1	0	1	0	0	0	0.00900538
8682	1488.83	1	0	1	0	0	0	0.00898411
8684	1488.87	1	0	1	0	0	0	0.00900817
8686	1488.9	1	0	1	0	0	0	0.00901445
8688	1488.93	1	0	1	0	0	0	0.00899736
8690	1488.97	1	0	1	0	0	0	0.00898237
8692	1489	1	0	1	0	0	0	0.00899527
8694	1489.03	1	0	1	0	0	0	0.00895412
8696	1489.07	1	0	1	0	0	0	0.00896563
8698	1489.1	1	0	1	0	0	0	0.00898481
8700	1489.13	1	0	1	0	0	0	0.00904583
8702	1489.17	1	0	1	0	0	0	0.00898376
8704	1489.2	1	0	1	0	0	0	0.00902142
8706	1489.23	1	0	1	0	0	0	0.00900224
8708	1489.27	1	0	1	0	0	0	0.0090012
8710	1489.3	1	0	1	0	0	0	0.00902595
8712	1489.33	1	0	1	0	0	0	0.00899004
8714	1489.37	1	0	1	0	0	0	0.00899213
8716	1489.4	1	0	1	0	0	0	0.00893913
8718	1489.43	1	0	1	0	0	0	0.00895586
8720	1489.47	1	0	1	0	0	0	0.00895342
8722	1489.5	1	0	1	0	0	0	0.0089991
8724	1489.53	1	0	1	0	0	0	0.00898795
8726	1489.57	1	0	1	0	0	0	0.00895342
8728	1489.6	1	0	1	0	0	0	0.00897051
8730	1489.63	1	0	1	0	0	0	0.00894436
8732	1489.67	1	0	1	0	0	0	0.00900538
8734	1489.7	1	0	1	0	0	0	0.00898376
8736	1489.73	1	0	1	0	0	0	0.00895656
8738	1489.77	1	0	1	0	0	0	0.00898202
8740	1489.8	1	0	1	0	0	0	0.00901584
8742	1489.83	1	0	1	0	0	0	0.00901375
8744	1489.87	1	0	1	0	0	0	0.00905594
8746	1489.9	1	0	1	0	0	0	0.00901689
8748	1489.93	1	0	1	0	0	0	0.00898655
8750	1489.97	1	0	1	0	0	0	0.00901166
8752	1490	1	0	1	0	0	0	0.00900329
8754	1490.03	1	0	1	0	0	0	0.00899004
8756	1490.07	1	0	1	0	0	0	0.00902212
8758	1490.1	1	0	1	0	0	0	0.00900259
8760	1490.13	1	0	1	0	0	0	0.00900224
8762	1490.17	1	0	1	0	0	0	0.00904165
8764	1490.2	1	0	1	0	0	0	0.00903084
8766	1490.23	1	0	1	0	0	0	0.0089991
8768	1490.27	1	0	1	0	0	0	0.00899945
8770	1490.3	1	0	1	0	0	0	0.00899876
8772	1490.33	1	0	1	0	0	0	0.00900922
8774	1490.37	1	0	1	0	0	0	0.0090263
8776	1490.4	1	0	1	0	0	0	0.00902456
8778	1490.43	1	0	1	0	0	0	0.00898202
8780	1490.47	1	0	1	0	0	0	0.00900189
8782	1490.5	1	0	1	0	0	0	0.00897609
8784	1490.53	1	0	1	0	0	0	0.00897679
8786	1490.57	1	0	1	0	0	0	0.00896981
8788	1490.6	1	0	1	0	0	0	0.00899527
8790	1490.63	1	0	1	0	0	0	0.00897016
8792	1490.67	1	0	1	0	0	0	0.0090263
8794	1490.7	1	0	1	0	0	0	0.00901235
8796	1490.73	1	0	1	0	0	0	0.00899073
8798	1490.77	1	0	1	0	0	0	0.0090127
8800	1490.8	1	0	1	0	0	0	0.00903153
8802	1490.83	1	0	1	0	0	0	0.00898271
8804	1490.87	1	0	1	0	0	0	0.00900015
8806	1490.9	1	0	1	0	0	0	0.00903537
8808	1490.93	1	0	1	0	0	0	0.00900433
8810	1490.97	1	0	1	0	0	0	0.00900015
8812	1491	1	0	1	0	0	0	0.00901166
8814	1491.03	1	0	1	0	0	0	0.00900852
8816	1491.07	1	0	1	0	0	0	0.00901375
8818	1491.1	1	0	1	0	0	0	0.00901898
8820	1491.13	1	0	1	0	0	0	0.00899213
8822	1491.17	1	0	1	0	0	0	0.00901793
8824	1491.2	1	0	1	0	0	0	0.0089998
8826	1491.23	1	0	1	0	0	0	0.00899248
8828	1491.27	1	0	1	0	0	0	0.00897853
8830	1491.3	1	0	1	0	0	0	0.009027
8832	1491.33	1	0	1	0	0	0	0.00901096
8834	1491.37	1	0	1	0	0	0	0.00902805
8836	1491.4	1	0	1	0	0	0	0.00899318
8838	1491.43	1	0	1	0	0	0	0.0089855
8840	1491.47	1	0	1	0	0	0	0.0090012
8842	1491.5	1	0	1	0	0	0	0.00902177
8844	1491.53	1	0	1	0	0	0	0.00898934
8846	1491.57	1	0	1	0	0	0	0.00901026
8848	1491.6	1	0	1	0	0	0	0.00900643
8850	1491.63	1	0	1	0	0	0	0.0090406
8852	1491.67	1	0	1	0	0	0	0.00897435
8854	1491.7	1	0	1	0	0	0	0.00902003
8856	1491.73	1	0	1	0	0	0	0.00896877
8858	1491.77	1	0	1	0	0	0	0.00902944
8860	1491.8	1	0	1	0	0	0	0.00902142
8862	1491.83	1	0	1	0	0	0	0.00901201
8864	1491.86	1	0	1	0	0	0	0.00900468
8866	1491.9	1	0	1	0	0	0	0.00899352
8868	1491.93	1	0	1	0	0	0	0.00899631
8870	1491.96	1	0	1	0	0	0	0.00894575
8872	1492	1	0	1	0	0	0	0.00903049
8874	1492.03	1	0	1	0	0	0	0.00902561
8876	1492.06	1	0	1	0	0	0	0.00897714
8878	1492.1	1	0	1	0	0	0	0.00900329
8880	1492.13	1	0	1	0	0	0	0.00900364
8882	1492.16	1	0	1	0	0	0	0.00904897
8884	1492.2	1	0	1	0	0	0	0.00902421
8886	1492.23	1	0	1	0	0	0	0.00904513
8888	1492.26	1	0	1	0	0	0	0.00902561
8890	1492.3	1	0	1	0	0	0	0.00904932
8892	1492.33	1	0	1	0	0	0	0.00902177
8894	1492.36	1	0	1	0	0	0	0.00902979
8896	1492.4	1	0	1	0	0	0	0.00898864
8898	1492.43	1	0	1	0	0	0	0.00900678
8900	1492.46	1	0	1	0	0	0	0.00901968
8902	1492.5	1	0	1	0	0	0	0.00905176
8904	1492.53	1	0	1	0	0	0	0.00903781
8906	1492.56	1	0	1	0	0	0	0.00900224
8908	1492.6	1	0	1	0	0	0	0.00902735
8910	1492.63	1	0	1	0	0	0	0.00901759
8912	1492.66	1	0	1	0	0	0	0.00898829
8914	1492.7	1	0	1	0	0	0	0.0090148
8916	1492.73	1	0	1	0	0	0	0.00899597
8918	1492.76	1	0	1	0	0	0	0.00902038
8920	1492.8	1	0	1	0	0	0	0.00901898
8922	1492.83	1	0	1	0	0	0	0.00902979
8924	1492.86	1	0	1	0	0	0	0.00896528
8926	1492.9	1	0	1	0	0	0	0.00896946
8928	1492.93	1	0	1	0	0	0	0.0089998
8930	1492.96	1	0	1	0	0	0	0.00903293
8932	1493	1	0	1	0	0	0	0.00897679
8934	1493.03	1	0	1	0	0	0	0.00898376
8936	1493.06	1	0	1	0	0	0	0.00898376
8938	1493.1	1	0	1	0	0	0	0.00901445
8940	1493.13	1	0	1	0	0	0	0.00898899
8942	1493.16	1	0	1	0	0	0	0.00897644
8944	1493.2	1	0	1	0	0	0	0.00897714
8946	1493.23	1	0	1	0	0	0	0.0089719
8948	1493.26	1	0	1	0	0	0	0.00900922
8950	1493.3	1	0	1	0	0	0	0.00900399
8952	1493.33	1	0	1	0	0	0	0.00901514
8954	1493.36	1	0	1	0	0	0	0.00898271
8956	1493.4	1	0	1	0	0	0	0.00898795
8958	1493.43	1	0	1	0	0	0	0.00896877
8960	1493.46	1	0	1	0	0	0	0.00896458
8962	1493.5	1	0	1	0	0	0	0.00900991
8964	1493.53	1	0	1	0	0	0	0.00900154
8966	1493.56	1	0	1	0	0	0	0.00895377
8968	1493.6	1	0	1	0	0	0	0.00892936
8970	1493.63	1	0	1	0	0	0	0.00893076
8972	1493.66	1	0	1	0	0	0	0.00894994
8974	1493.7	1	0	1	0	0	0	0.00900573
8976	1493.73	1	0	1	0	0	0	0.0089869
8978	1493.76	1	0	1	0	0	0	0.0089726
8980	1493.8	1	0	1	0	0	0	0.00894784
8982	1493.83	1	0	1	0	0	0	0.00897923
8984	1493.86	1	0	1	0	0	0	0.00898237
8986	1493.9	1	0	1	0	0	0	0.00900259
8988	1493.93	1	0	1	0	0	0	0.00896249
8990	1493.96	1	0	1	0	0	0	0.00898237
8992	1494	1	0	1	0	0	0	0.00896388
8994	1494.03	1	0	1	0	0	0	0.00898271
8996	1494.06	1	0	1	0	0	0	0.00898271
8998	1494.1	1	0	1	0	0	0	0.00897609
9000	1494.13	1	0	1	0	0	0	0.00898132
9002	1494.16	1	0	1	0	0	0	0.00899597
9004	1494.2	1	0	1	0	0	0	0.00899771
9006	1494.23	1	0	1	0	0	0	0.00897574
9008	1494.26	1	0	1	0	0	0	0.00900259
9010	1494.3	1	0	1	0	0	0	0.00897086
9012	1494.33	1	0	1	0	0	0	0.00896737
9014	1494.36	1	0	1	0	0	0	0.00898795
9016	1494.4	1	0	1	0	0	0	0.00898376
9018	1494.43	1	0	1	0	0	0	0.0090148
9020	1494.46	1	0	1	0	0	0	0.00901131
9022	1494.5	1	0	1	0	0	0	0.00898097
9024	1494.53	1	0	1	0	0	0	0.00901793
9026	1494.56	1	0	1	0	0	0	0.00899422
9028	1494.6	1	0	1	0	0	0	0.00896249
9030	1494.63	1	0	1	0	0	0	0.00900852
9032	1494.66	1	0	1	0	0	0	0.00897679
9034	1494.7	1	0	1	0	0	0	0.0090141
9036	1494.73	1	0	1	0	0	0	0.00900189
9038	1494.76	1	0	1	0	0	0	0.00903502
9040	1494.8	1	0	1	0	0	0	0.00901235
9042	1494.83	1	0	1	0	0	0	0.00901619
9044	1494.86	1	0	1	0	0	0	0.00899457
9046	1494.9	1	0	1	0	0	0	0.00899701
9048	1494.93	1	0	1	0	0	0	0.0090005
9050	1494.96	1	0	1	0	0	0	0.00897783
9052	1495	1	0	1	0	0	0	0.00899283
9054	1495.03	1	0	1	0	0	0	0.00897783
9056	1495.06	1	0	1	0	0	0	0.00897504
9058	1495.1	1	0	1	0	0	0	0.00898829
9060	1495.13	1	0	1	0	0	0	0.00895377
9062	1495.16	1	0	1	0	0	0	0.00896423
9064	1495.2	1	0	1	0	0	0	0.00899073
9066	1495.23	1	0	1	0	0	0	0.00894471
9068	1495.26	1	0	1	0	0	0	0.00894784
9070	1495.3	1	0	1	0	0	0	0.00894296
9072	1495.33	1	0	1	0	0	0	0.00896354
9074	1495.36	1	0	1	0	0	0	0.00891716
9076	1495.4	1	0	1	0	0	0	0.0089332
9078	1495.43	1	0	1	0	0	0	0.00893634
9080	1495.46	1	0	1	0	0	0	0.00894226
9082	1495.5	1	0	1	0	0	0	0.00898516
9084	1495.53	1	0	1	0	0	0	0.00891193
9086	1495.56	1	0	1	0	0	0	0.00896563
9088	1495.6	1	0	1	0	0	0	0.00891193
9090	1495.63	1	0	1	0	0	0	0.00892797
9092	1495.66	1	0	1	0	0	0	0.00897051
9094	1495.7	1	0	1	0	0	0	0.0089604
9096	1495.73	1	0	1	0	0	0	0.00892169
9098	1495.76	1	0	1	0	0	0	0.00894959
9100	1495.8	1	0	1	0	0	0	0.00893947
9102	1495.83	1	0	1	0	0	0	0.00892378
9104	1495.86	1	0	1	0	0	0	0.00891193
9106	1495.9	1	0	1	0	0	0	0.0089339
9108	1495.93	1	0	1	0	0	0	0.00890949
9110	1495.96	1	0	1	0	0	0	0.00889449
9112	1496	1	0	1	0	0	0	0.00892378
9114	1496.03	1	0	1	0	0	0	0.00895168
9116	1496.06	1	0	1	0	0	0	0.00890809
9118	1496.1	1	0	1	0	0	0	0.00888333
9120	1496.13	1	0	1	0	0	0	0.00892657
9122	1496.16	1	0	1	0	0	0	0.00891053
9124	1496.2	1	0	1	0	0	0	0.00893773
9126	1496.23	1	0	1	0	0	0	0.00890181
9128	1496.26	1	0	1	0	0	0	0.00892832
9130	1496.3	1	0	1	0	0	0	0.00894471
9132	1496.33	1	0	1	0	0	0	0.00892239
9134	1496.36	1	0	1	0	0	0	0.00890809
9136	1496.4	1	0	1	0	0	0	0.00890635
9138	1496.43	1	0	1	0	0	0	0.0088931
9140	1496.46	1	0	1	0	0	0	0.00893006
9142	1496.5	1	0	1	0	0	0	0.0089719
9144	1496.53	1	0	1	0	0	0	0.00892553
9146	1496.56	1	0	1	0	0	0	0.00892064
9148	1496.6	1	0	1	0	0	0	0.0089475
9150	1496.63	1	0	1	0	0	0	0.00891018
9152	1496.66	1	0	1	0	0	0	0.00894784
9154	1496.7	1	0	1	0	0	0	0.00893006
9156	1496.73	1	0	1	0	0	0	0.00893006
9158	1496.76	1	0	1	0	0	0	0.00892204
9160	1496.8	1	0	1	0	0	0	0.00897225
9162	1496.83	1	0	1	0	0	0	0.00897539
9164	1496.86	1	0	1	0	0	0	0.00896493
9166	1496.9	1	0	1	0	0	0	0.00894157
9168	1496.93	1	0	1	0	0	0	0.00896667
9170	1496.96	1	0	1	0	0	0	0.0089862
9172	1497	1	0	1	0	0	0	0.00896598
9174	1497.03	1	0	1	0	0	0	0.00896458
9176	1497.06	1	0	1	0	0	0	0.00898027
9178	1497.1	1	0	1	0	0	0	0.00896214
9180	1497.13	1	0	1	0	0	0	0.00894052
9182	1497.16	1	0	1	0	0	0	0.0089339
9184	1497.2	1	0	1	0	0	0	0.00893599
9186	1497.23	1	0	1	0	0	0	0.00892762
9188	1497.26	1	0	1	0	0	0	0.00894994
9190	1497.3	1	0	1	0	0	0	0.00893738
9192	1497.33	1	0	1	0	0	0	0.00889624
9194	1497.36	1	0	1	0	0	0	0.00895168
9196	1497.4	1	0	1	0	0	0	0.0089726
9198	1497.43	1	0	1	0	0	0	0.00890181
9200	1497.46	1	0	1	0	0	0	0.00890774
9202	1497.5	1	0	1	0	0	0	0.00893285
9204	1497.53	1	0	1	0	0	0	0.0089053
9206	1497.56	1	0	1	0	0	0	0.00888717
9208	1497.6	1	0	1	0	0	0	0.00892343
9210	1497.63	1	0	1	0	0	0	0.00891751
9212	1497.66	1	0	1	0	0	0	0.00894505
9214	1497.7	1	0	1	0	0	0	0.00892971
9216	1497.73	1	0	1	0	0	0	0.00896144
9218	1497.76	1	0	1	0	0	0	0.00897818
9220	1497.8	1	0	1	0	0	0	0.00892134
9222	1497.83	1	0	1	0	0	0	0.00898271
9224	1497.86	1	0	1	0	0	0	0.00890042
9226	1497.9	1	0	1	0	0	0	0.00890914
9228	1497.93	1	0	1	0	0	0	0.00890949
9230	1497.96	1	0	1	0	0	0	0.00892692
9232	1498	1	0	1	0	0	0	0.00894296
9234	1498.03	1	0	1	0	0	0	0.00894471
9236	1498.06	1	0	1	0	0	0	0.00892169
9238	1498.1	1	0	1	0	0	0	0.00890321
9240	1498.13	1	0	1	0	0	0	0.00890181
9242	1498.16	1	0	1	0	0	0	0.00888264
9244	1498.2	1	0	1	0	0	0	0.00891367
9246	1498.23	1	0	1	0	0	0	0.00888647
9248	1498.26	1	0	1	0	0	0	0.00892692
9250	1498.3	1	0	1	0	0	0	0.00892553
9252	1498.33	1	0	1	0	0	0	0.00888926
9254	1498.36	1	0	1	0	0	0	0.00897156
9256	1498.4	1	0	1	0	0	0	0.00894017
9258	1498.43	1	0	1	0	0	0	0.00893634
9260	1498.46	1	0	1	0	0	0	0.00897923
9262	1498.5	1	0	1	0	0	0	0.00894959
9264	1498.53	1	0	1	0	0	0	0.00898446
9266	1498.56	1	0	1	0	0	0	0.00895307
9268	1498.6	1	0	1	0	0	0	0.00896388
9270	1498.63	1	0	1	0	0	0	0.00891332
9272	1498.66	1	0	1	0	0	0	0.00893215
9274	1498.7	1	0	1	0	0	0	0.00888891
9276	1498.73	1	0	1	0	0	0	0.00892901
9278	1498.76	1	0	1	0	0	0	0.00896667
9280	1498.8	1	0	1	0	0	0	0.008891
9282	1498.83	1	0	1	0	0	0	0.00894192
9284	1498.86	1	0	1	0	0	0	0.00893703
9286	1498.9	1	0	1	0	0	0	0.00890983
9288	1498.93	1	0	1	0	0	0	0.00891158
9290	1498.96	1	0	1	0	0	0	0.00890495
9292	1499	1	0	1	0	0	0	0.00894959
9294	1499.03	1	0	1	0	0	0	0.00891681
9296	1499.06	1	0	1	0	0	0	0.00895307
9298	1499.1	1	0	1	0	0	0	0.00896911
9300	1499.13	1	0	1	0	0	0	0.00892483
9302	1499.16	1	0	1	0	0	0	0.00895656
9304	1499.2	1	0	1	0	0	0	0.0089604
9306	1499.23	1	0	1	0	0	0	0.00899352
9308	1499.26	1	0	1	0	0	0	0.0089318
9310	1499.3	1	0	1	0	0	0	0.0089869
9312	1499.33	1	0	1	0	0	0	0.00893215
9314	1499.36	1	0	1	0	0	0	0.00891681
9316	1499.4	1	0	1	0	0	0	0.00898237
9318	1499.43	1	0	1	0	0	0	0.00894122
9320	1499.46	1	0	1	0	0	0	0.00895203
9322	1499.5	1	0	1	0	0	0	0.00893773
9324	1499.53	1	0	1	0	0	0	0.0089862
9326	1499.56	1	0	1	0	0	0	0.00898585
9328	1499.6	1	0	1	0	0	0	0.00892588
9330	1499.63	1	0	1	0	0	0	0.00899178
9332	1499.66	1	0	1	0	0	0	0.00894331
9334	1499.7	1	0	1	0	0	0	0.00896179
9336	1499.73	1	0	1	0	0	0	0.00898341
9338	1499.76	1	0	1	0	0	0	0.00898097
9340	1499.8	1	0	1	0	0	0	0.00899143
9342	1499.83	1	0	1	0	0	0	0.0089733
9344	1499.86	1	0	1	0	0	0	0.00894471
9346	1499.9	1	0	1	0	0	0	0.00895238
9348	1499.93	1	0	1	0	0	0	0.00900643
9350	1499.96	1	0	1	0	0	0	0.00897923
9352	1500	1	0	1	0	0	0	0.00894296
9354	1500.03	1	0	1	0	0	0	0.00898097
9356	1500.06	1	0	1	0	0	0	0.0089991
9358	1500.1	1	0	1	0	0	0	0.00904095
9360	1500.13	1	0	1	0	0	0	0.00896807
9362	1500.16	1	0	1	0	0	0	0.00894401
9364	1500.2	1	0	1	0	0	0	0.00899318
9366	1500.23	1	0	1	0	0	0	0.00888926
9368	1500.26	1	0	1	0	0	0	0.008974
9370	1500.3	1	0	1	0	0	0	0.00893111
9372	1500.33	1	0	1	0	0	0	0.00893494
9374	1500.36	1	0	1	0	0	0	0.00894959
9376	1500.4	1	0	1	0	0	0	0.00897469
9378	1500.43	1	0	1	0	0	0	0.00894819
9380	1500.46	1	0	1	0	0	0	0.00894924
9382	1500.5	1	0	1	0	0	0	0.00894087
9384	1500.53	1	0	1	0	0	0	0.00892727
9386	1500.56	1	0	1	0	0	0	0.00895482
9388	1500.6	1	0	1	0	0	0	0.00893773
9390	1500.63	1	0	1	0	0	0	0.00894575
9392	1500.66	1	0	1	0	0	0	0.00893145
9394	1500.7	1	0	1	0	0	0	0.00897958
9396	1500.73	1	0	1	0	0	0	0.00895621
9398	1500.76	1	0	1	0	0	0	0.00897818
9400	1500.8	1	0	1	0	0	0	0.00897783
9402	1500.83	1	0	1	0	0	0	0.00899422
9404	1500.86	1	0	1	0	0	0	0.00897086
9406	1500.9	1	0	1	0	0	0	0.008974
9408	1500.93	1	0	1	0	0	0	0.00895307
9410	1500.96	1	0	1	0	0	0	0.00894924
9412	1501	1	0	1	0	0	0	0.00894784
9414	1501.03	1	0	1	0	0	0	0.00896772
9416	1501.06	1	0	1	0	0	0	0.00898027
9418	1501.1	1	0	1	0	0	0	0.00893494
9420	1501.13	1	0	1	0	0	0	0.00894122
9422	1501.16	1	0	1	0	0	0	0.00895273
9424	1501.2	1	0	1	0	0	0	0.00898271
9426	1501.23	1	0	1	0	0	0	0.00898829
9428	1501.26	1	0	1	0	0	0	0.00897574
9430	1501.3	1	0	1	0	0	0	0.00892518
9432	1501.33	1	0	1	0	0	0	0.00899945
9434	1501.36	1	0	1	0	0	0	0.00894819
9436	1501.4	1	0	1	0	0	0	0.00894645
9438	1501.43	1	0	1	0	0	0	0.00893285
9440	1501.46	1	0	1	0	0	0	0.00893599
9442	1501.5	1	0	1	0	0	0	0.00895831
9444	1501.53	1	0	1	0	0	0	0.00893041
9446	1501.56	1	0	1	0	0	0	0.00895133
9448	1501.6	1	0	1	0	0	0	0.00893878
9450	1501.63	1	0	1	0	0	0	0.00896737
9452	1501.66	1	0	1	0	0	0	0.00896598
9454	1501.7	1	0	1	0	0	0	0.00896563
9456	1501.73	1	0	1	0	0	0	0.00894192
9458	1501.76	1	0	1	0	0	0	0.00893808
9460	1501.8	1	0	1	0	0	0	0.00899771
9462	1501.83	1	0	1	0	0	0	0.00894645
9464	1501.86	1	0	1	0	0	0	0.00894157
9466	1501.9	1	0	1	0	0	0	0.00896667
9468	1501.93	1	0	1	0	0	0	0.00894436
9470	1501.96	1	0	1	0	0	0	0.00895203
9472	1502	1	0	1	0	0	0	0.00896981
9474	1502.03	1	0	1	0	0	0	0.00897121
9476	1502.06	1	0	1	0	0	0	0.00892169
9478	1502.1	1	0	1	0	0	0	0.00895691
9480	1502.13	1	0	1	0	0	0	0.00895377
9482	1502.16	1	0	1	0	0	0	0.00893076
9484	1502.2	1	0	1	0	0	0	0.00895273
9486	1502.23	1	0	1	0	0	0	0.00892588
9488	1502.26	1	0	1	0	0	0	0.00899039
9490	1502.3	1	0	1	0	0	0	0.00895447
9492	1502.33	1	0	1	0	0	0	0.00898167
9494	1502.36	1	0	1	0	0	0	0.00894715
9496	1502.4	1	0	1	0	0	0	0.00891228
9498	1502.43	1	0	1	0	0	0	0.00892657
9500	1502.46	1	0	1	0	0	0	0.00895935
9502	1502.5	1	0	1	0	0	0	0.00894331
9504	1502.53	1	0	1	0	0	0	0.00894017
9506	1502.56	1	0	1	0	0	0	0.00894226
9508	1502.6	1	0	1	0	0	0	0.00898132
9510	1502.63	1	0	1	0	0	0	0.00893006
9512	1502.66	1	0	1	0	0	0	0.008974
9514	1502.7	1	0	1	0	0	0	0.00897609
9516	1502.73	1	0	1	0	0	0	0.00896388
9518	1502.76	1	0	1	0	0	0	0.00895761
9520	1502.8	1	0	1	0	0	0	0.00893634
9522	1502.83	1	0	1	0	0	0	0.00897225
9524	1502.86	1	0	1	0	0	0	0.0089597
9526	1502.9	1	0	1	0	0	0	0.00891925
9528	1502.93	1	0	1	0	0	0	0.00894226
9530	1502.96	1	0	1	0	0	0	0.00891995
9532	1503	1	0	1	0	0	0	0.00894471
9534	1503.03	1	0	1	0	0	0	0.00894087
9536	1503.06	1	0	1	0	0	0	0.00895482
9538	1503.1	1	0	1	0	0	0	0.00894087
9540	1503.13	1	0	1	0	0	0	0.00890809
9542	1503.16	1	0	1	0	0	0	0.00896005
9544	1503.2	1	0	1	0	0	0	0.00889658
9546	1503.23	1	0	1	0	0	0	0.00893424
9548	1503.26	1	0	1	0	0	0	0.00890286
9550	1503.3	1	0	1	0	0	0	0.00899283
9552	1503.33	1	0	1	0	0	0	0.00897818
9554	1503.36	1	0	1	0	0	0	0.0089332
9556	1503.4	1	0	1	0	0	0	0.00893564
9558	1503.43	1	0	1	0	0	0	0.00896249
9560	1503.46	1	0	1	0	0	0	0.00893982
9562	1503.5	1	0	1	0	0	0	0.00893947
9564	1503.53	1	0	1	0	0	0	0.00896772
9566	1503.56	1	0	1	0	0	0	0.00894645
9568	1503.6	1	0	1	0	0	0	0.00893529
9570	1503.63	1	0	1	0	0	0	0.00896981
9572	1503.66	1	0	1	0	0	0	0.00894087
9574	1503.7	1	0	1	0	0	0	0.00894854
9576	1503.73	1	0	1	0	0	0	0.00893529
9578	1503.76	1	0	1	0	0	0	0.00896598
9580	1503.8	1	0	1	0	0	0	0.00891402
9582	1503.83	1	0	1	0	0	0	0.00897539
9584	1503.86	1	0	1	0	0	0	0.00894401
9586	1503.9	1	0	1	0	0	0	0.00895133
9588	1503.93	1	0	1	0	0	0	0.00897121
9590	1503.96	1	0	1	0	0	0	0.00895761
9592	1504	1	0	1	0	0	0	0.00895168
9594	1504.03	1	0	1	0	0	0	0.00895865
9596	1504.06	1	0	1	0	0	0	0.00895447
9598	1504.1	1	0	1	0	0	0	0.00892622
9600	1504.13	1	0	1	0	0	0	0.00895691
9602	1504.16	1	0	1	0	0	0	0.00893355
9604	1504.2	1	0	1	0	0	0	0.00895203
9606	1504.23	1	0	1	0	0	0	0.00894784
9608	1504.26	1	0	1	0	0	0	0.00896144
9610	1504.3	1	0	1	0	0	0	0.00894819
9612	1504.33	1	0	1	0	0	0	0.00894889
9614	1504.36	1	0	1	0	0	0	0.00895691
9616	1504.4	1	0	1	0	0	0	0.00894436
9618	1504.43	1	0	1	0	0	0	0.00890704
9620	1504.46	1	0	1	0	0	0	0.00892518
9622	1504.5	1	0	1	0	0	0	0.00891193
9624	1504.53	1	0	1	0	0	0	0.008959
9626	1504.56	1	0	1	0	0	0	0.00892657
9628	1504.6	1	0	1	0	0	0	0.00894087
9630	1504.63	1	0	1	0	0	0	0.00900259
9632	1504.66	1	0	1	0	0	0	0.00892239
9634	1504.7	1	0	1	0	0	0	0.00901445
9636	1504.73	1	0	1	0	0	0	0.0089325
9638	1504.76	1	0	1	0	0	0	0.00898027
9640	1504.8	1	0	1	0	0	0	0.00895796
9642	1504.83	1	0	1	0	0	0	0.00900189
9644	1504.86	1	0	1	0	0	0	0.00895935
9646	1504.9	1	0	1	0	0	0	0.00897888
9648	1504.93	1	0	1	0	0	0	0.00899004
9650	1504.96	1	0	1	0	0	0	0.00895098
9652	1505	1	0	1	0	0	0	0.00898097
9654	1505.03	1	0	1	0	0	0	0.00899248
9656	1505.06	1	0	1	0	0	0	0.00900468
9658	1505.1	1	0	1	0	0	0	0.00898237
9660	1505.13	1	0	1	0	0	0	0.008974
9662	1505.16	1	0	1	0	0	0	0.00900259
9664	1505.2	1	0	1	0	0	0	0.00898306
9666	1505.23	1	0	1	0	0	0	0.00899004
9668	1505.26	1	0	1	0	0	0	0.00896144
9670	1505.3	1	0	1	0	0	0	0.00897853
9672	1505.33	1	0	1	0	0	0	0.00900852
9674	1505.36	1	0	1	0	0	0	0.00893145
9676	1505.4	1	0	1	0	0	0	0.00900573
9678	1505.43	1	0	1	0	0	0	0.00896109
9680	1505.46	1	0	1	0	0	0	0.00897679
9682	1505.5	1	0	1	0	0	0	0.00896144
9684	1505.53	1	0	1	0	0	0	0.00891855
9686	1505.56	1	0	1	0	0	0	0.00894122
9688	1505.6	1	0	1	0	0	0	0.00899666
9690	1505.63	1	0	1	0	0	0	0.00897923
9692	1505.66	1	0	1	0	0	0	0.00898725
9694	1505.7	1	0	1	0	0	0	0.00895726
9696	1505.73	1	0	1	0	0	0	0.00894505
9698	1505.76	1	0	1	0	0	0	0.0089991
9700	1505.8	1	0	1	0	0	0	0.00896633
9702	1505.83	1	0	1	0	0	0	0.00899318
9704	1505.86	1	0	1	0	0	0	0.00894505
9706	1505.9	1	0	1	0	0	0	0.00892588
9708	1505.93	1	0	1	0	0	0	0.00893947
9710	1505.96	1	0	1	0	0	0	0.00896528
9712	1506	1	0	1	0	0	0	0.00894505
9714	1506.03	1	0	1	0	0	0	0.00896423
9716	1506.06	1	0	1	0	0	0	0.00894924
9718	1506.1	1	0	1	0	0	0	0.00901026
9720	1506.13	1	0	1	0	0	0	0.00895935
9722	1506.16	1	0	1	0	0	0	0.0089733
9724	1506.2	1	0	1	0	0	0	0.008974
9726	1506.23	1	0	1	0	0	0	0.00894192
9728	1506.26	1	0	1	0	0	0	0.00896702
9730	1506.3	1	0	1	0	0	0	0.0089719
9732	1506.33	1	0	1	0	0	0	0.00897644
9734	1506.36	1	0	1	0	0	0	0.00894226
9736	1506.4	1	0	1	0	0	0	0.00900747
9738	1506.43	1	0	1	0	0	0	0.00896842
9740	1506.46	1	0	1	0	0	0	0.00898725
9742	1506.5	1	0	1	0	0	0	0.0089461
9744	1506.53	1	0	1	0	0	0	0.00890251
9746	1506.56	1	0	1	0	0	0	0.00894226
9748	1506.6	1	0	1	0	0	0	0.0089733
9750	1506.63	1	0	1	0	0	0	0.00894819
9752	1506.66	1	0	1	0	0	0	0.00896354
9754	1506.7	1	0	1	0	0	0	0.00895656
9756	1506.73	1	0	1	0	0	0	0.00896388
9758	1506.76	1	0	1	0	0	0	0.00893494
9760	1506.8	1	0	1	0	0	0	0.00898097
9762	1506.83	1	0	1	0	0	0	0.00900678
9764	1506.86	1	0	1	0	0	0	0.00896737
9766	1506.9	1	0	1	0	0	0	0.00893006
9768	1506.93	1	0	1	0	0	0	0.00897783
9770	1506.96	1	0	1	0	0	0	0.0089733
9772	1507	1	0	1	0	0	0	0.00898027
9774	1507.03	1	0	1	0	0	0	0.0089862
9776	1507.06	1	0	1	0	0	0	0.00893738
9778	1507.1	1	0	1	0	0	0	0.00897888
9780	1507.13	1	0	1	0	0	0	0.00898481
9782	1507.16	1	0	1	0	0	0	0.00902072
9784	1507.2	1	0	1	0	0	0	0.0089196
9786	1507.23	1	0	1	0	0	0	0.00894959
9788	1507.26	1	0	1	0	0	0	0.00898725
9790	1507.3	1	0	1	0	0	0	0.00896109
9792	1507.33	1	0	1	0	0	0	0.00898969
9794	1507.36	1	0	1	0	0	0	0.00893738
9796	1507.4	1	0	1	0	0	0	0.00894924
9798	1507.43	1	0	1	0	0	0	0.00893041
9800	1507.46	1	0	1	0	0	0	0.00898202
9802	1507.5	1	0	1	0	0	0	0.00897714
9804	1507.53	1	0	1	0	0	0	0.00899143
9806	1507.56	1	0	1	0	0	0	0.00898899
9808	1507.6	1	0	1	0	0	0	0.00896981
9810	1507.63	1	0	1	0	0	0	0.00892099
9812	1507.66	1	0	1	0	0	0	0.00891262
9814	1507.7	1	0	1	0	0	0	0.00890147
9816	1507.73	1	0	1	0	0	0	0.00892343
9818	1507.76	1	0	1	0	0	0	0.0089461
9820	1507.8	1	0	1	0	0	0	0.00896842
9822	1507.83	1	0	1	0	0	0	0.00894017
9824	1507.86	1	0	1	0	0	0	0.00899039
9826	1507.9	1	0	1	0	0	0	0.00896005
9828	1507.93	1	0	1	0	0	0	0.00895028
9830	1507.96	1	0	1	0	0	0	0.00893843
9832	1508	1	0	1	0	0	0	0.00894366
9834	1508.03	1	0	1	0	0	0	0.0089475
9836	1508.06	1	0	1	0	0	0	0.0089318
9838	1508.1	1	0	1	0	0	0	0.00893145
9840	1508.13	1	0	1	0	0	0	0.00892239
9842	1508.16	1	0	1	0	0	0	0.00893285
9844	1508.2	1	0	1	0	0	0	0.00896528
9846	1508.23	1	0	1	0	0	0	0.00894331
9848	1508.26	1	0	1	0	0	0	0.00893285
9850	1508.3	1	0	1	0	0	0	0.00892099
9852	1508.33	1	0	1	0	0	0	0.0089454
9854	1508.36	1	0	1	0	0	0	0.00898516
9856	1508.4	1	0	1	0	0	0	0.00893634
9858	1508.43	1	0	1	0	0	0	0.0089332
9860	1508.46	1	0	1	0	0	0	0.00895133
9862	1508.5	1	0	1	0	0	0	0.00897853
9864	1508.53	1	0	1	0	0	0	0.00890809
9866	1508.56	1	0	1	0	0	0	0.0089726
9868	1508.6	1	0	1	0	0	0	0.00892413
9870	1508.63	1	0	1	0	0	0	0.00897714
9872	1508.66	1	0	1	0	0	0	0.00895203
9874	1508.7	1	0	1	0	0	0	0.00896877
9876	1508.73	1	0	1	0	0	0	0.00892378
9878	1508.76	1	0	1	0	0	0	0.00893494
9880	1508.8	1	0	1	0	0	0	0.00893773
9882	1508.83	1	0	1	0	0	0	0.00892274
9884	1508.86	1	0	1	0	0	0	0.00890809
9886	1508.9	1	0	1	0	0	0	0.00889763
9888	1508.93	1	0	1	0	0	0	0.00892727
9890	1508.96	1	0	1	0	0	0	0.00892657
9892	1509	1	0	1	0	0	0	0.00887183
9894	1509.03	1	0	1	0	0	0	0.0088795
9896	1509.06	1	0	1	0	0	0	0.00886241
9898	1509.1	1	0	1	0	0	0	0.00892309
9900	1509.13	1	0	1	0	0	0	0.00892657
9902	1509.16	1	0	1	0	0	0	0.00890774
9904	1509.2	1	0	1	0	0	0	0.00892483
9906	1509.23	1	0	1	0	0	0	0.00888194
9908	1509.26	1	0	1	0	0	0	0.0088931
9910	1509.3	1	0	1	0	0	0	0.00888264
9912	1509.33	1	0	1	0	0	0	0.00891995
9914	1509.36	1	0	1	0	0	0	0.00886973
9916	1509.4	1	0	1	0	0	0	0.00895761
9918	1509.43	1	0	1	0	0	0	0.00885788
9920	1509.46	1	0	1	0	0	0	0.00888787
9922	1509.5	1	0	1	0	0	0	0.00890635
9924	1509.53	1	0	1	0	0	0	0.00888577
9926	1509.56	1	0	1	0	0	0	0.00889484
9928	1509.6	1	0	1	0	0	0	0.00893006
9930	1509.63	1	0	1	0	0	0	0.00886276
9932	1509.66	1	0	1	0	0	0	0.00888821
9934	1509.7	1	0	1	0	0	0	0.00891716
9936	1509.73	1	0	1	0	0	0	0.00891855
9938	1509.76	1	0	1	0	0	0	0.00887392
9940	1509.8	1	0	1	0	0	0	0.00888124
9942	1509.83	1	0	1	0	0	0	0.00887636
9944	1509.86	1	0	1	0	0	0	0.00888298
9946	1509.9	1	0	1	0	0	0	0.00890635
9948	1509.93	1	0	1	0	0	0	0.00889031
9950	1509.96	1	0	1	0	0	0	0.00889868
9952	1510	1	0	1	0	0	0	0.00890321
9954	1510.03	1	0	1	0	0	0	0.00889728
9956	1510.06	1	0	1	0	0	0	0.0089339
9958	1510.1	1	0	1	0	0	0	0.00890949
9960	1510.13	1	0	1	0	0	0	0.00890879
9962	1510.16	1	0	1	0	0	0	0.0089046
9964	1510.2	1	0	1	0	0	0	0.00892797
9966	1510.23	1	0	1	0	0	0	0.00892483
9968	1510.26	1	0	1	0	0	0	0.00892169
9970	1510.3	1	0	1	0	0	0	0.00892762
9972	1510.33	1	0	1	0	0	0	0.00893355
9974	1510.36	1	0	1	0	0	0	0.00895935
9976	1510.4	1	0	1	0	0	0	0.00895935
9978	1510.43	1	0	1	0	0	0	0.00893738
9980	1510.46	1	0	1	0	0	0	0.00894924
9982	1510.5	1	0	1	0	0	0	0.00894331
9984	1510.53	1	0	1	0	0	0	0.0089604
9986	1510.56	1	0	1	0	0	0	0.00901026
9988	1510.6	1	0	1	0	0	0	0.00896249
9990	1510.63	1	0	1	0	0	0	0.00895726
9992	1510.66	1	0	1	0	0	0	0.00895028
9994	1510.7	1	0	1	0	0	0	0.0089325
9996	1510.73	1	0	1	0	0	0	0.00900364
9998	1510.76	1	0	1	0	0	0	0.00894715
10000	1510.8	1	0	1	0	0	0	0.008959
10002	1510.83	1	0	1	0	0	0	0.00900678
10004	1510.86	1	0	1	0	0	0	0.00896667
10006	1510.9	1	0	1	0	0	0	0.008959
10008	1510.93	1	0	1	0	0	0	0.00897121
10010	1510.96	1	0	1	0	0	0	0.00896911
10012	1511	1	0	1	0	0	0	0.00900887
10014	1511.03	1	0	1	0	0	0	0.00896981
10016	1511.06	1	0	1	0	0	0	0.00890739
10018	1511.1	1	0	1	0	0	0	0.00896144
10020	1511.13	1	0	1	0	0	0	0.00893285
10022	1511.16	1	0	1	0	0	0	0.00894296
10024	1511.2	1	0	1	0	0	0	0.00894226
10026	1511.23	1	0	1	0	0	0	0.00890844
10028	1511.26	1	0	1	0	0	0	0.00892727
10030	1511.3	1	0	1	0	0	0	0.00893599
10032	1511.33	1	0	1	0	0	0	0.00890321
10034	1511.36	1	0	1	0	0	0	0.00896842
10036	1511.4	1	0	1	0	0	0	0.00890983
10038	1511.43	1	0	1	0	0	0	0.00894645
10040	1511.46	1	0	1	0	0	0	0.00894784
10042	1511.5	1	0	1	0	0	0	0.00894087
10044	1511.53	1	0	1	0	0	0	0.00895377
10046	1511.56	1	0	1	0	0	0	0.00890391
10048	1511.6	1	0	1	0	0	0	0.00898516
10050	1511.63	1	0	1	0	0	0	0.00896981
10052	1511.66	1	0	1	0	0	0	0.00894017
10054	1511.7	1	0	1	0	0	0	0.00898237
10056	1511.73	1	0	1	0	0	0	0.00897469
10058	1511.76	1	0	1	0	0	0	0.00894784
10060	1511.8	1	0	1	0	0	0	0.00890112
10062	1511.83	1	0	1	0	0	0	0.00899841
10064	1511.86	1	0	1	0	0	0	0.00899666
10066	1511.9	1	0	1	0	0	0	0.00894784
10068	1511.93	1	0	1	0	0	0	0.00896179
10070	1511.96	1	0	1	0	0	0	0.00899352
10072	1512	1	0	1	0	0	0	0.00895028
10074	1512.03	1	0	1	0	0	0	0.00895761
10076	1512.06	1	0	1	0	0	0	0.00891472
10078	1512.1	1	0	1	0	0	0	0.00894157
10080	1512.13	1	0	1	0	0	0	0.00891053
10082	1512.16	1	0	1	0	0	0	0.00891681
10084	1512.2	1	0	1	0	0	0	0.00896005
10086	1512.23	1	0	1	0	0	0	0.00897888
10088	1512.26	1	0	1	0	0	0	0.00894959
10090	1512.3	1	0	1	0	0	0	0.00898446
10092	1512.33	1	0	1	0	0	0	0.00891437
10094	1512.36	1	0	1	0	0	0	0.00899004
10096	1512.4	1	0	1	0	0	0	0.00895273
10098	1512.43	1	0	1	0	0	0	0.00895098
10100	1512.46	1	0	1	0	0	0	0.00895865
10102	1512.5	1	0	1	0	0	0	0.00898097
10104	1512.53	1	0	1	0	0	0	0.00897992
10106	1512.56	1	0	1	0	0	0	0.00893494
10108	1512.6	1	0	1	0	0	0	0.00895656
10110	1512.63	1	0	1	0	0	0	0.00894715
10112	1512.66	1	0	1	0	0	0	0.00897365
10114	1512.7	1	0	1	0	0	0	0.00895796
10116	1512.73	1	0	1	0	0	0	0.00894366
10118	1512.76	1	0	1	0	0	0	0.00896458
10120	1512.8	1	0	1	0	0	0	0.00898132
10122	1512.83	1	0	1	0	0	0	0.00899945
10124	1512.86	1	0	1	0	0	0	0.00895133
10126	1512.9	1	0	1	0	0	0	0.00900887
10128	1512.93	1	0	1	0	0	0	0.00895831
10130	1512.96	1	0	1	0	0	0	0.00895552
10132	1513	1	0	1	0	0	0	0.00899004
10134	1513.03	1	0	1	0	0	0	0.00894017
10136	1513.06	1	0	1	0	0	0	0.00893076
10138	1513.1	1	0	1	0	0	0	0.00895586
10140	1513.13	1	0	1	0	0	0	0.00896563
10142	1513.16	1	0	1	0	0	0	0.00896807
10144	1513.2	1	0	1	0	0	0	0.00894575
10146	1513.23	1	0	1	0	0	0	0.00895447
10148	1513.26	1	0	1	0	0	0	0.00895063
10150	1513.3	1	0	1	0	0	0	0.008974
10152	1513.33	1	0	1	0	0	0	0.00896144
10154	1513.36	1	0	1	0	0	0	0.00896737
10156	1513.4	1	0	1	0	0	0	0.00894715
10158	1513.43	1	0	1	0	0	0	0.00893669
10160	1513.46	1	0	1	0	0	0	0.00892099
10162	1513.5	1	0	1	0	0	0	0.00895412
10164	1513.53	1	0	1	0	0	0	0.0089067
10166	1513.56	1	0	1	0	0	0	0.00896737
10168	1513.6	1	0	1	0	0	0	0.00893913
10170	1513.63	1	0	1	0	0	0	0.00891088
10172	1513.66	1	0	1	0	0	0	0.00894959
10174	1513.7	1	0	1	0	0	0	0.00890704
10176	1513.73	1	0	1	0	0	0	0.00897679
10178	1513.76	1	0	1	0	0	0	0.00897748
10180	1513.8	1	0	1	0	0	0	0.00893006
10182	1513.83	1	0	1	0	0	0	0.00896144
10184	1513.86	1	0	1	0	0	0	0.0089726
10186	1513.9	1	0	1	0	0	0	0.00896702
10188	1513.93	1	0	1	0	0	0	0.00895691
10190	1513.96	1	0	1	0	0	0	0.00897086
10192	1514	1	0	1	0	0	0	0.00899108
10194	1514.03	1	0	1	0	0	0	0.00898864
10196	1514.06	1	0	1	0	0	0	0.00896981
10198	1514.1	1	0	1	0	0	0	0.00895796
10200	1514.13	1	0	1	0	0	0	0.00894924
10202	1514.16	1	0	1	0	0	0	0.00895063
10204	1514.2	1	0	1	0	0	0	0.00895028
10206	1514.23	1	0	1	0	0	0	0.0089189
10208	1514.26	1	0	1	0	0	0	0.00887566
10210	1514.3	1	0	1	0	0	0	0.00892064
10212	1514.33	1	0	1	0	0	0	0.00892309
10214	1514.36	1	0	1	0	0	0	0.00890844
10216	1514.4	1	0	1	0	0	0	0.00892483
10218	1514.43	1	0	1	0	0	0	0.00888543
10220	1514.46	1	0	1	0	0	0	0.00889066
10222	1514.5	1	0	1	0	0	0	0.00894784
10224	1514.53	1	0	1	0	0	0	0.00890321
10226	1514.56	1	0	1	0	0	0	0.008906
10228	1514.6	1	0	1	0	0	0	0.0089182
10230	1514.63	1	0	1	0	0	0	0.00888159
10232	1514.66	1	0	1	0	0	0	0.00884776
10234	1514.7	1	0	1	0	0	0	0.00892309
10236	1514.73	1	0	1	0	0	0	0.00889658
10238	1514.76	1	0	1	0	0	0	0.00891785
10240	1514.8	1	0	1	0	0	0	0.00886415
10242	1514.83	1	0	1	0	0	0	0.00892343
10244	1514.86	1	0	1	0	0	0	0.00892797
10246	1514.9	1	0	1	0	0	0	0.00886694
10248	1514.93	1	0	1	0	0	0	0.00891681
10250	1514.96	1	0	1	0	0	0	0.00887252
10252	1515	1	0	1	0	0	0	0.00888403
10254	1515.03	1	0	1	0	0	0	0.00888124
10256	1515.06	1	0	1	0	0	0	0.00891437
10258	1515.1	1	0	1	0	0	0	0.00891193
10260	1515.13	1	0	1	0	0	0	0.0089182
10262	1515.16	1	0	1	0	0	0	0.00891995
10264	1515.2	1	0	1	0	0	0	0.0088795
10266	1515.23	1	0	1	0	0	0	0.00895761
10268	1515.26	1	0	1	0	0	0	0.00890321
10270	1515.3	1	0	1	0	0	0	0.00892657
10272	1515.33	1	0	1	0	0	0	0.0089196
10274	1515.36	1	0	1	0	0	0	0.00888821
10276	1515.4	1	0	1	0	0	0	0.00890216
10278	1515.43	1	0	1	0	0	0	0.00886415
10280	1515.46	1	0	1	0	0	0	0.00893913
10282	1515.5	1	0	1	0	0	0	0.00888333
10284	1515.53	1	0	1	0	0	0	0.00891751
10286	1515.56	1	0	1	0	0	0	0.00893145
10288	1515.6	1	0	1	0	0	0	0.00888787
10290	1515.63	1	0	1	0	0	0	0.00889589
10292	1515.66	1	0	1	0	0	0	0.00889135
10294	1515.7	1	0	1	0	0	0	0.00886764
10296	1515.73	1	0	1	0	0	0	0.0088788
10298	1515.76	1	0	1	0	0	0	0.0089318
10300	1515.8	1	0	1	0	0	0	0.00890007
10302	1515.83	1	0	1	0	0	0	0.00891785
10304	1515.86	1	0	1	0	0	0	0.00888821
10306	1515.9	1	0	1	0	0	0	0.00891541
10308	1515.93	1	0	1	0	0	0	0.00890914
10310	1515.96	1	0	1	0	0	0	0.00888717
10312	1516	1	0	1	0	0	0	0.00891611
10314	1516.03	1	0	1	0	0	0	0.00889589
10316	1516.06	1	0	1	0	0	0	0.00892797
10318	1516.1	1	0	1	0	0	0	0.008959
10320	1516.13	1	0	1	0	0	0	0.00894575
10322	1516.16	1	0	1	0	0	0	0.00887183
10324	1516.2	1	0	1	0	0	0	0.00889379
10326	1516.23	1	0	1	0	0	0	0.00889833
10328	1516.26	1	0	1	0	0	0	0.00890565
10330	1516.3	1	0	1	0	0	0	0.00889519
10332	1516.33	1	0	1	0	0	0	0.00894192
10334	1516.36	1	0	1	0	0	0	0.00889414
10336	1516.4	1	0	1	0	0	0	0.00891751
10338	1516.43	1	0	1	0	0	0	0.00890251
10340	1516.46	1	0	1	0	0	0	0.00890147
10342	1516.5	1	0	1	0	0	0	0.00892413
10344	1516.53	1	0	1	0	0	0	0.0089196
10346	1516.56	1	0	1	0	0	0	0.0089597
10348	1516.6	1	0	1	0	0	0	0.00892971
10350	1516.63	1	0	1	0	0	0	0.00888787
10352	1516.66	1	0	1	0	0	0	0.00892936
10354	1516.7	1	0	1	0	0	0	0.00890844
10356	1516.73	1	0	1	0	0	0	0.00894505
10358	1516.76	1	0	1	0	0	0	0.00892274
10360	1516.8	1	0	1	0	0	0	0.00891367
10362	1516.83	1	0	1	0	0	0	0.00890949
10364	1516.86	1	0	1	0	0	0	0.00895761
10366	1516.9	1	0	1	0	0	0	0.00889937
10368	1516.93	1	0	1	0	0	0	0.00886799
10370	1516.96	1	0	1	0	0	0	0.00891472
10372	1517	1	0	1	0	0	0	0.00889763
10374	1517.03	1	0	1	0	0	0	0.00889205
10376	1517.06	1	0	1	0	0	0	0.00889728
10378	1517.1	1	0	1	0	0	0	0.0089046
10380	1517.13	1	0	1	0	0	0	0.00891123
10382	1517.16	1	0	1	0	0	0	0.00886625
10384	1517.2	1	0	1	0	0	0	0.0089196
10386	1517.23	1	0	1	0	0	0	0.00891437
10388	1517.26	1	0	1	0	0	0	0.00887706
10390	1517.3	1	0	1	0	0	0	0.00893738
10392	1517.33	1	0	1	0	0	0	0.00892239
10394	1517.36	1	0	1	0	0	0	0.00889763
10396	1517.4	1	0	1	0	0	0	0.00889624
10398	1517.43	1	0	1	0	0	0	0.00891541
10400	1517.46	1	0	1	0	0	0	0.00888856
10402	1517.5	1	0	1	0	0	0	0.00891681
10404	1517.53	1	0	1	0	0	0	0.00893215
10406	1517.56	1	0	1	0	0	0	0.00890949
10408	1517.6	1	0	1	0	0	0	0.00893599
10410	1517.63	1	0	1	0	0	0	0.00893843
10412	1517.66	1	0	1	0	0	0	0.00892483
10414	1517.7	1	0	1	0	0	0	0.00894505
10416	1517.73	1	0	1	0	0	0	0.00892099
10418	1517.76	1	0	1	0	0	0	0.00893145
10420	1517.8	1	0	1	0	0	0	0.00888821
10422	1517.83	1	0	1	0	0	0	0.00893006
10424	1517.86	1	0	1	0	0	0	0.00889868
10426	1517.9	1	0	1	0	0	0	0.00895098
10428	1517.93	1	0	1	0	0	0	0.00891297
10430	1517.96	1	0	1	0	0	0	0.00891576
10432	1518	1	0	1	0	0	0	0.00890112
10434	1518.03	1	0	1	0	0	0	0.00892239
10436	1518.06	1	0	1	0	0	0	0.00890042
10438	1518.1	1	0	1	0	0	0	0.00889728
10440	1518.13	1	0	1	0	0	0	0.00882754
10442	1518.16	1	0	1	0	0	0	0.00884079
10444	1518.2	1	0	1	0	0	0	0.00883068
10446	1518.23	1	0	1	0	0	0	0.00887601
10448	1518.26	1	0	1	0	0	0	0.00882998
10450	1518.3	1	0	1	0	0	0	0.00889937
10452	1518.33	1	0	1	0	0	0	0.00886904
10454	1518.36	1	0	1	0	0	0	0.00890704
10456	1518.4	1	0	1	0	0	0	0.00886381
10458	1518.43	1	0	1	0	0	0	0.00889624
10460	1518.46	1	0	1	0	0	0	0.00887183
10462	1518.5	1	0	1	0	0	0	0.00885195
10464	1518.53	1	0	1	0	0	0	0.0088516
10466	1518.56	1	0	1	0	0	0	0.00882475
10468	1518.6	1	0	1	0	0	0	0.0089053
10470	1518.63	1	0	1	0	0	0	0.00888682
10472	1518.66	1	0	1	0	0	0	0.00888996
10474	1518.7	1	0	1	0	0	0	0.00884428
10476	1518.73	1	0	1	0	0	0	0.00884497
10478	1518.76	1	0	1	0	0	0	0.00888647
10480	1518.8	1	0	1	0	0	0	0.00882266
10482	1518.83	1	0	1	0	0	0	0.00887287
10484	1518.86	1	0	1	0	0	0	0.00883486
10486	1518.9	1	0	1	0	0	0	0.00883626
10488	1518.93	1	0	1	0	0	0	0.00885997
10490	1518.96	1	0	1	0	0	0	0.00888159
10492	1519	1	0	1	0	0	0	0.00886659
10494	1519.03	1	0	1	0	0	0	0.00883661
10496	1519.06	1	0	1	0	0	0	0.00881812
10498	1519.1	1	0	1	0	0	0	0.008838
10500	1519.13	1	0	1	0	0	0	0.00882091
10502	1519.16	1	0	1	0	0	0	0.00881673
10504	1519.2	1	0	1	0	0	0	0.0088394
10506	1519.23	1	0	1	0	0	0	0.00888647
10508	1519.26	1	0	1	0	0	0	0.00886764
10510	1519.3	1	0	1	0	0	0	0.00882824
10512	1519.33	1	0	1	0	0	0	0.00891681
10514	1519.36	1	0	1	0	0	0	0.0088659
10516	1519.4	1	0	1	0	0	0	0.00887217
10518	1519.43	1	0	1	0	0	0	0.00884916
10520	1519.46	1	0	1	0	0	0	0.00888473
10522	1519.5	1	0	1	0	0	0	0.00884253
10524	1519.53	1	0	1	0	0	0	0.00886032
10526	1519.56	1	0	1	0	0	0	0.0088509
10528	1519.6	1	0	1	0	0	0	0.0088645
10530	1519.63	1	0	1	0	0	0	0.00883138
10532	1519.66	1	0	1	0	0	0	0.00887601
10534	1519.7	1	0	1	0	0	0	0.00885788
10536	1519.73	1	0	1	0	0	0	0.00882928
10538	1519.76	1	0	1	0	0	0	0.00884114
10540	1519.8	1	0	1	0	0	0	0.00881185
10542	1519.83	1	0	1	0	0	0	0.00887566
10544	1519.86	1	0	1	0	0	0	0.00889135
10546	1519.9	1	0	1	0	0	0	0.00884114
10548	1519.93	1	0	1	0	0	0	0.00884393
10550	1519.96	1	0	1	0	0	0	0.0088244
10552	1520	1	0	1	0	0	0	0.00882614
10554	1520.03	1	0	1	0	0	0	0.00885857
10556	1520.06	1	0	1	0	0	0	0.00885439
10558	1520.1	1	0	1	0	0	0	0.00882719
10560	1520.13	1	0	1	0	0	0	0.008853
10562	1520.16	1	0	1	0	0	0	0.00882475
10564	1520.2	1	0	1	0	0	0	0.00884637
10566	1520.23	1	0	1	0	0	0	0.00888159
10568	1520.26	1	0	1	0	0	0	0.00882301
10570	1520.3	1	0	1	0	0	0	0.00881743
10572	1520.33	1	0	1	0	0	0	0.00885055
10574	1520.36	1	0	1	0	0	0	0.00887845
10576	1520.4	1	0	1	0	0	0	0.00883138
10578	1520.43	1	0	1	0	0	0	0.00880801
10580	1520.46	1	0	1	0	0	0	0.00883103
10582	1520.5	1	0	1	0	0	0	0.00886311
10584	1520.53	1	0	1	0	0	0	0.00883033
10586	1520.56	1	0	1	0	0	0	0.00885334
10588	1520.6	1	0	1	0	0	0	0.00886067
10590	1520.63	1	0	1	0	0	0	0.00886764
10592	1520.66	1	0	1	0	0	0	0.00886694
10594	1520.7	1	0	1	0	0	0	0.00888508
10596	1520.73	1	0	1	0	0	0	0.00884184
10598	1520.76	1	0	1	0	0	0	0.00884776
10600	1520.8	1	0	1	0	0	0	0.00887322
10602	1520.83	1	0	1	0	0	0	0.00885962
10604	1520.86	1	0	1	0	0	0	0.00884428
10606	1520.9	1	0	1	0	0	0	0.00883905
10608	1520.93	1	0	1	0	0	0	0.00884428
10610	1520.96	1	0	1	0	0	0	0.00886346
10612	1521	1	0	1	0	0	0	0.00884463
10614	1521.03	1	0	1	0	0	0	0.0089053
10616	1521.06	1	0	1	0	0	0	0.00885753
10618	1521.1	1	0	1	0	0	0	0.0088917
10620	1521.13	1	0	1	0	0	0	0.0088924
10622	1521.16	1	0	1	0	0	0	0.00891716
10624	1521.2	1	0	1	0	0	0	0.00890147
10626	1521.23	1	0	1	0	0	0	0.00885753
10628	1521.26	1	0	1	0	0	0	0.00886415
10630	1521.3	1	0	1	0	0	0	0.00885439
10632	1521.33	1	0	1	0	0	0	0.00879511
10634	1521.36	1	0	1	0	0	0	0.00886381
10636	1521.4	1	0	1	0	0	0	0.00886764
10638	1521.43	1	0	1	0	0	0	0.00890147
10640	1521.46	1	0	1	0	0	0	0.00884393
10642	1521.5	1	0	1	0	0	0	0.0088917
10644	1521.53	1	0	1	0	0	0	0.0088509
10646	1521.56	1	0	1	0	0	0	0.00884114
10648	1521.6	1	0	1	0	0	0	0.00889693
10650	1521.63	1	0	1	0	0	0	0.00888752
10652	1521.66	1	0	1	0	0	0	0.00885648
10654	1521.7	1	0	1	0	0	0	0.00882684
10656	1521.73	1	0	1	0	0	0	0.00889066
10658	1521.76	1	0	1	0	0	0	0.00885892
10660	1521.8	1	0	1	0	0	0	0.00887636
10662	1521.83	1	0	1	0	0	0	0.00888752
10664	1521.86	1	0	1	0	0	0	0.00886032
10666	1521.9	1	0	1	0	0	0	0.00889693
10668	1521.93	1	0	1	0	0	0	0.00889937
10670	1521.96	1	0	1	0	0	0	0.00887183
10672	1522	1	0	1	0	0	0	0.00889937
10674	1522.03	1	0	1	0	0	0	0.00889902
10676	1522.06	1	0	1	0	0	0	0.00890181
10678	1522.1	1	0	1	0	0	0	0.00889519
10680	1522.13	1	0	1	0	0	0	0.00887496
10682	1522.16	1	0	1	0	0	0	0.00888856
10684	1522.2	1	0	1	0	0	0	0.00891785
10686	1522.23	1	0	1	0	0	0	0.00888298
10688	1522.26	1	0	1	0	0	0	0.00889484
10690	1522.3	1	0	1	0	0	0	0.00889484
10692	1522.33	1	0	1	0	0	0	0.00892448
10694	1522.36	1	0	1	0	0	0	0.00887636
10696	1522.4	1	0	1	0	0	0	0.00888647
10698	1522.43	1	0	1	0	0	0	0.00885404
10700	1522.46	1	0	1	0	0	0	0.00886555
10702	1522.5	1	0	1	0	0	0	0.0088781
10704	1522.53	1	0	1	0	0	0	0.00882928
10706	1522.56	1	0	1	0	0	0	0.0088645
10708	1522.6	1	0	1	0	0	0	0.0088795
10710	1522.63	1	0	1	0	0	0	0.00885369
10712	1522.66	1	0	1	0	0	0	0.00890983
10714	1522.7	1	0	1	0	0	0	0.00887915
10716	1522.73	1	0	1	0	0	0	0.00885021
10718	1522.76	1	0	1	0	0	0	0.00884637
10720	1522.8	1	0	1	0	0	0	0.00888298
10722	1522.83	1	0	1	0	0	0	0.00886171
10724	1522.86	1	0	1	0	0	0	0.00884149
10726	1522.9	1	0	1	0	0	0	0.00887462
10728	1522.93	1	0	1	0	0	0	0.00886555
10730	1522.96	1	0	1	0	0	0	0.00888961
10732	1523	1	0	1	0	0	0	0.00886555
10734	1523.03	1	0	1	0	0	0	0.00884009
10736	1523.06	1	0	1	0	0	0	0.00882475
10738	1523.1	1	0	1	0	0	0	0.00882231
10740	1523.13	1	0	1	0	0	0	0.00881359
10742	1523.16	1	0	1	0	0	0	0.00879441
10744	1523.2	1	0	1	0	0	0	0.00886415
10746	1523.23	1	0	1	0	0	0	0.00879197
10748	1523.26	1	0	1	0	0	0	0.00882789
10750	1523.3	1	0	1	0	0	0	0.00885892
10752	1523.33	1	0	1	0	0	0	0.00884463
10754	1523.36	1	0	1	0	0	0	0.0088781
10756	1523.4	1	0	1	0	0	0	0.0088523
10758	1523.43	1	0	1	0	0	0	0.00884393
10760	1523.46	1	0	1	0	0	0	0.00886032
10762	1523.5	1	0	1	0	0	0	0.00883382
10764	1523.53	1	0	1	0	0	0	0.00877105
10766	1523.56	1	0	1	0	0	0	0.00884497
10768	1523.6	1	0	1	0	0	0	0.00888473
10770	1523.63	1	0	1	0	0	0	0.00888019
10772	1523.66	1	0	1	0	0	0	0.00887601
10774	1523.7	1	0	1	0	0	0	0.00887636
10776	1523.73	1	0	1	0	0	0	0.0088781
10778	1523.76	1	0	1	0	0	0	0.00888019
10780	1523.8	1	0	1	0	0	0	0.00888612
10782	1523.83	1	0	1	0	0	0	0.00891507
10784	1523.86	1	0	1	0	0	0	0.00888473
10786	1523.9	1	0	1	0	0	0	0.00889484
10788	1523.93	1	0	1	0	0	0	0.00888612
10790	1523.96	1	0	1	0	0	0	0.00887217
10792	1524	1	0	1	0	0	0	0.00888752
10794	1524.03	1	0	1	0	0	0	0.00884358
10796	1524.06	1	0	1	0	0	0	0.0088645
10798	1524.1	1	0	1	0	0	0	0.00883382
10800	1524.13	1	0	1	0	0	0	0.00882301
10802	1524.16	1	0	1	0	0	0	0.00885613
10804	1524.2	1	0	1	0	0	0	0.00885962
10806	1524.23	1	0	1	0	0	0	0.00885474
10808	1524.26	1	0	1	0	0	0	0.00884323
10810	1524.3	1	0	1	0	0	0	0.00887113
10812	1524.33	1	0	1	0	0	0	0.00879964
10814	1524.36	1	0	1	0	0	0	0.00882475
10816	1524.4	1	0	1	0	0	0	0.00878465
10818	1524.43	1	0	1	0	0	0	0.0087986
10820	1524.46	1	0	1	0	0	0	0.0087986
10822	1524.5	1	0	1	0	0	0	0.00879371
10824	1524.53	1	0	1	0	0	0	0.00884602
10826	1524.56	1	0	1	0	0	0	0.00881324
10828	1524.6	1	0	1	0	0	0	0.00880627
10830	1524.63	1	0	1	0	0	0	0.00884497
10832	1524.66	1	0	1	0	0	0	0.00883661
10834	1524.7	1	0	1	0	0	0	0.00882649
10836	1524.73	1	0	1	0	0	0	0.0088108
10838	1524.76	1	0	1	0	0	0	0.0088516
10840	1524.8	1	0	1	0	0	0	0.00881638
10842	1524.83	1	0	1	0	0	0	0.00884811
10844	1524.86	1	0	1	0	0	0	0.00878325
10846	1524.9	1	0	1	0	0	0	0.00883695
10848	1524.93	1	0	1	0	0	0	0.00879755
10850	1524.96	1	0	1	0	0	0	0.00886904
10852	1525	1	0	1	0	0	0	0.00879162
10854	1525.03	1	0	1	0	0	0	0.00883556
10856	1525.06	1	0	1	0	0	0	0.00885125
10858	1525.1	1	0	1	0	0	0	0.00884358
10860	1525.13	1	0	1	0	0	0	0.00882928
10862	1525.16	1	0	1	0	0	0	0.0088258
10864	1525.2	1	0	1	0	0	0	0.00880697
10866	1525.23	1	0	1	0	0	0	0.00885369
10868	1525.26	1	0	1	0	0	0	0.00883835
10870	1525.3	1	0	1	0	0	0	0.00888891
10872	1525.33	1	0	1	0	0	0	0.00880731
10874	1525.36	1	0	1	0	0	0	0.00885578
10876	1525.4	1	0	1	0	0	0	0.00889275
10878	1525.43	1	0	1	0	0	0	0.00881708
10880	1525.46	1	0	1	0	0	0	0.00884881
10882	1525.5	1	0	1	0	0	0	0.00887183
10884	1525.53	1	0	1	0	0	0	0.00888787
10886	1525.56	1	0	1	0	0	0	0.00884776
10888	1525.6	1	0	1	0	0	0	0.00886764
10890	1525.63	1	0	1	0	0	0	0.00884323
10892	1525.66	1	0	1	0	0	0	0.00889519
10894	1525.7	1	0	1	0	0	0	0.00887462
10896	1525.73	1	0	1	0	0	0	0.00883312
10898	1525.76	1	0	1	0	0	0	0.00885055
10900	1525.8	1	0	1	0	0	0	0.00885404
10902	1525.83	1	0	1	0	0	0	0.0088394
10904	1525.86	1	0	1	0	0	0	0.00882126
10906	1525.9	1	0	1	0	0	0	0.00884288
10908	1525.93	1	0	1	0	0	0	0.00888961
10910	1525.96	1	0	1	0	0	0	0.00889414
10912	1526	1	0	1	0	0	0	0.00886346
10914	1526.03	1	0	1	0	0	0	0.00883905
10916	1526.06	1	0	1	0	0	0	0.00883382
10918	1526.1	1	0	1	0	0	0	0.00885544
10920	1526.13	1	0	1	0	0	0	0.00884881
10922	1526.16	1	0	1	0	0	0	0.00885195
10924	1526.2	1	0	1	0	0	0	0.00885334
10926	1526.23	1	0	1	0	0	0	0.00889345
10928	1526.26	1	0	1	0	0	0	0.00885055
10930	1526.3	1	0	1	0	0	0	0.00886206
10932	1526.33	1	0	1	0	0	0	0.00884219
10934	1526.36	1	0	1	0	0	0	0.00884672
10936	1526.4	1	0	1	0	0	0	0.00884637
10938	1526.43	1	0	1	0	0	0	0.00883626
10940	1526.46	1	0	1	0	0	0	0.00881533
10942	1526.5	1	0	1	0	0	0	0.00884986
10944	1526.53	1	0	1	0	0	0	0.00882824
10946	1526.56	1	0	1	0	0	0	0.00880871
10948	1526.6	1	0	1	0	0	0	0.00884358
10950	1526.63	1	0	1	0	0	0	0.00877802
10952	1526.66	1	0	1	0	0	0	0.00879616
10954	1526.7	1	0	1	0	0	0	0.00880522
10956	1526.73	1	0	1	0	0	0	0.00875675
10958	1526.76	1	0	1	0	0	0	0.00882301
10960	1526.8	1	0	1	0	0	0	0.00879267
10962	1526.83	1	0	1	0	0	0	0.00880522
10964	1526.86	1	0	1	0	0	0	0.00876721
10966	1526.9	1	0	1	0	0	0	0.00883695
10968	1526.93	1	0	1	0	0	0	0.00878988
10970	1526.96	1	0	1	0	0	0	0.00882754
10972	1527	1	0	1	0	0	0	0.00882545
10974	1527.03	1	0	1	0	0	0	0.00880801
10976	1527.06	1	0	1	0	0	0	0.00883347
10978	1527.1	1	0	1	0	0	0	0.00879546
10980	1527.13	1	0	1	0	0	0	0.00881429
10982	1527.16	1	0	1	0	0	0	0.00882963
10984	1527.2	1	0	1	0	0	0	0.00877802
10986	1527.23	1	0	1	0	0	0	0.00883835
10988	1527.26	1	0	1	0	0	0	0.00883033
10990	1527.3	1	0	1	0	0	0	0.00882126
10992	1527.33	1	0	1	0	0	0	0.00876965
10994	1527.36	1	0	1	0	0	0	0.00878325
10996	1527.4	1	0	1	0	0	0	0.00879581
10998	1527.43	1	0	1	0	0	0	0.00877942
11000	1527.46	1	0	1	0	0	0	0.00880348
11002	1527.5	1	0	1	0	0	0	0.00876442
11004	1527.53	1	0	1	0	0	0	0.00883103
11006	1527.56	1	0	1	0	0	0	0.00881952
11008	1527.6	1	0	1	0	0	0	0.00880976
11010	1527.63	1	0	1	0	0	0	0.00880522
11012	1527.66	1	0	1	0	0	0	0.00881185
11014	1527.7	1	0	1	0	0	0	0.00880906
11016	1527.73	1	0	1	0	0	0	0.00885788
11018	1527.76	1	0	1	0	0	0	0.00881045
11020	1527.8	1	0	1	0	0	0	0.00882405
11022	1527.83	1	0	1	0	0	0	0.00883695
11024	1527.86	1	0	1	0	0	0	0.00883242
11026	1527.9	1	0	1	0	0	0	0.00879302
11028	1527.93	1	0	1	0	0	0	0.00884358
11030	1527.96	1	0	1	0	0	0	0.00885753
11032	1528	1	0	1	0	0	0	0.00883172
11034	1528.03	1	0	1	0	0	0	0.00881533
11036	1528.06	1	0	1	0	0	0	0.00885125
11038	1528.1	1	0	1	0	0	0	0.00883347
11040	1528.13	1	0	1	0	0	0	0.0088373
11042	1528.16	1	0	1	0	0	0	0.00881743
11044	1528.2	1	0	1	0	0	0	0.00880208
11046	1528.23	1	0	1	0	0	0	0.00883207
11048	1528.26	1	0	1	0	0	0	0.00882824
11050	1528.3	1	0	1	0	0	0	0.00883486
11052	1528.33	1	0	1	0	0	0	0.00881394
11054	1528.36	1	0	1	0	0	0	0.00884393
11056	1528.4	1	0	1	0	0	0	0.00879267
11058	1528.43	1	0	1	0	0	0	0.00881568
11060	1528.46	1	0	1	0	0	0	0.00881987
11062	1528.5	1	0	1	0	0	0	0.00880034
11064	1528.53	1	0	1	0	0	0	0.00880313
11066	1528.56	1	0	1	0	0	0	0.00879929
11068	1528.6	1	0	1	0	0	0	0.00879406
11070	1528.63	1	0	1	0	0	0	0.00877977
11072	1528.66	1	0	1	0	0	0	0.00883103
11074	1528.7	1	0	1	0	0	0	0.00882022
11076	1528.73	1	0	1	0	0	0	0.00878465
11078	1528.76	1	0	1	0	0	0	0.00881673
11080	1528.8	1	0	1	0	0	0	0.00881952
11082	1528.83	1	0	1	0	0	0	0.0087972
11084	1528.86	1	0	1	0	0	0	0.00882963
11086	1528.9	1	0	1	0	0	0	0.00882022
11088	1528.93	1	0	1	0	0	0	0.00883242
11090	1528.96	1	0	1	0	0	0	0.00879023
11092	1529	1	0	1	0	0	0	0.00880766
11094	1529.03	1	0	1	0	0	0	0.00882824
11096	1529.06	1	0	1	0	0	0	0.00883695
11098	1529.1	1	0	1	0	0	0	0.00883556
11100	1529.13	1	0	1	0	0	0	0.00883591
11102	1529.16	1	0	1	0	0	0	0.00884916
11104	1529.2	1	0	1	0	0	0	0.00882057
11106	1529.23	1	0	1	0	0	0	0.00880139
11108	1529.26	1	0	1	0	0	0	0.00879964
11110	1529.3	1	0	1	0	0	0	0.00877767
11112	1529.33	1	0	1	0	0	0	0.00879964
11114	1529.36	1	0	1	0	0	0	0.00876477
11116	1529.4	1	0	1	0	0	0	0.00879929
11118	1529.43	1	0	1	0	0	0	0.00882266
11120	1529.46	1	0	1	0	0	0	0.00881882
11122	1529.5	1	0	1	0	0	0	0.00878814
11124	1529.53	1	0	1	0	0	0	0.00877628
11126	1529.56	1	0	1	0	0	0	0.00877628
11128	1529.6	1	0	1	0	0	0	0.0087435
11130	1529.63	1	0	1	0	0	0	0.00876129
11132	1529.66	1	0	1	0	0	0	0.00882196
11134	1529.7	1	0	1	0	0	0	0.00880941
11136	1529.73	1	0	1	0	0	0	0.00882161
11138	1529.76	1	0	1	0	0	0	0.0088251
11140	1529.8	1	0	1	0	0	0	0.00877767
11142	1529.83	1	0	1	0	0	0	0.00878116
11144	1529.86	1	0	1	0	0	0	0.0088258
11146	1529.9	1	0	1	0	0	0	0.00880871
11148	1529.93	1	0	1	0	0	0	0.00886206
11150	1529.96	1	0	1	0	0	0	0.00882684
11152	1530	1	0	1	0	0	0	0.00884463
11154	1530.03	1	0	1	0	0	0	0.00884323
11156	1530.06	1	0	1	0	0	0	0.00881429
11158	1530.1	1	0	1	0	0	0	0.00884079
11160	1530.13	1	0	1	0	0	0	0.00883242
11162	1530.16	1	0	1	0	0	0	0.00881464
11164	1530.2	1	0	1	0	0	0	0.00883451
11166	1530.23	1	0	1	0	0	0	0.00882022
11168	1530.26	1	0	1	0	0	0	0.00886171
11170	1530.3	1	0	1	0	0	0	0.00879825
11172	1530.33	1	0	1	0	0	0	0.00883556
11174	1530.36	1	0	1	0	0	0	0.00882301
11176	1530.4	1	0	1	0	0	0	0.00882231
11178	1530.43	1	0	1	0	0	0	0.00885021
11180	1530.46	1	0	1	0	0	0	0.00884184
11182	1530.5	1	0	1	0	0	0	0.00879999
11184	1530.53	1	0	1	0	0	0	0.00884463
11186	1530.56	1	0	1	0	0	0	0.0088258
11188	1530.6	1	0	1	0	0	0	0.00882196
11190	1530.63	1	0	1	0	0	0	0.00887462
11192	1530.66	1	0	1	0	0	0	0.00888996
11194	1530.7	1	0	1	0	0	0	0.0088516
11196	1530.73	1	0	1	0	0	0	0.00888194
11198	1530.76	1	0	1	0	0	0	0.00890007
11200	1530.8	1	0	1	0	0	0	0.00887322
11202	1530.83	1	0	1	0	0	0	0.00884881
11204	1530.86	1	0	1	0	0	0	0.0088237
11206	1530.9	1	0	1	0	0	0	0.0088387
11208	1530.93	1	0	1	0	0	0	0.00884288
11210	1530.96	1	0	1	0	0	0	0.00885613
11212	1531	1	0	1	0	0	0	0.00888473
11214	1531.03	1	0	1	0	0	0	0.00884323
11216	1531.06	1	0	1	0	0	0	0.00884149
11218	1531.1	1	0	1	0	0	0	0.00883207
11220	1531.13	1	0	1	0	0	0	0.00885788
11222	1531.16	1	0	1	0	0	0	0.00884672
11224	1531.2	1	0	1	0	0	0	0.0088645
11226	1531.23	1	0	1	0	0	0	0.00888229
11228	1531.26	1	0	1	0	0	0	0.00887043
11230	1531.3	1	0	1	0	0	0	0.00887217
11232	1531.33	1	0	1	0	0	0	0.00886799
11234	1531.36	1	0	1	0	0	0	0.00888821
11236	1531.4	1	0	1	0	0	0	0.00885788
11238	1531.43	1	0	1	0	0	0	0.0088523
11240	1531.46	1	0	1	0	0	0	0.00887322
11242	1531.5	1	0	1	0	0	0	0.00887043
11244	1531.53	1	0	1	0	0	0	0.00889379
11246	1531.56	1	0	1	0	0	0	0.00885544
11248	1531.6	1	0	1	0	0	0	0.00887496
11250	1531.63	1	0	1	0	0	0	0.00888577
11252	1531.66	1	0	1	0	0	0	0.00889798
11254	1531.7	1	0	1	0	0	0	0.00888089
11256	1531.73	1	0	1	0	0	0	0.00888124
11258	1531.76	1	0	1	0	0	0	0.00888508
11260	1531.8	1	0	1	0	0	0	0.00887496
11262	1531.83	1	0	1	0	0	0	0.0088523
11264	1531.86	1	0	1	0	0	0	0.00886276
11266	1531.9	1	0	1	0	0	0	0.00889031
11268	1531.93	1	0	1	0	0	0	0.00883382
11270	1531.96	1	0	1	0	0	0	0.00882057
11272	1532	1	0	1	0	0	0	0.00886171
11274	1532.03	1	0	1	0	0	0	0.00884811
11276	1532.06	1	0	1	0	0	0	0.00883382
11278	1532.1	1	0	1	0	0	0	0.00882091
11280	1532.13	1	0	1	0	0	0	0.00885439
11282	1532.16	1	0	1	0	0	0	0.0088788
11284	1532.2	1	0	1	0	0	0	0.00887392
11286	1532.23	1	0	1	0	0	0	0.00886381
11288	1532.26	1	0	1	0	0	0	0.00880487
11290	1532.3	1	0	1	0	0	0	0.00883974
11292	1532.33	1	0	1	0	0	0	0.00888856
11294	1532.36	1	0	1	0	0	0	0.00882161
11296	1532.4	1	0	1	0	0	0	0.00885439
11298	1532.43	1	0	1	0	0	0	0.00887287
11300	1532.46	1	0	1	0	0	0	0.00887845
11302	1532.5	1	0	1	0	0	0	0.00885544
11304	1532.53	1	0	1	0	0	0	0.00889798
11306	1532.56	1	0	1	0	0	0	0.00886555
11308	1532.6	1	0	1	0	0	0	0.00883382
11310	1532.63	1	0	1	0	0	0	0.00882161
11312	1532.66	1	0	1	0	0	0	0.00882405
11314	1532.7	1	0	1	0	0	0	0.00886729
11316	1532.73	1	0	1	0	0	0	0.00884532
11318	1532.76	1	0	1	0	0	0	0.00886729
11320	1532.8	1	0	1	0	0	0	0.00885997
11322	1532.83	1	0	1	0	0	0	0.00880906
11324	1532.86	1	0	1	0	0	0	0.00887392
11326	1532.9	1	0	1	0	0	0	0.00881115
11328	1532.93	1	0	1	0	0	0	0.00885648
11330	1532.96	1	0	1	0	0	0	0.00883765
11332	1533	1	0	1	0	0	0	0.00886694
11334	1533.03	1	0	1	0	0	0	0.00884881
11336	1533.06	1	0	1	0	0	0	0.00883626
11338	1533.1	1	0	1	0	0	0	0.00889624
11340	1533.13	1	0	1	0	0	0	0.00888821
11342	1533.16	1	0	1	0	0	0	0.00890879
11344	1533.2	1	0	1	0	0	0	0.00887357
11346	1533.23	1	0	1	0	0	0	0.00891158
11348	1533.26	1	0	1	0	0	0	0.00886171
11350	1533.3	1	0	1	0	0	0	0.00888647
11352	1533.33	1	0	1	0	0	0	0.00887496
11354	1533.36	1	0	1	0	0	0	0.00888682
11356	1533.4	1	0	1	0	0	0	0.00887462
11358	1533.43	1	0	1	0	0	0	0.00883486
11360	1533.46	1	0	1	0	0	0	0.00882789
11362	1533.5	1	0	1	0	0	0	0.00884986
11364	1533.53	1	0	1	0	0	0	0.00885613
11366	1533.56	1	0	1	0	0	0	0.0088795
11368	1533.6	1	0	1	0	0	0	0.00889449
11370	1533.63	1	0	1	0	0	0	0.00885544
11372	1533.66	1	0	1	0	0	0	0.00884567
11374	1533.7	1	0	1	0	0	0	0.00882789
11376	1533.73	1	0	1	0	0	0	0.00886415
11378	1533.76	1	0	1	0	0	0	0.00885927
11380	1533.8	1	0	1	0	0	0	0.00885404
11382	1533.83	1	0	1	0	0	0	0.00887706
11384	1533.86	1	0	1	0	0	0	0.00885613
11386	1533.9	1	0	1	0	0	0	0.00884776
11388	1533.93	1	0	1	0	0	0	0.00886102
11390	1533.96	1	0	1	0	0	0	0.00884986
11392	1534	1	0	1	0	0	0	0.00879511
11394	1534.03	1	0	1	0	0	0	0.00885613
11396	1534.06	1	0	1	0	0	0	0.00883207
11398	1534.1	1	0	1	0	0	0	0.00880871
11400	1534.13	1	0	1	0	0	0	0.00887392
11402	1534.16	1	0	1	0	0	0	0.0088523
11404	1534.2	1	0	1	0	0	0	0.00881045
11406	1534.23	1	0	1	0	0	0	0.00884009
11408	1534.26	1	0	1	0	0	0	0.00883626
11410	1534.3	1	0	1	0	0	0	0.00884323
11412	1534.33	1	0	1	0	0	0	0.00886346
11414	1534.36	1	0	1	0	0	0	0.00881499
11416	1534.4	1	0	1	0	0	0	0.00883033
11418	1534.43	1	0	1	0	0	0	0.00879337
11420	1534.46	1	0	1	0	0	0	0.00883905
11422	1534.5	1	0	1	0	0	0	0.00880592
[truncated: 7,158 more rows]

## Sheet: Mouse 2_470 Signal
FrameCounter	Timestamp	LedState	Stimulation	Output0	Output1	Input0	Input1	Region0G
7425	1467.88	2	0	1	0	0	0	0.0122337
7427	1467.92	2	0	1	0	0	0	0.0121811
7429	1467.95	2	0	1	0	0	0	0.0122267
7431	1467.98	2	0	1	0	0	0	0.0122079
7433	1468.02	2	0	1	0	0	0	0.0122013
7435	1468.05	2	0	1	0	0	0	0.0122083
7437	1468.08	2	0	1	0	0	0	0.0122076
7439	1468.12	2	0	1	0	0	0	0.0122292
7441	1468.15	2	0	1	0	0	0	0.0122316
7443	1468.18	2	0	1	0	0	0	0.0122104
7445	1468.22	2	0	1	0	0	0	0.0121361
7447	1468.25	2	0	1	0	0	0	0.0121601
7449	1468.28	2	0	1	0	0	0	0.0120681
7451	1468.32	2	0	1	0	0	0	0.0120241
7453	1468.35	2	0	1	0	0	0	0.0120419
7455	1468.38	2	0	1	0	0	0	0.0120325
7457	1468.42	2	0	1	0	0	0	0.012021
7459	1468.45	2	0	1	0	0	0	0.0120594
7461	1468.48	2	0	1	0	0	0	0.012096
7463	1468.52	2	0	1	0	0	0	0.0120862
7465	1468.55	2	0	1	0	0	0	0.0120719
7467	1468.58	2	0	1	0	0	0	0.0120601
7469	1468.62	2	0	1	0	0	0	0.0120768
7471	1468.65	2	0	1	0	0	0	0.012036
7473	1468.68	2	0	1	0	0	0	0.012067
7475	1468.72	2	0	1	0	0	0	0.012044
7477	1468.75	2	0	1	0	0	0	0.0120527
7479	1468.78	2	0	1	0	0	0	0.012005
7481	1468.82	2	0	1	0	0	0	0.0120416
7483	1468.85	2	0	1	0	0	0	0.0119729
7485	1468.88	2	0	1	0	0	0	0.0119652
7487	1468.92	2	0	1	0	0	0	0.0119282
7489	1468.95	2	0	1	0	0	0	0.0119548
7491	1468.98	2	0	1	0	0	0	0.0119335
7493	1469.02	2	0	1	0	0	0	0.0119105
7495	1469.05	2	0	1	0	0	0	0.0119352
7497	1469.08	2	0	1	0	0	0	0.0119112
7499	1469.12	2	0	1	0	0	0	0.0118784
7501	1469.15	2	0	1	0	0	0	0.011892
7503	1469.18	2	0	1	0	0	0	0.0118529
7505	1469.22	2	0	1	0	0	0	0.0119059
7507	1469.25	2	0	1	0	0	0	0.0119108
7509	1469.28	2	0	1	0	0	0	0.0119269
7511	1469.32	2	0	1	0	0	0	0.0119802
7513	1469.35	2	0	1	0	0	0	0.0119997
7515	1469.38	2	0	1	0	0	0	0.0120011
7517	1469.42	2	0	1	0	0	0	0.0119509
7519	1469.45	2	0	1	0	0	0	0.0119921
7521	1469.48	2	0	1	0	0	0	0.0120008
7523	1469.52	2	0	1	0	0	0	0.0119331
7525	1469.55	2	0	1	0	0	0	0.0119105
7527	1469.58	2	0	1	0	0	0	0.0119011
7529	1469.62	2	0	1	0	0	0	0.0119171
7531	1469.65	2	0	1	0	0	0	0.0118651
7533	1469.68	2	0	1	0	0	0	0.0118923
7535	1469.72	2	0	1	0	0	0	0.0118833
7537	1469.75	2	0	1	0	0	0	0.0118334
7539	1469.78	2	0	1	0	0	0	0.0118568
7541	1469.82	2	0	1	0	0	0	0.0118784
7543	1469.85	2	0	1	0	0	0	0.0118362
7545	1469.88	2	0	1	0	0	0	0.0118414
7547	1469.92	2	0	1	0	0	0	0.0118658
7549	1469.95	2	0	1	0	0	0	0.0118644
7551	1469.98	2	0	1	0	0	0	0.011899
7553	1470.02	2	0	1	0	0	0	0.0118383
7555	1470.05	2	0	1	0	0	0	0.0118644
7557	1470.08	2	0	1	0	0	0	0.0118243
7559	1470.12	2	0	1	0	0	0	0.0118324
7561	1470.15	2	0	1	0	0	0	0.0118508
7563	1470.18	2	0	1	0	0	0	0.0118362
7565	1470.22	2	0	1	0	0	0	0.0118236
7567	1470.25	2	0	1	0	0	0	0.0117923
7569	1470.28	2	0	1	0	0	0	0.0117947
7571	1470.32	2	0	1	0	0	0	0.0118679
7573	1470.35	2	0	1	0	0	0	0.0118215
7575	1470.38	2	0	1	0	0	0	0.0118052
7577	1470.42	2	0	1	0	0	0	0.0118603
7579	1470.45	2	0	1	0	0	0	0.0118362
7581	1470.48	2	0	1	0	0	0	0.0118177
7583	1470.52	2	0	1	0	0	0	0.0118791
7585	1470.55	2	0	1	0	0	0	0.0118268
7587	1470.58	2	0	1	0	0	0	0.0118128
7589	1470.62	2	0	1	0	0	0	0.0117748
7591	1470.65	2	0	1	0	0	0	0.0118317
7593	1470.68	2	0	1	0	0	0	0.0117947
7595	1470.72	2	0	1	0	0	0	0.0117682
7597	1470.75	2	0	1	0	0	0	0.0118114
7599	1470.78	2	0	1	0	0	0	0.0118086
7601	1470.82	2	0	1	0	0	0	0.0117476
7603	1470.85	2	0	1	0	0	0	0.0118045
7605	1470.88	2	0	1	0	0	0	0.0118177
7607	1470.92	2	0	1	0	0	0	0.0118219
7609	1470.95	2	0	1	0	0	0	0.0118313
7611	1470.98	2	0	1	0	0	0	0.0117947
7613	1471.02	2	0	1	0	0	0	0.0118505
7615	1471.05	2	0	1	0	0	0	0.0118386
7617	1471.08	2	0	1	0	0	0	0.0118226
7619	1471.12	2	0	1	0	0	0	0.0118205
7621	1471.15	2	0	1	0	0	0	0.0118578
7623	1471.18	2	0	1	0	0	0	0.0118264
7625	1471.22	2	0	1	0	0	0	0.0117978
7627	1471.25	2	0	1	0	0	0	0.0117682
7629	1471.28	2	0	1	0	0	0	0.0117166
7631	1471.32	2	0	1	0	0	0	0.0117936
7633	1471.35	2	0	1	0	0	0	0.0117804
7635	1471.38	2	0	1	0	0	0	0.0118031
7637	1471.42	2	0	1	0	0	0	0.0117968
7639	1471.45	2	0	1	0	0	0	0.0117431
7641	1471.48	2	0	1	0	0	0	0.0118212
7643	1471.52	2	0	1	0	0	0	0.0117459
7645	1471.55	2	0	1	0	0	0	0.0117713
7647	1471.58	2	0	1	0	0	0	0.0117787
7649	1471.62	2	0	1	0	0	0	0.0117731
7651	1471.65	2	0	1	0	0	0	0.0117881
7653	1471.68	2	0	1	0	0	0	0.0117466
7655	1471.72	2	0	1	0	0	0	0.0117877
7657	1471.75	2	0	1	0	0	0	0.0117427
7659	1471.78	2	0	1	0	0	0	0.0117835
7661	1471.82	2	0	1	0	0	0	0.0117605
7663	1471.85	2	0	1	0	0	0	0.0117595
7665	1471.88	2	0	1	0	0	0	0.0117682
7667	1471.92	2	0	1	0	0	0	0.0117539
7669	1471.95	2	0	1	0	0	0	0.0117685
7671	1471.98	2	0	1	0	0	0	0.0117389
7673	1472.02	2	0	1	0	0	0	0.0117413
7675	1472.05	2	0	1	0	0	0	0.0117051
7677	1472.08	2	0	1	0	0	0	0.0117347
7679	1472.12	2	0	1	0	0	0	0.0117797
7681	1472.15	2	0	1	0	0	0	0.0117124
7683	1472.18	2	0	1	0	0	0	0.0117281
7685	1472.22	2	0	1	0	0	0	0.0117127
7687	1472.25	2	0	1	0	0	0	0.011733
7689	1472.28	2	0	1	0	0	0	0.0117121
7691	1472.32	2	0	1	0	0	0	0.0117448
7693	1472.35	2	0	1	0	0	0	0.0117675
7695	1472.38	2	0	1	0	0	0	0.0118303
7697	1472.42	2	0	1	0	0	0	0.0118177
7699	1472.45	2	0	1	0	0	0	0.0117891
7701	1472.48	2	0	1	0	0	0	0.0117766
7703	1472.52	2	0	1	0	0	0	0.0118606
7705	1472.55	2	0	1	0	0	0	0.0118013
7707	1472.58	2	0	1	0	0	0	0.0118261
7709	1472.62	2	0	1	0	0	0	0.0117982
7711	1472.65	2	0	1	0	0	0	0.0118132
7713	1472.68	2	0	1	0	0	0	0.0117773
7715	1472.72	2	0	1	0	0	0	0.0117797
7717	1472.75	2	0	1	0	0	0	0.0117748
7719	1472.78	2	0	1	0	0	0	0.0117731
7721	1472.82	2	0	1	0	0	0	0.0117508
7723	1472.85	2	0	1	0	0	0	0.0117741
7725	1472.88	2	0	1	0	0	0	0.0117926
7727	1472.92	2	0	1	0	0	0	0.0117821
7729	1472.95	2	0	1	0	0	0	0.0117839
7731	1472.98	2	0	1	0	0	0	0.0117532
7733	1473.02	2	0	1	0	0	0	0.0117584
7735	1473.05	2	0	1	0	0	0	0.0117173
7737	1473.08	2	0	1	0	0	0	0.0117253
7739	1473.12	2	0	1	0	0	0	0.0117281
7741	1473.15	2	0	1	0	0	0	0.0117448
7743	1473.18	2	0	1	0	0	0	0.0117591
7745	1473.22	2	0	1	0	0	0	0.0117298
7747	1473.25	2	0	1	0	0	0	0.01178
7749	1473.28	2	0	1	0	0	0	0.0117905
7751	1473.32	2	0	1	0	0	0	0.0117926
7753	1473.35	2	0	1	0	0	0	0.0117141
7755	1473.38	2	0	1	0	0	0	0.0117302
7757	1473.42	2	0	1	0	0	0	0.0117312
7759	1473.45	2	0	1	0	0	0	0.0117375
7761	1473.48	2	0	1	0	0	0	0.011757
7763	1473.52	2	0	1	0	0	0	0.0117515
7765	1473.55	2	0	1	0	0	0	0.01171
7767	1473.58	2	0	1	0	0	0	0.0117218
7769	1473.62	2	0	1	0	0	0	0.0117595
7771	1473.65	2	0	1	0	0	0	0.0117361
7773	1473.68	2	0	1	0	0	0	0.0117633
7775	1473.72	2	0	1	0	0	0	0.0117159
7777	1473.75	2	0	1	0	0	0	0.0117236
7779	1473.78	2	0	1	0	0	0	0.0117232
7781	1473.82	2	0	1	0	0	0	0.0117127
7783	1473.85	2	0	1	0	0	0	0.0117215
7785	1473.88	2	0	1	0	0	0	0.0116775
7787	1473.92	2	0	1	0	0	0	0.0116709
7789	1473.95	2	0	1	0	0	0	0.0116747
7791	1473.98	2	0	1	0	0	0	0.0116873
7793	1474.02	2	0	1	0	0	0	0.0116842
7795	1474.05	2	0	1	0	0	0	0.0116842
7797	1474.08	2	0	1	0	0	0	0.0117054
7799	1474.12	2	0	1	0	0	0	0.0117047
7801	1474.15	2	0	1	0	0	0	0.0116925
7803	1474.18	2	0	1	0	0	0	0.0116552
7805	1474.22	2	0	1	0	0	0	0.0116573
7807	1474.25	2	0	1	0	0	0	0.0116821
7809	1474.28	2	0	1	0	0	0	0.0116772
7811	1474.32	2	0	1	0	0	0	0.0116859
7813	1474.35	2	0	1	0	0	0	0.0116618
7815	1474.38	2	0	1	0	0	0	0.0116845
7817	1474.42	2	0	1	0	0	0	0.0116716
7819	1474.45	2	0	1	0	0	0	0.0116709
7821	1474.48	2	0	1	0	0	0	0.0116793
7823	1474.52	2	0	1	0	0	0	0.011642
7825	1474.55	2	0	1	0	0	0	0.0117309
7827	1474.58	2	0	1	0	0	0	0.0116744
7829	1474.62	2	0	1	0	0	0	0.0117183
7831	1474.65	2	0	1	0	0	0	0.0117023
7833	1474.68	2	0	1	0	0	0	0.0116688
7835	1474.72	2	0	1	0	0	0	0.0116713
7837	1474.75	2	0	1	0	0	0	0.0116859
7839	1474.78	2	0	1	0	0	0	0.0116911
7841	1474.82	2	0	1	0	0	0	0.0117005
7843	1474.85	2	0	1	0	0	0	0.01165
7845	1474.88	2	0	1	0	0	0	0.0116849
7847	1474.92	2	0	1	0	0	0	0.0117033
7849	1474.95	2	0	1	0	0	0	0.0117012
7851	1474.98	2	0	1	0	0	0	0.0117448
7853	1475.02	2	0	1	0	0	0	0.0117525
7855	1475.05	2	0	1	0	0	0	0.0117968
7857	1475.08	2	0	1	0	0	0	0.0117717
7859	1475.12	2	0	1	0	0	0	0.0117783
7861	1475.15	2	0	1	0	0	0	0.0117888
7863	1475.18	2	0	1	0	0	0	0.0117877
7865	1475.22	2	0	1	0	0	0	0.0117853
7867	1475.25	2	0	1	0	0	0	0.0117853
7869	1475.28	2	0	1	0	0	0	0.0117835
7871	1475.32	2	0	1	0	0	0	0.0117574
7873	1475.35	2	0	1	0	0	0	0.0117752
7875	1475.38	2	0	1	0	0	0	0.011771
7877	1475.42	2	0	1	0	0	0	0.011772
7879	1475.45	2	0	1	0	0	0	0.0117616
7881	1475.48	2	0	1	0	0	0	0.0117902
7883	1475.52	2	0	1	0	0	0	0.0117535
7885	1475.55	2	0	1	0	0	0	0.0117814
7887	1475.58	2	0	1	0	0	0	0.0117996
7889	1475.62	2	0	1	0	0	0	0.0118104
7891	1475.65	2	0	1	0	0	0	0.0118313
7893	1475.68	2	0	1	0	0	0	0.011817
7895	1475.72	2	0	1	0	0	0	0.0118104
7897	1475.75	2	0	1	0	0	0	0.0117651
7899	1475.78	2	0	1	0	0	0	0.0117487
7901	1475.82	2	0	1	0	0	0	0.0117305
7903	1475.85	2	0	1	0	0	0	0.0117326
7905	1475.88	2	0	1	0	0	0	0.011711
7907	1475.92	2	0	1	0	0	0	0.0116901
7909	1475.95	2	0	1	0	0	0	0.0116807
7911	1475.98	2	0	1	0	0	0	0.0116932
7913	1476.02	2	0	1	0	0	0	0.0117162
7915	1476.05	2	0	1	0	0	0	0.0116803
7917	1476.08	2	0	1	0	0	0	0.0117033
7919	1476.12	2	0	1	0	0	0	0.0116733
7921	1476.15	2	0	1	0	0	0	0.011688
7923	1476.18	2	0	1	0	0	0	0.011711
7925	1476.22	2	0	1	0	0	0	0.0116671
7927	1476.25	2	0	1	0	0	0	0.0116939
7929	1476.28	2	0	1	0	0	0	0.0117134
7931	1476.32	2	0	1	0	0	0	0.0117518
7933	1476.35	2	0	1	0	0	0	0.0117173
7935	1476.38	2	0	1	0	0	0	0.0117546
7937	1476.42	2	0	1	0	0	0	0.0117344
7939	1476.45	2	0	1	0	0	0	0.0117176
7941	1476.48	2	0	1	0	0	0	0.0117051
7943	1476.52	2	0	1	0	0	0	0.0117068
7945	1476.55	2	0	1	0	0	0	0.0117093
7947	1476.58	2	0	1	0	0	0	0.0116831
7949	1476.62	2	0	1	0	0	0	0.0116782
7951	1476.65	2	0	1	0	0	0	0.0117082
7953	1476.68	2	0	1	0	0	0	0.011659
7955	1476.72	2	0	1	0	0	0	0.0116531
7957	1476.75	2	0	1	0	0	0	0.0116514
7959	1476.78	2	0	1	0	0	0	0.0116646
7961	1476.82	2	0	1	0	0	0	0.0116873
7963	1476.85	2	0	1	0	0	0	0.011711
7965	1476.88	2	0	1	0	0	0	0.0116182
7967	1476.92	2	0	1	0	0	0	0.0116887
7969	1476.95	2	0	1	0	0	0	0.0116622
7971	1476.98	2	0	1	0	0	0	0.0116528
7973	1477.02	2	0	1	0	0	0	0.011681
7975	1477.05	2	0	1	0	0	0	0.0116681
7977	1477.08	2	0	1	0	0	0	0.0116862
7979	1477.12	2	0	1	0	0	0	0.0117107
7981	1477.15	2	0	1	0	0	0	0.011695
7983	1477.18	2	0	1	0	0	0	0.0116559
7985	1477.22	2	0	1	0	0	0	0.0116636
7987	1477.25	2	0	1	0	0	0	0.0116831
7989	1477.28	2	0	1	0	0	0	0.0116779
7991	1477.32	2	0	1	0	0	0	0.0116193
7993	1477.35	2	0	1	0	0	0	0.0116486
7995	1477.38	2	0	1	0	0	0	0.0116305
7997	1477.42	2	0	1	0	0	0	0.0116217
7999	1477.45	2	0	1	0	0	0	0.0116796
8001	1477.48	2	0	1	0	0	0	0.011658
8003	1477.52	2	0	1	0	0	0	0.0116835
8005	1477.55	2	0	1	0	0	0	0.0116817
8007	1477.58	2	0	1	0	0	0	0.011689
8009	1477.62	2	0	1	0	0	0	0.0116639
8011	1477.65	2	0	1	0	0	0	0.0116514
8013	1477.68	2	0	1	0	0	0	0.0116479
8015	1477.72	2	0	1	0	0	0	0.0116367
8017	1477.75	2	0	1	0	0	0	0.0117012
8019	1477.78	2	0	1	0	0	0	0.0116531
8021	1477.82	2	0	1	0	0	0	0.0116535
8023	1477.85	2	0	1	0	0	0	0.0116563
8025	1477.88	2	0	1	0	0	0	0.011726
8027	1477.92	2	0	1	0	0	0	0.011696
8029	1477.95	2	0	1	0	0	0	0.0117616
8031	1477.98	2	0	1	0	0	0	0.0117487
8033	1478.02	2	0	1	0	0	0	0.0117616
8035	1478.05	2	0	1	0	0	0	0.0117863
8037	1478.08	2	0	1	0	0	0	0.0117236
8039	1478.12	2	0	1	0	0	0	0.0117515
8041	1478.15	2	0	1	0	0	0	0.011763
8043	1478.18	2	0	1	0	0	0	0.0117685
8045	1478.22	2	0	1	0	0	0	0.0117567
8047	1478.25	2	0	1	0	0	0	0.0117699
8049	1478.28	2	0	1	0	0	0	0.0118097
8051	1478.32	2	0	1	0	0	0	0.011786
8053	1478.35	2	0	1	0	0	0	0.0117745
8055	1478.38	2	0	1	0	0	0	0.0117703
8057	1478.42	2	0	1	0	0	0	0.0117522
8059	1478.45	2	0	1	0	0	0	0.0117372
8061	1478.48	2	0	1	0	0	0	0.0117724
8063	1478.52	2	0	1	0	0	0	0.0117399
8065	1478.55	2	0	1	0	0	0	0.0117748
8067	1478.58	2	0	1	0	0	0	0.0117337
8069	1478.62	2	0	1	0	0	0	0.0117431
8071	1478.65	2	0	1	0	0	0	0.0117295
8073	1478.68	2	0	1	0	0	0	0.0117867
8075	1478.72	2	0	1	0	0	0	0.0117542
8077	1478.75	2	0	1	0	0	0	0.0117386
8079	1478.78	2	0	1	0	0	0	0.0117745
8081	1478.82	2	0	1	0	0	0	0.0117528
8083	1478.85	2	0	1	0	0	0	0.0117427
8085	1478.88	2	0	1	0	0	0	0.0118153
8087	1478.92	2	0	1	0	0	0	0.0118086
8089	1478.95	2	0	1	0	0	0	0.0117954
8091	1478.98	2	0	1	0	0	0	0.0117895
8093	1479.02	2	0	1	0	0	0	0.0117406
8095	1479.05	2	0	1	0	0	0	0.0117773
8097	1479.08	2	0	1	0	0	0	0.0117347
8099	1479.12	2	0	1	0	0	0	0.0117183
8101	1479.15	2	0	1	0	0	0	0.011718
8103	1479.18	2	0	1	0	0	0	0.0117103
8105	1479.22	2	0	1	0	0	0	0.0117107
8107	1479.25	2	0	1	0	0	0	0.0117246
8109	1479.28	2	0	1	0	0	0	0.0117246
8111	1479.32	2	0	1	0	0	0	0.0117169
8113	1479.35	2	0	1	0	0	0	0.0117162
8115	1479.38	2	0	1	0	0	0	0.011696
8117	1479.42	2	0	1	0	0	0	0.0117134
8119	1479.45	2	0	1	0	0	0	0.0117396
8121	1479.48	2	0	1	0	0	0	0.0117515
8123	1479.52	2	0	1	0	0	0	0.0117895
8125	1479.55	2	0	1	0	0	0	0.0117926
8127	1479.58	2	0	1	0	0	0	0.0117741
8129	1479.62	2	0	1	0	0	0	0.0118006
8131	1479.65	2	0	1	0	0	0	0.0117971
8133	1479.68	2	0	1	0	0	0	0.0117926
8135	1479.72	2	0	1	0	0	0	0.0117595
8137	1479.75	2	0	1	0	0	0	0.0118006
8139	1479.78	2	0	1	0	0	0	0.0117849
8141	1479.82	2	0	1	0	0	0	0.0117919
8143	1479.85	2	0	1	0	0	0	0.0117783
8145	1479.88	2	0	1	0	0	0	0.0117511
8147	1479.92	2	0	1	0	0	0	0.0117365
8149	1479.95	2	0	1	0	0	0	0.0117372
8151	1479.98	2	0	1	0	0	0	0.0117037
8153	1480.02	2	0	1	0	0	0	0.0117518
8155	1480.05	2	0	1	0	0	0	0.0117107
8157	1480.08	2	0	1	0	0	0	0.0117535
8159	1480.12	2	0	1	0	0	0	0.0117061
8161	1480.15	2	0	1	0	0	0	0.0117072
8163	1480.18	2	0	1	0	0	0	0.0117141
8165	1480.22	2	0	1	0	0	0	0.0117208
8167	1480.25	2	0	1	0	0	0	0.0117811
8169	1480.28	2	0	1	0	0	0	0.0117591
8171	1480.32	2	0	1	0	0	0	0.0117396
8173	1480.35	2	0	1	0	0	0	0.011771
8175	1480.38	2	0	1	0	0	0	0.0117305
8177	1480.42	2	0	1	0	0	0	0.0117685
8179	1480.45	2	0	1	0	0	0	0.0117818
8181	1480.48	2	0	1	0	0	0	0.011771
8183	1480.52	2	0	1	0	0	0	0.0117696
8185	1480.55	2	0	1	0	0	0	0.011794
8187	1480.58	2	0	1	0	0	0	0.0117797
8189	1480.62	2	0	1	0	0	0	0.0117658
8191	1480.65	2	0	1	0	0	0	0.0117933
8193	1480.68	2	0	1	0	0	0	0.011786
8195	1480.72	2	0	1	0	0	0	0.0117452
8197	1480.75	2	0	1	0	0	0	0.0117361
8199	1480.78	2	0	1	0	0	0	0.0117574
8201	1480.82	2	0	1	0	0	0	0.0117263
8203	1480.85	2	0	1	0	0	0	0.0117504
8205	1480.88	2	0	1	0	0	0	0.0117047
8207	1480.92	2	0	1	0	0	0	0.0116991
8209	1480.95	2	0	1	0	0	0	0.0116894
8211	1480.98	2	0	1	0	0	0	0.0117176
8213	1481.02	2	0	1	0	0	0	0.0116531
8215	1481.05	2	0	1	0	0	0	0.0116974
8217	1481.08	2	0	1	0	0	0	0.0116653
8219	1481.12	2	0	1	0	0	0	0.0116758
8221	1481.15	2	0	1	0	0	0	0.0116088
8223	1481.18	2	0	1	0	0	0	0.0116109
8225	1481.22	2	0	1	0	0	0	0.0115781
8227	1481.25	2	0	1	0	0	0	0.0116172
8229	1481.28	2	0	1	0	0	0	0.0115956
8231	1481.32	2	0	1	0	0	0	0.0116392
8233	1481.35	2	0	1	0	0	0	0.0115792
8235	1481.38	2	0	1	0	0	0	0.011591
8237	1481.42	2	0	1	0	0	0	0.0116409
8239	1481.45	2	0	1	0	0	0	0.0115987
8241	1481.48	2	0	1	0	0	0	0.0116046
8243	1481.52	2	0	1	0	0	0	0.011657
8245	1481.55	2	0	1	0	0	0	0.0116315
8247	1481.58	2	0	1	0	0	0	0.0116015
8249	1481.62	2	0	1	0	0	0	0.0115963
8251	1481.65	2	0	1	0	0	0	0.0115733
8253	1481.68	2	0	1	0	0	0	0.0115701
8255	1481.72	2	0	1	0	0	0	0.0115304
8257	1481.75	2	0	1	0	0	0	0.0115248
8259	1481.78	2	0	1	0	0	0	0.0115855
8261	1481.82	2	0	1	0	0	0	0.0115206
8263	1481.85	2	0	1	0	0	0	0.0115548
8265	1481.88	2	0	1	0	0	0	0.0115572
8267	1481.92	2	0	1	0	0	0	0.0115883
8269	1481.95	2	0	1	0	0	0	0.0115614
8271	1481.98	2	0	1	0	0	0	0.0115496
8273	1482.02	2	0	1	0	0	0	0.0115318
8275	1482.05	2	0	1	0	0	0	0.0116364
8277	1482.08	2	0	1	0	0	0	0.0115719
8279	1482.12	2	0	1	0	0	0	0.0115781
8281	1482.15	2	0	1	0	0	0	0.0115802
8283	1482.18	2	0	1	0	0	0	0.011613
8285	1482.22	2	0	1	0	0	0	0.011613
8287	1482.25	2	0	1	0	0	0	0.0116597
8289	1482.28	2	0	1	0	0	0	0.0116434
8291	1482.32	2	0	1	0	0	0	0.0116524
8293	1482.35	2	0	1	0	0	0	0.0117009
8295	1482.38	2	0	1	0	0	0	0.0116542
8297	1482.42	2	0	1	0	0	0	0.0116716
8299	1482.45	2	0	1	0	0	0	0.0116332
8301	1482.48	2	0	1	0	0	0	0.0116308
8303	1482.52	2	0	1	0	0	0	0.0116444
8305	1482.55	2	0	1	0	0	0	0.011605
8307	1482.58	2	0	1	0	0	0	0.0116772
8309	1482.62	2	0	1	0	0	0	0.011681
8311	1482.65	2	0	1	0	0	0	0.0116019
8313	1482.68	2	0	1	0	0	0	0.0116577
8315	1482.72	2	0	1	0	0	0	0.0116779
8317	1482.75	2	0	1	0	0	0	0.0117288
8319	1482.78	2	0	1	0	0	0	0.011681
8321	1482.82	2	0	1	0	0	0	0.0116929
8323	1482.85	2	0	1	0	0	0	0.0116897
8325	1482.88	2	0	1	0	0	0	0.0117483
8327	1482.92	2	0	1	0	0	0	0.011742
8329	1482.95	2	0	1	0	0	0	0.0118428
8331	1482.98	2	0	1	0	0	0	0.0118341
8333	1483.02	2	0	1	0	0	0	0.0118463
8335	1483.05	2	0	1	0	0	0	0.0118589
8337	1483.08	2	0	1	0	0	0	0.0118854
8339	1483.12	2	0	1	0	0	0	0.0118714
8341	1483.15	2	0	1	0	0	0	0.0118714
8343	1483.18	2	0	1	0	0	0	0.0119049
8345	1483.22	2	0	1	0	0	0	0.0118895
8347	1483.25	2	0	1	0	0	0	0.0118948
8349	1483.28	2	0	1	0	0	0	0.0118819
8351	1483.32	2	0	1	0	0	0	0.0118899
8353	1483.35	2	0	1	0	0	0	0.0119
8355	1483.38	2	0	1	0	0	0	0.0118655
8357	1483.42	2	0	1	0	0	0	0.011899
8359	1483.45	2	0	1	0	0	0	0.0119276
8361	1483.48	2	0	1	0	0	0	0.0119551
8363	1483.52	2	0	1	0	0	0	0.0120168
8365	1483.55	2	0	1	0	0	0	0.0120207
8367	1483.58	2	0	1	0	0	0	0.0120524
8369	1483.62	2	0	1	0	0	0	0.0120336
8371	1483.65	2	0	1	0	0	0	0.0120726
8373	1483.68	2	0	1	0	0	0	0.0120838
8375	1483.72	2	0	1	0	0	0	0.0120531
8377	1483.75	2	0	1	0	0	0	0.0120761
8379	1483.78	2	0	1	0	0	0	0.0120555
8381	1483.82	2	0	1	0	0	0	0.0120632
8383	1483.85	2	0	1	0	0	0	0.0120681
8385	1483.88	2	0	1	0	0	0	0.0120597
8387	1483.92	2	0	1	0	0	0	0.0120688
8389	1483.95	2	0	1	0	0	0	0.0120269
8391	1483.98	2	0	1	0	0	0	0.0119997
8393	1484.02	2	0	1	0	0	0	0.0119251
8395	1484.05	2	0	1	0	0	0	0.0119112
8397	1484.08	2	0	1	0	0	0	0.0119188
8399	1484.12	2	0	1	0	0	0	0.0119523
8401	1484.15	2	0	1	0	0	0	0.0119478
8403	1484.18	2	0	1	0	0	0	0.0118623
8405	1484.22	2	0	1	0	0	0	0.0118979
8407	1484.25	2	0	1	0	0	0	0.0118606
8409	1484.28	2	0	1	0	0	0	0.0118861
8411	1484.32	2	0	1	0	0	0	0.0118324
8413	1484.35	2	0	1	0	0	0	0.0118418
8415	1484.38	2	0	1	0	0	0	0.0118752
8417	1484.42	2	0	1	0	0	0	0.0118414
8419	1484.45	2	0	1	0	0	0	0.0118536
8421	1484.48	2	0	1	0	0	0	0.0118264
8423	1484.52	2	0	1	0	0	0	0.011855
8425	1484.55	2	0	1	0	0	0	0.0118083
8427	1484.58	2	0	1	0	0	0	0.0118965
8429	1484.62	2	0	1	0	0	0	0.0118732
8431	1484.65	2	0	1	0	0	0	0.0118121
8433	1484.68	2	0	1	0	0	0	0.0118582
8435	1484.72	2	0	1	0	0	0	0.0118683
8437	1484.75	2	0	1	0	0	0	0.0118418
8439	1484.78	2	0	1	0	0	0	0.0118261
8441	1484.82	2	0	1	0	0	0	0.0118372
8443	1484.85	2	0	1	0	0	0	0.011839
8445	1484.88	2	0	1	0	0	0	0.0118296
8447	1484.92	2	0	1	0	0	0	0.0118229
8449	1484.95	2	0	1	0	0	0	0.0118086
8451	1484.98	2	0	1	0	0	0	0.0118202
8453	1485.02	2	0	1	0	0	0	0.0117839
8455	1485.05	2	0	1	0	0	0	0.0117982
8457	1485.08	2	0	1	0	0	0	0.0117964
8459	1485.12	2	0	1	0	0	0	0.0117863
8461	1485.15	2	0	1	0	0	0	0.0117452
8463	1485.18	2	0	1	0	0	0	0.0117762
8465	1485.22	2	0	1	0	0	0	0.0118229
8467	1485.25	2	0	1	0	0	0	0.0117508
8469	1485.28	2	0	1	0	0	0	0.0117319
8471	1485.32	2	0	1	0	0	0	0.0117776
8473	1485.35	2	0	1	0	0	0	0.0117741
8475	1485.38	2	0	1	0	0	0	0.0117612
8477	1485.42	2	0	1	0	0	0	0.0117633
8479	1485.45	2	0	1	0	0	0	0.0117358
8481	1485.48	2	0	1	0	0	0	0.0117201
8483	1485.52	2	0	1	0	0	0	0.011727
8485	1485.55	2	0	1	0	0	0	0.0116855
8487	1485.58	2	0	1	0	0	0	0.0117072
8489	1485.62	2	0	1	0	0	0	0.0116754
8491	1485.65	2	0	1	0	0	0	0.0116618
8493	1485.68	2	0	1	0	0	0	0.0116744
8495	1485.72	2	0	1	0	0	0	0.0116824
8497	1485.75	2	0	1	0	0	0	0.0116751
8499	1485.78	2	0	1	0	0	0	0.0117267
8501	1485.82	2	0	1	0	0	0	0.0116259
8503	1485.85	2	0	1	0	0	0	0.0116632
8505	1485.88	2	0	1	0	0	0	0.0116608
8507	1485.92	2	0	1	0	0	0	0.0116514
8509	1485.95	2	0	1	0	0	0	0.011659
8511	1485.98	2	0	1	0	0	0	0.0116085
8513	1486.02	2	0	1	0	0	0	0.0116416
8515	1486.05	2	0	1	0	0	0	0.0115858
8517	1486.08	2	0	1	0	0	0	0.0116182
8519	1486.12	2	0	1	0	0	0	0.0115994
8521	1486.15	2	0	1	0	0	0	0.0115855
8523	1486.18	2	0	1	0	0	0	0.0115684
8525	1486.22	2	0	1	0	0	0	0.0116468
8527	1486.25	2	0	1	0	0	0	0.0115959
8529	1486.28	2	0	1	0	0	0	0.0116284
8531	1486.32	2	0	1	0	0	0	0.0116531
8533	1486.35	2	0	1	0	0	0	0.011696
8535	1486.38	2	0	1	0	0	0	0.0117005
8537	1486.42	2	0	1	0	0	0	0.0116936
8539	1486.45	2	0	1	0	0	0	0.0117246
8541	1486.48	2	0	1	0	0	0	0.0117284
8543	1486.52	2	0	1	0	0	0	0.0116932
8545	1486.55	2	0	1	0	0	0	0.0117358
8547	1486.58	2	0	1	0	0	0	0.0117159
8549	1486.62	2	0	1	0	0	0	0.0116786
8551	1486.65	2	0	1	0	0	0	0.0116936
8553	1486.68	2	0	1	0	0	0	0.0116709
8555	1486.72	2	0	1	0	0	0	0.0116482
8557	1486.75	2	0	1	0	0	0	0.0116765
8559	1486.78	2	0	1	0	0	0	0.0116594
8561	1486.82	2	0	1	0	0	0	0.0116939
8563	1486.85	2	0	1	0	0	0	0.0116765
8565	1486.88	2	0	1	0	0	0	0.0116594
8567	1486.92	2	0	1	0	0	0	0.011673
8569	1486.95	2	0	1	0	0	0	0.0116821
8571	1486.98	2	0	1	0	0	0	0.0116897
8573	1487.02	2	0	1	0	0	0	0.0116706
8575	1487.05	2	0	1	0	0	0	0.0116538
8577	1487.08	2	0	1	0	0	0	0.011674
8579	1487.12	2	0	1	0	0	0	0.0116577
8581	1487.15	2	0	1	0	0	0	0.0116563
8583	1487.18	2	0	1	0	0	0	0.0116315
8585	1487.22	2	0	1	0	0	0	0.0116831
8587	1487.25	2	0	1	0	0	0	0.0116346
8589	1487.28	2	0	1	0	0	0	0.0116381
8591	1487.32	2	0	1	0	0	0	0.0116078
8593	1487.35	2	0	1	0	0	0	0.0116402
8595	1487.38	2	0	1	0	0	0	0.0115754
8597	1487.42	2	0	1	0	0	0	0.011612
8599	1487.45	2	0	1	0	0	0	0.0116176
8601	1487.48	2	0	1	0	0	0	0.0116176
8603	1487.52	2	0	1	0	0	0	0.0116312
8605	1487.55	2	0	1	0	0	0	0.0116155
8607	1487.58	2	0	1	0	0	0	0.0115701
8609	1487.62	2	0	1	0	0	0	0.0115924
8611	1487.65	2	0	1	0	0	0	0.0115754
8613	1487.68	2	0	1	0	0	0	0.0115855
8615	1487.72	2	0	1	0	0	0	0.0115998
8617	1487.75	2	0	1	0	0	0	0.011635
8619	1487.78	2	0	1	0	0	0	0.0116182
8621	1487.82	2	0	1	0	0	0	0.0115639
8623	1487.85	2	0	1	0	0	0	0.0116549
8625	1487.88	2	0	1	0	0	0	0.0116298
8627	1487.92	2	0	1	0	0	0	0.0116308
8629	1487.95	2	0	1	0	0	0	0.0115806
8631	1487.98	2	0	1	0	0	0	0.0115834
8633	1488.02	2	0	1	0	0	0	0.0115792
8635	1488.05	2	0	1	0	0	0	0.0115747
8637	1488.08	2	0	1	0	0	0	0.0115792
8639	1488.12	2	0	1	0	0	0	0.0115705
8641	1488.15	2	0	1	0	0	0	0.0115541
8643	1488.18	2	0	1	0	0	0	0.0115405
8645	1488.22	2	0	1	0	0	0	0.0115248
8647	1488.25	2	0	1	0	0	0	0.0114972
8649	1488.28	2	0	1	0	0	0	0.0115
8651	1488.32	2	0	1	0	0	0	0.0115046
8653	1488.35	2	0	1	0	0	0	0.0115398
8655	1488.38	2	0	1	0	0	0	0.011538
8657	1488.42	2	0	1	0	0	0	0.0115931
8659	1488.45	2	0	1	0	0	0	0.0116162
8661	1488.48	2	0	1	0	0	0	0.0115952
8663	1488.52	2	0	1	0	0	0	0.0115872
8665	1488.55	2	0	1	0	0	0	0.0116176
8667	1488.58	2	0	1	0	0	0	0.0116165
8669	1488.62	2	0	1	0	0	0	0.0115869
8671	1488.65	2	0	1	0	0	0	0.0116026
8673	1488.68	2	0	1	0	0	0	0.0116092
8675	1488.72	2	0	1	0	0	0	0.0115872
8677	1488.75	2	0	1	0	0	0	0.0116134
8679	1488.78	2	0	1	0	0	0	0.0116148
8681	1488.82	2	0	1	0	0	0	0.0116312
8683	1488.85	2	0	1	0	0	0	0.0116186
8685	1488.88	2	0	1	0	0	0	0.0116409
8687	1488.92	2	0	1	0	0	0	0.0116221
8689	1488.95	2	0	1	0	0	0	0.0115938
8691	1488.98	2	0	1	0	0	0	0.0115781
8693	1489.02	2	0	1	0	0	0	0.0116287
8695	1489.05	2	0	1	0	0	0	0.0115858
8697	1489.08	2	0	1	0	0	0	0.011589
8699	1489.12	2	0	1	0	0	0	0.0115558
8701	1489.15	2	0	1	0	0	0	0.0116162
8703	1489.18	2	0	1	0	0	0	0.0115945
8705	1489.22	2	0	1	0	0	0	0.0115959
8707	1489.25	2	0	1	0	0	0	0.0115977
8709	1489.28	2	0	1	0	0	0	0.011666
8711	1489.32	2	0	1	0	0	0	0.0116493
8713	1489.35	2	0	1	0	0	0	0.0116033
8715	1489.38	2	0	1	0	0	0	0.0115893
8717	1489.42	2	0	1	0	0	0	0.0115921
8719	1489.45	2	0	1	0	0	0	0.0116214
8721	1489.48	2	0	1	0	0	0	0.011627
8723	1489.52	2	0	1	0	0	0	0.0115642
8725	1489.55	2	0	1	0	0	0	0.0116413
8727	1489.58	2	0	1	0	0	0	0.0116252
8729	1489.62	2	0	1	0	0	0	0.0115897
8731	1489.65	2	0	1	0	0	0	0.0115931
8733	1489.68	2	0	1	0	0	0	0.0115924
8735	1489.72	2	0	1	0	0	0	0.0115942
8737	1489.75	2	0	1	0	0	0	0.0116001
8739	1489.78	2	0	1	0	0	0	0.0115551
8741	1489.82	2	0	1	0	0	0	0.0115485
8743	1489.85	2	0	1	0	0	0	0.0115461
8745	1489.88	2	0	1	0	0	0	0.0115161
8747	1489.92	2	0	1	0	0	0	0.0115649
8749	1489.95	2	0	1	0	0	0	0.0115862
8751	1489.98	2	0	1	0	0	0	0.0115659
8753	1490.02	2	0	1	0	0	0	0.0116012
8755	1490.05	2	0	1	0	0	0	0.0115645
8757	1490.08	2	0	1	0	0	0	0.0115921
8759	1490.12	2	0	1	0	0	0	0.0115464
8761	1490.15	2	0	1	0	0	0	0.0115708
8763	1490.18	2	0	1	0	0	0	0.0115823
8765	1490.22	2	0	1	0	0	0	0.0116109
8767	1490.25	2	0	1	0	0	0	0.0115987
8769	1490.28	2	0	1	0	0	0	0.0115862
8771	1490.32	2	0	1	0	0	0	0.011591
8773	1490.35	2	0	1	0	0	0	0.0115851
8775	1490.38	2	0	1	0	0	0	0.0115604
8777	1490.42	2	0	1	0	0	0	0.0115611
8779	1490.45	2	0	1	0	0	0	0.01165
8781	1490.48	2	0	1	0	0	0	0.0116444
8783	1490.52	2	0	1	0	0	0	0.0116988
8785	1490.55	2	0	1	0	0	0	0.0116946
8787	1490.58	2	0	1	0	0	0	0.0116964
8789	1490.62	2	0	1	0	0	0	0.0117159
8791	1490.65	2	0	1	0	0	0	0.0116932
8793	1490.68	2	0	1	0	0	0	0.0117399
8795	1490.72	2	0	1	0	0	0	0.0117473
8797	1490.75	2	0	1	0	0	0	0.011719
8799	1490.78	2	0	1	0	0	0	0.0117281
8801	1490.82	2	0	1	0	0	0	0.0116604
8803	1490.85	2	0	1	0	0	0	0.0117012
8805	1490.88	2	0	1	0	0	0	0.0116925
8807	1490.92	2	0	1	0	0	0	0.0116998
8809	1490.95	2	0	1	0	0	0	0.0116831
8811	1490.98	2	0	1	0	0	0	0.0117159
8813	1491.02	2	0	1	0	0	0	0.0116904
8815	1491.05	2	0	1	0	0	0	0.0117351
8817	1491.08	2	0	1	0	0	0	0.0117232
8819	1491.12	2	0	1	0	0	0	0.0117302
8821	1491.15	2	0	1	0	0	0	0.0116831
8823	1491.18	2	0	1	0	0	0	0.01168
8825	1491.22	2	0	1	0	0	0	0.0117148
8827	1491.25	2	0	1	0	0	0	0.011659
8829	1491.28	2	0	1	0	0	0	0.0116692
8831	1491.32	2	0	1	0	0	0	0.0116325
8833	1491.35	2	0	1	0	0	0	0.0116681
8835	1491.38	2	0	1	0	0	0	0.0116831
8837	1491.42	2	0	1	0	0	0	0.0116486
8839	1491.45	2	0	1	0	0	0	0.011665
8841	1491.48	2	0	1	0	0	0	0.0116828
8843	1491.52	2	0	1	0	0	0	0.0117141
8845	1491.55	2	0	1	0	0	0	0.0116866
8847	1491.58	2	0	1	0	0	0	0.0117131
8849	1491.62	2	0	1	0	0	0	0.0117127
8851	1491.65	2	0	1	0	0	0	0.0116957
8853	1491.68	2	0	1	0	0	0	0.0117047
8855	1491.72	2	0	1	0	0	0	0.0117658
8857	1491.75	2	0	1	0	0	0	0.0117361
8859	1491.78	2	0	1	0	0	0	0.011725
8861	1491.82	2	0	1	0	0	0	0.0118107
8863	1491.85	2	0	1	0	0	0	0.0117776
8865	1491.88	2	0	1	0	0	0	0.0117539
8867	1491.92	2	0	1	0	0	0	0.0117574
8869	1491.95	2	0	1	0	0	0	0.01171
8871	1491.98	2	0	1	0	0	0	0.0117713
8873	1492.02	2	0	1	0	0	0	0.011741
8875	1492.05	2	0	1	0	0	0	0.0117302
8877	1492.08	2	0	1	0	0	0	0.0116713
8879	1492.12	2	0	1	0	0	0	0.0116995
8881	1492.15	2	0	1	0	0	0	0.011666
8883	1492.18	2	0	1	0	0	0	0.0116081
8885	1492.21	2	0	1	0	0	0	0.0116887
8887	1492.25	2	0	1	0	0	0	0.0116371
8889	1492.28	2	0	1	0	0	0	0.0116388
8891	1492.31	2	0	1	0	0	0	0.0117539
8893	1492.35	2	0	1	0	0	0	0.0117773
8895	1492.38	2	0	1	0	0	0	0.0117713
8897	1492.41	2	0	1	0	0	0	0.0118132
8899	1492.45	2	0	1	0	0	0	0.0117734
8901	1492.48	2	0	1	0	0	0	0.0117776
8903	1492.51	2	0	1	0	0	0	0.0117413
8905	1492.55	2	0	1	0	0	0	0.0117215
8907	1492.58	2	0	1	0	0	0	0.0117012
8909	1492.61	2	0	1	0	0	0	0.0117155
8911	1492.65	2	0	1	0	0	0	0.0117201
8913	1492.68	2	0	1	0	0	0	0.0117616
8915	1492.71	2	0	1	0	0	0	0.0117379
8917	1492.75	2	0	1	0	0	0	0.0117926
8919	1492.78	2	0	1	0	0	0	0.0118118
8921	1492.81	2	0	1	0	0	0	0.011809
8923	1492.85	2	0	1	0	0	0	0.0118564
8925	1492.88	2	0	1	0	0	0	0.011794
8927	1492.91	2	0	1	0	0	0	0.0117776
8929	1492.95	2	0	1	0	0	0	0.0117902
8931	1492.98	2	0	1	0	0	0	0.0118041
8933	1493.01	2	0	1	0	0	0	0.0117943
8935	1493.05	2	0	1	0	0	0	0.0117734
8937	1493.08	2	0	1	0	0	0	0.0118275
8939	1493.11	2	0	1	0	0	0	0.0118079
8941	1493.15	2	0	1	0	0	0	0.0117658
8943	1493.18	2	0	1	0	0	0	0.0117835
8945	1493.21	2	0	1	0	0	0	0.011778
8947	1493.25	2	0	1	0	0	0	0.0117776
8949	1493.28	2	0	1	0	0	0	0.0117678
8951	1493.31	2	0	1	0	0	0	0.0117445
8953	1493.35	2	0	1	0	0	0	0.0117337
8955	1493.38	2	0	1	0	0	0	0.0117487
8957	1493.41	2	0	1	0	0	0	0.0117246
8959	1493.45	2	0	1	0	0	0	0.0117047
8961	1493.48	2	0	1	0	0	0	0.0117295
8963	1493.51	2	0	1	0	0	0	0.0117103
8965	1493.55	2	0	1	0	0	0	0.0117127
8967	1493.58	2	0	1	0	0	0	0.0116964
8969	1493.61	2	0	1	0	0	0	0.0117131
8971	1493.65	2	0	1	0	0	0	0.0116545
8973	1493.68	2	0	1	0	0	0	0.0117724
8975	1493.71	2	0	1	0	0	0	0.0117766
8977	1493.75	2	0	1	0	0	0	0.0117724
8979	1493.78	2	0	1	0	0	0	0.0117769
8981	1493.81	2	0	1	0	0	0	0.0117678
8983	1493.85	2	0	1	0	0	0	0.0117989
8985	1493.88	2	0	1	0	0	0	0.0118236
8987	1493.91	2	0	1	0	0	0	0.0118083
8989	1493.95	2	0	1	0	0	0	0.0118233
8991	1493.98	2	0	1	0	0	0	0.0117748
8993	1494.01	2	0	1	0	0	0	0.0118072
8995	1494.05	2	0	1	0	0	0	0.0118275
8997	1494.08	2	0	1	0	0	0	0.0118613
8999	1494.11	2	0	1	0	0	0	0.0118324
9001	1494.15	2	0	1	0	0	0	0.0118167
9003	1494.18	2	0	1	0	0	0	0.0117936
9005	1494.21	2	0	1	0	0	0	0.0117853
9007	1494.25	2	0	1	0	0	0	0.0118177
9009	1494.28	2	0	1	0	0	0	0.0117379
9011	1494.31	2	0	1	0	0	0	0.0117891
9013	1494.35	2	0	1	0	0	0	0.0117992
9015	1494.38	2	0	1	0	0	0	0.0117347
9017	1494.41	2	0	1	0	0	0	0.0117699
9019	1494.45	2	0	1	0	0	0	0.0117535
9021	1494.48	2	0	1	0	0	0	0.0117675
9023	1494.51	2	0	1	0	0	0	0.0117459
9025	1494.55	2	0	1	0	0	0	0.0117574
9027	1494.58	2	0	1	0	0	0	0.0117724
9029	1494.61	2	0	1	0	0	0	0.0117748
9031	1494.65	2	0	1	0	0	0	0.0117964
9033	1494.68	2	0	1	0	0	0	0.011795
9035	1494.71	2	0	1	0	0	0	0.0118149
9037	1494.75	2	0	1	0	0	0	0.0118006
9039	1494.78	2	0	1	0	0	0	0.0118411
9041	1494.81	2	0	1	0	0	0	0.0118386
9043	1494.85	2	0	1	0	0	0	0.0118603
9045	1494.88	2	0	1	0	0	0	0.0118463
9047	1494.91	2	0	1	0	0	0	0.0118327
9049	1494.95	2	0	1	0	0	0	0.0118306
9051	1494.98	2	0	1	0	0	0	0.0118191
9053	1495.01	2	0	1	0	0	0	0.011839
9055	1495.05	2	0	1	0	0	0	0.0117884
9057	1495.08	2	0	1	0	0	0	0.0118714
9059	1495.11	2	0	1	0	0	0	0.011809
9061	1495.15	2	0	1	0	0	0	0.0118331
9063	1495.18	2	0	1	0	0	0	0.0118195
9065	1495.21	2	0	1	0	0	0	0.0118285
9067	1495.25	2	0	1	0	0	0	0.0118766
9069	1495.28	2	0	1	0	0	0	0.0118854
9071	1495.31	2	0	1	0	0	0	0.0119049
9073	1495.35	2	0	1	0	0	0	0.0118707
9075	1495.38	2	0	1	0	0	0	0.0119227
9077	1495.41	2	0	1	0	0	0	0.0119757
9079	1495.45	2	0	1	0	0	0	0.0119774
9081	1495.48	2	0	1	0	0	0	0.0119767
9083	1495.51	2	0	1	0	0	0	0.0119844
9085	1495.55	2	0	1	0	0	0	0.0120325
9087	1495.58	2	0	1	0	0	0	0.0119802
9089	1495.61	2	0	1	0	0	0	0.0119924
9091	1495.65	2	0	1	0	0	0	0.012013
9093	1495.68	2	0	1	0	0	0	0.0120116
9095	1495.71	2	0	1	0	0	0	0.0120071
9097	1495.75	2	0	1	0	0	0	0.0120329
9099	1495.78	2	0	1	0	0	0	0.0119593
9101	1495.81	2	0	1	0	0	0	0.0119795
9103	1495.85	2	0	1	0	0	0	0.0120095
9105	1495.88	2	0	1	0	0	0	0.0120831
9107	1495.91	2	0	1	0	0	0	0.0120716
9109	1495.95	2	0	1	0	0	0	0.0120695
9111	1495.98	2	0	1	0	0	0	0.0121218
9113	1496.01	2	0	1	0	0	0	0.0121298
9115	1496.05	2	0	1	0	0	0	0.0121396
9117	1496.08	2	0	1	0	0	0	0.0122124
9119	1496.11	2	0	1	0	0	0	0.0121821
9121	1496.15	2	0	1	0	0	0	0.0122069
9123	1496.18	2	0	1	0	0	0	0.0122145
9125	1496.21	2	0	1	0	0	0	0.0121995
9127	1496.25	2	0	1	0	0	0	0.012233
9129	1496.28	2	0	1	0	0	0	0.0122525
9131	1496.31	2	0	1	0	0	0	0.0122839
9133	1496.35	2	0	1	0	0	0	0.0122208
9135	1496.38	2	0	1	0	0	0	0.0122616
9137	1496.41	2	0	1	0	0	0	0.0122358
9139	1496.45	2	0	1	0	0	0	0.0123153
9141	1496.48	2	0	1	0	0	0	0.0123484
9143	1496.51	2	0	1	0	0	0	0.0123575
9145	1496.55	2	0	1	0	0	0	0.0123847
9147	1496.58	2	0	1	0	0	0	0.0123941
9149	1496.61	2	0	1	0	0	0	0.012437
9151	1496.65	2	0	1	0	0	0	0.0124548
9153	1496.68	2	0	1	0	0	0	0.0124684
9155	1496.71	2	0	1	0	0	0	0.0124628
9157	1496.75	2	0	1	0	0	0	0.0124443
9159	1496.78	2	0	1	0	0	0	0.0124569
9161	1496.81	2	0	1	0	0	0	0.0124238
9163	1496.85	2	0	1	0	0	0	0.0123969
9165	1496.88	2	0	1	0	0	0	0.0123586
9167	1496.91	2	0	1	0	0	0	0.0124266
9169	1496.95	2	0	1	0	0	0	0.0123941
9171	1496.98	2	0	1	0	0	0	0.0123401
9173	1497.01	2	0	1	0	0	0	0.0123631
9175	1497.05	2	0	1	0	0	0	0.012324
9177	1497.08	2	0	1	0	0	0	0.0123296
9179	1497.11	2	0	1	0	0	0	0.0123411
9181	1497.15	2	0	1	0	0	0	0.0123429
9183	1497.18	2	0	1	0	0	0	0.0122871
9185	1497.21	2	0	1	0	0	0	0.0122811
9187	1497.25	2	0	1	0	0	0	0.0122689
9189	1497.28	2	0	1	0	0	0	0.0123094
9191	1497.31	2	0	1	0	0	0	0.0123052
9193	1497.35	2	0	1	0	0	0	0.012339
9195	1497.38	2	0	1	0	0	0	0.0123115
9197	1497.41	2	0	1	0	0	0	0.0123359
9199	1497.45	2	0	1	0	0	0	0.0123795
9201	1497.48	2	0	1	0	0	0	0.0123753
9203	1497.51	2	0	1	0	0	0	0.0124447
9205	1497.55	2	0	1	0	0	0	0.0123854
9207	1497.58	2	0	1	0	0	0	0.0124224
9209	1497.61	2	0	1	0	0	0	0.0124168
9211	1497.65	2	0	1	0	0	0	0.012413
9213	1497.68	2	0	1	0	0	0	0.0123645
9215	1497.71	2	0	1	0	0	0	0.012383
9217	1497.75	2	0	1	0	0	0	0.0123865
9219	1497.78	2	0	1	0	0	0	0.012368
9221	1497.81	2	0	1	0	0	0	0.0124001
9223	1497.85	2	0	1	0	0	0	0.0123997
9225	1497.88	2	0	1	0	0	0	0.0123739
9227	1497.91	2	0	1	0	0	0	0.0123798
9229	1497.95	2	0	1	0	0	0	0.0123425
9231	1497.98	2	0	1	0	0	0	0.0123593
9233	1498.01	2	0	1	0	0	0	0.0123307
9235	1498.05	2	0	1	0	0	0	0.0122968
9237	1498.08	2	0	1	0	0	0	0.0122972
9239	1498.11	2	0	1	0	0	0	0.0122864
9241	1498.15	2	0	1	0	0	0	0.0122362
9243	1498.18	2	0	1	0	0	0	0.0122867
9245	1498.21	2	0	1	0	0	0	0.0122759
9247	1498.25	2	0	1	0	0	0	0.0122627
9249	1498.28	2	0	1	0	0	0	0.0122588
9251	1498.31	2	0	1	0	0	0	0.0122362
9253	1498.35	2	0	1	0	0	0	0.0122784
9255	1498.38	2	0	1	0	0	0	0.0122421
9257	1498.41	2	0	1	0	0	0	0.0122501
9259	1498.45	2	0	1	0	0	0	0.0122173
9261	1498.48	2	0	1	0	0	0	0.0122306
9263	1498.51	2	0	1	0	0	0	0.012203
9265	1498.55	2	0	1	0	0	0	0.0121919
9267	1498.58	2	0	1	0	0	0	0.0122187
9269	1498.61	2	0	1	0	0	0	0.0122365
9271	1498.65	2	0	1	0	0	0	0.0122257
9273	1498.68	2	0	1	0	0	0	0.0121842
9275	1498.71	2	0	1	0	0	0	0.0121438
9277	1498.75	2	0	1	0	0	0	0.0121431
9279	1498.78	2	0	1	0	0	0	0.0121469
9281	1498.81	2	0	1	0	0	0	0.0121591
9283	1498.85	2	0	1	0	0	0	0.0121347
9285	1498.88	2	0	1	0	0	0	0.0121064
9287	1498.91	2	0	1	0	0	0	0.0121385
9289	1498.95	2	0	1	0	0	0	0.0120744
9291	1498.98	2	0	1	0	0	0	0.0120203
9293	1499.01	2	0	1	0	0	0	0.012035
9295	1499.05	2	0	1	0	0	0	0.01202
9297	1499.08	2	0	1	0	0	0	0.0120252
9299	1499.11	2	0	1	0	0	0	0.0120234
9301	1499.15	2	0	1	0	0	0	0.0120102
9303	1499.18	2	0	1	0	0	0	0.0119342
9305	1499.21	2	0	1	0	0	0	0.0119607
9307	1499.25	2	0	1	0	0	0	0.0119349
9309	1499.28	2	0	1	0	0	0	0.0119052
9311	1499.31	2	0	1	0	0	0	0.0118937
9313	1499.35	2	0	1	0	0	0	0.0118913
9315	1499.38	2	0	1	0	0	0	0.0118745
9317	1499.41	2	0	1	0	0	0	0.0118079
9319	1499.45	2	0	1	0	0	0	0.0118139
9321	1499.48	2	0	1	0	0	0	0.0118603
9323	1499.51	2	0	1	0	0	0	0.0118575
9325	1499.55	2	0	1	0	0	0	0.0118327
9327	1499.58	2	0	1	0	0	0	0.01187
9329	1499.61	2	0	1	0	0	0	0.0118331
9331	1499.65	2	0	1	0	0	0	0.0118212
9333	1499.68	2	0	1	0	0	0	0.0118167
9335	1499.71	2	0	1	0	0	0	0.011854
9337	1499.75	2	0	1	0	0	0	0.0118379
9339	1499.78	2	0	1	0	0	0	0.0118334
9341	1499.81	2	0	1	0	0	0	0.0117863
9343	1499.85	2	0	1	0	0	0	0.011793
9345	1499.88	2	0	1	0	0	0	0.0117881
9347	1499.91	2	0	1	0	0	0	0.0117759
9349	1499.95	2	0	1	0	0	0	0.0117759
9351	1499.98	2	0	1	0	0	0	0.0117783
9353	1500.01	2	0	1	0	0	0	0.011778
9355	1500.05	2	0	1	0	0	0	0.0117542
9357	1500.08	2	0	1	0	0	0	0.0117867
9359	1500.11	2	0	1	0	0	0	0.0117668
9361	1500.15	2	0	1	0	0	0	0.0117333
9363	1500.18	2	0	1	0	0	0	0.011711
9365	1500.21	2	0	1	0	0	0	0.0116597
9367	1500.25	2	0	1	0	0	0	0.0116681
9369	1500.28	2	0	1	0	0	0	0.0116587
9371	1500.31	2	0	1	0	0	0	0.0116911
9373	1500.35	2	0	1	0	0	0	0.0116866
9375	1500.38	2	0	1	0	0	0	0.0116744
9377	1500.41	2	0	1	0	0	0	0.0116685
9379	1500.45	2	0	1	0	0	0	0.0116671
9381	1500.48	2	0	1	0	0	0	0.0116287
9383	1500.51	2	0	1	0	0	0	0.011627
9385	1500.55	2	0	1	0	0	0	0.0116277
9387	1500.58	2	0	1	0	0	0	0.0116242
9389	1500.61	2	0	1	0	0	0	0.0116493
9391	1500.65	2	0	1	0	0	0	0.0115708
9393	1500.68	2	0	1	0	0	0	0.0116144
9395	1500.71	2	0	1	0	0	0	0.0115949
9397	1500.75	2	0	1	0	0	0	0.0115632
9399	1500.78	2	0	1	0	0	0	0.0116064
9401	1500.81	2	0	1	0	0	0	0.0115684
9403	1500.85	2	0	1	0	0	0	0.0115792
9405	1500.88	2	0	1	0	0	0	0.0115597
9407	1500.91	2	0	1	0	0	0	0.0115865
9409	1500.95	2	0	1	0	0	0	0.0116019
9411	1500.98	2	0	1	0	0	0	0.0115645
9413	1501.01	2	0	1	0	0	0	0.0115642
9415	1501.05	2	0	1	0	0	0	0.0115701
9417	1501.08	2	0	1	0	0	0	0.0115471
9419	1501.11	2	0	1	0	0	0	0.0115942
9421	1501.15	2	0	1	0	0	0	0.0115604
9423	1501.18	2	0	1	0	0	0	0.0115639
9425	1501.21	2	0	1	0	0	0	0.0115848
9427	1501.25	2	0	1	0	0	0	0.0115203
9429	1501.28	2	0	1	0	0	0	0.0115865
9431	1501.31	2	0	1	0	0	0	0.0115666
9433	1501.35	2	0	1	0	0	0	0.0115593
9435	1501.38	2	0	1	0	0	0	0.0115583
9437	1501.41	2	0	1	0	0	0	0.011506
9439	1501.45	2	0	1	0	0	0	0.011552
9441	1501.48	2	0	1	0	0	0	0.01156
9443	1501.51	2	0	1	0	0	0	0.0115419
9445	1501.55	2	0	1	0	0	0	0.0115715
9447	1501.58	2	0	1	0	0	0	0.0115011
9449	1501.61	2	0	1	0	0	0	0.0115454
9451	1501.65	2	0	1	0	0	0	0.0115095
9453	1501.68	2	0	1	0	0	0	0.0115527
9455	1501.71	2	0	1	0	0	0	0.0115618
9457	1501.75	2	0	1	0	0	0	0.0115475
9459	1501.78	2	0	1	0	0	0	0.0115527
9461	1501.81	2	0	1	0	0	0	0.0115154
9463	1501.85	2	0	1	0	0	0	0.0115391
9465	1501.88	2	0	1	0	0	0	0.0115213
9467	1501.91	2	0	1	0	0	0	0.0114836
9469	1501.95	2	0	1	0	0	0	0.0115115
9471	1501.98	2	0	1	0	0	0	0.0115251
9473	1502.01	2	0	1	0	0	0	0.0115346
9475	1502.05	2	0	1	0	0	0	0.0115018
9477	1502.08	2	0	1	0	0	0	0.0115468
9479	1502.11	2	0	1	0	0	0	0.0114673
9481	1502.15	2	0	1	0	0	0	0.0115293
9483	1502.18	2	0	1	0	0	0	0.0114749
9485	1502.21	2	0	1	0	0	0	0.0114843
9487	1502.25	2	0	1	0	0	0	0.0115241
9489	1502.28	2	0	1	0	0	0	0.0114303
9491	1502.31	2	0	1	0	0	0	0.0114491
9493	1502.35	2	0	1	0	0	0	0.0114449
9495	1502.38	2	0	1	0	0	0	0.0114784
9497	1502.41	2	0	1	0	0	0	0.0114453
9499	1502.45	2	0	1	0	0	0	0.0114488
9501	1502.48	2	0	1	0	0	0	0.011485
9503	1502.51	2	0	1	0	0	0	0.011453
9505	1502.55	2	0	1	0	0	0	0.0114634
9507	1502.58	2	0	1	0	0	0	0.0114261
9509	1502.61	2	0	1	0	0	0	0.011476
9511	1502.65	2	0	1	0	0	0	0.0114875
9513	1502.68	2	0	1	0	0	0	0.0114781
9515	1502.71	2	0	1	0	0	0	0.0115101
9517	1502.75	2	0	1	0	0	0	0.0114582
9519	1502.78	2	0	1	0	0	0	0.0114861
9521	1502.81	2	0	1	0	0	0	0.0115436
9523	1502.85	2	0	1	0	0	0	0.0114554
9525	1502.88	2	0	1	0	0	0	0.011499
9527	1502.91	2	0	1	0	0	0	0.0114265
9529	1502.95	2	0	1	0	0	0	0.0114512
9531	1502.98	2	0	1	0	0	0	0.0114366
9533	1503.01	2	0	1	0	0	0	0.0114631
9535	1503.05	2	0	1	0	0	0	0.011446
9537	1503.08	2	0	1	0	0	0	0.0114571
9539	1503.11	2	0	1	0	0	0	0.011454
9541	1503.15	2	0	1	0	0	0	0.0114519
9543	1503.18	2	0	1	0	0	0	0.0114648
9545	1503.21	2	0	1	0	0	0	0.0115164
9547	1503.25	2	0	1	0	0	0	0.0115447
9549	1503.28	2	0	1	0	0	0	0.0115656
9551	1503.31	2	0	1	0	0	0	0.0115928
9553	1503.35	2	0	1	0	0	0	0.0115496
9555	1503.38	2	0	1	0	0	0	0.0115942
9557	1503.41	2	0	1	0	0	0	0.0115625
9559	1503.45	2	0	1	0	0	0	0.0115405
9561	1503.48	2	0	1	0	0	0	0.0115848
9563	1503.51	2	0	1	0	0	0	0.0115639
9565	1503.55	2	0	1	0	0	0	0.0115998
9567	1503.58	2	0	1	0	0	0	0.0115645
9569	1503.61	2	0	1	0	0	0	0.0115733
9571	1503.65	2	0	1	0	0	0	0.0115482
9573	1503.68	2	0	1	0	0	0	0.0115161
9575	1503.71	2	0	1	0	0	0	0.0115192
9577	1503.75	2	0	1	0	0	0	0.0115387
9579	1503.78	2	0	1	0	0	0	0.0115192
9581	1503.81	2	0	1	0	0	0	0.0114903
9583	1503.85	2	0	1	0	0	0	0.0115318
9585	1503.88	2	0	1	0	0	0	0.0115367
9587	1503.91	2	0	1	0	0	0	0.0114829
9589	1503.95	2	0	1	0	0	0	0.0115248
9591	1503.98	2	0	1	0	0	0	0.0115088
9593	1504.01	2	0	1	0	0	0	0.0115042
9595	1504.05	2	0	1	0	0	0	0.0114979
9597	1504.08	2	0	1	0	0	0	0.0115063
9599	1504.11	2	0	1	0	0	0	0.0114435
9601	1504.15	2	0	1	0	0	0	0.0114735
9603	1504.18	2	0	1	0	0	0	0.0114969
9605	1504.21	2	0	1	0	0	0	0.0114903
9607	1504.25	2	0	1	0	0	0	0.0114498
9609	1504.28	2	0	1	0	0	0	0.0114286
9611	1504.31	2	0	1	0	0	0	0.0114498
9613	1504.35	2	0	1	0	0	0	0.0114254
9615	1504.38	2	0	1	0	0	0	0.0114104
9617	1504.41	2	0	1	0	0	0	0.0114303
9619	1504.45	2	0	1	0	0	0	0.0113644
9621	1504.48	2	0	1	0	0	0	0.0113905
9623	1504.51	2	0	1	0	0	0	0.0113857
9625	1504.55	2	0	1	0	0	0	0.0114233
9627	1504.58	2	0	1	0	0	0	0.0113414
9629	1504.61	2	0	1	0	0	0	0.0114045
9631	1504.65	2	0	1	0	0	0	0.0113703
9633	1504.68	2	0	1	0	0	0	0.0113647
9635	1504.71	2	0	1	0	0	0	0.0113888
9637	1504.75	2	0	1	0	0	0	0.0113675
9639	1504.78	2	0	1	0	0	0	0.011401
9641	1504.81	2	0	1	0	0	0	0.0113456
9643	1504.85	2	0	1	0	0	0	0.0114265
9645	1504.88	2	0	1	0	0	0	0.0114125
9647	1504.91	2	0	1	0	0	0	0.0113916
9649	1504.95	2	0	1	0	0	0	0.0113633
9651	1504.98	2	0	1	0	0	0	0.0113919
9653	1505.01	2	0	1	0	0	0	0.0113571
9655	1505.05	2	0	1	0	0	0	0.0113686
9657	1505.08	2	0	1	0	0	0	0.0113619
9659	1505.11	2	0	1	0	0	0	0.0113822
9661	1505.15	2	0	1	0	0	0	0.011347
9663	1505.18	2	0	1	0	0	0	0.0113745
9665	1505.21	2	0	1	0	0	0	0.0113926
9667	1505.25	2	0	1	0	0	0	0.0113292
9669	1505.28	2	0	1	0	0	0	0.0114104
9671	1505.31	2	0	1	0	0	0	0.0114017
9673	1505.35	2	0	1	0	0	0	0.0113874
9675	1505.38	2	0	1	0	0	0	0.0114163
9677	1505.41	2	0	1	0	0	0	0.011415
9679	1505.45	2	0	1	0	0	0	0.0114352
9681	1505.48	2	0	1	0	0	0	0.0114435
9683	1505.51	2	0	1	0	0	0	0.0114331
9685	1505.55	2	0	1	0	0	0	0.0114571
9687	1505.58	2	0	1	0	0	0	0.0114631
9689	1505.61	2	0	1	0	0	0	0.0114066
9691	1505.65	2	0	1	0	0	0	0.0114125
9693	1505.68	2	0	1	0	0	0	0.0114146
9695	1505.71	2	0	1	0	0	0	0.0114111
9697	1505.75	2	0	1	0	0	0	0.0114062
9699	1505.78	2	0	1	0	0	0	0.0114156
9701	1505.81	2	0	1	0	0	0	0.0114575
9703	1505.85	2	0	1	0	0	0	0.011469
9705	1505.88	2	0	1	0	0	0	0.0114906
9707	1505.91	2	0	1	0	0	0	0.0114882
9709	1505.95	2	0	1	0	0	0	0.0114735
9711	1505.98	2	0	1	0	0	0	0.0115565
9713	1506.01	2	0	1	0	0	0	0.0115635
9715	1506.05	2	0	1	0	0	0	0.0115691
9717	1506.08	2	0	1	0	0	0	0.0115788
9719	1506.11	2	0	1	0	0	0	0.0115743
9721	1506.15	2	0	1	0	0	0	0.011506
9723	1506.18	2	0	1	0	0	0	0.0115095
9725	1506.21	2	0	1	0	0	0	0.0115063
9727	1506.25	2	0	1	0	0	0	0.0115088
9729	1506.28	2	0	1	0	0	0	0.0115482
9731	1506.31	2	0	1	0	0	0	0.0115373
9733	1506.35	2	0	1	0	0	0	0.011545
9735	1506.38	2	0	1	0	0	0	0.0115088
9737	1506.41	2	0	1	0	0	0	0.011476
9739	1506.45	2	0	1	0	0	0	0.011514
9741	1506.48	2	0	1	0	0	0	0.0115335
9743	1506.51	2	0	1	0	0	0	0.0115161
9745	1506.55	2	0	1	0	0	0	0.0114829
9747	1506.58	2	0	1	0	0	0	0.0114889
9749	1506.61	2	0	1	0	0	0	0.0114941
9751	1506.65	2	0	1	0	0	0	0.0115119
9753	1506.68	2	0	1	0	0	0	0.0115614
9755	1506.71	2	0	1	0	0	0	0.0115628
9757	1506.75	2	0	1	0	0	0	0.0115785
9759	1506.78	2	0	1	0	0	0	0.0115844
9761	1506.81	2	0	1	0	0	0	0.0115436
9763	1506.85	2	0	1	0	0	0	0.0115865
9765	1506.88	2	0	1	0	0	0	0.0115297
9767	1506.91	2	0	1	0	0	0	0.0115398
9769	1506.95	2	0	1	0	0	0	0.0115429
9771	1506.98	2	0	1	0	0	0	0.0115339
9773	1507.01	2	0	1	0	0	0	0.0115325
9775	1507.05	2	0	1	0	0	0	0.0115426
9777	1507.08	2	0	1	0	0	0	0.0115231
9779	1507.11	2	0	1	0	0	0	0.0114892
9781	1507.15	2	0	1	0	0	0	0.0115164
9783	1507.18	2	0	1	0	0	0	0.0115213
9785	1507.21	2	0	1	0	0	0	0.0115436
9787	1507.25	2	0	1	0	0	0	0.0114875
9789	1507.28	2	0	1	0	0	0	0.0115105
9791	1507.31	2	0	1	0	0	0	0.0115168
9793	1507.35	2	0	1	0	0	0	0.011492
9795	1507.38	2	0	1	0	0	0	0.0114568
9797	1507.41	2	0	1	0	0	0	0.0115056
9799	1507.45	2	0	1	0	0	0	0.0114816
9801	1507.48	2	0	1	0	0	0	0.0115014
9803	1507.51	2	0	1	0	0	0	0.0114892
9805	1507.55	2	0	1	0	0	0	0.0115471
9807	1507.58	2	0	1	0	0	0	0.0115203
9809	1507.61	2	0	1	0	0	0	0.0115224
9811	1507.65	2	0	1	0	0	0	0.0115206
9813	1507.68	2	0	1	0	0	0	0.0114847
9815	1507.71	2	0	1	0	0	0	0.0115185
9817	1507.75	2	0	1	0	0	0	0.0115258
9819	1507.78	2	0	1	0	0	0	0.0115227
9821	1507.81	2	0	1	0	0	0	0.0115373
9823	1507.85	2	0	1	0	0	0	0.0114829
9825	1507.88	2	0	1	0	0	0	0.0115119
9827	1507.91	2	0	1	0	0	0	0.011453
9829	1507.95	2	0	1	0	0	0	0.0114659
9831	1507.98	2	0	1	0	0	0	0.0114383
9833	1508.01	2	0	1	0	0	0	0.0114802
9835	1508.05	2	0	1	0	0	0	0.0114829
9837	1508.08	2	0	1	0	0	0	0.0114439
9839	1508.11	2	0	1	0	0	0	0.0114519
9841	1508.15	2	0	1	0	0	0	0.011454
9843	1508.18	2	0	1	0	0	0	0.0114571
9845	1508.21	2	0	1	0	0	0	0.011485
9847	1508.25	2	0	1	0	0	0	0.0114627
9849	1508.28	2	0	1	0	0	0	0.0115286
9851	1508.31	2	0	1	0	0	0	0.0115454
9853	1508.35	2	0	1	0	0	0	0.011522
9855	1508.38	2	0	1	0	0	0	0.0115255
9857	1508.41	2	0	1	0	0	0	0.0114739
9859	1508.45	2	0	1	0	0	0	0.0115503
9861	1508.48	2	0	1	0	0	0	0.0115101
9863	1508.51	2	0	1	0	0	0	0.01156
9865	1508.55	2	0	1	0	0	0	0.0115792
9867	1508.58	2	0	1	0	0	0	0.0115806
9869	1508.61	2	0	1	0	0	0	0.0115963
9871	1508.65	2	0	1	0	0	0	0.0116162
9873	1508.68	2	0	1	0	0	0	0.0116224
9875	1508.71	2	0	1	0	0	0	0.0116301
9877	1508.75	2	0	1	0	0	0	0.0116071
9879	1508.78	2	0	1	0	0	0	0.0116109
9881	1508.81	2	0	1	0	0	0	0.0116057
9883	1508.85	2	0	1	0	0	0	0.011582
9885	1508.88	2	0	1	0	0	0	0.0116196
9887	1508.91	2	0	1	0	0	0	0.0115921
9889	1508.95	2	0	1	0	0	0	0.0116081
9891	1508.98	2	0	1	0	0	0	0.0116217
9893	1509.01	2	0	1	0	0	0	0.0116388
9895	1509.05	2	0	1	0	0	0	0.0116953
9897	1509.08	2	0	1	0	0	0	0.0117117
9899	1509.11	2	0	1	0	0	0	0.0117291
9901	1509.15	2	0	1	0	0	0	0.011725
9903	1509.18	2	0	1	0	0	0	0.0116967
9905	1509.21	2	0	1	0	0	0	0.0117229
9907	1509.25	2	0	1	0	0	0	0.0117068
9909	1509.28	2	0	1	0	0	0	0.011727
9911	1509.31	2	0	1	0	0	0	0.0117194
9913	1509.35	2	0	1	0	0	0	0.0117054
9915	1509.38	2	0	1	0	0	0	0.0116629
9917	1509.41	2	0	1	0	0	0	0.0116479
9919	1509.45	2	0	1	0	0	0	0.0116981
9921	1509.48	2	0	1	0	0	0	0.0116688
9923	1509.51	2	0	1	0	0	0	0.0116719
9925	1509.55	2	0	1	0	0	0	0.0117288
9927	1509.58	2	0	1	0	0	0	0.0117298
9929	1509.61	2	0	1	0	0	0	0.0117661
9931	1509.65	2	0	1	0	0	0	0.0118125
9933	1509.68	2	0	1	0	0	0	0.0118501
9935	1509.71	2	0	1	0	0	0	0.0118076
9937	1509.75	2	0	1	0	0	0	0.0118006
9939	1509.78	2	0	1	0	0	0	0.0117874
9941	1509.81	2	0	1	0	0	0	0.0118229
9943	1509.85	2	0	1	0	0	0	0.0117905
9945	1509.88	2	0	1	0	0	0	0.0117595
9947	1509.91	2	0	1	0	0	0	0.0117413
9949	1509.95	2	0	1	0	0	0	0.0117469
9951	1509.98	2	0	1	0	0	0	0.0117605
9953	1510.01	2	0	1	0	0	0	0.0117807
9955	1510.05	2	0	1	0	0	0	0.0117755
9957	1510.08	2	0	1	0	0	0	0.0117654
9959	1510.11	2	0	1	0	0	0	0.0117005
9961	1510.15	2	0	1	0	0	0	0.0117033
9963	1510.18	2	0	1	0	0	0	0.0116883
9965	1510.21	2	0	1	0	0	0	0.0116448
9967	1510.25	2	0	1	0	0	0	0.0116427
9969	1510.28	2	0	1	0	0	0	0.0116336
9971	1510.31	2	0	1	0	0	0	0.0116388
9973	1510.35	2	0	1	0	0	0	0.0116737
9975	1510.38	2	0	1	0	0	0	0.011537
9977	1510.41	2	0	1	0	0	0	0.0115691
9979	1510.45	2	0	1	0	0	0	0.0115506
9981	1510.48	2	0	1	0	0	0	0.0115471
9983	1510.51	2	0	1	0	0	0	0.0115621
9985	1510.55	2	0	1	0	0	0	0.0115499
9987	1510.58	2	0	1	0	0	0	0.0115708
9989	1510.61	2	0	1	0	0	0	0.0115227
9991	1510.65	2	0	1	0	0	0	0.0115279
9993	1510.68	2	0	1	0	0	0	0.011476
9995	1510.71	2	0	1	0	0	0	0.0115129
9997	1510.75	2	0	1	0	0	0	0.0114924
9999	1510.78	2	0	1	0	0	0	0.0115276
10001	1510.81	2	0	1	0	0	0	0.011491
10003	1510.85	2	0	1	0	0	0	0.0114268
10005	1510.88	2	0	1	0	0	0	0.0114829
10007	1510.91	2	0	1	0	0	0	0.0114366
10009	1510.95	2	0	1	0	0	0	0.011514
10011	1510.98	2	0	1	0	0	0	0.0115091
10013	1511.01	2	0	1	0	0	0	0.0114767
10015	1511.05	2	0	1	0	0	0	0.0114857
10017	1511.08	2	0	1	0	0	0	0.0114592
10019	1511.11	2	0	1	0	0	0	0.0113829
10021	1511.15	2	0	1	0	0	0	0.0114446
10023	1511.18	2	0	1	0	0	0	0.0114453
10025	1511.21	2	0	1	0	0	0	0.0114704
10027	1511.25	2	0	1	0	0	0	0.0114156
10029	1511.28	2	0	1	0	0	0	0.0114279
10031	1511.31	2	0	1	0	0	0	0.0114244
10033	1511.35	2	0	1	0	0	0	0.0114254
10035	1511.38	2	0	1	0	0	0	0.0113972
10037	1511.41	2	0	1	0	0	0	0.0113912
10039	1511.45	2	0	1	0	0	0	0.0114118
10041	1511.48	2	0	1	0	0	0	0.0113825
10043	1511.51	2	0	1	0	0	0	0.0113996
10045	1511.55	2	0	1	0	0	0	0.0113857
10047	1511.58	2	0	1	0	0	0	0.0114442
10049	1511.61	2	0	1	0	0	0	0.011348
10051	1511.65	2	0	1	0	0	0	0.0113215
10053	1511.68	2	0	1	0	0	0	0.0114024
10055	1511.71	2	0	1	0	0	0	0.0113944
10057	1511.75	2	0	1	0	0	0	0.0113909
10059	1511.78	2	0	1	0	0	0	0.0113435
10061	1511.81	2	0	1	0	0	0	0.0113749
10063	1511.85	2	0	1	0	0	0	0.0113208
10065	1511.88	2	0	1	0	0	0	0.0113536
10067	1511.91	2	0	1	0	0	0	0.0113121
10069	1511.95	2	0	1	0	0	0	0.0113027
10071	1511.98	2	0	1	0	0	0	0.0113243
10073	1512.01	2	0	1	0	0	0	0.0113257
10075	1512.05	2	0	1	0	0	0	0.0113285
10077	1512.08	2	0	1	0	0	0	0.0112936
10079	1512.11	2	0	1	0	0	0	0.011302
10081	1512.15	2	0	1	0	0	0	0.0112992
10083	1512.18	2	0	1	0	0	0	0.0113166
10085	1512.21	2	0	1	0	0	0	0.011273
10087	1512.25	2	0	1	0	0	0	0.0112751
10089	1512.28	2	0	1	0	0	0	0.0113002
10091	1512.31	2	0	1	0	0	0	0.0113198
10093	1512.35	2	0	1	0	0	0	0.0112483
10095	1512.38	2	0	1	0	0	0	0.0112688
10097	1512.41	2	0	1	0	0	0	0.0113414
10099	1512.45	2	0	1	0	0	0	0.0112751
10101	1512.48	2	0	1	0	0	0	0.0112573
10103	1512.51	2	0	1	0	0	0	0.0112228
10105	1512.55	2	0	1	0	0	0	0.0112416
10107	1512.58	2	0	1	0	0	0	0.011279
10109	1512.61	2	0	1	0	0	0	0.0112988
10111	1512.65	2	0	1	0	0	0	0.0112629
10113	1512.68	2	0	1	0	0	0	0.011264
10115	1512.71	2	0	1	0	0	0	0.0113114
10117	1512.75	2	0	1	0	0	0	0.0113016
10119	1512.78	2	0	1	0	0	0	0.0112971
10121	1512.81	2	0	1	0	0	0	0.0112772
10123	1512.85	2	0	1	0	0	0	0.0112542
10125	1512.88	2	0	1	0	0	0	0.0112681
10127	1512.91	2	0	1	0	0	0	0.0112863
10129	1512.95	2	0	1	0	0	0	0.0113082
10131	1512.98	2	0	1	0	0	0	0.0112183
10133	1513.01	2	0	1	0	0	0	0.0112908
10135	1513.05	2	0	1	0	0	0	0.0112423
10137	1513.08	2	0	1	0	0	0	0.0112284
10139	1513.11	2	0	1	0	0	0	0.0112734
10141	1513.15	2	0	1	0	0	0	0.0112559
10143	1513.18	2	0	1	0	0	0	0.0112723
10145	1513.21	2	0	1	0	0	0	0.0112716
10147	1513.25	2	0	1	0	0	0	0.011234
10149	1513.28	2	0	1	0	0	0	0.0111942
10151	1513.31	2	0	1	0	0	0	0.0112211
10153	1513.35	2	0	1	0	0	0	0.0112256
10155	1513.38	2	0	1	0	0	0	0.0111977
10157	1513.41	2	0	1	0	0	0	0.0112807
10159	1513.45	2	0	1	0	0	0	0.0112012
10161	1513.48	2	0	1	0	0	0	0.0112594
10163	1513.51	2	0	1	0	0	0	0.0112308
10165	1513.55	2	0	1	0	0	0	0.0112211
10167	1513.58	2	0	1	0	0	0	0.0112678
10169	1513.61	2	0	1	0	0	0	0.0112336
10171	1513.65	2	0	1	0	0	0	0.0112287
10173	1513.68	2	0	1	0	0	0	0.0112193
10175	1513.71	2	0	1	0	0	0	0.011181
10177	1513.75	2	0	1	0	0	0	0.0112333
10179	1513.78	2	0	1	0	0	0	0.0111799
10181	1513.81	2	0	1	0	0	0	0.01128
10183	1513.85	2	0	1	0	0	0	0.0112179
10185	1513.88	2	0	1	0	0	0	0.0112117
10187	1513.91	2	0	1	0	0	0	0.0112064
10189	1513.95	2	0	1	0	0	0	0.0112277
10191	1513.98	2	0	1	0	0	0	0.0112797
10193	1514.01	2	0	1	0	0	0	0.0112486
10195	1514.05	2	0	1	0	0	0	0.0112647
10197	1514.08	2	0	1	0	0	0	0.0112615
10199	1514.11	2	0	1	0	0	0	0.0112779
10201	1514.15	2	0	1	0	0	0	0.0112946
10203	1514.18	2	0	1	0	0	0	0.0112887
10205	1514.21	2	0	1	0	0	0	0.0112204
10207	1514.25	2	0	1	0	0	0	0.0112406
10209	1514.28	2	0	1	0	0	0	0.0112894
10211	1514.31	2	0	1	0	0	0	0.011249
10213	1514.35	2	0	1	0	0	0	0.0112793
10215	1514.38	2	0	1	0	0	0	0.0112361
10217	1514.41	2	0	1	0	0	0	0.0112521
10219	1514.45	2	0	1	0	0	0	0.0112312
10221	1514.48	2	0	1	0	0	0	0.0112263
10223	1514.51	2	0	1	0	0	0	0.0112308
10225	1514.55	2	0	1	0	0	0	0.0112441
10227	1514.58	2	0	1	0	0	0	0.0112312
10229	1514.61	2	0	1	0	0	0	0.0112284
10231	1514.65	2	0	1	0	0	0	0.0112507
10233	1514.68	2	0	1	0	0	0	0.0112608
10235	1514.71	2	0	1	0	0	0	0.0112765
10237	1514.75	2	0	1	0	0	0	0.0113194
10239	1514.78	2	0	1	0	0	0	0.011234
10241	1514.81	2	0	1	0	0	0	0.0112633
10243	1514.85	2	0	1	0	0	0	0.0112183
10245	1514.88	2	0	1	0	0	0	0.0112172
10247	1514.91	2	0	1	0	0	0	0.011279
10249	1514.95	2	0	1	0	0	0	0.0112786
10251	1514.98	2	0	1	0	0	0	0.0112817
10253	1515.01	2	0	1	0	0	0	0.01131
10255	1515.05	2	0	1	0	0	0	0.0112525
10257	1515.08	2	0	1	0	0	0	0.0112451
10259	1515.11	2	0	1	0	0	0	0.0112674
10261	1515.15	2	0	1	0	0	0	0.0113072
10263	1515.18	2	0	1	0	0	0	0.0112619
10265	1515.21	2	0	1	0	0	0	0.0112748
10267	1515.25	2	0	1	0	0	0	0.0112364
10269	1515.28	2	0	1	0	0	0	0.0112587
10271	1515.31	2	0	1	0	0	0	0.0112657
10273	1515.35	2	0	1	0	0	0	0.0112396
10275	1515.38	2	0	1	0	0	0	0.0112894
10277	1515.41	2	0	1	0	0	0	0.0112441
10279	1515.45	2	0	1	0	0	0	0.0112423
10281	1515.48	2	0	1	0	0	0	0.0112437
10283	1515.51	2	0	1	0	0	0	0.0112333
10285	1515.55	2	0	1	0	0	0	0.0112838
10287	1515.58	2	0	1	0	0	0	0.0112266
10289	1515.61	2	0	1	0	0	0	0.0112141
10291	1515.65	2	0	1	0	0	0	0.0112612
10293	1515.68	2	0	1	0	0	0	0.0112312
10295	1515.71	2	0	1	0	0	0	0.0111517
10297	1515.75	2	0	1	0	0	0	0.0111587
10299	1515.78	2	0	1	0	0	0	0.0112169
10301	1515.81	2	0	1	0	0	0	0.0111838
10303	1515.85	2	0	1	0	0	0	0.011182
10305	1515.88	2	0	1	0	0	0	0.0111911
10307	1515.91	2	0	1	0	0	0	0.0112232
10309	1515.95	2	0	1	0	0	0	0.0112385
10311	1515.98	2	0	1	0	0	0	0.0112368
10313	1516.01	2	0	1	0	0	0	0.0112144
10315	1516.05	2	0	1	0	0	0	0.0112134
10317	1516.08	2	0	1	0	0	0	0.0112301
10319	1516.11	2	0	1	0	0	0	0.0111827
10321	1516.15	2	0	1	0	0	0	0.0111914
10323	1516.18	2	0	1	0	0	0	0.0111988
10325	1516.21	2	0	1	0	0	0	0.0111893
10327	1516.25	2	0	1	0	0	0	0.011189
10329	1516.28	2	0	1	0	0	0	0.0111852
10331	1516.31	2	0	1	0	0	0	0.0112113
10333	1516.35	2	0	1	0	0	0	0.0112427
10335	1516.38	2	0	1	0	0	0	0.011175
10337	1516.41	2	0	1	0	0	0	0.0112151
10339	1516.45	2	0	1	0	0	0	0.0112298
10341	1516.48	2	0	1	0	0	0	0.0113027
10343	1516.51	2	0	1	0	0	0	0.0113529
10345	1516.55	2	0	1	0	0	0	0.011325
10347	1516.58	2	0	1	0	0	0	0.0113407
10349	1516.61	2	0	1	0	0	0	0.0113288
10351	1516.65	2	0	1	0	0	0	0.0113341
10353	1516.68	2	0	1	0	0	0	0.0112971
10355	1516.71	2	0	1	0	0	0	0.011325
10357	1516.75	2	0	1	0	0	0	0.0112992
10359	1516.78	2	0	1	0	0	0	0.0112748
10361	1516.81	2	0	1	0	0	0	0.0112762
10363	1516.85	2	0	1	0	0	0	0.0112573
10365	1516.88	2	0	1	0	0	0	0.0112845
10367	1516.91	2	0	1	0	0	0	0.0113069
10369	1516.95	2	0	1	0	0	0	0.0112877
10371	1516.98	2	0	1	0	0	0	0.0112235
10373	1517.01	2	0	1	0	0	0	0.0112249
10375	1517.05	2	0	1	0	0	0	0.011235
10377	1517.08	2	0	1	0	0	0	0.0112392
10379	1517.11	2	0	1	0	0	0	0.011258
10381	1517.15	2	0	1	0	0	0	0.0112692
10383	1517.18	2	0	1	0	0	0	0.0113093
10385	1517.21	2	0	1	0	0	0	0.0113159
10387	1517.25	2	0	1	0	0	0	0.0113651
10389	1517.28	2	0	1	0	0	0	0.0113079
10391	1517.31	2	0	1	0	0	0	0.0113525
10393	1517.35	2	0	1	0	0	0	0.0113752
10395	1517.38	2	0	1	0	0	0	0.0113504
10397	1517.41	2	0	1	0	0	0	0.0113982
10399	1517.45	2	0	1	0	0	0	0.0114132
10401	1517.48	2	0	1	0	0	0	0.0113382
10403	1517.51	2	0	1	0	0	0	0.0113919
10405	1517.55	2	0	1	0	0	0	0.0113361
10407	1517.58	2	0	1	0	0	0	0.0114442
10409	1517.61	2	0	1	0	0	0	0.0114059
10411	1517.65	2	0	1	0	0	0	0.0114526
10413	1517.68	2	0	1	0	0	0	0.0114362
10415	1517.71	2	0	1	0	0	0	0.0114111
10417	1517.75	2	0	1	0	0	0	0.0114551
10419	1517.78	2	0	1	0	0	0	0.0114603
10421	1517.81	2	0	1	0	0	0	0.0115119
10423	1517.85	2	0	1	0	0	0	0.0115244
10425	1517.88	2	0	1	0	0	0	0.0115258
10427	1517.91	2	0	1	0	0	0	0.0115276
10429	1517.95	2	0	1	0	0	0	0.0115618
10431	1517.98	2	0	1	0	0	0	0.0115652
10433	1518.01	2	0	1	0	0	0	0.0115426
10435	1518.05	2	0	1	0	0	0	0.0115478
10437	1518.08	2	0	1	0	0	0	0.0115101
10439	1518.11	2	0	1	0	0	0	0.011477
10441	1518.15	2	0	1	0	0	0	0.0114683
10443	1518.18	2	0	1	0	0	0	0.0114676
10445	1518.21	2	0	1	0	0	0	0.01147
10447	1518.25	2	0	1	0	0	0	0.0114578
10449	1518.28	2	0	1	0	0	0	0.0114861
10451	1518.31	2	0	1	0	0	0	0.0114735
10453	1518.35	2	0	1	0	0	0	0.0113968
10455	1518.38	2	0	1	0	0	0	0.0114449
10457	1518.41	2	0	1	0	0	0	0.0114104
10459	1518.45	2	0	1	0	0	0	0.0114435
10461	1518.48	2	0	1	0	0	0	0.0114624
10463	1518.51	2	0	1	0	0	0	0.0114219
10465	1518.55	2	0	1	0	0	0	0.0115105
10467	1518.58	2	0	1	0	0	0	0.011559
10469	1518.61	2	0	1	0	0	0	0.011553
10471	1518.65	2	0	1	0	0	0	0.0115311
10473	1518.68	2	0	1	0	0	0	0.0115576
10475	1518.71	2	0	1	0	0	0	0.0115447
10477	1518.75	2	0	1	0	0	0	0.0115607
10479	1518.78	2	0	1	0	0	0	0.0115649
10481	1518.81	2	0	1	0	0	0	0.0115412
10483	1518.85	2	0	1	0	0	0	0.0115433
10485	1518.88	2	0	1	0	0	0	0.0115534
10487	1518.91	2	0	1	0	0	0	0.0115586
10489	1518.95	2	0	1	0	0	0	0.0115656
10491	1518.98	2	0	1	0	0	0	0.0115213
10493	1519.01	2	0	1	0	0	0	0.0115401
10495	1519.05	2	0	1	0	0	0	0.0115335
10497	1519.08	2	0	1	0	0	0	0.0115583
10499	1519.11	2	0	1	0	0	0	0.0115931
10501	1519.15	2	0	1	0	0	0	0.0116238
10503	1519.18	2	0	1	0	0	0	0.0115883
10505	1519.21	2	0	1	0	0	0	0.0115931
10507	1519.25	2	0	1	0	0	0	0.0115618
10509	1519.28	2	0	1	0	0	0	0.011559
10511	1519.31	2	0	1	0	0	0	0.0115701
10513	1519.35	2	0	1	0	0	0	0.0115454
10515	1519.38	2	0	1	0	0	0	0.0114983
10517	1519.41	2	0	1	0	0	0	0.011515
10519	1519.45	2	0	1	0	0	0	0.0115196
10521	1519.48	2	0	1	0	0	0	0.0115384
10523	1519.51	2	0	1	0	0	0	0.0115108
10525	1519.55	2	0	1	0	0	0	0.0115677
10527	1519.58	2	0	1	0	0	0	0.0115778
10529	1519.61	2	0	1	0	0	0	0.011567
10531	1519.65	2	0	1	0	0	0	0.0115827
10533	1519.68	2	0	1	0	0	0	0.0115656
10535	1519.71	2	0	1	0	0	0	0.0115447
10537	1519.75	2	0	1	0	0	0	0.0115168
10539	1519.78	2	0	1	0	0	0	0.0115384
10541	1519.81	2	0	1	0	0	0	0.0114979
10543	1519.85	2	0	1	0	0	0	0.011453
10545	1519.88	2	0	1	0	0	0	0.0115032
10547	1519.91	2	0	1	0	0	0	0.0114484
10549	1519.95	2	0	1	0	0	0	0.0114146
10551	1519.98	2	0	1	0	0	0	0.011432
10553	1520.01	2	0	1	0	0	0	0.0114606
10555	1520.05	2	0	1	0	0	0	0.0114122
10557	1520.08	2	0	1	0	0	0	0.0113738
10559	1520.11	2	0	1	0	0	0	0.0113442
10561	1520.15	2	0	1	0	0	0	0.0114122
10563	1520.18	2	0	1	0	0	0	0.0113501
10565	1520.21	2	0	1	0	0	0	0.0113626
10567	1520.25	2	0	1	0	0	0	0.0113912
10569	1520.28	2	0	1	0	0	0	0.0113926
10571	1520.31	2	0	1	0	0	0	0.011416
10573	1520.35	2	0	1	0	0	0	0.0114258
10575	1520.38	2	0	1	0	0	0	0.0114237
10577	1520.41	2	0	1	0	0	0	0.0113801
10579	1520.45	2	0	1	0	0	0	0.0114453
10581	1520.48	2	0	1	0	0	0	0.0114624
10583	1520.51	2	0	1	0	0	0	0.0115056
10585	1520.55	2	0	1	0	0	0	0.0114742
10587	1520.58	2	0	1	0	0	0	0.0114735
10589	1520.61	2	0	1	0	0	0	0.0114924
10591	1520.65	2	0	1	0	0	0	0.0114512
10593	1520.68	2	0	1	0	0	0	0.0115021
10595	1520.71	2	0	1	0	0	0	0.0115244
10597	1520.75	2	0	1	0	0	0	0.0115719
10599	1520.78	2	0	1	0	0	0	0.0115774
10601	1520.81	2	0	1	0	0	0	0.0115938
10603	1520.85	2	0	1	0	0	0	0.0115632
10605	1520.88	2	0	1	0	0	0	0.0115761
10607	1520.91	2	0	1	0	0	0	0.0115122
10609	1520.95	2	0	1	0	0	0	0.0115447
10611	1520.98	2	0	1	0	0	0	0.0114924
10613	1521.01	2	0	1	0	0	0	0.011515
10615	1521.05	2	0	1	0	0	0	0.0114558
10617	1521.08	2	0	1	0	0	0	0.0114718
10619	1521.11	2	0	1	0	0	0	0.0114648
10621	1521.15	2	0	1	0	0	0	0.0114704
10623	1521.18	2	0	1	0	0	0	0.0114959
10625	1521.21	2	0	1	0	0	0	0.0114781
10627	1521.25	2	0	1	0	0	0	0.0114279
10629	1521.28	2	0	1	0	0	0	0.0114927
10631	1521.31	2	0	1	0	0	0	0.0114195
10633	1521.35	2	0	1	0	0	0	0.0114833
10635	1521.38	2	0	1	0	0	0	0.0114732
10637	1521.41	2	0	1	0	0	0	0.0114568
10639	1521.45	2	0	1	0	0	0	0.0114864
10641	1521.48	2	0	1	0	0	0	0.0114805
10643	1521.51	2	0	1	0	0	0	0.0115018
10645	1521.55	2	0	1	0	0	0	0.0115534
10647	1521.58	2	0	1	0	0	0	0.0115314
10649	1521.61	2	0	1	0	0	0	0.0114725
10651	1521.65	2	0	1	0	0	0	0.0115279
10653	1521.68	2	0	1	0	0	0	0.0115258
10655	1521.71	2	0	1	0	0	0	0.0114655
10657	1521.75	2	0	1	0	0	0	0.0114442
10659	1521.78	2	0	1	0	0	0	0.0113965
10661	1521.81	2	0	1	0	0	0	0.0113916
10663	1521.85	2	0	1	0	0	0	0.0114048
10665	1521.88	2	0	1	0	0	0	0.0113794
10667	1521.91	2	0	1	0	0	0	0.0113689
10669	1521.95	2	0	1	0	0	0	0.0114195
10671	1521.98	2	0	1	0	0	0	0.011453
10673	1522.01	2	0	1	0	0	0	0.011424
10675	1522.05	2	0	1	0	0	0	0.0114303
10677	1522.08	2	0	1	0	0	0	0.0114334
10679	1522.11	2	0	1	0	0	0	0.0113846
10681	1522.15	2	0	1	0	0	0	0.0113923
10683	1522.18	2	0	1	0	0	0	0.0113567
10685	1522.21	2	0	1	0	0	0	0.011417
10687	1522.25	2	0	1	0	0	0	0.0113958
10689	1522.28	2	0	1	0	0	0	0.0113578
10691	1522.31	2	0	1	0	0	0	0.0113759
10693	1522.35	2	0	1	0	0	0	0.0113626
10695	1522.38	2	0	1	0	0	0	0.0113347
10697	1522.41	2	0	1	0	0	0	0.011317
10699	1522.45	2	0	1	0	0	0	0.0113159
10701	1522.48	2	0	1	0	0	0	0.0113236
10703	1522.51	2	0	1	0	0	0	0.0113082
10705	1522.55	2	0	1	0	0	0	0.011287
10707	1522.58	2	0	1	0	0	0	0.0112786
10709	1522.61	2	0	1	0	0	0	0.0112943
10711	1522.65	2	0	1	0	0	0	0.011296
10713	1522.68	2	0	1	0	0	0	0.0112678
10715	1522.71	2	0	1	0	0	0	0.0112493
10717	1522.75	2	0	1	0	0	0	0.0112824
10719	1522.78	2	0	1	0	0	0	0.0112127
10721	1522.81	2	0	1	0	0	0	0.0112688
10723	1522.85	2	0	1	0	0	0	0.0112622
10725	1522.88	2	0	1	0	0	0	0.0112291
10727	1522.91	2	0	1	0	0	0	0.0112525
10729	1522.95	2	0	1	0	0	0	0.0112699
10731	1522.98	2	0	1	0	0	0	0.0112974
10733	1523.01	2	0	1	0	0	0	0.0112559
10735	1523.05	2	0	1	0	0	0	0.011279
10737	1523.08	2	0	1	0	0	0	0.0112249
10739	1523.11	2	0	1	0	0	0	0.0112347
10741	1523.15	2	0	1	0	0	0	0.0112612
10743	1523.18	2	0	1	0	0	0	0.0112354
10745	1523.21	2	0	1	0	0	0	0.01128
10747	1523.25	2	0	1	0	0	0	0.011303
10749	1523.28	2	0	1	0	0	0	0.0113041
10751	1523.31	2	0	1	0	0	0	0.0112713
10753	1523.35	2	0	1	0	0	0	0.011234
10755	1523.38	2	0	1	0	0	0	0.0112563
10757	1523.41	2	0	1	0	0	0	0.011296
10759	1523.45	2	0	1	0	0	0	0.0112497
10761	1523.48	2	0	1	0	0	0	0.0113323
10763	1523.51	2	0	1	0	0	0	0.0112486
10765	1523.55	2	0	1	0	0	0	0.0112793
10767	1523.58	2	0	1	0	0	0	0.0112486
10769	1523.61	2	0	1	0	0	0	0.0112538
10771	1523.65	2	0	1	0	0	0	0.0112514
10773	1523.68	2	0	1	0	0	0	0.0112538
10775	1523.71	2	0	1	0	0	0	0.0112859
10777	1523.75	2	0	1	0	0	0	0.0112762
10779	1523.78	2	0	1	0	0	0	0.0113271
10781	1523.81	2	0	1	0	0	0	0.0113163
10783	1523.85	2	0	1	0	0	0	0.0113016
10785	1523.88	2	0	1	0	0	0	0.0113435
10787	1523.91	2	0	1	0	0	0	0.0113327
10789	1523.95	2	0	1	0	0	0	0.01137
10791	1523.98	2	0	1	0	0	0	0.0113456
10793	1524.01	2	0	1	0	0	0	0.0113703
10795	1524.05	2	0	1	0	0	0	0.0113752
10797	1524.08	2	0	1	0	0	0	0.0114104
10799	1524.11	2	0	1	0	0	0	0.0114397
10801	1524.15	2	0	1	0	0	0	0.0113958
10803	1524.18	2	0	1	0	0	0	0.0114292
10805	1524.21	2	0	1	0	0	0	0.0114415
10807	1524.25	2	0	1	0	0	0	0.0115004
10809	1524.28	2	0	1	0	0	0	0.01153
10811	1524.31	2	0	1	0	0	0	0.0114742
10813	1524.35	2	0	1	0	0	0	0.0115625
10815	1524.38	2	0	1	0	0	0	0.0115175
10817	1524.41	2	0	1	0	0	0	0.0115088
10819	1524.45	2	0	1	0	0	0	0.0115597
10821	1524.48	2	0	1	0	0	0	0.0115014
10823	1524.51	2	0	1	0	0	0	0.0115485
10825	1524.55	2	0	1	0	0	0	0.0115443
10827	1524.58	2	0	1	0	0	0	0.011537
10829	1524.61	2	0	1	0	0	0	0.011522
10831	1524.65	2	0	1	0	0	0	0.0115272
10833	1524.68	2	0	1	0	0	0	0.0115203
10835	1524.71	2	0	1	0	0	0	0.0114899
10837	1524.75	2	0	1	0	0	0	0.0115258
10839	1524.78	2	0	1	0	0	0	0.011514
10841	1524.81	2	0	1	0	0	0	0.0115
10843	1524.85	2	0	1	0	0	0	0.0114554
10845	1524.88	2	0	1	0	0	0	0.0114721
10847	1524.91	2	0	1	0	0	0	0.0114554
10849	1524.95	2	0	1	0	0	0	0.0114666
10851	1524.98	2	0	1	0	0	0	0.011506
10853	1525.01	2	0	1	0	0	0	0.0114997
10855	1525.05	2	0	1	0	0	0	0.0115161
10857	1525.08	2	0	1	0	0	0	0.0115007
10859	1525.11	2	0	1	0	0	0	0.0115021
10861	1525.15	2	0	1	0	0	0	0.0114965
10863	1525.18	2	0	1	0	0	0	0.0114655
10865	1525.21	2	0	1	0	0	0	0.0114903
10867	1525.25	2	0	1	0	0	0	0.0114788
10869	1525.28	2	0	1	0	0	0	0.0114676
10871	1525.31	2	0	1	0	0	0	0.0115231
10873	1525.35	2	0	1	0	0	0	0.0114711
10875	1525.38	2	0	1	0	0	0	0.0115272
10877	1525.41	2	0	1	0	0	0	0.0115241
10879	1525.45	2	0	1	0	0	0	0.0115088
10881	1525.48	2	0	1	0	0	0	0.0115865
10883	1525.51	2	0	1	0	0	0	0.0115705
10885	1525.55	2	0	1	0	0	0	0.0115363
10887	1525.58	2	0	1	0	0	0	0.0115084
10889	1525.61	2	0	1	0	0	0	0.0115129
10891	1525.65	2	0	1	0	0	0	0.011484
10893	1525.68	2	0	1	0	0	0	0.0115095
10895	1525.71	2	0	1	0	0	0	0.0114798
10897	1525.75	2	0	1	0	0	0	0.0114418
10899	1525.78	2	0	1	0	0	0	0.0114491
10901	1525.81	2	0	1	0	0	0	0.0114303
10903	1525.85	2	0	1	0	0	0	0.0114453
10905	1525.88	2	0	1	0	0	0	0.0114373
10907	1525.91	2	0	1	0	0	0	0.0114181
10909	1525.95	2	0	1	0	0	0	0.0114519
10911	1525.98	2	0	1	0	0	0	0.0114003
10913	1526.01	2	0	1	0	0	0	0.011379
10915	1526.05	2	0	1	0	0	0	0.0114034
10917	1526.08	2	0	1	0	0	0	0.0114279
10919	1526.11	2	0	1	0	0	0	0.0113539
10921	1526.15	2	0	1	0	0	0	0.0114247
10923	1526.18	2	0	1	0	0	0	0.0114749
10925	1526.21	2	0	1	0	0	0	0.0115049
10927	1526.25	2	0	1	0	0	0	0.0114854
10929	1526.28	2	0	1	0	0	0	0.011468
10931	1526.31	2	0	1	0	0	0	0.0114892
10933	1526.35	2	0	1	0	0	0	0.0114899
10935	1526.38	2	0	1	0	0	0	0.0115042
10937	1526.41	2	0	1	0	0	0	0.0114819
10939	1526.45	2	0	1	0	0	0	0.0115189
10941	1526.48	2	0	1	0	0	0	0.0114816
10943	1526.51	2	0	1	0	0	0	0.011492
10945	1526.55	2	0	1	0	0	0	0.0115443
10947	1526.58	2	0	1	0	0	0	0.0115237
10949	1526.61	2	0	1	0	0	0	0.0114652
10951	1526.65	2	0	1	0	0	0	0.0114554
10953	1526.68	2	0	1	0	0	0	0.0115105
10955	1526.71	2	0	1	0	0	0	0.0114467
10957	1526.75	2	0	1	0	0	0	0.0114843
10959	1526.78	2	0	1	0	0	0	0.0114306
10961	1526.81	2	0	1	0	0	0	0.011447
10963	1526.85	2	0	1	0	0	0	0.0114369
10965	1526.88	2	0	1	0	0	0	0.0114509
10967	1526.91	2	0	1	0	0	0	0.0114537
10969	1526.95	2	0	1	0	0	0	0.0114111
10971	1526.98	2	0	1	0	0	0	0.0114348
10973	1527.01	2	0	1	0	0	0	0.0114523
10975	1527.05	2	0	1	0	0	0	0.0115004
10977	1527.08	2	0	1	0	0	0	0.0115084
10979	1527.11	2	0	1	0	0	0	0.0114892
10981	1527.15	2	0	1	0	0	0	0.0115133
10983	1527.18	2	0	1	0	0	0	0.011521
10985	1527.21	2	0	1	0	0	0	0.0115475
10987	1527.25	2	0	1	0	0	0	0.0115304
10989	1527.28	2	0	1	0	0	0	0.0115276
10991	1527.31	2	0	1	0	0	0	0.0115119
10993	1527.35	2	0	1	0	0	0	0.0115269
10995	1527.38	2	0	1	0	0	0	0.0115415
10997	1527.41	2	0	1	0	0	0	0.0114986
10999	1527.45	2	0	1	0	0	0	0.0114889
11001	1527.48	2	0	1	0	0	0	0.0114617
11003	1527.51	2	0	1	0	0	0	0.0114627
11005	1527.55	2	0	1	0	0	0	0.0115192
11007	1527.58	2	0	1	0	0	0	0.0114652
11009	1527.61	2	0	1	0	0	0	0.0114474
11011	1527.65	2	0	1	0	0	0	0.0114415
11013	1527.68	2	0	1	0	0	0	0.0114673
11015	1527.71	2	0	1	0	0	0	0.0114798
11017	1527.75	2	0	1	0	0	0	0.0114711
11019	1527.78	2	0	1	0	0	0	0.0114422
11021	1527.81	2	0	1	0	0	0	0.0114561
11023	1527.85	2	0	1	0	0	0	0.0114477
11025	1527.88	2	0	1	0	0	0	0.0114491
11027	1527.91	2	0	1	0	0	0	0.0115189
11029	1527.95	2	0	1	0	0	0	0.0114512
11031	1527.98	2	0	1	0	0	0	0.0115091
11033	1528.01	2	0	1	0	0	0	0.011507
11035	1528.05	2	0	1	0	0	0	0.0114666
11037	1528.08	2	0	1	0	0	0	0.011476
11039	1528.11	2	0	1	0	0	0	0.0114732
11041	1528.15	2	0	1	0	0	0	0.011461
11043	1528.18	2	0	1	0	0	0	0.0114118
11045	1528.21	2	0	1	0	0	0	0.0113881
11047	1528.25	2	0	1	0	0	0	0.011393
11049	1528.28	2	0	1	0	0	0	0.0114153
11051	1528.31	2	0	1	0	0	0	0.0113693
11053	1528.35	2	0	1	0	0	0	0.0114034
11055	1528.38	2	0	1	0	0	0	0.0114394
11057	1528.41	2	0	1	0	0	0	0.011393
11059	1528.45	2	0	1	0	0	0	0.0114627
11061	1528.48	2	0	1	0	0	0	0.0114282
11063	1528.51	2	0	1	0	0	0	0.0113825
11065	1528.55	2	0	1	0	0	0	0.0114101
11067	1528.58	2	0	1	0	0	0	0.0113968
11069	1528.61	2	0	1	0	0	0	0.0113818
11071	1528.65	2	0	1	0	0	0	0.0113567
11073	1528.68	2	0	1	0	0	0	0.0113665
11075	1528.71	2	0	1	0	0	0	0.0113511
11077	1528.75	2	0	1	0	0	0	0.0113578
11079	1528.78	2	0	1	0	0	0	0.0114017
11081	1528.81	2	0	1	0	0	0	0.0113536
11083	1528.85	2	0	1	0	0	0	0.0113944
11085	1528.88	2	0	1	0	0	0	0.0114282
11087	1528.91	2	0	1	0	0	0	0.0114376
11089	1528.95	2	0	1	0	0	0	0.0113916
11091	1528.98	2	0	1	0	0	0	0.0114094
11093	1529.01	2	0	1	0	0	0	0.0114261
11095	1529.05	2	0	1	0	0	0	0.0114094
11097	1529.08	2	0	1	0	0	0	0.0114446
11099	1529.11	2	0	1	0	0	0	0.0114422
11101	1529.15	2	0	1	0	0	0	0.011438
11103	1529.18	2	0	1	0	0	0	0.0114802
11105	1529.21	2	0	1	0	0	0	0.0114554
11107	1529.25	2	0	1	0	0	0	0.0114774
11109	1529.28	2	0	1	0	0	0	0.0114655
11111	1529.31	2	0	1	0	0	0	0.011468
11113	1529.35	2	0	1	0	0	0	0.0114596
11115	1529.38	2	0	1	0	0	0	0.0114756
11117	1529.41	2	0	1	0	0	0	0.0114219
11119	1529.45	2	0	1	0	0	0	0.0114258
11121	1529.48	2	0	1	0	0	0	0.0114474
11123	1529.51	2	0	1	0	0	0	0.0114467
11125	1529.55	2	0	1	0	0	0	0.0114463
11127	1529.58	2	0	1	0	0	0	0.011492
11129	1529.61	2	0	1	0	0	0	0.0114568
11131	1529.65	2	0	1	0	0	0	0.0114442
11133	1529.68	2	0	1	0	0	0	0.0114359
11135	1529.71	2	0	1	0	0	0	0.0114237
11137	1529.75	2	0	1	0	0	0	0.011424
11139	1529.78	2	0	1	0	0	0	0.0114268
11141	1529.81	2	0	1	0	0	0	0.0113818
11143	1529.85	2	0	1	0	0	0	0.0114212
11145	1529.88	2	0	1	0	0	0	0.0113905
11147	1529.91	2	0	1	0	0	0	0.0114254
11149	1529.95	2	0	1	0	0	0	0.0113874
11151	1529.98	2	0	1	0	0	0	0.011401
11153	1530.01	2	0	1	0	0	0	0.0114523
11155	1530.05	2	0	1	0	0	0	0.0114286
11157	1530.08	2	0	1	0	0	0	0.0114205
11159	1530.11	2	0	1	0	0	0	0.0114261
11161	1530.15	2	0	1	0	0	0	0.0114233
11163	1530.18	2	0	1	0	0	0	0.0113613
11165	1530.21	2	0	1	0	0	0	0.0113595
11167	1530.25	2	0	1	0	0	0	0.0114299
11169	1530.28	2	0	1	0	0	0	0.0113891
11171	1530.31	2	0	1	0	0	0	0.0114341
11173	1530.35	2	0	1	0	0	0	0.0114143
11175	1530.38	2	0	1	0	0	0	0.0114205
11177	1530.41	2	0	1	0	0	0	0.0114362
11179	1530.45	2	0	1	0	0	0	0.011402
11181	1530.48	2	0	1	0	0	0	0.011424
11183	1530.51	2	0	1	0	0	0	0.0113846
11185	1530.55	2	0	1	0	0	0	0.0114376
11187	1530.58	2	0	1	0	0	0	0.0115241
11189	1530.61	2	0	1	0	0	0	0.0115583
11191	1530.65	2	0	1	0	0	0	0.0115715
11193	1530.68	2	0	1	0	0	0	0.0115398
11195	1530.71	2	0	1	0	0	0	0.0115802
11197	1530.75	2	0	1	0	0	0	0.0115509
11199	1530.78	2	0	1	0	0	0	0.0115415
11201	1530.81	2	0	1	0	0	0	0.0115886
11203	1530.85	2	0	1	0	0	0	0.0115928
11205	1530.88	2	0	1	0	0	0	0.0115757
11207	1530.91	2	0	1	0	0	0	0.0115593
11209	1530.95	2	0	1	0	0	0	0.011515
11211	1530.98	2	0	1	0	0	0	0.0115429
11213	1531.01	2	0	1	0	0	0	0.0115412
11215	1531.05	2	0	1	0	0	0	0.0115199
11217	1531.08	2	0	1	0	0	0	0.0115569
11219	1531.11	2	0	1	0	0	0	0.0114955
11221	1531.15	2	0	1	0	0	0	0.0115377
11223	1531.18	2	0	1	0	0	0	0.0115562
11225	1531.21	2	0	1	0	0	0	0.0115136
11227	1531.25	2	0	1	0	0	0	0.0115077
11229	1531.28	2	0	1	0	0	0	0.0115346
11231	1531.31	2	0	1	0	0	0	0.0115077
11233	1531.35	2	0	1	0	0	0	0.011583
11235	1531.38	2	0	1	0	0	0	0.0115823
11237	1531.41	2	0	1	0	0	0	0.0115987
11239	1531.45	2	0	1	0	0	0	0.0115593
11241	1531.48	2	0	1	0	0	0	0.0115475
11243	1531.51	2	0	1	0	0	0	0.0115408
11245	1531.55	2	0	1	0	0	0	0.0115377
11247	1531.58	2	0	1	0	0	0	0.0115373
11249	1531.61	2	0	1	0	0	0	0.0115157
11251	1531.65	2	0	1	0	0	0	0.0115834
11253	1531.68	2	0	1	0	0	0	0.0115722
11255	1531.71	2	0	1	0	0	0	0.0115886
11257	1531.75	2	0	1	0	0	0	0.0115471
11259	1531.78	2	0	1	0	0	0	0.0115492
11261	1531.81	2	0	1	0	0	0	0.0115816
11263	1531.85	2	0	1	0	0	0	0.0116033
11265	1531.88	2	0	1	0	0	0	0.0115942
11267	1531.91	2	0	1	0	0	0	0.0116165
11269	1531.95	2	0	1	0	0	0	0.0116364
11271	1531.98	2	0	1	0	0	0	0.0116019
11273	1532.01	2	0	1	0	0	0	0.0116116
11275	1532.05	2	0	1	0	0	0	0.0115788
11277	1532.08	2	0	1	0	0	0	0.0115834
11279	1532.11	2	0	1	0	0	0	0.0116381
11281	1532.15	2	0	1	0	0	0	0.0115959
11283	1532.18	2	0	1	0	0	0	0.011545
11285	1532.21	2	0	1	0	0	0	0.0115457
11287	1532.25	2	0	1	0	0	0	0.0115726
11289	1532.28	2	0	1	0	0	0	0.0115593
11291	1532.31	2	0	1	0	0	0	0.0115736
11293	1532.35	2	0	1	0	0	0	0.0115272
11295	1532.38	2	0	1	0	0	0	0.0115067
11297	1532.41	2	0	1	0	0	0	0.0115426
11299	1532.45	2	0	1	0	0	0	0.0115694
11301	1532.48	2	0	1	0	0	0	0.0115199
11303	1532.51	2	0	1	0	0	0	0.0115154
11305	1532.55	2	0	1	0	0	0	0.0115356
11307	1532.58	2	0	1	0	0	0	0.0114952
11309	1532.61	2	0	1	0	0	0	0.0115503
11311	1532.65	2	0	1	0	0	0	0.0115363
11313	1532.68	2	0	1	0	0	0	0.011491
11315	1532.71	2	0	1	0	0	0	0.0115328
11317	1532.75	2	0	1	0	0	0	0.0114903
11319	1532.78	2	0	1	0	0	0	0.0115516
11321	1532.81	2	0	1	0	0	0	0.0115248
11323	1532.85	2	0	1	0	0	0	0.0115663
11325	1532.88	2	0	1	0	0	0	0.0115523
11327	1532.91	2	0	1	0	0	0	0.0115799
11329	1532.95	2	0	1	0	0	0	0.0115562
11331	1532.98	2	0	1	0	0	0	0.011515
11333	1533.01	2	0	1	0	0	0	0.0115764
11335	1533.05	2	0	1	0	0	0	0.0115705
11337	1533.08	2	0	1	0	0	0	0.0115973
11339	1533.11	2	0	1	0	0	0	0.011582
11341	1533.15	2	0	1	0	0	0	0.0115743
11343	1533.18	2	0	1	0	0	0	0.0115942
11345	1533.21	2	0	1	0	0	0	0.0115503
11347	1533.25	2	0	1	0	0	0	0.0116012
11349	1533.28	2	0	1	0	0	0	0.0116113
11351	1533.31	2	0	1	0	0	0	0.0115544
11353	1533.35	2	0	1	0	0	0	0.0115244
11355	1533.38	2	0	1	0	0	0	0.0115921
11357	1533.41	2	0	1	0	0	0	0.0115635
11359	1533.45	2	0	1	0	0	0	0.0115774
11361	1533.48	2	0	1	0	0	0	0.011568
11363	1533.51	2	0	1	0	0	0	0.0115611
11365	1533.55	2	0	1	0	0	0	0.0115645
11367	1533.58	2	0	1	0	0	0	0.011537
11369	1533.61	2	0	1	0	0	0	0.0115258
11371	1533.65	2	0	1	0	0	0	0.011598
11373	1533.68	2	0	1	0	0	0	0.0115942
11375	1533.71	2	0	1	0	0	0	0.0115628
11377	1533.75	2	0	1	0	0	0	0.0115666
11379	1533.78	2	0	1	0	0	0	0.0116085
11381	1533.81	2	0	1	0	0	0	0.0116033
11383	1533.85	2	0	1	0	0	0	0.0116193
11385	1533.88	2	0	1	0	0	0	0.0115984
11387	1533.91	2	0	1	0	0	0	0.0115907
11389	1533.95	2	0	1	0	0	0	0.0115935
11391	1533.98	2	0	1	0	0	0	0.01159
11393	1534.01	2	0	1	0	0	0	0.0115652
11395	1534.05	2	0	1	0	0	0	0.0115987
11397	1534.08	2	0	1	0	0	0	0.0116343
11399	1534.11	2	0	1	0	0	0	0.011628
11401	1534.15	2	0	1	0	0	0	0.0116409
11403	1534.18	2	0	1	0	0	0	0.0117019
11405	1534.21	2	0	1	0	0	0	0.0117079
11407	1534.25	2	0	1	0	0	0	0.01165
11409	1534.28	2	0	1	0	0	0	0.0116765
11411	1534.31	2	0	1	0	0	0	0.0116245
11413	1534.35	2	0	1	0	0	0	0.0116249
11415	1534.38	2	0	1	0	0	0	0.0116395
11417	1534.41	2	0	1	0	0	0	0.0116127
11419	1534.45	2	0	1	0	0	0	0.0116242
11421	1534.48	2	0	1	0	0	0	0.0116123
[truncated: 7,157 more rows]

## Sheet: Mouse 2_KeyDow Signal
down	1658.441664	18859	54049000.01	00:49.00

## Sheet: Mouse 2_Velocity Signal
0
1.78103
4.58189
2.69865
2.32697
1.18133
1.05949
1.16943
2.10206
0.780831
0.101323
0.0602612
1.00983
3.01993
2.35784
1.15728
0.609497
1.19734
0.966821
1.55941
2.66659
1.4715
2.80197
5.71528
5.65237
7.39879
8.52083
12.1393
10.4313
13.1582
11.7778
12.45
12.1676
10.3332
10.4566
5.1221
3.96515
4.15151
4.06194
3.57238
3.93087
3.56036
3.59791
3.63374
3.45674
1.09842
1.55359
3.37419
3.70026
4.76137
2.82856
6.85967
5.82838
5.25193
8.86259
9.30994
7.69353
9.11628
3.70573
2.83427
2.14252
2.24213
6.03197
4.42479
6.39536
6.70761
6.87145
6.52562
7.63452
5.682
3.303
0.46809
1.62965
1.02593
0.832587
0.727268
5.70563
1.57154
1.44704
3.16259
3.66026
4.83124
5.26545
4.08046
4.05269
7.34657
3.13476
1.8964
1.67282
0.332399
0.788087
1.01675
1.31123
1.82002
3.57137
2.59681
0.967164
1.76582
1.90804
0.32257
0.672571
1.4778
2.20672
1.1015
1.81401
3.67321
2.33999
0.916816
1.35584
2.10048
0.951391
0.489228
1.25269
1.72298
1.46704
0.402748
0.139581
2.37901
2.43062
1.17411
1.08412
4.22468
1.46223
0.674632
0.36022
0.41582
0.725164
0.255373
0.570229
0.704818
2.712
1.84476
1.57178
1.51663
0.652972
0.420344
0.220461
1.11077
1.47876
1.13357
1.22634
0.929347
0.113772
0.702668
0.455587
0.499287
2.65967
0.764904
1.29055
0.922989
2.86716
0.465334
0.72829
1.00431
0.795719
1.27745
5.17535
3.27502
2.14255
2.12628
0.922553
0.281948
0.91603
0.59439
1.32166
0.300345
0.292364
1.07391
1.09354
1.61762
0.185011
0.180265
0.138751
2.33185
0.0402281
0.232832
2.35617
0.100725
0.0795227
2.09593
1.86872
2.22097
1.50251
0.48031
0.997118
1.61112
1.22302
1.57459
1.62191
3.63042
5.99678
8.05077
6.1642
8.27796
9.51005
6.47767
4.08789
3.12816
0.931403
1.1485
1.47544
0.712837
0.67072
0.53047
1.35921
2.22957
1.98054
0.351103
0.709545
0.410564
2.89918
0.649365
0.857181
0.875657
1.89397
4.2974
3.56769
4.13286
5.17539
5.03293
4.46885
3.9197
4.3422
3.51171
2.54671
4.22754
6.07154
1.77728
0.683534
1.59809
2.20391
7.02752
8.93535
9.65913
7.55598
5.7935
3.76753
1.36391
0.689384
0.118829
0.159886
0.124743
0.146491
0.107386
0.164383
1.69902
1.68093
2.84381
2.91343
4.34346
3.03899
2.24102
3.91956
2.67841
3.0059
4.69268
2.9642
1.84025
0.834584
0.393084
0.160796
0.295735
0.184688
0.390422
0.148147
0.305781
1.53357
0.910791
2.61994
1.90097
1.11694
1.02241
0.797321
1.42038
0.742166
1.07355
4.55566
2.28959
2.7
0.577469
0.674785
0.505172
0.354063
0.186871
10.7789
0.602929
2.19059
3.75121
1.06078
1.18944
1.98033
0.872789
1.65413
0.90384
1.1925
0.122517
0.780016
5.73199
1.6011
1.97951
1.33999
0.656456
0.288379
2.45315
4.38647
1.5089
0.226569
0.160281
1.76638
1.80344
0.523059
0.21924
0.0736489
0.0748014
0.0630348
3.1794
0.265282
1.1831
1.56431
0.630716
0.29924
0.144439
0.373281
0.214552
0.125917
0.155074
0.0234974
0.00540589
0.0738384
0.0502327
0.0744291
0.0864354
0.0560819
2.84685
0.29936
0.175121
3.6954
4.66069
0.909537
0.475006
0.340698
0.373536
0.222207
2.01851
4.82746
4.27602
0.918817
1.34895
0.832474
1.83831
0.709735
2.4227
0.748264
1.28892
0.465811
1.00684
0.41095
0.148296
0.890968
0.833072
0.454212
0.299611
0.509097
0.132581
0.182581
0.317237
0.527518
0.220398
0.583807
0.624914
0.292515
1.40651
0.611649
0.670013
0.525036
0.134916
0.284465
0.205626
0.33017
0.290061
0.223952
0.0741365
0.0883562
0.485196
0.197396
0.233689
0.0897772
0.17204
0.305096
0.212057
0.374276
0.507503
1.54152
0.181122
0.516029
0.440179
0.523671
1.2388
0.619012
0.507062
0.09914
0.228586
1.45638
0.919459
0.379534
0.56807
0.256439
0.335644
2.48646
2.55525
1.19953
0.155596
1.79304
1.6594
0.243759
1.17295
0.484535
1.60111
1.54366
0.593727
0.311858
0.339432
0.11388
0.172641
1.6995
1.78636
0.180289
0.475972
0.575594
1.23186
0.529802
0.411864
0.352995
0.382662
0.233418
0.264092
0.185717
0.159831
0.174819
0.347417
0.206605
0.090348
0.563402
0.287975
0.250964
0.246414
0.111706
0.114166
0.157855
0.137895
0.250976
0.16356
0.203652
0.0631223
0.0373024
0.33376
0.460083
0.631689
0.270057
0.23776
0.0950084
0.157617
0.426179
0.0262591
0.264348
0.169216
0.195623
0.176641
0.570914
0.330007
0.201089
0.199995
0.255761
0.641332
0.562374
0.417394
0.145844
0.158077
0.802076
0.358664
0.153863
0.391836
0.350343
0.248341
0.126764
0.467905
0.478841
0.322866
0.491475
0.407395
0.461226
0.697027
0.4728
0.814483
0.14792
0.451466
0.821194
0.521903
0.470069
1.15768
0.145097
0.831575
0.337575
1.10258
0.705691
1.427
1.06882
0.52861
0.475531
0.459755
0.226981
0.0842892
0.336369
0.836737
0.382801
0.656538
0.356783
1.53199
0.114098
0.44947
1.05757
0.610428
0.418903
0.210718
0.16931
0.319322
0.444033
0.253302
1.07083
0.260725
0.494604
1.13203
0.856426
0.321887
0.922076
0.511518
0.472962
0.780213
0.16511
0.537508
0.108929
0.0872084
0.226431
1.08702
0.415795
0.508031
0.465116
0.438607
0.905616
0.150317
0.258073
0.628829
0.40878
0.514781
0.627435
0.0601636
0.618759
0.679586
0.501097
0.943482
0.381702
1.06409
1.14881
1.20395
0.28462
0.804047
0.138347
0.0100435
0.0806291
0.0715157
0.0526895
2.76564
2.04589
0.0594493
0.385089
0.735448
0.164767
0.124073
0.844803
0.982725
1.4307
0.908319
1.06637
0.360061
0.0799034
0.571994
0.676338
0.587698
0.374672
2.22321
1.88264
0.794126
0.365273
0.475754
0.440458
0.662147
0.150848
0.0570461
0.473705
1.20019
0.563022
0.0612515
0.635207
0.572551
0.17073
0.282788
0.335731
0.601875
1.04133
1.51472
0.515405
0.552264
0.340848
0.784256
0.588294
1.26382
0.68495
0.870256
0.182018
0.978022
0.522184
0.759277
0.733359
0.643051
0.368203
0.458788
0.299172
0.118195
0.0764858
0.501698
0.26186
0.304197
0.0943622
0.501322
0.194305
0.24136
0.132907
0.274005
0.248438
0.0632252
0.060654
0.309034
0.122727
0.124593
0.0999975
0.372866
1.15432
0.195592
0.353278
0.595231
0.595453
0.788557
0.992799
0.904269
1.74853
2.5457
1.87151
0.842789
0.892606
0.321186
0.0778231
1.04662
0.508484
1.76871
0.532217
0.606524
0.991213
5.62929
0.316499
0.090624
0.0650127
0.0898027
0.854795
4.22614
0.88092
0.578669
3.19014
2.03016
1.01728
0.560486
1.05076
0.585405
3.89139
2.39025
2.92296
3.14991
0.423094
2.279
5.0382
3.17978
5.46355
3.27224
1.33973
0.43234
0.92872
0.303082
0.661715
0.302575
0.27494
0.54765
0.28881
0.16866
0.0555321
0.246453
0.474549
0.331384
0.576183
0.566562
0.171141
1.89894
3.18531
1.52356
0.954729
0.253737
0.313132
0.150797
0.143195
0.572376
0.116127
0.0354532
0.0347794
0.176798
0.445125
0.704348
0.783588
0.6047
0.494329
0.617063
1.38152
2.38027
0.461133
0.213909
0.287049
0.193066
0.4424
0.216641
0.132178
0.250387
0.40355
0.299182
0.0382086
0.0848168
0.0518754
0.0591101
0.0349265
0.0790561
0.0330424
0.282577
2.28422
1.28755
1.48159
0.092017
0.545287
1.41513
1.28427
0.120326
0.257299
0.163562
0.398636
2.36772
1.4739
0.592196
0.333939
1.88714
0.123184
0.535914
0.310535
0.234483
0.0142958
0.0317602
0.0763692
0.061549
0.078784
0.071866
0.0795332
0.0507572
0.178823
0.284988
0.704559
0.805948
0.773674
0.201251
0.277385
0.118479
0.192191
0.351096
0.0520914
1.23278
0.0753237
0.110094
1.1374
0.0689662
0.125809
1.26704
1.20348
6.52449
1.07302
0.0691899
0.102525
0.166571
4.5497
0.315662
0.386848
0.386398
2.20185
2.53418
1.28091
3.44913
5.34713
4.57344
3.49093
3.18383
1.41489
1.21738
0.899329
0.938353
0.573492
0.4418
0.27905
1.71061
0.843177
0.396883
0.297948
0.688358
0.184668
0.158562
0.0804993
1.41173
0.527745
0.311762
0.906577
0.765596
2.34981
1.45537
1.07068
1.53735
2.90434
3.99599
6.46426
4.83038
5.40153
2.80288
1.29649
0.888152
2.52096
0.107802
0.0463927
0.230675
0.0778051
0.0804112
1.83221
1.68049
1.24339
1.78134
0.692432
0.244304
0.488064
0.15155
0.138472
0.0694307
0.123934
0.127375
0.132218
0.103331
0.0335381
0.0943009
0.602019
2.92809
1.54372
1.36777
1.0856
0.425935
0.252995
0.217042
0.0635994
0.657036
0.0881607
0.0446082
0.116793
0.164433
0.105074
0.014477
0.0437128
0.0395315
0.0160356
0.0578848
0.0374754
0.00615593
0.045821
0.086808
0.0931015
0.696701
1.22138
0.397266
0.2179
0.29152
0.380314
0.380435
1.22807
2.56195
2.84791
1.85062
0.267584
3.32202
4.85027
8.13306
5.96227
7.00825
6.32593
3.5256
5.44274
3.35705
2.48067
0.327679
0.165177
0.239009
0.909103
0.920183
0.512232
1.8207
0.621768
1.32912
0.457035
0.0132738
0.186397
0.595303
0.735667
0.407819
0.253618
1.33386
0.848947
2.0199
1.76977
1.10522
1.15987
0.635375
0.889668
1.75078
2.40467
3.10839
3.11015
1.80905
0.841643
0.0425751
1.96381
4.35201
6.18226
8.10432
7.01222
7.83647
5.94734
3.81968
6.26728
7.25316
5.06293
3.4209
5.6796
6.58561
6.12376
6.0347
6.5579
6.53172
3.20042
5.05917
4.47504
1.94647
0.731655
0.448787
1.28086
0.542374
0.353101
0.281488
0.271219
0.121915
0.881376
0.31005
0.786142
1.47542
2.84483
1.299
0.957865
0.793762
0.736692
1.83106
3.02715
3.11326
1.70432
1.27487
1.62871
1.69761
0.963043
1.84538
0.539426
0.291679
0.169058
1.0094
1.60319
1.15063
1.49992
1.74841
0.507485
0.360749
0.641561
0.441534
1.20008
6.69775
4.28529
3.31336
1.76347
1.35904
0.945782
0.588829
0.207037
0.47604
1.55848
0.639946
1.39282
0.681367
0.522094
0.404919
0.504046
0.596609
0.404341
1.09383
0.280021
1.24261
0.963424
0.179638
2.88566
0.784623
2.46707
1.82868
0.692557
0.291844
1.03447
0.398013
0.712855
0.595134
0.449916
0.890746
1.53369
1.05577
0.492884
0.308499
0.223056
0.424772
0.235874
0.249988
0.286352
0.288106
0.95365
0.576125
0.584625
0.501878
1.46291
0.0340431
0.684318
0.14784
1.02605
0.494113
0.929614
0.577422
0.267549
0.0643944
0.822759
0.953212
0.21427
0.475838
0.184429
0.229483
0.149
0.335631
0.0941153
0.14476
0.186523
0.207321
0.737952
0.884943
1.96225
0.619839
0.424641
1.80504
1.16721
1.30176
0.385854
1.35204
1.32708
0.450894
0.66201
0.43553
0.868186
0.270908
0.49146
0.0833826
0.0184045
0.0470185
0.0622341
0.130553
0.872766
0.648052
1.0709
0.405508
0.112941
1.68098
1.46075
0.358013
1.46877
0.308669
0.608674
1.13895
0.290526
0.220467
0.802953
0.652535
0.030113
0.147376
0.91034
2.47081
3.07786
2.86502
1.67092
3.05448
1.15581
1.60939
0.863329
0.494009
0.611577
1.2738
2.495
3.41905
3.82601
3.85492
3.73054
6.01668
5.50187
7.31593
4.59088
2.91924
4.60605
9.23302
8.71514
6.9959
3.21878
5.25472
4.68317
2.25782
2.30306
5.15186
7.66734
7.02198
5.43452
4.78797
2.7652
1.19785
0.225179
2.31252
0.523907
0.94422
1.50795
0.304171
0.606777
0.445593
2.41669
0.374059
0.401181
0.5876
3.36997
1.26733
4.38352
1.08109
0.175404
0.426039
4.64022
4.19486
4.50742
4.32962
1.93538
1.29179
0.396774
1.15359
2.71404
3.01862
2.16339
2.25285
1.24483
2.1525
0.964228
0.360254
0.749933
0.457534
0.855396
0.746034
1.04003
0.129187
0.650535
0.820762
0.103269
1.74503
1.65469
0.398561
1.09952
1.13222
1.63498
2.36579
2.642
0.986074
0.739834
0.700441
0.233391
0.509125
0.145682
1.05056
0.150799
0.995754
3.74686
2.7816
3.67018
4.09393
4.56257
3.95347
5.09582
4.83019
4.95809
6.97722
6.9021
9.13578
9.53714
7.21368
6.83812
7.03868
7.55766
4.79892
1.31054
0.981201
0.494156
0.703235
0.512349
2.31437
1.80352
2.09379
0.958279
1.15066
3.49171
7.0795
5.93708
7.0766
8.28372
5.66103
4.95753
8.29049
4.52606
0.708687
0.847221
1.82441
1.39463
0.756801
0.718886
0.355107
0.511495
0.587807
1.44922
0.586062
0.751091
0.8369
1.06412
0.573771
2.07008
0.264413
0.107924
0.175291
0.256803
0.591805
0.34302
0.218656
0.126686
0.174882
0.138453
0.655363
0.401247
0.17323
0.489554
1.17425
1.85407
1.57781
3.14499
2.09297
1.20771
1.36603
1.84423
0.197818
3.26689
2.99713
2.39957
4.29921
4.47162
4.30263
4.11691
5.48482
6.50349
2.79626
1.28214
0.632244
3.01421
5.28968
7.27357
11.4682
13.6442
14.4983
15.6952
13.9279
11.7066
6.40991
2.65097
6.2293
4.29178
1.45742
0.620912
0.0805533
0.648566
1.47578
1.22673
1.1782
1.12273
0.952721
1.29589
1.18948
1.88721
1.01334
0.376305
0.215917
0.29721
0.347674
0.379471
0.210414
0.0774886
0.0881021
0.0844665
0.0400072
0.106591
0.913818
0.354001
0.207025
0.326554
0.258824
0.425541
0.513035
0.410866
0.107882
0.247394
0.0887541
1.95176
0.0494249
1.43883
0.128763
0.399278
0.49906
0.547403
0.500433
0.479887
0.083238
0.206449
0.0819399
0.209081
0.276884
0.165445
0.0768571
1.03072
1.43597
0.998142
0.661798
1.00451
0.984062
1.0198
0.372105
0.62621
1.46551
1.91583
2.76059
2.5832
4.07778
2.62119
0.86606
0.58128
0.463683
1.01271
0.177143
0.198649
0.0638583
0.089051
0.21356
0.0217015
0.126945
0.0534014
0.194209
0.818603
0.25543
0.124222
0.306047
0.18844
0.287809
0.395366
0.207369
0.0585929
0.0194669
0.116715
0.126348
0.136125
0.208899
1.40929
0.0698871
0.162417
0.0620372
0.0257418
0.0338933
0.0617757
0.424653
0.0554063
1.50462
0.0961293
0.182251
0.845652
1.14968
1.54346
1.05055
0.619439
0.381534
1.35451
0.0594175
0.650142
0.121312
0.412877
0.158383
0.159336
0.445077
0.966404
0.473454
0.150446
0.0503377
0.077892
0.091474
0.061534
0.163313
0.0533176
0.141021
0.456308
2.59634
1.80661
0.202986
1.64009
1.73445
0.887216
1.06896
1.97215
4.3564
3.91341
3.74307
1.86456
4.42756
5.22211
6.71508
8.23501
8.31232
6.74621
5.8915
3.02513
0.249108
0.158874
0.0526962
0.0191487
0.146945
0.252077
0.103966
0.0645955
0.140341
0.0640202
0.358325
0.0659403
0.329258
0.46695
1.6012
1.56945
2.84509
3.39723
2.61861
0.861453
0.188919
0.342071
0.120932
0.248442
0.066467
0.142653
0.156521
0.0886243
0.028089
0.027427
0.0205269
0.124818
0.080947
0.276613
2.519
3.67945
4.69472
4.00466
5.39498
5.5302
4.45771
2.3241
0.650394
0.950635
1.49971
0.486446
0.199297
0.147705
0.0197586
0.383358
0.624226
2.36093
5.6868
3.07527
1.53828
5.08272
4.13132
4.54887
1.27296
0.53971
0.0911516
3.69222
0.0368572
2.2684
1.94005
3.28749
0.125828
0.73553
2.20809
1.72292
1.27574
1.34103
2.85909
2.22179
0.793941
4.25859
1.22212
1.55121
1.29811
1.86883
0.752405
0.0680439
0.547619
3.79599
4.88636
3.26211
1.72418
0.767357
1.33658
2.85868
1.10744
0.0499846
2.64342
0.538124
1.60289
0.821969
2.13516
0.941559
0.227431
0.326865
0.257823
0.256668
0.203478
0.113951
0.431261
0.290128
0.258749
0.664446
0.214205
1.15152
0.277193
1.13439
0.588881
0.724321
1.46815
3.07766
4.27673
0.666333
1.23818
0.748861
0.8691
1.43612
0.411439
0.358474
0.566753
1.75058
2.05129
1.48592
0.327351
0.8843
2.03077
1.17264
0.660854
0.453156
0.468193
0.295217
1.0586
0.0701867
0.187066
1.23674
0.121377
0.065648
0.066688
0.553954
1.92343
2.49083
0.820948
2.1446
1.08429
1.1776
2.33022
4.29949
4.40565
6.85615
9.62799
10.6987
11.1127
12.0322
6.87876
5.03807
1.36559
0.183602
0.0996347
0.28221
0.141783
0.141335
0.217109
0.122507
0.00880274
0.684081
0.0532024
0.0565289
0.0348513
0.0960026
0.419628
0.579031
0.206227
0.1035
0.0536553
0.13379
0.067108
0.541382
0.544158
2.62789
4.25515
9.52805
8.81784
12.0352
9.07246
4.9292
0.551898
14.0269
0.48523
3.42538
0.481271
0.40094
0.0668584
0.419556
2.72136
0.0260311
0.373521
0.358224
2.60532
2.51726
1.2151
1.2283
0.580928
0.150181
1.33165
1.62545
2.04003
2.05218
0.71854
0.120893
0.107212
0.149676
1.67078
1.20508
0.437214
1.27657
0.710299
0.982666
0.60555
1.3203
1.08696
1.63399
0.0608722
0.0749235
1.03092
0.217978
0.834071
3.22493
1.70716
0.123741
1.34588
1.92256
0.837649
0.35508
1.00138
0.692723
0.382242
0.494864
0.624521
0.66023
0.0580545
0.0724188
1.39323
1.12988
1.80402
0.611656
0.0592356
0.0313405
0.342826
0.539594
0.717849
0.58137
0.256411
0.349236
0.44717
0.280991
0.300931
0.17102
0.162169
0.621333
0.0522601
0.101129
0.13543
0.050906
0.442838
0.875241
0.136421
0.445118
0.319784
1.37825
0.805385
0.210777
0.019131
0.435551
0.0560036
0.198902
0.50644
0.771299
0.593284
0.93913
2.05705
1.58432
2.41525
0.125015
1.16392
0.877806
1.25715
1.05674
0.762428
0.338149
0.159041
0.166046
0.568622
1.18801
1.88271
0.304659
0.713608
0.725711
0.795724
0.490789
0.221798
0.578312
0.288629
0.835668
0.845772
0.383604
0.661385
0.571477
0.0691159
1.16283
0.788524
0.298046
0.959721
0.795008
0.819225
1.22294
1.62517
0.481651
0.243179
1.40036
1.08818
1.49783
1.41156
0.606799
1.4956
0.476825
0.505065
0.376176
0.141662
0.253779
5.04904
2.92228
3.52297
3.08671
1.17628
0.507539
0.854922
3.93577
2.74795
2.50576
0.439252
0.58247
0.726687
0.157926
0.451499
0.742226
0.455311
2.04267
0.422878
0.494027
0.442882
0.29222
0.096546
0.52644
0.651312
0.222819
1.63239
0.273253
1.03441
0.0725569
1.34562
0.0967335
0.062677
0.287796
0.089993
0.28321
1.93931
1.59805
1.15099
0.248238
1.56827
1.89239
0.684596
0.692945
0.24627
1.25731
0.064851
1.10356
1.97301
0.421608
0.121198
0.0899154
0.314464
1.55413
1.85607
3.23346
3.07206
2.91676
3.3207
3.7196
1.38713
2.54219
3.10741
0.317572
0.762499
0.24209
0.176101
0.781977
0.595813
1.27976
2.68112
2.68065
3.39667
3.02265
3.21217
1.95073
1.21777
2.43085
4.61171
6.71173
3.89247
3.75679
2.58786
1.94696
3.23061
4.44686
5.1178
2.34272
0.985445
0.159573
2.56581
4.75931
6.2149
9.13049
9.75815
7.28345
6.57709
8.2752
6.93461
6.09176
7.19972
3.80918
0.873439
1.22771
0.895205
3.86683
18.4848
9.98272
15.1951
15.2702
11.8402
17.6998
17.58
18.6093
16.7096
14.8237
14.452
400.447
1.2822
2.3904
1.05365
2.24239
2.78172
1.02147
0.554078
0.70524
2.40777
0.105109
1.16064
0.946315
1.21495
0.877724
0.479555
2.92419
1.86868
2.01836
1.37237
2.10215
6.73707
0.915115
2.54452
1.82637
0.271561
0.0234289
0.280413
0.701186
2.61483
1.88695
3.01187
3.19139
3.24631
4.80491
3.67981
3.54312
5.93964
3.81054
4.60239
3.40538
3.1698
5.47026
3.77384
4.5694
6.41826
3.85482
3.81737
3.47295
2.65461
3.37471
0.283411
0.0575347
0.034462
0.0442475
1.45127
1.60881
2.08757
0.0874172
0.010519
0.87751
3.15261
5.31552
1.13543
0.0870277
0.0571587
1.69291
2.02594
3.0283
0.0618723
0.0266348
2.11817
3.83006
1.58972
0.176101
1.04334
4.5922
3.00223
4.32617
0.227346
0.0484336
3.56725
3.57313
1.97036
[truncated: 1,036 more rows]

## Sheet: Mouse 3_415 Signal
FrameCounter	Timestamp	LedState	Stimulation	Output0	Output1	Input0	Input1	Region0G
7412	5553.81	1	0	1	0	0	0	0.017026
7414	5553.85	1	0	1	0	0	0	0.0169033
7416	5553.88	1	0	1	0	0	0	0.0169162
7418	5553.91	1	0	1	0	0	0	0.0170672
7420	5553.95	1	0	1	0	0	0	0.0170201
7422	5553.98	1	0	1	0	0	0	0.017055
7424	5554.01	1	0	1	0	0	0	0.0169723
7426	5554.05	1	0	1	0	0	0	0.0171359
7428	5554.08	1	0	1	0	0	0	0.0170783
7430	5554.11	1	0	1	0	0	0	0.0169392
7432	5554.15	1	0	1	0	0	0	0.01711
7434	5554.18	1	0	1	0	0	0	0.0169496
7436	5554.21	1	0	1	0	0	0	0.0169521
7438	5554.25	1	0	1	0	0	0	0.0170337
7440	5554.28	1	0	1	0	0	0	0.0171739
7442	5554.31	1	0	1	0	0	0	0.0172841
7444	5554.35	1	0	1	0	0	0	0.0170975
7446	5554.38	1	0	1	0	0	0	0.0171941
7448	5554.41	1	0	1	0	0	0	0.0172272
7450	5554.45	1	0	1	0	0	0	0.0171903
7452	5554.48	1	0	1	0	0	0	0.0171892
7454	5554.51	1	0	1	0	0	0	0.0171456
7456	5554.55	1	0	1	0	0	0	0.0171198
7458	5554.58	1	0	1	0	0	0	0.0171491
7460	5554.61	1	0	1	0	0	0	0.0171651
7462	5554.65	1	0	1	0	0	0	0.0172028
7464	5554.68	1	0	1	0	0	0	0.0170483
7466	5554.71	1	0	1	0	0	0	0.0171676
7468	5554.75	1	0	1	0	0	0	0.0171899
7470	5554.78	1	0	1	0	0	0	0.0171857
7472	5554.81	1	0	1	0	0	0	0.0172827
7474	5554.85	1	0	1	0	0	0	0.0172115
7476	5554.88	1	0	1	0	0	0	0.0171798
7478	5554.91	1	0	1	0	0	0	0.017177
7480	5554.95	1	0	1	0	0	0	0.017184
7482	5554.98	1	0	1	0	0	0	0.0171899
7484	5555.01	1	0	1	0	0	0	0.0171655
7486	5555.05	1	0	1	0	0	0	0.0173147
7488	5555.08	1	0	1	0	0	0	0.0173894
7490	5555.11	1	0	1	0	0	0	0.0173705
7492	5555.15	1	0	1	0	0	0	0.0173053
7494	5555.18	1	0	1	0	0	0	0.0173008
7496	5555.21	1	0	1	0	0	0	0.0173283
7498	5555.25	1	0	1	0	0	0	0.0173203
7500	5555.28	1	0	1	0	0	0	0.0172945
7502	5555.31	1	0	1	0	0	0	0.0172977
7504	5555.35	1	0	1	0	0	0	0.0172806
7506	5555.38	1	0	1	0	0	0	0.0172628
7508	5555.41	1	0	1	0	0	0	0.0172935
7510	5555.45	1	0	1	0	0	0	0.0172405
7512	5555.48	1	0	1	0	0	0	0.017283
7514	5555.51	1	0	1	0	0	0	0.0172649
7516	5555.55	1	0	1	0	0	0	0.0173364
7518	5555.58	1	0	1	0	0	0	0.017215
7520	5555.61	1	0	1	0	0	0	0.017253
7522	5555.65	1	0	1	0	0	0	0.0172279
7524	5555.68	1	0	1	0	0	0	0.017208
7526	5555.71	1	0	1	0	0	0	0.0172342
7528	5555.75	1	0	1	0	0	0	0.0173011
7530	5555.78	1	0	1	0	0	0	0.017328
7532	5555.81	1	0	1	0	0	0	0.017229
7534	5555.85	1	0	1	0	0	0	0.0172485
7536	5555.88	1	0	1	0	0	0	0.0172485
7538	5555.91	1	0	1	0	0	0	0.017223
7540	5555.95	1	0	1	0	0	0	0.0172157
7542	5555.98	1	0	1	0	0	0	0.0171916
7544	5556.01	1	0	1	0	0	0	0.0171763
7546	5556.05	1	0	1	0	0	0	0.0171711
7548	5556.08	1	0	1	0	0	0	0.0171686
7550	5556.11	1	0	1	0	0	0	0.0172209
7552	5556.15	1	0	1	0	0	0	0.0172168
7554	5556.18	1	0	1	0	0	0	0.0172049
7556	5556.21	1	0	1	0	0	0	0.0172541
7558	5556.25	1	0	1	0	0	0	0.0172474
7560	5556.28	1	0	1	0	0	0	0.0172792
7562	5556.31	1	0	1	0	0	0	0.0172467
7564	5556.35	1	0	1	0	0	0	0.017207
7566	5556.38	1	0	1	0	0	0	0.0172492
7568	5556.41	1	0	1	0	0	0	0.0172025
7570	5556.45	1	0	1	0	0	0	0.0172555
7572	5556.48	1	0	1	0	0	0	0.0172185
7574	5556.51	1	0	1	0	0	0	0.017193
7576	5556.55	1	0	1	0	0	0	0.0171393
7578	5556.58	1	0	1	0	0	0	0.0171359
7580	5556.61	1	0	1	0	0	0	0.0171861
7582	5556.65	1	0	1	0	0	0	0.0171644
7584	5556.68	1	0	1	0	0	0	0.017215
7586	5556.71	1	0	1	0	0	0	0.01726
7588	5556.75	1	0	1	0	0	0	0.0172586
7590	5556.78	1	0	1	0	0	0	0.0172453
7592	5556.81	1	0	1	0	0	0	0.0171735
7594	5556.85	1	0	1	0	0	0	0.0173046
7596	5556.88	1	0	1	0	0	0	0.0172987
7598	5556.91	1	0	1	0	0	0	0.0173085
7600	5556.95	1	0	1	0	0	0	0.0173137
7602	5556.98	1	0	1	0	0	0	0.0173228
7604	5557.01	1	0	1	0	0	0	0.0173001
7606	5557.05	1	0	1	0	0	0	0.0172945
7608	5557.08	1	0	1	0	0	0	0.0172084
7610	5557.11	1	0	1	0	0	0	0.0171533
7612	5557.15	1	0	1	0	0	0	0.017155
7614	5557.18	1	0	1	0	0	0	0.0170992
7616	5557.21	1	0	1	0	0	0	0.0170295
7618	5557.25	1	0	1	0	0	0	0.0171997
7620	5557.28	1	0	1	0	0	0	0.0172272
7622	5557.31	1	0	1	0	0	0	0.0172718
7624	5557.35	1	0	1	0	0	0	0.0173074
7626	5557.38	1	0	1	0	0	0	0.0171955
7628	5557.41	1	0	1	0	0	0	0.0170978
7630	5557.45	1	0	1	0	0	0	0.0170891
7632	5557.48	1	0	1	0	0	0	0.0170602
7634	5557.51	1	0	1	0	0	0	0.0169887
7636	5557.55	1	0	1	0	0	0	0.0170309
7638	5557.58	1	0	1	0	0	0	0.0170661
7640	5557.61	1	0	1	0	0	0	0.0169985
7642	5557.65	1	0	1	0	0	0	0.0169873
7644	5557.68	1	0	1	0	0	0	0.0170853
7646	5557.71	1	0	1	0	0	0	0.017116
7648	5557.75	1	0	1	0	0	0	0.0171048
7650	5557.78	1	0	1	0	0	0	0.0170748
7652	5557.81	1	0	1	0	0	0	0.0169838
7654	5557.85	1	0	1	0	0	0	0.0169263
7656	5557.88	1	0	1	0	0	0	0.0169699
7658	5557.91	1	0	1	0	0	0	0.0169123
7660	5557.95	1	0	1	0	0	0	0.0168729
7662	5557.98	1	0	1	0	0	0	0.0169381
7664	5558.01	1	0	1	0	0	0	0.0169608
7666	5558.05	1	0	1	0	0	0	0.0169263
7668	5558.08	1	0	1	0	0	0	0.0169451
7670	5558.11	1	0	1	0	0	0	0.0169326
7672	5558.15	1	0	1	0	0	0	0.0169496
7674	5558.18	1	0	1	0	0	0	0.0169765
7676	5558.21	1	0	1	0	0	0	0.0168576
7678	5558.25	1	0	1	0	0	0	0.016936
7680	5558.28	1	0	1	0	0	0	0.0168729
7682	5558.31	1	0	1	0	0	0	0.0169252
7684	5558.35	1	0	1	0	0	0	0.0169639
7686	5558.38	1	0	1	0	0	0	0.0169493
7688	5558.41	1	0	1	0	0	0	0.0169256
7690	5558.45	1	0	1	0	0	0	0.0169064
7692	5558.48	1	0	1	0	0	0	0.0169144
7694	5558.51	1	0	1	0	0	0	0.0169273
7696	5558.55	1	0	1	0	0	0	0.0169029
7698	5558.58	1	0	1	0	0	0	0.0168653
7700	5558.61	1	0	1	0	0	0	0.016844
7702	5558.65	1	0	1	0	0	0	0.016934
7704	5558.68	1	0	1	0	0	0	0.0168768
7706	5558.71	1	0	1	0	0	0	0.0168691
7708	5558.75	1	0	1	0	0	0	0.0169001
7710	5558.78	1	0	1	0	0	0	0.0168217
7712	5558.81	1	0	1	0	0	0	0.0168426
7714	5558.85	1	0	1	0	0	0	0.0168925
7716	5558.88	1	0	1	0	0	0	0.0169409
7718	5558.91	1	0	1	0	0	0	0.0168827
7720	5558.95	1	0	1	0	0	0	0.0168189
7722	5558.98	1	0	1	0	0	0	0.0169796
7724	5559.01	1	0	1	0	0	0	0.0170508
7726	5559.05	1	0	1	0	0	0	0.0169761
7728	5559.08	1	0	1	0	0	0	0.0169709
7730	5559.11	1	0	1	0	0	0	0.0169507
7732	5559.15	1	0	1	0	0	0	0.0169953
7734	5559.18	1	0	1	0	0	0	0.0170145
7736	5559.21	1	0	1	0	0	0	0.0169939
7738	5559.25	1	0	1	0	0	0	0.0170054
7740	5559.28	1	0	1	0	0	0	0.0169887
7742	5559.31	1	0	1	0	0	0	0.0169552
7744	5559.35	1	0	1	0	0	0	0.0169005
7746	5559.38	1	0	1	0	0	0	0.0170159
7748	5559.41	1	0	1	0	0	0	0.0168837
7750	5559.45	1	0	1	0	0	0	0.0168391
7752	5559.48	1	0	1	0	0	0	0.0168161
7754	5559.51	1	0	1	0	0	0	0.0167735
7756	5559.55	1	0	1	0	0	0	0.0168517
7758	5559.58	1	0	1	0	0	0	0.0167885
7760	5559.61	1	0	1	0	0	0	0.0168196
7762	5559.65	1	0	1	0	0	0	0.0167847
7764	5559.68	1	0	1	0	0	0	0.0167777
7766	5559.71	1	0	1	0	0	0	0.0167795
7768	5559.75	1	0	1	0	0	0	0.0168084
7770	5559.78	1	0	1	0	0	0	0.016919
7772	5559.81	1	0	1	0	0	0	0.0168837
7774	5559.85	1	0	1	0	0	0	0.0169127
7776	5559.88	1	0	1	0	0	0	0.0169109
7778	5559.91	1	0	1	0	0	0	0.0168621
7780	5559.95	1	0	1	0	0	0	0.0168119
7782	5559.98	1	0	1	0	0	0	0.0167851
7784	5560.01	1	0	1	0	0	0	0.0168046
7786	5560.05	1	0	1	0	0	0	0.0167617
7788	5560.08	1	0	1	0	0	0	0.0166958
7790	5560.11	1	0	1	0	0	0	0.0167425
7792	5560.15	1	0	1	0	0	0	0.0167453
7794	5560.18	1	0	1	0	0	0	0.0166602
7796	5560.21	1	0	1	0	0	0	0.0166822
7798	5560.25	1	0	1	0	0	0	0.0167275
7800	5560.28	1	0	1	0	0	0	0.0166822
7802	5560.31	1	0	1	0	0	0	0.016693
7804	5560.35	1	0	1	0	0	0	0.0167683
7806	5560.38	1	0	1	0	0	0	0.0167279
7808	5560.41	1	0	1	0	0	0	0.016708
7810	5560.45	1	0	1	0	0	0	0.0167638
7812	5560.48	1	0	1	0	0	0	0.0167324
7814	5560.51	1	0	1	0	0	0	0.0166979
7816	5560.55	1	0	1	0	0	0	0.0166818
7818	5560.58	1	0	1	0	0	0	0.0166979
7820	5560.61	1	0	1	0	0	0	0.0167509
7822	5560.65	1	0	1	0	0	0	0.0167094
7824	5560.68	1	0	1	0	0	0	0.0167366
7826	5560.71	1	0	1	0	0	0	0.0168067
7828	5560.75	1	0	1	0	0	0	0.0167415
7830	5560.78	1	0	1	0	0	0	0.0167021
7832	5560.81	1	0	1	0	0	0	0.0166972
7834	5560.85	1	0	1	0	0	0	0.016686
7836	5560.88	1	0	1	0	0	0	0.0166403
7838	5560.91	1	0	1	0	0	0	0.0166965
7840	5560.95	1	0	1	0	0	0	0.0167191
7842	5560.98	1	0	1	0	0	0	0.0167296
7844	5561.01	1	0	1	0	0	0	0.0167659
7846	5561.05	1	0	1	0	0	0	0.0167934
7848	5561.08	1	0	1	0	0	0	0.0168555
7850	5561.11	1	0	1	0	0	0	0.0168318
7852	5561.15	1	0	1	0	0	0	0.016897
7854	5561.18	1	0	1	0	0	0	0.0168876
7856	5561.21	1	0	1	0	0	0	0.0169224
7858	5561.25	1	0	1	0	0	0	0.0169357
7860	5561.28	1	0	1	0	0	0	0.0169012
7862	5561.31	1	0	1	0	0	0	0.0168482
7864	5561.35	1	0	1	0	0	0	0.0168945
7866	5561.38	1	0	1	0	0	0	0.0168492
7868	5561.41	1	0	1	0	0	0	0.0168276
7870	5561.45	1	0	1	0	0	0	0.0167038
7872	5561.48	1	0	1	0	0	0	0.0167188
7874	5561.51	1	0	1	0	0	0	0.0167945
7876	5561.55	1	0	1	0	0	0	0.0167889
7878	5561.58	1	0	1	0	0	0	0.0167565
7880	5561.61	1	0	1	0	0	0	0.0167798
7882	5561.65	1	0	1	0	0	0	0.0168021
7884	5561.68	1	0	1	0	0	0	0.0167708
7886	5561.71	1	0	1	0	0	0	0.016829
7888	5561.75	1	0	1	0	0	0	0.0168248
7890	5561.78	1	0	1	0	0	0	0.0168422
7892	5561.81	1	0	1	0	0	0	0.0168942
7894	5561.85	1	0	1	0	0	0	0.0169116
7896	5561.88	1	0	1	0	0	0	0.0169727
7898	5561.91	1	0	1	0	0	0	0.0170633
7900	5561.95	1	0	1	0	0	0	0.0170351
7902	5561.98	1	0	1	0	0	0	0.0170173
7904	5562.01	1	0	1	0	0	0	0.0170187
7906	5562.05	1	0	1	0	0	0	0.0170086
7908	5562.08	1	0	1	0	0	0	0.0171195
7910	5562.11	1	0	1	0	0	0	0.0169911
7912	5562.15	1	0	1	0	0	0	0.0170103
7914	5562.18	1	0	1	0	0	0	0.0168572
7916	5562.21	1	0	1	0	0	0	0.0168028
7918	5562.25	1	0	1	0	0	0	0.0168321
7920	5562.28	1	0	1	0	0	0	0.0168279
7922	5562.31	1	0	1	0	0	0	0.0168572
7924	5562.35	1	0	1	0	0	0	0.0168496
7926	5562.38	1	0	1	0	0	0	0.0169064
7928	5562.41	1	0	1	0	0	0	0.0169291
7930	5562.45	1	0	1	0	0	0	0.0168468
7932	5562.48	1	0	1	0	0	0	0.0168827
7934	5562.51	1	0	1	0	0	0	0.0168722
7936	5562.55	1	0	1	0	0	0	0.0168496
7938	5562.58	1	0	1	0	0	0	0.0168408
7940	5562.61	1	0	1	0	0	0	0.0168206
7942	5562.65	1	0	1	0	0	0	0.0168848
7944	5562.68	1	0	1	0	0	0	0.0170002
7946	5562.71	1	0	1	0	0	0	0.0171184
7948	5562.75	1	0	1	0	0	0	0.017123
7950	5562.78	1	0	1	0	0	0	0.0170557
7952	5562.81	1	0	1	0	0	0	0.0169336
7954	5562.85	1	0	1	0	0	0	0.0169298
7956	5562.88	1	0	1	0	0	0	0.0168548
7958	5562.91	1	0	1	0	0	0	0.0168377
7960	5562.95	1	0	1	0	0	0	0.0167941
7962	5562.98	1	0	1	0	0	0	0.0168311
7964	5563.01	1	0	1	0	0	0	0.0167777
7966	5563.05	1	0	1	0	0	0	0.0168562
7968	5563.08	1	0	1	0	0	0	0.0167436
7970	5563.11	1	0	1	0	0	0	0.0167746
7972	5563.15	1	0	1	0	0	0	0.0169709
7974	5563.18	1	0	1	0	0	0	0.0169472
7976	5563.21	1	0	1	0	0	0	0.0170135
7978	5563.25	1	0	1	0	0	0	0.0169333
7980	5563.28	1	0	1	0	0	0	0.016966
7982	5563.31	1	0	1	0	0	0	0.0169245
7984	5563.35	1	0	1	0	0	0	0.0168265
7986	5563.38	1	0	1	0	0	0	0.0169221
7988	5563.41	1	0	1	0	0	0	0.0167816
7990	5563.45	1	0	1	0	0	0	0.0167446
7992	5563.48	1	0	1	0	0	0	0.0168803
7994	5563.51	1	0	1	0	0	0	0.0168694
7996	5563.55	1	0	1	0	0	0	0.0169061
7998	5563.58	1	0	1	0	0	0	0.0168837
8000	5563.61	1	0	1	0	0	0	0.0169929
8002	5563.65	1	0	1	0	0	0	0.0170037
8004	5563.68	1	0	1	0	0	0	0.0168255
8006	5563.71	1	0	1	0	0	0	0.0169939
8008	5563.75	1	0	1	0	0	0	0.0169214
8010	5563.78	1	0	1	0	0	0	0.0169106
8012	5563.81	1	0	1	0	0	0	0.0169901
8014	5563.85	1	0	1	0	0	0	0.0169863
8016	5563.88	1	0	1	0	0	0	0.0168879
8018	5563.91	1	0	1	0	0	0	0.0168304
8020	5563.95	1	0	1	0	0	0	0.0169088
8022	5563.98	1	0	1	0	0	0	0.0168342
8024	5564.01	1	0	1	0	0	0	0.016912
8026	5564.05	1	0	1	0	0	0	0.0170131
8028	5564.08	1	0	1	0	0	0	0.0168534
8030	5564.11	1	0	1	0	0	0	0.0169242
8032	5564.15	1	0	1	0	0	0	0.0170187
8034	5564.18	1	0	1	0	0	0	0.0170114
8036	5564.21	1	0	1	0	0	0	0.0169179
8038	5564.25	1	0	1	0	0	0	0.0169148
8040	5564.28	1	0	1	0	0	0	0.0169406
8042	5564.31	1	0	1	0	0	0	0.0168712
8044	5564.35	1	0	1	0	0	0	0.0168395
8046	5564.38	1	0	1	0	0	0	0.0169814
8048	5564.41	1	0	1	0	0	0	0.0168586
8050	5564.45	1	0	1	0	0	0	0.0168227
8052	5564.48	1	0	1	0	0	0	0.0168851
8054	5564.51	1	0	1	0	0	0	0.0168621
8056	5564.55	1	0	1	0	0	0	0.0169092
8058	5564.58	1	0	1	0	0	0	0.0169734
8060	5564.61	1	0	1	0	0	0	0.0168928
8062	5564.65	1	0	1	0	0	0	0.0168527
8064	5564.68	1	0	1	0	0	0	0.01692
8066	5564.71	1	0	1	0	0	0	0.0169109
8068	5564.75	1	0	1	0	0	0	0.0168419
8070	5564.78	1	0	1	0	0	0	0.0168593
8072	5564.81	1	0	1	0	0	0	0.0168796
8074	5564.85	1	0	1	0	0	0	0.0168443
8076	5564.88	1	0	1	0	0	0	0.0168412
8078	5564.91	1	0	1	0	0	0	0.0168269
8080	5564.95	1	0	1	0	0	0	0.0168129
8082	5564.98	1	0	1	0	0	0	0.0167861
8084	5565.01	1	0	1	0	0	0	0.0167802
8086	5565.05	1	0	1	0	0	0	0.0168
8088	5565.08	1	0	1	0	0	0	0.0168248
8090	5565.11	1	0	1	0	0	0	0.0168178
8092	5565.15	1	0	1	0	0	0	0.0168007
8094	5565.18	1	0	1	0	0	0	0.0168778
8096	5565.21	1	0	1	0	0	0	0.0169197
8098	5565.25	1	0	1	0	0	0	0.0169702
8100	5565.28	1	0	1	0	0	0	0.0170975
8102	5565.31	1	0	1	0	0	0	0.0170246
8104	5565.35	1	0	1	0	0	0	0.0170023
8106	5565.38	1	0	1	0	0	0	0.0170351
8108	5565.41	1	0	1	0	0	0	0.0170724
8110	5565.45	1	0	1	0	0	0	0.0170452
8112	5565.48	1	0	1	0	0	0	0.0169936
8114	5565.51	1	0	1	0	0	0	0.0169863
8116	5565.55	1	0	1	0	0	0	0.0169169
8118	5565.58	1	0	1	0	0	0	0.0169612
8120	5565.61	1	0	1	0	0	0	0.0170058
8122	5565.65	1	0	1	0	0	0	0.0169716
8124	5565.68	1	0	1	0	0	0	0.0169636
8126	5565.71	1	0	1	0	0	0	0.0169326
8128	5565.75	1	0	1	0	0	0	0.0169643
8130	5565.78	1	0	1	0	0	0	0.0169458
8132	5565.81	1	0	1	0	0	0	0.0169674
8134	5565.85	1	0	1	0	0	0	0.0170183
8136	5565.88	1	0	1	0	0	0	0.0169908
8138	5565.91	1	0	1	0	0	0	0.0169828
8140	5565.95	1	0	1	0	0	0	0.0169305
8142	5565.98	1	0	1	0	0	0	0.0169235
8144	5566.01	1	0	1	0	0	0	0.0169346
8146	5566.05	1	0	1	0	0	0	0.0168544
8148	5566.08	1	0	1	0	0	0	0.0169664
8150	5566.11	1	0	1	0	0	0	0.016806
8152	5566.15	1	0	1	0	0	0	0.0167858
8154	5566.18	1	0	1	0	0	0	0.0168618
8156	5566.21	1	0	1	0	0	0	0.0167676
8158	5566.25	1	0	1	0	0	0	0.0167906
8160	5566.28	1	0	1	0	0	0	0.0168537
8162	5566.31	1	0	1	0	0	0	0.0168199
8164	5566.35	1	0	1	0	0	0	0.0167906
8166	5566.38	1	0	1	0	0	0	0.0167809
8168	5566.41	1	0	1	0	0	0	0.0167505
8170	5566.45	1	0	1	0	0	0	0.0167024
8172	5566.48	1	0	1	0	0	0	0.0166647
8174	5566.51	1	0	1	0	0	0	0.0166306
8176	5566.55	1	0	1	0	0	0	0.0165908
8178	5566.58	1	0	1	0	0	0	0.0165912
8180	5566.61	1	0	1	0	0	0	0.0165664
8182	5566.65	1	0	1	0	0	0	0.0165873
8184	5566.68	1	0	1	0	0	0	0.0166407
8186	5566.71	1	0	1	0	0	0	0.0166651
8188	5566.75	1	0	1	0	0	0	0.0167314
8190	5566.78	1	0	1	0	0	0	0.0167369
8192	5566.81	1	0	1	0	0	0	0.0168565
8194	5566.85	1	0	1	0	0	0	0.017003
8196	5566.88	1	0	1	0	0	0	0.0171243
8198	5566.91	1	0	1	0	0	0	0.0171397
8200	5566.95	1	0	1	0	0	0	0.0170563
8202	5566.98	1	0	1	0	0	0	0.0170822
8204	5567.01	1	0	1	0	0	0	0.0170954
8206	5567.05	1	0	1	0	0	0	0.0170738
8208	5567.08	1	0	1	0	0	0	0.017041
8210	5567.11	1	0	1	0	0	0	0.017056
8212	5567.15	1	0	1	0	0	0	0.0170525
8214	5567.18	1	0	1	0	0	0	0.0170762
8216	5567.21	1	0	1	0	0	0	0.0170626
8218	5567.25	1	0	1	0	0	0	0.01704
8220	5567.28	1	0	1	0	0	0	0.0170169
8222	5567.31	1	0	1	0	0	0	0.0170427
8224	5567.35	1	0	1	0	0	0	0.0170019
8226	5567.38	1	0	1	0	0	0	0.0169838
8228	5567.41	1	0	1	0	0	0	0.0170051
8230	5567.45	1	0	1	0	0	0	0.0170019
8232	5567.48	1	0	1	0	0	0	0.0170706
8234	5567.51	1	0	1	0	0	0	0.0170379
8236	5567.55	1	0	1	0	0	0	0.0170274
8238	5567.58	1	0	1	0	0	0	0.0170752
8240	5567.61	1	0	1	0	0	0	0.0169765
8242	5567.65	1	0	1	0	0	0	0.0170525
8244	5567.68	1	0	1	0	0	0	0.0170466
8246	5567.71	1	0	1	0	0	0	0.0170434
8248	5567.75	1	0	1	0	0	0	0.0171132
8250	5567.78	1	0	1	0	0	0	0.0171209
8252	5567.81	1	0	1	0	0	0	0.0171299
8254	5567.85	1	0	1	0	0	0	0.0170961
8256	5567.88	1	0	1	0	0	0	0.0170881
8258	5567.91	1	0	1	0	0	0	0.0171644
8260	5567.95	1	0	1	0	0	0	0.0171334
8262	5567.98	1	0	1	0	0	0	0.0172091
8264	5568.01	1	0	1	0	0	0	0.0171561
8266	5568.05	1	0	1	0	0	0	0.0171833
8268	5568.08	1	0	1	0	0	0	0.01717
8270	5568.11	1	0	1	0	0	0	0.0171927
8272	5568.15	1	0	1	0	0	0	0.0172534
8274	5568.18	1	0	1	0	0	0	0.0172168
8276	5568.21	1	0	1	0	0	0	0.0172523
8278	5568.25	1	0	1	0	0	0	0.0171794
8280	5568.28	1	0	1	0	0	0	0.0170916
8282	5568.31	1	0	1	0	0	0	0.0170557
8284	5568.35	1	0	1	0	0	0	0.0170396
8286	5568.38	1	0	1	0	0	0	0.0170727
8288	5568.41	1	0	1	0	0	0	0.0170246
8290	5568.45	1	0	1	0	0	0	0.0169754
8292	5568.48	1	0	1	0	0	0	0.0169842
8294	5568.51	1	0	1	0	0	0	0.0170114
8296	5568.55	1	0	1	0	0	0	0.0169953
8298	5568.58	1	0	1	0	0	0	0.0169493
8300	5568.61	1	0	1	0	0	0	0.0169685
8302	5568.65	1	0	1	0	0	0	0.0170316
8304	5568.68	1	0	1	0	0	0	0.0169674
8306	5568.71	1	0	1	0	0	0	0.0170225
8308	5568.75	1	0	1	0	0	0	0.0169741
8310	5568.78	1	0	1	0	0	0	0.0169838
8312	5568.81	1	0	1	0	0	0	0.0170358
8314	5568.85	1	0	1	0	0	0	0.0169828
8316	5568.88	1	0	1	0	0	0	0.0169312
8318	5568.91	1	0	1	0	0	0	0.016942
8320	5568.95	1	0	1	0	0	0	0.0169538
8322	5568.98	1	0	1	0	0	0	0.016866
8324	5569.01	1	0	1	0	0	0	0.0168328
8326	5569.05	1	0	1	0	0	0	0.0169678
8328	5569.08	1	0	1	0	0	0	0.0169629
8330	5569.11	1	0	1	0	0	0	0.0169528
8332	5569.15	1	0	1	0	0	0	0.0170037
8334	5569.18	1	0	1	0	0	0	0.0170075
8336	5569.21	1	0	1	0	0	0	0.01698
8338	5569.25	1	0	1	0	0	0	0.0169217
8340	5569.28	1	0	1	0	0	0	0.0169238
8342	5569.31	1	0	1	0	0	0	0.0169413
8344	5569.35	1	0	1	0	0	0	0.0169622
8346	5569.38	1	0	1	0	0	0	0.0169793
8348	5569.41	1	0	1	0	0	0	0.0169674
8350	5569.45	1	0	1	0	0	0	0.0169388
8352	5569.48	1	0	1	0	0	0	0.0169549
8354	5569.51	1	0	1	0	0	0	0.0168872
8356	5569.55	1	0	1	0	0	0	0.0168506
8358	5569.58	1	0	1	0	0	0	0.0167781
8360	5569.61	1	0	1	0	0	0	0.0167676
8362	5569.65	1	0	1	0	0	0	0.0168227
8364	5569.68	1	0	1	0	0	0	0.0168464
8366	5569.71	1	0	1	0	0	0	0.0168447
8368	5569.75	1	0	1	0	0	0	0.0168489
8370	5569.78	1	0	1	0	0	0	0.0168855
8372	5569.81	1	0	1	0	0	0	0.0167969
8374	5569.85	1	0	1	0	0	0	0.016919
8376	5569.88	1	0	1	0	0	0	0.0170019
8378	5569.91	1	0	1	0	0	0	0.0169235
8380	5569.95	1	0	1	0	0	0	0.016981
8382	5569.98	1	0	1	0	0	0	0.0170187
8384	5570.01	1	0	1	0	0	0	0.0171449
8386	5570.05	1	0	1	0	0	0	0.0171669
8388	5570.08	1	0	1	0	0	0	0.0170703
8390	5570.11	1	0	1	0	0	0	0.0170414
8392	5570.15	1	0	1	0	0	0	0.0169824
8394	5570.18	1	0	1	0	0	0	0.0169353
8396	5570.21	1	0	1	0	0	0	0.016919
8398	5570.25	1	0	1	0	0	0	0.01695
8400	5570.28	1	0	1	0	0	0	0.0168925
8402	5570.31	1	0	1	0	0	0	0.016836
8404	5570.35	1	0	1	0	0	0	0.0169479
8406	5570.38	1	0	1	0	0	0	0.01704
8408	5570.41	1	0	1	0	0	0	0.0169688
8410	5570.45	1	0	1	0	0	0	0.0169932
8412	5570.48	1	0	1	0	0	0	0.0169653
8414	5570.51	1	0	1	0	0	0	0.0168761
8416	5570.55	1	0	1	0	0	0	0.0168192
8418	5570.58	1	0	1	0	0	0	0.0168586
8420	5570.61	1	0	1	0	0	0	0.0169214
8422	5570.65	1	0	1	0	0	0	0.0168952
8424	5570.68	1	0	1	0	0	0	0.0169552
8426	5570.71	1	0	1	0	0	0	0.016905
8428	5570.75	1	0	1	0	0	0	0.016958
8430	5570.78	1	0	1	0	0	0	0.0168607
8432	5570.81	1	0	1	0	0	0	0.0167885
8434	5570.85	1	0	1	0	0	0	0.0169374
8436	5570.88	1	0	1	0	0	0	0.0169078
8438	5570.91	1	0	1	0	0	0	0.0169095
8440	5570.95	1	0	1	0	0	0	0.0169503
8442	5570.98	1	0	1	0	0	0	0.0169399
8444	5571.01	1	0	1	0	0	0	0.0169608
8446	5571.05	1	0	1	0	0	0	0.016904
8448	5571.08	1	0	1	0	0	0	0.0169183
8450	5571.11	1	0	1	0	0	0	0.0168646
8452	5571.15	1	0	1	0	0	0	0.0168182
8454	5571.18	1	0	1	0	0	0	0.0168276
8456	5571.21	1	0	1	0	0	0	0.0168757
8458	5571.25	1	0	1	0	0	0	0.0169074
8460	5571.28	1	0	1	0	0	0	0.0169273
8462	5571.31	1	0	1	0	0	0	0.0170138
8464	5571.35	1	0	1	0	0	0	0.0171017
8466	5571.38	1	0	1	0	0	0	0.0171059
8468	5571.41	1	0	1	0	0	0	0.0171142
8470	5571.45	1	0	1	0	0	0	0.0170389
8472	5571.48	1	0	1	0	0	0	0.0170462
8474	5571.51	1	0	1	0	0	0	0.0169643
8476	5571.55	1	0	1	0	0	0	0.0168604
8478	5571.58	1	0	1	0	0	0	0.016936
8480	5571.61	1	0	1	0	0	0	0.0169814
8482	5571.65	1	0	1	0	0	0	0.0170013
8484	5571.68	1	0	1	0	0	0	0.016868
8486	5571.71	1	0	1	0	0	0	0.0169538
8488	5571.75	1	0	1	0	0	0	0.0169127
8490	5571.78	1	0	1	0	0	0	0.0168374
8492	5571.81	1	0	1	0	0	0	0.0169106
8494	5571.85	1	0	1	0	0	0	0.0170002
8496	5571.88	1	0	1	0	0	0	0.0170075
8498	5571.91	1	0	1	0	0	0	0.0170309
8500	5571.95	1	0	1	0	0	0	0.0169772
8502	5571.98	1	0	1	0	0	0	0.0170023
8504	5572.01	1	0	1	0	0	0	0.0169748
8506	5572.05	1	0	1	0	0	0	0.0168959
8508	5572.08	1	0	1	0	0	0	0.0168708
8510	5572.11	1	0	1	0	0	0	0.0168796
8512	5572.15	1	0	1	0	0	0	0.0169925
8514	5572.18	1	0	1	0	0	0	0.0169748
8516	5572.21	1	0	1	0	0	0	0.0170229
8518	5572.25	1	0	1	0	0	0	0.0170459
8520	5572.28	1	0	1	0	0	0	0.0170347
8522	5572.31	1	0	1	0	0	0	0.0170971
8524	5572.35	1	0	1	0	0	0	0.0170326
8526	5572.38	1	0	1	0	0	0	0.0169629
8528	5572.41	1	0	1	0	0	0	0.0170434
8530	5572.45	1	0	1	0	0	0	0.0169932
8532	5572.48	1	0	1	0	0	0	0.0169476
8534	5572.51	1	0	1	0	0	0	0.0168977
8536	5572.55	1	0	1	0	0	0	0.0170305
8538	5572.58	1	0	1	0	0	0	0.0169744
8540	5572.61	1	0	1	0	0	0	0.0168973
8542	5572.65	1	0	1	0	0	0	0.0169866
8544	5572.68	1	0	1	0	0	0	0.017033
8546	5572.71	1	0	1	0	0	0	0.0170124
8548	5572.75	1	0	1	0	0	0	0.0170114
8550	5572.78	1	0	1	0	0	0	0.0170361
8552	5572.81	1	0	1	0	0	0	0.0170295
8554	5572.85	1	0	1	0	0	0	0.0169001
8556	5572.88	1	0	1	0	0	0	0.0169856
8558	5572.91	1	0	1	0	0	0	0.0170543
8560	5572.95	1	0	1	0	0	0	0.0170421
8562	5572.98	1	0	1	0	0	0	0.0170271
8564	5573.01	1	0	1	0	0	0	0.0169528
8566	5573.05	1	0	1	0	0	0	0.0170455
8568	5573.08	1	0	1	0	0	0	0.0170414
8570	5573.11	1	0	1	0	0	0	0.0170588
8572	5573.15	1	0	1	0	0	0	0.0170644
8574	5573.18	1	0	1	0	0	0	0.0169929
8576	5573.21	1	0	1	0	0	0	0.0170539
8578	5573.25	1	0	1	0	0	0	0.016996
8580	5573.28	1	0	1	0	0	0	0.0170058
8582	5573.31	1	0	1	0	0	0	0.0169981
8584	5573.35	1	0	1	0	0	0	0.017026
8586	5573.38	1	0	1	0	0	0	0.0170699
8588	5573.41	1	0	1	0	0	0	0.0170169
8590	5573.45	1	0	1	0	0	0	0.0170563
8592	5573.48	1	0	1	0	0	0	0.0169817
8594	5573.51	1	0	1	0	0	0	0.0170155
8596	5573.55	1	0	1	0	0	0	0.0169716
8598	5573.58	1	0	1	0	0	0	0.0169005
8600	5573.61	1	0	1	0	0	0	0.0169238
8602	5573.65	1	0	1	0	0	0	0.0169573
8604	5573.68	1	0	1	0	0	0	0.0169057
8606	5573.71	1	0	1	0	0	0	0.016966
8608	5573.75	1	0	1	0	0	0	0.0169831
8610	5573.78	1	0	1	0	0	0	0.0169925
8612	5573.81	1	0	1	0	0	0	0.0169936
8614	5573.85	1	0	1	0	0	0	0.0170026
8616	5573.88	1	0	1	0	0	0	0.0169552
8618	5573.91	1	0	1	0	0	0	0.0168464
8620	5573.95	1	0	1	0	0	0	0.0168925
8622	5573.98	1	0	1	0	0	0	0.0169245
8624	5574.01	1	0	1	0	0	0	0.0169095
8626	5574.05	1	0	1	0	0	0	0.0168698
8628	5574.08	1	0	1	0	0	0	0.0168719
8630	5574.11	1	0	1	0	0	0	0.0168677
8632	5574.15	1	0	1	0	0	0	0.0167927
8634	5574.18	1	0	1	0	0	0	0.0169064
8636	5574.21	1	0	1	0	0	0	0.0168572
8638	5574.25	1	0	1	0	0	0	0.0168269
8640	5574.28	1	0	1	0	0	0	0.0168639
8642	5574.31	1	0	1	0	0	0	0.0168537
8644	5574.35	1	0	1	0	0	0	0.016852
8646	5574.38	1	0	1	0	0	0	0.0168084
8648	5574.41	1	0	1	0	0	0	0.0167847
8650	5574.45	1	0	1	0	0	0	0.0166913
8652	5574.48	1	0	1	0	0	0	0.0166613
8654	5574.51	1	0	1	0	0	0	0.0166839
8656	5574.55	1	0	1	0	0	0	0.0166846
8658	5574.58	1	0	1	0	0	0	0.0167066
8660	5574.61	1	0	1	0	0	0	0.0167327
8662	5574.65	1	0	1	0	0	0	0.0167083
8664	5574.68	1	0	1	0	0	0	0.0166745
8666	5574.71	1	0	1	0	0	0	0.0167547
8668	5574.75	1	0	1	0	0	0	0.0168339
8670	5574.78	1	0	1	0	0	0	0.0168457
8672	5574.81	1	0	1	0	0	0	0.0169263
8674	5574.85	1	0	1	0	0	0	0.0169573
8676	5574.88	1	0	1	0	0	0	0.017004
8678	5574.91	1	0	1	0	0	0	0.0169221
8680	5574.95	1	0	1	0	0	0	0.0168945
8682	5574.98	1	0	1	0	0	0	0.0169019
8684	5575.01	1	0	1	0	0	0	0.0169636
8686	5575.05	1	0	1	0	0	0	0.0168809
8688	5575.08	1	0	1	0	0	0	0.0168492
8690	5575.11	1	0	1	0	0	0	0.0169709
8692	5575.15	1	0	1	0	0	0	0.0169064
8694	5575.18	1	0	1	0	0	0	0.0168349
8696	5575.21	1	0	1	0	0	0	0.0167429
8698	5575.25	1	0	1	0	0	0	0.01667
8700	5575.28	1	0	1	0	0	0	0.0166351
8702	5575.31	1	0	1	0	0	0	0.0166459
8704	5575.35	1	0	1	0	0	0	0.0166679
8706	5575.38	1	0	1	0	0	0	0.0167338
8708	5575.41	1	0	1	0	0	0	0.0167118
8710	5575.45	1	0	1	0	0	0	0.0166871
8712	5575.48	1	0	1	0	0	0	0.01673
8714	5575.51	1	0	1	0	0	0	0.016708
8716	5575.55	1	0	1	0	0	0	0.0167627
8718	5575.58	1	0	1	0	0	0	0.0168722
8720	5575.61	1	0	1	0	0	0	0.0169214
8722	5575.65	1	0	1	0	0	0	0.0170135
8724	5575.68	1	0	1	0	0	0	0.0170086
8726	5575.71	1	0	1	0	0	0	0.017025
8728	5575.75	1	0	1	0	0	0	0.0169793
8730	5575.78	1	0	1	0	0	0	0.0168803
8732	5575.81	1	0	1	0	0	0	0.0170058
8734	5575.85	1	0	1	0	0	0	0.016821
8736	5575.88	1	0	1	0	0	0	0.0166906
8738	5575.91	1	0	1	0	0	0	0.0167397
8740	5575.95	1	0	1	0	0	0	0.0167188
8742	5575.98	1	0	1	0	0	0	0.0167352
8744	5576.01	1	0	1	0	0	0	0.0167582
8746	5576.05	1	0	1	0	0	0	0.0168196
8748	5576.08	1	0	1	0	0	0	0.0167108
8750	5576.11	1	0	1	0	0	0	0.0167017
8752	5576.15	1	0	1	0	0	0	0.0166044
8754	5576.18	1	0	1	0	0	0	0.0165866
8756	5576.21	1	0	1	0	0	0	0.0166062
8758	5576.25	1	0	1	0	0	0	0.0166484
8760	5576.28	1	0	1	0	0	0	0.0166051
8762	5576.31	1	0	1	0	0	0	0.0167184
8764	5576.35	1	0	1	0	0	0	0.016655
8766	5576.38	1	0	1	0	0	0	0.0167021
8768	5576.41	1	0	1	0	0	0	0.016701
8770	5576.45	1	0	1	0	0	0	0.0166487
8772	5576.48	1	0	1	0	0	0	0.0166578
8774	5576.51	1	0	1	0	0	0	0.0167083
8776	5576.55	1	0	1	0	0	0	0.0168203
8778	5576.58	1	0	1	0	0	0	0.0167439
8780	5576.61	1	0	1	0	0	0	0.0167205
8782	5576.65	1	0	1	0	0	0	0.0167436
8784	5576.68	1	0	1	0	0	0	0.016662
8786	5576.71	1	0	1	0	0	0	0.0166933
8788	5576.75	1	0	1	0	0	0	0.0166316
8790	5576.78	1	0	1	0	0	0	0.0165898
8792	5576.81	1	0	1	0	0	0	0.0166072
8794	5576.85	1	0	1	0	0	0	0.0166926
8796	5576.88	1	0	1	0	0	0	0.0166365
8798	5576.91	1	0	1	0	0	0	0.0165664
8800	5576.95	1	0	1	0	0	0	0.016542
8802	5576.98	1	0	1	0	0	0	0.0165176
8804	5577.01	1	0	1	0	0	0	0.0165106
8806	5577.05	1	0	1	0	0	0	0.0165253
8808	5577.08	1	0	1	0	0	0	0.0164747
8810	5577.11	1	0	1	0	0	0	0.0164775
8812	5577.15	1	0	1	0	0	0	0.016458
8814	5577.18	1	0	1	0	0	0	0.0164297
8816	5577.21	1	0	1	0	0	0	0.0164283
8818	5577.25	1	0	1	0	0	0	0.0164123
8820	5577.28	1	0	1	0	0	0	0.0163732
8822	5577.31	1	0	1	0	0	0	0.0164043
8824	5577.35	1	0	1	0	0	0	0.0164245
8826	5577.38	1	0	1	0	0	0	0.016556
8828	5577.41	1	0	1	0	0	0	0.0166752
8830	5577.45	1	0	1	0	0	0	0.0166665
8832	5577.48	1	0	1	0	0	0	0.0165723
8834	5577.51	1	0	1	0	0	0	0.016556
8836	5577.55	1	0	1	0	0	0	0.0165375
8838	5577.58	1	0	1	0	0	0	0.016505
8840	5577.61	1	0	1	0	0	0	0.016435
8842	5577.65	1	0	1	0	0	0	0.0163994
8844	5577.68	1	0	1	0	0	0	0.0164189
8846	5577.71	1	0	1	0	0	0	0.0164029
8848	5577.75	1	0	1	0	0	0	0.0164116
8850	5577.78	1	0	1	0	0	0	0.0164011
8852	5577.81	1	0	1	0	0	0	0.0164778
8854	5577.85	1	0	1	0	0	0	0.016421
8856	5577.88	1	0	1	0	0	0	0.016422
8858	5577.91	1	0	1	0	0	0	0.0164792
8860	5577.95	1	0	1	0	0	0	0.016467
8862	5577.98	1	0	1	0	0	0	0.0164733
8864	5578.01	1	0	1	0	0	0	0.0164179
8866	5578.05	1	0	1	0	0	0	0.0164252
8868	5578.08	1	0	1	0	0	0	0.0163987
8870	5578.11	1	0	1	0	0	0	0.0164353
8872	5578.15	1	0	1	0	0	0	0.0163732
8874	5578.18	1	0	1	0	0	0	0.0163868
8876	5578.21	1	0	1	0	0	0	0.0163847
8878	5578.25	1	0	1	0	0	0	0.0163837
8880	5578.28	1	0	1	0	0	0	0.0164182
8882	5578.31	1	0	1	0	0	0	0.0164137
8884	5578.35	1	0	1	0	0	0	0.0164852
8886	5578.38	1	0	1	0	0	0	0.0164751
8888	5578.41	1	0	1	0	0	0	0.0165957
8890	5578.45	1	0	1	0	0	0	0.0166853
8892	5578.48	1	0	1	0	0	0	0.0166975
8894	5578.51	1	0	1	0	0	0	0.0168475
8896	5578.55	1	0	1	0	0	0	0.0167882
8898	5578.58	1	0	1	0	0	0	0.0168694
8900	5578.61	1	0	1	0	0	0	0.0168506
8902	5578.65	1	0	1	0	0	0	0.0168914
8904	5578.68	1	0	1	0	0	0	0.0169197
8906	5578.71	1	0	1	0	0	0	0.0168126
8908	5578.75	1	0	1	0	0	0	0.0167662
8910	5578.78	1	0	1	0	0	0	0.0167505
8912	5578.81	1	0	1	0	0	0	0.0166954
8914	5578.85	1	0	1	0	0	0	0.0167973
8916	5578.88	1	0	1	0	0	0	0.0167962
8918	5578.91	1	0	1	0	0	0	0.0168398
8920	5578.95	1	0	1	0	0	0	0.0168869
8922	5578.98	1	0	1	0	0	0	0.0168485
8924	5579.01	1	0	1	0	0	0	0.0169333
8926	5579.05	1	0	1	0	0	0	0.0168712
8928	5579.08	1	0	1	0	0	0	0.0168265
8930	5579.11	1	0	1	0	0	0	0.0168384
8932	5579.15	1	0	1	0	0	0	0.0168994
8934	5579.18	1	0	1	0	0	0	0.0169716
8936	5579.21	1	0	1	0	0	0	0.0169263
8938	5579.25	1	0	1	0	0	0	0.0168524
8940	5579.28	1	0	1	0	0	0	0.0168771
8942	5579.31	1	0	1	0	0	0	0.0168175
8944	5579.35	1	0	1	0	0	0	0.0168984
8946	5579.38	1	0	1	0	0	0	0.0169727
8948	5579.41	1	0	1	0	0	0	0.0169531
8950	5579.45	1	0	1	0	0	0	0.0169528
8952	5579.48	1	0	1	0	0	0	0.0168785
8954	5579.51	1	0	1	0	0	0	0.0169702
8956	5579.55	1	0	1	0	0	0	0.0169064
8958	5579.58	1	0	1	0	0	0	0.0169744
8960	5579.61	1	0	1	0	0	0	0.0168429
8962	5579.65	1	0	1	0	0	0	0.0168408
8964	5579.68	1	0	1	0	0	0	0.0168562
8966	5579.71	1	0	1	0	0	0	0.0168356
8968	5579.75	1	0	1	0	0	0	0.0168492
8970	5579.78	1	0	1	0	0	0	0.0168813
8972	5579.81	1	0	1	0	0	0	0.0168572
8974	5579.85	1	0	1	0	0	0	0.0168007
8976	5579.88	1	0	1	0	0	0	0.0168105
8978	5579.91	1	0	1	0	0	0	0.0168332
8980	5579.95	1	0	1	0	0	0	0.0168032
8982	5579.98	1	0	1	0	0	0	0.0167868
8984	5580.01	1	0	1	0	0	0	0.0168663
8986	5580.05	1	0	1	0	0	0	0.0167655
8988	5580.08	1	0	1	0	0	0	0.0167788
8990	5580.11	1	0	1	0	0	0	0.0168328
8992	5580.15	1	0	1	0	0	0	0.0168729
8994	5580.18	1	0	1	0	0	0	0.0167959
8996	5580.21	1	0	1	0	0	0	0.0167896
8998	5580.25	1	0	1	0	0	0	0.0168537
9000	5580.28	1	0	1	0	0	0	0.016866
9002	5580.31	1	0	1	0	0	0	0.0168527
9004	5580.35	1	0	1	0	0	0	0.0168531
9006	5580.38	1	0	1	0	0	0	0.0168035
9008	5580.41	1	0	1	0	0	0	0.0168363
9010	5580.45	1	0	1	0	0	0	0.0168401
9012	5580.48	1	0	1	0	0	0	0.0169061
9014	5580.51	1	0	1	0	0	0	0.0168858
9016	5580.55	1	0	1	0	0	0	0.0168764
9018	5580.58	1	0	1	0	0	0	0.0169064
9020	5580.61	1	0	1	0	0	0	0.0168656
9022	5580.65	1	0	1	0	0	0	0.0169326
9024	5580.68	1	0	1	0	0	0	0.0169252
9026	5580.71	1	0	1	0	0	0	0.0168837
9028	5580.75	1	0	1	0	0	0	0.016897
9030	5580.78	1	0	1	0	0	0	0.0168182
9032	5580.81	1	0	1	0	0	0	0.0169259
9034	5580.85	1	0	1	0	0	0	0.0168705
9036	5580.88	1	0	1	0	0	0	0.0168991
9038	5580.91	1	0	1	0	0	0	0.0168701
9040	5580.95	1	0	1	0	0	0	0.016897
9042	5580.98	1	0	1	0	0	0	0.0168858
9044	5581.01	1	0	1	0	0	0	0.0168876
9046	5581.05	1	0	1	0	0	0	0.0169012
9048	5581.08	1	0	1	0	0	0	0.0169768
9050	5581.11	1	0	1	0	0	0	0.0169894
9052	5581.15	1	0	1	0	0	0	0.0169622
9054	5581.18	1	0	1	0	0	0	0.0169622
9056	5581.21	1	0	1	0	0	0	0.0169563
9058	5581.25	1	0	1	0	0	0	0.0169514
9060	5581.28	1	0	1	0	0	0	0.0169266
9062	5581.31	1	0	1	0	0	0	0.0168823
9064	5581.35	1	0	1	0	0	0	0.0167373
9066	5581.38	1	0	1	0	0	0	0.0168405
9068	5581.41	1	0	1	0	0	0	0.0167994
9070	5581.45	1	0	1	0	0	0	0.016754
9072	5581.48	1	0	1	0	0	0	0.0168189
9074	5581.51	1	0	1	0	0	0	0.0168311
9076	5581.55	1	0	1	0	0	0	0.0168715
9078	5581.58	1	0	1	0	0	0	0.0167715
9080	5581.61	1	0	1	0	0	0	0.0168851
9082	5581.65	1	0	1	0	0	0	0.0168733
9084	5581.68	1	0	1	0	0	0	0.0168353
9086	5581.71	1	0	1	0	0	0	0.0168192
9088	5581.75	1	0	1	0	0	0	0.0168454
9090	5581.78	1	0	1	0	0	0	0.0168356
9092	5581.81	1	0	1	0	0	0	0.0168032
9094	5581.85	1	0	1	0	0	0	0.0167631
9096	5581.88	1	0	1	0	0	0	0.0169106
9098	5581.91	1	0	1	0	0	0	0.0168925
9100	5581.95	1	0	1	0	0	0	0.016852
9102	5581.98	1	0	1	0	0	0	0.0168959
9104	5582.01	1	0	1	0	0	0	0.016806
9106	5582.05	1	0	1	0	0	0	0.0168677
9108	5582.08	1	0	1	0	0	0	0.016761
9110	5582.11	1	0	1	0	0	0	0.016732
9112	5582.15	1	0	1	0	0	0	0.0168457
9114	5582.18	1	0	1	0	0	0	0.0168415
9116	5582.21	1	0	1	0	0	0	0.0168712
9118	5582.25	1	0	1	0	0	0	0.0168621
9120	5582.28	1	0	1	0	0	0	0.0168614
9122	5582.31	1	0	1	0	0	0	0.0168764
9124	5582.35	1	0	1	0	0	0	0.0168482
9126	5582.38	1	0	1	0	0	0	0.0169127
9128	5582.41	1	0	1	0	0	0	0.016951
9130	5582.45	1	0	1	0	0	0	0.0170016
9132	5582.48	1	0	1	0	0	0	0.0170605
9134	5582.51	1	0	1	0	0	0	0.01695
9136	5582.55	1	0	1	0	0	0	0.0168834
9138	5582.58	1	0	1	0	0	0	0.0168722
9140	5582.61	1	0	1	0	0	0	0.016889
9142	5582.65	1	0	1	0	0	0	0.0169228
9144	5582.68	1	0	1	0	0	0	0.016875
9146	5582.71	1	0	1	0	0	0	0.016942
9148	5582.75	1	0	1	0	0	0	0.0168489
9150	5582.78	1	0	1	0	0	0	0.0168537
9152	5582.81	1	0	1	0	0	0	0.0168381
9154	5582.85	1	0	1	0	0	0	0.0168391
9156	5582.88	1	0	1	0	0	0	0.016866
9158	5582.91	1	0	1	0	0	0	0.0167728
9160	5582.95	1	0	1	0	0	0	0.016815
9162	5582.98	1	0	1	0	0	0	0.0168771
9164	5583.01	1	0	1	0	0	0	0.016822
9166	5583.05	1	0	1	0	0	0	0.0167955
9168	5583.08	1	0	1	0	0	0	0.0167655
9170	5583.11	1	0	1	0	0	0	0.0168293
9172	5583.15	1	0	1	0	0	0	0.0167586
9174	5583.18	1	0	1	0	0	0	0.0167875
9176	5583.21	1	0	1	0	0	0	0.0168388
9178	5583.25	1	0	1	0	0	0	0.0168415
9180	5583.28	1	0	1	0	0	0	0.0168328
9182	5583.31	1	0	1	0	0	0	0.0167645
9184	5583.35	1	0	1	0	0	0	0.0168942
9186	5583.38	1	0	1	0	0	0	0.0168318
9188	5583.41	1	0	1	0	0	0	0.0168673
9190	5583.45	1	0	1	0	0	0	0.0168109
9192	5583.48	1	0	1	0	0	0	0.0168133
9194	5583.51	1	0	1	0	0	0	0.0167551
9196	5583.55	1	0	1	0	0	0	0.0167554
9198	5583.58	1	0	1	0	0	0	0.0167436
9200	5583.61	1	0	1	0	0	0	0.0168503
9202	5583.65	1	0	1	0	0	0	0.0167795
9204	5583.68	1	0	1	0	0	0	0.0167708
9206	5583.71	1	0	1	0	0	0	0.0168276
9208	5583.75	1	0	1	0	0	0	0.0167631
9210	5583.78	1	0	1	0	0	0	0.0168063
9212	5583.81	1	0	1	0	0	0	0.0168143
9214	5583.85	1	0	1	0	0	0	0.0167882
9216	5583.88	1	0	1	0	0	0	0.016784
9218	5583.91	1	0	1	0	0	0	0.0168328
9220	5583.95	1	0	1	0	0	0	0.0168363
9222	5583.98	1	0	1	0	0	0	0.0168028
9224	5584.01	1	0	1	0	0	0	0.0167178
9226	5584.05	1	0	1	0	0	0	0.016806
9228	5584.08	1	0	1	0	0	0	0.0167659
9230	5584.11	1	0	1	0	0	0	0.0167551
9232	5584.15	1	0	1	0	0	0	0.0168035
9234	5584.18	1	0	1	0	0	0	0.0169301
9236	5584.21	1	0	1	0	0	0	0.0169399
9238	5584.25	1	0	1	0	0	0	0.0168994
9240	5584.28	1	0	1	0	0	0	0.0168865
9242	5584.31	1	0	1	0	0	0	0.0168883
9244	5584.35	1	0	1	0	0	0	0.0169524
9246	5584.38	1	0	1	0	0	0	0.0168911
9248	5584.41	1	0	1	0	0	0	0.0168471
9250	5584.45	1	0	1	0	0	0	0.0169088
9252	5584.48	1	0	1	0	0	0	0.01683
9254	5584.51	1	0	1	0	0	0	0.0169109
9256	5584.55	1	0	1	0	0	0	0.0168649
9258	5584.58	1	0	1	0	0	0	0.0168314
9260	5584.61	1	0	1	0	0	0	0.0167568
9262	5584.65	1	0	1	0	0	0	0.0166735
9264	5584.68	1	0	1	0	0	0	0.0166707
9266	5584.71	1	0	1	0	0	0	0.016679
9268	5584.75	1	0	1	0	0	0	0.016641
9270	5584.78	1	0	1	0	0	0	0.0166606
9272	5584.81	1	0	1	0	0	0	0.0167073
9274	5584.85	1	0	1	0	0	0	0.0166229
9276	5584.88	1	0	1	0	0	0	0.0167024
9278	5584.91	1	0	1	0	0	0	0.0166913
9280	5584.95	1	0	1	0	0	0	0.016611
9282	5584.98	1	0	1	0	0	0	0.0166811
9284	5585.01	1	0	1	0	0	0	0.0167157
9286	5585.05	1	0	1	0	0	0	0.016655
9288	5585.08	1	0	1	0	0	0	0.0168011
9290	5585.11	1	0	1	0	0	0	0.016845
9292	5585.15	1	0	1	0	0	0	0.016845
9294	5585.18	1	0	1	0	0	0	0.0168966
9296	5585.21	1	0	1	0	0	0	0.016844
9298	5585.25	1	0	1	0	0	0	0.0168116
9300	5585.28	1	0	1	0	0	0	0.0167851
9302	5585.31	1	0	1	0	0	0	0.016875
9304	5585.35	1	0	1	0	0	0	0.0168966
9306	5585.38	1	0	1	0	0	0	0.0168743
9308	5585.41	1	0	1	0	0	0	0.0168391
9310	5585.45	1	0	1	0	0	0	0.0167756
9312	5585.48	1	0	1	0	0	0	0.0167565
9314	5585.51	1	0	1	0	0	0	0.0167812
9316	5585.55	1	0	1	0	0	0	0.0168279
9318	5585.58	1	0	1	0	0	0	0.0167031
9320	5585.61	1	0	1	0	0	0	0.0166993
9322	5585.65	1	0	1	0	0	0	0.016769
9324	5585.68	1	0	1	0	0	0	0.0166888
9326	5585.71	1	0	1	0	0	0	0.016701
9328	5585.75	1	0	1	0	0	0	0.0167976
9330	5585.78	1	0	1	0	0	0	0.0167359
9332	5585.81	1	0	1	0	0	0	0.0166975
9334	5585.85	1	0	1	0	0	0	0.0168196
9336	5585.88	1	0	1	0	0	0	0.0167805
9338	5585.91	1	0	1	0	0	0	0.0167083
9340	5585.95	1	0	1	0	0	0	0.0167317
9342	5585.98	1	0	1	0	0	0	0.0166651
9344	5586.01	1	0	1	0	0	0	0.0167258
9346	5586.05	1	0	1	0	0	0	0.016867
9348	5586.08	1	0	1	0	0	0	0.0169026
9350	5586.11	1	0	1	0	0	0	0.0168011
9352	5586.15	1	0	1	0	0	0	0.0167931
9354	5586.18	1	0	1	0	0	0	0.0168471
9356	5586.21	1	0	1	0	0	0	0.0169162
9358	5586.25	1	0	1	0	0	0	0.0168259
9360	5586.28	1	0	1	0	0	0	0.0167997
9362	5586.31	1	0	1	0	0	0	0.0168454
9364	5586.35	1	0	1	0	0	0	0.0168095
9366	5586.38	1	0	1	0	0	0	0.0167289
9368	5586.41	1	0	1	0	0	0	0.0167749
9370	5586.45	1	0	1	0	0	0	0.0167212
9372	5586.48	1	0	1	0	0	0	0.0166435
9374	5586.51	1	0	1	0	0	0	0.0166773
9376	5586.55	1	0	1	0	0	0	0.016662
9378	5586.58	1	0	1	0	0	0	0.0165734
9380	5586.61	1	0	1	0	0	0	0.0166616
9382	5586.65	1	0	1	0	0	0	0.0166487
9384	5586.68	1	0	1	0	0	0	0.0166142
9386	5586.71	1	0	1	0	0	0	0.0166348
9388	5586.75	1	0	1	0	0	0	0.0166613
9390	5586.78	1	0	1	0	0	0	0.0167111
9392	5586.81	1	0	1	0	0	0	0.0167003
9394	5586.85	1	0	1	0	0	0	0.0167439
9396	5586.88	1	0	1	0	0	0	0.0167164
9398	5586.91	1	0	1	0	0	0	0.0168646
9400	5586.95	1	0	1	0	0	0	0.016829
9402	5586.98	1	0	1	0	0	0	0.0168116
9404	5587.01	1	0	1	0	0	0	0.0167666
9406	5587.05	1	0	1	0	0	0	0.0166829
9408	5587.08	1	0	1	0	0	0	0.0167631
9410	5587.11	1	0	1	0	0	0	0.0168454
9412	5587.15	1	0	1	0	0	0	0.0168367
9414	5587.18	1	0	1	0	0	0	0.0168384
9416	5587.21	1	0	1	0	0	0	0.0168994
9418	5587.25	1	0	1	0	0	0	0.0169357
9420	5587.28	1	0	1	0	0	0	0.0169186
9422	5587.31	1	0	1	0	0	0	0.0169078
9424	5587.35	1	0	1	0	0	0	0.0168597
9426	5587.38	1	0	1	0	0	0	0.016882
9428	5587.41	1	0	1	0	0	0	0.0168227
9430	5587.45	1	0	1	0	0	0	0.0168182
9432	5587.48	1	0	1	0	0	0	0.0167456
9434	5587.51	1	0	1	0	0	0	0.0167767
9436	5587.55	1	0	1	0	0	0	0.0167014
9438	5587.58	1	0	1	0	0	0	0.0166299
9440	5587.61	1	0	1	0	0	0	0.0166993
9442	5587.65	1	0	1	0	0	0	0.0166431
9444	5587.68	1	0	1	0	0	0	0.0166679
9446	5587.71	1	0	1	0	0	0	0.0166065
9448	5587.75	1	0	1	0	0	0	0.0165211
9450	5587.78	1	0	1	0	0	0	0.0165912
9452	5587.81	1	0	1	0	0	0	0.0165929
9454	5587.85	1	0	1	0	0	0	0.0166246
9456	5587.88	1	0	1	0	0	0	0.0166578
9458	5587.91	1	0	1	0	0	0	0.0165469
9460	5587.95	1	0	1	0	0	0	0.0165322
9462	5587.98	1	0	1	0	0	0	0.0166456
9464	5588.01	1	0	1	0	0	0	0.0166236
9466	5588.05	1	0	1	0	0	0	0.0166145
9468	5588.08	1	0	1	0	0	0	0.0167631
9470	5588.11	1	0	1	0	0	0	0.0167854
9472	5588.15	1	0	1	0	0	0	0.016655
9474	5588.18	1	0	1	0	0	0	0.0166777
9476	5588.21	1	0	1	0	0	0	0.0166654
9478	5588.25	1	0	1	0	0	0	0.0165856
9480	5588.28	1	0	1	0	0	0	0.0166337
9482	5588.31	1	0	1	0	0	0	0.0165779
9484	5588.35	1	0	1	0	0	0	0.0165964
9486	5588.38	1	0	1	0	0	0	0.0166316
9488	5588.41	1	0	1	0	0	0	0.0166208
9490	5588.45	1	0	1	0	0	0	0.016556
9492	5588.48	1	0	1	0	0	0	0.0165863
9494	5588.51	1	0	1	0	0	0	0.0166682
9496	5588.55	1	0	1	0	0	0	0.0165859
9498	5588.58	1	0	1	0	0	0	0.0165849
9500	5588.61	1	0	1	0	0	0	0.0166609
9502	5588.65	1	0	1	0	0	0	0.016558
9504	5588.68	1	0	1	0	0	0	0.0165919
9506	5588.71	1	0	1	0	0	0	0.016595
9508	5588.75	1	0	1	0	0	0	0.0166128
9510	5588.78	1	0	1	0	0	0	0.0165587
9512	5588.81	1	0	1	0	0	0	0.0166634
9514	5588.85	1	0	1	0	0	0	0.0167809
9516	5588.88	1	0	1	0	0	0	0.0167669
9518	5588.91	1	0	1	0	0	0	0.0166703
9520	5588.95	1	0	1	0	0	0	0.0167181
9522	5588.98	1	0	1	0	0	0	0.0167362
9524	5589.01	1	0	1	0	0	0	0.0166299
9526	5589.05	1	0	1	0	0	0	0.0165664
9528	5589.08	1	0	1	0	0	0	0.0166159
9530	5589.11	1	0	1	0	0	0	0.0164984
9532	5589.15	1	0	1	0	0	0	0.0165043
9534	5589.18	1	0	1	0	0	0	0.0165078
9536	5589.21	1	0	1	0	0	0	0.0165012
9538	5589.25	1	0	1	0	0	0	0.0165127
9540	5589.28	1	0	1	0	0	0	0.0165709
9542	5589.31	1	0	1	0	0	0	0.0165556
9544	5589.35	1	0	1	0	0	0	0.0165493
9546	5589.38	1	0	1	0	0	0	0.0166006
9548	5589.41	1	0	1	0	0	0	0.0165755
9550	5589.45	1	0	1	0	0	0	0.016489
9552	5589.48	1	0	1	0	0	0	0.0165615
9554	5589.51	1	0	1	0	0	0	0.0166159
9556	5589.55	1	0	1	0	0	0	0.0165884
9558	5589.58	1	0	1	0	0	0	0.0165472
9560	5589.61	1	0	1	0	0	0	0.0166431
9562	5589.65	1	0	1	0	0	0	0.0166947
9564	5589.68	1	0	1	0	0	0	0.0165535
9566	5589.71	1	0	1	0	0	0	0.0166002
9568	5589.75	1	0	1	0	0	0	0.0165406
9570	5589.78	1	0	1	0	0	0	0.0165378
9572	5589.81	1	0	1	0	0	0	0.0165608
9574	5589.85	1	0	1	0	0	0	0.0165455
9576	5589.88	1	0	1	0	0	0	0.0166152
9578	5589.91	1	0	1	0	0	0	0.0166037
9580	5589.95	1	0	1	0	0	0	0.0166292
9582	5589.98	1	0	1	0	0	0	0.0167125
9584	5590.01	1	0	1	0	0	0	0.0166055
9586	5590.05	1	0	1	0	0	0	0.0165682
9588	5590.08	1	0	1	0	0	0	0.0166696
9590	5590.11	1	0	1	0	0	0	0.0165908
9592	5590.15	1	0	1	0	0	0	0.0165957
9594	5590.18	1	0	1	0	0	0	0.0165905
9596	5590.21	1	0	1	0	0	0	0.0166264
9598	5590.25	1	0	1	0	0	0	0.0167132
9600	5590.28	1	0	1	0	0	0	0.0166846
9602	5590.31	1	0	1	0	0	0	0.0166961
9604	5590.35	1	0	1	0	0	0	0.0166355
9606	5590.38	1	0	1	0	0	0	0.0165971
9608	5590.41	1	0	1	0	0	0	0.0166292
9610	5590.45	1	0	1	0	0	0	0.0165451
9612	5590.48	1	0	1	0	0	0	0.0165023
9614	5590.51	1	0	1	0	0	0	0.0164977
9616	5590.55	1	0	1	0	0	0	0.0164932
9618	5590.58	1	0	1	0	0	0	0.0164803
9620	5590.61	1	0	1	0	0	0	0.0164646
9622	5590.65	1	0	1	0	0	0	0.0164702
9624	5590.68	1	0	1	0	0	0	0.0165096
9626	5590.71	1	0	1	0	0	0	0.0164381
9628	5590.75	1	0	1	0	0	0	0.0164308
9630	5590.78	1	0	1	0	0	0	0.0164524
9632	5590.81	1	0	1	0	0	0	0.0163903
9634	5590.85	1	0	1	0	0	0	0.0164053
9636	5590.88	1	0	1	0	0	0	0.0164203
9638	5590.91	1	0	1	0	0	0	0.0163554
9640	5590.95	1	0	1	0	0	0	0.016384
9642	5590.98	1	0	1	0	0	0	0.0163628
9644	5591.01	1	0	1	0	0	0	0.016337
9646	5591.05	1	0	1	0	0	0	0.016367
9648	5591.08	1	0	1	0	0	0	0.0163272
9650	5591.11	1	0	1	0	0	0	0.0163903
9652	5591.15	1	0	1	0	0	0	0.016338
9654	5591.18	1	0	1	0	0	0	0.0163663
9656	5591.21	1	0	1	0	0	0	0.0163279
9658	5591.25	1	0	1	0	0	0	0.0163038
9660	5591.28	1	0	1	0	0	0	0.0163345
9662	5591.31	1	0	1	0	0	0	0.016315
9664	5591.35	1	0	1	0	0	0	0.0163328
9666	5591.38	1	0	1	0	0	0	0.0163509
9668	5591.41	1	0	1	0	0	0	0.0162543
9670	5591.45	1	0	1	0	0	0	0.0162892
9672	5591.48	1	0	1	0	0	0	0.0163502
9674	5591.51	1	0	1	0	0	0	0.0162871
9676	5591.55	1	0	1	0	0	0	0.0163084
9678	5591.58	1	0	1	0	0	0	0.0164172
9680	5591.61	1	0	1	0	0	0	0.0163914
9682	5591.65	1	0	1	0	0	0	0.0162916
9684	5591.68	1	0	1	0	0	0	0.0162616
9686	5591.71	1	0	1	0	0	0	0.0162676
9688	5591.75	1	0	1	0	0	0	0.016239
9690	5591.78	1	0	1	0	0	0	0.0162651
9692	5591.81	1	0	1	0	0	0	0.0161884
9694	5591.85	1	0	1	0	0	0	0.0162759
9696	5591.88	1	0	1	0	0	0	0.0162083
9698	5591.91	1	0	1	0	0	0	0.0162243
9700	5591.95	1	0	1	0	0	0	0.0162024
9702	5591.98	1	0	1	0	0	0	0.016216
9704	5592.01	1	0	1	0	0	0	0.0162979
9706	5592.05	1	0	1	0	0	0	0.0162362
9708	5592.08	1	0	1	0	0	0	0.0162662
9710	5592.11	1	0	1	0	0	0	0.0163882
9712	5592.15	1	0	1	0	0	0	0.0163537
9714	5592.18	1	0	1	0	0	0	0.0164318
9716	5592.21	1	0	1	0	0	0	0.0164852
9718	5592.25	1	0	1	0	0	0	0.0165413
9720	5592.28	1	0	1	0	0	0	0.0165786
9722	5592.31	1	0	1	0	0	0	0.0166494
9724	5592.35	1	0	1	0	0	0	0.0168531
9726	5592.38	1	0	1	0	0	0	0.0167763
9728	5592.41	1	0	1	0	0	0	0.0168129
9730	5592.45	1	0	1	0	0	0	0.0168548
9732	5592.48	1	0	1	0	0	0	0.0168074
9734	5592.51	1	0	1	0	0	0	0.0168464
9736	5592.55	1	0	1	0	0	0	0.0167666
9738	5592.58	1	0	1	0	0	0	0.0168095
9740	5592.61	1	0	1	0	0	0	0.0167666
9742	5592.65	1	0	1	0	0	0	0.0166822
9744	5592.68	1	0	1	0	0	0	0.0166546
9746	5592.71	1	0	1	0	0	0	0.0165818
9748	5592.75	1	0	1	0	0	0	0.0166567
9750	5592.78	1	0	1	0	0	0	0.0165933
9752	5592.81	1	0	1	0	0	0	0.0165033
9754	5592.85	1	0	1	0	0	0	0.0164768
9756	5592.88	1	0	1	0	0	0	0.0165141
9758	5592.91	1	0	1	0	0	0	0.0167066
9760	5592.95	1	0	1	0	0	0	0.0167087
9762	5592.98	1	0	1	0	0	0	0.0167359
9764	5593.01	1	0	1	0	0	0	0.0167024
9766	5593.05	1	0	1	0	0	0	0.0167251
9768	5593.08	1	0	1	0	0	0	0.0167429
9770	5593.11	1	0	1	0	0	0	0.016754
9772	5593.15	1	0	1	0	0	0	0.0166689
9774	5593.18	1	0	1	0	0	0	0.0166484
9776	5593.21	1	0	1	0	0	0	0.0165922
9778	5593.25	1	0	1	0	0	0	0.0165605
9780	5593.28	1	0	1	0	0	0	0.0165685
9782	5593.31	1	0	1	0	0	0	0.0166267
9784	5593.35	1	0	1	0	0	0	0.0165549
9786	5593.38	1	0	1	0	0	0	0.0165598
9788	5593.41	1	0	1	0	0	0	0.0166518
9790	5593.45	1	0	1	0	0	0	0.0166226
9792	5593.48	1	0	1	0	0	0	0.0165364
9794	5593.51	1	0	1	0	0	0	0.0165253
9796	5593.55	1	0	1	0	0	0	0.016526
9798	5593.58	1	0	1	0	0	0	0.0165218
9800	5593.61	1	0	1	0	0	0	0.0166208
9802	5593.65	1	0	1	0	0	0	0.0166728
9804	5593.68	1	0	1	0	0	0	0.0166212
9806	5593.71	1	0	1	0	0	0	0.0166271
9808	5593.75	1	0	1	0	0	0	0.0166853
9810	5593.78	1	0	1	0	0	0	0.0166016
9812	5593.81	1	0	1	0	0	0	0.0165926
9814	5593.85	1	0	1	0	0	0	0.0165856
9816	5593.88	1	0	1	0	0	0	0.0166456
9818	5593.91	1	0	1	0	0	0	0.01661
9820	5593.95	1	0	1	0	0	0	0.016647
9822	5593.98	1	0	1	0	0	0	0.0165797
9824	5594.01	1	0	1	0	0	0	0.0165825
9826	5594.05	1	0	1	0	0	0	0.0164914
9828	5594.08	1	0	1	0	0	0	0.0164642
9830	5594.11	1	0	1	0	0	0	0.0165539
9832	5594.15	1	0	1	0	0	0	0.0164887
9834	5594.18	1	0	1	0	0	0	0.0164329
9836	5594.21	1	0	1	0	0	0	0.0165165
9838	5594.25	1	0	1	0	0	0	0.0165204
9840	5594.28	1	0	1	0	0	0	0.016496
9842	5594.31	1	0	1	0	0	0	0.016579
9844	5594.35	1	0	1	0	0	0	0.0165392
9846	5594.38	1	0	1	0	0	0	0.0165357
9848	5594.41	1	0	1	0	0	0	0.0165382
9850	5594.45	1	0	1	0	0	0	0.0166892
9852	5594.48	1	0	1	0	0	0	0.0165887
9854	5594.51	1	0	1	0	0	0	0.0165525
9856	5594.55	1	0	1	0	0	0	0.0165235
9858	5594.58	1	0	1	0	0	0	0.0166156
9860	5594.61	1	0	1	0	0	0	0.0165988
9862	5594.65	1	0	1	0	0	0	0.0165622
9864	5594.68	1	0	1	0	0	0	0.0165664
9866	5594.71	1	0	1	0	0	0	0.0166044
9868	5594.75	1	0	1	0	0	0	0.016519
9870	5594.78	1	0	1	0	0	0	0.0164555
9872	5594.81	1	0	1	0	0	0	0.0165239
9874	5594.85	1	0	1	0	0	0	0.0165228
9876	5594.88	1	0	1	0	0	0	0.0164817
9878	5594.91	1	0	1	0	0	0	0.0165145
9880	5594.95	1	0	1	0	0	0	0.0165845
9882	5594.98	1	0	1	0	0	0	0.016488
9884	5595.01	1	0	1	0	0	0	0.0164479
9886	5595.05	1	0	1	0	0	0	0.0165186
9888	5595.08	1	0	1	0	0	0	0.0164991
9890	5595.11	1	0	1	0	0	0	0.0164513
9892	5595.15	1	0	1	0	0	0	0.0164259
9894	5595.18	1	0	1	0	0	0	0.016458
9896	5595.21	1	0	1	0	0	0	0.0164336
9898	5595.25	1	0	1	0	0	0	0.0165023
9900	5595.28	1	0	1	0	0	0	0.0165343
9902	5595.31	1	0	1	0	0	0	0.0164074
9904	5595.35	1	0	1	0	0	0	0.0164112
9906	5595.38	1	0	1	0	0	0	0.0165312
9908	5595.41	1	0	1	0	0	0	0.0164848
9910	5595.45	1	0	1	0	0	0	0.0164928
9912	5595.48	1	0	1	0	0	0	0.0164855
9914	5595.51	1	0	1	0	0	0	0.0164778
9916	5595.55	1	0	1	0	0	0	0.0165092
9918	5595.58	1	0	1	0	0	0	0.0165706
9920	5595.61	1	0	1	0	0	0	0.0165807
9922	5595.65	1	0	1	0	0	0	0.0164887
9924	5595.68	1	0	1	0	0	0	0.0165152
9926	5595.71	1	0	1	0	0	0	0.016458
9928	5595.75	1	0	1	0	0	0	0.0164611
9930	5595.78	1	0	1	0	0	0	0.0165057
9932	5595.81	1	0	1	0	0	0	0.0164942
9934	5595.85	1	0	1	0	0	0	0.0164963
9936	5595.88	1	0	1	0	0	0	0.0164189
9938	5595.91	1	0	1	0	0	0	0.0164381
9940	5595.95	1	0	1	0	0	0	0.0164503
9942	5595.98	1	0	1	0	0	0	0.0163757
9944	5596.01	1	0	1	0	0	0	0.0163802
9946	5596.05	1	0	1	0	0	0	0.0163516
9948	5596.08	1	0	1	0	0	0	0.0162979
9950	5596.11	1	0	1	0	0	0	0.0163056
9952	5596.15	1	0	1	0	0	0	0.0162941
9954	5596.18	1	0	1	0	0	0	0.0163373
9956	5596.21	1	0	1	0	0	0	0.0162941
9958	5596.25	1	0	1	0	0	0	0.0163492
9960	5596.28	1	0	1	0	0	0	0.0163415
9962	5596.31	1	0	1	0	0	0	0.01636
9964	5596.35	1	0	1	0	0	0	0.0163527
9966	5596.38	1	0	1	0	0	0	0.0163059
9968	5596.41	1	0	1	0	0	0	0.016346
9970	5596.45	1	0	1	0	0	0	0.0163523
9972	5596.48	1	0	1	0	0	0	0.0163746
9974	5596.51	1	0	1	0	0	0	0.0164262
9976	5596.55	1	0	1	0	0	0	0.0164098
9978	5596.58	1	0	1	0	0	0	0.0164454
9980	5596.61	1	0	1	0	0	0	0.016263
9982	5596.65	1	0	1	0	0	0	0.016422
9984	5596.68	1	0	1	0	0	0	0.0163464
9986	5596.71	1	0	1	0	0	0	0.0162658
9988	5596.75	1	0	1	0	0	0	0.0162878
9990	5596.78	1	0	1	0	0	0	0.0162599
9992	5596.81	1	0	1	0	0	0	0.0163457
9994	5596.85	1	0	1	0	0	0	0.0163551
9996	5596.88	1	0	1	0	0	0	0.0163199
9998	5596.91	1	0	1	0	0	0	0.0163474
10000	5596.95	1	0	1	0	0	0	0.0163178
10002	5596.98	1	0	1	0	0	0	0.0163596
10004	5597.01	1	0	1	0	0	0	0.016337
10006	5597.05	1	0	1	0	0	0	0.0163966
10008	5597.08	1	0	1	0	0	0	0.0164412
10010	5597.11	1	0	1	0	0	0	0.0164503
10012	5597.15	1	0	1	0	0	0	0.0164862
10014	5597.18	1	0	1	0	0	0	0.0164472
10016	5597.21	1	0	1	0	0	0	0.0164123
10018	5597.25	1	0	1	0	0	0	0.0164102
10020	5597.28	1	0	1	0	0	0	0.0163896
10022	5597.31	1	0	1	0	0	0	0.0164158
10024	5597.35	1	0	1	0	0	0	0.016375
10026	5597.38	1	0	1	0	0	0	0.016299
10028	5597.41	1	0	1	0	0	0	0.0163649
10030	5597.45	1	0	1	0	0	0	0.0163227
10032	5597.48	1	0	1	0	0	0	0.0163119
10034	5597.51	1	0	1	0	0	0	0.0164339
10036	5597.55	1	0	1	0	0	0	0.0164395
10038	5597.58	1	0	1	0	0	0	0.0164587
10040	5597.61	1	0	1	0	0	0	0.0164771
10042	5597.65	1	0	1	0	0	0	0.0164391
10044	5597.68	1	0	1	0	0	0	0.0164426
10046	5597.71	1	0	1	0	0	0	0.0163833
10048	5597.75	1	0	1	0	0	0	0.0163969
10050	5597.78	1	0	1	0	0	0	0.0163
10052	5597.81	1	0	1	0	0	0	0.0162874
10054	5597.85	1	0	1	0	0	0	0.0162902
10056	5597.88	1	0	1	0	0	0	0.0162871
10058	5597.91	1	0	1	0	0	0	0.0163202
10060	5597.95	1	0	1	0	0	0	0.0164172
10062	5597.98	1	0	1	0	0	0	0.016481
10064	5598.01	1	0	1	0	0	0	0.0165124
10066	5598.05	1	0	1	0	0	0	0.0164789
10068	5598.08	1	0	1	0	0	0	0.0165626
10070	5598.11	1	0	1	0	0	0	0.0165866
10072	5598.15	1	0	1	0	0	0	0.0167083
10074	5598.18	1	0	1	0	0	0	0.0166756
10076	5598.21	1	0	1	0	0	0	0.016753
10078	5598.25	1	0	1	0	0	0	0.0167212
10080	5598.28	1	0	1	0	0	0	0.0166707
10082	5598.31	1	0	1	0	0	0	0.0166515
10084	5598.35	1	0	1	0	0	0	0.0166194
10086	5598.38	1	0	1	0	0	0	0.0166459
10088	5598.41	1	0	1	0	0	0	0.0166219
10090	5598.45	1	0	1	0	0	0	0.0165451
10092	5598.48	1	0	1	0	0	0	0.0165929
10094	5598.51	1	0	1	0	0	0	0.0164782
10096	5598.55	1	0	1	0	0	0	0.0163495
10098	5598.58	1	0	1	0	0	0	0.0163223
10100	5598.61	1	0	1	0	0	0	0.0162194
10102	5598.65	1	0	1	0	0	0	0.0162836
10104	5598.68	1	0	1	0	0	0	0.0162327
10106	5598.71	1	0	1	0	0	0	0.0162425
10108	5598.75	1	0	1	0	0	0	0.0163255
10110	5598.78	1	0	1	0	0	0	0.016255
10112	5598.81	1	0	1	0	0	0	0.0162843
10114	5598.85	1	0	1	0	0	0	0.0162648
10116	5598.88	1	0	1	0	0	0	0.0162397
10118	5598.91	1	0	1	0	0	0	0.0162508
10120	5598.95	1	0	1	0	0	0	0.0162613
10122	5598.98	1	0	1	0	0	0	0.0162456
10124	5599.01	1	0	1	0	0	0	0.0161487
10126	5599.05	1	0	1	0	0	0	0.0162303
10128	5599.08	1	0	1	0	0	0	0.016233
10130	5599.11	1	0	1	0	0	0	0.0162749
10132	5599.15	1	0	1	0	0	0	0.016247
10134	5599.18	1	0	1	0	0	0	0.0162432
10136	5599.21	1	0	1	0	0	0	0.0162812
10138	5599.25	1	0	1	0	0	0	0.0162909
10140	5599.28	1	0	1	0	0	0	0.016277
10142	5599.31	1	0	1	0	0	0	0.0162498
10144	5599.35	1	0	1	0	0	0	0.016224
10146	5599.38	1	0	1	0	0	0	0.0162428
10148	5599.41	1	0	1	0	0	0	0.0162798
10150	5599.45	1	0	1	0	0	0	0.0163377
10152	5599.48	1	0	1	0	0	0	0.0163973
10154	5599.51	1	0	1	0	0	0	0.0164527
10156	5599.55	1	0	1	0	0	0	0.0165605
10158	5599.58	1	0	1	0	0	0	0.0166581
10160	5599.61	1	0	1	0	0	0	0.0165957
10162	5599.65	1	0	1	0	0	0	0.0165832
10164	5599.68	1	0	1	0	0	0	0.0166034
10166	5599.71	1	0	1	0	0	0	0.0165894
10168	5599.75	1	0	1	0	0	0	0.0165319
10170	5599.78	1	0	1	0	0	0	0.0165019
10172	5599.81	1	0	1	0	0	0	0.0165354
10174	5599.85	1	0	1	0	0	0	0.0164377
10176	5599.88	1	0	1	0	0	0	0.0163202
10178	5599.91	1	0	1	0	0	0	0.0162969
10180	5599.95	1	0	1	0	0	0	0.0163439
10182	5599.98	1	0	1	0	0	0	0.0163192
10184	5600.01	1	0	1	0	0	0	0.0163167
10186	5600.05	1	0	1	0	0	0	0.0163596
10188	5600.08	1	0	1	0	0	0	0.016331
10190	5600.11	1	0	1	0	0	0	0.0163844
10192	5600.15	1	0	1	0	0	0	0.016375
10194	5600.18	1	0	1	0	0	0	0.016413
10196	5600.21	1	0	1	0	0	0	0.0165235
10198	5600.25	1	0	1	0	0	0	0.016488
10200	5600.28	1	0	1	0	0	0	0.0165326
10202	5600.31	1	0	1	0	0	0	0.0166104
10204	5600.35	1	0	1	0	0	0	0.0165755
10206	5600.38	1	0	1	0	0	0	0.0166215
10208	5600.41	1	0	1	0	0	0	0.0164702
10210	5600.45	1	0	1	0	0	0	0.0165382
10212	5600.48	1	0	1	0	0	0	0.0164395
10214	5600.51	1	0	1	0	0	0	0.0163561
10216	5600.55	1	0	1	0	0	0	0.0164311
10218	5600.58	1	0	1	0	0	0	0.0163251
10220	5600.61	1	0	1	0	0	0	0.0163216
10222	5600.65	1	0	1	0	0	0	0.0162215
10224	5600.68	1	0	1	0	0	0	0.0162337
10226	5600.71	1	0	1	0	0	0	0.0162578
10228	5600.75	1	0	1	0	0	0	0.0162944
10230	5600.78	1	0	1	0	0	0	0.0163861
10232	5600.81	1	0	1	0	0	0	0.0164154
10234	5600.85	1	0	1	0	0	0	0.0164757
10236	5600.88	1	0	1	0	0	0	0.0165378
10238	5600.91	1	0	1	0	0	0	0.0165553
10240	5600.95	1	0	1	0	0	0	0.0166006
10242	5600.98	1	0	1	0	0	0	0.0166647
10244	5601.01	1	0	1	0	0	0	0.0166756
10246	5601.05	1	0	1	0	0	0	0.0166543
10248	5601.08	1	0	1	0	0	0	0.0165444
10250	5601.11	1	0	1	0	0	0	0.0164897
10252	5601.15	1	0	1	0	0	0	0.016444
10254	5601.18	1	0	1	0	0	0	0.0165368
10256	5601.21	1	0	1	0	0	0	0.0164796
10258	5601.25	1	0	1	0	0	0	0.0165361
10260	5601.28	1	0	1	0	0	0	0.0166599
10262	5601.31	1	0	1	0	0	0	0.0165908
10264	5601.35	1	0	1	0	0	0	0.0166163
10266	5601.38	1	0	1	0	0	0	0.0165148
10268	5601.41	1	0	1	0	0	0	0.0164559
10270	5601.45	1	0	1	0	0	0	0.0164423
10272	5601.48	1	0	1	0	0	0	0.0163255
10274	5601.51	1	0	1	0	0	0	0.0162554
10276	5601.55	1	0	1	0	0	0	0.0162334
10278	5601.58	1	0	1	0	0	0	0.0162013
10280	5601.61	1	0	1	0	0	0	0.0162766
10282	5601.65	1	0	1	0	0	0	0.0162505
10284	5601.68	1	0	1	0	0	0	0.0163122
10286	5601.71	1	0	1	0	0	0	0.0162257
10288	5601.75	1	0	1	0	0	0	0.0162226
10290	5601.78	1	0	1	0	0	0	0.0162215
10292	5601.81	1	0	1	0	0	0	0.0161591
10294	5601.85	1	0	1	0	0	0	0.0161685
10296	5601.88	1	0	1	0	0	0	0.0161326
10298	5601.91	1	0	1	0	0	0	0.0161281
10300	5601.95	1	0	1	0	0	0	0.0161602
10302	5601.98	1	0	1	0	0	0	0.0161434
10304	5602.01	1	0	1	0	0	0	0.0160521
10306	5602.05	1	0	1	0	0	0	0.0160514
10308	5602.08	1	0	1	0	0	0	0.0161323
10310	5602.11	1	0	1	0	0	0	0.0160807
10312	5602.15	1	0	1	0	0	0	0.0160974
10314	5602.18	1	0	1	0	0	0	0.0161501
10316	5602.21	1	0	1	0	0	0	0.0161005
10318	5602.25	1	0	1	0	0	0	0.0161379
10320	5602.28	1	0	1	0	0	0	0.0160859
10322	5602.31	1	0	1	0	0	0	0.0161012
10324	5602.35	1	0	1	0	0	0	0.0160468
10326	5602.38	1	0	1	0	0	0	0.0160685
10328	5602.41	1	0	1	0	0	0	0.0160904
10330	5602.45	1	0	1	0	0	0	0.016201
10332	5602.48	1	0	1	0	0	0	0.0161598
10334	5602.51	1	0	1	0	0	0	0.0160604
10336	5602.55	1	0	1	0	0	0	0.0161731
10338	5602.58	1	0	1	0	0	0	0.0162365
10340	5602.61	1	0	1	0	0	0	0.0162965
10342	5602.65	1	0	1	0	0	0	0.0164412
10344	5602.68	1	0	1	0	0	0	0.0164991
10346	5602.71	1	0	1	0	0	0	0.0165441
10348	5602.75	1	0	1	0	0	0	0.0165675
10350	5602.78	1	0	1	0	0	0	0.0165664
10352	5602.81	1	0	1	0	0	0	0.0164876
10354	5602.85	1	0	1	0	0	0	0.0165814
10356	5602.88	1	0	1	0	0	0	0.0165127
10358	5602.91	1	0	1	0	0	0	0.0165427
10360	5602.95	1	0	1	0	0	0	0.0165029
10362	5602.98	1	0	1	0	0	0	0.0165235
10364	5603.01	1	0	1	0	0	0	0.0164608
10366	5603.05	1	0	1	0	0	0	0.0164207
10368	5603.08	1	0	1	0	0	0	0.0163596
10370	5603.11	1	0	1	0	0	0	0.016345
10372	5603.15	1	0	1	0	0	0	0.0163527
10374	5603.18	1	0	1	0	0	0	0.0163551
10376	5603.21	1	0	1	0	0	0	0.0164688
10378	5603.25	1	0	1	0	0	0	0.0164712
10380	5603.28	1	0	1	0	0	0	0.0165615
10382	5603.31	1	0	1	0	0	0	0.0166055
10384	5603.35	1	0	1	0	0	0	0.0165877
10386	5603.38	1	0	1	0	0	0	0.0165336
10388	5603.41	1	0	1	0	0	0	0.0165239
10390	5603.45	1	0	1	0	0	0	0.0165797
10392	5603.48	1	0	1	0	0	0	0.0165699
10394	5603.51	1	0	1	0	0	0	0.0165043
10396	5603.55	1	0	1	0	0	0	0.016466
10398	5603.58	1	0	1	0	0	0	0.0164883
10400	5603.61	1	0	1	0	0	0	0.0165465
10402	5603.65	1	0	1	0	0	0	0.0166602
10404	5603.68	1	0	1	0	0	0	0.0165936
10406	5603.71	1	0	1	0	0	0	0.0165877
10408	5603.75	1	0	1	0	0	0	0.0166009
10410	5603.78	1	0	1	0	0	0	0.0165699
10412	5603.81	1	0	1	0	0	0	0.0166117
10414	5603.85	1	0	1	0	0	0	0.0165713
10416	5603.88	1	0	1	0	0	0	0.0165026
10418	5603.91	1	0	1	0	0	0	0.0164855
10420	5603.95	1	0	1	0	0	0	0.0163736
10422	5603.98	1	0	1	0	0	0	0.0164555
10424	5604.01	1	0	1	0	0	0	0.016369
10426	5604.05	1	0	1	0	0	0	0.0163746
10428	5604.08	1	0	1	0	0	0	0.0164217
10430	5604.11	1	0	1	0	0	0	0.0164398
10432	5604.15	1	0	1	0	0	0	0.0165183
10434	5604.18	1	0	1	0	0	0	0.0164806
10436	5604.21	1	0	1	0	0	0	0.0165866
10438	5604.25	1	0	1	0	0	0	0.0165514
10440	5604.28	1	0	1	0	0	0	0.0165256
10442	5604.31	1	0	1	0	0	0	0.0165385
10444	5604.35	1	0	1	0	0	0	0.0164527
10446	5604.38	1	0	1	0	0	0	0.0165033
10448	5604.41	1	0	1	0	0	0	0.0165005
10450	5604.45	1	0	1	0	0	0	0.0164838
10452	5604.48	1	0	1	0	0	0	0.0164119
10454	5604.51	1	0	1	0	0	0	0.0164468
10456	5604.55	1	0	1	0	0	0	0.016526
10458	5604.58	1	0	1	0	0	0	0.016496
10460	5604.61	1	0	1	0	0	0	0.0164322
10462	5604.65	1	0	1	0	0	0	0.0165291
10464	5604.68	1	0	1	0	0	0	0.0164311
10466	5604.71	1	0	1	0	0	0	0.016436
10468	5604.75	1	0	1	0	0	0	0.0164489
10470	5604.78	1	0	1	0	0	0	0.0164928
10472	5604.81	1	0	1	0	0	0	0.0164709
10474	5604.85	1	0	1	0	0	0	0.0164071
10476	5604.88	1	0	1	0	0	0	0.0165486
10478	5604.91	1	0	1	0	0	0	0.0165186
10480	5604.95	1	0	1	0	0	0	0.016565
10482	5604.98	1	0	1	0	0	0	0.0165734
10484	5605.01	1	0	1	0	0	0	0.0165382
10486	5605.05	1	0	1	0	0	0	0.0164158
10488	5605.08	1	0	1	0	0	0	0.0164479
10490	5605.11	1	0	1	0	0	0	0.0165012
10492	5605.15	1	0	1	0	0	0	0.016443
10494	5605.18	1	0	1	0	0	0	0.0164412
10496	5605.21	1	0	1	0	0	0	0.0164949
10498	5605.25	1	0	1	0	0	0	0.0165134
10500	5605.28	1	0	1	0	0	0	0.0165103
10502	5605.31	1	0	1	0	0	0	0.0164615
10504	5605.35	1	0	1	0	0	0	0.0165204
10506	5605.38	1	0	1	0	0	0	0.0165375
10508	5605.41	1	0	1	0	0	0	0.0165148
10510	5605.45	1	0	1	0	0	0	0.0165221
10512	5605.48	1	0	1	0	0	0	0.0166041
10514	5605.51	1	0	1	0	0	0	0.0166104
10516	5605.55	1	0	1	0	0	0	0.0165727
10518	5605.58	1	0	1	0	0	0	0.0165078
10520	5605.61	1	0	1	0	0	0	0.0166215
10522	5605.65	1	0	1	0	0	0	0.0165298
10524	5605.68	1	0	1	0	0	0	0.0164764
10526	5605.71	1	0	1	0	0	0	0.0164723
10528	5605.75	1	0	1	0	0	0	0.0165239
10530	5605.78	1	0	1	0	0	0	0.0165678
10532	5605.81	1	0	1	0	0	0	0.0165608
10534	5605.85	1	0	1	0	0	0	0.0165225
10536	5605.88	1	0	1	0	0	0	0.0165877
10538	5605.91	1	0	1	0	0	0	0.0165054
10540	5605.95	1	0	1	0	0	0	0.0165319
10542	5605.98	1	0	1	0	0	0	0.0163973
10544	5606.01	1	0	1	0	0	0	0.0164531
10546	5606.05	1	0	1	0	0	0	0.0163844
10548	5606.08	1	0	1	0	0	0	0.0163683
10550	5606.11	1	0	1	0	0	0	0.0164517
10552	5606.15	1	0	1	0	0	0	0.0164336
10554	5606.18	1	0	1	0	0	0	0.0164078
10556	5606.21	1	0	1	0	0	0	0.0163819
10558	5606.25	1	0	1	0	0	0	0.0163683
10560	5606.28	1	0	1	0	0	0	0.0162791
10562	5606.31	1	0	1	0	0	0	0.0163105
10564	5606.35	1	0	1	0	0	0	0.0162941
10566	5606.38	1	0	1	0	0	0	0.0162609
10568	5606.41	1	0	1	0	0	0	0.0163269
10570	5606.45	1	0	1	0	0	0	0.0163481
10572	5606.48	1	0	1	0	0	0	0.0163656
10574	5606.51	1	0	1	0	0	0	0.0163987
10576	5606.55	1	0	1	0	0	0	0.0163666
10578	5606.58	1	0	1	0	0	0	0.0163624
10580	5606.61	1	0	1	0	0	0	0.0163146
10582	5606.65	1	0	1	0	0	0	0.0163269
10584	5606.68	1	0	1	0	0	0	0.0163042
10586	5606.71	1	0	1	0	0	0	0.0162993
10588	5606.75	1	0	1	0	0	0	0.0163893
10590	5606.78	1	0	1	0	0	0	0.0163575
10592	5606.81	1	0	1	0	0	0	0.0163994
10594	5606.85	1	0	1	0	0	0	0.0163889
10596	5606.88	1	0	1	0	0	0	0.0165277
10598	5606.91	1	0	1	0	0	0	0.0166104
10600	5606.95	1	0	1	0	0	0	0.0166083
10602	5606.98	1	0	1	0	0	0	0.0164301
10604	5607.01	1	0	1	0	0	0	0.0163558
10606	5607.05	1	0	1	0	0	0	0.0162934
10608	5607.08	1	0	1	0	0	0	0.0163066
10610	5607.11	1	0	1	0	0	0	0.0162397
10612	5607.15	1	0	1	0	0	0	0.0162927
10614	5607.18	1	0	1	0	0	0	0.0163506
10616	5607.21	1	0	1	0	0	0	0.0163488
10618	5607.25	1	0	1	0	0	0	0.0163488
10620	5607.28	1	0	1	0	0	0	0.0163743
10622	5607.31	1	0	1	0	0	0	0.0165092
10624	5607.35	1	0	1	0	0	0	0.0165622
10626	5607.38	1	0	1	0	0	0	0.0165709
10628	5607.41	1	0	1	0	0	0	0.0165141
10630	5607.45	1	0	1	0	0	0	0.0163174
10632	5607.48	1	0	1	0	0	0	0.0163342
10634	5607.51	1	0	1	0	0	0	0.0163418
10636	5607.55	1	0	1	0	0	0	0.0163129
10638	5607.58	1	0	1	0	0	0	0.0164618
10640	5607.61	1	0	1	0	0	0	0.0163502
10642	5607.65	1	0	1	0	0	0	0.0163307
10644	5607.68	1	0	1	0	0	0	0.016248
10646	5607.71	1	0	1	0	0	0	0.0162414
10648	5607.75	1	0	1	0	0	0	0.016353
10650	5607.78	1	0	1	0	0	0	0.0165162
10652	5607.81	1	0	1	0	0	0	0.0165842
10654	5607.85	1	0	1	0	0	0	0.0165988
10656	5607.88	1	0	1	0	0	0	0.01658
10658	5607.91	1	0	1	0	0	0	0.0164601
10660	5607.95	1	0	1	0	0	0	0.0164057
10662	5607.98	1	0	1	0	0	0	0.0164039
10664	5608.01	1	0	1	0	0	0	0.0163537
10666	5608.05	1	0	1	0	0	0	0.0165702
10668	5608.08	1	0	1	0	0	0	0.0166246
10670	5608.11	1	0	1	0	0	0	0.0165389
10672	5608.15	1	0	1	0	0	0	0.0165619
10674	5608.18	1	0	1	0	0	0	0.0165598
10676	5608.21	1	0	1	0	0	0	0.0165661
10678	5608.25	1	0	1	0	0	0	0.0165127
10680	5608.28	1	0	1	0	0	0	0.016497
10682	5608.31	1	0	1	0	0	0	0.0164576
10684	5608.35	1	0	1	0	0	0	0.0163847
10686	5608.38	1	0	1	0	0	0	0.0164098
10688	5608.41	1	0	1	0	0	0	0.0164207
10690	5608.45	1	0	1	0	0	0	0.0164726
10692	5608.48	1	0	1	0	0	0	0.0164513
10694	5608.51	1	0	1	0	0	0	0.016443
10696	5608.55	1	0	1	0	0	0	0.0164855
10698	5608.58	1	0	1	0	0	0	0.0164684
10700	5608.61	1	0	1	0	0	0	0.0164594
10702	5608.65	1	0	1	0	0	0	0.0164615
10704	5608.68	1	0	1	0	0	0	0.0163879
10706	5608.71	1	0	1	0	0	0	0.0164064
10708	5608.75	1	0	1	0	0	0	0.0163711
10710	5608.78	1	0	1	0	0	0	0.0164186
10712	5608.81	1	0	1	0	0	0	0.0164325
10714	5608.85	1	0	1	0	0	0	0.0163077
10716	5608.88	1	0	1	0	0	0	0.0163917
10718	5608.91	1	0	1	0	0	0	0.0163422
10720	5608.95	1	0	1	0	0	0	0.0162822
10722	5608.98	1	0	1	0	0	0	0.0163593
10724	5609.01	1	0	1	0	0	0	0.016269
10726	5609.05	1	0	1	0	0	0	0.0163028
10728	5609.08	1	0	1	0	0	0	0.0162435
10730	5609.11	1	0	1	0	0	0	0.0162613
10732	5609.15	1	0	1	0	0	0	0.0162704
10734	5609.18	1	0	1	0	0	0	0.0162271
10736	5609.21	1	0	1	0	0	0	0.0161835
10738	5609.25	1	0	1	0	0	0	0.016156
10740	5609.28	1	0	1	0	0	0	0.0161605
10742	5609.31	1	0	1	0	0	0	0.0161752
10744	5609.35	1	0	1	0	0	0	0.0161528
10746	5609.38	1	0	1	0	0	0	0.0161762
10748	5609.41	1	0	1	0	0	0	0.0161546
10750	5609.45	1	0	1	0	0	0	0.016201
10752	5609.48	1	0	1	0	0	0	0.0161752
10754	5609.51	1	0	1	0	0	0	0.0161881
10756	5609.55	1	0	1	0	0	0	0.0161943
10758	5609.58	1	0	1	0	0	0	0.016149
10760	5609.61	1	0	1	0	0	0	0.0161689
10762	5609.65	1	0	1	0	0	0	0.0161218
10764	5609.68	1	0	1	0	0	0	0.0160671
10766	5609.71	1	0	1	0	0	0	0.0160852
10768	5609.75	1	0	1	0	0	0	0.0160646
10770	5609.78	1	0	1	0	0	0	0.0161103
10772	5609.81	1	0	1	0	0	0	0.0160758
10774	5609.85	1	0	1	0	0	0	0.0161187
10776	5609.88	1	0	1	0	0	0	0.0162079
10778	5609.91	1	0	1	0	0	0	0.0161567
10780	5609.95	1	0	1	0	0	0	0.0161183
10782	5609.98	1	0	1	0	0	0	0.0160685
10784	5610.01	1	0	1	0	0	0	0.0161117
10786	5610.05	1	0	1	0	0	0	0.0161305
10788	5610.08	1	0	1	0	0	0	0.0161389
10790	5610.11	1	0	1	0	0	0	0.0161609
10792	5610.15	1	0	1	0	0	0	0.0161249
10794	5610.18	1	0	1	0	0	0	0.0161612
10796	5610.21	1	0	1	0	0	0	0.016171
10798	5610.25	1	0	1	0	0	0	0.0161061
10800	5610.28	1	0	1	0	0	0	0.016096
10802	5610.31	1	0	1	0	0	0	0.0161054
10804	5610.35	1	0	1	0	0	0	0.0161333
10806	5610.38	1	0	1	0	0	0	0.0160664
10808	5610.41	1	0	1	0	0	0	0.0161856
10810	5610.45	1	0	1	0	0	0	0.0161344
10812	5610.48	1	0	1	0	0	0	0.0160772
10814	5610.51	1	0	1	0	0	0	0.0161113
10816	5610.55	1	0	1	0	0	0	0.0160932
10818	5610.58	1	0	1	0	0	0	0.0161274
10820	5610.61	1	0	1	0	0	0	0.0160835
10822	5610.65	1	0	1	0	0	0	0.016142
10824	5610.68	1	0	1	0	0	0	0.0162993
10826	5610.71	1	0	1	0	0	0	0.0161539
10828	5610.75	1	0	1	0	0	0	0.016186
10830	5610.78	1	0	1	0	0	0	0.0162177
10832	5610.81	1	0	1	0	0	0	0.0162487
10834	5610.85	1	0	1	0	0	0	0.0162041
10836	5610.88	1	0	1	0	0	0	0.0162697
10838	5610.91	1	0	1	0	0	0	0.0164866
10840	5610.95	1	0	1	0	0	0	0.0164866
10842	5610.98	1	0	1	0	0	0	0.0165117
10844	5611.01	1	0	1	0	0	0	0.0166295
10846	5611.04	1	0	1	0	0	0	0.0166511
10848	5611.08	1	0	1	0	0	0	0.0166233
10850	5611.11	1	0	1	0	0	0	0.0166086
10852	5611.14	1	0	1	0	0	0	0.0165608
10854	5611.18	1	0	1	0	0	0	0.0165845
10856	5611.21	1	0	1	0	0	0	0.0163589
10858	5611.24	1	0	1	0	0	0	0.0163851
10860	5611.28	1	0	1	0	0	0	0.0164635
10862	5611.31	1	0	1	0	0	0	0.0165981
10864	5611.34	1	0	1	0	0	0	0.0166532
10866	5611.38	1	0	1	0	0	0	0.0165981
10868	5611.41	1	0	1	0	0	0	0.0166707
10870	5611.44	1	0	1	0	0	0	0.0166857
10872	5611.48	1	0	1	0	0	0	0.0165716
10874	5611.51	1	0	1	0	0	0	0.0165322
10876	5611.54	1	0	1	0	0	0	0.0165134
10878	5611.58	1	0	1	0	0	0	0.0165797
10880	5611.61	1	0	1	0	0	0	0.0164897
10882	5611.64	1	0	1	0	0	0	0.0165288
10884	5611.68	1	0	1	0	0	0	0.0165288
10886	5611.71	1	0	1	0	0	0	0.0165511
10888	5611.74	1	0	1	0	0	0	0.0165009
10890	5611.78	1	0	1	0	0	0	0.0163757
10892	5611.81	1	0	1	0	0	0	0.0164531
10894	5611.84	1	0	1	0	0	0	0.0164625
10896	5611.88	1	0	1	0	0	0	0.0164653
10898	5611.91	1	0	1	0	0	0	0.0163983
10900	5611.94	1	0	1	0	0	0	0.0164541
10902	5611.98	1	0	1	0	0	0	0.0164126
10904	5612.01	1	0	1	0	0	0	0.0163903
10906	5612.04	1	0	1	0	0	0	0.0164716
10908	5612.08	1	0	1	0	0	0	0.0164681
10910	5612.11	1	0	1	0	0	0	0.0163757
10912	5612.14	1	0	1	0	0	0	0.016414
10914	5612.18	1	0	1	0	0	0	0.016301
10916	5612.21	1	0	1	0	0	0	0.0162609
10918	5612.24	1	0	1	0	0	0	0.0163115
10920	5612.28	1	0	1	0	0	0	0.016367
10922	5612.31	1	0	1	0	0	0	0.016337
10924	5612.34	1	0	1	0	0	0	0.0163579
10926	5612.38	1	0	1	0	0	0	0.0163014
10928	5612.41	1	0	1	0	0	0	0.0162264
10930	5612.44	1	0	1	0	0	0	0.0162721
10932	5612.48	1	0	1	0	0	0	0.0164635
10934	5612.51	1	0	1	0	0	0	0.0164646
10936	5612.54	1	0	1	0	0	0	0.0164126
10938	5612.58	1	0	1	0	0	0	0.0163087
10940	5612.61	1	0	1	0	0	0	0.0163868
10942	5612.64	1	0	1	0	0	0	0.0163038
10944	5612.68	1	0	1	0	0	0	0.0162616
10946	5612.71	1	0	1	0	0	0	0.0164193
10948	5612.74	1	0	1	0	0	0	0.0163928
10950	5612.78	1	0	1	0	0	0	0.016414
10952	5612.81	1	0	1	0	0	0	0.0163757
10954	5612.84	1	0	1	0	0	0	0.0164597
10956	5612.88	1	0	1	0	0	0	0.0164367
10958	5612.91	1	0	1	0	0	0	0.0163432
10960	5612.94	1	0	1	0	0	0	0.0163275
10962	5612.98	1	0	1	0	0	0	0.0164297
10964	5613.01	1	0	1	0	0	0	0.0162568
10966	5613.04	1	0	1	0	0	0	0.0163143
10968	5613.08	1	0	1	0	0	0	0.0163931
10970	5613.11	1	0	1	0	0	0	0.0164803
10972	5613.14	1	0	1	0	0	0	0.0163886
10974	5613.18	1	0	1	0	0	0	0.0164123
10976	5613.21	1	0	1	0	0	0	0.0163792
10978	5613.24	1	0	1	0	0	0	0.016331
10980	5613.28	1	0	1	0	0	0	0.0163771
10982	5613.31	1	0	1	0	0	0	0.0163066
10984	5613.34	1	0	1	0	0	0	0.0162979
10986	5613.38	1	0	1	0	0	0	0.0163405
10988	5613.41	1	0	1	0	0	0	0.016376
10990	5613.44	1	0	1	0	0	0	0.0163694
10992	5613.48	1	0	1	0	0	0	0.0163481
10994	5613.51	1	0	1	0	0	0	0.0163457
10996	5613.54	1	0	1	0	0	0	0.0163282
10998	5613.58	1	0	1	0	0	0	0.0164112
11000	5613.61	1	0	1	0	0	0	0.0164231
11002	5613.64	1	0	1	0	0	0	0.0163823
11004	5613.68	1	0	1	0	0	0	0.0163481
11006	5613.71	1	0	1	0	0	0	0.0162822
11008	5613.74	1	0	1	0	0	0	0.0163
11010	5613.78	1	0	1	0	0	0	0.0162843
11012	5613.81	1	0	1	0	0	0	0.0162634
11014	5613.84	1	0	1	0	0	0	0.0163363
11016	5613.88	1	0	1	0	0	0	0.0163192
11018	5613.91	1	0	1	0	0	0	0.0162641
11020	5613.94	1	0	1	0	0	0	0.0162913
11022	5613.98	1	0	1	0	0	0	0.0162672
11024	5614.01	1	0	1	0	0	0	0.0163129
11026	5614.04	1	0	1	0	0	0	0.0163038
11028	5614.08	1	0	1	0	0	0	0.0162372
11030	5614.11	1	0	1	0	0	0	0.0162697
11032	5614.14	1	0	1	0	0	0	0.0163432
11034	5614.18	1	0	1	0	0	0	0.01636
11036	5614.21	1	0	1	0	0	0	0.0163119
11038	5614.24	1	0	1	0	0	0	0.0162854
11040	5614.28	1	0	1	0	0	0	0.016239
11042	5614.31	1	0	1	0	0	0	0.016299
11044	5614.34	1	0	1	0	0	0	0.0162578
11046	5614.38	1	0	1	0	0	0	0.0162578
11048	5614.41	1	0	1	0	0	0	0.0163087
11050	5614.44	1	0	1	0	0	0	0.016316
11052	5614.48	1	0	1	0	0	0	0.0163948
11054	5614.51	1	0	1	0	0	0	0.0163785
11056	5614.54	1	0	1	0	0	0	0.0163052
11058	5614.58	1	0	1	0	0	0	0.0163506
11060	5614.61	1	0	1	0	0	0	0.0162861
11062	5614.64	1	0	1	0	0	0	0.0162805
11064	5614.68	1	0	1	0	0	0	0.0162181
11066	5614.71	1	0	1	0	0	0	0.0161929
11068	5614.74	1	0	1	0	0	0	0.0162065
11070	5614.78	1	0	1	0	0	0	0.0161846
11072	5614.81	1	0	1	0	0	0	0.0162055
11074	5614.84	1	0	1	0	0	0	0.0161445
11076	5614.88	1	0	1	0	0	0	0.0161916
11078	5614.91	1	0	1	0	0	0	0.0162965
11080	5614.94	1	0	1	0	0	0	0.0163439
11082	5614.98	1	0	1	0	0	0	0.0163342
11084	5615.01	1	0	1	0	0	0	0.0162494
11086	5615.04	1	0	1	0	0	0	0.0163997
11088	5615.08	1	0	1	0	0	0	0.0164098
11090	5615.11	1	0	1	0	0	0	0.0164161
11092	5615.14	1	0	1	0	0	0	0.0164116
11094	5615.18	1	0	1	0	0	0	0.016398
11096	5615.21	1	0	1	0	0	0	0.0163795
11098	5615.24	1	0	1	0	0	0	0.0163373
11100	5615.28	1	0	1	0	0	0	0.016443
11102	5615.31	1	0	1	0	0	0	0.0163722
11104	5615.34	1	0	1	0	0	0	0.0163942
11106	5615.38	1	0	1	0	0	0	0.0163942
11108	5615.41	1	0	1	0	0	0	0.0163105
11110	5615.44	1	0	1	0	0	0	0.0163795
11112	5615.48	1	0	1	0	0	0	0.0163328
11114	5615.51	1	0	1	0	0	0	0.0164088
11116	5615.54	1	0	1	0	0	0	0.0164123
11118	5615.58	1	0	1	0	0	0	0.0163122
11120	5615.61	1	0	1	0	0	0	0.0163942
11122	5615.64	1	0	1	0	0	0	0.0164367
11124	5615.68	1	0	1	0	0	0	0.016497
11126	5615.71	1	0	1	0	0	0	0.0166529
11128	5615.74	1	0	1	0	0	0	0.0165807
11130	5615.78	1	0	1	0	0	0	0.016594
11132	5615.81	1	0	1	0	0	0	0.0165197
11134	5615.84	1	0	1	0	0	0	0.016541
11136	5615.88	1	0	1	0	0	0	0.0165887
11138	5615.91	1	0	1	0	0	0	0.0166229
11140	5615.94	1	0	1	0	0	0	0.0165117
11142	5615.98	1	0	1	0	0	0	0.0165305
11144	5616.01	1	0	1	0	0	0	0.0165197
11146	5616.04	1	0	1	0	0	0	0.0165078
11148	5616.08	1	0	1	0	0	0	0.0165089
11150	5616.11	1	0	1	0	0	0	0.0165584
11152	5616.14	1	0	1	0	0	0	0.0164674
11154	5616.18	1	0	1	0	0	0	0.0164698
11156	5616.21	1	0	1	0	0	0	0.0165587
11158	5616.24	1	0	1	0	0	0	0.0164757
11160	5616.28	1	0	1	0	0	0	0.0164363
11162	5616.31	1	0	1	0	0	0	0.0164667
11164	5616.34	1	0	1	0	0	0	0.0165441
11166	5616.38	1	0	1	0	0	0	0.0165615
11168	5616.41	1	0	1	0	0	0	0.016541
11170	5616.44	1	0	1	0	0	0	0.0164367
11172	5616.48	1	0	1	0	0	0	0.0163635
11174	5616.51	1	0	1	0	0	0	0.0163973
11176	5616.54	1	0	1	0	0	0	0.016331
11178	5616.58	1	0	1	0	0	0	0.0162585
11180	5616.61	1	0	1	0	0	0	0.0162707
11182	5616.64	1	0	1	0	0	0	0.0162149
11184	5616.68	1	0	1	0	0	0	0.0162602
11186	5616.71	1	0	1	0	0	0	0.016254
11188	5616.74	1	0	1	0	0	0	0.0162501
11190	5616.78	1	0	1	0	0	0	0.0162407
11192	5616.81	1	0	1	0	0	0	0.01621
11194	5616.84	1	0	1	0	0	0	0.0162111
11196	5616.88	1	0	1	0	0	0	0.0162268
11198	5616.91	1	0	1	0	0	0	0.016209
11200	5616.94	1	0	1	0	0	0	0.0161971
11202	5616.98	1	0	1	0	0	0	0.0161602
11204	5617.01	1	0	1	0	0	0	0.0161975
11206	5617.04	1	0	1	0	0	0	0.016171
11208	5617.08	1	0	1	0	0	0	0.0162453
11210	5617.11	1	0	1	0	0	0	0.016172
11212	5617.14	1	0	1	0	0	0	0.016156
11214	5617.18	1	0	1	0	0	0	0.016216
11216	5617.21	1	0	1	0	0	0	0.0162693
11218	5617.24	1	0	1	0	0	0	0.0163541
11220	5617.28	1	0	1	0	0	0	0.016376
11222	5617.31	1	0	1	0	0	0	0.016488
11224	5617.34	1	0	1	0	0	0	0.0164545
11226	5617.38	1	0	1	0	0	0	0.0164859
11228	5617.41	1	0	1	0	0	0	0.0164967
11230	5617.44	1	0	1	0	0	0	0.0164855
11232	5617.48	1	0	1	0	0	0	0.0164001
11234	5617.51	1	0	1	0	0	0	0.0163241
11236	5617.54	1	0	1	0	0	0	0.0163223
11238	5617.58	1	0	1	0	0	0	0.016307
11240	5617.61	1	0	1	0	0	0	0.0161999
11242	5617.64	1	0	1	0	0	0	0.0162547
11244	5617.68	1	0	1	0	0	0	0.0162341
11246	5617.71	1	0	1	0	0	0	0.0161999
11248	5617.74	1	0	1	0	0	0	0.0162913
11250	5617.78	1	0	1	0	0	0	0.0163077
11252	5617.81	1	0	1	0	0	0	0.0163561
11254	5617.84	1	0	1	0	0	0	0.016451
11256	5617.88	1	0	1	0	0	0	0.0164928
11258	5617.91	1	0	1	0	0	0	0.0165207
11260	5617.94	1	0	1	0	0	0	0.0163809
11262	5617.98	1	0	1	0	0	0	0.0164559
11264	5618.01	1	0	1	0	0	0	0.016443
11266	5618.04	1	0	1	0	0	0	0.0164214
11268	5618.08	1	0	1	0	0	0	0.0164489
11270	5618.11	1	0	1	0	0	0	0.016375
11272	5618.14	1	0	1	0	0	0	0.0162425
11274	5618.18	1	0	1	0	0	0	0.016337
11276	5618.21	1	0	1	0	0	0	0.0163335
11278	5618.24	1	0	1	0	0	0	0.016262
11280	5618.28	1	0	1	0	0	0	0.0163188
11282	5618.31	1	0	1	0	0	0	0.016511
11284	5618.34	1	0	1	0	0	0	0.0165207
11286	5618.38	1	0	1	0	0	0	0.0165734
11288	5618.41	1	0	1	0	0	0	0.0165239
11290	5618.44	1	0	1	0	0	0	0.0164388
11292	5618.48	1	0	1	0	0	0	0.0165751
11294	5618.51	1	0	1	0	0	0	0.0165364
11296	5618.54	1	0	1	0	0	0	0.0164562
11298	5618.58	1	0	1	0	0	0	0.0164029
11300	5618.61	1	0	1	0	0	0	0.0163729
11302	5618.64	1	0	1	0	0	0	0.0164294
11304	5618.68	1	0	1	0	0	0	0.0164165
11306	5618.71	1	0	1	0	0	0	0.016422
11308	5618.74	1	0	1	0	0	0	0.016367
11310	5618.78	1	0	1	0	0	0	0.0163959
11312	5618.81	1	0	1	0	0	0	0.016338
11314	5618.84	1	0	1	0	0	0	0.0163551
11316	5618.88	1	0	1	0	0	0	0.0164437
11318	5618.91	1	0	1	0	0	0	0.0163736
11320	5618.94	1	0	1	0	0	0	0.0164039
11322	5618.98	1	0	1	0	0	0	0.0163945
11324	5619.01	1	0	1	0	0	0	0.0163931
11326	5619.04	1	0	1	0	0	0	0.0164838
11328	5619.08	1	0	1	0	0	0	0.0164695
11330	5619.11	1	0	1	0	0	0	0.0164451
11332	5619.14	1	0	1	0	0	0	0.0164119
11334	5619.18	1	0	1	0	0	0	0.0163868
11336	5619.21	1	0	1	0	0	0	0.0162881
11338	5619.24	1	0	1	0	0	0	0.0163091
11340	5619.28	1	0	1	0	0	0	0.0162787
11342	5619.31	1	0	1	0	0	0	0.0162278
11344	5619.34	1	0	1	0	0	0	0.0162372
11346	5619.38	1	0	1	0	0	0	0.0162149
11348	5619.41	1	0	1	0	0	0	0.0162606
11350	5619.44	1	0	1	0	0	0	0.0162958
11352	5619.48	1	0	1	0	0	0	0.0162819
11354	5619.51	1	0	1	0	0	0	0.0163537
11356	5619.54	1	0	1	0	0	0	0.0162944
11358	5619.58	1	0	1	0	0	0	0.0163098
11360	5619.61	1	0	1	0	0	0	0.0163178
11362	5619.64	1	0	1	0	0	0	0.0163935
11364	5619.68	1	0	1	0	0	0	0.0164524
11366	5619.71	1	0	1	0	0	0	0.0164806
11368	5619.74	1	0	1	0	0	0	0.0164329
11370	5619.78	1	0	1	0	0	0	0.0164412
11372	5619.81	1	0	1	0	0	0	0.0164353
11374	5619.84	1	0	1	0	0	0	0.0164091
11376	5619.88	1	0	1	0	0	0	0.0163363
11378	5619.91	1	0	1	0	0	0	0.0163049
11380	5619.94	1	0	1	0	0	0	0.016277
11382	5619.98	1	0	1	0	0	0	0.0162494
11384	5620.01	1	0	1	0	0	0	0.016254
11386	5620.04	1	0	1	0	0	0	0.0162707
11388	5620.08	1	0	1	0	0	0	0.0163554
11390	5620.11	1	0	1	0	0	0	0.0162261
11392	5620.14	1	0	1	0	0	0	0.0162487
11394	5620.18	1	0	1	0	0	0	0.0162951
11396	5620.21	1	0	1	0	0	0	0.0162198
11398	5620.24	1	0	1	0	0	0	0.0162944
11400	5620.28	1	0	1	0	0	0	0.0163506
11402	5620.31	1	0	1	0	0	0	0.0163146
11404	5620.34	1	0	1	0	0	0	0.0162704
11406	5620.38	1	0	1	0	0	0	0.016293
11408	5620.41	1	0	1	0	0	0	0.0162062
[truncated: 16,159 more rows]

[truncated: 27 more sheets: Mouse 3_470 Signal, Mouse 3_KeyDow Signal, Mouse 3_Velocity Signal, Mouse 4_415 Signal, Mouse 4_470 Signal, Mouse 4_KeyDow Signal, Mouse 4_Velocity Signal, Mouse 5_415 Signal, Mouse 5_470 Signal, Mouse 5_KeyDow Signal, Mouse 5_Velocity Signal, Mouse 6_415 Signal, Mouse 6_470 Signal, Mouse 6_KeyDow Signal, Mouse 6_Velocity Signal, Mouse 7_415 Signal, Mouse 7_470 Signal, Mouse 7_KeyDow Signal, Mouse 7_Velocity Signal, Mouse 8_415 Signal …]
