# Supplementary material for: Glutamatergic supramammillary nucleus neurons respond to threatening stressors and promote active coping
Source: eLife. 2024 Jun 3;12:RP90972. doi: 10.7554/eLife.90972 (PMC11147510; doi:10.7554/eLife.90972)
Supplement: Figure 4—source data 1. [file elife-90972-fig4-data1.xlsx]

## Sheet: 4B-Heatmap Chr2 
Figure 4B		0:00-0:10	0:10-0:20	0:20-0:30	0:30-0:40	0:40-0:50	0:50-1:00	1:00-1:10	1:10-1:20	1:20-1:30	1:30-1:40	1:40-1:50	1:50-2:00	2:00-2:10	2:10-2:20	2:20-2:30	2:30-2:40	2:40-2:50	2:50-3:00	3:00-3:10	3:10-3:20	3:20-3:30	3:30-3:40	3:40-3:50	3:50-4:00	4:00-4:10	4:10-4:20	4:20-4:30	4:30-4:40	4:40-4:50	4:50-5:00	5:00-5:10	5:10-5:20	5:20-5:30	5:30-5:40	5:40-5:50	5:50-6:00	6:00-6:10	6:10-6:20	6:20-6:30	6:30-6:40	6:40-6:50	6:50-7:00	7:00-7:10	7:10-7:20	7:20-7:30	7:30-7:40	7:40-7:50	7:50-8:00
	Mouse 1	2	7	7	7	7	7	7	7	7	7	7	7	5	5	5	5	5	5	5	5	5	5	5	5	5	5	5	5	5	5	4	8	6	8	6	6	4	2	8	8	8	8	8	4	4	4	6	6
	Mouse 2	5	5	7	7	1	5	5	5	5	5	1	1	5	3	3	3	3	8	6	6	8	7	7	5	5	7	7	5	5	5	2	9	2	9	4	4	4	4	9	4	4	9	4	4	4	4	4	4
	Mouse 3	5	7	7	5	3	7	7	7	5	5	5	3	7	7	5	5	7	6	6	7	7	5	5	5	7	5	3	3	5	5	4	4	2	6	2	8	8	4	4	8	8	6	8	4	8	8	4	8
	Mouse 4	5	8	6	6	2	8	7	7	7	7	3	8	7	7	8	2	7	7	8	7	7	5	7	3	2	2	7	7	5	5	3	6	6	3	6	6	6	6	8	6	6	8	6	6	8	6	6	8
	Mouse 5	5	5	5	5	5	5	7	5	5	7	5	2	5	7	7	7	1	5	5	7	7	7	5	1	5	5	7	7	5	5	2	4	4	4	4	4	4	4	4	4	4	4	4	4	4	4	4	2
	Mouse 6	5	2	6	7	7	7	6	5	2	6	5	8	8	6	5	6	6	8	6	6	8	6	5	8	8	5	5	2	5	2	4	4	8	6	8	4	4	6	4	8	6	6	8	4	6	6	6	8
	Mouse 7	5	2	5	5	3	5	5	5	5	7	5	7	2	5	3	3	7	7	5	5	5	7	2	2	2	5	6	5	2	5	2	9	9	2	9	2	2	8	8	8	8	8	6	8	6	8	8	6
	Mouse 8	5	1	3	5	5	5	2	2	2	5	5	5	2	5	5	3	5	1	1	5	2	5	5	5	5	5	5	5	2	5	4	4	9	4	4	4	4	4	4	4	4	4	9	5	5	5	5	9
	Mouse 9	5	2	2	5	7	7	5	5	2	2	2	2	2	3	2	3	1	1	2	5	2	2	5	5	2	5	2	3	2	2	6	6	6	6	6	6	6	6	8	9	8	8	8	8	8	8	8	8
	Mouse 10	5	5	5	5	5	5	5	5	5	5	5	5	5	5	5	5	5	5	5	5	5	5	5	5	5	5	5	5	5	5	4	2	4	2	4	4	4	4	2	4	4	4	4	4	4	8	8	4
	Mouse 11	5	5	6	5	5	2	5	5	6	8	5	5	7	7	6	6	6	2	8	6	8	8	8	7	8	8	8	8	5	5	8	6	6	9	6	6	6	6	6	8	8	8	8	8	8	8	8	8
	Mouse 12	3	6	8	6	6	8	8	3	2	7	2	2	2	2	3	2	6	6	8	6	6	8	6	8	8	6	6	2	2	2	4	4	4	4	4	4	4	4	4	4	4	4	4	4	4	4	4	4
	Mouse 13	5	5	5	5	5	5	1	1	1	1	1	1	1	1	1	5	5	5	7	5	7	1	1	5	1	5	7	7	7	5	4	8	8	6	8	8	8	6	2	2	8	6	8	8	6	8	8	8
	Mouse 14	5	5	5	5	5	5	5	5	5	5	5	5	5	5	5	5	5	5	5	5	5	5	5	5	5	5	5	5	5	5	5	5	5	2	2	5	2	2	5	2	5	5	2	2	8	8	8	5
	Mouse 15	5	3	3	3	3	2	7	1	2	2	3	5	3	3	2	2	5	6	5	3	3	3	5	5	5	5	2	5	5	5	6	4	8	4	4	2	4	6	8	6	6	8	4	6	8	2	6	6
	Mouse 16	5	5	5	5	5	5	5	5	5	5	5	5	5	5	5	5	2	2	2	4	8	6	6	6	5	6	6	6	8	8	5	8	8	2	8	8	8	6	6	6	6	8	8	8	8	8	6	8
		NEW CODES
		Behavior Key
		1- Grooming
		2- Rearing
		3- Walking
		4- Hyper Locomotion
		5- Stationary
		6- Treading
		7- Chewing
		8- Digging
		9- Jumping
[truncated: 42 more columns]

## Sheet: 4B-Heatmap Control
4B Cont.		0:00-0:10	0:10-0:20	0:20-0:30	0:30-0:40	0:40-0:50	0:50-1:00	1:00-1:10	1:10-1:20	1:20-1:30	1:30-1:40	1:40-1:50	1:50-2:00	2:00-2:10	2:10-2:20	2:20-2:30	2:30-2:40	2:40-2:50	2:50-3:00	3:00-3:10	3:10-3:20	3:20-3:30	3:30-3:40	3:40-3:50	3:50-4:00	4:00-4:10	4:10-4:20	4:20-4:30	4:30-4:40	4:40-4:50	4:50-5:00	5:00-5:10	5:10-5:20	5:20-5:30	5:30-5:40	5:40-5:50	5:50-6:00	6:00-6:10	6:10-6:20	6:20-6:30	6:30-6:40	6:40-6:50	6:50-7:00	7:00-7:10	7:10-7:20	7:20-7:30	7:30-7:40	7:40-7:50	7:50-8:00
	Mouse 1	5	2	2	2	5	5	2	7	7	7	7	5	5	2	5	5	2	2	5	5	2	5	2	2	5	3	5	5	2	2	5	5	5	2	5	5	3	8	8	8	8	6	6	3	6	6	3	5
	Mouse 2	5	5	2	2	3	3	8	6	6	8	2	5	6	6	6	6	6	2	3	8	3	3	3	1	1	2	2	2	2	2	5	5	5	5	8	3	8	7	7	8	8	8	2	5	2	5	5	5
	Mouse 3	5	2	5	5	3	5	5	5	8	8	8	8	5	3	1	7	8	6	8	3	2	1	3	1	6	3	5	7	7	7	5	5	5	5	5	5	1	7	6	6	2	1	7	5	5	2	5	7
	Mouse 4	2	8	8	8	8	8	3	3	5	1	1	7	2	6	3	8	8	8	8	8	6	8	6	6	6	2	2	2	2	5	5	5	8	8	8	8	8	6	6	6	6	6	5	7	7	2	1	1
	Mouse 5	5	5	8	5	8	8	8	8	7	6	7	5	5	7	2	8	8	5	7	8	8	8	8	5	7	5	2	5	7	5	1	1	1	1	1	1	1	1	1	1	5	2	5	5	8	6	6	7
	Mouse 6	5	5	5	8	5	5	5	5	5	8	6	2	5	2	8	5	1	1	1	5	5	5	5	5	5	5	5	2	5	2	5	5	5	5	5	2	5	5	5	2	5	5	5	7	5	5	3	7
	Mouse 7	8	3	2	3	5	2	2	2	2	2	2	5	5	2	2	5	2	1	5	2	2	2	5	2	5	5	2	2	2	5	2	5	2	2	2	2	5	8	2	2	5	2	5	2	5	5	2	5
	Mouse 8	2	2	2	2	2	2	2	2	2	2	2	5	5	8	8	5	5	5	5	2	2	7	7	2	8	8	8	3	8	2	5	2	5	2	5	5	8	2	8	2	5	5	5	8	8	5	3	5
	Mouse 9	5	5	5	5	5	5	5	6	6	6	6	6	5	6	6	3	2	6	2	6	8	5	5	6	2	5	5	5	5	5	5	5	5	5	2	5	5	2	5	5	5	6	5	5	2	5	5	6
	Mouse 10	5	2	2	5	5	5	5	5	5	2	5	5	5	2	5	5	5	5	5	5	5	5	5	5	5	5	5	5	5	5	8	5	5	5	2	2	5	5	5	5	5	5	5	6	5	5	5	2
	Mouse 11	2	5	2	2	5	5	8	8	8	1	2	7	7	5	2	2	5	8	6	7	6	5	5	5	5	5	7	5	2	5	2	2	3	5	6	6	6	6	6	6	8	8	5	3	8	6	2	2
	Mouse 12	8	2	2	8	8	8	8	2	5	5	1	5	5	2	5	2	2	5	3	2	5	2	5	5	8	6	8	5	5	2	5	5	5	5	5	5	5	5	2	5	5	5	7	5	5	5	5	5
	Mouse 13	2	3	3	2	2	3	3	1	3	1	1	2	5	5	2	5	5	5	5	5	5	5	5	2	5	5	5	5	5	5	1	5	5	5	2	2	2	2	5	5	5	5	5	1	5	5	5	1
	Mouse 14	5	5	2	2	5	1	1	8	8	8	8	8	8	8	8	3	2	8	8	2	2	1	1	2	2	5	5	5	5	5	5	3	3	3	8	8	5	5	5	3	5	5	1	2	5	2	3	8
	Mouse 15	5	5	5	5	5	5	3	8	8	8	6	1	5	2	5	8	8	5	5	2	5	2	2	3	2	5	5	2	2	5	5	2	5	8	5	5	7	8	8	8	8	7	8	8	8	8	3	2
	Mouse 16	3	3	3	1	1	8	8	3	3	2	5	5	8	5	5	5	5	2	5	5	5	5	5	5	5	5	2	5	5	5	5	5	5	5	5	5	5	1	2	2	5	5	5	5	3	2	5	2
	Mouse 17	5	5	5	5	5	5	5	8	2	3	7	5	2	5	5	2	5	5	8	8	5	7	5	7	7	2	5	6	5	5	5	7	5	5	5	5	5	5	7	7	6	5	5	6	6	6	6	6
		NEW CODES
		Behavior Key
		1- Grooming
		2- Rearing
		3- Walking
		4- Hyper Locomotion
		5- Stationary
		6- Treading
		7- Chewing
		8- Digging
		9- Jumping
[truncated: 42 more columns]

## Sheet: 4C-Number of Jumps
	4C
		# of Jumps
			Cre+																Cre-
			Mouse 1	Mouse 2	Mouse 3	Mouse 4	Mouse 5	Mouse 6	Mouse 7	Mouse 8	Mouse 9	Mouse 10	Mouse 11	Mouse 12	Mouse 13	Mouse 14	Mouse 15		Mouse 1	Mouse 2	Mouse 3	Mouse 4	Mouse 5	Mouse 6	Mouse 7	Mouse 8	Mouse 9	Mouse 10	Mouse 11	Mouse 12	Mouse 13	Mouse 14	Mouse 15	Mouse 16
		Pre	0	0	0	0	0	0	0	0	0	0	0	0	0	0	0		0	1	0	0	0	0	0	0	0	0	0	0	0	0	0	0
		Stim	72	0	10	2	63	12	27	82	44	28	41	1	0	0	0		1	0	0	0	0	0	0	0	0	0	0	0	0	0	0	0
		Post	0	0	0	0	0	0	0	0	0	0	0	0	0	0	0		10	0	0	0	0	0	0	0	0	0	0	0	0	0	0	0

## Sheet: 4D-Digging_Treading
	4D
		Time Spent Digging/treading
			Cre+																Cre-
			Mouse 1	Mouse 2	Mouse 3	Mouse 4	Mouse 5	Mouse 6	Mouse 7	Mouse 8	Mouse 9	Mouse 10	Mouse 11	Mouse 12	Mouse 13	Mouse 14	Mouse 15		Mouse 1	Mouse 2	Mouse 3	Mouse 4	Mouse 5	Mouse 6	Mouse 7	Mouse 8	Mouse 9	Mouse 10	Mouse 11	Mouse 12	Mouse 13	Mouse 14	Mouse 15	Mouse 16
		Pre	56	0	0	47	0	174	19	0	0	0	132.6	0	0	3	44		0	28	88	168	127	44	15	72	76	0	66	36	20	14	43	8
		Stim	0	270	265	295	0	257	202	82	220	41	143.4	260.4	45	168	199		106	82	43	184	116	20	26	78	40	15	21	53	7	36	7	0
		Post	0	32	0	0	0	0	0	0	37	3	0	13	0	4	20		145	84	80	109	207	150	15	0	62	75	27	4	18	0	4	0

## Sheet: 4E-Grooming
	4E
		Time Spent Grooming
			Cre+																Cre-
			Mouse 1	Mouse 2	Mouse 3	Mouse 4	Mouse 5	Mouse 6	Mouse 7	Mouse 8	Mouse 9	Mouse 10	Mouse 11	Mouse 12	Mouse 13	Mouse 14	Mouse 15		Mouse 1	Mouse 2	Mouse 3	Mouse 4	Mouse 5	Mouse 6	Mouse 7	Mouse 8	Mouse 9	Mouse 10	Mouse 11	Mouse 12	Mouse 13	Mouse 14	Mouse 15	Mouse 16
		Pre	42	3	0	16	46	0	3	26	23	0	2	69	0	6	0		0	0	2	32	3	56	23	6	0	0	11	12	5	0	7	18
		Stim	0	0	0	0	0	0	0	0	0	0	0	0	0	0	1		17	17	33	39	43	0	4	8	0	16	8	0	14	2	0	77
		Post	34	29	46	90	63	186	64	25	51	22.5	54	53	0	15	24		20	0	14	9	1	0	10	5	13	0	0	3	0	0	7	24
