# Supplementary material for: Glutamatergic supramammillary nucleus neurons respond to threatening stressors and promote active coping
Source: eLife. 2024 Jun 3;12:RP90972. doi: 10.7554/eLife.90972 (PMC11147510; doi:10.7554/eLife.90972)
Supplement: Figure 5—figure supplement 1—source data 1. [file elife-90972-fig5-figsupp1-data1.xlsx]

## Sheet: RTTP - Time Spent Stim Side
		% on Stim Side in Real Time Place Preference/Aversion
			ChR2																											eYFP
			Mouse 1	Mouse 2	Mouse 3	Mouse 4	Mouse 5	Mouse 6	Mouse 7	Mouse 8	Mouse 9	Mouse 10	Mouse 11	Mouse 12	Mouse 13	Mouse 14	Mouse 15	Mouse 16	Mouse 17	Mouse 18	Mouse 19	Mouse 20	Mouse 21	Mouse 22	Mouse 23	Mouse 24	Mouse 25	Mouse 26		Mouse 1	Mouse 2	Mouse 3	Mouse 4	Mouse 5	Mouse 6	Mouse 7	Mouse 8	Mouse 9	Mouse 10	Mouse 11	Mouse 12	Mouse 13	Mouse 14	Mouse 15	Mouse 16	Mouse 17	Mouse 18	Mouse 19	Mouse 20
		Baseline	37.82	42.62	51	48.574	57.4215	52.6027	41.8723	45.265	40.8547	49.4058	47.57	38.74	57.83	53.91	60.91	48.58	51.95	37.82	42.62	51	48.574	57.4215	52.6027	41.8723	45.265	40.8547		57.01	49.96	50.25	47.73	38.7	55.77	68.02	37.82	37.71	60.0691	47.9113	47.68	57.11	81.47	45.23	57.01	49.96	50.25	47.73	38.7
		10 hz	19.5	58.86	44.98	62.7417	74.3003	62.1982	42.1517	48	52.5963	43.6742	48.13	31.2	32.89	53.39	52.65	38.59	43.51	19.5	58.86	44.98	62.7417	74.3003	62.1982	42.1517	48	52.5963		55.79	49.67	57.44	57.99	56.4	36.23	53.16	52.82	47.63	68.554	50.8891	47.17	63.95	23.04	55.19	55.79	49.67	57.44	57.99	56.4
[truncated: 6 more columns]

## Sheet: OFT - Center vs Perimeter
		Center Vs Perimeter in Open Field Test
			ChR2											eYFP
			Mouse 1	Mouse 2	Mouse 3	Mouse 4	Mouse 5	Mouse 6	Mouse 7	Mouse 8	Mouse 9	Mouse 10		Mouse 1	Mouse 2	Mouse 3	Mouse 4	Mouse 5	Mouse 6	Mouse 7	Mouse 8	Mouse 9	Mouse 10	Mouse 11
		Center	149	280	352	296	264	424	298	266	332	282		441	642	321	243	173	340	294	372	271	334	375
		Perimeter	1055	924	847	903	936	776	901	933	867	917		764	562	884	962	1031	864	910	832	933	866	825

## Sheet: OFT - Total Distance
		Total Distance in Open Field Test
			ChR2											eYFP
			Mouse 1	Mouse 2	Mouse 3	Mouse 4	Mouse 5	Mouse 6	Mouse 7	Mouse 8	Mouse 9	Mouse 10		Mouse 1	Mouse 2	Mouse 3	Mouse 4	Mouse 5	Mouse 6	Mouse 7	Mouse 8	Mouse 9	Mouse 10	Mouse 11
		Total Distance (m)	15.9012	11.7092	10.3499	14.567	7.77262	9.4171	12.6183	11.43	13.0085	9.40465		19.4555	20.2811	16.0446	18.7307	16.7051	9.13653	11.8432	17.445	13.1355	12.5833	9.23795
