# Supplementary material for: Glutamatergic supramammillary nucleus neurons respond to threatening stressors and promote active coping
Source: eLife. 2024 Jun 3;12:RP90972. doi: 10.7554/eLife.90972 (PMC11147510; doi:10.7554/eLife.90972)
Supplement: Figure 5—source data 1. [file elife-90972-fig5-data1.xlsx]

## Sheet: 5C-Time Spent Stim Side
	Figure 5C
		% on Stim Side
			Cre+																				Cre-
			Mouse 1	Mouse 2	Mouse 3	Mouse 4	Mouse 5	Mouse 6	Mouse 7	Mouse 8	Mouse 9	Mouse 10	Mouse 11	Mouse 12	Mouse 13	Mouse 14	Mouse 15	Mouse 16	Mouse 17	Mouse 18	Mouse 19		Mouse 1	Mouse 2	Mouse 3	Mouse 4	Mouse 5	Mouse 6	Mouse 7	Mouse 8	Mouse 9	Mouse 10	Mouse 11	Mouse 12	Mouse 13	Mouse 14	Mouse 15	Mouse 16	Mouse 17	Mouse 18	Mouse 19	Mouse 20	Mouse 21
		Baseline	50.55	52.77	52.4	43.94	52.88	54.3	53.68	51.33	49.95	63.476	51.6974	40.6118	46.3921	43.8754	58.7	40.9	47.45	57.49	40.76		49.16	61.84	51.26	40.89	43.58	49.15	51.26	47.7	56.95	55.53	60.32	54.29	57.3868	60.0684	49.5592	48.45	44.54	34.06	42.16	48.3	49.53
		1 Hz	45.62	43.79	23.72	43.94	45.63	43.72	24.56	27.29	19.38	16.4017	32.116	17.5299	27.4542	46.3259	50.99	41.8	49.71	37.05	39.33				44.62	53.06	56.42	48.82	45.67	45.64	48.14	47.74	52.37	46.48	56.3731	48.9579	52.6742	46.9	47.7	41.03	47.74	50.69	55.17
		5 Hz	51.44	35.02	11.16	29.77	43.5	10.8	7.07	6.17	7.01	5.44897	9.67845	5.1671	7.6984	4.40486	49.79	23.79	21.49	25.92	21.24		54.09	42.11	54.33	45.3	33.9	49.09	43.28	54.52	55.56	57.01	59.62	61.12	43.8134	55.4363	62.3723	48.29	41.14	39.28	45.35	46.5	55.65
		10 Hz	3.32	34.46	4.4	13.58	23.2	5.87	2.06	2.93	4.22	3.94163	5.68276	1.4614	6.06908	12.3298	46.58	18.38	6.14	10.9	22.9		51.67	54.46	46.42	41.73	7.54	49.85	58.22	59.29	50.06	48.07	54.11	55.58	53.5472	51.9589	59.1226	52.45	49.12	44.31	47.76	43.71	47.52
		20 Hz	5.57	19.85	17.42	4.18	17.12	0.83	0.9	1.04	2.5	1.07072	3.58718	2.69436	1.36163	3.63574	28.62	5.35	2.75	5.33	7.13		56.91	47.44	59.02	43.18	46.88	61	55.28	53.64	58.01	50.53	60.62	53.83	52.1061	47.2098	46.0901	46	47.52	54.61	50.96	49.2	49.41

## Sheet: 5D-Entrances per Min
	5D
		# Entrances per min
			Cre+															Cre-
			Mouse 1	Mouse 2	Mouse 3	Mouse 4	Mouse 5	Mouse 6	Mouse 7	Mouse 8	Mouse 9	Mouse 10	Mouse 11	Mouse 12	Mouse 13	Mouse 14		Mouse 1	Mouse 2	Mouse 3	Mouse 4	Mouse 5	Mouse 6	Mouse 7	Mouse 8	Mouse 9	Mouse 10	Mouse 11	Mouse 12
		Start-1:00	2	2	1	4	2	4	1	1	2	3	3	1	1	1		2	1	2	3	5	2	1	2	1	2	4	4
		1:00-2:00	1	2	2	6	2	3	1	1	2	0	0	0	0	3		1	3	2	3	3	2	1	3	2	2	1	4
		2:00-3:00	2	1	1	5	3	2	1	2	2	0	2	2	1	2		0	1	2	2	2	1	1	4	1	4	2	2
		3:00-4:00	4	2	1	6	3	2	3	2	3	0	3	2	0	3		2	1	4	1	2	2	1	4		5	2	2
		4:00-5:00	4	3	3	7	5	5	2	1	2	1	5	2	1	3		3	2	5	2	4	1	2	2	4	2	1	4
		5:00-6:00	0	1	3	7	2	1	3	3	3	0	0	0	2	4		1	6	3	1	2	2	3	2	2	2	1	2
		6:00-7:00	2	2	3	7	2	3	4	3	2	0	4	2	0	1		4	2	3	2	3	1	2	1	3		1	1
		7:00-8:00	4	4	5	4	1	4	1	0	3	2	3	1	1	0		0	2	5	3	1	3	3	4	2	2	2	4
		8:00-9:00	3	1	3	3	2	2	1	2	2	0	4	1	1	3		2	2	2	1	4	3	1	5	2	2	3	3
		9:00-10:00	0	3	1	4	2	3	1	2	0	0	5	1	0	1		2	4	3	1	2	2	3	2	14	3	2	2
		10:00-11:00	4	1	1	5	2	2	7	2	3	1	3	0	1	3		2	2	2	0	2	2	1	2	3	2	0	4
		11:00-12:00	2	4	2	3	2	4	1	4	2	0	2	2	1	3		0	3	2	2	4	1	2	1	10	3	2	4
		12:00-13:00	5	3	0	5	3	2	0	2	3	0	5	0	0	1		1	1	4	4	2	4	2	1	1	0	3	4
		13:00-14:00	1	2	3	6	1	3	0	4	1	0	3	1	2	1		0	2	2	1	1	2	1	2	1	1	2	2
		14:00-15:00	4	2	0	2	1	2	0	3	2	0	3	2	0	2		2	1	3	1	3	1	2	3	1	4	1	2
		15:00-16:00	1	2	0	4	6	3	0	5	1	0	6	1	1	3		0	1	3	2	1	1	2	4	2	3	2	2
		16:00-17:00	2	2	5	4	4	1	0	4	1	1	0	1	1	2		1	2	4	2	2	0	2	1	5	3	1	2
		17:00-18:00	4	2	0	2	3	4	1	2	2	2	1	1	1	1		1	2	3	2	2	2	1	1	3	4	2	2
		18:00-19:00	3	1	0	5	2	4	0	2	1	0	3	2	1	3		3	4	8	3	1	1	2	6	1	2	3	1
		19:00-20:00	2	2	2	3	2	1	0	3	2	0	3	1	3	3		1	1	3	3	1	3	1	1	1	4	3	2
		20:00-21:00	4	3	2	5	4	3	1	4	2	0	2	2	2	1		0	3	1	2	2	2	1	3	2	3	1	1
		21:00-22:00	2	3	3	6	1	3	2	11	14	1	1	0	1	1		1	1	2	2	4	1	1	5	2	4	8	2
		22:00-23:00	3	5	1	4	1	0	4	4	1	0	0	2	1	2		2	0	0	1	2	1	3	1	4	2	2	3
		23:00-24:00	3	3	1	3	1	1	0	2	4	0	4	1	2	2		1	2	3	1	3	1	2	8	4	1	1	3
		24:00-25:00	5	5	2	5	2	4	1	10	6	2	5	3	2	3		0	1	3	2	2	1	5	1	10	1	1	2
		25:00-26:00	0	2	1	2	0	4	1	2	10	0	4	3	1	2		2	2	2	4	2	2	5	2	3	2	2	2
		26:00-27:00	5	1	1	3	1	3	1	3	1	0	5	1	0	0		2	3	2	2	2	1	2	4	4	1	3	2
		27:00-28:00	2	1	0	1	2	4	1	4	5	0	7	1	2	2		1	2	2	6	2	1	2	2	1	2	2	3
		28:00-29:00	6	3	1	2	1	3	0	4	3	0	4	2	2	3		4	0	2	1	1	2	2	4	2	4	1	5
		29:00-30:00	3	2	2	4	0	4	1	2	0	0	2	2	0	2		0	4	6	1	2	2	3	2	1	1	0	2

## Sheet: 5E-Min Time spent on Stim Side
	5E
		Time Spent on Stim side per Min
			Cre+															Cre-
			Mouse 1	Mouse 2	Mouse 3	Mouse 4	Mouse 5	Mouse 6	Mouse 7	Mouse 8	Mouse 9	Mouse 10	Mouse 11	Mouse 12	Mouse 13	Mouse 14		Mouse 1	Mouse 2	Mouse 3	Mouse 4	Mouse 5	Mouse 6	Mouse 7	Mouse 8	Mouse 9	Mouse 10	Mouse 11	Mouse 12	Mouse 13
		Start-1:00	2.16884	7.40741	2.3023	22.4958	20.9543	5.34535	0.633967	0.767434	3.63697	6.43977	3.93727	1.2012	1.66833	0.800801		6.67334	8.94228	8.94228	31.7651	36.7768	28.8288	26.9269	23.29	39.306	40.5739	32.8395	33.2733	48.1548
		1:00-2:00	1.1011	9.87654	1.86853	23.2633	16.016	4.59793	0.600601	0.734067	3.53687	0				2.83617		5.97264	24.5379	24.5379	26.373	29.2226	34.5812	46.6934	9.50951	31.5315	22.3557	47.7411	6.70003	40.1802
		2:00-3:00	1.66833	5.33867	1.93527	16.7568	15.015	2.06873	0.400401	1.1011	4.03737	0	2.76944	1.03437	2.43577	1.66833			15.0017	15.0017	41.8952	15.9693	29.0157	19.2392	26.6934	36.2029	20.0534	33.0531	31.685	33.8405
		3:00-4:00	1.86853	8.40174	1.53487	26.8669	17.978	4.73807	1.63497	1.23457	6.30631	0	5.10511	1.03437		2.86954		14.2476	19.5863	19.5863	21.1812	39.0858	39.7064	39.4394	15.1418	36.3297	20.7808	51.7584	33.1064	47.8212
		4:00-5:00	3.4034	10.4838	5.97264	25.2986	15.5222	5.27194	3.7037	0.700701	1.6016	1.96863	4.13747	1.2012	2.63597	5.43877		16.4498	32.0988	32.0988	47.5876	38.8388	27.3273	14.5479	26.4665	54.995	10.0167	23.8639	28.1348	41.8485
		5:00-6:00		9.14248	3.71038	20.4538	15.1485	1.66833	3.37004	1.66833	3.43677	0	0	0	3.93727	3.61028		1.46814	20.2269	20.2269	36.1762	47.2206	40.714	44.0107	41.7084	43.8438	40.8809	28.8956	14.8549	23.7638
		6:00-7:00	3.53687	9.90991	2.89623	26.2729	12.3457	3.51685	3.003	2.4024	1.93527	0	4.1041	1.1011	0	0.293626		16.1828	43.617	43.617	27.8545	14.975	24.698	32.646	12.5926	22.289	24.4311	0	26.3197	9.2359
		7:00-8:00	2.76944	8.67534	5.17184	13.8205	20.8208	6.89356	0.7007		2.96964	7.17384	2.36904	0.734067	2.76944	0			48.2349	48.2349	29.7631	36.2362	59.1458	31.0043	32.3524	31.2312	42.4291	18.1715	18.3383	41.6617
		8:00-9:00	5.37204	6.27294	3.43677	11.1845	19.019	1.8018	0.734067	1.26793	2.53587	0	4.70471	0.633968	2.86954	6.33967		1.06773	38.7321	38.7321	16.343	29.0891	23.9506	34.7147	28.7621	8.8355	13.3133	58.672	42.983	33.5802
		9:00-10:00		9.17584	1.03437	14.0541	13.2799	1.001	0.767434	1.16784	0	0	4.30431	0.600601	0	0.734067		4.50451	36.9436	36.9436	30.5038	42.5826	30.704	8.97564	40.4404	52.993	30.1635	53.8205	23.8305	26.026
		10:00-11:00	4.57791	5.03837	0.967635	26.5666	14.5479	1.67501	0.800802	1.23457	3.93727	1.93527	2.8028	0	3.003	3.23657		3.23657	40.1468	40.1468	26.293		24.4912	32.4324	24.5245	26.1595	29.7631	29.1692	0	26.8669
		11:00-12:00	1.86186	9.20921	2.13547	17.5242	11.2246	3.39673	0.533867	2.002	2.63597	0	1.36803	1.26794	2.76944	3.93727			21.4681	21.4681	45.4588	22.4224	40.5205	14.5279	30.7441	31.3647	2.53587	30.4238	8.92226	42.983
		12:00-13:00	3.47014	10.0434		22.8762	15.3353	2.06873	0	1.06773	3.3033	0	4.13747	0	0	0.934267		2.3023	8.69536	8.69536	28.0147	49.0691	37.5108	56.6633	29.1825	23.3901	46.1795	0	56.6099	54.8282
		13:00-14:00	1.33467	10.2436	2.16884	27.8612	7.07374	3.47014	0	2.5025	0.033367	0	2.86954	0.600601	2.96964	0.800801			24.3911	24.3911	21.2212	60	60	52.6994	35.4688	38.5986	20.654	46.5399	12.706	42.1221
		14:00-15:00	3.9039	7.34067		14.0807	16.016	3.2032	0	1.63497	3.53687	0	2.4024	1.4014	0	1.7017		3.003	7.87454	7.87454	45.1785	60	36.1762	29.3293	42.3423	23.3634	26.7935	53.8272	28.0347	41.8085
		15:00-16:00	1.2012	7.17384		30.8976	17.3907	4.27094	0	4.93827	0.734068	0	1.9019	0.567234	1.3013	3.1031			11.7784	11.7784	21.9953	20.2269	60	7.14047	23.5235	36.2362	41.6149	22.329	44.0841	14.381
		16:00-17:00	1.93527	4.3043	2.8028	20.3203	19.96	1.26794	0	2.23557	0.900901	2.83617	0	0.500501	1.73507	2.03537		3.53687	26.1061	26.1061	19.7598	48.2549	32.1722	0	50.4171	1.78178	42.0821	12.686	59.5195	32.7127
		17:00-18:00	2.03537	8.97564		6.77344	16.8368	5.6056	2.002	1.56823	1.3013	1.6016	1.001	0.667334	2.9029	0.900901		1.3013	12.5526	12.5526	35.5222	53.0597	19.3727	44.965	2.65599	18.6386	41.4615	38.2449	50.6173	28.0147
		18:00-19:00	1.76844	7.47414		33.3667	15.4755	3.6036	0	1.13447	1.46814	0	2.83617	1.33467	0.867534	2.33567		4.4044	37.1838	37.1838	27.4875	35.976	30.8242	20.5672	59.1325	30.624	59.7531	39.1525	36.8635	33.4001
		19:00-20:00	3.43677	4.2042	2.5025	20.2536	18.8922	1.2012	0	1.3013	4.4044	0	2.63597	0.6006	6.57324	7.30731		1.36803	15.382	15.382	34.0407	38.8455	38.2449	19.1191	29.97	60	60	7.57424	33.5402	38.1715
		20:00-21:00	5.31198	12.7127	2.6026	35.1084	14.6813	3.67034	0.567234	2.2022	4.33767	0	3.37004	1.06773	1.87521	0.734067			37.2706	37.2706	28.9623	47.2472	19.2926	38.7454	7.74107	51.5249	48.2549	31.8051	0.073408	26.8669
		21:00-22:00	2.39573	5.47214	1.63497	19.4127	6.07274	3.8038	0.433767	3.03637	2.76944	0.734068	0.967634	0	0.694026	0.767434		4.9049	1.5015	1.5015	31.6316	40.1201	39.5128	9.90323	6.28629	24.6847	35.8759	29.703	54.6947	46.6066
		22:00-23:00	1.86853	14.014	1.06773	17.2039	25.0918		0.633968	0.767433	1.6016	0	0	1.13447	0.633967	1.96863		7.40741				22.8762	34.7748	35.2886	22.5959	21.5082	41.6283	42.0954	4.99166	35.5222
		23:00-24:00	3.43677	7.34067	3.2032	13.1598	4.4044	1.33467	0	1.2012	1.83517	0	5.47214	0.600601	2.26226	2.3023		2.06873	37.4975	37.4975	42.4024	16.5766	40.1134	58.305	40.5472	48.1548	33.4601	1.06106	33.0597	45.986
		24:00-25:00	4.13747	7.20721	2.9029	23.9239	14.8815	4.27094	0.834167	2.13547	2.33567	3.26994	6.63997	1.96864	2.70937	10.1101			56.7634	56.7634	30.9376	45.986	17.9913	6.97364	45.1518	38.0781	35.4421	60	34.9416	34.9082
		25:00-26:00		13.013	0.967635	18.8522		3.13647	0.667334	1.03437	3.57024	0	6.20621	1.76844	0.967634	1.36803		10.6106	13.1532	13.1532	51.5582	37.2039	17.1905	34.3677	25.699	11.7784	3.47014	58.365	43.8172	25.2986
		26:00-27:00	4.47114	3.47014	0.900901	13.8805	23.29	7.54087	0.700701	1.16784	2.03537	0	7.00701	0.567234	0	0		1.76844	21.4615	21.4615	19.8465	10.0567	24.3644	9.92326	37.2639	43.5102	14.2609	29.5562	45.8058	43.2032
		27:00-28:00	1.3013	4.57124		7.47414	6.94027	4.33767	0.667334	1.93527	0.567232	0	4.87154	0.533868	2.86954	1.93527		11.2112	54.4077	54.4077	15.9359	32.2389	38.8455	60	32.0854	29.6497	34.1875	24.4244	41.4281	28.4484
		28:00-29:00	5.37204	7.54087	1.46814	12.1455	3.33667	6.94027	0	5.37204	3.89723	0	3.9039	1.26794	3.13647	3.6036		8.14147			42.3156	44.5913	60	45.1251	36.1495	8.78879	38.2316	22.983	57.7711	22.1955
		29:00-30:00	2.06873	5.87254	3.53687	28.4952		3.93727	0.567234	1.66833	0	0	1.66833	1.26793	0	2.4024			22.3891	22.3891	19.2926	33.033	57.1972	17.017	22.1555	37.8045	60	0.040038	0	42.1488

## Sheet: 5F-Time Spent Stim Side - Dark
	5F
		% on Stim Dark Side
			Cre+														Cre-
			Mouse 1	Mouse 2	Mouse 3	Mouse 4	Mouse 5	Mouse 6	Mouse 7	Mouse 8	Mouse 9	Mouse 10	Mouse 11	Mouse 12	Mouse 13		Mouse 1	Mouse 2	Mouse 3	Mouse 4	Mouse 5	Mouse 6	Mouse 7	Mouse 8	Mouse 9	Mouse 10	Mouse 11	Mouse 12
		Baseline	59.94	65.43	56.18	64.87	53.65	66.72	58.08	72.34	62.51	23.23	48.05	54.2	63.72		61.95	58.13	62.41	61.88	71.92	73.05	74.04	65.55	66.54	65.97	57.84	36.12
		1 Hz	53.17	24.63	39.8	73.19	72.71	37.74	35.81	18.99	13.68	41.35	51.47	64.14	35.77		71.6	51.68	68.42	62.63	76.73	73.24	73.53	65.9	68.64	55.1	74.14	59.49
		5 Hz	34.67	4.69	21.43	64.55	62.63	16.99	15.18	6.93	6.74	15.59	6.79	5.83	8.05		62	64.13	62.61	61.27	64.36	74.31	70.97	55.44	62.21	66.49	62.68	64.75
		10 Hz	43.91	5.96	12.73	30.5	66.72	8.94	3.17	2.32	5.06	4.94	1.13	1.47	3.2		57.44	56.55	59.61	56.86	62.94	69.29	70.14	64.47	67.43	71.86	68.59	72.15
		20 Hz	37.68	1.55	12.85	20.91	61.67	2.57	0.46	0.53	0.85	5.51	0.67	1.4	1.98		60.6	57.45	67.1	74.09	58.18	73.65	69.83	57.88	70.9	64.56	55.83	54.1

## Sheet: 5H-Center vs perimeter OFT
	5H
		Center vs Perimeter in Open Field Test
			Cre+																			Cre-
			Mouse 1	Mouse 2	Mouse 3	Mouse 4	Mouse 5	Mouse 6	Mouse 7	Mouse 8	Mouse 9	Mouse 10	Mouse 11	Mouse 12	Mouse 13	Mouse 14	Mouse 15	Mouse 16	Mouse 17	Mouse 18		Mouse 1	Mouse 2	Mouse 3	Mouse 4	Mouse 5	Mouse 6	Mouse 7	Mouse 8	Mouse 9	Mouse 10	Mouse 11	Mouse 12	Mouse 13	Mouse 14	Mouse 15	Mouse 16	Mouse 17	Mouse 18	Mouse 19	Mouse 20
		Center	525.893	214.581	116.984	116.95	90.255	346.513	569.703	480.647	98.3984	452.286	157.724	286.987	38.6386	363.065	265.575	467.302	271.066	92.3075		522.923	508.508	465.465	270.804	349.349	333.333	368.635	471.405	210.844	181.882	272.906	210.844	181.882	272.906	578.354	227.636	389.646	253.529	308.814	477.947
		Perimeter	733.867	1041.51	1142.65	1139.37	1167.74	855.927	652.687	678.443	1161.56	803.334	1102.21	972.403	1189.45	816.005	921.035	724.798	926.234	1106.82		737.137	751.552	794.425	980.246	900.371	903.267	888.055	647.715	1039.41	1060.53	981.344	1039.41	1060.53	981.344	604.646	948.004	760.734	926.141	882.186	716.383

## Sheet: 5I-OFT Total Distance
	5I
		Total Distance
			Cre+																			Cre-
			Mouse 1	Mouse 2	Mouse 3	Mouse 4	Mouse 5	Mouse 6	Mouse 7	Mouse 8	Mouse 9	Mouse 10	Mouse 11	Mouse 12	Mouse 13	Mouse 14	Mouse 15	Mouse 16	Mouse 17	Mouse 18		Mouse 1	Mouse 2	Mouse 3	Mouse 4	Mouse 5	Mouse 6	Mouse 7	Mouse 8	Mouse 9	Mouse 10	Mouse 11	Mouse 12	Mouse 13	Mouse 14	Mouse 15	Mouse 16	Mouse 17
		Total distance (cm)	19308.2	30672	35672.4	35051.6	16810.2	9167.51	25039	16788.4	23178.7	26587.2	24594.2	41389.6	25067.1	9291.28	10932.2	26009.6	19007.1	4432.68		17304.2	20436.9	15800.3	6034.94	8368.24	10452.8	8078.29	7449.06	6240.83	5531.5	7745.57	8156.22	7261.81	8759	6517.66	6788.08	8875.65
		Total Distance (m)	19.3082	30.672	35.6724	35.0516	16.8102	9.16751	25.039	16.7884	23.1787	26.5872	24.5942	41.3896	25.0671	9.29128	10.9322	26.0096	19.0071	4.43268		17.3042	20.4369	15.8003	6.03494	8.36824	10.4528	8.07829	7.44906	6.24083	5.5315	7.74557	8.15622	7.26181	8.759	6.51766	6.78808	8.87565

## Sheet: 5K-% Time Spent on D or L
	5K
		% Time Spent on Dark or light side
			Cre+									Cre-
			Mouse 1	Mouse 2	Mouse 3	Mouse 4	Mouse 5	Mouse 6	Mouse 7	Mouse 8		Mouse 1	Mouse 2	Mouse 3	Mouse 4	Mouse 5	Mouse 6	Mouse 7	Mouse 8	Mouse 9
		Dark	60.72	66.9	78.81	58.25	74.98	78.84	63.29	63.94		58.69	64.38	58.77	67.42	78.48	69.36	70.92	71.33	60.98
		Light	39.28	33.1	20.6	41.16	24.58	20.99	36.21	35.7		41.31	35.62	41.23	31.86	21.22	30.44	28.83	28.39	38.84

## Sheet: 5L-RTTP Total Distance
	5L
		% Total Distance
			Cre+									Cre-
			Mouse 1	Mouse 2	Mouse 3	Mouse 4	Mouse 5	Mouse 6	Mouse 7	Mouse 8		Mouse 1	Mouse 2	Mouse 3	Mouse 4	Mouse 5	Mouse 6	Mouse 7	Mouse 8	Mouse 9
		10Hz	14093.9	7154.55	20862.9	26982.6	23945.1	7899.74	8647.99	10204.9		7414.5	5837.79	3486.8	4861.77	4786.67	5458.85	5023.53	5701.46	8026.55
