# Supplementary material for: Glutamatergic supramammillary nucleus neurons respond to threatening stressors and promote active coping
Source: eLife. 2024 Jun 3;12:RP90972. doi: 10.7554/eLife.90972 (PMC11147510; doi:10.7554/eLife.90972)
Supplement: Figure 6—figure supplement 1—source data 1. [file elife-90972-fig6-figsupp1-data1.xlsx]

## Sheet: 6-S1A-Cre+ Active vs Inactive
	Figure 6-S1A	Cre+ Active vs Inactive Nose Pokes
			Active Port												Inactive Port
			Mouse 1	Mouse 2	Mouse 3	Mouse 4	Mouse 5	Mouse 6	Mouse 7	Mouse 8	Mouse 9	Mouse 10	Mouse 11		Mouse 1	Mouse 2	Mouse 3	Mouse 4	Mouse 5	Mouse 6	Mouse 7	Mouse 8	Mouse 9	Mouse 10	Mouse 11
		Day1	165	154	160	63	317	271	76	11	143	103	21		11	5	12	8	5	4	6	3	4	1	2
		Day 2	113	265	85	141	411	139	101	49	76	221	141		7	11	6	8	1	2	4	0	5	1	10
		Day 3	85	250	51	107	241	93	85	101	138	243	76		4	3	6	9	1	10	3	0	3	5	3
		Day 4	71	57	35	41	132	84	69	76	285	244	53		2	2	3	9	0	0	2	1	1	2	1

## Sheet: 6-S1B-Cre- Active vs Inactive
	Figure 6-S1B	Cre- Active vs Inactive Nose Pokes
			Active Port												Inactive Port
			Mouse 1	Mouse 2	Mouse 3	Mouse 4	Mouse 5	Mouse 6	Mouse 7	Mouse 8	Mouse 9	Mouse 10	Mouse 11		Mouse 1	Mouse 2	Mouse 3	Mouse 4	Mouse 5	Mouse 6	Mouse 7	Mouse 8	Mouse 9	Mouse 10	Mouse 11
		Day1	8	8	5	6	3	5	3	5	3	3	9		5	6	8	4	3	4	4	3	0	4	2
		Day 2	8	2	3	4	1	13	2	4	1	1	3		5	0	5	2	0	9	1	3	0	1	3
		Day 3	5	1	4	4	0	0	1	1	1	2	0		9	3	1	3	0	0	0	3	2	0	0
		Day 4	2	1	2	1	0	0	0	0	1	0	1		3	0	1	1	0	3	1	0	3	0	3
