# Supplementary material for: Glutamatergic supramammillary nucleus neurons respond to threatening stressors and promote active coping
Source: eLife. 2024 Jun 3;12:RP90972. doi: 10.7554/eLife.90972 (PMC11147510; doi:10.7554/eLife.90972)
Supplement: Figure 6—source data 1. [file elife-90972-fig6-data1.xlsx]

## Sheet: 6C-# of Pauses
	Figure 6C	# of Pauses
			Cre+												Cre-
			Mouse 1	Mouse 2	Mouse 3	Mouse 4	Mouse 5	Mouse 6	Mouse 7	Mouse 8	Mouse 9	Mouse 10	Mouse 11		Mouse 1	Mouse 2	Mouse 3	Mouse 4	Mouse 5	Mouse 6	Mouse 7	Mouse 8	Mouse 9	Mouse 10	Mouse 11
		Day1	36	21	27	19	39	39	34	11	26	35	6		6	8	5	5	3	4	3	5	3	2	7
		Day 2	35	40	38	33	49	51	50	31	29	44	41		8	2	3	4	1	12	2	3	1	1	2
		Day 3	39	50	37	31	52	49	51	46	47	51	51		3	1	3	4	0	0	1	1	1	1	0
		Day 4	46	42	15	23	54	54	54	50	50	53	50		2	0	2	1	0	0	0	0	1	0	1

## Sheet: 6D-# Active Port Activations
	6D	# Active Port Activations
			Cre+												Cre-
			Mouse 1	Mouse 2	Mouse 3	Mouse 4	Mouse 5	Mouse 6	Mouse 7	Mouse 8	Mouse 9	Mouse 10	Mouse 11		Mouse 1	Mouse 2	Mouse 3	Mouse 4	Mouse 5	Mouse 6	Mouse 7	Mouse 8	Mouse 9	Mouse 10	Mouse 11
		Day1	165	154	160	63	317	271	76	11	143	103	21		8	8	5	6	3	5	3	5	3	3	9
		Day 2	113	265	85	141	411	139	101	49	76	221	141		8	2	3	4	1	13	2	4	1	1	3
		Day 3	85	250	51	107	241	93	85	101	138	243	76		5	1	4	4	0	0	1	1	1	2	0
		Day 4	71	57	35	41	132	84	69	76	285	244	53		2	1	2	1	0	0	0	0	1	0	1

## Sheet: 6E-1st Active Nose poke
	6E	1st Active Nose poke
			Cre+												Cre-
			Mouse 1	Mouse 2	Mouse 3	Mouse 4	Mouse 5	Mouse 6	Mouse 7	Mouse 8	Mouse 9	Mouse 10	Mouse 11		Mouse 1	Mouse 2	Mouse 3	Mouse 4	Mouse 5	Mouse 6	Mouse 7	Mouse 8	Mouse 9	Mouse 10	Mouse 11
		Day1	79.9	84.75	9.9	58.3	35.1	25.55	2.1	14.8	152.95	48.85	45.8		58.95	45.25	68.45	138.95	80.05	56.45	122.65	115.75	140.05	20.55	148.85
		Day 2	15	19.35	8.95	3.5	2.8	2.95	2.6	18.75	9.55	2.85	31.55		14.1	176.15	130.5	113.25	443.95	37.8	194.55	38.6	483.3	218.5	17.15
		Day 3	3.55	2.4	4.25	4.1	3.7	5.5	1.9	15.55	1.5	8.1	1.9		203.1	159.2	38.9	115.7	N/A	N/A	274.1	182.75	24.15	303.5	N/A
		Day 4	2.9	5.35	28	12.6	1.7	2.5	1.05	2.8	1.2	3.55	1.1		80	70.8	216.15	426.65	N/A	N/A	N/A	N/A	58.55	N/A	426.05

## Sheet: 6F-PR #Activations and Rewards
	6F	Progressive Ratio # of Activations and Rewards								# of Activations
			Cre+												Cre-
			Mouse 1	Mouse 2	Mouse 3	Mouse 4	Mouse 5	Mouse 6	Mouse 7	Mouse 8	Mouse 9	Mouse 10	Mouse 11		Mouse 1	Mouse 2	Mouse 3	Mouse 4	Mouse 5	Mouse 6	Mouse 7	Mouse 8	Mouse 9	Mouse 10	Mouse 11
		Active nose poke	215	231	214	153	114	203	190	127	263	218	130		2	3	11	0	3	0	1	3	1	0	2
		Inactive nose poke	7	10	23	12	6	22	14	39	10	2	10		3	2	6	0	4	0	1	2	3	0	4
										# of Rewards
			Cre+												Cre-
			Mouse 1	Mouse 2	Mouse 3	Mouse 4	Mouse 5	Mouse 6	Mouse 7	Mouse 8	Mouse 9	Mouse 10	Mouse 11		Mouse 1	Mouse 2	Mouse 3	Mouse 4	Mouse 5	Mouse 6	Mouse 7	Mouse 8	Mouse 9	Mouse 10	Mouse 11
		Rewards	10	11	11	9	8	11	11	9	12	11	9		1	2	3	0	2	0	1	2	1	0	1

## Sheet: 6G-PR # of Pokes
	6G	PR # of Pokes
			Mouse 1		Mouse 2		Mouse 3		Mouse 4		Mouse 5		Mouse 6		Mouse 7		Mpuse 8
		Time(min)	Time of poke	Poke number	Time of poke	Poke number	Time of poke	Poke number	Time of poke	Poke number	Time of poke	Poke number	Time of poke	Poke number	Time of poke	Poke number	Time of poke	Poke number
			1.65	1	0.75	1	2.9	1	2.55	1	1.95	1	0.0416667	1	5.8	1	1.2	1
			12.95	2	11.5	2	14.55	2	14.2	2	2.2	2	11.95	2	23.7	2	12.2	2
			13.8	3	11.85	3	20	3	14.75	3	2.45	3	12.05	3	30.55	3	12.7	3
			14	4	23.35	4	20.15	4	15.05	4	13.15	4	17.7	4	30.8	4	12.95	4
			14.25	5	23.7	5	34.75	5	15.15	5	13.45	5	17.85	5	31.45	5	24.05	5
			14.45	6	24.15	6	34.95	6	26.2	6	13.5	6	19.4	6	53.05	6	25.5	6
			24.6	7	24.4	7	35	7	28.9	7	13.75	7	25.05	7	53.35	7	25.7	7
			25.05	8	35.15	8	41.15	8	36.05	8	25.1	8	25.2	8	54.3	8	25.8	8
			28.35	9	35.6	9	41.45	9	36.25	9	25.15	9	25.35	9	54.75	9	36.9	9
			31.6	10	36.35	10	41.65	10	36.4	10	25.2	10	25.95	10	77.55	10	37.1	10
			42.7	11	36.55	11	41.9	11	36.6	11	25.4	11	36.6	11	90.35	11	37.5	11
			43.35	12	36.6	12	52.25	12	36.7	12	36.2	12	36.85	12	90.6	12	37.7	12
			46.1	13	36.95	13	55.55	13	51.95	13	36.4	13	36.85	13	90.95	13	43.9	13
			46.85	14	38	14	64.25	14	52.55	14	37.35	14	36.9	14	122.35	14	44.15	14
			52.2	15	38.45	15	65.25	15	52.8	15	37.6	15	37.75	15	122.7	15	44.3	15
			52.95	16	49.45	16	71.6	16	52.85	16	37.75	16	37.85	16	123.55	16	56.5	16
			53.2	17	52.35	17	75.9	17	58.75	17	37.8	17	38.1	17	124.35	17	58.4	17
			64.2	18	53	18	80.65	18	65.65	18	39.4	18	51.25	18	124.65	18	58.75	18
			65.15	19	53.1	19	97.85	19	66.1	19	39.6	19	51.9	19	139.3	19	62.35	19
			65.3	20	53.2	20	105.2	20	66.35	20	39.8	20	52.05	20	140.3	20	62.65	20
			67.65	21	56.15	21	111.8	21	66.5	21	40.4	21	56.2	21	140.85	21	68.4	21
			74.5	22	56.45	22	116.2	22	67.7	22	40.7	22	56.4	22	141.15	22	68.9	22
			75.15	23	56.9	23	125.45	23	82	23	40.75	23	60.3	23	142.5	23	74.3	23
			75.35	24	60.25	24	128.7	24	86.05	24	51.75	24	60.35	24	147.05	24	74.45	24
			75.55	25	71.3	25	133.35	25	92.05	25	52.5	25	60.4	25	147.4	25	86.65	25
			75.6	26	71.3	26	137.6	26	95.85	26	53.05	26	60.5	26	147.7	26	88.65	26
			75.8	27	71.5	27	145.6	27	96.1	27	56.95	27	60.6	27	158.45	27	89.45	27
			75.95	28	73	28	162.3	28	102.25	28	57.25	28	60.75	28	159.05	28	92.7	28
			86.45	29	73.4	29	167.55	29	102.4	29	57.3	29	72.1	29	163.4	29	94	29
			92.6	30	73.7	30	172.35	30	105.7	30	58.7	30	72.75	30	183.9	30	98.65	30
			92.7	31	74.7	31	176.95	31	114.7	31	60.65	31	75.4	31	184.95	31	101.55	31
			101.05	32	74.95	32	189.6	32	114.95	32	60.95	32	75.6	32	195	32	109.95	32
			105.4	33	78.55	33	193.65	33	115.2	33	72.15	33	76.05	33	195	33	111.55	33
			105.55	34	79.25	34	208.9	34	117.95	34	72.4	34	78.5	34	195.25	34	115	34
			109.05	35	79.35	35	217.55	35	125.1	35	74.05	35	78.55	35	196	35	118.05	35
			112.15	36	79.55	36	221.15	36	130.1	36	75.2	36	81.7	36	196.6	36	120.45	36
			122.4	37	90.6	37	235.55	37	134.35	37	75.55	37	84.2	37	200.2	37	120.7	37
			125.8	38	91.25	38	257.65	38	139.4	38	82.25	38	84.3	38	200.6	38	120.8	38
			125.9	39	91.4	39	282.75	39	144.9	39	83.8	39	90.9	39	228.95	39	120.85	39
			130.1	40	91.5	40	315.45	40	152.85	40	84.05	40	91.05	40	253.2	40	120.95	40
			130.45	41	92.1	41	329	41	157.15	41	91.65	41	91.1	41	265.1	41	121.05	41
			130.55	42	94.6	42	339.65	42	160.1	42	91.95	42	103.1	42	265.7	42	121.15	42
			130.6	43	97.2	43	343.55	43	163.6	43	92.15	43	106.3	43	266.25	43	121.25	43
			130.65	44	100.9	44	363.15	44	168.25	44	97.4	44	108.8	44	266.75	44	121.4	44
			130.8	45	101.05	45	378.3	45	172.35	45	97.55	45	116.35	45	267.6	45	121.45	45
			131.1	46	104.5	46	382.65	46	175.85	46	108.25	46	116.55	46	267.85	46	121.9	46
			140.9	47	109.6	47	401.45	47	176.15	47	108.65	47	120	47	268.65	47	122.1	47
			141.6	48	110.9	48	411.5	48	176.55	48	109.85	48	120.15	48	280.25	48	125.25	48
			142.8	49	114.4	49	420	49	176.7	49	114.1	49	120.25	49	280.85	49	131.6	49
			144.85	50	114.55	50	427.4	50	176.85	50	116.35	50	124.75	50	282.7	50	132.5	50
			145.05	51	117.3	51	441.95	51	176.95	51	121.35	51	124.95	51	300.7	51	135.8	51
			148.4	52	117.6	52	469.55	52	179.45	52	121.55	52	129.35	52	300.8	52	139.4	52
			154.5	53	117.65	53	484.5	53	179.65	53	125.85	53	129.45	53	301.25	53	140.1	53
			154.95	54	128.1	54	504.4	54	180.45	54	131.1	54	129.6	54	303.75	54	142.4	54
			157.35	55	128.75	55	531.5	55	187.25	55	136.5	55	134.45	55	303.95	55	147.05	55
			161.6	56	130.6	56	536.05	56	196.7	56	140.55	56	142.6	56	304.3	56	151.2	56
			168	57	132.8	57	558.15	57	199.7	57	150.9	57	153.65	57	306.3	57	153.6	57
			178.35	58	136.65	58	576.95	58	202.95	58	157.35	58	158.2	58	307.3	58	158.25	58
			178.75	59	139.55	59	582.6	59	203.2	59	159.2	59	161.35	59	307.65	59	162.1	59
			186.45	60	140.45	60	588.2	60	203.3	60	159.85	60	161.55	60	367.6	60	168.6	60
			193	61	145	61	600.15	61	213.35	61	171.05	61	170.2	61	368	61	176.3	61
			193.35	62	147.75	62	604.7	62	220.7	62	174.8	62	172.2	62	368.05	62	180.4	62
			207.05	63	148	63	618.85	63	223.65	63	180.2	63	172.25	63	368.65	63	180.95	63
			207.15	64	150.45	64	628.5	64	224.3	64	186.25	64	172.3	64	369.5	64	181.3	64
			209.35	65	155.2	65	634.9	65	224.8	65	187.75	65	175.45	65	369.7	65	181.35	65
			209.45	66	158	66	642.65	66	227.8	66	188.7	66	178.5	66	370.35	66	181.8	66
			209.6	67	163.2	67	646.85	67	232.95	67	198.35	67	183.35	67	371.95	67	182.05	67
			211.9	68	165.6	68	652.45	68	235.6	68	214.3	68	184	68	383.15	68	182.15	68
			213.05	69	169.05	69	666.55	69	239.2	69	223.85	69	186.2	69	386	69	182.25	69
			213.5	70	173.7	70	683.3	70	239.55	70	232.8	70	200.5	70	386.4	70	182.5	70
			224.4	71	174.1	71	734.8	71	239.8	71	237.1	71	200.75	71	386.95	71	182.7	71
			227.15	72	176.55	72	786.35	72	239.85	72	256.15	72	217.75	72	412.2	72	183.2	72
			232.4	73	179.75	73	804.35	73	239.9	73	271.65	73	217.8	73	413.45	73	183.7	73
			244.15	74	190.85	74	847.55	74	240.95	74	290.15	74	217.95	74	413.8	74	184.15	74
			247.65	75	193.1	75	867.1	75	257.7	75	296.4	75	220.6	75	517.45	75	184.3	75
			251	76	195.95	76	873.5	76	268.9	76	302.85	76	281.85	76	517.5	76	191.95	76
			253.85	77	196.15	77	877.85	77	289.85	77	316.25	77	282	77	518.5	77	195.9	77
			256.95	78	200.85	78	884.1	78	290.1	78	333.6	78	295.1	78	519	78	196.65	78
			260.35	79	203.7	79	922.15	79	290.25	79	343.25	79	311.5	79	519.4	79	205.2	79
			267.7	80	209.25	80	924.2	80	290.35	80	346.5	80	311.6	80	588.95	80	205.55	80
			280.4	81	215.05	81	924.95	81	294.35	81	358.35	81	311.75	81	590.05	81	209.3	81
			297.55	82	215.25	82	945.05	82	302.6	82	374.2	82	328.55	82	590.4	82	213.3	82
			297.7	83	219	83	950.05	83	308.45	83	376.95	83	334.25	83	592.7	83	218.45	83
			298	84	219.15	84	973.55	84	308.7	84	381.7	84	334.3	84	656.9	84	222.6	84
			298.15	85	223.65	85	1005.8	85	314.95	85	392.05	85	343.7	85	660.2	85	227.65	85
			298.85	86	223.85	86	1028.6	86	315.3	86	399.7	86	347.4	86	731.55	86	237.7	86
			299.05	87	228.3	87	1043.7	87	321.75	87	414.6	87	347.5	87	746.55	87	241.25	87
			299.25	88	231.55	88	1052	88	336.75	88	434.1	88	457.05	88	746.75	88	245	88
			299.35	89	236.85	89	1088.2	89	346.85	89	440.15	89	464.2	89	746.9	89	249.7	89
			299.4	90	239.6	90	1093.55	90	375.45	90	454.55	90	474.7	90	747.55	90	258.05	90
			299.45	91	244.55	91	1128.6	91	375.65	91	456.25	91	498.1	91	748	91	261.7	91
			299.95	92	248.1	92	1144.25	92	391.7	92	462.55	92	552.5	92	748.25	92	264.35	92
			300.35	93	251.2	93	1181.3	93	397.15	93	474.3	93	552.6	93	748.35	93	264.95	93
			308.85	94	256.6	94	1187.15	94	399.5	94	532.65	94	616.2	94	748.8	94	278	94
			309.2	95	260.55	95	1214.25	95	399.75	95	537	95	616.45	95	750.85	95	280.35	95
			309.3	96	265.3	96	1231.85	96	400.15	96	538.75	96	703.15	96	751.4	96	294.3	96
			314.55	97	269.65	97	1236.05	97	400.25	97	550.45	97	703.2	97	751.6	97	306.15	97
			314.85	98	273.8	98	1242	98	400.45	98	581.1	98	703.3	98	751.9	98	307.15	98
			314.95	99	284.9	99	1258.8	99	401.1	99	595.2	99	751.7	99	752.55	99	319.15	99
			318.85	100	288.4	100	1301.85	100	411.9	100	620.9	100	751.85	100	752.6	100	341.05	100
			330.4	101	288.7	101	1318.8	101	412.2	101	637.95	101	762.2	101	752.8	101	356.85	101
			346.4	102	293	102	1324.5	102	424.65	102	688.9	102	891.8	102	752.9	102	377.05	102
			357.15	103	298.4	103	1332.35	103	424.95	103	695.25	103	978.9	103	772.95	103	379.55	103
			361.2	104	304	104	1337.25	104	440.6	104	746.75	104	985.85	104	773.6	104	395.35	104
			361.6	105	308.9	105	1351.85	105	440.9	105	770.35	105	994.3	105	775.2	105	400.3	105
			361.75	106	312.35	106	1357.75	106	440.95	106	784.8	106	1006.25	106	775.6	106	417.45	106
			361.8	107	316.1	107	1374.45	107	441.95	107	791.75	107	1011.75	107	809.95	107	427.3	107
			361.95	108	316.45	108	1379.85	108	456.45	108	796.25	108	1043.55	108	811	108	453.5	108
			375.35	109	320.05	109	1386.5	109	459.05	109	804.45	109	1129.7	109	811.4	109	478.75	109
			379.6	110	326.75	110	1416.9	110	459.4	110	821.7	110	1162.35	110	811.9	110	499.15	110
			383.2	111	331.35	111	1430.4	111	466.4	111	821.85	111	1176.95	111	813.7	111	526.05	111
			389.95	112	331.65	112	1435.85	112	478.55	112	838.1	112	1198.5	112	813.95	112	1101.85	112
			402.4	113	333.05	113	1449.95	113	481.4	113	840.95	113	1255.4	113	814	113	1180.6	113
			411.7	114	336.9	114	1471.15	114	481.65	114	842.5	114	1284.7	114	821.9	114	1342.5	114
			444.3	115	345.15	115	1477.9	115	494.35	115	848.1	115	1320.7	115	897.5	115
			476.6	116	351.3	116	1484.95	116	506.35	116	862.2	116	1320.8	116	898.9	116
			476.8	117	355.85	117	1491.2	117	515.3	117	866.15	117	1320.85	117	899.35	117
			493.4	118	364.55	118	1492.35	118	551.8	118	871.1	118	1355.75	118	899.4	118
			494.7	119	367.4	119	1526.2	119	613.4	119	876.3	119	1355.85	119	1047.75	119
			495.4	120	372	120	1554.3	120	613.6	120	881.8	120	1473.25	120	1049.65	120
			538.75	121	375.95	121	1561.05	121	632.25	121	894.9	121	1488.3	121	1050.05	121
			538.95	122	379.6	122	1592.85	122	649.25	122	914.7	122	1505.6	122	1051	122
			539.1	123	382.1	123	1599.8	123	668.75	123	915	123	1505.8	123	1051.35	123
			549.8	124	397.95	124	1605.9	124	693.5	124	919.05	124	1505.9	124	1087.6	124
			549.9	125	423.6	125	1672.2	125	693.8	125	923.95	125	1527.35	125	1088.95	125
			550.1	126	431.35	126	1706.1	126	693.9	126	928.7	126	1749.35	126	1248.85	126
			557.25	127	442.45	127	1734.3	127	694.15	127	941.9	127	1764.9	127	1250.45	127
			557.5	128	448.7	128			695.7	128	946.8	128	1764.95	128	1270.8	128
			581.7	129	477.25	129			703.55	129	958.85	129	1764.95	129	1271.65	129
			582	130	636.35	130			706.65	130	973.3	130	1765.05	130	1280.95	130
			593	131	647.4	131			711.85	131	979.6	131			1347.7	131
			598.45	132	652.45	132			715.4	132	985.6	132			1349.4	132
			608.45	133	660.15	133			715.75	133	999.85	133			1349.85	133
			612.8	134	662.9	134			719.2	134	1003.85	134			1433.85	134
			622.95	135	679.5	135			719.55	135	1010.1	135			1435.25	135
			640.95	136	716.25	136			732.7	136	1018.95	136			1436	136
			646.95	137	716.35	137			737.8	137	1025.5	137			1436.55	137
			743.35	138	727.9	138			747.3	138	1025.7	138			1439.3	138
			814.15	139	733.35	139			747.45	139	1038.95	139			1439.65	139
			827.7	140	744	140			747.6	140	1041.6	140			1440.1	140
			827.9	141	790.75	141			747.7	141	1048.1	141			1448.8	141
			828.1	142	794.5	142			750.7	142	1050	142			1498.2	142
			828.15	143	813.8	143			751.05	143	1054.15	143			1544.75	143
			828.3	144	836.15	144			755.2	144	1059.35	144			1547.7	144
			835.95	145	852.75	145			755.45	145	1063.85	145			1548.65	145
			862.35	146	860.3	146			758.95	146	1065.3	146			1549.35	146
			915.35	147	863.9	147			762.8	147	1070.9	147			1552.15	147
			1012.7	148	910.15	148			771.9	148	1082.75	148			1554.1	148
			1012.9	149	926.75	149			778.2	149	1083.05	149			1607	149
			1036.7	150	936.85	150			778.45	150	1088.75	150			1621.1	150
			1072.85	151	942.4	151			782.5	151	1095.25	151			1684.15	151
			1073.1	152	942.5	152			785.75	152	1101.55	152			1725	152
			1073.2	153	945.85	153			788.9	153	1121.45	153			1785.35	153
			1073.25	154	962.95	154			807.5	154	1125.25	154
			1073.6	155	982.1	155			835.15	155	1125.75	155
			1073.75	156	986.15	156			838.85	156	1147.95	156
			1074.25	157	1001.05	157			839.15	157	1152.45	157
			1074.75	158	1021.05	158			845.85	158	1159.65	158
			1075.05	159	1039.3	159			852.55	159	1159.75	159
			1075.2	160	1051.1	160			865.55	160	1177.2	160
			1087.95	161	1112.6	161			865.85	161	1183.35	161
			1088.1	162	1126.8	162			866	162	1190.75	162
			1090.75	163	1150.05	163			866.05	163	1196.8	163
			1116.85	164	1160.25	164			866.2	164	1202.55	164
			1117.05	165	1173.9	165			867.15	165	1208.6	165
			1132.5	166	1177.15	166			867.5	166	1222.3	166
			1141.35	167	1181.85	167			868	167	1229.2	167
			1156.45	168	1199.75	168			878.4	168	1231.8	168
			1156.7	169	1222.5	169			878.65	169	1236	169
			1186.1	170	1261.35	170			878.8	170	1242.35	170
			1189.75	171	1274.15	171			882.85	171	1257.45	171
			1207.7	172	1298.85	172			890.3	172	1281.7	172
			1212.75	173	1308.95	173			890.6	173	1289.85	173
			1218.2	174	1314.65	174			895.85	174	1297.05	174
			1267.45	175	1318.35	175			895.95	175	1309.25	175
			1269.7	176	1358.35	176			905.2	176	1314.25	176
			1287.25	177	1362.25	177			913.75	177	1335.75	177
			1290.65	178	1399.4	178			914.05	178	1355.3	178
			1299.5	179	1419.3	179			918.1	179	1355.55	179
			1308.65	180	1451.75	180			918.35	180	1355.9	180
			1311.25	181	1479.1	181			918.45	181	1376.9	181
			1569.4	182	1487.1	182			918.45	182	1382.5	182
			1573.35	183	1497.45	183			922.2	183	1390.3	183
			1587.5	184	1510.1	184			925.6	184	1400.35	184
			1605.5	185	1577.65	185			948.8	185	1400.5	185
			1637.25	186	1614.15	186			948.9	186	1408.1	186
			1637.5	187	1648.8	187			959	187	1415	187
			1653.9	188	1720.05	188			959.45	188	1420.85	188
			1670.65	189	1764.15	189			980.4	189	1433.9	189
			1674.85	190	1793.45	190			999.85	190	1438.05	190
			1688.05	191					1014.95	191	1464.8	191
			1688.15	192					1015.1	192	1469.45	192
			1688.2	193					1015.45	193	1470.9	193
			1701.55	194					1024.05	194	1470.95	194
			1730.25	195					1037.25	195	1490.15	195
			1746.9	196					1045.65	196	1494.55	196
			1755	197					1048.7	197	1509.85	197
			1791.65	198					1058.2	198	1517.95	198
			1799.3	199					1089.2	199	1531.9	199
			1799.45	200					1094.65	200	1536.25	200
			1799.65	201					1101.5	201	1542	201
			1799.7	202					1101.75	202	1542.05	202
			1799.75	203					1101.85	203	1562.55	203
									1102	204	1583.45	204
									1119.55	205	1601.9	205
									1154	206	1607.55	206
									1203.9	207	1620.8	207
									1204.1	208	1631.15	208
									1204.25	209	1635.7	209
									1204.4	210	1647.15	210
									1204.5	211	1655.95	211
									1204.6	212	1667.45	212
									1205.3	213	1672.25	213
									1229.55	214	1679.2	214
									1235.35	215	1703.65	215
									1249.6	216	1713.75	216
									1249.8	217	1740.2	217
									1252.75	218	1747.3	218
									1260.35	219
									1260.55	220
									1260.6	221
									1266.65	222
									1267.05	223
									1276.55	224
									1308.1	225
									1312.55	226
									1321.15	227
									1323.75	228
									1324.15	229
									1328.5	230
									1366.95	231
									1367.2	232
									1370.85	233
									1371.1	234
									1371.2	235
									1371.3	236
									1386.7	237
									1400.1	238
									1400.3	239
									1426.5	240
									1426.65	241
									1426.8	242
									1430	243
									1459.05	244
									1503.1	245
									1517.15	246
									1526.75	247
									1526.95	248
									1527.15	249
									1531.4	250
									1550.25	251
									1571.7	252
									1611	253
									1611.25	254
									1611.45	255
									1619	256
									1630.25	257
									1637.95	258
									1678.4	259
									1703.2	260
									1740.15	261
									1786.15	262
									1786.45	263

## Sheet: 6H-PR # of Rewards
	6H	PR # of Rewards
			Mouse 1		Mouse 2		Mouse 3		Mouse 4		Mouse 5		Mouse 6		Mouse 7		Mouse 8
			Time of reward	Reward number	Time of reward	Reward number	Time of reward	Reward number	Time of reward	Reward number	Time of reward	Reward number	Time of reward	Reward number	Time of reward	Reward number	Time of reward	Reward number
			1.65	1	0.75	1	2.9	1	0.125	1	0.0833333	1	0.75	1	0.25	1	1.2	1
			13.8	2	11.85	2	20	2	14.75	2	13.45	2	12.05	2	30.55	2	12.7	2
			31.6	3	24.4	3	41.15	3	36.25	3	25.4	3	25.95	3	54.75	3	25.8	3
			53.2	4	38	4	80.65	4	66.1	4	39.4	4	38.1	4	123.55	4	44.3	4
			75.6	5	60.25	5	145.6	5	114.7	5	60.95	5	60.5	5	158.45	5	74.45	5
			130.1	6	79.55	6	282.75	6	175.85	6	97.4	6	91.05	6	265.1	6	120.45	6
			193	7	117.3	7	504.4	7	239.2	7	159.85	7	142.6	7	368.05	7	180.95	7
			297.55	8	179.75	8	847.55	8	399.5	8	346.5	8	281.85	8	746.55	8	280.35	8
			493.4	9	273.8	9	1258.8	9	693.5	9	770.35	9	891.8	9	1250.45	9
			1073.1	10	636.35	10			865.55	10	1025.5	10
			1799.45	11	1261.35	11			1203.9	11	1355.3	11
									1786.45	12
