# Supplementary material for: Glutamatergic supramammillary nucleus neurons respond to threatening stressors and promote active coping
Source: eLife. 2024 Jun 3;12:RP90972. doi: 10.7554/eLife.90972 (PMC11147510; doi:10.7554/eLife.90972)
Supplement: Figure 7—source data 1. [file elife-90972-fig7-data1.xlsx]

## Sheet: Figure 7 A-E
	Figure 7 A-E. For each mouse, there are two worksheets (GCaMPs 470 and Isosbestic 415)

## Sheet: Mouse_1_415_Signal
FrameCounter	Timestamp	LedState	Stimulation	Output0	Output1	Input0	Input1	Region0G
7430	275.387	1	0	1	0	0	0	0.023321
7432	275.42	1	0	1	0	0	0	0.0233039
7434	275.454	1	0	1	0	0	0	0.0233011
7436	275.487	1	0	1	0	0	0	0.0232687
7438	275.52	1	0	1	0	0	0	0.0231648
7440	275.554	1	0	1	0	0	0	0.0231909
7442	275.587	1	0	1	0	0	0	0.0232034
7444	275.62	1	0	1	0	0	0	0.0230807
7446	275.654	1	0	1	0	0	0	0.0230932
7448	275.687	1	0	1	0	0	0	0.0232432
7450	275.72	1	0	1	0	0	0	0.0232312
7452	275.754	1	0	1	0	0	0	0.0233091
7454	275.787	1	0	1	0	0	0	0.0233323
7456	275.82	1	0	1	0	0	0	0.0232926
7458	275.854	1	0	1	0	0	0	0.023229
7460	275.887	1	0	1	0	0	0	0.0231949
7462	275.92	1	0	1	0	0	0	0.0233039
7464	275.954	1	0	1	0	0	0	0.0231784
7466	275.987	1	0	1	0	0	0	0.0230683
7468	276.02	1	0	1	0	0	0	0.0231006
7470	276.054	1	0	1	0	0	0	0.0231364
7472	276.087	1	0	1	0	0	0	0.0232364
7474	276.12	1	0	1	0	0	0	0.023183
7476	276.154	1	0	1	0	0	0	0.023221
7478	276.187	1	0	1	0	0	0	0.0233585
7480	276.22	1	0	1	0	0	0	0.0233437
7482	276.254	1	0	1	0	0	0	0.0232676
7484	276.287	1	0	1	0	0	0	0.0233744
7486	276.32	1	0	1	0	0	0	0.0234385
7488	276.354	1	0	1	0	0	0	0.0233375
7490	276.387	1	0	1	0	0	0	0.0232761
7492	276.42	1	0	1	0	0	0	0.0232335
7494	276.454	1	0	1	0	0	0	0.0231779
7496	276.487	1	0	1	0	0	0	0.0232528
7498	276.52	1	0	1	0	0	0	0.0232199
7500	276.554	1	0	1	0	0	0	0.0232971
7502	276.587	1	0	1	0	0	0	0.0233392
7504	276.62	1	0	1	0	0	0	0.0232926
7506	276.654	1	0	1	0	0	0	0.0232971
7508	276.687	1	0	1	0	0	0	0.0232403
7510	276.72	1	0	1	0	0	0	0.0232693
7512	276.754	1	0	1	0	0	0	0.0232858
7514	276.787	1	0	1	0	0	0	0.0232449
7516	276.82	1	0	1	0	0	0	0.0232511
7518	276.854	1	0	1	0	0	0	0.0232568
7520	276.887	1	0	1	0	0	0	0.02325
7522	276.92	1	0	1	0	0	0	0.0232284
7524	276.954	1	0	1	0	0	0	0.0233034
7526	276.987	1	0	1	0	0	0	0.0232937
7528	277.02	1	0	1	0	0	0	0.0232977
7530	277.054	1	0	1	0	0	0	0.0232631
7532	277.087	1	0	1	0	0	0	0.0232693
7534	277.12	1	0	1	0	0	0	0.0232432
7536	277.154	1	0	1	0	0	0	0.0232528
7538	277.187	1	0	1	0	0	0	0.0233022
7540	277.22	1	0	1	0	0	0	0.0233005
7542	277.254	1	0	1	0	0	0	0.0233204
7544	277.287	1	0	1	0	0	0	0.0232613
7546	277.32	1	0	1	0	0	0	0.0232562
7548	277.354	1	0	1	0	0	0	0.023321
7550	277.387	1	0	1	0	0	0	0.023392
7552	277.42	1	0	1	0	0	0	0.0233965
7554	277.454	1	0	1	0	0	0	0.0233812
7556	277.487	1	0	1	0	0	0	0.0233664
7558	277.52	1	0	1	0	0	0	0.0233704
7560	277.554	1	0	1	0	0	0	0.0232841
7562	277.587	1	0	1	0	0	0	0.0231574
7564	277.62	1	0	1	0	0	0	0.0230211
7566	277.654	1	0	1	0	0	0	0.0228303
7568	277.687	1	0	1	0	0	0	0.0228178
7570	277.72	1	0	1	0	0	0	0.0228399
7572	277.754	1	0	1	0	0	0	0.0228791
7574	277.787	1	0	1	0	0	0	0.0229087
7576	277.82	1	0	1	0	0	0	0.022778
7578	277.854	1	0	1	0	0	0	0.0226145
7580	277.887	1	0	1	0	0	0	0.0223578
7582	277.92	1	0	1	0	0	0	0.0220897
7584	277.954	1	0	1	0	0	0	0.0222033
7586	277.987	1	0	1	0	0	0	0.0221902
7588	278.02	1	0	1	0	0	0	0.0220318
7590	278.054	1	0	1	0	0	0	0.0222334
7592	278.087	1	0	1	0	0	0	0.0220897
7594	278.12	1	0	1	0	0	0	0.0221516
7596	278.154	1	0	1	0	0	0	0.0225174
7598	278.187	1	0	1	0	0	0	0.0225179
7600	278.22	1	0	1	0	0	0	0.0222828
7602	278.254	1	0	1	0	0	0	0.0222811
7604	278.287	1	0	1	0	0	0	0.0222107
7606	278.32	1	0	1	0	0	0	0.0220397
7608	278.354	1	0	1	0	0	0	0.0221312
7610	278.387	1	0	1	0	0	0	0.0221857
7612	278.42	1	0	1	0	0	0	0.0219812
7614	278.454	1	0	1	0	0	0	0.0218977
7616	278.487	1	0	1	0	0	0	0.022163
7618	278.52	1	0	1	0	0	0	0.0222686
7620	278.553	1	0	1	0	0	0	0.0222482
7622	278.587	1	0	1	0	0	0	0.0225355
7624	278.62	1	0	1	0	0	0	0.0226707
7626	278.653	1	0	1	0	0	0	0.0226503
7628	278.687	1	0	1	0	0	0	0.0228683
7630	278.72	1	0	1	0	0	0	0.0229575
7632	278.753	1	0	1	0	0	0	0.0226434
7634	278.787	1	0	1	0	0	0	0.0224946
7636	278.82	1	0	1	0	0	0	0.0223481
7638	278.853	1	0	1	0	0	0	0.0222419
7640	278.887	1	0	1	0	0	0	0.0223657
7642	278.92	1	0	1	0	0	0	0.0225906
7644	278.953	1	0	1	0	0	0	0.022556
7646	278.987	1	0	1	0	0	0	0.0222839
7648	279.02	1	0	1	0	0	0	0.0220874
7650	279.053	1	0	1	0	0	0	0.0221181
7652	279.087	1	0	1	0	0	0	0.0221096
7654	279.12	1	0	1	0	0	0	0.0221953
7656	279.153	1	0	1	0	0	0	0.0221465
7658	279.187	1	0	1	0	0	0	0.0221953
7660	279.22	1	0	1	0	0	0	0.0221476
7662	279.253	1	0	1	0	0	0	0.022159
7664	279.287	1	0	1	0	0	0	0.0224594
7666	279.32	1	0	1	0	0	0	0.0224112
7668	279.353	1	0	1	0	0	0	0.0224452
7670	279.387	1	0	1	0	0	0	0.0223101
7672	279.42	1	0	1	0	0	0	0.022293
7674	279.453	1	0	1	0	0	0	0.0221465
7676	279.487	1	0	1	0	0	0	0.0221647
7678	279.52	1	0	1	0	0	0	0.0222436
7680	279.553	1	0	1	0	0	0	0.0223299
7682	279.587	1	0	1	0	0	0	0.0223941
7684	279.62	1	0	1	0	0	0	0.0224259
7686	279.653	1	0	1	0	0	0	0.0225321
7688	279.687	1	0	1	0	0	0	0.0224804
7690	279.72	1	0	1	0	0	0	0.0225787
7692	279.753	1	0	1	0	0	0	0.0225304
7694	279.787	1	0	1	0	0	0	0.0226105
7696	279.82	1	0	1	0	0	0	0.0227076
7698	279.853	1	0	1	0	0	0	0.0225764
7700	279.887	1	0	1	0	0	0	0.0224628
7702	279.92	1	0	1	0	0	0	0.0223356
7704	279.953	1	0	1	0	0	0	0.0223634
7706	279.987	1	0	1	0	0	0	0.0223441
7708	280.02	1	0	1	0	0	0	0.0221317
7710	280.053	1	0	1	0	0	0	0.0222107
7712	280.087	1	0	1	0	0	0	0.0222351
7714	280.12	1	0	1	0	0	0	0.0224793
7716	280.153	1	0	1	0	0	0	0.0224924
7718	280.187	1	0	1	0	0	0	0.0224242
7720	280.22	1	0	1	0	0	0	0.0225412
7722	280.253	1	0	1	0	0	0	0.022456
7724	280.287	1	0	1	0	0	0	0.0224793
7726	280.32	1	0	1	0	0	0	0.0224231
7728	280.353	1	0	1	0	0	0	0.0224816
7730	280.387	1	0	1	0	0	0	0.022502
7732	280.42	1	0	1	0	0	0	0.0224935
7734	280.453	1	0	1	0	0	0	0.0223941
7736	280.487	1	0	1	0	0	0	0.0221317
7738	280.52	1	0	1	0	0	0	0.0220641
7740	280.553	1	0	1	0	0	0	0.0219506
7742	280.587	1	0	1	0	0	0	0.021904
7744	280.62	1	0	1	0	0	0	0.0219932
7746	280.653	1	0	1	0	0	0	0.0219222
7748	280.687	1	0	1	0	0	0	0.021875
7750	280.72	1	0	1	0	0	0	0.0217842
7752	280.753	1	0	1	0	0	0	0.0216666
7754	280.787	1	0	1	0	0	0	0.0216598
7756	280.82	1	0	1	0	0	0	0.02167
7758	280.853	1	0	1	0	0	0	0.0217183
7760	280.887	1	0	1	0	0	0	0.0216416
7762	280.92	1	0	1	0	0	0	0.0216723
7764	280.953	1	0	1	0	0	0	0.0217279
7766	280.987	1	0	1	0	0	0	0.0218693
7768	281.02	1	0	1	0	0	0	0.0218358
7770	281.053	1	0	1	0	0	0	0.0218478
7772	281.087	1	0	1	0	0	0	0.0219091
7774	281.12	1	0	1	0	0	0	0.0218603
7776	281.153	1	0	1	0	0	0	0.0218336
7778	281.187	1	0	1	0	0	0	0.02177
7780	281.22	1	0	1	0	0	0	0.0219278
7782	281.253	1	0	1	0	0	0	0.0220613
7784	281.287	1	0	1	0	0	0	0.0221067
7786	281.32	1	0	1	0	0	0	0.0220062
7788	281.353	1	0	1	0	0	0	0.0219341
7790	281.387	1	0	1	0	0	0	0.0219892
7792	281.42	1	0	1	0	0	0	0.022042
7794	281.453	1	0	1	0	0	0	0.0222073
7796	281.487	1	0	1	0	0	0	0.022063
7798	281.52	1	0	1	0	0	0	0.0220057
7800	281.553	1	0	1	0	0	0	0.0219727
7802	281.587	1	0	1	0	0	0	0.0220397
7804	281.62	1	0	1	0	0	0	0.0224895
7806	281.653	1	0	1	0	0	0	0.0222413
7808	281.687	1	0	1	0	0	0	0.0222232
7810	281.72	1	0	1	0	0	0	0.0222249
7812	281.753	1	0	1	0	0	0	0.0222788
7814	281.787	1	0	1	0	0	0	0.0224617
7816	281.82	1	0	1	0	0	0	0.0224163
7818	281.853	1	0	1	0	0	0	0.0223754
7820	281.887	1	0	1	0	0	0	0.0223907
7822	281.92	1	0	1	0	0	0	0.022255
7824	281.953	1	0	1	0	0	0	0.0223129
7826	281.987	1	0	1	0	0	0	0.0221664
7828	282.02	1	0	1	0	0	0	0.022063
7830	282.053	1	0	1	0	0	0	0.0222141
7832	282.087	1	0	1	0	0	0	0.02236
7834	282.12	1	0	1	0	0	0	0.0226224
7836	282.153	1	0	1	0	0	0	0.0227002
7838	282.187	1	0	1	0	0	0	0.022719
7840	282.22	1	0	1	0	0	0	0.0227712
7842	282.253	1	0	1	0	0	0	0.0226843
7844	282.287	1	0	1	0	0	0	0.0227008
7846	282.32	1	0	1	0	0	0	0.022665
7848	282.353	1	0	1	0	0	0	0.0227048
7850	282.387	1	0	1	0	0	0	0.0227383
7852	282.42	1	0	1	0	0	0	0.0225475
7854	282.453	1	0	1	0	0	0	0.022414
7856	282.487	1	0	1	0	0	0	0.0223061
7858	282.52	1	0	1	0	0	0	0.0222499
7860	282.553	1	0	1	0	0	0	0.0222095
7862	282.587	1	0	1	0	0	0	0.0222413
7864	282.62	1	0	1	0	0	0	0.0221993
7866	282.653	1	0	1	0	0	0	0.0219239
7868	282.687	1	0	1	0	0	0	0.0218824
7870	282.72	1	0	1	0	0	0	0.0220977
7872	282.753	1	0	1	0	0	0	0.0222413
7874	282.787	1	0	1	0	0	0	0.0220074
7876	282.82	1	0	1	0	0	0	0.0219733
7878	282.853	1	0	1	0	0	0	0.0218904
7880	282.887	1	0	1	0	0	0	0.0216371
7882	282.92	1	0	1	0	0	0	0.0218279
7884	282.953	1	0	1	0	0	0	0.0220499
7886	282.987	1	0	1	0	0	0	0.0220886
7888	283.02	1	0	1	0	0	0	0.0223697
7890	283.053	1	0	1	0	0	0	0.022322
7892	283.087	1	0	1	0	0	0	0.02241
7894	283.12	1	0	1	0	0	0	0.0222027
7896	283.153	1	0	1	0	0	0	0.0221868
7898	283.187	1	0	1	0	0	0	0.022113
7900	283.22	1	0	1	0	0	0	0.0220931
7902	283.253	1	0	1	0	0	0	0.0220193
7904	283.287	1	0	1	0	0	0	0.0220573
7906	283.32	1	0	1	0	0	0	0.0221028
7908	283.353	1	0	1	0	0	0	0.0221823
7910	283.387	1	0	1	0	0	0	0.0219858
7912	283.42	1	0	1	0	0	0	0.0219835
7914	283.453	1	0	1	0	0	0	0.0219335
7916	283.487	1	0	1	0	0	0	0.0218654
7918	283.52	1	0	1	0	0	0	0.0218324
7920	283.553	1	0	1	0	0	0	0.0219324
7922	283.587	1	0	1	0	0	0	0.0220551
7924	283.62	1	0	1	0	0	0	0.0218966
7926	283.653	1	0	1	0	0	0	0.0218228
7928	283.687	1	0	1	0	0	0	0.0219261
7930	283.72	1	0	1	0	0	0	0.0219875
7932	283.753	1	0	1	0	0	0	0.0217671
7934	283.787	1	0	1	0	0	0	0.0217745
7936	283.82	1	0	1	0	0	0	0.0218824
7938	283.853	1	0	1	0	0	0	0.022059
7940	283.887	1	0	1	0	0	0	0.02218
7942	283.92	1	0	1	0	0	0	0.0221016
7944	283.953	1	0	1	0	0	0	0.022305
7946	283.987	1	0	1	0	0	0	0.0224657
7948	284.02	1	0	1	0	0	0	0.0223862
7950	284.053	1	0	1	0	0	0	0.0222919
7952	284.087	1	0	1	0	0	0	0.0222254
7954	284.12	1	0	1	0	0	0	0.0220517
7956	284.153	1	0	1	0	0	0	0.0220079
7958	284.187	1	0	1	0	0	0	0.0219954
7960	284.22	1	0	1	0	0	0	0.022096
7962	284.253	1	0	1	0	0	0	0.0220034
7964	284.287	1	0	1	0	0	0	0.0221533
7966	284.32	1	0	1	0	0	0	0.0219829
7968	284.353	1	0	1	0	0	0	0.0220568
7970	284.387	1	0	1	0	0	0	0.0222357
7972	284.42	1	0	1	0	0	0	0.0223634
7974	284.453	1	0	1	0	0	0	0.0222521
7976	284.487	1	0	1	0	0	0	0.0221226
7978	284.52	1	0	1	0	0	0	0.0220835
7980	284.553	1	0	1	0	0	0	0.0219244
7982	284.587	1	0	1	0	0	0	0.0219738
7984	284.62	1	0	1	0	0	0	0.0219818
7986	284.653	1	0	1	0	0	0	0.0219824
7988	284.687	1	0	1	0	0	0	0.0219057
7990	284.72	1	0	1	0	0	0	0.0219381
7992	284.753	1	0	1	0	0	0	0.0219733
7994	284.787	1	0	1	0	0	0	0.0220454
7996	284.82	1	0	1	0	0	0	0.0220585
7998	284.853	1	0	1	0	0	0	0.0221442
8000	284.887	1	0	1	0	0	0	0.0221266
8002	284.92	1	0	1	0	0	0	0.022021
8004	284.953	1	0	1	0	0	0	0.022234
8006	284.987	1	0	1	0	0	0	0.0221647
8008	285.02	1	0	1	0	0	0	0.0220806
8010	285.053	1	0	1	0	0	0	0.0219125
8012	285.087	1	0	1	0	0	0	0.0218506
8014	285.12	1	0	1	0	0	0	0.0218983
8016	285.153	1	0	1	0	0	0	0.0220562
8018	285.187	1	0	1	0	0	0	0.0222107
8020	285.22	1	0	1	0	0	0	0.0220908
8022	285.253	1	0	1	0	0	0	0.0221522
8024	285.287	1	0	1	0	0	0	0.0221942
8026	285.32	1	0	1	0	0	0	0.0224009
8028	285.353	1	0	1	0	0	0	0.0223674
8030	285.387	1	0	1	0	0	0	0.0221948
8032	285.42	1	0	1	0	0	0	0.0221936
8034	285.453	1	0	1	0	0	0	0.0221249
8036	285.487	1	0	1	0	0	0	0.0222118
8038	285.52	1	0	1	0	0	0	0.0222141
8040	285.553	1	0	1	0	0	0	0.0222288
8042	285.587	1	0	1	0	0	0	0.0222595
8044	285.62	1	0	1	0	0	0	0.0222419
8046	285.653	1	0	1	0	0	0	0.022322
8048	285.687	1	0	1	0	0	0	0.0223271
8050	285.72	1	0	1	0	0	0	0.0223669
8052	285.753	1	0	1	0	0	0	0.0222947
8054	285.787	1	0	1	0	0	0	0.0222237
8056	285.82	1	0	1	0	0	0	0.0223413
8058	285.853	1	0	1	0	0	0	0.0223146
8060	285.887	1	0	1	0	0	0	0.0223532
8062	285.92	1	0	1	0	0	0	0.0222158
8064	285.953	1	0	1	0	0	0	0.0221096
8066	285.987	1	0	1	0	0	0	0.0221658
8068	286.02	1	0	1	0	0	0	0.0222749
8070	286.053	1	0	1	0	0	0	0.02236
8072	286.087	1	0	1	0	0	0	0.0222033
8074	286.12	1	0	1	0	0	0	0.0222567
8076	286.153	1	0	1	0	0	0	0.0222555
8078	286.187	1	0	1	0	0	0	0.0225032
8080	286.22	1	0	1	0	0	0	0.0225736
8082	286.253	1	0	1	0	0	0	0.0225208
8084	286.286	1	0	1	0	0	0	0.022577
8086	286.32	1	0	1	0	0	0	0.0226537
8088	286.353	1	0	1	0	0	0	0.0225673
8090	286.386	1	0	1	0	0	0	0.0225367
8092	286.42	1	0	1	0	0	0	0.0226077
8094	286.453	1	0	1	0	0	0	0.0227281
8096	286.486	1	0	1	0	0	0	0.0225969
8098	286.52	1	0	1	0	0	0	0.022452
8100	286.553	1	0	1	0	0	0	0.0222845
8102	286.586	1	0	1	0	0	0	0.0223527
8104	286.62	1	0	1	0	0	0	0.0224759
8106	286.653	1	0	1	0	0	0	0.0226446
8108	286.686	1	0	1	0	0	0	0.0225895
8110	286.72	1	0	1	0	0	0	0.0225565
8112	286.753	1	0	1	0	0	0	0.0225969
8114	286.786	1	0	1	0	0	0	0.0224668
8116	286.82	1	0	1	0	0	0	0.0224185
8118	286.853	1	0	1	0	0	0	0.0223424
8120	286.886	1	0	1	0	0	0	0.0222692
8122	286.92	1	0	1	0	0	0	0.0223629
8124	286.953	1	0	1	0	0	0	0.0223163
8126	286.986	1	0	1	0	0	0	0.0222362
8128	287.02	1	0	1	0	0	0	0.0222964
8130	287.053	1	0	1	0	0	0	0.0222078
8132	287.086	1	0	1	0	0	0	0.0222731
8134	287.12	1	0	1	0	0	0	0.0221857
8136	287.153	1	0	1	0	0	0	0.0223106
8138	287.186	1	0	1	0	0	0	0.0222925
8140	287.22	1	0	1	0	0	0	0.0222288
8142	287.253	1	0	1	0	0	0	0.0221238
8144	287.286	1	0	1	0	0	0	0.0220358
8146	287.32	1	0	1	0	0	0	0.0219897
8148	287.353	1	0	1	0	0	0	0.0219341
8150	287.386	1	0	1	0	0	0	0.0220028
8152	287.42	1	0	1	0	0	0	0.022017
8154	287.453	1	0	1	0	0	0	0.0218932
8156	287.486	1	0	1	0	0	0	0.0218915
8158	287.52	1	0	1	0	0	0	0.0217489
8160	287.553	1	0	1	0	0	0	0.0219102
8162	287.586	1	0	1	0	0	0	0.0219756
8164	287.62	1	0	1	0	0	0	0.0219034
8166	287.653	1	0	1	0	0	0	0.0220062
8168	287.686	1	0	1	0	0	0	0.0218455
8170	287.72	1	0	1	0	0	0	0.0218103
8172	287.753	1	0	1	0	0	0	0.0218546
8174	287.786	1	0	1	0	0	0	0.0220039
8176	287.82	1	0	1	0	0	0	0.0219733
8178	287.853	1	0	1	0	0	0	0.0220653
8180	287.886	1	0	1	0	0	0	0.022034
8182	287.92	1	0	1	0	0	0	0.0219591
8184	287.953	1	0	1	0	0	0	0.0221102
8186	287.986	1	0	1	0	0	0	0.0220908
8188	288.02	1	0	1	0	0	0	0.0220414
8190	288.053	1	0	1	0	0	0	0.0220346
8192	288.086	1	0	1	0	0	0	0.0220159
8194	288.12	1	0	1	0	0	0	0.022021
8196	288.153	1	0	1	0	0	0	0.0219034
8198	288.186	1	0	1	0	0	0	0.0219738
8200	288.22	1	0	1	0	0	0	0.0218665
8202	288.253	1	0	1	0	0	0	0.0217728
8204	288.286	1	0	1	0	0	0	0.0218892
8206	288.32	1	0	1	0	0	0	0.0219102
8208	288.353	1	0	1	0	0	0	0.0219744
8210	288.386	1	0	1	0	0	0	0.02218
8212	288.42	1	0	1	0	0	0	0.0222629
8214	288.453	1	0	1	0	0	0	0.0223504
8216	288.486	1	0	1	0	0	0	0.0222135
8218	288.52	1	0	1	0	0	0	0.0220096
8220	288.553	1	0	1	0	0	0	0.021896
8222	288.586	1	0	1	0	0	0	0.0219352
8224	288.62	1	0	1	0	0	0	0.0220113
8226	288.653	1	0	1	0	0	0	0.0220704
8228	288.686	1	0	1	0	0	0	0.0218716
8230	288.72	1	0	1	0	0	0	0.0216677
8232	288.753	1	0	1	0	0	0	0.0215399
8234	288.786	1	0	1	0	0	0	0.0215627
8236	288.82	1	0	1	0	0	0	0.0216115
8238	288.853	1	0	1	0	0	0	0.0217864
8240	288.886	1	0	1	0	0	0	0.0219829
8242	288.92	1	0	1	0	0	0	0.0220653
8244	288.953	1	0	1	0	0	0	0.0218784
8246	288.986	1	0	1	0	0	0	0.0218597
8248	289.02	1	0	1	0	0	0	0.021841
8250	289.053	1	0	1	0	0	0	0.0216552
8252	289.086	1	0	1	0	0	0	0.021766
8254	289.12	1	0	1	0	0	0	0.0216416
8256	289.153	1	0	1	0	0	0	0.021758
8258	289.186	1	0	1	0	0	0	0.0217921
8260	289.22	1	0	1	0	0	0	0.0219398
8262	289.253	1	0	1	0	0	0	0.0218688
8264	289.286	1	0	1	0	0	0	0.0218455
8266	289.32	1	0	1	0	0	0	0.0217984
8268	289.353	1	0	1	0	0	0	0.0219006
8270	289.386	1	0	1	0	0	0	0.0219903
8272	289.42	1	0	1	0	0	0	0.0219347
8274	289.453	1	0	1	0	0	0	0.0218955
8276	289.486	1	0	1	0	0	0	0.0218625
8278	289.52	1	0	1	0	0	0	0.021929
8280	289.553	1	0	1	0	0	0	0.0220369
8282	289.586	1	0	1	0	0	0	0.0220028
8284	289.62	1	0	1	0	0	0	0.0220363
8286	289.653	1	0	1	0	0	0	0.0218955
8288	289.686	1	0	1	0	0	0	0.0220113
8290	289.72	1	0	1	0	0	0	0.02208
8292	289.753	1	0	1	0	0	0	0.022088
8294	289.786	1	0	1	0	0	0	0.0221306
8296	289.82	1	0	1	0	0	0	0.0220216
8298	289.853	1	0	1	0	0	0	0.0220136
8300	289.886	1	0	1	0	0	0	0.0218977
8302	289.92	1	0	1	0	0	0	0.0218046
8304	289.953	1	0	1	0	0	0	0.0218307
8306	289.986	1	0	1	0	0	0	0.0218472
8308	290.02	1	0	1	0	0	0	0.0218421
8310	290.053	1	0	1	0	0	0	0.0218035
8312	290.086	1	0	1	0	0	0	0.021783
8314	290.12	1	0	1	0	0	0	0.0218597
8316	290.153	1	0	1	0	0	0	0.0219176
8318	290.186	1	0	1	0	0	0	0.022034
8320	290.22	1	0	1	0	0	0	0.022034
8322	290.253	1	0	1	0	0	0	0.022092
8324	290.286	1	0	1	0	0	0	0.0219596
8326	290.32	1	0	1	0	0	0	0.0219403
8328	290.353	1	0	1	0	0	0	0.0219892
8330	290.386	1	0	1	0	0	0	0.0219756
8332	290.42	1	0	1	0	0	0	0.02208
8334	290.453	1	0	1	0	0	0	0.0220988
8336	290.486	1	0	1	0	0	0	0.022105
8338	290.52	1	0	1	0	0	0	0.0220994
8340	290.553	1	0	1	0	0	0	0.0217796
8342	290.586	1	0	1	0	0	0	0.0218143
8344	290.62	1	0	1	0	0	0	0.0219381
8346	290.653	1	0	1	0	0	0	0.0219506
8348	290.686	1	0	1	0	0	0	0.0219676
8350	290.72	1	0	1	0	0	0	0.0219591
8352	290.753	1	0	1	0	0	0	0.022042
8354	290.786	1	0	1	0	0	0	0.0222215
8356	290.82	1	0	1	0	0	0	0.0222783
8358	290.853	1	0	1	0	0	0	0.0220681
8360	290.886	1	0	1	0	0	0	0.0220198
8362	290.92	1	0	1	0	0	0	0.0220085
8364	290.953	1	0	1	0	0	0	0.0220937
8366	290.986	1	0	1	0	0	0	0.0218801
8368	291.02	1	0	1	0	0	0	0.0219102
8370	291.053	1	0	1	0	0	0	0.022088
8372	291.086	1	0	1	0	0	0	0.0222663
8374	291.12	1	0	1	0	0	0	0.0221374
8376	291.153	1	0	1	0	0	0	0.0224327
8378	291.186	1	0	1	0	0	0	0.0224191
8380	291.22	1	0	1	0	0	0	0.0223316
8382	291.253	1	0	1	0	0	0	0.0222777
8384	291.286	1	0	1	0	0	0	0.0222521
8386	291.32	1	0	1	0	0	0	0.0222152
8388	291.353	1	0	1	0	0	0	0.0221658
8390	291.386	1	0	1	0	0	0	0.02223
8392	291.42	1	0	1	0	0	0	0.0221647
8394	291.453	1	0	1	0	0	0	0.0221329
8396	291.486	1	0	1	0	0	0	0.0220874
8398	291.52	1	0	1	0	0	0	0.0220261
8400	291.553	1	0	1	0	0	0	0.0219744
8402	291.586	1	0	1	0	0	0	0.0219188
8404	291.62	1	0	1	0	0	0	0.0219313
8406	291.653	1	0	1	0	0	0	0.0219369
8408	291.686	1	0	1	0	0	0	0.0221102
8410	291.72	1	0	1	0	0	0	0.0221925
8412	291.753	1	0	1	0	0	0	0.022138
8414	291.786	1	0	1	0	0	0	0.022276
8416	291.82	1	0	1	0	0	0	0.0222879
8418	291.853	1	0	1	0	0	0	0.0222334
8420	291.886	1	0	1	0	0	0	0.0221346
8422	291.92	1	0	1	0	0	0	0.0219858
8424	291.953	1	0	1	0	0	0	0.0219051
8426	291.986	1	0	1	0	0	0	0.0218654
8428	292.02	1	0	1	0	0	0	0.0219023
8430	292.053	1	0	1	0	0	0	0.0219494
8432	292.086	1	0	1	0	0	0	0.0219511
8434	292.12	1	0	1	0	0	0	0.0220085
8436	292.153	1	0	1	0	0	0	0.0220499
8438	292.186	1	0	1	0	0	0	0.0219602
8440	292.22	1	0	1	0	0	0	0.0220295
8442	292.253	1	0	1	0	0	0	0.0220971
8444	292.286	1	0	1	0	0	0	0.0221079
8446	292.32	1	0	1	0	0	0	0.0221709
8448	292.353	1	0	1	0	0	0	0.0222237
8450	292.386	1	0	1	0	0	0	0.0221391
8452	292.42	1	0	1	0	0	0	0.021933
8454	292.453	1	0	1	0	0	0	0.0218569
8456	292.486	1	0	1	0	0	0	0.0218177
8458	292.52	1	0	1	0	0	0	0.021758
8460	292.553	1	0	1	0	0	0	0.0217342
8462	292.586	1	0	1	0	0	0	0.0218194
8464	292.62	1	0	1	0	0	0	0.0218239
8466	292.653	1	0	1	0	0	0	0.0219006
8468	292.686	1	0	1	0	0	0	0.0219057
8470	292.72	1	0	1	0	0	0	0.0218807
8472	292.753	1	0	1	0	0	0	0.021954
8474	292.786	1	0	1	0	0	0	0.0219892
8476	292.82	1	0	1	0	0	0	0.0220568
8478	292.853	1	0	1	0	0	0	0.0220931
8480	292.886	1	0	1	0	0	0	0.0218966
8482	292.92	1	0	1	0	0	0	0.0218097
8484	292.953	1	0	1	0	0	0	0.0218495
8486	292.986	1	0	1	0	0	0	0.0220062
8488	293.02	1	0	1	0	0	0	0.0221516
8490	293.053	1	0	1	0	0	0	0.0221056
8492	293.086	1	0	1	0	0	0	0.0220443
8494	293.12	1	0	1	0	0	0	0.0221726
8496	293.153	1	0	1	0	0	0	0.0225066
8498	293.186	1	0	1	0	0	0	0.0226639
8500	293.22	1	0	1	0	0	0	0.0227184
8502	293.253	1	0	1	0	0	0	0.0226309
8504	293.286	1	0	1	0	0	0	0.0225401
8506	293.32	1	0	1	0	0	0	0.0224935
8508	293.353	1	0	1	0	0	0	0.022414
8510	293.386	1	0	1	0	0	0	0.0224202
8512	293.42	1	0	1	0	0	0	0.0223896
8514	293.453	1	0	1	0	0	0	0.0224776
8516	293.486	1	0	1	0	0	0	0.0224146
8518	293.52	1	0	1	0	0	0	0.022351
8520	293.553	1	0	1	0	0	0	0.022184
8522	293.586	1	0	1	0	0	0	0.0219375
8524	293.62	1	0	1	0	0	0	0.0219108
8526	293.653	1	0	1	0	0	0	0.0219614
8528	293.686	1	0	1	0	0	0	0.0219466
8530	293.72	1	0	1	0	0	0	0.0219659
8532	293.753	1	0	1	0	0	0	0.0218983
8534	293.786	1	0	1	0	0	0	0.0218864
8536	293.82	1	0	1	0	0	0	0.0219176
8538	293.853	1	0	1	0	0	0	0.0219403
8540	293.886	1	0	1	0	0	0	0.0219846
8542	293.92	1	0	1	0	0	0	0.0219301
8544	293.953	1	0	1	0	0	0	0.0219205
8546	293.986	1	0	1	0	0	0	0.0218659
8548	294.02	1	0	1	0	0	0	0.0218983
8550	294.053	1	0	1	0	0	0	0.0220528
8552	294.086	1	0	1	0	0	0	0.022
8554	294.12	1	0	1	0	0	0	0.0220426
8556	294.153	1	0	1	0	0	0	0.0220386
8558	294.186	1	0	1	0	0	0	0.0220159
8560	294.22	1	0	1	0	0	0	0.0219738
8562	294.253	1	0	1	0	0	0	0.022092
8564	294.286	1	0	1	0	0	0	0.0220908
8566	294.32	1	0	1	0	0	0	0.0220346
8568	294.353	1	0	1	0	0	0	0.0220619
8570	294.386	1	0	1	0	0	0	0.0219466
8572	294.42	1	0	1	0	0	0	0.0219932
8574	294.453	1	0	1	0	0	0	0.0220823
8576	294.486	1	0	1	0	0	0	0.022159
8578	294.52	1	0	1	0	0	0	0.0221584
8580	294.553	1	0	1	0	0	0	0.0221045
8582	294.586	1	0	1	0	0	0	0.0222005
8584	294.62	1	0	1	0	0	0	0.0221885
8586	294.653	1	0	1	0	0	0	0.0222669
8588	294.686	1	0	1	0	0	0	0.0223021
8590	294.719	1	0	1	0	0	0	0.0222726
8592	294.753	1	0	1	0	0	0	0.0221232
8594	294.786	1	0	1	0	0	0	0.0220982
8596	294.819	1	0	1	0	0	0	0.0219716
8598	294.853	1	0	1	0	0	0	0.0220318
8600	294.886	1	0	1	0	0	0	0.022247
8602	294.919	1	0	1	0	0	0	0.0223652
8604	294.953	1	0	1	0	0	0	0.0222266
8606	294.986	1	0	1	0	0	0	0.0219801
8608	295.019	1	0	1	0	0	0	0.0217484
8610	295.053	1	0	1	0	0	0	0.0217506
8612	295.086	1	0	1	0	0	0	0.0217938
8614	295.119	1	0	1	0	0	0	0.0218631
8616	295.153	1	0	1	0	0	0	0.0218784
8618	295.186	1	0	1	0	0	0	0.0219114
8620	295.219	1	0	1	0	0	0	0.0219029
8622	295.253	1	0	1	0	0	0	0.0218597
8624	295.286	1	0	1	0	0	0	0.0218586
8626	295.319	1	0	1	0	0	0	0.0216814
8628	295.353	1	0	1	0	0	0	0.0217251
8630	295.386	1	0	1	0	0	0	0.021829
8632	295.419	1	0	1	0	0	0	0.0218478
8634	295.453	1	0	1	0	0	0	0.0218796
8636	295.486	1	0	1	0	0	0	0.0218563
8638	295.519	1	0	1	0	0	0	0.0217347
8640	295.553	1	0	1	0	0	0	0.0216944
8642	295.586	1	0	1	0	0	0	0.0215842
8644	295.619	1	0	1	0	0	0	0.0215167
8646	295.653	1	0	1	0	0	0	0.0214354
8648	295.686	1	0	1	0	0	0	0.0214445
8650	295.719	1	0	1	0	0	0	0.021536
8652	295.753	1	0	1	0	0	0	0.0215803
8654	295.786	1	0	1	0	0	0	0.021632
8656	295.819	1	0	1	0	0	0	0.021511
8658	295.853	1	0	1	0	0	0	0.021536
8660	295.886	1	0	1	0	0	0	0.0214894
8662	295.919	1	0	1	0	0	0	0.0214269
8664	295.953	1	0	1	0	0	0	0.021478
8666	295.986	1	0	1	0	0	0	0.0213486
8668	296.019	1	0	1	0	0	0	0.0213718
8670	296.053	1	0	1	0	0	0	0.0212759
8672	296.086	1	0	1	0	0	0	0.021515
8674	296.119	1	0	1	0	0	0	0.021737
8676	296.153	1	0	1	0	0	0	0.0217064
8678	296.186	1	0	1	0	0	0	0.0215683
8680	296.219	1	0	1	0	0	0	0.0214758
8682	296.253	1	0	1	0	0	0	0.0215104
8684	296.286	1	0	1	0	0	0	0.0215791
8686	296.319	1	0	1	0	0	0	0.0215922
8688	296.353	1	0	1	0	0	0	0.0217177
8690	296.386	1	0	1	0	0	0	0.0217194
8692	296.419	1	0	1	0	0	0	0.0217535
8694	296.453	1	0	1	0	0	0	0.0217501
8696	296.486	1	0	1	0	0	0	0.0217478
8698	296.519	1	0	1	0	0	0	0.0217529
8700	296.553	1	0	1	0	0	0	0.0216586
8702	296.586	1	0	1	0	0	0	0.0217024
8704	296.619	1	0	1	0	0	0	0.0217694
8706	296.653	1	0	1	0	0	0	0.0217614
8708	296.686	1	0	1	0	0	0	0.0216956
8710	296.719	1	0	1	0	0	0	0.021779
8712	296.753	1	0	1	0	0	0	0.0219057
8714	296.786	1	0	1	0	0	0	0.0218852
8716	296.819	1	0	1	0	0	0	0.0219261
8718	296.853	1	0	1	0	0	0	0.0218796
8720	296.886	1	0	1	0	0	0	0.0216672
8722	296.919	1	0	1	0	0	0	0.0215689
8724	296.953	1	0	1	0	0	0	0.0216728
8726	296.986	1	0	1	0	0	0	0.0218245
8728	297.019	1	0	1	0	0	0	0.0217881
8730	297.053	1	0	1	0	0	0	0.0217955
8732	297.086	1	0	1	0	0	0	0.0216723
8734	297.119	1	0	1	0	0	0	0.0216797
8736	297.153	1	0	1	0	0	0	0.0215116
8738	297.186	1	0	1	0	0	0	0.0215706
8740	297.219	1	0	1	0	0	0	0.021595
8742	297.253	1	0	1	0	0	0	0.0214638
8744	297.286	1	0	1	0	0	0	0.021557
8746	297.319	1	0	1	0	0	0	0.0214065
8748	297.353	1	0	1	0	0	0	0.0213497
8750	297.386	1	0	1	0	0	0	0.0216007
8752	297.419	1	0	1	0	0	0	0.0220278
8754	297.453	1	0	1	0	0	0	0.0218813
8756	297.486	1	0	1	0	0	0	0.0217512
8758	297.519	1	0	1	0	0	0	0.0215848
8760	297.553	1	0	1	0	0	0	0.0213429
8762	297.586	1	0	1	0	0	0	0.0215541
8764	297.619	1	0	1	0	0	0	0.0216376
8766	297.653	1	0	1	0	0	0	0.0215757
8768	297.686	1	0	1	0	0	0	0.0215172
8770	297.719	1	0	1	0	0	0	0.021524
8772	297.753	1	0	1	0	0	0	0.0214735
8774	297.786	1	0	1	0	0	0	0.0215661
8776	297.819	1	0	1	0	0	0	0.0215354
8778	297.853	1	0	1	0	0	0	0.0214752
8780	297.886	1	0	1	0	0	0	0.0215456
8782	297.919	1	0	1	0	0	0	0.0215013
8784	297.953	1	0	1	0	0	0	0.0215008
8786	297.986	1	0	1	0	0	0	0.0215859
8788	298.019	1	0	1	0	0	0	0.0216609
8790	298.053	1	0	1	0	0	0	0.0217944
8792	298.086	1	0	1	0	0	0	0.0218194
8794	298.119	1	0	1	0	0	0	0.0217989
8796	298.153	1	0	1	0	0	0	0.0217416
8798	298.186	1	0	1	0	0	0	0.0216467
8800	298.219	1	0	1	0	0	0	0.021695
8802	298.253	1	0	1	0	0	0	0.0217342
8804	298.286	1	0	1	0	0	0	0.0218114
8806	298.319	1	0	1	0	0	0	0.0218001
8808	298.353	1	0	1	0	0	0	0.0218302
8810	298.386	1	0	1	0	0	0	0.0218591
8812	298.419	1	0	1	0	0	0	0.021733
8814	298.453	1	0	1	0	0	0	0.0217558
8816	298.486	1	0	1	0	0	0	0.0216859
8818	298.519	1	0	1	0	0	0	0.0215536
8820	298.553	1	0	1	0	0	0	0.0216115
8822	298.586	1	0	1	0	0	0	0.0219114
8824	298.619	1	0	1	0	0	0	0.0218813
8826	298.653	1	0	1	0	0	0	0.021925
8828	298.686	1	0	1	0	0	0	0.0219295
8830	298.719	1	0	1	0	0	0	0.0220431
8832	298.753	1	0	1	0	0	0	0.0220028
8834	298.786	1	0	1	0	0	0	0.0218676
8836	298.819	1	0	1	0	0	0	0.0218324
8838	298.853	1	0	1	0	0	0	0.0216297
8840	298.886	1	0	1	0	0	0	0.0216058
8842	298.919	1	0	1	0	0	0	0.0217711
8844	298.953	1	0	1	0	0	0	0.0218245
8846	298.986	1	0	1	0	0	0	0.0217467
8848	299.019	1	0	1	0	0	0	0.021457
8850	299.053	1	0	1	0	0	0	0.0213701
8852	299.086	1	0	1	0	0	0	0.0214076
8854	299.119	1	0	1	0	0	0	0.0214252
8856	299.153	1	0	1	0	0	0	0.0215382
8858	299.186	1	0	1	0	0	0	0.0215229
8860	299.219	1	0	1	0	0	0	0.0214031
8862	299.253	1	0	1	0	0	0	0.021482
8864	299.286	1	0	1	0	0	0	0.0213292
8866	299.319	1	0	1	0	0	0	0.0213997
8868	299.353	1	0	1	0	0	0	0.0214565
8870	299.386	1	0	1	0	0	0	0.021616
8872	299.419	1	0	1	0	0	0	0.0216155
8874	299.453	1	0	1	0	0	0	0.0215683
8876	299.486	1	0	1	0	0	0	0.0216348
8878	299.519	1	0	1	0	0	0	0.0215371
8880	299.553	1	0	1	0	0	0	0.0216615
8882	299.586	1	0	1	0	0	0	0.0217268
8884	299.619	1	0	1	0	0	0	0.0216217
8886	299.653	1	0	1	0	0	0	0.0217444
8888	299.686	1	0	1	0	0	0	0.0217223
8890	299.719	1	0	1	0	0	0	0.021699
8892	299.753	1	0	1	0	0	0	0.0217984
8894	299.786	1	0	1	0	0	0	0.0217126
8896	299.819	1	0	1	0	0	0	0.0216371
8898	299.853	1	0	1	0	0	0	0.0217166
8900	299.886	1	0	1	0	0	0	0.0217705
8902	299.919	1	0	1	0	0	0	0.0217524
8904	299.953	1	0	1	0	0	0	0.0217807
8906	299.986	1	0	1	0	0	0	0.0218165
8908	300.019	1	0	1	0	0	0	0.0216768
8910	300.053	1	0	1	0	0	0	0.0217467
8912	300.086	1	0	1	0	0	0	0.021691
8914	300.119	1	0	1	0	0	0	0.0215837
8916	300.153	1	0	1	0	0	0	0.0218665
8918	300.186	1	0	1	0	0	0	0.02195
8920	300.219	1	0	1	0	0	0	0.0220852
8922	300.253	1	0	1	0	0	0	0.02195
8924	300.286	1	0	1	0	0	0	0.0219068
8926	300.319	1	0	1	0	0	0	0.0219523
8928	300.353	1	0	1	0	0	0	0.0222856
8930	300.386	1	0	1	0	0	0	0.0223174
8932	300.419	1	0	1	0	0	0	0.0222124
8934	300.453	1	0	1	0	0	0	0.0222027
8936	300.486	1	0	1	0	0	0	0.0222192
8938	300.519	1	0	1	0	0	0	0.0221675
8940	300.553	1	0	1	0	0	0	0.0222198
8942	300.586	1	0	1	0	0	0	0.0221806
8944	300.619	1	0	1	0	0	0	0.02218
8946	300.653	1	0	1	0	0	0	0.0219091
8948	300.686	1	0	1	0	0	0	0.0217325
8950	300.719	1	0	1	0	0	0	0.0218074
8952	300.753	1	0	1	0	0	0	0.0218909
8954	300.786	1	0	1	0	0	0	0.021946
8956	300.819	1	0	1	0	0	0	0.0219824
8958	300.853	1	0	1	0	0	0	0.0220159
8960	300.886	1	0	1	0	0	0	0.0219136
8962	300.919	1	0	1	0	0	0	0.0218495
8964	300.953	1	0	1	0	0	0	0.0217978
8966	300.986	1	0	1	0	0	0	0.0218767
8968	301.019	1	0	1	0	0	0	0.0219244
8970	301.053	1	0	1	0	0	0	0.021975
8972	301.086	1	0	1	0	0	0	0.0219318
8974	301.119	1	0	1	0	0	0	0.0218881
8976	301.153	1	0	1	0	0	0	0.0217989
8978	301.186	1	0	1	0	0	0	0.0217251
8980	301.219	1	0	1	0	0	0	0.021649
8982	301.253	1	0	1	0	0	0	0.0216183
8984	301.286	1	0	1	0	0	0	0.0215842
8986	301.319	1	0	1	0	0	0	0.0215581
8988	301.353	1	0	1	0	0	0	0.0215314
8990	301.386	1	0	1	0	0	0	0.0215956
8992	301.419	1	0	1	0	0	0	0.0215189
8994	301.453	1	0	1	0	0	0	0.0215894
8996	301.486	1	0	1	0	0	0	0.0216734
8998	301.519	1	0	1	0	0	0	0.0216212
9000	301.553	1	0	1	0	0	0	0.0216763
9002	301.586	1	0	1	0	0	0	0.0216922
9004	301.619	1	0	1	0	0	0	0.0214962
9006	301.653	1	0	1	0	0	0	0.02157
9008	301.686	1	0	1	0	0	0	0.0217847
9010	301.719	1	0	1	0	0	0	0.0218926
9012	301.753	1	0	1	0	0	0	0.0219574
9014	301.786	1	0	1	0	0	0	0.0218427
9016	301.819	1	0	1	0	0	0	0.0218733
9018	301.853	1	0	1	0	0	0	0.0216371
9020	301.886	1	0	1	0	0	0	0.0215547
9022	301.919	1	0	1	0	0	0	0.0215706
9024	301.953	1	0	1	0	0	0	0.021628
9026	301.986	1	0	1	0	0	0	0.0216592
9028	302.019	1	0	1	0	0	0	0.0214843
9030	302.053	1	0	1	0	0	0	0.0213469
9032	302.086	1	0	1	0	0	0	0.0214315
9034	302.119	1	0	1	0	0	0	0.0213798
9036	302.153	1	0	1	0	0	0	0.0216075
9038	302.186	1	0	1	0	0	0	0.0214707
9040	302.219	1	0	1	0	0	0	0.0215081
9042	302.253	1	0	1	0	0	0	0.0215439
9044	302.286	1	0	1	0	0	0	0.021549
9046	302.319	1	0	1	0	0	0	0.0215155
9048	302.353	1	0	1	0	0	0	0.0215206
9050	302.386	1	0	1	0	0	0	0.0215411
9052	302.419	1	0	1	0	0	0	0.0215945
9054	302.453	1	0	1	0	0	0	0.0216251
9056	302.486	1	0	1	0	0	0	0.0217302
9058	302.519	1	0	1	0	0	0	0.0214792
9060	302.553	1	0	1	0	0	0	0.0213923
9062	302.586	1	0	1	0	0	0	0.021536
9064	302.619	1	0	1	0	0	0	0.021632
9066	302.653	1	0	1	0	0	0	0.0215411
9068	302.686	1	0	1	0	0	0	0.0215615
9070	302.719	1	0	1	0	0	0	0.0215769
9072	302.753	1	0	1	0	0	0	0.0215519
9074	302.786	1	0	1	0	0	0	0.0215854
9076	302.819	1	0	1	0	0	0	0.0217631
9078	302.853	1	0	1	0	0	0	0.0216893
9080	302.886	1	0	1	0	0	0	0.0217438
9082	302.919	1	0	1	0	0	0	0.0217359
9084	302.953	1	0	1	0	0	0	0.0218563
9086	302.986	1	0	1	0	0	0	0.0218779
9088	303.019	1	0	1	0	0	0	0.0218194
9090	303.052	1	0	1	0	0	0	0.0217773
9092	303.086	1	0	1	0	0	0	0.0218733
9094	303.119	1	0	1	0	0	0	0.0219301
9096	303.153	1	0	1	0	0	0	0.0219369
9098	303.186	1	0	1	0	0	0	0.0218586
9100	303.219	1	0	1	0	0	0	0.021783
9102	303.252	1	0	1	0	0	0	0.0216609
9104	303.286	1	0	1	0	0	0	0.0216314
9106	303.319	1	0	1	0	0	0	0.0214707
9108	303.352	1	0	1	0	0	0	0.0215905
9110	303.386	1	0	1	0	0	0	0.0216973
9112	303.419	1	0	1	0	0	0	0.0217205
9114	303.452	1	0	1	0	0	0	0.0217819
9116	303.486	1	0	1	0	0	0	0.0217228
9118	303.519	1	0	1	0	0	0	0.0217461
9120	303.552	1	0	1	0	0	0	0.0217739
9122	303.586	1	0	1	0	0	0	0.0217455
9124	303.619	1	0	1	0	0	0	0.0217569
9126	303.652	1	0	1	0	0	0	0.0217257
9128	303.686	1	0	1	0	0	0	0.0216734
9130	303.719	1	0	1	0	0	0	0.0217626
9132	303.752	1	0	1	0	0	0	0.0217217
9134	303.786	1	0	1	0	0	0	0.0216365
9136	303.819	1	0	1	0	0	0	0.0215825
9138	303.852	1	0	1	0	0	0	0.0215797
9140	303.886	1	0	1	0	0	0	0.0216001
9142	303.919	1	0	1	0	0	0	0.0216916
9144	303.952	1	0	1	0	0	0	0.0218165
9146	303.986	1	0	1	0	0	0	0.021896
9148	304.019	1	0	1	0	0	0	0.0219301
9150	304.052	1	0	1	0	0	0	0.0220221
9152	304.086	1	0	1	0	0	0	0.0220965
9154	304.119	1	0	1	0	0	0	0.0221306
9156	304.152	1	0	1	0	0	0	0.0219596
9158	304.186	1	0	1	0	0	0	0.0219897
9160	304.219	1	0	1	0	0	0	0.0220999
9162	304.252	1	0	1	0	0	0	0.0221266
9164	304.286	1	0	1	0	0	0	0.0221261
9166	304.319	1	0	1	0	0	0	0.022034
9168	304.352	1	0	1	0	0	0	0.0220556
9170	304.386	1	0	1	0	0	0	0.0220755
9172	304.419	1	0	1	0	0	0	0.0220607
9174	304.452	1	0	1	0	0	0	0.0220534
9176	304.486	1	0	1	0	0	0	0.022038
9178	304.519	1	0	1	0	0	0	0.0220346
9180	304.552	1	0	1	0	0	0	0.0219909
9182	304.586	1	0	1	0	0	0	0.021883
9184	304.619	1	0	1	0	0	0	0.0218699
9186	304.652	1	0	1	0	0	0	0.0218563
9188	304.686	1	0	1	0	0	0	0.0218205
9190	304.719	1	0	1	0	0	0	0.0217376
9192	304.752	1	0	1	0	0	0	0.0218097
9194	304.786	1	0	1	0	0	0	0.0216291
9196	304.819	1	0	1	0	0	0	0.0215797
9198	304.852	1	0	1	0	0	0	0.0217552
9200	304.886	1	0	1	0	0	0	0.0218705
9202	304.919	1	0	1	0	0	0	0.0219511
9204	304.952	1	0	1	0	0	0	0.0218245
9206	304.986	1	0	1	0	0	0	0.0215309
9208	305.019	1	0	1	0	0	0	0.021444
9210	305.052	1	0	1	0	0	0	0.0214088
9212	305.086	1	0	1	0	0	0	0.0215797
9214	305.119	1	0	1	0	0	0	0.0216365
9216	305.152	1	0	1	0	0	0	0.0216927
9218	305.186	1	0	1	0	0	0	0.0215394
9220	305.219	1	0	1	0	0	0	0.0215008
9222	305.252	1	0	1	0	0	0	0.0216609
9224	305.286	1	0	1	0	0	0	0.0218642
9226	305.319	1	0	1	0	0	0	0.0219182
9228	305.352	1	0	1	0	0	0	0.0218245
9230	305.386	1	0	1	0	0	0	0.021741
9232	305.419	1	0	1	0	0	0	0.0216808
9234	305.452	1	0	1	0	0	0	0.0215666
9236	305.486	1	0	1	0	0	0	0.0216058
9238	305.519	1	0	1	0	0	0	0.0215286
9240	305.552	1	0	1	0	0	0	0.0214922
9242	305.586	1	0	1	0	0	0	0.021595
9244	305.619	1	0	1	0	0	0	0.0214366
9246	305.652	1	0	1	0	0	0	0.0214519
9248	305.686	1	0	1	0	0	0	0.0217103
9250	305.719	1	0	1	0	0	0	0.0218109
9252	305.752	1	0	1	0	0	0	0.0218449
9254	305.786	1	0	1	0	0	0	0.0218938
9256	305.819	1	0	1	0	0	0	0.0218148
9258	305.852	1	0	1	0	0	0	0.0216797
9260	305.886	1	0	1	0	0	0	0.021624
9262	305.919	1	0	1	0	0	0	0.0217489
9264	305.952	1	0	1	0	0	0	0.0216592
9266	305.986	1	0	1	0	0	0	0.0215842
9268	306.019	1	0	1	0	0	0	0.0215598
9270	306.052	1	0	1	0	0	0	0.021733
9272	306.086	1	0	1	0	0	0	0.0220079
9274	306.119	1	0	1	0	0	0	0.021925
9276	306.152	1	0	1	0	0	0	0.0218517
9278	306.186	1	0	1	0	0	0	0.0217614
9280	306.219	1	0	1	0	0	0	0.0219875
9282	306.252	1	0	1	0	0	0	0.0219727
9284	306.286	1	0	1	0	0	0	0.022013
9286	306.319	1	0	1	0	0	0	0.0220772
9288	306.352	1	0	1	0	0	0	0.0219761
9290	306.386	1	0	1	0	0	0	0.0220613
9292	306.419	1	0	1	0	0	0	0.0221624
9294	306.452	1	0	1	0	0	0	0.0221437
9296	306.486	1	0	1	0	0	0	0.0220607
9298	306.519	1	0	1	0	0	0	0.0219738
9300	306.552	1	0	1	0	0	0	0.0219239
9302	306.586	1	0	1	0	0	0	0.0221022
9304	306.619	1	0	1	0	0	0	0.0220159
9306	306.652	1	0	1	0	0	0	0.0220216
9308	306.686	1	0	1	0	0	0	0.0221442
9310	306.719	1	0	1	0	0	0	0.0222175
9312	306.752	1	0	1	0	0	0	0.0221272
9314	306.786	1	0	1	0	0	0	0.0219954
9316	306.819	1	0	1	0	0	0	0.0220392
9318	306.852	1	0	1	0	0	0	0.0218841
9320	306.886	1	0	1	0	0	0	0.0219756
9322	306.919	1	0	1	0	0	0	0.021921
9324	306.952	1	0	1	0	0	0	0.0218603
9326	306.986	1	0	1	0	0	0	0.0218131
9328	307.019	1	0	1	0	0	0	0.0217592
9330	307.052	1	0	1	0	0	0	0.02195
9332	307.086	1	0	1	0	0	0	0.0218591
9334	307.119	1	0	1	0	0	0	0.0218302
9336	307.152	1	0	1	0	0	0	0.021733
9338	307.186	1	0	1	0	0	0	0.0217842
9340	307.219	1	0	1	0	0	0	0.0219812
9342	307.252	1	0	1	0	0	0	0.022
9344	307.286	1	0	1	0	0	0	0.0219352
9346	307.319	1	0	1	0	0	0	0.0220363
9348	307.352	1	0	1	0	0	0	0.0221403
9350	307.386	1	0	1	0	0	0	0.0221249
9352	307.419	1	0	1	0	0	0	0.0221488
9354	307.452	1	0	1	0	0	0	0.0220749
9356	307.486	1	0	1	0	0	0	0.0219949
9358	307.519	1	0	1	0	0	0	0.0219324
9360	307.552	1	0	1	0	0	0	0.0218949
9362	307.586	1	0	1	0	0	0	0.0219261
9364	307.619	1	0	1	0	0	0	0.0219523
9366	307.652	1	0	1	0	0	0	0.0217467
9368	307.686	1	0	1	0	0	0	0.0217927
9370	307.719	1	0	1	0	0	0	0.0217904
9372	307.752	1	0	1	0	0	0	0.0218835
9374	307.786	1	0	1	0	0	0	0.0219295
9376	307.819	1	0	1	0	0	0	0.0217734
9378	307.852	1	0	1	0	0	0	0.0218091
9380	307.886	1	0	1	0	0	0	0.0217989
9382	307.919	1	0	1	0	0	0	0.0218233
9384	307.952	1	0	1	0	0	0	0.0220363
9386	307.986	1	0	1	0	0	0	0.0218904
9388	308.019	1	0	1	0	0	0	0.0218012
9390	308.052	1	0	1	0	0	0	0.02162
9392	308.086	1	0	1	0	0	0	0.0216229
9394	308.119	1	0	1	0	0	0	0.0215718
9396	308.152	1	0	1	0	0	0	0.0215576
9398	308.186	1	0	1	0	0	0	0.0216456
9400	308.219	1	0	1	0	0	0	0.0214741
9402	308.252	1	0	1	0	0	0	0.0213236
9404	308.286	1	0	1	0	0	0	0.021549
9406	308.319	1	0	1	0	0	0	0.0216081
9408	308.352	1	0	1	0	0	0	0.0215524
9410	308.386	1	0	1	0	0	0	0.0215411
9412	308.419	1	0	1	0	0	0	0.021561
9414	308.452	1	0	1	0	0	0	0.0215081
9416	308.486	1	0	1	0	0	0	0.0216621
9418	308.519	1	0	1	0	0	0	0.0217427
9420	308.552	1	0	1	0	0	0	0.0217308
9422	308.586	1	0	1	0	0	0	0.0218091
9424	308.619	1	0	1	0	0	0	0.021762
9426	308.652	1	0	1	0	0	0	0.0215939
9428	308.686	1	0	1	0	0	0	0.0215661
9430	308.719	1	0	1	0	0	0	0.0217972
9432	308.752	1	0	1	0	0	0	0.0217512
9434	308.786	1	0	1	0	0	0	0.0215473
9436	308.819	1	0	1	0	0	0	0.0214536
9438	308.852	1	0	1	0	0	0	0.0213048
9440	308.886	1	0	1	0	0	0	0.0214775
9442	308.919	1	0	1	0	0	0	0.0216081
9444	308.952	1	0	1	0	0	0	0.0217109
9446	308.986	1	0	1	0	0	0	0.0216399
9448	309.019	1	0	1	0	0	0	0.0215377
9450	309.052	1	0	1	0	0	0	0.021432
9452	309.086	1	0	1	0	0	0	0.0213639
9454	309.119	1	0	1	0	0	0	0.0214917
9456	309.152	1	0	1	0	0	0	0.0216081
9458	309.186	1	0	1	0	0	0	0.0214718
9460	309.219	1	0	1	0	0	0	0.0212594
9462	309.252	1	0	1	0	0	0	0.0213298
9464	309.286	1	0	1	0	0	0	0.0213764
9466	309.319	1	0	1	0	0	0	0.0214599
9468	309.352	1	0	1	0	0	0	0.0215859
9470	309.386	1	0	1	0	0	0	0.021632
9472	309.419	1	0	1	0	0	0	0.0215842
9474	309.452	1	0	1	0	0	0	0.0214673
9476	309.486	1	0	1	0	0	0	0.0214224
9478	309.519	1	0	1	0	0	0	0.0213491
9480	309.552	1	0	1	0	0	0	0.0212361
9482	309.586	1	0	1	0	0	0	0.0212509
9484	309.619	1	0	1	0	0	0	0.0210777
9486	309.652	1	0	1	0	0	0	0.0211299
9488	309.686	1	0	1	0	0	0	0.0211282
9490	309.719	1	0	1	0	0	0	0.0212282
9492	309.752	1	0	1	0	0	0	0.021465
9494	309.786	1	0	1	0	0	0	0.0216007
9496	309.819	1	0	1	0	0	0	0.0215064
9498	309.852	1	0	1	0	0	0	0.0215093
9500	309.886	1	0	1	0	0	0	0.0215871
9502	309.919	1	0	1	0	0	0	0.0217081
9504	309.952	1	0	1	0	0	0	0.0217728
9506	309.986	1	0	1	0	0	0	0.0217541
9508	310.019	1	0	1	0	0	0	0.0214519
9510	310.052	1	0	1	0	0	0	0.0213576
9512	310.086	1	0	1	0	0	0	0.0213406
9514	310.119	1	0	1	0	0	0	0.0213832
9516	310.152	1	0	1	0	0	0	0.0215121
9518	310.186	1	0	1	0	0	0	0.0215939
9520	310.219	1	0	1	0	0	0	0.0215644
9522	310.252	1	0	1	0	0	0	0.0214792
9524	310.286	1	0	1	0	0	0	0.0214144
9526	310.319	1	0	1	0	0	0	0.0214099
9528	310.352	1	0	1	0	0	0	0.0213889
9530	310.386	1	0	1	0	0	0	0.0213838
9532	310.419	1	0	1	0	0	0	0.0215053
9534	310.452	1	0	1	0	0	0	0.021524
9536	310.486	1	0	1	0	0	0	0.0215502
9538	310.519	1	0	1	0	0	0	0.0215223
9540	310.552	1	0	1	0	0	0	0.0219682
9542	310.586	1	0	1	0	0	0	0.0220988
9544	310.619	1	0	1	0	0	0	0.0219693
9546	310.652	1	0	1	0	0	0	0.0219176
9548	310.686	1	0	1	0	0	0	0.021854
9550	310.719	1	0	1	0	0	0	0.0217126
9552	310.752	1	0	1	0	0	0	0.0215354
9554	310.786	1	0	1	0	0	0	0.0213031
9556	310.819	1	0	1	0	0	0	0.0215326
9558	310.852	1	0	1	0	0	0	0.0215683
9560	310.886	1	0	1	0	0	0	0.0218336
9562	310.919	1	0	1	0	0	0	0.0218097
9564	310.952	1	0	1	0	0	0	0.0220125
9566	310.986	1	0	1	0	0	0	0.0220312
9568	311.019	1	0	1	0	0	0	0.0219324
9570	311.052	1	0	1	0	0	0	0.0216865
9572	311.086	1	0	1	0	0	0	0.0216791
9574	311.119	1	0	1	0	0	0	0.0216007
9576	311.152	1	0	1	0	0	0	0.0215513
9578	311.186	1	0	1	0	0	0	0.0215081
9580	311.219	1	0	1	0	0	0	0.0214457
9582	311.252	1	0	1	0	0	0	0.0213934
9584	311.286	1	0	1	0	0	0	0.0213542
9586	311.319	1	0	1	0	0	0	0.0214377
9588	311.352	1	0	1	0	0	0	0.0213877
9590	311.386	1	0	1	0	0	0	0.0213889
9592	311.419	1	0	1	0	0	0	0.0214832
9594	311.452	1	0	1	0	0	0	0.0213929
9596	311.486	1	0	1	0	0	0	0.0213429
9598	311.519	1	0	1	0	0	0	0.0214116
9600	311.552	1	0	1	0	0	0	0.0214797
9602	311.586	1	0	1	0	0	0	0.0214423
9604	311.619	1	0	1	0	0	0	0.0215377
9606	311.652	1	0	1	0	0	0	0.021582
9608	311.686	1	0	1	0	0	0	0.0215496
9610	311.719	1	0	1	0	0	0	0.0215445
9612	311.752	1	0	1	0	0	0	0.0215871
9614	311.785	1	0	1	0	0	0	0.0216984
9616	311.819	1	0	1	0	0	0	0.0216677
9618	311.852	1	0	1	0	0	0	0.0216092
9620	311.885	1	0	1	0	0	0	0.0215098
9622	311.919	1	0	1	0	0	0	0.0215053
9624	311.952	1	0	1	0	0	0	0.0215184
9626	311.985	1	0	1	0	0	0	0.0213372
9628	312.019	1	0	1	0	0	0	0.0213281
9630	312.052	1	0	1	0	0	0	0.0213656
9632	312.085	1	0	1	0	0	0	0.0217012
9634	312.119	1	0	1	0	0	0	0.0216814
9636	312.152	1	0	1	0	0	0	0.0216961
9638	312.185	1	0	1	0	0	0	0.0218847
9640	312.219	1	0	1	0	0	0	0.0219193
9642	312.252	1	0	1	0	0	0	0.0219687
9644	312.285	1	0	1	0	0	0	0.0220693
9646	312.319	1	0	1	0	0	0	0.0219012
9648	312.352	1	0	1	0	0	0	0.021758
9650	312.385	1	0	1	0	0	0	0.0217018
9652	312.419	1	0	1	0	0	0	0.0217052
9654	312.452	1	0	1	0	0	0	0.0218199
9656	312.485	1	0	1	0	0	0	0.0217592
9658	312.519	1	0	1	0	0	0	0.0216683
9660	312.552	1	0	1	0	0	0	0.021578
9662	312.585	1	0	1	0	0	0	0.0215842
9664	312.619	1	0	1	0	0	0	0.0216456
9666	312.652	1	0	1	0	0	0	0.021507
9668	312.685	1	0	1	0	0	0	0.0214644
9670	312.719	1	0	1	0	0	0	0.0214519
9672	312.752	1	0	1	0	0	0	0.0214389
9674	312.785	1	0	1	0	0	0	0.0214014
9676	312.819	1	0	1	0	0	0	0.0215201
9678	312.852	1	0	1	0	0	0	0.0215962
9680	312.885	1	0	1	0	0	0	0.0215752
9682	312.919	1	0	1	0	0	0	0.0216728
9684	312.952	1	0	1	0	0	0	0.0216302
9686	312.985	1	0	1	0	0	0	0.0216036
9688	313.019	1	0	1	0	0	0	0.0217455
9690	313.052	1	0	1	0	0	0	0.021724
9692	313.085	1	0	1	0	0	0	0.0217626
9694	313.119	1	0	1	0	0	0	0.0217524
9696	313.152	1	0	1	0	0	0	0.0216995
9698	313.185	1	0	1	0	0	0	0.0217705
9700	313.219	1	0	1	0	0	0	0.0217768
9702	313.252	1	0	1	0	0	0	0.0218392
9704	313.285	1	0	1	0	0	0	0.0217115
9706	313.319	1	0	1	0	0	0	0.0216467
9708	313.352	1	0	1	0	0	0	0.0216081
9710	313.385	1	0	1	0	0	0	0.0214621
9712	313.419	1	0	1	0	0	0	0.0215365
9714	313.452	1	0	1	0	0	0	0.0215735
9716	313.485	1	0	1	0	0	0	0.0216603
9718	313.519	1	0	1	0	0	0	0.0219381
9720	313.552	1	0	1	0	0	0	0.0220499
9722	313.585	1	0	1	0	0	0	0.0220772
9724	313.619	1	0	1	0	0	0	0.0219466
9726	313.652	1	0	1	0	0	0	0.0217944
9728	313.685	1	0	1	0	0	0	0.0217711
9730	313.719	1	0	1	0	0	0	0.0218296
9732	313.752	1	0	1	0	0	0	0.0219244
9734	313.785	1	0	1	0	0	0	0.0218182
9736	313.819	1	0	1	0	0	0	0.0219114
9738	313.852	1	0	1	0	0	0	0.0219455
9740	313.885	1	0	1	0	0	0	0.0219244
9742	313.919	1	0	1	0	0	0	0.0217251
9744	313.952	1	0	1	0	0	0	0.0214513
9746	313.985	1	0	1	0	0	0	0.0215138
9748	314.019	1	0	1	0	0	0	0.0216802
9750	314.052	1	0	1	0	0	0	0.0217779
9752	314.085	1	0	1	0	0	0	0.0216797
9754	314.119	1	0	1	0	0	0	0.0214178
9756	314.152	1	0	1	0	0	0	0.0214485
9758	314.185	1	0	1	0	0	0	0.0216586
9760	314.219	1	0	1	0	0	0	0.0218506
9762	314.252	1	0	1	0	0	0	0.0219829
9764	314.285	1	0	1	0	0	0	0.0217546
9766	314.319	1	0	1	0	0	0	0.0215831
9768	314.352	1	0	1	0	0	0	0.021482
9770	314.385	1	0	1	0	0	0	0.0215229
9772	314.419	1	0	1	0	0	0	0.0217404
9774	314.452	1	0	1	0	0	0	0.0218001
9776	314.485	1	0	1	0	0	0	0.0219477
9778	314.519	1	0	1	0	0	0	0.021841
9780	314.552	1	0	1	0	0	0	0.021666
9782	314.585	1	0	1	0	0	0	0.0215479
9784	314.619	1	0	1	0	0	0	0.0215445
9786	314.652	1	0	1	0	0	0	0.0215008
9788	314.685	1	0	1	0	0	0	0.0214241
9790	314.719	1	0	1	0	0	0	0.0213855
9792	314.752	1	0	1	0	0	0	0.0214144
9794	314.785	1	0	1	0	0	0	0.0213537
9796	314.819	1	0	1	0	0	0	0.0214661
9798	314.852	1	0	1	0	0	0	0.0215769
9800	314.885	1	0	1	0	0	0	0.0216745
9802	314.919	1	0	1	0	0	0	0.021365
9804	314.952	1	0	1	0	0	0	0.0212645
9806	314.985	1	0	1	0	0	0	0.021302
9808	315.019	1	0	1	0	0	0	0.0212117
9810	315.052	1	0	1	0	0	0	0.0211702
9812	315.085	1	0	1	0	0	0	0.0211742
9814	315.119	1	0	1	0	0	0	0.0211969
9816	315.152	1	0	1	0	0	0	0.0211963
9818	315.185	1	0	1	0	0	0	0.0212043
9820	315.219	1	0	1	0	0	0	0.0212003
9822	315.252	1	0	1	0	0	0	0.0211384
9824	315.285	1	0	1	0	0	0	0.0211515
9826	315.319	1	0	1	0	0	0	0.0211538
9828	315.352	1	0	1	0	0	0	0.0212026
9830	315.385	1	0	1	0	0	0	0.0213537
9832	315.419	1	0	1	0	0	0	0.0214945
9834	315.452	1	0	1	0	0	0	0.021582
9836	315.485	1	0	1	0	0	0	0.0214525
9838	315.519	1	0	1	0	0	0	0.0212895
9840	315.552	1	0	1	0	0	0	0.021319
9842	315.585	1	0	1	0	0	0	0.0214406
9844	315.619	1	0	1	0	0	0	0.0215899
9846	315.652	1	0	1	0	0	0	0.0215093
9848	315.685	1	0	1	0	0	0	0.0213662
9850	315.719	1	0	1	0	0	0	0.0212884
9852	315.752	1	0	1	0	0	0	0.0214235
9854	315.785	1	0	1	0	0	0	0.0214212
9856	315.819	1	0	1	0	0	0	0.0213315
9858	315.852	1	0	1	0	0	0	0.0213599
9860	315.885	1	0	1	0	0	0	0.0215445
9862	315.919	1	0	1	0	0	0	0.0214434
9864	315.952	1	0	1	0	0	0	0.0214082
9866	315.985	1	0	1	0	0	0	0.0215763
9868	316.019	1	0	1	0	0	0	0.0215127
9870	316.052	1	0	1	0	0	0	0.0215507
9872	316.085	1	0	1	0	0	0	0.0216007
9874	316.119	1	0	1	0	0	0	0.0214724
9876	316.152	1	0	1	0	0	0	0.0215292
9878	316.185	1	0	1	0	0	0	0.0215644
9880	316.219	1	0	1	0	0	0	0.0213531
9882	316.252	1	0	1	0	0	0	0.0212412
9884	316.285	1	0	1	0	0	0	0.0214508
9886	316.319	1	0	1	0	0	0	0.0214604
9888	316.352	1	0	1	0	0	0	0.0216382
9890	316.385	1	0	1	0	0	0	0.0215979
9892	316.419	1	0	1	0	0	0	0.0216285
9894	316.452	1	0	1	0	0	0	0.0217347
9896	316.485	1	0	1	0	0	0	0.0217194
9898	316.519	1	0	1	0	0	0	0.021536
9900	316.552	1	0	1	0	0	0	0.0214758
9902	316.585	1	0	1	0	0	0	0.021561
9904	316.619	1	0	1	0	0	0	0.02162
9906	316.652	1	0	1	0	0	0	0.0212759
9908	316.685	1	0	1	0	0	0	0.021348
9910	316.719	1	0	1	0	0	0	0.021553
9912	316.752	1	0	1	0	0	0	0.0215837
9914	316.785	1	0	1	0	0	0	0.0215615
9916	316.819	1	0	1	0	0	0	0.0215558
9918	316.852	1	0	1	0	0	0	0.0214797
9920	316.885	1	0	1	0	0	0	0.0215848
9922	316.919	1	0	1	0	0	0	0.0214837
9924	316.952	1	0	1	0	0	0	0.0212452
9926	316.985	1	0	1	0	0	0	0.021118
9928	317.019	1	0	1	0	0	0	0.0211373
9930	317.052	1	0	1	0	0	0	0.0211884
9932	317.085	1	0	1	0	0	0	0.0212043
9934	317.119	1	0	1	0	0	0	0.0213645
9936	317.152	1	0	1	0	0	0	0.0213514
9938	317.185	1	0	1	0	0	0	0.021235
9940	317.219	1	0	1	0	0	0	0.0211305
9942	317.252	1	0	1	0	0	0	0.0211708
9944	317.285	1	0	1	0	0	0	0.0214735
9946	317.319	1	0	1	0	0	0	0.0215025
9948	317.352	1	0	1	0	0	0	0.0213043
9950	317.385	1	0	1	0	0	0	0.021327
9952	317.419	1	0	1	0	0	0	0.0212037
9954	317.452	1	0	1	0	0	0	0.0212668
9956	317.485	1	0	1	0	0	0	0.0213804
9958	317.519	1	0	1	0	0	0	0.0215201
9960	317.552	1	0	1	0	0	0	0.0215945
9962	317.585	1	0	1	0	0	0	0.0215201
9964	317.619	1	0	1	0	0	0	0.021444
9966	317.652	1	0	1	0	0	0	0.0213946
9968	317.685	1	0	1	0	0	0	0.0212458
9970	317.719	1	0	1	0	0	0	0.021323
9972	317.752	1	0	1	0	0	0	0.0214627
9974	317.785	1	0	1	0	0	0	0.0214633
9976	317.819	1	0	1	0	0	0	0.0213667
9978	317.852	1	0	1	0	0	0	0.0211174
9980	317.885	1	0	1	0	0	0	0.021143
9982	317.919	1	0	1	0	0	0	0.0211555
9984	317.952	1	0	1	0	0	0	0.0213503
9986	317.985	1	0	1	0	0	0	0.0214372
9988	318.019	1	0	1	0	0	0	0.0215138
9990	318.052	1	0	1	0	0	0	0.0213054
9992	318.085	1	0	1	0	0	0	0.0211623
9994	318.119	1	0	1	0	0	0	0.0210873
9996	318.152	1	0	1	0	0	0	0.0211657
9998	318.185	1	0	1	0	0	0	0.0212849
10000	318.219	1	0	1	0	0	0	0.0214076
10002	318.252	1	0	1	0	0	0	0.0213531
10004	318.285	1	0	1	0	0	0	0.0212901
10006	318.319	1	0	1	0	0	0	0.0211719
10008	318.352	1	0	1	0	0	0	0.0211918
10010	318.385	1	0	1	0	0	0	0.0212259
10012	318.419	1	0	1	0	0	0	0.021386
10014	318.452	1	0	1	0	0	0	0.0213145
10016	318.485	1	0	1	0	0	0	0.0212151
10018	318.519	1	0	1	0	0	0	0.0213429
10020	318.552	1	0	1	0	0	0	0.0213883
10022	318.585	1	0	1	0	0	0	0.0213508
10024	318.619	1	0	1	0	0	0	0.0213923
10026	318.652	1	0	1	0	0	0	0.0215087
10028	318.685	1	0	1	0	0	0	0.0215189
10030	318.719	1	0	1	0	0	0	0.02149
10032	318.752	1	0	1	0	0	0	0.0214565
10034	318.785	1	0	1	0	0	0	0.0214627
10036	318.819	1	0	1	0	0	0	0.0215468
10038	318.852	1	0	1	0	0	0	0.0215292
10040	318.885	1	0	1	0	0	0	0.0214792
10042	318.919	1	0	1	0	0	0	0.0215172
10044	318.952	1	0	1	0	0	0	0.0215837
10046	318.985	1	0	1	0	0	0	0.0215394
10048	319.019	1	0	1	0	0	0	0.0215632
10050	319.052	1	0	1	0	0	0	0.0215036
10052	319.085	1	0	1	0	0	0	0.0212952
10054	319.119	1	0	1	0	0	0	0.021177
10056	319.152	1	0	1	0	0	0	0.0213099
10058	319.185	1	0	1	0	0	0	0.0215689
10060	319.219	1	0	1	0	0	0	0.0216666
10062	319.252	1	0	1	0	0	0	0.0217336
10064	319.285	1	0	1	0	0	0	0.0218421
10066	319.319	1	0	1	0	0	0	0.0217978
10068	319.352	1	0	1	0	0	0	0.0218574
10070	319.385	1	0	1	0	0	0	0.0216473
10072	319.419	1	0	1	0	0	0	0.0214508
10074	319.452	1	0	1	0	0	0	0.0215831
10076	319.485	1	0	1	0	0	0	0.0214763
10078	319.518	1	0	1	0	0	0	0.0214377
10080	319.552	1	0	1	0	0	0	0.0213911
10082	319.585	1	0	1	0	0	0	0.0214758
10084	319.618	1	0	1	0	0	0	0.0214871
10086	319.652	1	0	1	0	0	0	0.0214792
10088	319.685	1	0	1	0	0	0	0.0214337
10090	319.718	1	0	1	0	0	0	0.021315
10092	319.752	1	0	1	0	0	0	0.0215178
10094	319.785	1	0	1	0	0	0	0.0214803
10096	319.818	1	0	1	0	0	0	0.0214655
10098	319.852	1	0	1	0	0	0	0.0214366
10100	319.885	1	0	1	0	0	0	0.0215672
10102	319.918	1	0	1	0	0	0	0.0215746
10104	319.952	1	0	1	0	0	0	0.0215087
10106	319.985	1	0	1	0	0	0	0.0214349
10108	320.018	1	0	1	0	0	0	0.0214451
10110	320.052	1	0	1	0	0	0	0.0213798
10112	320.085	1	0	1	0	0	0	0.021465
10114	320.118	1	0	1	0	0	0	0.0215541
10116	320.152	1	0	1	0	0	0	0.021532
10118	320.185	1	0	1	0	0	0	0.021762
10120	320.218	1	0	1	0	0	0	0.0215496
10122	320.252	1	0	1	0	0	0	0.0215417
10124	320.285	1	0	1	0	0	0	0.0216337
10126	320.318	1	0	1	0	0	0	0.0215473
10128	320.352	1	0	1	0	0	0	0.0216467
10130	320.385	1	0	1	0	0	0	0.0216581
10132	320.418	1	0	1	0	0	0	0.0215939
10134	320.452	1	0	1	0	0	0	0.0217223
10136	320.485	1	0	1	0	0	0	0.0218165
10138	320.518	1	0	1	0	0	0	0.021833
10140	320.552	1	0	1	0	0	0	0.0217035
10142	320.585	1	0	1	0	0	0	0.021415
10144	320.618	1	0	1	0	0	0	0.0214053
10146	320.652	1	0	1	0	0	0	0.0212889
10148	320.685	1	0	1	0	0	0	0.0213707
10150	320.718	1	0	1	0	0	0	0.0214485
10152	320.752	1	0	1	0	0	0	0.0213508
10154	320.785	1	0	1	0	0	0	0.0215417
10156	320.818	1	0	1	0	0	0	0.0217677
10158	320.852	1	0	1	0	0	0	0.0216814
10160	320.885	1	0	1	0	0	0	0.0217592
10162	320.918	1	0	1	0	0	0	0.0221874
10164	320.952	1	0	1	0	0	0	0.0221124
10166	320.985	1	0	1	0	0	0	0.021854
10168	321.018	1	0	1	0	0	0	0.0217955
10170	321.052	1	0	1	0	0	0	0.0219085
10172	321.085	1	0	1	0	0	0	0.0220039
10174	321.118	1	0	1	0	0	0	0.0219784
10176	321.152	1	0	1	0	0	0	0.0218625
10178	321.185	1	0	1	0	0	0	0.0216206
10180	321.218	1	0	1	0	0	0	0.0217779
10182	321.252	1	0	1	0	0	0	0.0219477
10184	321.285	1	0	1	0	0	0	0.0219341
10186	321.318	1	0	1	0	0	0	0.0218427
10188	321.352	1	0	1	0	0	0	0.0217654
10190	321.385	1	0	1	0	0	0	0.0220267
10192	321.418	1	0	1	0	0	0	0.0221641
10194	321.452	1	0	1	0	0	0	0.0222771
10196	321.485	1	0	1	0	0	0	0.0223913
10198	321.518	1	0	1	0	0	0	0.0222839
10200	321.552	1	0	1	0	0	0	0.0222266
10202	321.585	1	0	1	0	0	0	0.0221999
10204	321.618	1	0	1	0	0	0	0.0219704
10206	321.652	1	0	1	0	0	0	0.0217762
10208	321.685	1	0	1	0	0	0	0.0218415
10210	321.718	1	0	1	0	0	0	0.0217404
10212	321.752	1	0	1	0	0	0	0.0217143
10214	321.785	1	0	1	0	0	0	0.0217001
10216	321.818	1	0	1	0	0	0	0.0217012
10218	321.852	1	0	1	0	0	0	0.0215439
10220	321.885	1	0	1	0	0	0	0.0213417
10222	321.918	1	0	1	0	0	0	0.0212588
10224	321.952	1	0	1	0	0	0	0.021298
10226	321.985	1	0	1	0	0	0	0.0212884
10228	322.018	1	0	1	0	0	0	0.0215161
10230	322.052	1	0	1	0	0	0	0.0216223
10232	322.085	1	0	1	0	0	0	0.0214832
10234	322.118	1	0	1	0	0	0	0.0212969
10236	322.152	1	0	1	0	0	0	0.0213167
10238	322.185	1	0	1	0	0	0	0.0213179
10240	322.218	1	0	1	0	0	0	0.0214309
10242	322.252	1	0	1	0	0	0	0.0214377
10244	322.285	1	0	1	0	0	0	0.0214161
10246	322.318	1	0	1	0	0	0	0.0213559
10248	322.352	1	0	1	0	0	0	0.0213309
10250	322.385	1	0	1	0	0	0	0.0212736
10252	322.418	1	0	1	0	0	0	0.0213542
10254	322.452	1	0	1	0	0	0	0.021469
10256	322.485	1	0	1	0	0	0	0.0213707
10258	322.518	1	0	1	0	0	0	0.0212162
10260	322.552	1	0	1	0	0	0	0.0213292
10262	322.585	1	0	1	0	0	0	0.0213383
10264	322.618	1	0	1	0	0	0	0.0214877
10266	322.652	1	0	1	0	0	0	0.0214922
10268	322.685	1	0	1	0	0	0	0.021624
10270	322.718	1	0	1	0	0	0	0.0216933
10272	322.752	1	0	1	0	0	0	0.0216819
10274	322.785	1	0	1	0	0	0	0.0215615
10276	322.818	1	0	1	0	0	0	0.0215002
10278	322.852	1	0	1	0	0	0	0.0214974
10280	322.885	1	0	1	0	0	0	0.0217103
10282	322.918	1	0	1	0	0	0	0.0216632
10284	322.952	1	0	1	0	0	0	0.0215133
10286	322.985	1	0	1	0	0	0	0.0211793
10288	323.018	1	0	1	0	0	0	0.0210748
10290	323.052	1	0	1	0	0	0	0.0210237
10292	323.085	1	0	1	0	0	0	0.021051
10294	323.118	1	0	1	0	0	0	0.0211765
10296	323.152	1	0	1	0	0	0	0.0213014
10298	323.185	1	0	1	0	0	0	0.0214991
10300	323.218	1	0	1	0	0	0	0.0214883
10302	323.252	1	0	1	0	0	0	0.0213826
10304	323.285	1	0	1	0	0	0	0.0212855
10306	323.318	1	0	1	0	0	0	0.021281
10308	323.352	1	0	1	0	0	0	0.0213287
10310	323.385	1	0	1	0	0	0	0.0213196
10312	323.418	1	0	1	0	0	0	0.0212679
10314	323.452	1	0	1	0	0	0	0.0212872
10316	323.485	1	0	1	0	0	0	0.0213082
10318	323.518	1	0	1	0	0	0	0.0213628
10320	323.552	1	0	1	0	0	0	0.0212219
10322	323.585	1	0	1	0	0	0	0.0212588
10324	323.618	1	0	1	0	0	0	0.0212849
10326	323.652	1	0	1	0	0	0	0.0213003
10328	323.685	1	0	1	0	0	0	0.0214337
10330	323.718	1	0	1	0	0	0	0.021377
10332	323.752	1	0	1	0	0	0	0.0214849
10334	323.785	1	0	1	0	0	0	0.021624
10336	323.818	1	0	1	0	0	0	0.0216024
10338	323.852	1	0	1	0	0	0	0.0215008
10340	323.885	1	0	1	0	0	0	0.021461
10342	323.918	1	0	1	0	0	0	0.0215837
10344	323.952	1	0	1	0	0	0	0.0218023
10346	323.985	1	0	1	0	0	0	0.0217518
10348	324.018	1	0	1	0	0	0	0.0217688
10350	324.052	1	0	1	0	0	0	0.0217461
10352	324.085	1	0	1	0	0	0	0.0216132
10354	324.118	1	0	1	0	0	0	0.0217365
10356	324.152	1	0	1	0	0	0	0.0217001
10358	324.185	1	0	1	0	0	0	0.0216683
10360	324.218	1	0	1	0	0	0	0.0215956
10362	324.252	1	0	1	0	0	0	0.0214065
10364	324.285	1	0	1	0	0	0	0.0214303
10366	324.318	1	0	1	0	0	0	0.0215576
10368	324.352	1	0	1	0	0	0	0.0217075
10370	324.385	1	0	1	0	0	0	0.0217262
10372	324.418	1	0	1	0	0	0	0.0217688
10374	324.452	1	0	1	0	0	0	0.0218449
10376	324.485	1	0	1	0	0	0	0.0217631
10378	324.518	1	0	1	0	0	0	0.0218137
10380	324.552	1	0	1	0	0	0	0.0216956
10382	324.585	1	0	1	0	0	0	0.0216581
10384	324.618	1	0	1	0	0	0	0.0216797
10386	324.652	1	0	1	0	0	0	0.0217404
10388	324.685	1	0	1	0	0	0	0.0218654
10390	324.718	1	0	1	0	0	0	0.0218745
10392	324.752	1	0	1	0	0	0	0.021808
10394	324.785	1	0	1	0	0	0	0.0217864
10396	324.818	1	0	1	0	0	0	0.0218415
10398	324.852	1	0	1	0	0	0	0.0218892
10400	324.885	1	0	1	0	0	0	0.021971
10402	324.918	1	0	1	0	0	0	0.0218256
10404	324.952	1	0	1	0	0	0	0.0218852
10406	324.985	1	0	1	0	0	0	0.021979
10408	325.018	1	0	1	0	0	0	0.0220278
10410	325.052	1	0	1	0	0	0	0.0219466
10412	325.085	1	0	1	0	0	0	0.0218069
10414	325.118	1	0	1	0	0	0	0.0218126
10416	325.152	1	0	1	0	0	0	0.0218279
10418	325.185	1	0	1	0	0	0	0.0218489
10420	325.218	1	0	1	0	0	0	0.0218506
10422	325.252	1	0	1	0	0	0	0.0217978
10424	325.285	1	0	1	0	0	0	0.0218313
10426	325.318	1	0	1	0	0	0	0.0217081
10428	325.352	1	0	1	0	0	0	0.0215763
10430	325.385	1	0	1	0	0	0	0.0215598
10432	325.418	1	0	1	0	0	0	0.0215229
10434	325.452	1	0	1	0	0	0	0.0215116
10436	325.485	1	0	1	0	0	0	0.0214474
10438	325.518	1	0	1	0	0	0	0.0214934
10440	325.552	1	0	1	0	0	0	0.0214184
10442	325.585	1	0	1	0	0	0	0.0213128
10444	325.618	1	0	1	0	0	0	0.0213849
10446	325.652	1	0	1	0	0	0	0.0213156
10448	325.685	1	0	1	0	0	0	0.0214127
10450	325.718	1	0	1	0	0	0	0.0213372
10452	325.752	1	0	1	0	0	0	0.0212537
10454	325.785	1	0	1	0	0	0	0.0213775
10456	325.818	1	0	1	0	0	0	0.0215763
10458	325.852	1	0	1	0	0	0	0.0216916
10460	325.885	1	0	1	0	0	0	0.0216274
10462	325.918	1	0	1	0	0	0	0.0217569
10464	325.952	1	0	1	0	0	0	0.0216513
10466	325.985	1	0	1	0	0	0	0.0214428
10468	326.018	1	0	1	0	0	0	0.021436
10470	326.052	1	0	1	0	0	0	0.0213911
10472	326.085	1	0	1	0	0	0	0.0213026
10474	326.118	1	0	1	0	0	0	0.021223
10476	326.152	1	0	1	0	0	0	0.0214735
10478	326.185	1	0	1	0	0	0	0.0216075
10480	326.218	1	0	1	0	0	0	0.0216291
10482	326.252	1	0	1	0	0	0	0.0216166
10484	326.285	1	0	1	0	0	0	0.0216689
10486	326.318	1	0	1	0	0	0	0.021678
10488	326.352	1	0	1	0	0	0	0.0215354
10490	326.385	1	0	1	0	0	0	0.0213906
10492	326.418	1	0	1	0	0	0	0.0215093
10494	326.452	1	0	1	0	0	0	0.0216132
10496	326.485	1	0	1	0	0	0	0.0215848
10498	326.518	1	0	1	0	0	0	0.0213832
10500	326.552	1	0	1	0	0	0	0.0212401
10502	326.585	1	0	1	0	0	0	0.0212367
10504	326.618	1	0	1	0	0	0	0.0213315
10506	326.652	1	0	1	0	0	0	0.0212742
10508	326.685	1	0	1	0	0	0	0.0211049
10510	326.718	1	0	1	0	0	0	0.0210351
10512	326.752	1	0	1	0	0	0	0.0211856
10514	326.785	1	0	1	0	0	0	0.0215133
10516	326.818	1	0	1	0	0	0	0.0215286
10518	326.852	1	0	1	0	0	0	0.0213361
10520	326.885	1	0	1	0	0	0	0.0213105
10522	326.918	1	0	1	0	0	0	0.0212105
10524	326.952	1	0	1	0	0	0	0.02149
10526	326.985	1	0	1	0	0	0	0.0215911
10528	327.018	1	0	1	0	0	0	0.0215138
10530	327.052	1	0	1	0	0	0	0.0216462
10532	327.085	1	0	1	0	0	0	0.0214326
10534	327.118	1	0	1	0	0	0	0.0213662
10536	327.152	1	0	1	0	0	0	0.0213696
10538	327.185	1	0	1	0	0	0	0.0213645
10540	327.218	1	0	1	0	0	0	0.0213571
10542	327.252	1	0	1	0	0	0	0.0212026
10544	327.285	1	0	1	0	0	0	0.0212401
10546	327.318	1	0	1	0	0	0	0.0215314
10548	327.352	1	0	1	0	0	0	0.0217171
10550	327.385	1	0	1	0	0	0	0.0216916
10552	327.418	1	0	1	0	0	0	0.0216234
10554	327.452	1	0	1	0	0	0	0.0215928
10556	327.485	1	0	1	0	0	0	0.0216274
10558	327.518	1	0	1	0	0	0	0.0215865
10560	327.552	1	0	1	0	0	0	0.0215053
10562	327.585	1	0	1	0	0	0	0.0213048
10564	327.618	1	0	1	0	0	0	0.021273
10566	327.652	1	0	1	0	0	0	0.0212736
10568	327.685	1	0	1	0	0	0	0.0213264
10570	327.718	1	0	1	0	0	0	0.0212929
10572	327.752	1	0	1	0	0	0	0.0213469
10574	327.785	1	0	1	0	0	0	0.0214394
10576	327.818	1	0	1	0	0	0	0.0215894
10578	327.852	1	0	1	0	0	0	0.0216524
10580	327.885	1	0	1	0	0	0	0.0216518
10582	327.918	1	0	1	0	0	0	0.0214582
10584	327.952	1	0	1	0	0	0	0.0214315
10586	327.985	1	0	1	0	0	0	0.0216098
10588	328.018	1	0	1	0	0	0	0.0216513
10590	328.051	1	0	1	0	0	0	0.021628
10592	328.085	1	0	1	0	0	0	0.0214928
10594	328.118	1	0	1	0	0	0	0.0214939
10596	328.151	1	0	1	0	0	0	0.0216956
10598	328.185	1	0	1	0	0	0	0.0218824
10600	328.218	1	0	1	0	0	0	0.0218659
10602	328.251	1	0	1	0	0	0	0.021762
10604	328.285	1	0	1	0	0	0	0.0216802
10606	328.318	1	0	1	0	0	0	0.0217416
10608	328.351	1	0	1	0	0	0	0.0216717
10610	328.385	1	0	1	0	0	0	0.0216365
10612	328.418	1	0	1	0	0	0	0.0216876
10614	328.451	1	0	1	0	0	0	0.0216337
10616	328.485	1	0	1	0	0	0	0.0217069
10618	328.518	1	0	1	0	0	0	0.0216922
10620	328.551	1	0	1	0	0	0	0.0217177
10622	328.585	1	0	1	0	0	0	0.0217921
10624	328.618	1	0	1	0	0	0	0.0216564
10626	328.651	1	0	1	0	0	0	0.0216609
10628	328.685	1	0	1	0	0	0	0.0218143
10630	328.718	1	0	1	0	0	0	0.0218336
10632	328.751	1	0	1	0	0	0	0.0217291
10634	328.785	1	0	1	0	0	0	0.0217404
10636	328.818	1	0	1	0	0	0	0.021716
10638	328.851	1	0	1	0	0	0	0.0216586
10640	328.885	1	0	1	0	0	0	0.0217046
10642	328.918	1	0	1	0	0	0	0.0217268
10644	328.951	1	0	1	0	0	0	0.0217081
10646	328.985	1	0	1	0	0	0	0.0217711
10648	329.018	1	0	1	0	0	0	0.0216893
10650	329.051	1	0	1	0	0	0	0.0216706
10652	329.085	1	0	1	0	0	0	0.0216916
10654	329.118	1	0	1	0	0	0	0.0219392
10656	329.151	1	0	1	0	0	0	0.0220306
10658	329.185	1	0	1	0	0	0	0.0218313
10660	329.218	1	0	1	0	0	0	0.0218739
10662	329.251	1	0	1	0	0	0	0.021812
10664	329.285	1	0	1	0	0	0	0.0218182
10666	329.318	1	0	1	0	0	0	0.0218989
10668	329.351	1	0	1	0	0	0	0.0218852
10670	329.385	1	0	1	0	0	0	0.0218665
10672	329.418	1	0	1	0	0	0	0.021812
10674	329.451	1	0	1	0	0	0	0.0217279
10676	329.485	1	0	1	0	0	0	0.0217558
10678	329.518	1	0	1	0	0	0	0.0217671
10680	329.551	1	0	1	0	0	0	0.0218001
10682	329.585	1	0	1	0	0	0	0.0218154
10684	329.618	1	0	1	0	0	0	0.021515
10686	329.651	1	0	1	0	0	0	0.0213429
10688	329.685	1	0	1	0	0	0	0.02134
10690	329.718	1	0	1	0	0	0	0.0214945
10692	329.751	1	0	1	0	0	0	0.0214019
10694	329.785	1	0	1	0	0	0	0.0214014
10696	329.818	1	0	1	0	0	0	0.0213383
10698	329.851	1	0	1	0	0	0	0.0213622
10700	329.885	1	0	1	0	0	0	0.0213877
10702	329.918	1	0	1	0	0	0	0.0215377
10704	329.951	1	0	1	0	0	0	0.0216763
10706	329.985	1	0	1	0	0	0	0.0216728
10708	330.018	1	0	1	0	0	0	0.0216638
10710	330.051	1	0	1	0	0	0	0.02167
10712	330.085	1	0	1	0	0	0	0.0216547
10714	330.118	1	0	1	0	0	0	0.0218182
10716	330.151	1	0	1	0	0	0	0.0219318
10718	330.185	1	0	1	0	0	0	0.0217018
10720	330.218	1	0	1	0	0	0	0.0217143
10722	330.251	1	0	1	0	0	0	0.0218262
10724	330.285	1	0	1	0	0	0	0.0218461
10726	330.318	1	0	1	0	0	0	0.0217893
10728	330.351	1	0	1	0	0	0	0.0218029
10730	330.385	1	0	1	0	0	0	0.0218091
10732	330.418	1	0	1	0	0	0	0.0219165
10734	330.451	1	0	1	0	0	0	0.0218574
10736	330.485	1	0	1	0	0	0	0.0218716
10738	330.518	1	0	1	0	0	0	0.0218977
10740	330.551	1	0	1	0	0	0	0.021858
10742	330.585	1	0	1	0	0	0	0.0220255
10744	330.618	1	0	1	0	0	0	0.0218273
10746	330.651	1	0	1	0	0	0	0.0217575
10748	330.685	1	0	1	0	0	0	0.0217637
10750	330.718	1	0	1	0	0	0	0.0219131
10752	330.751	1	0	1	0	0	0	0.0220897
10754	330.785	1	0	1	0	0	0	0.0221845
10756	330.818	1	0	1	0	0	0	0.0220323
10758	330.851	1	0	1	0	0	0	0.0219432
10760	330.885	1	0	1	0	0	0	0.0218591
10762	330.918	1	0	1	0	0	0	0.0218097
10764	330.951	1	0	1	0	0	0	0.0217342
10766	330.985	1	0	1	0	0	0	0.0218001
10768	331.018	1	0	1	0	0	0	0.0218728
10770	331.051	1	0	1	0	0	0	0.0216956
10772	331.085	1	0	1	0	0	0	0.0217098
10774	331.118	1	0	1	0	0	0	0.0216649
10776	331.151	1	0	1	0	0	0	0.0217029
10778	331.185	1	0	1	0	0	0	0.0218858
10780	331.218	1	0	1	0	0	0	0.0218375
10782	331.251	1	0	1	0	0	0	0.0218211
10784	331.285	1	0	1	0	0	0	0.0216058
10786	331.318	1	0	1	0	0	0	0.0216802
10788	331.351	1	0	1	0	0	0	0.0217455
10790	331.385	1	0	1	0	0	0	0.0218693
10792	331.418	1	0	1	0	0	0	0.0218767
10794	331.451	1	0	1	0	0	0	0.0218171
10796	331.485	1	0	1	0	0	0	0.0217524
10798	331.518	1	0	1	0	0	0	0.0218057
10800	331.551	1	0	1	0	0	0	0.021879
10802	331.585	1	0	1	0	0	0	0.0219375
10804	331.618	1	0	1	0	0	0	0.0219068
10806	331.651	1	0	1	0	0	0	0.0218143
10808	331.685	1	0	1	0	0	0	0.0218841
10810	331.718	1	0	1	0	0	0	0.0217876
10812	331.751	1	0	1	0	0	0	0.0218211
10814	331.785	1	0	1	0	0	0	0.0218671
10816	331.818	1	0	1	0	0	0	0.0218455
10818	331.851	1	0	1	0	0	0	0.021678
10820	331.885	1	0	1	0	0	0	0.0215865
10822	331.918	1	0	1	0	0	0	0.0215047
10824	331.951	1	0	1	0	0	0	0.0215945
10826	331.985	1	0	1	0	0	0	0.0217171
10828	332.018	1	0	1	0	0	0	0.0217967
10830	332.051	1	0	1	0	0	0	0.0218784
10832	332.085	1	0	1	0	0	0	0.0219506
10834	332.118	1	0	1	0	0	0	0.0219631
10836	332.151	1	0	1	0	0	0	0.021946
10838	332.185	1	0	1	0	0	0	0.0219517
10840	332.218	1	0	1	0	0	0	0.0219261
10842	332.251	1	0	1	0	0	0	0.0217489
10844	332.285	1	0	1	0	0	0	0.0217149
10846	332.318	1	0	1	0	0	0	0.0217154
10848	332.351	1	0	1	0	0	0	0.0216149
10850	332.385	1	0	1	0	0	0	0.0215712
10852	332.418	1	0	1	0	0	0	0.0216206
10854	332.451	1	0	1	0	0	0	0.0216575
10856	332.485	1	0	1	0	0	0	0.0216297
10858	332.518	1	0	1	0	0	0	0.0217018
10860	332.551	1	0	1	0	0	0	0.0217575
10862	332.585	1	0	1	0	0	0	0.0214457
10864	332.618	1	0	1	0	0	0	0.021327
10866	332.651	1	0	1	0	0	0	0.0214212
10868	332.685	1	0	1	0	0	0	0.0216371
10870	332.718	1	0	1	0	0	0	0.0216427
10872	332.751	1	0	1	0	0	0	0.0212963
10874	332.785	1	0	1	0	0	0	0.0210646
10876	332.818	1	0	1	0	0	0	0.0210464
10878	332.851	1	0	1	0	0	0	0.0211225
10880	332.885	1	0	1	0	0	0	0.0212264
10882	332.918	1	0	1	0	0	0	0.0213281
10884	332.951	1	0	1	0	0	0	0.0215695
10886	332.985	1	0	1	0	0	0	0.0215076
10888	333.018	1	0	1	0	0	0	0.0213838
10890	333.051	1	0	1	0	0	0	0.0213911
10892	333.085	1	0	1	0	0	0	0.0213105
10894	333.118	1	0	1	0	0	0	0.0214156
10896	333.151	1	0	1	0	0	0	0.0215167
10898	333.185	1	0	1	0	0	0	0.0214877
10900	333.218	1	0	1	0	0	0	0.0214451
10902	333.251	1	0	1	0	0	0	0.0213855
10904	333.285	1	0	1	0	0	0	0.0214922
10906	333.318	1	0	1	0	0	0	0.0216456
10908	333.351	1	0	1	0	0	0	0.0214241
10910	333.385	1	0	1	0	0	0	0.0213787
10912	333.418	1	0	1	0	0	0	0.0211969
10914	333.451	1	0	1	0	0	0	0.0211776
10916	333.485	1	0	1	0	0	0	0.0212418
10918	333.518	1	0	1	0	0	0	0.0214326
10920	333.551	1	0	1	0	0	0	0.0215326
10922	333.585	1	0	1	0	0	0	0.0215462
10924	333.618	1	0	1	0	0	0	0.0215558
10926	333.651	1	0	1	0	0	0	0.0216007
10928	333.685	1	0	1	0	0	0	0.0216001
10930	333.718	1	0	1	0	0	0	0.0216053
10932	333.751	1	0	1	0	0	0	0.0216416
10934	333.785	1	0	1	0	0	0	0.0215877
10936	333.818	1	0	1	0	0	0	0.0215956
10938	333.851	1	0	1	0	0	0	0.021478
10940	333.885	1	0	1	0	0	0	0.0212821
10942	333.918	1	0	1	0	0	0	0.0212123
10944	333.951	1	0	1	0	0	0	0.0211941
10946	333.985	1	0	1	0	0	0	0.0212225
10948	334.018	1	0	1	0	0	0	0.0212503
10950	334.051	1	0	1	0	0	0	0.0213474
10952	334.085	1	0	1	0	0	0	0.0213372
10954	334.118	1	0	1	0	0	0	0.021302
10956	334.151	1	0	1	0	0	0	0.0212543
10958	334.185	1	0	1	0	0	0	0.02126
10960	334.218	1	0	1	0	0	0	0.0214048
10962	334.251	1	0	1	0	0	0	0.0214553
10964	334.285	1	0	1	0	0	0	0.0213843
10966	334.318	1	0	1	0	0	0	0.0213514
10968	334.351	1	0	1	0	0	0	0.0212111
10970	334.385	1	0	1	0	0	0	0.0212185
10972	334.418	1	0	1	0	0	0	0.0212196
10974	334.451	1	0	1	0	0	0	0.0212548
10976	334.485	1	0	1	0	0	0	0.0215468
10978	334.518	1	0	1	0	0	0	0.0215382
10980	334.551	1	0	1	0	0	0	0.0215984
10982	334.585	1	0	1	0	0	0	0.0215133
10984	334.618	1	0	1	0	0	0	0.0215825
10986	334.651	1	0	1	0	0	0	0.0215394
10988	334.685	1	0	1	0	0	0	0.021436
10990	334.718	1	0	1	0	0	0	0.0214048
10992	334.751	1	0	1	0	0	0	0.021377
10994	334.785	1	0	1	0	0	0	0.021528
10996	334.818	1	0	1	0	0	0	0.0215882
10998	334.851	1	0	1	0	0	0	0.0215519
11000	334.885	1	0	1	0	0	0	0.0215377
11002	334.918	1	0	1	0	0	0	0.0216183
11004	334.951	1	0	1	0	0	0	0.0215928
11006	334.985	1	0	1	0	0	0	0.0216087
11008	335.018	1	0	1	0	0	0	0.0215973
11010	335.051	1	0	1	0	0	0	0.0216013
11012	335.085	1	0	1	0	0	0	0.0217569
11014	335.118	1	0	1	0	0	0	0.0216706
11016	335.151	1	0	1	0	0	0	0.0216609
11018	335.185	1	0	1	0	0	0	0.0217393
11020	335.218	1	0	1	0	0	0	0.0216189
11022	335.251	1	0	1	0	0	0	0.0217126
11024	335.285	1	0	1	0	0	0	0.0216081
11026	335.318	1	0	1	0	0	0	0.0215541
11028	335.351	1	0	1	0	0	0	0.0215655
11030	335.385	1	0	1	0	0	0	0.0215803
11032	335.418	1	0	1	0	0	0	0.0214712
11034	335.451	1	0	1	0	0	0	0.0213077
11036	335.485	1	0	1	0	0	0	0.0213417
11038	335.518	1	0	1	0	0	0	0.0211958
11040	335.551	1	0	1	0	0	0	0.0210441
11042	335.585	1	0	1	0	0	0	0.0208953
11044	335.618	1	0	1	0	0	0	0.0208232
11046	335.651	1	0	1	0	0	0	0.0210334
11048	335.685	1	0	1	0	0	0	0.0212548
11050	335.718	1	0	1	0	0	0	0.021478
11052	335.751	1	0	1	0	0	0	0.02144
11054	335.785	1	0	1	0	0	0	0.0215473
11056	335.818	1	0	1	0	0	0	0.0214428
11058	335.851	1	0	1	0	0	0	0.0213463
11060	335.885	1	0	1	0	0	0	0.0213309
11062	335.918	1	0	1	0	0	0	0.0214252
11064	335.951	1	0	1	0	0	0	0.0215252
11066	335.985	1	0	1	0	0	0	0.0215093
11068	336.018	1	0	1	0	0	0	0.0214917
11070	336.051	1	0	1	0	0	0	0.0213315
11072	336.085	1	0	1	0	0	0	0.0214423
11074	336.118	1	0	1	0	0	0	0.0215996
11076	336.151	1	0	1	0	0	0	0.0215797
11078	336.185	1	0	1	0	0	0	0.021478
11080	336.218	1	0	1	0	0	0	0.021344
11082	336.251	1	0	1	0	0	0	0.0212787
11084	336.285	1	0	1	0	0	0	0.0214752
11086	336.318	1	0	1	0	0	0	0.021553
11088	336.351	1	0	1	0	0	0	0.0215275
11090	336.385	1	0	1	0	0	0	0.0214207
11092	336.418	1	0	1	0	0	0	0.0214127
11094	336.451	1	0	1	0	0	0	0.0215138
11096	336.485	1	0	1	0	0	0	0.0215138
11098	336.518	1	0	1	0	0	0	0.0214735
11100	336.551	1	0	1	0	0	0	0.0215877
11102	336.584	1	0	1	0	0	0	0.0215689
11104	336.618	1	0	1	0	0	0	0.0217018
11106	336.651	1	0	1	0	0	0	0.021674
11108	336.684	1	0	1	0	0	0	0.0217251
11110	336.718	1	0	1	0	0	0	0.0216615
11112	336.751	1	0	1	0	0	0	0.0215053
11114	336.784	1	0	1	0	0	0	0.0213724
11116	336.818	1	0	1	0	0	0	0.0214088
11118	336.851	1	0	1	0	0	0	0.0213275
11120	336.884	1	0	1	0	0	0	0.0213537
11122	336.918	1	0	1	0	0	0	0.021461
11124	336.951	1	0	1	0	0	0	0.0216195
11126	336.984	1	0	1	0	0	0	0.0215865
11128	337.018	1	0	1	0	0	0	0.0214911
11130	337.051	1	0	1	0	0	0	0.0213929
11132	337.084	1	0	1	0	0	0	0.0214139
11134	337.118	1	0	1	0	0	0	0.0216677
11136	337.151	1	0	1	0	0	0	0.0217245
11138	337.184	1	0	1	0	0	0	0.0217245
11140	337.218	1	0	1	0	0	0	0.0217893
11142	337.251	1	0	1	0	0	0	0.0217524
11144	337.284	1	0	1	0	0	0	0.0218109
11146	337.318	1	0	1	0	0	0	0.0218671
11148	337.351	1	0	1	0	0	0	0.0219335
11150	337.384	1	0	1	0	0	0	0.0221476
11152	337.418	1	0	1	0	0	0	0.0222368
11154	337.451	1	0	1	0	0	0	0.0221488
11156	337.484	1	0	1	0	0	0	0.0222215
11158	337.518	1	0	1	0	0	0	0.0221624
11160	337.551	1	0	1	0	0	0	0.0221624
11162	337.584	1	0	1	0	0	0	0.0221187
11164	337.618	1	0	1	0	0	0	0.022109
11166	337.651	1	0	1	0	0	0	0.0221675
11168	337.684	1	0	1	0	0	0	0.0221153
11170	337.718	1	0	1	0	0	0	0.0220891
11172	337.751	1	0	1	0	0	0	0.0220846
11174	337.784	1	0	1	0	0	0	0.0220676
11176	337.818	1	0	1	0	0	0	0.0221624
11178	337.851	1	0	1	0	0	0	0.0221295
11180	337.884	1	0	1	0	0	0	0.0219426
11182	337.918	1	0	1	0	0	0	0.0219131
11184	337.951	1	0	1	0	0	0	0.0217751
11186	337.984	1	0	1	0	0	0	0.021741
11188	338.018	1	0	1	0	0	0	0.0217347
11190	338.051	1	0	1	0	0	0	0.0217677
11192	338.084	1	0	1	0	0	0	0.0217245
11194	338.118	1	0	1	0	0	0	0.0217086
11196	338.151	1	0	1	0	0	0	0.0216376
11198	338.184	1	0	1	0	0	0	0.0215996
11200	338.218	1	0	1	0	0	0	0.0215036
11202	338.251	1	0	1	0	0	0	0.0215507
11204	338.284	1	0	1	0	0	0	0.0215428
11206	338.318	1	0	1	0	0	0	0.0216075
11208	338.351	1	0	1	0	0	0	0.0217217
11210	338.384	1	0	1	0	0	0	0.0216887
11212	338.418	1	0	1	0	0	0	0.021653
11214	338.451	1	0	1	0	0	0	0.0215581
11216	338.484	1	0	1	0	0	0	0.0214792
11218	338.518	1	0	1	0	0	0	0.0214144
11220	338.551	1	0	1	0	0	0	0.0214309
11222	338.584	1	0	1	0	0	0	0.0214025
11224	338.618	1	0	1	0	0	0	0.0213389
11226	338.651	1	0	1	0	0	0	0.0212974
11228	338.684	1	0	1	0	0	0	0.021298
11230	338.718	1	0	1	0	0	0	0.02121
11232	338.751	1	0	1	0	0	0	0.0213287
11234	338.784	1	0	1	0	0	0	0.0214678
11236	338.818	1	0	1	0	0	0	0.0214076
11238	338.851	1	0	1	0	0	0	0.0213043
11240	338.884	1	0	1	0	0	0	0.0213883
11242	338.918	1	0	1	0	0	0	0.0214724
11244	338.951	1	0	1	0	0	0	0.0215462
11246	338.984	1	0	1	0	0	0	0.0215916
11248	339.018	1	0	1	0	0	0	0.0215212
11250	339.051	1	0	1	0	0	0	0.0214264
11252	339.084	1	0	1	0	0	0	0.0213923
11254	339.118	1	0	1	0	0	0	0.0214207
11256	339.151	1	0	1	0	0	0	0.0214565
11258	339.184	1	0	1	0	0	0	0.0214956
11260	339.218	1	0	1	0	0	0	0.0214366
11262	339.251	1	0	1	0	0	0	0.0214002
11264	339.284	1	0	1	0	0	0	0.0213911
11266	339.318	1	0	1	0	0	0	0.021423
11268	339.351	1	0	1	0	0	0	0.0214224
11270	339.384	1	0	1	0	0	0	0.0214269
11272	339.418	1	0	1	0	0	0	0.0215661
11274	339.451	1	0	1	0	0	0	0.0216297
11276	339.484	1	0	1	0	0	0	0.0215854
11278	339.518	1	0	1	0	0	0	0.0215899
11280	339.551	1	0	1	0	0	0	0.0215831
11282	339.584	1	0	1	0	0	0	0.0216774
11284	339.618	1	0	1	0	0	0	0.0217234
11286	339.651	1	0	1	0	0	0	0.0215644
11288	339.684	1	0	1	0	0	0	0.0216734
11290	339.718	1	0	1	0	0	0	0.0215502
11292	339.751	1	0	1	0	0	0	0.021348
11294	339.784	1	0	1	0	0	0	0.0213997
11296	339.818	1	0	1	0	0	0	0.021369
11298	339.851	1	0	1	0	0	0	0.0214252
11300	339.884	1	0	1	0	0	0	0.0214048
11302	339.918	1	0	1	0	0	0	0.0214599
11304	339.951	1	0	1	0	0	0	0.0215803
11306	339.984	1	0	1	0	0	0	0.0214462
11308	340.018	1	0	1	0	0	0	0.0215388
11310	340.051	1	0	1	0	0	0	0.0216087
11312	340.084	1	0	1	0	0	0	0.0216001
11314	340.118	1	0	1	0	0	0	0.0216433
11316	340.151	1	0	1	0	0	0	0.0215723
11318	340.184	1	0	1	0	0	0	0.0215615
11320	340.218	1	0	1	0	0	0	0.0216927
11322	340.251	1	0	1	0	0	0	0.0216297
11324	340.284	1	0	1	0	0	0	0.0215008
11326	340.318	1	0	1	0	0	0	0.0214712
11328	340.351	1	0	1	0	0	0	0.0213139
11330	340.384	1	0	1	0	0	0	0.0213571
11332	340.418	1	0	1	0	0	0	0.0214156
11334	340.451	1	0	1	0	0	0	0.0214763
11336	340.484	1	0	1	0	0	0	0.0214059
11338	340.518	1	0	1	0	0	0	0.0212696
11340	340.551	1	0	1	0	0	0	0.0211861
11342	340.584	1	0	1	0	0	0	0.0213088
11344	340.618	1	0	1	0	0	0	0.0213207
11346	340.651	1	0	1	0	0	0	0.0214758
11348	340.684	1	0	1	0	0	0	0.0214252
11350	340.718	1	0	1	0	0	0	0.021411
11352	340.751	1	0	1	0	0	0	0.0214071
11354	340.784	1	0	1	0	0	0	0.0213957
11356	340.818	1	0	1	0	0	0	0.0213798
11358	340.851	1	0	1	0	0	0	0.021511
11360	340.884	1	0	1	0	0	0	0.0214735
11362	340.918	1	0	1	0	0	0	0.0213963
11364	340.951	1	0	1	0	0	0	0.0213696
11366	340.984	1	0	1	0	0	0	0.0215121
11368	341.018	1	0	1	0	0	0	0.0214763
11370	341.051	1	0	1	0	0	0	0.0214451
11372	341.084	1	0	1	0	0	0	0.0213645
11374	341.118	1	0	1	0	0	0	0.0213094
11376	341.151	1	0	1	0	0	0	0.0215984
11378	341.184	1	0	1	0	0	0	0.021666
11380	341.218	1	0	1	0	0	0	0.0216853
11382	341.251	1	0	1	0	0	0	0.0216995
11384	341.284	1	0	1	0	0	0	0.0215598
11386	341.318	1	0	1	0	0	0	0.0214451
11388	341.351	1	0	1	0	0	0	0.0215087
11390	341.384	1	0	1	0	0	0	0.0215729
11392	341.418	1	0	1	0	0	0	0.0216354
11394	341.451	1	0	1	0	0	0	0.0214701
11396	341.484	1	0	1	0	0	0	0.0214531
11398	341.518	1	0	1	0	0	0	0.0214173
11400	341.551	1	0	1	0	0	0	0.0213389
11402	341.584	1	0	1	0	0	0	0.0215093
11404	341.618	1	0	1	0	0	0	0.021603
11406	341.651	1	0	1	0	0	0	0.0216388
11408	341.684	1	0	1	0	0	0	0.0214286
11410	341.718	1	0	1	0	0	0	0.0214071
11412	341.751	1	0	1	0	0	0	0.0215808
11414	341.784	1	0	1	0	0	0	0.0216399
11416	341.818	1	0	1	0	0	0	0.0217143
11418	341.851	1	0	1	0	0	0	0.0217234
11420	341.884	1	0	1	0	0	0	0.021674
11422	341.918	1	0	1	0	0	0	0.0216734
11424	341.951	1	0	1	0	0	0	0.021649
11426	341.984	1	0	1	0	0	0	0.0217228
[truncated: 25,157 more rows]

## Sheet: Mouse_1_470_Signal
FrameCounter	Timestamp	LedState	Stimulation	Output0	Output1	Input0	Input1	Region0G
7431	275.404	2	0	1	0	0	0	0.0354441
7433	275.437	2	0	1	0	0	0	0.0355315
7435	275.47	2	0	1	0	0	0	0.0354236
7437	275.504	2	0	1	0	0	0	0.0353231
7439	275.537	2	0	1	0	0	0	0.0349693
7441	275.57	2	0	1	0	0	0	0.0350828
7443	275.604	2	0	1	0	0	0	0.0348767
7445	275.637	2	0	1	0	0	0	0.0345689
7447	275.67	2	0	1	0	0	0	0.0347932
7449	275.704	2	0	1	0	0	0	0.0349988
7451	275.737	2	0	1	0	0	0	0.0349977
7453	275.77	2	0	1	0	0	0	0.0351368
7455	275.804	2	0	1	0	0	0	0.0352555
7457	275.837	2	0	1	0	0	0	0.0350772
7459	275.87	2	0	1	0	0	0	0.0347813
7461	275.904	2	0	1	0	0	0	0.0348102
7463	275.937	2	0	1	0	0	0	0.0348284
7465	275.97	2	0	1	0	0	0	0.0344604
7467	276.004	2	0	1	0	0	0	0.0342679
7469	276.037	2	0	1	0	0	0	0.0345462
7471	276.07	2	0	1	0	0	0	0.0347262
7473	276.104	2	0	1	0	0	0	0.0348971
7475	276.137	2	0	1	0	0	0	0.0347404
7477	276.17	2	0	1	0	0	0	0.0349488
7479	276.204	2	0	1	0	0	0	0.0351561
7481	276.237	2	0	1	0	0	0	0.0352038
7483	276.27	2	0	1	0	0	0	0.0352169
7485	276.304	2	0	1	0	0	0	0.0352617
7487	276.337	2	0	1	0	0	0	0.0352453
7489	276.37	2	0	1	0	0	0	0.0349664
7491	276.404	2	0	1	0	0	0	0.0346404
7493	276.437	2	0	1	0	0	0	0.0347427
7495	276.47	2	0	1	0	0	0	0.0346427
7497	276.504	2	0	1	0	0	0	0.034733
7499	276.537	2	0	1	0	0	0	0.0348852
7501	276.57	2	0	1	0	0	0	0.0349397
7503	276.604	2	0	1	0	0	0	0.0350249
7505	276.637	2	0	1	0	0	0	0.0349505
7507	276.67	2	0	1	0	0	0	0.0348676
7509	276.704	2	0	1	0	0	0	0.0347955
7511	276.737	2	0	1	0	0	0	0.0350516
7513	276.77	2	0	1	0	0	0	0.0351891
7515	276.804	2	0	1	0	0	0	0.0351595
7517	276.837	2	0	1	0	0	0	0.0351743
7519	276.87	2	0	1	0	0	0	0.0350868
7521	276.904	2	0	1	0	0	0	0.0350618
7523	276.937	2	0	1	0	0	0	0.0349914
7525	276.97	2	0	1	0	0	0	0.0352248
7527	277.004	2	0	1	0	0	0	0.0352044
7529	277.037	2	0	1	0	0	0	0.0351913
7531	277.07	2	0	1	0	0	0	0.0350931
7533	277.104	2	0	1	0	0	0	0.034963
7535	277.137	2	0	1	0	0	0	0.0351147
7537	277.17	2	0	1	0	0	0	0.0351953
7539	277.204	2	0	1	0	0	0	0.0352782
7541	277.237	2	0	1	0	0	0	0.0353157
7543	277.27	2	0	1	0	0	0	0.0353288
7545	277.304	2	0	1	0	0	0	0.0353907
7547	277.337	2	0	1	0	0	0	0.0356701
7549	277.37	2	0	1	0	0	0	0.0361807
7551	277.404	2	0	1	0	0	0	0.0362142
7553	277.437	2	0	1	0	0	0	0.0363124
7555	277.47	2	0	1	0	0	0	0.0366004
7557	277.504	2	0	1	0	0	0	0.0364976
7559	277.537	2	0	1	0	0	0	0.0364033
7561	277.57	2	0	1	0	0	0	0.0361795
7563	277.604	2	0	1	0	0	0	0.0359205
7565	277.637	2	0	1	0	0	0	0.0357167
7567	277.67	2	0	1	0	0	0	0.0351005
7569	277.704	2	0	1	0	0	0	0.0354452
7571	277.737	2	0	1	0	0	0	0.0356559
7573	277.77	2	0	1	0	0	0	0.0359541
7575	277.804	2	0	1	0	0	0	0.0357979
7577	277.837	2	0	1	0	0	0	0.0350658
7579	277.87	2	0	1	0	0	0	0.0343201
7581	277.904	2	0	1	0	0	0	0.0329571
7583	277.937	2	0	1	0	0	0	0.0327163
7585	277.97	2	0	1	0	0	0	0.0330411
7587	278.003	2	0	1	0	0	0	0.0323369
7589	278.037	2	0	1	0	0	0	0.0329531
7591	278.07	2	0	1	0	0	0	0.0331837
7593	278.103	2	0	1	0	0	0	0.0327021
7595	278.137	2	0	1	0	0	0	0.0337442
7597	278.17	2	0	1	0	0	0	0.0341458
7599	278.203	2	0	1	0	0	0	0.033855
7601	278.237	2	0	1	0	0	0	0.0332853
7603	278.27	2	0	1	0	0	0	0.0332416
7605	278.303	2	0	1	0	0	0	0.032986
7607	278.337	2	0	1	0	0	0	0.0324511
7609	278.37	2	0	1	0	0	0	0.0331428
7611	278.403	2	0	1	0	0	0	0.0325857
7613	278.437	2	0	1	0	0	0	0.0322449
7615	278.47	2	0	1	0	0	0	0.0324971
7617	278.503	2	0	1	0	0	0	0.033625
7619	278.537	2	0	1	0	0	0	0.0332717
7621	278.57	2	0	1	0	0	0	0.0341049
7623	278.603	2	0	1	0	0	0	0.0349358
7625	278.637	2	0	1	0	0	0	0.0349091
7627	278.67	2	0	1	0	0	0	0.035661
7629	278.703	2	0	1	0	0	0	0.0362051
7631	278.737	2	0	1	0	0	0	0.035728
7633	278.77	2	0	1	0	0	0	0.0350539
7635	278.803	2	0	1	0	0	0	0.0341111
7637	278.837	2	0	1	0	0	0	0.0335483
7639	278.87	2	0	1	0	0	0	0.0335807
7641	278.903	2	0	1	0	0	0	0.0342679
7643	278.937	2	0	1	0	0	0	0.0352958
7645	278.97	2	0	1	0	0	0	0.0343553
7647	279.003	2	0	1	0	0	0	0.0336017
7649	279.037	2	0	1	0	0	0	0.0330758
7651	279.07	2	0	1	0	0	0	0.0331371
7653	279.103	2	0	1	0	0	0	0.0333081
7655	279.137	2	0	1	0	0	0	0.0335381
7657	279.17	2	0	1	0	0	0	0.0337272
7659	279.203	2	0	1	0	0	0	0.0335046
7661	279.237	2	0	1	0	0	0	0.0334228
7663	279.27	2	0	1	0	0	0	0.034273
7665	279.303	2	0	1	0	0	0	0.034733
7667	279.337	2	0	1	0	0	0	0.0346734
7669	279.37	2	0	1	0	0	0	0.0343491
7671	279.403	2	0	1	0	0	0	0.0340543
7673	279.437	2	0	1	0	0	0	0.0335858
7675	279.47	2	0	1	0	0	0	0.0333387
7677	279.503	2	0	1	0	0	0	0.0337119
7679	279.537	2	0	1	0	0	0	0.0339419
7681	279.57	2	0	1	0	0	0	0.034386
7683	279.603	2	0	1	0	0	0	0.0347029
7685	279.637	2	0	1	0	0	0	0.0349494
7687	279.67	2	0	1	0	0	0	0.0350777
7689	279.703	2	0	1	0	0	0	0.0349818
7691	279.737	2	0	1	0	0	0	0.0350783
7693	279.77	2	0	1	0	0	0	0.0351925
7695	279.803	2	0	1	0	0	0	0.035573
7697	279.837	2	0	1	0	0	0	0.0354367
7699	279.87	2	0	1	0	0	0	0.0351942
7701	279.903	2	0	1	0	0	0	0.034595
7703	279.937	2	0	1	0	0	0	0.0344877
7705	279.97	2	0	1	0	0	0	0.0344723
7707	280.003	2	0	1	0	0	0	0.0338766
7709	280.037	2	0	1	0	0	0	0.0339458
7711	280.07	2	0	1	0	0	0	0.0338118
7713	280.103	2	0	1	0	0	0	0.0343502
7715	280.137	2	0	1	0	0	0	0.0354747
7717	280.17	2	0	1	0	0	0	0.0347773
7719	280.203	2	0	1	0	0	0	0.0350652
7721	280.237	2	0	1	0	0	0	0.0353628
7723	280.27	2	0	1	0	0	0	0.0353004
7725	280.303	2	0	1	0	0	0	0.0351413
7727	280.337	2	0	1	0	0	0	0.034921
7729	280.37	2	0	1	0	0	0	0.0351311
7731	280.403	2	0	1	0	0	0	0.0351084
7733	280.437	2	0	1	0	0	0	0.0351294
7735	280.47	2	0	1	0	0	0	0.0341991
7737	280.503	2	0	1	0	0	0	0.0335341
7739	280.537	2	0	1	0	0	0	0.0333126
7741	280.57	2	0	1	0	0	0	0.0329616
7743	280.603	2	0	1	0	0	0	0.0329565
7745	280.637	2	0	1	0	0	0	0.0328918
7747	280.67	2	0	1	0	0	0	0.0329809
7749	280.703	2	0	1	0	0	0	0.0325419
7751	280.737	2	0	1	0	0	0	0.0321546
7753	280.77	2	0	1	0	0	0	0.0318803
7755	280.803	2	0	1	0	0	0	0.0322551
7757	280.837	2	0	1	0	0	0	0.032555
7759	280.87	2	0	1	0	0	0	0.0321819
7761	280.903	2	0	1	0	0	0	0.032158
7763	280.937	2	0	1	0	0	0	0.0321251
7765	280.97	2	0	1	0	0	0	0.0326555
7767	281.003	2	0	1	0	0	0	0.0329611
7769	281.037	2	0	1	0	0	0	0.0327248
7771	281.07	2	0	1	0	0	0	0.0328458
7773	281.103	2	0	1	0	0	0	0.0329747
7775	281.137	2	0	1	0	0	0	0.0326464
7777	281.17	2	0	1	0	0	0	0.0328134
7779	281.203	2	0	1	0	0	0	0.0328855
7781	281.237	2	0	1	0	0	0	0.0332768
7783	281.27	2	0	1	0	0	0	0.0335988
7785	281.303	2	0	1	0	0	0	0.0338101
7787	281.337	2	0	1	0	0	0	0.0333768
7789	281.37	2	0	1	0	0	0	0.0332933
7791	281.403	2	0	1	0	0	0	0.0335767
7793	281.437	2	0	1	0	0	0	0.034102
7795	281.47	2	0	1	0	0	0	0.033922
7797	281.503	2	0	1	0	0	0	0.0333206
7799	281.537	2	0	1	0	0	0	0.0332694
7801	281.57	2	0	1	0	0	0	0.0334234
7803	281.603	2	0	1	0	0	0	0.0342849
7805	281.637	2	0	1	0	0	0	0.0350579
7807	281.67	2	0	1	0	0	0	0.034156
7809	281.703	2	0	1	0	0	0	0.0339209
7811	281.737	2	0	1	0	0	0	0.0342781
7813	281.77	2	0	1	0	0	0	0.0348154
7815	281.803	2	0	1	0	0	0	0.0350011
7817	281.837	2	0	1	0	0	0	0.0347466
7819	281.87	2	0	1	0	0	0	0.0347909
7821	281.903	2	0	1	0	0	0	0.0344201
7823	281.937	2	0	1	0	0	0	0.0340134
7825	281.97	2	0	1	0	0	0	0.0337948
7827	282.003	2	0	1	0	0	0	0.0332621
7829	282.037	2	0	1	0	0	0	0.0332922
7831	282.07	2	0	1	0	0	0	0.0339175
7833	282.103	2	0	1	0	0	0	0.0347733
7835	282.137	2	0	1	0	0	0	0.0356332
7837	282.17	2	0	1	0	0	0	0.0357502
7839	282.203	2	0	1	0	0	0	0.0357632
7841	282.237	2	0	1	0	0	0	0.0356672
7843	282.27	2	0	1	0	0	0	0.0355429
7845	282.303	2	0	1	0	0	0	0.0352493
7847	282.337	2	0	1	0	0	0	0.0354446
7849	282.37	2	0	1	0	0	0	0.035544
7851	282.403	2	0	1	0	0	0	0.0352311
7853	282.437	2	0	1	0	0	0	0.0346007
7855	282.47	2	0	1	0	0	0	0.0340691
7857	282.503	2	0	1	0	0	0	0.033918
7859	282.537	2	0	1	0	0	0	0.033855
7861	282.57	2	0	1	0	0	0	0.0336704
7863	282.603	2	0	1	0	0	0	0.0336659
7865	282.637	2	0	1	0	0	0	0.0328588
7867	282.67	2	0	1	0	0	0	0.0324192
7869	282.703	2	0	1	0	0	0	0.0329156
7871	282.737	2	0	1	0	0	0	0.0333796
7873	282.77	2	0	1	0	0	0	0.0332467
7875	282.803	2	0	1	0	0	0	0.0325487
7877	282.837	2	0	1	0	0	0	0.0324408
7879	282.87	2	0	1	0	0	0	0.0318099
7881	282.903	2	0	1	0	0	0	0.0313799
7883	282.937	2	0	1	0	0	0	0.0327577
7885	282.97	2	0	1	0	0	0	0.0330798
7887	283.003	2	0	1	0	0	0	0.0336369
7889	283.037	2	0	1	0	0	0	0.0339004
7891	283.07	2	0	1	0	0	0	0.0341577
7893	283.103	2	0	1	0	0	0	0.0340344
7895	283.137	2	0	1	0	0	0	0.0337119
7897	283.17	2	0	1	0	0	0	0.033228
7899	283.203	2	0	1	0	0	0	0.0331411
7901	283.237	2	0	1	0	0	0	0.0329258
7903	283.27	2	0	1	0	0	0	0.0327793
7905	283.303	2	0	1	0	0	0	0.0329395
7907	283.337	2	0	1	0	0	0	0.0333035
7909	283.37	2	0	1	0	0	0	0.0330252
7911	283.403	2	0	1	0	0	0	0.032697
7913	283.437	2	0	1	0	0	0	0.0323613
7915	283.47	2	0	1	0	0	0	0.0322029
7917	283.503	2	0	1	0	0	0	0.032049
7919	283.537	2	0	1	0	0	0	0.0323863
7921	283.57	2	0	1	0	0	0	0.0329133
7923	283.603	2	0	1	0	0	0	0.032827
7925	283.637	2	0	1	0	0	0	0.0322108
7927	283.67	2	0	1	0	0	0	0.0321546
7929	283.703	2	0	1	0	0	0	0.0325675
7931	283.737	2	0	1	0	0	0	0.0320864
7933	283.77	2	0	1	0	0	0	0.0316219
7935	283.803	2	0	1	0	0	0	0.0319768
7937	283.837	2	0	1	0	0	0	0.0325635
7939	283.87	2	0	1	0	0	0	0.0332961
7941	283.903	2	0	1	0	0	0	0.0331456
7943	283.937	2	0	1	0	0	0	0.033245
7945	283.97	2	0	1	0	0	0	0.0342332
7947	284.003	2	0	1	0	0	0	0.0343269
7949	284.037	2	0	1	0	0	0	0.0338658
7951	284.07	2	0	1	0	0	0	0.0335846
7953	284.103	2	0	1	0	0	0	0.0331979
7955	284.137	2	0	1	0	0	0	0.0326884
7957	284.17	2	0	1	0	0	0	0.032505
7959	284.203	2	0	1	0	0	0	0.0328798
7961	284.237	2	0	1	0	0	0	0.0329287
7963	284.27	2	0	1	0	0	0	0.0329304
7965	284.303	2	0	1	0	0	0	0.0329923
7967	284.337	2	0	1	0	0	0	0.0323727
7969	284.37	2	0	1	0	0	0	0.0333251
7971	284.403	2	0	1	0	0	0	0.0337641
7973	284.437	2	0	1	0	0	0	0.0334688
7975	284.47	2	0	1	0	0	0	0.0331434
7977	284.503	2	0	1	0	0	0	0.0329832
7979	284.537	2	0	1	0	0	0	0.0325749
7981	284.57	2	0	1	0	0	0	0.0323664
7983	284.603	2	0	1	0	0	0	0.0326243
7985	284.637	2	0	1	0	0	0	0.0325817
7987	284.67	2	0	1	0	0	0	0.0324113
7989	284.703	2	0	1	0	0	0	0.0323585
7991	284.737	2	0	1	0	0	0	0.0323784
7993	284.77	2	0	1	0	0	0	0.0324868
7995	284.803	2	0	1	0	0	0	0.0327663
7997	284.837	2	0	1	0	0	0	0.0331553
7999	284.87	2	0	1	0	0	0	0.0330871
8001	284.903	2	0	1	0	0	0	0.03281
8003	284.937	2	0	1	0	0	0	0.0331348
8005	284.97	2	0	1	0	0	0	0.0333666
8007	285.003	2	0	1	0	0	0	0.0331445
8009	285.037	2	0	1	0	0	0	0.0325788
8011	285.07	2	0	1	0	0	0	0.0321353
8013	285.103	2	0	1	0	0	0	0.0322841
8015	285.137	2	0	1	0	0	0	0.0325022
8017	285.17	2	0	1	0	0	0	0.0333069
8019	285.203	2	0	1	0	0	0	0.0333984
8021	285.237	2	0	1	0	0	0	0.0334563
8023	285.27	2	0	1	0	0	0	0.0334495
8025	285.303	2	0	1	0	0	0	0.0339589
8027	285.337	2	0	1	0	0	0	0.0344246
8029	285.37	2	0	1	0	0	0	0.034014
8031	285.403	2	0	1	0	0	0	0.0337295
8033	285.437	2	0	1	0	0	0	0.0333745
8035	285.47	2	0	1	0	0	0	0.0333626
8037	285.503	2	0	1	0	0	0	0.033742
8039	285.537	2	0	1	0	0	0	0.0337709
8041	285.57	2	0	1	0	0	0	0.0339629
8043	285.603	2	0	1	0	0	0	0.0337789
8045	285.637	2	0	1	0	0	0	0.0340015
8047	285.67	2	0	1	0	0	0	0.0340538
8049	285.703	2	0	1	0	0	0	0.0342088
8051	285.737	2	0	1	0	0	0	0.0341725
8053	285.77	2	0	1	0	0	0	0.0339595
8055	285.803	2	0	1	0	0	0	0.0338754
8057	285.837	2	0	1	0	0	0	0.0340367
8059	285.87	2	0	1	0	0	0	0.033859
8061	285.903	2	0	1	0	0	0	0.0336108
8063	285.937	2	0	1	0	0	0	0.0331133
8065	285.97	2	0	1	0	0	0	0.0330656
8067	286.003	2	0	1	0	0	0	0.0334597
8069	286.037	2	0	1	0	0	0	0.0338998
8071	286.07	2	0	1	0	0	0	0.033943
8073	286.103	2	0	1	0	0	0	0.0336392
8075	286.137	2	0	1	0	0	0	0.0336698
8077	286.17	2	0	1	0	0	0	0.0342304
8079	286.203	2	0	1	0	0	0	0.0349534
8081	286.237	2	0	1	0	0	0	0.0348954
8083	286.27	2	0	1	0	0	0	0.0348971
8085	286.303	2	0	1	0	0	0	0.0349074
8087	286.337	2	0	1	0	0	0	0.034925
8089	286.37	2	0	1	0	0	0	0.034829
8091	286.403	2	0	1	0	0	0	0.0348097
8093	286.437	2	0	1	0	0	0	0.0353197
8095	286.47	2	0	1	0	0	0	0.0351504
8097	286.503	2	0	1	0	0	0	0.0346058
8099	286.536	2	0	1	0	0	0	0.0340452
8101	286.57	2	0	1	0	0	0	0.0338521
8103	286.603	2	0	1	0	0	0	0.0343213
8105	286.636	2	0	1	0	0	0	0.0346711
8107	286.67	2	0	1	0	0	0	0.0350669
8109	286.703	2	0	1	0	0	0	0.0350448
8111	286.736	2	0	1	0	0	0	0.0349431
8113	286.77	2	0	1	0	0	0	0.0347171
8115	286.803	2	0	1	0	0	0	0.0341605
8117	286.836	2	0	1	0	0	0	0.0340998
8119	286.87	2	0	1	0	0	0	0.0337601
8121	286.903	2	0	1	0	0	0	0.0338095
8123	286.936	2	0	1	0	0	0	0.0337834
8125	286.97	2	0	1	0	0	0	0.0336937
8127	287.003	2	0	1	0	0	0	0.0337317
8129	287.036	2	0	1	0	0	0	0.0335585
8131	287.07	2	0	1	0	0	0	0.0336005
8133	287.103	2	0	1	0	0	0	0.0333813
8135	287.136	2	0	1	0	0	0	0.0335523
8137	287.17	2	0	1	0	0	0	0.0337755
8139	287.203	2	0	1	0	0	0	0.0336386
8141	287.236	2	0	1	0	0	0	0.0331979
8143	287.27	2	0	1	0	0	0	0.0328566
8145	287.303	2	0	1	0	0	0	0.0327129
8147	287.336	2	0	1	0	0	0	0.0324596
8149	287.37	2	0	1	0	0	0	0.0326078
8151	287.403	2	0	1	0	0	0	0.0327549
8153	287.436	2	0	1	0	0	0	0.0325715
8155	287.47	2	0	1	0	0	0	0.032292
8157	287.503	2	0	1	0	0	0	0.0321824
8159	287.536	2	0	1	0	0	0	0.032254
8161	287.57	2	0	1	0	0	0	0.032743
8163	287.603	2	0	1	0	0	0	0.0327396
8165	287.636	2	0	1	0	0	0	0.0327129
8167	287.67	2	0	1	0	0	0	0.0328475
8169	287.703	2	0	1	0	0	0	0.0322244
8171	287.736	2	0	1	0	0	0	0.0321955
8173	287.77	2	0	1	0	0	0	0.0327214
8175	287.803	2	0	1	0	0	0	0.0329605
8177	287.836	2	0	1	0	0	0	0.0327617
8179	287.87	2	0	1	0	0	0	0.0328077
8181	287.903	2	0	1	0	0	0	0.032668
8183	287.936	2	0	1	0	0	0	0.0329281
8185	287.97	2	0	1	0	0	0	0.0329185
8187	288.003	2	0	1	0	0	0	0.0326788
8189	288.036	2	0	1	0	0	0	0.0328395
8191	288.07	2	0	1	0	0	0	0.0327447
8193	288.103	2	0	1	0	0	0	0.0327833
8195	288.136	2	0	1	0	0	0	0.0325203
8197	288.17	2	0	1	0	0	0	0.0324902
8199	288.203	2	0	1	0	0	0	0.0324079
8201	288.236	2	0	1	0	0	0	0.0318224
8203	288.27	2	0	1	0	0	0	0.0317315
8205	288.303	2	0	1	0	0	0	0.0322091
8207	288.336	2	0	1	0	0	0	0.0324914
8209	288.37	2	0	1	0	0	0	0.032998
8211	288.403	2	0	1	0	0	0	0.033621
8213	288.436	2	0	1	0	0	0	0.0338771
8215	288.47	2	0	1	0	0	0	0.0339004
8217	288.503	2	0	1	0	0	0	0.0332393
8219	288.536	2	0	1	0	0	0	0.0325868
8221	288.57	2	0	1	0	0	0	0.0324374
8223	288.603	2	0	1	0	0	0	0.032597
8225	288.636	2	0	1	0	0	0	0.0329264
8227	288.67	2	0	1	0	0	0	0.0327242
8229	288.703	2	0	1	0	0	0	0.0319428
8231	288.736	2	0	1	0	0	0	0.0311141
8233	288.77	2	0	1	0	0	0	0.0310369
8235	288.803	2	0	1	0	0	0	0.0311425
8237	288.836	2	0	1	0	0	0	0.0315821
8239	288.87	2	0	1	0	0	0	0.0322511
8241	288.903	2	0	1	0	0	0	0.0327134
8243	288.936	2	0	1	0	0	0	0.0322534
8245	288.97	2	0	1	0	0	0	0.0322875
8247	289.003	2	0	1	0	0	0	0.0320495
8249	289.036	2	0	1	0	0	0	0.0319223
8251	289.07	2	0	1	0	0	0	0.0314958
8253	289.103	2	0	1	0	0	0	0.0311579
8255	289.136	2	0	1	0	0	0	0.031284
8257	289.17	2	0	1	0	0	0	0.0316429
8259	289.203	2	0	1	0	0	0	0.031945
8261	289.236	2	0	1	0	0	0	0.0321415
8263	289.27	2	0	1	0	0	0	0.0317326
8265	289.303	2	0	1	0	0	0	0.0317133
8267	289.336	2	0	1	0	0	0	0.0320291
8269	289.37	2	0	1	0	0	0	0.0325107
8271	289.403	2	0	1	0	0	0	0.032806
8273	289.436	2	0	1	0	0	0	0.0324948
8275	289.47	2	0	1	0	0	0	0.0326754
8277	289.503	2	0	1	0	0	0	0.032718
8279	289.536	2	0	1	0	0	0	0.0329156
8281	289.57	2	0	1	0	0	0	0.0331138
8283	289.603	2	0	1	0	0	0	0.0332558
8285	289.636	2	0	1	0	0	0	0.0331275
8287	289.67	2	0	1	0	0	0	0.0328588
8289	289.703	2	0	1	0	0	0	0.0332723
8291	289.736	2	0	1	0	0	0	0.0333302
8293	289.77	2	0	1	0	0	0	0.0334591
8295	289.803	2	0	1	0	0	0	0.0334302
8297	289.836	2	0	1	0	0	0	0.0332609
8299	289.87	2	0	1	0	0	0	0.0328963
8301	289.903	2	0	1	0	0	0	0.0325476
8303	289.936	2	0	1	0	0	0	0.0324851
8305	289.97	2	0	1	0	0	0	0.0324505
8307	290.003	2	0	1	0	0	0	0.0326385
8309	290.036	2	0	1	0	0	0	0.0325431
8311	290.07	2	0	1	0	0	0	0.0322943
8313	290.103	2	0	1	0	0	0	0.0329071
8315	290.136	2	0	1	0	0	0	0.0328083
8317	290.17	2	0	1	0	0	0	0.0331087
8319	290.203	2	0	1	0	0	0	0.0334182
8321	290.236	2	0	1	0	0	0	0.0334273
8323	290.27	2	0	1	0	0	0	0.0333745
8325	290.303	2	0	1	0	0	0	0.0328407
8327	290.336	2	0	1	0	0	0	0.0328764
8329	290.37	2	0	1	0	0	0	0.0330548
8331	290.403	2	0	1	0	0	0	0.0331814
8333	290.436	2	0	1	0	0	0	0.033642
8335	290.47	2	0	1	0	0	0	0.0335176
8337	290.503	2	0	1	0	0	0	0.033575
8339	290.536	2	0	1	0	0	0	0.0330945
8341	290.57	2	0	1	0	0	0	0.0323749
8343	290.603	2	0	1	0	0	0	0.0325266
8345	290.636	2	0	1	0	0	0	0.0329849
8347	290.67	2	0	1	0	0	0	0.0331445
8349	290.703	2	0	1	0	0	0	0.0330093
8351	290.736	2	0	1	0	0	0	0.0330996
8353	290.77	2	0	1	0	0	0	0.0336017
8355	290.803	2	0	1	0	0	0	0.034068
8357	290.836	2	0	1	0	0	0	0.0337567
8359	290.87	2	0	1	0	0	0	0.0331854
8361	290.903	2	0	1	0	0	0	0.0332325
8363	290.936	2	0	1	0	0	0	0.0334688
8365	290.97	2	0	1	0	0	0	0.0331269
8367	291.003	2	0	1	0	0	0	0.0327129
8369	291.036	2	0	1	0	0	0	0.0329605
8371	291.07	2	0	1	0	0	0	0.033571
8373	291.103	2	0	1	0	0	0	0.033596
8375	291.136	2	0	1	0	0	0	0.033905
8377	291.17	2	0	1	0	0	0	0.0344286
8379	291.203	2	0	1	0	0	0	0.0342031
8381	291.236	2	0	1	0	0	0	0.0341469
8383	291.27	2	0	1	0	0	0	0.0337113
8385	291.303	2	0	1	0	0	0	0.0336187
8387	291.336	2	0	1	0	0	0	0.0333808
8389	291.37	2	0	1	0	0	0	0.0334574
8391	291.403	2	0	1	0	0	0	0.0334847
8393	291.436	2	0	1	0	0	0	0.0333183
8395	291.47	2	0	1	0	0	0	0.033086
8397	291.503	2	0	1	0	0	0	0.0328617
8399	291.536	2	0	1	0	0	0	0.0326902
8401	291.57	2	0	1	0	0	0	0.0323255
8403	291.603	2	0	1	0	0	0	0.0322954
8405	291.636	2	0	1	0	0	0	0.0323619
8407	291.67	2	0	1	0	0	0	0.0324005
8409	291.703	2	0	1	0	0	0	0.0328469
8411	291.736	2	0	1	0	0	0	0.0330213
8413	291.77	2	0	1	0	0	0	0.0334393
8415	291.803	2	0	1	0	0	0	0.033742
8417	291.836	2	0	1	0	0	0	0.0335057
8419	291.87	2	0	1	0	0	0	0.0333296
8421	291.903	2	0	1	0	0	0	0.0329707
8423	291.936	2	0	1	0	0	0	0.0326282
8425	291.97	2	0	1	0	0	0	0.0322977
8427	292.003	2	0	1	0	0	0	0.0322239
8429	292.036	2	0	1	0	0	0	0.0327805
8431	292.07	2	0	1	0	0	0	0.0327038
8433	292.103	2	0	1	0	0	0	0.0330133
8435	292.136	2	0	1	0	0	0	0.0330394
8437	292.17	2	0	1	0	0	0	0.0328566
8439	292.203	2	0	1	0	0	0	0.0327447
8441	292.236	2	0	1	0	0	0	0.032931
8443	292.27	2	0	1	0	0	0	0.0332689
8445	292.303	2	0	1	0	0	0	0.0334256
8447	292.336	2	0	1	0	0	0	0.0337493
8449	292.37	2	0	1	0	0	0	0.0335296
8451	292.403	2	0	1	0	0	0	0.0329565
8453	292.436	2	0	1	0	0	0	0.0323017
8455	292.47	2	0	1	0	0	0	0.0321347
8457	292.503	2	0	1	0	0	0	0.0319132
8459	292.536	2	0	1	0	0	0	0.0318456
8461	292.57	2	0	1	0	0	0	0.0319229
8463	292.603	2	0	1	0	0	0	0.0321023
8465	292.636	2	0	1	0	0	0	0.0322034
8467	292.67	2	0	1	0	0	0	0.0326487
8469	292.703	2	0	1	0	0	0	0.0324522
8471	292.736	2	0	1	0	0	0	0.0326884
8473	292.77	2	0	1	0	0	0	0.032718
8475	292.803	2	0	1	0	0	0	0.0330735
8477	292.836	2	0	1	0	0	0	0.0333717
8479	292.87	2	0	1	0	0	0	0.0330303
8481	292.903	2	0	1	0	0	0	0.0324794
8483	292.936	2	0	1	0	0	0	0.032421
8485	292.97	2	0	1	0	0	0	0.0328867
8487	293.003	2	0	1	0	0	0	0.0337652
8489	293.036	2	0	1	0	0	0	0.0335648
8491	293.07	2	0	1	0	0	0	0.0334461
8493	293.103	2	0	1	0	0	0	0.0334341
8495	293.136	2	0	1	0	0	0	0.0344053
8497	293.17	2	0	1	0	0	0	0.0352078
8499	293.203	2	0	1	0	0	0	0.0355809
8501	293.236	2	0	1	0	0	0	0.0353929
8503	293.27	2	0	1	0	0	0	0.0349233
8505	293.303	2	0	1	0	0	0	0.0346768
8507	293.336	2	0	1	0	0	0	0.0344445
8509	293.37	2	0	1	0	0	0	0.0343053
8511	293.403	2	0	1	0	0	0	0.0343213
8513	293.436	2	0	1	0	0	0	0.0342826
8515	293.47	2	0	1	0	0	0	0.0342872
8517	293.503	2	0	1	0	0	0	0.0339919
8519	293.536	2	0	1	0	0	0	0.0338544
8521	293.57	2	0	1	0	0	0	0.0330854
8523	293.603	2	0	1	0	0	0	0.0327441
8525	293.636	2	0	1	0	0	0	0.0328083
8527	293.67	2	0	1	0	0	0	0.0328935
8529	293.703	2	0	1	0	0	0	0.0329185
8531	293.736	2	0	1	0	0	0	0.0328753
8533	293.77	2	0	1	0	0	0	0.0327861
8535	293.803	2	0	1	0	0	0	0.0328259
8537	293.836	2	0	1	0	0	0	0.0329809
8539	293.87	2	0	1	0	0	0	0.033241
8541	293.903	2	0	1	0	0	0	0.0330968
8543	293.936	2	0	1	0	0	0	0.0330428
8545	293.97	2	0	1	0	0	0	0.0330082
8547	294.003	2	0	1	0	0	0	0.0327878
8549	294.036	2	0	1	0	0	0	0.0332859
8551	294.07	2	0	1	0	0	0	0.0334148
8553	294.103	2	0	1	0	0	0	0.0333705
8555	294.136	2	0	1	0	0	0	0.0334279
8557	294.17	2	0	1	0	0	0	0.0332569
8559	294.203	2	0	1	0	0	0	0.0330684
8561	294.236	2	0	1	0	0	0	0.0332303
8563	294.27	2	0	1	0	0	0	0.0335585
8565	294.303	2	0	1	0	0	0	0.0333171
8567	294.336	2	0	1	0	0	0	0.0333257
8569	294.37	2	0	1	0	0	0	0.0330167
8571	294.403	2	0	1	0	0	0	0.032994
8573	294.436	2	0	1	0	0	0	0.033174
8575	294.47	2	0	1	0	0	0	0.0334415
8577	294.503	2	0	1	0	0	0	0.0335472
8579	294.536	2	0	1	0	0	0	0.0334126
8581	294.57	2	0	1	0	0	0	0.033533
8583	294.603	2	0	1	0	0	0	0.0335091
8585	294.636	2	0	1	0	0	0	0.0336488
8587	294.67	2	0	1	0	0	0	0.0339033
8589	294.703	2	0	1	0	0	0	0.0340492
8591	294.736	2	0	1	0	0	0	0.0337397
8593	294.77	2	0	1	0	0	0	0.0331632
8595	294.803	2	0	1	0	0	0	0.0329423
8597	294.836	2	0	1	0	0	0	0.032835
8599	294.87	2	0	1	0	0	0	0.0331854
8601	294.903	2	0	1	0	0	0	0.0339947
8603	294.936	2	0	1	0	0	0	0.033776
8605	294.97	2	0	1	0	0	0	0.0332365
8607	295.003	2	0	1	0	0	0	0.0325215
8609	295.036	2	0	1	0	0	0	0.031932
8611	295.069	2	0	1	0	0	0	0.0322324
8613	295.103	2	0	1	0	0	0	0.0323329
8615	295.136	2	0	1	0	0	0	0.0323857
8617	295.169	2	0	1	0	0	0	0.0324908
8619	295.203	2	0	1	0	0	0	0.0327237
8621	295.236	2	0	1	0	0	0	0.0326288
8623	295.269	2	0	1	0	0	0	0.0326055
8625	295.303	2	0	1	0	0	0	0.0323261
8627	295.336	2	0	1	0	0	0	0.0320035
8629	295.369	2	0	1	0	0	0	0.0323619
8631	295.403	2	0	1	0	0	0	0.032852
8633	295.436	2	0	1	0	0	0	0.0328452
8635	295.469	2	0	1	0	0	0	0.0329525
8637	295.503	2	0	1	0	0	0	0.0326794
8639	295.536	2	0	1	0	0	0	0.0322386
8641	295.569	2	0	1	0	0	0	0.0319683
8643	295.603	2	0	1	0	0	0	0.0318854
8645	295.636	2	0	1	0	0	0	0.0318263
8647	295.669	2	0	1	0	0	0	0.0315571
8649	295.703	2	0	1	0	0	0	0.0317548
8651	295.736	2	0	1	0	0	0	0.032095
8653	295.769	2	0	1	0	0	0	0.0321569
8655	295.803	2	0	1	0	0	0	0.0319104
8657	295.836	2	0	1	0	0	0	0.0318047
8659	295.869	2	0	1	0	0	0	0.0317031
8661	295.903	2	0	1	0	0	0	0.0317008
8663	295.936	2	0	1	0	0	0	0.0315844
8665	295.969	2	0	1	0	0	0	0.0316497
8667	296.003	2	0	1	0	0	0	0.0314844
8669	296.036	2	0	1	0	0	0	0.0312612
8671	296.069	2	0	1	0	0	0	0.0314651
8673	296.103	2	0	1	0	0	0	0.0327049
8675	296.136	2	0	1	0	0	0	0.0329542
8677	296.169	2	0	1	0	0	0	0.0324999
8679	296.203	2	0	1	0	0	0	0.0320654
8681	296.236	2	0	1	0	0	0	0.0318763
8683	296.269	2	0	1	0	0	0	0.0320859
8685	296.303	2	0	1	0	0	0	0.0324266
8687	296.336	2	0	1	0	0	0	0.032739
8689	296.369	2	0	1	0	0	0	0.0327521
8691	296.403	2	0	1	0	0	0	0.0330497
8693	296.436	2	0	1	0	0	0	0.0331519
8695	296.469	2	0	1	0	0	0	0.0330502
8697	296.503	2	0	1	0	0	0	0.0330928
8699	296.536	2	0	1	0	0	0	0.0328111
8701	296.569	2	0	1	0	0	0	0.0325998
8703	296.603	2	0	1	0	0	0	0.032965
8705	296.636	2	0	1	0	0	0	0.0329219
8707	296.669	2	0	1	0	0	0	0.0329486
8709	296.703	2	0	1	0	0	0	0.0328123
8711	296.736	2	0	1	0	0	0	0.0335068
8713	296.769	2	0	1	0	0	0	0.0335261
8715	296.803	2	0	1	0	0	0	0.0334262
8717	296.836	2	0	1	0	0	0	0.0336051
8719	296.869	2	0	1	0	0	0	0.0332291
8721	296.903	2	0	1	0	0	0	0.0325056
8723	296.936	2	0	1	0	0	0	0.0323897
8725	296.969	2	0	1	0	0	0	0.0329963
8727	297.003	2	0	1	0	0	0	0.0330866
8729	297.036	2	0	1	0	0	0	0.0329611
8731	297.069	2	0	1	0	0	0	0.032693
8733	297.103	2	0	1	0	0	0	0.0326606
8735	297.136	2	0	1	0	0	0	0.0323488
8737	297.169	2	0	1	0	0	0	0.0321324
8739	297.203	2	0	1	0	0	0	0.0323329
8741	297.236	2	0	1	0	0	0	0.0319416
8743	297.269	2	0	1	0	0	0	0.0319552
8745	297.303	2	0	1	0	0	0	0.0320194
8747	297.336	2	0	1	0	0	0	0.0313084
8749	297.369	2	0	1	0	0	0	0.0318246
8751	297.403	2	0	1	0	0	0	0.0336886
8753	297.436	2	0	1	0	0	0	0.0334285
8755	297.469	2	0	1	0	0	0	0.0332217
8757	297.503	2	0	1	0	0	0	0.0327259
8759	297.536	2	0	1	0	0	0	0.0316508
8761	297.569	2	0	1	0	0	0	0.0314475
8763	297.603	2	0	1	0	0	0	0.0321955
8765	297.636	2	0	1	0	0	0	0.0324147
8767	297.669	2	0	1	0	0	0	0.031924
8769	297.703	2	0	1	0	0	0	0.0318956
8771	297.736	2	0	1	0	0	0	0.0317985
8773	297.769	2	0	1	0	0	0	0.0318303
8775	297.803	2	0	1	0	0	0	0.0319933
8777	297.836	2	0	1	0	0	0	0.0317741
8779	297.869	2	0	1	0	0	0	0.0319251
8781	297.903	2	0	1	0	0	0	0.0318615
8783	297.936	2	0	1	0	0	0	0.0318104
8785	297.969	2	0	1	0	0	0	0.0321268
8787	298.003	2	0	1	0	0	0	0.0323341
8789	298.036	2	0	1	0	0	0	0.0328878
8791	298.069	2	0	1	0	0	0	0.0333631
8793	298.103	2	0	1	0	0	0	0.0330985
8795	298.136	2	0	1	0	0	0	0.0328236
8797	298.169	2	0	1	0	0	0	0.0328446
8799	298.203	2	0	1	0	0	0	0.0328509
8801	298.236	2	0	1	0	0	0	0.0327657
8803	298.269	2	0	1	0	0	0	0.0329571
8805	298.303	2	0	1	0	0	0	0.0329463
8807	298.336	2	0	1	0	0	0	0.0331229
8809	298.369	2	0	1	0	0	0	0.033178
8811	298.403	2	0	1	0	0	0	0.0329798
8813	298.436	2	0	1	0	0	0	0.0326731
8815	298.469	2	0	1	0	0	0	0.032722
8817	298.503	2	0	1	0	0	0	0.0322472
8819	298.536	2	0	1	0	0	0	0.0319445
8821	298.569	2	0	1	0	0	0	0.032877
8823	298.603	2	0	1	0	0	0	0.0335176
8825	298.636	2	0	1	0	0	0	0.0332303
8827	298.669	2	0	1	0	0	0	0.0335369
8829	298.703	2	0	1	0	0	0	0.0337931
8831	298.736	2	0	1	0	0	0	0.0340032
8833	298.769	2	0	1	0	0	0	0.0334427
8835	298.803	2	0	1	0	0	0	0.0330122
8837	298.836	2	0	1	0	0	0	0.0326192
8839	298.869	2	0	1	0	0	0	0.0320177
8841	298.903	2	0	1	0	0	0	0.032363
8843	298.936	2	0	1	0	0	0	0.0330701
8845	298.969	2	0	1	0	0	0	0.0329571
8847	299.003	2	0	1	0	0	0	0.0322489
8849	299.036	2	0	1	0	0	0	0.0315123
8851	299.069	2	0	1	0	0	0	0.031364
8853	299.103	2	0	1	0	0	0	0.0314248
8855	299.136	2	0	1	0	0	0	0.031941
8857	299.169	2	0	1	0	0	0	0.0320342
8859	299.203	2	0	1	0	0	0	0.0316378
8861	299.236	2	0	1	0	0	0	0.0314407
8863	299.269	2	0	1	0	0	0	0.0311948
8865	299.303	2	0	1	0	0	0	0.0311266
8867	299.336	2	0	1	0	0	0	0.0311442
8869	299.369	2	0	1	0	0	0	0.0317122
8871	299.403	2	0	1	0	0	0	0.0319552
8873	299.436	2	0	1	0	0	0	0.0317252
8875	299.469	2	0	1	0	0	0	0.0317695
8877	299.503	2	0	1	0	0	0	0.0316508
8879	299.536	2	0	1	0	0	0	0.0319098
8881	299.569	2	0	1	0	0	0	0.0321364
8883	299.603	2	0	1	0	0	0	0.0320279
8885	299.636	2	0	1	0	0	0	0.0319643
8887	299.669	2	0	1	0	0	0	0.0320296
8889	299.703	2	0	1	0	0	0	0.0322057
8891	299.736	2	0	1	0	0	0	0.0320592
8893	299.769	2	0	1	0	0	0	0.0322057
8895	299.803	2	0	1	0	0	0	0.0321313
8897	299.836	2	0	1	0	0	0	0.0317428
8899	299.869	2	0	1	0	0	0	0.0320847
8901	299.903	2	0	1	0	0	0	0.0322653
8903	299.936	2	0	1	0	0	0	0.0320791
8905	299.969	2	0	1	0	0	0	0.0323358
8907	300.003	2	0	1	0	0	0	0.0320938
8909	300.036	2	0	1	0	0	0	0.0318286
8911	300.069	2	0	1	0	0	0	0.0317985
8913	300.103	2	0	1	0	0	0	0.0317059
8915	300.136	2	0	1	0	0	0	0.031878
8917	300.169	2	0	1	0	0	0	0.0322971
8919	300.203	2	0	1	0	0	0	0.03294
8921	300.236	2	0	1	0	0	0	0.0328742
8923	300.269	2	0	1	0	0	0	0.032526
8925	300.303	2	0	1	0	0	0	0.0326192
8927	300.336	2	0	1	0	0	0	0.033487
8929	300.369	2	0	1	0	0	0	0.0342054
8931	300.403	2	0	1	0	0	0	0.0340566
8933	300.436	2	0	1	0	0	0	0.033713
8935	300.469	2	0	1	0	0	0	0.0337255
8937	300.503	2	0	1	0	0	0	0.0338374
8939	300.536	2	0	1	0	0	0	0.0336318
8941	300.569	2	0	1	0	0	0	0.0336908
8943	300.603	2	0	1	0	0	0	0.0338215
8945	300.636	2	0	1	0	0	0	0.03309
8947	300.669	2	0	1	0	0	0	0.0325629
8949	300.703	2	0	1	0	0	0	0.0321415
8951	300.736	2	0	1	0	0	0	0.0326078
8953	300.769	2	0	1	0	0	0	0.0329753
8955	300.803	2	0	1	0	0	0	0.0331473
8957	300.836	2	0	1	0	0	0	0.0332927
8959	300.869	2	0	1	0	0	0	0.0333064
8961	300.903	2	0	1	0	0	0	0.0327617
8963	300.936	2	0	1	0	0	0	0.0325368
8965	300.969	2	0	1	0	0	0	0.0322977
8967	301.003	2	0	1	0	0	0	0.0326237
8969	301.036	2	0	1	0	0	0	0.0327458
8971	301.069	2	0	1	0	0	0	0.0328248
8973	301.103	2	0	1	0	0	0	0.0325902
8975	301.136	2	0	1	0	0	0	0.0323426
8977	301.169	2	0	1	0	0	0	0.0322114
8979	301.203	2	0	1	0	0	0	0.0319967
8981	301.236	2	0	1	0	0	0	0.0317366
8983	301.269	2	0	1	0	0	0	0.031652
8985	301.303	2	0	1	0	0	0	0.0314288
8987	301.336	2	0	1	0	0	0	0.0315997
8989	301.369	2	0	1	0	0	0	0.0315475
8991	301.403	2	0	1	0	0	0	0.0314157
8993	301.436	2	0	1	0	0	0	0.0315872
8995	301.469	2	0	1	0	0	0	0.0320558
8997	301.503	2	0	1	0	0	0	0.0321307
8999	301.536	2	0	1	0	0	0	0.0320632
9001	301.569	2	0	1	0	0	0	0.0324039
9003	301.603	2	0	1	0	0	0	0.0319467
9005	301.636	2	0	1	0	0	0	0.0316929
9007	301.669	2	0	1	0	0	0	0.0323346
9009	301.703	2	0	1	0	0	0	0.0330911
9011	301.736	2	0	1	0	0	0	0.0334574
9013	301.769	2	0	1	0	0	0	0.0331882
9015	301.803	2	0	1	0	0	0	0.0331632
9017	301.836	2	0	1	0	0	0	0.0329684
9019	301.869	2	0	1	0	0	0	0.0322869
9021	301.903	2	0	1	0	0	0	0.0324147
9023	301.936	2	0	1	0	0	0	0.0322051
9025	301.969	2	0	1	0	0	0	0.0325095
9027	302.003	2	0	1	0	0	0	0.0322881
9029	302.036	2	0	1	0	0	0	0.0314174
9031	302.069	2	0	1	0	0	0	0.0314339
9033	302.103	2	0	1	0	0	0	0.0315128
9035	302.136	2	0	1	0	0	0	0.0319626
9037	302.169	2	0	1	0	0	0	0.0321353
9039	302.203	2	0	1	0	0	0	0.0317553
9041	302.236	2	0	1	0	0	0	0.0321006
9043	302.269	2	0	1	0	0	0	0.0321699
9045	302.303	2	0	1	0	0	0	0.0321018
9047	302.336	2	0	1	0	0	0	0.0321256
9049	302.369	2	0	1	0	0	0	0.032095
9051	302.403	2	0	1	0	0	0	0.0323562
9053	302.436	2	0	1	0	0	0	0.0324624
9055	302.469	2	0	1	0	0	0	0.0329185
9057	302.503	2	0	1	0	0	0	0.0323568
9059	302.536	2	0	1	0	0	0	0.0316633
9061	302.569	2	0	1	0	0	0	0.0319791
9063	302.603	2	0	1	0	0	0	0.0324073
9065	302.636	2	0	1	0	0	0	0.0325573
9067	302.669	2	0	1	0	0	0	0.0323755
9069	302.703	2	0	1	0	0	0	0.0324982
9071	302.736	2	0	1	0	0	0	0.0327265
9073	302.769	2	0	1	0	0	0	0.0325987
9075	302.802	2	0	1	0	0	0	0.0329434
9077	302.836	2	0	1	0	0	0	0.0331933
9079	302.869	2	0	1	0	0	0	0.0332195
9081	302.902	2	0	1	0	0	0	0.0332831
9083	302.936	2	0	1	0	0	0	0.0333978
9085	302.969	2	0	1	0	0	0	0.0335585
9087	303.002	2	0	1	0	0	0	0.0337136
9089	303.036	2	0	1	0	0	0	0.0334052
9091	303.069	2	0	1	0	0	0	0.0335381
9093	303.102	2	0	1	0	0	0	0.0338891
9095	303.136	2	0	1	0	0	0	0.0341849
9097	303.169	2	0	1	0	0	0	0.0339402
9099	303.202	2	0	1	0	0	0	0.0336272
9101	303.236	2	0	1	0	0	0	0.0330843
9103	303.269	2	0	1	0	0	0	0.0330905
9105	303.302	2	0	1	0	0	0	0.0328549
9107	303.336	2	0	1	0	0	0	0.0325459
9109	303.369	2	0	1	0	0	0	0.0331769
9111	303.402	2	0	1	0	0	0	0.0331962
9113	303.436	2	0	1	0	0	0	0.0333671
9115	303.469	2	0	1	0	0	0	0.0331877
9117	303.502	2	0	1	0	0	0	0.0332388
9119	303.536	2	0	1	0	0	0	0.033228
9121	303.569	2	0	1	0	0	0	0.0332956
9123	303.602	2	0	1	0	0	0	0.0332092
9125	303.636	2	0	1	0	0	0	0.0330014
9127	303.669	2	0	1	0	0	0	0.0328702
9129	303.702	2	0	1	0	0	0	0.0330099
9131	303.736	2	0	1	0	0	0	0.0329048
9133	303.769	2	0	1	0	0	0	0.032877
9135	303.802	2	0	1	0	0	0	0.032467
9137	303.836	2	0	1	0	0	0	0.0325788
9139	303.869	2	0	1	0	0	0	0.0324397
9141	303.902	2	0	1	0	0	0	0.0323943
9143	303.936	2	0	1	0	0	0	0.0329758
9145	303.969	2	0	1	0	0	0	0.0335
9147	304.002	2	0	1	0	0	0	0.0336715
9149	304.036	2	0	1	0	0	0	0.0339265
9151	304.069	2	0	1	0	0	0	0.0341378
9153	304.102	2	0	1	0	0	0	0.0344212
9155	304.136	2	0	1	0	0	0	0.0342883
9157	304.169	2	0	1	0	0	0	0.0339953
9159	304.202	2	0	1	0	0	0	0.0342338
9161	304.236	2	0	1	0	0	0	0.0341781
9163	304.269	2	0	1	0	0	0	0.0341901
9165	304.302	2	0	1	0	0	0	0.0341265
9167	304.336	2	0	1	0	0	0	0.0342105
9169	304.369	2	0	1	0	0	0	0.033851
9171	304.402	2	0	1	0	0	0	0.033947
9173	304.436	2	0	1	0	0	0	0.0342099
9175	304.469	2	0	1	0	0	0	0.033876
9177	304.502	2	0	1	0	0	0	0.0339992
9179	304.536	2	0	1	0	0	0	0.0339867
9181	304.569	2	0	1	0	0	0	0.0337141
9183	304.602	2	0	1	0	0	0	0.0333461
9185	304.636	2	0	1	0	0	0	0.033345
9187	304.669	2	0	1	0	0	0	0.0334824
9189	304.702	2	0	1	0	0	0	0.0331241
9191	304.736	2	0	1	0	0	0	0.0332672
9193	304.769	2	0	1	0	0	0	0.0327282
9195	304.802	2	0	1	0	0	0	0.0324766
9197	304.836	2	0	1	0	0	0	0.0325993
9199	304.869	2	0	1	0	0	0	0.0329798
9201	304.902	2	0	1	0	0	0	0.0336017
9203	304.936	2	0	1	0	0	0	0.0334909
9205	304.969	2	0	1	0	0	0	0.0325919
9207	305.002	2	0	1	0	0	0	0.0318644
9209	305.036	2	0	1	0	0	0	0.031623
9211	305.069	2	0	1	0	0	0	0.0320137
9213	305.102	2	0	1	0	0	0	0.032434
9215	305.136	2	0	1	0	0	0	0.0325578
9217	305.169	2	0	1	0	0	0	0.0324306
9219	305.202	2	0	1	0	0	0	0.0320916
9221	305.236	2	0	1	0	0	0	0.0322392
9223	305.269	2	0	1	0	0	0	0.0330917
9225	305.302	2	0	1	0	0	0	0.0337664
9227	305.336	2	0	1	0	0	0	0.0335068
9229	305.369	2	0	1	0	0	0	0.0330991
9231	305.402	2	0	1	0	0	0	0.0328952
9233	305.436	2	0	1	0	0	0	0.0324641
9235	305.469	2	0	1	0	0	0	0.0324868
9237	305.502	2	0	1	0	0	0	0.0323704
9239	305.536	2	0	1	0	0	0	0.0322233
9241	305.569	2	0	1	0	0	0	0.032325
9243	305.602	2	0	1	0	0	0	0.0321251
9245	305.636	2	0	1	0	0	0	0.0318161
9247	305.669	2	0	1	0	0	0	0.0324618
9249	305.702	2	0	1	0	0	0	0.0332308
9251	305.736	2	0	1	0	0	0	0.0334665
9253	305.769	2	0	1	0	0	0	0.0336704
9255	305.802	2	0	1	0	0	0	0.0336062
9257	305.836	2	0	1	0	0	0	0.0332041
9259	305.869	2	0	1	0	0	0	0.0326464
9261	305.902	2	0	1	0	0	0	0.0329605
9263	305.936	2	0	1	0	0	0	0.0330019
9265	305.969	2	0	1	0	0	0	0.0325289
9267	306.002	2	0	1	0	0	0	0.0324068
9269	306.036	2	0	1	0	0	0	0.0328299
9271	306.069	2	0	1	0	0	0	0.0333421
9273	306.102	2	0	1	0	0	0	0.0337283
9275	306.136	2	0	1	0	0	0	0.0333802
9277	306.169	2	0	1	0	0	0	0.0331854
9279	306.202	2	0	1	0	0	0	0.0335307
9281	306.236	2	0	1	0	0	0	0.033692
9283	306.269	2	0	1	0	0	0	0.0335648
9285	306.302	2	0	1	0	0	0	0.0338056
9287	306.336	2	0	1	0	0	0	0.0336386
9289	306.369	2	0	1	0	0	0	0.0337749
9291	306.402	2	0	1	0	0	0	0.0341475
9293	306.436	2	0	1	0	0	0	0.0343065
9295	306.469	2	0	1	0	0	0	0.0339407
9297	306.502	2	0	1	0	0	0	0.0335642
9299	306.536	2	0	1	0	0	0	0.0335875
9301	306.569	2	0	1	0	0	0	0.0340038
9303	306.602	2	0	1	0	0	0	0.0339816
9305	306.636	2	0	1	0	0	0	0.0339402
9307	306.669	2	0	1	0	0	0	0.0341458
9309	306.702	2	0	1	0	0	0	0.0345734
9311	306.736	2	0	1	0	0	0	0.0349698
9313	306.769	2	0	1	0	0	0	0.0341747
9315	306.802	2	0	1	0	0	0	0.034223
9317	306.836	2	0	1	0	0	0	0.0340725
9319	306.869	2	0	1	0	0	0	0.0337829
9321	306.902	2	0	1	0	0	0	0.0338022
9323	306.936	2	0	1	0	0	0	0.0337005
9325	306.969	2	0	1	0	0	0	0.0335403
9327	307.002	2	0	1	0	0	0	0.0332723
9329	307.036	2	0	1	0	0	0	0.0335824
9331	307.069	2	0	1	0	0	0	0.0338334
9333	307.102	2	0	1	0	0	0	0.0335597
9335	307.136	2	0	1	0	0	0	0.0335943
9337	307.169	2	0	1	0	0	0	0.0333064
9339	307.202	2	0	1	0	0	0	0.0336818
9341	307.236	2	0	1	0	0	0	0.0341344
9343	307.269	2	0	1	0	0	0	0.0340214
9345	307.302	2	0	1	0	0	0	0.0337175
9347	307.336	2	0	1	0	0	0	0.0346637
9349	307.369	2	0	1	0	0	0	0.0345763
9351	307.402	2	0	1	0	0	0	0.0345263
9353	307.436	2	0	1	0	0	0	0.0343621
9355	307.469	2	0	1	0	0	0	0.0340151
9357	307.502	2	0	1	0	0	0	0.0338714
9359	307.536	2	0	1	0	0	0	0.0335971
9361	307.569	2	0	1	0	0	0	0.0337726
9363	307.602	2	0	1	0	0	0	0.033859
9365	307.636	2	0	1	0	0	0	0.033249
9367	307.669	2	0	1	0	0	0	0.0331394
9369	307.702	2	0	1	0	0	0	0.0333444
9371	307.736	2	0	1	0	0	0	0.0336216
9373	307.769	2	0	1	0	0	0	0.033617
9375	307.802	2	0	1	0	0	0	0.0333887
9377	307.836	2	0	1	0	0	0	0.0333711
9379	307.869	2	0	1	0	0	0	0.0335812
9381	307.902	2	0	1	0	0	0	0.0333898
9383	307.936	2	0	1	0	0	0	0.0337743
9385	307.969	2	0	1	0	0	0	0.0339413
9387	308.002	2	0	1	0	0	0	0.0333484
9389	308.036	2	0	1	0	0	0	0.0330303
9391	308.069	2	0	1	0	0	0	0.0325039
9393	308.102	2	0	1	0	0	0	0.0328367
9395	308.136	2	0	1	0	0	0	0.0322114
9397	308.169	2	0	1	0	0	0	0.0326402
9399	308.202	2	0	1	0	0	0	0.0323784
9401	308.236	2	0	1	0	0	0	0.031577
9403	308.269	2	0	1	0	0	0	0.0316866
9405	308.302	2	0	1	0	0	0	0.0323176
9407	308.336	2	0	1	0	0	0	0.0325578
9409	308.369	2	0	1	0	0	0	0.0322375
9411	308.402	2	0	1	0	0	0	0.0323341
9413	308.436	2	0	1	0	0	0	0.0322614
9415	308.469	2	0	1	0	0	0	0.0323301
9417	308.502	2	0	1	0	0	0	0.0328196
9419	308.536	2	0	1	0	0	0	0.0329611
9421	308.569	2	0	1	0	0	0	0.0330497
9423	308.602	2	0	1	0	0	0	0.033023
9425	308.636	2	0	1	0	0	0	0.0326782
9427	308.669	2	0	1	0	0	0	0.0322046
9429	308.702	2	0	1	0	0	0	0.0327055
9431	308.736	2	0	1	0	0	0	0.0332944
9433	308.769	2	0	1	0	0	0	0.0325414
9435	308.802	2	0	1	0	0	0	0.0319899
9437	308.836	2	0	1	0	0	0	0.0316616
9439	308.869	2	0	1	0	0	0	0.0314339
9441	308.902	2	0	1	0	0	0	0.0323005
9443	308.936	2	0	1	0	0	0	0.0328543
9445	308.969	2	0	1	0	0	0	0.0329571
9447	309.002	2	0	1	0	0	0	0.0327134
9449	309.036	2	0	1	0	0	0	0.0323284
9451	309.069	2	0	1	0	0	0	0.0322
9453	309.102	2	0	1	0	0	0	0.0323823
9455	309.136	2	0	1	0	0	0	0.0326998
9457	309.169	2	0	1	0	0	0	0.0329588
9459	309.202	2	0	1	0	0	0	0.0319961
9461	309.236	2	0	1	0	0	0	0.0317519
9463	309.269	2	0	1	0	0	0	0.0319223
9465	309.302	2	0	1	0	0	0	0.0324562
9467	309.336	2	0	1	0	0	0	0.0330122
9469	309.369	2	0	1	0	0	0	0.0334552
9471	309.402	2	0	1	0	0	0	0.0331723
9473	309.436	2	0	1	0	0	0	0.0328781
9475	309.469	2	0	1	0	0	0	0.0326277
9477	309.502	2	0	1	0	0	0	0.0324425
9479	309.536	2	0	1	0	0	0	0.0321211
9481	309.569	2	0	1	0	0	0	0.0320296
9483	309.602	2	0	1	0	0	0	0.0318547
9485	309.636	2	0	1	0	0	0	0.0313498
9487	309.669	2	0	1	0	0	0	0.0314822
9489	309.702	2	0	1	0	0	0	0.0317054
9491	309.736	2	0	1	0	0	0	0.0322966
9493	309.769	2	0	1	0	0	0	0.0330201
9495	309.802	2	0	1	0	0	0	0.0329855
9497	309.836	2	0	1	0	0	0	0.0324102
9499	309.869	2	0	1	0	0	0	0.0328549
9501	309.902	2	0	1	0	0	0	0.0332427
9503	309.936	2	0	1	0	0	0	0.0336795
9505	309.969	2	0	1	0	0	0	0.0336749
9507	310.002	2	0	1	0	0	0	0.0331087
9509	310.036	2	0	1	0	0	0	0.0324971
9511	310.069	2	0	1	0	0	0	0.0324993
9513	310.102	2	0	1	0	0	0	0.0324022
9515	310.136	2	0	1	0	0	0	0.0326521
9517	310.169	2	0	1	0	0	0	0.0331945
9519	310.202	2	0	1	0	0	0	0.0333524
9521	310.236	2	0	1	0	0	0	0.0329185
9523	310.269	2	0	1	0	0	0	0.0325538
9525	310.302	2	0	1	0	0	0	0.0325919
9527	310.336	2	0	1	0	0	0	0.0323846
9529	310.369	2	0	1	0	0	0	0.03207
9531	310.402	2	0	1	0	0	0	0.0326334
9533	310.436	2	0	1	0	0	0	0.0328923
9535	310.469	2	0	1	0	0	0	0.0331371
9537	310.502	2	0	1	0	0	0	0.0329548
9539	310.536	2	0	1	0	0	0	0.0335721
9541	310.569	2	0	1	0	0	0	0.0350556
9543	310.602	2	0	1	0	0	0	0.0348176
9545	310.636	2	0	1	0	0	0	0.0344485
9547	310.669	2	0	1	0	0	0	0.0339958
9549	310.702	2	0	1	0	0	0	0.0338271
9551	310.736	2	0	1	0	0	0	0.0332206
9553	310.769	2	0	1	0	0	0	0.0324107
9555	310.802	2	0	1	0	0	0	0.0327362
9557	310.836	2	0	1	0	0	0	0.0330905
9559	310.869	2	0	1	0	0	0	0.0334154
9561	310.902	2	0	1	0	0	0	0.0339328
9563	310.936	2	0	1	0	0	0	0.0342128
9565	310.969	2	0	1	0	0	0	0.0347756
9567	311.002	2	0	1	0	0	0	0.0346825
9569	311.036	2	0	1	0	0	0	0.0337334
9571	311.069	2	0	1	0	0	0	0.0330235
9573	311.102	2	0	1	0	0	0	0.0331899
9575	311.136	2	0	1	0	0	0	0.032998
9577	311.169	2	0	1	0	0	0	0.0327424
9579	311.202	2	0	1	0	0	0	0.032647
9581	311.236	2	0	1	0	0	0	0.0323909
9583	311.269	2	0	1	0	0	0	0.0321705
9585	311.302	2	0	1	0	0	0	0.0322824
9587	311.336	2	0	1	0	0	0	0.0323778
9589	311.369	2	0	1	0	0	0	0.0322892
9591	311.402	2	0	1	0	0	0	0.0323715
9593	311.435	2	0	1	0	0	0	0.0324846
9595	311.469	2	0	1	0	0	0	0.0321932
9597	311.502	2	0	1	0	0	0	0.0320955
9599	311.535	2	0	1	0	0	0	0.0325317
9601	311.569	2	0	1	0	0	0	0.0325947
9603	311.602	2	0	1	0	0	0	0.032714
9605	311.635	2	0	1	0	0	0	0.0330854
9607	311.669	2	0	1	0	0	0	0.0328702
9609	311.702	2	0	1	0	0	0	0.0328179
9611	311.735	2	0	1	0	0	0	0.0330014
9613	311.769	2	0	1	0	0	0	0.0332638
9615	311.802	2	0	1	0	0	0	0.0333751
9617	311.835	2	0	1	0	0	0	0.0332552
9619	311.869	2	0	1	0	0	0	0.0330019
9621	311.902	2	0	1	0	0	0	0.0325703
9623	311.935	2	0	1	0	0	0	0.032873
9625	311.969	2	0	1	0	0	0	0.0322994
9627	312.002	2	0	1	0	0	0	0.031899
9629	312.035	2	0	1	0	0	0	0.032104
9631	312.069	2	0	1	0	0	0	0.0329934
9633	312.102	2	0	1	0	0	0	0.033692
9635	312.135	2	0	1	0	0	0	0.0335801
9637	312.169	2	0	1	0	0	0	0.0342559
9639	312.202	2	0	1	0	0	0	0.034662
9641	312.235	2	0	1	0	0	0	0.0348165
9643	312.269	2	0	1	0	0	0	0.0351527
9645	312.302	2	0	1	0	0	0	0.035172
9647	312.335	2	0	1	0	0	0	0.0343224
9649	312.369	2	0	1	0	0	0	0.0338351
9651	312.402	2	0	1	0	0	0	0.0337158
9653	312.435	2	0	1	0	0	0	0.0340333
9655	312.469	2	0	1	0	0	0	0.0341452
9657	312.502	2	0	1	0	0	0	0.0339663
9659	312.535	2	0	1	0	0	0	0.033571
9661	312.569	2	0	1	0	0	0	0.033299
9663	312.602	2	0	1	0	0	0	0.0336994
9665	312.635	2	0	1	0	0	0	0.0334052
9667	312.669	2	0	1	0	0	0	0.0332666
9669	312.702	2	0	1	0	0	0	0.0332405
9671	312.735	2	0	1	0	0	0	0.0329872
9673	312.769	2	0	1	0	0	0	0.032902
9675	312.802	2	0	1	0	0	0	0.033186
9677	312.835	2	0	1	0	0	0	0.0333614
9679	312.869	2	0	1	0	0	0	0.0334836
9681	312.902	2	0	1	0	0	0	0.0336948
9683	312.935	2	0	1	0	0	0	0.0338203
9685	312.969	2	0	1	0	0	0	0.0336051
9687	313.002	2	0	1	0	0	0	0.0336284
9689	313.035	2	0	1	0	0	0	0.0337476
9691	313.069	2	0	1	0	0	0	0.0339884
9693	313.102	2	0	1	0	0	0	0.0341668
9695	313.135	2	0	1	0	0	0	0.0337982
9697	313.169	2	0	1	0	0	0	0.0337789
9699	313.202	2	0	1	0	0	0	0.033922
9701	313.235	2	0	1	0	0	0	0.0342173
9703	313.269	2	0	1	0	0	0	0.0341514
9705	313.302	2	0	1	0	0	0	0.0335778
9707	313.335	2	0	1	0	0	0	0.0332445
9709	313.369	2	0	1	0	0	0	0.0329503
9711	313.402	2	0	1	0	0	0	0.0327895
9713	313.435	2	0	1	0	0	0	0.0331519
9715	313.469	2	0	1	0	0	0	0.0331984
9717	313.502	2	0	1	0	0	0	0.0341151
9719	313.535	2	0	1	0	0	0	0.0348392
9721	313.569	2	0	1	0	0	0	0.0352765
9723	313.602	2	0	1	0	0	0	0.0350522
9725	313.635	2	0	1	0	0	0	0.0342929
9727	313.669	2	0	1	0	0	0	0.0340856
9729	313.702	2	0	1	0	0	0	0.0341088
9731	313.735	2	0	1	0	0	0	0.0342713
9733	313.769	2	0	1	0	0	0	0.0342667
9735	313.802	2	0	1	0	0	0	0.0346915
9737	313.835	2	0	1	0	0	0	0.0348767
9739	313.869	2	0	1	0	0	0	0.0348051
9741	313.902	2	0	1	0	0	0	0.0347114
9743	313.935	2	0	1	0	0	0	0.0334398
9745	313.969	2	0	1	0	0	0	0.0326992
9747	314.002	2	0	1	0	0	0	0.0336801
9749	314.035	2	0	1	0	0	0	0.0339867
9751	314.069	2	0	1	0	0	0	0.0341753
9753	314.102	2	0	1	0	0	0	0.0333154
9755	314.135	2	0	1	0	0	0	0.0328106
9757	314.169	2	0	1	0	0	0	0.0330519
9759	314.202	2	0	1	0	0	0	0.0340015
9761	314.235	2	0	1	0	0	0	0.0347302
9763	314.269	2	0	1	0	0	0	0.0346489
9765	314.302	2	0	1	0	0	0	0.0336335
9767	314.335	2	0	1	0	0	0	0.0330599
9769	314.369	2	0	1	0	0	0	0.0329673
9771	314.402	2	0	1	0	0	0	0.0337403
9773	314.435	2	0	1	0	0	0	0.0339975
9775	314.469	2	0	1	0	0	0	0.0345285
9777	314.502	2	0	1	0	0	0	0.0346291
9779	314.535	2	0	1	0	0	0	0.0338039
9781	314.569	2	0	1	0	0	0	0.0334421
9783	314.602	2	0	1	0	0	0	0.0332797
9785	314.635	2	0	1	0	0	0	0.0332382
9787	314.669	2	0	1	0	0	0	0.0328066
9789	314.702	2	0	1	0	0	0	0.0326016
9791	314.735	2	0	1	0	0	0	0.0326771
9793	314.769	2	0	1	0	0	0	0.0326186
9795	314.802	2	0	1	0	0	0	0.0327884
9797	314.835	2	0	1	0	0	0	0.0332541
9799	314.869	2	0	1	0	0	0	0.0336522
9801	314.902	2	0	1	0	0	0	0.0332717
9803	314.935	2	0	1	0	0	0	0.0323789
9805	314.969	2	0	1	0	0	0	0.032267
9807	315.002	2	0	1	0	0	0	0.0322773
9809	315.035	2	0	1	0	0	0	0.0320989
9811	315.069	2	0	1	0	0	0	0.0319677
9813	315.102	2	0	1	0	0	0	0.03179
9815	315.135	2	0	1	0	0	0	0.0319121
9817	315.169	2	0	1	0	0	0	0.0319217
9819	315.202	2	0	1	0	0	0	0.031807
9821	315.235	2	0	1	0	0	0	0.0315037
9823	315.269	2	0	1	0	0	0	0.0316406
9825	315.302	2	0	1	0	0	0	0.0317928
9827	315.335	2	0	1	0	0	0	0.031711
9829	315.369	2	0	1	0	0	0	0.0320081
9831	315.402	2	0	1	0	0	0	0.0327009
9833	315.435	2	0	1	0	0	0	0.0330769
9835	315.469	2	0	1	0	0	0	0.0331252
9837	315.502	2	0	1	0	0	0	0.0324158
9839	315.535	2	0	1	0	0	0	0.0322398
9841	315.569	2	0	1	0	0	0	0.0327129
9843	315.602	2	0	1	0	0	0	0.033111
9845	315.635	2	0	1	0	0	0	0.0334779
9847	315.669	2	0	1	0	0	0	0.0328708
9849	315.702	2	0	1	0	0	0	0.032647
9851	315.735	2	0	1	0	0	0	0.0326237
9853	315.769	2	0	1	0	0	0	0.0327975
9855	315.802	2	0	1	0	0	0	0.0328253
9857	315.835	2	0	1	0	0	0	0.0323721
9859	315.869	2	0	1	0	0	0	0.0332609
9861	315.902	2	0	1	0	0	0	0.0332916
9863	315.935	2	0	1	0	0	0	0.0329673
9865	315.969	2	0	1	0	0	0	0.0330337
9867	316.002	2	0	1	0	0	0	0.0333438
9869	316.035	2	0	1	0	0	0	0.0335426
9871	316.069	2	0	1	0	0	0	0.0334665
9873	316.102	2	0	1	0	0	0	0.033458
9875	316.135	2	0	1	0	0	0	0.0334302
9877	316.169	2	0	1	0	0	0	0.033604
9879	316.202	2	0	1	0	0	0	0.0334841
9881	316.235	2	0	1	0	0	0	0.0324647
9883	316.269	2	0	1	0	0	0	0.0330326
9885	316.302	2	0	1	0	0	0	0.0335375
9887	316.335	2	0	1	0	0	0	0.0337136
9889	316.369	2	0	1	0	0	0	0.0340662
9891	316.402	2	0	1	0	0	0	0.0339708
9893	316.435	2	0	1	0	0	0	0.0341441
9895	316.469	2	0	1	0	0	0	0.0342633
9897	316.502	2	0	1	0	0	0	0.0339271
9899	316.535	2	0	1	0	0	0	0.0334756
9901	316.569	2	0	1	0	0	0	0.0335415
9903	316.602	2	0	1	0	0	0	0.0337721
9905	316.635	2	0	1	0	0	0	0.0332263
9907	316.669	2	0	1	0	0	0	0.0325607
9909	316.702	2	0	1	0	0	0	0.0332427
9911	316.735	2	0	1	0	0	0	0.0337902
9913	316.769	2	0	1	0	0	0	0.0338618
9915	316.802	2	0	1	0	0	0	0.033751
9917	316.835	2	0	1	0	0	0	0.0335176
9919	316.869	2	0	1	0	0	0	0.0336926
9921	316.902	2	0	1	0	0	0	0.0335642
9923	316.935	2	0	1	0	0	0	0.0329735
9925	316.969	2	0	1	0	0	0	0.0320859
9927	317.002	2	0	1	0	0	0	0.0317599
9929	317.035	2	0	1	0	0	0	0.0320081
9931	317.069	2	0	1	0	0	0	0.0319905
9933	317.102	2	0	1	0	0	0	0.0323943
9935	317.135	2	0	1	0	0	0	0.0329639
9937	317.169	2	0	1	0	0	0	0.0324857
9939	317.202	2	0	1	0	0	0	0.0320177
9941	317.235	2	0	1	0	0	0	0.0319632
9943	317.269	2	0	1	0	0	0	0.032551
9945	317.302	2	0	1	0	0	0	0.033324
9947	317.335	2	0	1	0	0	0	0.0329213
9949	317.369	2	0	1	0	0	0	0.0326163
9951	317.402	2	0	1	0	0	0	0.0323051
9953	317.435	2	0	1	0	0	0	0.0320864
9955	317.469	2	0	1	0	0	0	0.0324488
9957	317.502	2	0	1	0	0	0	0.0327237
9959	317.535	2	0	1	0	0	0	0.0332365
9961	317.569	2	0	1	0	0	0	0.0330519
9963	317.602	2	0	1	0	0	0	0.0329395
9965	317.635	2	0	1	0	0	0	0.0326209
9967	317.669	2	0	1	0	0	0	0.031991
9969	317.702	2	0	1	0	0	0	0.0318939
9971	317.735	2	0	1	0	0	0	0.0322267
9973	317.769	2	0	1	0	0	0	0.0327231
9975	317.802	2	0	1	0	0	0	0.032509
9977	317.835	2	0	1	0	0	0	0.0317485
9979	317.869	2	0	1	0	0	0	0.0311834
9981	317.902	2	0	1	0	0	0	0.031176
9983	317.935	2	0	1	0	0	0	0.0318428
9985	317.969	2	0	1	0	0	0	0.0324022
9987	318.002	2	0	1	0	0	0	0.0324459
9989	318.035	2	0	1	0	0	0	0.0322193
9991	318.069	2	0	1	0	0	0	0.0315906
9993	318.102	2	0	1	0	0	0	0.0311232
9995	318.135	2	0	1	0	0	0	0.0312584
9997	318.169	2	0	1	0	0	0	0.0316611
9999	318.202	2	0	1	0	0	0	0.0321665
10001	318.235	2	0	1	0	0	0	0.0320853
10003	318.269	2	0	1	0	0	0	0.0319365
10005	318.302	2	0	1	0	0	0	0.0316321
10007	318.335	2	0	1	0	0	0	0.0315861
10009	318.369	2	0	1	0	0	0	0.0317729
10011	318.402	2	0	1	0	0	0	0.0320524
10013	318.435	2	0	1	0	0	0	0.0324158
10015	318.469	2	0	1	0	0	0	0.0317888
10017	318.502	2	0	1	0	0	0	0.032062
10019	318.535	2	0	1	0	0	0	0.0324289
10021	318.569	2	0	1	0	0	0	0.0323289
10023	318.602	2	0	1	0	0	0	0.0322818
10025	318.635	2	0	1	0	0	0	0.0326822
10027	318.669	2	0	1	0	0	0	0.0328299
10029	318.702	2	0	1	0	0	0	0.0326788
10031	318.735	2	0	1	0	0	0	0.0324164
10033	318.769	2	0	1	0	0	0	0.0325544
10035	318.802	2	0	1	0	0	0	0.0325294
10037	318.835	2	0	1	0	0	0	0.032823
10039	318.869	2	0	1	0	0	0	0.0328747
10041	318.902	2	0	1	0	0	0	0.0325084
10043	318.935	2	0	1	0	0	0	0.0328412
10045	318.969	2	0	1	0	0	0	0.0329281
10047	319.002	2	0	1	0	0	0	0.0326816
10049	319.035	2	0	1	0	0	0	0.0327475
10051	319.069	2	0	1	0	0	0	0.0319848
10053	319.102	2	0	1	0	0	0	0.0317008
10055	319.135	2	0	1	0	0	0	0.0316082
10057	319.169	2	0	1	0	0	0	0.032789
10059	319.202	2	0	1	0	0	0	0.0333836
10061	319.235	2	0	1	0	0	0	0.0335511
10063	319.269	2	0	1	0	0	0	0.0341497
10065	319.302	2	0	1	0	0	0	0.0340515
10067	319.335	2	0	1	0	0	0	0.034169
10069	319.369	2	0	1	0	0	0	0.0339515
10071	319.402	2	0	1	0	0	0	0.0329946
10073	319.435	2	0	1	0	0	0	0.0329974
10075	319.469	2	0	1	0	0	0	0.0331326
10077	319.502	2	0	1	0	0	0	0.033174
10079	319.535	2	0	1	0	0	0	0.0327452
10081	319.569	2	0	1	0	0	0	0.0329253
10083	319.602	2	0	1	0	0	0	0.0331462
10085	319.635	2	0	1	0	0	0	0.0331593
10087	319.669	2	0	1	0	0	0	0.0332836
10089	319.702	2	0	1	0	0	0	0.0328651
10091	319.735	2	0	1	0	0	0	0.0332399
10093	319.768	2	0	1	0	0	0	0.0335863
10095	319.802	2	0	1	0	0	0	0.0335171
10097	319.835	2	0	1	0	0	0	0.0333467
10099	319.868	2	0	1	0	0	0	0.0335733
10101	319.902	2	0	1	0	0	0	0.0337914
10103	319.935	2	0	1	0	0	0	0.0336136
10105	319.968	2	0	1	0	0	0	0.033345
10107	320.002	2	0	1	0	0	0	0.0332598
10109	320.035	2	0	1	0	0	0	0.0333029
10111	320.068	2	0	1	0	0	0	0.0330769
10113	320.102	2	0	1	0	0	0	0.0334569
10115	320.135	2	0	1	0	0	0	0.0337255
10117	320.168	2	0	1	0	0	0	0.0341117
10119	320.202	2	0	1	0	0	0	0.0344172
10121	320.235	2	0	1	0	0	0	0.0334699
10123	320.268	2	0	1	0	0	0	0.0339725
10125	320.302	2	0	1	0	0	0	0.0339629
10127	320.335	2	0	1	0	0	0	0.0341304
10129	320.368	2	0	1	0	0	0	0.0344502
10131	320.402	2	0	1	0	0	0	0.0340021
10133	320.435	2	0	1	0	0	0	0.034156
10135	320.468	2	0	1	0	0	0	0.0345121
10137	320.502	2	0	1	0	0	0	0.0348784
10139	320.535	2	0	1	0	0	0	0.0348472
10141	320.568	2	0	1	0	0	0	0.0335977
10143	320.602	2	0	1	0	0	0	0.033195
10145	320.635	2	0	1	0	0	0	0.0328639
10147	320.668	2	0	1	0	0	0	0.0327327
10149	320.702	2	0	1	0	0	0	0.0333705
10151	320.735	2	0	1	0	0	0	0.0333563
10153	320.768	2	0	1	0	0	0	0.0334796
10155	320.802	2	0	1	0	0	0	0.034524
10157	320.835	2	0	1	0	0	0	0.0349641
10159	320.868	2	0	1	0	0	0	0.0346853
10161	320.902	2	0	1	0	0	0	0.0349534
10163	320.935	2	0	1	0	0	0	0.0367463
10165	320.968	2	0	1	0	0	0	0.0356877
10167	321.002	2	0	1	0	0	0	0.0350261
10169	321.035	2	0	1	0	0	0	0.0351919
10171	321.068	2	0	1	0	0	0	0.035807
10173	321.102	2	0	1	0	0	0	0.0361909
10175	321.135	2	0	1	0	0	0	0.0356218
10177	321.168	2	0	1	0	0	0	0.0349113
10179	321.202	2	0	1	0	0	0	0.0348767
10181	321.235	2	0	1	0	0	0	0.0355025
10183	321.268	2	0	1	0	0	0	0.0356832
10185	321.302	2	0	1	0	0	0	0.0354963
10187	321.335	2	0	1	0	0	0	0.0353469
10189	321.368	2	0	1	0	0	0	0.0353532
10191	321.402	2	0	1	0	0	0	0.036748
10193	321.435	2	0	1	0	0	0	0.0371189
10195	321.468	2	0	1	0	0	0	0.0375073
10197	321.502	2	0	1	0	0	0	0.0373603
10199	321.535	2	0	1	0	0	0	0.0371126
10201	321.568	2	0	1	0	0	0	0.0369582
10203	321.602	2	0	1	0	0	0	0.0365578
10205	321.635	2	0	1	0	0	0	0.0352209
10207	321.668	2	0	1	0	0	0	0.0351379
10209	321.702	2	0	1	0	0	0	0.0351283
10211	321.735	2	0	1	0	0	0	0.0346421
10213	321.768	2	0	1	0	0	0	0.0347801
10215	321.802	2	0	1	0	0	0	0.0346898
10217	321.835	2	0	1	0	0	0	0.0345615
10219	321.868	2	0	1	0	0	0	0.0333921
10221	321.902	2	0	1	0	0	0	0.0326498
10223	321.935	2	0	1	0	0	0	0.032831
10225	321.968	2	0	1	0	0	0	0.0328509
10227	322.002	2	0	1	0	0	0	0.0333228
10229	322.035	2	0	1	0	0	0	0.0342593
10231	322.068	2	0	1	0	0	0	0.0339561
10233	322.102	2	0	1	0	0	0	0.0332984
10235	322.135	2	0	1	0	0	0	0.0329213
10237	322.168	2	0	1	0	0	0	0.0329821
10239	322.202	2	0	1	0	0	0	0.033278
10241	322.235	2	0	1	0	0	0	0.0335278
10243	322.268	2	0	1	0	0	0	0.0336261
10245	322.302	2	0	1	0	0	0	0.0334932
10247	322.335	2	0	1	0	0	0	0.0331769
10249	322.368	2	0	1	0	0	0	0.0331814
10251	322.402	2	0	1	0	0	0	0.0332041
10253	322.435	2	0	1	0	0	0	0.033441
10255	322.468	2	0	1	0	0	0	0.0336255
10257	322.502	2	0	1	0	0	0	0.0326777
10259	322.535	2	0	1	0	0	0	0.0332149
10261	322.568	2	0	1	0	0	0	0.0333609
10263	322.602	2	0	1	0	0	0	0.0335534
10265	322.635	2	0	1	0	0	0	0.0336857
10267	322.668	2	0	1	0	0	0	0.0340873
10269	322.702	2	0	1	0	0	0	0.0344933
10271	322.735	2	0	1	0	0	0	0.0344417
10273	322.768	2	0	1	0	0	0	0.03416
10275	322.802	2	0	1	0	0	0	0.0334926
10277	322.835	2	0	1	0	0	0	0.0334796
10279	322.868	2	0	1	0	0	0	0.0339441
10281	322.902	2	0	1	0	0	0	0.0339669
10283	322.935	2	0	1	0	0	0	0.0338067
10285	322.968	2	0	1	0	0	0	0.033199
10287	323.002	2	0	1	0	0	0	0.032233
10289	323.035	2	0	1	0	0	0	0.0319916
10291	323.068	2	0	1	0	0	0	0.0319047
10293	323.102	2	0	1	0	0	0	0.0322125
10295	323.135	2	0	1	0	0	0	0.0325436
10297	323.168	2	0	1	0	0	0	0.0335006
10299	323.202	2	0	1	0	0	0	0.0337908
10301	323.235	2	0	1	0	0	0	0.0334478
10303	323.268	2	0	1	0	0	0	0.0329145
10305	323.302	2	0	1	0	0	0	0.0326987
10307	323.335	2	0	1	0	0	0	0.0328043
10309	323.368	2	0	1	0	0	0	0.0330832
10311	323.402	2	0	1	0	0	0	0.032823
10313	323.435	2	0	1	0	0	0	0.0327884
10315	323.468	2	0	1	0	0	0	0.0328088
10317	323.502	2	0	1	0	0	0	0.0329656
10319	323.535	2	0	1	0	0	0	0.0329457
10321	323.568	2	0	1	0	0	0	0.0325607
10323	323.602	2	0	1	0	0	0	0.0327805
10325	323.635	2	0	1	0	0	0	0.0328043
10327	323.668	2	0	1	0	0	0	0.033253
10329	323.702	2	0	1	0	0	0	0.033249
10331	323.735	2	0	1	0	0	0	0.0335029
10333	323.768	2	0	1	0	0	0	0.0337726
10335	323.802	2	0	1	0	0	0	0.0341622
10337	323.835	2	0	1	0	0	0	0.0338243
10339	323.868	2	0	1	0	0	0	0.0337363
10341	323.902	2	0	1	0	0	0	0.0336715
10343	323.935	2	0	1	0	0	0	0.0341832
10345	323.968	2	0	1	0	0	0	0.0345195
10347	324.002	2	0	1	0	0	0	0.0344894
10349	324.035	2	0	1	0	0	0	0.0343309
10351	324.068	2	0	1	0	0	0	0.0338981
10353	324.102	2	0	1	0	0	0	0.0339788
10355	324.135	2	0	1	0	0	0	0.0341747
10357	324.168	2	0	1	0	0	0	0.0339345
10359	324.202	2	0	1	0	0	0	0.033855
10361	324.235	2	0	1	0	0	0	0.033157
10363	324.268	2	0	1	0	0	0	0.0329946
10365	324.302	2	0	1	0	0	0	0.0332405
10367	324.335	2	0	1	0	0	0	0.0339373
10369	324.368	2	0	1	0	0	0	0.0345268
10371	324.402	2	0	1	0	0	0	0.0345626
10373	324.435	2	0	1	0	0	0	0.0346512
10375	324.468	2	0	1	0	0	0	0.0346347
10377	324.502	2	0	1	0	0	0	0.0346728
10379	324.535	2	0	1	0	0	0	0.0347137
10381	324.568	2	0	1	0	0	0	0.0343451
10383	324.602	2	0	1	0	0	0	0.0343468
10385	324.635	2	0	1	0	0	0	0.034549
10387	324.668	2	0	1	0	0	0	0.0348835
10389	324.702	2	0	1	0	0	0	0.0352322
10391	324.735	2	0	1	0	0	0	0.0351697
10393	324.768	2	0	1	0	0	0	0.0351362
10395	324.802	2	0	1	0	0	0	0.0350931
10397	324.835	2	0	1	0	0	0	0.0352333
10399	324.868	2	0	1	0	0	0	0.0353697
10401	324.902	2	0	1	0	0	0	0.0352413
10403	324.935	2	0	1	0	0	0	0.0350811
10405	324.968	2	0	1	0	0	0	0.0353083
10407	325.002	2	0	1	0	0	0	0.0358251
10409	325.035	2	0	1	0	0	0	0.0356712
10411	325.068	2	0	1	0	0	0	0.0352776
10413	325.102	2	0	1	0	0	0	0.0352703
10415	325.135	2	0	1	0	0	0	0.0353026
10417	325.168	2	0	1	0	0	0	0.0353839
10419	325.202	2	0	1	0	0	0	0.0354032
10421	325.235	2	0	1	0	0	0	0.035314
10423	325.268	2	0	1	0	0	0	0.0352504
10425	325.302	2	0	1	0	0	0	0.0349636
10427	325.335	2	0	1	0	0	0	0.0344303
10429	325.368	2	0	1	0	0	0	0.0342588
10431	325.402	2	0	1	0	0	0	0.0340975
10433	325.435	2	0	1	0	0	0	0.0340856
10435	325.468	2	0	1	0	0	0	0.034018
10437	325.502	2	0	1	0	0	0	0.0339084
10439	325.535	2	0	1	0	0	0	0.0338181
10441	325.568	2	0	1	0	0	0	0.0333933
10443	325.602	2	0	1	0	0	0	0.0334074
10445	325.635	2	0	1	0	0	0	0.033224
10447	325.668	2	0	1	0	0	0	0.0334086
10449	325.702	2	0	1	0	0	0	0.0334864
10451	325.735	2	0	1	0	0	0	0.033128
10453	325.768	2	0	1	0	0	0	0.0331922
10455	325.802	2	0	1	0	0	0	0.0336255
10457	325.835	2	0	1	0	0	0	0.0343724
10459	325.868	2	0	1	0	0	0	0.0345978
10461	325.902	2	0	1	0	0	0	0.0348057
10463	325.935	2	0	1	0	0	0	0.0347909
10465	325.968	2	0	1	0	0	0	0.034248
10467	326.002	2	0	1	0	0	0	0.033358
10469	326.035	2	0	1	0	0	0	0.0335046
10471	326.068	2	0	1	0	0	0	0.0334722
10473	326.102	2	0	1	0	0	0	0.0329105
10475	326.135	2	0	1	0	0	0	0.033391
10477	326.168	2	0	1	0	0	0	0.033989
10479	326.202	2	0	1	0	0	0	0.0343019
10481	326.235	2	0	1	0	0	0	0.0342258
10483	326.268	2	0	1	0	0	0	0.0341991
10485	326.302	2	0	1	0	0	0	0.0344451
10487	326.335	2	0	1	0	0	0	0.0340799
10489	326.368	2	0	1	0	0	0	0.033132
10491	326.402	2	0	1	0	0	0	0.0332626
10493	326.435	2	0	1	0	0	0	0.0337181
10495	326.468	2	0	1	0	0	0	0.0338198
10497	326.502	2	0	1	0	0	0	0.0335199
10499	326.535	2	0	1	0	0	0	0.0325283
10501	326.568	2	0	1	0	0	0	0.0322426
10503	326.602	2	0	1	0	0	0	0.0324141
10505	326.635	2	0	1	0	0	0	0.0326538
10507	326.668	2	0	1	0	0	0	0.032091
10509	326.702	2	0	1	0	0	0	0.0315742
10511	326.735	2	0	1	0	0	0	0.0316276
10513	326.768	2	0	1	0	0	0	0.032597
10515	326.802	2	0	1	0	0	0	0.0333762
10517	326.835	2	0	1	0	0	0	0.0328287
10519	326.868	2	0	1	0	0	0	0.0321455
10521	326.902	2	0	1	0	0	0	0.0321103
10523	326.935	2	0	1	0	0	0	0.032175
10525	326.968	2	0	1	0	0	0	0.0328736
10527	327.002	2	0	1	0	0	0	0.0333075
10529	327.035	2	0	1	0	0	0	0.0333234
10531	327.068	2	0	1	0	0	0	0.0331314
10533	327.102	2	0	1	0	0	0	0.0326964
10535	327.135	2	0	1	0	0	0	0.0326476
10537	327.168	2	0	1	0	0	0	0.0326271
10539	327.202	2	0	1	0	0	0	0.0327004
10541	327.235	2	0	1	0	0	0	0.0324403
10543	327.268	2	0	1	0	0	0	0.0320779
10545	327.302	2	0	1	0	0	0	0.0328321
10547	327.335	2	0	1	0	0	0	0.0336539
10549	327.368	2	0	1	0	0	0	0.0341543
10551	327.402	2	0	1	0	0	0	0.0338692
10553	327.435	2	0	1	0	0	0	0.0335296
10555	327.468	2	0	1	0	0	0	0.0335489
10557	327.502	2	0	1	0	0	0	0.0334171
10559	327.535	2	0	1	0	0	0	0.0333098
10561	327.568	2	0	1	0	0	0	0.0327589
10563	327.602	2	0	1	0	0	0	0.032501
10565	327.635	2	0	1	0	0	0	0.0323863
10567	327.668	2	0	1	0	0	0	0.0322977
10569	327.702	2	0	1	0	0	0	0.0324255
10571	327.735	2	0	1	0	0	0	0.0328037
10573	327.768	2	0	1	0	0	0	0.033023
10575	327.802	2	0	1	0	0	0	0.0333518
10577	327.835	2	0	1	0	0	0	0.0338448
10579	327.868	2	0	1	0	0	0	0.0341157
10581	327.902	2	0	1	0	0	0	0.0337312
10583	327.935	2	0	1	0	0	0	0.033182
10585	327.968	2	0	1	0	0	0	0.0335466
10587	328.002	2	0	1	0	0	0	0.0341123
10589	328.035	2	0	1	0	0	0	0.0342224
10591	328.068	2	0	1	0	0	0	0.0338459
10593	328.102	2	0	1	0	0	0	0.0334853
10595	328.135	2	0	1	0	0	0	0.0339163
10597	328.168	2	0	1	0	0	0	0.0348352
10599	328.202	2	0	1	0	0	0	0.0350897
10601	328.235	2	0	1	0	0	0	0.0349375
10603	328.268	2	0	1	0	0	0	0.0343059
10605	328.302	2	0	1	0	0	0	0.0346342
10607	328.335	2	0	1	0	0	0	0.034503
10609	328.368	2	0	1	0	0	0	0.0344019
10611	328.402	2	0	1	0	0	0	0.0346274
10613	328.435	2	0	1	0	0	0	0.0344519
10615	328.468	2	0	1	0	0	0	0.0345422
10617	328.501	2	0	1	0	0	0	0.0346853
10619	328.535	2	0	1	0	0	0	0.0347614
10621	328.568	2	0	1	0	0	0	0.0351743
10623	328.601	2	0	1	0	0	0	0.0348511
10625	328.635	2	0	1	0	0	0	0.0343536
10627	328.668	2	0	1	0	0	0	0.0346864
10629	328.701	2	0	1	0	0	0	0.0350772
10631	328.735	2	0	1	0	0	0	0.0348171
10633	328.768	2	0	1	0	0	0	0.0348364
10635	328.801	2	0	1	0	0	0	0.0346171
10637	328.835	2	0	1	0	0	0	0.0342645
10639	328.868	2	0	1	0	0	0	0.0343979
10641	328.901	2	0	1	0	0	0	0.0345195
10643	328.935	2	0	1	0	0	0	0.034495
10645	328.968	2	0	1	0	0	0	0.0345842
10647	329.001	2	0	1	0	0	0	0.0342849
10649	329.035	2	0	1	0	0	0	0.0344178
10651	329.068	2	0	1	0	0	0	0.0343354
10653	329.101	2	0	1	0	0	0	0.0346461
10655	329.135	2	0	1	0	0	0	0.035661
10657	329.168	2	0	1	0	0	0	0.0350851
10659	329.201	2	0	1	0	0	0	0.0349034
10661	329.235	2	0	1	0	0	0	0.0349255
10663	329.268	2	0	1	0	0	0	0.0346722
10665	329.301	2	0	1	0	0	0	0.0348653
10667	329.335	2	0	1	0	0	0	0.0350675
10669	329.368	2	0	1	0	0	0	0.0351538
10671	329.401	2	0	1	0	0	0	0.0350158
10673	329.435	2	0	1	0	0	0	0.0346762
10675	329.468	2	0	1	0	0	0	0.034687
10677	329.501	2	0	1	0	0	0	0.0344945
10679	329.535	2	0	1	0	0	0	0.0348278
10681	329.568	2	0	1	0	0	0	0.0349977
10683	329.601	2	0	1	0	0	0	0.0343133
10685	329.635	2	0	1	0	0	0	0.0335284
10687	329.668	2	0	1	0	0	0	0.0328679
10689	329.701	2	0	1	0	0	0	0.0334148
10691	329.735	2	0	1	0	0	0	0.0334773
10693	329.768	2	0	1	0	0	0	0.0334432
10695	329.801	2	0	1	0	0	0	0.0332195
10697	329.835	2	0	1	0	0	0	0.0331843
10699	329.868	2	0	1	0	0	0	0.0332229
10701	329.901	2	0	1	0	0	0	0.0334841
10703	329.935	2	0	1	0	0	0	0.0341151
10705	329.968	2	0	1	0	0	0	0.0341895
10707	330.001	2	0	1	0	0	0	0.034298
10709	330.035	2	0	1	0	0	0	0.0343593
10711	330.068	2	0	1	0	0	0	0.0343627
10713	330.101	2	0	1	0	0	0	0.0343173
10715	330.135	2	0	1	0	0	0	0.0354991
10717	330.168	2	0	1	0	0	0	0.0350084
10719	330.201	2	0	1	0	0	0	0.0344683
10721	330.235	2	0	1	0	0	0	0.0347693
10723	330.268	2	0	1	0	0	0	0.0349034
10725	330.301	2	0	1	0	0	0	0.0349386
10727	330.335	2	0	1	0	0	0	0.0348148
10729	330.368	2	0	1	0	0	0	0.0346308
10731	330.401	2	0	1	0	0	0	0.0351249
10733	330.435	2	0	1	0	0	0	0.0351953
10735	330.468	2	0	1	0	0	0	0.0354957
10737	330.501	2	0	1	0	0	0	0.0353293
10739	330.535	2	0	1	0	0	0	0.0351896
10741	330.568	2	0	1	0	0	0	0.03554
10743	330.601	2	0	1	0	0	0	0.0352458
10745	330.635	2	0	1	0	0	0	0.0345626
10747	330.668	2	0	1	0	0	0	0.0344116
10749	330.701	2	0	1	0	0	0	0.0347864
10751	330.735	2	0	1	0	0	0	0.0354605
10753	330.768	2	0	1	0	0	0	0.0362062
10755	330.801	2	0	1	0	0	0	0.0359876
10757	330.835	2	0	1	0	0	0	0.0354418
10759	330.868	2	0	1	0	0	0	0.0352532
10761	330.901	2	0	1	0	0	0	0.0348142
10763	330.935	2	0	1	0	0	0	0.035038
10765	330.968	2	0	1	0	0	0	0.0350488
10767	331.001	2	0	1	0	0	0	0.0349801
10769	331.035	2	0	1	0	0	0	0.0347472
10771	331.068	2	0	1	0	0	0	0.0344246
10773	331.101	2	0	1	0	0	0	0.034457
10775	331.135	2	0	1	0	0	0	0.0344422
10777	331.168	2	0	1	0	0	0	0.0346563
10779	331.201	2	0	1	0	0	0	0.0349022
10781	331.235	2	0	1	0	0	0	0.0351453
10783	331.268	2	0	1	0	0	0	0.0344502
10785	331.301	2	0	1	0	0	0	0.034039
10787	331.335	2	0	1	0	0	0	0.0343797
10789	331.368	2	0	1	0	0	0	0.0348074
10791	331.401	2	0	1	0	0	0	0.0352152
10793	331.435	2	0	1	0	0	0	0.0349261
10795	331.468	2	0	1	0	0	0	0.0345575
10797	331.501	2	0	1	0	0	0	0.0346654
10799	331.535	2	0	1	0	0	0	0.0347955
10801	331.568	2	0	1	0	0	0	0.0351379
10803	331.601	2	0	1	0	0	0	0.0352731
10805	331.635	2	0	1	0	0	0	0.0347676
10807	331.668	2	0	1	0	0	0	0.0347404
10809	331.701	2	0	1	0	0	0	0.0344973
10811	331.735	2	0	1	0	0	0	0.0343922
10813	331.768	2	0	1	0	0	0	0.0348034
10815	331.801	2	0	1	0	0	0	0.0349335
10817	331.835	2	0	1	0	0	0	0.0343695
10819	331.868	2	0	1	0	0	0	0.0337465
10821	331.901	2	0	1	0	0	0	0.0333796
10823	331.935	2	0	1	0	0	0	0.0333859
10825	331.968	2	0	1	0	0	0	0.0336022
10827	332.001	2	0	1	0	0	0	0.0341157
10829	332.035	2	0	1	0	0	0	0.0345115
10831	332.068	2	0	1	0	0	0	0.034984
10833	332.101	2	0	1	0	0	0	0.035122
10835	332.135	2	0	1	0	0	0	0.0351817
10837	332.168	2	0	1	0	0	0	0.0351578
10839	332.201	2	0	1	0	0	0	0.0351152
10841	332.235	2	0	1	0	0	0	0.0346921
10843	332.268	2	0	1	0	0	0	0.033972
10845	332.301	2	0	1	0	0	0	0.0340271
10847	332.335	2	0	1	0	0	0	0.0339794
10849	332.368	2	0	1	0	0	0	0.0338095
10851	332.401	2	0	1	0	0	0	0.0337476
10853	332.435	2	0	1	0	0	0	0.0337187
10855	332.468	2	0	1	0	0	0	0.0336715
10857	332.501	2	0	1	0	0	0	0.0339157
10859	332.535	2	0	1	0	0	0	0.0346353
10861	332.568	2	0	1	0	0	0	0.0336766
10863	332.601	2	0	1	0	0	0	0.0328583
10865	332.635	2	0	1	0	0	0	0.0327464
10867	332.668	2	0	1	0	0	0	0.03332
10869	332.701	2	0	1	0	0	0	0.0338555
10871	332.735	2	0	1	0	0	0	0.0330798
10873	332.768	2	0	1	0	0	0	0.0320149
10875	332.801	2	0	1	0	0	0	0.0316503
10877	332.835	2	0	1	0	0	0	0.0316951
10879	332.868	2	0	1	0	0	0	0.0319893
10881	332.901	2	0	1	0	0	0	0.0323897
10883	332.935	2	0	1	0	0	0	0.0331877
10885	332.968	2	0	1	0	0	0	0.0333348
10887	333.001	2	0	1	0	0	0	0.0327469
10889	333.035	2	0	1	0	0	0	0.0324721
10891	333.068	2	0	1	0	0	0	0.0325198
10893	333.101	2	0	1	0	0	0	0.0325328
10895	333.135	2	0	1	0	0	0	0.0329327
10897	333.168	2	0	1	0	0	0	0.0330644
10899	333.201	2	0	1	0	0	0	0.0327663
10901	333.235	2	0	1	0	0	0	0.0323437
10903	333.268	2	0	1	0	0	0	0.0326845
10905	333.301	2	0	1	0	0	0	0.0331689
10907	333.335	2	0	1	0	0	0	0.0330434
10909	333.368	2	0	1	0	0	0	0.0325874
10911	333.401	2	0	1	0	0	0	0.0320615
10913	333.435	2	0	1	0	0	0	0.0316247
10915	333.468	2	0	1	0	0	0	0.0317843
10917	333.501	2	0	1	0	0	0	0.0323272
10919	333.535	2	0	1	0	0	0	0.032973
10921	333.568	2	0	1	0	0	0	0.0332138
10923	333.601	2	0	1	0	0	0	0.0331928
10925	333.635	2	0	1	0	0	0	0.033429
10927	333.668	2	0	1	0	0	0	0.0333756
10929	333.701	2	0	1	0	0	0	0.0333955
10931	333.735	2	0	1	0	0	0	0.0333717
10933	333.768	2	0	1	0	0	0	0.0334165
10935	333.801	2	0	1	0	0	0	0.0332825
10937	333.835	2	0	1	0	0	0	0.0331473
10939	333.868	2	0	1	0	0	0	0.0325811
10941	333.901	2	0	1	0	0	0	0.0321415
10943	333.935	2	0	1	0	0	0	0.0319785
10945	333.968	2	0	1	0	0	0	0.031807
10947	334.001	2	0	1	0	0	0	0.031966
10949	334.035	2	0	1	0	0	0	0.0322801
10951	334.068	2	0	1	0	0	0	0.0324261
10953	334.101	2	0	1	0	0	0	0.0322852
10955	334.135	2	0	1	0	0	0	0.0324351
10957	334.168	2	0	1	0	0	0	0.0323659
10959	334.201	2	0	1	0	0	0	0.0323664
10961	334.235	2	0	1	0	0	0	0.0327015
10963	334.268	2	0	1	0	0	0	0.0326884
10965	334.301	2	0	1	0	0	0	0.0326805
10967	334.335	2	0	1	0	0	0	0.0323437
10969	334.368	2	0	1	0	0	0	0.032024
10971	334.401	2	0	1	0	0	0	0.0320132
10973	334.435	2	0	1	0	0	0	0.0319257
10975	334.468	2	0	1	0	0	0	0.0328878
10977	334.501	2	0	1	0	0	0	0.0333915
10979	334.535	2	0	1	0	0	0	0.0335097
10981	334.568	2	0	1	0	0	0	0.0335097
10983	334.601	2	0	1	0	0	0	0.0333461
10985	334.635	2	0	1	0	0	0	0.0335506
10987	334.668	2	0	1	0	0	0	0.0332961
10989	334.701	2	0	1	0	0	0	0.0330548
10991	334.735	2	0	1	0	0	0	0.0327316
10993	334.768	2	0	1	0	0	0	0.0331241
10995	334.801	2	0	1	0	0	0	0.0333955
10997	334.835	2	0	1	0	0	0	0.0334864
10999	334.868	2	0	1	0	0	0	0.0333722
11001	334.901	2	0	1	0	0	0	0.0334137
11003	334.935	2	0	1	0	0	0	0.0337516
11005	334.968	2	0	1	0	0	0	0.033667
11007	335.001	2	0	1	0	0	0	0.0338828
11009	335.035	2	0	1	0	0	0	0.0336818
11011	335.068	2	0	1	0	0	0	0.0341066
11013	335.101	2	0	1	0	0	0	0.0341293
11015	335.135	2	0	1	0	0	0	0.0341918
11017	335.168	2	0	1	0	0	0	0.0339686
11019	335.201	2	0	1	0	0	0	0.0341424
11021	335.235	2	0	1	0	0	0	0.0341554
11023	335.268	2	0	1	0	0	0	0.0339646
11025	335.301	2	0	1	0	0	0	0.0338561
11027	335.335	2	0	1	0	0	0	0.0338431
11029	335.368	2	0	1	0	0	0	0.0337868
11031	335.401	2	0	1	0	0	0	0.033688
11033	335.435	2	0	1	0	0	0	0.0331081
11035	335.468	2	0	1	0	0	0	0.0327583
11037	335.501	2	0	1	0	0	0	0.0328611
11039	335.535	2	0	1	0	0	0	0.0323573
11041	335.568	2	0	1	0	0	0	0.0315236
11043	335.601	2	0	1	0	0	0	0.0312692
11045	335.635	2	0	1	0	0	0	0.0312198
11047	335.668	2	0	1	0	0	0	0.0321376
11049	335.701	2	0	1	0	0	0	0.033153
11051	335.735	2	0	1	0	0	0	0.0336994
11053	335.768	2	0	1	0	0	0	0.0336568
11055	335.801	2	0	1	0	0	0	0.0336891
11057	335.835	2	0	1	0	0	0	0.0331894
11059	335.868	2	0	1	0	0	0	0.0328912
11061	335.901	2	0	1	0	0	0	0.0330082
11063	335.935	2	0	1	0	0	0	0.0334205
11065	335.968	2	0	1	0	0	0	0.0336698
11067	336.001	2	0	1	0	0	0	0.0335716
11069	336.035	2	0	1	0	0	0	0.0332178
11071	336.068	2	0	1	0	0	0	0.0330116
11073	336.101	2	0	1	0	0	0	0.0334773
11075	336.135	2	0	1	0	0	0	0.0338902
11077	336.168	2	0	1	0	0	0	0.0336556
11079	336.201	2	0	1	0	0	0	0.0331064
11081	336.234	2	0	1	0	0	0	0.0327061
11083	336.268	2	0	1	0	0	0	0.0329554
11085	336.301	2	0	1	0	0	0	0.033479
11087	336.334	2	0	1	0	0	0	0.0333933
11089	336.368	2	0	1	0	0	0	0.0331025
11091	336.401	2	0	1	0	0	0	0.0331206
11093	336.434	2	0	1	0	0	0	0.033149
11095	336.468	2	0	1	0	0	0	0.0333421
11097	336.501	2	0	1	0	0	0	0.0334631
11099	336.534	2	0	1	0	0	0	0.0336017
11101	336.568	2	0	1	0	0	0	0.0335994
11103	336.601	2	0	1	0	0	0	0.0338289
11105	336.634	2	0	1	0	0	0	0.0341991
11107	336.668	2	0	1	0	0	0	0.0341424
11109	336.701	2	0	1	0	0	0	0.0345439
11111	336.734	2	0	1	0	0	0	0.033847
11113	336.768	2	0	1	0	0	0	0.0332882
11115	336.801	2	0	1	0	0	0	0.0331235
11117	336.834	2	0	1	0	0	0	0.0333348
11119	336.868	2	0	1	0	0	0	0.033341
11121	336.901	2	0	1	0	0	0	0.0332274
11123	336.934	2	0	1	0	0	0	0.0338203
11125	336.968	2	0	1	0	0	0	0.034114
11127	337.001	2	0	1	0	0	0	0.0338669
11129	337.034	2	0	1	0	0	0	0.0333001
11131	337.068	2	0	1	0	0	0	0.03327
11133	337.101	2	0	1	0	0	0	0.0339106
11135	337.134	2	0	1	0	0	0	0.0346898
11137	337.168	2	0	1	0	0	0	0.0347478
11139	337.201	2	0	1	0	0	0	0.0349534
11141	337.234	2	0	1	0	0	0	0.0350732
11143	337.268	2	0	1	0	0	0	0.0351601
11145	337.301	2	0	1	0	0	0	0.0355202
11147	337.334	2	0	1	0	0	0	0.0356105
11149	337.368	2	0	1	0	0	0	0.0359728
11151	337.401	2	0	1	0	0	0	0.0372682
11153	337.434	2	0	1	0	0	0	0.0367923
11155	337.468	2	0	1	0	0	0	0.036656
11157	337.501	2	0	1	0	0	0	0.0365157
11159	337.534	2	0	1	0	0	0	0.0365373
11161	337.568	2	0	1	0	0	0	0.0364436
11163	337.601	2	0	1	0	0	0	0.0360273
11165	337.634	2	0	1	0	0	0	0.0361171
11167	337.668	2	0	1	0	0	0	0.0361108
11169	337.701	2	0	1	0	0	0	0.0359342
11171	337.734	2	0	1	0	0	0	0.036071
11173	337.768	2	0	1	0	0	0	0.0358581
11175	337.801	2	0	1	0	0	0	0.0359989
11177	337.834	2	0	1	0	0	0	0.0361063
11179	337.868	2	0	1	0	0	0	0.0359143
11181	337.901	2	0	1	0	0	0	0.0356099
11183	337.934	2	0	1	0	0	0	0.0351697
11185	337.968	2	0	1	0	0	0	0.0347569
11187	338.001	2	0	1	0	0	0	0.0346347
11189	338.034	2	0	1	0	0	0	0.0346796
11191	338.068	2	0	1	0	0	0	0.0345161
11193	338.101	2	0	1	0	0	0	0.034712
11195	338.134	2	0	1	0	0	0	0.0344661
11197	338.168	2	0	1	0	0	0	0.0340157
11199	338.201	2	0	1	0	0	0	0.0340356
11201	338.234	2	0	1	0	0	0	0.0339067
11203	338.268	2	0	1	0	0	0	0.0338408
11205	338.301	2	0	1	0	0	0	0.0338629
11207	338.334	2	0	1	0	0	0	0.034148
11209	338.368	2	0	1	0	0	0	0.0343928
11211	338.401	2	0	1	0	0	0	0.0343014
11213	338.434	2	0	1	0	0	0	0.034219
11215	338.468	2	0	1	0	0	0	0.0335574
11217	338.501	2	0	1	0	0	0	0.0337414
11219	338.534	2	0	1	0	0	0	0.0334069
11221	338.568	2	0	1	0	0	0	0.0335591
11223	338.601	2	0	1	0	0	0	0.0332331
11225	338.634	2	0	1	0	0	0	0.0328872
11227	338.668	2	0	1	0	0	0	0.033065
11229	338.701	2	0	1	0	0	0	0.0327299
11231	338.734	2	0	1	0	0	0	0.0328344
11233	338.768	2	0	1	0	0	0	0.0334324
11235	338.801	2	0	1	0	0	0	0.0335716
11237	338.834	2	0	1	0	0	0	0.0330945
11239	338.868	2	0	1	0	0	0	0.0329406
11241	338.901	2	0	1	0	0	0	0.033312
11243	338.934	2	0	1	0	0	0	0.0337834
11245	338.968	2	0	1	0	0	0	0.0338612
11247	339.001	2	0	1	0	0	0	0.0338056
11249	339.034	2	0	1	0	0	0	0.0334546
11251	339.068	2	0	1	0	0	0	0.0331894
11253	339.101	2	0	1	0	0	0	0.0331314
11255	339.134	2	0	1	0	0	0	0.0331127
11257	339.168	2	0	1	0	0	0	0.0334853
11259	339.201	2	0	1	0	0	0	0.0334926
11261	339.234	2	0	1	0	0	0	0.0332547
11263	339.268	2	0	1	0	0	0	0.033157
11265	339.301	2	0	1	0	0	0	0.0332132
11267	339.334	2	0	1	0	0	0	0.0335091
11269	339.368	2	0	1	0	0	0	0.0333365
11271	339.401	2	0	1	0	0	0	0.0335108
11273	339.434	2	0	1	0	0	0	0.0339118
11275	339.468	2	0	1	0	0	0	0.0339919
11277	339.501	2	0	1	0	0	0	0.0339424
11279	339.534	2	0	1	0	0	0	0.0339362
11281	339.568	2	0	1	0	0	0	0.0339396
11283	339.601	2	0	1	0	0	0	0.0343315
11285	339.634	2	0	1	0	0	0	0.0340759
11287	339.668	2	0	1	0	0	0	0.0339464
11289	339.701	2	0	1	0	0	0	0.0338413
11291	339.734	2	0	1	0	0	0	0.033341
11293	339.768	2	0	1	0	0	0	0.0328634
11295	339.801	2	0	1	0	0	0	0.0330224
11297	339.834	2	0	1	0	0	0	0.0332246
11299	339.868	2	0	1	0	0	0	0.0333779
11301	339.901	2	0	1	0	0	0	0.0333342
11303	339.934	2	0	1	0	0	0	0.0335171
11305	339.968	2	0	1	0	0	0	0.0336011
11307	340.001	2	0	1	0	0	0	0.0334847
11309	340.034	2	0	1	0	0	0	0.0338976
11311	340.068	2	0	1	0	0	0	0.0338181
11313	340.101	2	0	1	0	0	0	0.0339316
11315	340.134	2	0	1	0	0	0	0.0340793
11317	340.168	2	0	1	0	0	0	0.0337902
11319	340.201	2	0	1	0	0	0	0.0339209
11321	340.234	2	0	1	0	0	0	0.034064
11323	340.268	2	0	1	0	0	0	0.0338913
11325	340.301	2	0	1	0	0	0	0.0334887
11327	340.334	2	0	1	0	0	0	0.0331434
11329	340.368	2	0	1	0	0	0	0.0330565
11331	340.401	2	0	1	0	0	0	0.0334057
11333	340.434	2	0	1	0	0	0	0.0336329
11335	340.468	2	0	1	0	0	0	0.0336267
11337	340.501	2	0	1	0	0	0	0.0331843
11339	340.534	2	0	1	0	0	0	0.0327941
11341	340.568	2	0	1	0	0	0	0.0330247
11343	340.601	2	0	1	0	0	0	0.0332763
11345	340.634	2	0	1	0	0	0	0.0334097
11347	340.668	2	0	1	0	0	0	0.0335756
11349	340.701	2	0	1	0	0	0	0.0335119
11351	340.734	2	0	1	0	0	0	0.0332655
11353	340.768	2	0	1	0	0	0	0.0332416
11355	340.801	2	0	1	0	0	0	0.0332643
11357	340.834	2	0	1	0	0	0	0.033245
11359	340.868	2	0	1	0	0	0	0.033738
11361	340.901	2	0	1	0	0	0	0.0333978
11363	340.934	2	0	1	0	0	0	0.0330224
11365	340.968	2	0	1	0	0	0	0.0334472
11367	341.001	2	0	1	0	0	0	0.0337153
11369	341.034	2	0	1	0	0	0	0.0333552
11371	341.068	2	0	1	0	0	0	0.0331121
11373	341.101	2	0	1	0	0	0	0.032802
11375	341.134	2	0	1	0	0	0	0.0332649
11377	341.168	2	0	1	0	0	0	0.033997
11379	341.201	2	0	1	0	0	0	0.0343707
11381	341.234	2	0	1	0	0	0	0.0342389
11383	341.268	2	0	1	0	0	0	0.0339527
11385	341.301	2	0	1	0	0	0	0.0335426
11387	341.334	2	0	1	0	0	0	0.033337
11389	341.368	2	0	1	0	0	0	0.033809
11391	341.401	2	0	1	0	0	0	0.0341611
11393	341.434	2	0	1	0	0	0	0.0339953
11395	341.468	2	0	1	0	0	0	0.0336182
11397	341.501	2	0	1	0	0	0	0.0336545
11399	341.534	2	0	1	0	0	0	0.0334319
11401	341.568	2	0	1	0	0	0	0.0334722
11403	341.601	2	0	1	0	0	0	0.0340356
11405	341.634	2	0	1	0	0	0	0.0344042
11407	341.668	2	0	1	0	0	0	0.033901
11409	341.701	2	0	1	0	0	0	0.0336471
11411	341.734	2	0	1	0	0	0	0.0339617
11413	341.768	2	0	1	0	0	0	0.0344025
11415	341.801	2	0	1	0	0	0	0.0344133
11417	341.834	2	0	1	0	0	0	0.0347086
11419	341.868	2	0	1	0	0	0	0.0347023
11421	341.901	2	0	1	0	0	0	0.0346796
11423	341.934	2	0	1	0	0	0	0.0347239
11425	341.968	2	0	1	0	0	0	0.0347711
11427	342.001	2	0	1	0	0	0	0.0350669
[truncated: 25,154 more rows]

## Sheet: Mouse_2_415_Signal
FrameCounter	Timestamp	LedState	Stimulation	Output0	Output1	Input0	Input1	Region0G
7436	221.504	1	0	1	0	0	0	0.0128614
7438	221.537	1	0	1	0	0	0	0.0128614
7440	221.571	1	0	1	0	0	0	0.012825
7442	221.604	1	0	1	0	0	0	0.0128404
7444	221.637	1	0	1	0	0	0	0.0128381
7446	221.671	1	0	1	0	0	0	0.0128375
7448	221.704	1	0	1	0	0	0	0.0128779
7450	221.737	1	0	1	0	0	0	0.0127523
7452	221.771	1	0	1	0	0	0	0.0128852
7454	221.804	1	0	1	0	0	0	0.0128233
7456	221.837	1	0	1	0	0	0	0.0128421
7458	221.871	1	0	1	0	0	0	0.0128926
7460	221.904	1	0	1	0	0	0	0.0128602
7462	221.937	1	0	1	0	0	0	0.0128421
7464	221.971	1	0	1	0	0	0	0.0128943
7466	222.004	1	0	1	0	0	0	0.0128256
7468	222.037	1	0	1	0	0	0	0.0128665
7470	222.071	1	0	1	0	0	0	0.0128869
7472	222.104	1	0	1	0	0	0	0.0128358
7474	222.137	1	0	1	0	0	0	0.0128756
7476	222.171	1	0	1	0	0	0	0.0128926
7478	222.204	1	0	1	0	0	0	0.0128693
7480	222.237	1	0	1	0	0	0	0.012858
7482	222.271	1	0	1	0	0	0	0.0128619
7484	222.304	1	0	1	0	0	0	0.0128597
7486	222.337	1	0	1	0	0	0	0.0128983
7488	222.371	1	0	1	0	0	0	0.0128449
7490	222.404	1	0	1	0	0	0	0.0128029
7492	222.437	1	0	1	0	0	0	0.0128284
7494	222.471	1	0	1	0	0	0	0.0127995
7496	222.504	1	0	1	0	0	0	0.0128057
7498	222.537	1	0	1	0	0	0	0.0127518
7500	222.571	1	0	1	0	0	0	0.0128171
7502	222.604	1	0	1	0	0	0	0.0128148
7504	222.637	1	0	1	0	0	0	0.0128137
7506	222.671	1	0	1	0	0	0	0.0128228
7508	222.704	1	0	1	0	0	0	0.0128591
7510	222.737	1	0	1	0	0	0	0.0128125
7512	222.771	1	0	1	0	0	0	0.0128103
7514	222.804	1	0	1	0	0	0	0.0128631
7516	222.837	1	0	1	0	0	0	0.0128449
7518	222.871	1	0	1	0	0	0	0.0128171
7520	222.904	1	0	1	0	0	0	0.012871
7522	222.937	1	0	1	0	0	0	0.0128716
7524	222.971	1	0	1	0	0	0	0.0129159
7526	223.004	1	0	1	0	0	0	0.0128478
7528	223.037	1	0	1	0	0	0	0.0129182
7530	223.071	1	0	1	0	0	0	0.0128364
7532	223.104	1	0	1	0	0	0	0.0128557
7534	223.137	1	0	1	0	0	0	0.0128546
7536	223.171	1	0	1	0	0	0	0.0127455
7538	223.204	1	0	1	0	0	0	0.012829
7540	223.237	1	0	1	0	0	0	0.0127983
7542	223.271	1	0	1	0	0	0	0.0127972
7544	223.304	1	0	1	0	0	0	0.0128029
7546	223.337	1	0	1	0	0	0	0.0127773
7548	223.371	1	0	1	0	0	0	0.0128097
7550	223.404	1	0	1	0	0	0	0.012791
7552	223.437	1	0	1	0	0	0	0.0127739
7554	223.471	1	0	1	0	0	0	0.0128426
7556	223.504	1	0	1	0	0	0	0.0127773
7558	223.537	1	0	1	0	0	0	0.0127557
7560	223.57	1	0	1	0	0	0	0.0127552
7562	223.604	1	0	1	0	0	0	0.0128063
7564	223.637	1	0	1	0	0	0	0.0127069
7566	223.671	1	0	1	0	0	0	0.0127484
7568	223.704	1	0	1	0	0	0	0.0126586
7570	223.737	1	0	1	0	0	0	0.0126967
7572	223.77	1	0	1	0	0	0	0.0126745
7574	223.804	1	0	1	0	0	0	0.0127751
7576	223.837	1	0	1	0	0	0	0.0126495
7578	223.87	1	0	1	0	0	0	0.0125825
7580	223.904	1	0	1	0	0	0	0.0126467
7582	223.937	1	0	1	0	0	0	0.0126535
7584	223.97	1	0	1	0	0	0	0.0126831
7586	224.004	1	0	1	0	0	0	0.0127898
7588	224.037	1	0	1	0	0	0	0.0127308
7590	224.07	1	0	1	0	0	0	0.0127881
7592	224.104	1	0	1	0	0	0	0.0127756
7594	224.137	1	0	1	0	0	0	0.0128222
7596	224.17	1	0	1	0	0	0	0.0127648
7598	224.204	1	0	1	0	0	0	0.0127058
7600	224.237	1	0	1	0	0	0	0.0127501
7602	224.27	1	0	1	0	0	0	0.0126876
7604	224.304	1	0	1	0	0	0	0.0127285
7606	224.337	1	0	1	0	0	0	0.0126921
7608	224.37	1	0	1	0	0	0	0.01262
7610	224.404	1	0	1	0	0	0	0.0127364
7612	224.437	1	0	1	0	0	0	0.0127518
7614	224.47	1	0	1	0	0	0	0.0126774
7616	224.504	1	0	1	0	0	0	0.0126859
7618	224.537	1	0	1	0	0	0	0.0126751
7620	224.57	1	0	1	0	0	0	0.0126251
7622	224.604	1	0	1	0	0	0	0.0126501
7624	224.637	1	0	1	0	0	0	0.0126825
7626	224.67	1	0	1	0	0	0	0.0126592
7628	224.704	1	0	1	0	0	0	0.0126405
7630	224.737	1	0	1	0	0	0	0.012712
7632	224.77	1	0	1	0	0	0	0.0126581
7634	224.804	1	0	1	0	0	0	0.0126819
7636	224.837	1	0	1	0	0	0	0.01267
7638	224.87	1	0	1	0	0	0	0.012532
7640	224.904	1	0	1	0	0	0	0.0126887
7642	224.937	1	0	1	0	0	0	0.0126757
7644	224.97	1	0	1	0	0	0	0.0125485
7646	225.004	1	0	1	0	0	0	0.0126507
7648	225.037	1	0	1	0	0	0	0.0126149
7650	225.07	1	0	1	0	0	0	0.012603
7652	225.104	1	0	1	0	0	0	0.0125712
7654	225.137	1	0	1	0	0	0	0.0125422
7656	225.17	1	0	1	0	0	0	0.012591
7658	225.204	1	0	1	0	0	0	0.0125184
7660	225.237	1	0	1	0	0	0	0.0124411
7662	225.27	1	0	1	0	0	0	0.01249
7664	225.304	1	0	1	0	0	0	0.0124303
7666	225.337	1	0	1	0	0	0	0.0124922
7668	225.37	1	0	1	0	0	0	0.0124922
7670	225.404	1	0	1	0	0	0	0.0125343
7672	225.437	1	0	1	0	0	0	0.0124422
7674	225.47	1	0	1	0	0	0	0.0124627
7676	225.504	1	0	1	0	0	0	0.01249
7678	225.537	1	0	1	0	0	0	0.0125087
7680	225.57	1	0	1	0	0	0	0.0124428
7682	225.604	1	0	1	0	0	0	0.0124144
7684	225.637	1	0	1	0	0	0	0.0124014
7686	225.67	1	0	1	0	0	0	0.0124008
7688	225.704	1	0	1	0	0	0	0.0124428
7690	225.737	1	0	1	0	0	0	0.012348
7692	225.77	1	0	1	0	0	0	0.0124167
7694	225.804	1	0	1	0	0	0	0.0124559
7696	225.837	1	0	1	0	0	0	0.0125195
7698	225.87	1	0	1	0	0	0	0.0124627
7700	225.904	1	0	1	0	0	0	0.0124695
7702	225.937	1	0	1	0	0	0	0.0124547
7704	225.97	1	0	1	0	0	0	0.0124888
7706	226.004	1	0	1	0	0	0	0.0124661
7708	226.037	1	0	1	0	0	0	0.0124837
7710	226.07	1	0	1	0	0	0	0.0124962
7712	226.104	1	0	1	0	0	0	0.0125377
7714	226.137	1	0	1	0	0	0	0.0125047
7716	226.17	1	0	1	0	0	0	0.0124661
7718	226.204	1	0	1	0	0	0	0.0125036
7720	226.237	1	0	1	0	0	0	0.012457
7722	226.27	1	0	1	0	0	0	0.0124769
7724	226.304	1	0	1	0	0	0	0.012545
7726	226.337	1	0	1	0	0	0	0.0125184
7728	226.37	1	0	1	0	0	0	0.0125132
7730	226.404	1	0	1	0	0	0	0.0125445
7732	226.437	1	0	1	0	0	0	0.0125485
7734	226.47	1	0	1	0	0	0	0.0125547
7736	226.504	1	0	1	0	0	0	0.0125161
7738	226.537	1	0	1	0	0	0	0.0125814
7740	226.57	1	0	1	0	0	0	0.012557
7742	226.604	1	0	1	0	0	0	0.0125252
7744	226.637	1	0	1	0	0	0	0.0125161
7746	226.67	1	0	1	0	0	0	0.0125087
7748	226.704	1	0	1	0	0	0	0.0125962
7750	226.737	1	0	1	0	0	0	0.0125257
7752	226.77	1	0	1	0	0	0	0.0125621
7754	226.804	1	0	1	0	0	0	0.0125882
7756	226.837	1	0	1	0	0	0	0.0125303
7758	226.87	1	0	1	0	0	0	0.0126098
7760	226.904	1	0	1	0	0	0	0.0125547
7762	226.937	1	0	1	0	0	0	0.0125666
7764	226.97	1	0	1	0	0	0	0.0125933
7766	227.004	1	0	1	0	0	0	0.012482
7768	227.037	1	0	1	0	0	0	0.0126268
7770	227.07	1	0	1	0	0	0	0.0125308
7772	227.104	1	0	1	0	0	0	0.0125445
7774	227.137	1	0	1	0	0	0	0.0126069
7776	227.17	1	0	1	0	0	0	0.0125218
7778	227.204	1	0	1	0	0	0	0.0125473
7780	227.237	1	0	1	0	0	0	0.0125121
7782	227.27	1	0	1	0	0	0	0.0125218
7784	227.304	1	0	1	0	0	0	0.0125445
7786	227.337	1	0	1	0	0	0	0.0125882
7788	227.37	1	0	1	0	0	0	0.0125337
7790	227.404	1	0	1	0	0	0	0.0125734
7792	227.437	1	0	1	0	0	0	0.0126314
7794	227.47	1	0	1	0	0	0	0.0126092
7796	227.504	1	0	1	0	0	0	0.0125774
7798	227.537	1	0	1	0	0	0	0.0125621
7800	227.57	1	0	1	0	0	0	0.0125859
7802	227.604	1	0	1	0	0	0	0.0126229
7804	227.637	1	0	1	0	0	0	0.0125928
7806	227.67	1	0	1	0	0	0	0.0126393
7808	227.704	1	0	1	0	0	0	0.0126706
7810	227.737	1	0	1	0	0	0	0.0125661
7812	227.77	1	0	1	0	0	0	0.0126717
7814	227.804	1	0	1	0	0	0	0.01262
7816	227.837	1	0	1	0	0	0	0.0126229
7818	227.87	1	0	1	0	0	0	0.012503
7820	227.904	1	0	1	0	0	0	0.0125831
7822	227.937	1	0	1	0	0	0	0.0125803
7824	227.97	1	0	1	0	0	0	0.0125592
7826	228.004	1	0	1	0	0	0	0.0125581
7828	228.037	1	0	1	0	0	0	0.0125337
7830	228.07	1	0	1	0	0	0	0.0125541
7832	228.104	1	0	1	0	0	0	0.0125854
7834	228.137	1	0	1	0	0	0	0.0125848
7836	228.17	1	0	1	0	0	0	0.0126172
7838	228.204	1	0	1	0	0	0	0.0125774
7840	228.237	1	0	1	0	0	0	0.0125859
7842	228.27	1	0	1	0	0	0	0.0125536
7844	228.304	1	0	1	0	0	0	0.012595
7846	228.337	1	0	1	0	0	0	0.0125979
7848	228.37	1	0	1	0	0	0	0.0126052
7850	228.404	1	0	1	0	0	0	0.012557
7852	228.437	1	0	1	0	0	0	0.0125581
7854	228.47	1	0	1	0	0	0	0.01249
7856	228.504	1	0	1	0	0	0	0.012595
7858	228.537	1	0	1	0	0	0	0.0125945
7860	228.57	1	0	1	0	0	0	0.012628
7862	228.604	1	0	1	0	0	0	0.0125984
7864	228.637	1	0	1	0	0	0	0.0125916
7866	228.67	1	0	1	0	0	0	0.0125274
7868	228.704	1	0	1	0	0	0	0.0126109
7870	228.737	1	0	1	0	0	0	0.0126251
7872	228.77	1	0	1	0	0	0	0.0126223
7874	228.804	1	0	1	0	0	0	0.0125939
7876	228.837	1	0	1	0	0	0	0.0126092
7878	228.87	1	0	1	0	0	0	0.012582
7880	228.904	1	0	1	0	0	0	0.0126376
7882	228.937	1	0	1	0	0	0	0.0126155
7884	228.97	1	0	1	0	0	0	0.0126143
7886	229.004	1	0	1	0	0	0	0.012532
7888	229.037	1	0	1	0	0	0	0.0125655
7890	229.07	1	0	1	0	0	0	0.0125536
7892	229.104	1	0	1	0	0	0	0.0125865
7894	229.137	1	0	1	0	0	0	0.0126064
7896	229.17	1	0	1	0	0	0	0.0125609
7898	229.204	1	0	1	0	0	0	0.0124996
7900	229.237	1	0	1	0	0	0	0.0125047
7902	229.27	1	0	1	0	0	0	0.0125189
7904	229.304	1	0	1	0	0	0	0.012536
7906	229.337	1	0	1	0	0	0	0.012532
7908	229.37	1	0	1	0	0	0	0.0125496
7910	229.404	1	0	1	0	0	0	0.0125712
7912	229.437	1	0	1	0	0	0	0.012507
7914	229.47	1	0	1	0	0	0	0.0125808
7916	229.504	1	0	1	0	0	0	0.0125916
7918	229.537	1	0	1	0	0	0	0.0125888
7920	229.57	1	0	1	0	0	0	0.0126069
7922	229.604	1	0	1	0	0	0	0.0125587
7924	229.637	1	0	1	0	0	0	0.0126229
7926	229.67	1	0	1	0	0	0	0.0126001
7928	229.704	1	0	1	0	0	0	0.0126064
7930	229.737	1	0	1	0	0	0	0.0125558
7932	229.77	1	0	1	0	0	0	0.0124655
7934	229.804	1	0	1	0	0	0	0.0124934
7936	229.837	1	0	1	0	0	0	0.0125428
7938	229.87	1	0	1	0	0	0	0.0125797
7940	229.904	1	0	1	0	0	0	0.0125666
7942	229.937	1	0	1	0	0	0	0.0125945
7944	229.97	1	0	1	0	0	0	0.0125502
7946	230.004	1	0	1	0	0	0	0.0125314
7948	230.037	1	0	1	0	0	0	0.0125331
7950	230.07	1	0	1	0	0	0	0.0125638
7952	230.104	1	0	1	0	0	0	0.0125081
7954	230.137	1	0	1	0	0	0	0.0125343
7956	230.17	1	0	1	0	0	0	0.0125485
7958	230.204	1	0	1	0	0	0	0.0125388
7960	230.237	1	0	1	0	0	0	0.0124917
7962	230.27	1	0	1	0	0	0	0.0125416
7964	230.304	1	0	1	0	0	0	0.0125337
7966	230.337	1	0	1	0	0	0	0.0124672
7968	230.37	1	0	1	0	0	0	0.0124661
7970	230.404	1	0	1	0	0	0	0.0125121
7972	230.437	1	0	1	0	0	0	0.0125189
7974	230.47	1	0	1	0	0	0	0.0125036
7976	230.504	1	0	1	0	0	0	0.0124559
7978	230.537	1	0	1	0	0	0	0.0124655
7980	230.57	1	0	1	0	0	0	0.0124786
7982	230.604	1	0	1	0	0	0	0.0124809
7984	230.637	1	0	1	0	0	0	0.0124735
7986	230.67	1	0	1	0	0	0	0.0125149
7988	230.704	1	0	1	0	0	0	0.0124576
7990	230.737	1	0	1	0	0	0	0.0124775
7992	230.77	1	0	1	0	0	0	0.0124593
7994	230.804	1	0	1	0	0	0	0.0124655
7996	230.837	1	0	1	0	0	0	0.0124366
7998	230.87	1	0	1	0	0	0	0.0124156
8000	230.904	1	0	1	0	0	0	0.0124156
8002	230.937	1	0	1	0	0	0	0.0124616
8004	230.97	1	0	1	0	0	0	0.0123923
8006	231.004	1	0	1	0	0	0	0.0124752
8008	231.037	1	0	1	0	0	0	0.01244
8010	231.07	1	0	1	0	0	0	0.0124735
8012	231.104	1	0	1	0	0	0	0.0124803
8014	231.137	1	0	1	0	0	0	0.0125337
8016	231.17	1	0	1	0	0	0	0.0125206
8018	231.204	1	0	1	0	0	0	0.0125428
8020	231.237	1	0	1	0	0	0	0.0125371
8022	231.27	1	0	1	0	0	0	0.0125007
8024	231.304	1	0	1	0	0	0	0.012432
8026	231.337	1	0	1	0	0	0	0.012407
8028	231.37	1	0	1	0	0	0	0.0124763
8030	231.404	1	0	1	0	0	0	0.0124877
8032	231.437	1	0	1	0	0	0	0.0124349
8034	231.47	1	0	1	0	0	0	0.0124457
8036	231.504	1	0	1	0	0	0	0.0125121
8038	231.537	1	0	1	0	0	0	0.0124474
8040	231.57	1	0	1	0	0	0	0.0124865
8042	231.604	1	0	1	0	0	0	0.0124655
8044	231.637	1	0	1	0	0	0	0.0124689
8046	231.67	1	0	1	0	0	0	0.0124326
8048	231.704	1	0	1	0	0	0	0.0125059
8050	231.737	1	0	1	0	0	0	0.0124593
8052	231.77	1	0	1	0	0	0	0.0124167
8054	231.804	1	0	1	0	0	0	0.0124678
8056	231.837	1	0	1	0	0	0	0.0124224
8058	231.87	1	0	1	0	0	0	0.0124877
8060	231.904	1	0	1	0	0	0	0.0124195
8062	231.937	1	0	1	0	0	0	0.0124173
8064	231.97	1	0	1	0	0	0	0.0124434
8066	232.004	1	0	1	0	0	0	0.012394
8068	232.037	1	0	1	0	0	0	0.0124496
8070	232.07	1	0	1	0	0	0	0.0123957
8072	232.104	1	0	1	0	0	0	0.0123997
8074	232.137	1	0	1	0	0	0	0.0123843
8076	232.17	1	0	1	0	0	0	0.0124269
8078	232.203	1	0	1	0	0	0	0.0124644
8080	232.237	1	0	1	0	0	0	0.0124309
8082	232.27	1	0	1	0	0	0	0.012511
8084	232.303	1	0	1	0	0	0	0.0124962
8086	232.337	1	0	1	0	0	0	0.0124008
8088	232.37	1	0	1	0	0	0	0.0123979
8090	232.403	1	0	1	0	0	0	0.0124065
8092	232.437	1	0	1	0	0	0	0.0124661
8094	232.47	1	0	1	0	0	0	0.0124706
8096	232.503	1	0	1	0	0	0	0.012419
8098	232.537	1	0	1	0	0	0	0.0124587
8100	232.57	1	0	1	0	0	0	0.0124286
8102	232.603	1	0	1	0	0	0	0.0124462
8104	232.637	1	0	1	0	0	0	0.0125019
8106	232.67	1	0	1	0	0	0	0.0124741
8108	232.703	1	0	1	0	0	0	0.0124383
8110	232.737	1	0	1	0	0	0	0.0124445
8112	232.77	1	0	1	0	0	0	0.0124434
8114	232.803	1	0	1	0	0	0	0.0124797
8116	232.837	1	0	1	0	0	0	0.0124218
8118	232.87	1	0	1	0	0	0	0.0124752
8120	232.903	1	0	1	0	0	0	0.0124741
8122	232.937	1	0	1	0	0	0	0.0124116
8124	232.97	1	0	1	0	0	0	0.0124099
8126	233.003	1	0	1	0	0	0	0.0124167
8128	233.037	1	0	1	0	0	0	0.012415
8130	233.07	1	0	1	0	0	0	0.0123928
8132	233.103	1	0	1	0	0	0	0.0124082
8134	233.137	1	0	1	0	0	0	0.0123991
8136	233.17	1	0	1	0	0	0	0.0123769
8138	233.203	1	0	1	0	0	0	0.0124207
8140	233.237	1	0	1	0	0	0	0.0124218
8142	233.27	1	0	1	0	0	0	0.01239
8144	233.303	1	0	1	0	0	0	0.0123684
8146	233.337	1	0	1	0	0	0	0.0123724
8148	233.37	1	0	1	0	0	0	0.0123923
8150	233.403	1	0	1	0	0	0	0.0123798
8152	233.437	1	0	1	0	0	0	0.0124377
8154	233.47	1	0	1	0	0	0	0.0124405
8156	233.503	1	0	1	0	0	0	0.0124241
8158	233.537	1	0	1	0	0	0	0.0124087
8160	233.57	1	0	1	0	0	0	0.0124252
8162	233.603	1	0	1	0	0	0	0.012453
8164	233.637	1	0	1	0	0	0	0.0124281
8166	233.67	1	0	1	0	0	0	0.0123917
8168	233.703	1	0	1	0	0	0	0.0123855
8170	233.737	1	0	1	0	0	0	0.012444
8172	233.77	1	0	1	0	0	0	0.0124474
8174	233.803	1	0	1	0	0	0	0.012457
8176	233.837	1	0	1	0	0	0	0.012499
8178	233.87	1	0	1	0	0	0	0.0124576
8180	233.903	1	0	1	0	0	0	0.0124848
8182	233.937	1	0	1	0	0	0	0.012419
8184	233.97	1	0	1	0	0	0	0.012436
8186	234.003	1	0	1	0	0	0	0.0124258
8188	234.037	1	0	1	0	0	0	0.0124723
8190	234.07	1	0	1	0	0	0	0.0124564
8192	234.103	1	0	1	0	0	0	0.0124337
8194	234.137	1	0	1	0	0	0	0.0124275
8196	234.17	1	0	1	0	0	0	0.0124343
8198	234.203	1	0	1	0	0	0	0.0123627
8200	234.237	1	0	1	0	0	0	0.0123667
8202	234.27	1	0	1	0	0	0	0.0124025
8204	234.303	1	0	1	0	0	0	0.0123809
8206	234.337	1	0	1	0	0	0	0.0124042
8208	234.37	1	0	1	0	0	0	0.0123673
8210	234.403	1	0	1	0	0	0	0.012432
8212	234.437	1	0	1	0	0	0	0.012407
8214	234.47	1	0	1	0	0	0	0.0124014
8216	234.503	1	0	1	0	0	0	0.0124616
8218	234.537	1	0	1	0	0	0	0.0124224
8220	234.57	1	0	1	0	0	0	0.0124627
8222	234.603	1	0	1	0	0	0	0.0124025
8224	234.637	1	0	1	0	0	0	0.01244
8226	234.67	1	0	1	0	0	0	0.0124144
8228	234.703	1	0	1	0	0	0	0.0123843
8230	234.737	1	0	1	0	0	0	0.0123752
8232	234.77	1	0	1	0	0	0	0.0124224
8234	234.803	1	0	1	0	0	0	0.0124934
8236	234.837	1	0	1	0	0	0	0.012419
8238	234.87	1	0	1	0	0	0	0.0124167
8240	234.903	1	0	1	0	0	0	0.0123644
8242	234.937	1	0	1	0	0	0	0.0123656
8244	234.97	1	0	1	0	0	0	0.0124207
8246	235.003	1	0	1	0	0	0	0.012419
8248	235.037	1	0	1	0	0	0	0.0124002
8250	235.07	1	0	1	0	0	0	0.0124269
8252	235.103	1	0	1	0	0	0	0.012373
8254	235.137	1	0	1	0	0	0	0.0123872
8256	235.17	1	0	1	0	0	0	0.0124036
8258	235.203	1	0	1	0	0	0	0.0123945
8260	235.237	1	0	1	0	0	0	0.0124048
8262	235.27	1	0	1	0	0	0	0.0123928
8264	235.303	1	0	1	0	0	0	0.0123446
8266	235.337	1	0	1	0	0	0	0.0123764
8268	235.37	1	0	1	0	0	0	0.0123764
8270	235.403	1	0	1	0	0	0	0.0124121
8272	235.437	1	0	1	0	0	0	0.0123826
8274	235.47	1	0	1	0	0	0	0.0124684
8276	235.503	1	0	1	0	0	0	0.0123673
8278	235.537	1	0	1	0	0	0	0.0124144
8280	235.57	1	0	1	0	0	0	0.0124298
8282	235.603	1	0	1	0	0	0	0.0123741
8284	235.637	1	0	1	0	0	0	0.0123997
8286	235.67	1	0	1	0	0	0	0.0123809
8288	235.703	1	0	1	0	0	0	0.0124491
8290	235.737	1	0	1	0	0	0	0.0124712
8292	235.77	1	0	1	0	0	0	0.0124121
8294	235.803	1	0	1	0	0	0	0.012415
8296	235.837	1	0	1	0	0	0	0.0123571
8298	235.87	1	0	1	0	0	0	0.0124059
8300	235.903	1	0	1	0	0	0	0.0124326
8302	235.937	1	0	1	0	0	0	0.0124582
8304	235.97	1	0	1	0	0	0	0.0124144
8306	236.003	1	0	1	0	0	0	0.0124042
8308	236.037	1	0	1	0	0	0	0.0124263
8310	236.07	1	0	1	0	0	0	0.0124093
8312	236.103	1	0	1	0	0	0	0.0124116
8314	236.137	1	0	1	0	0	0	0.0124735
8316	236.17	1	0	1	0	0	0	0.0124684
8318	236.203	1	0	1	0	0	0	0.0124383
8320	236.237	1	0	1	0	0	0	0.0123985
8322	236.27	1	0	1	0	0	0	0.0123849
8324	236.303	1	0	1	0	0	0	0.0123962
8326	236.337	1	0	1	0	0	0	0.012386
8328	236.37	1	0	1	0	0	0	0.0124201
8330	236.403	1	0	1	0	0	0	0.0123616
8332	236.437	1	0	1	0	0	0	0.0123502
8334	236.47	1	0	1	0	0	0	0.0123491
8336	236.503	1	0	1	0	0	0	0.0123287
8338	236.537	1	0	1	0	0	0	0.0122827
8340	236.57	1	0	1	0	0	0	0.0123139
8342	236.603	1	0	1	0	0	0	0.0123133
8344	236.637	1	0	1	0	0	0	0.0123656
8346	236.67	1	0	1	0	0	0	0.0122963
8348	236.703	1	0	1	0	0	0	0.0123366
8350	236.737	1	0	1	0	0	0	0.0123593
8352	236.77	1	0	1	0	0	0	0.0123395
8354	236.803	1	0	1	0	0	0	0.0124133
8356	236.837	1	0	1	0	0	0	0.0123769
8358	236.87	1	0	1	0	0	0	0.0123928
8360	236.903	1	0	1	0	0	0	0.0124173
8362	236.937	1	0	1	0	0	0	0.0124508
8364	236.97	1	0	1	0	0	0	0.0123775
8366	237.003	1	0	1	0	0	0	0.0123571
8368	237.037	1	0	1	0	0	0	0.0124468
8370	237.07	1	0	1	0	0	0	0.0123741
8372	237.103	1	0	1	0	0	0	0.0124207
8374	237.137	1	0	1	0	0	0	0.0123588
8376	237.17	1	0	1	0	0	0	0.0123258
8378	237.203	1	0	1	0	0	0	0.0124082
8380	237.237	1	0	1	0	0	0	0.0123957
8382	237.27	1	0	1	0	0	0	0.0124428
8384	237.303	1	0	1	0	0	0	0.0124042
8386	237.337	1	0	1	0	0	0	0.0124343
8388	237.37	1	0	1	0	0	0	0.0123866
8390	237.403	1	0	1	0	0	0	0.0123571
8392	237.437	1	0	1	0	0	0	0.0123315
8394	237.47	1	0	1	0	0	0	0.0123775
8396	237.503	1	0	1	0	0	0	0.0123928
8398	237.537	1	0	1	0	0	0	0.0123974
8400	237.57	1	0	1	0	0	0	0.0123593
8402	237.603	1	0	1	0	0	0	0.0123065
8404	237.637	1	0	1	0	0	0	0.0122753
8406	237.67	1	0	1	0	0	0	0.0123122
8408	237.703	1	0	1	0	0	0	0.0123644
8410	237.737	1	0	1	0	0	0	0.0123667
8412	237.77	1	0	1	0	0	0	0.0123514
8414	237.803	1	0	1	0	0	0	0.0122844
8416	237.837	1	0	1	0	0	0	0.012323
8418	237.87	1	0	1	0	0	0	0.0122531
8420	237.903	1	0	1	0	0	0	0.0123099
8422	237.937	1	0	1	0	0	0	0.0123724
8424	237.97	1	0	1	0	0	0	0.0123264
8426	238.003	1	0	1	0	0	0	0.012365
8428	238.037	1	0	1	0	0	0	0.0123287
8430	238.07	1	0	1	0	0	0	0.01234
8432	238.103	1	0	1	0	0	0	0.0122861
8434	238.137	1	0	1	0	0	0	0.0122917
8436	238.17	1	0	1	0	0	0	0.0123065
8438	238.203	1	0	1	0	0	0	0.0123429
8440	238.237	1	0	1	0	0	0	0.0123616
8442	238.27	1	0	1	0	0	0	0.0123173
8444	238.303	1	0	1	0	0	0	0.0122179
8446	238.337	1	0	1	0	0	0	0.0123593
8448	238.37	1	0	1	0	0	0	0.0123031
8450	238.403	1	0	1	0	0	0	0.0122838
8452	238.437	1	0	1	0	0	0	0.0123519
8454	238.47	1	0	1	0	0	0	0.0122565
8456	238.503	1	0	1	0	0	0	0.0123179
8458	238.537	1	0	1	0	0	0	0.0123042
8460	238.57	1	0	1	0	0	0	0.0123128
8462	238.603	1	0	1	0	0	0	0.0123667
8464	238.637	1	0	1	0	0	0	0.0123031
8466	238.67	1	0	1	0	0	0	0.01229
8468	238.703	1	0	1	0	0	0	0.0122844
8470	238.737	1	0	1	0	0	0	0.0122656
8472	238.77	1	0	1	0	0	0	0.0122287
8474	238.803	1	0	1	0	0	0	0.0122651
8476	238.837	1	0	1	0	0	0	0.0122775
8478	238.87	1	0	1	0	0	0	0.0123315
8480	238.903	1	0	1	0	0	0	0.012281
8482	238.937	1	0	1	0	0	0	0.0122946
8484	238.97	1	0	1	0	0	0	0.0122793
8486	239.003	1	0	1	0	0	0	0.0122673
8488	239.037	1	0	1	0	0	0	0.0123025
8490	239.07	1	0	1	0	0	0	0.0123037
8492	239.103	1	0	1	0	0	0	0.0122599
8494	239.137	1	0	1	0	0	0	0.0122639
8496	239.17	1	0	1	0	0	0	0.0123031
8498	239.203	1	0	1	0	0	0	0.0122548
8500	239.237	1	0	1	0	0	0	0.0122832
8502	239.27	1	0	1	0	0	0	0.0122804
8504	239.303	1	0	1	0	0	0	0.0122571
8506	239.337	1	0	1	0	0	0	0.0123434
8508	239.37	1	0	1	0	0	0	0.0122929
8510	239.403	1	0	1	0	0	0	0.0123287
8512	239.437	1	0	1	0	0	0	0.0122696
8514	239.47	1	0	1	0	0	0	0.012223
8516	239.503	1	0	1	0	0	0	0.0122611
8518	239.537	1	0	1	0	0	0	0.012223
8520	239.57	1	0	1	0	0	0	0.0122037
8522	239.603	1	0	1	0	0	0	0.0122582
8524	239.637	1	0	1	0	0	0	0.012244
8526	239.67	1	0	1	0	0	0	0.0122594
8528	239.703	1	0	1	0	0	0	0.0122855
8530	239.737	1	0	1	0	0	0	0.0123008
8532	239.77	1	0	1	0	0	0	0.0123287
8534	239.803	1	0	1	0	0	0	0.0123179
8536	239.837	1	0	1	0	0	0	0.0123338
8538	239.87	1	0	1	0	0	0	0.0122957
8540	239.903	1	0	1	0	0	0	0.0123071
8542	239.937	1	0	1	0	0	0	0.0122844
8544	239.97	1	0	1	0	0	0	0.0122406
8546	240.003	1	0	1	0	0	0	0.012269
8548	240.037	1	0	1	0	0	0	0.012327
8550	240.07	1	0	1	0	0	0	0.0123463
8552	240.103	1	0	1	0	0	0	0.0122605
8554	240.137	1	0	1	0	0	0	0.0122651
8556	240.17	1	0	1	0	0	0	0.0123099
8558	240.203	1	0	1	0	0	0	0.0122645
8560	240.237	1	0	1	0	0	0	0.0122963
8562	240.27	1	0	1	0	0	0	0.0122526
8564	240.303	1	0	1	0	0	0	0.0123037
8566	240.337	1	0	1	0	0	0	0.0123071
8568	240.37	1	0	1	0	0	0	0.0123082
8570	240.403	1	0	1	0	0	0	0.0123076
8572	240.437	1	0	1	0	0	0	0.0122543
8574	240.47	1	0	1	0	0	0	0.01229
8576	240.503	1	0	1	0	0	0	0.0123253
8578	240.537	1	0	1	0	0	0	0.012319
8580	240.57	1	0	1	0	0	0	0.0123025
8582	240.603	1	0	1	0	0	0	0.0123485
8584	240.637	1	0	1	0	0	0	0.0123088
8586	240.67	1	0	1	0	0	0	0.0122622
8588	240.703	1	0	1	0	0	0	0.0122497
8590	240.736	1	0	1	0	0	0	0.0122713
8592	240.77	1	0	1	0	0	0	0.0122094
8594	240.803	1	0	1	0	0	0	0.0122696
8596	240.836	1	0	1	0	0	0	0.0122577
8598	240.87	1	0	1	0	0	0	0.0122355
8600	240.903	1	0	1	0	0	0	0.0122719
8602	240.936	1	0	1	0	0	0	0.0123179
8604	240.97	1	0	1	0	0	0	0.0123105
8606	241.003	1	0	1	0	0	0	0.0123025
8608	241.036	1	0	1	0	0	0	0.0122645
8610	241.07	1	0	1	0	0	0	0.012223
8612	241.103	1	0	1	0	0	0	0.0122781
8614	241.136	1	0	1	0	0	0	0.0123031
8616	241.17	1	0	1	0	0	0	0.0122702
8618	241.203	1	0	1	0	0	0	0.0122946
8620	241.236	1	0	1	0	0	0	0.0122923
8622	241.27	1	0	1	0	0	0	0.01229
8624	241.303	1	0	1	0	0	0	0.0122946
8626	241.336	1	0	1	0	0	0	0.012302
8628	241.37	1	0	1	0	0	0	0.0122696
8630	241.403	1	0	1	0	0	0	0.0122633
8632	241.436	1	0	1	0	0	0	0.0123059
8634	241.47	1	0	1	0	0	0	0.012298
8636	241.503	1	0	1	0	0	0	0.0123094
8638	241.536	1	0	1	0	0	0	0.0123207
8640	241.57	1	0	1	0	0	0	0.0122883
8642	241.603	1	0	1	0	0	0	0.012281
8644	241.636	1	0	1	0	0	0	0.0123224
8646	241.67	1	0	1	0	0	0	0.0123502
8648	241.703	1	0	1	0	0	0	0.0123048
8650	241.736	1	0	1	0	0	0	0.012281
8652	241.77	1	0	1	0	0	0	0.0123406
8654	241.803	1	0	1	0	0	0	0.0123537
8656	241.836	1	0	1	0	0	0	0.0123139
8658	241.87	1	0	1	0	0	0	0.012315
8660	241.903	1	0	1	0	0	0	0.0122861
8662	241.936	1	0	1	0	0	0	0.0122554
8664	241.97	1	0	1	0	0	0	0.0121549
8666	242.003	1	0	1	0	0	0	0.0121901
8668	242.036	1	0	1	0	0	0	0.0123111
8670	242.07	1	0	1	0	0	0	0.0122969
8672	242.103	1	0	1	0	0	0	0.0122912
8674	242.136	1	0	1	0	0	0	0.0122367
8676	242.17	1	0	1	0	0	0	0.0122412
8678	242.203	1	0	1	0	0	0	0.0122628
8680	242.236	1	0	1	0	0	0	0.0123122
8682	242.27	1	0	1	0	0	0	0.0123275
8684	242.303	1	0	1	0	0	0	0.0123502
8686	242.336	1	0	1	0	0	0	0.012248
8688	242.37	1	0	1	0	0	0	0.0122952
8690	242.403	1	0	1	0	0	0	0.0122367
8692	242.436	1	0	1	0	0	0	0.0122418
8694	242.47	1	0	1	0	0	0	0.012244
8696	242.503	1	0	1	0	0	0	0.0122242
8698	242.536	1	0	1	0	0	0	0.0122429
8700	242.57	1	0	1	0	0	0	0.0122554
8702	242.603	1	0	1	0	0	0	0.0123048
8704	242.636	1	0	1	0	0	0	0.0123003
8706	242.67	1	0	1	0	0	0	0.0122486
8708	242.703	1	0	1	0	0	0	0.0122509
8710	242.736	1	0	1	0	0	0	0.0121708
8712	242.77	1	0	1	0	0	0	0.012269
8714	242.803	1	0	1	0	0	0	0.0122168
8716	242.836	1	0	1	0	0	0	0.0122191
8718	242.87	1	0	1	0	0	0	0.0122616
8720	242.903	1	0	1	0	0	0	0.0122633
8722	242.936	1	0	1	0	0	0	0.0122855
8724	242.97	1	0	1	0	0	0	0.012277
8726	243.003	1	0	1	0	0	0	0.0122935
8728	243.036	1	0	1	0	0	0	0.012277
8730	243.07	1	0	1	0	0	0	0.0123264
8732	243.103	1	0	1	0	0	0	0.0123236
8734	243.136	1	0	1	0	0	0	0.0122435
8736	243.17	1	0	1	0	0	0	0.012269
8738	243.203	1	0	1	0	0	0	0.0122418
8740	243.236	1	0	1	0	0	0	0.0122565
8742	243.27	1	0	1	0	0	0	0.0123025
8744	243.303	1	0	1	0	0	0	0.012248
8746	243.336	1	0	1	0	0	0	0.0122633
8748	243.37	1	0	1	0	0	0	0.0122446
8750	243.403	1	0	1	0	0	0	0.0122384
8752	243.436	1	0	1	0	0	0	0.0122389
8754	243.47	1	0	1	0	0	0	0.0122179
8756	243.503	1	0	1	0	0	0	0.0122196
8758	243.536	1	0	1	0	0	0	0.0122043
8760	243.57	1	0	1	0	0	0	0.0122372
8762	243.603	1	0	1	0	0	0	0.0122469
8764	243.636	1	0	1	0	0	0	0.0122298
8766	243.67	1	0	1	0	0	0	0.0122196
8768	243.703	1	0	1	0	0	0	0.0122037
8770	243.736	1	0	1	0	0	0	0.0121833
8772	243.77	1	0	1	0	0	0	0.0122775
8774	243.803	1	0	1	0	0	0	0.012189
8776	243.836	1	0	1	0	0	0	0.0121975
8778	243.87	1	0	1	0	0	0	0.0122043
8780	243.903	1	0	1	0	0	0	0.0122633
8782	243.936	1	0	1	0	0	0	0.0122526
8784	243.97	1	0	1	0	0	0	0.0122026
8786	244.003	1	0	1	0	0	0	0.0122526
8788	244.036	1	0	1	0	0	0	0.0122321
8790	244.07	1	0	1	0	0	0	0.0122395
8792	244.103	1	0	1	0	0	0	0.012302
8794	244.136	1	0	1	0	0	0	0.012227
8796	244.17	1	0	1	0	0	0	0.0121941
8798	244.203	1	0	1	0	0	0	0.0122315
8800	244.236	1	0	1	0	0	0	0.0123139
8802	244.27	1	0	1	0	0	0	0.0122474
8804	244.303	1	0	1	0	0	0	0.0122071
8806	244.336	1	0	1	0	0	0	0.0122912
8808	244.37	1	0	1	0	0	0	0.0122253
8810	244.403	1	0	1	0	0	0	0.0122486
8812	244.436	1	0	1	0	0	0	0.0122474
8814	244.47	1	0	1	0	0	0	0.012248
8816	244.503	1	0	1	0	0	0	0.0122225
8818	244.536	1	0	1	0	0	0	0.0122196
8820	244.57	1	0	1	0	0	0	0.0122526
8822	244.603	1	0	1	0	0	0	0.0122389
8824	244.636	1	0	1	0	0	0	0.0122418
8826	244.67	1	0	1	0	0	0	0.0123122
8828	244.703	1	0	1	0	0	0	0.0122702
8830	244.736	1	0	1	0	0	0	0.0122668
8832	244.77	1	0	1	0	0	0	0.0122605
8834	244.803	1	0	1	0	0	0	0.0123128
8836	244.836	1	0	1	0	0	0	0.0123417
8838	244.87	1	0	1	0	0	0	0.0122355
8840	244.903	1	0	1	0	0	0	0.0122225
8842	244.936	1	0	1	0	0	0	0.0121958
8844	244.97	1	0	1	0	0	0	0.0121884
8846	245.003	1	0	1	0	0	0	0.0122946
8848	245.036	1	0	1	0	0	0	0.0123224
8850	245.07	1	0	1	0	0	0	0.0122156
8852	245.103	1	0	1	0	0	0	0.0122037
8854	245.136	1	0	1	0	0	0	0.0122775
8856	245.17	1	0	1	0	0	0	0.0122713
8858	245.203	1	0	1	0	0	0	0.0122128
8860	245.236	1	0	1	0	0	0	0.0122253
8862	245.27	1	0	1	0	0	0	0.0122957
8864	245.303	1	0	1	0	0	0	0.0122509
8866	245.336	1	0	1	0	0	0	0.0122145
8868	245.37	1	0	1	0	0	0	0.0122423
8870	245.403	1	0	1	0	0	0	0.0122014
8872	245.436	1	0	1	0	0	0	0.0122122
8874	245.47	1	0	1	0	0	0	0.012164
8876	245.503	1	0	1	0	0	0	0.0121748
8878	245.536	1	0	1	0	0	0	0.0121713
8880	245.57	1	0	1	0	0	0	0.0122435
8882	245.603	1	0	1	0	0	0	0.0121958
8884	245.636	1	0	1	0	0	0	0.0121918
8886	245.67	1	0	1	0	0	0	0.0122156
8888	245.703	1	0	1	0	0	0	0.0121748
8890	245.736	1	0	1	0	0	0	0.0122083
8892	245.77	1	0	1	0	0	0	0.0121935
8894	245.803	1	0	1	0	0	0	0.0121867
8896	245.836	1	0	1	0	0	0	0.0122236
8898	245.87	1	0	1	0	0	0	0.0122423
8900	245.903	1	0	1	0	0	0	0.0122054
8902	245.936	1	0	1	0	0	0	0.0122457
8904	245.97	1	0	1	0	0	0	0.0122219
8906	246.003	1	0	1	0	0	0	0.0122429
8908	246.036	1	0	1	0	0	0	0.0122361
8910	246.07	1	0	1	0	0	0	0.0122191
8912	246.103	1	0	1	0	0	0	0.0122423
8914	246.136	1	0	1	0	0	0	0.0121816
8916	246.17	1	0	1	0	0	0	0.0122406
8918	246.203	1	0	1	0	0	0	0.0122344
8920	246.236	1	0	1	0	0	0	0.0122361
8922	246.27	1	0	1	0	0	0	0.0121992
8924	246.303	1	0	1	0	0	0	0.012189
8926	246.336	1	0	1	0	0	0	0.0123059
8928	246.37	1	0	1	0	0	0	0.0122571
8930	246.403	1	0	1	0	0	0	0.0122656
8932	246.436	1	0	1	0	0	0	0.0122912
8934	246.47	1	0	1	0	0	0	0.0122242
8936	246.503	1	0	1	0	0	0	0.0122452
8938	246.536	1	0	1	0	0	0	0.012277
8940	246.57	1	0	1	0	0	0	0.0122668
8942	246.603	1	0	1	0	0	0	0.0121662
8944	246.636	1	0	1	0	0	0	0.0121753
8946	246.67	1	0	1	0	0	0	0.0122531
8948	246.703	1	0	1	0	0	0	0.0122122
8950	246.736	1	0	1	0	0	0	0.0122156
8952	246.77	1	0	1	0	0	0	0.0122355
8954	246.803	1	0	1	0	0	0	0.012223
8956	246.836	1	0	1	0	0	0	0.0122747
8958	246.87	1	0	1	0	0	0	0.0122605
8960	246.903	1	0	1	0	0	0	0.0122094
8962	246.936	1	0	1	0	0	0	0.0121628
8964	246.97	1	0	1	0	0	0	0.0121844
8966	247.003	1	0	1	0	0	0	0.0122781
8968	247.036	1	0	1	0	0	0	0.0122418
8970	247.07	1	0	1	0	0	0	0.0122321
8972	247.103	1	0	1	0	0	0	0.0122446
8974	247.136	1	0	1	0	0	0	0.0122134
8976	247.17	1	0	1	0	0	0	0.0122861
8978	247.203	1	0	1	0	0	0	0.0122168
8980	247.236	1	0	1	0	0	0	0.0121975
8982	247.27	1	0	1	0	0	0	0.0122049
8984	247.303	1	0	1	0	0	0	0.0122344
8986	247.336	1	0	1	0	0	0	0.0122037
8988	247.37	1	0	1	0	0	0	0.0121901
8990	247.403	1	0	1	0	0	0	0.0122429
8992	247.436	1	0	1	0	0	0	0.012206
8994	247.47	1	0	1	0	0	0	0.0122526
8996	247.503	1	0	1	0	0	0	0.0122531
8998	247.536	1	0	1	0	0	0	0.0123218
9000	247.57	1	0	1	0	0	0	0.0122974
9002	247.603	1	0	1	0	0	0	0.0122225
9004	247.636	1	0	1	0	0	0	0.0122043
9006	247.67	1	0	1	0	0	0	0.0122094
9008	247.703	1	0	1	0	0	0	0.0122236
9010	247.736	1	0	1	0	0	0	0.0122179
9012	247.77	1	0	1	0	0	0	0.0122668
9014	247.803	1	0	1	0	0	0	0.0122787
9016	247.836	1	0	1	0	0	0	0.0121526
9018	247.87	1	0	1	0	0	0	0.0122225
9020	247.903	1	0	1	0	0	0	0.0122509
9022	247.936	1	0	1	0	0	0	0.012281
9024	247.97	1	0	1	0	0	0	0.0121339
9026	248.003	1	0	1	0	0	0	0.01216
9028	248.036	1	0	1	0	0	0	0.0122151
9030	248.07	1	0	1	0	0	0	0.0122384
9032	248.103	1	0	1	0	0	0	0.0122202
9034	248.136	1	0	1	0	0	0	0.0122514
9036	248.17	1	0	1	0	0	0	0.0122543
9038	248.203	1	0	1	0	0	0	0.0122117
9040	248.236	1	0	1	0	0	0	0.0122741
9042	248.27	1	0	1	0	0	0	0.0122054
9044	248.303	1	0	1	0	0	0	0.0122031
9046	248.336	1	0	1	0	0	0	0.0122361
9048	248.37	1	0	1	0	0	0	0.0122168
9050	248.403	1	0	1	0	0	0	0.0122662
9052	248.436	1	0	1	0	0	0	0.0122406
9054	248.47	1	0	1	0	0	0	0.0122293
9056	248.503	1	0	1	0	0	0	0.0122952
9058	248.536	1	0	1	0	0	0	0.012181
9060	248.57	1	0	1	0	0	0	0.0122537
9062	248.603	1	0	1	0	0	0	0.0121549
9064	248.636	1	0	1	0	0	0	0.0122066
9066	248.67	1	0	1	0	0	0	0.0121469
9068	248.703	1	0	1	0	0	0	0.0122145
9070	248.736	1	0	1	0	0	0	0.0122599
9072	248.77	1	0	1	0	0	0	0.0122151
9074	248.803	1	0	1	0	0	0	0.0122173
9076	248.836	1	0	1	0	0	0	0.0122128
9078	248.87	1	0	1	0	0	0	0.0121918
9080	248.903	1	0	1	0	0	0	0.0123213
9082	248.936	1	0	1	0	0	0	0.012248
9084	248.97	1	0	1	0	0	0	0.0122117
9086	249.003	1	0	1	0	0	0	0.0122031
9088	249.036	1	0	1	0	0	0	0.0122162
9090	249.07	1	0	1	0	0	0	0.0122242
9092	249.103	1	0	1	0	0	0	0.0122497
9094	249.136	1	0	1	0	0	0	0.0122463
9096	249.169	1	0	1	0	0	0	0.0122645
9098	249.203	1	0	1	0	0	0	0.0121787
9100	249.236	1	0	1	0	0	0	0.0122474
9102	249.269	1	0	1	0	0	0	0.0121969
9104	249.303	1	0	1	0	0	0	0.012189
9106	249.336	1	0	1	0	0	0	0.0121373
9108	249.369	1	0	1	0	0	0	0.0121322
9110	249.403	1	0	1	0	0	0	0.0121895
9112	249.436	1	0	1	0	0	0	0.0121486
9114	249.469	1	0	1	0	0	0	0.0121975
9116	249.503	1	0	1	0	0	0	0.0122395
9118	249.536	1	0	1	0	0	0	0.0122145
9120	249.569	1	0	1	0	0	0	0.0122168
9122	249.603	1	0	1	0	0	0	0.012181
9124	249.636	1	0	1	0	0	0	0.0122077
9126	249.669	1	0	1	0	0	0	0.0122071
9128	249.703	1	0	1	0	0	0	0.0122633
9130	249.736	1	0	1	0	0	0	0.0122571
9132	249.769	1	0	1	0	0	0	0.0122185
9134	249.803	1	0	1	0	0	0	0.0122066
9136	249.836	1	0	1	0	0	0	0.012177
9138	249.869	1	0	1	0	0	0	0.0121997
9140	249.903	1	0	1	0	0	0	0.0122594
9142	249.936	1	0	1	0	0	0	0.0122151
9144	249.969	1	0	1	0	0	0	0.0122298
9146	250.003	1	0	1	0	0	0	0.012156
9148	250.036	1	0	1	0	0	0	0.012118
9150	250.069	1	0	1	0	0	0	0.012244
9152	250.103	1	0	1	0	0	0	0.0121679
9154	250.136	1	0	1	0	0	0	0.0122031
9156	250.169	1	0	1	0	0	0	0.0122077
9158	250.203	1	0	1	0	0	0	0.0121685
9160	250.236	1	0	1	0	0	0	0.0121429
9162	250.269	1	0	1	0	0	0	0.0121855
9164	250.303	1	0	1	0	0	0	0.0122213
9166	250.336	1	0	1	0	0	0	0.0122304
9168	250.369	1	0	1	0	0	0	0.0122139
9170	250.403	1	0	1	0	0	0	0.0122298
9172	250.436	1	0	1	0	0	0	0.0122043
9174	250.469	1	0	1	0	0	0	0.0122401
9176	250.503	1	0	1	0	0	0	0.012189
9178	250.536	1	0	1	0	0	0	0.0122315
9180	250.569	1	0	1	0	0	0	0.0122673
9182	250.603	1	0	1	0	0	0	0.0121963
9184	250.636	1	0	1	0	0	0	0.0122412
9186	250.669	1	0	1	0	0	0	0.0122066
9188	250.703	1	0	1	0	0	0	0.012198
9190	250.736	1	0	1	0	0	0	0.0122418
9192	250.769	1	0	1	0	0	0	0.0122673
9194	250.803	1	0	1	0	0	0	0.0122719
9196	250.836	1	0	1	0	0	0	0.0122775
9198	250.869	1	0	1	0	0	0	0.0121168
9200	250.903	1	0	1	0	0	0	0.0121702
9202	250.936	1	0	1	0	0	0	0.012235
9204	250.969	1	0	1	0	0	0	0.012223
9206	251.003	1	0	1	0	0	0	0.0122225
9208	251.036	1	0	1	0	0	0	0.0122605
9210	251.069	1	0	1	0	0	0	0.0122083
9212	251.103	1	0	1	0	0	0	0.0122196
9214	251.136	1	0	1	0	0	0	0.0121907
9216	251.169	1	0	1	0	0	0	0.0122236
9218	251.203	1	0	1	0	0	0	0.0121997
9220	251.236	1	0	1	0	0	0	0.0122173
9222	251.269	1	0	1	0	0	0	0.0122168
9224	251.303	1	0	1	0	0	0	0.0122117
9226	251.336	1	0	1	0	0	0	0.0122474
9228	251.369	1	0	1	0	0	0	0.0122009
9230	251.403	1	0	1	0	0	0	0.012181
9232	251.436	1	0	1	0	0	0	0.0121606
9234	251.469	1	0	1	0	0	0	0.0121702
9236	251.503	1	0	1	0	0	0	0.0121804
9238	251.536	1	0	1	0	0	0	0.0121668
9240	251.569	1	0	1	0	0	0	0.0122412
9242	251.603	1	0	1	0	0	0	0.0122105
9244	251.636	1	0	1	0	0	0	0.012235
9246	251.669	1	0	1	0	0	0	0.0122139
9248	251.703	1	0	1	0	0	0	0.012273
9250	251.736	1	0	1	0	0	0	0.0122639
9252	251.769	1	0	1	0	0	0	0.0122247
9254	251.803	1	0	1	0	0	0	0.0122128
9256	251.836	1	0	1	0	0	0	0.0122315
9258	251.869	1	0	1	0	0	0	0.0121713
9260	251.903	1	0	1	0	0	0	0.0122111
9262	251.936	1	0	1	0	0	0	0.0122401
9264	251.969	1	0	1	0	0	0	0.0122474
9266	252.003	1	0	1	0	0	0	0.0123008
9268	252.036	1	0	1	0	0	0	0.0121929
9270	252.069	1	0	1	0	0	0	0.0122645
9272	252.103	1	0	1	0	0	0	0.0122446
9274	252.136	1	0	1	0	0	0	0.012294
9276	252.169	1	0	1	0	0	0	0.0123037
9278	252.203	1	0	1	0	0	0	0.0123094
9280	252.236	1	0	1	0	0	0	0.0122247
9282	252.269	1	0	1	0	0	0	0.012223
9284	252.303	1	0	1	0	0	0	0.0122105
9286	252.336	1	0	1	0	0	0	0.0121975
9288	252.369	1	0	1	0	0	0	0.0121821
9290	252.403	1	0	1	0	0	0	0.0121895
9292	252.436	1	0	1	0	0	0	0.0122276
9294	252.469	1	0	1	0	0	0	0.0122633
9296	252.503	1	0	1	0	0	0	0.0121838
9298	252.536	1	0	1	0	0	0	0.0122196
9300	252.569	1	0	1	0	0	0	0.0122844
9302	252.603	1	0	1	0	0	0	0.0122049
9304	252.636	1	0	1	0	0	0	0.012248
9306	252.669	1	0	1	0	0	0	0.0122213
9308	252.703	1	0	1	0	0	0	0.0121566
9310	252.736	1	0	1	0	0	0	0.0122264
9312	252.769	1	0	1	0	0	0	0.0122469
9314	252.803	1	0	1	0	0	0	0.0122548
9316	252.836	1	0	1	0	0	0	0.012206
9318	252.869	1	0	1	0	0	0	0.0121793
9320	252.903	1	0	1	0	0	0	0.0123059
9322	252.936	1	0	1	0	0	0	0.0122208
9324	252.969	1	0	1	0	0	0	0.0122332
9326	253.003	1	0	1	0	0	0	0.0122838
9328	253.036	1	0	1	0	0	0	0.0122304
9330	253.069	1	0	1	0	0	0	0.0122145
9332	253.103	1	0	1	0	0	0	0.0121867
9334	253.136	1	0	1	0	0	0	0.0122338
9336	253.169	1	0	1	0	0	0	0.0122497
9338	253.203	1	0	1	0	0	0	0.0122259
9340	253.236	1	0	1	0	0	0	0.0122185
9342	253.269	1	0	1	0	0	0	0.0122043
9344	253.303	1	0	1	0	0	0	0.0121787
9346	253.336	1	0	1	0	0	0	0.0121293
9348	253.369	1	0	1	0	0	0	0.0121753
9350	253.403	1	0	1	0	0	0	0.0122372
9352	253.436	1	0	1	0	0	0	0.0121412
9354	253.469	1	0	1	0	0	0	0.0121804
9356	253.503	1	0	1	0	0	0	0.0122185
9358	253.536	1	0	1	0	0	0	0.0121725
9360	253.569	1	0	1	0	0	0	0.0121753
9362	253.603	1	0	1	0	0	0	0.0121168
9364	253.636	1	0	1	0	0	0	0.0121992
9366	253.669	1	0	1	0	0	0	0.0122122
9368	253.703	1	0	1	0	0	0	0.01216
9370	253.736	1	0	1	0	0	0	0.0122452
9372	253.769	1	0	1	0	0	0	0.0122196
9374	253.803	1	0	1	0	0	0	0.0122418
9376	253.836	1	0	1	0	0	0	0.012181
9378	253.869	1	0	1	0	0	0	0.0122202
9380	253.903	1	0	1	0	0	0	0.012189
9382	253.936	1	0	1	0	0	0	0.0122713
9384	253.969	1	0	1	0	0	0	0.0121992
9386	254.003	1	0	1	0	0	0	0.0122173
9388	254.036	1	0	1	0	0	0	0.0121838
9390	254.069	1	0	1	0	0	0	0.0122162
9392	254.103	1	0	1	0	0	0	0.0121429
9394	254.136	1	0	1	0	0	0	0.0121861
9396	254.169	1	0	1	0	0	0	0.0121702
9398	254.203	1	0	1	0	0	0	0.012231
9400	254.236	1	0	1	0	0	0	0.0121816
9402	254.269	1	0	1	0	0	0	0.0121554
9404	254.303	1	0	1	0	0	0	0.0121833
9406	254.336	1	0	1	0	0	0	0.0121475
9408	254.369	1	0	1	0	0	0	0.0122014
9410	254.403	1	0	1	0	0	0	0.0121594
9412	254.436	1	0	1	0	0	0	0.0121447
9414	254.469	1	0	1	0	0	0	0.0121265
9416	254.503	1	0	1	0	0	0	0.0121049
9418	254.536	1	0	1	0	0	0	0.0121679
9420	254.569	1	0	1	0	0	0	0.0120856
9422	254.603	1	0	1	0	0	0	0.0120856
9424	254.636	1	0	1	0	0	0	0.0121719
9426	254.669	1	0	1	0	0	0	0.012177
9428	254.703	1	0	1	0	0	0	0.0121713
9430	254.736	1	0	1	0	0	0	0.0122014
9432	254.769	1	0	1	0	0	0	0.0121867
9434	254.803	1	0	1	0	0	0	0.0121872
9436	254.836	1	0	1	0	0	0	0.0122043
9438	254.869	1	0	1	0	0	0	0.012185
9440	254.903	1	0	1	0	0	0	0.0121549
9442	254.936	1	0	1	0	0	0	0.0121861
9444	254.969	1	0	1	0	0	0	0.0121958
9446	255.003	1	0	1	0	0	0	0.0121736
9448	255.036	1	0	1	0	0	0	0.0122077
9450	255.069	1	0	1	0	0	0	0.0121333
9452	255.103	1	0	1	0	0	0	0.012177
9454	255.136	1	0	1	0	0	0	0.0121606
9456	255.169	1	0	1	0	0	0	0.0122162
9458	255.203	1	0	1	0	0	0	0.0121958
9460	255.236	1	0	1	0	0	0	0.0121702
9462	255.269	1	0	1	0	0	0	0.0121299
9464	255.303	1	0	1	0	0	0	0.0121628
9466	255.336	1	0	1	0	0	0	0.0121577
9468	255.369	1	0	1	0	0	0	0.0121941
9470	255.403	1	0	1	0	0	0	0.0122139
9472	255.436	1	0	1	0	0	0	0.0121623
9474	255.469	1	0	1	0	0	0	0.012189
9476	255.503	1	0	1	0	0	0	0.0121628
9478	255.536	1	0	1	0	0	0	0.012118
9480	255.569	1	0	1	0	0	0	0.0121356
9482	255.603	1	0	1	0	0	0	0.0121168
9484	255.636	1	0	1	0	0	0	0.0121146
9486	255.669	1	0	1	0	0	0	0.0121696
9488	255.703	1	0	1	0	0	0	0.0121197
9490	255.736	1	0	1	0	0	0	0.0121526
9492	255.769	1	0	1	0	0	0	0.0121742
9494	255.803	1	0	1	0	0	0	0.0121464
9496	255.836	1	0	1	0	0	0	0.0121912
9498	255.869	1	0	1	0	0	0	0.0121407
9500	255.903	1	0	1	0	0	0	0.0121038
9502	255.936	1	0	1	0	0	0	0.0121248
9504	255.969	1	0	1	0	0	0	0.0121356
9506	256.003	1	0	1	0	0	0	0.0121168
9508	256.036	1	0	1	0	0	0	0.0121662
9510	256.069	1	0	1	0	0	0	0.0120322
9512	256.103	1	0	1	0	0	0	0.0121645
9514	256.136	1	0	1	0	0	0	0.0122253
9516	256.169	1	0	1	0	0	0	0.0121566
9518	256.203	1	0	1	0	0	0	0.0121498
9520	256.236	1	0	1	0	0	0	0.0121282
9522	256.269	1	0	1	0	0	0	0.0121038
9524	256.303	1	0	1	0	0	0	0.0121344
9526	256.336	1	0	1	0	0	0	0.0122236
9528	256.369	1	0	1	0	0	0	0.0121384
9530	256.403	1	0	1	0	0	0	0.0122332
9532	256.436	1	0	1	0	0	0	0.0121628
9534	256.469	1	0	1	0	0	0	0.0122287
9536	256.503	1	0	1	0	0	0	0.0122213
9538	256.536	1	0	1	0	0	0	0.0121526
9540	256.569	1	0	1	0	0	0	0.012206
9542	256.603	1	0	1	0	0	0	0.0121594
9544	256.636	1	0	1	0	0	0	0.012164
9546	256.669	1	0	1	0	0	0	0.0121787
9548	256.703	1	0	1	0	0	0	0.0121941
9550	256.736	1	0	1	0	0	0	0.0121787
9552	256.769	1	0	1	0	0	0	0.012173
9554	256.803	1	0	1	0	0	0	0.0121429
9556	256.836	1	0	1	0	0	0	0.0122111
9558	256.869	1	0	1	0	0	0	0.0122321
9560	256.903	1	0	1	0	0	0	0.0121759
9562	256.936	1	0	1	0	0	0	0.01221
9564	256.969	1	0	1	0	0	0	0.0122361
9566	257.002	1	0	1	0	0	0	0.012235
9568	257.036	1	0	1	0	0	0	0.0121713
9570	257.069	1	0	1	0	0	0	0.0122083
9572	257.102	1	0	1	0	0	0	0.0122861
9574	257.136	1	0	1	0	0	0	0.0122185
9576	257.169	1	0	1	0	0	0	0.012202
9578	257.202	1	0	1	0	0	0	0.0121288
9580	257.236	1	0	1	0	0	0	0.0121288
9582	257.269	1	0	1	0	0	0	0.0121481
9584	257.302	1	0	1	0	0	0	0.0121208
9586	257.336	1	0	1	0	0	0	0.0122009
9588	257.369	1	0	1	0	0	0	0.0121191
9590	257.402	1	0	1	0	0	0	0.0121248
9592	257.436	1	0	1	0	0	0	0.012131
9594	257.469	1	0	1	0	0	0	0.0121333
9596	257.502	1	0	1	0	0	0	0.0121628
9598	257.536	1	0	1	0	0	0	0.0121793
9600	257.569	1	0	1	0	0	0	0.0121424
9602	257.602	1	0	1	0	0	0	0.0121657
9604	257.636	1	0	1	0	0	0	0.0121651
9606	257.669	1	0	1	0	0	0	0.0121094
9608	257.702	1	0	1	0	0	0	0.0121509
9610	257.736	1	0	1	0	0	0	0.0121032
9612	257.769	1	0	1	0	0	0	0.012202
9614	257.802	1	0	1	0	0	0	0.0121407
9616	257.836	1	0	1	0	0	0	0.0121407
9618	257.869	1	0	1	0	0	0	0.0121231
9620	257.902	1	0	1	0	0	0	0.0121492
9622	257.936	1	0	1	0	0	0	0.0120952
9624	257.969	1	0	1	0	0	0	0.0121515
9626	258.002	1	0	1	0	0	0	0.0121509
9628	258.036	1	0	1	0	0	0	0.0121458
9630	258.069	1	0	1	0	0	0	0.0121441
9632	258.102	1	0	1	0	0	0	0.0121492
9634	258.136	1	0	1	0	0	0	0.01211
9636	258.169	1	0	1	0	0	0	0.0121793
9638	258.202	1	0	1	0	0	0	0.0122031
9640	258.236	1	0	1	0	0	0	0.0121668
9642	258.269	1	0	1	0	0	0	0.0121685
9644	258.302	1	0	1	0	0	0	0.0121691
9646	258.336	1	0	1	0	0	0	0.0122565
9648	258.369	1	0	1	0	0	0	0.0121367
9650	258.402	1	0	1	0	0	0	0.0121503
9652	258.436	1	0	1	0	0	0	0.0121571
9654	258.469	1	0	1	0	0	0	0.0121691
9656	258.502	1	0	1	0	0	0	0.012206
9658	258.536	1	0	1	0	0	0	0.0121594
9660	258.569	1	0	1	0	0	0	0.0121748
9662	258.602	1	0	1	0	0	0	0.0121606
9664	258.636	1	0	1	0	0	0	0.012202
9666	258.669	1	0	1	0	0	0	0.0121356
9668	258.702	1	0	1	0	0	0	0.0121492
9670	258.736	1	0	1	0	0	0	0.0121594
9672	258.769	1	0	1	0	0	0	0.0122066
9674	258.802	1	0	1	0	0	0	0.0121918
9676	258.836	1	0	1	0	0	0	0.0121929
9678	258.869	1	0	1	0	0	0	0.0121623
9680	258.902	1	0	1	0	0	0	0.0121475
9682	258.936	1	0	1	0	0	0	0.0121202
9684	258.969	1	0	1	0	0	0	0.0121248
9686	259.002	1	0	1	0	0	0	0.0121765
9688	259.036	1	0	1	0	0	0	0.0121242
9690	259.069	1	0	1	0	0	0	0.0121055
9692	259.102	1	0	1	0	0	0	0.0121373
9694	259.136	1	0	1	0	0	0	0.0121146
9696	259.169	1	0	1	0	0	0	0.012081
9698	259.202	1	0	1	0	0	0	0.0121151
9700	259.236	1	0	1	0	0	0	0.0121089
9702	259.269	1	0	1	0	0	0	0.0121322
9704	259.302	1	0	1	0	0	0	0.0120941
9706	259.336	1	0	1	0	0	0	0.0120782
9708	259.369	1	0	1	0	0	0	0.0121645
9710	259.402	1	0	1	0	0	0	0.0121174
9712	259.436	1	0	1	0	0	0	0.0121685
9714	259.469	1	0	1	0	0	0	0.012152
9716	259.502	1	0	1	0	0	0	0.0121117
9718	259.536	1	0	1	0	0	0	0.0121305
9720	259.569	1	0	1	0	0	0	0.0121282
9722	259.602	1	0	1	0	0	0	0.0121259
9724	259.636	1	0	1	0	0	0	0.0121111
9726	259.669	1	0	1	0	0	0	0.0121776
9728	259.702	1	0	1	0	0	0	0.0121719
9730	259.736	1	0	1	0	0	0	0.0121458
9732	259.769	1	0	1	0	0	0	0.0122162
9734	259.802	1	0	1	0	0	0	0.0121793
9736	259.836	1	0	1	0	0	0	0.012181
9738	259.869	1	0	1	0	0	0	0.0121418
9740	259.902	1	0	1	0	0	0	0.0120873
9742	259.936	1	0	1	0	0	0	0.0121492
9744	259.969	1	0	1	0	0	0	0.0122259
9746	260.002	1	0	1	0	0	0	0.0121611
9748	260.036	1	0	1	0	0	0	0.0121316
9750	260.069	1	0	1	0	0	0	0.0121367
9752	260.102	1	0	1	0	0	0	0.0121469
9754	260.136	1	0	1	0	0	0	0.0121833
9756	260.169	1	0	1	0	0	0	0.0121429
9758	260.202	1	0	1	0	0	0	0.0121679
9760	260.236	1	0	1	0	0	0	0.0121049
9762	260.269	1	0	1	0	0	0	0.0121242
9764	260.302	1	0	1	0	0	0	0.0121662
9766	260.336	1	0	1	0	0	0	0.0120935
9768	260.369	1	0	1	0	0	0	0.0121293
9770	260.402	1	0	1	0	0	0	0.0121185
9772	260.436	1	0	1	0	0	0	0.0121549
9774	260.469	1	0	1	0	0	0	0.0121657
9776	260.502	1	0	1	0	0	0	0.0121009
9778	260.536	1	0	1	0	0	0	0.0121816
9780	260.569	1	0	1	0	0	0	0.0121242
9782	260.602	1	0	1	0	0	0	0.0121571
9784	260.636	1	0	1	0	0	0	0.0121583
9786	260.669	1	0	1	0	0	0	0.0121833
9788	260.702	1	0	1	0	0	0	0.0121441
9790	260.736	1	0	1	0	0	0	0.0120748
9792	260.769	1	0	1	0	0	0	0.012106
9794	260.802	1	0	1	0	0	0	0.0121782
9796	260.836	1	0	1	0	0	0	0.01211
9798	260.869	1	0	1	0	0	0	0.0121594
9800	260.902	1	0	1	0	0	0	0.0120703
9802	260.936	1	0	1	0	0	0	0.012068
9804	260.969	1	0	1	0	0	0	0.01216
9806	261.002	1	0	1	0	0	0	0.0121327
9808	261.036	1	0	1	0	0	0	0.012164
9810	261.069	1	0	1	0	0	0	0.0121356
9812	261.102	1	0	1	0	0	0	0.0121282
9814	261.136	1	0	1	0	0	0	0.0121963
9816	261.169	1	0	1	0	0	0	0.0121418
9818	261.202	1	0	1	0	0	0	0.0121691
9820	261.236	1	0	1	0	0	0	0.0121219
9822	261.269	1	0	1	0	0	0	0.0120986
9824	261.302	1	0	1	0	0	0	0.0121208
9826	261.336	1	0	1	0	0	0	0.0121424
9828	261.369	1	0	1	0	0	0	0.012139
9830	261.402	1	0	1	0	0	0	0.0121168
9832	261.436	1	0	1	0	0	0	0.0121736
9834	261.469	1	0	1	0	0	0	0.0121537
9836	261.502	1	0	1	0	0	0	0.0121395
9838	261.536	1	0	1	0	0	0	0.0121197
9840	261.569	1	0	1	0	0	0	0.0121151
9842	261.602	1	0	1	0	0	0	0.0121197
9844	261.636	1	0	1	0	0	0	0.0121259
9846	261.669	1	0	1	0	0	0	0.012152
9848	261.702	1	0	1	0	0	0	0.0121117
9850	261.736	1	0	1	0	0	0	0.0121361
9852	261.769	1	0	1	0	0	0	0.0121617
9854	261.802	1	0	1	0	0	0	0.0121526
9856	261.836	1	0	1	0	0	0	0.0121793
9858	261.869	1	0	1	0	0	0	0.0121038
9860	261.902	1	0	1	0	0	0	0.0121004
9862	261.936	1	0	1	0	0	0	0.0121282
9864	261.969	1	0	1	0	0	0	0.0121719
9866	262.002	1	0	1	0	0	0	0.012093
9868	262.036	1	0	1	0	0	0	0.0121753
9870	262.069	1	0	1	0	0	0	0.0121861
9872	262.102	1	0	1	0	0	0	0.0121855
9874	262.136	1	0	1	0	0	0	0.0122094
9876	262.169	1	0	1	0	0	0	0.0121816
9878	262.202	1	0	1	0	0	0	0.012164
9880	262.236	1	0	1	0	0	0	0.0121623
9882	262.269	1	0	1	0	0	0	0.0121219
9884	262.302	1	0	1	0	0	0	0.0120986
9886	262.336	1	0	1	0	0	0	0.0120992
9888	262.369	1	0	1	0	0	0	0.0121214
9890	262.402	1	0	1	0	0	0	0.0120964
9892	262.436	1	0	1	0	0	0	0.0120754
9894	262.469	1	0	1	0	0	0	0.0121146
9896	262.502	1	0	1	0	0	0	0.0121662
9898	262.536	1	0	1	0	0	0	0.0121412
9900	262.569	1	0	1	0	0	0	0.0120986
9902	262.602	1	0	1	0	0	0	0.0121242
9904	262.636	1	0	1	0	0	0	0.0121253
9906	262.669	1	0	1	0	0	0	0.0121333
9908	262.702	1	0	1	0	0	0	0.0121532
9910	262.736	1	0	1	0	0	0	0.0121804
9912	262.769	1	0	1	0	0	0	0.0120742
9914	262.802	1	0	1	0	0	0	0.012164
9916	262.836	1	0	1	0	0	0	0.0121645
9918	262.869	1	0	1	0	0	0	0.0120737
9920	262.902	1	0	1	0	0	0	0.0121492
9922	262.936	1	0	1	0	0	0	0.0121509
9924	262.969	1	0	1	0	0	0	0.012106
9926	263.002	1	0	1	0	0	0	0.0120907
9928	263.036	1	0	1	0	0	0	0.0120947
9930	263.069	1	0	1	0	0	0	0.0120896
9932	263.102	1	0	1	0	0	0	0.012043
9934	263.136	1	0	1	0	0	0	0.0121032
9936	263.169	1	0	1	0	0	0	0.0121395
9938	263.202	1	0	1	0	0	0	0.0121174
9940	263.236	1	0	1	0	0	0	0.0120998
9942	263.269	1	0	1	0	0	0	0.0121282
9944	263.302	1	0	1	0	0	0	0.0121077
9946	263.336	1	0	1	0	0	0	0.0121736
9948	263.369	1	0	1	0	0	0	0.0120538
9950	263.402	1	0	1	0	0	0	0.0120748
9952	263.436	1	0	1	0	0	0	0.0120663
9954	263.469	1	0	1	0	0	0	0.0120583
9956	263.502	1	0	1	0	0	0	0.0120623
9958	263.536	1	0	1	0	0	0	0.012127
9960	263.569	1	0	1	0	0	0	0.0121174
9962	263.602	1	0	1	0	0	0	0.0120947
9964	263.636	1	0	1	0	0	0	0.0121021
9966	263.669	1	0	1	0	0	0	0.0121197
9968	263.702	1	0	1	0	0	0	0.0120952
9970	263.736	1	0	1	0	0	0	0.0121083
9972	263.769	1	0	1	0	0	0	0.0121259
9974	263.802	1	0	1	0	0	0	0.0120799
9976	263.836	1	0	1	0	0	0	0.0121151
9978	263.869	1	0	1	0	0	0	0.012139
9980	263.902	1	0	1	0	0	0	0.0121583
9982	263.936	1	0	1	0	0	0	0.0121668
9984	263.969	1	0	1	0	0	0	0.0121134
9986	264.002	1	0	1	0	0	0	0.0122276
9988	264.036	1	0	1	0	0	0	0.0121168
9990	264.069	1	0	1	0	0	0	0.0121867
9992	264.102	1	0	1	0	0	0	0.0121685
9994	264.136	1	0	1	0	0	0	0.0121163
9996	264.169	1	0	1	0	0	0	0.0121253
9998	264.202	1	0	1	0	0	0	0.0120714
10000	264.236	1	0	1	0	0	0	0.0121918
10002	264.269	1	0	1	0	0	0	0.0121867
10004	264.302	1	0	1	0	0	0	0.0121225
10006	264.336	1	0	1	0	0	0	0.0121702
10008	264.369	1	0	1	0	0	0	0.0120839
10010	264.402	1	0	1	0	0	0	0.012152
10012	264.436	1	0	1	0	0	0	0.0122145
10014	264.469	1	0	1	0	0	0	0.0121895
10016	264.502	1	0	1	0	0	0	0.0121816
10018	264.536	1	0	1	0	0	0	0.0121986
10020	264.569	1	0	1	0	0	0	0.0121753
10022	264.602	1	0	1	0	0	0	0.0121833
10024	264.636	1	0	1	0	0	0	0.0121412
10026	264.669	1	0	1	0	0	0	0.0121151
10028	264.702	1	0	1	0	0	0	0.0121447
10030	264.736	1	0	1	0	0	0	0.0121174
10032	264.769	1	0	1	0	0	0	0.0121225
10034	264.802	1	0	1	0	0	0	0.0121407
10036	264.836	1	0	1	0	0	0	0.0122037
10038	264.869	1	0	1	0	0	0	0.0121373
10040	264.902	1	0	1	0	0	0	0.0120867
10042	264.936	1	0	1	0	0	0	0.0121134
10044	264.969	1	0	1	0	0	0	0.0120884
10046	265.002	1	0	1	0	0	0	0.0121072
10048	265.036	1	0	1	0	0	0	0.0120623
10050	265.069	1	0	1	0	0	0	0.0121265
10052	265.102	1	0	1	0	0	0	0.0120481
10054	265.136	1	0	1	0	0	0	0.0120737
10056	265.169	1	0	1	0	0	0	0.0121356
10058	265.202	1	0	1	0	0	0	0.0120986
10060	265.236	1	0	1	0	0	0	0.0120986
10062	265.269	1	0	1	0	0	0	0.0121202
10064	265.302	1	0	1	0	0	0	0.0121134
10066	265.336	1	0	1	0	0	0	0.0121009
10068	265.369	1	0	1	0	0	0	0.0120964
10070	265.402	1	0	1	0	0	0	0.012047
10072	265.436	1	0	1	0	0	0	0.0121429
10074	265.469	1	0	1	0	0	0	0.0120873
10076	265.502	1	0	1	0	0	0	0.0121623
10078	265.535	1	0	1	0	0	0	0.0121066
10080	265.569	1	0	1	0	0	0	0.0121021
10082	265.602	1	0	1	0	0	0	0.0121106
10084	265.635	1	0	1	0	0	0	0.0121225
10086	265.669	1	0	1	0	0	0	0.0122151
10088	265.702	1	0	1	0	0	0	0.0121191
10090	265.735	1	0	1	0	0	0	0.0121242
10092	265.769	1	0	1	0	0	0	0.0121753
10094	265.802	1	0	1	0	0	0	0.0121628
10096	265.835	1	0	1	0	0	0	0.0121691
10098	265.869	1	0	1	0	0	0	0.0122321
10100	265.902	1	0	1	0	0	0	0.0121276
10102	265.935	1	0	1	0	0	0	0.0121679
10104	265.969	1	0	1	0	0	0	0.0121146
10106	266.002	1	0	1	0	0	0	0.0120964
10108	266.035	1	0	1	0	0	0	0.0121378
10110	266.069	1	0	1	0	0	0	0.0122418
10112	266.102	1	0	1	0	0	0	0.0120913
10114	266.135	1	0	1	0	0	0	0.0120612
10116	266.169	1	0	1	0	0	0	0.0120248
10118	266.202	1	0	1	0	0	0	0.0120947
10120	266.235	1	0	1	0	0	0	0.0121157
10122	266.269	1	0	1	0	0	0	0.0121305
10124	266.302	1	0	1	0	0	0	0.0121526
10126	266.335	1	0	1	0	0	0	0.012106
10128	266.369	1	0	1	0	0	0	0.012114
10130	266.402	1	0	1	0	0	0	0.0121214
10132	266.435	1	0	1	0	0	0	0.0121344
10134	266.469	1	0	1	0	0	0	0.0120998
10136	266.502	1	0	1	0	0	0	0.0120657
10138	266.535	1	0	1	0	0	0	0.0121458
10140	266.569	1	0	1	0	0	0	0.0120839
10142	266.602	1	0	1	0	0	0	0.012131
10144	266.635	1	0	1	0	0	0	0.0121225
10146	266.669	1	0	1	0	0	0	0.0120822
10148	266.702	1	0	1	0	0	0	0.012118
10150	266.735	1	0	1	0	0	0	0.0120782
10152	266.769	1	0	1	0	0	0	0.0120907
10154	266.802	1	0	1	0	0	0	0.0121526
10156	266.835	1	0	1	0	0	0	0.0121083
10158	266.869	1	0	1	0	0	0	0.0121225
10160	266.902	1	0	1	0	0	0	0.0120657
10162	266.935	1	0	1	0	0	0	0.0120742
10164	266.969	1	0	1	0	0	0	0.0120333
10166	267.002	1	0	1	0	0	0	0.0120544
10168	267.035	1	0	1	0	0	0	0.0120805
10170	267.069	1	0	1	0	0	0	0.0120237
10172	267.102	1	0	1	0	0	0	0.0120072
10174	267.135	1	0	1	0	0	0	0.0121049
10176	267.169	1	0	1	0	0	0	0.0120504
10178	267.202	1	0	1	0	0	0	0.0120413
10180	267.235	1	0	1	0	0	0	0.0120691
10182	267.269	1	0	1	0	0	0	0.0120714
10184	267.302	1	0	1	0	0	0	0.0121094
10186	267.335	1	0	1	0	0	0	0.012131
10188	267.369	1	0	1	0	0	0	0.0120453
10190	267.402	1	0	1	0	0	0	0.0121066
10192	267.435	1	0	1	0	0	0	0.0120362
10194	267.469	1	0	1	0	0	0	0.0121009
10196	267.502	1	0	1	0	0	0	0.012118
10198	267.535	1	0	1	0	0	0	0.0120873
10200	267.569	1	0	1	0	0	0	0.0121492
10202	267.602	1	0	1	0	0	0	0.0121884
10204	267.635	1	0	1	0	0	0	0.0121884
10206	267.669	1	0	1	0	0	0	0.012173
10208	267.702	1	0	1	0	0	0	0.0121066
10210	267.735	1	0	1	0	0	0	0.012106
10212	267.769	1	0	1	0	0	0	0.0121191
10214	267.802	1	0	1	0	0	0	0.0120572
10216	267.835	1	0	1	0	0	0	0.0120992
10218	267.869	1	0	1	0	0	0	0.0120424
10220	267.902	1	0	1	0	0	0	0.0121055
10222	267.935	1	0	1	0	0	0	0.0120623
10224	267.969	1	0	1	0	0	0	0.0120793
10226	268.002	1	0	1	0	0	0	0.012089
10228	268.035	1	0	1	0	0	0	0.0120663
10230	268.069	1	0	1	0	0	0	0.0120788
10232	268.102	1	0	1	0	0	0	0.0120578
10234	268.135	1	0	1	0	0	0	0.0120481
10236	268.169	1	0	1	0	0	0	0.0120663
10238	268.202	1	0	1	0	0	0	0.01211
10240	268.235	1	0	1	0	0	0	0.0120237
10242	268.269	1	0	1	0	0	0	0.0121151
10244	268.302	1	0	1	0	0	0	0.0120634
10246	268.335	1	0	1	0	0	0	0.0120703
10248	268.369	1	0	1	0	0	0	0.012085
10250	268.402	1	0	1	0	0	0	0.012089
10252	268.435	1	0	1	0	0	0	0.0121043
10254	268.469	1	0	1	0	0	0	0.0121157
10256	268.502	1	0	1	0	0	0	0.0121077
10258	268.535	1	0	1	0	0	0	0.01206
10260	268.569	1	0	1	0	0	0	0.0120191
10262	268.602	1	0	1	0	0	0	0.0120771
10264	268.635	1	0	1	0	0	0	0.0120873
10266	268.669	1	0	1	0	0	0	0.0120856
10268	268.702	1	0	1	0	0	0	0.0120583
10270	268.735	1	0	1	0	0	0	0.0121202
10272	268.769	1	0	1	0	0	0	0.0120913
10274	268.802	1	0	1	0	0	0	0.0120373
10276	268.835	1	0	1	0	0	0	0.0121202
10278	268.869	1	0	1	0	0	0	0.0121543
10280	268.902	1	0	1	0	0	0	0.0120685
10282	268.935	1	0	1	0	0	0	0.0121412
10284	268.969	1	0	1	0	0	0	0.0120986
10286	269.002	1	0	1	0	0	0	0.0121288
10288	269.035	1	0	1	0	0	0	0.012064
10290	269.069	1	0	1	0	0	0	0.0120532
10292	269.102	1	0	1	0	0	0	0.0120839
10294	269.135	1	0	1	0	0	0	0.0120521
10296	269.169	1	0	1	0	0	0	0.0121026
10298	269.202	1	0	1	0	0	0	0.0120237
10300	269.235	1	0	1	0	0	0	0.0120532
10302	269.269	1	0	1	0	0	0	0.0120629
10304	269.302	1	0	1	0	0	0	0.0120879
10306	269.335	1	0	1	0	0	0	0.0120969
10308	269.369	1	0	1	0	0	0	0.0121441
10310	269.402	1	0	1	0	0	0	0.0120862
10312	269.435	1	0	1	0	0	0	0.0120935
10314	269.469	1	0	1	0	0	0	0.0120896
10316	269.502	1	0	1	0	0	0	0.0120419
10318	269.535	1	0	1	0	0	0	0.0120799
10320	269.569	1	0	1	0	0	0	0.0121009
10322	269.602	1	0	1	0	0	0	0.0121322
10324	269.635	1	0	1	0	0	0	0.0120646
10326	269.669	1	0	1	0	0	0	0.0120521
10328	269.702	1	0	1	0	0	0	0.0121004
10330	269.735	1	0	1	0	0	0	0.0120782
10332	269.769	1	0	1	0	0	0	0.0120958
10334	269.802	1	0	1	0	0	0	0.0120981
10336	269.835	1	0	1	0	0	0	0.0120873
10338	269.869	1	0	1	0	0	0	0.0120935
10340	269.902	1	0	1	0	0	0	0.0120731
10342	269.935	1	0	1	0	0	0	0.0121055
10344	269.969	1	0	1	0	0	0	0.0120788
10346	270.002	1	0	1	0	0	0	0.0120254
10348	270.035	1	0	1	0	0	0	0.0121134
10350	270.069	1	0	1	0	0	0	0.0120396
10352	270.102	1	0	1	0	0	0	0.0121055
10354	270.135	1	0	1	0	0	0	0.0120765
10356	270.169	1	0	1	0	0	0	0.0120856
10358	270.202	1	0	1	0	0	0	0.0120396
10360	270.235	1	0	1	0	0	0	0.0120646
10362	270.269	1	0	1	0	0	0	0.0121452
10364	270.302	1	0	1	0	0	0	0.0121117
10366	270.335	1	0	1	0	0	0	0.0119998
10368	270.369	1	0	1	0	0	0	0.0120964
10370	270.402	1	0	1	0	0	0	0.0121475
10372	270.435	1	0	1	0	0	0	0.0121452
10374	270.469	1	0	1	0	0	0	0.0121838
10376	270.502	1	0	1	0	0	0	0.0121191
10378	270.535	1	0	1	0	0	0	0.0121395
10380	270.569	1	0	1	0	0	0	0.0121225
10382	270.602	1	0	1	0	0	0	0.0120958
10384	270.635	1	0	1	0	0	0	0.0121004
10386	270.669	1	0	1	0	0	0	0.012135
10388	270.702	1	0	1	0	0	0	0.0120742
10390	270.735	1	0	1	0	0	0	0.0121026
10392	270.769	1	0	1	0	0	0	0.0121055
10394	270.802	1	0	1	0	0	0	0.0121055
10396	270.835	1	0	1	0	0	0	0.0120867
10398	270.869	1	0	1	0	0	0	0.0120169
10400	270.902	1	0	1	0	0	0	0.0120583
10402	270.935	1	0	1	0	0	0	0.0121049
10404	270.969	1	0	1	0	0	0	0.0120776
10406	271.002	1	0	1	0	0	0	0.012064
10408	271.035	1	0	1	0	0	0	0.0120646
10410	271.069	1	0	1	0	0	0	0.0120668
10412	271.102	1	0	1	0	0	0	0.0120924
10414	271.135	1	0	1	0	0	0	0.0121004
10416	271.169	1	0	1	0	0	0	0.0120879
10418	271.202	1	0	1	0	0	0	0.0120583
10420	271.235	1	0	1	0	0	0	0.0120742
10422	271.269	1	0	1	0	0	0	0.0120776
10424	271.302	1	0	1	0	0	0	0.0120356
10426	271.335	1	0	1	0	0	0	0.0120771
10428	271.369	1	0	1	0	0	0	0.0120225
10430	271.402	1	0	1	0	0	0	0.0120805
10432	271.435	1	0	1	0	0	0	0.0120725
10434	271.469	1	0	1	0	0	0	0.0120407
10436	271.502	1	0	1	0	0	0	0.0121021
10438	271.535	1	0	1	0	0	0	0.0120612
10440	271.569	1	0	1	0	0	0	0.0120487
10442	271.602	1	0	1	0	0	0	0.0120532
10444	271.635	1	0	1	0	0	0	0.0121458
10446	271.669	1	0	1	0	0	0	0.0121305
10448	271.702	1	0	1	0	0	0	0.0120742
10450	271.735	1	0	1	0	0	0	0.0120805
10452	271.769	1	0	1	0	0	0	0.0120668
10454	271.802	1	0	1	0	0	0	0.0121157
10456	271.835	1	0	1	0	0	0	0.0121117
10458	271.869	1	0	1	0	0	0	0.0120725
10460	271.902	1	0	1	0	0	0	0.0120674
10462	271.935	1	0	1	0	0	0	0.012106
10464	271.969	1	0	1	0	0	0	0.0121191
10466	272.002	1	0	1	0	0	0	0.0120845
10468	272.035	1	0	1	0	0	0	0.0120617
10470	272.069	1	0	1	0	0	0	0.0120918
10472	272.102	1	0	1	0	0	0	0.0120509
10474	272.135	1	0	1	0	0	0	0.012068
10476	272.169	1	0	1	0	0	0	0.0119976
10478	272.202	1	0	1	0	0	0	0.0119993
10480	272.235	1	0	1	0	0	0	0.0120225
10482	272.269	1	0	1	0	0	0	0.0120822
10484	272.302	1	0	1	0	0	0	0.0120384
10486	272.335	1	0	1	0	0	0	0.012072
10488	272.369	1	0	1	0	0	0	0.0120663
10490	272.402	1	0	1	0	0	0	0.0119822
10492	272.435	1	0	1	0	0	0	0.0120225
10494	272.469	1	0	1	0	0	0	0.0120657
10496	272.502	1	0	1	0	0	0	0.0119868
10498	272.535	1	0	1	0	0	0	0.0119618
10500	272.569	1	0	1	0	0	0	0.0119862
10502	272.602	1	0	1	0	0	0	0.011947
10504	272.635	1	0	1	0	0	0	0.0119731
10506	272.669	1	0	1	0	0	0	0.0119669
10508	272.702	1	0	1	0	0	0	0.0120277
10510	272.735	1	0	1	0	0	0	0.011993
10512	272.769	1	0	1	0	0	0	0.011997
10514	272.802	1	0	1	0	0	0	0.0120384
10516	272.835	1	0	1	0	0	0	0.0119987
10518	272.869	1	0	1	0	0	0	0.0119584
10520	272.902	1	0	1	0	0	0	0.012001
10522	272.935	1	0	1	0	0	0	0.0120311
10524	272.969	1	0	1	0	0	0	0.0119987
10526	273.002	1	0	1	0	0	0	0.0119476
10528	273.035	1	0	1	0	0	0	0.0120106
10530	273.069	1	0	1	0	0	0	0.0119919
10532	273.102	1	0	1	0	0	0	0.0120095
10534	273.135	1	0	1	0	0	0	0.0120538
10536	273.169	1	0	1	0	0	0	0.0120208
10538	273.202	1	0	1	0	0	0	0.0120038
10540	273.235	1	0	1	0	0	0	0.0119902
10542	273.269	1	0	1	0	0	0	0.0120032
10544	273.302	1	0	1	0	0	0	0.0120396
10546	273.335	1	0	1	0	0	0	0.0120589
10548	273.369	1	0	1	0	0	0	0.0120396
10550	273.402	1	0	1	0	0	0	0.0120066
10552	273.435	1	0	1	0	0	0	0.0120651
10554	273.469	1	0	1	0	0	0	0.0120407
10556	273.502	1	0	1	0	0	0	0.0120146
10558	273.535	1	0	1	0	0	0	0.011968
10560	273.569	1	0	1	0	0	0	0.0120078
10562	273.602	1	0	1	0	0	0	0.0119601
10564	273.635	1	0	1	0	0	0	0.0120089
10566	273.669	1	0	1	0	0	0	0.0120464
10568	273.702	1	0	1	0	0	0	0.0120458
10570	273.735	1	0	1	0	0	0	0.0120174
10572	273.769	1	0	1	0	0	0	0.0120214
10574	273.802	1	0	1	0	0	0	0.0119964
10576	273.835	1	0	1	0	0	0	0.0120714
10578	273.869	1	0	1	0	0	0	0.0120106
10580	273.902	1	0	1	0	0	0	0.0120095
10582	273.935	1	0	1	0	0	0	0.0119959
10584	273.969	1	0	1	0	0	0	0.0120254
10586	274.002	1	0	1	0	0	0	0.0120089
10588	274.035	1	0	1	0	0	0	0.0119976
10590	274.069	1	0	1	0	0	0	0.0120441
10592	274.102	1	0	1	0	0	0	0.0120492
10594	274.135	1	0	1	0	0	0	0.0120322
10596	274.168	1	0	1	0	0	0	0.0119737
10598	274.202	1	0	1	0	0	0	0.0120294
10600	274.235	1	0	1	0	0	0	0.0120759
10602	274.268	1	0	1	0	0	0	0.0120617
10604	274.302	1	0	1	0	0	0	0.0120311
10606	274.335	1	0	1	0	0	0	0.0119964
10608	274.368	1	0	1	0	0	0	0.0120225
10610	274.402	1	0	1	0	0	0	0.0120379
10612	274.435	1	0	1	0	0	0	0.0120282
10614	274.468	1	0	1	0	0	0	0.0119703
10616	274.502	1	0	1	0	0	0	0.0119782
10618	274.535	1	0	1	0	0	0	0.012022
10620	274.568	1	0	1	0	0	0	0.0119629
10622	274.602	1	0	1	0	0	0	0.0120583
10624	274.635	1	0	1	0	0	0	0.0120254
10626	274.668	1	0	1	0	0	0	0.0120265
10628	274.702	1	0	1	0	0	0	0.0120515
10630	274.735	1	0	1	0	0	0	0.0120799
10632	274.768	1	0	1	0	0	0	0.0120583
10634	274.802	1	0	1	0	0	0	0.0120657
10636	274.835	1	0	1	0	0	0	0.0120612
10638	274.868	1	0	1	0	0	0	0.0121083
10640	274.902	1	0	1	0	0	0	0.0121316
10642	274.935	1	0	1	0	0	0	0.0121128
10644	274.968	1	0	1	0	0	0	0.0120657
10646	275.002	1	0	1	0	0	0	0.0120475
10648	275.035	1	0	1	0	0	0	0.0120884
10650	275.068	1	0	1	0	0	0	0.0120947
10652	275.102	1	0	1	0	0	0	0.0121208
10654	275.135	1	0	1	0	0	0	0.0121117
10656	275.168	1	0	1	0	0	0	0.0120975
10658	275.202	1	0	1	0	0	0	0.0120282
10660	275.235	1	0	1	0	0	0	0.0119981
10662	275.268	1	0	1	0	0	0	0.0120487
10664	275.302	1	0	1	0	0	0	0.0120282
10666	275.335	1	0	1	0	0	0	0.0120617
10668	275.368	1	0	1	0	0	0	0.0120203
10670	275.402	1	0	1	0	0	0	0.0120424
10672	275.435	1	0	1	0	0	0	0.0120322
10674	275.468	1	0	1	0	0	0	0.0119771
10676	275.502	1	0	1	0	0	0	0.0119794
10678	275.535	1	0	1	0	0	0	0.0119567
10680	275.568	1	0	1	0	0	0	0.0120095
10682	275.602	1	0	1	0	0	0	0.0119981
10684	275.635	1	0	1	0	0	0	0.0120254
10686	275.668	1	0	1	0	0	0	0.011972
10688	275.702	1	0	1	0	0	0	0.0119623
10690	275.735	1	0	1	0	0	0	0.011926
10692	275.768	1	0	1	0	0	0	0.0120305
10694	275.802	1	0	1	0	0	0	0.0120561
10696	275.835	1	0	1	0	0	0	0.0120021
10698	275.868	1	0	1	0	0	0	0.0119953
10700	275.902	1	0	1	0	0	0	0.0120208
10702	275.935	1	0	1	0	0	0	0.0120572
10704	275.968	1	0	1	0	0	0	0.01211
10706	276.002	1	0	1	0	0	0	0.011989
10708	276.035	1	0	1	0	0	0	0.0120265
10710	276.068	1	0	1	0	0	0	0.0120475
10712	276.102	1	0	1	0	0	0	0.0120487
10714	276.135	1	0	1	0	0	0	0.0120311
10716	276.168	1	0	1	0	0	0	0.0120328
10718	276.202	1	0	1	0	0	0	0.0120402
10720	276.235	1	0	1	0	0	0	0.0120265
10722	276.268	1	0	1	0	0	0	0.012089
10724	276.302	1	0	1	0	0	0	0.0120731
10726	276.335	1	0	1	0	0	0	0.0120629
10728	276.368	1	0	1	0	0	0	0.0120685
10730	276.402	1	0	1	0	0	0	0.0120947
10732	276.435	1	0	1	0	0	0	0.0120566
10734	276.468	1	0	1	0	0	0	0.0121651
10736	276.502	1	0	1	0	0	0	0.01211
10738	276.535	1	0	1	0	0	0	0.0121441
10740	276.568	1	0	1	0	0	0	0.0121367
10742	276.602	1	0	1	0	0	0	0.0121305
10744	276.635	1	0	1	0	0	0	0.012114
10746	276.668	1	0	1	0	0	0	0.012139
10748	276.702	1	0	1	0	0	0	0.0120634
10750	276.735	1	0	1	0	0	0	0.0121242
10752	276.768	1	0	1	0	0	0	0.0120623
10754	276.802	1	0	1	0	0	0	0.0120964
10756	276.835	1	0	1	0	0	0	0.0120714
10758	276.868	1	0	1	0	0	0	0.0121043
10760	276.902	1	0	1	0	0	0	0.0120754
10762	276.935	1	0	1	0	0	0	0.012035
10764	276.968	1	0	1	0	0	0	0.0120918
10766	277.002	1	0	1	0	0	0	0.0120578
10768	277.035	1	0	1	0	0	0	0.0119942
10770	277.068	1	0	1	0	0	0	0.0120703
10772	277.102	1	0	1	0	0	0	0.0120765
10774	277.135	1	0	1	0	0	0	0.0120725
10776	277.168	1	0	1	0	0	0	0.0120833
10778	277.202	1	0	1	0	0	0	0.0120572
10780	277.235	1	0	1	0	0	0	0.0120021
10782	277.268	1	0	1	0	0	0	0.0120339
10784	277.302	1	0	1	0	0	0	0.0120555
10786	277.335	1	0	1	0	0	0	0.0120538
10788	277.368	1	0	1	0	0	0	0.0120447
10790	277.402	1	0	1	0	0	0	0.0120328
10792	277.435	1	0	1	0	0	0	0.0120521
10794	277.468	1	0	1	0	0	0	0.0120833
10796	277.502	1	0	1	0	0	0	0.0120492
10798	277.535	1	0	1	0	0	0	0.0120441
10800	277.568	1	0	1	0	0	0	0.0120595
10802	277.602	1	0	1	0	0	0	0.0120367
10804	277.635	1	0	1	0	0	0	0.0119885
10806	277.668	1	0	1	0	0	0	0.0120509
10808	277.702	1	0	1	0	0	0	0.012081
10810	277.735	1	0	1	0	0	0	0.0120663
10812	277.768	1	0	1	0	0	0	0.0121151
10814	277.802	1	0	1	0	0	0	0.0120487
10816	277.835	1	0	1	0	0	0	0.0121225
10818	277.868	1	0	1	0	0	0	0.0120884
10820	277.902	1	0	1	0	0	0	0.0120402
10822	277.935	1	0	1	0	0	0	0.0120407
10824	277.968	1	0	1	0	0	0	0.0121055
10826	278.002	1	0	1	0	0	0	0.0120742
10828	278.035	1	0	1	0	0	0	0.0120725
10830	278.068	1	0	1	0	0	0	0.0120271
10832	278.102	1	0	1	0	0	0	0.0120487
10834	278.135	1	0	1	0	0	0	0.0120384
10836	278.168	1	0	1	0	0	0	0.01211
10838	278.202	1	0	1	0	0	0	0.0120714
10840	278.235	1	0	1	0	0	0	0.0120299
10842	278.268	1	0	1	0	0	0	0.0120407
10844	278.302	1	0	1	0	0	0	0.0120759
10846	278.335	1	0	1	0	0	0	0.0120532
10848	278.368	1	0	1	0	0	0	0.0120464
10850	278.402	1	0	1	0	0	0	0.0120964
10852	278.435	1	0	1	0	0	0	0.0120668
10854	278.468	1	0	1	0	0	0	0.01211
10856	278.502	1	0	1	0	0	0	0.0120572
10858	278.535	1	0	1	0	0	0	0.0120856
10860	278.568	1	0	1	0	0	0	0.0120873
10862	278.602	1	0	1	0	0	0	0.0121185
10864	278.635	1	0	1	0	0	0	0.012139
10866	278.668	1	0	1	0	0	0	0.0120856
10868	278.702	1	0	1	0	0	0	0.0120737
10870	278.735	1	0	1	0	0	0	0.0121185
10872	278.768	1	0	1	0	0	0	0.0120492
10874	278.802	1	0	1	0	0	0	0.0120862
10876	278.835	1	0	1	0	0	0	0.0120663
10878	278.868	1	0	1	0	0	0	0.0120288
10880	278.902	1	0	1	0	0	0	0.0120952
10882	278.935	1	0	1	0	0	0	0.0120481
10884	278.968	1	0	1	0	0	0	0.0120225
10886	279.002	1	0	1	0	0	0	0.0120345
10888	279.035	1	0	1	0	0	0	0.0120481
10890	279.068	1	0	1	0	0	0	0.0119771
10892	279.102	1	0	1	0	0	0	0.0119856
10894	279.135	1	0	1	0	0	0	0.0119976
10896	279.168	1	0	1	0	0	0	0.0120629
10898	279.202	1	0	1	0	0	0	0.0120555
10900	279.235	1	0	1	0	0	0	0.0120776
10902	279.268	1	0	1	0	0	0	0.0120544
10904	279.302	1	0	1	0	0	0	0.0120146
10906	279.335	1	0	1	0	0	0	0.0120447
10908	279.368	1	0	1	0	0	0	0.0120424
10910	279.402	1	0	1	0	0	0	0.012047
10912	279.435	1	0	1	0	0	0	0.0120015
10914	279.468	1	0	1	0	0	0	0.0120038
10916	279.502	1	0	1	0	0	0	0.0120163
10918	279.535	1	0	1	0	0	0	0.0120322
10920	279.568	1	0	1	0	0	0	0.0119919
10922	279.602	1	0	1	0	0	0	0.0119913
10924	279.635	1	0	1	0	0	0	0.0119919
10926	279.668	1	0	1	0	0	0	0.0120913
10928	279.702	1	0	1	0	0	0	0.0120521
10930	279.735	1	0	1	0	0	0	0.0120674
10932	279.768	1	0	1	0	0	0	0.0119959
10934	279.802	1	0	1	0	0	0	0.0119589
10936	279.835	1	0	1	0	0	0	0.0120265
10938	279.868	1	0	1	0	0	0	0.0120237
10940	279.902	1	0	1	0	0	0	0.0120322
10942	279.935	1	0	1	0	0	0	0.0120152
10944	279.968	1	0	1	0	0	0	0.0119828
10946	280.002	1	0	1	0	0	0	0.0120805
10948	280.035	1	0	1	0	0	0	0.0120867
10950	280.068	1	0	1	0	0	0	0.0120833
10952	280.102	1	0	1	0	0	0	0.0120561
10954	280.135	1	0	1	0	0	0	0.0120578
10956	280.168	1	0	1	0	0	0	0.0120237
10958	280.202	1	0	1	0	0	0	0.0120998
10960	280.235	1	0	1	0	0	0	0.0120345
10962	280.268	1	0	1	0	0	0	0.0120816
10964	280.302	1	0	1	0	0	0	0.0119959
10966	280.335	1	0	1	0	0	0	0.0120328
10968	280.368	1	0	1	0	0	0	0.0121395
10970	280.402	1	0	1	0	0	0	0.0120606
10972	280.435	1	0	1	0	0	0	0.011997
10974	280.468	1	0	1	0	0	0	0.0120441
10976	280.502	1	0	1	0	0	0	0.0120464
10978	280.535	1	0	1	0	0	0	0.0120208
10980	280.568	1	0	1	0	0	0	0.0120782
10982	280.602	1	0	1	0	0	0	0.0120998
10984	280.635	1	0	1	0	0	0	0.0121452
10986	280.668	1	0	1	0	0	0	0.0120538
10988	280.702	1	0	1	0	0	0	0.0121481
10990	280.735	1	0	1	0	0	0	0.0121378
10992	280.768	1	0	1	0	0	0	0.0121009
10994	280.802	1	0	1	0	0	0	0.0120538
10996	280.835	1	0	1	0	0	0	0.0121174
10998	280.868	1	0	1	0	0	0	0.0121185
11000	280.902	1	0	1	0	0	0	0.0120254
11002	280.935	1	0	1	0	0	0	0.0120055
11004	280.968	1	0	1	0	0	0	0.0120101
11006	281.002	1	0	1	0	0	0	0.0120015
11008	281.035	1	0	1	0	0	0	0.0119993
11010	281.068	1	0	1	0	0	0	0.0120703
11012	281.102	1	0	1	0	0	0	0.0119714
11014	281.135	1	0	1	0	0	0	0.0120157
11016	281.168	1	0	1	0	0	0	0.0120879
11018	281.202	1	0	1	0	0	0	0.0120305
11020	281.235	1	0	1	0	0	0	0.0120901
11022	281.268	1	0	1	0	0	0	0.0120356
11024	281.302	1	0	1	0	0	0	0.0120487
11026	281.335	1	0	1	0	0	0	0.0120498
11028	281.368	1	0	1	0	0	0	0.0119606
11030	281.402	1	0	1	0	0	0	0.0119953
11032	281.435	1	0	1	0	0	0	0.0120578
11034	281.468	1	0	1	0	0	0	0.0120083
11036	281.502	1	0	1	0	0	0	0.0120305
11038	281.535	1	0	1	0	0	0	0.0119993
11040	281.568	1	0	1	0	0	0	0.0120595
11042	281.602	1	0	1	0	0	0	0.0120265
11044	281.635	1	0	1	0	0	0	0.0120776
11046	281.668	1	0	1	0	0	0	0.0120396
11048	281.702	1	0	1	0	0	0	0.0119589
11050	281.735	1	0	1	0	0	0	0.0120379
11052	281.768	1	0	1	0	0	0	0.0121015
11054	281.802	1	0	1	0	0	0	0.0120208
11056	281.835	1	0	1	0	0	0	0.0120583
11058	281.868	1	0	1	0	0	0	0.0120174
11060	281.902	1	0	1	0	0	0	0.0120498
11062	281.935	1	0	1	0	0	0	0.0120634
11064	281.968	1	0	1	0	0	0	0.0120805
11066	282.002	1	0	1	0	0	0	0.0120561
11068	282.035	1	0	1	0	0	0	0.0120322
11070	282.068	1	0	1	0	0	0	0.0119947
11072	282.102	1	0	1	0	0	0	0.0119981
11074	282.135	1	0	1	0	0	0	0.0120089
11076	282.168	1	0	1	0	0	0	0.0120214
11078	282.202	1	0	1	0	0	0	0.0120396
11080	282.235	1	0	1	0	0	0	0.0119805
11082	282.268	1	0	1	0	0	0	0.0120248
11084	282.302	1	0	1	0	0	0	0.0120299
11086	282.335	1	0	1	0	0	0	0.0119686
11088	282.368	1	0	1	0	0	0	0.0120106
11090	282.402	1	0	1	0	0	0	0.0120311
11092	282.435	1	0	1	0	0	0	0.0119942
11094	282.468	1	0	1	0	0	0	0.0119845
11096	282.501	1	0	1	0	0	0	0.0119135
11098	282.535	1	0	1	0	0	0	0.0119817
11100	282.568	1	0	1	0	0	0	0.0119504
11102	282.601	1	0	1	0	0	0	0.0119692
11104	282.635	1	0	1	0	0	0	0.0120021
11106	282.668	1	0	1	0	0	0	0.011968
11108	282.701	1	0	1	0	0	0	0.012035
11110	282.735	1	0	1	0	0	0	0.0119839
11112	282.768	1	0	1	0	0	0	0.0120208
11114	282.801	1	0	1	0	0	0	0.0120725
11116	282.835	1	0	1	0	0	0	0.0120243
11118	282.868	1	0	1	0	0	0	0.0120356
11120	282.901	1	0	1	0	0	0	0.0120038
11122	282.935	1	0	1	0	0	0	0.0119669
11124	282.968	1	0	1	0	0	0	0.0120027
11126	283.001	1	0	1	0	0	0	0.0119538
11128	283.035	1	0	1	0	0	0	0.0120214
11130	283.068	1	0	1	0	0	0	0.0120504
11132	283.101	1	0	1	0	0	0	0.0119811
11134	283.135	1	0	1	0	0	0	0.0120458
11136	283.168	1	0	1	0	0	0	0.0120742
11138	283.201	1	0	1	0	0	0	0.0120237
11140	283.235	1	0	1	0	0	0	0.0120248
11142	283.268	1	0	1	0	0	0	0.0120765
11144	283.301	1	0	1	0	0	0	0.0120225
11146	283.335	1	0	1	0	0	0	0.0119709
11148	283.368	1	0	1	0	0	0	0.0119765
11150	283.401	1	0	1	0	0	0	0.0120163
11152	283.435	1	0	1	0	0	0	0.0119868
11154	283.468	1	0	1	0	0	0	0.0120572
11156	283.501	1	0	1	0	0	0	0.0120572
11158	283.535	1	0	1	0	0	0	0.0120566
11160	283.568	1	0	1	0	0	0	0.0119817
11162	283.601	1	0	1	0	0	0	0.0120481
11164	283.635	1	0	1	0	0	0	0.0120299
11166	283.668	1	0	1	0	0	0	0.0120152
11168	283.701	1	0	1	0	0	0	0.0119737
11170	283.735	1	0	1	0	0	0	0.0119635
11172	283.768	1	0	1	0	0	0	0.0120095
11174	283.801	1	0	1	0	0	0	0.0120322
11176	283.835	1	0	1	0	0	0	0.0120271
11178	283.868	1	0	1	0	0	0	0.0120157
11180	283.901	1	0	1	0	0	0	0.0120316
11182	283.935	1	0	1	0	0	0	0.0119675
11184	283.968	1	0	1	0	0	0	0.0119896
11186	284.001	1	0	1	0	0	0	0.0119601
11188	284.035	1	0	1	0	0	0	0.0120169
11190	284.068	1	0	1	0	0	0	0.0119357
11192	284.101	1	0	1	0	0	0	0.0120288
11194	284.135	1	0	1	0	0	0	0.0119805
11196	284.168	1	0	1	0	0	0	0.0120907
11198	284.201	1	0	1	0	0	0	0.0120441
11200	284.235	1	0	1	0	0	0	0.0119981
11202	284.268	1	0	1	0	0	0	0.0119754
11204	284.301	1	0	1	0	0	0	0.0119487
11206	284.335	1	0	1	0	0	0	0.0120203
11208	284.368	1	0	1	0	0	0	0.0120453
11210	284.401	1	0	1	0	0	0	0.0120271
11212	284.435	1	0	1	0	0	0	0.0121015
11214	284.468	1	0	1	0	0	0	0.0120447
11216	284.501	1	0	1	0	0	0	0.0120169
11218	284.535	1	0	1	0	0	0	0.0119947
11220	284.568	1	0	1	0	0	0	0.0120492
11222	284.601	1	0	1	0	0	0	0.0119544
11224	284.635	1	0	1	0	0	0	0.011993
11226	284.668	1	0	1	0	0	0	0.0119232
11228	284.701	1	0	1	0	0	0	0.0119947
11230	284.735	1	0	1	0	0	0	0.0120203
11232	284.768	1	0	1	0	0	0	0.0120578
11234	284.801	1	0	1	0	0	0	0.011989
11236	284.835	1	0	1	0	0	0	0.0120481
11238	284.868	1	0	1	0	0	0	0.0119527
11240	284.901	1	0	1	0	0	0	0.0119885
11242	284.935	1	0	1	0	0	0	0.0119714
11244	284.968	1	0	1	0	0	0	0.0119714
11246	285.001	1	0	1	0	0	0	0.0119504
11248	285.035	1	0	1	0	0	0	0.0119686
11250	285.068	1	0	1	0	0	0	0.0120135
11252	285.101	1	0	1	0	0	0	0.0119805
11254	285.135	1	0	1	0	0	0	0.0119936
11256	285.168	1	0	1	0	0	0	0.0119726
11258	285.201	1	0	1	0	0	0	0.0119822
11260	285.235	1	0	1	0	0	0	0.0119618
11262	285.268	1	0	1	0	0	0	0.0119658
11264	285.301	1	0	1	0	0	0	0.0119584
11266	285.335	1	0	1	0	0	0	0.0119328
11268	285.368	1	0	1	0	0	0	0.0119533
11270	285.401	1	0	1	0	0	0	0.0119907
11272	285.435	1	0	1	0	0	0	0.0119646
11274	285.468	1	0	1	0	0	0	0.0120464
11276	285.501	1	0	1	0	0	0	0.0120044
11278	285.535	1	0	1	0	0	0	0.011964
11280	285.568	1	0	1	0	0	0	0.0120157
11282	285.601	1	0	1	0	0	0	0.0119748
11284	285.635	1	0	1	0	0	0	0.0120129
11286	285.668	1	0	1	0	0	0	0.0119947
11288	285.701	1	0	1	0	0	0	0.011964
11290	285.735	1	0	1	0	0	0	0.0120129
11292	285.768	1	0	1	0	0	0	0.0120169
11294	285.801	1	0	1	0	0	0	0.011918
11296	285.835	1	0	1	0	0	0	0.0120214
11298	285.868	1	0	1	0	0	0	0.0120089
11300	285.901	1	0	1	0	0	0	0.0119998
11302	285.935	1	0	1	0	0	0	0.0120646
11304	285.968	1	0	1	0	0	0	0.012001
11306	286.001	1	0	1	0	0	0	0.0120532
11308	286.035	1	0	1	0	0	0	0.0120243
11310	286.068	1	0	1	0	0	0	0.011976
11312	286.101	1	0	1	0	0	0	0.0119913
11314	286.135	1	0	1	0	0	0	0.0119726
11316	286.168	1	0	1	0	0	0	0.0120356
11318	286.201	1	0	1	0	0	0	0.0120078
11320	286.235	1	0	1	0	0	0	0.0119748
11322	286.268	1	0	1	0	0	0	0.0119555
11324	286.301	1	0	1	0	0	0	0.0119538
11326	286.335	1	0	1	0	0	0	0.012022
11328	286.368	1	0	1	0	0	0	0.012014
11330	286.401	1	0	1	0	0	0	0.0120123
11332	286.435	1	0	1	0	0	0	0.0119817
11334	286.468	1	0	1	0	0	0	0.0120095
11336	286.501	1	0	1	0	0	0	0.0119993
11338	286.535	1	0	1	0	0	0	0.0119595
11340	286.568	1	0	1	0	0	0	0.0120186
11342	286.601	1	0	1	0	0	0	0.011968
11344	286.635	1	0	1	0	0	0	0.0119703
11346	286.668	1	0	1	0	0	0	0.0120044
11348	286.701	1	0	1	0	0	0	0.0119913
11350	286.735	1	0	1	0	0	0	0.011964
11352	286.768	1	0	1	0	0	0	0.0119726
11354	286.801	1	0	1	0	0	0	0.0120436
11356	286.835	1	0	1	0	0	0	0.0120402
11358	286.868	1	0	1	0	0	0	0.0120146
11360	286.901	1	0	1	0	0	0	0.0119942
11362	286.935	1	0	1	0	0	0	0.0119737
11364	286.968	1	0	1	0	0	0	0.012018
11366	287.001	1	0	1	0	0	0	0.01198
11368	287.035	1	0	1	0	0	0	0.0119879
11370	287.068	1	0	1	0	0	0	0.0120004
11372	287.101	1	0	1	0	0	0	0.0119828
11374	287.135	1	0	1	0	0	0	0.0120044
11376	287.168	1	0	1	0	0	0	0.0120606
11378	287.201	1	0	1	0	0	0	0.0120146
11380	287.235	1	0	1	0	0	0	0.0119976
11382	287.268	1	0	1	0	0	0	0.0120061
11384	287.301	1	0	1	0	0	0	0.0119663
11386	287.335	1	0	1	0	0	0	0.0119907
11388	287.368	1	0	1	0	0	0	0.0120089
11390	287.401	1	0	1	0	0	0	0.0120032
11392	287.435	1	0	1	0	0	0	0.0120254
11394	287.468	1	0	1	0	0	0	0.0119771
11396	287.501	1	0	1	0	0	0	0.0120379
11398	287.535	1	0	1	0	0	0	0.0120174
11400	287.568	1	0	1	0	0	0	0.0120384
11402	287.601	1	0	1	0	0	0	0.0120509
11404	287.635	1	0	1	0	0	0	0.0119879
11406	287.668	1	0	1	0	0	0	0.0120975
11408	287.701	1	0	1	0	0	0	0.0120186
11410	287.735	1	0	1	0	0	0	0.0120549
11412	287.768	1	0	1	0	0	0	0.0120566
11414	287.801	1	0	1	0	0	0	0.0120367
11416	287.835	1	0	1	0	0	0	0.0119907
11418	287.868	1	0	1	0	0	0	0.0119964
11420	287.901	1	0	1	0	0	0	0.0120356
11422	287.935	1	0	1	0	0	0	0.0120322
11424	287.968	1	0	1	0	0	0	0.0119567
11426	288.001	1	0	1	0	0	0	0.0120646
11428	288.035	1	0	1	0	0	0	0.0119924
11430	288.068	1	0	1	0	0	0	0.0119675
11432	288.101	1	0	1	0	0	0	0.0120839
[truncated: 25,160 more rows]

## Sheet: Mouse_2_470_Signal
FrameCounter	Timestamp	LedState	Stimulation	Output0	Output1	Input0	Input1	Region0G
7435	221.487	2	0	1	0	0	0	0.0157612
7437	221.521	2	0	1	0	0	0	0.0157397
7439	221.554	2	0	1	0	0	0	0.0157005
7441	221.587	2	0	1	0	0	0	0.0157397
7443	221.621	2	0	1	0	0	0	0.0157771
7445	221.654	2	0	1	0	0	0	0.0157192
7447	221.687	2	0	1	0	0	0	0.0157766
7449	221.721	2	0	1	0	0	0	0.0157465
7451	221.754	2	0	1	0	0	0	0.0157601
7453	221.787	2	0	1	0	0	0	0.0158254
7455	221.821	2	0	1	0	0	0	0.0158061
7457	221.854	2	0	1	0	0	0	0.0158021
7459	221.887	2	0	1	0	0	0	0.0157902
7461	221.921	2	0	1	0	0	0	0.0157874
7463	221.954	2	0	1	0	0	0	0.0158089
7465	221.987	2	0	1	0	0	0	0.0158726
7467	222.021	2	0	1	0	0	0	0.0158192
7469	222.054	2	0	1	0	0	0	0.0158493
7471	222.087	2	0	1	0	0	0	0.0159106
7473	222.121	2	0	1	0	0	0	0.0158811
7475	222.154	2	0	1	0	0	0	0.0159032
7477	222.187	2	0	1	0	0	0	0.0158703
7479	222.221	2	0	1	0	0	0	0.0159475
7481	222.254	2	0	1	0	0	0	0.0159197
7483	222.287	2	0	1	0	0	0	0.015964
7485	222.321	2	0	1	0	0	0	0.0159549
7487	222.354	2	0	1	0	0	0	0.0160009
7489	222.387	2	0	1	0	0	0	0.0160179
7491	222.421	2	0	1	0	0	0	0.0159901
7493	222.454	2	0	1	0	0	0	0.0160094
7495	222.487	2	0	1	0	0	0	0.0160759
7497	222.521	2	0	1	0	0	0	0.016106
7499	222.554	2	0	1	0	0	0	0.0161156
7501	222.587	2	0	1	0	0	0	0.0161338
7503	222.621	2	0	1	0	0	0	0.0161287
7505	222.654	2	0	1	0	0	0	0.0161548
7507	222.687	2	0	1	0	0	0	0.0161241
7509	222.721	2	0	1	0	0	0	0.0161565
7511	222.754	2	0	1	0	0	0	0.0161037
7513	222.787	2	0	1	0	0	0	0.0160639
7515	222.821	2	0	1	0	0	0	0.0160747
7517	222.854	2	0	1	0	0	0	0.0160708
7519	222.887	2	0	1	0	0	0	0.0160674
7521	222.921	2	0	1	0	0	0	0.0160458
7523	222.954	2	0	1	0	0	0	0.0160435
7525	222.987	2	0	1	0	0	0	0.0160106
7527	223.021	2	0	1	0	0	0	0.0159861
7529	223.054	2	0	1	0	0	0	0.0159827
7531	223.087	2	0	1	0	0	0	0.0159788
7533	223.121	2	0	1	0	0	0	0.0159765
7535	223.154	2	0	1	0	0	0	0.0159594
7537	223.187	2	0	1	0	0	0	0.0159254
7539	223.221	2	0	1	0	0	0	0.0160628
7541	223.254	2	0	1	0	0	0	0.0161832
7543	223.287	2	0	1	0	0	0	0.0161525
7545	223.321	2	0	1	0	0	0	0.0161525
7547	223.354	2	0	1	0	0	0	0.0161554
7549	223.387	2	0	1	0	0	0	0.0160713
7551	223.421	2	0	1	0	0	0	0.0162349
7553	223.454	2	0	1	0	0	0	0.0163604
7555	223.487	2	0	1	0	0	0	0.0164098
7557	223.521	2	0	1	0	0	0	0.0165018
7559	223.554	2	0	1	0	0	0	0.0167046
7561	223.587	2	0	1	0	0	0	0.0167989
7563	223.621	2	0	1	0	0	0	0.0169346
7565	223.654	2	0	1	0	0	0	0.0170061
7567	223.687	2	0	1	0	0	0	0.017143
7569	223.721	2	0	1	0	0	0	0.0171402
7571	223.754	2	0	1	0	0	0	0.0171737
7573	223.787	2	0	1	0	0	0	0.0171334
7575	223.821	2	0	1	0	0	0	0.0172248
7577	223.854	2	0	1	0	0	0	0.0172498
7579	223.887	2	0	1	0	0	0	0.0172668
7581	223.921	2	0	1	0	0	0	0.0173412
7583	223.954	2	0	1	0	0	0	0.0173515
7585	223.987	2	0	1	0	0	0	0.0173668
7587	224.021	2	0	1	0	0	0	0.0174207
7589	224.054	2	0	1	0	0	0	0.0174065
7591	224.087	2	0	1	0	0	0	0.0174446
7593	224.12	2	0	1	0	0	0	0.0175201
7595	224.154	2	0	1	0	0	0	0.0174463
7597	224.187	2	0	1	0	0	0	0.0174253
7599	224.22	2	0	1	0	0	0	0.0174577
7601	224.254	2	0	1	0	0	0	0.0174043
7603	224.287	2	0	1	0	0	0	0.0174968
7605	224.32	2	0	1	0	0	0	0.0174821
7607	224.354	2	0	1	0	0	0	0.0173969
7609	224.387	2	0	1	0	0	0	0.0173515
7611	224.42	2	0	1	0	0	0	0.0174065
7613	224.454	2	0	1	0	0	0	0.017377
7615	224.487	2	0	1	0	0	0	0.0173497
7617	224.52	2	0	1	0	0	0	0.017385
7619	224.554	2	0	1	0	0	0	0.0172634
7621	224.587	2	0	1	0	0	0	0.0172475
7623	224.62	2	0	1	0	0	0	0.0172873
7625	224.654	2	0	1	0	0	0	0.0172498
7627	224.687	2	0	1	0	0	0	0.0172322
7629	224.72	2	0	1	0	0	0	0.0172736
7631	224.754	2	0	1	0	0	0	0.017222
7633	224.787	2	0	1	0	0	0	0.0172021
7635	224.82	2	0	1	0	0	0	0.0171856
7637	224.854	2	0	1	0	0	0	0.0170811
7639	224.887	2	0	1	0	0	0	0.017059
7641	224.92	2	0	1	0	0	0	0.0171089
7643	224.954	2	0	1	0	0	0	0.0171067
7645	224.987	2	0	1	0	0	0	0.0170794
7647	225.02	2	0	1	0	0	0	0.0170658
7649	225.054	2	0	1	0	0	0	0.017084
7651	225.087	2	0	1	0	0	0	0.0170522
7653	225.12	2	0	1	0	0	0	0.0169658
7655	225.154	2	0	1	0	0	0	0.0169584
7657	225.187	2	0	1	0	0	0	0.0169374
7659	225.22	2	0	1	0	0	0	0.0169499
7661	225.254	2	0	1	0	0	0	0.0169732
7663	225.287	2	0	1	0	0	0	0.0169726
7665	225.32	2	0	1	0	0	0	0.0169749
7667	225.354	2	0	1	0	0	0	0.0169482
7669	225.387	2	0	1	0	0	0	0.0169176
7671	225.42	2	0	1	0	0	0	0.0169829
7673	225.454	2	0	1	0	0	0	0.0169295
7675	225.487	2	0	1	0	0	0	0.0170039
7677	225.52	2	0	1	0	0	0	0.0169863
7679	225.554	2	0	1	0	0	0	0.0169522
7681	225.587	2	0	1	0	0	0	0.0170079
7683	225.62	2	0	1	0	0	0	0.0169755
7685	225.654	2	0	1	0	0	0	0.0169607
7687	225.687	2	0	1	0	0	0	0.0170493
7689	225.72	2	0	1	0	0	0	0.0169653
7691	225.754	2	0	1	0	0	0	0.01698
7693	225.787	2	0	1	0	0	0	0.0169187
7695	225.82	2	0	1	0	0	0	0.017005
7697	225.854	2	0	1	0	0	0	0.0170584
7699	225.887	2	0	1	0	0	0	0.0170578
7701	225.92	2	0	1	0	0	0	0.017038
7703	225.954	2	0	1	0	0	0	0.0170056
7705	225.987	2	0	1	0	0	0	0.0170663
7707	226.02	2	0	1	0	0	0	0.0170283
7709	226.054	2	0	1	0	0	0	0.0170487
7711	226.087	2	0	1	0	0	0	0.0169937
7713	226.12	2	0	1	0	0	0	0.0170005
7715	226.154	2	0	1	0	0	0	0.0170272
7717	226.187	2	0	1	0	0	0	0.0170249
7719	226.22	2	0	1	0	0	0	0.0170788
7721	226.254	2	0	1	0	0	0	0.0170124
7723	226.287	2	0	1	0	0	0	0.0169772
7725	226.32	2	0	1	0	0	0	0.0169556
7727	226.354	2	0	1	0	0	0	0.0169204
7729	226.387	2	0	1	0	0	0	0.017009
7731	226.42	2	0	1	0	0	0	0.016967
7733	226.454	2	0	1	0	0	0	0.0169692
7735	226.487	2	0	1	0	0	0	0.0169698
7737	226.52	2	0	1	0	0	0	0.0169352
7739	226.554	2	0	1	0	0	0	0.0169584
7741	226.587	2	0	1	0	0	0	0.0168715
7743	226.62	2	0	1	0	0	0	0.0168573
7745	226.654	2	0	1	0	0	0	0.0167915
7747	226.687	2	0	1	0	0	0	0.0168369
7749	226.72	2	0	1	0	0	0	0.0168545
7751	226.754	2	0	1	0	0	0	0.016875
7753	226.787	2	0	1	0	0	0	0.0168613
7755	226.82	2	0	1	0	0	0	0.0168596
7757	226.854	2	0	1	0	0	0	0.0168801
7759	226.887	2	0	1	0	0	0	0.0168545
7761	226.92	2	0	1	0	0	0	0.0168539
7763	226.954	2	0	1	0	0	0	0.0168591
7765	226.987	2	0	1	0	0	0	0.0168591
7767	227.02	2	0	1	0	0	0	0.0169016
7769	227.054	2	0	1	0	0	0	0.0169227
7771	227.087	2	0	1	0	0	0	0.0169102
7773	227.12	2	0	1	0	0	0	0.0168727
7775	227.154	2	0	1	0	0	0	0.0169227
7777	227.187	2	0	1	0	0	0	0.0168625
7779	227.22	2	0	1	0	0	0	0.0168375
7781	227.254	2	0	1	0	0	0	0.0168823
7783	227.287	2	0	1	0	0	0	0.0168733
7785	227.32	2	0	1	0	0	0	0.0168846
7787	227.354	2	0	1	0	0	0	0.0169005
7789	227.387	2	0	1	0	0	0	0.01693
7791	227.42	2	0	1	0	0	0	0.0168869
7793	227.454	2	0	1	0	0	0	0.0169136
7795	227.487	2	0	1	0	0	0	0.0169113
7797	227.52	2	0	1	0	0	0	0.016892
7799	227.554	2	0	1	0	0	0	0.0168965
7801	227.587	2	0	1	0	0	0	0.0168823
7803	227.62	2	0	1	0	0	0	0.016875
7805	227.654	2	0	1	0	0	0	0.0168522
7807	227.687	2	0	1	0	0	0	0.016871
7809	227.72	2	0	1	0	0	0	0.0168255
7811	227.754	2	0	1	0	0	0	0.0168466
7813	227.787	2	0	1	0	0	0	0.0168903
7815	227.82	2	0	1	0	0	0	0.0168869
7817	227.854	2	0	1	0	0	0	0.0168187
7819	227.887	2	0	1	0	0	0	0.0168284
7821	227.92	2	0	1	0	0	0	0.0168193
7823	227.954	2	0	1	0	0	0	0.0169016
7825	227.987	2	0	1	0	0	0	0.0169715
7827	228.02	2	0	1	0	0	0	0.0169732
7829	228.054	2	0	1	0	0	0	0.016963
7831	228.087	2	0	1	0	0	0	0.0170084
7833	228.12	2	0	1	0	0	0	0.0170828
7835	228.154	2	0	1	0	0	0	0.0170368
7837	228.187	2	0	1	0	0	0	0.0170607
7839	228.22	2	0	1	0	0	0	0.0169982
7841	228.254	2	0	1	0	0	0	0.0169795
7843	228.287	2	0	1	0	0	0	0.0169562
7845	228.32	2	0	1	0	0	0	0.0169993
7847	228.354	2	0	1	0	0	0	0.0168892
7849	228.387	2	0	1	0	0	0	0.0169107
7851	228.42	2	0	1	0	0	0	0.0169238
7853	228.454	2	0	1	0	0	0	0.0169494
7855	228.487	2	0	1	0	0	0	0.0169113
7857	228.52	2	0	1	0	0	0	0.0169227
7859	228.554	2	0	1	0	0	0	0.0169255
7861	228.587	2	0	1	0	0	0	0.0169329
7863	228.62	2	0	1	0	0	0	0.0169068
7865	228.654	2	0	1	0	0	0	0.0169068
7867	228.687	2	0	1	0	0	0	0.016875
7869	228.72	2	0	1	0	0	0	0.0169153
7871	228.754	2	0	1	0	0	0	0.0169641
7873	228.787	2	0	1	0	0	0	0.0169834
7875	228.82	2	0	1	0	0	0	0.0169567
7877	228.854	2	0	1	0	0	0	0.0169954
7879	228.887	2	0	1	0	0	0	0.0170459
7881	228.92	2	0	1	0	0	0	0.0170669
7883	228.954	2	0	1	0	0	0	0.0170913
7885	228.987	2	0	1	0	0	0	0.0171038
7887	229.02	2	0	1	0	0	0	0.017047
7889	229.054	2	0	1	0	0	0	0.0170692
7891	229.087	2	0	1	0	0	0	0.0169806
7893	229.12	2	0	1	0	0	0	0.0170351
7895	229.154	2	0	1	0	0	0	0.0170147
7897	229.187	2	0	1	0	0	0	0.0168284
7899	229.22	2	0	1	0	0	0	0.0168471
7901	229.254	2	0	1	0	0	0	0.0168869
7903	229.287	2	0	1	0	0	0	0.0168829
7905	229.32	2	0	1	0	0	0	0.0168977
7907	229.354	2	0	1	0	0	0	0.0168693
7909	229.387	2	0	1	0	0	0	0.0168704
7911	229.42	2	0	1	0	0	0	0.0168659
7913	229.454	2	0	1	0	0	0	0.0169016
7915	229.487	2	0	1	0	0	0	0.0168528
7917	229.52	2	0	1	0	0	0	0.0168784
7919	229.554	2	0	1	0	0	0	0.0168613
7921	229.587	2	0	1	0	0	0	0.0169687
7923	229.62	2	0	1	0	0	0	0.0169124
7925	229.654	2	0	1	0	0	0	0.0168647
7927	229.687	2	0	1	0	0	0	0.0170073
7929	229.72	2	0	1	0	0	0	0.0170419
7931	229.754	2	0	1	0	0	0	0.0169925
7933	229.787	2	0	1	0	0	0	0.016913
7935	229.82	2	0	1	0	0	0	0.0169391
7937	229.854	2	0	1	0	0	0	0.0170016
7939	229.887	2	0	1	0	0	0	0.0170272
7941	229.92	2	0	1	0	0	0	0.0170317
7943	229.954	2	0	1	0	0	0	0.0170925
7945	229.987	2	0	1	0	0	0	0.0169641
7947	230.02	2	0	1	0	0	0	0.0170113
7949	230.054	2	0	1	0	0	0	0.0170079
7951	230.087	2	0	1	0	0	0	0.0170056
7953	230.12	2	0	1	0	0	0	0.0169834
7955	230.154	2	0	1	0	0	0	0.0168625
7957	230.187	2	0	1	0	0	0	0.0169778
7959	230.22	2	0	1	0	0	0	0.0169437
7961	230.254	2	0	1	0	0	0	0.016976
7963	230.287	2	0	1	0	0	0	0.0169704
7965	230.32	2	0	1	0	0	0	0.0168795
7967	230.354	2	0	1	0	0	0	0.0168977
7969	230.387	2	0	1	0	0	0	0.0168562
7971	230.42	2	0	1	0	0	0	0.0167881
7973	230.454	2	0	1	0	0	0	0.0168471
7975	230.487	2	0	1	0	0	0	0.0168324
7977	230.52	2	0	1	0	0	0	0.0168897
7979	230.554	2	0	1	0	0	0	0.016796
7981	230.587	2	0	1	0	0	0	0.0168233
7983	230.62	2	0	1	0	0	0	0.0169068
7985	230.654	2	0	1	0	0	0	0.0168272
7987	230.687	2	0	1	0	0	0	0.0168221
7989	230.72	2	0	1	0	0	0	0.0168727
7991	230.754	2	0	1	0	0	0	0.016838
7993	230.787	2	0	1	0	0	0	0.0167352
7995	230.82	2	0	1	0	0	0	0.0167886
7997	230.854	2	0	1	0	0	0	0.0167756
7999	230.887	2	0	1	0	0	0	0.0167284
8001	230.92	2	0	1	0	0	0	0.0166665
8003	230.954	2	0	1	0	0	0	0.0166807
8005	230.987	2	0	1	0	0	0	0.0166915
8007	231.02	2	0	1	0	0	0	0.0167619
8009	231.054	2	0	1	0	0	0	0.0167199
8011	231.087	2	0	1	0	0	0	0.0167165
8013	231.12	2	0	1	0	0	0	0.0167012
8015	231.154	2	0	1	0	0	0	0.0167063
8017	231.187	2	0	1	0	0	0	0.0167142
8019	231.22	2	0	1	0	0	0	0.0166995
8021	231.254	2	0	1	0	0	0	0.0167137
8023	231.287	2	0	1	0	0	0	0.0165864
8025	231.32	2	0	1	0	0	0	0.0165717
8027	231.354	2	0	1	0	0	0	0.0166625
8029	231.387	2	0	1	0	0	0	0.0167227
8031	231.42	2	0	1	0	0	0	0.0167392
8033	231.454	2	0	1	0	0	0	0.0167739
8035	231.487	2	0	1	0	0	0	0.0167705
8037	231.52	2	0	1	0	0	0	0.0168221
8039	231.554	2	0	1	0	0	0	0.0168443
8041	231.587	2	0	1	0	0	0	0.0168608
8043	231.62	2	0	1	0	0	0	0.0168795
8045	231.654	2	0	1	0	0	0	0.0168596
8047	231.687	2	0	1	0	0	0	0.0168909
8049	231.72	2	0	1	0	0	0	0.0168999
8051	231.754	2	0	1	0	0	0	0.0168585
8053	231.787	2	0	1	0	0	0	0.0168721
8055	231.82	2	0	1	0	0	0	0.0168176
8057	231.854	2	0	1	0	0	0	0.0168687
8059	231.887	2	0	1	0	0	0	0.0168307
8061	231.92	2	0	1	0	0	0	0.0167756
8063	231.954	2	0	1	0	0	0	0.0167937
8065	231.987	2	0	1	0	0	0	0.0168148
8067	232.02	2	0	1	0	0	0	0.0166932
8069	232.054	2	0	1	0	0	0	0.0166733
8071	232.087	2	0	1	0	0	0	0.0166909
8073	232.12	2	0	1	0	0	0	0.0167165
8075	232.154	2	0	1	0	0	0	0.0166944
8077	232.187	2	0	1	0	0	0	0.0166909
8079	232.22	2	0	1	0	0	0	0.0166563
8081	232.254	2	0	1	0	0	0	0.0166688
8083	232.287	2	0	1	0	0	0	0.0166796
8085	232.32	2	0	1	0	0	0	0.0166875
8087	232.354	2	0	1	0	0	0	0.0167949
8089	232.387	2	0	1	0	0	0	0.0168017
8091	232.42	2	0	1	0	0	0	0.0168698
8093	232.454	2	0	1	0	0	0	0.0168801
8095	232.487	2	0	1	0	0	0	0.0168591
8097	232.52	2	0	1	0	0	0	0.0168789
8099	232.553	2	0	1	0	0	0	0.0169272
8101	232.587	2	0	1	0	0	0	0.016892
8103	232.62	2	0	1	0	0	0	0.0169596
8105	232.653	2	0	1	0	0	0	0.0169085
8107	232.687	2	0	1	0	0	0	0.0169704
8109	232.72	2	0	1	0	0	0	0.0169193
8111	232.753	2	0	1	0	0	0	0.0169119
8113	232.787	2	0	1	0	0	0	0.0168636
8115	232.82	2	0	1	0	0	0	0.0168636
8117	232.853	2	0	1	0	0	0	0.0168681
8119	232.887	2	0	1	0	0	0	0.0168789
8121	232.92	2	0	1	0	0	0	0.016884
8123	232.953	2	0	1	0	0	0	0.0168625
8125	232.987	2	0	1	0	0	0	0.0168199
8127	233.02	2	0	1	0	0	0	0.0168028
8129	233.053	2	0	1	0	0	0	0.0167682
8131	233.087	2	0	1	0	0	0	0.0167404
8133	233.12	2	0	1	0	0	0	0.0167137
8135	233.153	2	0	1	0	0	0	0.0166796
8137	233.187	2	0	1	0	0	0	0.0166892
8139	233.22	2	0	1	0	0	0	0.0166682
8141	233.253	2	0	1	0	0	0	0.0167398
8143	233.287	2	0	1	0	0	0	0.0166347
8145	233.32	2	0	1	0	0	0	0.0166432
8147	233.353	2	0	1	0	0	0	0.0166058
8149	233.387	2	0	1	0	0	0	0.0165842
8151	233.42	2	0	1	0	0	0	0.0166767
8153	233.453	2	0	1	0	0	0	0.0166733
8155	233.487	2	0	1	0	0	0	0.0166455
8157	233.52	2	0	1	0	0	0	0.0166415
8159	233.553	2	0	1	0	0	0	0.0166711
8161	233.587	2	0	1	0	0	0	0.0166728
8163	233.62	2	0	1	0	0	0	0.0167148
8165	233.653	2	0	1	0	0	0	0.0167114
8167	233.687	2	0	1	0	0	0	0.016679
8169	233.72	2	0	1	0	0	0	0.0166688
8171	233.753	2	0	1	0	0	0	0.0166944
8173	233.787	2	0	1	0	0	0	0.0166671
8175	233.82	2	0	1	0	0	0	0.0166262
8177	233.853	2	0	1	0	0	0	0.0166614
8179	233.887	2	0	1	0	0	0	0.0166926
8181	233.92	2	0	1	0	0	0	0.016612
8183	233.953	2	0	1	0	0	0	0.0166773
8185	233.987	2	0	1	0	0	0	0.0166921
8187	234.02	2	0	1	0	0	0	0.0166779
8189	234.053	2	0	1	0	0	0	0.0166194
8191	234.087	2	0	1	0	0	0	0.0166989
8193	234.12	2	0	1	0	0	0	0.0167256
8195	234.153	2	0	1	0	0	0	0.0167699
8197	234.187	2	0	1	0	0	0	0.0166217
8199	234.22	2	0	1	0	0	0	0.0165762
8201	234.253	2	0	1	0	0	0	0.016587
8203	234.287	2	0	1	0	0	0	0.016541
8205	234.32	2	0	1	0	0	0	0.0166035
8207	234.353	2	0	1	0	0	0	0.0165813
8209	234.387	2	0	1	0	0	0	0.016633
8211	234.42	2	0	1	0	0	0	0.0165467
8213	234.453	2	0	1	0	0	0	0.016633
8215	234.487	2	0	1	0	0	0	0.0166131
8217	234.52	2	0	1	0	0	0	0.0166705
8219	234.553	2	0	1	0	0	0	0.0166154
8221	234.587	2	0	1	0	0	0	0.0165609
8223	234.62	2	0	1	0	0	0	0.0166682
8225	234.653	2	0	1	0	0	0	0.0166188
8227	234.687	2	0	1	0	0	0	0.0166001
8229	234.72	2	0	1	0	0	0	0.0166256
8231	234.753	2	0	1	0	0	0	0.0166165
8233	234.787	2	0	1	0	0	0	0.0165808
8235	234.82	2	0	1	0	0	0	0.0166296
8237	234.853	2	0	1	0	0	0	0.0166461
8239	234.887	2	0	1	0	0	0	0.0165853
8241	234.92	2	0	1	0	0	0	0.0165228
8243	234.953	2	0	1	0	0	0	0.0165149
8245	234.987	2	0	1	0	0	0	0.016541
8247	235.02	2	0	1	0	0	0	0.0165768
8249	235.053	2	0	1	0	0	0	0.0165728
8251	235.087	2	0	1	0	0	0	0.0165518
8253	235.12	2	0	1	0	0	0	0.0165478
8255	235.153	2	0	1	0	0	0	0.0166205
8257	235.187	2	0	1	0	0	0	0.0166302
8259	235.22	2	0	1	0	0	0	0.0166347
8261	235.253	2	0	1	0	0	0	0.016658
8263	235.287	2	0	1	0	0	0	0.0166137
8265	235.32	2	0	1	0	0	0	0.0166421
8267	235.353	2	0	1	0	0	0	0.0166194
8269	235.387	2	0	1	0	0	0	0.0165921
8271	235.42	2	0	1	0	0	0	0.0166228
8273	235.453	2	0	1	0	0	0	0.0166858
8275	235.487	2	0	1	0	0	0	0.0166296
8277	235.52	2	0	1	0	0	0	0.0165802
8279	235.553	2	0	1	0	0	0	0.0165677
8281	235.587	2	0	1	0	0	0	0.0165223
8283	235.62	2	0	1	0	0	0	0.0165473
8285	235.653	2	0	1	0	0	0	0.0165279
8287	235.687	2	0	1	0	0	0	0.0165393
8289	235.72	2	0	1	0	0	0	0.0165683
8291	235.753	2	0	1	0	0	0	0.0165075
8293	235.787	2	0	1	0	0	0	0.0165081
8295	235.82	2	0	1	0	0	0	0.0165262
8297	235.853	2	0	1	0	0	0	0.0165353
8299	235.887	2	0	1	0	0	0	0.0165842
8301	235.92	2	0	1	0	0	0	0.0166188
8303	235.953	2	0	1	0	0	0	0.0166262
8305	235.987	2	0	1	0	0	0	0.0166245
8307	236.02	2	0	1	0	0	0	0.0166058
8309	236.053	2	0	1	0	0	0	0.0165728
8311	236.087	2	0	1	0	0	0	0.0165206
8313	236.12	2	0	1	0	0	0	0.0165717
8315	236.153	2	0	1	0	0	0	0.0165938
8317	236.187	2	0	1	0	0	0	0.0165791
8319	236.22	2	0	1	0	0	0	0.0165791
8321	236.253	2	0	1	0	0	0	0.0165853
8323	236.287	2	0	1	0	0	0	0.0165745
8325	236.32	2	0	1	0	0	0	0.0165916
8327	236.353	2	0	1	0	0	0	0.0165995
8329	236.387	2	0	1	0	0	0	0.0165796
8331	236.42	2	0	1	0	0	0	0.0165279
8333	236.453	2	0	1	0	0	0	0.0165637
8335	236.487	2	0	1	0	0	0	0.0165603
8337	236.52	2	0	1	0	0	0	0.016612
8339	236.553	2	0	1	0	0	0	0.0166075
8341	236.587	2	0	1	0	0	0	0.0166972
8343	236.62	2	0	1	0	0	0	0.0167597
8345	236.653	2	0	1	0	0	0	0.0167398
8347	236.687	2	0	1	0	0	0	0.016758
8349	236.72	2	0	1	0	0	0	0.0167733
8351	236.753	2	0	1	0	0	0	0.0167313
8353	236.787	2	0	1	0	0	0	0.0167693
8355	236.82	2	0	1	0	0	0	0.0167926
8357	236.853	2	0	1	0	0	0	0.0167631
8359	236.887	2	0	1	0	0	0	0.0168062
8361	236.92	2	0	1	0	0	0	0.0168369
8363	236.953	2	0	1	0	0	0	0.0167971
8365	236.987	2	0	1	0	0	0	0.0167937
8367	237.02	2	0	1	0	0	0	0.0168272
8369	237.053	2	0	1	0	0	0	0.0168903
8371	237.087	2	0	1	0	0	0	0.0168437
8373	237.12	2	0	1	0	0	0	0.0169323
8375	237.153	2	0	1	0	0	0	0.0168642
8377	237.187	2	0	1	0	0	0	0.0168704
8379	237.22	2	0	1	0	0	0	0.0169022
8381	237.253	2	0	1	0	0	0	0.0168937
8383	237.287	2	0	1	0	0	0	0.0168852
8385	237.32	2	0	1	0	0	0	0.0169323
8387	237.353	2	0	1	0	0	0	0.0168653
8389	237.387	2	0	1	0	0	0	0.0168182
8391	237.42	2	0	1	0	0	0	0.0167869
8393	237.453	2	0	1	0	0	0	0.0167279
8395	237.487	2	0	1	0	0	0	0.0168091
8397	237.52	2	0	1	0	0	0	0.0169034
8399	237.553	2	0	1	0	0	0	0.0168079
8401	237.587	2	0	1	0	0	0	0.0166631
8403	237.62	2	0	1	0	0	0	0.0166501
8405	237.653	2	0	1	0	0	0	0.0166671
8407	237.687	2	0	1	0	0	0	0.0167909
8409	237.72	2	0	1	0	0	0	0.0168153
8411	237.753	2	0	1	0	0	0	0.0167858
8413	237.787	2	0	1	0	0	0	0.0167432
8415	237.82	2	0	1	0	0	0	0.016675
8417	237.853	2	0	1	0	0	0	0.0166773
8419	237.887	2	0	1	0	0	0	0.0166995
8421	237.92	2	0	1	0	0	0	0.0166381
8423	237.953	2	0	1	0	0	0	0.016687
8425	237.987	2	0	1	0	0	0	0.0166909
8427	238.02	2	0	1	0	0	0	0.0166819
8429	238.053	2	0	1	0	0	0	0.0166756
8431	238.087	2	0	1	0	0	0	0.0166262
8433	238.12	2	0	1	0	0	0	0.0166052
8435	238.153	2	0	1	0	0	0	0.0165938
8437	238.187	2	0	1	0	0	0	0.016662
8439	238.22	2	0	1	0	0	0	0.0167097
8441	238.253	2	0	1	0	0	0	0.0166995
8443	238.287	2	0	1	0	0	0	0.0166625
8445	238.32	2	0	1	0	0	0	0.0166222
8447	238.353	2	0	1	0	0	0	0.0165609
8449	238.387	2	0	1	0	0	0	0.0165268
8451	238.42	2	0	1	0	0	0	0.0164939
8453	238.453	2	0	1	0	0	0	0.0166148
8455	238.487	2	0	1	0	0	0	0.0165859
8457	238.52	2	0	1	0	0	0	0.0165933
8459	238.553	2	0	1	0	0	0	0.0165637
8461	238.587	2	0	1	0	0	0	0.016612
8463	238.62	2	0	1	0	0	0	0.0165961
8465	238.653	2	0	1	0	0	0	0.0166001
8467	238.687	2	0	1	0	0	0	0.0165484
8469	238.72	2	0	1	0	0	0	0.0165177
8471	238.753	2	0	1	0	0	0	0.0164984
8473	238.787	2	0	1	0	0	0	0.0165421
8475	238.82	2	0	1	0	0	0	0.0165348
8477	238.853	2	0	1	0	0	0	0.0165705
8479	238.887	2	0	1	0	0	0	0.0165592
8481	238.92	2	0	1	0	0	0	0.016499
8483	238.953	2	0	1	0	0	0	0.0164098
8485	238.987	2	0	1	0	0	0	0.0164484
8487	239.02	2	0	1	0	0	0	0.0164445
8489	239.053	2	0	1	0	0	0	0.0164263
8491	239.087	2	0	1	0	0	0	0.0164399
8493	239.12	2	0	1	0	0	0	0.0164354
8495	239.153	2	0	1	0	0	0	0.0164706
8497	239.187	2	0	1	0	0	0	0.016374
8499	239.22	2	0	1	0	0	0	0.0164161
8501	239.253	2	0	1	0	0	0	0.0163882
8503	239.287	2	0	1	0	0	0	0.0163837
8505	239.32	2	0	1	0	0	0	0.0164234
8507	239.353	2	0	1	0	0	0	0.0164161
8509	239.387	2	0	1	0	0	0	0.0164354
8511	239.42	2	0	1	0	0	0	0.0164269
8513	239.453	2	0	1	0	0	0	0.0163871
8515	239.487	2	0	1	0	0	0	0.0163985
8517	239.52	2	0	1	0	0	0	0.0164621
8519	239.553	2	0	1	0	0	0	0.0163854
8521	239.587	2	0	1	0	0	0	0.0164842
8523	239.62	2	0	1	0	0	0	0.0164604
8525	239.653	2	0	1	0	0	0	0.0165319
8527	239.687	2	0	1	0	0	0	0.0165035
8529	239.72	2	0	1	0	0	0	0.0166097
8531	239.753	2	0	1	0	0	0	0.0165899
8533	239.787	2	0	1	0	0	0	0.0165285
8535	239.82	2	0	1	0	0	0	0.0166148
8537	239.853	2	0	1	0	0	0	0.01662
8539	239.887	2	0	1	0	0	0	0.0166438
8541	239.92	2	0	1	0	0	0	0.0166205
8543	239.953	2	0	1	0	0	0	0.0165842
8545	239.987	2	0	1	0	0	0	0.0165984
8547	240.02	2	0	1	0	0	0	0.0166603
8549	240.053	2	0	1	0	0	0	0.0165808
8551	240.087	2	0	1	0	0	0	0.0166137
8553	240.12	2	0	1	0	0	0	0.0166165
8555	240.153	2	0	1	0	0	0	0.0165864
8557	240.187	2	0	1	0	0	0	0.0165546
8559	240.22	2	0	1	0	0	0	0.0166137
8561	240.253	2	0	1	0	0	0	0.0165518
8563	240.287	2	0	1	0	0	0	0.0165302
8565	240.32	2	0	1	0	0	0	0.0165285
8567	240.353	2	0	1	0	0	0	0.0165257
8569	240.386	2	0	1	0	0	0	0.0165717
8571	240.42	2	0	1	0	0	0	0.016583
8573	240.453	2	0	1	0	0	0	0.0165933
8575	240.486	2	0	1	0	0	0	0.0166342
8577	240.52	2	0	1	0	0	0	0.0166745
8579	240.553	2	0	1	0	0	0	0.0166648
8581	240.586	2	0	1	0	0	0	0.016687
8583	240.62	2	0	1	0	0	0	0.0165842
8585	240.653	2	0	1	0	0	0	0.0166853
8587	240.686	2	0	1	0	0	0	0.0167017
8589	240.72	2	0	1	0	0	0	0.016679
8591	240.753	2	0	1	0	0	0	0.016637
8593	240.786	2	0	1	0	0	0	0.0167023
8595	240.82	2	0	1	0	0	0	0.0167086
8597	240.853	2	0	1	0	0	0	0.0167835
8599	240.886	2	0	1	0	0	0	0.0167103
8601	240.92	2	0	1	0	0	0	0.0167335
8603	240.953	2	0	1	0	0	0	0.0166739
8605	240.986	2	0	1	0	0	0	0.0166501
8607	241.02	2	0	1	0	0	0	0.0166489
8609	241.053	2	0	1	0	0	0	0.016687
8611	241.086	2	0	1	0	0	0	0.0166114
8613	241.12	2	0	1	0	0	0	0.0165955
8615	241.153	2	0	1	0	0	0	0.0166222
8617	241.186	2	0	1	0	0	0	0.016687
8619	241.22	2	0	1	0	0	0	0.0166745
8621	241.253	2	0	1	0	0	0	0.0166961
8623	241.286	2	0	1	0	0	0	0.0167091
8625	241.32	2	0	1	0	0	0	0.0165944
8627	241.353	2	0	1	0	0	0	0.0166694
8629	241.386	2	0	1	0	0	0	0.0166478
8631	241.42	2	0	1	0	0	0	0.0166654
8633	241.453	2	0	1	0	0	0	0.0166625
8635	241.486	2	0	1	0	0	0	0.016637
8637	241.52	2	0	1	0	0	0	0.016654
8639	241.553	2	0	1	0	0	0	0.0166955
8641	241.586	2	0	1	0	0	0	0.0167301
8643	241.62	2	0	1	0	0	0	0.016779
8645	241.653	2	0	1	0	0	0	0.0167483
8647	241.686	2	0	1	0	0	0	0.0167301
8649	241.72	2	0	1	0	0	0	0.0168539
8651	241.753	2	0	1	0	0	0	0.0168437
8653	241.786	2	0	1	0	0	0	0.0169306
8655	241.82	2	0	1	0	0	0	0.0169266
8657	241.853	2	0	1	0	0	0	0.0168727
8659	241.886	2	0	1	0	0	0	0.016875
8661	241.92	2	0	1	0	0	0	0.0168272
8663	241.953	2	0	1	0	0	0	0.0167665
8665	241.986	2	0	1	0	0	0	0.0166728
8667	242.02	2	0	1	0	0	0	0.0167682
8669	242.053	2	0	1	0	0	0	0.0168738
8671	242.086	2	0	1	0	0	0	0.0167591
8673	242.12	2	0	1	0	0	0	0.016771
8675	242.153	2	0	1	0	0	0	0.0167313
8677	242.186	2	0	1	0	0	0	0.0166279
8679	242.22	2	0	1	0	0	0	0.0166591
8681	242.253	2	0	1	0	0	0	0.0167335
8683	242.286	2	0	1	0	0	0	0.0167653
8685	242.32	2	0	1	0	0	0	0.0167352
8687	242.353	2	0	1	0	0	0	0.0167279
8689	242.386	2	0	1	0	0	0	0.0166268
8691	242.42	2	0	1	0	0	0	0.016637
8693	242.453	2	0	1	0	0	0	0.0165711
8695	242.486	2	0	1	0	0	0	0.0165762
8697	242.52	2	0	1	0	0	0	0.0165989
8699	242.553	2	0	1	0	0	0	0.0166898
8701	242.586	2	0	1	0	0	0	0.0167103
8703	242.62	2	0	1	0	0	0	0.0166972
8705	242.653	2	0	1	0	0	0	0.0166359
8707	242.686	2	0	1	0	0	0	0.0166608
8709	242.72	2	0	1	0	0	0	0.0166058
8711	242.753	2	0	1	0	0	0	0.0165785
8713	242.786	2	0	1	0	0	0	0.0165677
8715	242.82	2	0	1	0	0	0	0.0165751
8717	242.853	2	0	1	0	0	0	0.0165694
8719	242.886	2	0	1	0	0	0	0.0166563
8721	242.92	2	0	1	0	0	0	0.0166404
8723	242.953	2	0	1	0	0	0	0.0166251
8725	242.986	2	0	1	0	0	0	0.0166523
8727	243.02	2	0	1	0	0	0	0.0165882
8729	243.053	2	0	1	0	0	0	0.0166012
8731	243.086	2	0	1	0	0	0	0.0166052
8733	243.12	2	0	1	0	0	0	0.0166506
8735	243.153	2	0	1	0	0	0	0.0166733
8737	243.186	2	0	1	0	0	0	0.0167597
8739	243.22	2	0	1	0	0	0	0.0166978
8741	243.253	2	0	1	0	0	0	0.0167369
8743	243.286	2	0	1	0	0	0	0.0168159
8745	243.32	2	0	1	0	0	0	0.016829
8747	243.353	2	0	1	0	0	0	0.0168187
8749	243.386	2	0	1	0	0	0	0.0168
8751	243.42	2	0	1	0	0	0	0.0167801
8753	243.453	2	0	1	0	0	0	0.0167648
8755	243.486	2	0	1	0	0	0	0.0167387
8757	243.52	2	0	1	0	0	0	0.0167131
8759	243.553	2	0	1	0	0	0	0.0166983
8761	243.586	2	0	1	0	0	0	0.0167063
8763	243.62	2	0	1	0	0	0	0.0167915
8765	243.653	2	0	1	0	0	0	0.0167352
8767	243.686	2	0	1	0	0	0	0.0167012
8769	243.72	2	0	1	0	0	0	0.0167335
8771	243.753	2	0	1	0	0	0	0.0166836
8773	243.786	2	0	1	0	0	0	0.0166745
8775	243.82	2	0	1	0	0	0	0.0166796
8777	243.853	2	0	1	0	0	0	0.0166841
8779	243.886	2	0	1	0	0	0	0.0166887
8781	243.92	2	0	1	0	0	0	0.0166364
8783	243.953	2	0	1	0	0	0	0.0166239
8785	243.986	2	0	1	0	0	0	0.0166177
8787	244.02	2	0	1	0	0	0	0.0166052
8789	244.053	2	0	1	0	0	0	0.0165404
8791	244.086	2	0	1	0	0	0	0.0165461
8793	244.12	2	0	1	0	0	0	0.016549
8795	244.153	2	0	1	0	0	0	0.0166949
8797	244.186	2	0	1	0	0	0	0.0167017
8799	244.22	2	0	1	0	0	0	0.016708
8801	244.253	2	0	1	0	0	0	0.0167063
8803	244.286	2	0	1	0	0	0	0.0166779
8805	244.32	2	0	1	0	0	0	0.0166376
8807	244.353	2	0	1	0	0	0	0.0166847
8809	244.386	2	0	1	0	0	0	0.0166427
8811	244.42	2	0	1	0	0	0	0.016662
8813	244.453	2	0	1	0	0	0	0.0166654
8815	244.486	2	0	1	0	0	0	0.0166035
8817	244.52	2	0	1	0	0	0	0.0166614
8819	244.553	2	0	1	0	0	0	0.0165359
8821	244.586	2	0	1	0	0	0	0.0166302
8823	244.62	2	0	1	0	0	0	0.0166092
8825	244.653	2	0	1	0	0	0	0.0166506
8827	244.686	2	0	1	0	0	0	0.0166472
8829	244.72	2	0	1	0	0	0	0.0166319
8831	244.753	2	0	1	0	0	0	0.0166603
8833	244.786	2	0	1	0	0	0	0.0166188
8835	244.82	2	0	1	0	0	0	0.0166694
8837	244.853	2	0	1	0	0	0	0.0167125
8839	244.886	2	0	1	0	0	0	0.0166887
8841	244.92	2	0	1	0	0	0	0.0166819
8843	244.953	2	0	1	0	0	0	0.0166949
8845	244.986	2	0	1	0	0	0	0.0167301
8847	245.02	2	0	1	0	0	0	0.0167716
8849	245.053	2	0	1	0	0	0	0.0167608
8851	245.086	2	0	1	0	0	0	0.0167523
8853	245.12	2	0	1	0	0	0	0.016712
8855	245.153	2	0	1	0	0	0	0.0167279
8857	245.186	2	0	1	0	0	0	0.0167881
8859	245.22	2	0	1	0	0	0	0.0167847
8861	245.253	2	0	1	0	0	0	0.0167563
8863	245.286	2	0	1	0	0	0	0.0167648
8865	245.32	2	0	1	0	0	0	0.0167608
8867	245.353	2	0	1	0	0	0	0.016679
8869	245.386	2	0	1	0	0	0	0.0166983
8871	245.42	2	0	1	0	0	0	0.0167449
8873	245.453	2	0	1	0	0	0	0.0166313
8875	245.486	2	0	1	0	0	0	0.0166432
8877	245.52	2	0	1	0	0	0	0.0166194
8879	245.553	2	0	1	0	0	0	0.0165785
8881	245.586	2	0	1	0	0	0	0.016629
8883	245.62	2	0	1	0	0	0	0.0165461
8885	245.653	2	0	1	0	0	0	0.0165234
8887	245.686	2	0	1	0	0	0	0.016595
8889	245.72	2	0	1	0	0	0	0.016537
8891	245.753	2	0	1	0	0	0	0.0166103
8893	245.786	2	0	1	0	0	0	0.0165813
8895	245.82	2	0	1	0	0	0	0.0165876
8897	245.853	2	0	1	0	0	0	0.0165967
8899	245.886	2	0	1	0	0	0	0.0165677
8901	245.92	2	0	1	0	0	0	0.0165762
8903	245.953	2	0	1	0	0	0	0.016629
8905	245.986	2	0	1	0	0	0	0.0165972
8907	246.02	2	0	1	0	0	0	0.0165938
8909	246.053	2	0	1	0	0	0	0.0165876
8911	246.086	2	0	1	0	0	0	0.0166347
8913	246.12	2	0	1	0	0	0	0.0167023
8915	246.153	2	0	1	0	0	0	0.0167131
8917	246.186	2	0	1	0	0	0	0.0167494
8919	246.22	2	0	1	0	0	0	0.0167682
8921	246.253	2	0	1	0	0	0	0.0167966
8923	246.286	2	0	1	0	0	0	0.0168358
8925	246.32	2	0	1	0	0	0	0.0167881
8927	246.353	2	0	1	0	0	0	0.0168596
8929	246.386	2	0	1	0	0	0	0.0167971
8931	246.42	2	0	1	0	0	0	0.0168102
8933	246.453	2	0	1	0	0	0	0.0168244
8935	246.486	2	0	1	0	0	0	0.016842
8937	246.52	2	0	1	0	0	0	0.0168568
8939	246.553	2	0	1	0	0	0	0.0168329
8941	246.586	2	0	1	0	0	0	0.0168011
8943	246.62	2	0	1	0	0	0	0.0167585
8945	246.653	2	0	1	0	0	0	0.0168267
8947	246.686	2	0	1	0	0	0	0.0168693
8949	246.72	2	0	1	0	0	0	0.0167619
8951	246.753	2	0	1	0	0	0	0.0167733
8953	246.786	2	0	1	0	0	0	0.0167722
8955	246.82	2	0	1	0	0	0	0.0168142
8957	246.853	2	0	1	0	0	0	0.0167852
8959	246.886	2	0	1	0	0	0	0.016779
8961	246.92	2	0	1	0	0	0	0.0167057
8963	246.953	2	0	1	0	0	0	0.0166722
8965	246.986	2	0	1	0	0	0	0.0167563
8967	247.02	2	0	1	0	0	0	0.0168057
8969	247.053	2	0	1	0	0	0	0.0167898
8971	247.086	2	0	1	0	0	0	0.0167176
8973	247.12	2	0	1	0	0	0	0.0167262
8975	247.153	2	0	1	0	0	0	0.0167619
8977	247.186	2	0	1	0	0	0	0.0168261
8979	247.22	2	0	1	0	0	0	0.0167404
8981	247.253	2	0	1	0	0	0	0.0167636
8983	247.286	2	0	1	0	0	0	0.016746
8985	247.32	2	0	1	0	0	0	0.0167358
8987	247.353	2	0	1	0	0	0	0.0168244
8989	247.386	2	0	1	0	0	0	0.0168301
8991	247.42	2	0	1	0	0	0	0.016817
8993	247.453	2	0	1	0	0	0	0.0167625
8995	247.486	2	0	1	0	0	0	0.0167801
8997	247.52	2	0	1	0	0	0	0.0167852
8999	247.553	2	0	1	0	0	0	0.016871
9001	247.586	2	0	1	0	0	0	0.0168346
9003	247.62	2	0	1	0	0	0	0.0167665
9005	247.653	2	0	1	0	0	0	0.0167983
9007	247.686	2	0	1	0	0	0	0.0167341
9009	247.72	2	0	1	0	0	0	0.0168943
9011	247.753	2	0	1	0	0	0	0.016842
9013	247.786	2	0	1	0	0	0	0.0168153
9015	247.82	2	0	1	0	0	0	0.0169295
9017	247.853	2	0	1	0	0	0	0.0168795
9019	247.886	2	0	1	0	0	0	0.0168943
9021	247.92	2	0	1	0	0	0	0.0168687
9023	247.953	2	0	1	0	0	0	0.016884
9025	247.986	2	0	1	0	0	0	0.0168443
9027	248.02	2	0	1	0	0	0	0.0167659
9029	248.053	2	0	1	0	0	0	0.0168857
9031	248.086	2	0	1	0	0	0	0.0168534
9033	248.12	2	0	1	0	0	0	0.0167812
9035	248.153	2	0	1	0	0	0	0.0168159
9037	248.186	2	0	1	0	0	0	0.0167864
9039	248.22	2	0	1	0	0	0	0.016846
9041	248.253	2	0	1	0	0	0	0.0168165
9043	248.286	2	0	1	0	0	0	0.0167262
9045	248.32	2	0	1	0	0	0	0.0167739
9047	248.353	2	0	1	0	0	0	0.0167591
9049	248.386	2	0	1	0	0	0	0.0167494
9051	248.42	2	0	1	0	0	0	0.0167097
9053	248.453	2	0	1	0	0	0	0.0167432
9055	248.486	2	0	1	0	0	0	0.0167767
9057	248.52	2	0	1	0	0	0	0.016704
9059	248.553	2	0	1	0	0	0	0.0167602
9061	248.586	2	0	1	0	0	0	0.0167744
9063	248.62	2	0	1	0	0	0	0.0167279
9065	248.653	2	0	1	0	0	0	0.0167415
9067	248.686	2	0	1	0	0	0	0.0166875
9069	248.72	2	0	1	0	0	0	0.0167551
9071	248.753	2	0	1	0	0	0	0.0167864
9073	248.786	2	0	1	0	0	0	0.0168074
9075	248.82	2	0	1	0	0	0	0.0168562
9077	248.853	2	0	1	0	0	0	0.0168028
9079	248.886	2	0	1	0	0	0	0.0168409
9081	248.919	2	0	1	0	0	0	0.016817
9083	248.953	2	0	1	0	0	0	0.0168698
9085	248.986	2	0	1	0	0	0	0.0168051
9087	249.019	2	0	1	0	0	0	0.0167091
9089	249.053	2	0	1	0	0	0	0.0167943
9091	249.086	2	0	1	0	0	0	0.0168011
9093	249.119	2	0	1	0	0	0	0.0167699
9095	249.153	2	0	1	0	0	0	0.0167279
9097	249.186	2	0	1	0	0	0	0.0166796
9099	249.219	2	0	1	0	0	0	0.0166875
9101	249.253	2	0	1	0	0	0	0.016666
9103	249.286	2	0	1	0	0	0	0.0166444
9105	249.319	2	0	1	0	0	0	0.0166165
9107	249.353	2	0	1	0	0	0	0.0165677
9109	249.386	2	0	1	0	0	0	0.0165825
9111	249.419	2	0	1	0	0	0	0.0166245
9113	249.453	2	0	1	0	0	0	0.0165058
9115	249.486	2	0	1	0	0	0	0.0166217
9117	249.519	2	0	1	0	0	0	0.016633
9119	249.553	2	0	1	0	0	0	0.0166154
9121	249.586	2	0	1	0	0	0	0.0165989
9123	249.619	2	0	1	0	0	0	0.0166069
9125	249.653	2	0	1	0	0	0	0.016512
9127	249.686	2	0	1	0	0	0	0.0165325
9129	249.719	2	0	1	0	0	0	0.0166432
9131	249.753	2	0	1	0	0	0	0.0166512
9133	249.786	2	0	1	0	0	0	0.016687
9135	249.819	2	0	1	0	0	0	0.0166228
9137	249.853	2	0	1	0	0	0	0.0166131
9139	249.886	2	0	1	0	0	0	0.016704
9141	249.919	2	0	1	0	0	0	0.0166114
9143	249.953	2	0	1	0	0	0	0.0166319
9145	249.986	2	0	1	0	0	0	0.0165938
9147	250.019	2	0	1	0	0	0	0.0165603
9149	250.053	2	0	1	0	0	0	0.0165529
9151	250.086	2	0	1	0	0	0	0.0165223
9153	250.119	2	0	1	0	0	0	0.0165421
9155	250.153	2	0	1	0	0	0	0.0165512
9157	250.186	2	0	1	0	0	0	0.0166058
9159	250.219	2	0	1	0	0	0	0.0165978
9161	250.253	2	0	1	0	0	0	0.0166205
9163	250.286	2	0	1	0	0	0	0.016633
9165	250.319	2	0	1	0	0	0	0.0166279
9167	250.353	2	0	1	0	0	0	0.0165649
9169	250.386	2	0	1	0	0	0	0.0166529
9171	250.419	2	0	1	0	0	0	0.0166109
9173	250.453	2	0	1	0	0	0	0.0166512
9175	250.486	2	0	1	0	0	0	0.0166449
9177	250.519	2	0	1	0	0	0	0.0167074
9179	250.553	2	0	1	0	0	0	0.0167137
9181	250.586	2	0	1	0	0	0	0.0167369
9183	250.619	2	0	1	0	0	0	0.0167546
9185	250.653	2	0	1	0	0	0	0.0168369
9187	250.686	2	0	1	0	0	0	0.0167784
9189	250.719	2	0	1	0	0	0	0.0167227
9191	250.753	2	0	1	0	0	0	0.0167273
9193	250.786	2	0	1	0	0	0	0.0167625
9195	250.819	2	0	1	0	0	0	0.0168079
9197	250.853	2	0	1	0	0	0	0.0166955
9199	250.886	2	0	1	0	0	0	0.0166046
9201	250.919	2	0	1	0	0	0	0.0166092
9203	250.953	2	0	1	0	0	0	0.0166546
9205	250.986	2	0	1	0	0	0	0.0166785
9207	251.019	2	0	1	0	0	0	0.0166802
9209	251.053	2	0	1	0	0	0	0.0165751
9211	251.086	2	0	1	0	0	0	0.0166097
9213	251.119	2	0	1	0	0	0	0.0165138
9215	251.153	2	0	1	0	0	0	0.0164791
9217	251.186	2	0	1	0	0	0	0.0165609
9219	251.219	2	0	1	0	0	0	0.0164996
9221	251.253	2	0	1	0	0	0	0.0165904
9223	251.286	2	0	1	0	0	0	0.0165484
9225	251.319	2	0	1	0	0	0	0.01657
9227	251.353	2	0	1	0	0	0	0.0165512
9229	251.386	2	0	1	0	0	0	0.0164819
9231	251.419	2	0	1	0	0	0	0.0165041
9233	251.453	2	0	1	0	0	0	0.0164956
9235	251.486	2	0	1	0	0	0	0.016424
9237	251.519	2	0	1	0	0	0	0.0165421
9239	251.553	2	0	1	0	0	0	0.0165274
9241	251.586	2	0	1	0	0	0	0.016537
9243	251.619	2	0	1	0	0	0	0.0165245
9245	251.653	2	0	1	0	0	0	0.0165632
9247	251.686	2	0	1	0	0	0	0.0166307
9249	251.719	2	0	1	0	0	0	0.0166245
9251	251.753	2	0	1	0	0	0	0.016658
9253	251.786	2	0	1	0	0	0	0.0166302
9255	251.819	2	0	1	0	0	0	0.0166853
9257	251.853	2	0	1	0	0	0	0.0166728
9259	251.886	2	0	1	0	0	0	0.0166938
9261	251.919	2	0	1	0	0	0	0.0167182
9263	251.953	2	0	1	0	0	0	0.0167023
9265	251.986	2	0	1	0	0	0	0.0167449
9267	252.019	2	0	1	0	0	0	0.0167534
9269	252.053	2	0	1	0	0	0	0.0167335
9271	252.086	2	0	1	0	0	0	0.0168
9273	252.119	2	0	1	0	0	0	0.0167665
9275	252.153	2	0	1	0	0	0	0.0168136
9277	252.186	2	0	1	0	0	0	0.0167642
9279	252.219	2	0	1	0	0	0	0.0167273
9281	252.253	2	0	1	0	0	0	0.0167517
9283	252.286	2	0	1	0	0	0	0.0167483
9285	252.319	2	0	1	0	0	0	0.0167239
9287	252.353	2	0	1	0	0	0	0.016708
9289	252.386	2	0	1	0	0	0	0.0166455
9291	252.419	2	0	1	0	0	0	0.0166421
9293	252.453	2	0	1	0	0	0	0.0166427
9295	252.486	2	0	1	0	0	0	0.0166926
9297	252.519	2	0	1	0	0	0	0.0165933
9299	252.553	2	0	1	0	0	0	0.0166143
9301	252.586	2	0	1	0	0	0	0.0166211
9303	252.619	2	0	1	0	0	0	0.0165444
9305	252.653	2	0	1	0	0	0	0.0165632
9307	252.686	2	0	1	0	0	0	0.0164609
9309	252.719	2	0	1	0	0	0	0.01642
9311	252.753	2	0	1	0	0	0	0.0164666
9313	252.786	2	0	1	0	0	0	0.0164172
9315	252.819	2	0	1	0	0	0	0.0163252
9317	252.853	2	0	1	0	0	0	0.0163615
9319	252.886	2	0	1	0	0	0	0.0163235
9321	252.919	2	0	1	0	0	0	0.0163258
9323	252.953	2	0	1	0	0	0	0.016311
9325	252.986	2	0	1	0	0	0	0.0163428
9327	253.019	2	0	1	0	0	0	0.0162877
9329	253.053	2	0	1	0	0	0	0.0162423
9331	253.086	2	0	1	0	0	0	0.0161878
9333	253.119	2	0	1	0	0	0	0.0161577
9335	253.153	2	0	1	0	0	0	0.016265
9337	253.186	2	0	1	0	0	0	0.016261
9339	253.219	2	0	1	0	0	0	0.0162536
9341	253.253	2	0	1	0	0	0	0.0162945
9343	253.286	2	0	1	0	0	0	0.0162934
9345	253.319	2	0	1	0	0	0	0.0162809
9347	253.353	2	0	1	0	0	0	0.0163121
9349	253.386	2	0	1	0	0	0	0.0163882
9351	253.419	2	0	1	0	0	0	0.0163667
9353	253.453	2	0	1	0	0	0	0.01634
9355	253.486	2	0	1	0	0	0	0.0163485
9357	253.519	2	0	1	0	0	0	0.0164274
9359	253.553	2	0	1	0	0	0	0.0164649
9361	253.586	2	0	1	0	0	0	0.016457
9363	253.619	2	0	1	0	0	0	0.0164689
9365	253.653	2	0	1	0	0	0	0.0165109
9367	253.686	2	0	1	0	0	0	0.0165268
9369	253.719	2	0	1	0	0	0	0.0165387
9371	253.753	2	0	1	0	0	0	0.0166682
9373	253.786	2	0	1	0	0	0	0.0166273
9375	253.819	2	0	1	0	0	0	0.0166239
9377	253.853	2	0	1	0	0	0	0.0167074
9379	253.886	2	0	1	0	0	0	0.0167108
9381	253.919	2	0	1	0	0	0	0.016616
9383	253.953	2	0	1	0	0	0	0.0166733
9385	253.986	2	0	1	0	0	0	0.0166824
9387	254.019	2	0	1	0	0	0	0.016608
9389	254.053	2	0	1	0	0	0	0.0165671
9391	254.086	2	0	1	0	0	0	0.0166273
9393	254.119	2	0	1	0	0	0	0.0165586
9395	254.153	2	0	1	0	0	0	0.0165819
9397	254.186	2	0	1	0	0	0	0.0166387
9399	254.219	2	0	1	0	0	0	0.0166029
9401	254.253	2	0	1	0	0	0	0.0165552
9403	254.286	2	0	1	0	0	0	0.0165058
9405	254.319	2	0	1	0	0	0	0.0165302
9407	254.353	2	0	1	0	0	0	0.0164587
9409	254.386	2	0	1	0	0	0	0.0165018
9411	254.419	2	0	1	0	0	0	0.0164604
9413	254.453	2	0	1	0	0	0	0.0164746
9415	254.486	2	0	1	0	0	0	0.0164905
9417	254.519	2	0	1	0	0	0	0.016466
9419	254.553	2	0	1	0	0	0	0.0164978
9421	254.586	2	0	1	0	0	0	0.0164842
9423	254.619	2	0	1	0	0	0	0.0164433
9425	254.653	2	0	1	0	0	0	0.0164746
9427	254.686	2	0	1	0	0	0	0.0164354
9429	254.719	2	0	1	0	0	0	0.0164479
9431	254.753	2	0	1	0	0	0	0.0164592
9433	254.786	2	0	1	0	0	0	0.0164382
9435	254.819	2	0	1	0	0	0	0.016445
9437	254.853	2	0	1	0	0	0	0.0164547
9439	254.886	2	0	1	0	0	0	0.0164575
9441	254.919	2	0	1	0	0	0	0.0163684
9443	254.953	2	0	1	0	0	0	0.0164467
9445	254.986	2	0	1	0	0	0	0.0163576
9447	255.019	2	0	1	0	0	0	0.0164592
9449	255.053	2	0	1	0	0	0	0.0164428
9451	255.086	2	0	1	0	0	0	0.0164643
9453	255.119	2	0	1	0	0	0	0.0164615
9455	255.153	2	0	1	0	0	0	0.0164382
9457	255.186	2	0	1	0	0	0	0.01652
9459	255.219	2	0	1	0	0	0	0.0165126
9461	255.253	2	0	1	0	0	0	0.0165064
9463	255.286	2	0	1	0	0	0	0.0165109
9465	255.319	2	0	1	0	0	0	0.0165518
9467	255.353	2	0	1	0	0	0	0.0165541
9469	255.386	2	0	1	0	0	0	0.0165683
9471	255.419	2	0	1	0	0	0	0.0165705
9473	255.453	2	0	1	0	0	0	0.0164899
9475	255.486	2	0	1	0	0	0	0.0165245
9477	255.519	2	0	1	0	0	0	0.0166154
9479	255.553	2	0	1	0	0	0	0.0165972
9481	255.586	2	0	1	0	0	0	0.0165495
9483	255.619	2	0	1	0	0	0	0.0165461
9485	255.653	2	0	1	0	0	0	0.0166023
9487	255.686	2	0	1	0	0	0	0.0165353
9489	255.719	2	0	1	0	0	0	0.0165529
9491	255.753	2	0	1	0	0	0	0.0165546
9493	255.786	2	0	1	0	0	0	0.0165842
9495	255.819	2	0	1	0	0	0	0.0165887
9497	255.853	2	0	1	0	0	0	0.0166188
9499	255.886	2	0	1	0	0	0	0.0165603
9501	255.919	2	0	1	0	0	0	0.0165467
9503	255.953	2	0	1	0	0	0	0.0165683
9505	255.986	2	0	1	0	0	0	0.0165598
9507	256.019	2	0	1	0	0	0	0.0165058
9509	256.053	2	0	1	0	0	0	0.0165331
9511	256.086	2	0	1	0	0	0	0.016545
9513	256.119	2	0	1	0	0	0	0.0165155
9515	256.153	2	0	1	0	0	0	0.0165552
9517	256.186	2	0	1	0	0	0	0.0165586
9519	256.219	2	0	1	0	0	0	0.0165274
9521	256.253	2	0	1	0	0	0	0.0165586
9523	256.286	2	0	1	0	0	0	0.0165064
9525	256.319	2	0	1	0	0	0	0.0164547
9527	256.353	2	0	1	0	0	0	0.0164922
9529	256.386	2	0	1	0	0	0	0.016549
9531	256.419	2	0	1	0	0	0	0.0164893
9533	256.453	2	0	1	0	0	0	0.0165172
9535	256.486	2	0	1	0	0	0	0.0165041
9537	256.519	2	0	1	0	0	0	0.016524
9539	256.553	2	0	1	0	0	0	0.0165262
9541	256.586	2	0	1	0	0	0	0.0165711
9543	256.619	2	0	1	0	0	0	0.016491
9545	256.653	2	0	1	0	0	0	0.0164808
9547	256.686	2	0	1	0	0	0	0.0164916
9549	256.719	2	0	1	0	0	0	0.0165972
9551	256.753	2	0	1	0	0	0	0.0166075
9553	256.786	2	0	1	0	0	0	0.0165938
9555	256.819	2	0	1	0	0	0	0.0166285
9557	256.853	2	0	1	0	0	0	0.0166262
9559	256.886	2	0	1	0	0	0	0.0166006
9561	256.919	2	0	1	0	0	0	0.0166472
9563	256.953	2	0	1	0	0	0	0.0166307
9565	256.986	2	0	1	0	0	0	0.0166671
9567	257.019	2	0	1	0	0	0	0.0166773
9569	257.053	2	0	1	0	0	0	0.0167284
9571	257.086	2	0	1	0	0	0	0.0166926
9573	257.119	2	0	1	0	0	0	0.0167057
9575	257.153	2	0	1	0	0	0	0.0166819
9577	257.186	2	0	1	0	0	0	0.0166932
9579	257.219	2	0	1	0	0	0	0.0166092
9581	257.253	2	0	1	0	0	0	0.016608
9583	257.286	2	0	1	0	0	0	0.016583
9585	257.319	2	0	1	0	0	0	0.0165967
9587	257.352	2	0	1	0	0	0	0.0165791
9589	257.386	2	0	1	0	0	0	0.0165035
9591	257.419	2	0	1	0	0	0	0.0165433
9593	257.452	2	0	1	0	0	0	0.0165717
9595	257.486	2	0	1	0	0	0	0.0165336
9597	257.519	2	0	1	0	0	0	0.016503
9599	257.552	2	0	1	0	0	0	0.0165166
9601	257.586	2	0	1	0	0	0	0.0164649
9603	257.619	2	0	1	0	0	0	0.0164479
9605	257.652	2	0	1	0	0	0	0.0163638
9607	257.686	2	0	1	0	0	0	0.0163803
9609	257.719	2	0	1	0	0	0	0.0164297
9611	257.752	2	0	1	0	0	0	0.0164416
9613	257.786	2	0	1	0	0	0	0.0163576
9615	257.819	2	0	1	0	0	0	0.0162798
9617	257.852	2	0	1	0	0	0	0.016336
9619	257.886	2	0	1	0	0	0	0.0163473
9621	257.919	2	0	1	0	0	0	0.0163672
9623	257.952	2	0	1	0	0	0	0.0163207
9625	257.986	2	0	1	0	0	0	0.0163439
9627	258.019	2	0	1	0	0	0	0.0163695
9629	258.052	2	0	1	0	0	0	0.0163564
9631	258.086	2	0	1	0	0	0	0.0163638
9633	258.119	2	0	1	0	0	0	0.0163684
9635	258.152	2	0	1	0	0	0	0.0163729
9637	258.186	2	0	1	0	0	0	0.016399
9639	258.219	2	0	1	0	0	0	0.0163979
9641	258.252	2	0	1	0	0	0	0.016457
9643	258.286	2	0	1	0	0	0	0.0164961
9645	258.319	2	0	1	0	0	0	0.0164666
9647	258.352	2	0	1	0	0	0	0.0164984
9649	258.386	2	0	1	0	0	0	0.0165149
9651	258.419	2	0	1	0	0	0	0.0165819
9653	258.452	2	0	1	0	0	0	0.0165711
9655	258.486	2	0	1	0	0	0	0.016591
9657	258.519	2	0	1	0	0	0	0.0165961
9659	258.552	2	0	1	0	0	0	0.0166029
9661	258.586	2	0	1	0	0	0	0.0164956
9663	258.619	2	0	1	0	0	0	0.0165779
9665	258.652	2	0	1	0	0	0	0.0164956
9667	258.686	2	0	1	0	0	0	0.0164905
9669	258.719	2	0	1	0	0	0	0.0164195
9671	258.752	2	0	1	0	0	0	0.0164121
9673	258.786	2	0	1	0	0	0	0.0164138
9675	258.819	2	0	1	0	0	0	0.0164592
9677	258.852	2	0	1	0	0	0	0.0164961
9679	258.886	2	0	1	0	0	0	0.0164882
9681	258.919	2	0	1	0	0	0	0.0164757
9683	258.952	2	0	1	0	0	0	0.016453
9685	258.986	2	0	1	0	0	0	0.0164467
9687	259.019	2	0	1	0	0	0	0.016453
9689	259.052	2	0	1	0	0	0	0.0164604
9691	259.086	2	0	1	0	0	0	0.0164712
9693	259.119	2	0	1	0	0	0	0.016411
9695	259.152	2	0	1	0	0	0	0.0164848
9697	259.186	2	0	1	0	0	0	0.0164757
9699	259.219	2	0	1	0	0	0	0.016478
9701	259.252	2	0	1	0	0	0	0.0164672
9703	259.286	2	0	1	0	0	0	0.0164405
9705	259.319	2	0	1	0	0	0	0.0164229
9707	259.352	2	0	1	0	0	0	0.0164359
9709	259.386	2	0	1	0	0	0	0.0164416
9711	259.419	2	0	1	0	0	0	0.0163865
9713	259.452	2	0	1	0	0	0	0.0164473
9715	259.486	2	0	1	0	0	0	0.0164825
9717	259.519	2	0	1	0	0	0	0.0164712
9719	259.552	2	0	1	0	0	0	0.0164899
9721	259.586	2	0	1	0	0	0	0.0164882
9723	259.619	2	0	1	0	0	0	0.0165387
9725	259.652	2	0	1	0	0	0	0.0165774
9727	259.686	2	0	1	0	0	0	0.0166137
9729	259.719	2	0	1	0	0	0	0.0165717
9731	259.752	2	0	1	0	0	0	0.016641
9733	259.786	2	0	1	0	0	0	0.0166892
9735	259.819	2	0	1	0	0	0	0.0166364
9737	259.852	2	0	1	0	0	0	0.0166518
9739	259.886	2	0	1	0	0	0	0.0165598
9741	259.919	2	0	1	0	0	0	0.0166273
9743	259.952	2	0	1	0	0	0	0.0166114
9745	259.986	2	0	1	0	0	0	0.0167227
9747	260.019	2	0	1	0	0	0	0.0167523
9749	260.052	2	0	1	0	0	0	0.0166478
9751	260.086	2	0	1	0	0	0	0.0166597
9753	260.119	2	0	1	0	0	0	0.0166785
9755	260.152	2	0	1	0	0	0	0.0166841
9757	260.186	2	0	1	0	0	0	0.0166892
9759	260.219	2	0	1	0	0	0	0.0166506
9761	260.252	2	0	1	0	0	0	0.0166995
9763	260.286	2	0	1	0	0	0	0.0166836
9765	260.319	2	0	1	0	0	0	0.0166518
9767	260.352	2	0	1	0	0	0	0.0166421
9769	260.386	2	0	1	0	0	0	0.0166381
9771	260.419	2	0	1	0	0	0	0.0166279
9773	260.452	2	0	1	0	0	0	0.0165887
9775	260.486	2	0	1	0	0	0	0.0166523
9777	260.519	2	0	1	0	0	0	0.0166779
9779	260.552	2	0	1	0	0	0	0.0166625
9781	260.586	2	0	1	0	0	0	0.0166569
9783	260.619	2	0	1	0	0	0	0.0166847
9785	260.652	2	0	1	0	0	0	0.0166648
9787	260.686	2	0	1	0	0	0	0.0166858
9789	260.719	2	0	1	0	0	0	0.0166387
9791	260.752	2	0	1	0	0	0	0.0166813
9793	260.786	2	0	1	0	0	0	0.0166552
9795	260.819	2	0	1	0	0	0	0.0167154
9797	260.852	2	0	1	0	0	0	0.0166251
9799	260.886	2	0	1	0	0	0	0.0166285
9801	260.919	2	0	1	0	0	0	0.0166183
9803	260.952	2	0	1	0	0	0	0.0166296
9805	260.986	2	0	1	0	0	0	0.0166983
9807	261.019	2	0	1	0	0	0	0.0166921
9809	261.052	2	0	1	0	0	0	0.0166762
9811	261.086	2	0	1	0	0	0	0.0166552
9813	261.119	2	0	1	0	0	0	0.0166319
9815	261.152	2	0	1	0	0	0	0.0166046
9817	261.186	2	0	1	0	0	0	0.0166023
9819	261.219	2	0	1	0	0	0	0.0166035
9821	261.252	2	0	1	0	0	0	0.0165734
9823	261.286	2	0	1	0	0	0	0.0166307
9825	261.319	2	0	1	0	0	0	0.016541
9827	261.352	2	0	1	0	0	0	0.0165609
9829	261.386	2	0	1	0	0	0	0.0164632
9831	261.419	2	0	1	0	0	0	0.0164643
9833	261.452	2	0	1	0	0	0	0.0165228
9835	261.486	2	0	1	0	0	0	0.0165592
9837	261.519	2	0	1	0	0	0	0.0165461
9839	261.552	2	0	1	0	0	0	0.0166035
9841	261.586	2	0	1	0	0	0	0.0165609
9843	261.619	2	0	1	0	0	0	0.016566
9845	261.652	2	0	1	0	0	0	0.0165529
9847	261.686	2	0	1	0	0	0	0.0165671
9849	261.719	2	0	1	0	0	0	0.0165518
9851	261.752	2	0	1	0	0	0	0.0166245
9853	261.786	2	0	1	0	0	0	0.0165683
9855	261.819	2	0	1	0	0	0	0.0166688
9857	261.852	2	0	1	0	0	0	0.0165853
9859	261.886	2	0	1	0	0	0	0.0165541
9861	261.919	2	0	1	0	0	0	0.0165478
9863	261.952	2	0	1	0	0	0	0.0166069
9865	261.986	2	0	1	0	0	0	0.016612
9867	262.019	2	0	1	0	0	0	0.0166864
9869	262.052	2	0	1	0	0	0	0.0166773
9871	262.086	2	0	1	0	0	0	0.0166961
9873	262.119	2	0	1	0	0	0	0.0166989
9875	262.152	2	0	1	0	0	0	0.0167915
9877	262.186	2	0	1	0	0	0	0.0167608
9879	262.219	2	0	1	0	0	0	0.0166819
9881	262.252	2	0	1	0	0	0	0.0167222
9883	262.286	2	0	1	0	0	0	0.0166529
9885	262.319	2	0	1	0	0	0	0.0167585
9887	262.352	2	0	1	0	0	0	0.0166932
9889	262.386	2	0	1	0	0	0	0.0166444
9891	262.419	2	0	1	0	0	0	0.0165774
9893	262.452	2	0	1	0	0	0	0.0165507
9895	262.486	2	0	1	0	0	0	0.016537
9897	262.519	2	0	1	0	0	0	0.0165262
9899	262.552	2	0	1	0	0	0	0.0165251
9901	262.586	2	0	1	0	0	0	0.0164848
9903	262.619	2	0	1	0	0	0	0.0165007
9905	262.652	2	0	1	0	0	0	0.0164121
9907	262.686	2	0	1	0	0	0	0.0164257
9909	262.719	2	0	1	0	0	0	0.0164348
9911	262.752	2	0	1	0	0	0	0.016424
9913	262.786	2	0	1	0	0	0	0.0163956
9915	262.819	2	0	1	0	0	0	0.0163979
9917	262.852	2	0	1	0	0	0	0.0163536
9919	262.886	2	0	1	0	0	0	0.0163053
9921	262.919	2	0	1	0	0	0	0.0162644
9923	262.952	2	0	1	0	0	0	0.0162701
9925	262.986	2	0	1	0	0	0	0.0162843
9927	263.019	2	0	1	0	0	0	0.0162781
9929	263.052	2	0	1	0	0	0	0.0163547
9931	263.086	2	0	1	0	0	0	0.0162871
9933	263.119	2	0	1	0	0	0	0.0163087
9935	263.152	2	0	1	0	0	0	0.0163564
9937	263.186	2	0	1	0	0	0	0.0163411
9939	263.219	2	0	1	0	0	0	0.0163627
9941	263.252	2	0	1	0	0	0	0.0164013
9943	263.286	2	0	1	0	0	0	0.0164161
9945	263.319	2	0	1	0	0	0	0.0164325
9947	263.352	2	0	1	0	0	0	0.0165007
9949	263.386	2	0	1	0	0	0	0.0164814
9951	263.419	2	0	1	0	0	0	0.0165092
9953	263.452	2	0	1	0	0	0	0.0164837
9955	263.486	2	0	1	0	0	0	0.0165365
9957	263.519	2	0	1	0	0	0	0.016612
9959	263.552	2	0	1	0	0	0	0.0165671
9961	263.586	2	0	1	0	0	0	0.016558
9963	263.619	2	0	1	0	0	0	0.0166307
9965	263.652	2	0	1	0	0	0	0.0165524
9967	263.686	2	0	1	0	0	0	0.0165666
9969	263.719	2	0	1	0	0	0	0.0166268
9971	263.752	2	0	1	0	0	0	0.0166285
9973	263.786	2	0	1	0	0	0	0.0166432
9975	263.819	2	0	1	0	0	0	0.0166285
9977	263.852	2	0	1	0	0	0	0.0167108
9979	263.886	2	0	1	0	0	0	0.0166296
9981	263.919	2	0	1	0	0	0	0.0167443
9983	263.952	2	0	1	0	0	0	0.0166875
9985	263.986	2	0	1	0	0	0	0.0167744
9987	264.019	2	0	1	0	0	0	0.0166745
9989	264.052	2	0	1	0	0	0	0.016792
9991	264.086	2	0	1	0	0	0	0.0167971
9993	264.119	2	0	1	0	0	0	0.0167653
9995	264.152	2	0	1	0	0	0	0.0167659
9997	264.186	2	0	1	0	0	0	0.0168517
9999	264.219	2	0	1	0	0	0	0.0168182
10001	264.252	2	0	1	0	0	0	0.0168113
10003	264.286	2	0	1	0	0	0	0.0167778
10005	264.319	2	0	1	0	0	0	0.0168136
10007	264.352	2	0	1	0	0	0	0.0167903
10009	264.386	2	0	1	0	0	0	0.0167506
10011	264.419	2	0	1	0	0	0	0.0168017
10013	264.452	2	0	1	0	0	0	0.0168034
10015	264.486	2	0	1	0	0	0	0.016821
10017	264.519	2	0	1	0	0	0	0.016892
10019	264.552	2	0	1	0	0	0	0.0168216
10021	264.586	2	0	1	0	0	0	0.016838
10023	264.619	2	0	1	0	0	0	0.016871
10025	264.652	2	0	1	0	0	0	0.0168062
10027	264.686	2	0	1	0	0	0	0.0167653
10029	264.719	2	0	1	0	0	0	0.0167733
10031	264.752	2	0	1	0	0	0	0.0167227
10033	264.786	2	0	1	0	0	0	0.0167375
10035	264.819	2	0	1	0	0	0	0.0168023
10037	264.852	2	0	1	0	0	0	0.0168363
10039	264.886	2	0	1	0	0	0	0.0167722
10041	264.919	2	0	1	0	0	0	0.0167369
10043	264.952	2	0	1	0	0	0	0.0166978
10045	264.986	2	0	1	0	0	0	0.0166268
10047	265.019	2	0	1	0	0	0	0.0166796
10049	265.052	2	0	1	0	0	0	0.0166995
10051	265.086	2	0	1	0	0	0	0.0167103
10053	265.119	2	0	1	0	0	0	0.0166785
10055	265.152	2	0	1	0	0	0	0.0166092
10057	265.186	2	0	1	0	0	0	0.0166728
10059	265.219	2	0	1	0	0	0	0.016637
10061	265.252	2	0	1	0	0	0	0.0166222
10063	265.286	2	0	1	0	0	0	0.016566
10065	265.319	2	0	1	0	0	0	0.0165859
10067	265.352	2	0	1	0	0	0	0.0165688
10069	265.386	2	0	1	0	0	0	0.0165615
10071	265.419	2	0	1	0	0	0	0.0165882
10073	265.452	2	0	1	0	0	0	0.0165757
10075	265.486	2	0	1	0	0	0	0.016641
10077	265.519	2	0	1	0	0	0	0.0166637
10079	265.552	2	0	1	0	0	0	0.0166802
10081	265.586	2	0	1	0	0	0	0.0167057
10083	265.619	2	0	1	0	0	0	0.0166143
10085	265.652	2	0	1	0	0	0	0.0167284
10087	265.686	2	0	1	0	0	0	0.0167188
10089	265.719	2	0	1	0	0	0	0.0166608
10091	265.752	2	0	1	0	0	0	0.0166347
10093	265.785	2	0	1	0	0	0	0.0166387
10095	265.819	2	0	1	0	0	0	0.0166234
10097	265.852	2	0	1	0	0	0	0.0166432
10099	265.885	2	0	1	0	0	0	0.0165535
10101	265.919	2	0	1	0	0	0	0.0165632
10103	265.952	2	0	1	0	0	0	0.0165478
10105	265.985	2	0	1	0	0	0	0.0165933
10107	266.019	2	0	1	0	0	0	0.0166892
10109	266.052	2	0	1	0	0	0	0.0167517
10111	266.085	2	0	1	0	0	0	0.0167245
10113	266.119	2	0	1	0	0	0	0.0166097
10115	266.152	2	0	1	0	0	0	0.0166052
10117	266.185	2	0	1	0	0	0	0.0166342
10119	266.219	2	0	1	0	0	0	0.0167296
10121	266.252	2	0	1	0	0	0	0.0167051
10123	266.285	2	0	1	0	0	0	0.0167642
10125	266.319	2	0	1	0	0	0	0.0166864
10127	266.352	2	0	1	0	0	0	0.0166858
10129	266.385	2	0	1	0	0	0	0.0166995
10131	266.419	2	0	1	0	0	0	0.0166932
10133	266.452	2	0	1	0	0	0	0.0167131
10135	266.485	2	0	1	0	0	0	0.016679
10137	266.519	2	0	1	0	0	0	0.0166654
10139	266.552	2	0	1	0	0	0	0.0167051
10141	266.585	2	0	1	0	0	0	0.0166824
10143	266.619	2	0	1	0	0	0	0.0166716
10145	266.652	2	0	1	0	0	0	0.0167352
10147	266.685	2	0	1	0	0	0	0.0167068
10149	266.719	2	0	1	0	0	0	0.016729
10151	266.752	2	0	1	0	0	0	0.0167159
10153	266.785	2	0	1	0	0	0	0.016754
10155	266.819	2	0	1	0	0	0	0.0167443
10157	266.852	2	0	1	0	0	0	0.0167597
10159	266.885	2	0	1	0	0	0	0.0167705
10161	266.919	2	0	1	0	0	0	0.016746
10163	266.952	2	0	1	0	0	0	0.0166767
10165	266.985	2	0	1	0	0	0	0.0166688
10167	267.019	2	0	1	0	0	0	0.0167313
10169	267.052	2	0	1	0	0	0	0.0167284
10171	267.085	2	0	1	0	0	0	0.0167142
10173	267.119	2	0	1	0	0	0	0.0168199
10175	267.152	2	0	1	0	0	0	0.0168312
10177	267.185	2	0	1	0	0	0	0.0168613
10179	267.219	2	0	1	0	0	0	0.0169005
10181	267.252	2	0	1	0	0	0	0.0169812
10183	267.285	2	0	1	0	0	0	0.0169681
10185	267.319	2	0	1	0	0	0	0.0169403
10187	267.352	2	0	1	0	0	0	0.0169028
10189	267.385	2	0	1	0	0	0	0.0168789
10191	267.419	2	0	1	0	0	0	0.0169448
10193	267.452	2	0	1	0	0	0	0.0169687
10195	267.485	2	0	1	0	0	0	0.0170385
10197	267.519	2	0	1	0	0	0	0.0170993
10199	267.552	2	0	1	0	0	0	0.0171339
10201	267.585	2	0	1	0	0	0	0.0171459
10203	267.619	2	0	1	0	0	0	0.0171879
10205	267.652	2	0	1	0	0	0	0.0171209
10207	267.685	2	0	1	0	0	0	0.0170862
10209	267.719	2	0	1	0	0	0	0.0170908
10211	267.752	2	0	1	0	0	0	0.0171106
10213	267.785	2	0	1	0	0	0	0.0171016
10215	267.819	2	0	1	0	0	0	0.0170658
10217	267.852	2	0	1	0	0	0	0.0169653
10219	267.885	2	0	1	0	0	0	0.0170732
10221	267.919	2	0	1	0	0	0	0.0169834
10223	267.952	2	0	1	0	0	0	0.0169198
10225	267.985	2	0	1	0	0	0	0.0169533
10227	268.019	2	0	1	0	0	0	0.0168517
10229	268.052	2	0	1	0	0	0	0.0168994
10231	268.085	2	0	1	0	0	0	0.0168432
10233	268.119	2	0	1	0	0	0	0.0168182
10235	268.152	2	0	1	0	0	0	0.0167409
10237	268.185	2	0	1	0	0	0	0.0167455
10239	268.219	2	0	1	0	0	0	0.0167443
10241	268.252	2	0	1	0	0	0	0.0166603
10243	268.285	2	0	1	0	0	0	0.016612
10245	268.319	2	0	1	0	0	0	0.0166393
10247	268.352	2	0	1	0	0	0	0.0165944
10249	268.385	2	0	1	0	0	0	0.0165592
10251	268.419	2	0	1	0	0	0	0.0166671
10253	268.452	2	0	1	0	0	0	0.0166961
10255	268.485	2	0	1	0	0	0	0.0167267
10257	268.519	2	0	1	0	0	0	0.0166614
10259	268.552	2	0	1	0	0	0	0.0166858
10261	268.585	2	0	1	0	0	0	0.0166245
10263	268.619	2	0	1	0	0	0	0.0166909
10265	268.652	2	0	1	0	0	0	0.0167466
10267	268.685	2	0	1	0	0	0	0.0166978
10269	268.719	2	0	1	0	0	0	0.016721
10271	268.752	2	0	1	0	0	0	0.0167648
10273	268.785	2	0	1	0	0	0	0.0167506
10275	268.819	2	0	1	0	0	0	0.0167108
10277	268.852	2	0	1	0	0	0	0.0168517
10279	268.885	2	0	1	0	0	0	0.0168006
10281	268.919	2	0	1	0	0	0	0.0167869
10283	268.952	2	0	1	0	0	0	0.0168204
10285	268.985	2	0	1	0	0	0	0.0167029
10287	269.019	2	0	1	0	0	0	0.0166881
10289	269.052	2	0	1	0	0	0	0.0167364
10291	269.085	2	0	1	0	0	0	0.0167358
10293	269.119	2	0	1	0	0	0	0.0167693
10295	269.152	2	0	1	0	0	0	0.0167619
10297	269.185	2	0	1	0	0	0	0.0166881
10299	269.219	2	0	1	0	0	0	0.01662
10301	269.252	2	0	1	0	0	0	0.0166881
10303	269.285	2	0	1	0	0	0	0.0166518
10305	269.319	2	0	1	0	0	0	0.0166608
10307	269.352	2	0	1	0	0	0	0.0167313
10309	269.385	2	0	1	0	0	0	0.0166989
10311	269.419	2	0	1	0	0	0	0.0167614
10313	269.452	2	0	1	0	0	0	0.0168011
10315	269.485	2	0	1	0	0	0	0.0167795
10317	269.519	2	0	1	0	0	0	0.0167426
10319	269.552	2	0	1	0	0	0	0.0167756
10321	269.585	2	0	1	0	0	0	0.0166961
10323	269.619	2	0	1	0	0	0	0.0167284
10325	269.652	2	0	1	0	0	0	0.0167074
10327	269.685	2	0	1	0	0	0	0.0166461
10329	269.719	2	0	1	0	0	0	0.0166739
10331	269.752	2	0	1	0	0	0	0.0166966
10333	269.785	2	0	1	0	0	0	0.0166376
10335	269.819	2	0	1	0	0	0	0.0166364
10337	269.852	2	0	1	0	0	0	0.0166228
10339	269.885	2	0	1	0	0	0	0.0165961
10341	269.919	2	0	1	0	0	0	0.0166586
10343	269.952	2	0	1	0	0	0	0.0166716
10345	269.985	2	0	1	0	0	0	0.0166466
10347	270.019	2	0	1	0	0	0	0.0166637
10349	270.052	2	0	1	0	0	0	0.0166762
10351	270.085	2	0	1	0	0	0	0.0166921
10353	270.119	2	0	1	0	0	0	0.0167489
10355	270.152	2	0	1	0	0	0	0.0167989
10357	270.185	2	0	1	0	0	0	0.0167301
10359	270.219	2	0	1	0	0	0	0.0167608
10361	270.252	2	0	1	0	0	0	0.016775
10363	270.285	2	0	1	0	0	0	0.0167642
10365	270.319	2	0	1	0	0	0	0.0167233
10367	270.352	2	0	1	0	0	0	0.0167443
10369	270.385	2	0	1	0	0	0	0.0168108
10371	270.419	2	0	1	0	0	0	0.0167245
10373	270.452	2	0	1	0	0	0	0.0167455
10375	270.485	2	0	1	0	0	0	0.0167227
10377	270.519	2	0	1	0	0	0	0.0166773
10379	270.552	2	0	1	0	0	0	0.0166393
10381	270.585	2	0	1	0	0	0	0.0165796
10383	270.619	2	0	1	0	0	0	0.0165808
10385	270.652	2	0	1	0	0	0	0.0165382
10387	270.685	2	0	1	0	0	0	0.0164621
10389	270.719	2	0	1	0	0	0	0.016453
10391	270.752	2	0	1	0	0	0	0.016457
10393	270.785	2	0	1	0	0	0	0.0164416
10395	270.819	2	0	1	0	0	0	0.0163865
10397	270.852	2	0	1	0	0	0	0.0163615
10399	270.885	2	0	1	0	0	0	0.0163491
10401	270.919	2	0	1	0	0	0	0.0163133
10403	270.952	2	0	1	0	0	0	0.0162661
10405	270.985	2	0	1	0	0	0	0.0162531
10407	271.019	2	0	1	0	0	0	0.0162871
10409	271.052	2	0	1	0	0	0	0.0162843
10411	271.085	2	0	1	0	0	0	0.0163536
10413	271.119	2	0	1	0	0	0	0.016336
10415	271.152	2	0	1	0	0	0	0.0163615
10417	271.185	2	0	1	0	0	0	0.0163099
10419	271.219	2	0	1	0	0	0	0.0164007
10421	271.252	2	0	1	0	0	0	0.0163593
10423	271.285	2	0	1	0	0	0	0.0163559
10425	271.319	2	0	1	0	0	0	0.0164303
10427	271.352	2	0	1	0	0	0	0.0164036
10429	271.385	2	0	1	0	0	0	0.0163763
10431	271.419	2	0	1	0	0	0	0.0165132
10433	271.452	2	0	1	0	0	0	0.0165387
10435	271.485	2	0	1	0	0	0	0.0165064
10437	271.519	2	0	1	0	0	0	0.0164819
10439	271.552	2	0	1	0	0	0	0.0165365
10441	271.585	2	0	1	0	0	0	0.0165563
10443	271.619	2	0	1	0	0	0	0.0165507
10445	271.652	2	0	1	0	0	0	0.0166029
10447	271.685	2	0	1	0	0	0	0.0166995
10449	271.719	2	0	1	0	0	0	0.0167688
10451	271.752	2	0	1	0	0	0	0.016712
10453	271.785	2	0	1	0	0	0	0.0167705
10455	271.819	2	0	1	0	0	0	0.0168284
10457	271.852	2	0	1	0	0	0	0.0168897
10459	271.885	2	0	1	0	0	0	0.016909
10461	271.919	2	0	1	0	0	0	0.0169329
10463	271.952	2	0	1	0	0	0	0.0169726
10465	271.985	2	0	1	0	0	0	0.0169255
10467	272.019	2	0	1	0	0	0	0.0169357
10469	272.052	2	0	1	0	0	0	0.0169442
10471	272.085	2	0	1	0	0	0	0.0168869
10473	272.119	2	0	1	0	0	0	0.0169204
10475	272.152	2	0	1	0	0	0	0.0168261
10477	272.185	2	0	1	0	0	0	0.0167335
10479	272.219	2	0	1	0	0	0	0.016708
10481	272.252	2	0	1	0	0	0	0.0167114
10483	272.285	2	0	1	0	0	0	0.0167426
10485	272.319	2	0	1	0	0	0	0.0167137
10487	272.352	2	0	1	0	0	0	0.016725
10489	272.385	2	0	1	0	0	0	0.0166449
10491	272.419	2	0	1	0	0	0	0.0165757
10493	272.452	2	0	1	0	0	0	0.0165439
10495	272.485	2	0	1	0	0	0	0.0165632
10497	272.519	2	0	1	0	0	0	0.0164604
10499	272.552	2	0	1	0	0	0	0.0164496
10501	272.585	2	0	1	0	0	0	0.0163911
10503	272.619	2	0	1	0	0	0	0.0163519
10505	272.652	2	0	1	0	0	0	0.0164223
10507	272.685	2	0	1	0	0	0	0.0164956
10509	272.719	2	0	1	0	0	0	0.0164229
10511	272.752	2	0	1	0	0	0	0.0164439
10513	272.785	2	0	1	0	0	0	0.0165075
10515	272.819	2	0	1	0	0	0	0.0165643
10517	272.852	2	0	1	0	0	0	0.016558
10519	272.885	2	0	1	0	0	0	0.0165842
10521	272.919	2	0	1	0	0	0	0.0165916
10523	272.952	2	0	1	0	0	0	0.0165899
10525	272.985	2	0	1	0	0	0	0.0166285
10527	273.019	2	0	1	0	0	0	0.0166353
10529	273.052	2	0	1	0	0	0	0.0166222
10531	273.085	2	0	1	0	0	0	0.0166268
10533	273.119	2	0	1	0	0	0	0.0166092
10535	273.152	2	0	1	0	0	0	0.0166688
10537	273.185	2	0	1	0	0	0	0.016683
10539	273.219	2	0	1	0	0	0	0.0166972
10541	273.252	2	0	1	0	0	0	0.0166938
10543	273.285	2	0	1	0	0	0	0.0168182
10545	273.319	2	0	1	0	0	0	0.0168108
10547	273.352	2	0	1	0	0	0	0.0167801
10549	273.385	2	0	1	0	0	0	0.0168823
10551	273.419	2	0	1	0	0	0	0.0167608
10553	273.452	2	0	1	0	0	0	0.0168528
10555	273.485	2	0	1	0	0	0	0.01685
10557	273.519	2	0	1	0	0	0	0.0168494
10559	273.552	2	0	1	0	0	0	0.0167835
10561	273.585	2	0	1	0	0	0	0.0167852
10563	273.619	2	0	1	0	0	0	0.0167937
10565	273.652	2	0	1	0	0	0	0.0168375
10567	273.685	2	0	1	0	0	0	0.0168994
10569	273.718	2	0	1	0	0	0	0.0168437
10571	273.752	2	0	1	0	0	0	0.0167614
10573	273.785	2	0	1	0	0	0	0.0167455
10575	273.818	2	0	1	0	0	0	0.0167875
10577	273.852	2	0	1	0	0	0	0.0166875
10579	273.885	2	0	1	0	0	0	0.0166307
10581	273.918	2	0	1	0	0	0	0.016712
10583	273.952	2	0	1	0	0	0	0.0166432
10585	273.985	2	0	1	0	0	0	0.0167245
10587	274.018	2	0	1	0	0	0	0.0166586
10589	274.052	2	0	1	0	0	0	0.01662
10591	274.085	2	0	1	0	0	0	0.0166472
10593	274.118	2	0	1	0	0	0	0.0166131
10595	274.152	2	0	1	0	0	0	0.016608
10597	274.185	2	0	1	0	0	0	0.0166092
10599	274.218	2	0	1	0	0	0	0.0166739
10601	274.252	2	0	1	0	0	0	0.0166307
10603	274.285	2	0	1	0	0	0	0.0166381
10605	274.318	2	0	1	0	0	0	0.016549
10607	274.352	2	0	1	0	0	0	0.0165598
10609	274.385	2	0	1	0	0	0	0.0165813
10611	274.418	2	0	1	0	0	0	0.0165717
10613	274.452	2	0	1	0	0	0	0.0165722
10615	274.485	2	0	1	0	0	0	0.01657
10617	274.518	2	0	1	0	0	0	0.0166097
10619	274.552	2	0	1	0	0	0	0.0165859
10621	274.585	2	0	1	0	0	0	0.0165683
10623	274.618	2	0	1	0	0	0	0.016566
10625	274.652	2	0	1	0	0	0	0.0166001
10627	274.685	2	0	1	0	0	0	0.0166092
10629	274.718	2	0	1	0	0	0	0.0166075
10631	274.752	2	0	1	0	0	0	0.0166625
10633	274.785	2	0	1	0	0	0	0.0166819
10635	274.818	2	0	1	0	0	0	0.0166342
10637	274.852	2	0	1	0	0	0	0.0166699
10639	274.885	2	0	1	0	0	0	0.0165842
10641	274.918	2	0	1	0	0	0	0.0165989
10643	274.952	2	0	1	0	0	0	0.0166296
10645	274.985	2	0	1	0	0	0	0.0166154
10647	275.018	2	0	1	0	0	0	0.0166557
10649	275.052	2	0	1	0	0	0	0.0166359
10651	275.085	2	0	1	0	0	0	0.0166716
10653	275.118	2	0	1	0	0	0	0.0167523
10655	275.152	2	0	1	0	0	0	0.0168335
10657	275.185	2	0	1	0	0	0	0.0167529
10659	275.218	2	0	1	0	0	0	0.0167006
10661	275.252	2	0	1	0	0	0	0.0167625
10663	275.285	2	0	1	0	0	0	0.0167733
10665	275.318	2	0	1	0	0	0	0.0167494
10667	275.352	2	0	1	0	0	0	0.0167443
10669	275.385	2	0	1	0	0	0	0.0167125
10671	275.418	2	0	1	0	0	0	0.016666
10673	275.452	2	0	1	0	0	0	0.0167347
10675	275.485	2	0	1	0	0	0	0.0166597
10677	275.518	2	0	1	0	0	0	0.0166472
10679	275.552	2	0	1	0	0	0	0.0166029
10681	275.585	2	0	1	0	0	0	0.016633
10683	275.618	2	0	1	0	0	0	0.0166234
10685	275.652	2	0	1	0	0	0	0.0165916
10687	275.685	2	0	1	0	0	0	0.0165359
10689	275.718	2	0	1	0	0	0	0.0164944
10691	275.752	2	0	1	0	0	0	0.0164501
10693	275.785	2	0	1	0	0	0	0.0164768
10695	275.818	2	0	1	0	0	0	0.0165251
10697	275.852	2	0	1	0	0	0	0.0165325
10699	275.885	2	0	1	0	0	0	0.0165092
10701	275.918	2	0	1	0	0	0	0.0164729
10703	275.952	2	0	1	0	0	0	0.0165785
10705	275.985	2	0	1	0	0	0	0.0164746
10707	276.018	2	0	1	0	0	0	0.0164956
10709	276.052	2	0	1	0	0	0	0.0165461
10711	276.085	2	0	1	0	0	0	0.0164564
10713	276.118	2	0	1	0	0	0	0.0165047
10715	276.152	2	0	1	0	0	0	0.0164723
10717	276.185	2	0	1	0	0	0	0.0164047
10719	276.218	2	0	1	0	0	0	0.0164814
10721	276.252	2	0	1	0	0	0	0.01652
10723	276.285	2	0	1	0	0	0	0.0165331
10725	276.318	2	0	1	0	0	0	0.0166131
10727	276.352	2	0	1	0	0	0	0.0166256
10729	276.385	2	0	1	0	0	0	0.0166506
10731	276.418	2	0	1	0	0	0	0.0166807
10733	276.452	2	0	1	0	0	0	0.0165978
10735	276.485	2	0	1	0	0	0	0.0166353
10737	276.518	2	0	1	0	0	0	0.0166381
10739	276.552	2	0	1	0	0	0	0.0166858
10741	276.585	2	0	1	0	0	0	0.0167432
10743	276.618	2	0	1	0	0	0	0.0167716
10745	276.652	2	0	1	0	0	0	0.0167807
10747	276.685	2	0	1	0	0	0	0.0167398
10749	276.718	2	0	1	0	0	0	0.016792
10751	276.752	2	0	1	0	0	0	0.0168102
10753	276.785	2	0	1	0	0	0	0.0168971
10755	276.818	2	0	1	0	0	0	0.0168687
10757	276.852	2	0	1	0	0	0	0.0168261
10759	276.885	2	0	1	0	0	0	0.0167858
10761	276.918	2	0	1	0	0	0	0.0167421
10763	276.952	2	0	1	0	0	0	0.0167086
10765	276.985	2	0	1	0	0	0	0.0166404
10767	277.018	2	0	1	0	0	0	0.0166535
10769	277.052	2	0	1	0	0	0	0.016541
10771	277.085	2	0	1	0	0	0	0.0166393
10773	277.118	2	0	1	0	0	0	0.0166279
10775	277.152	2	0	1	0	0	0	0.0165791
10777	277.185	2	0	1	0	0	0	0.0165047
10779	277.218	2	0	1	0	0	0	0.0165166
10781	277.252	2	0	1	0	0	0	0.016545
10783	277.285	2	0	1	0	0	0	0.0164933
10785	277.318	2	0	1	0	0	0	0.0164598
10787	277.352	2	0	1	0	0	0	0.0163627
10789	277.385	2	0	1	0	0	0	0.0164422
10791	277.418	2	0	1	0	0	0	0.016424
10793	277.452	2	0	1	0	0	0	0.0165007
10795	277.485	2	0	1	0	0	0	0.0164916
10797	277.518	2	0	1	0	0	0	0.0164263
10799	277.552	2	0	1	0	0	0	0.016503
10801	277.585	2	0	1	0	0	0	0.0164876
10803	277.618	2	0	1	0	0	0	0.0165109
10805	277.652	2	0	1	0	0	0	0.0164825
10807	277.685	2	0	1	0	0	0	0.0163973
10809	277.718	2	0	1	0	0	0	0.0164916
10811	277.752	2	0	1	0	0	0	0.0165495
10813	277.785	2	0	1	0	0	0	0.0164723
10815	277.818	2	0	1	0	0	0	0.0165478
10817	277.852	2	0	1	0	0	0	0.0165864
10819	277.885	2	0	1	0	0	0	0.0165467
10821	277.918	2	0	1	0	0	0	0.0165427
10823	277.952	2	0	1	0	0	0	0.0164831
10825	277.985	2	0	1	0	0	0	0.0165893
10827	278.018	2	0	1	0	0	0	0.016654
10829	278.052	2	0	1	0	0	0	0.0165813
10831	278.085	2	0	1	0	0	0	0.0166489
10833	278.118	2	0	1	0	0	0	0.0167296
10835	278.152	2	0	1	0	0	0	0.0166773
10837	278.185	2	0	1	0	0	0	0.016679
10839	278.218	2	0	1	0	0	0	0.0167267
10841	278.252	2	0	1	0	0	0	0.016712
10843	278.285	2	0	1	0	0	0	0.0167546
10845	278.318	2	0	1	0	0	0	0.0167489
10847	278.352	2	0	1	0	0	0	0.0166909
10849	278.385	2	0	1	0	0	0	0.0167489
10851	278.418	2	0	1	0	0	0	0.0167046
10853	278.452	2	0	1	0	0	0	0.0167943
10855	278.485	2	0	1	0	0	0	0.0167154
10857	278.518	2	0	1	0	0	0	0.016779
10859	278.552	2	0	1	0	0	0	0.0167648
10861	278.585	2	0	1	0	0	0	0.0167216
10863	278.618	2	0	1	0	0	0	0.0166824
10865	278.652	2	0	1	0	0	0	0.0166262
10867	278.685	2	0	1	0	0	0	0.0166773
10869	278.718	2	0	1	0	0	0	0.0165473
10871	278.752	2	0	1	0	0	0	0.0165779
10873	278.785	2	0	1	0	0	0	0.016499
10875	278.818	2	0	1	0	0	0	0.0164888
10877	278.852	2	0	1	0	0	0	0.0164996
10879	278.885	2	0	1	0	0	0	0.016524
10881	278.918	2	0	1	0	0	0	0.0164814
10883	278.952	2	0	1	0	0	0	0.0163985
10885	278.985	2	0	1	0	0	0	0.0163939
10887	279.018	2	0	1	0	0	0	0.016353
10889	279.052	2	0	1	0	0	0	0.0164229
10891	279.085	2	0	1	0	0	0	0.0163661
10893	279.118	2	0	1	0	0	0	0.0163916
10895	279.152	2	0	1	0	0	0	0.0163252
10897	279.185	2	0	1	0	0	0	0.0163508
10899	279.218	2	0	1	0	0	0	0.0164195
10901	279.252	2	0	1	0	0	0	0.0163638
10903	279.285	2	0	1	0	0	0	0.0163843
10905	279.318	2	0	1	0	0	0	0.0164189
10907	279.352	2	0	1	0	0	0	0.0164575
10909	279.385	2	0	1	0	0	0	0.0164615
10911	279.418	2	0	1	0	0	0	0.0165262
10913	279.452	2	0	1	0	0	0	0.0166018
10915	279.485	2	0	1	0	0	0	0.0165876
10917	279.518	2	0	1	0	0	0	0.0165456
10919	279.552	2	0	1	0	0	0	0.0165899
10921	279.585	2	0	1	0	0	0	0.0165944
10923	279.618	2	0	1	0	0	0	0.0166557
10925	279.652	2	0	1	0	0	0	0.0166694
10927	279.685	2	0	1	0	0	0	0.0166745
10929	279.718	2	0	1	0	0	0	0.0166779
10931	279.752	2	0	1	0	0	0	0.0166501
10933	279.785	2	0	1	0	0	0	0.0167483
10935	279.818	2	0	1	0	0	0	0.016675
10937	279.852	2	0	1	0	0	0	0.0166478
10939	279.885	2	0	1	0	0	0	0.0166523
10941	279.918	2	0	1	0	0	0	0.0166205
10943	279.952	2	0	1	0	0	0	0.0166586
10945	279.985	2	0	1	0	0	0	0.0166029
10947	280.018	2	0	1	0	0	0	0.0166694
10949	280.052	2	0	1	0	0	0	0.0166643
10951	280.085	2	0	1	0	0	0	0.0166376
10953	280.118	2	0	1	0	0	0	0.0166359
10955	280.152	2	0	1	0	0	0	0.0166705
10957	280.185	2	0	1	0	0	0	0.0166461
10959	280.218	2	0	1	0	0	0	0.0166404
10961	280.252	2	0	1	0	0	0	0.0166608
10963	280.285	2	0	1	0	0	0	0.0166881
10965	280.318	2	0	1	0	0	0	0.0166461
10967	280.352	2	0	1	0	0	0	0.0165882
10969	280.385	2	0	1	0	0	0	0.0165024
10971	280.418	2	0	1	0	0	0	0.0165081
10973	280.452	2	0	1	0	0	0	0.016449
10975	280.485	2	0	1	0	0	0	0.0164422
10977	280.518	2	0	1	0	0	0	0.0164587
10979	280.552	2	0	1	0	0	0	0.0164842
10981	280.585	2	0	1	0	0	0	0.0164774
10983	280.618	2	0	1	0	0	0	0.0164007
10985	280.652	2	0	1	0	0	0	0.0164513
10987	280.685	2	0	1	0	0	0	0.0165223
10989	280.718	2	0	1	0	0	0	0.0165126
10991	280.752	2	0	1	0	0	0	0.0164359
10993	280.785	2	0	1	0	0	0	0.0165007
10995	280.818	2	0	1	0	0	0	0.0164757
10997	280.852	2	0	1	0	0	0	0.0164916
10999	280.885	2	0	1	0	0	0	0.0164138
11001	280.918	2	0	1	0	0	0	0.0163951
11003	280.952	2	0	1	0	0	0	0.0163792
11005	280.985	2	0	1	0	0	0	0.0164956
11007	281.018	2	0	1	0	0	0	0.0164575
11009	281.052	2	0	1	0	0	0	0.016545
11011	281.085	2	0	1	0	0	0	0.0165007
11013	281.118	2	0	1	0	0	0	0.0165774
11015	281.152	2	0	1	0	0	0	0.01657
11017	281.185	2	0	1	0	0	0	0.016608
11019	281.218	2	0	1	0	0	0	0.0166001
11021	281.252	2	0	1	0	0	0	0.0165677
11023	281.285	2	0	1	0	0	0	0.0165774
11025	281.318	2	0	1	0	0	0	0.0165808
11027	281.352	2	0	1	0	0	0	0.0165836
11029	281.385	2	0	1	0	0	0	0.0166733
11031	281.418	2	0	1	0	0	0	0.0167273
11033	281.452	2	0	1	0	0	0	0.0167756
11035	281.485	2	0	1	0	0	0	0.01685
11037	281.518	2	0	1	0	0	0	0.0168324
11039	281.552	2	0	1	0	0	0	0.0169158
11041	281.585	2	0	1	0	0	0	0.016921
11043	281.618	2	0	1	0	0	0	0.0169704
11045	281.652	2	0	1	0	0	0	0.017009
11047	281.685	2	0	1	0	0	0	0.017034
11049	281.718	2	0	1	0	0	0	0.0170033
11051	281.752	2	0	1	0	0	0	0.0170328
11053	281.785	2	0	1	0	0	0	0.0170754
11055	281.818	2	0	1	0	0	0	0.0170595
11057	281.852	2	0	1	0	0	0	0.0170652
11059	281.885	2	0	1	0	0	0	0.0170101
11061	281.918	2	0	1	0	0	0	0.0169954
11063	281.952	2	0	1	0	0	0	0.0170283
11065	281.985	2	0	1	0	0	0	0.0169579
11067	282.018	2	0	1	0	0	0	0.0169403
11069	282.052	2	0	1	0	0	0	0.0168596
11071	282.085	2	0	1	0	0	0	0.0167756
11073	282.118	2	0	1	0	0	0	0.0167511
11075	282.152	2	0	1	0	0	0	0.0168051
11077	282.185	2	0	1	0	0	0	0.0167523
11079	282.218	2	0	1	0	0	0	0.0166217
11081	282.251	2	0	1	0	0	0	0.016616
11083	282.285	2	0	1	0	0	0	0.0165404
11085	282.318	2	0	1	0	0	0	0.0165399
11087	282.351	2	0	1	0	0	0	0.0166256
11089	282.385	2	0	1	0	0	0	0.016516
11091	282.418	2	0	1	0	0	0	0.0165132
11093	282.451	2	0	1	0	0	0	0.0164155
11095	282.485	2	0	1	0	0	0	0.0163951
11097	282.518	2	0	1	0	0	0	0.0164967
11099	282.551	2	0	1	0	0	0	0.016399
11101	282.585	2	0	1	0	0	0	0.0163905
11103	282.618	2	0	1	0	0	0	0.0165149
11105	282.651	2	0	1	0	0	0	0.0165353
11107	282.685	2	0	1	0	0	0	0.0165688
11109	282.718	2	0	1	0	0	0	0.0166205
11111	282.751	2	0	1	0	0	0	0.0165598
11113	282.785	2	0	1	0	0	0	0.016541
11115	282.818	2	0	1	0	0	0	0.0165995
11117	282.851	2	0	1	0	0	0	0.0165336
11119	282.885	2	0	1	0	0	0	0.0165342
11121	282.918	2	0	1	0	0	0	0.0164359
11123	282.951	2	0	1	0	0	0	0.0164564
11125	282.985	2	0	1	0	0	0	0.0164819
11127	283.018	2	0	1	0	0	0	0.0164717
11129	283.051	2	0	1	0	0	0	0.016545
11131	283.085	2	0	1	0	0	0	0.016541
11133	283.118	2	0	1	0	0	0	0.0165211
11135	283.151	2	0	1	0	0	0	0.0164842
11137	283.185	2	0	1	0	0	0	0.0164007
11139	283.218	2	0	1	0	0	0	0.0163667
11141	283.251	2	0	1	0	0	0	0.0163865
11143	283.285	2	0	1	0	0	0	0.0163854
11145	283.318	2	0	1	0	0	0	0.0163672
11147	283.351	2	0	1	0	0	0	0.0162996
11149	283.385	2	0	1	0	0	0	0.0162695
11151	283.418	2	0	1	0	0	0	0.0162605
11153	283.451	2	0	1	0	0	0	0.0162775
11155	283.485	2	0	1	0	0	0	0.0162826
11157	283.518	2	0	1	0	0	0	0.0162485
11159	283.551	2	0	1	0	0	0	0.0162088
11161	283.585	2	0	1	0	0	0	0.0161985
11163	283.618	2	0	1	0	0	0	0.0161821
11165	283.651	2	0	1	0	0	0	0.016165
11167	283.685	2	0	1	0	0	0	0.0161264
11169	283.718	2	0	1	0	0	0	0.0160759
11171	283.751	2	0	1	0	0	0	0.016081
11173	283.785	2	0	1	0	0	0	0.016131
11175	283.818	2	0	1	0	0	0	0.016119
11177	283.851	2	0	1	0	0	0	0.0160679
11179	283.885	2	0	1	0	0	0	0.0160781
11181	283.918	2	0	1	0	0	0	0.0160111
11183	283.951	2	0	1	0	0	0	0.0160043
11185	283.985	2	0	1	0	0	0	0.0160356
11187	284.018	2	0	1	0	0	0	0.0159333
11189	284.051	2	0	1	0	0	0	0.0160049
11191	284.085	2	0	1	0	0	0	0.0160066
11193	284.118	2	0	1	0	0	0	0.0159861
11195	284.151	2	0	1	0	0	0	0.0161111
11197	284.185	2	0	1	0	0	0	0.0161457
11199	284.218	2	0	1	0	0	0	0.0161815
11201	284.251	2	0	1	0	0	0	0.0162003
11203	284.285	2	0	1	0	0	0	0.0162076
11205	284.318	2	0	1	0	0	0	0.0161753
11207	284.351	2	0	1	0	0	0	0.0162309
11209	284.385	2	0	1	0	0	0	0.016236
11211	284.418	2	0	1	0	0	0	0.0162712
11213	284.451	2	0	1	0	0	0	0.0162991
11215	284.485	2	0	1	0	0	0	0.0163439
11217	284.518	2	0	1	0	0	0	0.0162627
11219	284.551	2	0	1	0	0	0	0.0162366
11221	284.585	2	0	1	0	0	0	0.0161667
11223	284.618	2	0	1	0	0	0	0.0161832
11225	284.651	2	0	1	0	0	0	0.0161259
11227	284.685	2	0	1	0	0	0	0.0161401
11229	284.718	2	0	1	0	0	0	0.0161781
11231	284.751	2	0	1	0	0	0	0.0161014
11233	284.785	2	0	1	0	0	0	0.0161321
11235	284.818	2	0	1	0	0	0	0.0160753
11237	284.851	2	0	1	0	0	0	0.0160236
11239	284.885	2	0	1	0	0	0	0.0159549
11241	284.918	2	0	1	0	0	0	0.0159748
11243	284.951	2	0	1	0	0	0	0.0159418
11245	284.985	2	0	1	0	0	0	0.0159839
11247	285.018	2	0	1	0	0	0	0.0158913
11249	285.051	2	0	1	0	0	0	0.0159623
11251	285.085	2	0	1	0	0	0	0.015943
11253	285.118	2	0	1	0	0	0	0.0159708
11255	285.151	2	0	1	0	0	0	0.0158992
11257	285.185	2	0	1	0	0	0	0.0158998
11259	285.218	2	0	1	0	0	0	0.0158538
11261	285.251	2	0	1	0	0	0	0.0158294
11263	285.285	2	0	1	0	0	0	0.0158612
11265	285.318	2	0	1	0	0	0	0.0158885
11267	285.351	2	0	1	0	0	0	0.0157715
11269	285.385	2	0	1	0	0	0	0.015784
11271	285.418	2	0	1	0	0	0	0.0158828
11273	285.451	2	0	1	0	0	0	0.0158498
11275	285.485	2	0	1	0	0	0	0.0158595
11277	285.518	2	0	1	0	0	0	0.0158777
11279	285.551	2	0	1	0	0	0	0.0159299
11281	285.585	2	0	1	0	0	0	0.0159572
11283	285.618	2	0	1	0	0	0	0.0159964
11285	285.651	2	0	1	0	0	0	0.016073
11287	285.685	2	0	1	0	0	0	0.0161298
11289	285.718	2	0	1	0	0	0	0.0161991
11291	285.751	2	0	1	0	0	0	0.0162338
11293	285.785	2	0	1	0	0	0	0.0162747
11295	285.818	2	0	1	0	0	0	0.0163195
11297	285.851	2	0	1	0	0	0	0.0163286
11299	285.885	2	0	1	0	0	0	0.0162758
11301	285.918	2	0	1	0	0	0	0.0163871
11303	285.951	2	0	1	0	0	0	0.0164291
11305	285.985	2	0	1	0	0	0	0.0164075
11307	286.018	2	0	1	0	0	0	0.0163939
11309	286.051	2	0	1	0	0	0	0.0164331
11311	286.085	2	0	1	0	0	0	0.0163956
11313	286.118	2	0	1	0	0	0	0.0163797
11315	286.151	2	0	1	0	0	0	0.0165365
11317	286.185	2	0	1	0	0	0	0.0165688
11319	286.218	2	0	1	0	0	0	0.0165529
11321	286.251	2	0	1	0	0	0	0.0166001
11323	286.285	2	0	1	0	0	0	0.0166711
11325	286.318	2	0	1	0	0	0	0.0166296
11327	286.351	2	0	1	0	0	0	0.016658
11329	286.385	2	0	1	0	0	0	0.0166881
11331	286.418	2	0	1	0	0	0	0.0166069
11333	286.451	2	0	1	0	0	0	0.0166239
11335	286.485	2	0	1	0	0	0	0.0166001
11337	286.518	2	0	1	0	0	0	0.0166041
11339	286.551	2	0	1	0	0	0	0.0166103
11341	286.585	2	0	1	0	0	0	0.0166342
11343	286.618	2	0	1	0	0	0	0.0166023
11345	286.651	2	0	1	0	0	0	0.0166239
11347	286.685	2	0	1	0	0	0	0.0166836
11349	286.718	2	0	1	0	0	0	0.0166739
11351	286.751	2	0	1	0	0	0	0.0166449
11353	286.785	2	0	1	0	0	0	0.0166677
11355	286.818	2	0	1	0	0	0	0.0166302
11357	286.851	2	0	1	0	0	0	0.0166194
11359	286.885	2	0	1	0	0	0	0.0166711
11361	286.918	2	0	1	0	0	0	0.0166381
11363	286.951	2	0	1	0	0	0	0.016612
11365	286.985	2	0	1	0	0	0	0.0165779
11367	287.018	2	0	1	0	0	0	0.0165149
11369	287.051	2	0	1	0	0	0	0.0165427
11371	287.085	2	0	1	0	0	0	0.016524
11373	287.118	2	0	1	0	0	0	0.0164729
11375	287.151	2	0	1	0	0	0	0.0164695
11377	287.185	2	0	1	0	0	0	0.0164683
11379	287.218	2	0	1	0	0	0	0.0165274
11381	287.251	2	0	1	0	0	0	0.0164819
11383	287.285	2	0	1	0	0	0	0.016457
11385	287.318	2	0	1	0	0	0	0.0164093
11387	287.351	2	0	1	0	0	0	0.0164382
11389	287.385	2	0	1	0	0	0	0.0164405
11391	287.418	2	0	1	0	0	0	0.0163542
11393	287.451	2	0	1	0	0	0	0.0163275
11395	287.485	2	0	1	0	0	0	0.016303
11397	287.518	2	0	1	0	0	0	0.0163292
11399	287.551	2	0	1	0	0	0	0.0163172
11401	287.585	2	0	1	0	0	0	0.0162531
11403	287.618	2	0	1	0	0	0	0.0162775
11405	287.651	2	0	1	0	0	0	0.0162758
11407	287.685	2	0	1	0	0	0	0.0163184
11409	287.718	2	0	1	0	0	0	0.016303
11411	287.751	2	0	1	0	0	0	0.0163224
11413	287.785	2	0	1	0	0	0	0.0163121
11415	287.818	2	0	1	0	0	0	0.0162809
11417	287.851	2	0	1	0	0	0	0.0162854
11419	287.885	2	0	1	0	0	0	0.0162951
11421	287.918	2	0	1	0	0	0	0.01624
11423	287.951	2	0	1	0	0	0	0.0162355
11425	287.985	2	0	1	0	0	0	0.0162428
11427	288.018	2	0	1	0	0	0	0.0162854
11429	288.051	2	0	1	0	0	0	0.0162372
11431	288.085	2	0	1	0	0	0	0.0163405
[truncated: 25,158 more rows]

## Sheet: Mouse_3_415_Signal
FrameCounter	Timestamp	LedState	Stimulation	Output0	Output1	Input0	Input1	Region0G
7428	533.955	1	0	1	0	0	0	0.0186503
7430	533.988	1	0	1	0	0	0	0.0186356
7432	534.021	1	0	1	0	0	0	0.0185534
7434	534.055	1	0	1	0	0	0	0.0185286
7436	534.088	1	0	1	0	0	0	0.0185265
7438	534.121	1	0	1	0	0	0	0.018478
7440	534.155	1	0	1	0	0	0	0.0184948
7442	534.188	1	0	1	0	0	0	0.0184714
7444	534.221	1	0	1	0	0	0	0.0185607
7446	534.255	1	0	1	0	0	0	0.0185411
7448	534.288	1	0	1	0	0	0	0.0183975
7450	534.321	1	0	1	0	0	0	0.0184093
7452	534.355	1	0	1	0	0	0	0.0185209
7454	534.388	1	0	1	0	0	0	0.0185725
7456	534.421	1	0	1	0	0	0	0.0184365
7458	534.455	1	0	1	0	0	0	0.0184222
7460	534.488	1	0	1	0	0	0	0.0185307
7462	534.521	1	0	1	0	0	0	0.0185359
7464	534.555	1	0	1	0	0	0	0.0185788
7466	534.588	1	0	1	0	0	0	0.0185202
7468	534.621	1	0	1	0	0	0	0.0185199
7470	534.655	1	0	1	0	0	0	0.0184606
7472	534.688	1	0	1	0	0	0	0.0185174
7474	534.721	1	0	1	0	0	0	0.0185146
7476	534.755	1	0	1	0	0	0	0.018454
7478	534.788	1	0	1	0	0	0	0.0184146
7480	534.821	1	0	1	0	0	0	0.0184986
7482	534.855	1	0	1	0	0	0	0.0185575
7484	534.888	1	0	1	0	0	0	0.018522
7486	534.921	1	0	1	0	0	0	0.0184285
7488	534.955	1	0	1	0	0	0	0.0184522
7490	534.988	1	0	1	0	0	0	0.0184745
7492	535.021	1	0	1	0	0	0	0.0185307
7494	535.055	1	0	1	0	0	0	0.0185652
7496	535.088	1	0	1	0	0	0	0.0185108
7498	535.121	1	0	1	0	0	0	0.0184651
7500	535.155	1	0	1	0	0	0	0.0184344
7502	535.188	1	0	1	0	0	0	0.0184951
7504	535.221	1	0	1	0	0	0	0.0184369
7506	535.255	1	0	1	0	0	0	0.0185049
7508	535.288	1	0	1	0	0	0	0.0184836
7510	535.321	1	0	1	0	0	0	0.0184236
7512	535.355	1	0	1	0	0	0	0.0185202
7514	535.388	1	0	1	0	0	0	0.0182433
7516	535.421	1	0	1	0	0	0	0.0181091
7518	535.455	1	0	1	0	0	0	0.0178964
7520	535.488	1	0	1	0	0	0	0.0175083
7522	535.521	1	0	1	0	0	0	0.0179996
7524	535.555	1	0	1	0	0	0	0.0178015
7526	535.588	1	0	1	0	0	0	0.0179787
7528	535.621	1	0	1	0	0	0	0.0180387
7530	535.655	1	0	1	0	0	0	0.018039
7532	535.688	1	0	1	0	0	0	0.0180076
7534	535.721	1	0	1	0	0	0	0.0179511
7536	535.755	1	0	1	0	0	0	0.0178531
7538	535.788	1	0	1	0	0	0	0.0179239
7540	535.821	1	0	1	0	0	0	0.017963
7542	535.855	1	0	1	0	0	0	0.0176136
7544	535.888	1	0	1	0	0	0	0.0175233
7546	535.921	1	0	1	0	0	0	0.0174542
7548	535.955	1	0	1	0	0	0	0.0175536
7550	535.988	1	0	1	0	0	0	0.0175445
7552	536.021	1	0	1	0	0	0	0.0175442
7554	536.055	1	0	1	0	0	0	0.0174835
7556	536.088	1	0	1	0	0	0	0.0174636
7558	536.121	1	0	1	0	0	0	0.0173388
7560	536.155	1	0	1	0	0	0	0.0173074
7562	536.188	1	0	1	0	0	0	0.0173845
7564	536.221	1	0	1	0	0	0	0.0174343
7566	536.254	1	0	1	0	0	0	0.017449
7568	536.288	1	0	1	0	0	0	0.0174176
7570	536.321	1	0	1	0	0	0	0.017548
7572	536.354	1	0	1	0	0	0	0.0174518
7574	536.388	1	0	1	0	0	0	0.0174577
7576	536.421	1	0	1	0	0	0	0.0173106
7578	536.454	1	0	1	0	0	0	0.0173186
7580	536.488	1	0	1	0	0	0	0.0172952
7582	536.521	1	0	1	0	0	0	0.0172537
7584	536.554	1	0	1	0	0	0	0.0171477
7586	536.588	1	0	1	0	0	0	0.017147
7588	536.621	1	0	1	0	0	0	0.0171442
7590	536.654	1	0	1	0	0	0	0.0171718
7592	536.688	1	0	1	0	0	0	0.0171536
7594	536.721	1	0	1	0	0	0	0.0174096
7596	536.754	1	0	1	0	0	0	0.0174162
7598	536.788	1	0	1	0	0	0	0.0173378
7600	536.821	1	0	1	0	0	0	0.0173712
7602	536.854	1	0	1	0	0	0	0.0174469
7604	536.888	1	0	1	0	0	0	0.0176157
7606	536.921	1	0	1	0	0	0	0.0176631
7608	536.954	1	0	1	0	0	0	0.0177049
7610	536.988	1	0	1	0	0	0	0.017668
7612	537.021	1	0	1	0	0	0	0.0174992
7614	537.054	1	0	1	0	0	0	0.0175051
7616	537.088	1	0	1	0	0	0	0.0174696
7618	537.121	1	0	1	0	0	0	0.0173744
7620	537.154	1	0	1	0	0	0	0.017223
7622	537.188	1	0	1	0	0	0	0.0172596
7624	537.221	1	0	1	0	0	0	0.0172635
7626	537.254	1	0	1	0	0	0	0.0171624
7628	537.288	1	0	1	0	0	0	0.0170616
7630	537.321	1	0	1	0	0	0	0.0171885
7632	537.354	1	0	1	0	0	0	0.0172879
7634	537.388	1	0	1	0	0	0	0.0172694
7636	537.421	1	0	1	0	0	0	0.0173657
7638	537.454	1	0	1	0	0	0	0.0171909
7640	537.488	1	0	1	0	0	0	0.0171418
7642	537.521	1	0	1	0	0	0	0.0172304
7644	537.554	1	0	1	0	0	0	0.0172722
7646	537.588	1	0	1	0	0	0	0.0171676
7648	537.621	1	0	1	0	0	0	0.0170201
7650	537.654	1	0	1	0	0	0	0.016912
7652	537.688	1	0	1	0	0	0	0.016889
7654	537.721	1	0	1	0	0	0	0.0168468
7656	537.754	1	0	1	0	0	0	0.0170006
7658	537.788	1	0	1	0	0	0	0.0170996
7660	537.821	1	0	1	0	0	0	0.0170061
7662	537.854	1	0	1	0	0	0	0.0170588
7664	537.888	1	0	1	0	0	0	0.0171414
7666	537.921	1	0	1	0	0	0	0.0174148
7668	537.954	1	0	1	0	0	0	0.017502
7670	537.988	1	0	1	0	0	0	0.0176603
7672	538.021	1	0	1	0	0	0	0.0175955
7674	538.054	1	0	1	0	0	0	0.0176453
7676	538.088	1	0	1	0	0	0	0.0176711
7678	538.121	1	0	1	0	0	0	0.0174347
7680	538.154	1	0	1	0	0	0	0.0173915
7682	538.188	1	0	1	0	0	0	0.017185
7684	538.221	1	0	1	0	0	0	0.0171512
7686	538.254	1	0	1	0	0	0	0.0170839
7688	538.288	1	0	1	0	0	0	0.0170623
7690	538.321	1	0	1	0	0	0	0.0171606
7692	538.354	1	0	1	0	0	0	0.0171456
7694	538.388	1	0	1	0	0	0	0.017139
7696	538.421	1	0	1	0	0	0	0.0172014
7698	538.454	1	0	1	0	0	0	0.0169992
7700	538.488	1	0	1	0	0	0	0.0170009
7702	538.521	1	0	1	0	0	0	0.0169155
7704	538.554	1	0	1	0	0	0	0.0168408
7706	538.588	1	0	1	0	0	0	0.0168485
7708	538.621	1	0	1	0	0	0	0.0168994
7710	538.654	1	0	1	0	0	0	0.0168747
7712	538.688	1	0	1	0	0	0	0.0168869
7714	538.721	1	0	1	0	0	0	0.0169068
7716	538.754	1	0	1	0	0	0	0.0169238
7718	538.788	1	0	1	0	0	0	0.016936
7720	538.821	1	0	1	0	0	0	0.0169081
7722	538.854	1	0	1	0	0	0	0.0169343
7724	538.888	1	0	1	0	0	0	0.0169472
7726	538.921	1	0	1	0	0	0	0.0169528
7728	538.954	1	0	1	0	0	0	0.0169584
7730	538.988	1	0	1	0	0	0	0.0170919
7732	539.021	1	0	1	0	0	0	0.0172649
7734	539.054	1	0	1	0	0	0	0.0174389
7736	539.088	1	0	1	0	0	0	0.017403
7738	539.121	1	0	1	0	0	0	0.0173705
7740	539.154	1	0	1	0	0	0	0.0173956
7742	539.188	1	0	1	0	0	0	0.017684
7744	539.221	1	0	1	0	0	0	0.0177419
7746	539.254	1	0	1	0	0	0	0.0176736
7748	539.288	1	0	1	0	0	0	0.0174915
7750	539.321	1	0	1	0	0	0	0.0174741
7752	539.354	1	0	1	0	0	0	0.0172143
7754	539.388	1	0	1	0	0	0	0.017222
7756	539.421	1	0	1	0	0	0	0.0172994
7758	539.454	1	0	1	0	0	0	0.0172363
7760	539.488	1	0	1	0	0	0	0.0172073
7762	539.521	1	0	1	0	0	0	0.0171236
7764	539.554	1	0	1	0	0	0	0.0171027
7766	539.588	1	0	1	0	0	0	0.0170239
7768	539.621	1	0	1	0	0	0	0.0169744
7770	539.654	1	0	1	0	0	0	0.0169584
7772	539.688	1	0	1	0	0	0	0.0169796
7774	539.721	1	0	1	0	0	0	0.0170888
7776	539.754	1	0	1	0	0	0	0.0171128
7778	539.788	1	0	1	0	0	0	0.0171749
7780	539.821	1	0	1	0	0	0	0.0171345
7782	539.854	1	0	1	0	0	0	0.0172551
7784	539.888	1	0	1	0	0	0	0.0171076
7786	539.921	1	0	1	0	0	0	0.0170947
7788	539.954	1	0	1	0	0	0	0.017094
7790	539.988	1	0	1	0	0	0	0.0170951
7792	540.021	1	0	1	0	0	0	0.0170985
7794	540.054	1	0	1	0	0	0	0.0170933
7796	540.088	1	0	1	0	0	0	0.0170912
7798	540.121	1	0	1	0	0	0	0.017223
7800	540.154	1	0	1	0	0	0	0.0173339
7802	540.188	1	0	1	0	0	0	0.0176429
7804	540.221	1	0	1	0	0	0	0.0175044
7806	540.254	1	0	1	0	0	0	0.0172882
7808	540.288	1	0	1	0	0	0	0.0171488
7810	540.321	1	0	1	0	0	0	0.0169908
7812	540.354	1	0	1	0	0	0	0.0170944
7814	540.388	1	0	1	0	0	0	0.0172143
7816	540.421	1	0	1	0	0	0	0.017412
7818	540.454	1	0	1	0	0	0	0.0175149
7820	540.488	1	0	1	0	0	0	0.0175285
7822	540.521	1	0	1	0	0	0	0.0173848
7824	540.554	1	0	1	0	0	0	0.0174389
7826	540.588	1	0	1	0	0	0	0.0173883
7828	540.621	1	0	1	0	0	0	0.0174263
7830	540.654	1	0	1	0	0	0	0.0174476
7832	540.688	1	0	1	0	0	0	0.0175166
7834	540.721	1	0	1	0	0	0	0.0174839
7836	540.754	1	0	1	0	0	0	0.0174539
7838	540.788	1	0	1	0	0	0	0.0175832
7840	540.821	1	0	1	0	0	0	0.0177468
7842	540.854	1	0	1	0	0	0	0.0179197
7844	540.888	1	0	1	0	0	0	0.0177231
7846	540.921	1	0	1	0	0	0	0.0177213
7848	540.954	1	0	1	0	0	0	0.0176136
7850	540.988	1	0	1	0	0	0	0.017434
7852	541.021	1	0	1	0	0	0	0.0173723
7854	541.054	1	0	1	0	0	0	0.017101
7856	541.088	1	0	1	0	0	0	0.0169845
7858	541.121	1	0	1	0	0	0	0.0168426
7860	541.154	1	0	1	0	0	0	0.0168192
7862	541.188	1	0	1	0	0	0	0.0169312
7864	541.221	1	0	1	0	0	0	0.0170891
7866	541.254	1	0	1	0	0	0	0.0171704
7868	541.288	1	0	1	0	0	0	0.0171498
7870	541.321	1	0	1	0	0	0	0.0172014
7872	541.354	1	0	1	0	0	0	0.0173493
7874	541.388	1	0	1	0	0	0	0.0173046
7876	541.421	1	0	1	0	0	0	0.0171648
7878	541.454	1	0	1	0	0	0	0.0171519
7880	541.488	1	0	1	0	0	0	0.0169685
7882	541.521	1	0	1	0	0	0	0.0169451
7884	541.554	1	0	1	0	0	0	0.0167512
7886	541.588	1	0	1	0	0	0	0.0169427
7888	541.621	1	0	1	0	0	0	0.0169646
7890	541.654	1	0	1	0	0	0	0.0168729
7892	541.688	1	0	1	0	0	0	0.0168576
7894	541.721	1	0	1	0	0	0	0.0169598
7896	541.754	1	0	1	0	0	0	0.0170033
7898	541.788	1	0	1	0	0	0	0.0170337
7900	541.821	1	0	1	0	0	0	0.0172007
7902	541.854	1	0	1	0	0	0	0.0172687
7904	541.888	1	0	1	0	0	0	0.0174514
7906	541.921	1	0	1	0	0	0	0.0176628
7908	541.954	1	0	1	0	0	0	0.0176586
7910	541.988	1	0	1	0	0	0	0.0175683
7912	542.021	1	0	1	0	0	0	0.017314
7914	542.054	1	0	1	0	0	0	0.0170808
7916	542.088	1	0	1	0	0	0	0.0172854
7918	542.121	1	0	1	0	0	0	0.0171808
7920	542.154	1	0	1	0	0	0	0.0170832
7922	542.188	1	0	1	0	0	0	0.0170019
7924	542.221	1	0	1	0	0	0	0.0169936
7926	542.254	1	0	1	0	0	0	0.0168708
7928	542.288	1	0	1	0	0	0	0.0170246
7930	542.321	1	0	1	0	0	0	0.0171313
7932	542.354	1	0	1	0	0	0	0.0169657
7934	542.388	1	0	1	0	0	0	0.0168729
7936	542.421	1	0	1	0	0	0	0.0169434
7938	542.454	1	0	1	0	0	0	0.0171038
7940	542.488	1	0	1	0	0	0	0.0171488
7942	542.521	1	0	1	0	0	0	0.0170298
7944	542.554	1	0	1	0	0	0	0.0169716
7946	542.588	1	0	1	0	0	0	0.016981
7948	542.621	1	0	1	0	0	0	0.0170706
7950	542.654	1	0	1	0	0	0	0.0171132
7952	542.688	1	0	1	0	0	0	0.0170407
7954	542.721	1	0	1	0	0	0	0.0170584
7956	542.754	1	0	1	0	0	0	0.0170703
7958	542.788	1	0	1	0	0	0	0.0170647
7960	542.821	1	0	1	0	0	0	0.0170958
7962	542.854	1	0	1	0	0	0	0.0172084
7964	542.888	1	0	1	0	0	0	0.0172391
7966	542.921	1	0	1	0	0	0	0.0171742
7968	542.954	1	0	1	0	0	0	0.0172014
7970	542.988	1	0	1	0	0	0	0.0173416
7972	543.021	1	0	1	0	0	0	0.0174312
7974	543.054	1	0	1	0	0	0	0.0176206
7976	543.088	1	0	1	0	0	0	0.0176118
7978	543.121	1	0	1	0	0	0	0.0176927
7980	543.154	1	0	1	0	0	0	0.017706
7982	543.188	1	0	1	0	0	0	0.017676
7984	543.221	1	0	1	0	0	0	0.0176432
7986	543.254	1	0	1	0	0	0	0.0174943
7988	543.288	1	0	1	0	0	0	0.0175254
7990	543.321	1	0	1	0	0	0	0.0176593
7992	543.354	1	0	1	0	0	0	0.0176903
7994	543.388	1	0	1	0	0	0	0.0176324
7996	543.421	1	0	1	0	0	0	0.0175522
7998	543.454	1	0	1	0	0	0	0.0175662
8000	543.488	1	0	1	0	0	0	0.017487
8002	543.521	1	0	1	0	0	0	0.0174452
8004	543.554	1	0	1	0	0	0	0.017388
8006	543.588	1	0	1	0	0	0	0.0173636
8008	543.621	1	0	1	0	0	0	0.0173412
8010	543.654	1	0	1	0	0	0	0.0173196
8012	543.688	1	0	1	0	0	0	0.0172635
8014	543.721	1	0	1	0	0	0	0.0172171
8016	543.754	1	0	1	0	0	0	0.0171107
8018	543.788	1	0	1	0	0	0	0.017124
8020	543.821	1	0	1	0	0	0	0.0170849
8022	543.854	1	0	1	0	0	0	0.0168869
8024	543.888	1	0	1	0	0	0	0.0169768
8026	543.921	1	0	1	0	0	0	0.017063
8028	543.954	1	0	1	0	0	0	0.0170808
8030	543.988	1	0	1	0	0	0	0.0169193
8032	544.021	1	0	1	0	0	0	0.0169326
8034	544.054	1	0	1	0	0	0	0.0169071
8036	544.088	1	0	1	0	0	0	0.0168886
8038	544.121	1	0	1	0	0	0	0.0169967
8040	544.154	1	0	1	0	0	0	0.0170832
8042	544.188	1	0	1	0	0	0	0.0170427
8044	544.221	1	0	1	0	0	0	0.0169856
8046	544.254	1	0	1	0	0	0	0.0169974
8048	544.288	1	0	1	0	0	0	0.0171062
8050	544.321	1	0	1	0	0	0	0.0170414
8052	544.354	1	0	1	0	0	0	0.0169249
8054	544.388	1	0	1	0	0	0	0.016867
8056	544.421	1	0	1	0	0	0	0.01704
8058	544.454	1	0	1	0	0	0	0.0171174
8060	544.488	1	0	1	0	0	0	0.0171484
8062	544.521	1	0	1	0	0	0	0.0173995
8064	544.554	1	0	1	0	0	0	0.0173643
8066	544.588	1	0	1	0	0	0	0.0172593
8068	544.621	1	0	1	0	0	0	0.0171421
8070	544.654	1	0	1	0	0	0	0.0171512
8072	544.688	1	0	1	0	0	0	0.0175233
8074	544.721	1	0	1	0	0	0	0.0175749
8076	544.754	1	0	1	0	0	0	0.017441
8078	544.787	1	0	1	0	0	0	0.0174706
8080	544.821	1	0	1	0	0	0	0.017494
8082	544.854	1	0	1	0	0	0	0.0175536
8084	544.887	1	0	1	0	0	0	0.0177437
8086	544.921	1	0	1	0	0	0	0.017796
8088	544.954	1	0	1	0	0	0	0.0176969
8090	544.987	1	0	1	0	0	0	0.017713
8092	545.021	1	0	1	0	0	0	0.0176111
8094	545.054	1	0	1	0	0	0	0.0173231
8096	545.087	1	0	1	0	0	0	0.0171773
8098	545.121	1	0	1	0	0	0	0.0170023
8100	545.154	1	0	1	0	0	0	0.017064
8102	545.187	1	0	1	0	0	0	0.0170794
8104	545.221	1	0	1	0	0	0	0.0171585
8106	545.254	1	0	1	0	0	0	0.0171449
8108	545.287	1	0	1	0	0	0	0.0169646
8110	545.321	1	0	1	0	0	0	0.0169409
8112	545.354	1	0	1	0	0	0	0.0169817
8114	545.387	1	0	1	0	0	0	0.0171209
8116	545.421	1	0	1	0	0	0	0.0172523
8118	545.454	1	0	1	0	0	0	0.0171665
8120	545.487	1	0	1	0	0	0	0.016951
8122	545.521	1	0	1	0	0	0	0.0170543
8124	545.554	1	0	1	0	0	0	0.01704
8126	545.587	1	0	1	0	0	0	0.0172248
8128	545.621	1	0	1	0	0	0	0.0172725
8130	545.654	1	0	1	0	0	0	0.017328
8132	545.687	1	0	1	0	0	0	0.0171972
8134	545.721	1	0	1	0	0	0	0.0171264
8136	545.754	1	0	1	0	0	0	0.0171268
8138	545.787	1	0	1	0	0	0	0.0172502
8140	545.821	1	0	1	0	0	0	0.0172488
8142	545.854	1	0	1	0	0	0	0.0172415
8144	545.887	1	0	1	0	0	0	0.0170626
8146	545.921	1	0	1	0	0	0	0.0171177
8148	545.954	1	0	1	0	0	0	0.0172555
8150	545.987	1	0	1	0	0	0	0.0175107
8152	546.021	1	0	1	0	0	0	0.0175763
8154	546.054	1	0	1	0	0	0	0.0173242
8156	546.087	1	0	1	0	0	0	0.0171592
8158	546.121	1	0	1	0	0	0	0.0171428
8160	546.154	1	0	1	0	0	0	0.0173772
8162	546.187	1	0	1	0	0	0	0.0175996
8164	546.221	1	0	1	0	0	0	0.0176554
8166	546.254	1	0	1	0	0	0	0.0176404
8168	546.287	1	0	1	0	0	0	0.0174138
8170	546.321	1	0	1	0	0	0	0.0172952
8172	546.354	1	0	1	0	0	0	0.0171679
8174	546.387	1	0	1	0	0	0	0.0172066
8176	546.421	1	0	1	0	0	0	0.0171798
8178	546.454	1	0	1	0	0	0	0.0171453
8180	546.487	1	0	1	0	0	0	0.0170783
8182	546.521	1	0	1	0	0	0	0.0170462
8184	546.554	1	0	1	0	0	0	0.0170895
8186	546.587	1	0	1	0	0	0	0.0170853
8188	546.621	1	0	1	0	0	0	0.0170204
8190	546.654	1	0	1	0	0	0	0.0170211
8192	546.687	1	0	1	0	0	0	0.0170448
8194	546.721	1	0	1	0	0	0	0.0171484
8196	546.754	1	0	1	0	0	0	0.0171672
8198	546.787	1	0	1	0	0	0	0.0171114
8200	546.821	1	0	1	0	0	0	0.0169528
8202	546.854	1	0	1	0	0	0	0.0168586
8204	546.887	1	0	1	0	0	0	0.0170459
8206	546.921	1	0	1	0	0	0	0.0171969
8208	546.954	1	0	1	0	0	0	0.0173433
8210	546.987	1	0	1	0	0	0	0.017525
8212	547.021	1	0	1	0	0	0	0.0175606
8214	547.054	1	0	1	0	0	0	0.0174134
8216	547.087	1	0	1	0	0	0	0.0174382
8218	547.121	1	0	1	0	0	0	0.0178922
8220	547.154	1	0	1	0	0	0	0.0179797
8222	547.187	1	0	1	0	0	0	0.0179651
8224	547.221	1	0	1	0	0	0	0.0179557
8226	547.254	1	0	1	0	0	0	0.0178734
8228	547.287	1	0	1	0	0	0	0.0177356
8230	547.321	1	0	1	0	0	0	0.0174779
8232	547.354	1	0	1	0	0	0	0.017299
8234	547.387	1	0	1	0	0	0	0.0172691
8236	547.421	1	0	1	0	0	0	0.0171585
8238	547.454	1	0	1	0	0	0	0.0173737
8240	547.487	1	0	1	0	0	0	0.0173935
8242	547.521	1	0	1	0	0	0	0.0172558
8244	547.554	1	0	1	0	0	0	0.0171425
8246	547.587	1	0	1	0	0	0	0.0171899
8248	547.621	1	0	1	0	0	0	0.0174413
8250	547.654	1	0	1	0	0	0	0.0176404
8252	547.687	1	0	1	0	0	0	0.0176178
8254	547.721	1	0	1	0	0	0	0.0174856
8256	547.754	1	0	1	0	0	0	0.0172045
8258	547.787	1	0	1	0	0	0	0.0173081
8260	547.821	1	0	1	0	0	0	0.0173433
8262	547.854	1	0	1	0	0	0	0.0173416
8264	547.887	1	0	1	0	0	0	0.0173266
8266	547.921	1	0	1	0	0	0	0.0171725
8268	547.954	1	0	1	0	0	0	0.0171205
8270	547.987	1	0	1	0	0	0	0.0170776
8272	548.021	1	0	1	0	0	0	0.0171226
8274	548.054	1	0	1	0	0	0	0.0171885
8276	548.087	1	0	1	0	0	0	0.0171087
8278	548.121	1	0	1	0	0	0	0.0171495
8280	548.154	1	0	1	0	0	0	0.0171432
8282	548.187	1	0	1	0	0	0	0.0172028
8284	548.221	1	0	1	0	0	0	0.0172481
8286	548.254	1	0	1	0	0	0	0.0171868
8288	548.287	1	0	1	0	0	0	0.0172405
8290	548.321	1	0	1	0	0	0	0.0171739
8292	548.354	1	0	1	0	0	0	0.0170881
8294	548.387	1	0	1	0	0	0	0.0170173
8296	548.421	1	0	1	0	0	0	0.0169109
8298	548.454	1	0	1	0	0	0	0.0170692
8300	548.487	1	0	1	0	0	0	0.0171156
8302	548.521	1	0	1	0	0	0	0.0172502
8304	548.554	1	0	1	0	0	0	0.0173339
8306	548.587	1	0	1	0	0	0	0.017418
8308	548.621	1	0	1	0	0	0	0.017494
8310	548.654	1	0	1	0	0	0	0.0176192
8312	548.687	1	0	1	0	0	0	0.017654
8314	548.721	1	0	1	0	0	0	0.017563
8316	548.754	1	0	1	0	0	0	0.0175975
8318	548.787	1	0	1	0	0	0	0.0176474
8320	548.821	1	0	1	0	0	0	0.0174748
8322	548.854	1	0	1	0	0	0	0.0173409
8324	548.887	1	0	1	0	0	0	0.0173057
8326	548.921	1	0	1	0	0	0	0.0172837
8328	548.954	1	0	1	0	0	0	0.0173099
8330	548.987	1	0	1	0	0	0	0.0171027
8332	549.021	1	0	1	0	0	0	0.0169929
8334	549.054	1	0	1	0	0	0	0.0170658
8336	549.087	1	0	1	0	0	0	0.0170835
8338	549.121	1	0	1	0	0	0	0.0171847
8340	549.154	1	0	1	0	0	0	0.0173398
8342	549.187	1	0	1	0	0	0	0.0175665
8344	549.221	1	0	1	0	0	0	0.0176607
8346	549.254	1	0	1	0	0	0	0.0174567
8348	549.287	1	0	1	0	0	0	0.0174235
8350	549.321	1	0	1	0	0	0	0.0173294
8352	549.354	1	0	1	0	0	0	0.0174141
8354	549.387	1	0	1	0	0	0	0.0173601
8356	549.421	1	0	1	0	0	0	0.0172959
8358	549.454	1	0	1	0	0	0	0.0172175
8360	549.487	1	0	1	0	0	0	0.0170619
8362	549.521	1	0	1	0	0	0	0.0171031
8364	549.554	1	0	1	0	0	0	0.0171191
8366	549.587	1	0	1	0	0	0	0.0170532
8368	549.621	1	0	1	0	0	0	0.0171529
8370	549.654	1	0	1	0	0	0	0.0172293
8372	549.687	1	0	1	0	0	0	0.0174699
8374	549.721	1	0	1	0	0	0	0.0175961
8376	549.754	1	0	1	0	0	0	0.0174504
8378	549.787	1	0	1	0	0	0	0.0173869
8380	549.821	1	0	1	0	0	0	0.0171882
8382	549.854	1	0	1	0	0	0	0.0172408
8384	549.887	1	0	1	0	0	0	0.0172607
8386	549.921	1	0	1	0	0	0	0.0171627
8388	549.954	1	0	1	0	0	0	0.0171076
8390	549.987	1	0	1	0	0	0	0.0170089
8392	550.021	1	0	1	0	0	0	0.0170522
8394	550.054	1	0	1	0	0	0	0.017093
8396	550.087	1	0	1	0	0	0	0.0170755
8398	550.121	1	0	1	0	0	0	0.0170155
8400	550.154	1	0	1	0	0	0	0.0170748
8402	550.187	1	0	1	0	0	0	0.017064
8404	550.221	1	0	1	0	0	0	0.0170951
8406	550.254	1	0	1	0	0	0	0.0169779
8408	550.287	1	0	1	0	0	0	0.0170563
8410	550.321	1	0	1	0	0	0	0.0170427
8412	550.354	1	0	1	0	0	0	0.0171348
8414	550.387	1	0	1	0	0	0	0.0171791
8416	550.421	1	0	1	0	0	0	0.0172701
8418	550.454	1	0	1	0	0	0	0.0173929
8420	550.487	1	0	1	0	0	0	0.0172844
8422	550.521	1	0	1	0	0	0	0.0173754
8424	550.554	1	0	1	0	0	0	0.0176282
8426	550.587	1	0	1	0	0	0	0.0176174
8428	550.621	1	0	1	0	0	0	0.0173657
8430	550.654	1	0	1	0	0	0	0.0171564
8432	550.687	1	0	1	0	0	0	0.0170553
8434	550.721	1	0	1	0	0	0	0.0169957
8436	550.754	1	0	1	0	0	0	0.0169678
8438	550.787	1	0	1	0	0	0	0.0170999
8440	550.821	1	0	1	0	0	0	0.0171163
8442	550.854	1	0	1	0	0	0	0.0171247
8444	550.887	1	0	1	0	0	0	0.0170832
8446	550.921	1	0	1	0	0	0	0.0170511
8448	550.954	1	0	1	0	0	0	0.0170333
8450	550.987	1	0	1	0	0	0	0.0170204
8452	551.021	1	0	1	0	0	0	0.0170661
8454	551.054	1	0	1	0	0	0	0.0170452
8456	551.087	1	0	1	0	0	0	0.0169022
8458	551.121	1	0	1	0	0	0	0.0167422
8460	551.154	1	0	1	0	0	0	0.0166613
8462	551.187	1	0	1	0	0	0	0.0170818
8464	551.221	1	0	1	0	0	0	0.0174092
8466	551.254	1	0	1	0	0	0	0.0174947
8468	551.287	1	0	1	0	0	0	0.0176893
8470	551.321	1	0	1	0	0	0	0.0177168
8472	551.354	1	0	1	0	0	0	0.0175902
8474	551.387	1	0	1	0	0	0	0.0173496
8476	551.421	1	0	1	0	0	0	0.0173611
8478	551.454	1	0	1	0	0	0	0.0175299
8480	551.487	1	0	1	0	0	0	0.017586
8482	551.521	1	0	1	0	0	0	0.017609
8484	551.554	1	0	1	0	0	0	0.0173011
8486	551.587	1	0	1	0	0	0	0.0173088
8488	551.621	1	0	1	0	0	0	0.0173276
8490	551.654	1	0	1	0	0	0	0.01726
8492	551.687	1	0	1	0	0	0	0.0173845
8494	551.721	1	0	1	0	0	0	0.0174476
8496	551.754	1	0	1	0	0	0	0.0174657
8498	551.787	1	0	1	0	0	0	0.0176181
8500	551.821	1	0	1	0	0	0	0.0178409
8502	551.854	1	0	1	0	0	0	0.0178169
8504	551.887	1	0	1	0	0	0	0.0178402
8506	551.921	1	0	1	0	0	0	0.0178057
8508	551.954	1	0	1	0	0	0	0.0177423
8510	551.987	1	0	1	0	0	0	0.017502
8512	552.021	1	0	1	0	0	0	0.0173161
8514	552.054	1	0	1	0	0	0	0.0173053
8516	552.087	1	0	1	0	0	0	0.0171871
8518	552.121	1	0	1	0	0	0	0.0172764
8520	552.154	1	0	1	0	0	0	0.0174703
8522	552.187	1	0	1	0	0	0	0.0173604
8524	552.221	1	0	1	0	0	0	0.0173514
8526	552.254	1	0	1	0	0	0	0.0173088
8528	552.287	1	0	1	0	0	0	0.017456
8530	552.321	1	0	1	0	0	0	0.0173946
8532	552.354	1	0	1	0	0	0	0.0172168
8534	552.387	1	0	1	0	0	0	0.017072
8536	552.421	1	0	1	0	0	0	0.0169095
8538	552.454	1	0	1	0	0	0	0.0170061
8540	552.487	1	0	1	0	0	0	0.0171976
8542	552.521	1	0	1	0	0	0	0.0172244
8544	552.554	1	0	1	0	0	0	0.0173946
8546	552.587	1	0	1	0	0	0	0.0173242
8548	552.621	1	0	1	0	0	0	0.017034
8550	552.654	1	0	1	0	0	0	0.0170323
8552	552.687	1	0	1	0	0	0	0.0171128
8554	552.721	1	0	1	0	0	0	0.0172436
8556	552.754	1	0	1	0	0	0	0.0172213
8558	552.787	1	0	1	0	0	0	0.0170881
8560	552.821	1	0	1	0	0	0	0.017131
8562	552.854	1	0	1	0	0	0	0.0172656
8564	552.887	1	0	1	0	0	0	0.0173852
8566	552.921	1	0	1	0	0	0	0.0174117
8568	552.954	1	0	1	0	0	0	0.0172813
8570	552.987	1	0	1	0	0	0	0.0171289
8572	553.021	1	0	1	0	0	0	0.0171003
8574	553.054	1	0	1	0	0	0	0.0172136
8576	553.087	1	0	1	0	0	0	0.0171631
8578	553.121	1	0	1	0	0	0	0.0172035
8580	553.154	1	0	1	0	0	0	0.0172701
8582	553.187	1	0	1	0	0	0	0.0170706
8584	553.221	1	0	1	0	0	0	0.0169939
8586	553.254	1	0	1	0	0	0	0.0171756
8588	553.287	1	0	1	0	0	0	0.017283
8590	553.32	1	0	1	0	0	0	0.0175585
8592	553.354	1	0	1	0	0	0	0.017721
8594	553.387	1	0	1	0	0	0	0.0178741
8596	553.42	1	0	1	0	0	0	0.0179051
8598	553.454	1	0	1	0	0	0	0.0178015
8600	553.487	1	0	1	0	0	0	0.0177063
8602	553.52	1	0	1	0	0	0	0.0178856
8604	553.554	1	0	1	0	0	0	0.0179163
8606	553.587	1	0	1	0	0	0	0.0176837
8608	553.62	1	0	1	0	0	0	0.0174277
8610	553.654	1	0	1	0	0	0	0.0173161
8612	553.687	1	0	1	0	0	0	0.0173723
8614	553.72	1	0	1	0	0	0	0.017283
8616	553.754	1	0	1	0	0	0	0.0172216
8618	553.787	1	0	1	0	0	0	0.017343
8620	553.82	1	0	1	0	0	0	0.0176164
8622	553.854	1	0	1	0	0	0	0.017669
8624	553.887	1	0	1	0	0	0	0.0176589
8626	553.92	1	0	1	0	0	0	0.0174926
8628	553.954	1	0	1	0	0	0	0.0172464
8630	553.987	1	0	1	0	0	0	0.0173447
8632	554.02	1	0	1	0	0	0	0.0172736
8634	554.054	1	0	1	0	0	0	0.017184
8636	554.087	1	0	1	0	0	0	0.0171787
8638	554.12	1	0	1	0	0	0	0.0172171
8640	554.154	1	0	1	0	0	0	0.0172778
8642	554.187	1	0	1	0	0	0	0.0171819
8644	554.22	1	0	1	0	0	0	0.0172178
8646	554.254	1	0	1	0	0	0	0.017238
8648	554.287	1	0	1	0	0	0	0.0172234
8650	554.32	1	0	1	0	0	0	0.0171885
8652	554.354	1	0	1	0	0	0	0.0171805
8654	554.387	1	0	1	0	0	0	0.0171637
8656	554.42	1	0	1	0	0	0	0.0170958
8658	554.454	1	0	1	0	0	0	0.0169744
8660	554.487	1	0	1	0	0	0	0.0170581
8662	554.52	1	0	1	0	0	0	0.0171637
8664	554.554	1	0	1	0	0	0	0.0172426
8666	554.587	1	0	1	0	0	0	0.0171882
8668	554.62	1	0	1	0	0	0	0.0171669
8670	554.654	1	0	1	0	0	0	0.0172345
8672	554.687	1	0	1	0	0	0	0.017268
8674	554.72	1	0	1	0	0	0	0.017298
8676	554.754	1	0	1	0	0	0	0.0173231
8678	554.787	1	0	1	0	0	0	0.0172645
8680	554.82	1	0	1	0	0	0	0.0173339
8682	554.854	1	0	1	0	0	0	0.0172213
8684	554.887	1	0	1	0	0	0	0.0172422
8686	554.92	1	0	1	0	0	0	0.017261
8688	554.954	1	0	1	0	0	0	0.0171909
8690	554.987	1	0	1	0	0	0	0.0173364
8692	555.02	1	0	1	0	0	0	0.0174361
8694	555.054	1	0	1	0	0	0	0.017441
8696	555.087	1	0	1	0	0	0	0.0175658
8698	555.12	1	0	1	0	0	0	0.0176893
8700	555.154	1	0	1	0	0	0	0.0177921
8702	555.187	1	0	1	0	0	0	0.0176401
8704	555.22	1	0	1	0	0	0	0.0173423
8706	555.254	1	0	1	0	0	0	0.017442
8708	555.287	1	0	1	0	0	0	0.0174232
8710	555.32	1	0	1	0	0	0	0.0172914
8712	555.354	1	0	1	0	0	0	0.0171875
8714	555.387	1	0	1	0	0	0	0.0171345
8716	555.42	1	0	1	0	0	0	0.0171209
8718	555.454	1	0	1	0	0	0	0.0170253
8720	555.487	1	0	1	0	0	0	0.0169692
8722	555.52	1	0	1	0	0	0	0.0169503
8724	555.554	1	0	1	0	0	0	0.0169549
8726	555.587	1	0	1	0	0	0	0.0169385
8728	555.62	1	0	1	0	0	0	0.0169441
8730	555.654	1	0	1	0	0	0	0.0170511
8732	555.687	1	0	1	0	0	0	0.0170609
8734	555.72	1	0	1	0	0	0	0.0170368
8736	555.754	1	0	1	0	0	0	0.0170497
8738	555.787	1	0	1	0	0	0	0.0170368
8740	555.82	1	0	1	0	0	0	0.0170302
8742	555.854	1	0	1	0	0	0	0.0170434
8744	555.887	1	0	1	0	0	0	0.016966
8746	555.92	1	0	1	0	0	0	0.0169322
8748	555.954	1	0	1	0	0	0	0.0168987
8750	555.987	1	0	1	0	0	0	0.0168189
8752	556.02	1	0	1	0	0	0	0.0167934
8754	556.054	1	0	1	0	0	0	0.0169057
8756	556.087	1	0	1	0	0	0	0.0170964
8758	556.12	1	0	1	0	0	0	0.0170783
8760	556.154	1	0	1	0	0	0	0.0172419
8762	556.187	1	0	1	0	0	0	0.0173712
8764	556.22	1	0	1	0	0	0	0.0174493
8766	556.254	1	0	1	0	0	0	0.0174312
8768	556.287	1	0	1	0	0	0	0.0175473
8770	556.32	1	0	1	0	0	0	0.0175149
8772	556.354	1	0	1	0	0	0	0.0173932
8774	556.387	1	0	1	0	0	0	0.0172973
8776	556.42	1	0	1	0	0	0	0.0172649
8778	556.454	1	0	1	0	0	0	0.0173147
8780	556.487	1	0	1	0	0	0	0.0171428
8782	556.52	1	0	1	0	0	0	0.017063
8784	556.554	1	0	1	0	0	0	0.0170232
8786	556.587	1	0	1	0	0	0	0.0170396
8788	556.62	1	0	1	0	0	0	0.0169374
8790	556.654	1	0	1	0	0	0	0.0169831
8792	556.687	1	0	1	0	0	0	0.0170462
8794	556.72	1	0	1	0	0	0	0.0171505
8796	556.754	1	0	1	0	0	0	0.01779
8798	556.787	1	0	1	0	0	0	0.017744
8800	556.82	1	0	1	0	0	0	0.017759
8802	556.854	1	0	1	0	0	0	0.0177684
8804	556.887	1	0	1	0	0	0	0.0175756
8806	556.92	1	0	1	0	0	0	0.0174389
8808	556.954	1	0	1	0	0	0	0.0173269
8810	556.987	1	0	1	0	0	0	0.0172032
8812	557.02	1	0	1	0	0	0	0.0171707
8814	557.054	1	0	1	0	0	0	0.0170696
8816	557.087	1	0	1	0	0	0	0.0171603
8818	557.12	1	0	1	0	0	0	0.0171146
8820	557.154	1	0	1	0	0	0	0.0170518
8822	557.187	1	0	1	0	0	0	0.017124
8824	557.22	1	0	1	0	0	0	0.017087
8826	557.254	1	0	1	0	0	0	0.0170319
8828	557.287	1	0	1	0	0	0	0.0169514
8830	557.32	1	0	1	0	0	0	0.0169674
8832	557.354	1	0	1	0	0	0	0.0170117
8834	557.387	1	0	1	0	0	0	0.0170086
8836	557.42	1	0	1	0	0	0	0.0170794
8838	557.454	1	0	1	0	0	0	0.0170762
8840	557.487	1	0	1	0	0	0	0.0169908
8842	557.52	1	0	1	0	0	0	0.0169748
8844	557.554	1	0	1	0	0	0	0.0169207
8846	557.587	1	0	1	0	0	0	0.0169681
8848	557.62	1	0	1	0	0	0	0.017056
8850	557.654	1	0	1	0	0	0	0.017004
8852	557.687	1	0	1	0	0	0	0.0170232
8854	557.72	1	0	1	0	0	0	0.0170386
8856	557.754	1	0	1	0	0	0	0.0171118
8858	557.787	1	0	1	0	0	0	0.0173869
8860	557.82	1	0	1	0	0	0	0.0176167
8862	557.854	1	0	1	0	0	0	0.0177032
8864	557.887	1	0	1	0	0	0	0.0176906
8866	557.92	1	0	1	0	0	0	0.017577
8868	557.954	1	0	1	0	0	0	0.0173343
8870	557.987	1	0	1	0	0	0	0.0171348
8872	558.02	1	0	1	0	0	0	0.0171209
8874	558.054	1	0	1	0	0	0	0.0171003
8876	558.087	1	0	1	0	0	0	0.017253
8878	558.12	1	0	1	0	0	0	0.0175118
8880	558.154	1	0	1	0	0	0	0.0176303
8882	558.187	1	0	1	0	0	0	0.0176024
8884	558.22	1	0	1	0	0	0	0.0175944
8886	558.254	1	0	1	0	0	0	0.0174828
8888	558.287	1	0	1	0	0	0	0.01757
8890	558.32	1	0	1	0	0	0	0.0175567
8892	558.354	1	0	1	0	0	0	0.0175233
8894	558.387	1	0	1	0	0	0	0.0173733
8896	558.42	1	0	1	0	0	0	0.0171453
8898	558.454	1	0	1	0	0	0	0.0171491
8900	558.487	1	0	1	0	0	0	0.0171386
8902	558.52	1	0	1	0	0	0	0.0172171
8904	558.554	1	0	1	0	0	0	0.017185
8906	558.587	1	0	1	0	0	0	0.017139
8908	558.62	1	0	1	0	0	0	0.0171484
8910	558.654	1	0	1	0	0	0	0.0170438
8912	558.687	1	0	1	0	0	0	0.0170019
8914	558.72	1	0	1	0	0	0	0.0169451
8916	558.754	1	0	1	0	0	0	0.0168199
8918	558.787	1	0	1	0	0	0	0.0168712
8920	558.82	1	0	1	0	0	0	0.01692
8922	558.854	1	0	1	0	0	0	0.0169936
8924	558.887	1	0	1	0	0	0	0.0171317
8926	558.92	1	0	1	0	0	0	0.0171139
8928	558.954	1	0	1	0	0	0	0.0171812
8930	558.987	1	0	1	0	0	0	0.0171191
8932	559.02	1	0	1	0	0	0	0.0170905
8934	559.054	1	0	1	0	0	0	0.017139
8936	559.087	1	0	1	0	0	0	0.017093
8938	559.12	1	0	1	0	0	0	0.0171188
8940	559.154	1	0	1	0	0	0	0.0169967
8942	559.187	1	0	1	0	0	0	0.017117
8944	559.22	1	0	1	0	0	0	0.0171041
8946	559.254	1	0	1	0	0	0	0.0170152
8948	559.287	1	0	1	0	0	0	0.0170448
8950	559.32	1	0	1	0	0	0	0.0169688
8952	559.354	1	0	1	0	0	0	0.0170264
8954	559.387	1	0	1	0	0	0	0.0169754
8956	559.42	1	0	1	0	0	0	0.0169503
8958	559.454	1	0	1	0	0	0	0.0169915
8960	559.487	1	0	1	0	0	0	0.0169632
8962	559.52	1	0	1	0	0	0	0.0170023
8964	559.554	1	0	1	0	0	0	0.0170155
8966	559.587	1	0	1	0	0	0	0.0169674
8968	559.62	1	0	1	0	0	0	0.0170382
8970	559.654	1	0	1	0	0	0	0.0170497
8972	559.687	1	0	1	0	0	0	0.0170333
8974	559.72	1	0	1	0	0	0	0.0169636
8976	559.754	1	0	1	0	0	0	0.0168335
8978	559.787	1	0	1	0	0	0	0.0168524
8980	559.82	1	0	1	0	0	0	0.0168318
8982	559.854	1	0	1	0	0	0	0.0168768
8984	559.887	1	0	1	0	0	0	0.0170682
8986	559.92	1	0	1	0	0	0	0.0171913
8988	559.954	1	0	1	0	0	0	0.0173552
8990	559.987	1	0	1	0	0	0	0.0172492
8992	560.02	1	0	1	0	0	0	0.0172059
8994	560.054	1	0	1	0	0	0	0.0173705
8996	560.087	1	0	1	0	0	0	0.017367
8998	560.12	1	0	1	0	0	0	0.0174319
9000	560.154	1	0	1	0	0	0	0.0173538
9002	560.187	1	0	1	0	0	0	0.0173228
9004	560.22	1	0	1	0	0	0	0.0171631
9006	560.254	1	0	1	0	0	0	0.0171271
9008	560.287	1	0	1	0	0	0	0.0170403
9010	560.32	1	0	1	0	0	0	0.0170846
9012	560.354	1	0	1	0	0	0	0.0172506
9014	560.387	1	0	1	0	0	0	0.0173367
9016	560.42	1	0	1	0	0	0	0.0173932
9018	560.454	1	0	1	0	0	0	0.017532
9020	560.487	1	0	1	0	0	0	0.017433
9022	560.52	1	0	1	0	0	0	0.0173339
9024	560.554	1	0	1	0	0	0	0.0174964
9026	560.587	1	0	1	0	0	0	0.0175683
9028	560.62	1	0	1	0	0	0	0.0175435
9030	560.654	1	0	1	0	0	0	0.017426
9032	560.687	1	0	1	0	0	0	0.0172942
9034	560.72	1	0	1	0	0	0	0.0171397
9036	560.754	1	0	1	0	0	0	0.0170434
9038	560.787	1	0	1	0	0	0	0.0169992
9040	560.82	1	0	1	0	0	0	0.0170874
9042	560.854	1	0	1	0	0	0	0.0169657
9044	560.887	1	0	1	0	0	0	0.0168991
9046	560.92	1	0	1	0	0	0	0.0169099
9048	560.954	1	0	1	0	0	0	0.0168796
9050	560.987	1	0	1	0	0	0	0.0169319
9052	561.02	1	0	1	0	0	0	0.0169315
9054	561.054	1	0	1	0	0	0	0.0170013
9056	561.087	1	0	1	0	0	0	0.0169915
9058	561.12	1	0	1	0	0	0	0.0170019
9060	561.154	1	0	1	0	0	0	0.016988
9062	561.187	1	0	1	0	0	0	0.0170229
9064	561.22	1	0	1	0	0	0	0.0170971
9066	561.254	1	0	1	0	0	0	0.0171613
9068	561.287	1	0	1	0	0	0	0.0174319
9070	561.32	1	0	1	0	0	0	0.0176519
9072	561.354	1	0	1	0	0	0	0.0176652
9074	561.387	1	0	1	0	0	0	0.0177161
9076	561.42	1	0	1	0	0	0	0.0176464
9078	561.454	1	0	1	0	0	0	0.0174776
9080	561.487	1	0	1	0	0	0	0.0173385
9082	561.52	1	0	1	0	0	0	0.0172199
9084	561.554	1	0	1	0	0	0	0.0171491
9086	561.587	1	0	1	0	0	0	0.0171153
9088	561.62	1	0	1	0	0	0	0.0170054
9090	561.654	1	0	1	0	0	0	0.0169842
9092	561.687	1	0	1	0	0	0	0.0168963
9094	561.72	1	0	1	0	0	0	0.0168401
9096	561.753	1	0	1	0	0	0	0.0168684
9098	561.787	1	0	1	0	0	0	0.0168531
9100	561.82	1	0	1	0	0	0	0.0169329
9102	561.853	1	0	1	0	0	0	0.0169489
9104	561.887	1	0	1	0	0	0	0.0170281
9106	561.92	1	0	1	0	0	0	0.0171393
9108	561.953	1	0	1	0	0	0	0.0174312
9110	561.987	1	0	1	0	0	0	0.0175257
9112	562.02	1	0	1	0	0	0	0.0174249
9114	562.053	1	0	1	0	0	0	0.0174602
9116	562.087	1	0	1	0	0	0	0.0174786
9118	562.12	1	0	1	0	0	0	0.0173782
9120	562.153	1	0	1	0	0	0	0.0171348
9122	562.187	1	0	1	0	0	0	0.0169782
9124	562.22	1	0	1	0	0	0	0.0170291
9126	562.253	1	0	1	0	0	0	0.0170581
9128	562.287	1	0	1	0	0	0	0.0170386
9130	562.32	1	0	1	0	0	0	0.0169981
9132	562.353	1	0	1	0	0	0	0.0169416
9134	562.387	1	0	1	0	0	0	0.0169204
9136	562.42	1	0	1	0	0	0	0.01673
9138	562.453	1	0	1	0	0	0	0.0167035
9140	562.487	1	0	1	0	0	0	0.0167359
9142	562.52	1	0	1	0	0	0	0.0168154
9144	562.553	1	0	1	0	0	0	0.0168733
9146	562.587	1	0	1	0	0	0	0.0170626
9148	562.62	1	0	1	0	0	0	0.0172809
9150	562.653	1	0	1	0	0	0	0.0171456
9152	562.687	1	0	1	0	0	0	0.0171976
9154	562.72	1	0	1	0	0	0	0.0173339
9156	562.753	1	0	1	0	0	0	0.0172331
9158	562.787	1	0	1	0	0	0	0.0173346
9160	562.82	1	0	1	0	0	0	0.0173475
9162	562.853	1	0	1	0	0	0	0.0174023
9164	562.887	1	0	1	0	0	0	0.0172373
9166	562.92	1	0	1	0	0	0	0.0173503
9168	562.953	1	0	1	0	0	0	0.0171983
9170	562.987	1	0	1	0	0	0	0.0171868
9172	563.02	1	0	1	0	0	0	0.0171948
9174	563.053	1	0	1	0	0	0	0.0170905
9176	563.087	1	0	1	0	0	0	0.0170595
9178	563.12	1	0	1	0	0	0	0.0170253
9180	563.153	1	0	1	0	0	0	0.0168747
9182	563.187	1	0	1	0	0	0	0.0168489
9184	563.22	1	0	1	0	0	0	0.0169615
9186	563.253	1	0	1	0	0	0	0.0170741
9188	563.287	1	0	1	0	0	0	0.0170462
9190	563.32	1	0	1	0	0	0	0.0169974
9192	563.353	1	0	1	0	0	0	0.0170916
9194	563.387	1	0	1	0	0	0	0.0169204
9196	563.42	1	0	1	0	0	0	0.0168963
9198	563.453	1	0	1	0	0	0	0.0167844
9200	563.487	1	0	1	0	0	0	0.0166728
9202	563.52	1	0	1	0	0	0	0.0166961
9204	563.553	1	0	1	0	0	0	0.0167293
9206	563.587	1	0	1	0	0	0	0.0168042
9208	563.62	1	0	1	0	0	0	0.0169291
9210	563.653	1	0	1	0	0	0	0.0169434
9212	563.687	1	0	1	0	0	0	0.0170187
9214	563.72	1	0	1	0	0	0	0.0169326
9216	563.753	1	0	1	0	0	0	0.0168471
9218	563.787	1	0	1	0	0	0	0.0169699
9220	563.82	1	0	1	0	0	0	0.0169741
9222	563.853	1	0	1	0	0	0	0.0171048
9224	563.887	1	0	1	0	0	0	0.0170445
9226	563.92	1	0	1	0	0	0	0.0170971
9228	563.953	1	0	1	0	0	0	0.0169378
9230	563.987	1	0	1	0	0	0	0.016868
9232	564.02	1	0	1	0	0	0	0.0169455
9234	564.053	1	0	1	0	0	0	0.0170194
9236	564.087	1	0	1	0	0	0	0.0171031
9238	564.12	1	0	1	0	0	0	0.0171508
9240	564.153	1	0	1	0	0	0	0.0168478
9242	564.187	1	0	1	0	0	0	0.0167871
9244	564.22	1	0	1	0	0	0	0.0168318
9246	564.253	1	0	1	0	0	0	0.0168796
9248	564.287	1	0	1	0	0	0	0.0168234
9250	564.32	1	0	1	0	0	0	0.0168667
9252	564.353	1	0	1	0	0	0	0.0169144
9254	564.387	1	0	1	0	0	0	0.0172872
9256	564.42	1	0	1	0	0	0	0.0174692
9258	564.453	1	0	1	0	0	0	0.0172168
9260	564.487	1	0	1	0	0	0	0.0170985
9262	564.52	1	0	1	0	0	0	0.0170264
9264	564.553	1	0	1	0	0	0	0.0170316
9266	564.587	1	0	1	0	0	0	0.0169577
9268	564.62	1	0	1	0	0	0	0.0169197
9270	564.653	1	0	1	0	0	0	0.0170417
9272	564.687	1	0	1	0	0	0	0.0170828
9274	564.72	1	0	1	0	0	0	0.0171728
9276	564.753	1	0	1	0	0	0	0.0171899
9278	564.787	1	0	1	0	0	0	0.0171773
9280	564.82	1	0	1	0	0	0	0.0170117
9282	564.853	1	0	1	0	0	0	0.0169646
9284	564.887	1	0	1	0	0	0	0.0170365
9286	564.92	1	0	1	0	0	0	0.0169465
9288	564.953	1	0	1	0	0	0	0.0170298
9290	564.987	1	0	1	0	0	0	0.0171104
9292	565.02	1	0	1	0	0	0	0.0171857
9294	565.053	1	0	1	0	0	0	0.0174026
9296	565.087	1	0	1	0	0	0	0.0174786
9298	565.12	1	0	1	0	0	0	0.0173221
9300	565.153	1	0	1	0	0	0	0.0170162
9302	565.187	1	0	1	0	0	0	0.0169074
9304	565.22	1	0	1	0	0	0	0.0170511
9306	565.253	1	0	1	0	0	0	0.0169971
9308	565.287	1	0	1	0	0	0	0.0169678
9310	565.32	1	0	1	0	0	0	0.0168921
9312	565.353	1	0	1	0	0	0	0.017094
9314	565.387	1	0	1	0	0	0	0.017214
9316	565.42	1	0	1	0	0	0	0.0174239
9318	565.453	1	0	1	0	0	0	0.01735
9320	565.487	1	0	1	0	0	0	0.0173953
9322	565.52	1	0	1	0	0	0	0.0175191
9324	565.553	1	0	1	0	0	0	0.0175588
9326	565.587	1	0	1	0	0	0	0.0174877
9328	565.62	1	0	1	0	0	0	0.0172607
9330	565.653	1	0	1	0	0	0	0.0171592
9332	565.687	1	0	1	0	0	0	0.01717
9334	565.72	1	0	1	0	0	0	0.0171819
9336	565.753	1	0	1	0	0	0	0.0170665
9338	565.787	1	0	1	0	0	0	0.0169183
9340	565.82	1	0	1	0	0	0	0.0169134
9342	565.853	1	0	1	0	0	0	0.016912
9344	565.887	1	0	1	0	0	0	0.0168722
9346	565.92	1	0	1	0	0	0	0.0169402
9348	565.953	1	0	1	0	0	0	0.0169193
9350	565.987	1	0	1	0	0	0	0.0168778
9352	566.02	1	0	1	0	0	0	0.0169012
9354	566.053	1	0	1	0	0	0	0.0168583
9356	566.087	1	0	1	0	0	0	0.016972
9358	566.12	1	0	1	0	0	0	0.0169144
9360	566.153	1	0	1	0	0	0	0.0169545
9362	566.187	1	0	1	0	0	0	0.0169249
9364	566.22	1	0	1	0	0	0	0.0168635
9366	566.253	1	0	1	0	0	0	0.0167338
9368	566.287	1	0	1	0	0	0	0.0165769
9370	566.32	1	0	1	0	0	0	0.0167704
9372	566.353	1	0	1	0	0	0	0.0168844
9374	566.387	1	0	1	0	0	0	0.0170536
9376	566.42	1	0	1	0	0	0	0.0174183
9378	566.453	1	0	1	0	0	0	0.0175812
9380	566.487	1	0	1	0	0	0	0.0176805
9382	566.52	1	0	1	0	0	0	0.0175951
9384	566.553	1	0	1	0	0	0	0.0173629
9386	566.587	1	0	1	0	0	0	0.0172467
9388	566.62	1	0	1	0	0	0	0.0172485
9390	566.653	1	0	1	0	0	0	0.0170801
9392	566.687	1	0	1	0	0	0	0.0171282
9394	566.72	1	0	1	0	0	0	0.0171097
9396	566.753	1	0	1	0	0	0	0.0169845
9398	566.787	1	0	1	0	0	0	0.0169437
9400	566.82	1	0	1	0	0	0	0.0168325
9402	566.853	1	0	1	0	0	0	0.0168987
9404	566.887	1	0	1	0	0	0	0.0167694
9406	566.92	1	0	1	0	0	0	0.016685
9408	566.953	1	0	1	0	0	0	0.0167673
9410	566.987	1	0	1	0	0	0	0.0166986
9412	567.02	1	0	1	0	0	0	0.0167031
9414	567.053	1	0	1	0	0	0	0.0167892
9416	567.087	1	0	1	0	0	0	0.0170197
9418	567.12	1	0	1	0	0	0	0.0169974
9420	567.153	1	0	1	0	0	0	0.0168733
9422	567.187	1	0	1	0	0	0	0.0170145
9424	567.22	1	0	1	0	0	0	0.017162
9426	567.253	1	0	1	0	0	0	0.01689
9428	567.287	1	0	1	0	0	0	0.0168405
9430	567.32	1	0	1	0	0	0	0.0169863
9432	567.353	1	0	1	0	0	0	0.0172778
9434	567.387	1	0	1	0	0	0	0.0171076
9436	567.42	1	0	1	0	0	0	0.0168576
9438	567.453	1	0	1	0	0	0	0.0168834
9440	567.487	1	0	1	0	0	0	0.0169026
9442	567.52	1	0	1	0	0	0	0.017003
9444	567.553	1	0	1	0	0	0	0.0170124
9446	567.587	1	0	1	0	0	0	0.0170288
9448	567.62	1	0	1	0	0	0	0.0173287
9450	567.653	1	0	1	0	0	0	0.0173674
9452	567.687	1	0	1	0	0	0	0.0172405
9454	567.72	1	0	1	0	0	0	0.017033
9456	567.753	1	0	1	0	0	0	0.017018
9458	567.787	1	0	1	0	0	0	0.0169768
9460	567.82	1	0	1	0	0	0	0.0169897
9462	567.853	1	0	1	0	0	0	0.0169228
9464	567.887	1	0	1	0	0	0	0.0168593
9466	567.92	1	0	1	0	0	0	0.0169127
9468	567.953	1	0	1	0	0	0	0.016883
9470	567.987	1	0	1	0	0	0	0.0169078
9472	568.02	1	0	1	0	0	0	0.0169224
9474	568.053	1	0	1	0	0	0	0.0169741
9476	568.087	1	0	1	0	0	0	0.0169493
9478	568.12	1	0	1	0	0	0	0.0168576
9480	568.153	1	0	1	0	0	0	0.0168157
9482	568.187	1	0	1	0	0	0	0.0168998
9484	568.22	1	0	1	0	0	0	0.0170769
9486	568.253	1	0	1	0	0	0	0.0171693
9488	568.287	1	0	1	0	0	0	0.017222
9490	568.32	1	0	1	0	0	0	0.0171676
9492	568.353	1	0	1	0	0	0	0.0170427
9494	568.387	1	0	1	0	0	0	0.0169535
9496	568.42	1	0	1	0	0	0	0.0169887
9498	568.453	1	0	1	0	0	0	0.0169741
9500	568.487	1	0	1	0	0	0	0.016995
9502	568.52	1	0	1	0	0	0	0.0168921
9504	568.553	1	0	1	0	0	0	0.0168945
9506	568.587	1	0	1	0	0	0	0.016927
9508	568.62	1	0	1	0	0	0	0.017049
9510	568.653	1	0	1	0	0	0	0.0172018
9512	568.687	1	0	1	0	0	0	0.0170494
9514	568.72	1	0	1	0	0	0	0.0170344
9516	568.753	1	0	1	0	0	0	0.0171045
9518	568.787	1	0	1	0	0	0	0.0170992
9520	568.82	1	0	1	0	0	0	0.017102
9522	568.853	1	0	1	0	0	0	0.017132
9524	568.887	1	0	1	0	0	0	0.0170236
9526	568.92	1	0	1	0	0	0	0.0171317
9528	568.953	1	0	1	0	0	0	0.0172966
9530	568.987	1	0	1	0	0	0	0.017245
9532	569.02	1	0	1	0	0	0	0.016996
9534	569.053	1	0	1	0	0	0	0.0168112
9536	569.087	1	0	1	0	0	0	0.0168565
9538	569.12	1	0	1	0	0	0	0.0168283
9540	569.153	1	0	1	0	0	0	0.0168004
9542	569.187	1	0	1	0	0	0	0.0169353
9544	569.22	1	0	1	0	0	0	0.0169061
9546	569.253	1	0	1	0	0	0	0.0170616
9548	569.287	1	0	1	0	0	0	0.0172262
9550	569.32	1	0	1	0	0	0	0.0173981
9552	569.353	1	0	1	0	0	0	0.0173569
9554	569.387	1	0	1	0	0	0	0.0171875
9556	569.42	1	0	1	0	0	0	0.0170194
9558	569.453	1	0	1	0	0	0	0.0171627
9560	569.487	1	0	1	0	0	0	0.017261
9562	569.52	1	0	1	0	0	0	0.0171948
9564	569.553	1	0	1	0	0	0	0.0170574
9566	569.587	1	0	1	0	0	0	0.0168956
9568	569.62	1	0	1	0	0	0	0.0168865
9570	569.653	1	0	1	0	0	0	0.0168405
9572	569.686	1	0	1	0	0	0	0.0170536
9574	569.72	1	0	1	0	0	0	0.0170675
9576	569.753	1	0	1	0	0	0	0.0170741
9578	569.786	1	0	1	0	0	0	0.0169685
9580	569.82	1	0	1	0	0	0	0.0169605
9582	569.853	1	0	1	0	0	0	0.0169033
9584	569.886	1	0	1	0	0	0	0.0169486
9586	569.92	1	0	1	0	0	0	0.0170689
9588	569.953	1	0	1	0	0	0	0.0171582
9590	569.986	1	0	1	0	0	0	0.0171299
9592	570.02	1	0	1	0	0	0	0.0168994
9594	570.053	1	0	1	0	0	0	0.0168698
9596	570.086	1	0	1	0	0	0	0.0168349
9598	570.12	1	0	1	0	0	0	0.0169472
9600	570.153	1	0	1	0	0	0	0.0168025
9602	570.186	1	0	1	0	0	0	0.0168283
9604	570.22	1	0	1	0	0	0	0.0168747
9606	570.253	1	0	1	0	0	0	0.0168586
9608	570.286	1	0	1	0	0	0	0.0169629
9610	570.32	1	0	1	0	0	0	0.0168886
9612	570.353	1	0	1	0	0	0	0.0168719
9614	570.386	1	0	1	0	0	0	0.0168904
9616	570.42	1	0	1	0	0	0	0.0168583
9618	570.453	1	0	1	0	0	0	0.0168203
9620	570.486	1	0	1	0	0	0	0.0167871
9622	570.52	1	0	1	0	0	0	0.0168286
9624	570.553	1	0	1	0	0	0	0.0169298
9626	570.586	1	0	1	0	0	0	0.0171453
9628	570.62	1	0	1	0	0	0	0.0172199
9630	570.653	1	0	1	0	0	0	0.0173712
9632	570.686	1	0	1	0	0	0	0.0174459
9634	570.72	1	0	1	0	0	0	0.0171278
9636	570.753	1	0	1	0	0	0	0.0170361
9638	570.786	1	0	1	0	0	0	0.0170149
9640	570.82	1	0	1	0	0	0	0.0169838
9642	570.853	1	0	1	0	0	0	0.0170567
9644	570.886	1	0	1	0	0	0	0.016987
9646	570.92	1	0	1	0	0	0	0.0169252
9648	570.953	1	0	1	0	0	0	0.016927
9650	570.986	1	0	1	0	0	0	0.0169838
9652	571.02	1	0	1	0	0	0	0.0167994
9654	571.053	1	0	1	0	0	0	0.0166731
9656	571.086	1	0	1	0	0	0	0.0166006
9658	571.12	1	0	1	0	0	0	0.0167617
9660	571.153	1	0	1	0	0	0	0.0168517
9662	571.186	1	0	1	0	0	0	0.0169235
9664	571.22	1	0	1	0	0	0	0.0169455
9666	571.253	1	0	1	0	0	0	0.0170072
9668	571.286	1	0	1	0	0	0	0.0169971
9670	571.32	1	0	1	0	0	0	0.0173196
9672	571.353	1	0	1	0	0	0	0.0172837
9674	571.386	1	0	1	0	0	0	0.0170138
9676	571.42	1	0	1	0	0	0	0.0169535
9678	571.453	1	0	1	0	0	0	0.0169371
9680	571.486	1	0	1	0	0	0	0.017079
9682	571.52	1	0	1	0	0	0	0.0170044
9684	571.553	1	0	1	0	0	0	0.0168063
9686	571.586	1	0	1	0	0	0	0.0168335
9688	571.62	1	0	1	0	0	0	0.0169158
9690	571.653	1	0	1	0	0	0	0.0170058
9692	571.686	1	0	1	0	0	0	0.0168534
9694	571.72	1	0	1	0	0	0	0.0168408
9696	571.753	1	0	1	0	0	0	0.0168604
9698	571.786	1	0	1	0	0	0	0.0168485
9700	571.82	1	0	1	0	0	0	0.0170382
9702	571.853	1	0	1	0	0	0	0.0170124
9704	571.886	1	0	1	0	0	0	0.0169134
9706	571.92	1	0	1	0	0	0	0.0168726
9708	571.953	1	0	1	0	0	0	0.0168625
9710	571.986	1	0	1	0	0	0	0.0169416
9712	572.02	1	0	1	0	0	0	0.0168837
9714	572.053	1	0	1	0	0	0	0.0169012
9716	572.086	1	0	1	0	0	0	0.0168018
9718	572.12	1	0	1	0	0	0	0.0168562
9720	572.153	1	0	1	0	0	0	0.0168621
9722	572.186	1	0	1	0	0	0	0.0168987
9724	572.22	1	0	1	0	0	0	0.0169284
9726	572.253	1	0	1	0	0	0	0.0171484
9728	572.286	1	0	1	0	0	0	0.0171491
9730	572.32	1	0	1	0	0	0	0.0171805
9732	572.353	1	0	1	0	0	0	0.017328
9734	572.386	1	0	1	0	0	0	0.0174082
9736	572.42	1	0	1	0	0	0	0.0173273
9738	572.453	1	0	1	0	0	0	0.0171826
9740	572.486	1	0	1	0	0	0	0.0172959
9742	572.52	1	0	1	0	0	0	0.0173133
9744	572.553	1	0	1	0	0	0	0.0170061
9746	572.586	1	0	1	0	0	0	0.0168558
9748	572.62	1	0	1	0	0	0	0.0170121
9750	572.653	1	0	1	0	0	0	0.0172324
9752	572.686	1	0	1	0	0	0	0.0173852
9754	572.72	1	0	1	0	0	0	0.0174703
9756	572.753	1	0	1	0	0	0	0.0173698
9758	572.786	1	0	1	0	0	0	0.0172841
9760	572.82	1	0	1	0	0	0	0.0171801
9762	572.853	1	0	1	0	0	0	0.0169838
9764	572.886	1	0	1	0	0	0	0.0169434
9766	572.92	1	0	1	0	0	0	0.0168265
9768	572.953	1	0	1	0	0	0	0.0168408
9770	572.986	1	0	1	0	0	0	0.0168872
9772	573.02	1	0	1	0	0	0	0.0170546
9774	573.053	1	0	1	0	0	0	0.017033
9776	573.086	1	0	1	0	0	0	0.0168436
9778	573.12	1	0	1	0	0	0	0.0168203
9780	573.153	1	0	1	0	0	0	0.0168639
9782	573.186	1	0	1	0	0	0	0.0167631
9784	573.22	1	0	1	0	0	0	0.0167279
9786	573.253	1	0	1	0	0	0	0.0167139
9788	573.286	1	0	1	0	0	0	0.0166459
9790	573.32	1	0	1	0	0	0	0.0166609
9792	573.353	1	0	1	0	0	0	0.0167017
9794	573.386	1	0	1	0	0	0	0.0168
9796	573.42	1	0	1	0	0	0	0.0167606
9798	573.453	1	0	1	0	0	0	0.016723
9800	573.486	1	0	1	0	0	0	0.0167293
9802	573.52	1	0	1	0	0	0	0.016731
9804	573.553	1	0	1	0	0	0	0.0168189
9806	573.586	1	0	1	0	0	0	0.0168133
9808	573.62	1	0	1	0	0	0	0.0167997
9810	573.653	1	0	1	0	0	0	0.0167722
9812	573.686	1	0	1	0	0	0	0.0167352
9814	573.72	1	0	1	0	0	0	0.0167411
9816	573.753	1	0	1	0	0	0	0.0166609
9818	573.786	1	0	1	0	0	0	0.0166682
9820	573.82	1	0	1	0	0	0	0.0167694
9822	573.853	1	0	1	0	0	0	0.0171578
9824	573.886	1	0	1	0	0	0	0.0171812
9826	573.92	1	0	1	0	0	0	0.0171627
9828	573.953	1	0	1	0	0	0	0.0171791
9830	573.986	1	0	1	0	0	0	0.0173133
9832	574.02	1	0	1	0	0	0	0.0173663
9834	574.053	1	0	1	0	0	0	0.0174124
9836	574.086	1	0	1	0	0	0	0.0173594
9838	574.12	1	0	1	0	0	0	0.0170971
9840	574.153	1	0	1	0	0	0	0.0170706
9842	574.186	1	0	1	0	0	0	0.0170096
9844	574.22	1	0	1	0	0	0	0.0172251
9846	574.253	1	0	1	0	0	0	0.0173534
9848	574.286	1	0	1	0	0	0	0.0173433
9850	574.32	1	0	1	0	0	0	0.0170905
9852	574.353	1	0	1	0	0	0	0.0170619
9854	574.386	1	0	1	0	0	0	0.0171149
9856	574.42	1	0	1	0	0	0	0.0171254
9858	574.453	1	0	1	0	0	0	0.0169657
9860	574.486	1	0	1	0	0	0	0.0171223
9862	574.52	1	0	1	0	0	0	0.0170351
9864	574.553	1	0	1	0	0	0	0.0168809
9866	574.586	1	0	1	0	0	0	0.0168625
9868	574.62	1	0	1	0	0	0	0.0168478
9870	574.653	1	0	1	0	0	0	0.0169455
9872	574.686	1	0	1	0	0	0	0.0170766
9874	574.72	1	0	1	0	0	0	0.0171522
9876	574.753	1	0	1	0	0	0	0.0173862
9878	574.786	1	0	1	0	0	0	0.0172997
9880	574.82	1	0	1	0	0	0	0.0169974
9882	574.853	1	0	1	0	0	0	0.0170487
9884	574.886	1	0	1	0	0	0	0.0170082
9886	574.92	1	0	1	0	0	0	0.0169856
9888	574.953	1	0	1	0	0	0	0.017071
9890	574.986	1	0	1	0	0	0	0.0171631
9892	575.02	1	0	1	0	0	0	0.0171767
9894	575.053	1	0	1	0	0	0	0.0169357
9896	575.086	1	0	1	0	0	0	0.0169517
9898	575.12	1	0	1	0	0	0	0.0168607
9900	575.153	1	0	1	0	0	0	0.0169238
9902	575.186	1	0	1	0	0	0	0.0171006
9904	575.22	1	0	1	0	0	0	0.0170581
9906	575.253	1	0	1	0	0	0	0.0169943
9908	575.286	1	0	1	0	0	0	0.0169918
9910	575.32	1	0	1	0	0	0	0.0169688
9912	575.353	1	0	1	0	0	0	0.0169054
9914	575.386	1	0	1	0	0	0	0.0168782
9916	575.42	1	0	1	0	0	0	0.0168433
9918	575.453	1	0	1	0	0	0	0.0168238
9920	575.486	1	0	1	0	0	0	0.0167763
9922	575.52	1	0	1	0	0	0	0.0169071
9924	575.553	1	0	1	0	0	0	0.0168715
9926	575.586	1	0	1	0	0	0	0.0167931
9928	575.62	1	0	1	0	0	0	0.0167488
9930	575.653	1	0	1	0	0	0	0.0166923
9932	575.686	1	0	1	0	0	0	0.0167575
9934	575.72	1	0	1	0	0	0	0.016747
9936	575.753	1	0	1	0	0	0	0.0167146
9938	575.786	1	0	1	0	0	0	0.016868
9940	575.82	1	0	1	0	0	0	0.0168883
9942	575.853	1	0	1	0	0	0	0.01692
9944	575.886	1	0	1	0	0	0	0.0170142
9946	575.92	1	0	1	0	0	0	0.0169657
9948	575.953	1	0	1	0	0	0	0.0169688
9950	575.986	1	0	1	0	0	0	0.0169814
9952	576.02	1	0	1	0	0	0	0.0169416
9954	576.053	1	0	1	0	0	0	0.0170149
9956	576.086	1	0	1	0	0	0	0.0169102
9958	576.12	1	0	1	0	0	0	0.0169444
9960	576.153	1	0	1	0	0	0	0.0169901
9962	576.186	1	0	1	0	0	0	0.016935
9964	576.22	1	0	1	0	0	0	0.0169803
9966	576.253	1	0	1	0	0	0	0.0169657
9968	576.286	1	0	1	0	0	0	0.0169322
9970	576.32	1	0	1	0	0	0	0.0168886
9972	576.353	1	0	1	0	0	0	0.016815
9974	576.386	1	0	1	0	0	0	0.0167572
9976	576.42	1	0	1	0	0	0	0.0167251
9978	576.453	1	0	1	0	0	0	0.016747
9980	576.486	1	0	1	0	0	0	0.0167987
9982	576.52	1	0	1	0	0	0	0.0167875
9984	576.553	1	0	1	0	0	0	0.0166874
9986	576.586	1	0	1	0	0	0	0.0167422
9988	576.62	1	0	1	0	0	0	0.0168565
9990	576.653	1	0	1	0	0	0	0.0168353
9992	576.686	1	0	1	0	0	0	0.0168077
9994	576.72	1	0	1	0	0	0	0.0167429
9996	576.753	1	0	1	0	0	0	0.0167348
9998	576.786	1	0	1	0	0	0	0.0167258
10000	576.82	1	0	1	0	0	0	0.0167627
10002	576.853	1	0	1	0	0	0	0.0167369
10004	576.886	1	0	1	0	0	0	0.016677
10006	576.92	1	0	1	0	0	0	0.0166958
10008	576.953	1	0	1	0	0	0	0.0168332
10010	576.986	1	0	1	0	0	0	0.0169263
10012	577.02	1	0	1	0	0	0	0.0169674
10014	577.053	1	0	1	0	0	0	0.0170264
10016	577.086	1	0	1	0	0	0	0.0167537
10018	577.12	1	0	1	0	0	0	0.0167767
10020	577.153	1	0	1	0	0	0	0.0169109
10022	577.186	1	0	1	0	0	0	0.0169528
10024	577.22	1	0	1	0	0	0	0.0169542
10026	577.253	1	0	1	0	0	0	0.0169151
10028	577.286	1	0	1	0	0	0	0.016776
10030	577.32	1	0	1	0	0	0	0.016746
10032	577.353	1	0	1	0	0	0	0.0168213
10034	577.386	1	0	1	0	0	0	0.0167415
10036	577.42	1	0	1	0	0	0	0.016799
10038	577.453	1	0	1	0	0	0	0.0168265
10040	577.486	1	0	1	0	0	0	0.0169322
10042	577.52	1	0	1	0	0	0	0.0169521
10044	577.553	1	0	1	0	0	0	0.0167565
10046	577.586	1	0	1	0	0	0	0.0167404
10048	577.62	1	0	1	0	0	0	0.0167673
10050	577.653	1	0	1	0	0	0	0.0167735
10052	577.686	1	0	1	0	0	0	0.0167952
10054	577.72	1	0	1	0	0	0	0.0167502
10056	577.753	1	0	1	0	0	0	0.0168865
10058	577.786	1	0	1	0	0	0	0.0169183
10060	577.82	1	0	1	0	0	0	0.0169008
10062	577.853	1	0	1	0	0	0	0.0168238
10064	577.886	1	0	1	0	0	0	0.0168014
10066	577.92	1	0	1	0	0	0	0.0167314
10068	577.953	1	0	1	0	0	0	0.0168286
10070	577.986	1	0	1	0	0	0	0.0168698
10072	578.02	1	0	1	0	0	0	0.0168272
10074	578.053	1	0	1	0	0	0	0.0168583
10076	578.086	1	0	1	0	0	0	0.0168687
10078	578.12	1	0	1	0	0	0	0.0168764
10080	578.153	1	0	1	0	0	0	0.0170417
10082	578.186	1	0	1	0	0	0	0.0170787
10084	578.219	1	0	1	0	0	0	0.0170605
10086	578.253	1	0	1	0	0	0	0.0169088
10088	578.286	1	0	1	0	0	0	0.0168133
10090	578.319	1	0	1	0	0	0	0.0169008
10092	578.353	1	0	1	0	0	0	0.0168984
10094	578.386	1	0	1	0	0	0	0.0169748
10096	578.419	1	0	1	0	0	0	0.0168973
10098	578.453	1	0	1	0	0	0	0.0167875
10100	578.486	1	0	1	0	0	0	0.0167934
10102	578.519	1	0	1	0	0	0	0.0168579
10104	578.553	1	0	1	0	0	0	0.0168269
10106	578.586	1	0	1	0	0	0	0.0167565
10108	578.619	1	0	1	0	0	0	0.0168035
10110	578.653	1	0	1	0	0	0	0.0168722
10112	578.686	1	0	1	0	0	0	0.0168771
10114	578.719	1	0	1	0	0	0	0.0169699
10116	578.753	1	0	1	0	0	0	0.017011
10118	578.786	1	0	1	0	0	0	0.0169786
10120	578.819	1	0	1	0	0	0	0.0168855
10122	578.853	1	0	1	0	0	0	0.0169158
10124	578.886	1	0	1	0	0	0	0.0170333
10126	578.919	1	0	1	0	0	0	0.0169723
10128	578.953	1	0	1	0	0	0	0.0170504
10130	578.986	1	0	1	0	0	0	0.0171889
10132	579.019	1	0	1	0	0	0	0.0172492
10134	579.053	1	0	1	0	0	0	0.0173276
10136	579.086	1	0	1	0	0	0	0.0171805
10138	579.119	1	0	1	0	0	0	0.0170117
10140	579.153	1	0	1	0	0	0	0.0170766
10142	579.186	1	0	1	0	0	0	0.0170152
10144	579.219	1	0	1	0	0	0	0.0169531
10146	579.253	1	0	1	0	0	0	0.0168921
10148	579.286	1	0	1	0	0	0	0.0168614
10150	579.319	1	0	1	0	0	0	0.0169235
10152	579.353	1	0	1	0	0	0	0.0169559
10154	579.386	1	0	1	0	0	0	0.0169625
10156	579.419	1	0	1	0	0	0	0.0169385
10158	579.453	1	0	1	0	0	0	0.016866
10160	579.486	1	0	1	0	0	0	0.0168698
10162	579.519	1	0	1	0	0	0	0.016966
10164	579.553	1	0	1	0	0	0	0.0168506
10166	579.586	1	0	1	0	0	0	0.0168527
10168	579.619	1	0	1	0	0	0	0.0168279
10170	579.653	1	0	1	0	0	0	0.016792
10172	579.686	1	0	1	0	0	0	0.016875
10174	579.719	1	0	1	0	0	0	0.0168809
10176	579.753	1	0	1	0	0	0	0.0170846
10178	579.786	1	0	1	0	0	0	0.0169479
10180	579.819	1	0	1	0	0	0	0.0169026
10182	579.853	1	0	1	0	0	0	0.0168775
10184	579.886	1	0	1	0	0	0	0.0167474
10186	579.919	1	0	1	0	0	0	0.0166034
10188	579.953	1	0	1	0	0	0	0.0167083
10190	579.986	1	0	1	0	0	0	0.016731
10192	580.019	1	0	1	0	0	0	0.0168353
10194	580.053	1	0	1	0	0	0	0.0167948
10196	580.086	1	0	1	0	0	0	0.0167976
10198	580.119	1	0	1	0	0	0	0.0168335
10200	580.153	1	0	1	0	0	0	0.0168555
10202	580.186	1	0	1	0	0	0	0.0168342
10204	580.219	1	0	1	0	0	0	0.016783
10206	580.253	1	0	1	0	0	0	0.0168042
10208	580.286	1	0	1	0	0	0	0.0168844
10210	580.319	1	0	1	0	0	0	0.0169172
10212	580.353	1	0	1	0	0	0	0.016792
10214	580.386	1	0	1	0	0	0	0.0168531
10216	580.419	1	0	1	0	0	0	0.0168224
10218	580.453	1	0	1	0	0	0	0.0167631
10220	580.486	1	0	1	0	0	0	0.0167767
10222	580.519	1	0	1	0	0	0	0.016747
10224	580.553	1	0	1	0	0	0	0.0167327
10226	580.586	1	0	1	0	0	0	0.0167122
10228	580.619	1	0	1	0	0	0	0.0168116
10230	580.653	1	0	1	0	0	0	0.0167913
10232	580.686	1	0	1	0	0	0	0.0166933
10234	580.719	1	0	1	0	0	0	0.0166972
10236	580.753	1	0	1	0	0	0	0.0167767
10238	580.786	1	0	1	0	0	0	0.016716
10240	580.819	1	0	1	0	0	0	0.0167882
10242	580.853	1	0	1	0	0	0	0.01698
10244	580.886	1	0	1	0	0	0	0.0172973
10246	580.919	1	0	1	0	0	0	0.0175424
10248	580.953	1	0	1	0	0	0	0.0174629
10250	580.986	1	0	1	0	0	0	0.0170902
10252	581.019	1	0	1	0	0	0	0.017056
10254	581.053	1	0	1	0	0	0	0.0169828
10256	581.086	1	0	1	0	0	0	0.0170424
10258	581.119	1	0	1	0	0	0	0.0170211
10260	581.153	1	0	1	0	0	0	0.0170832
10262	581.186	1	0	1	0	0	0	0.0170194
10264	581.219	1	0	1	0	0	0	0.0167701
10266	581.253	1	0	1	0	0	0	0.0168053
10268	581.286	1	0	1	0	0	0	0.0167927
10270	581.319	1	0	1	0	0	0	0.0168551
10272	581.353	1	0	1	0	0	0	0.0168855
10274	581.386	1	0	1	0	0	0	0.0168841
10276	581.419	1	0	1	0	0	0	0.0168942
10278	581.453	1	0	1	0	0	0	0.016821
10280	581.486	1	0	1	0	0	0	0.0168771
10282	581.519	1	0	1	0	0	0	0.0168328
10284	581.553	1	0	1	0	0	0	0.0167436
10286	581.586	1	0	1	0	0	0	0.0166766
10288	581.619	1	0	1	0	0	0	0.0167854
10290	581.653	1	0	1	0	0	0	0.0167882
10292	581.686	1	0	1	0	0	0	0.0168157
10294	581.719	1	0	1	0	0	0	0.016845
10296	581.753	1	0	1	0	0	0	0.0169308
10298	581.786	1	0	1	0	0	0	0.0169967
10300	581.819	1	0	1	0	0	0	0.0169646
10302	581.853	1	0	1	0	0	0	0.0170075
10304	581.886	1	0	1	0	0	0	0.0170215
10306	581.919	1	0	1	0	0	0	0.0168136
10308	581.953	1	0	1	0	0	0	0.0168562
10310	581.986	1	0	1	0	0	0	0.0172042
10312	582.019	1	0	1	0	0	0	0.0171495
10314	582.053	1	0	1	0	0	0	0.0170288
10316	582.086	1	0	1	0	0	0	0.0170964
10318	582.119	1	0	1	0	0	0	0.0171261
10320	582.153	1	0	1	0	0	0	0.0170469
10322	582.186	1	0	1	0	0	0	0.0168914
10324	582.219	1	0	1	0	0	0	0.0168227
10326	582.253	1	0	1	0	0	0	0.0168524
10328	582.286	1	0	1	0	0	0	0.0169148
10330	582.319	1	0	1	0	0	0	0.0169507
10332	582.353	1	0	1	0	0	0	0.0168105
10334	582.386	1	0	1	0	0	0	0.0168569
10336	582.419	1	0	1	0	0	0	0.0169789
10338	582.453	1	0	1	0	0	0	0.0171589
10340	582.486	1	0	1	0	0	0	0.0173165
10342	582.519	1	0	1	0	0	0	0.0174535
10344	582.553	1	0	1	0	0	0	0.0173256
10346	582.586	1	0	1	0	0	0	0.0174518
10348	582.619	1	0	1	0	0	0	0.0175351
10350	582.653	1	0	1	0	0	0	0.0175097
10352	582.686	1	0	1	0	0	0	0.0175069
10354	582.719	1	0	1	0	0	0	0.017442
10356	582.753	1	0	1	0	0	0	0.0172087
10358	582.786	1	0	1	0	0	0	0.0169298
10360	582.819	1	0	1	0	0	0	0.0169158
10362	582.853	1	0	1	0	0	0	0.0168935
10364	582.886	1	0	1	0	0	0	0.0168576
10366	582.919	1	0	1	0	0	0	0.016822
10368	582.953	1	0	1	0	0	0	0.016791
10370	582.986	1	0	1	0	0	0	0.0168192
10372	583.019	1	0	1	0	0	0	0.0168395
10374	583.053	1	0	1	0	0	0	0.0167742
10376	583.086	1	0	1	0	0	0	0.0168032
10378	583.119	1	0	1	0	0	0	0.0167307
10380	583.153	1	0	1	0	0	0	0.0167383
10382	583.186	1	0	1	0	0	0	0.0167178
10384	583.219	1	0	1	0	0	0	0.0166187
10386	583.253	1	0	1	0	0	0	0.016663
10388	583.286	1	0	1	0	0	0	0.0167833
10390	583.319	1	0	1	0	0	0	0.0167411
10392	583.353	1	0	1	0	0	0	0.0168408
10394	583.386	1	0	1	0	0	0	0.0169204
10396	583.419	1	0	1	0	0	0	0.0169085
10398	583.453	1	0	1	0	0	0	0.016943
10400	583.486	1	0	1	0	0	0	0.0170288
10402	583.519	1	0	1	0	0	0	0.017071
10404	583.553	1	0	1	0	0	0	0.017019
10406	583.586	1	0	1	0	0	0	0.016935
10408	583.619	1	0	1	0	0	0	0.0170762
10410	583.653	1	0	1	0	0	0	0.017049
10412	583.686	1	0	1	0	0	0	0.0167896
10414	583.719	1	0	1	0	0	0	0.0168042
10416	583.753	1	0	1	0	0	0	0.0169123
10418	583.786	1	0	1	0	0	0	0.0169929
10420	583.819	1	0	1	0	0	0	0.0170013
10422	583.853	1	0	1	0	0	0	0.016889
10424	583.886	1	0	1	0	0	0	0.016837
10426	583.919	1	0	1	0	0	0	0.0167701
10428	583.953	1	0	1	0	0	0	0.0166808
10430	583.986	1	0	1	0	0	0	0.0168339
10432	584.019	1	0	1	0	0	0	0.0167969
10434	584.053	1	0	1	0	0	0	0.0168018
10436	584.086	1	0	1	0	0	0	0.0168196
10438	584.119	1	0	1	0	0	0	0.0168053
10440	584.153	1	0	1	0	0	0	0.0168056
10442	584.186	1	0	1	0	0	0	0.0167798
10444	584.219	1	0	1	0	0	0	0.0168816
10446	584.253	1	0	1	0	0	0	0.0169563
10448	584.286	1	0	1	0	0	0	0.0169346
10450	584.319	1	0	1	0	0	0	0.0168095
10452	584.353	1	0	1	0	0	0	0.0168531
10454	584.386	1	0	1	0	0	0	0.0168307
10456	584.419	1	0	1	0	0	0	0.0168157
10458	584.453	1	0	1	0	0	0	0.0167606
10460	584.486	1	0	1	0	0	0	0.0168869
10462	584.519	1	0	1	0	0	0	0.0168175
10464	584.553	1	0	1	0	0	0	0.0168053
10466	584.586	1	0	1	0	0	0	0.0169092
10468	584.619	1	0	1	0	0	0	0.0167739
10470	584.653	1	0	1	0	0	0	0.0167352
10472	584.686	1	0	1	0	0	0	0.0166679
10474	584.719	1	0	1	0	0	0	0.0164991
10476	584.753	1	0	1	0	0	0	0.0164541
10478	584.786	1	0	1	0	0	0	0.0166546
10480	584.819	1	0	1	0	0	0	0.0166208
10482	584.853	1	0	1	0	0	0	0.0168513
10484	584.886	1	0	1	0	0	0	0.0167913
10486	584.919	1	0	1	0	0	0	0.0167164
10488	584.953	1	0	1	0	0	0	0.01689
10490	584.986	1	0	1	0	0	0	0.0169434
10492	585.019	1	0	1	0	0	0	0.0170135
10494	585.053	1	0	1	0	0	0	0.0170532
10496	585.086	1	0	1	0	0	0	0.0169392
10498	585.119	1	0	1	0	0	0	0.016882
10500	585.153	1	0	1	0	0	0	0.016867
10502	585.186	1	0	1	0	0	0	0.0170978
10504	585.219	1	0	1	0	0	0	0.0172596
10506	585.253	1	0	1	0	0	0	0.0172785
10508	585.286	1	0	1	0	0	0	0.0173391
10510	585.319	1	0	1	0	0	0	0.0173883
10512	585.353	1	0	1	0	0	0	0.0173779
10514	585.386	1	0	1	0	0	0	0.0171892
10516	585.419	1	0	1	0	0	0	0.017048
10518	585.453	1	0	1	0	0	0	0.0170424
10520	585.486	1	0	1	0	0	0	0.0169088
10522	585.519	1	0	1	0	0	0	0.0167892
10524	585.553	1	0	1	0	0	0	0.0168551
10526	585.586	1	0	1	0	0	0	0.016777
10528	585.619	1	0	1	0	0	0	0.0169943
10530	585.653	1	0	1	0	0	0	0.0170511
10532	585.686	1	0	1	0	0	0	0.0170358
10534	585.719	1	0	1	0	0	0	0.0170162
10536	585.753	1	0	1	0	0	0	0.016883
10538	585.786	1	0	1	0	0	0	0.0168415
10540	585.819	1	0	1	0	0	0	0.0168938
10542	585.853	1	0	1	0	0	0	0.0168185
10544	585.886	1	0	1	0	0	0	0.0168865
10546	585.919	1	0	1	0	0	0	0.0168496
10548	585.953	1	0	1	0	0	0	0.0169106
10550	585.986	1	0	1	0	0	0	0.016957
10552	586.019	1	0	1	0	0	0	0.0169224
10554	586.053	1	0	1	0	0	0	0.0168945
10556	586.086	1	0	1	0	0	0	0.0168925
10558	586.119	1	0	1	0	0	0	0.0168761
10560	586.153	1	0	1	0	0	0	0.0167715
10562	586.186	1	0	1	0	0	0	0.0167861
10564	586.219	1	0	1	0	0	0	0.0167083
10566	586.253	1	0	1	0	0	0	0.0167028
10568	586.286	1	0	1	0	0	0	0.0166194
10570	586.319	1	0	1	0	0	0	0.016663
10572	586.353	1	0	1	0	0	0	0.0166909
10574	586.386	1	0	1	0	0	0	0.0167383
10576	586.419	1	0	1	0	0	0	0.0168531
10578	586.453	1	0	1	0	0	0	0.0170117
10580	586.486	1	0	1	0	0	0	0.017004
10582	586.519	1	0	1	0	0	0	0.0170863
10584	586.553	1	0	1	0	0	0	0.0170389
10586	586.586	1	0	1	0	0	0	0.0169486
10588	586.619	1	0	1	0	0	0	0.0170298
10590	586.652	1	0	1	0	0	0	0.0169054
10592	586.686	1	0	1	0	0	0	0.0168914
10594	586.719	1	0	1	0	0	0	0.0169469
10596	586.752	1	0	1	0	0	0	0.0171383
10598	586.786	1	0	1	0	0	0	0.017367
10600	586.819	1	0	1	0	0	0	0.0173165
10602	586.852	1	0	1	0	0	0	0.017343
10604	586.886	1	0	1	0	0	0	0.0172349
10606	586.919	1	0	1	0	0	0	0.0171986
10608	586.952	1	0	1	0	0	0	0.0171847
10610	586.986	1	0	1	0	0	0	0.0171533
10612	587.019	1	0	1	0	0	0	0.0170417
10614	587.052	1	0	1	0	0	0	0.0170916
10616	587.086	1	0	1	0	0	0	0.0169587
10618	587.119	1	0	1	0	0	0	0.0169775
10620	587.152	1	0	1	0	0	0	0.0169877
10622	587.186	1	0	1	0	0	0	0.0170598
10624	587.219	1	0	1	0	0	0	0.0170881
10626	587.252	1	0	1	0	0	0	0.0171767
10628	587.286	1	0	1	0	0	0	0.0172265
10630	587.319	1	0	1	0	0	0	0.0171372
10632	587.352	1	0	1	0	0	0	0.0170891
10634	587.386	1	0	1	0	0	0	0.0170731
10636	587.419	1	0	1	0	0	0	0.0170557
10638	587.452	1	0	1	0	0	0	0.0170361
10640	587.486	1	0	1	0	0	0	0.0171069
10642	587.519	1	0	1	0	0	0	0.0169123
10644	587.552	1	0	1	0	0	0	0.0168757
10646	587.586	1	0	1	0	0	0	0.0168918
10648	587.619	1	0	1	0	0	0	0.0169148
10650	587.652	1	0	1	0	0	0	0.0168886
10652	587.686	1	0	1	0	0	0	0.0168046
10654	587.719	1	0	1	0	0	0	0.0168524
10656	587.752	1	0	1	0	0	0	0.0167987
10658	587.786	1	0	1	0	0	0	0.0167711
10660	587.819	1	0	1	0	0	0	0.0168196
10662	587.852	1	0	1	0	0	0	0.0168963
10664	587.886	1	0	1	0	0	0	0.0167429
10666	587.919	1	0	1	0	0	0	0.0167509
10668	587.952	1	0	1	0	0	0	0.0167038
10670	587.986	1	0	1	0	0	0	0.0165682
10672	588.019	1	0	1	0	0	0	0.0165577
10674	588.052	1	0	1	0	0	0	0.0164918
10676	588.086	1	0	1	0	0	0	0.0166055
10678	588.119	1	0	1	0	0	0	0.0166337
10680	588.152	1	0	1	0	0	0	0.0166874
10682	588.186	1	0	1	0	0	0	0.0168042
10684	588.219	1	0	1	0	0	0	0.0169706
10686	588.252	1	0	1	0	0	0	0.0169392
10688	588.286	1	0	1	0	0	0	0.0169085
10690	588.319	1	0	1	0	0	0	0.0167362
10692	588.352	1	0	1	0	0	0	0.0167324
10694	588.386	1	0	1	0	0	0	0.0169158
10696	588.419	1	0	1	0	0	0	0.0169371
10698	588.452	1	0	1	0	0	0	0.0170013
10700	588.486	1	0	1	0	0	0	0.0167634
10702	588.519	1	0	1	0	0	0	0.016753
10704	588.552	1	0	1	0	0	0	0.0168827
10706	588.586	1	0	1	0	0	0	0.0170142
10708	588.619	1	0	1	0	0	0	0.0170773
10710	588.652	1	0	1	0	0	0	0.0171592
10712	588.686	1	0	1	0	0	0	0.0171934
10714	588.719	1	0	1	0	0	0	0.0171721
10716	588.752	1	0	1	0	0	0	0.0171087
10718	588.786	1	0	1	0	0	0	0.0170455
10720	588.819	1	0	1	0	0	0	0.0169849
10722	588.852	1	0	1	0	0	0	0.0169922
10724	588.886	1	0	1	0	0	0	0.0169716
10726	588.919	1	0	1	0	0	0	0.0169479
10728	588.952	1	0	1	0	0	0	0.0167906
10730	588.986	1	0	1	0	0	0	0.016753
10732	589.019	1	0	1	0	0	0	0.0165999
10734	589.052	1	0	1	0	0	0	0.0168318
10736	589.086	1	0	1	0	0	0	0.01695
10738	589.119	1	0	1	0	0	0	0.0168259
10740	589.152	1	0	1	0	0	0	0.016791
10742	589.186	1	0	1	0	0	0	0.0167582
10744	589.219	1	0	1	0	0	0	0.0167753
10746	589.252	1	0	1	0	0	0	0.0168865
10748	589.286	1	0	1	0	0	0	0.0168234
10750	589.319	1	0	1	0	0	0	0.0167666
10752	589.352	1	0	1	0	0	0	0.0167425
10754	589.386	1	0	1	0	0	0	0.0167533
10756	589.419	1	0	1	0	0	0	0.0169364
10758	589.452	1	0	1	0	0	0	0.0170759
10760	589.486	1	0	1	0	0	0	0.0171456
10762	589.519	1	0	1	0	0	0	0.0172541
10764	589.552	1	0	1	0	0	0	0.0173043
10766	589.586	1	0	1	0	0	0	0.0172865
10768	589.619	1	0	1	0	0	0	0.0168932
10770	589.652	1	0	1	0	0	0	0.0168217
10772	589.686	1	0	1	0	0	0	0.0168698
10774	589.719	1	0	1	0	0	0	0.0169315
10776	589.752	1	0	1	0	0	0	0.0168053
10778	589.786	1	0	1	0	0	0	0.0169493
10780	589.819	1	0	1	0	0	0	0.0170072
10782	589.852	1	0	1	0	0	0	0.0170319
10784	589.886	1	0	1	0	0	0	0.0168998
10786	589.919	1	0	1	0	0	0	0.0168433
10788	589.952	1	0	1	0	0	0	0.0167997
10790	589.986	1	0	1	0	0	0	0.0167474
10792	590.019	1	0	1	0	0	0	0.0167948
10794	590.052	1	0	1	0	0	0	0.0167966
10796	590.086	1	0	1	0	0	0	0.0168095
10798	590.119	1	0	1	0	0	0	0.0168213
10800	590.152	1	0	1	0	0	0	0.0169134
10802	590.186	1	0	1	0	0	0	0.0168998
10804	590.219	1	0	1	0	0	0	0.0169754
10806	590.252	1	0	1	0	0	0	0.0170312
10808	590.286	1	0	1	0	0	0	0.01689
10810	590.319	1	0	1	0	0	0	0.0168541
10812	590.352	1	0	1	0	0	0	0.0167994
10814	590.386	1	0	1	0	0	0	0.0168858
10816	590.419	1	0	1	0	0	0	0.0169441
10818	590.452	1	0	1	0	0	0	0.0169165
10820	590.486	1	0	1	0	0	0	0.0169681
10822	590.519	1	0	1	0	0	0	0.0169727
10824	590.552	1	0	1	0	0	0	0.0169577
10826	590.586	1	0	1	0	0	0	0.0169932
10828	590.619	1	0	1	0	0	0	0.0169263
10830	590.652	1	0	1	0	0	0	0.0169235
10832	590.686	1	0	1	0	0	0	0.0169207
10834	590.719	1	0	1	0	0	0	0.0167945
10836	590.752	1	0	1	0	0	0	0.0168136
10838	590.786	1	0	1	0	0	0	0.0168733
10840	590.819	1	0	1	0	0	0	0.0169462
10842	590.852	1	0	1	0	0	0	0.0169685
10844	590.886	1	0	1	0	0	0	0.0168007
10846	590.919	1	0	1	0	0	0	0.0167655
10848	590.952	1	0	1	0	0	0	0.0169061
10850	590.986	1	0	1	0	0	0	0.0169925
10852	591.019	1	0	1	0	0	0	0.0170591
10854	591.052	1	0	1	0	0	0	0.0169821
10856	591.086	1	0	1	0	0	0	0.0169287
10858	591.119	1	0	1	0	0	0	0.0169838
10860	591.152	1	0	1	0	0	0	0.0169741
10862	591.186	1	0	1	0	0	0	0.0169374
10864	591.219	1	0	1	0	0	0	0.0169486
10866	591.252	1	0	1	0	0	0	0.0168367
10868	591.286	1	0	1	0	0	0	0.016965
10870	591.319	1	0	1	0	0	0	0.0170271
10872	591.352	1	0	1	0	0	0	0.0170232
10874	591.386	1	0	1	0	0	0	0.0170089
10876	591.419	1	0	1	0	0	0	0.0169957
10878	591.452	1	0	1	0	0	0	0.0169434
10880	591.486	1	0	1	0	0	0	0.0170661
10882	591.519	1	0	1	0	0	0	0.0170114
10884	591.552	1	0	1	0	0	0	0.0169716
10886	591.586	1	0	1	0	0	0	0.01704
10888	591.619	1	0	1	0	0	0	0.016936
10890	591.652	1	0	1	0	0	0	0.0170169
10892	591.686	1	0	1	0	0	0	0.0170142
10894	591.719	1	0	1	0	0	0	0.017025
10896	591.752	1	0	1	0	0	0	0.0171013
10898	591.786	1	0	1	0	0	0	0.0169946
10900	591.819	1	0	1	0	0	0	0.0169845
10902	591.852	1	0	1	0	0	0	0.0170584
10904	591.886	1	0	1	0	0	0	0.017101
10906	591.919	1	0	1	0	0	0	0.0171411
10908	591.952	1	0	1	0	0	0	0.0169789
10910	591.986	1	0	1	0	0	0	0.0170427
10912	592.019	1	0	1	0	0	0	0.0171188
10914	592.052	1	0	1	0	0	0	0.0171993
10916	592.086	1	0	1	0	0	0	0.0171536
10918	592.119	1	0	1	0	0	0	0.0172
10920	592.152	1	0	1	0	0	0	0.0171773
10922	592.186	1	0	1	0	0	0	0.0172516
10924	592.219	1	0	1	0	0	0	0.0171512
10926	592.252	1	0	1	0	0	0	0.0170344
10928	592.286	1	0	1	0	0	0	0.0170403
10930	592.319	1	0	1	0	0	0	0.0170703
10932	592.352	1	0	1	0	0	0	0.0171195
10934	592.386	1	0	1	0	0	0	0.0171787
10936	592.419	1	0	1	0	0	0	0.0172042
10938	592.452	1	0	1	0	0	0	0.0173318
10940	592.486	1	0	1	0	0	0	0.0172579
10942	592.519	1	0	1	0	0	0	0.0171352
10944	592.552	1	0	1	0	0	0	0.017025
10946	592.586	1	0	1	0	0	0	0.0169221
10948	592.619	1	0	1	0	0	0	0.0168862
10950	592.652	1	0	1	0	0	0	0.0168925
10952	592.686	1	0	1	0	0	0	0.016851
10954	592.719	1	0	1	0	0	0	0.0169036
10956	592.752	1	0	1	0	0	0	0.0168844
10958	592.786	1	0	1	0	0	0	0.0168987
10960	592.819	1	0	1	0	0	0	0.0168335
10962	592.852	1	0	1	0	0	0	0.0167579
10964	592.886	1	0	1	0	0	0	0.0167296
10966	592.919	1	0	1	0	0	0	0.0167547
10968	592.952	1	0	1	0	0	0	0.0167687
10970	592.986	1	0	1	0	0	0	0.0167104
10972	593.019	1	0	1	0	0	0	0.0166239
10974	593.052	1	0	1	0	0	0	0.0166131
10976	593.086	1	0	1	0	0	0	0.0167669
10978	593.119	1	0	1	0	0	0	0.0168346
10980	593.152	1	0	1	0	0	0	0.016965
10982	593.186	1	0	1	0	0	0	0.0170567
10984	593.219	1	0	1	0	0	0	0.0172701
10986	593.252	1	0	1	0	0	0	0.01729
10988	593.286	1	0	1	0	0	0	0.0173238
10990	593.319	1	0	1	0	0	0	0.0173092
10992	593.352	1	0	1	0	0	0	0.0172854
10994	593.386	1	0	1	0	0	0	0.0171972
10996	593.419	1	0	1	0	0	0	0.0172757
10998	593.452	1	0	1	0	0	0	0.0172666
11000	593.486	1	0	1	0	0	0	0.017238
11002	593.519	1	0	1	0	0	0	0.0171013
11004	593.552	1	0	1	0	0	0	0.0171324
11006	593.586	1	0	1	0	0	0	0.0171156
11008	593.619	1	0	1	0	0	0	0.0170543
11010	593.652	1	0	1	0	0	0	0.016988
11012	593.686	1	0	1	0	0	0	0.0169727
11014	593.719	1	0	1	0	0	0	0.0170637
11016	593.752	1	0	1	0	0	0	0.017003
11018	593.786	1	0	1	0	0	0	0.0169545
11020	593.819	1	0	1	0	0	0	0.0169033
11022	593.852	1	0	1	0	0	0	0.0169713
11024	593.886	1	0	1	0	0	0	0.0170316
11026	593.919	1	0	1	0	0	0	0.0169915
11028	593.952	1	0	1	0	0	0	0.0170682
11030	593.986	1	0	1	0	0	0	0.0169692
11032	594.019	1	0	1	0	0	0	0.0170295
11034	594.052	1	0	1	0	0	0	0.0169978
11036	594.086	1	0	1	0	0	0	0.0169312
11038	594.119	1	0	1	0	0	0	0.0169503
11040	594.152	1	0	1	0	0	0	0.0169151
11042	594.186	1	0	1	0	0	0	0.0168018
11044	594.219	1	0	1	0	0	0	0.0168785
11046	594.252	1	0	1	0	0	0	0.0167456
11048	594.286	1	0	1	0	0	0	0.0168234
11050	594.319	1	0	1	0	0	0	0.0168464
11052	594.352	1	0	1	0	0	0	0.0168035
11054	594.386	1	0	1	0	0	0	0.0169224
11056	594.419	1	0	1	0	0	0	0.0167945
11058	594.452	1	0	1	0	0	0	0.0168492
11060	594.486	1	0	1	0	0	0	0.0168593
11062	594.519	1	0	1	0	0	0	0.0166501
11064	594.552	1	0	1	0	0	0	0.0167397
11066	594.586	1	0	1	0	0	0	0.0167143
11068	594.619	1	0	1	0	0	0	0.0167432
11070	594.652	1	0	1	0	0	0	0.0168098
11072	594.686	1	0	1	0	0	0	0.0167631
11074	594.719	1	0	1	0	0	0	0.0168311
11076	594.752	1	0	1	0	0	0	0.0168715
11078	594.786	1	0	1	0	0	0	0.016776
11080	594.819	1	0	1	0	0	0	0.0168018
11082	594.852	1	0	1	0	0	0	0.0167495
11084	594.886	1	0	1	0	0	0	0.0168356
11086	594.919	1	0	1	0	0	0	0.0169228
11088	594.952	1	0	1	0	0	0	0.0167823
11090	594.986	1	0	1	0	0	0	0.0168677
11092	595.019	1	0	1	0	0	0	0.0168761
11094	595.052	1	0	1	0	0	0	0.0168143
11096	595.085	1	0	1	0	0	0	0.0168482
11098	595.119	1	0	1	0	0	0	0.0168816
11100	595.152	1	0	1	0	0	0	0.0167132
11102	595.185	1	0	1	0	0	0	0.0167687
11104	595.219	1	0	1	0	0	0	0.0167976
11106	595.252	1	0	1	0	0	0	0.0167178
11108	595.285	1	0	1	0	0	0	0.0166707
11110	595.319	1	0	1	0	0	0	0.016656
11112	595.352	1	0	1	0	0	0	0.0168314
11114	595.385	1	0	1	0	0	0	0.0167763
11116	595.419	1	0	1	0	0	0	0.0167254
11118	595.452	1	0	1	0	0	0	0.016724
11120	595.485	1	0	1	0	0	0	0.0166752
11122	595.519	1	0	1	0	0	0	0.016753
11124	595.552	1	0	1	0	0	0	0.0168112
11126	595.585	1	0	1	0	0	0	0.0167666
11128	595.619	1	0	1	0	0	0	0.0167411
11130	595.652	1	0	1	0	0	0	0.0168534
11132	595.685	1	0	1	0	0	0	0.0168823
11134	595.719	1	0	1	0	0	0	0.0170407
11136	595.752	1	0	1	0	0	0	0.0169476
11138	595.785	1	0	1	0	0	0	0.0169284
11140	595.819	1	0	1	0	0	0	0.0169657
11142	595.852	1	0	1	0	0	0	0.0169088
11144	595.885	1	0	1	0	0	0	0.0168384
11146	595.919	1	0	1	0	0	0	0.0169116
11148	595.952	1	0	1	0	0	0	0.0168848
11150	595.985	1	0	1	0	0	0	0.0169263
11152	596.019	1	0	1	0	0	0	0.0168848
11154	596.052	1	0	1	0	0	0	0.0167551
11156	596.085	1	0	1	0	0	0	0.0168332
11158	596.119	1	0	1	0	0	0	0.0168199
11160	596.152	1	0	1	0	0	0	0.0168778
11162	596.185	1	0	1	0	0	0	0.0169137
11164	596.219	1	0	1	0	0	0	0.0168384
11166	596.252	1	0	1	0	0	0	0.016822
11168	596.285	1	0	1	0	0	0	0.0169008
11170	596.319	1	0	1	0	0	0	0.0167565
11172	596.352	1	0	1	0	0	0	0.0168548
11174	596.385	1	0	1	0	0	0	0.0168524
11176	596.419	1	0	1	0	0	0	0.016837
11178	596.452	1	0	1	0	0	0	0.0168761
11180	596.485	1	0	1	0	0	0	0.0170696
11182	596.519	1	0	1	0	0	0	0.0169319
11184	596.552	1	0	1	0	0	0	0.0168206
11186	596.585	1	0	1	0	0	0	0.0169033
11188	596.619	1	0	1	0	0	0	0.0169263
11190	596.652	1	0	1	0	0	0	0.0169068
11192	596.685	1	0	1	0	0	0	0.0169734
11194	596.719	1	0	1	0	0	0	0.0169448
11196	596.752	1	0	1	0	0	0	0.0169374
11198	596.785	1	0	1	0	0	0	0.0168984
11200	596.819	1	0	1	0	0	0	0.0168677
11202	596.852	1	0	1	0	0	0	0.0169179
11204	596.885	1	0	1	0	0	0	0.0169085
11206	596.919	1	0	1	0	0	0	0.016851
11208	596.952	1	0	1	0	0	0	0.0169245
11210	596.985	1	0	1	0	0	0	0.0171599
11212	597.019	1	0	1	0	0	0	0.017093
11214	597.052	1	0	1	0	0	0	0.0172373
11216	597.085	1	0	1	0	0	0	0.0170776
11218	597.119	1	0	1	0	0	0	0.0169441
11220	597.152	1	0	1	0	0	0	0.0169458
11222	597.185	1	0	1	0	0	0	0.0167906
11224	597.219	1	0	1	0	0	0	0.0168286
11226	597.252	1	0	1	0	0	0	0.0168984
11228	597.285	1	0	1	0	0	0	0.016875
11230	597.319	1	0	1	0	0	0	0.0169807
11232	597.352	1	0	1	0	0	0	0.0170724
11234	597.385	1	0	1	0	0	0	0.0170452
11236	597.419	1	0	1	0	0	0	0.0172286
11238	597.452	1	0	1	0	0	0	0.0170686
11240	597.485	1	0	1	0	0	0	0.0168984
11242	597.519	1	0	1	0	0	0	0.0168489
11244	597.552	1	0	1	0	0	0	0.0167819
11246	597.585	1	0	1	0	0	0	0.0168496
11248	597.619	1	0	1	0	0	0	0.0168611
11250	597.652	1	0	1	0	0	0	0.0168768
11252	597.685	1	0	1	0	0	0	0.0168834
11254	597.719	1	0	1	0	0	0	0.0167969
11256	597.752	1	0	1	0	0	0	0.0169022
11258	597.785	1	0	1	0	0	0	0.0170623
11260	597.819	1	0	1	0	0	0	0.0169388
11262	597.852	1	0	1	0	0	0	0.016927
11264	597.885	1	0	1	0	0	0	0.0167244
11266	597.919	1	0	1	0	0	0	0.0167293
11268	597.952	1	0	1	0	0	0	0.0168694
11270	597.985	1	0	1	0	0	0	0.0168175
11272	598.019	1	0	1	0	0	0	0.0168081
11274	598.052	1	0	1	0	0	0	0.016776
11276	598.085	1	0	1	0	0	0	0.0167575
11278	598.119	1	0	1	0	0	0	0.0169444
11280	598.152	1	0	1	0	0	0	0.0169535
11282	598.185	1	0	1	0	0	0	0.0168827
11284	598.219	1	0	1	0	0	0	0.0167526
11286	598.252	1	0	1	0	0	0	0.0166916
11288	598.285	1	0	1	0	0	0	0.016709
11290	598.319	1	0	1	0	0	0	0.0166731
11292	598.352	1	0	1	0	0	0	0.0166484
11294	598.385	1	0	1	0	0	0	0.0166184
11296	598.419	1	0	1	0	0	0	0.0165961
11298	598.452	1	0	1	0	0	0	0.0165274
11300	598.485	1	0	1	0	0	0	0.0165675
11302	598.519	1	0	1	0	0	0	0.0166009
11304	598.552	1	0	1	0	0	0	0.0165643
11306	598.585	1	0	1	0	0	0	0.0167191
11308	598.619	1	0	1	0	0	0	0.0167463
11310	598.652	1	0	1	0	0	0	0.0166968
11312	598.685	1	0	1	0	0	0	0.0167498
11314	598.719	1	0	1	0	0	0	0.0167767
11316	598.752	1	0	1	0	0	0	0.0167366
11318	598.785	1	0	1	0	0	0	0.0167355
11320	598.819	1	0	1	0	0	0	0.0166602
11322	598.852	1	0	1	0	0	0	0.0166937
11324	598.885	1	0	1	0	0	0	0.0166738
11326	598.919	1	0	1	0	0	0	0.0166979
11328	598.952	1	0	1	0	0	0	0.0167453
11330	598.985	1	0	1	0	0	0	0.016745
11332	599.019	1	0	1	0	0	0	0.0169458
11334	599.052	1	0	1	0	0	0	0.0169531
11336	599.085	1	0	1	0	0	0	0.0167882
11338	599.119	1	0	1	0	0	0	0.0168161
11340	599.152	1	0	1	0	0	0	0.0167066
11342	599.185	1	0	1	0	0	0	0.0167631
11344	599.219	1	0	1	0	0	0	0.0167254
11346	599.252	1	0	1	0	0	0	0.0166717
11348	599.285	1	0	1	0	0	0	0.0166766
11350	599.319	1	0	1	0	0	0	0.0166675
11352	599.352	1	0	1	0	0	0	0.0166609
11354	599.385	1	0	1	0	0	0	0.0166341
11356	599.419	1	0	1	0	0	0	0.0167066
11358	599.452	1	0	1	0	0	0	0.0166588
11360	599.485	1	0	1	0	0	0	0.0167017
11362	599.519	1	0	1	0	0	0	0.0166717
11364	599.552	1	0	1	0	0	0	0.016655
11366	599.585	1	0	1	0	0	0	0.0166913
11368	599.619	1	0	1	0	0	0	0.0166637
11370	599.652	1	0	1	0	0	0	0.0166306
11372	599.685	1	0	1	0	0	0	0.0167031
11374	599.719	1	0	1	0	0	0	0.0166546
11376	599.752	1	0	1	0	0	0	0.0166881
11378	599.785	1	0	1	0	0	0	0.0166491
11380	599.819	1	0	1	0	0	0	0.0165908
11382	599.852	1	0	1	0	0	0	0.0167592
11384	599.885	1	0	1	0	0	0	0.0171041
11386	599.919	1	0	1	0	0	0	0.0170591
11388	599.952	1	0	1	0	0	0	0.0168318
11390	599.985	1	0	1	0	0	0	0.0167826
11392	600.019	1	0	1	0	0	0	0.0167798
11394	600.052	1	0	1	0	0	0	0.0167327
11396	600.085	1	0	1	0	0	0	0.0167955
11398	600.119	1	0	1	0	0	0	0.0167446
11400	600.152	1	0	1	0	0	0	0.0167624
11402	600.185	1	0	1	0	0	0	0.0167254
11404	600.219	1	0	1	0	0	0	0.0167509
11406	600.252	1	0	1	0	0	0	0.0167805
11408	600.285	1	0	1	0	0	0	0.0166972
11410	600.319	1	0	1	0	0	0	0.0166836
11412	600.352	1	0	1	0	0	0	0.0167261
11414	600.385	1	0	1	0	0	0	0.016747
11416	600.419	1	0	1	0	0	0	0.0166902
11418	600.452	1	0	1	0	0	0	0.0166679
11420	600.485	1	0	1	0	0	0	0.0166257
11422	600.519	1	0	1	0	0	0	0.016647
11424	600.552	1	0	1	0	0	0	0.0167481
[truncated: 25,159 more rows]

## Sheet: Mouse_3_470_Signal
FrameCounter	Timestamp	LedState	Stimulation	Output0	Output1	Input0	Input1	Region0G
7427	533.938	2	0	1	0	0	0	0.0240999
7429	533.971	2	0	1	0	0	0	0.0243206
7431	534.005	2	0	1	0	0	0	0.0243426
7433	534.038	2	0	1	0	0	0	0.0241553
7435	534.071	2	0	1	0	0	0	0.0240507
7437	534.105	2	0	1	0	0	0	0.0238199
7439	534.138	2	0	1	0	0	0	0.0238283
7441	534.171	2	0	1	0	0	0	0.0238105
7443	534.205	2	0	1	0	0	0	0.0238875
7445	534.238	2	0	1	0	0	0	0.0239105
7447	534.271	2	0	1	0	0	0	0.0239726
7449	534.305	2	0	1	0	0	0	0.0241721
7451	534.338	2	0	1	0	0	0	0.0239615
7453	534.371	2	0	1	0	0	0	0.0240211
7455	534.405	2	0	1	0	0	0	0.0239765
7457	534.438	2	0	1	0	0	0	0.0238949
7459	534.471	2	0	1	0	0	0	0.023929
7461	534.505	2	0	1	0	0	0	0.023823
7463	534.538	2	0	1	0	0	0	0.0238436
7465	534.571	2	0	1	0	0	0	0.0237135
7467	534.605	2	0	1	0	0	0	0.0236483
7469	534.638	2	0	1	0	0	0	0.023671
7471	534.671	2	0	1	0	0	0	0.0234443
7473	534.705	2	0	1	0	0	0	0.0234959
7475	534.738	2	0	1	0	0	0	0.0236644
7477	534.771	2	0	1	0	0	0	0.0237599
7479	534.805	2	0	1	0	0	0	0.0237895
7481	534.838	2	0	1	0	0	0	0.023731
7483	534.871	2	0	1	0	0	0	0.0242816
7485	534.905	2	0	1	0	0	0	0.0242153
7487	534.938	2	0	1	0	0	0	0.0240873
7489	534.971	2	0	1	0	0	0	0.024291
7491	535.005	2	0	1	0	0	0	0.0242052
7493	535.038	2	0	1	0	0	0	0.0243855
7495	535.071	2	0	1	0	0	0	0.0245285
7497	535.105	2	0	1	0	0	0	0.0243973
7499	535.138	2	0	1	0	0	0	0.0244967
7501	535.171	2	0	1	0	0	0	0.0245079
7503	535.205	2	0	1	0	0	0	0.0243607
7505	535.238	2	0	1	0	0	0	0.02426
7507	535.271	2	0	1	0	0	0	0.0243297
7509	535.305	2	0	1	0	0	0	0.0243035
7511	535.338	2	0	1	0	0	0	0.0242268
7513	535.371	2	0	1	0	0	0	0.0248887
7515	535.405	2	0	1	0	0	0	0.0252102
7517	535.438	2	0	1	0	0	0	0.0257141
7519	535.471	2	0	1	0	0	0	0.0252538
7521	535.505	2	0	1	0	0	0	0.0263651
7523	535.538	2	0	1	0	0	0	0.0272941
7525	535.571	2	0	1	0	0	0	0.0273324
7527	535.605	2	0	1	0	0	0	0.0276546
7529	535.638	2	0	1	0	0	0	0.0276672
7531	535.671	2	0	1	0	0	0	0.0276215
7533	535.705	2	0	1	0	0	0	0.0276606
7535	535.738	2	0	1	0	0	0	0.0276881
7537	535.771	2	0	1	0	0	0	0.0275263
7539	535.805	2	0	1	0	0	0	0.0276473
7541	535.838	2	0	1	0	0	0	0.0270632
7543	535.871	2	0	1	0	0	0	0.0261325
7545	535.905	2	0	1	0	0	0	0.025992
7547	535.938	2	0	1	0	0	0	0.0260495
7549	535.971	2	0	1	0	0	0	0.0264959
7551	536.005	2	0	1	0	0	0	0.0264652
7553	536.038	2	0	1	0	0	0	0.0264471
7555	536.071	2	0	1	0	0	0	0.0263267
7557	536.105	2	0	1	0	0	0	0.0262169
7559	536.138	2	0	1	0	0	0	0.0261597
7561	536.171	2	0	1	0	0	0	0.0261538
7563	536.205	2	0	1	0	0	0	0.0258818
7565	536.238	2	0	1	0	0	0	0.0258284
7567	536.271	2	0	1	0	0	0	0.0256513
7569	536.305	2	0	1	0	0	0	0.0258835
7571	536.338	2	0	1	0	0	0	0.0260945
7573	536.371	2	0	1	0	0	0	0.026023
7575	536.405	2	0	1	0	0	0	0.0258671
7577	536.438	2	0	1	0	0	0	0.0257479
7579	536.471	2	0	1	0	0	0	0.0258072
7581	536.505	2	0	1	0	0	0	0.0256468
7583	536.538	2	0	1	0	0	0	0.0257709
7585	536.571	2	0	1	0	0	0	0.0255864
7587	536.604	2	0	1	0	0	0	0.0255627
7589	536.638	2	0	1	0	0	0	0.025644
7591	536.671	2	0	1	0	0	0	0.025591
7593	536.704	2	0	1	0	0	0	0.0257273
7595	536.738	2	0	1	0	0	0	0.0258208
7597	536.771	2	0	1	0	0	0	0.0257371
7599	536.804	2	0	1	0	0	0	0.0257629
7601	536.838	2	0	1	0	0	0	0.0255774
7603	536.871	2	0	1	0	0	0	0.0260276
7605	536.904	2	0	1	0	0	0	0.0262947
7607	536.938	2	0	1	0	0	0	0.0264132
7609	536.971	2	0	1	0	0	0	0.026394
7611	537.004	2	0	1	0	0	0	0.026181
7613	537.038	2	0	1	0	0	0	0.0261629
7615	537.071	2	0	1	0	0	0	0.0261744
7617	537.104	2	0	1	0	0	0	0.0260251
7619	537.138	2	0	1	0	0	0	0.0260126
7621	537.171	2	0	1	0	0	0	0.0259215
7623	537.204	2	0	1	0	0	0	0.0261465
7625	537.238	2	0	1	0	0	0	0.0262985
7627	537.271	2	0	1	0	0	0	0.0261088
7629	537.304	2	0	1	0	0	0	0.0260607
7631	537.338	2	0	1	0	0	0	0.0264223
7633	537.371	2	0	1	0	0	0	0.0264289
7635	537.404	2	0	1	0	0	0	0.0267065
7637	537.438	2	0	1	0	0	0	0.0265485
7639	537.471	2	0	1	0	0	0	0.0262458
7641	537.504	2	0	1	0	0	0	0.0264704
7643	537.538	2	0	1	0	0	0	0.0263853
7645	537.571	2	0	1	0	0	0	0.0261876
7647	537.604	2	0	1	0	0	0	0.0256928
7649	537.638	2	0	1	0	0	0	0.025086
7651	537.671	2	0	1	0	0	0	0.0251624
7653	537.704	2	0	1	0	0	0	0.0251551
7655	537.738	2	0	1	0	0	0	0.025304
7657	537.771	2	0	1	0	0	0	0.0254836
7659	537.804	2	0	1	0	0	0	0.0256074
7661	537.838	2	0	1	0	0	0	0.0253793
7663	537.871	2	0	1	0	0	0	0.0254905
7665	537.904	2	0	1	0	0	0	0.0262204
7667	537.938	2	0	1	0	0	0	0.0264593
7669	537.971	2	0	1	0	0	0	0.026635
7671	538.004	2	0	1	0	0	0	0.0268658
7673	538.038	2	0	1	0	0	0	0.0269666
7675	538.071	2	0	1	0	0	0	0.0268324
7677	538.104	2	0	1	0	0	0	0.0264659
7679	538.138	2	0	1	0	0	0	0.0260471
7681	538.171	2	0	1	0	0	0	0.0259386
7683	538.204	2	0	1	0	0	0	0.0258926
7685	538.238	2	0	1	0	0	0	0.0258699
7687	538.271	2	0	1	0	0	0	0.0258082
7689	538.304	2	0	1	0	0	0	0.0257793
7691	538.338	2	0	1	0	0	0	0.0263393
7693	538.371	2	0	1	0	0	0	0.0264655
7695	538.404	2	0	1	0	0	0	0.0268383
7697	538.438	2	0	1	0	0	0	0.0268244
7699	538.471	2	0	1	0	0	0	0.0264415
7701	538.504	2	0	1	0	0	0	0.0264533
7703	538.538	2	0	1	0	0	0	0.0261632
7705	538.571	2	0	1	0	0	0	0.0261098
7707	538.604	2	0	1	0	0	0	0.0262315
7709	538.638	2	0	1	0	0	0	0.0261269
7711	538.671	2	0	1	0	0	0	0.0263491
7713	538.704	2	0	1	0	0	0	0.0260509
7715	538.738	2	0	1	0	0	0	0.0261744
7717	538.771	2	0	1	0	0	0	0.0262807
7719	538.804	2	0	1	0	0	0	0.0261618
7721	538.838	2	0	1	0	0	0	0.0261988
7723	538.871	2	0	1	0	0	0	0.0261827
7725	538.904	2	0	1	0	0	0	0.0262357
7727	538.938	2	0	1	0	0	0	0.0264512
7729	538.971	2	0	1	0	0	0	0.0267853
7731	539.004	2	0	1	0	0	0	0.0273697
7733	539.038	2	0	1	0	0	0	0.0279353
7735	539.071	2	0	1	0	0	0	0.0280647
7737	539.104	2	0	1	0	0	0	0.0280992
7739	539.138	2	0	1	0	0	0	0.0279981
7741	539.171	2	0	1	0	0	0	0.0284263
7743	539.204	2	0	1	0	0	0	0.0288723
7745	539.238	2	0	1	0	0	0	0.0286404
7747	539.271	2	0	1	0	0	0	0.0285661
7749	539.304	2	0	1	0	0	0	0.0281208
7751	539.338	2	0	1	0	0	0	0.0277087
7753	539.371	2	0	1	0	0	0	0.0273697
7755	539.404	2	0	1	0	0	0	0.0274161
7757	539.438	2	0	1	0	0	0	0.0272972
7759	539.471	2	0	1	0	0	0	0.0269405
7761	539.504	2	0	1	0	0	0	0.0268435
7763	539.538	2	0	1	0	0	0	0.0268115
7765	539.571	2	0	1	0	0	0	0.0267072
7767	539.604	2	0	1	0	0	0	0.0265876
7769	539.638	2	0	1	0	0	0	0.0264443
7771	539.671	2	0	1	0	0	0	0.0263128
7773	539.704	2	0	1	0	0	0	0.0266915
7775	539.738	2	0	1	0	0	0	0.0264865
7777	539.771	2	0	1	0	0	0	0.0265416
7779	539.804	2	0	1	0	0	0	0.026566
7781	539.838	2	0	1	0	0	0	0.0265286
7783	539.871	2	0	1	0	0	0	0.0265182
7785	539.904	2	0	1	0	0	0	0.0262124
7787	539.938	2	0	1	0	0	0	0.0263585
7789	539.971	2	0	1	0	0	0	0.0266545
7791	540.004	2	0	1	0	0	0	0.0265489
7793	540.038	2	0	1	0	0	0	0.0266605
7795	540.071	2	0	1	0	0	0	0.0266221
7797	540.104	2	0	1	0	0	0	0.0268505
7799	540.138	2	0	1	0	0	0	0.0273258
7801	540.171	2	0	1	0	0	0	0.0276215
7803	540.204	2	0	1	0	0	0	0.028411
7805	540.238	2	0	1	0	0	0	0.0277795
7807	540.271	2	0	1	0	0	0	0.0275354
7809	540.304	2	0	1	0	0	0	0.0265708
7811	540.338	2	0	1	0	0	0	0.0266291
7813	540.371	2	0	1	0	0	0	0.0269799
7815	540.404	2	0	1	0	0	0	0.0275622
7817	540.438	2	0	1	0	0	0	0.0280236
7819	540.471	2	0	1	0	0	0	0.0282349
7821	540.504	2	0	1	0	0	0	0.0280574
7823	540.538	2	0	1	0	0	0	0.0280542
7825	540.571	2	0	1	0	0	0	0.0281456
7827	540.604	2	0	1	0	0	0	0.0281456
7829	540.638	2	0	1	0	0	0	0.0280588
7831	540.671	2	0	1	0	0	0	0.0280529
7833	540.704	2	0	1	0	0	0	0.0282551
7835	540.738	2	0	1	0	0	0	0.028193
7837	540.771	2	0	1	0	0	0	0.0284012
7839	540.804	2	0	1	0	0	0	0.0285735
7841	540.838	2	0	1	0	0	0	0.0285205
7843	540.871	2	0	1	0	0	0	0.0285316
7845	540.904	2	0	1	0	0	0	0.0283325
7847	540.938	2	0	1	0	0	0	0.028222
7849	540.971	2	0	1	0	0	0	0.0280152
7851	541.004	2	0	1	0	0	0	0.027398
7853	541.038	2	0	1	0	0	0	0.0272585
7855	541.071	2	0	1	0	0	0	0.0267448
7857	541.104	2	0	1	0	0	0	0.026515
7859	541.138	2	0	1	0	0	0	0.0263529
7861	541.171	2	0	1	0	0	0	0.0264701
7863	541.204	2	0	1	0	0	0	0.0269325
7865	541.238	2	0	1	0	0	0	0.0273872
7867	541.271	2	0	1	0	0	0	0.0272369
7869	541.304	2	0	1	0	0	0	0.0272296
7871	541.338	2	0	1	0	0	0	0.0277306
7873	541.371	2	0	1	0	0	0	0.0279866
7875	541.404	2	0	1	0	0	0	0.0276253
7877	541.438	2	0	1	0	0	0	0.0273272
7879	541.471	2	0	1	0	0	0	0.0271148
7881	541.504	2	0	1	0	0	0	0.0268847
7883	541.538	2	0	1	0	0	0	0.0267058
7885	541.571	2	0	1	0	0	0	0.026733
7887	541.604	2	0	1	0	0	0	0.0271793
7889	541.638	2	0	1	0	0	0	0.0269147
7891	541.671	2	0	1	0	0	0	0.0266817
7893	541.704	2	0	1	0	0	0	0.0269035
7895	541.738	2	0	1	0	0	0	0.027225
7897	541.771	2	0	1	0	0	0	0.027375
7899	541.804	2	0	1	0	0	0	0.0278217
7901	541.838	2	0	1	0	0	0	0.0279465
7903	541.871	2	0	1	0	0	0	0.0279221
7905	541.904	2	0	1	0	0	0	0.0287862
7907	541.938	2	0	1	0	0	0	0.0289612
7909	541.971	2	0	1	0	0	0	0.0289082
7911	542.004	2	0	1	0	0	0	0.0285208
7913	542.038	2	0	1	0	0	0	0.0272425
7915	542.071	2	0	1	0	0	0	0.0271793
7917	542.104	2	0	1	0	0	0	0.0274991
7919	542.138	2	0	1	0	0	0	0.0273383
7921	542.171	2	0	1	0	0	0	0.0272062
7923	542.204	2	0	1	0	0	0	0.0270594
7925	542.238	2	0	1	0	0	0	0.0268658
7927	542.271	2	0	1	0	0	0	0.0268536
7929	542.304	2	0	1	0	0	0	0.0272989
7931	542.338	2	0	1	0	0	0	0.0271964
7933	542.371	2	0	1	0	0	0	0.0266765
7935	542.404	2	0	1	0	0	0	0.0268118
7937	542.438	2	0	1	0	0	0	0.0271117
7939	542.471	2	0	1	0	0	0	0.0275078
7941	542.504	2	0	1	0	0	0	0.0274506
7943	542.538	2	0	1	0	0	0	0.0273652
7945	542.571	2	0	1	0	0	0	0.0274946
7947	542.604	2	0	1	0	0	0	0.0274067
7949	542.638	2	0	1	0	0	0	0.0275326
7951	542.671	2	0	1	0	0	0	0.0274395
7953	542.704	2	0	1	0	0	0	0.0271155
7955	542.738	2	0	1	0	0	0	0.0273812
7957	542.771	2	0	1	0	0	0	0.0272627
7959	542.804	2	0	1	0	0	0	0.0274186
7961	542.838	2	0	1	0	0	0	0.0277788
7963	542.871	2	0	1	0	0	0	0.0278736
7965	542.904	2	0	1	0	0	0	0.0282457
7967	542.938	2	0	1	0	0	0	0.0280051
7969	542.971	2	0	1	0	0	0	0.0279814
7971	543.004	2	0	1	0	0	0	0.0279043
7973	543.038	2	0	1	0	0	0	0.0281135
7975	543.071	2	0	1	0	0	0	0.0285881
7977	543.104	2	0	1	0	0	0	0.0287558
7979	543.138	2	0	1	0	0	0	0.0291314
7981	543.171	2	0	1	0	0	0	0.029221
7983	543.204	2	0	1	0	0	0	0.0292555
7985	543.238	2	0	1	0	0	0	0.0293368
7987	543.271	2	0	1	0	0	0	0.0289096
7989	543.304	2	0	1	0	0	0	0.0291094
7991	543.338	2	0	1	0	0	0	0.0295363
7993	543.371	2	0	1	0	0	0	0.0295125
7995	543.404	2	0	1	0	0	0	0.0293985
7997	543.438	2	0	1	0	0	0	0.0291652
7999	543.471	2	0	1	0	0	0	0.0290885
8001	543.504	2	0	1	0	0	0	0.0291474
8003	543.538	2	0	1	0	0	0	0.028819
8005	543.571	2	0	1	0	0	0	0.0289853
8007	543.604	2	0	1	0	0	0	0.028653
8009	543.638	2	0	1	0	0	0	0.0285131
8011	543.671	2	0	1	0	0	0	0.0285989
8013	543.704	2	0	1	0	0	0	0.0285076
8015	543.738	2	0	1	0	0	0	0.0282732
8017	543.771	2	0	1	0	0	0	0.0279165
8019	543.804	2	0	1	0	0	0	0.0279409
8021	543.838	2	0	1	0	0	0	0.0275364
8023	543.871	2	0	1	0	0	0	0.0272299
8025	543.904	2	0	1	0	0	0	0.0273492
8027	543.938	2	0	1	0	0	0	0.0274318
8029	543.971	2	0	1	0	0	0	0.027339
8031	544.004	2	0	1	0	0	0	0.0270814
8033	544.038	2	0	1	0	0	0	0.0269223
8035	544.071	2	0	1	0	0	0	0.0269617
8037	544.104	2	0	1	0	0	0	0.0270102
8039	544.138	2	0	1	0	0	0	0.0271166
8041	544.171	2	0	1	0	0	0	0.0272707
8043	544.204	2	0	1	0	0	0	0.0270231
8045	544.238	2	0	1	0	0	0	0.0271211
8047	544.271	2	0	1	0	0	0	0.0270939
8049	544.304	2	0	1	0	0	0	0.027339
8051	544.338	2	0	1	0	0	0	0.0272205
8053	544.371	2	0	1	0	0	0	0.026823
8055	544.404	2	0	1	0	0	0	0.0271776
8057	544.438	2	0	1	0	0	0	0.0281393
8059	544.471	2	0	1	0	0	0	0.0285661
8061	544.504	2	0	1	0	0	0	0.0287241
8063	544.538	2	0	1	0	0	0	0.028456
8065	544.571	2	0	1	0	0	0	0.0281972
8067	544.604	2	0	1	0	0	0	0.0276606
8069	544.638	2	0	1	0	0	0	0.0274342
8071	544.671	2	0	1	0	0	0	0.0281442
8073	544.704	2	0	1	0	0	0	0.0288793
8075	544.738	2	0	1	0	0	0	0.0292175
8077	544.771	2	0	1	0	0	0	0.028949
8079	544.804	2	0	1	0	0	0	0.0288085
8081	544.838	2	0	1	0	0	0	0.0286328
8083	544.871	2	0	1	0	0	0	0.0288517
8085	544.904	2	0	1	0	0	0	0.0293797
8087	544.938	2	0	1	0	0	0	0.0292454
8089	544.971	2	0	1	0	0	0	0.0290986
8091	545.004	2	0	1	0	0	0	0.0290481
8093	545.037	2	0	1	0	0	0	0.0283395
8095	545.071	2	0	1	0	0	0	0.0280685
8097	545.104	2	0	1	0	0	0	0.0276358
8099	545.137	2	0	1	0	0	0	0.027452
8101	545.171	2	0	1	0	0	0	0.0273764
8103	545.204	2	0	1	0	0	0	0.0275866
8105	545.237	2	0	1	0	0	0	0.0277428
8107	545.271	2	0	1	0	0	0	0.0276299
8109	545.304	2	0	1	0	0	0	0.0274834
8111	545.337	2	0	1	0	0	0	0.0273976
8113	545.371	2	0	1	0	0	0	0.027611
8115	545.404	2	0	1	0	0	0	0.0281868
8117	545.437	2	0	1	0	0	0	0.0283688
8119	545.471	2	0	1	0	0	0	0.027837
8121	545.504	2	0	1	0	0	0	0.0273931
8123	545.537	2	0	1	0	0	0	0.0274276
8125	545.571	2	0	1	0	0	0	0.0278391
8127	545.604	2	0	1	0	0	0	0.0278429
8129	545.637	2	0	1	0	0	0	0.0279615
8131	545.671	2	0	1	0	0	0	0.0277104
8133	545.704	2	0	1	0	0	0	0.0275563
8135	545.737	2	0	1	0	0	0	0.0276086
8137	545.771	2	0	1	0	0	0	0.0277495
8139	545.804	2	0	1	0	0	0	0.028125
8141	545.837	2	0	1	0	0	0	0.0280637
8143	545.871	2	0	1	0	0	0	0.0277467
8145	545.904	2	0	1	0	0	0	0.0276637
8147	545.937	2	0	1	0	0	0	0.0278698
8149	545.971	2	0	1	0	0	0	0.0283747
8151	546.004	2	0	1	0	0	0	0.0286418
8153	546.037	2	0	1	0	0	0	0.0281592
8155	546.071	2	0	1	0	0	0	0.0275744
8157	546.104	2	0	1	0	0	0	0.027112
8159	546.137	2	0	1	0	0	0	0.0275929
8161	546.171	2	0	1	0	0	0	0.0281508
8163	546.204	2	0	1	0	0	0	0.0285292
8165	546.237	2	0	1	0	0	0	0.0288444
8167	546.271	2	0	1	0	0	0	0.028335
8169	546.304	2	0	1	0	0	0	0.0278161
8171	546.337	2	0	1	0	0	0	0.0273739
8173	546.371	2	0	1	0	0	0	0.0272658
8175	546.404	2	0	1	0	0	0	0.027573
8177	546.437	2	0	1	0	0	0	0.0271037
8179	546.471	2	0	1	0	0	0	0.0271518
8181	546.504	2	0	1	0	0	0	0.0272895
8183	546.537	2	0	1	0	0	0	0.0271281
8185	546.571	2	0	1	0	0	0	0.027277
8187	546.604	2	0	1	0	0	0	0.0269593
8189	546.637	2	0	1	0	0	0	0.026892
8191	546.671	2	0	1	0	0	0	0.0268582
8193	546.704	2	0	1	0	0	0	0.0268603
8195	546.737	2	0	1	0	0	0	0.0269373
8197	546.771	2	0	1	0	0	0	0.0267309
8199	546.804	2	0	1	0	0	0	0.0265311
8201	546.837	2	0	1	0	0	0	0.0261262
8203	546.871	2	0	1	0	0	0	0.0266772
8205	546.904	2	0	1	0	0	0	0.0272571
8207	546.937	2	0	1	0	0	0	0.0274126
8209	546.971	2	0	1	0	0	0	0.0279601
8211	547.004	2	0	1	0	0	0	0.0281125
8213	547.037	2	0	1	0	0	0	0.0280661
8215	547.071	2	0	1	0	0	0	0.0275458
8217	547.104	2	0	1	0	0	0	0.0277732
8219	547.137	2	0	1	0	0	0	0.0293253
8221	547.171	2	0	1	0	0	0	0.0292904
8223	547.204	2	0	1	0	0	0	0.0293769
8225	547.237	2	0	1	0	0	0	0.0292346
8227	547.271	2	0	1	0	0	0	0.0287415
8229	547.304	2	0	1	0	0	0	0.0283039
8231	547.337	2	0	1	0	0	0	0.0278136
8233	547.371	2	0	1	0	0	0	0.0277286
8235	547.404	2	0	1	0	0	0	0.0276117
8237	547.437	2	0	1	0	0	0	0.0278154
8239	547.471	2	0	1	0	0	0	0.0284786
8241	547.504	2	0	1	0	0	0	0.0282296
8243	547.537	2	0	1	0	0	0	0.0278377
8245	547.571	2	0	1	0	0	0	0.0276909
8247	547.604	2	0	1	0	0	0	0.0279448
8249	547.637	2	0	1	0	0	0	0.0288831
8251	547.671	2	0	1	0	0	0	0.0290146
8253	547.704	2	0	1	0	0	0	0.0287614
8255	547.737	2	0	1	0	0	0	0.0283674
8257	547.771	2	0	1	0	0	0	0.0280103
8259	547.804	2	0	1	0	0	0	0.0283541
8261	547.837	2	0	1	0	0	0	0.0283423
8263	547.871	2	0	1	0	0	0	0.0284399
8265	547.904	2	0	1	0	0	0	0.0281456
8267	547.937	2	0	1	0	0	0	0.02795
8269	547.971	2	0	1	0	0	0	0.0278548
8271	548.004	2	0	1	0	0	0	0.0278081
8273	548.037	2	0	1	0	0	0	0.0279053
8275	548.071	2	0	1	0	0	0	0.0279312
8277	548.104	2	0	1	0	0	0	0.0279291
8279	548.137	2	0	1	0	0	0	0.0279231
8281	548.171	2	0	1	0	0	0	0.0278527
8283	548.204	2	0	1	0	0	0	0.0279824
8285	548.237	2	0	1	0	0	0	0.0279723
8287	548.271	2	0	1	0	0	0	0.0277746
8289	548.304	2	0	1	0	0	0	0.0278551
8291	548.337	2	0	1	0	0	0	0.0277261
8293	548.371	2	0	1	0	0	0	0.0276093
8295	548.404	2	0	1	0	0	0	0.0274674
8297	548.437	2	0	1	0	0	0	0.0274437
8299	548.471	2	0	1	0	0	0	0.0280441
8301	548.504	2	0	1	0	0	0	0.0283866
8303	548.537	2	0	1	0	0	0	0.0283573
8305	548.571	2	0	1	0	0	0	0.0283085
8307	548.604	2	0	1	0	0	0	0.0282928
8309	548.637	2	0	1	0	0	0	0.0288619
8311	548.671	2	0	1	0	0	0	0.0289898
8313	548.704	2	0	1	0	0	0	0.0288727
8315	548.737	2	0	1	0	0	0	0.0288078
8317	548.771	2	0	1	0	0	0	0.0287719
8319	548.804	2	0	1	0	0	0	0.0286742
8321	548.837	2	0	1	0	0	0	0.0279468
8323	548.871	2	0	1	0	0	0	0.0278307
8325	548.904	2	0	1	0	0	0	0.0277261
8327	548.937	2	0	1	0	0	0	0.0276518
8329	548.971	2	0	1	0	0	0	0.0276002
8331	549.004	2	0	1	0	0	0	0.0270569
8333	549.037	2	0	1	0	0	0	0.0270984
8335	549.071	2	0	1	0	0	0	0.0271284
8337	549.104	2	0	1	0	0	0	0.0271452
8339	549.137	2	0	1	0	0	0	0.0275908
8341	549.171	2	0	1	0	0	0	0.0278792
8343	549.204	2	0	1	0	0	0	0.0285365
8345	549.237	2	0	1	0	0	0	0.0283824
8347	549.271	2	0	1	0	0	0	0.0280333
8349	549.304	2	0	1	0	0	0	0.02814
8351	549.337	2	0	1	0	0	0	0.0282492
8353	549.371	2	0	1	0	0	0	0.0282359
8355	549.404	2	0	1	0	0	0	0.0279713
8357	549.437	2	0	1	0	0	0	0.027875
8359	549.471	2	0	1	0	0	0	0.027747
8361	549.504	2	0	1	0	0	0	0.0277027
8363	549.537	2	0	1	0	0	0	0.0277979
8365	549.571	2	0	1	0	0	0	0.02786
8367	549.604	2	0	1	0	0	0	0.0276916
8369	549.637	2	0	1	0	0	0	0.0280898
8371	549.671	2	0	1	0	0	0	0.0282813
8373	549.704	2	0	1	0	0	0	0.0289508
8375	549.737	2	0	1	0	0	0	0.0287893
8377	549.771	2	0	1	0	0	0	0.0286397
8379	549.804	2	0	1	0	0	0	0.0281658
8381	549.837	2	0	1	0	0	0	0.0278251
8383	549.871	2	0	1	0	0	0	0.0279556
8385	549.904	2	0	1	0	0	0	0.0280218
8387	549.937	2	0	1	0	0	0	0.0275019
8389	549.971	2	0	1	0	0	0	0.0275385
8391	550.004	2	0	1	0	0	0	0.027375
8393	550.037	2	0	1	0	0	0	0.0276288
8395	550.071	2	0	1	0	0	0	0.0277781
8397	550.104	2	0	1	0	0	0	0.0276229
8399	550.137	2	0	1	0	0	0	0.0277938
8401	550.171	2	0	1	0	0	0	0.027649
8403	550.204	2	0	1	0	0	0	0.0278604
8405	550.237	2	0	1	0	0	0	0.0277526
8407	550.271	2	0	1	0	0	0	0.0275228
8409	550.304	2	0	1	0	0	0	0.0278436
8411	550.337	2	0	1	0	0	0	0.0276693
8413	550.371	2	0	1	0	0	0	0.0277606
8415	550.404	2	0	1	0	0	0	0.0280274
8417	550.437	2	0	1	0	0	0	0.0280877
8419	550.471	2	0	1	0	0	0	0.028541
8421	550.504	2	0	1	0	0	0	0.0280344
8423	550.537	2	0	1	0	0	0	0.0286094
8425	550.571	2	0	1	0	0	0	0.0289783
8427	550.604	2	0	1	0	0	0	0.0284685
8429	550.637	2	0	1	0	0	0	0.028042
8431	550.671	2	0	1	0	0	0	0.0276773
8433	550.704	2	0	1	0	0	0	0.0275765
8435	550.737	2	0	1	0	0	0	0.0274754
8437	550.771	2	0	1	0	0	0	0.0273115
8439	550.804	2	0	1	0	0	0	0.0275465
8441	550.837	2	0	1	0	0	0	0.0274196
8443	550.871	2	0	1	0	0	0	0.0273711
8445	550.904	2	0	1	0	0	0	0.0273181
8447	550.937	2	0	1	0	0	0	0.0272306
8449	550.971	2	0	1	0	0	0	0.0274388
8451	551.004	2	0	1	0	0	0	0.0274921
8453	551.037	2	0	1	0	0	0	0.0277125
8455	551.071	2	0	1	0	0	0	0.0276058
8457	551.104	2	0	1	0	0	0	0.0268564
8459	551.137	2	0	1	0	0	0	0.0267421
8461	551.171	2	0	1	0	0	0	0.0275521
8463	551.204	2	0	1	0	0	0	0.028214
8465	551.237	2	0	1	0	0	0	0.0287196
8467	551.271	2	0	1	0	0	0	0.0286192
8469	551.304	2	0	1	0	0	0	0.0289169
8471	551.337	2	0	1	0	0	0	0.0287471
8473	551.371	2	0	1	0	0	0	0.028162
8475	551.404	2	0	1	0	0	0	0.0277861
8477	551.437	2	0	1	0	0	0	0.0281554
8479	551.471	2	0	1	0	0	0	0.0286111
8481	551.504	2	0	1	0	0	0	0.0287524
8483	551.537	2	0	1	0	0	0	0.028199
8485	551.571	2	0	1	0	0	0	0.02786
8487	551.604	2	0	1	0	0	0	0.0277683
8489	551.637	2	0	1	0	0	0	0.0277366
8491	551.671	2	0	1	0	0	0	0.0278436
8493	551.704	2	0	1	0	0	0	0.0279116
8495	551.737	2	0	1	0	0	0	0.0280396
8497	551.771	2	0	1	0	0	0	0.0282387
8499	551.804	2	0	1	0	0	0	0.0290083
8501	551.837	2	0	1	0	0	0	0.0294731
8503	551.871	2	0	1	0	0	0	0.0292956
8505	551.904	2	0	1	0	0	0	0.0293218
8507	551.937	2	0	1	0	0	0	0.02928
8509	551.971	2	0	1	0	0	0	0.0291963
8511	552.004	2	0	1	0	0	0	0.028509
8513	552.037	2	0	1	0	0	0	0.028267
8515	552.071	2	0	1	0	0	0	0.0282858
8517	552.104	2	0	1	0	0	0	0.0280975
8519	552.137	2	0	1	0	0	0	0.0287123
8521	552.171	2	0	1	0	0	0	0.028979
8523	552.204	2	0	1	0	0	0	0.0288402
8525	552.237	2	0	1	0	0	0	0.0288061
8527	552.271	2	0	1	0	0	0	0.0289846
8529	552.304	2	0	1	0	0	0	0.0290418
8531	552.337	2	0	1	0	0	0	0.0285655
8533	552.371	2	0	1	0	0	0	0.0279936
8535	552.404	2	0	1	0	0	0	0.027739
8537	552.437	2	0	1	0	0	0	0.0277181
8539	552.471	2	0	1	0	0	0	0.0280989
8541	552.504	2	0	1	0	0	0	0.0282997
8543	552.537	2	0	1	0	0	0	0.0283771
8545	552.571	2	0	1	0	0	0	0.0286519
8547	552.604	2	0	1	0	0	0	0.0282575
8549	552.637	2	0	1	0	0	0	0.027936
8551	552.671	2	0	1	0	0	0	0.0278258
8553	552.704	2	0	1	0	0	0	0.0280005
8555	552.737	2	0	1	0	0	0	0.0282614
8557	552.771	2	0	1	0	0	0	0.0280155
8559	552.804	2	0	1	0	0	0	0.0276389
8561	552.837	2	0	1	0	0	0	0.0277941
8563	552.871	2	0	1	0	0	0	0.0278708
8565	552.904	2	0	1	0	0	0	0.0281693
8567	552.937	2	0	1	0	0	0	0.0278963
8569	552.97	2	0	1	0	0	0	0.0273969
8571	553.004	2	0	1	0	0	0	0.0272853
8573	553.037	2	0	1	0	0	0	0.0271936
8575	553.07	2	0	1	0	0	0	0.0273983
8577	553.104	2	0	1	0	0	0	0.027224
8579	553.137	2	0	1	0	0	0	0.0272543
8581	553.17	2	0	1	0	0	0	0.0271881
8583	553.204	2	0	1	0	0	0	0.0267832
8585	553.237	2	0	1	0	0	0	0.027142
8587	553.27	2	0	1	0	0	0	0.0280522
8589	553.304	2	0	1	0	0	0	0.0285292
8591	553.337	2	0	1	0	0	0	0.0289396
8593	553.37	2	0	1	0	0	0	0.0289842
8595	553.404	2	0	1	0	0	0	0.0290972
8597	553.437	2	0	1	0	0	0	0.0289682
8599	553.47	2	0	1	0	0	0	0.0286118
8601	553.504	2	0	1	0	0	0	0.028721
8603	553.537	2	0	1	0	0	0	0.0291858
8605	553.57	2	0	1	0	0	0	0.0291712
8607	553.604	2	0	1	0	0	0	0.0286523
8609	553.637	2	0	1	0	0	0	0.0277819
8611	553.67	2	0	1	0	0	0	0.027716
8613	553.704	2	0	1	0	0	0	0.0276142
8615	553.737	2	0	1	0	0	0	0.0277777
8617	553.77	2	0	1	0	0	0	0.0276682
8619	553.804	2	0	1	0	0	0	0.0280738
8621	553.837	2	0	1	0	0	0	0.0290568
8623	553.87	2	0	1	0	0	0	0.02894
8625	553.904	2	0	1	0	0	0	0.029002
8627	553.937	2	0	1	0	0	0	0.0282617
8629	553.97	2	0	1	0	0	0	0.0277327
8631	554.004	2	0	1	0	0	0	0.0280717
8633	554.037	2	0	1	0	0	0	0.0276996
8635	554.07	2	0	1	0	0	0	0.0278007
8637	554.104	2	0	1	0	0	0	0.0279796
8639	554.137	2	0	1	0	0	0	0.0280849
8641	554.17	2	0	1	0	0	0	0.0279263
8643	554.204	2	0	1	0	0	0	0.0276909
8645	554.237	2	0	1	0	0	0	0.028049
8647	554.27	2	0	1	0	0	0	0.0280741
8649	554.304	2	0	1	0	0	0	0.0278373
8651	554.337	2	0	1	0	0	0	0.0279636
8653	554.37	2	0	1	0	0	0	0.0278893
8655	554.404	2	0	1	0	0	0	0.028071
8657	554.437	2	0	1	0	0	0	0.027874
8659	554.47	2	0	1	0	0	0	0.0277694
8661	554.504	2	0	1	0	0	0	0.0280452
8663	554.537	2	0	1	0	0	0	0.0281822
8665	554.57	2	0	1	0	0	0	0.0280637
8667	554.604	2	0	1	0	0	0	0.0279496
8669	554.637	2	0	1	0	0	0	0.0278729
8671	554.67	2	0	1	0	0	0	0.0281665
8673	554.704	2	0	1	0	0	0	0.0279566
8675	554.737	2	0	1	0	0	0	0.0280379
8677	554.77	2	0	1	0	0	0	0.0279723
8679	554.804	2	0	1	0	0	0	0.0280232
8681	554.837	2	0	1	0	0	0	0.0282656
8683	554.87	2	0	1	0	0	0	0.0282464
8685	554.904	2	0	1	0	0	0	0.0283552
8687	554.937	2	0	1	0	0	0	0.0283663
8689	554.97	2	0	1	0	0	0	0.0284995
8691	555.004	2	0	1	0	0	0	0.0290306
8693	555.037	2	0	1	0	0	0	0.0290561
8695	555.07	2	0	1	0	0	0	0.0291056
8697	555.104	2	0	1	0	0	0	0.0295533
8699	555.137	2	0	1	0	0	0	0.0297734
8701	555.17	2	0	1	0	0	0	0.0299233
8703	555.204	2	0	1	0	0	0	0.028948
8705	555.237	2	0	1	0	0	0	0.0286858
8707	555.27	2	0	1	0	0	0	0.0288629
8709	555.304	2	0	1	0	0	0	0.0287663
8711	555.337	2	0	1	0	0	0	0.0283904
8713	555.37	2	0	1	0	0	0	0.0282049
8715	555.404	2	0	1	0	0	0	0.0277777
8717	555.437	2	0	1	0	0	0	0.0276975
8719	555.47	2	0	1	0	0	0	0.0273125
8721	555.504	2	0	1	0	0	0	0.0272414
8723	555.537	2	0	1	0	0	0	0.0270329
8725	555.57	2	0	1	0	0	0	0.026929
8727	555.604	2	0	1	0	0	0	0.0270242
8729	555.637	2	0	1	0	0	0	0.0269471
8731	555.67	2	0	1	0	0	0	0.0271326
8733	555.704	2	0	1	0	0	0	0.0270524
8735	555.737	2	0	1	0	0	0	0.0268142
8737	555.77	2	0	1	0	0	0	0.0269293
8739	555.804	2	0	1	0	0	0	0.0268393
8741	555.837	2	0	1	0	0	0	0.0268826
8743	555.87	2	0	1	0	0	0	0.0268167
8745	555.904	2	0	1	0	0	0	0.0266169
8747	555.937	2	0	1	0	0	0	0.0267312
8749	555.97	2	0	1	0	0	0	0.0263986
8751	556.004	2	0	1	0	0	0	0.0261636
8753	556.037	2	0	1	0	0	0	0.0261071
8755	556.07	2	0	1	0	0	0	0.0270514
8757	556.104	2	0	1	0	0	0	0.027301
8759	556.137	2	0	1	0	0	0	0.0272142
8761	556.17	2	0	1	0	0	0	0.0275674
8763	556.204	2	0	1	0	0	0	0.0277826
8765	556.237	2	0	1	0	0	0	0.0279252
8767	556.27	2	0	1	0	0	0	0.0280954
8769	556.304	2	0	1	0	0	0	0.0282983
8771	556.337	2	0	1	0	0	0	0.0282844
8773	556.37	2	0	1	0	0	0	0.0281815
8775	556.404	2	0	1	0	0	0	0.0280243
8777	556.437	2	0	1	0	0	0	0.0282931
8779	556.47	2	0	1	0	0	0	0.0279144
8781	556.504	2	0	1	0	0	0	0.0276463
8783	556.537	2	0	1	0	0	0	0.0277899
8785	556.57	2	0	1	0	0	0	0.0277648
8787	556.604	2	0	1	0	0	0	0.0277634
8789	556.637	2	0	1	0	0	0	0.0278021
8791	556.67	2	0	1	0	0	0	0.0281358
8793	556.704	2	0	1	0	0	0	0.0283688
8795	556.737	2	0	1	0	0	0	0.0291903
8797	556.77	2	0	1	0	0	0	0.0303707
8799	556.804	2	0	1	0	0	0	0.0303822
8801	556.837	2	0	1	0	0	0	0.0302811
8803	556.87	2	0	1	0	0	0	0.0300332
8805	556.904	2	0	1	0	0	0	0.0292395
8807	556.937	2	0	1	0	0	0	0.028691
8809	556.97	2	0	1	0	0	0	0.0284633
8811	557.004	2	0	1	0	0	0	0.0281958
8813	557.037	2	0	1	0	0	0	0.0280393
8815	557.07	2	0	1	0	0	0	0.0279109
8817	557.104	2	0	1	0	0	0	0.0279162
8819	557.137	2	0	1	0	0	0	0.0277739
8821	557.17	2	0	1	0	0	0	0.0279444
8823	557.204	2	0	1	0	0	0	0.0278949
8825	557.237	2	0	1	0	0	0	0.0276483
8827	557.27	2	0	1	0	0	0	0.0275026
8829	557.304	2	0	1	0	0	0	0.0274984
8831	557.337	2	0	1	0	0	0	0.0275633
8833	557.37	2	0	1	0	0	0	0.0276163
8835	557.404	2	0	1	0	0	0	0.0275144
8837	557.437	2	0	1	0	0	0	0.0277156
8839	557.47	2	0	1	0	0	0	0.0275953
8841	557.504	2	0	1	0	0	0	0.0274405
8843	557.537	2	0	1	0	0	0	0.0272822
8845	557.57	2	0	1	0	0	0	0.0274109
8847	557.604	2	0	1	0	0	0	0.0278698
8849	557.637	2	0	1	0	0	0	0.0280312
8851	557.67	2	0	1	0	0	0	0.027988
8853	557.704	2	0	1	0	0	0	0.028208
8855	557.737	2	0	1	0	0	0	0.0278269
8857	557.77	2	0	1	0	0	0	0.0281202
8859	557.804	2	0	1	0	0	0	0.0288259
8861	557.837	2	0	1	0	0	0	0.0292196
8863	557.87	2	0	1	0	0	0	0.0298539
8865	557.904	2	0	1	0	0	0	0.0296684
8867	557.937	2	0	1	0	0	0	0.0289738
8869	557.97	2	0	1	0	0	0	0.0281331
8871	558.004	2	0	1	0	0	0	0.0277924
8873	558.037	2	0	1	0	0	0	0.0277104
8875	558.07	2	0	1	0	0	0	0.0278611
8877	558.104	2	0	1	0	0	0	0.0284061
8879	558.137	2	0	1	0	0	0	0.0291063
8881	558.17	2	0	1	0	0	0	0.0292266
8883	558.204	2	0	1	0	0	0	0.0294773
8885	558.237	2	0	1	0	0	0	0.0293682
8887	558.27	2	0	1	0	0	0	0.0291802
8889	558.304	2	0	1	0	0	0	0.0290177
8891	558.337	2	0	1	0	0	0	0.0286185
8893	558.37	2	0	1	0	0	0	0.0286837
8895	558.404	2	0	1	0	0	0	0.028282
8897	558.437	2	0	1	0	0	0	0.0280061
8899	558.47	2	0	1	0	0	0	0.0280515
8901	558.504	2	0	1	0	0	0	0.0281041
8903	558.537	2	0	1	0	0	0	0.0282861
8905	558.57	2	0	1	0	0	0	0.0280954
8907	558.604	2	0	1	0	0	0	0.0282286
8909	558.637	2	0	1	0	0	0	0.0280368
8911	558.67	2	0	1	0	0	0	0.0277725
8913	558.704	2	0	1	0	0	0	0.027715
8915	558.737	2	0	1	0	0	0	0.0274859
8917	558.77	2	0	1	0	0	0	0.0275026
8919	558.804	2	0	1	0	0	0	0.0276874
8921	558.837	2	0	1	0	0	0	0.0275664
8923	558.87	2	0	1	0	0	0	0.0278035
8925	558.904	2	0	1	0	0	0	0.0278426
8927	558.937	2	0	1	0	0	0	0.0278272
8929	558.97	2	0	1	0	0	0	0.027898
8931	559.004	2	0	1	0	0	0	0.0276093
8933	559.037	2	0	1	0	0	0	0.0277334
8935	559.07	2	0	1	0	0	0	0.0274416
8937	559.104	2	0	1	0	0	0	0.0274206
8939	559.137	2	0	1	0	0	0	0.0273987
8941	559.17	2	0	1	0	0	0	0.0271814
8943	559.204	2	0	1	0	0	0	0.0273662
8945	559.237	2	0	1	0	0	0	0.0271874
8947	559.27	2	0	1	0	0	0	0.0269931
8949	559.304	2	0	1	0	0	0	0.0269119
8951	559.337	2	0	1	0	0	0	0.0269199
8953	559.37	2	0	1	0	0	0	0.0268763
8955	559.404	2	0	1	0	0	0	0.0268836
8957	559.437	2	0	1	0	0	0	0.0268746
8959	559.47	2	0	1	0	0	0	0.0270036
8961	559.504	2	0	1	0	0	0	0.0269244
8963	559.537	2	0	1	0	0	0	0.0270454
8965	559.57	2	0	1	0	0	0	0.0269325
8967	559.604	2	0	1	0	0	0	0.0269241
8969	559.637	2	0	1	0	0	0	0.0268606
8971	559.67	2	0	1	0	0	0	0.0268557
8973	559.704	2	0	1	0	0	0	0.0266898
8975	559.737	2	0	1	0	0	0	0.0265321
8977	559.77	2	0	1	0	0	0	0.0263885
8979	559.804	2	0	1	0	0	0	0.0265157
8981	559.837	2	0	1	0	0	0	0.0267539
8983	559.87	2	0	1	0	0	0	0.0270273
8985	559.904	2	0	1	0	0	0	0.0270995
8987	559.937	2	0	1	0	0	0	0.0275043
8989	559.97	2	0	1	0	0	0	0.0276278
8991	560.004	2	0	1	0	0	0	0.02715
8993	560.037	2	0	1	0	0	0	0.0273976
8995	560.07	2	0	1	0	0	0	0.0278035
8997	560.104	2	0	1	0	0	0	0.0279629
8999	560.137	2	0	1	0	0	0	0.028405
9001	560.17	2	0	1	0	0	0	0.0283789
9003	560.204	2	0	1	0	0	0	0.0283133
9005	560.237	2	0	1	0	0	0	0.0280954
9007	560.27	2	0	1	0	0	0	0.027981
9009	560.304	2	0	1	0	0	0	0.0280127
9011	560.337	2	0	1	0	0	0	0.0282516
9013	560.37	2	0	1	0	0	0	0.0287813
9015	560.404	2	0	1	0	0	0	0.0293103
9017	560.437	2	0	1	0	0	0	0.0296084
9019	560.47	2	0	1	0	0	0	0.0297064
9021	560.504	2	0	1	0	0	0	0.0292618
9023	560.537	2	0	1	0	0	0	0.0291579
9025	560.57	2	0	1	0	0	0	0.0296185
9027	560.604	2	0	1	0	0	0	0.0293044
9029	560.637	2	0	1	0	0	0	0.0291607
9031	560.67	2	0	1	0	0	0	0.0288577
9033	560.704	2	0	1	0	0	0	0.0284242
9035	560.737	2	0	1	0	0	0	0.0281362
9037	560.77	2	0	1	0	0	0	0.0279587
9039	560.804	2	0	1	0	0	0	0.0279622
9041	560.837	2	0	1	0	0	0	0.0278632
9043	560.87	2	0	1	0	0	0	0.0275284
9045	560.904	2	0	1	0	0	0	0.0273934
9047	560.937	2	0	1	0	0	0	0.0272798
9049	560.97	2	0	1	0	0	0	0.0274977
9051	561.004	2	0	1	0	0	0	0.0274548
9053	561.037	2	0	1	0	0	0	0.0274294
9055	561.07	2	0	1	0	0	0	0.027535
9057	561.104	2	0	1	0	0	0	0.0273488
9059	561.137	2	0	1	0	0	0	0.0273471
9061	561.17	2	0	1	0	0	0	0.0274224
9063	561.204	2	0	1	0	0	0	0.0276619
9065	561.237	2	0	1	0	0	0	0.0281181
9067	561.27	2	0	1	0	0	0	0.028721
9069	561.304	2	0	1	0	0	0	0.0295802
9071	561.337	2	0	1	0	0	0	0.0297926
9073	561.37	2	0	1	0	0	0	0.0298138
9075	561.404	2	0	1	0	0	0	0.0299156
9077	561.437	2	0	1	0	0	0	0.0296475
9079	561.47	2	0	1	0	0	0	0.0293072
9081	561.503	2	0	1	0	0	0	0.0291506
9083	561.537	2	0	1	0	0	0	0.0287565
9085	561.57	2	0	1	0	0	0	0.0287004
9087	561.603	2	0	1	0	0	0	0.0283391
9089	561.637	2	0	1	0	0	0	0.0280417
9091	561.67	2	0	1	0	0	0	0.0280455
9093	561.703	2	0	1	0	0	0	0.027814
9095	561.737	2	0	1	0	0	0	0.0277582
9097	561.77	2	0	1	0	0	0	0.0276564
9099	561.803	2	0	1	0	0	0	0.0276696
9101	561.837	2	0	1	0	0	0	0.0276121
9103	561.87	2	0	1	0	0	0	0.027753
9105	561.903	2	0	1	0	0	0	0.027791
9107	561.937	2	0	1	0	0	0	0.0288235
9109	561.97	2	0	1	0	0	0	0.0291084
9111	562.003	2	0	1	0	0	0	0.0293738
9113	562.037	2	0	1	0	0	0	0.0290348
9115	562.07	2	0	1	0	0	0	0.0289543
9117	562.103	2	0	1	0	0	0	0.0290941
9119	562.137	2	0	1	0	0	0	0.0284525
9121	562.17	2	0	1	0	0	0	0.0281219
9123	562.203	2	0	1	0	0	0	0.027821
9125	562.237	2	0	1	0	0	0	0.0279995
9127	562.27	2	0	1	0	0	0	0.027906
9129	562.303	2	0	1	0	0	0	0.0277495
9131	562.337	2	0	1	0	0	0	0.0276076
9133	562.37	2	0	1	0	0	0	0.0273108
9135	562.403	2	0	1	0	0	0	0.0269778
9137	562.437	2	0	1	0	0	0	0.0270346
9139	562.47	2	0	1	0	0	0	0.0271138
9141	562.503	2	0	1	0	0	0	0.0274367
9143	562.537	2	0	1	0	0	0	0.0276986
9145	562.57	2	0	1	0	0	0	0.0274806
9147	562.603	2	0	1	0	0	0	0.0276494
9149	562.637	2	0	1	0	0	0	0.0279256
9151	562.67	2	0	1	0	0	0	0.0276644
9153	562.703	2	0	1	0	0	0	0.0284479
9155	562.737	2	0	1	0	0	0	0.0283991
9157	562.77	2	0	1	0	0	0	0.0286237
9159	562.803	2	0	1	0	0	0	0.0285822
9161	562.837	2	0	1	0	0	0	0.0287635
9163	562.87	2	0	1	0	0	0	0.0284026
9165	562.903	2	0	1	0	0	0	0.0285006
9167	562.937	2	0	1	0	0	0	0.0287234
9169	562.97	2	0	1	0	0	0	0.0283914
9171	563.003	2	0	1	0	0	0	0.0284992
9173	563.037	2	0	1	0	0	0	0.0282893
9175	563.07	2	0	1	0	0	0	0.0280957
9177	563.103	2	0	1	0	0	0	0.028352
9179	563.137	2	0	1	0	0	0	0.0278593
9181	563.17	2	0	1	0	0	0	0.0276808
9183	563.203	2	0	1	0	0	0	0.027836
9185	563.237	2	0	1	0	0	0	0.0281114
9187	563.27	2	0	1	0	0	0	0.028396
9189	563.303	2	0	1	0	0	0	0.0283092
9191	563.337	2	0	1	0	0	0	0.0280699
9193	563.37	2	0	1	0	0	0	0.0280072
9195	563.403	2	0	1	0	0	0	0.0276327
9197	563.437	2	0	1	0	0	0	0.0273098
9199	563.47	2	0	1	0	0	0	0.0270242
9201	563.503	2	0	1	0	0	0	0.0267916
9203	563.537	2	0	1	0	0	0	0.0271654
9205	563.57	2	0	1	0	0	0	0.0272993
9207	563.603	2	0	1	0	0	0	0.0276417
9209	563.637	2	0	1	0	0	0	0.0274503
9211	563.67	2	0	1	0	0	0	0.0273847
9213	563.703	2	0	1	0	0	0	0.0275559
9215	563.737	2	0	1	0	0	0	0.0272766
9217	563.77	2	0	1	0	0	0	0.0272358
9219	563.803	2	0	1	0	0	0	0.0274367
9221	563.837	2	0	1	0	0	0	0.0278904
9223	563.87	2	0	1	0	0	0	0.0282391
9225	563.903	2	0	1	0	0	0	0.0281111
9227	563.937	2	0	1	0	0	0	0.0278119
9229	563.97	2	0	1	0	0	0	0.027611
9231	564.003	2	0	1	0	0	0	0.0280563
9233	564.037	2	0	1	0	0	0	0.0283817
9235	564.07	2	0	1	0	0	0	0.0285159
9237	564.103	2	0	1	0	0	0	0.0286708
9239	564.137	2	0	1	0	0	0	0.0283538
9241	564.17	2	0	1	0	0	0	0.0276864
9243	564.203	2	0	1	0	0	0	0.0274088
9245	564.237	2	0	1	0	0	0	0.0276766
9247	564.27	2	0	1	0	0	0	0.0273948
9249	564.303	2	0	1	0	0	0	0.0274412
9251	564.337	2	0	1	0	0	0	0.0275218
9253	564.37	2	0	1	0	0	0	0.0281857
9255	564.403	2	0	1	0	0	0	0.0293037
9257	564.437	2	0	1	0	0	0	0.0289515
9259	564.47	2	0	1	0	0	0	0.0282432
9261	564.503	2	0	1	0	0	0	0.027995
9263	564.537	2	0	1	0	0	0	0.0279702
9265	564.57	2	0	1	0	0	0	0.0279454
9267	564.603	2	0	1	0	0	0	0.0276389
9269	564.637	2	0	1	0	0	0	0.0277181
9271	564.67	2	0	1	0	0	0	0.0279123
9273	564.703	2	0	1	0	0	0	0.0279158
9275	564.737	2	0	1	0	0	0	0.0282994
9277	564.77	2	0	1	0	0	0	0.0281383
9279	564.803	2	0	1	0	0	0	0.0279646
9281	564.837	2	0	1	0	0	0	0.0276749
9283	564.87	2	0	1	0	0	0	0.0275674
9285	564.903	2	0	1	0	0	0	0.0276107
9287	564.937	2	0	1	0	0	0	0.0275078
9289	564.97	2	0	1	0	0	0	0.0277373
9291	565.003	2	0	1	0	0	0	0.0281247
9293	565.037	2	0	1	0	0	0	0.0285442
9295	565.07	2	0	1	0	0	0	0.0291903
9297	565.103	2	0	1	0	0	0	0.0290651
9299	565.137	2	0	1	0	0	0	0.0281093
9301	565.17	2	0	1	0	0	0	0.027723
9303	565.203	2	0	1	0	0	0	0.0277327
9305	565.237	2	0	1	0	0	0	0.0280926
9307	565.27	2	0	1	0	0	0	0.0279406
9309	565.303	2	0	1	0	0	0	0.0277324
9311	565.337	2	0	1	0	0	0	0.0280026
9313	565.37	2	0	1	0	0	0	0.028577
9315	565.403	2	0	1	0	0	0	0.0290278
9317	565.437	2	0	1	0	0	0	0.0291534
9319	565.47	2	0	1	0	0	0	0.0288211
9321	565.503	2	0	1	0	0	0	0.0293486
9323	565.537	2	0	1	0	0	0	0.0293999
9325	565.57	2	0	1	0	0	0	0.0296367
9327	565.603	2	0	1	0	0	0	0.0286962
9329	565.637	2	0	1	0	0	0	0.0283472
9331	565.67	2	0	1	0	0	0	0.02829
9333	565.703	2	0	1	0	0	0	0.028487
9335	565.737	2	0	1	0	0	0	0.0282129
9337	565.77	2	0	1	0	0	0	0.0280211
9339	565.803	2	0	1	0	0	0	0.0275654
9341	565.837	2	0	1	0	0	0	0.0276588
9343	565.87	2	0	1	0	0	0	0.0274688
9345	565.903	2	0	1	0	0	0	0.0273035
9347	565.937	2	0	1	0	0	0	0.0273052
9349	565.97	2	0	1	0	0	0	0.0271002
9351	566.003	2	0	1	0	0	0	0.0271867
9353	566.037	2	0	1	0	0	0	0.0269712
9355	566.07	2	0	1	0	0	0	0.0270911
9357	566.103	2	0	1	0	0	0	0.0272205
9359	566.137	2	0	1	0	0	0	0.0270555
9361	566.17	2	0	1	0	0	0	0.0270276
9363	566.203	2	0	1	0	0	0	0.027141
9365	566.237	2	0	1	0	0	0	0.0267804
9367	566.27	2	0	1	0	0	0	0.0263745
9369	566.303	2	0	1	0	0	0	0.0266507
9371	566.337	2	0	1	0	0	0	0.027512
9373	566.37	2	0	1	0	0	0	0.0278823
9375	566.403	2	0	1	0	0	0	0.0284563
9377	566.437	2	0	1	0	0	0	0.0290352
9379	566.47	2	0	1	0	0	0	0.0292346
9381	566.503	2	0	1	0	0	0	0.0290097
9383	566.537	2	0	1	0	0	0	0.0286223
9385	566.57	2	0	1	0	0	0	0.0277422
9387	566.603	2	0	1	0	0	0	0.0279193
9389	566.637	2	0	1	0	0	0	0.0277115
9391	566.67	2	0	1	0	0	0	0.0275444
9393	566.703	2	0	1	0	0	0	0.0279256
9395	566.737	2	0	1	0	0	0	0.027829
9397	566.77	2	0	1	0	0	0	0.0278506
9399	566.803	2	0	1	0	0	0	0.0276215
9401	566.837	2	0	1	0	0	0	0.0275406
9403	566.87	2	0	1	0	0	0	0.0276142
9405	566.903	2	0	1	0	0	0	0.0272592
9407	566.937	2	0	1	0	0	0	0.0273561
9409	566.97	2	0	1	0	0	0	0.0275019
9411	567.003	2	0	1	0	0	0	0.0274119
9413	567.037	2	0	1	0	0	0	0.0276567
9415	567.07	2	0	1	0	0	0	0.0278101
9417	567.103	2	0	1	0	0	0	0.027989
9419	567.137	2	0	1	0	0	0	0.0275131
9421	567.17	2	0	1	0	0	0	0.0274318
9423	567.203	2	0	1	0	0	0	0.0282865
9425	567.237	2	0	1	0	0	0	0.0280082
9427	567.27	2	0	1	0	0	0	0.0276438
9429	567.303	2	0	1	0	0	0	0.0278921
9431	567.337	2	0	1	0	0	0	0.028199
9433	567.37	2	0	1	0	0	0	0.028449
9435	567.403	2	0	1	0	0	0	0.0276829
9437	567.437	2	0	1	0	0	0	0.0271288
9439	567.47	2	0	1	0	0	0	0.0276759
9441	567.503	2	0	1	0	0	0	0.0278851
9443	567.537	2	0	1	0	0	0	0.0280197
9445	567.57	2	0	1	0	0	0	0.0279214
9447	567.603	2	0	1	0	0	0	0.0283363
9449	567.637	2	0	1	0	0	0	0.0291984
9451	567.67	2	0	1	0	0	0	0.0287597
9453	567.703	2	0	1	0	0	0	0.0282087
9455	567.737	2	0	1	0	0	0	0.0278349
9457	567.77	2	0	1	0	0	0	0.0276107
9459	567.803	2	0	1	0	0	0	0.0275769
9461	567.837	2	0	1	0	0	0	0.0275985
9463	567.87	2	0	1	0	0	0	0.0274593
9465	567.903	2	0	1	0	0	0	0.0275964
9467	567.937	2	0	1	0	0	0	0.0273359
9469	567.97	2	0	1	0	0	0	0.0274165
9471	568.003	2	0	1	0	0	0	0.0273471
9473	568.037	2	0	1	0	0	0	0.0272146
9475	568.07	2	0	1	0	0	0	0.0274771
9477	568.103	2	0	1	0	0	0	0.0273345
9479	568.137	2	0	1	0	0	0	0.0271085
9481	568.17	2	0	1	0	0	0	0.0272644
9483	568.203	2	0	1	0	0	0	0.0278562
9485	568.237	2	0	1	0	0	0	0.0283064
9487	568.27	2	0	1	0	0	0	0.0284016
9489	568.303	2	0	1	0	0	0	0.0281278
9491	568.337	2	0	1	0	0	0	0.0277163
9493	568.37	2	0	1	0	0	0	0.0273139
9495	568.403	2	0	1	0	0	0	0.0272191
9497	568.437	2	0	1	0	0	0	0.027331
9499	568.47	2	0	1	0	0	0	0.0272271
9501	568.503	2	0	1	0	0	0	0.0273296
9503	568.537	2	0	1	0	0	0	0.0272463
9505	568.57	2	0	1	0	0	0	0.0274524
9507	568.603	2	0	1	0	0	0	0.0274468
9509	568.637	2	0	1	0	0	0	0.0278687
9511	568.67	2	0	1	0	0	0	0.0278698
9513	568.703	2	0	1	0	0	0	0.0272309
9515	568.737	2	0	1	0	0	0	0.0273575
9517	568.77	2	0	1	0	0	0	0.0277191
9519	568.803	2	0	1	0	0	0	0.02758
9521	568.837	2	0	1	0	0	0	0.0279601
9523	568.87	2	0	1	0	0	0	0.0277348
9525	568.903	2	0	1	0	0	0	0.027859
9527	568.937	2	0	1	0	0	0	0.0287321
9529	568.97	2	0	1	0	0	0	0.0287332
9531	569.003	2	0	1	0	0	0	0.0285355
9533	569.037	2	0	1	0	0	0	0.0277631
9535	569.07	2	0	1	0	0	0	0.0275598
9537	569.103	2	0	1	0	0	0	0.0279287
9539	569.137	2	0	1	0	0	0	0.0278621
9541	569.17	2	0	1	0	0	0	0.0278778
9543	569.203	2	0	1	0	0	0	0.0280762
9545	569.237	2	0	1	0	0	0	0.0280947
9547	569.27	2	0	1	0	0	0	0.0286537
9549	569.303	2	0	1	0	0	0	0.0291213
9551	569.337	2	0	1	0	0	0	0.0291928
9553	569.37	2	0	1	0	0	0	0.0287848
9555	569.403	2	0	1	0	0	0	0.028214
9557	569.437	2	0	1	0	0	0	0.0283625
9559	569.47	2	0	1	0	0	0	0.0290515
9561	569.503	2	0	1	0	0	0	0.0290188
9563	569.537	2	0	1	0	0	0	0.0286537
9565	569.57	2	0	1	0	0	0	0.0281034
9567	569.603	2	0	1	0	0	0	0.0277571
9569	569.637	2	0	1	0	0	0	0.0275458
9571	569.67	2	0	1	0	0	0	0.0276271
9573	569.703	2	0	1	0	0	0	0.0278485
9575	569.737	2	0	1	0	0	0	0.0279127
9577	569.77	2	0	1	0	0	0	0.027747
9579	569.803	2	0	1	0	0	0	0.0277788
9581	569.837	2	0	1	0	0	0	0.0274681
9583	569.87	2	0	1	0	0	0	0.0276518
9585	569.903	2	0	1	0	0	0	0.0274677
9587	569.937	2	0	1	0	0	0	0.0278813
9589	569.97	2	0	1	0	0	0	0.0280026
9591	570.003	2	0	1	0	0	0	0.0273533
9593	570.036	2	0	1	0	0	0	0.0271964
9595	570.07	2	0	1	0	0	0	0.026982
9597	570.103	2	0	1	0	0	0	0.0269429
9599	570.136	2	0	1	0	0	0	0.0269391
9601	570.17	2	0	1	0	0	0	0.0266612
9603	570.203	2	0	1	0	0	0	0.0269136
9605	570.236	2	0	1	0	0	0	0.026772
9607	570.27	2	0	1	0	0	0	0.0267006
9609	570.303	2	0	1	0	0	0	0.0267222
9611	570.336	2	0	1	0	0	0	0.0264488
9613	570.37	2	0	1	0	0	0	0.0265527
9615	570.403	2	0	1	0	0	0	0.0264753
9617	570.436	2	0	1	0	0	0	0.0264547
9619	570.47	2	0	1	0	0	0	0.0264652
9621	570.503	2	0	1	0	0	0	0.0263658
9623	570.536	2	0	1	0	0	0	0.0265987
9625	570.57	2	0	1	0	0	0	0.0271964
9627	570.603	2	0	1	0	0	0	0.0276121
9629	570.636	2	0	1	0	0	0	0.0281358
9631	570.67	2	0	1	0	0	0	0.0280284
9633	570.703	2	0	1	0	0	0	0.0278046
9635	570.736	2	0	1	0	0	0	0.0270897
9637	570.77	2	0	1	0	0	0	0.0269335
9639	570.803	2	0	1	0	0	0	0.0270151
9641	570.836	2	0	1	0	0	0	0.027142
9643	570.87	2	0	1	0	0	0	0.0272934
9645	570.903	2	0	1	0	0	0	0.0272794
9647	570.936	2	0	1	0	0	0	0.027322
9649	570.97	2	0	1	0	0	0	0.0272306
9651	571.003	2	0	1	0	0	0	0.0271664
9653	571.036	2	0	1	0	0	0	0.0267769
9655	571.07	2	0	1	0	0	0	0.0265949
9657	571.103	2	0	1	0	0	0	0.027028
9659	571.136	2	0	1	0	0	0	0.027368
9661	571.17	2	0	1	0	0	0	0.0275577
9663	571.203	2	0	1	0	0	0	0.0276316
9665	571.236	2	0	1	0	0	0	0.0277544
9667	571.27	2	0	1	0	0	0	0.0274862
9669	571.303	2	0	1	0	0	0	0.0277265
9671	571.336	2	0	1	0	0	0	0.0289166
9673	571.37	2	0	1	0	0	0	0.0279883
9675	571.403	2	0	1	0	0	0	0.027754
9677	571.436	2	0	1	0	0	0	0.0276452
9679	571.47	2	0	1	0	0	0	0.0280375
9681	571.503	2	0	1	0	0	0	0.0281725
9683	571.536	2	0	1	0	0	0	0.02761
9685	571.57	2	0	1	0	0	0	0.0274559
9687	571.603	2	0	1	0	0	0	0.0276675
9689	571.636	2	0	1	0	0	0	0.0279747
9691	571.67	2	0	1	0	0	0	0.0279901
9693	571.703	2	0	1	0	0	0	0.0275674
9695	571.736	2	0	1	0	0	0	0.0275845
9697	571.77	2	0	1	0	0	0	0.0277076
9699	571.803	2	0	1	0	0	0	0.0279918
9701	571.836	2	0	1	0	0	0	0.0281533
9703	571.87	2	0	1	0	0	0	0.0280183
9705	571.903	2	0	1	0	0	0	0.027564
9707	571.936	2	0	1	0	0	0	0.0275957
9709	571.97	2	0	1	0	0	0	0.0275253
9711	572.003	2	0	1	0	0	0	0.0277052
9713	572.036	2	0	1	0	0	0	0.0277024
9715	572.07	2	0	1	0	0	0	0.0277122
9717	572.103	2	0	1	0	0	0	0.0275688
9719	572.136	2	0	1	0	0	0	0.0278834
9721	572.17	2	0	1	0	0	0	0.02808
9723	572.203	2	0	1	0	0	0	0.0280542
9725	572.236	2	0	1	0	0	0	0.0284706
9727	572.27	2	0	1	0	0	0	0.0289121
9729	572.303	2	0	1	0	0	0	0.0287503
9731	572.336	2	0	1	0	0	0	0.0293804
9733	572.37	2	0	1	0	0	0	0.0300112
9735	572.403	2	0	1	0	0	0	0.0298574
9737	572.436	2	0	1	0	0	0	0.0298616
9739	572.47	2	0	1	0	0	0	0.0296614
9741	572.503	2	0	1	0	0	0	0.0297643
9743	572.536	2	0	1	0	0	0	0.0292712
9745	572.57	2	0	1	0	0	0	0.027957
9747	572.603	2	0	1	0	0	0	0.0279831
9749	572.636	2	0	1	0	0	0	0.02863
9751	572.67	2	0	1	0	0	0	0.0292974
9753	572.703	2	0	1	0	0	0	0.0297507
9755	572.736	2	0	1	0	0	0	0.0299212
9757	572.77	2	0	1	0	0	0	0.0295031
9759	572.803	2	0	1	0	0	0	0.0289278
9761	572.836	2	0	1	0	0	0	0.0286031
9763	572.87	2	0	1	0	0	0	0.0283123
9765	572.903	2	0	1	0	0	0	0.0278879
9767	572.936	2	0	1	0	0	0	0.0275845
9769	572.97	2	0	1	0	0	0	0.0276613
9771	573.003	2	0	1	0	0	0	0.027746
9773	573.036	2	0	1	0	0	0	0.0281195
9775	573.07	2	0	1	0	0	0	0.0274723
9777	573.103	2	0	1	0	0	0	0.0272686
9779	573.136	2	0	1	0	0	0	0.0275117
9781	573.17	2	0	1	0	0	0	0.0272759
9783	573.203	2	0	1	0	0	0	0.0271466
9785	573.236	2	0	1	0	0	0	0.0270698
9787	573.27	2	0	1	0	0	0	0.0269366
9789	573.303	2	0	1	0	0	0	0.0269583
9791	573.336	2	0	1	0	0	0	0.0268836
9793	573.37	2	0	1	0	0	0	0.0270057
9795	573.403	2	0	1	0	0	0	0.0270678
9797	573.436	2	0	1	0	0	0	0.026779
9799	573.47	2	0	1	0	0	0	0.0267724
9801	573.503	2	0	1	0	0	0	0.0267466
9803	573.536	2	0	1	0	0	0	0.0267727
9805	573.57	2	0	1	0	0	0	0.026929
9807	573.603	2	0	1	0	0	0	0.0268083
9809	573.636	2	0	1	0	0	0	0.0270325
9811	573.67	2	0	1	0	0	0	0.0267567
9813	573.703	2	0	1	0	0	0	0.0265792
9815	573.736	2	0	1	0	0	0	0.0263512
9817	573.77	2	0	1	0	0	0	0.0263714
9819	573.803	2	0	1	0	0	0	0.0268986
9821	573.836	2	0	1	0	0	0	0.0276393
9823	573.87	2	0	1	0	0	0	0.0278175
9825	573.903	2	0	1	0	0	0	0.0280811
9827	573.936	2	0	1	0	0	0	0.0278844
9829	573.97	2	0	1	0	0	0	0.0281003
9831	574.003	2	0	1	0	0	0	0.0284521
9833	574.036	2	0	1	0	0	0	0.0285933
9835	574.07	2	0	1	0	0	0	0.0288814
9837	574.103	2	0	1	0	0	0	0.028275
9839	574.136	2	0	1	0	0	0	0.0277376
9841	574.17	2	0	1	0	0	0	0.0277352
9843	574.203	2	0	1	0	0	0	0.0280626
9845	574.236	2	0	1	0	0	0	0.0287255
9847	574.27	2	0	1	0	0	0	0.0290554
9849	574.303	2	0	1	0	0	0	0.0283838
9851	574.336	2	0	1	0	0	0	0.0279026
9853	574.37	2	0	1	0	0	0	0.0281463
9855	574.403	2	0	1	0	0	0	0.0284999
9857	574.436	2	0	1	0	0	0	0.0281079
9859	574.47	2	0	1	0	0	0	0.0280832
9861	574.503	2	0	1	0	0	0	0.0282314
9863	574.536	2	0	1	0	0	0	0.027648
9865	574.57	2	0	1	0	0	0	0.0273805
9867	574.603	2	0	1	0	0	0	0.0273084
9869	574.636	2	0	1	0	0	0	0.0276062
9871	574.67	2	0	1	0	0	0	0.0278963
9873	574.703	2	0	1	0	0	0	0.0280905
9875	574.736	2	0	1	0	0	0	0.0286017
9877	574.77	2	0	1	0	0	0	0.0290355
9879	574.803	2	0	1	0	0	0	0.0280689
9881	574.836	2	0	1	0	0	0	0.0276114
9883	574.87	2	0	1	0	0	0	0.0278255
9885	574.903	2	0	1	0	0	0	0.0274032
9887	574.936	2	0	1	0	0	0	0.0277261
9889	574.97	2	0	1	0	0	0	0.0277582
9891	575.003	2	0	1	0	0	0	0.0281773
9893	575.036	2	0	1	0	0	0	0.0276679
9895	575.07	2	0	1	0	0	0	0.0270426
9897	575.103	2	0	1	0	0	0	0.0270827
9899	575.136	2	0	1	0	0	0	0.0269251
9901	575.17	2	0	1	0	0	0	0.0271703
9903	575.203	2	0	1	0	0	0	0.027641
9905	575.236	2	0	1	0	0	0	0.0273854
9907	575.27	2	0	1	0	0	0	0.0271999
9909	575.303	2	0	1	0	0	0	0.0271623
9911	575.336	2	0	1	0	0	0	0.0272815
9913	575.37	2	0	1	0	0	0	0.027187
9915	575.403	2	0	1	0	0	0	0.0269025
9917	575.436	2	0	1	0	0	0	0.0270134
9919	575.47	2	0	1	0	0	0	0.0270025
9921	575.503	2	0	1	0	0	0	0.0269907
9923	575.536	2	0	1	0	0	0	0.0272568
9925	575.57	2	0	1	0	0	0	0.0270576
9927	575.603	2	0	1	0	0	0	0.0269422
9929	575.636	2	0	1	0	0	0	0.0265524
9931	575.67	2	0	1	0	0	0	0.0264572
9933	575.703	2	0	1	0	0	0	0.0266249
9935	575.736	2	0	1	0	0	0	0.0265646
9937	575.77	2	0	1	0	0	0	0.0268878
9939	575.803	2	0	1	0	0	0	0.0271319
9941	575.836	2	0	1	0	0	0	0.0270158
9943	575.87	2	0	1	0	0	0	0.0272766
9945	575.903	2	0	1	0	0	0	0.0272937
9947	575.936	2	0	1	0	0	0	0.0270008
9949	575.97	2	0	1	0	0	0	0.027134
9951	576.003	2	0	1	0	0	0	0.0272561
9953	576.036	2	0	1	0	0	0	0.0272452
9955	576.07	2	0	1	0	0	0	0.0272414
9957	576.103	2	0	1	0	0	0	0.0271762
9959	576.136	2	0	1	0	0	0	0.0274531
9961	576.17	2	0	1	0	0	0	0.0273687
9963	576.203	2	0	1	0	0	0	0.0274182
9965	576.236	2	0	1	0	0	0	0.0275273
9967	576.27	2	0	1	0	0	0	0.0271455
9969	576.303	2	0	1	0	0	0	0.0275716
9971	576.336	2	0	1	0	0	0	0.0274562
[truncated: 25,883 more rows]

## Sheet: Mouse_4_415_Signal
FrameCounter	Timestamp	LedState	Stimulation	Output0	Output1	Input0	Input1	Region0G
[truncated: 27,158 more rows]

[truncated: 11 more sheets: Mouse_4_470_Signal, Mouse_5_415_Signal, Mouse_5_470_Signal, Mouse_6_415_Signal, Mouse_6_470_Signal, Mouse_7_415_Signal, Mouse_7_470_Signal, Mouse_8_415_Signal, Mouse_8_470_Signal, Mouse_9_415_Signal, Mouse_9_470_Signal]
