# Supplementary material for: Glutamatergic supramammillary nucleus neurons respond to threatening stressors and promote active coping
Source: eLife. 2024 Jun 3;12:RP90972. doi: 10.7554/eLife.90972 (PMC11147510; doi:10.7554/eLife.90972)
Supplement: Figure 7—source data 2. [file elife-90972-fig7-data2.xlsx]

## Sheet: 7H-VGlut2-Cre FST Opto
	7H	VGlut2-Cre FST Opto
			ChR2										eYFP
			Mouse 1	Mouse 2	Mouse 3	Mouse 4	Mouse 5	Mouse 6	Mouse 7	Mouse 8	Mouse 9		Mouse 1	Mouse 2	Mouse 3	Mouse 4	Mouse 5	Mouse 6	Mouse 7	Mouse 8	Mouse 9	Mouse 10	Mouse 11
		Pre-stim	2	83	46	51	55	58	114	80	67		14	62	49	58	47	105	98	105	102	98	57
		Stim	0	0	0	0	3	2	2	61	17		42	73	41	16	78	103	41	103	66	101	72
		Post-stim	19	19	40	39	47	17	45	83	78		38	83	19	69	74	103	69	83	105	101	65

## Sheet: 7I-VGAT-Cre FST Opto
	7I	VGAT-Cre FST Opto
			ChR2												eYFP
			Mouse 1	Mouse 2	Mouse 3	Mouse 4	Mouse 5	Mouse 6	Mouse 7	Mouse 8	Mouse 9	Mouse 10	Mouse 11		Mouse 1	Mouse 2	Mouse 3	Mouse 4	Mouse 5	Mouse 6	Mouse 7	Mouse 8	Mouse 9	Mouse 10	Mouse 11
		Pre-stim	55	66	59	57	70	68	102	83	82	91	84		88	102	80	56	10	43	52	30	70	51	38
		Stim	72	16	52	67	20	48	105	0	72	80	4		78	82	91	65	25	68	79	38	67	41	4
		Post-stim	0	12	0	91	10	21	13	0	0	25	6		74	70	88	62	16	79	67	46	79	71	22
