# Supplementary material for: Glutamatergic supramammillary nucleus neurons respond to threatening stressors and promote active coping
Source: eLife. 2024 Jun 3;12:RP90972. doi: 10.7554/eLife.90972 (PMC11147510; doi:10.7554/eLife.90972)
Supplement: Figure 8—source data 1. [file elife-90972-fig8-data1.xlsx]

## Sheet: 8C-Time Interacting with Food
	8C	Time (s) Interacting with Food
			Food Deprived										Fed
			Mouse 1	Mouse 2	Mouse 3	Mouse 4	Mouse 5	Mouse 6	Mouse 7	Mouse 8	Mouse 9		Mouse 1	Mouse 2	Mouse 3	Mouse 4	Mouse 5	Mouse 6	Mouse 7	Mouse 8
		Time (s) Interacting with Food	302.32	372.92	386.61	290.94	375.56	251.97	224.31	256.06	248.7		43.12	81.34	84.22	78.33	35.25	68.54	73.69	115.04

## Sheet: 8D-Food Eaten (g)
	8D	Food eaten (grams)
			Food Deprived										Fed
			Mouse 1	Mouse 2	Mouse 3	Mouse 4	Mouse 5	Mouse 6	Mouse 7	Mouse 8	Mouse 9		Mouse 1	Mouse 2	Mouse 3	Mouse 4	Mouse 5	Mouse 6	Mouse 7	Mouse 8
		Food eaten (grams)	0.37	0.36	0.29	0.36	0.16	0.29	0.19	0.32	0.19		0	0.06	0.03	0.12	0	0.06	0.04	0.13

## Sheet: 8H-Opto Time Interacting Food
	8H	Time Interacting with Food Opto
			Cre+																	Fed
			Mouse 1	Mouse 2	Mouse 3	Mouse 4	Mouse 5	Mouse 6	Mouse 7	Mouse 8	Mouse 9	Mouse 10	Mouse 11	Mouse 12	Mouse 13	Mouse 14	Mouse 15	Mouse 16		Mouse 1	Mouse 2	Mouse 3	Mouse 4	Mouse 5	Mouse 6	Mouse 7	Mouse 8	Mouse 9	Mouse 10	Mouse 11	Mouse 12	Mouse 13	Mouse 14	Mouse 15	Mouse 16	Mouse 17
		Pre stim	117	87	123	125	84	101	0	0	74	78	10	2	3	9	0	15		69	111	154	210	48	127	49	39	16	87	63	159	59	5	45	48	16
		Stim	15	24	0	0	0	22	0	0	5	5	7	10	11	7	8	9		65	75	159	351	100	166	102	46	12	60	47	68	246	15	57	108	189
		Post stim	2	0	0	0	0	1	0	0	0	3	0	0	0	0	7	5		37	56	44	5	30	13	35	10	0	11	5	45	46	17	31	63	4

## Sheet: 8I-Opto Food Eaten
	8I	Food Eaten (grams) Opto
			Cre+																	Fed
			Mouse 1	Mouse 2	Mouse 3	Mouse 4	Mouse 5	Mouse 6	Mouse 7	Mouse 8	Mouse 9	Mouse 10	Mouse 11	Mouse 12	Mouse 13	Mouse 14	Mouse 15	Mouse 16		Mouse 1	Mouse 2	Mouse 3	Mouse 4	Mouse 5	Mouse 6	Mouse 7	Mouse 8	Mouse 9	Mouse 10	Mouse 11	Mouse 12	Mouse 13	Mouse 14	Mouse 15	Mouse 16	Mouse 17
		Food Eaten (grams)	0.47	0.18	0.23	0.15	0.18	0.22	0	0	0.1	0.1	0.16	0.17	0.16	0.13	0.21	0.18		0.3	0.4	0.39	0.53	0.24	0.37	0.38	0.53	0.1	0.1	0.2	0.23	0.26	0.26	0.27	0.31	0.43
