# Supplementary material for: Glutamatergic supramammillary nucleus neurons respond to threatening stressors and promote active coping
Source: eLife. 2024 Jun 3;12:RP90972. doi: 10.7554/eLife.90972 (PMC11147510; doi:10.7554/eLife.90972)
Supplement: Figure 8—source data 2. [file elife-90972-fig8-data2.xlsx]

## Sheet: Figure 8E
	Figure 8E. For each mouse, there are three worksheets (GCaMPs 470, Isosbestic 415, and timestamp for event)

## Sheet: Mouse 1_415 Signal
FrameCounter	Timestamp	LedState	Stimulation	Output0	Output1	Input0	Input1	Region0G
7118	2946.94	1	0	1	0	0	0	0.0162301
7120	2946.97	1	0	1	0	0	0	0.0162646
7122	2947	1	0	1	0	0	0	0.0162673
7124	2947.04	1	0	1	0	0	0	0.0163766
7126	2947.07	1	0	1	0	0	0	0.0162599
7128	2947.1	1	0	1	0	0	0	0.0161763
7130	2947.14	1	0	1	0	0	0	0.0163083
7132	2947.17	1	0	1	0	0	0	0.0163475
7134	2947.2	1	0	1	0	0	0	0.0164321
7136	2947.24	1	0	1	0	0	0	0.0163008
7138	2947.27	1	0	1	0	0	0	0.0162805
7140	2947.3	1	0	1	0	0	0	0.0162761
7142	2947.34	1	0	1	0	0	0	0.0162122
7144	2947.37	1	0	1	0	0	0	0.0162606
7146	2947.4	1	0	1	0	0	0	0.0162392
7148	2947.44	1	0	1	0	0	0	0.0162836
7150	2947.47	1	0	1	0	0	0	0.0162599
7152	2947.5	1	0	1	0	0	0	0.0163736
7154	2947.54	1	0	1	0	0	0	0.0161902
7156	2947.57	1	0	1	0	0	0	0.0160707
7158	2947.6	1	0	1	0	0	0	0.0161286
7160	2947.64	1	0	1	0	0	0	0.0161729
7162	2947.67	1	0	1	0	0	0	0.0162294
7164	2947.7	1	0	1	0	0	0	0.0162903
7166	2947.74	1	0	1	0	0	0	0.0163235
7168	2947.77	1	0	1	0	0	0	0.016288
7170	2947.8	1	0	1	0	0	0	0.0163797
7172	2947.84	1	0	1	0	0	0	0.0163553
7174	2947.87	1	0	1	0	0	0	0.0163482
7176	2947.9	1	0	1	0	0	0	0.0163069
7178	2947.94	1	0	1	0	0	0	0.0162717
7180	2947.97	1	0	1	0	0	0	0.0162216
7182	2948	1	0	1	0	0	0	0.0161357
7184	2948.04	1	0	1	0	0	0	0.0160088
7186	2948.07	1	0	1	0	0	0	0.0161871
7188	2948.1	1	0	1	0	0	0	0.0161218
7190	2948.14	1	0	1	0	0	0	0.0161174
7192	2948.17	1	0	1	0	0	0	0.0161181
7194	2948.2	1	0	1	0	0	0	0.0161577
7196	2948.24	1	0	1	0	0	0	0.0161012
7198	2948.27	1	0	1	0	0	0	0.0161875
7200	2948.3	1	0	1	0	0	0	0.0162179
7202	2948.34	1	0	1	0	0	0	0.0162041
7204	2948.37	1	0	1	0	0	0	0.0161611
7206	2948.4	1	0	1	0	0	0	0.0161208
7208	2948.44	1	0	1	0	0	0	0.0161661
7210	2948.47	1	0	1	0	0	0	0.0162223
7212	2948.5	1	0	1	0	0	0	0.016114
7214	2948.54	1	0	1	0	0	0	0.0160778
7216	2948.57	1	0	1	0	0	0	0.0160677
7218	2948.6	1	0	1	0	0	0	0.0161211
7220	2948.64	1	0	1	0	0	0	0.0160602
7222	2948.67	1	0	1	0	0	0	0.0161509
7224	2948.7	1	0	1	0	0	0	0.0161062
7226	2948.74	1	0	1	0	0	0	0.0160964
7228	2948.77	1	0	1	0	0	0	0.0161702
7230	2948.8	1	0	1	0	0	0	0.0161824
7232	2948.84	1	0	1	0	0	0	0.0162396
7234	2948.87	1	0	1	0	0	0	0.0161313
7236	2948.9	1	0	1	0	0	0	0.0161546
7238	2948.94	1	0	1	0	0	0	0.0162501
7240	2948.97	1	0	1	0	0	0	0.0161597
7242	2949	1	0	1	0	0	0	0.0162552
7244	2949.04	1	0	1	0	0	0	0.0161523
7246	2949.07	1	0	1	0	0	0	0.0161973
7248	2949.1	1	0	1	0	0	0	0.0161695
7250	2949.14	1	0	1	0	0	0	0.0161096
7252	2949.17	1	0	1	0	0	0	0.0161963
7254	2949.2	1	0	1	0	0	0	0.0160727
7256	2949.24	1	0	1	0	0	0	0.0161435
7258	2949.27	1	0	1	0	0	0	0.0160738
7260	2949.3	1	0	1	0	0	0	0.0161793
7262	2949.34	1	0	1	0	0	0	0.0160951
7264	2949.37	1	0	1	0	0	0	0.0160474
7266	2949.4	1	0	1	0	0	0	0.0161563
7268	2949.44	1	0	1	0	0	0	0.0160623
7270	2949.47	1	0	1	0	0	0	0.0162057
7272	2949.5	1	0	1	0	0	0	0.0160914
7274	2949.54	1	0	1	0	0	0	0.0161184
7276	2949.57	1	0	1	0	0	0	0.0161492
7278	2949.6	1	0	1	0	0	0	0.0160859
7280	2949.64	1	0	1	0	0	0	0.0161814
7282	2949.67	1	0	1	0	0	0	0.0161093
7284	2949.7	1	0	1	0	0	0	0.0160731
7286	2949.74	1	0	1	0	0	0	0.0161621
7288	2949.77	1	0	1	0	0	0	0.0161492
7290	2949.8	1	0	1	0	0	0	0.0162714
7292	2949.84	1	0	1	0	0	0	0.016109
7294	2949.87	1	0	1	0	0	0	0.0162325
7296	2949.9	1	0	1	0	0	0	0.0161015
7298	2949.94	1	0	1	0	0	0	0.016088
7300	2949.97	1	0	1	0	0	0	0.016203
7302	2950	1	0	1	0	0	0	0.0161249
7304	2950.04	1	0	1	0	0	0	0.0162247
7306	2950.07	1	0	1	0	0	0	0.0161502
7308	2950.1	1	0	1	0	0	0	0.0161574
7310	2950.14	1	0	1	0	0	0	0.0161161
7312	2950.17	1	0	1	0	0	0	0.016089
7314	2950.2	1	0	1	0	0	0	0.0161093
7316	2950.24	1	0	1	0	0	0	0.0161272
7318	2950.27	1	0	1	0	0	0	0.0161827
7320	2950.3	1	0	1	0	0	0	0.0160995
7322	2950.34	1	0	1	0	0	0	0.0161651
7324	2950.37	1	0	1	0	0	0	0.016158
7326	2950.4	1	0	1	0	0	0	0.0161584
7328	2950.44	1	0	1	0	0	0	0.0161181
7330	2950.47	1	0	1	0	0	0	0.0160436
7332	2950.5	1	0	1	0	0	0	0.0160453
7334	2950.54	1	0	1	0	0	0	0.015909
7336	2950.57	1	0	1	0	0	0	0.0160186
7338	2950.6	1	0	1	0	0	0	0.0159875
7340	2950.64	1	0	1	0	0	0	0.0161536
7342	2950.67	1	0	1	0	0	0	0.0160856
7344	2950.7	1	0	1	0	0	0	0.0161428
7346	2950.74	1	0	1	0	0	0	0.0161736
7348	2950.77	1	0	1	0	0	0	0.0161499
7350	2950.8	1	0	1	0	0	0	0.0159925
7352	2950.84	1	0	1	0	0	0	0.0162115
7354	2950.87	1	0	1	0	0	0	0.0162027
7356	2950.9	1	0	1	0	0	0	0.0161482
7358	2950.94	1	0	1	0	0	0	0.0160768
7360	2950.97	1	0	1	0	0	0	0.0160792
7362	2951	1	0	1	0	0	0	0.0161008
7364	2951.04	1	0	1	0	0	0	0.0159851
7366	2951.07	1	0	1	0	0	0	0.016115
7368	2951.1	1	0	1	0	0	0	0.0161638
7370	2951.14	1	0	1	0	0	0	0.0161827
7372	2951.17	1	0	1	0	0	0	0.016066
7374	2951.2	1	0	1	0	0	0	0.016048
7376	2951.24	1	0	1	0	0	0	0.0161513
7378	2951.27	1	0	1	0	0	0	0.0161347
7380	2951.3	1	0	1	0	0	0	0.0161367
7382	2951.34	1	0	1	0	0	0	0.0160792
7384	2951.37	1	0	1	0	0	0	0.0161922
7386	2951.4	1	0	1	0	0	0	0.016198
7388	2951.44	1	0	1	0	0	0	0.016136
7390	2951.47	1	0	1	0	0	0	0.0161915
7392	2951.5	1	0	1	0	0	0	0.0161516
7394	2951.54	1	0	1	0	0	0	0.0161719
7396	2951.57	1	0	1	0	0	0	0.016153
7398	2951.6	1	0	1	0	0	0	0.0161262
7400	2951.64	1	0	1	0	0	0	0.0160463
7402	2951.67	1	0	1	0	0	0	0.0160227
7404	2951.7	1	0	1	0	0	0	0.0160572
7406	2951.74	1	0	1	0	0	0	0.0160071
7408	2951.77	1	0	1	0	0	0	0.0160064
7410	2951.8	1	0	1	0	0	0	0.015999
7412	2951.84	1	0	1	0	0	0	0.0159844
7414	2951.87	1	0	1	0	0	0	0.0160853
7416	2951.9	1	0	1	0	0	0	0.0160193
7418	2951.94	1	0	1	0	0	0	0.0161194
7420	2951.97	1	0	1	0	0	0	0.0159959
7422	2952	1	0	1	0	0	0	0.0160186
7424	2952.04	1	0	1	0	0	0	0.0158991
7426	2952.07	1	0	1	0	0	0	0.015758
7428	2952.1	1	0	1	0	0	0	0.0158159
7430	2952.14	1	0	1	0	0	0	0.0158568
7432	2952.17	1	0	1	0	0	0	0.0159431
7434	2952.2	1	0	1	0	0	0	0.0160267
7436	2952.24	1	0	1	0	0	0	0.0160524
7438	2952.27	1	0	1	0	0	0	0.0160558
7440	2952.3	1	0	1	0	0	0	0.0159347
7442	2952.34	1	0	1	0	0	0	0.015979
7444	2952.37	1	0	1	0	0	0	0.0159397
7446	2952.4	1	0	1	0	0	0	0.0159299
7448	2952.44	1	0	1	0	0	0	0.0158247
7450	2952.47	1	0	1	0	0	0	0.0158738
7452	2952.5	1	0	1	0	0	0	0.0160376
7454	2952.54	1	0	1	0	0	0	0.0161878
7456	2952.57	1	0	1	0	0	0	0.0164832
7458	2952.6	1	0	1	0	0	0	0.0164944
7460	2952.64	1	0	1	0	0	0	0.0165205
7462	2952.67	1	0	1	0	0	0	0.0164907
7464	2952.7	1	0	1	0	0	0	0.0164068
7466	2952.74	1	0	1	0	0	0	0.0162951
7468	2952.77	1	0	1	0	0	0	0.0161689
7470	2952.8	1	0	1	0	0	0	0.0162355
7472	2952.84	1	0	1	0	0	0	0.0161509
7474	2952.87	1	0	1	0	0	0	0.0162034
7476	2952.9	1	0	1	0	0	0	0.0161577
7478	2952.94	1	0	1	0	0	0	0.0160971
7480	2952.97	1	0	1	0	0	0	0.0159079
7482	2953	1	0	1	0	0	0	0.016022
7484	2953.04	1	0	1	0	0	0	0.0159777
7486	2953.07	1	0	1	0	0	0	0.0158135
7488	2953.1	1	0	1	0	0	0	0.0158101
7490	2953.14	1	0	1	0	0	0	0.0158142
7492	2953.17	1	0	1	0	0	0	0.0158024
7494	2953.2	1	0	1	0	0	0	0.0156812
7496	2953.24	1	0	1	0	0	0	0.0158643
7498	2953.27	1	0	1	0	0	0	0.0159002
7500	2953.3	1	0	1	0	0	0	0.0159015
7502	2953.34	1	0	1	0	0	0	0.0159096
7504	2953.37	1	0	1	0	0	0	0.0158751
7506	2953.4	1	0	1	0	0	0	0.0158981
7508	2953.44	1	0	1	0	0	0	0.0159296
7510	2953.47	1	0	1	0	0	0	0.0159025
7512	2953.5	1	0	1	0	0	0	0.0158859
7514	2953.54	1	0	1	0	0	0	0.0159073
7516	2953.57	1	0	1	0	0	0	0.0159178
7518	2953.6	1	0	1	0	0	0	0.0158599
7520	2953.64	1	0	1	0	0	0	0.0158873
7522	2953.67	1	0	1	0	0	0	0.015937
7524	2953.7	1	0	1	0	0	0	0.0159303
7526	2953.74	1	0	1	0	0	0	0.0159722
7528	2953.77	1	0	1	0	0	0	0.0159942
7530	2953.8	1	0	1	0	0	0	0.0159306
7532	2953.84	1	0	1	0	0	0	0.0159682
7534	2953.87	1	0	1	0	0	0	0.0158863
7536	2953.9	1	0	1	0	0	0	0.0158866
7538	2953.94	1	0	1	0	0	0	0.0158853
7540	2953.97	1	0	1	0	0	0	0.0159018
7542	2954	1	0	1	0	0	0	0.0158812
7544	2954.04	1	0	1	0	0	0	0.0159228
7546	2954.07	1	0	1	0	0	0	0.0159225
7548	2954.1	1	0	1	0	0	0	0.0160061
7550	2954.14	1	0	1	0	0	0	0.0159316
7552	2954.17	1	0	1	0	0	0	0.0159208
7554	2954.2	1	0	1	0	0	0	0.0159232
7556	2954.24	1	0	1	0	0	0	0.0159306
7558	2954.27	1	0	1	0	0	0	0.0159611
7560	2954.3	1	0	1	0	0	0	0.0159936
7562	2954.34	1	0	1	0	0	0	0.0159286
7564	2954.37	1	0	1	0	0	0	0.0158981
7566	2954.4	1	0	1	0	0	0	0.0159228
7568	2954.44	1	0	1	0	0	0	0.015892
7570	2954.47	1	0	1	0	0	0	0.0159513
7572	2954.5	1	0	1	0	0	0	0.0158511
7574	2954.54	1	0	1	0	0	0	0.0158964
7576	2954.57	1	0	1	0	0	0	0.0158264
7578	2954.6	1	0	1	0	0	0	0.015847
7580	2954.64	1	0	1	0	0	0	0.0157932
7582	2954.67	1	0	1	0	0	0	0.0157766
7584	2954.7	1	0	1	0	0	0	0.0157793
7586	2954.74	1	0	1	0	0	0	0.0157211
7588	2954.77	1	0	1	0	0	0	0.0158937
7590	2954.8	1	0	1	0	0	0	0.0158318
7592	2954.84	1	0	1	0	0	0	0.0158247
7594	2954.87	1	0	1	0	0	0	0.0158447
7596	2954.9	1	0	1	0	0	0	0.0159035
7598	2954.94	1	0	1	0	0	0	0.0159191
7600	2954.97	1	0	1	0	0	0	0.0158095
7602	2955	1	0	1	0	0	0	0.0157384
7604	2955.04	1	0	1	0	0	0	0.0158318
7606	2955.07	1	0	1	0	0	0	0.0157685
7608	2955.1	1	0	1	0	0	0	0.0157976
7610	2955.14	1	0	1	0	0	0	0.0157394
7612	2955.17	1	0	1	0	0	0	0.0157506
7614	2955.2	1	0	1	0	0	0	0.015712
7616	2955.24	1	0	1	0	0	0	0.0157387
7618	2955.27	1	0	1	0	0	0	0.0158169
7620	2955.3	1	0	1	0	0	0	0.0158724
7622	2955.34	1	0	1	0	0	0	0.0158842
7624	2955.37	1	0	1	0	0	0	0.0159753
7626	2955.4	1	0	1	0	0	0	0.0160954
7628	2955.44	1	0	1	0	0	0	0.0161695
7630	2955.47	1	0	1	0	0	0	0.0161648
7632	2955.5	1	0	1	0	0	0	0.0161431
7634	2955.54	1	0	1	0	0	0	0.0161949
7636	2955.57	1	0	1	0	0	0	0.0163113
7638	2955.6	1	0	1	0	0	0	0.0162633
7640	2955.64	1	0	1	0	0	0	0.0161056
7642	2955.67	1	0	1	0	0	0	0.0159513
7644	2955.7	1	0	1	0	0	0	0.0159814
7646	2955.74	1	0	1	0	0	0	0.0158656
7648	2955.77	1	0	1	0	0	0	0.0156951
7650	2955.8	1	0	1	0	0	0	0.0157472
7652	2955.84	1	0	1	0	0	0	0.0157675
7654	2955.87	1	0	1	0	0	0	0.0158413
7656	2955.9	1	0	1	0	0	0	0.0158233
7658	2955.94	1	0	1	0	0	0	0.0158216
7660	2955.97	1	0	1	0	0	0	0.0157732
7662	2956	1	0	1	0	0	0	0.0157875
7664	2956.04	1	0	1	0	0	0	0.0157959
7666	2956.07	1	0	1	0	0	0	0.0157915
7668	2956.1	1	0	1	0	0	0	0.015821
7670	2956.14	1	0	1	0	0	0	0.0157736
7672	2956.17	1	0	1	0	0	0	0.0157144
7674	2956.2	1	0	1	0	0	0	0.0157353
7676	2956.24	1	0	1	0	0	0	0.0157513
7678	2956.27	1	0	1	0	0	0	0.0157374
7680	2956.3	1	0	1	0	0	0	0.0157289
7682	2956.34	1	0	1	0	0	0	0.0157445
7684	2956.37	1	0	1	0	0	0	0.0157018
7686	2956.4	1	0	1	0	0	0	0.0156876
7688	2956.44	1	0	1	0	0	0	0.0157073
7690	2956.47	1	0	1	0	0	0	0.0157567
7692	2956.5	1	0	1	0	0	0	0.0157509
7694	2956.54	1	0	1	0	0	0	0.0158744
7696	2956.57	1	0	1	0	0	0	0.0158518
7698	2956.6	1	0	1	0	0	0	0.0157966
7700	2956.64	1	0	1	0	0	0	0.0157472
7702	2956.67	1	0	1	0	0	0	0.0156589
7704	2956.7	1	0	1	0	0	0	0.0158413
7706	2956.74	1	0	1	0	0	0	0.0158047
7708	2956.77	1	0	1	0	0	0	0.0158325
7710	2956.8	1	0	1	0	0	0	0.0159002
7712	2956.84	1	0	1	0	0	0	0.0160934
7714	2956.87	1	0	1	0	0	0	0.0161215
7716	2956.9	1	0	1	0	0	0	0.016288
7718	2956.94	1	0	1	0	0	0	0.0163151
7720	2956.97	1	0	1	0	0	0	0.0163936
7722	2957	1	0	1	0	0	0	0.0163804
7724	2957.04	1	0	1	0	0	0	0.0163178
7726	2957.07	1	0	1	0	0	0	0.0161766
7728	2957.1	1	0	1	0	0	0	0.0161614
7730	2957.14	1	0	1	0	0	0	0.0161733
7732	2957.17	1	0	1	0	0	0	0.0160541
7734	2957.2	1	0	1	0	0	0	0.0157259
7736	2957.24	1	0	1	0	0	0	0.01569
7738	2957.27	1	0	1	0	0	0	0.0155841
7740	2957.3	1	0	1	0	0	0	0.0153668
7742	2957.34	1	0	1	0	0	0	0.0154074
7744	2957.37	1	0	1	0	0	0	0.0156264
7746	2957.4	1	0	1	0	0	0	0.0155431
7748	2957.44	1	0	1	0	0	0	0.0153695
7750	2957.47	1	0	1	0	0	0	0.0154944
7752	2957.5	1	0	1	0	0	0	0.0154267
7754	2957.54	1	0	1	0	0	0	0.015312
7756	2957.57	1	0	1	0	0	0	0.0153817
7758	2957.6	1	0	1	0	0	0	0.0156463
7760	2957.64	1	0	1	0	0	0	0.0157709
7762	2957.67	1	0	1	0	0	0	0.0158968
7764	2957.7	1	0	1	0	0	0	0.0158294
7766	2957.74	1	0	1	0	0	0	0.0158399
7768	2957.77	1	0	1	0	0	0	0.0158504
7770	2957.8	1	0	1	0	0	0	0.0159015
7772	2957.84	1	0	1	0	0	0	0.0158866
7774	2957.87	1	0	1	0	0	0	0.0158321
7776	2957.9	1	0	1	0	0	0	0.0157983
7778	2957.94	1	0	1	0	0	0	0.0158172
7780	2957.97	1	0	1	0	0	0	0.0159326
7782	2958	1	0	1	0	0	0	0.0160572
7784	2958.04	1	0	1	0	0	0	0.016069
7786	2958.07	1	0	1	0	0	0	0.0161682
7788	2958.1	1	0	1	0	0	0	0.0163421
7790	2958.14	1	0	1	0	0	0	0.0163773
7792	2958.17	1	0	1	0	0	0	0.0163946
7794	2958.2	1	0	1	0	0	0	0.016312
7796	2958.24	1	0	1	0	0	0	0.0162771
7798	2958.27	1	0	1	0	0	0	0.0163151
7800	2958.3	1	0	1	0	0	0	0.016178
7802	2958.34	1	0	1	0	0	0	0.0161597
7804	2958.37	1	0	1	0	0	0	0.0162247
7806	2958.4	1	0	1	0	0	0	0.0161252
7808	2958.44	1	0	1	0	0	0	0.0162186
7810	2958.47	1	0	1	0	0	0	0.0161607
7812	2958.5	1	0	1	0	0	0	0.016178
7814	2958.54	1	0	1	0	0	0	0.0161201
7816	2958.57	1	0	1	0	0	0	0.0161367
7818	2958.6	1	0	1	0	0	0	0.0161452
7820	2958.64	1	0	1	0	0	0	0.0160653
7822	2958.67	1	0	1	0	0	0	0.0160951
7824	2958.7	1	0	1	0	0	0	0.0161726
7826	2958.74	1	0	1	0	0	0	0.016134
7828	2958.77	1	0	1	0	0	0	0.0160311
7830	2958.8	1	0	1	0	0	0	0.0159499
7832	2958.84	1	0	1	0	0	0	0.0161993
7834	2958.87	1	0	1	0	0	0	0.0159848
7836	2958.9	1	0	1	0	0	0	0.0159709
7838	2958.94	1	0	1	0	0	0	0.0157401
7840	2958.97	1	0	1	0	0	0	0.0156616
7842	2959	1	0	1	0	0	0	0.0157167
7844	2959.04	1	0	1	0	0	0	0.0158193
7846	2959.07	1	0	1	0	0	0	0.0159719
7848	2959.1	1	0	1	0	0	0	0.0157949
7850	2959.14	1	0	1	0	0	0	0.0155895
7852	2959.17	1	0	1	0	0	0	0.0157293
7854	2959.2	1	0	1	0	0	0	0.0155462
7856	2959.24	1	0	1	0	0	0	0.015554
7858	2959.27	1	0	1	0	0	0	0.0157171
7860	2959.3	1	0	1	0	0	0	0.0157083
7862	2959.34	1	0	1	0	0	0	0.0157137
7864	2959.37	1	0	1	0	0	0	0.0157259
7866	2959.4	1	0	1	0	0	0	0.0158196
7868	2959.44	1	0	1	0	0	0	0.015825
7870	2959.47	1	0	1	0	0	0	0.0157665
7872	2959.5	1	0	1	0	0	0	0.0157485
7874	2959.54	1	0	1	0	0	0	0.0157177
7876	2959.57	1	0	1	0	0	0	0.0157069
7878	2959.6	1	0	1	0	0	0	0.0157144
7880	2959.64	1	0	1	0	0	0	0.0157668
7882	2959.67	1	0	1	0	0	0	0.0157712
7884	2959.7	1	0	1	0	0	0	0.0158007
7886	2959.74	1	0	1	0	0	0	0.0157543
7888	2959.77	1	0	1	0	0	0	0.0157908
7890	2959.8	1	0	1	0	0	0	0.0157722
7892	2959.84	1	0	1	0	0	0	0.0157577
7894	2959.87	1	0	1	0	0	0	0.0157858
7896	2959.9	1	0	1	0	0	0	0.0157174
7898	2959.94	1	0	1	0	0	0	0.0157479
7900	2959.97	1	0	1	0	0	0	0.0156839
7902	2960	1	0	1	0	0	0	0.0157946
7904	2960.04	1	0	1	0	0	0	0.0157276
7906	2960.07	1	0	1	0	0	0	0.0157306
7908	2960.1	1	0	1	0	0	0	0.0157255
7910	2960.14	1	0	1	0	0	0	0.0157936
7912	2960.17	1	0	1	0	0	0	0.0156788
7914	2960.2	1	0	1	0	0	0	0.0157012
7916	2960.24	1	0	1	0	0	0	0.0158166
7918	2960.27	1	0	1	0	0	0	0.0157083
7920	2960.3	1	0	1	0	0	0	0.015759
7922	2960.34	1	0	1	0	0	0	0.0157523
7924	2960.37	1	0	1	0	0	0	0.0158623
7926	2960.4	1	0	1	0	0	0	0.0159932
7928	2960.44	1	0	1	0	0	0	0.015888
7930	2960.47	1	0	1	0	0	0	0.0158626
7932	2960.5	1	0	1	0	0	0	0.0159834
7934	2960.54	1	0	1	0	0	0	0.0159736
7936	2960.57	1	0	1	0	0	0	0.0159205
7938	2960.6	1	0	1	0	0	0	0.0158115
7940	2960.64	1	0	1	0	0	0	0.0158504
7942	2960.67	1	0	1	0	0	0	0.0157198
7944	2960.7	1	0	1	0	0	0	0.0154754
7946	2960.74	1	0	1	0	0	0	0.0155397
7948	2960.77	1	0	1	0	0	0	0.0154446
7950	2960.8	1	0	1	0	0	0	0.0153408
7952	2960.84	1	0	1	0	0	0	0.015222
7954	2960.87	1	0	1	0	0	0	0.0152873
7956	2960.9	1	0	1	0	0	0	0.0152348
7958	2960.94	1	0	1	0	0	0	0.0152731
7960	2960.97	1	0	1	0	0	0	0.0152961
7962	2961	1	0	1	0	0	0	0.0152995
7964	2961.04	1	0	1	0	0	0	0.015294
7966	2961.07	1	0	1	0	0	0	0.0152697
7968	2961.1	1	0	1	0	0	0	0.015244
7970	2961.14	1	0	1	0	0	0	0.0152402
7972	2961.17	1	0	1	0	0	0	0.0152287
7974	2961.2	1	0	1	0	0	0	0.0152
7976	2961.24	1	0	1	0	0	0	0.0151482
7978	2961.27	1	0	1	0	0	0	0.0152467
7980	2961.3	1	0	1	0	0	0	0.0151133
7982	2961.34	1	0	1	0	0	0	0.0150859
7984	2961.37	1	0	1	0	0	0	0.0151367
7986	2961.4	1	0	1	0	0	0	0.0152653
7988	2961.44	1	0	1	0	0	0	0.0153756
7990	2961.47	1	0	1	0	0	0	0.0153881
7992	2961.5	1	0	1	0	0	0	0.0155441
7994	2961.54	1	0	1	0	0	0	0.0156186
7996	2961.57	1	0	1	0	0	0	0.0155763
7998	2961.6	1	0	1	0	0	0	0.0156132
8000	2961.64	1	0	1	0	0	0	0.0155776
8002	2961.67	1	0	1	0	0	0	0.0157665
8004	2961.7	1	0	1	0	0	0	0.0159323
8006	2961.74	1	0	1	0	0	0	0.0160511
8008	2961.77	1	0	1	0	0	0	0.0159861
8010	2961.8	1	0	1	0	0	0	0.0159469
8012	2961.84	1	0	1	0	0	0	0.0159733
8014	2961.87	1	0	1	0	0	0	0.0159079
8016	2961.9	1	0	1	0	0	0	0.0156859
8018	2961.94	1	0	1	0	0	0	0.0154132
8020	2961.97	1	0	1	0	0	0	0.0153827
8022	2962	1	0	1	0	0	0	0.0156585
8024	2962.04	1	0	1	0	0	0	0.0158771
8026	2962.07	1	0	1	0	0	0	0.0159563
8028	2962.1	1	0	1	0	0	0	0.0159205
8030	2962.14	1	0	1	0	0	0	0.0159469
8032	2962.17	1	0	1	0	0	0	0.0159861
8034	2962.2	1	0	1	0	0	0	0.016021
8036	2962.24	1	0	1	0	0	0	0.0160365
8038	2962.27	1	0	1	0	0	0	0.016088
8040	2962.3	1	0	1	0	0	0	0.0160545
8042	2962.34	1	0	1	0	0	0	0.0159452
8044	2962.37	1	0	1	0	0	0	0.0158609
8046	2962.4	1	0	1	0	0	0	0.0157235
8048	2962.44	1	0	1	0	0	0	0.0155049
8050	2962.47	1	0	1	0	0	0	0.0155326
8052	2962.5	1	0	1	0	0	0	0.0157103
8054	2962.54	1	0	1	0	0	0	0.0158372
8056	2962.57	1	0	1	0	0	0	0.0159814
8058	2962.6	1	0	1	0	0	0	0.016069
8060	2962.64	1	0	1	0	0	0	0.0160558
8062	2962.67	1	0	1	0	0	0	0.0159831
8064	2962.7	1	0	1	0	0	0	0.0156172
8066	2962.74	1	0	1	0	0	0	0.0156565
8068	2962.77	1	0	1	0	0	0	0.0155272
8070	2962.8	1	0	1	0	0	0	0.0153939
8072	2962.84	1	0	1	0	0	0	0.0154819
8074	2962.87	1	0	1	0	0	0	0.0155001
8076	2962.9	1	0	1	0	0	0	0.0156673
8078	2962.94	1	0	1	0	0	0	0.015737
8080	2962.97	1	0	1	0	0	0	0.0157279
8082	2963	1	0	1	0	0	0	0.0158389
8084	2963.04	1	0	1	0	0	0	0.0158112
8086	2963.07	1	0	1	0	0	0	0.0158954
8088	2963.1	1	0	1	0	0	0	0.0157939
8090	2963.14	1	0	1	0	0	0	0.0158176
8092	2963.17	1	0	1	0	0	0	0.0157665
8094	2963.2	1	0	1	0	0	0	0.0156602
8096	2963.24	1	0	1	0	0	0	0.0158382
8098	2963.27	1	0	1	0	0	0	0.0156348
8100	2963.3	1	0	1	0	0	0	0.0156047
8102	2963.34	1	0	1	0	0	0	0.0156754
8104	2963.37	1	0	1	0	0	0	0.0156023
8106	2963.4	1	0	1	0	0	0	0.0155005
8108	2963.44	1	0	1	0	0	0	0.0155641
8110	2963.47	1	0	1	0	0	0	0.0157157
8112	2963.5	1	0	1	0	0	0	0.0156826
8114	2963.54	1	0	1	0	0	0	0.0156003
8116	2963.57	1	0	1	0	0	0	0.0156254
8118	2963.6	1	0	1	0	0	0	0.0156013
8120	2963.64	1	0	1	0	0	0	0.0155279
8122	2963.67	1	0	1	0	0	0	0.0155776
8124	2963.7	1	0	1	0	0	0	0.0158095
8126	2963.74	1	0	1	0	0	0	0.0159391
8128	2963.77	1	0	1	0	0	0	0.0157966
8130	2963.8	1	0	1	0	0	0	0.0157628
8132	2963.84	1	0	1	0	0	0	0.0154741
8134	2963.87	1	0	1	0	0	0	0.01527
8136	2963.9	1	0	1	0	0	0	0.0153035
8138	2963.94	1	0	1	0	0	0	0.0153154
8140	2963.97	1	0	1	0	0	0	0.0152917
8142	2964	1	0	1	0	0	0	0.0153465
8144	2964.04	1	0	1	0	0	0	0.0156064
8146	2964.07	1	0	1	0	0	0	0.0157296
8148	2964.1	1	0	1	0	0	0	0.0158521
8150	2964.14	1	0	1	0	0	0	0.0159123
8152	2964.17	1	0	1	0	0	0	0.0160413
8154	2964.2	1	0	1	0	0	0	0.0160572
8156	2964.24	1	0	1	0	0	0	0.0160755
8158	2964.27	1	0	1	0	0	0	0.016177
8160	2964.3	1	0	1	0	0	0	0.0159337
8162	2964.34	1	0	1	0	0	0	0.0157056
8164	2964.37	1	0	1	0	0	0	0.0155414
8166	2964.4	1	0	1	0	0	0	0.0155066
8168	2964.44	1	0	1	0	0	0	0.0154027
8170	2964.47	1	0	1	0	0	0	0.0153946
8172	2964.5	1	0	1	0	0	0	0.0156243
8174	2964.54	1	0	1	0	0	0	0.0156318
8176	2964.57	1	0	1	0	0	0	0.0156497
8178	2964.6	1	0	1	0	0	0	0.0156446
8180	2964.64	1	0	1	0	0	0	0.0156328
8182	2964.67	1	0	1	0	0	0	0.0156937
8184	2964.7	1	0	1	0	0	0	0.0156717
8186	2964.74	1	0	1	0	0	0	0.015736
8188	2964.77	1	0	1	0	0	0	0.0156602
8190	2964.8	1	0	1	0	0	0	0.0156264
8192	2964.84	1	0	1	0	0	0	0.0155648
8194	2964.87	1	0	1	0	0	0	0.0155949
8196	2964.9	1	0	1	0	0	0	0.0156166
8198	2964.94	1	0	1	0	0	0	0.0155956
8200	2964.97	1	0	1	0	0	0	0.0155594
8202	2965	1	0	1	0	0	0	0.0154382
8204	2965.04	1	0	1	0	0	0	0.0155465
8206	2965.07	1	0	1	0	0	0	0.0156595
8208	2965.1	1	0	1	0	0	0	0.015689
8210	2965.14	1	0	1	0	0	0	0.015603
8212	2965.17	1	0	1	0	0	0	0.0156392
8214	2965.2	1	0	1	0	0	0	0.015534
8216	2965.24	1	0	1	0	0	0	0.0156399
8218	2965.27	1	0	1	0	0	0	0.0157032
8220	2965.3	1	0	1	0	0	0	0.0156054
8222	2965.34	1	0	1	0	0	0	0.015513
8224	2965.37	1	0	1	0	0	0	0.0154957
8226	2965.4	1	0	1	0	0	0	0.0155248
8228	2965.44	1	0	1	0	0	0	0.015465
8230	2965.47	1	0	1	0	0	0	0.0154744
8232	2965.5	1	0	1	0	0	0	0.015468
8234	2965.54	1	0	1	0	0	0	0.0154721
8236	2965.57	1	0	1	0	0	0	0.0155242
8238	2965.6	1	0	1	0	0	0	0.0155171
8240	2965.64	1	0	1	0	0	0	0.0155387
8242	2965.67	1	0	1	0	0	0	0.0155607
8244	2965.7	1	0	1	0	0	0	0.0155814
8246	2965.74	1	0	1	0	0	0	0.0155641
8248	2965.77	1	0	1	0	0	0	0.0155485
8250	2965.8	1	0	1	0	0	0	0.0155262
8252	2965.84	1	0	1	0	0	0	0.0155259
8254	2965.87	1	0	1	0	0	0	0.0155614
8256	2965.9	1	0	1	0	0	0	0.0155682
8258	2965.94	1	0	1	0	0	0	0.0155651
8260	2965.97	1	0	1	0	0	0	0.0156199
8262	2966	1	0	1	0	0	0	0.0156111
8264	2966.04	1	0	1	0	0	0	0.0156139
8266	2966.07	1	0	1	0	0	0	0.0155952
8268	2966.1	1	0	1	0	0	0	0.015601
8270	2966.14	1	0	1	0	0	0	0.0156172
8272	2966.17	1	0	1	0	0	0	0.0155408
8274	2966.2	1	0	1	0	0	0	0.0156088
8276	2966.24	1	0	1	0	0	0	0.0156074
8278	2966.27	1	0	1	0	0	0	0.015621
8280	2966.3	1	0	1	0	0	0	0.0155858
8282	2966.34	1	0	1	0	0	0	0.0156196
8284	2966.37	1	0	1	0	0	0	0.0156227
8286	2966.4	1	0	1	0	0	0	0.0156281
8288	2966.44	1	0	1	0	0	0	0.0155672
8290	2966.47	1	0	1	0	0	0	0.0155529
8292	2966.5	1	0	1	0	0	0	0.0155617
8294	2966.54	1	0	1	0	0	0	0.0157462
8296	2966.57	1	0	1	0	0	0	0.0156101
8298	2966.6	1	0	1	0	0	0	0.0156257
8300	2966.64	1	0	1	0	0	0	0.0157858
8302	2966.67	1	0	1	0	0	0	0.0158315
8304	2966.7	1	0	1	0	0	0	0.0155959
8306	2966.74	1	0	1	0	0	0	0.0154284
8308	2966.77	1	0	1	0	0	0	0.0154453
8310	2966.8	1	0	1	0	0	0	0.0153489
8312	2966.84	1	0	1	0	0	0	0.0154717
8314	2966.87	1	0	1	0	0	0	0.0155133
8316	2966.9	1	0	1	0	0	0	0.0154629
8318	2966.94	1	0	1	0	0	0	0.0155255
8320	2966.97	1	0	1	0	0	0	0.0155847
8322	2967	1	0	1	0	0	0	0.0154836
8324	2967.04	1	0	1	0	0	0	0.0153005
8326	2967.07	1	0	1	0	0	0	0.0153116
8328	2967.1	1	0	1	0	0	0	0.0154582
8330	2967.14	1	0	1	0	0	0	0.0157242
8332	2967.17	1	0	1	0	0	0	0.0158758
8334	2967.2	1	0	1	0	0	0	0.0159722
8336	2967.24	1	0	1	0	0	0	0.0159485
8338	2967.27	1	0	1	0	0	0	0.0159716
8340	2967.3	1	0	1	0	0	0	0.0161482
8342	2967.34	1	0	1	0	0	0	0.0161895
8344	2967.37	1	0	1	0	0	0	0.0161837
8346	2967.4	1	0	1	0	0	0	0.0161837
8348	2967.44	1	0	1	0	0	0	0.0161198
8350	2967.47	1	0	1	0	0	0	0.0160988
8352	2967.5	1	0	1	0	0	0	0.0162078
8354	2967.54	1	0	1	0	0	0	0.0160162
8356	2967.57	1	0	1	0	0	0	0.0158883
8358	2967.6	1	0	1	0	0	0	0.0159817
8360	2967.64	1	0	1	0	0	0	0.0159076
8362	2967.67	1	0	1	0	0	0	0.015645
8364	2967.7	1	0	1	0	0	0	0.0157628
8366	2967.74	1	0	1	0	0	0	0.0157661
8368	2967.77	1	0	1	0	0	0	0.0156819
8370	2967.8	1	0	1	0	0	0	0.0155282
8372	2967.84	1	0	1	0	0	0	0.0156189
8374	2967.87	1	0	1	0	0	0	0.0155766
8376	2967.9	1	0	1	0	0	0	0.015582
8378	2967.94	1	0	1	0	0	0	0.0156379
8380	2967.97	1	0	1	0	0	0	0.0156859
8382	2968	1	0	1	0	0	0	0.0156863
8384	2968.04	1	0	1	0	0	0	0.015645
8386	2968.07	1	0	1	0	0	0	0.0156402
8388	2968.1	1	0	1	0	0	0	0.0156071
8390	2968.14	1	0	1	0	0	0	0.0155756
8392	2968.17	1	0	1	0	0	0	0.0156084
8394	2968.2	1	0	1	0	0	0	0.0156683
8396	2968.24	1	0	1	0	0	0	0.015713
8398	2968.27	1	0	1	0	0	0	0.0156639
8400	2968.3	1	0	1	0	0	0	0.0157022
8402	2968.34	1	0	1	0	0	0	0.0156467
8404	2968.37	1	0	1	0	0	0	0.0156362
8406	2968.4	1	0	1	0	0	0	0.015715
8408	2968.44	1	0	1	0	0	0	0.0156402
8410	2968.47	1	0	1	0	0	0	0.0156876
8412	2968.5	1	0	1	0	0	0	0.0156562
8414	2968.54	1	0	1	0	0	0	0.0156511
8416	2968.57	1	0	1	0	0	0	0.0156575
8418	2968.6	1	0	1	0	0	0	0.0156101
8420	2968.64	1	0	1	0	0	0	0.0156937
8422	2968.67	1	0	1	0	0	0	0.0156548
8424	2968.7	1	0	1	0	0	0	0.0156744
8426	2968.74	1	0	1	0	0	0	0.0156595
8428	2968.77	1	0	1	0	0	0	0.0156633
8430	2968.8	1	0	1	0	0	0	0.0157414
8432	2968.84	1	0	1	0	0	0	0.0157746
8434	2968.87	1	0	1	0	0	0	0.0157925
8436	2968.9	1	0	1	0	0	0	0.0158551
8438	2968.94	1	0	1	0	0	0	0.0158047
8440	2968.97	1	0	1	0	0	0	0.0155807
8442	2969	1	0	1	0	0	0	0.015511
8444	2969.04	1	0	1	0	0	0	0.0155556
8446	2969.07	1	0	1	0	0	0	0.0156687
8448	2969.1	1	0	1	0	0	0	0.0158003
8450	2969.14	1	0	1	0	0	0	0.0157452
8452	2969.17	1	0	1	0	0	0	0.0155414
8454	2969.2	1	0	1	0	0	0	0.0154656
8456	2969.24	1	0	1	0	0	0	0.015511
8458	2969.27	1	0	1	0	0	0	0.0155641
8460	2969.3	1	0	1	0	0	0	0.0153746
8462	2969.34	1	0	1	0	0	0	0.015205
8464	2969.37	1	0	1	0	0	0	0.015025
8466	2969.4	1	0	1	0	0	0	0.0150338
8468	2969.44	1	0	1	0	0	0	0.0150467
8470	2969.47	1	0	1	0	0	0	0.0151194
8472	2969.5	1	0	1	0	0	0	0.0151384
8474	2969.54	1	0	1	0	0	0	0.0152342
8476	2969.57	1	0	1	0	0	0	0.0154734
8478	2969.6	1	0	1	0	0	0	0.0156568
8480	2969.64	1	0	1	0	0	0	0.0157167
8482	2969.67	1	0	1	0	0	0	0.0157299
8484	2969.7	1	0	1	0	0	0	0.0157628
8486	2969.74	1	0	1	0	0	0	0.0157458
8488	2969.77	1	0	1	0	0	0	0.0158345
8490	2969.8	1	0	1	0	0	0	0.0159201
8492	2969.84	1	0	1	0	0	0	0.0157397
8494	2969.87	1	0	1	0	0	0	0.0157888
8496	2969.9	1	0	1	0	0	0	0.0157682
8498	2969.94	1	0	1	0	0	0	0.0156105
8500	2969.97	1	0	1	0	0	0	0.0155171
8502	2970	1	0	1	0	0	0	0.015579
8504	2970.04	1	0	1	0	0	0	0.0154944
8506	2970.07	1	0	1	0	0	0	0.0155658
8508	2970.1	1	0	1	0	0	0	0.0156196
8510	2970.14	1	0	1	0	0	0	0.0156166
8512	2970.17	1	0	1	0	0	0	0.0156254
8514	2970.2	1	0	1	0	0	0	0.0156572
8516	2970.24	1	0	1	0	0	0	0.0156067
8518	2970.27	1	0	1	0	0	0	0.0156023
8520	2970.3	1	0	1	0	0	0	0.015625
8522	2970.34	1	0	1	0	0	0	0.0156264
8524	2970.37	1	0	1	0	0	0	0.0156815
8526	2970.4	1	0	1	0	0	0	0.0156731
8528	2970.44	1	0	1	0	0	0	0.0155793
8530	2970.47	1	0	1	0	0	0	0.0156155
8532	2970.5	1	0	1	0	0	0	0.0156599
8534	2970.54	1	0	1	0	0	0	0.0156443
8536	2970.57	1	0	1	0	0	0	0.0156233
8538	2970.6	1	0	1	0	0	0	0.0156267
8540	2970.64	1	0	1	0	0	0	0.0156078
8542	2970.67	1	0	1	0	0	0	0.0155939
8544	2970.7	1	0	1	0	0	0	0.0156507
8546	2970.74	1	0	1	0	0	0	0.015622
8548	2970.77	1	0	1	0	0	0	0.015621
8550	2970.8	1	0	1	0	0	0	0.0156592
8552	2970.84	1	0	1	0	0	0	0.0156758
8554	2970.87	1	0	1	0	0	0	0.0156074
8556	2970.9	1	0	1	0	0	0	0.0156274
8558	2970.94	1	0	1	0	0	0	0.0155986
8560	2970.97	1	0	1	0	0	0	0.0156463
8562	2971	1	0	1	0	0	0	0.0156531
8564	2971.04	1	0	1	0	0	0	0.0155617
8566	2971.07	1	0	1	0	0	0	0.0155709
8568	2971.1	1	0	1	0	0	0	0.0155817
8570	2971.14	1	0	1	0	0	0	0.015603
8572	2971.17	1	0	1	0	0	0	0.015624
8574	2971.2	1	0	1	0	0	0	0.015623
8576	2971.24	1	0	1	0	0	0	0.0156399
8578	2971.27	1	0	1	0	0	0	0.0156111
8580	2971.3	1	0	1	0	0	0	0.0155963
8582	2971.34	1	0	1	0	0	0	0.015624
8584	2971.37	1	0	1	0	0	0	0.0156345
8586	2971.4	1	0	1	0	0	0	0.0156595
8588	2971.44	1	0	1	0	0	0	0.0155763
8590	2971.47	1	0	1	0	0	0	0.0155847
8592	2971.5	1	0	1	0	0	0	0.0156105
8594	2971.54	1	0	1	0	0	0	0.0156321
8596	2971.57	1	0	1	0	0	0	0.0156599
8598	2971.6	1	0	1	0	0	0	0.0155167
8600	2971.64	1	0	1	0	0	0	0.0155675
8602	2971.67	1	0	1	0	0	0	0.0155523
8604	2971.7	1	0	1	0	0	0	0.0154968
8606	2971.74	1	0	1	0	0	0	0.0153045
8608	2971.77	1	0	1	0	0	0	0.0153499
8610	2971.8	1	0	1	0	0	0	0.0153648
8612	2971.84	1	0	1	0	0	0	0.0152318
8614	2971.87	1	0	1	0	0	0	0.0153685
8616	2971.9	1	0	1	0	0	0	0.0154023
8618	2971.94	1	0	1	0	0	0	0.0153536
8620	2971.97	1	0	1	0	0	0	0.0154169
8622	2972	1	0	1	0	0	0	0.0152636
8624	2972.04	1	0	1	0	0	0	0.0154122
8626	2972.07	1	0	1	0	0	0	0.0153891
8628	2972.1	1	0	1	0	0	0	0.0153147
8630	2972.14	1	0	1	0	0	0	0.015448
8632	2972.17	1	0	1	0	0	0	0.0154331
8634	2972.2	1	0	1	0	0	0	0.0154047
8636	2972.24	1	0	1	0	0	0	0.0153665
8638	2972.27	1	0	1	0	0	0	0.0153157
8640	2972.3	1	0	1	0	0	0	0.0153624
8642	2972.34	1	0	1	0	0	0	0.015334
8644	2972.37	1	0	1	0	0	0	0.0152592
8646	2972.4	1	0	1	0	0	0	0.0152704
8648	2972.44	1	0	1	0	0	0	0.0152118
8650	2972.47	1	0	1	0	0	0	0.0151573
8652	2972.5	1	0	1	0	0	0	0.0151617
8654	2972.54	1	0	1	0	0	0	0.0151523
8656	2972.57	1	0	1	0	0	0	0.0151347
8658	2972.6	1	0	1	0	0	0	0.0151516
8660	2972.64	1	0	1	0	0	0	0.015113
8662	2972.67	1	0	1	0	0	0	0.0151458
8664	2972.7	1	0	1	0	0	0	0.0153431
8666	2972.74	1	0	1	0	0	0	0.0155401
8668	2972.77	1	0	1	0	0	0	0.0156453
8670	2972.8	1	0	1	0	0	0	0.0156355
8672	2972.84	1	0	1	0	0	0	0.0156985
8674	2972.87	1	0	1	0	0	0	0.0157753
8676	2972.9	1	0	1	0	0	0	0.0158047
8678	2972.94	1	0	1	0	0	0	0.0158128
8680	2972.97	1	0	1	0	0	0	0.0158551
8682	2973	1	0	1	0	0	0	0.0160443
8684	2973.04	1	0	1	0	0	0	0.0158639
8686	2973.07	1	0	1	0	0	0	0.0158294
8688	2973.1	1	0	1	0	0	0	0.0158196
8690	2973.14	1	0	1	0	0	0	0.0158054
8692	2973.17	1	0	1	0	0	0	0.0157729
8694	2973.2	1	0	1	0	0	0	0.0157316
8696	2973.24	1	0	1	0	0	0	0.0157983
8698	2973.27	1	0	1	0	0	0	0.015737
8700	2973.3	1	0	1	0	0	0	0.0159614
8702	2973.34	1	0	1	0	0	0	0.0160639
8704	2973.37	1	0	1	0	0	0	0.0162125
8706	2973.4	1	0	1	0	0	0	0.016178
8708	2973.44	1	0	1	0	0	0	0.0160551
8710	2973.47	1	0	1	0	0	0	0.01607
8712	2973.5	1	0	1	0	0	0	0.0158785
8714	2973.54	1	0	1	0	0	0	0.015735
8716	2973.57	1	0	1	0	0	0	0.0157089
8718	2973.6	1	0	1	0	0	0	0.0157425
8720	2973.64	1	0	1	0	0	0	0.0156291
8722	2973.67	1	0	1	0	0	0	0.0158142
8724	2973.7	1	0	1	0	0	0	0.0158274
8726	2973.74	1	0	1	0	0	0	0.0159106
8728	2973.77	1	0	1	0	0	0	0.0160034
8730	2973.8	1	0	1	0	0	0	0.0159262
8732	2973.84	1	0	1	0	0	0	0.0159387
8734	2973.87	1	0	1	0	0	0	0.0158125
8736	2973.9	1	0	1	0	0	0	0.0157543
8738	2973.94	1	0	1	0	0	0	0.0155512
8740	2973.97	1	0	1	0	0	0	0.0154866
8742	2974	1	0	1	0	0	0	0.0155042
8744	2974.04	1	0	1	0	0	0	0.0154704
8746	2974.07	1	0	1	0	0	0	0.0155083
8748	2974.1	1	0	1	0	0	0	0.0155049
8750	2974.14	1	0	1	0	0	0	0.0156633
8752	2974.17	1	0	1	0	0	0	0.0158034
8754	2974.2	1	0	1	0	0	0	0.0158656
8756	2974.24	1	0	1	0	0	0	0.0159736
8758	2974.27	1	0	1	0	0	0	0.015936
8760	2974.3	1	0	1	0	0	0	0.0159712
8762	2974.34	1	0	1	0	0	0	0.0157506
8764	2974.37	1	0	1	0	0	0	0.0156511
8766	2974.4	1	0	1	0	0	0	0.0156897
8768	2974.44	1	0	1	0	0	0	0.0154988
8770	2974.47	1	0	1	0	0	0	0.0154717
8772	2974.5	1	0	1	0	0	0	0.0154111
8774	2974.54	1	0	1	0	0	0	0.0155455
8776	2974.57	1	0	1	0	0	0	0.0153563
8778	2974.6	1	0	1	0	0	0	0.0153919
8780	2974.64	1	0	1	0	0	0	0.0154243
8782	2974.67	1	0	1	0	0	0	0.0155726
8784	2974.7	1	0	1	0	0	0	0.0155648
8786	2974.74	1	0	1	0	0	0	0.0157161
8788	2974.77	1	0	1	0	0	0	0.0158247
8790	2974.8	1	0	1	0	0	0	0.0158243
8792	2974.84	1	0	1	0	0	0	0.0158504
8794	2974.87	1	0	1	0	0	0	0.0159485
8796	2974.9	1	0	1	0	0	0	0.0158125
8798	2974.94	1	0	1	0	0	0	0.0156795
8800	2974.97	1	0	1	0	0	0	0.0157127
8802	2975	1	0	1	0	0	0	0.0159022
8804	2975.04	1	0	1	0	0	0	0.0157851
8806	2975.07	1	0	1	0	0	0	0.0158419
8808	2975.1	1	0	1	0	0	0	0.0157137
8810	2975.14	1	0	1	0	0	0	0.0158491
8812	2975.17	1	0	1	0	0	0	0.0157323
8814	2975.2	1	0	1	0	0	0	0.0156409
8816	2975.24	1	0	1	0	0	0	0.0156812
8818	2975.27	1	0	1	0	0	0	0.0156477
8820	2975.3	1	0	1	0	0	0	0.0155472
8822	2975.34	1	0	1	0	0	0	0.0155553
8824	2975.37	1	0	1	0	0	0	0.0155418
8826	2975.4	1	0	1	0	0	0	0.015643
8828	2975.44	1	0	1	0	0	0	0.0155688
8830	2975.47	1	0	1	0	0	0	0.0155025
8832	2975.5	1	0	1	0	0	0	0.0154988
8834	2975.54	1	0	1	0	0	0	0.0154913
8836	2975.57	1	0	1	0	0	0	0.0155205
8838	2975.6	1	0	1	0	0	0	0.015558
8840	2975.64	1	0	1	0	0	0	0.0155276
8842	2975.67	1	0	1	0	0	0	0.0155631
8844	2975.7	1	0	1	0	0	0	0.0155445
8846	2975.74	1	0	1	0	0	0	0.0154392
8848	2975.77	1	0	1	0	0	0	0.0152727
8850	2975.8	1	0	1	0	0	0	0.0150822
8852	2975.84	1	0	1	0	0	0	0.0151282
8854	2975.87	1	0	1	0	0	0	0.0152257
8856	2975.9	1	0	1	0	0	0	0.0153756
8858	2975.94	1	0	1	0	0	0	0.0154616
8860	2975.97	1	0	1	0	0	0	0.0154145
8862	2976	1	0	1	0	0	0	0.0154595
8864	2976.04	1	0	1	0	0	0	0.0154534
8866	2976.07	1	0	1	0	0	0	0.0155847
8868	2976.1	1	0	1	0	0	0	0.0156697
8870	2976.14	1	0	1	0	0	0	0.0155739
8872	2976.17	1	0	1	0	0	0	0.0154064
8874	2976.2	1	0	1	0	0	0	0.0153753
8876	2976.24	1	0	1	0	0	0	0.0154548
8878	2976.27	1	0	1	0	0	0	0.0154369
8880	2976.3	1	0	1	0	0	0	0.0153885
8882	2976.34	1	0	1	0	0	0	0.0154643
8884	2976.37	1	0	1	0	0	0	0.0153773
8886	2976.4	1	0	1	0	0	0	0.0154081
8888	2976.44	1	0	1	0	0	0	0.0153814
8890	2976.47	1	0	1	0	0	0	0.0154511
8892	2976.5	1	0	1	0	0	0	0.0154663
8894	2976.54	1	0	1	0	0	0	0.0154971
8896	2976.57	1	0	1	0	0	0	0.0154853
8898	2976.6	1	0	1	0	0	0	0.0154436
8900	2976.64	1	0	1	0	0	0	0.015512
8902	2976.67	1	0	1	0	0	0	0.0154524
8904	2976.7	1	0	1	0	0	0	0.0154869
8906	2976.74	1	0	1	0	0	0	0.0154135
8908	2976.77	1	0	1	0	0	0	0.015422
8910	2976.8	1	0	1	0	0	0	0.0154355
8912	2976.84	1	0	1	0	0	0	0.015382
8914	2976.87	1	0	1	0	0	0	0.0154189
8916	2976.9	1	0	1	0	0	0	0.0155191
8918	2976.94	1	0	1	0	0	0	0.0154294
8920	2976.97	1	0	1	0	0	0	0.0155079
8922	2977	1	0	1	0	0	0	0.0156169
8924	2977.04	1	0	1	0	0	0	0.015802
8926	2977.07	1	0	1	0	0	0	0.0158142
8928	2977.1	1	0	1	0	0	0	0.0158876
8930	2977.14	1	0	1	0	0	0	0.0159171
8932	2977.17	1	0	1	0	0	0	0.015957
8934	2977.2	1	0	1	0	0	0	0.0159705
8936	2977.24	1	0	1	0	0	0	0.0160311
8938	2977.27	1	0	1	0	0	0	0.0160145
8940	2977.3	1	0	1	0	0	0	0.015824
8942	2977.34	1	0	1	0	0	0	0.0158406
8944	2977.37	1	0	1	0	0	0	0.0155543
8946	2977.4	1	0	1	0	0	0	0.0154084
8948	2977.44	1	0	1	0	0	0	0.0155817
8950	2977.47	1	0	1	0	0	0	0.0155506
8952	2977.5	1	0	1	0	0	0	0.0155587
8954	2977.54	1	0	1	0	0	0	0.015555
8956	2977.57	1	0	1	0	0	0	0.015601
8958	2977.6	1	0	1	0	0	0	0.0154314
8960	2977.64	1	0	1	0	0	0	0.0152636
8962	2977.67	1	0	1	0	0	0	0.0153671
8964	2977.7	1	0	1	0	0	0	0.0152582
8966	2977.74	1	0	1	0	0	0	0.0152524
8968	2977.77	1	0	1	0	0	0	0.0152853
8970	2977.8	1	0	1	0	0	0	0.0151526
8972	2977.84	1	0	1	0	0	0	0.0150044
8974	2977.87	1	0	1	0	0	0	0.0149638
8976	2977.9	1	0	1	0	0	0	0.0151035
8978	2977.94	1	0	1	0	0	0	0.015226
8980	2977.97	1	0	1	0	0	0	0.0153604
8982	2978	1	0	1	0	0	0	0.0153526
8984	2978.04	1	0	1	0	0	0	0.0152656
8986	2978.07	1	0	1	0	0	0	0.0153343
8988	2978.1	1	0	1	0	0	0	0.0153072
8990	2978.14	1	0	1	0	0	0	0.0153502
8992	2978.17	1	0	1	0	0	0	0.0153414
8994	2978.2	1	0	1	0	0	0	0.0152697
8996	2978.24	1	0	1	0	0	0	0.0155969
8998	2978.27	1	0	1	0	0	0	0.0156507
9000	2978.3	1	0	1	0	0	0	0.015687
9002	2978.34	1	0	1	0	0	0	0.0158362
9004	2978.37	1	0	1	0	0	0	0.0157719
9006	2978.4	1	0	1	0	0	0	0.0156748
9008	2978.44	1	0	1	0	0	0	0.0158271
9010	2978.47	1	0	1	0	0	0	0.0157333
9012	2978.5	1	0	1	0	0	0	0.0156135
9014	2978.54	1	0	1	0	0	0	0.0156734
9016	2978.57	1	0	1	0	0	0	0.0155353
9018	2978.6	1	0	1	0	0	0	0.0154132
9020	2978.64	1	0	1	0	0	0	0.0155313
9022	2978.67	1	0	1	0	0	0	0.0154585
9024	2978.7	1	0	1	0	0	0	0.0153895
9026	2978.74	1	0	1	0	0	0	0.0154291
9028	2978.77	1	0	1	0	0	0	0.0152795
9030	2978.8	1	0	1	0	0	0	0.0153881
9032	2978.84	1	0	1	0	0	0	0.0153309
9034	2978.87	1	0	1	0	0	0	0.0152321
9036	2978.9	1	0	1	0	0	0	0.0154643
9038	2978.94	1	0	1	0	0	0	0.0155235
9040	2978.97	1	0	1	0	0	0	0.0154548
9042	2979	1	0	1	0	0	0	0.0155946
9044	2979.04	1	0	1	0	0	0	0.0157252
9046	2979.07	1	0	1	0	0	0	0.0157194
9048	2979.1	1	0	1	0	0	0	0.0156315
9050	2979.14	1	0	1	0	0	0	0.0157056
9052	2979.17	1	0	1	0	0	0	0.0155756
9054	2979.2	1	0	1	0	0	0	0.0155106
9056	2979.24	1	0	1	0	0	0	0.0155506
9058	2979.27	1	0	1	0	0	0	0.0155902
9060	2979.3	1	0	1	0	0	0	0.0155225
9062	2979.34	1	0	1	0	0	0	0.015536
9064	2979.37	1	0	1	0	0	0	0.0155171
9066	2979.4	1	0	1	0	0	0	0.0155509
9068	2979.44	1	0	1	0	0	0	0.0156369
9070	2979.47	1	0	1	0	0	0	0.0156765
9072	2979.5	1	0	1	0	0	0	0.0155932
9074	2979.54	1	0	1	0	0	0	0.0155543
9076	2979.57	1	0	1	0	0	0	0.0155039
9078	2979.6	1	0	1	0	0	0	0.0155489
9080	2979.64	1	0	1	0	0	0	0.0155424
9082	2979.67	1	0	1	0	0	0	0.0156105
9084	2979.7	1	0	1	0	0	0	0.0154988
9086	2979.74	1	0	1	0	0	0	0.015554
9088	2979.77	1	0	1	0	0	0	0.0156741
9090	2979.8	1	0	1	0	0	0	0.0156457
9092	2979.84	1	0	1	0	0	0	0.0156914
9094	2979.87	1	0	1	0	0	0	0.0154226
9096	2979.9	1	0	1	0	0	0	0.0153583
9098	2979.94	1	0	1	0	0	0	0.0154379
9100	2979.97	1	0	1	0	0	0	0.0154331
9102	2980	1	0	1	0	0	0	0.0153817
9104	2980.04	1	0	1	0	0	0	0.0153607
9106	2980.07	1	0	1	0	0	0	0.0153306
9108	2980.1	1	0	1	0	0	0	0.0152819
9110	2980.14	1	0	1	0	0	0	0.0152115
9112	2980.17	1	0	1	0	0	0	0.0152802
9114	2980.2	1	0	1	0	0	0	0.0150998
9116	2980.24	1	0	1	0	0	0	0.0150115
9118	2980.27	1	0	1	0	0	0	0.0152199
9120	2980.3	1	0	1	0	0	0	0.0154007
9122	2980.34	1	0	1	0	0	0	0.0154626
9124	2980.37	1	0	1	0	0	0	0.0155468
9126	2980.4	1	0	1	0	0	0	0.0156389
9128	2980.44	1	0	1	0	0	0	0.015711
9130	2980.47	1	0	1	0	0	0	0.0157201
9132	2980.5	1	0	1	0	0	0	0.0158274
9134	2980.54	1	0	1	0	0	0	0.0158071
9136	2980.57	1	0	1	0	0	0	0.0157414
9138	2980.6	1	0	1	0	0	0	0.0158582
9140	2980.64	1	0	1	0	0	0	0.0159096
9142	2980.67	1	0	1	0	0	0	0.0158738
9144	2980.7	1	0	1	0	0	0	0.0157776
9146	2980.74	1	0	1	0	0	0	0.0157526
9148	2980.77	1	0	1	0	0	0	0.0157428
9150	2980.8	1	0	1	0	0	0	0.0157059
9152	2980.84	1	0	1	0	0	0	0.0157428
9154	2980.87	1	0	1	0	0	0	0.0157905
9156	2980.9	1	0	1	0	0	0	0.0158511
9158	2980.94	1	0	1	0	0	0	0.0158474
9160	2980.97	1	0	1	0	0	0	0.0157533
9162	2981	1	0	1	0	0	0	0.0157502
9164	2981.04	1	0	1	0	0	0	0.0157438
9166	2981.07	1	0	1	0	0	0	0.015758
9168	2981.1	1	0	1	0	0	0	0.0157313
9170	2981.14	1	0	1	0	0	0	0.0157688
9172	2981.17	1	0	1	0	0	0	0.015734
9174	2981.2	1	0	1	0	0	0	0.0157438
9176	2981.24	1	0	1	0	0	0	0.0157604
9178	2981.27	1	0	1	0	0	0	0.0157411
9180	2981.3	1	0	1	0	0	0	0.0157546
9182	2981.34	1	0	1	0	0	0	0.0157526
9184	2981.37	1	0	1	0	0	0	0.0157773
9186	2981.4	1	0	1	0	0	0	0.0157699
9188	2981.44	1	0	1	0	0	0	0.0157462
9190	2981.47	1	0	1	0	0	0	0.015693
9192	2981.5	1	0	1	0	0	0	0.01571
9194	2981.54	1	0	1	0	0	0	0.0156636
9196	2981.57	1	0	1	0	0	0	0.015643
9198	2981.6	1	0	1	0	0	0	0.0156524
9200	2981.64	1	0	1	0	0	0	0.0155705
9202	2981.67	1	0	1	0	0	0	0.0154903
9204	2981.7	1	0	1	0	0	0	0.0155682
9206	2981.74	1	0	1	0	0	0	0.0157851
9208	2981.77	1	0	1	0	0	0	0.0156873
9210	2981.8	1	0	1	0	0	0	0.0156396
9212	2981.84	1	0	1	0	0	0	0.0156084
9214	2981.87	1	0	1	0	0	0	0.0155807
9216	2981.9	1	0	1	0	0	0	0.0153831
9218	2981.94	1	0	1	0	0	0	0.0153932
9220	2981.97	1	0	1	0	0	0	0.0154308
9222	2982	1	0	1	0	0	0	0.0153983
9224	2982.04	1	0	1	0	0	0	0.0155093
9226	2982.07	1	0	1	0	0	0	0.0155045
9228	2982.1	1	0	1	0	0	0	0.0157685
9230	2982.14	1	0	1	0	0	0	0.0158548
9232	2982.17	1	0	1	0	0	0	0.0158998
9234	2982.2	1	0	1	0	0	0	0.015865
9236	2982.24	1	0	1	0	0	0	0.0158663
9238	2982.27	1	0	1	0	0	0	0.0158639
9240	2982.3	1	0	1	0	0	0	0.0157942
9242	2982.34	1	0	1	0	0	0	0.0157032
9244	2982.37	1	0	1	0	0	0	0.0158521
9246	2982.4	1	0	1	0	0	0	0.0157624
9248	2982.44	1	0	1	0	0	0	0.0156964
9250	2982.47	1	0	1	0	0	0	0.0156575
9252	2982.5	1	0	1	0	0	0	0.0155912
9254	2982.54	1	0	1	0	0	0	0.0155404
9256	2982.57	1	0	1	0	0	0	0.0156135
9258	2982.6	1	0	1	0	0	0	0.0155709
9260	2982.64	1	0	1	0	0	0	0.0156013
9262	2982.67	1	0	1	0	0	0	0.0154159
9264	2982.7	1	0	1	0	0	0	0.0153898
9266	2982.74	1	0	1	0	0	0	0.0154707
9268	2982.77	1	0	1	0	0	0	0.0156524
9270	2982.8	1	0	1	0	0	0	0.015733
9272	2982.84	1	0	1	0	0	0	0.0157888
9274	2982.87	1	0	1	0	0	0	0.0156765
9276	2982.9	1	0	1	0	0	0	0.0156765
9278	2982.94	1	0	1	0	0	0	0.0157513
9280	2982.97	1	0	1	0	0	0	0.0158457
9282	2983	1	0	1	0	0	0	0.0158609
9284	2983.04	1	0	1	0	0	0	0.0157475
9286	2983.07	1	0	1	0	0	0	0.015802
9288	2983.1	1	0	1	0	0	0	0.0157739
9290	2983.14	1	0	1	0	0	0	0.0157942
9292	2983.17	1	0	1	0	0	0	0.0157871
9294	2983.2	1	0	1	0	0	0	0.01567
9296	2983.24	1	0	1	0	0	0	0.0155692
9298	2983.27	1	0	1	0	0	0	0.0158359
9300	2983.3	1	0	1	0	0	0	0.0157577
9302	2983.34	1	0	1	0	0	0	0.015757
9304	2983.37	1	0	1	0	0	0	0.0158206
9306	2983.4	1	0	1	0	0	0	0.0158924
9308	2983.44	1	0	1	0	0	0	0.0158859
9310	2983.47	1	0	1	0	0	0	0.0158487
9312	2983.5	1	0	1	0	0	0	0.0158724
9314	2983.54	1	0	1	0	0	0	0.0158815
9316	2983.57	1	0	1	0	0	0	0.0159103
9318	2983.6	1	0	1	0	0	0	0.0158548
9320	2983.64	1	0	1	0	0	0	0.0158623
9322	2983.67	1	0	1	0	0	0	0.0158562
9324	2983.7	1	0	1	0	0	0	0.0158091
9326	2983.74	1	0	1	0	0	0	0.0158128
9328	2983.77	1	0	1	0	0	0	0.0156778
9330	2983.8	1	0	1	0	0	0	0.0157858
9332	2983.84	1	0	1	0	0	0	0.0155255
9334	2983.87	1	0	1	0	0	0	0.0154125
9336	2983.9	1	0	1	0	0	0	0.015667
9338	2983.94	1	0	1	0	0	0	0.0156122
9340	2983.97	1	0	1	0	0	0	0.015602
9342	2984	1	0	1	0	0	0	0.0155682
9344	2984.04	1	0	1	0	0	0	0.0155235
9346	2984.07	1	0	1	0	0	0	0.0154264
9348	2984.1	1	0	1	0	0	0	0.0154362
9350	2984.14	1	0	1	0	0	0	0.0155705
9352	2984.17	1	0	1	0	0	0	0.0157265
9354	2984.2	1	0	1	0	0	0	0.0157661
9356	2984.24	1	0	1	0	0	0	0.0158433
9358	2984.27	1	0	1	0	0	0	0.0157672
9360	2984.3	1	0	1	0	0	0	0.0157675
9362	2984.34	1	0	1	0	0	0	0.0156203
9364	2984.37	1	0	1	0	0	0	0.0154927
9366	2984.4	1	0	1	0	0	0	0.0153709
9368	2984.44	1	0	1	0	0	0	0.015511
9370	2984.47	1	0	1	0	0	0	0.015425
9372	2984.5	1	0	1	0	0	0	0.0154775
9374	2984.54	1	0	1	0	0	0	0.0155915
9376	2984.57	1	0	1	0	0	0	0.0154562
9378	2984.6	1	0	1	0	0	0	0.0154572
9380	2984.64	1	0	1	0	0	0	0.0155374
9382	2984.67	1	0	1	0	0	0	0.0154477
9384	2984.7	1	0	1	0	0	0	0.0154903
9386	2984.74	1	0	1	0	0	0	0.0155699
9388	2984.77	1	0	1	0	0	0	0.0155093
9390	2984.8	1	0	1	0	0	0	0.0155421
9392	2984.84	1	0	1	0	0	0	0.015604
9394	2984.87	1	0	1	0	0	0	0.0155824
9396	2984.9	1	0	1	0	0	0	0.015538
9398	2984.94	1	0	1	0	0	0	0.0155607
9400	2984.97	1	0	1	0	0	0	0.0155022
9402	2985	1	0	1	0	0	0	0.015536
9404	2985.04	1	0	1	0	0	0	0.0155323
9406	2985.07	1	0	1	0	0	0	0.0155929
9408	2985.1	1	0	1	0	0	0	0.0156213
9410	2985.14	1	0	1	0	0	0	0.0157584
9412	2985.17	1	0	1	0	0	0	0.0157475
9414	2985.2	1	0	1	0	0	0	0.0157269
9416	2985.24	1	0	1	0	0	0	0.0157198
9418	2985.27	1	0	1	0	0	0	0.0157732
9420	2985.3	1	0	1	0	0	0	0.0157797
9422	2985.34	1	0	1	0	0	0	0.0158088
9424	2985.37	1	0	1	0	0	0	0.0157326
9426	2985.4	1	0	1	0	0	0	0.015754
9428	2985.44	1	0	1	0	0	0	0.0157871
9430	2985.47	1	0	1	0	0	0	0.0157205
9432	2985.5	1	0	1	0	0	0	0.0157905
9434	2985.54	1	0	1	0	0	0	0.0157854
9436	2985.57	1	0	1	0	0	0	0.0157699
9438	2985.6	1	0	1	0	0	0	0.0157421
9440	2985.64	1	0	1	0	0	0	0.0157641
9442	2985.67	1	0	1	0	0	0	0.0158149
9444	2985.7	1	0	1	0	0	0	0.0157783
9446	2985.74	1	0	1	0	0	0	0.0158494
9448	2985.77	1	0	1	0	0	0	0.0158291
9450	2985.8	1	0	1	0	0	0	0.0158112
9452	2985.84	1	0	1	0	0	0	0.0158663
9454	2985.87	1	0	1	0	0	0	0.0158179
9456	2985.9	1	0	1	0	0	0	0.0157106
9458	2985.94	1	0	1	0	0	0	0.0156514
9460	2985.97	1	0	1	0	0	0	0.0157374
9462	2986	1	0	1	0	0	0	0.0157513
9464	2986.04	1	0	1	0	0	0	0.0157672
9466	2986.07	1	0	1	0	0	0	0.0158741
9468	2986.1	1	0	1	0	0	0	0.0158612
9470	2986.14	1	0	1	0	0	0	0.0159428
9472	2986.17	1	0	1	0	0	0	0.0158551
9474	2986.2	1	0	1	0	0	0	0.0158565
9476	2986.24	1	0	1	0	0	0	0.0158805
9478	2986.27	1	0	1	0	0	0	0.0158443
9480	2986.3	1	0	1	0	0	0	0.0157993
9482	2986.34	1	0	1	0	0	0	0.0159353
9484	2986.37	1	0	1	0	0	0	0.0158169
9486	2986.4	1	0	1	0	0	0	0.0158392
9488	2986.44	1	0	1	0	0	0	0.0158524
9490	2986.47	1	0	1	0	0	0	0.0158125
9492	2986.5	1	0	1	0	0	0	0.0157397
9494	2986.54	1	0	1	0	0	0	0.0158172
9496	2986.57	1	0	1	0	0	0	0.0156771
9498	2986.6	1	0	1	0	0	0	0.015692
9500	2986.64	1	0	1	0	0	0	0.0157106
9502	2986.67	1	0	1	0	0	0	0.0157076
9504	2986.7	1	0	1	0	0	0	0.0156714
9506	2986.74	1	0	1	0	0	0	0.0156968
9508	2986.77	1	0	1	0	0	0	0.0157445
9510	2986.8	1	0	1	0	0	0	0.0156842
9512	2986.84	1	0	1	0	0	0	0.0156954
9514	2986.87	1	0	1	0	0	0	0.0156507
9516	2986.9	1	0	1	0	0	0	0.0155577
9518	2986.94	1	0	1	0	0	0	0.0156396
9520	2986.97	1	0	1	0	0	0	0.0156396
9522	2987	1	0	1	0	0	0	0.0157201
9524	2987.04	1	0	1	0	0	0	0.0157211
9526	2987.07	1	0	1	0	0	0	0.0157709
9528	2987.1	1	0	1	0	0	0	0.0158139
9530	2987.14	1	0	1	0	0	0	0.0158095
9532	2987.17	1	0	1	0	0	0	0.0158017
9534	2987.2	1	0	1	0	0	0	0.0157397
9536	2987.24	1	0	1	0	0	0	0.0158149
9538	2987.27	1	0	1	0	0	0	0.0157286
9540	2987.3	1	0	1	0	0	0	0.015668
9542	2987.34	1	0	1	0	0	0	0.0157171
9544	2987.37	1	0	1	0	0	0	0.0157012
9546	2987.4	1	0	1	0	0	0	0.0156501
9548	2987.44	1	0	1	0	0	0	0.0156788
9550	2987.47	1	0	1	0	0	0	0.0156054
9552	2987.5	1	0	1	0	0	0	0.0155881
9554	2987.54	1	0	1	0	0	0	0.0155881
9556	2987.57	1	0	1	0	0	0	0.0155594
9558	2987.6	1	0	1	0	0	0	0.015626
9560	2987.64	1	0	1	0	0	0	0.015671
9562	2987.67	1	0	1	0	0	0	0.0156653
9564	2987.7	1	0	1	0	0	0	0.0156886
9566	2987.74	1	0	1	0	0	0	0.0156027
9568	2987.77	1	0	1	0	0	0	0.0155018
9570	2987.8	1	0	1	0	0	0	0.0154348
9572	2987.84	1	0	1	0	0	0	0.0154193
9574	2987.87	1	0	1	0	0	0	0.0154423
9576	2987.9	1	0	1	0	0	0	0.0153878
9578	2987.94	1	0	1	0	0	0	0.0154446
9580	2987.97	1	0	1	0	0	0	0.015645
9582	2988	1	0	1	0	0	0	0.0155265
9584	2988.04	1	0	1	0	0	0	0.0154426
9586	2988.07	1	0	1	0	0	0	0.0155685
9588	2988.1	1	0	1	0	0	0	0.0156595
9590	2988.14	1	0	1	0	0	0	0.0156568
9592	2988.17	1	0	1	0	0	0	0.0158281
9594	2988.2	1	0	1	0	0	0	0.015868
9596	2988.24	1	0	1	0	0	0	0.0158257
9598	2988.27	1	0	1	0	0	0	0.0158677
9600	2988.3	1	0	1	0	0	0	0.0157969
9602	2988.34	1	0	1	0	0	0	0.0156504
9604	2988.37	1	0	1	0	0	0	0.0157211
9606	2988.4	1	0	1	0	0	0	0.0157976
9608	2988.44	1	0	1	0	0	0	0.0158155
9610	2988.47	1	0	1	0	0	0	0.0157912
9612	2988.5	1	0	1	0	0	0	0.0156599
9614	2988.54	1	0	1	0	0	0	0.0157614
9616	2988.57	1	0	1	0	0	0	0.0158223
9618	2988.6	1	0	1	0	0	0	0.0158044
9620	2988.64	1	0	1	0	0	0	0.0158409
9622	2988.67	1	0	1	0	0	0	0.0157746
9624	2988.7	1	0	1	0	0	0	0.0157235
9626	2988.74	1	0	1	0	0	0	0.0158216
9628	2988.77	1	0	1	0	0	0	0.01587
9630	2988.8	1	0	1	0	0	0	0.0157902
9632	2988.84	1	0	1	0	0	0	0.0158342
9634	2988.87	1	0	1	0	0	0	0.0158541
9636	2988.9	1	0	1	0	0	0	0.015866
9638	2988.94	1	0	1	0	0	0	0.0158788
9640	2988.97	1	0	1	0	0	0	0.0158501
9642	2989	1	0	1	0	0	0	0.0158592
9644	2989.04	1	0	1	0	0	0	0.0159049
9646	2989.07	1	0	1	0	0	0	0.0158078
9648	2989.1	1	0	1	0	0	0	0.0159289
9650	2989.14	1	0	1	0	0	0	0.0157919
9652	2989.17	1	0	1	0	0	0	0.0157259
9654	2989.2	1	0	1	0	0	0	0.0156937
9656	2989.24	1	0	1	0	0	0	0.0154937
9658	2989.27	1	0	1	0	0	0	0.015536
9660	2989.3	1	0	1	0	0	0	0.0155763
9662	2989.34	1	0	1	0	0	0	0.0155049
9664	2989.37	1	0	1	0	0	0	0.0154893
9666	2989.4	1	0	1	0	0	0	0.0155475
9668	2989.44	1	0	1	0	0	0	0.0155279
9670	2989.47	1	0	1	0	0	0	0.0154758
9672	2989.5	1	0	1	0	0	0	0.0154866
9674	2989.54	1	0	1	0	0	0	0.0155563
9676	2989.57	1	0	1	0	0	0	0.0154585
9678	2989.6	1	0	1	0	0	0	0.0153627
9680	2989.64	1	0	1	0	0	0	0.0154815
9682	2989.67	1	0	1	0	0	0	0.0153925
9684	2989.7	1	0	1	0	0	0	0.0153133
9686	2989.74	1	0	1	0	0	0	0.015424
9688	2989.77	1	0	1	0	0	0	0.0155932
9690	2989.8	1	0	1	0	0	0	0.0156034
9692	2989.84	1	0	1	0	0	0	0.0153624
9694	2989.87	1	0	1	0	0	0	0.0154639
9696	2989.9	1	0	1	0	0	0	0.0156947
9698	2989.94	1	0	1	0	0	0	0.0156951
9700	2989.97	1	0	1	0	0	0	0.0157966
9702	2990	1	0	1	0	0	0	0.0158677
9704	2990.04	1	0	1	0	0	0	0.0159394
9706	2990.07	1	0	1	0	0	0	0.0160294
9708	2990.1	1	0	1	0	0	0	0.0159861
9710	2990.14	1	0	1	0	0	0	0.0160406
9712	2990.17	1	0	1	0	0	0	0.0158761
9714	2990.2	1	0	1	0	0	0	0.0158105
9716	2990.24	1	0	1	0	0	0	0.0157959
9718	2990.27	1	0	1	0	0	0	0.0156876
9720	2990.3	1	0	1	0	0	0	0.0155276
9722	2990.34	1	0	1	0	0	0	0.015536
9724	2990.37	1	0	1	0	0	0	0.0154325
9726	2990.4	1	0	1	0	0	0	0.0154331
9728	2990.44	1	0	1	0	0	0	0.015467
9730	2990.47	1	0	1	0	0	0	0.015538
9732	2990.5	1	0	1	0	0	0	0.015554
9734	2990.54	1	0	1	0	0	0	0.0155374
9736	2990.57	1	0	1	0	0	0	0.0155235
9738	2990.6	1	0	1	0	0	0	0.0156125
9740	2990.64	1	0	1	0	0	0	0.0156135
9742	2990.67	1	0	1	0	0	0	0.0156172
9744	2990.7	1	0	1	0	0	0	0.0155905
9746	2990.74	1	0	1	0	0	0	0.0155908
9748	2990.77	1	0	1	0	0	0	0.0155661
9750	2990.8	1	0	1	0	0	0	0.0155983
9752	2990.84	1	0	1	0	0	0	0.0156027
9754	2990.87	1	0	1	0	0	0	0.0156216
9756	2990.9	1	0	1	0	0	0	0.0156
9758	2990.94	1	0	1	0	0	0	0.0155472
9760	2990.97	1	0	1	0	0	0	0.0155824
9762	2991	1	0	1	0	0	0	0.0156179
9764	2991.04	1	0	1	0	0	0	0.0156396
9766	2991.07	1	0	1	0	0	0	0.0155018
9768	2991.1	1	0	1	0	0	0	0.0155012
9770	2991.14	1	0	1	0	0	0	0.015554
9772	2991.17	1	0	1	0	0	0	0.0156741
9774	2991.2	1	0	1	0	0	0	0.0154328
9776	2991.24	1	0	1	0	0	0	0.0154186
9778	2991.27	1	0	1	0	0	0	0.0156115
9780	2991.3	1	0	1	0	0	0	0.01558
9782	2991.34	1	0	1	0	0	0	0.0155208
9784	2991.37	1	0	1	0	0	0	0.0154589
9786	2991.4	1	0	1	0	0	0	0.0155008
9788	2991.44	1	0	1	0	0	0	0.0155563
9790	2991.47	1	0	1	0	0	0	0.0154267
9792	2991.5	1	0	1	0	0	0	0.0153144
9794	2991.54	1	0	1	0	0	0	0.0153932
9796	2991.57	1	0	1	0	0	0	0.0153191
9798	2991.6	1	0	1	0	0	0	0.0152934
9800	2991.64	1	0	1	0	0	0	0.0153756
9802	2991.67	1	0	1	0	0	0	0.0155343
9804	2991.7	1	0	1	0	0	0	0.0155533
9806	2991.74	1	0	1	0	0	0	0.0154314
9808	2991.77	1	0	1	0	0	0	0.0153854
9810	2991.8	1	0	1	0	0	0	0.0153116
9812	2991.84	1	0	1	0	0	0	0.0153174
9814	2991.87	1	0	1	0	0	0	0.0153908
9816	2991.9	1	0	1	0	0	0	0.0152724
9818	2991.94	1	0	1	0	0	0	0.0153279
9820	2991.97	1	0	1	0	0	0	0.015314
9822	2992	1	0	1	0	0	0	0.01536
9824	2992.04	1	0	1	0	0	0	0.015337
9826	2992.07	1	0	1	0	0	0	0.0153276
9828	2992.1	1	0	1	0	0	0	0.0153201
9830	2992.14	1	0	1	0	0	0	0.0153188
9832	2992.17	1	0	1	0	0	0	0.0153573
9834	2992.2	1	0	1	0	0	0	0.0153211
9836	2992.24	1	0	1	0	0	0	0.0153391
9838	2992.27	1	0	1	0	0	0	0.0153238
9840	2992.3	1	0	1	0	0	0	0.0153235
9842	2992.34	1	0	1	0	0	0	0.0153847
9844	2992.37	1	0	1	0	0	0	0.0153512
9846	2992.4	1	0	1	0	0	0	0.0154111
9848	2992.44	1	0	1	0	0	0	0.0154118
9850	2992.47	1	0	1	0	0	0	0.0153939
9852	2992.5	1	0	1	0	0	0	0.0153756
9854	2992.54	1	0	1	0	0	0	0.0153739
9856	2992.57	1	0	1	0	0	0	0.0153942
9858	2992.6	1	0	1	0	0	0	0.0153875
9860	2992.64	1	0	1	0	0	0	0.0154734
9862	2992.67	1	0	1	0	0	0	0.0153814
9864	2992.7	1	0	1	0	0	0	0.0154545
9866	2992.74	1	0	1	0	0	0	0.0155211
9868	2992.77	1	0	1	0	0	0	0.0153732
9870	2992.8	1	0	1	0	0	0	0.0153171
9872	2992.84	1	0	1	0	0	0	0.0152643
9874	2992.87	1	0	1	0	0	0	0.0153242
9876	2992.9	1	0	1	0	0	0	0.0152182
9878	2992.94	1	0	1	0	0	0	0.0152734
9880	2992.97	1	0	1	0	0	0	0.0152298
9882	2993	1	0	1	0	0	0	0.0151137
9884	2993.04	1	0	1	0	0	0	0.0151766
9886	2993.07	1	0	1	0	0	0	0.0151814
9888	2993.1	1	0	1	0	0	0	0.0150409
9890	2993.14	1	0	1	0	0	0	0.0149022
9892	2993.17	1	0	1	0	0	0	0.0148632
9894	2993.2	1	0	1	0	0	0	0.0147472
9896	2993.24	1	0	1	0	0	0	0.0147066
9898	2993.27	1	0	1	0	0	0	0.0149313
9900	2993.3	1	0	1	0	0	0	0.0149587
9902	2993.34	1	0	1	0	0	0	0.014956
9904	2993.37	1	0	1	0	0	0	0.0151435
9906	2993.4	1	0	1	0	0	0	0.0154125
9908	2993.44	1	0	1	0	0	0	0.0153289
9910	2993.47	1	0	1	0	0	0	0.0152839
9912	2993.5	1	0	1	0	0	0	0.0151824
9914	2993.54	1	0	1	0	0	0	0.0153397
9916	2993.57	1	0	1	0	0	0	0.0155323
9918	2993.6	1	0	1	0	0	0	0.0154883
9920	2993.64	1	0	1	0	0	0	0.0153052
9922	2993.67	1	0	1	0	0	0	0.0152633
9924	2993.7	1	0	1	0	0	0	0.015136
9926	2993.74	1	0	1	0	0	0	0.0151458
9928	2993.77	1	0	1	0	0	0	0.0151154
9930	2993.8	1	0	1	0	0	0	0.0151485
9932	2993.84	1	0	1	0	0	0	0.0151479
9934	2993.87	1	0	1	0	0	0	0.0151472
9936	2993.9	1	0	1	0	0	0	0.0151942
9938	2993.94	1	0	1	0	0	0	0.0151255
9940	2993.97	1	0	1	0	0	0	0.015114
9942	2994	1	0	1	0	0	0	0.0151123
9944	2994.04	1	0	1	0	0	0	0.015157
9946	2994.07	1	0	1	0	0	0	0.0151949
9948	2994.1	1	0	1	0	0	0	0.015224
9950	2994.14	1	0	1	0	0	0	0.0152017
9952	2994.17	1	0	1	0	0	0	0.0152034
9954	2994.2	1	0	1	0	0	0	0.0152487
9956	2994.24	1	0	1	0	0	0	0.0152599
9958	2994.27	1	0	1	0	0	0	0.0153181
9960	2994.3	1	0	1	0	0	0	0.0152656
9962	2994.34	1	0	1	0	0	0	0.0152589
9964	2994.37	1	0	1	0	0	0	0.0152602
9966	2994.4	1	0	1	0	0	0	0.0152193
9968	2994.44	1	0	1	0	0	0	0.0152166
9970	2994.47	1	0	1	0	0	0	0.015288
9972	2994.5	1	0	1	0	0	0	0.0153086
9974	2994.54	1	0	1	0	0	0	0.0152812
9976	2994.57	1	0	1	0	0	0	0.015249
9978	2994.6	1	0	1	0	0	0	0.0152328
9980	2994.64	1	0	1	0	0	0	0.0152118
9982	2994.67	1	0	1	0	0	0	0.0151868
9984	2994.7	1	0	1	0	0	0	0.0152162
9986	2994.74	1	0	1	0	0	0	0.0151729
9988	2994.77	1	0	1	0	0	0	0.0151915
9990	2994.8	1	0	1	0	0	0	0.0151786
9992	2994.84	1	0	1	0	0	0	0.0151705
9994	2994.87	1	0	1	0	0	0	0.0151658
9996	2994.9	1	0	1	0	0	0	0.0152369
9998	2994.94	1	0	1	0	0	0	0.0154795
10000	2994.97	1	0	1	0	0	0	0.0156453
10002	2995	1	0	1	0	0	0	0.0156612
10004	2995.04	1	0	1	0	0	0	0.0158348
10006	2995.07	1	0	1	0	0	0	0.0158199
10008	2995.1	1	0	1	0	0	0	0.0157249
10010	2995.14	1	0	1	0	0	0	0.0158047
10012	2995.17	1	0	1	0	0	0	0.0157692
10014	2995.2	1	0	1	0	0	0	0.0157279
10016	2995.24	1	0	1	0	0	0	0.0155688
10018	2995.27	1	0	1	0	0	0	0.0154978
10020	2995.3	1	0	1	0	0	0	0.0153939
10022	2995.34	1	0	1	0	0	0	0.0153062
10024	2995.37	1	0	1	0	0	0	0.0154054
10026	2995.4	1	0	1	0	0	0	0.0152724
10028	2995.44	1	0	1	0	0	0	0.0151983
10030	2995.47	1	0	1	0	0	0	0.015245
10032	2995.5	1	0	1	0	0	0	0.0151793
10034	2995.54	1	0	1	0	0	0	0.015159
10036	2995.57	1	0	1	0	0	0	0.0152213
10038	2995.6	1	0	1	0	0	0	0.0151736
10040	2995.64	1	0	1	0	0	0	0.0153594
10042	2995.67	1	0	1	0	0	0	0.0153374
10044	2995.7	1	0	1	0	0	0	0.0154169
10046	2995.74	1	0	1	0	0	0	0.0152802
10048	2995.77	1	0	1	0	0	0	0.0151506
10050	2995.8	1	0	1	0	0	0	0.0151959
10052	2995.84	1	0	1	0	0	0	0.0151858
10054	2995.87	1	0	1	0	0	0	0.0150145
10056	2995.9	1	0	1	0	0	0	0.0148697
10058	2995.94	1	0	1	0	0	0	0.0149502
10060	2995.97	1	0	1	0	0	0	0.0149336
10062	2996	1	0	1	0	0	0	0.0149018
10064	2996.04	1	0	1	0	0	0	0.0149851
10066	2996.07	1	0	1	0	0	0	0.0149685
10068	2996.1	1	0	1	0	0	0	0.0148632
10070	2996.14	1	0	1	0	0	0	0.0151028
10072	2996.17	1	0	1	0	0	0	0.0149736
10074	2996.2	1	0	1	0	0	0	0.0148957
10076	2996.24	1	0	1	0	0	0	0.0149299
10078	2996.27	1	0	1	0	0	0	0.0149648
10080	2996.3	1	0	1	0	0	0	0.014892
10082	2996.34	1	0	1	0	0	0	0.0151171
10084	2996.37	1	0	1	0	0	0	0.0152873
10086	2996.4	1	0	1	0	0	0	0.0154612
10088	2996.44	1	0	1	0	0	0	0.015534
10090	2996.47	1	0	1	0	0	0	0.015538
10092	2996.5	1	0	1	0	0	0	0.0156687
10094	2996.54	1	0	1	0	0	0	0.0157073
10096	2996.57	1	0	1	0	0	0	0.0156886
10098	2996.6	1	0	1	0	0	0	0.0155743
10100	2996.64	1	0	1	0	0	0	0.0154812
10102	2996.67	1	0	1	0	0	0	0.0152859
10104	2996.7	1	0	1	0	0	0	0.0151834
10106	2996.74	1	0	1	0	0	0	0.0151973
10108	2996.77	1	0	1	0	0	0	0.0151915
10110	2996.8	1	0	1	0	0	0	0.0152189
10112	2996.84	1	0	1	0	0	0	0.0151533
10114	2996.87	1	0	1	0	0	0	0.0150825
10116	2996.9	1	0	1	0	0	0	0.0150903
10118	2996.94	1	0	1	0	0	0	0.015026
10120	2996.97	1	0	1	0	0	0	0.015071
10122	2997	1	0	1	0	0	0	0.0151979
10124	2997.04	1	0	1	0	0	0	0.0152423
10126	2997.07	1	0	1	0	0	0	0.015268
10128	2997.1	1	0	1	0	0	0	0.0154934
10130	2997.14	1	0	1	0	0	0	0.0154237
10132	2997.17	1	0	1	0	0	0	0.0155069
10134	2997.2	1	0	1	0	0	0	0.0153695
10136	2997.24	1	0	1	0	0	0	0.0152193
10138	2997.27	1	0	1	0	0	0	0.0152138
10140	2997.3	1	0	1	0	0	0	0.0151489
10142	2997.34	1	0	1	0	0	0	0.0152216
10144	2997.37	1	0	1	0	0	0	0.0150375
10146	2997.4	1	0	1	0	0	0	0.0149553
10148	2997.44	1	0	1	0	0	0	0.0151245
10150	2997.47	1	0	1	0	0	0	0.0153157
10152	2997.5	1	0	1	0	0	0	0.0153279
10154	2997.54	1	0	1	0	0	0	0.0154484
10156	2997.57	1	0	1	0	0	0	0.0155039
10158	2997.6	1	0	1	0	0	0	0.0155875
10160	2997.64	1	0	1	0	0	0	0.0158227
10162	2997.67	1	0	1	0	0	0	0.0159584
10164	2997.7	1	0	1	0	0	0	0.0158782
10166	2997.74	1	0	1	0	0	0	0.015758
10168	2997.77	1	0	1	0	0	0	0.0154788
10170	2997.8	1	0	1	0	0	0	0.0154751
10172	2997.84	1	0	1	0	0	0	0.0153357
10174	2997.87	1	0	1	0	0	0	0.0154145
10176	2997.9	1	0	1	0	0	0	0.0156169
10178	2997.94	1	0	1	0	0	0	0.0158406
10180	2997.97	1	0	1	0	0	0	0.0158748
10182	2998	1	0	1	0	0	0	0.0157225
10184	2998.04	1	0	1	0	0	0	0.0158091
10186	2998.07	1	0	1	0	0	0	0.0158507
10188	2998.1	1	0	1	0	0	0	0.0158575
10190	2998.14	1	0	1	0	0	0	0.0159191
10192	2998.17	1	0	1	0	0	0	0.0159553
10194	2998.2	1	0	1	0	0	0	0.0159421
10196	2998.24	1	0	1	0	0	0	0.0158433
10198	2998.27	1	0	1	0	0	0	0.0158694
10200	2998.3	1	0	1	0	0	0	0.0159567
10202	2998.34	1	0	1	0	0	0	0.0159875
10204	2998.37	1	0	1	0	0	0	0.0158423
10206	2998.4	1	0	1	0	0	0	0.0159929
10208	2998.44	1	0	1	0	0	0	0.0162359
10210	2998.47	1	0	1	0	0	0	0.0162145
10212	2998.5	1	0	1	0	0	0	0.0160653
10214	2998.54	1	0	1	0	0	0	0.015781
10216	2998.57	1	0	1	0	0	0	0.0158592
10218	2998.6	1	0	1	0	0	0	0.0160189
10220	2998.64	1	0	1	0	0	0	0.0160545
10222	2998.67	1	0	1	0	0	0	0.0158433
10224	2998.7	1	0	1	0	0	0	0.0159306
10226	2998.74	1	0	1	0	0	0	0.0159996
10228	2998.77	1	0	1	0	0	0	0.0159864
10230	2998.8	1	0	1	0	0	0	0.0159936
10232	2998.84	1	0	1	0	0	0	0.015981
10234	2998.87	1	0	1	0	0	0	0.0158443
10236	2998.9	1	0	1	0	0	0	0.0159597
10238	2998.94	1	0	1	0	0	0	0.0160288
10240	2998.97	1	0	1	0	0	0	0.0160975
10242	2999	1	0	1	0	0	0	0.0161401
10244	2999.04	1	0	1	0	0	0	0.0160504
10246	2999.07	1	0	1	0	0	0	0.0159567
10248	2999.1	1	0	1	0	0	0	0.0159756
10250	2999.14	1	0	1	0	0	0	0.0158521
10252	2999.17	1	0	1	0	0	0	0.0158697
10254	2999.2	1	0	1	0	0	0	0.0158081
10256	2999.24	1	0	1	0	0	0	0.0158643
10258	2999.27	1	0	1	0	0	0	0.0158331
10260	2999.3	1	0	1	0	0	0	0.0158108
10262	2999.34	1	0	1	0	0	0	0.0157712
10264	2999.37	1	0	1	0	0	0	0.0158528
10266	2999.4	1	0	1	0	0	0	0.0161756
10268	2999.44	1	0	1	0	0	0	0.0159604
10270	2999.47	1	0	1	0	0	0	0.0158585
10272	2999.5	1	0	1	0	0	0	0.0159685
10274	2999.54	1	0	1	0	0	0	0.0159919
10276	2999.57	1	0	1	0	0	0	0.0159113
10278	2999.6	1	0	1	0	0	0	0.0159854
10280	2999.64	1	0	1	0	0	0	0.0159929
10282	2999.67	1	0	1	0	0	0	0.0159831
10284	2999.7	1	0	1	0	0	0	0.0161672
10286	2999.74	1	0	1	0	0	0	0.0161925
10288	2999.77	1	0	1	0	0	0	0.0159276
10290	2999.8	1	0	1	0	0	0	0.0158331
10292	2999.84	1	0	1	0	0	0	0.0158937
10294	2999.87	1	0	1	0	0	0	0.015998
10296	2999.9	1	0	1	0	0	0	0.0158731
10298	2999.94	1	0	1	0	0	0	0.0158758
10300	2999.97	1	0	1	0	0	0	0.015956
10302	3000	1	0	1	0	0	0	0.0161587
10304	3000.04	1	0	1	0	0	0	0.0160054
10306	3000.07	1	0	1	0	0	0	0.0159211
10308	3000.1	1	0	1	0	0	0	0.0160044
10310	3000.14	1	0	1	0	0	0	0.0159932
10312	3000.17	1	0	1	0	0	0	0.0159299
10314	3000.2	1	0	1	0	0	0	0.0159902
10316	3000.24	1	0	1	0	0	0	0.0159529
10318	3000.27	1	0	1	0	0	0	0.0160013
10320	3000.3	1	0	1	0	0	0	0.0162568
10322	3000.34	1	0	1	0	0	0	0.0161357
10324	3000.37	1	0	1	0	0	0	0.0160081
10326	3000.4	1	0	1	0	0	0	0.0159408
10328	3000.44	1	0	1	0	0	0	0.0160755
10330	3000.47	1	0	1	0	0	0	0.0158721
10332	3000.5	1	0	1	0	0	0	0.0159604
10334	3000.53	1	0	1	0	0	0	0.0159678
10336	3000.57	1	0	1	0	0	0	0.0159617
10338	3000.6	1	0	1	0	0	0	0.0158853
10340	3000.63	1	0	1	0	0	0	0.0158176
10342	3000.67	1	0	1	0	0	0	0.0156074
10344	3000.7	1	0	1	0	0	0	0.0154765
10346	3000.73	1	0	1	0	0	0	0.0154585
10348	3000.77	1	0	1	0	0	0	0.0153617
10350	3000.8	1	0	1	0	0	0	0.0154453
10352	3000.83	1	0	1	0	0	0	0.015515
10354	3000.87	1	0	1	0	0	0	0.0153546
10356	3000.9	1	0	1	0	0	0	0.0155648
10358	3000.93	1	0	1	0	0	0	0.0154132
10360	3000.97	1	0	1	0	0	0	0.0154802
10362	3001	1	0	1	0	0	0	0.015603
10364	3001.03	1	0	1	0	0	0	0.0155248
10366	3001.07	1	0	1	0	0	0	0.0155746
10368	3001.1	1	0	1	0	0	0	0.0155089
10370	3001.13	1	0	1	0	0	0	0.0157242
10372	3001.17	1	0	1	0	0	0	0.0163435
10374	3001.2	1	0	1	0	0	0	0.0161012
10376	3001.23	1	0	1	0	0	0	0.0162856
10378	3001.27	1	0	1	0	0	0	0.0163621
10380	3001.3	1	0	1	0	0	0	0.0160034
10382	3001.33	1	0	1	0	0	0	0.0162799
10384	3001.37	1	0	1	0	0	0	0.0163587
10386	3001.4	1	0	1	0	0	0	0.0159956
10388	3001.43	1	0	1	0	0	0	0.0162545
10390	3001.47	1	0	1	0	0	0	0.0162325
10392	3001.5	1	0	1	0	0	0	0.0159282
10394	3001.53	1	0	1	0	0	0	0.0158494
10396	3001.57	1	0	1	0	0	0	0.0161793
10398	3001.6	1	0	1	0	0	0	0.0161364
10400	3001.63	1	0	1	0	0	0	0.0159079
10402	3001.67	1	0	1	0	0	0	0.0158562
10404	3001.7	1	0	1	0	0	0	0.0158798
10406	3001.73	1	0	1	0	0	0	0.0158876
10408	3001.77	1	0	1	0	0	0	0.0158562
10410	3001.8	1	0	1	0	0	0	0.0158335
10412	3001.83	1	0	1	0	0	0	0.015936
10414	3001.87	1	0	1	0	0	0	0.0159854
10416	3001.9	1	0	1	0	0	0	0.0161117
10418	3001.93	1	0	1	0	0	0	0.0160521
10420	3001.97	1	0	1	0	0	0	0.0158985
10422	3002	1	0	1	0	0	0	0.0158778
10424	3002.03	1	0	1	0	0	0	0.0158321
10426	3002.07	1	0	1	0	0	0	0.016022
10428	3002.1	1	0	1	0	0	0	0.0161191
10430	3002.13	1	0	1	0	0	0	0.0158961
10432	3002.17	1	0	1	0	0	0	0.0161865
10434	3002.2	1	0	1	0	0	0	0.0159726
10436	3002.23	1	0	1	0	0	0	0.0159015
10438	3002.27	1	0	1	0	0	0	0.0158328
10440	3002.3	1	0	1	0	0	0	0.0160826
10442	3002.33	1	0	1	0	0	0	0.0161201
10444	3002.37	1	0	1	0	0	0	0.0162298
10446	3002.4	1	0	1	0	0	0	0.0161905
10448	3002.43	1	0	1	0	0	0	0.0160714
10450	3002.47	1	0	1	0	0	0	0.0162799
10452	3002.5	1	0	1	0	0	0	0.0162504
10454	3002.53	1	0	1	0	0	0	0.0163211
10456	3002.57	1	0	1	0	0	0	0.0163191
10458	3002.6	1	0	1	0	0	0	0.0161147
10460	3002.63	1	0	1	0	0	0	0.0161435
10462	3002.67	1	0	1	0	0	0	0.0162589
10464	3002.7	1	0	1	0	0	0	0.0162115
10466	3002.73	1	0	1	0	0	0	0.0163205
10468	3002.77	1	0	1	0	0	0	0.0162091
10470	3002.8	1	0	1	0	0	0	0.0163604
10472	3002.83	1	0	1	0	0	0	0.016312
10474	3002.87	1	0	1	0	0	0	0.016155
10476	3002.9	1	0	1	0	0	0	0.0161949
10478	3002.93	1	0	1	0	0	0	0.0161963
10480	3002.97	1	0	1	0	0	0	0.0161709
10482	3003	1	0	1	0	0	0	0.0160626
10484	3003.03	1	0	1	0	0	0	0.0161154
10486	3003.07	1	0	1	0	0	0	0.0157628
10488	3003.1	1	0	1	0	0	0	0.0155668
10490	3003.13	1	0	1	0	0	0	0.0157249
10492	3003.17	1	0	1	0	0	0	0.0156325
10494	3003.2	1	0	1	0	0	0	0.015733
10496	3003.23	1	0	1	0	0	0	0.0156795
10498	3003.27	1	0	1	0	0	0	0.0157022
10500	3003.3	1	0	1	0	0	0	0.0156677
10502	3003.33	1	0	1	0	0	0	0.0157337
10504	3003.37	1	0	1	0	0	0	0.0158795
10506	3003.4	1	0	1	0	0	0	0.0160382
10508	3003.43	1	0	1	0	0	0	0.0159384
10510	3003.47	1	0	1	0	0	0	0.0159814
10512	3003.5	1	0	1	0	0	0	0.0161238
10514	3003.53	1	0	1	0	0	0	0.0162656
10516	3003.57	1	0	1	0	0	0	0.0161381
10518	3003.6	1	0	1	0	0	0	0.0160247
10520	3003.63	1	0	1	0	0	0	0.0160981
10522	3003.67	1	0	1	0	0	0	0.0159215
10524	3003.7	1	0	1	0	0	0	0.0157546
10526	3003.73	1	0	1	0	0	0	0.015693
10528	3003.77	1	0	1	0	0	0	0.0157631
10530	3003.8	1	0	1	0	0	0	0.0158744
10532	3003.83	1	0	1	0	0	0	0.0157732
10534	3003.87	1	0	1	0	0	0	0.015826
10536	3003.9	1	0	1	0	0	0	0.0157364
10538	3003.93	1	0	1	0	0	0	0.0156247
10540	3003.97	1	0	1	0	0	0	0.0156677
10542	3004	1	0	1	0	0	0	0.015582
10544	3004.03	1	0	1	0	0	0	0.0153506
10546	3004.07	1	0	1	0	0	0	0.0156402
10548	3004.1	1	0	1	0	0	0	0.0157861
10550	3004.13	1	0	1	0	0	0	0.0158128
10552	3004.17	1	0	1	0	0	0	0.0157259
10554	3004.2	1	0	1	0	0	0	0.0159347
10556	3004.23	1	0	1	0	0	0	0.0158504
10558	3004.27	1	0	1	0	0	0	0.0158112
10560	3004.3	1	0	1	0	0	0	0.0158037
10562	3004.33	1	0	1	0	0	0	0.0157841
10564	3004.37	1	0	1	0	0	0	0.0157614
10566	3004.4	1	0	1	0	0	0	0.0156721
10568	3004.43	1	0	1	0	0	0	0.0157682
10570	3004.47	1	0	1	0	0	0	0.0158162
10572	3004.5	1	0	1	0	0	0	0.015691
10574	3004.53	1	0	1	0	0	0	0.0156903
10576	3004.57	1	0	1	0	0	0	0.0156934
10578	3004.6	1	0	1	0	0	0	0.0156724
10580	3004.63	1	0	1	0	0	0	0.0157079
10582	3004.67	1	0	1	0	0	0	0.0154927
10584	3004.7	1	0	1	0	0	0	0.0155529
10586	3004.73	1	0	1	0	0	0	0.0155489
10588	3004.77	1	0	1	0	0	0	0.0154981
10590	3004.8	1	0	1	0	0	0	0.0152649
10592	3004.83	1	0	1	0	0	0	0.0151979
10594	3004.87	1	0	1	0	0	0	0.0151052
10596	3004.9	1	0	1	0	0	0	0.0148585
10598	3004.93	1	0	1	0	0	0	0.0150741
10600	3004.97	1	0	1	0	0	0	0.0154507
10602	3005	1	0	1	0	0	0	0.0153732
10604	3005.03	1	0	1	0	0	0	0.0153868
10606	3005.07	1	0	1	0	0	0	0.0156254
10608	3005.1	1	0	1	0	0	0	0.0156646
10610	3005.13	1	0	1	0	0	0	0.0158778
10612	3005.17	1	0	1	0	0	0	0.0159353
10614	3005.2	1	0	1	0	0	0	0.0159685
10616	3005.23	1	0	1	0	0	0	0.0159567
10618	3005.27	1	0	1	0	0	0	0.0155915
10620	3005.3	1	0	1	0	0	0	0.0156606
10622	3005.33	1	0	1	0	0	0	0.0157804
10624	3005.37	1	0	1	0	0	0	0.0158971
10626	3005.4	1	0	1	0	0	0	0.0159523
10628	3005.43	1	0	1	0	0	0	0.0159523
10630	3005.47	1	0	1	0	0	0	0.0159746
10632	3005.5	1	0	1	0	0	0	0.0158518
10634	3005.53	1	0	1	0	0	0	0.0157563
10636	3005.57	1	0	1	0	0	0	0.0158034
10638	3005.6	1	0	1	0	0	0	0.0157773
10640	3005.63	1	0	1	0	0	0	0.0157029
10642	3005.67	1	0	1	0	0	0	0.0156237
10644	3005.7	1	0	1	0	0	0	0.0156013
10646	3005.73	1	0	1	0	0	0	0.0156199
10648	3005.77	1	0	1	0	0	0	0.0155191
10650	3005.8	1	0	1	0	0	0	0.0155797
10652	3005.83	1	0	1	0	0	0	0.0156051
10654	3005.87	1	0	1	0	0	0	0.0156118
10656	3005.9	1	0	1	0	0	0	0.0156166
10658	3005.93	1	0	1	0	0	0	0.0155929
10660	3005.97	1	0	1	0	0	0	0.0156172
10662	3006	1	0	1	0	0	0	0.0156514
10664	3006.03	1	0	1	0	0	0	0.0157475
10666	3006.07	1	0	1	0	0	0	0.0156169
10668	3006.1	1	0	1	0	0	0	0.0155824
10670	3006.13	1	0	1	0	0	0	0.0156179
10672	3006.17	1	0	1	0	0	0	0.0155492
10674	3006.2	1	0	1	0	0	0	0.0155377
10676	3006.23	1	0	1	0	0	0	0.0154589
10678	3006.27	1	0	1	0	0	0	0.0155441
10680	3006.3	1	0	1	0	0	0	0.0154805
10682	3006.33	1	0	1	0	0	0	0.0155073
10684	3006.37	1	0	1	0	0	0	0.0154883
10686	3006.4	1	0	1	0	0	0	0.0155164
10688	3006.43	1	0	1	0	0	0	0.0153475
10690	3006.47	1	0	1	0	0	0	0.0153116
10692	3006.5	1	0	1	0	0	0	0.0154626
10694	3006.53	1	0	1	0	0	0	0.0154169
10696	3006.57	1	0	1	0	0	0	0.0154294
10698	3006.6	1	0	1	0	0	0	0.0152538
10700	3006.63	1	0	1	0	0	0	0.0152166
10702	3006.67	1	0	1	0	0	0	0.0153482
10704	3006.7	1	0	1	0	0	0	0.0153154
10706	3006.73	1	0	1	0	0	0	0.0153516
10708	3006.77	1	0	1	0	0	0	0.0151309
10710	3006.8	1	0	1	0	0	0	0.0151895
10712	3006.83	1	0	1	0	0	0	0.0154592
10714	3006.87	1	0	1	0	0	0	0.0155834
10716	3006.9	1	0	1	0	0	0	0.015422
10718	3006.93	1	0	1	0	0	0	0.0154856
10720	3006.97	1	0	1	0	0	0	0.0154382
10722	3007	1	0	1	0	0	0	0.0156863
10724	3007.03	1	0	1	0	0	0	0.0158511
10726	3007.07	1	0	1	0	0	0	0.0159384
10728	3007.1	1	0	1	0	0	0	0.0158467
10730	3007.13	1	0	1	0	0	0	0.0159316
10732	3007.17	1	0	1	0	0	0	0.0159905
10734	3007.2	1	0	1	0	0	0	0.0160968
10736	3007.23	1	0	1	0	0	0	0.0162172
10738	3007.27	1	0	1	0	0	0	0.0160474
10740	3007.3	1	0	1	0	0	0	0.0160318
10742	3007.33	1	0	1	0	0	0	0.015778
10744	3007.37	1	0	1	0	0	0	0.0154866
10746	3007.4	1	0	1	0	0	0	0.015648
10748	3007.43	1	0	1	0	0	0	0.0158145
10750	3007.47	1	0	1	0	0	0	0.0159218
10752	3007.5	1	0	1	0	0	0	0.0157688
10754	3007.53	1	0	1	0	0	0	0.0157323
10756	3007.57	1	0	1	0	0	0	0.0156257
10758	3007.6	1	0	1	0	0	0	0.0155556
10760	3007.63	1	0	1	0	0	0	0.0156267
10762	3007.67	1	0	1	0	0	0	0.015492
10764	3007.7	1	0	1	0	0	0	0.0154196
10766	3007.73	1	0	1	0	0	0	0.0154636
10768	3007.77	1	0	1	0	0	0	0.015803
10770	3007.8	1	0	1	0	0	0	0.0158061
10772	3007.83	1	0	1	0	0	0	0.0158457
10774	3007.87	1	0	1	0	0	0	0.0158839
10776	3007.9	1	0	1	0	0	0	0.0158866
10778	3007.93	1	0	1	0	0	0	0.0158264
10780	3007.97	1	0	1	0	0	0	0.0157577
10782	3008	1	0	1	0	0	0	0.0155729
10784	3008.03	1	0	1	0	0	0	0.0154098
10786	3008.07	1	0	1	0	0	0	0.0154805
10788	3008.1	1	0	1	0	0	0	0.0155279
10790	3008.13	1	0	1	0	0	0	0.0154484
10792	3008.17	1	0	1	0	0	0	0.0154216
10794	3008.2	1	0	1	0	0	0	0.0153482
10796	3008.23	1	0	1	0	0	0	0.015492
10798	3008.27	1	0	1	0	0	0	0.0155651
10800	3008.3	1	0	1	0	0	0	0.015602
10802	3008.33	1	0	1	0	0	0	0.015599
10804	3008.37	1	0	1	0	0	0	0.0154961
10806	3008.4	1	0	1	0	0	0	0.0156754
10808	3008.43	1	0	1	0	0	0	0.0156528
10810	3008.47	1	0	1	0	0	0	0.015755
10812	3008.5	1	0	1	0	0	0	0.0157469
10814	3008.53	1	0	1	0	0	0	0.0155776
10816	3008.57	1	0	1	0	0	0	0.0155946
10818	3008.6	1	0	1	0	0	0	0.0157089
10820	3008.63	1	0	1	0	0	0	0.0158467
10822	3008.67	1	0	1	0	0	0	0.0158677
10824	3008.7	1	0	1	0	0	0	0.0159719
10826	3008.73	1	0	1	0	0	0	0.0157066
10828	3008.77	1	0	1	0	0	0	0.0156822
10830	3008.8	1	0	1	0	0	0	0.0156991
10832	3008.83	1	0	1	0	0	0	0.0157577
10834	3008.87	1	0	1	0	0	0	0.016025
10836	3008.9	1	0	1	0	0	0	0.0161079
10838	3008.93	1	0	1	0	0	0	0.0161634
10840	3008.97	1	0	1	0	0	0	0.0162044
10842	3009	1	0	1	0	0	0	0.0162474
10844	3009.03	1	0	1	0	0	0	0.0162237
10846	3009.07	1	0	1	0	0	0	0.0160027
10848	3009.1	1	0	1	0	0	0	0.0159485
10850	3009.13	1	0	1	0	0	0	0.0158555
10852	3009.17	1	0	1	0	0	0	0.0158575
10854	3009.2	1	0	1	0	0	0	0.0158233
10856	3009.23	1	0	1	0	0	0	0.0156392
10858	3009.27	1	0	1	0	0	0	0.0153773
10860	3009.3	1	0	1	0	0	0	0.0157309
10862	3009.33	1	0	1	0	0	0	0.0157313
10864	3009.37	1	0	1	0	0	0	0.0157005
10866	3009.4	1	0	1	0	0	0	0.0157042
10868	3009.43	1	0	1	0	0	0	0.0159617
10870	3009.47	1	0	1	0	0	0	0.0157079
10872	3009.5	1	0	1	0	0	0	0.0158274
10874	3009.53	1	0	1	0	0	0	0.0158859
10876	3009.57	1	0	1	0	0	0	0.0158612
10878	3009.6	1	0	1	0	0	0	0.016003
10880	3009.63	1	0	1	0	0	0	0.0160968
10882	3009.67	1	0	1	0	0	0	0.0161354
10884	3009.7	1	0	1	0	0	0	0.0159513
10886	3009.73	1	0	1	0	0	0	0.0160156
10888	3009.77	1	0	1	0	0	0	0.015978
10890	3009.8	1	0	1	0	0	0	0.0157776
10892	3009.83	1	0	1	0	0	0	0.0157049
10894	3009.87	1	0	1	0	0	0	0.0157208
10896	3009.9	1	0	1	0	0	0	0.0158159
10898	3009.93	1	0	1	0	0	0	0.0159563
10900	3009.97	1	0	1	0	0	0	0.0160382
10902	3010	1	0	1	0	0	0	0.0161976
10904	3010.03	1	0	1	0	0	0	0.0161377
10906	3010.07	1	0	1	0	0	0	0.0160108
10908	3010.1	1	0	1	0	0	0	0.0158612
10910	3010.13	1	0	1	0	0	0	0.0158829
10912	3010.17	1	0	1	0	0	0	0.0162443
10914	3010.2	1	0	1	0	0	0	0.016091
10916	3010.23	1	0	1	0	0	0	0.0158511
10918	3010.27	1	0	1	0	0	0	0.0158961
10920	3010.3	1	0	1	0	0	0	0.015892
10922	3010.33	1	0	1	0	0	0	0.0158325
10924	3010.37	1	0	1	0	0	0	0.0159441
10926	3010.4	1	0	1	0	0	0	0.0158836
10928	3010.43	1	0	1	0	0	0	0.0158812
10930	3010.47	1	0	1	0	0	0	0.0157841
10932	3010.5	1	0	1	0	0	0	0.0158034
10934	3010.53	1	0	1	0	0	0	0.0158389
10936	3010.57	1	0	1	0	0	0	0.0157746
10938	3010.6	1	0	1	0	0	0	0.0160233
10940	3010.63	1	0	1	0	0	0	0.0159337
10942	3010.67	1	0	1	0	0	0	0.0158372
10944	3010.7	1	0	1	0	0	0	0.0158927
10946	3010.73	1	0	1	0	0	0	0.015892
10948	3010.77	1	0	1	0	0	0	0.0159766
10950	3010.8	1	0	1	0	0	0	0.0159458
10952	3010.83	1	0	1	0	0	0	0.0156626
10954	3010.87	1	0	1	0	0	0	0.015556
10956	3010.9	1	0	1	0	0	0	0.0154037
10958	3010.93	1	0	1	0	0	0	0.0153485
10960	3010.97	1	0	1	0	0	0	0.0152744
10962	3011	1	0	1	0	0	0	0.0154683
10964	3011.03	1	0	1	0	0	0	0.0154724
10966	3011.07	1	0	1	0	0	0	0.0155516
10968	3011.1	1	0	1	0	0	0	0.015534
10970	3011.13	1	0	1	0	0	0	0.0156555
10972	3011.17	1	0	1	0	0	0	0.015312
10974	3011.2	1	0	1	0	0	0	0.0152751
10976	3011.23	1	0	1	0	0	0	0.0155864
10978	3011.27	1	0	1	0	0	0	0.0156883
10980	3011.3	1	0	1	0	0	0	0.0156819
10982	3011.33	1	0	1	0	0	0	0.0156578
10984	3011.37	1	0	1	0	0	0	0.0157171
10986	3011.4	1	0	1	0	0	0	0.0156738
10988	3011.43	1	0	1	0	0	0	0.0156981
10990	3011.47	1	0	1	0	0	0	0.0157878
10992	3011.5	1	0	1	0	0	0	0.0155516
10994	3011.53	1	0	1	0	0	0	0.015381
10996	3011.57	1	0	1	0	0	0	0.0155871
10998	3011.6	1	0	1	0	0	0	0.0157215
11000	3011.63	1	0	1	0	0	0	0.0157232
11002	3011.67	1	0	1	0	0	0	0.0156389
11004	3011.7	1	0	1	0	0	0	0.0156974
11006	3011.73	1	0	1	0	0	0	0.015579
11008	3011.77	1	0	1	0	0	0	0.0157235
11010	3011.8	1	0	1	0	0	0	0.0155902
11012	3011.83	1	0	1	0	0	0	0.0154995
11014	3011.87	1	0	1	0	0	0	0.015581
11016	3011.9	1	0	1	0	0	0	0.0155245
11018	3011.93	1	0	1	0	0	0	0.0155177
11020	3011.97	1	0	1	0	0	0	0.0156216
11022	3012	1	0	1	0	0	0	0.0157841
11024	3012.03	1	0	1	0	0	0	0.0157221
11026	3012.07	1	0	1	0	0	0	0.0156518
11028	3012.1	1	0	1	0	0	0	0.0156809
11030	3012.13	1	0	1	0	0	0	0.0157492
11032	3012.17	1	0	1	0	0	0	0.0157597
11034	3012.2	1	0	1	0	0	0	0.015446
11036	3012.23	1	0	1	0	0	0	0.0154727
11038	3012.27	1	0	1	0	0	0	0.0156186
11040	3012.3	1	0	1	0	0	0	0.0157492
11042	3012.33	1	0	1	0	0	0	0.0158105
11044	3012.37	1	0	1	0	0	0	0.015537
11046	3012.4	1	0	1	0	0	0	0.0155411
11048	3012.43	1	0	1	0	0	0	0.0156514
11050	3012.47	1	0	1	0	0	0	0.0157492
11052	3012.5	1	0	1	0	0	0	0.0157337
11054	3012.53	1	0	1	0	0	0	0.0155455
11056	3012.57	1	0	1	0	0	0	0.0153072
11058	3012.6	1	0	1	0	0	0	0.0154037
11060	3012.63	1	0	1	0	0	0	0.0155584
11062	3012.67	1	0	1	0	0	0	0.0156646
11064	3012.7	1	0	1	0	0	0	0.0156
11066	3012.73	1	0	1	0	0	0	0.0151634
11068	3012.77	1	0	1	0	0	0	0.0150991
11070	3012.8	1	0	1	0	0	0	0.0154233
11072	3012.83	1	0	1	0	0	0	0.0155648
11074	3012.87	1	0	1	0	0	0	0.015604
11076	3012.9	1	0	1	0	0	0	0.0156237
11078	3012.93	1	0	1	0	0	0	0.0155479
11080	3012.97	1	0	1	0	0	0	0.0155665
11082	3013	1	0	1	0	0	0	0.0157235
11084	3013.03	1	0	1	0	0	0	0.0156836
11086	3013.07	1	0	1	0	0	0	0.0155597
11088	3013.1	1	0	1	0	0	0	0.0157705
11090	3013.13	1	0	1	0	0	0	0.0156893
11092	3013.17	1	0	1	0	0	0	0.0156199
11094	3013.2	1	0	1	0	0	0	0.0157726
11096	3013.23	1	0	1	0	0	0	0.0157685
11098	3013.27	1	0	1	0	0	0	0.0155445
11100	3013.3	1	0	1	0	0	0	0.0156088
11102	3013.33	1	0	1	0	0	0	0.0156304
11104	3013.37	1	0	1	0	0	0	0.0156345
11106	3013.4	1	0	1	0	0	0	0.0154924
11108	3013.43	1	0	1	0	0	0	0.0154386
11110	3013.47	1	0	1	0	0	0	0.0154974
11112	3013.5	1	0	1	0	0	0	0.0152538
11114	3013.53	1	0	1	0	0	0	0.0152135
[truncated: 34,161 more rows]

## Sheet: Mouse 1_470 Signal
FrameCounter	Timestamp	LedState	Stimulation	Output0	Output1	Input0	Input1	Region0G
7119	2946.95	2	0	1	0	0	0	0.0332129
7121	2946.99	2	0	1	0	0	0	0.0333374
7123	2947.02	2	0	1	0	0	0	0.0334717
7125	2947.05	2	0	1	0	0	0	0.033267
7127	2947.09	2	0	1	0	0	0	0.0329164
7129	2947.12	2	0	1	0	0	0	0.0332853
7131	2947.15	2	0	1	0	0	0	0.0332003
7133	2947.19	2	0	1	0	0	0	0.0335289
7135	2947.22	2	0	1	0	0	0	0.0333926
7137	2947.25	2	0	1	0	0	0	0.0331601
7139	2947.29	2	0	1	0	0	0	0.0334105
7141	2947.32	2	0	1	0	0	0	0.0330223
7143	2947.35	2	0	1	0	0	0	0.0333012
7145	2947.39	2	0	1	0	0	0	0.0331621
7147	2947.42	2	0	1	0	0	0	0.0332643
7149	2947.45	2	0	1	0	0	0	0.0333157
7151	2947.49	2	0	1	0	0	0	0.0333039
7153	2947.52	2	0	1	0	0	0	0.0334068
7155	2947.55	2	0	1	0	0	0	0.0328348
7157	2947.59	2	0	1	0	0	0	0.0325976
7159	2947.62	2	0	1	0	0	0	0.0328582
7161	2947.65	2	0	1	0	0	0	0.0328051
7163	2947.69	2	0	1	0	0	0	0.0330829
7165	2947.72	2	0	1	0	0	0	0.0329817
7167	2947.75	2	0	1	0	0	0	0.0331154
7169	2947.79	2	0	1	0	0	0	0.0329909
7171	2947.82	2	0	1	0	0	0	0.0333063
7173	2947.85	2	0	1	0	0	0	0.0332464
7175	2947.89	2	0	1	0	0	0	0.033135
7177	2947.92	2	0	1	0	0	0	0.0329506
7179	2947.95	2	0	1	0	0	0	0.0329712
7181	2947.99	2	0	1	0	0	0	0.0328727
7183	2948.02	2	0	1	0	0	0	0.0325106
7185	2948.05	2	0	1	0	0	0	0.0324487
7187	2948.09	2	0	1	0	0	0	0.0327469
7189	2948.12	2	0	1	0	0	0	0.0325705
7191	2948.15	2	0	1	0	0	0	0.0326392
7193	2948.19	2	0	1	0	0	0	0.0324859
7195	2948.22	2	0	1	0	0	0	0.0327519
7197	2948.25	2	0	1	0	0	0	0.0327499
7199	2948.29	2	0	1	0	0	0	0.0330548
7201	2948.32	2	0	1	0	0	0	0.0329699
7203	2948.35	2	0	1	0	0	0	0.032844
7205	2948.39	2	0	1	0	0	0	0.0329706
7207	2948.42	2	0	1	0	0	0	0.0329056
7209	2948.45	2	0	1	0	0	0	0.0331266
7211	2948.49	2	0	1	0	0	0	0.0329343
7213	2948.52	2	0	1	0	0	0	0.0327956
7215	2948.55	2	0	1	0	0	0	0.0326057
7217	2948.59	2	0	1	0	0	0	0.0324687
7219	2948.62	2	0	1	0	0	0	0.0327827
7221	2948.65	2	0	1	0	0	0	0.0326403
7223	2948.69	2	0	1	0	0	0	0.0327814
7225	2948.72	2	0	1	0	0	0	0.032466
7227	2948.75	2	0	1	0	0	0	0.0325289
7229	2948.79	2	0	1	0	0	0	0.0327604
7231	2948.82	2	0	1	0	0	0	0.0327492
7233	2948.85	2	0	1	0	0	0	0.0326223
7235	2948.89	2	0	1	0	0	0	0.0325272
7237	2948.92	2	0	1	0	0	0	0.0327932
7239	2948.95	2	0	1	0	0	0	0.032603
7241	2948.99	2	0	1	0	0	0	0.0326267
7243	2949.02	2	0	1	0	0	0	0.0326507
7245	2949.05	2	0	1	0	0	0	0.0324118
7247	2949.09	2	0	1	0	0	0	0.0326288
7249	2949.12	2	0	1	0	0	0	0.0323147
7251	2949.15	2	0	1	0	0	0	0.0326744
7253	2949.19	2	0	1	0	0	0	0.0324531
7255	2949.22	2	0	1	0	0	0	0.0322585
7257	2949.25	2	0	1	0	0	0	0.0323096
7259	2949.29	2	0	1	0	0	0	0.0319604
7261	2949.32	2	0	1	0	0	0	0.0322355
7263	2949.35	2	0	1	0	0	0	0.0319621
7265	2949.39	2	0	1	0	0	0	0.0322402
7267	2949.42	2	0	1	0	0	0	0.0320589
7269	2949.45	2	0	1	0	0	0	0.0320568
7271	2949.49	2	0	1	0	0	0	0.0323719
7273	2949.52	2	0	1	0	0	0	0.0319709
7275	2949.55	2	0	1	0	0	0	0.0322518
7277	2949.59	2	0	1	0	0	0	0.0320582
7279	2949.62	2	0	1	0	0	0	0.0320443
7281	2949.65	2	0	1	0	0	0	0.0323638
7283	2949.69	2	0	1	0	0	0	0.0320166
7285	2949.72	2	0	1	0	0	0	0.0323546
7287	2949.75	2	0	1	0	0	0	0.0321441
7289	2949.79	2	0	1	0	0	0	0.0323604
7291	2949.82	2	0	1	0	0	0	0.0322352
7293	2949.85	2	0	1	0	0	0	0.0320866
7295	2949.89	2	0	1	0	0	0	0.032403
7297	2949.92	2	0	1	0	0	0	0.0320277
7299	2949.95	2	0	1	0	0	0	0.0323763
7301	2949.99	2	0	1	0	0	0	0.0321766
7303	2950.02	2	0	1	0	0	0	0.0322057
7305	2950.05	2	0	1	0	0	0	0.0324609
7307	2950.09	2	0	1	0	0	0	0.0321323
7309	2950.12	2	0	1	0	0	0	0.032424
7311	2950.15	2	0	1	0	0	0	0.0319326
7313	2950.19	2	0	1	0	0	0	0.0318954
7315	2950.22	2	0	1	0	0	0	0.0320362
7317	2950.25	2	0	1	0	0	0	0.0320416
7319	2950.29	2	0	1	0	0	0	0.0321316
7321	2950.32	2	0	1	0	0	0	0.0319556
7323	2950.35	2	0	1	0	0	0	0.0322646
7325	2950.39	2	0	1	0	0	0	0.0320057
7327	2950.42	2	0	1	0	0	0	0.0322846
7329	2950.45	2	0	1	0	0	0	0.0321245
7331	2950.49	2	0	1	0	0	0	0.0319611
7333	2950.52	2	0	1	0	0	0	0.0316629
7335	2950.55	2	0	1	0	0	0	0.0317675
7337	2950.59	2	0	1	0	0	0	0.0318545
7339	2950.62	2	0	1	0	0	0	0.0321658
7341	2950.65	2	0	1	0	0	0	0.0321394
7343	2950.69	2	0	1	0	0	0	0.0322754
7345	2950.72	2	0	1	0	0	0	0.0324883
7347	2950.75	2	0	1	0	0	0	0.0326095
7349	2950.79	2	0	1	0	0	0	0.0322074
7351	2950.82	2	0	1	0	0	0	0.0323614
7353	2950.85	2	0	1	0	0	0	0.0326775
7355	2950.89	2	0	1	0	0	0	0.0327773
7357	2950.92	2	0	1	0	0	0	0.0323364
7359	2950.95	2	0	1	0	0	0	0.0323969
7361	2950.99	2	0	1	0	0	0	0.0323773
7363	2951.02	2	0	1	0	0	0	0.0322037
7365	2951.05	2	0	1	0	0	0	0.0320954
7367	2951.09	2	0	1	0	0	0	0.0325783
7369	2951.12	2	0	1	0	0	0	0.0323634
7371	2951.15	2	0	1	0	0	0	0.0325181
7373	2951.19	2	0	1	0	0	0	0.0319556
7375	2951.22	2	0	1	0	0	0	0.0322768
7377	2951.25	2	0	1	0	0	0	0.0323756
7379	2951.29	2	0	1	0	0	0	0.0322118
7381	2951.32	2	0	1	0	0	0	0.0321949
7383	2951.35	2	0	1	0	0	0	0.0319946
7385	2951.39	2	0	1	0	0	0	0.032421
7387	2951.42	2	0	1	0	0	0	0.0321837
7389	2951.45	2	0	1	0	0	0	0.03231
7391	2951.49	2	0	1	0	0	0	0.0322876
7393	2951.52	2	0	1	0	0	0	0.0322917
7395	2951.55	2	0	1	0	0	0	0.0323455
7397	2951.59	2	0	1	0	0	0	0.0319935
7399	2951.62	2	0	1	0	0	0	0.0320443
7401	2951.65	2	0	1	0	0	0	0.0317587
7403	2951.69	2	0	1	0	0	0	0.0318392
7405	2951.72	2	0	1	0	0	0	0.0318856
7407	2951.75	2	0	1	0	0	0	0.0317326
7409	2951.79	2	0	1	0	0	0	0.0317269
7411	2951.82	2	0	1	0	0	0	0.031491
7413	2951.85	2	0	1	0	0	0	0.0317221
7415	2951.89	2	0	1	0	0	0	0.0316785
7417	2951.92	2	0	1	0	0	0	0.0316951
7419	2951.95	2	0	1	0	0	0	0.0318629
7421	2951.99	2	0	1	0	0	0	0.0313039
7423	2952.02	2	0	1	0	0	0	0.0314893
7425	2952.05	2	0	1	0	0	0	0.0305874
7427	2952.09	2	0	1	0	0	0	0.0307147
7429	2952.12	2	0	1	0	0	0	0.0311231
7431	2952.15	2	0	1	0	0	0	0.031004
7433	2952.19	2	0	1	0	0	0	0.0314578
7435	2952.22	2	0	1	0	0	0	0.031359
7437	2952.25	2	0	1	0	0	0	0.0315932
7439	2952.29	2	0	1	0	0	0	0.0312734
7441	2952.32	2	0	1	0	0	0	0.0312148
7443	2952.35	2	0	1	0	0	0	0.0314179
7445	2952.39	2	0	1	0	0	0	0.0312247
7447	2952.42	2	0	1	0	0	0	0.0311005
7449	2952.45	2	0	1	0	0	0	0.0307634
7451	2952.49	2	0	1	0	0	0	0.0313945
7453	2952.52	2	0	1	0	0	0	0.031777
7455	2952.55	2	0	1	0	0	0	0.0327015
7457	2952.59	2	0	1	0	0	0	0.0332453
7459	2952.62	2	0	1	0	0	0	0.0331377
7461	2952.65	2	0	1	0	0	0	0.033223
7463	2952.69	2	0	1	0	0	0	0.033066
7465	2952.72	2	0	1	0	0	0	0.032867
7467	2952.75	2	0	1	0	0	0	0.0321418
7469	2952.79	2	0	1	0	0	0	0.0320957
7471	2952.82	2	0	1	0	0	0	0.032043
7473	2952.85	2	0	1	0	0	0	0.0321719
7475	2952.89	2	0	1	0	0	0	0.0318321
7477	2952.92	2	0	1	0	0	0	0.0319479
7479	2952.95	2	0	1	0	0	0	0.0314189
7481	2952.99	2	0	1	0	0	0	0.0314277
7483	2953.02	2	0	1	0	0	0	0.0317512
7485	2953.05	2	0	1	0	0	0	0.0312741
7487	2953.09	2	0	1	0	0	0	0.0311705
7489	2953.12	2	0	1	0	0	0	0.0311431
7491	2953.15	2	0	1	0	0	0	0.031135
7493	2953.19	2	0	1	0	0	0	0.0310328
7495	2953.22	2	0	1	0	0	0	0.0310118
7497	2953.25	2	0	1	0	0	0	0.0313973
7499	2953.29	2	0	1	0	0	0	0.0314663
7501	2953.32	2	0	1	0	0	0	0.03138
7503	2953.35	2	0	1	0	0	0	0.0313925
7505	2953.39	2	0	1	0	0	0	0.0313533
7507	2953.42	2	0	1	0	0	0	0.031381
7509	2953.45	2	0	1	0	0	0	0.0313698
7511	2953.49	2	0	1	0	0	0	0.0312155
7513	2953.52	2	0	1	0	0	0	0.0312375
7515	2953.55	2	0	1	0	0	0	0.0311353
7517	2953.59	2	0	1	0	0	0	0.0311357
7519	2953.62	2	0	1	0	0	0	0.0310372
7521	2953.65	2	0	1	0	0	0	0.0311072
7523	2953.69	2	0	1	0	0	0	0.031159
7525	2953.72	2	0	1	0	0	0	0.0311079
7527	2953.75	2	0	1	0	0	0	0.0311296
7529	2953.79	2	0	1	0	0	0	0.0310074
7531	2953.82	2	0	1	0	0	0	0.0310203
7533	2953.85	2	0	1	0	0	0	0.0309147
7535	2953.89	2	0	1	0	0	0	0.030916
7537	2953.92	2	0	1	0	0	0	0.0308656
7539	2953.95	2	0	1	0	0	0	0.0307556
7541	2953.99	2	0	1	0	0	0	0.0307695
7543	2954.02	2	0	1	0	0	0	0.0306412
7545	2954.05	2	0	1	0	0	0	0.0308483
7547	2954.09	2	0	1	0	0	0	0.0309441
7549	2954.12	2	0	1	0	0	0	0.0309448
7551	2954.15	2	0	1	0	0	0	0.0309174
7553	2954.19	2	0	1	0	0	0	0.0307536
7555	2954.22	2	0	1	0	0	0	0.0308064
7557	2954.25	2	0	1	0	0	0	0.0306781
7559	2954.29	2	0	1	0	0	0	0.0306933
7561	2954.32	2	0	1	0	0	0	0.0306131
7563	2954.35	2	0	1	0	0	0	0.030513
7565	2954.39	2	0	1	0	0	0	0.0306659
7567	2954.42	2	0	1	0	0	0	0.0306588
7569	2954.45	2	0	1	0	0	0	0.0305461
7571	2954.49	2	0	1	0	0	0	0.0306165
7573	2954.52	2	0	1	0	0	0	0.0306585
7575	2954.55	2	0	1	0	0	0	0.030583
7577	2954.59	2	0	1	0	0	0	0.0306219
7579	2954.62	2	0	1	0	0	0	0.0304812
7581	2954.65	2	0	1	0	0	0	0.030295
7583	2954.69	2	0	1	0	0	0	0.0303888
7585	2954.72	2	0	1	0	0	0	0.0303218
7587	2954.75	2	0	1	0	0	0	0.0304849
7589	2954.79	2	0	1	0	0	0	0.0305996
7591	2954.82	2	0	1	0	0	0	0.0302845
7593	2954.85	2	0	1	0	0	0	0.030557
7595	2954.89	2	0	1	0	0	0	0.0305587
7597	2954.92	2	0	1	0	0	0	0.0308588
7599	2954.95	2	0	1	0	0	0	0.030783
7601	2954.99	2	0	1	0	0	0	0.0304788
7603	2955.02	2	0	1	0	0	0	0.0305512
7605	2955.05	2	0	1	0	0	0	0.0305177
7607	2955.09	2	0	1	0	0	0	0.0305539
7609	2955.12	2	0	1	0	0	0	0.0303265
7611	2955.15	2	0	1	0	0	0	0.0303888
7613	2955.19	2	0	1	0	0	0	0.0301167
7615	2955.22	2	0	1	0	0	0	0.0301438
7617	2955.25	2	0	1	0	0	0	0.0305708
7619	2955.29	2	0	1	0	0	0	0.0307932
7621	2955.32	2	0	1	0	0	0	0.0310446
7623	2955.35	2	0	1	0	0	0	0.0311993
7625	2955.39	2	0	1	0	0	0	0.0316866
7627	2955.42	2	0	1	0	0	0	0.0319123
7629	2955.45	2	0	1	0	0	0	0.0319479
7631	2955.49	2	0	1	0	0	0	0.0321147
7633	2955.52	2	0	1	0	0	0	0.0319935
7635	2955.55	2	0	1	0	0	0	0.0322957
7637	2955.59	2	0	1	0	0	0	0.0321617
7639	2955.62	2	0	1	0	0	0	0.0319722
7641	2955.65	2	0	1	0	0	0	0.0314724
7643	2955.69	2	0	1	0	0	0	0.0312907
7645	2955.72	2	0	1	0	0	0	0.031046
7647	2955.75	2	0	1	0	0	0	0.0304575
7649	2955.79	2	0	1	0	0	0	0.0301783
7651	2955.82	2	0	1	0	0	0	0.0303295
7653	2955.85	2	0	1	0	0	0	0.0304321
7655	2955.89	2	0	1	0	0	0	0.0305949
7657	2955.92	2	0	1	0	0	0	0.0305475
7659	2955.95	2	0	1	0	0	0	0.0305685
7661	2955.99	2	0	1	0	0	0	0.0303735
7663	2956.02	2	0	1	0	0	0	0.0306081
7665	2956.05	2	0	1	0	0	0	0.0305962
7667	2956.09	2	0	1	0	0	0	0.0306094
7669	2956.12	2	0	1	0	0	0	0.0306788
7671	2956.15	2	0	1	0	0	0	0.030539
7673	2956.19	2	0	1	0	0	0	0.0304791
7675	2956.22	2	0	1	0	0	0	0.0303461
7677	2956.25	2	0	1	0	0	0	0.0303471
7679	2956.29	2	0	1	0	0	0	0.0302551
7681	2956.32	2	0	1	0	0	0	0.0302297
7683	2956.35	2	0	1	0	0	0	0.0302835
7685	2956.39	2	0	1	0	0	0	0.0301522
7687	2956.42	2	0	1	0	0	0	0.03018
7689	2956.45	2	0	1	0	0	0	0.0301468
7691	2956.49	2	0	1	0	0	0	0.0304422
7693	2956.52	2	0	1	0	0	0	0.0302737
7695	2956.55	2	0	1	0	0	0	0.030604
7697	2956.59	2	0	1	0	0	0	0.0306216
7699	2956.62	2	0	1	0	0	0	0.030381
7701	2956.65	2	0	1	0	0	0	0.0300795
7703	2956.69	2	0	1	0	0	0	0.0303373
7705	2956.72	2	0	1	0	0	0	0.0308392
7707	2956.75	2	0	1	0	0	0	0.0308071
7709	2956.79	2	0	1	0	0	0	0.0309407
7711	2956.82	2	0	1	0	0	0	0.0314487
7713	2956.85	2	0	1	0	0	0	0.0316863
7715	2956.89	2	0	1	0	0	0	0.0320277
7717	2956.92	2	0	1	0	0	0	0.0322612
7719	2956.95	2	0	1	0	0	0	0.0325682
7721	2956.99	2	0	1	0	0	0	0.0326758
7723	2957.02	2	0	1	0	0	0	0.0328528
7725	2957.05	2	0	1	0	0	0	0.0323201
7727	2957.09	2	0	1	0	0	0	0.0319648
7729	2957.12	2	0	1	0	0	0	0.032354
7731	2957.15	2	0	1	0	0	0	0.0319831
7733	2957.19	2	0	1	0	0	0	0.0314534
7735	2957.22	2	0	1	0	0	0	0.0304964
7737	2957.25	2	0	1	0	0	0	0.0307482
7739	2957.29	2	0	1	0	0	0	0.030024
7741	2957.32	2	0	1	0	0	0	0.0296947
7743	2957.35	2	0	1	0	0	0	0.0303955
7745	2957.39	2	0	1	0	0	0	0.0305807
7747	2957.42	2	0	1	0	0	0	0.0303434
7749	2957.45	2	0	1	0	0	0	0.0302872
7751	2957.49	2	0	1	0	0	0	0.0306646
7753	2957.52	2	0	1	0	0	0	0.0302558
7755	2957.55	2	0	1	0	0	0	0.0298981
7757	2957.59	2	0	1	0	0	0	0.0305455
7759	2957.62	2	0	1	0	0	0	0.0311769
7761	2957.65	2	0	1	0	0	0	0.0315847
7763	2957.69	2	0	1	0	0	0	0.031645
7765	2957.72	2	0	1	0	0	0	0.0315201
7767	2957.75	2	0	1	0	0	0	0.0317143
7769	2957.79	2	0	1	0	0	0	0.0316264
7771	2957.82	2	0	1	0	0	0	0.0316839
7773	2957.85	2	0	1	0	0	0	0.031582
7775	2957.89	2	0	1	0	0	0	0.0316727
7777	2957.92	2	0	1	0	0	0	0.0316115
7779	2957.95	2	0	1	0	0	0	0.0315638
7781	2957.99	2	0	1	0	0	0	0.0319506
7783	2958.02	2	0	1	0	0	0	0.0321695
7785	2958.05	2	0	1	0	0	0	0.0324254
7787	2958.09	2	0	1	0	0	0	0.0329641
7789	2958.12	2	0	1	0	0	0	0.0333012
7791	2958.15	2	0	1	0	0	0	0.0334413
7793	2958.19	2	0	1	0	0	0	0.0335899
7795	2958.22	2	0	1	0	0	0	0.0335025
7797	2958.25	2	0	1	0	0	0	0.0332863
7799	2958.29	2	0	1	0	0	0	0.033267
7801	2958.32	2	0	1	0	0	0	0.0327969
7803	2958.35	2	0	1	0	0	0	0.0329299
7805	2958.39	2	0	1	0	0	0	0.0328362
7807	2958.42	2	0	1	0	0	0	0.0326643
7809	2958.45	2	0	1	0	0	0	0.0328372
7811	2958.49	2	0	1	0	0	0	0.032514
7813	2958.52	2	0	1	0	0	0	0.0327106
7815	2958.55	2	0	1	0	0	0	0.0325492
7817	2958.59	2	0	1	0	0	0	0.0326074
7819	2958.62	2	0	1	0	0	0	0.0325326
7821	2958.65	2	0	1	0	0	0	0.0325394
7823	2958.69	2	0	1	0	0	0	0.0326166
7825	2958.72	2	0	1	0	0	0	0.032756
7827	2958.75	2	0	1	0	0	0	0.0327915
7829	2958.79	2	0	1	0	0	0	0.0324666
7831	2958.82	2	0	1	0	0	0	0.0328348
7833	2958.85	2	0	1	0	0	0	0.0327905
7835	2958.89	2	0	1	0	0	0	0.0325448
7837	2958.92	2	0	1	0	0	0	0.0324017
7839	2958.95	2	0	1	0	0	0	0.0317177
7841	2958.99	2	0	1	0	0	0	0.0315709
7843	2959.02	2	0	1	0	0	0	0.0319127
7845	2959.05	2	0	1	0	0	0	0.0323093
7847	2959.09	2	0	1	0	0	0	0.0325059
7849	2959.12	2	0	1	0	0	0	0.0317323
7851	2959.15	2	0	1	0	0	0	0.03191
7853	2959.19	2	0	1	0	0	0	0.0319485
7855	2959.22	2	0	1	0	0	0	0.0317993
7857	2959.25	2	0	1	0	0	0	0.0318081
7859	2959.29	2	0	1	0	0	0	0.0323238
7861	2959.32	2	0	1	0	0	0	0.0319543
7863	2959.35	2	0	1	0	0	0	0.0320849
7865	2959.39	2	0	1	0	0	0	0.0323174
7867	2959.42	2	0	1	0	0	0	0.0323692
7869	2959.45	2	0	1	0	0	0	0.0323408
7871	2959.49	2	0	1	0	0	0	0.0322863
7873	2959.52	2	0	1	0	0	0	0.0321252
7875	2959.55	2	0	1	0	0	0	0.0320883
7877	2959.59	2	0	1	0	0	0	0.031894
7879	2959.62	2	0	1	0	0	0	0.0322602
7881	2959.65	2	0	1	0	0	0	0.0320372
7883	2959.69	2	0	1	0	0	0	0.0320562
7885	2959.72	2	0	1	0	0	0	0.0319787
7887	2959.75	2	0	1	0	0	0	0.031912
7889	2959.79	2	0	1	0	0	0	0.0319137
7891	2959.82	2	0	1	0	0	0	0.0317495
7893	2959.85	2	0	1	0	0	0	0.0317468
7895	2959.89	2	0	1	0	0	0	0.0316321
7897	2959.92	2	0	1	0	0	0	0.0316145
7899	2959.95	2	0	1	0	0	0	0.0316135
7901	2959.99	2	0	1	0	0	0	0.0315018
7903	2960.02	2	0	1	0	0	0	0.0317231
7905	2960.05	2	0	1	0	0	0	0.0315485
7907	2960.09	2	0	1	0	0	0	0.0313621
7909	2960.12	2	0	1	0	0	0	0.0316294
7911	2960.15	2	0	1	0	0	0	0.0316913
7913	2960.19	2	0	1	0	0	0	0.0315265
7915	2960.22	2	0	1	0	0	0	0.0317594
7917	2960.25	2	0	1	0	0	0	0.031892
7919	2960.29	2	0	1	0	0	0	0.0316737
7921	2960.32	2	0	1	0	0	0	0.0319235
7923	2960.35	2	0	1	0	0	0	0.0323001
7925	2960.39	2	0	1	0	0	0	0.0324331
7927	2960.42	2	0	1	0	0	0	0.0327546
7929	2960.45	2	0	1	0	0	0	0.0324287
7931	2960.49	2	0	1	0	0	0	0.0330365
7933	2960.52	2	0	1	0	0	0	0.0329208
7935	2960.55	2	0	1	0	0	0	0.0328941
7937	2960.59	2	0	1	0	0	0	0.0326893
7939	2960.62	2	0	1	0	0	0	0.0324592
7941	2960.65	2	0	1	0	0	0	0.0324149
7943	2960.69	2	0	1	0	0	0	0.0316105
7945	2960.72	2	0	1	0	0	0	0.0312734
7947	2960.75	2	0	1	0	0	0	0.0313286
7949	2960.79	2	0	1	0	0	0	0.0309712
7951	2960.82	2	0	1	0	0	0	0.0307492
7953	2960.85	2	0	1	0	0	0	0.0305109
7955	2960.89	2	0	1	0	0	0	0.0307126
7957	2960.92	2	0	1	0	0	0	0.0304991
7959	2960.95	2	0	1	0	0	0	0.0306257
7961	2960.99	2	0	1	0	0	0	0.03054
7963	2961.02	2	0	1	0	0	0	0.030757
7965	2961.05	2	0	1	0	0	0	0.0306764
7967	2961.09	2	0	1	0	0	0	0.0307935
7969	2961.12	2	0	1	0	0	0	0.0307966
7971	2961.15	2	0	1	0	0	0	0.030491
7973	2961.19	2	0	1	0	0	0	0.0303898
7975	2961.22	2	0	1	0	0	0	0.0302382
7977	2961.25	2	0	1	0	0	0	0.0301438
7979	2961.29	2	0	1	0	0	0	0.0302998
7981	2961.32	2	0	1	0	0	0	0.0299015
7983	2961.35	2	0	1	0	0	0	0.0297905
7985	2961.39	2	0	1	0	0	0	0.0300551
7987	2961.42	2	0	1	0	0	0	0.0303394
7989	2961.45	2	0	1	0	0	0	0.0305851
7991	2961.49	2	0	1	0	0	0	0.0306744
7993	2961.52	2	0	1	0	0	0	0.0313238
7995	2961.55	2	0	1	0	0	0	0.0312971
7997	2961.59	2	0	1	0	0	0	0.0311989
7999	2961.62	2	0	1	0	0	0	0.031205
8001	2961.65	2	0	1	0	0	0	0.0314507
8003	2961.69	2	0	1	0	0	0	0.0321925
8005	2961.72	2	0	1	0	0	0	0.0325397
8007	2961.75	2	0	1	0	0	0	0.0326507
8009	2961.79	2	0	1	0	0	0	0.0324135
8011	2961.82	2	0	1	0	0	0	0.0325567
8013	2961.85	2	0	1	0	0	0	0.0325282
8015	2961.89	2	0	1	0	0	0	0.0322159
8017	2961.92	2	0	1	0	0	0	0.0311438
8019	2961.95	2	0	1	0	0	0	0.0305854
8021	2961.99	2	0	1	0	0	0	0.0313106
8023	2962.02	2	0	1	0	0	0	0.0320805
8025	2962.05	2	0	1	0	0	0	0.0326027
8027	2962.09	2	0	1	0	0	0	0.0327103
8029	2962.12	2	0	1	0	0	0	0.0327902
8031	2962.15	2	0	1	0	0	0	0.0328494
8033	2962.19	2	0	1	0	0	0	0.0330606
8035	2962.22	2	0	1	0	0	0	0.0331597
8037	2962.25	2	0	1	0	0	0	0.0331621
8039	2962.29	2	0	1	0	0	0	0.0336741
8041	2962.32	2	0	1	0	0	0	0.0332359
8043	2962.35	2	0	1	0	0	0	0.0327709
8045	2962.39	2	0	1	0	0	0	0.0326683
8047	2962.42	2	0	1	0	0	0	0.0317451
8049	2962.45	2	0	1	0	0	0	0.0313418
8051	2962.49	2	0	1	0	0	0	0.031915
8053	2962.52	2	0	1	0	0	0	0.0323249
8055	2962.55	2	0	1	0	0	0	0.0329032
8057	2962.59	2	0	1	0	0	0	0.0333854
8059	2962.62	2	0	1	0	0	0	0.0334416
8061	2962.65	2	0	1	0	0	0	0.033535
8063	2962.69	2	0	1	0	0	0	0.032423
8065	2962.72	2	0	1	0	0	0	0.0320474
8067	2962.75	2	0	1	0	0	0	0.0318643
8069	2962.79	2	0	1	0	0	0	0.0312727
8071	2962.82	2	0	1	0	0	0	0.0315529
8073	2962.85	2	0	1	0	0	0	0.03189
8075	2962.89	2	0	1	0	0	0	0.032026
8077	2962.92	2	0	1	0	0	0	0.0324474
8079	2962.95	2	0	1	0	0	0	0.0324839
8081	2962.99	2	0	1	0	0	0	0.0328047
8083	2963.02	2	0	1	0	0	0	0.0327523
8085	2963.05	2	0	1	0	0	0	0.0327834
8087	2963.09	2	0	1	0	0	0	0.0327286
8089	2963.12	2	0	1	0	0	0	0.0324101
8091	2963.15	2	0	1	0	0	0	0.032736
8093	2963.19	2	0	1	0	0	0	0.0320545
8095	2963.22	2	0	1	0	0	0	0.0321986
8097	2963.25	2	0	1	0	0	0	0.0322477
8099	2963.29	2	0	1	0	0	0	0.0316037
8101	2963.32	2	0	1	0	0	0	0.0318206
8103	2963.35	2	0	1	0	0	0	0.0318697
8105	2963.39	2	0	1	0	0	0	0.0315191
8107	2963.42	2	0	1	0	0	0	0.0314
8109	2963.45	2	0	1	0	0	0	0.031936
8111	2963.49	2	0	1	0	0	0	0.0319225
8113	2963.52	2	0	1	0	0	0	0.0317184
8115	2963.55	2	0	1	0	0	0	0.031444
8117	2963.59	2	0	1	0	0	0	0.0312291
8119	2963.62	2	0	1	0	0	0	0.0310494
8121	2963.65	2	0	1	0	0	0	0.0311394
8123	2963.69	2	0	1	0	0	0	0.0317255
8125	2963.72	2	0	1	0	0	0	0.0322433
8127	2963.75	2	0	1	0	0	0	0.0322842
8129	2963.79	2	0	1	0	0	0	0.0319133
8131	2963.82	2	0	1	0	0	0	0.0316138
8133	2963.85	2	0	1	0	0	0	0.0305157
8135	2963.89	2	0	1	0	0	0	0.0300872
8137	2963.92	2	0	1	0	0	0	0.0303918
8139	2963.95	2	0	1	0	0	0	0.0304243
8141	2963.99	2	0	1	0	0	0	0.0303742
8143	2964.02	2	0	1	0	0	0	0.0310355
8145	2964.05	2	0	1	0	0	0	0.0318548
8147	2964.09	2	0	1	0	0	0	0.0321059
8149	2964.12	2	0	1	0	0	0	0.0322741
8151	2964.15	2	0	1	0	0	0	0.032582
8153	2964.19	2	0	1	0	0	0	0.0331056
8155	2964.22	2	0	1	0	0	0	0.0328491
8157	2964.25	2	0	1	0	0	0	0.0331459
8159	2964.29	2	0	1	0	0	0	0.0329963
8161	2964.32	2	0	1	0	0	0	0.0321678
8163	2964.35	2	0	1	0	0	0	0.0311522
8165	2964.39	2	0	1	0	0	0	0.0312934
8167	2964.42	2	0	1	0	0	0	0.0307384
8169	2964.45	2	0	1	0	0	0	0.0305911
8171	2964.49	2	0	1	0	0	0	0.0310774
8173	2964.52	2	0	1	0	0	0	0.0316406
8175	2964.55	2	0	1	0	0	0	0.0316802
8177	2964.59	2	0	1	0	0	0	0.0315309
8179	2964.62	2	0	1	0	0	0	0.0316335
8181	2964.65	2	0	1	0	0	0	0.0317056
8183	2964.69	2	0	1	0	0	0	0.0316846
8185	2964.72	2	0	1	0	0	0	0.0317516
8187	2964.75	2	0	1	0	0	0	0.031538
8189	2964.79	2	0	1	0	0	0	0.0314988
8191	2964.82	2	0	1	0	0	0	0.0312125
8193	2964.85	2	0	1	0	0	0	0.0310304
8195	2964.89	2	0	1	0	0	0	0.0312067
8197	2964.92	2	0	1	0	0	0	0.0311228
8199	2964.95	2	0	1	0	0	0	0.0310937
8201	2964.99	2	0	1	0	0	0	0.0308203
8203	2965.02	2	0	1	0	0	0	0.0309123
8205	2965.05	2	0	1	0	0	0	0.0313201
8207	2965.09	2	0	1	0	0	0	0.0314145
8209	2965.12	2	0	1	0	0	0	0.0313844
8211	2965.15	2	0	1	0	0	0	0.0313204
8213	2965.19	2	0	1	0	0	0	0.0312443
8215	2965.22	2	0	1	0	0	0	0.0313763
8217	2965.25	2	0	1	0	0	0	0.0316609
8219	2965.29	2	0	1	0	0	0	0.0317282
8221	2965.32	2	0	1	0	0	0	0.031361
8223	2965.35	2	0	1	0	0	0	0.0311512
8225	2965.39	2	0	1	0	0	0	0.0313956
8227	2965.42	2	0	1	0	0	0	0.0312565
8229	2965.45	2	0	1	0	0	0	0.0311888
8231	2965.49	2	0	1	0	0	0	0.0311993
8233	2965.52	2	0	1	0	0	0	0.0312179
8235	2965.55	2	0	1	0	0	0	0.0314128
8237	2965.59	2	0	1	0	0	0	0.031492
8239	2965.62	2	0	1	0	0	0	0.031557
8241	2965.65	2	0	1	0	0	0	0.0317275
8243	2965.69	2	0	1	0	0	0	0.0317377
8245	2965.72	2	0	1	0	0	0	0.0319079
8247	2965.75	2	0	1	0	0	0	0.0318974
8249	2965.79	2	0	1	0	0	0	0.0319093
8251	2965.82	2	0	1	0	0	0	0.0319289
8253	2965.85	2	0	1	0	0	0	0.0318071
8255	2965.89	2	0	1	0	0	0	0.0318748
8257	2965.92	2	0	1	0	0	0	0.0318122
8259	2965.95	2	0	1	0	0	0	0.0319441
8261	2965.99	2	0	1	0	0	0	0.0318301
8263	2966.02	2	0	1	0	0	0	0.0318521
8265	2966.05	2	0	1	0	0	0	0.0319408
8267	2966.09	2	0	1	0	0	0	0.0318602
8269	2966.12	2	0	1	0	0	0	0.0319861
8271	2966.15	2	0	1	0	0	0	0.031912
8273	2966.19	2	0	1	0	0	0	0.0319935
8275	2966.22	2	0	1	0	0	0	0.0320182
8277	2966.25	2	0	1	0	0	0	0.0319726
8279	2966.29	2	0	1	0	0	0	0.0319759
8281	2966.32	2	0	1	0	0	0	0.0318968
8283	2966.35	2	0	1	0	0	0	0.0320886
8285	2966.39	2	0	1	0	0	0	0.031977
8287	2966.42	2	0	1	0	0	0	0.0320345
8289	2966.45	2	0	1	0	0	0	0.0319651
8291	2966.49	2	0	1	0	0	0	0.0318429
8293	2966.52	2	0	1	0	0	0	0.0320128
8295	2966.55	2	0	1	0	0	0	0.0324589
8297	2966.59	2	0	1	0	0	0	0.0319292
8299	2966.62	2	0	1	0	0	0	0.0321668
8301	2966.65	2	0	1	0	0	0	0.0328172
8303	2966.69	2	0	1	0	0	0	0.0325154
8305	2966.72	2	0	1	0	0	0	0.0316436
8307	2966.75	2	0	1	0	0	0	0.0317773
8309	2966.79	2	0	1	0	0	0	0.0313401
8311	2966.82	2	0	1	0	0	0	0.0312165
8313	2966.85	2	0	1	0	0	0	0.0317678
8315	2966.89	2	0	1	0	0	0	0.0316074
8317	2966.92	2	0	1	0	0	0	0.0315922
8319	2966.95	2	0	1	0	0	0	0.0319086
8321	2966.99	2	0	1	0	0	0	0.0317363
8323	2967.02	2	0	1	0	0	0	0.0311194
8325	2967.05	2	0	1	0	0	0	0.0308568
8327	2967.09	2	0	1	0	0	0	0.0312599
8329	2967.12	2	0	1	0	0	0	0.0318064
8331	2967.15	2	0	1	0	0	0	0.0326051
8333	2967.19	2	0	1	0	0	0	0.0327414
8335	2967.22	2	0	1	0	0	0	0.0329252
8337	2967.25	2	0	1	0	0	0	0.0328447
8339	2967.29	2	0	1	0	0	0	0.0333628
8341	2967.32	2	0	1	0	0	0	0.0335029
8343	2967.35	2	0	1	0	0	0	0.0333966
8345	2967.39	2	0	1	0	0	0	0.0334416
8347	2967.42	2	0	1	0	0	0	0.0333811
8349	2967.45	2	0	1	0	0	0	0.0332772
8351	2967.49	2	0	1	0	0	0	0.0333029
8353	2967.52	2	0	1	0	0	0	0.0332883
8355	2967.55	2	0	1	0	0	0	0.0329222
8357	2967.59	2	0	1	0	0	0	0.032554
8359	2967.62	2	0	1	0	0	0	0.0329777
8361	2967.65	2	0	1	0	0	0	0.0321272
8363	2967.69	2	0	1	0	0	0	0.0318223
8365	2967.72	2	0	1	0	0	0	0.0322558
8367	2967.75	2	0	1	0	0	0	0.032071
8369	2967.79	2	0	1	0	0	0	0.03169
8371	2967.82	2	0	1	0	0	0	0.03147
8373	2967.85	2	0	1	0	0	0	0.0316578
8375	2967.89	2	0	1	0	0	0	0.0315742
8377	2967.92	2	0	1	0	0	0	0.0317093
8379	2967.95	2	0	1	0	0	0	0.0315678
8381	2967.99	2	0	1	0	0	0	0.0316626
8383	2968.02	2	0	1	0	0	0	0.0314646
8385	2968.05	2	0	1	0	0	0	0.0313594
8387	2968.09	2	0	1	0	0	0	0.031491
8389	2968.12	2	0	1	0	0	0	0.0313042
8391	2968.15	2	0	1	0	0	0	0.0314528
8393	2968.19	2	0	1	0	0	0	0.0315702
8395	2968.22	2	0	1	0	0	0	0.0316061
8397	2968.25	2	0	1	0	0	0	0.0316033
8399	2968.29	2	0	1	0	0	0	0.0315431
8401	2968.32	2	0	1	0	0	0	0.0316873
8403	2968.35	2	0	1	0	0	0	0.031491
8405	2968.39	2	0	1	0	0	0	0.0316027
8407	2968.42	2	0	1	0	0	0	0.0314896
8409	2968.45	2	0	1	0	0	0	0.0315397
8411	2968.49	2	0	1	0	0	0	0.0316331
8413	2968.52	2	0	1	0	0	0	0.031516
8415	2968.55	2	0	1	0	0	0	0.0316416
8417	2968.59	2	0	1	0	0	0	0.0314808
8419	2968.62	2	0	1	0	0	0	0.0314565
8421	2968.65	2	0	1	0	0	0	0.0314917
8423	2968.69	2	0	1	0	0	0	0.0313668
8425	2968.72	2	0	1	0	0	0	0.0315458
8427	2968.75	2	0	1	0	0	0	0.0313827
8429	2968.79	2	0	1	0	0	0	0.0316761
8431	2968.82	2	0	1	0	0	0	0.0320071
8433	2968.85	2	0	1	0	0	0	0.0320927
8435	2968.89	2	0	1	0	0	0	0.0322562
8437	2968.92	2	0	1	0	0	0	0.0324795
8439	2968.95	2	0	1	0	0	0	0.0321194
8441	2968.99	2	0	1	0	0	0	0.0312791
8443	2969.02	2	0	1	0	0	0	0.031514
8445	2969.05	2	0	1	0	0	0	0.0320182
8447	2969.09	2	0	1	0	0	0	0.0321265
8449	2969.12	2	0	1	0	0	0	0.0322809
8451	2969.15	2	0	1	0	0	0	0.0318809
8453	2969.19	2	0	1	0	0	0	0.0313448
8455	2969.22	2	0	1	0	0	0	0.0314213
8457	2969.25	2	0	1	0	0	0	0.0317225
8459	2969.29	2	0	1	0	0	0	0.0312599
8461	2969.32	2	0	1	0	0	0	0.0307461
8463	2969.35	2	0	1	0	0	0	0.0300757
8465	2969.39	2	0	1	0	0	0	0.0297969
8467	2969.42	2	0	1	0	0	0	0.029829
8469	2969.45	2	0	1	0	0	0	0.0298971
8471	2969.49	2	0	1	0	0	0	0.0299353
8473	2969.52	2	0	1	0	0	0	0.0301603
8475	2969.55	2	0	1	0	0	0	0.030937
8477	2969.59	2	0	1	0	0	0	0.0314903
8479	2969.62	2	0	1	0	0	0	0.0319103
8481	2969.65	2	0	1	0	0	0	0.0320507
8483	2969.69	2	0	1	0	0	0	0.0323194
8485	2969.72	2	0	1	0	0	0	0.0321881
8487	2969.75	2	0	1	0	0	0	0.0323221
8489	2969.79	2	0	1	0	0	0	0.0326017
8491	2969.82	2	0	1	0	0	0	0.0324511
8493	2969.85	2	0	1	0	0	0	0.0324203
8495	2969.89	2	0	1	0	0	0	0.0324995
8497	2969.92	2	0	1	0	0	0	0.0320037
8499	2969.95	2	0	1	0	0	0	0.03149
8501	2969.99	2	0	1	0	0	0	0.0316565
8503	2970.02	2	0	1	0	0	0	0.0316169
8505	2970.05	2	0	1	0	0	0	0.0316656
8507	2970.09	2	0	1	0	0	0	0.0318013
8509	2970.12	2	0	1	0	0	0	0.0318003
8511	2970.15	2	0	1	0	0	0	0.0318842
8513	2970.19	2	0	1	0	0	0	0.031938
8515	2970.22	2	0	1	0	0	0	0.031849
8517	2970.25	2	0	1	0	0	0	0.0318196
8519	2970.29	2	0	1	0	0	0	0.0317956
8521	2970.32	2	0	1	0	0	0	0.0317137
8523	2970.35	2	0	1	0	0	0	0.0318338
8525	2970.39	2	0	1	0	0	0	0.0318538
8527	2970.42	2	0	1	0	0	0	0.0317143
8529	2970.45	2	0	1	0	0	0	0.0317211
8531	2970.49	2	0	1	0	0	0	0.0317729
8533	2970.52	2	0	1	0	0	0	0.0318758
8535	2970.55	2	0	1	0	0	0	0.031803
8537	2970.59	2	0	1	0	0	0	0.0317969
8539	2970.62	2	0	1	0	0	0	0.0317187
8541	2970.65	2	0	1	0	0	0	0.0316284
8543	2970.69	2	0	1	0	0	0	0.0317763
8545	2970.72	2	0	1	0	0	0	0.0317242
8547	2970.75	2	0	1	0	0	0	0.0317157
8549	2970.79	2	0	1	0	0	0	0.0316839
8551	2970.82	2	0	1	0	0	0	0.031666
8553	2970.85	2	0	1	0	0	0	0.031689
8555	2970.89	2	0	1	0	0	0	0.0316616
8557	2970.92	2	0	1	0	0	0	0.0316325
8559	2970.95	2	0	1	0	0	0	0.0317062
8561	2970.99	2	0	1	0	0	0	0.0317431
8563	2971.02	2	0	1	0	0	0	0.0316981
8565	2971.05	2	0	1	0	0	0	0.031735
8567	2971.09	2	0	1	0	0	0	0.0319144
8569	2971.12	2	0	1	0	0	0	0.0319072
8571	2971.15	2	0	1	0	0	0	0.0318893
8573	2971.19	2	0	1	0	0	0	0.0317915
8575	2971.22	2	0	1	0	0	0	0.0318369
8577	2971.25	2	0	1	0	0	0	0.0317861
8579	2971.29	2	0	1	0	0	0	0.0317726
8581	2971.32	2	0	1	0	0	0	0.0317966
8583	2971.35	2	0	1	0	0	0	0.0316656
8585	2971.39	2	0	1	0	0	0	0.0316639
8587	2971.42	2	0	1	0	0	0	0.0317803
8589	2971.45	2	0	1	0	0	0	0.0317675
8591	2971.49	2	0	1	0	0	0	0.0316873
8593	2971.52	2	0	1	0	0	0	0.0318605
8595	2971.55	2	0	1	0	0	0	0.0318605
8597	2971.59	2	0	1	0	0	0	0.0317715
8599	2971.62	2	0	1	0	0	0	0.0317265
8601	2971.65	2	0	1	0	0	0	0.0317814
8603	2971.69	2	0	1	0	0	0	0.0316974
8605	2971.72	2	0	1	0	0	0	0.0313089
8607	2971.75	2	0	1	0	0	0	0.0309857
8609	2971.79	2	0	1	0	0	0	0.0311972
8611	2971.82	2	0	1	0	0	0	0.0308954
8613	2971.85	2	0	1	0	0	0	0.0308348
8615	2971.89	2	0	1	0	0	0	0.0311424
8617	2971.92	2	0	1	0	0	0	0.0309624
8619	2971.95	2	0	1	0	0	0	0.0313935
8621	2971.99	2	0	1	0	0	0	0.0310467
8623	2972.02	2	0	1	0	0	0	0.0309468
8625	2972.05	2	0	1	0	0	0	0.0313218
8627	2972.09	2	0	1	0	0	0	0.0310152
8629	2972.12	2	0	1	0	0	0	0.0311218
8631	2972.15	2	0	1	0	0	0	0.0315191
8633	2972.19	2	0	1	0	0	0	0.031244
8635	2972.22	2	0	1	0	0	0	0.0313448
8637	2972.25	2	0	1	0	0	0	0.0310314
8639	2972.29	2	0	1	0	0	0	0.0308697
8641	2972.32	2	0	1	0	0	0	0.031158
8643	2972.35	2	0	1	0	0	0	0.0307495
8645	2972.39	2	0	1	0	0	0	0.0307062
8647	2972.42	2	0	1	0	0	0	0.0307857
8649	2972.45	2	0	1	0	0	0	0.0304463
8651	2972.49	2	0	1	0	0	0	0.030625
8653	2972.52	2	0	1	0	0	0	0.0306774
8655	2972.55	2	0	1	0	0	0	0.0302121
8657	2972.59	2	0	1	0	0	0	0.0303411
8659	2972.62	2	0	1	0	0	0	0.0304114
8661	2972.65	2	0	1	0	0	0	0.0298669
8663	2972.69	2	0	1	0	0	0	0.0305417
8665	2972.72	2	0	1	0	0	0	0.0312324
8667	2972.75	2	0	1	0	0	0	0.031778
8669	2972.79	2	0	1	0	0	0	0.0318869
8671	2972.82	2	0	1	0	0	0	0.0317766
8673	2972.85	2	0	1	0	0	0	0.0319028
8675	2972.89	2	0	1	0	0	0	0.0319191
8677	2972.92	2	0	1	0	0	0	0.0319942
8679	2972.95	2	0	1	0	0	0	0.0322027
8681	2972.99	2	0	1	0	0	0	0.0320308
8683	2973.02	2	0	1	0	0	0	0.0322057
8685	2973.05	2	0	1	0	0	0	0.0318369
8687	2973.09	2	0	1	0	0	0	0.0318318
8689	2973.12	2	0	1	0	0	0	0.0319367
8691	2973.15	2	0	1	0	0	0	0.0318199
8693	2973.19	2	0	1	0	0	0	0.0318277
8695	2973.22	2	0	1	0	0	0	0.0318805
8697	2973.25	2	0	1	0	0	0	0.0319526
8699	2973.29	2	0	1	0	0	0	0.0321421
8701	2973.32	2	0	1	0	0	0	0.0328914
8703	2973.35	2	0	1	0	0	0	0.0331218
8705	2973.39	2	0	1	0	0	0	0.0332233
8707	2973.42	2	0	1	0	0	0	0.0332677
8709	2973.45	2	0	1	0	0	0	0.0328619
8711	2973.49	2	0	1	0	0	0	0.0326616
8713	2973.52	2	0	1	0	0	0	0.0322389
8715	2973.55	2	0	1	0	0	0	0.0320328
8717	2973.59	2	0	1	0	0	0	0.0319641
8719	2973.62	2	0	1	0	0	0	0.0319468
8721	2973.65	2	0	1	0	0	0	0.032049
8723	2973.69	2	0	1	0	0	0	0.0326101
8725	2973.72	2	0	1	0	0	0	0.0327475
8727	2973.75	2	0	1	0	0	0	0.0332122
8729	2973.79	2	0	1	0	0	0	0.0332118
8731	2973.82	2	0	1	0	0	0	0.033289
8733	2973.85	2	0	1	0	0	0	0.0328298
8735	2973.89	2	0	1	0	0	0	0.0326399
8737	2973.92	2	0	1	0	0	0	0.0323079
8739	2973.95	2	0	1	0	0	0	0.0316071
8741	2973.99	2	0	1	0	0	0	0.0320399
8743	2974.02	2	0	1	0	0	0	0.0317523
8745	2974.05	2	0	1	0	0	0	0.0317698
8747	2974.09	2	0	1	0	0	0	0.0318809
8749	2974.12	2	0	1	0	0	0	0.0318067
8751	2974.15	2	0	1	0	0	0	0.0325161
8753	2974.19	2	0	1	0	0	0	0.0326386
8755	2974.22	2	0	1	0	0	0	0.0331154
8757	2974.25	2	0	1	0	0	0	0.0331337
8759	2974.29	2	0	1	0	0	0	0.0331178
8761	2974.32	2	0	1	0	0	0	0.0327536
8763	2974.35	2	0	1	0	0	0	0.0322213
8765	2974.39	2	0	1	0	0	0	0.0322568
8767	2974.42	2	0	1	0	0	0	0.0321462
8769	2974.45	2	0	1	0	0	0	0.0315018
8771	2974.49	2	0	1	0	0	0	0.0313397
8773	2974.52	2	0	1	0	0	0	0.0314402
8775	2974.55	2	0	1	0	0	0	0.0312731
8777	2974.59	2	0	1	0	0	0	0.0309397
8779	2974.62	2	0	1	0	0	0	0.0309939
8781	2974.65	2	0	1	0	0	0	0.0314348
8783	2974.69	2	0	1	0	0	0	0.0314646
8785	2974.72	2	0	1	0	0	0	0.0318896
8787	2974.75	2	0	1	0	0	0	0.0322061
8789	2974.79	2	0	1	0	0	0	0.0323925
8791	2974.82	2	0	1	0	0	0	0.0323221
8793	2974.85	2	0	1	0	0	0	0.0325516
8795	2974.89	2	0	1	0	0	0	0.0325946
8797	2974.92	2	0	1	0	0	0	0.0322
8799	2974.95	2	0	1	0	0	0	0.0320639
8801	2974.99	2	0	1	0	0	0	0.0323604
8803	2975.02	2	0	1	0	0	0	0.0323722
8805	2975.05	2	0	1	0	0	0	0.0321844
8807	2975.09	2	0	1	0	0	0	0.0322379
8809	2975.12	2	0	1	0	0	0	0.0320869
8811	2975.15	2	0	1	0	0	0	0.03211
8813	2975.19	2	0	1	0	0	0	0.0315902
8815	2975.22	2	0	1	0	0	0	0.0316419
8817	2975.25	2	0	1	0	0	0	0.0316473
8819	2975.29	2	0	1	0	0	0	0.0312382
8821	2975.32	2	0	1	0	0	0	0.0311641
8823	2975.35	2	0	1	0	0	0	0.031095
8825	2975.39	2	0	1	0	0	0	0.0314209
8827	2975.42	2	0	1	0	0	0	0.0314352
8829	2975.45	2	0	1	0	0	0	0.0311824
8831	2975.49	2	0	1	0	0	0	0.0311478
8833	2975.52	2	0	1	0	0	0	0.0310575
8835	2975.55	2	0	1	0	0	0	0.0312054
8837	2975.59	2	0	1	0	0	0	0.0312308
8839	2975.62	2	0	1	0	0	0	0.0312629
8841	2975.65	2	0	1	0	0	0	0.0313123
8843	2975.69	2	0	1	0	0	0	0.0313286
8845	2975.72	2	0	1	0	0	0	0.0312162
8847	2975.75	2	0	1	0	0	0	0.0306889
8849	2975.79	2	0	1	0	0	0	0.0300876
8851	2975.82	2	0	1	0	0	0	0.0298196
8853	2975.85	2	0	1	0	0	0	0.0303197
8855	2975.89	2	0	1	0	0	0	0.0305783
8857	2975.92	2	0	1	0	0	0	0.0311387
8859	2975.95	2	0	1	0	0	0	0.0312013
8861	2975.99	2	0	1	0	0	0	0.0312609
8863	2976.02	2	0	1	0	0	0	0.031228
8865	2976.05	2	0	1	0	0	0	0.03147
8867	2976.09	2	0	1	0	0	0	0.031821
8869	2976.12	2	0	1	0	0	0	0.0319167
8871	2976.15	2	0	1	0	0	0	0.0313729
8873	2976.19	2	0	1	0	0	0	0.0310511
8875	2976.22	2	0	1	0	0	0	0.0312423
8877	2976.25	2	0	1	0	0	0	0.0313675
8879	2976.29	2	0	1	0	0	0	0.0311597
8881	2976.32	2	0	1	0	0	0	0.0311912
8883	2976.35	2	0	1	0	0	0	0.0310849
8885	2976.39	2	0	1	0	0	0	0.0310392
8887	2976.42	2	0	1	0	0	0	0.0310372
8889	2976.45	2	0	1	0	0	0	0.0308558
8891	2976.49	2	0	1	0	0	0	0.0311614
8893	2976.52	2	0	1	0	0	0	0.0310372
8895	2976.55	2	0	1	0	0	0	0.0311739
8897	2976.59	2	0	1	0	0	0	0.0310277
8899	2976.62	2	0	1	0	0	0	0.0309262
8901	2976.65	2	0	1	0	0	0	0.030915
8903	2976.69	2	0	1	0	0	0	0.0307434
8905	2976.72	2	0	1	0	0	0	0.0309113
8907	2976.75	2	0	1	0	0	0	0.0307353
8909	2976.79	2	0	1	0	0	0	0.0308115
8911	2976.82	2	0	1	0	0	0	0.0307824
8913	2976.85	2	0	1	0	0	0	0.0306362
8915	2976.89	2	0	1	0	0	0	0.0307692
8917	2976.92	2	0	1	0	0	0	0.0306781
8919	2976.95	2	0	1	0	0	0	0.0306094
8921	2976.99	2	0	1	0	0	0	0.0309329
8923	2977.02	2	0	1	0	0	0	0.031555
8925	2977.05	2	0	1	0	0	0	0.0321594
8927	2977.09	2	0	1	0	0	0	0.0319171
8929	2977.12	2	0	1	0	0	0	0.0323205
8931	2977.15	2	0	1	0	0	0	0.0324162
8933	2977.19	2	0	1	0	0	0	0.0329025
8935	2977.22	2	0	1	0	0	0	0.033
8937	2977.25	2	0	1	0	0	0	0.0330389
8939	2977.29	2	0	1	0	0	0	0.0329222
8941	2977.32	2	0	1	0	0	0	0.032533
8943	2977.35	2	0	1	0	0	0	0.0322078
8945	2977.39	2	0	1	0	0	0	0.0313786
8947	2977.42	2	0	1	0	0	0	0.031577
8949	2977.45	2	0	1	0	0	0	0.0319871
8951	2977.49	2	0	1	0	0	0	0.0319326
8953	2977.52	2	0	1	0	0	0	0.0319052
8955	2977.55	2	0	1	0	0	0	0.0321367
8957	2977.59	2	0	1	0	0	0	0.0320301
8959	2977.62	2	0	1	0	0	0	0.0313763
8961	2977.65	2	0	1	0	0	0	0.0315566
8963	2977.69	2	0	1	0	0	0	0.0315198
8965	2977.72	2	0	1	0	0	0	0.0311384
8967	2977.75	2	0	1	0	0	0	0.0312869
8969	2977.79	2	0	1	0	0	0	0.03116
8971	2977.82	2	0	1	0	0	0	0.0306081
8973	2977.85	2	0	1	0	0	0	0.0302385
8975	2977.89	2	0	1	0	0	0	0.0302916
8977	2977.92	2	0	1	0	0	0	0.0308409
8979	2977.95	2	0	1	0	0	0	0.0311509
8981	2977.99	2	0	1	0	0	0	0.0316203
8983	2978.02	2	0	1	0	0	0	0.0312399
8985	2978.05	2	0	1	0	0	0	0.031294
8987	2978.09	2	0	1	0	0	0	0.0313698
8989	2978.12	2	0	1	0	0	0	0.0312754
8991	2978.15	2	0	1	0	0	0	0.0314917
8993	2978.19	2	0	1	0	0	0	0.0313011
8995	2978.22	2	0	1	0	0	0	0.031714
8997	2978.25	2	0	1	0	0	0	0.0323875
8999	2978.29	2	0	1	0	0	0	0.0324484
9001	2978.32	2	0	1	0	0	0	0.0325428
9003	2978.35	2	0	1	0	0	0	0.0329035
9005	2978.39	2	0	1	0	0	0	0.0325276
9007	2978.42	2	0	1	0	0	0	0.032555
9009	2978.45	2	0	1	0	0	0	0.0329793
9011	2978.49	2	0	1	0	0	0	0.0324724
9013	2978.52	2	0	1	0	0	0	0.0323184
9015	2978.55	2	0	1	0	0	0	0.0325604
9017	2978.59	2	0	1	0	0	0	0.0319671
9019	2978.62	2	0	1	0	0	0	0.0319868
9021	2978.65	2	0	1	0	0	0	0.0320338
9023	2978.69	2	0	1	0	0	0	0.0318071
9025	2978.72	2	0	1	0	0	0	0.0320094
9027	2978.75	2	0	1	0	0	0	0.0317922
9029	2978.79	2	0	1	0	0	0	0.0316331
9031	2978.82	2	0	1	0	0	0	0.032049
9033	2978.85	2	0	1	0	0	0	0.0316074
9035	2978.89	2	0	1	0	0	0	0.0318396
9037	2978.92	2	0	1	0	0	0	0.0324392
9039	2978.95	2	0	1	0	0	0	0.0322974
9041	2978.99	2	0	1	0	0	0	0.0322281
9043	2979.02	2	0	1	0	0	0	0.0328213
9045	2979.05	2	0	1	0	0	0	0.0331134
9047	2979.09	2	0	1	0	0	0	0.0329262
9049	2979.12	2	0	1	0	0	0	0.0329851
9051	2979.15	2	0	1	0	0	0	0.0328128
9053	2979.19	2	0	1	0	0	0	0.0323854
9055	2979.22	2	0	1	0	0	0	0.0323614
9057	2979.25	2	0	1	0	0	0	0.0324078
9059	2979.29	2	0	1	0	0	0	0.0322111
9061	2979.32	2	0	1	0	0	0	0.0322054
9063	2979.35	2	0	1	0	0	0	0.0321776
9065	2979.39	2	0	1	0	0	0	0.0323313
9067	2979.42	2	0	1	0	0	0	0.0325042
9069	2979.45	2	0	1	0	0	0	0.0327303
9071	2979.49	2	0	1	0	0	0	0.0327313
9073	2979.52	2	0	1	0	0	0	0.032532
9075	2979.55	2	0	1	0	0	0	0.0323502
9077	2979.59	2	0	1	0	0	0	0.0325184
9079	2979.62	2	0	1	0	0	0	0.0324626
9081	2979.65	2	0	1	0	0	0	0.0324254
9083	2979.69	2	0	1	0	0	0	0.0323709
9085	2979.72	2	0	1	0	0	0	0.0322524
9087	2979.75	2	0	1	0	0	0	0.0324568
9089	2979.79	2	0	1	0	0	0	0.0325709
9091	2979.82	2	0	1	0	0	0	0.032781
9093	2979.85	2	0	1	0	0	0	0.03227
9095	2979.89	2	0	1	0	0	0	0.0318061
9097	2979.92	2	0	1	0	0	0	0.0320105
9099	2979.95	2	0	1	0	0	0	0.0321861
9101	2979.99	2	0	1	0	0	0	0.0320663
9103	2980.02	2	0	1	0	0	0	0.0318605
9105	2980.05	2	0	1	0	0	0	0.0318348
9107	2980.09	2	0	1	0	0	0	0.0318653
9109	2980.12	2	0	1	0	0	0	0.0314978
9111	2980.15	2	0	1	0	0	0	0.0316003
9113	2980.19	2	0	1	0	0	0	0.0313857
9115	2980.22	2	0	1	0	0	0	0.0307292
9117	2980.25	2	0	1	0	0	0	0.0308849
9119	2980.29	2	0	1	0	0	0	0.0316433
9121	2980.32	2	0	1	0	0	0	0.0319539
9123	2980.35	2	0	1	0	0	0	0.0322115
9125	2980.39	2	0	1	0	0	0	0.0324991
9127	2980.42	2	0	1	0	0	0	0.0325986
9129	2980.45	2	0	1	0	0	0	0.0327878
9131	2980.49	2	0	1	0	0	0	0.0328179
9133	2980.52	2	0	1	0	0	0	0.0330741
9135	2980.55	2	0	1	0	0	0	0.032848
9137	2980.59	2	0	1	0	0	0	0.0331134
9139	2980.62	2	0	1	0	0	0	0.0333668
9141	2980.65	2	0	1	0	0	0	0.0332355
9143	2980.69	2	0	1	0	0	0	0.033086
9145	2980.72	2	0	1	0	0	0	0.0328416
9147	2980.75	2	0	1	0	0	0	0.032932
9149	2980.79	2	0	1	0	0	0	0.033025
9151	2980.82	2	0	1	0	0	0	0.0328081
9153	2980.85	2	0	1	0	0	0	0.032935
9155	2980.89	2	0	1	0	0	0	0.0330958
9157	2980.92	2	0	1	0	0	0	0.0332193
9159	2980.95	2	0	1	0	0	0	0.0327117
9161	2980.99	2	0	1	0	0	0	0.0326951
9163	2981.02	2	0	1	0	0	0	0.032825
9165	2981.05	2	0	1	0	0	0	0.0327878
9167	2981.09	2	0	1	0	0	0	0.0328436
9169	2981.12	2	0	1	0	0	0	0.0329086
9171	2981.15	2	0	1	0	0	0	0.0329743
9173	2981.19	2	0	1	0	0	0	0.032843
9175	2981.22	2	0	1	0	0	0	0.0329008
9177	2981.25	2	0	1	0	0	0	0.0327452
9179	2981.29	2	0	1	0	0	0	0.0326843
9181	2981.32	2	0	1	0	0	0	0.0325861
9183	2981.35	2	0	1	0	0	0	0.0325134
9185	2981.39	2	0	1	0	0	0	0.0326748
9187	2981.42	2	0	1	0	0	0	0.032492
9189	2981.45	2	0	1	0	0	0	0.0322663
9191	2981.49	2	0	1	0	0	0	0.0320721
9193	2981.52	2	0	1	0	0	0	0.0321083
9195	2981.55	2	0	1	0	0	0	0.032043
9197	2981.59	2	0	1	0	0	0	0.0318893
9199	2981.62	2	0	1	0	0	0	0.0319732
9201	2981.65	2	0	1	0	0	0	0.0316033
9203	2981.69	2	0	1	0	0	0	0.0316203
9205	2981.72	2	0	1	0	0	0	0.0321665
9207	2981.75	2	0	1	0	0	0	0.0323611
9209	2981.79	2	0	1	0	0	0	0.0320822
9211	2981.82	2	0	1	0	0	0	0.0317539
9213	2981.85	2	0	1	0	0	0	0.0320017
9215	2981.89	2	0	1	0	0	0	0.0315918
9217	2981.92	2	0	1	0	0	0	0.0311749
9219	2981.95	2	0	1	0	0	0	0.0314044
9221	2981.99	2	0	1	0	0	0	0.0313238
9223	2982.02	2	0	1	0	0	0	0.0316893
9225	2982.05	2	0	1	0	0	0	0.0317597
9227	2982.09	2	0	1	0	0	0	0.0322206
9229	2982.12	2	0	1	0	0	0	0.0329526
9231	2982.15	2	0	1	0	0	0	0.0332044
9233	2982.19	2	0	1	0	0	0	0.0330464
9235	2982.22	2	0	1	0	0	0	0.0332217
9237	2982.25	2	0	1	0	0	0	0.0332504
9239	2982.29	2	0	1	0	0	0	0.0330071
9241	2982.32	2	0	1	0	0	0	0.0328893
9243	2982.35	2	0	1	0	0	0	0.0330365
9245	2982.39	2	0	1	0	0	0	0.0331716
9247	2982.42	2	0	1	0	0	0	0.0328037
9249	2982.45	2	0	1	0	0	0	0.0323215
9251	2982.49	2	0	1	0	0	0	0.032643
9253	2982.52	2	0	1	0	0	0	0.0322081
9255	2982.55	2	0	1	0	0	0	0.0320064
9257	2982.59	2	0	1	0	0	0	0.0321915
9259	2982.62	2	0	1	0	0	0	0.0321204
9261	2982.65	2	0	1	0	0	0	0.0318609
9263	2982.69	2	0	1	0	0	0	0.0315411
9265	2982.72	2	0	1	0	0	0	0.0314978
9267	2982.75	2	0	1	0	0	0	0.0319878
9269	2982.79	2	0	1	0	0	0	0.0323699
9271	2982.82	2	0	1	0	0	0	0.0324416
9273	2982.85	2	0	1	0	0	0	0.0324805
9275	2982.89	2	0	1	0	0	0	0.0319533
9277	2982.92	2	0	1	0	0	0	0.0322954
9279	2982.95	2	0	1	0	0	0	0.0325245
9281	2982.99	2	0	1	0	0	0	0.0326088
9283	2983.02	2	0	1	0	0	0	0.0324565
9285	2983.05	2	0	1	0	0	0	0.0322741
9287	2983.09	2	0	1	0	0	0	0.0322044
9289	2983.12	2	0	1	0	0	0	0.0321699
9291	2983.15	2	0	1	0	0	0	0.0323506
9293	2983.19	2	0	1	0	0	0	0.032177
9295	2983.22	2	0	1	0	0	0	0.0315262
9297	2983.25	2	0	1	0	0	0	0.0320744
9299	2983.29	2	0	1	0	0	0	0.0321394
9301	2983.32	2	0	1	0	0	0	0.0321184
9303	2983.35	2	0	1	0	0	0	0.0322514
9305	2983.39	2	0	1	0	0	0	0.0324433
9307	2983.42	2	0	1	0	0	0	0.0325617
9309	2983.45	2	0	1	0	0	0	0.0325949
9311	2983.49	2	0	1	0	0	0	0.0325343
9313	2983.52	2	0	1	0	0	0	0.0324413
9315	2983.55	2	0	1	0	0	0	0.0326091
9317	2983.59	2	0	1	0	0	0	0.0326856
9319	2983.62	2	0	1	0	0	0	0.0327039
9321	2983.65	2	0	1	0	0	0	0.0326308
9323	2983.69	2	0	1	0	0	0	0.0324602
9325	2983.72	2	0	1	0	0	0	0.0323966
9327	2983.75	2	0	1	0	0	0	0.0319523
9329	2983.79	2	0	1	0	0	0	0.0322111
9331	2983.82	2	0	1	0	0	0	0.0320964
9333	2983.85	2	0	1	0	0	0	0.0312057
9335	2983.89	2	0	1	0	0	0	0.0315072
9337	2983.92	2	0	1	0	0	0	0.0322964
9339	2983.95	2	0	1	0	0	0	0.0321529
9341	2983.99	2	0	1	0	0	0	0.0318622
9343	2984.02	2	0	1	0	0	0	0.0321269
9345	2984.05	2	0	1	0	0	0	0.031646
9347	2984.09	2	0	1	0	0	0	0.0313783
9349	2984.12	2	0	1	0	0	0	0.031759
9351	2984.15	2	0	1	0	0	0	0.0320825
9353	2984.19	2	0	1	0	0	0	0.0323986
9355	2984.22	2	0	1	0	0	0	0.0324487
9357	2984.25	2	0	1	0	0	0	0.0328271
9359	2984.29	2	0	1	0	0	0	0.032624
9361	2984.32	2	0	1	0	0	0	0.0325377
9363	2984.35	2	0	1	0	0	0	0.032021
9365	2984.39	2	0	1	0	0	0	0.031428
9367	2984.42	2	0	1	0	0	0	0.0315451
9369	2984.45	2	0	1	0	0	0	0.0316978
9371	2984.49	2	0	1	0	0	0	0.0317742
9373	2984.52	2	0	1	0	0	0	0.0319939
9375	2984.55	2	0	1	0	0	0	0.031845
9377	2984.59	2	0	1	0	0	0	0.0315885
9379	2984.62	2	0	1	0	0	0	0.0316947
9381	2984.65	2	0	1	0	0	0	0.0316761
9383	2984.69	2	0	1	0	0	0	0.0313932
9385	2984.72	2	0	1	0	0	0	0.031672
9387	2984.75	2	0	1	0	0	0	0.0317756
9389	2984.79	2	0	1	0	0	0	0.0317492
9391	2984.82	2	0	1	0	0	0	0.0316883
9393	2984.85	2	0	1	0	0	0	0.0319655
9395	2984.89	2	0	1	0	0	0	0.0317519
9397	2984.92	2	0	1	0	0	0	0.0315265
9399	2984.95	2	0	1	0	0	0	0.0316819
9401	2984.99	2	0	1	0	0	0	0.0313932
9403	2985.02	2	0	1	0	0	0	0.0315164
9405	2985.05	2	0	1	0	0	0	0.0314497
9407	2985.09	2	0	1	0	0	0	0.031511
9409	2985.12	2	0	1	0	0	0	0.0317252
9411	2985.15	2	0	1	0	0	0	0.0318061
9413	2985.19	2	0	1	0	0	0	0.0317441
9415	2985.22	2	0	1	0	0	0	0.0316798
9417	2985.25	2	0	1	0	0	0	0.0317847
9419	2985.29	2	0	1	0	0	0	0.0317844
9421	2985.32	2	0	1	0	0	0	0.0318589
9423	2985.35	2	0	1	0	0	0	0.0317201
9425	2985.39	2	0	1	0	0	0	0.0316145
9427	2985.42	2	0	1	0	0	0	0.0316081
9429	2985.45	2	0	1	0	0	0	0.0315533
9431	2985.49	2	0	1	0	0	0	0.0316436
9433	2985.52	2	0	1	0	0	0	0.0316199
9435	2985.55	2	0	1	0	0	0	0.0315675
9437	2985.59	2	0	1	0	0	0	0.0317133
9439	2985.62	2	0	1	0	0	0	0.0313634
9441	2985.65	2	0	1	0	0	0	0.0315032
9443	2985.69	2	0	1	0	0	0	0.0314978
9445	2985.72	2	0	1	0	0	0	0.0314927
9447	2985.75	2	0	1	0	0	0	0.0317218
9449	2985.79	2	0	1	0	0	0	0.0314724
9451	2985.82	2	0	1	0	0	0	0.0316683
9453	2985.85	2	0	1	0	0	0	0.0314995
9455	2985.89	2	0	1	0	0	0	0.0314629
9457	2985.92	2	0	1	0	0	0	0.0312321
9459	2985.95	2	0	1	0	0	0	0.0311536
9461	2985.99	2	0	1	0	0	0	0.0315042
9463	2986.02	2	0	1	0	0	0	0.0313316
9465	2986.05	2	0	1	0	0	0	0.0314494
9467	2986.09	2	0	1	0	0	0	0.0315394
9469	2986.12	2	0	1	0	0	0	0.0315472
9471	2986.15	2	0	1	0	0	0	0.0317739
9473	2986.19	2	0	1	0	0	0	0.0315912
9475	2986.22	2	0	1	0	0	0	0.0317468
9477	2986.25	2	0	1	0	0	0	0.0316402
9479	2986.29	2	0	1	0	0	0	0.031666
9481	2986.32	2	0	1	0	0	0	0.03167
9483	2986.35	2	0	1	0	0	0	0.0318176
9485	2986.39	2	0	1	0	0	0	0.0317783
9487	2986.42	2	0	1	0	0	0	0.0316666
9489	2986.45	2	0	1	0	0	0	0.0318978
9491	2986.49	2	0	1	0	0	0	0.0316978
9493	2986.52	2	0	1	0	0	0	0.0318308
9495	2986.55	2	0	1	0	0	0	0.0316995
9497	2986.59	2	0	1	0	0	0	0.0315451
9499	2986.62	2	0	1	0	0	0	0.0318656
9501	2986.65	2	0	1	0	0	0	0.0318433
9503	2986.69	2	0	1	0	0	0	0.0317793
9505	2986.72	2	0	1	0	0	0	0.0318876
9507	2986.75	2	0	1	0	0	0	0.0319276
9509	2986.79	2	0	1	0	0	0	0.0319841
9511	2986.82	2	0	1	0	0	0	0.0319174
9513	2986.85	2	0	1	0	0	0	0.0318396
9515	2986.89	2	0	1	0	0	0	0.0316084
9517	2986.92	2	0	1	0	0	0	0.0316088
9519	2986.95	2	0	1	0	0	0	0.031624
9521	2986.99	2	0	1	0	0	0	0.0315969
9523	2987.02	2	0	1	0	0	0	0.0317465
9525	2987.05	2	0	1	0	0	0	0.0318081
9527	2987.09	2	0	1	0	0	0	0.0320094
9529	2987.12	2	0	1	0	0	0	0.0320419
9531	2987.15	2	0	1	0	0	0	0.0320213
9533	2987.19	2	0	1	0	0	0	0.0319154
9535	2987.22	2	0	1	0	0	0	0.0317935
9537	2987.25	2	0	1	0	0	0	0.0318457
9539	2987.29	2	0	1	0	0	0	0.0316957
9541	2987.32	2	0	1	0	0	0	0.0317174
9543	2987.35	2	0	1	0	0	0	0.0316396
9545	2987.39	2	0	1	0	0	0	0.0315164
9547	2987.42	2	0	1	0	0	0	0.0314792
9549	2987.45	2	0	1	0	0	0	0.031403
9551	2987.49	2	0	1	0	0	0	0.0313607
9553	2987.52	2	0	1	0	0	0	0.0313874
9555	2987.55	2	0	1	0	0	0	0.0313732
9557	2987.59	2	0	1	0	0	0	0.0314
9559	2987.62	2	0	1	0	0	0	0.0317682
9561	2987.65	2	0	1	0	0	0	0.0319384
9563	2987.69	2	0	1	0	0	0	0.031783
9565	2987.72	2	0	1	0	0	0	0.0317996
9567	2987.75	2	0	1	0	0	0	0.0312514
9569	2987.79	2	0	1	0	0	0	0.031005
9571	2987.82	2	0	1	0	0	0	0.0309221
9573	2987.85	2	0	1	0	0	0	0.0310619
9575	2987.89	2	0	1	0	0	0	0.0309607
9577	2987.92	2	0	1	0	0	0	0.0308077
9579	2987.95	2	0	1	0	0	0	0.0313418
9581	2987.99	2	0	1	0	0	0	0.0313797
9583	2988.02	2	0	1	0	0	0	0.0310314
9585	2988.05	2	0	1	0	0	0	0.031091
9587	2988.09	2	0	1	0	0	0	0.03156
9589	2988.12	2	0	1	0	0	0	0.031713
9591	2988.15	2	0	1	0	0	0	0.0320078
9593	2988.19	2	0	1	0	0	0	0.0325604
9595	2988.22	2	0	1	0	0	0	0.0325851
9597	2988.25	2	0	1	0	0	0	0.0323827
9599	2988.29	2	0	1	0	0	0	0.0325438
9601	2988.32	2	0	1	0	0	0	0.0317817
9603	2988.35	2	0	1	0	0	0	0.0320484
9605	2988.39	2	0	1	0	0	0	0.0322622
9607	2988.42	2	0	1	0	0	0	0.0323492
9609	2988.45	2	0	1	0	0	0	0.0322054
9611	2988.49	2	0	1	0	0	0	0.0320968
9613	2988.52	2	0	1	0	0	0	0.0321716
9615	2988.55	2	0	1	0	0	0	0.0323401
9617	2988.59	2	0	1	0	0	0	0.0323076
9619	2988.62	2	0	1	0	0	0	0.0319976
9621	2988.65	2	0	1	0	0	0	0.0323269
9623	2988.69	2	0	1	0	0	0	0.0319411
9625	2988.72	2	0	1	0	0	0	0.0320585
9627	2988.75	2	0	1	0	0	0	0.0323357
9629	2988.79	2	0	1	0	0	0	0.0322531
9631	2988.82	2	0	1	0	0	0	0.0323096
9633	2988.85	2	0	1	0	0	0	0.0321221
9635	2988.89	2	0	1	0	0	0	0.0323411
9637	2988.92	2	0	1	0	0	0	0.0322903
9639	2988.95	2	0	1	0	0	0	0.0322507
9641	2988.99	2	0	1	0	0	0	0.0322254
9643	2989.02	2	0	1	0	0	0	0.0322751
9645	2989.05	2	0	1	0	0	0	0.0324067
9647	2989.09	2	0	1	0	0	0	0.0323672
9649	2989.12	2	0	1	0	0	0	0.0324091
9651	2989.15	2	0	1	0	0	0	0.0318839
9653	2989.19	2	0	1	0	0	0	0.032113
9655	2989.22	2	0	1	0	0	0	0.0313177
9657	2989.25	2	0	1	0	0	0	0.0307739
9659	2989.29	2	0	1	0	0	0	0.0314751
9661	2989.32	2	0	1	0	0	0	0.0311685
9663	2989.35	2	0	1	0	0	0	0.0310822
9665	2989.39	2	0	1	0	0	0	0.0313962
9667	2989.42	2	0	1	0	0	0	0.0314876
9669	2989.45	2	0	1	0	0	0	0.031468
9671	2989.49	2	0	1	0	0	0	0.0313333
9673	2989.52	2	0	1	0	0	0	0.0318304
9675	2989.55	2	0	1	0	0	0	0.0315966
9677	2989.59	2	0	1	0	0	0	0.0311441
9679	2989.62	2	0	1	0	0	0	0.0312382
9681	2989.65	2	0	1	0	0	0	0.031581
9683	2989.69	2	0	1	0	0	0	0.0313306
9685	2989.72	2	0	1	0	0	0	0.0310395
9687	2989.75	2	0	1	0	0	0	0.0318122
9689	2989.79	2	0	1	0	0	0	0.0319035
9691	2989.82	2	0	1	0	0	0	0.0315929
9693	2989.85	2	0	1	0	0	0	0.0313566
9695	2989.89	2	0	1	0	0	0	0.031669
9697	2989.92	2	0	1	0	0	0	0.0321326
9699	2989.95	2	0	1	0	0	0	0.0321753
9701	2989.99	2	0	1	0	0	0	0.0325188
9703	2990.02	2	0	1	0	0	0	0.0324386
9705	2990.05	2	0	1	0	0	0	0.0330467
9707	2990.09	2	0	1	0	0	0	0.0333174
9709	2990.12	2	0	1	0	0	0	0.0335181
9711	2990.15	2	0	1	0	0	0	0.033222
9713	2990.19	2	0	1	0	0	0	0.0329093
9715	2990.22	2	0	1	0	0	0	0.0330531
9717	2990.25	2	0	1	0	0	0	0.0326264
9719	2990.29	2	0	1	0	0	0	0.0321722
9721	2990.32	2	0	1	0	0	0	0.0319123
9723	2990.35	2	0	1	0	0	0	0.0317309
9725	2990.39	2	0	1	0	0	0	0.0316446
9727	2990.42	2	0	1	0	0	0	0.0315824
9729	2990.45	2	0	1	0	0	0	0.0318968
9731	2990.49	2	0	1	0	0	0	0.0319123
9733	2990.52	2	0	1	0	0	0	0.0319932
9735	2990.55	2	0	1	0	0	0	0.0319421
9737	2990.59	2	0	1	0	0	0	0.0320017
9739	2990.62	2	0	1	0	0	0	0.0321225
9741	2990.65	2	0	1	0	0	0	0.0321296
9743	2990.69	2	0	1	0	0	0	0.0321323
9745	2990.72	2	0	1	0	0	0	0.0320578
9747	2990.75	2	0	1	0	0	0	0.0321485
9749	2990.79	2	0	1	0	0	0	0.0319692
9751	2990.82	2	0	1	0	0	0	0.0320071
9753	2990.85	2	0	1	0	0	0	0.032066
9755	2990.89	2	0	1	0	0	0	0.0320013
9757	2990.92	2	0	1	0	0	0	0.0320436
9759	2990.95	2	0	1	0	0	0	0.031932
9761	2990.99	2	0	1	0	0	0	0.0319776
9763	2991.02	2	0	1	0	0	0	0.0319594
9765	2991.05	2	0	1	0	0	0	0.0318737
9767	2991.09	2	0	1	0	0	0	0.0319265
9769	2991.12	2	0	1	0	0	0	0.0316964
9771	2991.15	2	0	1	0	0	0	0.0323631
9773	2991.19	2	0	1	0	0	0	0.0318778
9775	2991.22	2	0	1	0	0	0	0.0315539
9777	2991.25	2	0	1	0	0	0	0.0318206
9779	2991.29	2	0	1	0	0	0	0.031958
9781	2991.32	2	0	1	0	0	0	0.0319137
9783	2991.35	2	0	1	0	0	0	0.0315827
9785	2991.39	2	0	1	0	0	0	0.0320182
9787	2991.42	2	0	1	0	0	0	0.0320589
9789	2991.45	2	0	1	0	0	0	0.0320785
9791	2991.49	2	0	1	0	0	0	0.031627
9793	2991.52	2	0	1	0	0	0	0.0313346
9795	2991.55	2	0	1	0	0	0	0.0314785
9797	2991.59	2	0	1	0	0	0	0.0312277
9799	2991.62	2	0	1	0	0	0	0.0311245
9801	2991.65	2	0	1	0	0	0	0.0317387
9803	2991.69	2	0	1	0	0	0	0.0318328
9805	2991.72	2	0	1	0	0	0	0.031803
9807	2991.75	2	0	1	0	0	0	0.0314128
9809	2991.79	2	0	1	0	0	0	0.0314179
9811	2991.82	2	0	1	0	0	0	0.03125
9813	2991.85	2	0	1	0	0	0	0.0313648
9815	2991.89	2	0	1	0	0	0	0.0312923
9817	2991.92	2	0	1	0	0	0	0.0312879
9819	2991.95	2	0	1	0	0	0	0.0313925
9821	2991.99	2	0	1	0	0	0	0.0314463
9823	2992.02	2	0	1	0	0	0	0.0316453
9825	2992.05	2	0	1	0	0	0	0.031403
9827	2992.09	2	0	1	0	0	0	0.0314687
9829	2992.12	2	0	1	0	0	0	0.0313756
9831	2992.15	2	0	1	0	0	0	0.0313475
9833	2992.19	2	0	1	0	0	0	0.0313282
9835	2992.22	2	0	1	0	0	0	0.0311709
9837	2992.25	2	0	1	0	0	0	0.0313539
9839	2992.29	2	0	1	0	0	0	0.0310856
9841	2992.32	2	0	1	0	0	0	0.0311972
9843	2992.35	2	0	1	0	0	0	0.0311103
9845	2992.39	2	0	1	0	0	0	0.0310314
9847	2992.42	2	0	1	0	0	0	0.0311384
9849	2992.45	2	0	1	0	0	0	0.0310304
9851	2992.49	2	0	1	0	0	0	0.031181
9853	2992.52	2	0	1	0	0	0	0.0310128
9855	2992.55	2	0	1	0	0	0	0.0311417
9857	2992.59	2	0	1	0	0	0	0.0311194
9859	2992.62	2	0	1	0	0	0	0.0312169
9861	2992.65	2	0	1	0	0	0	0.0311363
9863	2992.69	2	0	1	0	0	0	0.0310551
9865	2992.72	2	0	1	0	0	0	0.0313678
9867	2992.75	2	0	1	0	0	0	0.0310216
9869	2992.79	2	0	1	0	0	0	0.0307817
9871	2992.82	2	0	1	0	0	0	0.0305282
9873	2992.85	2	0	1	0	0	0	0.0306328
9875	2992.89	2	0	1	0	0	0	0.0304284
9877	2992.92	2	0	1	0	0	0	0.0302064
9879	2992.95	2	0	1	0	0	0	0.0304189
9881	2992.99	2	0	1	0	0	0	0.0301191
9883	2993.02	2	0	1	0	0	0	0.0298009
9885	2993.05	2	0	1	0	0	0	0.0301966
9887	2993.09	2	0	1	0	0	0	0.0299004
9889	2993.12	2	0	1	0	0	0	0.0292057
9891	2993.15	2	0	1	0	0	0	0.0293072
9893	2993.19	2	0	1	0	0	0	0.0289651
9895	2993.22	2	0	1	0	0	0	0.0286398
9897	2993.25	2	0	1	0	0	0	0.0288635
9899	2993.29	2	0	1	0	0	0	0.0293756
9901	2993.32	2	0	1	0	0	0	0.0294717
9903	2993.35	2	0	1	0	0	0	0.0295597
9905	2993.39	2	0	1	0	0	0	0.0304967
9907	2993.42	2	0	1	0	0	0	0.0308206
9909	2993.45	2	0	1	0	0	0	0.0305404
9911	2993.49	2	0	1	0	0	0	0.0301989
9913	2993.52	2	0	1	0	0	0	0.030247
9915	2993.55	2	0	1	0	0	0	0.0311665
9917	2993.59	2	0	1	0	0	0	0.0314409
9919	2993.62	2	0	1	0	0	0	0.031091
9921	2993.65	2	0	1	0	0	0	0.0305807
9923	2993.69	2	0	1	0	0	0	0.030517
9925	2993.72	2	0	1	0	0	0	0.0304216
9927	2993.75	2	0	1	0	0	0	0.0304504
9929	2993.79	2	0	1	0	0	0	0.0302399
9931	2993.82	2	0	1	0	0	0	0.0303502
9933	2993.85	2	0	1	0	0	0	0.0303306
9935	2993.89	2	0	1	0	0	0	0.0304172
9937	2993.92	2	0	1	0	0	0	0.0303982
9939	2993.95	2	0	1	0	0	0	0.0302845
9941	2993.99	2	0	1	0	0	0	0.0303052
9943	2994.02	2	0	1	0	0	0	0.0302998
9945	2994.05	2	0	1	0	0	0	0.0304659
9947	2994.09	2	0	1	0	0	0	0.0304199
9949	2994.12	2	0	1	0	0	0	0.0304341
9951	2994.15	2	0	1	0	0	0	0.0304192
9953	2994.19	2	0	1	0	0	0	0.0304148
9955	2994.22	2	0	1	0	0	0	0.0304822
9957	2994.25	2	0	1	0	0	0	0.0304859
9959	2994.29	2	0	1	0	0	0	0.0306426
9961	2994.32	2	0	1	0	0	0	0.0306406
9963	2994.35	2	0	1	0	0	0	0.0307032
9965	2994.39	2	0	1	0	0	0	0.0306741
9967	2994.42	2	0	1	0	0	0	0.0305637
9969	2994.45	2	0	1	0	0	0	0.0306521
9971	2994.49	2	0	1	0	0	0	0.0306737
9973	2994.52	2	0	1	0	0	0	0.0306879
9975	2994.55	2	0	1	0	0	0	0.0305871
9977	2994.59	2	0	1	0	0	0	0.0305661
9979	2994.62	2	0	1	0	0	0	0.0306138
9981	2994.65	2	0	1	0	0	0	0.0306395
9983	2994.69	2	0	1	0	0	0	0.0307952
9985	2994.72	2	0	1	0	0	0	0.0307326
9987	2994.75	2	0	1	0	0	0	0.0308189
9989	2994.79	2	0	1	0	0	0	0.0307526
9991	2994.82	2	0	1	0	0	0	0.0306829
9993	2994.85	2	0	1	0	0	0	0.0306081
9995	2994.89	2	0	1	0	0	0	0.0307164
9997	2994.92	2	0	1	0	0	0	0.0309262
9999	2994.95	2	0	1	0	0	0	0.031933
10001	2994.99	2	0	1	0	0	0	0.0322876
10003	2995.02	2	0	1	0	0	0	0.0324419
10005	2995.05	2	0	1	0	0	0	0.0330024
10007	2995.09	2	0	1	0	0	0	0.032803
10009	2995.12	2	0	1	0	0	0	0.0329993
10011	2995.15	2	0	1	0	0	0	0.0328697
10013	2995.19	2	0	1	0	0	0	0.0329022
10015	2995.22	2	0	1	0	0	0	0.0323797
10017	2995.25	2	0	1	0	0	0	0.0317627
10019	2995.29	2	0	1	0	0	0	0.0319919
10021	2995.32	2	0	1	0	0	0	0.0313702
10023	2995.35	2	0	1	0	0	0	0.0314226
10025	2995.39	2	0	1	0	0	0	0.0316054
10027	2995.42	2	0	1	0	0	0	0.0311692
10029	2995.45	2	0	1	0	0	0	0.0311898
10031	2995.49	2	0	1	0	0	0	0.0312446
10033	2995.52	2	0	1	0	0	0	0.0309313
10035	2995.55	2	0	1	0	0	0	0.0308626
10037	2995.59	2	0	1	0	0	0	0.0310145
10039	2995.62	2	0	1	0	0	0	0.0313228
10041	2995.65	2	0	1	0	0	0	0.031511
10043	2995.69	2	0	1	0	0	0	0.0316984
10045	2995.72	2	0	1	0	0	0	0.0316727
10047	2995.75	2	0	1	0	0	0	0.0310643
10049	2995.79	2	0	1	0	0	0	0.0309238
10051	2995.82	2	0	1	0	0	0	0.0310805
10053	2995.85	2	0	1	0	0	0	0.0307032
10055	2995.89	2	0	1	0	0	0	0.0301035
10057	2995.92	2	0	1	0	0	0	0.0297888
10059	2995.95	2	0	1	0	0	0	0.0300101
10061	2995.99	2	0	1	0	0	0	0.0298155
10063	2996.02	2	0	1	0	0	0	0.0300121
10065	2996.05	2	0	1	0	0	0	0.0301617
10067	2996.09	2	0	1	0	0	0	0.0298206
10069	2996.12	2	0	1	0	0	0	0.0301373
10071	2996.15	2	0	1	0	0	0	0.0303164
10073	2996.19	2	0	1	0	0	0	0.0299965
10075	2996.22	2	0	1	0	0	0	0.0297532
10077	2996.25	2	0	1	0	0	0	0.0300554
10079	2996.29	2	0	1	0	0	0	0.0300744
10081	2996.32	2	0	1	0	0	0	0.0301559
10083	2996.35	2	0	1	0	0	0	0.0314311
10085	2996.39	2	0	1	0	0	0	0.0316622
10087	2996.42	2	0	1	0	0	0	0.0323421
10089	2996.45	2	0	1	0	0	0	0.0322514
10091	2996.49	2	0	1	0	0	0	0.0327073
10093	2996.52	2	0	1	0	0	0	0.0328271
10095	2996.55	2	0	1	0	0	0	0.033177
10097	2996.59	2	0	1	0	0	0	0.0328518
10099	2996.62	2	0	1	0	0	0	0.0325076
10101	2996.65	2	0	1	0	0	0	0.03211
10103	2996.69	2	0	1	0	0	0	0.0316132
10105	2996.72	2	0	1	0	0	0	0.0316822
10107	2996.75	2	0	1	0	0	0	0.0315039
10109	2996.79	2	0	1	0	0	0	0.0314399
10111	2996.82	2	0	1	0	0	0	0.0313353
10113	2996.85	2	0	1	0	0	0	0.0310896
10115	2996.89	2	0	1	0	0	0	0.0309593
10117	2996.92	2	0	1	0	0	0	0.0308006
10119	2996.95	2	0	1	0	0	0	0.0308839
10121	2996.99	2	0	1	0	0	0	0.0310138
10123	2997.02	2	0	1	0	0	0	0.0314714
10125	2997.05	2	0	1	0	0	0	0.0311729
10127	2997.09	2	0	1	0	0	0	0.0319979
10129	2997.12	2	0	1	0	0	0	0.0320023
10131	2997.15	2	0	1	0	0	0	0.0320426
10133	2997.19	2	0	1	0	0	0	0.031932
10135	2997.22	2	0	1	0	0	0	0.0315834
10137	2997.25	2	0	1	0	0	0	0.031272
10139	2997.29	2	0	1	0	0	0	0.0309384
10141	2997.32	2	0	1	0	0	0	0.0314355
10143	2997.35	2	0	1	0	0	0	0.0308917
10145	2997.39	2	0	1	0	0	0	0.0304246
10147	2997.42	2	0	1	0	0	0	0.0306734
10149	2997.45	2	0	1	0	0	0	0.031358
10151	2997.49	2	0	1	0	0	0	0.0317259
10153	2997.52	2	0	1	0	0	0	0.0319252
10155	2997.55	2	0	1	0	0	0	0.0322487
10157	2997.59	2	0	1	0	0	0	0.032423
10159	2997.62	2	0	1	0	0	0	0.0329787
10161	2997.65	2	0	1	0	0	0	0.0336257
10163	2997.69	2	0	1	0	0	0	0.0335164
10165	2997.72	2	0	1	0	0	0	0.0331726
10167	2997.75	2	0	1	0	0	0	0.0324829
10169	2997.79	2	0	1	0	0	0	0.0318423
10171	2997.82	2	0	1	0	0	0	0.0317607
10173	2997.85	2	0	1	0	0	0	0.031557
10175	2997.89	2	0	1	0	0	0	0.0322331
10177	2997.92	2	0	1	0	0	0	0.0327594
10179	2997.95	2	0	1	0	0	0	0.0333147
10181	2997.99	2	0	1	0	0	0	0.0329469
10183	2998.02	2	0	1	0	0	0	0.0330501
10185	2998.05	2	0	1	0	0	0	0.0331492
10187	2998.09	2	0	1	0	0	0	0.0330203
10189	2998.12	2	0	1	0	0	0	0.0333032
10191	2998.15	2	0	1	0	0	0	0.0334146
10193	2998.19	2	0	1	0	0	0	0.0334646
10195	2998.22	2	0	1	0	0	0	0.0333371
10197	2998.25	2	0	1	0	0	0	0.032936
10199	2998.29	2	0	1	0	0	0	0.0333381
10201	2998.32	2	0	1	0	0	0	0.0334521
10203	2998.35	2	0	1	0	0	0	0.0328602
10205	2998.39	2	0	1	0	0	0	0.0326633
10207	2998.42	2	0	1	0	0	0	0.0338027
10209	2998.45	2	0	1	0	0	0	0.034486
10211	2998.49	2	0	1	0	0	0	0.0337553
10213	2998.52	2	0	1	0	0	0	0.0330954
10215	2998.55	2	0	1	0	0	0	0.0328386
10217	2998.59	2	0	1	0	0	0	0.0332379
10219	2998.62	2	0	1	0	0	0	0.033754
10221	2998.65	2	0	1	0	0	0	0.0331743
10223	2998.69	2	0	1	0	0	0	0.0330074
10225	2998.72	2	0	1	0	0	0	0.0331506
10227	2998.75	2	0	1	0	0	0	0.0335706
10229	2998.79	2	0	1	0	0	0	0.0331425
10231	2998.82	2	0	1	0	0	0	0.0334183
10233	2998.85	2	0	1	0	0	0	0.0328558
10235	2998.89	2	0	1	0	0	0	0.0326244
10237	2998.92	2	0	1	0	0	0	0.0330765
10239	2998.95	2	0	1	0	0	0	0.0333648
10241	2998.99	2	0	1	0	0	0	0.0335553
10243	2999.02	2	0	1	0	0	0	0.0337564
10245	2999.05	2	0	1	0	0	0	0.0331577
10247	2999.09	2	0	1	0	0	0	0.0327059
10249	2999.12	2	0	1	0	0	0	0.032447
10251	2999.15	2	0	1	0	0	0	0.0323093
10253	2999.19	2	0	1	0	0	0	0.0323743
10255	2999.22	2	0	1	0	0	0	0.0326216
10257	2999.25	2	0	1	0	0	0	0.0325773
10259	2999.29	2	0	1	0	0	0	0.0322233
10261	2999.32	2	0	1	0	0	0	0.0321956
10263	2999.35	2	0	1	0	0	0	0.0323499
10265	2999.39	2	0	1	0	0	0	0.0326298
10267	2999.42	2	0	1	0	0	0	0.0334244
10269	2999.45	2	0	1	0	0	0	0.0324704
10271	2999.49	2	0	1	0	0	0	0.0325641
10273	2999.52	2	0	1	0	0	0	0.0330037
10275	2999.55	2	0	1	0	0	0	0.0321496
10277	2999.59	2	0	1	0	0	0	0.0324521
10279	2999.62	2	0	1	0	0	0	0.0326887
10281	2999.65	2	0	1	0	0	0	0.0324717
10283	2999.69	2	0	1	0	0	0	0.0333225
10285	2999.72	2	0	1	0	0	0	0.0335672
10287	2999.75	2	0	1	0	0	0	0.0332196
10289	2999.79	2	0	1	0	0	0	0.0319597
10291	2999.82	2	0	1	0	0	0	0.0323597
10293	2999.85	2	0	1	0	0	0	0.03269
10295	2999.89	2	0	1	0	0	0	0.0324375
10297	2999.92	2	0	1	0	0	0	0.0321062
10299	2999.95	2	0	1	0	0	0	0.0320941
10301	2999.99	2	0	1	0	0	0	0.0329137
10303	3000.02	2	0	1	0	0	0	0.0325932
10305	3000.05	2	0	1	0	0	0	0.0320521
10307	3000.09	2	0	1	0	0	0	0.0321553
10309	3000.12	2	0	1	0	0	0	0.0322504
10311	3000.15	2	0	1	0	0	0	0.0315851
10313	3000.18	2	0	1	0	0	0	0.031782
10315	3000.22	2	0	1	0	0	0	0.0320379
10317	3000.25	2	0	1	0	0	0	0.0318355
10319	3000.28	2	0	1	0	0	0	0.0322358
10321	3000.32	2	0	1	0	0	0	0.0327909
10323	3000.35	2	0	1	0	0	0	0.0322673
10325	3000.38	2	0	1	0	0	0	0.0318765
10327	3000.42	2	0	1	0	0	0	0.0321431
10329	3000.45	2	0	1	0	0	0	0.0319204
10331	3000.48	2	0	1	0	0	0	0.0311038
10333	3000.52	2	0	1	0	0	0	0.0317607
10335	3000.55	2	0	1	0	0	0	0.0316656
10337	3000.58	2	0	1	0	0	0	0.0317242
10339	3000.62	2	0	1	0	0	0	0.0313099
10341	3000.65	2	0	1	0	0	0	0.0309824
10343	3000.68	2	0	1	0	0	0	0.030271
10345	3000.72	2	0	1	0	0	0	0.0301421
10347	3000.75	2	0	1	0	0	0	0.0301996
10349	3000.78	2	0	1	0	0	0	0.0298043
10351	3000.82	2	0	1	0	0	0	0.0305238
10353	3000.85	2	0	1	0	0	0	0.029826
10355	3000.88	2	0	1	0	0	0	0.0301062
10357	3000.92	2	0	1	0	0	0	0.0301915
10359	3000.95	2	0	1	0	0	0	0.029892
10361	3000.98	2	0	1	0	0	0	0.0304466
10363	3001.02	2	0	1	0	0	0	0.0302812
10365	3001.05	2	0	1	0	0	0	0.030026
10367	3001.08	2	0	1	0	0	0	0.0301059
10369	3001.12	2	0	1	0	0	0	0.0300845
10371	3001.15	2	0	1	0	0	0	0.0319692
10373	3001.18	2	0	1	0	0	0	0.0321661
10375	3001.22	2	0	1	0	0	0	0.031561
10377	3001.25	2	0	1	0	0	0	0.0328528
10379	3001.28	2	0	1	0	0	0	0.0319732
10381	3001.32	2	0	1	0	0	0	0.0317709
10383	3001.35	2	0	1	0	0	0	0.0327963
10385	3001.38	2	0	1	0	0	0	0.032469
10387	3001.42	2	0	1	0	0	0	0.0314907
10389	3001.45	2	0	1	0	0	0	0.0328626
10391	3001.48	2	0	1	0	0	0	0.031826
10393	3001.52	2	0	1	0	0	0	0.0312639
10395	3001.55	2	0	1	0	0	0	0.031382
10397	3001.58	2	0	1	0	0	0	0.0319935
10399	3001.62	2	0	1	0	0	0	0.0314819
10401	3001.65	2	0	1	0	0	0	0.0308761
10403	3001.68	2	0	1	0	0	0	0.0313116
10405	3001.72	2	0	1	0	0	0	0.0311678
10407	3001.75	2	0	1	0	0	0	0.0309133
10409	3001.78	2	0	1	0	0	0	0.0309147
10411	3001.82	2	0	1	0	0	0	0.0311688
10413	3001.85	2	0	1	0	0	0	0.0312612
10415	3001.88	2	0	1	0	0	0	0.0312744
10417	3001.92	2	0	1	0	0	0	0.0317942
10419	3001.95	2	0	1	0	0	0	0.0308639
10421	3001.98	2	0	1	0	0	0	0.0309901
10423	3002.02	2	0	1	0	0	0	0.0309177
10425	3002.05	2	0	1	0	0	0	0.0309049
10427	3002.08	2	0	1	0	0	0	0.0316673
10429	3002.12	2	0	1	0	0	0	0.0310646
10431	3002.15	2	0	1	0	0	0	0.0316727
10433	3002.18	2	0	1	0	0	0	0.03167
10435	3002.22	2	0	1	0	0	0	0.0308893
10437	3002.25	2	0	1	0	0	0	0.0306994
10439	3002.28	2	0	1	0	0	0	0.03118
10441	3002.32	2	0	1	0	0	0	0.0321086
10443	3002.35	2	0	1	0	0	0	0.0314697
10445	3002.38	2	0	1	0	0	0	0.0325557
10447	3002.42	2	0	1	0	0	0	0.0315577
10449	3002.45	2	0	1	0	0	0	0.0314819
10451	3002.48	2	0	1	0	0	0	0.0319032
10453	3002.52	2	0	1	0	0	0	0.0318443
10455	3002.55	2	0	1	0	0	0	0.0322758
10457	3002.58	2	0	1	0	0	0	0.0320257
10459	3002.62	2	0	1	0	0	0	0.0310236
10461	3002.65	2	0	1	0	0	0	0.0320308
10463	3002.68	2	0	1	0	0	0	0.0318704
10465	3002.72	2	0	1	0	0	0	0.0315404
10467	3002.75	2	0	1	0	0	0	0.0317353
10469	3002.78	2	0	1	0	0	0	0.031847
10471	3002.82	2	0	1	0	0	0	0.0320111
10473	3002.85	2	0	1	0	0	0	0.031426
10475	3002.88	2	0	1	0	0	0	0.0314484
10477	3002.92	2	0	1	0	0	0	0.0315736
10479	3002.95	2	0	1	0	0	0	0.0318687
10481	3002.98	2	0	1	0	0	0	0.0312162
10483	3003.02	2	0	1	0	0	0	0.0318105
10485	3003.05	2	0	1	0	0	0	0.0312023
10487	3003.08	2	0	1	0	0	0	0.0307708
10489	3003.12	2	0	1	0	0	0	0.0310731
10491	3003.15	2	0	1	0	0	0	0.0313066
10493	3003.18	2	0	1	0	0	0	0.0316467
10495	3003.22	2	0	1	0	0	0	0.0314714
10497	3003.25	2	0	1	0	0	0	0.0315939
10499	3003.28	2	0	1	0	0	0	0.0313011
10501	3003.32	2	0	1	0	0	0	0.031359
10503	3003.35	2	0	1	0	0	0	0.0318301
10505	3003.38	2	0	1	0	0	0	0.0321939
10507	3003.42	2	0	1	0	0	0	0.0324
10509	3003.45	2	0	1	0	0	0	0.0322612
10511	3003.48	2	0	1	0	0	0	0.0325733
10513	3003.52	2	0	1	0	0	0	0.032887
10515	3003.55	2	0	1	0	0	0	0.0331584
10517	3003.58	2	0	1	0	0	0	0.0325482
10519	3003.62	2	0	1	0	0	0	0.0324978
10521	3003.65	2	0	1	0	0	0	0.0323868
10523	3003.68	2	0	1	0	0	0	0.0320494
10525	3003.72	2	0	1	0	0	0	0.0312162
10527	3003.75	2	0	1	0	0	0	0.0317556
10529	3003.78	2	0	1	0	0	0	0.0318047
10531	3003.82	2	0	1	0	0	0	0.0316984
10533	3003.85	2	0	1	0	0	0	0.0316673
10535	3003.88	2	0	1	0	0	0	0.0316903
10537	3003.92	2	0	1	0	0	0	0.0311099
10539	3003.95	2	0	1	0	0	0	0.0313834
10541	3003.98	2	0	1	0	0	0	0.0311147
10543	3004.02	2	0	1	0	0	0	0.0302253
10545	3004.05	2	0	1	0	0	0	0.0306213
10547	3004.08	2	0	1	0	0	0	0.0311793
10549	3004.12	2	0	1	0	0	0	0.0313394
10551	3004.15	2	0	1	0	0	0	0.031182
10553	3004.18	2	0	1	0	0	0	0.0313962
10555	3004.22	2	0	1	0	0	0	0.0314074
10557	3004.25	2	0	1	0	0	0	0.0313556
10559	3004.28	2	0	1	0	0	0	0.0314402
10561	3004.32	2	0	1	0	0	0	0.0313235
10563	3004.35	2	0	1	0	0	0	0.0312873
10565	3004.38	2	0	1	0	0	0	0.0310531
10567	3004.42	2	0	1	0	0	0	0.0310947
10569	3004.45	2	0	1	0	0	0	0.031311
10571	3004.48	2	0	1	0	0	0	0.0308676
10573	3004.52	2	0	1	0	0	0	0.0310541
10575	3004.55	2	0	1	0	0	0	0.0311468
10577	3004.58	2	0	1	0	0	0	0.0309143
10579	3004.62	2	0	1	0	0	0	0.0310676
10581	3004.65	2	0	1	0	0	0	0.0306524
10583	3004.68	2	0	1	0	0	0	0.0306111
10585	3004.72	2	0	1	0	0	0	0.0305529
10587	3004.75	2	0	1	0	0	0	0.0306585
10589	3004.78	2	0	1	0	0	0	0.0301759
10591	3004.82	2	0	1	0	0	0	0.0291745
10593	3004.85	2	0	1	0	0	0	0.0297654
10595	3004.88	2	0	1	0	0	0	0.0285261
10597	3004.92	2	0	1	0	0	0	0.0282273
10599	3004.95	2	0	1	0	0	0	0.0299759
10601	3004.98	2	0	1	0	0	0	0.030118
10603	3005.02	2	0	1	0	0	0	0.0298974
10605	3005.05	2	0	1	0	0	0	0.0304223
10607	3005.08	2	0	1	0	0	0	0.0307576
10609	3005.12	2	0	1	0	0	0	0.0308879
10611	3005.15	2	0	1	0	0	0	0.0318541
10613	3005.18	2	0	1	0	0	0	0.0315458
10615	3005.22	2	0	1	0	0	0	0.0317753
10617	3005.25	2	0	1	0	0	0	0.0311556
10619	3005.28	2	0	1	0	0	0	0.0299746
10621	3005.32	2	0	1	0	0	0	0.0305878
10623	3005.35	2	0	1	0	0	0	0.0309702
10625	3005.38	2	0	1	0	0	0	0.0314934
10627	3005.42	2	0	1	0	0	0	0.0314013
10629	3005.45	2	0	1	0	0	0	0.0315157
10631	3005.48	2	0	1	0	0	0	0.0312176
10633	3005.52	2	0	1	0	0	0	0.0308318
10635	3005.55	2	0	1	0	0	0	0.0309059
10637	3005.58	2	0	1	0	0	0	0.030823
10639	3005.62	2	0	1	0	0	0	0.0308263
10641	3005.65	2	0	1	0	0	0	0.0303773
10643	3005.68	2	0	1	0	0	0	0.0303982
10645	3005.72	2	0	1	0	0	0	0.0303103
10647	3005.75	2	0	1	0	0	0	0.0303766
10649	3005.78	2	0	1	0	0	0	0.0302145
10651	3005.82	2	0	1	0	0	0	0.0303194
10653	3005.85	2	0	1	0	0	0	0.0302795
10655	3005.88	2	0	1	0	0	0	0.0302135
10657	3005.92	2	0	1	0	0	0	0.0301911
10659	3005.95	2	0	1	0	0	0	0.03016
10661	3005.98	2	0	1	0	0	0	0.0303444
10663	3006.02	2	0	1	0	0	0	0.0304077
10665	3006.05	2	0	1	0	0	0	0.0304998
10667	3006.08	2	0	1	0	0	0	0.0301901
10669	3006.12	2	0	1	0	0	0	0.0302998
10671	3006.15	2	0	1	0	0	0	0.0304879
10673	3006.18	2	0	1	0	0	0	0.0302402
10675	3006.22	2	0	1	0	0	0	0.0301806
10677	3006.25	2	0	1	0	0	0	0.029941
10679	3006.28	2	0	1	0	0	0	0.0300399
10681	3006.32	2	0	1	0	0	0	0.0301103
10683	3006.35	2	0	1	0	0	0	0.0301367
10685	3006.38	2	0	1	0	0	0	0.0302257
10687	3006.42	2	0	1	0	0	0	0.0300771
10689	3006.45	2	0	1	0	0	0	0.0300517
10691	3006.48	2	0	1	0	0	0	0.030092
10693	3006.52	2	0	1	0	0	0	0.0301438
10695	3006.55	2	0	1	0	0	0	0.0301867
10697	3006.58	2	0	1	0	0	0	0.0298903
10699	3006.62	2	0	1	0	0	0	0.0299502
10701	3006.65	2	0	1	0	0	0	0.0300839
10703	3006.68	2	0	1	0	0	0	0.0301025
10705	3006.72	2	0	1	0	0	0	0.0299421
10707	3006.75	2	0	1	0	0	0	0.0297072
10709	3006.78	2	0	1	0	0	0	0.0292375
10711	3006.82	2	0	1	0	0	0	0.0297637
10713	3006.85	2	0	1	0	0	0	0.0303021
10715	3006.88	2	0	1	0	0	0	0.0302135
10717	3006.92	2	0	1	0	0	0	0.0297102
10719	3006.95	2	0	1	0	0	0	0.0302047
10721	3006.98	2	0	1	0	0	0	0.0300405
10723	3007.02	2	0	1	0	0	0	0.0308859
10725	3007.05	2	0	1	0	0	0	0.0311279
10727	3007.08	2	0	1	0	0	0	0.0307448
10729	3007.12	2	0	1	0	0	0	0.030782
10731	3007.15	2	0	1	0	0	0	0.0310477
10733	3007.18	2	0	1	0	0	0	0.0314538
10735	3007.22	2	0	1	0	0	0	0.0318006
10737	3007.25	2	0	1	0	0	0	0.0319776
10739	3007.28	2	0	1	0	0	0	0.0312507
10741	3007.32	2	0	1	0	0	0	0.0309549
10743	3007.35	2	0	1	0	0	0	0.0298957
10745	3007.38	2	0	1	0	0	0	0.0295915
10747	3007.42	2	0	1	0	0	0	0.0303133
10749	3007.45	2	0	1	0	0	0	0.0308104
10751	3007.48	2	0	1	0	0	0	0.0307637
10753	3007.52	2	0	1	0	0	0	0.0301448
10755	3007.55	2	0	1	0	0	0	0.0299969
10757	3007.58	2	0	1	0	0	0	0.0297438
10759	3007.62	2	0	1	0	0	0	0.0298006
10761	3007.65	2	0	1	0	0	0	0.0299539
10763	3007.68	2	0	1	0	0	0	0.0295309
10765	3007.72	2	0	1	0	0	0	0.029248
10767	3007.75	2	0	1	0	0	0	0.0299153
10769	3007.78	2	0	1	0	0	0	0.030606
10771	3007.82	2	0	1	0	0	0	0.0303515
10773	3007.85	2	0	1	0	0	0	0.0304805
10775	3007.88	2	0	1	0	0	0	0.0305546
10777	3007.92	2	0	1	0	0	0	0.030426
10779	3007.95	2	0	1	0	0	0	0.0303634
10781	3007.98	2	0	1	0	0	0	0.0299465
10783	3008.02	2	0	1	0	0	0	0.029561
10785	3008.05	2	0	1	0	0	0	0.0295021
10787	3008.08	2	0	1	0	0	0	0.0295465
10789	3008.12	2	0	1	0	0	0	0.0296591
10791	3008.15	2	0	1	0	0	0	0.0293475
10793	3008.18	2	0	1	0	0	0	0.0293684
10795	3008.22	2	0	1	0	0	0	0.0294815
10797	3008.25	2	0	1	0	0	0	0.029586
10799	3008.28	2	0	1	0	0	0	0.0297221
10801	3008.32	2	0	1	0	0	0	0.0294578
10803	3008.35	2	0	1	0	0	0	0.0294077
10805	3008.38	2	0	1	0	0	0	0.0298263
10807	3008.42	2	0	1	0	0	0	0.0297268
10809	3008.45	2	0	1	0	0	0	0.0297245
10811	3008.48	2	0	1	0	0	0	0.0299289
10813	3008.52	2	0	1	0	0	0	0.0294412
10815	3008.55	2	0	1	0	0	0	0.0293566
10817	3008.58	2	0	1	0	0	0	0.0296551
10819	3008.62	2	0	1	0	0	0	0.0299075
10821	3008.65	2	0	1	0	0	0	0.0300933
10823	3008.68	2	0	1	0	0	0	0.0302246
10825	3008.72	2	0	1	0	0	0	0.0302223
10827	3008.75	2	0	1	0	0	0	0.029381
10829	3008.78	2	0	1	0	0	0	0.029514
10831	3008.82	2	0	1	0	0	0	0.0297641
10833	3008.85	2	0	1	0	0	0	0.030246
10835	3008.88	2	0	1	0	0	0	0.0310084
10837	3008.92	2	0	1	0	0	0	0.0311621
10839	3008.95	2	0	1	0	0	0	0.0315069
10841	3008.98	2	0	1	0	0	0	0.0314602
10843	3009.02	2	0	1	0	0	0	0.0315773
10845	3009.05	2	0	1	0	0	0	0.0311292
10847	3009.08	2	0	1	0	0	0	0.0302656
10849	3009.12	2	0	1	0	0	0	0.0299586
10851	3009.15	2	0	1	0	0	0	0.0302791
10853	3009.18	2	0	1	0	0	0	0.0299661
10855	3009.22	2	0	1	0	0	0	0.0297566
10857	3009.25	2	0	1	0	0	0	0.0290493
10859	3009.28	2	0	1	0	0	0	0.0293072
10861	3009.32	2	0	1	0	0	0	0.0297563
10863	3009.35	2	0	1	0	0	0	0.0297427
10865	3009.38	2	0	1	0	0	0	0.0295187
10867	3009.42	2	0	1	0	0	0	0.0301404
10869	3009.45	2	0	1	0	0	0	0.0301505
10871	3009.48	2	0	1	0	0	0	0.0291278
10873	3009.52	2	0	1	0	0	0	0.0301004
10875	3009.55	2	0	1	0	0	0	0.0300754
10877	3009.58	2	0	1	0	0	0	0.0301867
10879	3009.62	2	0	1	0	0	0	0.0305231
10881	3009.65	2	0	1	0	0	0	0.0311302
10883	3009.68	2	0	1	0	0	0	0.0309864
10885	3009.72	2	0	1	0	0	0	0.0305356
10887	3009.75	2	0	1	0	0	0	0.030604
10889	3009.78	2	0	1	0	0	0	0.0297871
10891	3009.82	2	0	1	0	0	0	0.0295001
10893	3009.85	2	0	1	0	0	0	0.0293644
10895	3009.88	2	0	1	0	0	0	0.0296358
10897	3009.92	2	0	1	0	0	0	0.030092
10899	3009.95	2	0	1	0	0	0	0.030206
10901	3009.98	2	0	1	0	0	0	0.0311008
10903	3010.02	2	0	1	0	0	0	0.0313834
10905	3010.05	2	0	1	0	0	0	0.0306406
10907	3010.08	2	0	1	0	0	0	0.0302365
10909	3010.12	2	0	1	0	0	0	0.0300632
10911	3010.15	2	0	1	0	0	0	0.0311401
10913	3010.18	2	0	1	0	0	0	0.0313248
10915	3010.22	2	0	1	0	0	0	0.0305658
10917	3010.25	2	0	1	0	0	0	0.0299949
10919	3010.28	2	0	1	0	0	0	0.0304815
10921	3010.32	2	0	1	0	0	0	0.0296984
10923	3010.35	2	0	1	0	0	0	0.0303187
10925	3010.38	2	0	1	0	0	0	0.0302774
10927	3010.42	2	0	1	0	0	0	0.0300798
10929	3010.45	2	0	1	0	0	0	0.0297945
10931	3010.48	2	0	1	0	0	0	0.0297451
10933	3010.52	2	0	1	0	0	0	0.029738
10935	3010.55	2	0	1	0	0	0	0.030091
10937	3010.58	2	0	1	0	0	0	0.0300724
10939	3010.62	2	0	1	0	0	0	0.0307015
10941	3010.65	2	0	1	0	0	0	0.0298476
10943	3010.68	2	0	1	0	0	0	0.0301008
10945	3010.72	2	0	1	0	0	0	0.0301725
10947	3010.75	2	0	1	0	0	0	0.0302219
10949	3010.78	2	0	1	0	0	0	0.0306054
10951	3010.82	2	0	1	0	0	0	0.0302037
10953	3010.85	2	0	1	0	0	0	0.0295488
10955	3010.88	2	0	1	0	0	0	0.0291146
10957	3010.92	2	0	1	0	0	0	0.0289722
10959	3010.95	2	0	1	0	0	0	0.028871
10961	3010.98	2	0	1	0	0	0	0.0291813
10963	3011.02	2	0	1	0	0	0	0.0292805
10965	3011.05	2	0	1	0	0	0	0.0299065
10967	3011.08	2	0	1	0	0	0	0.0295349
10969	3011.12	2	0	1	0	0	0	0.0297647
10971	3011.15	2	0	1	0	0	0	0.0293268
10973	3011.18	2	0	1	0	0	0	0.0284974
10975	3011.22	2	0	1	0	0	0	0.0292981
10977	3011.25	2	0	1	0	0	0	0.0298649
10979	3011.28	2	0	1	0	0	0	0.0299414
10981	3011.32	2	0	1	0	0	0	0.029715
10983	3011.35	2	0	1	0	0	0	0.0299174
10985	3011.38	2	0	1	0	0	0	0.0298368
10987	3011.42	2	0	1	0	0	0	0.0296984
10989	3011.45	2	0	1	0	0	0	0.03009
10991	3011.48	2	0	1	0	0	0	0.0295184
10993	3011.52	2	0	1	0	0	0	0.0286446
10995	3011.55	2	0	1	0	0	0	0.0286622
10997	3011.58	2	0	1	0	0	0	0.0293976
10999	3011.62	2	0	1	0	0	0	0.0295729
11001	3011.65	2	0	1	0	0	0	0.0295918
11003	3011.68	2	0	1	0	0	0	0.0294003
11005	3011.72	2	0	1	0	0	0	0.029426
11007	3011.75	2	0	1	0	0	0	0.0292761
11009	3011.78	2	0	1	0	0	0	0.0293404
11011	3011.82	2	0	1	0	0	0	0.028763
11013	3011.85	2	0	1	0	0	0	0.0290057
11015	3011.88	2	0	1	0	0	0	0.0291742
11017	3011.92	2	0	1	0	0	0	0.0288002
11019	3011.95	2	0	1	0	0	0	0.0290131
11021	3011.98	2	0	1	0	0	0	0.0291586
11023	3012.02	2	0	1	0	0	0	0.0293915
11025	3012.05	2	0	1	0	0	0	0.0289052
11027	3012.08	2	0	1	0	0	0	0.0290629
11029	3012.12	2	0	1	0	0	0	0.0291248
11031	3012.15	2	0	1	0	0	0	0.0294097
11033	3012.18	2	0	1	0	0	0	0.0287688
11035	3012.22	2	0	1	0	0	0	0.0282781
11037	3012.25	2	0	1	0	0	0	0.0289722
11039	3012.28	2	0	1	0	0	0	0.0291708
11041	3012.32	2	0	1	0	0	0	0.0295769
11043	3012.35	2	0	1	0	0	0	0.0289228
11045	3012.38	2	0	1	0	0	0	0.0283772
11047	3012.42	2	0	1	0	0	0	0.0287904
11049	3012.45	2	0	1	0	0	0	0.0290003
11051	3012.48	2	0	1	0	0	0	0.0292605
11053	3012.52	2	0	1	0	0	0	0.0290798
11055	3012.55	2	0	1	0	0	0	0.028139
11057	3012.58	2	0	1	0	0	0	0.0278567
11059	3012.62	2	0	1	0	0	0	0.0285112
11061	3012.65	2	0	1	0	0	0	0.0287346
11063	3012.68	2	0	1	0	0	0	0.0289789
11065	3012.72	2	0	1	0	0	0	0.0278798
11067	3012.75	2	0	1	0	0	0	0.0272036
11069	3012.78	2	0	1	0	0	0	0.0276696
11071	3012.82	2	0	1	0	0	0	0.0284368
11073	3012.85	2	0	1	0	0	0	0.0285346
11075	3012.88	2	0	1	0	0	0	0.0288615
11077	3012.92	2	0	1	0	0	0	0.0284503
11079	3012.95	2	0	1	0	0	0	0.0287322
11081	3012.98	2	0	1	0	0	0	0.0287552
11083	3013.02	2	0	1	0	0	0	0.0290821
11085	3013.05	2	0	1	0	0	0	0.0286723
11087	3013.08	2	0	1	0	0	0	0.028918
11089	3013.12	2	0	1	0	0	0	0.0291573
11091	3013.15	2	0	1	0	0	0	0.028739
11093	3013.18	2	0	1	0	0	0	0.0289343
11095	3013.22	2	0	1	0	0	0	0.0292659
11097	3013.25	2	0	1	0	0	0	0.0288046
11099	3013.28	2	0	1	0	0	0	0.0284943
11101	3013.32	2	0	1	0	0	0	0.0286947
11103	3013.35	2	0	1	0	0	0	0.0287461
11105	3013.38	2	0	1	0	0	0	0.0284023
11107	3013.42	2	0	1	0	0	0	0.0280733
11109	3013.45	2	0	1	0	0	0	0.0286148
11111	3013.48	2	0	1	0	0	0	0.028515
11113	3013.52	2	0	1	0	0	0	0.0277576
11115	3013.55	2	0	1	0	0	0	0.0282886
[truncated: 34,158 more rows]

## Sheet: Mouse 1_Event Trials
3250.641664	Down	25341	40450181.5936	11:14:10.1815936

## Sheet: Mouse 2_415 Signal
FrameCounter	Timestamp	LedState	Stimulation	Output0	Output1	Input0	Input1	Region0G
7108	4773.47	1	0	1	0	0	0	0.0103569
7110	4773.5	1	0	1	0	0	0	0.0103447
7112	4773.53	1	0	1	0	0	0	0.0103569
7114	4773.57	1	0	1	0	0	0	0.0103217
7116	4773.6	1	0	1	0	0	0	0.0103789
7118	4773.63	1	0	1	0	0	0	0.0104063
7120	4773.67	1	0	1	0	0	0	0.010388
7122	4773.7	1	0	1	0	0	0	0.0104022
7124	4773.73	1	0	1	0	0	0	0.0103572
7126	4773.77	1	0	1	0	0	0	0.0103897
7128	4773.8	1	0	1	0	0	0	0.0103684
7130	4773.83	1	0	1	0	0	0	0.0103816
7132	4773.87	1	0	1	0	0	0	0.0103461
7134	4773.9	1	0	1	0	0	0	0.0103789
7136	4773.93	1	0	1	0	0	0	0.0103931
7138	4773.97	1	0	1	0	0	0	0.0104171
7140	4774	1	0	1	0	0	0	0.0104019
7142	4774.03	1	0	1	0	0	0	0.0103681
7144	4774.07	1	0	1	0	0	0	0.010433
7146	4774.1	1	0	1	0	0	0	0.01043
7148	4774.13	1	0	1	0	0	0	0.0104354
7150	4774.17	1	0	1	0	0	0	0.0103955
7152	4774.2	1	0	1	0	0	0	0.0103904
7154	4774.23	1	0	1	0	0	0	0.0103863
7156	4774.27	1	0	1	0	0	0	0.0103914
7158	4774.3	1	0	1	0	0	0	0.0104198
7160	4774.33	1	0	1	0	0	0	0.0103765
7162	4774.37	1	0	1	0	0	0	0.010345
7164	4774.4	1	0	1	0	0	0	0.0103742
7166	4774.43	1	0	1	0	0	0	0.0103955
7168	4774.47	1	0	1	0	0	0	0.0103938
7170	4774.5	1	0	1	0	0	0	0.010384
7172	4774.53	1	0	1	0	0	0	0.0104039
7174	4774.57	1	0	1	0	0	0	0.0103386
7176	4774.6	1	0	1	0	0	0	0.0103525
7178	4774.63	1	0	1	0	0	0	0.0103799
7180	4774.67	1	0	1	0	0	0	0.0103576
7182	4774.7	1	0	1	0	0	0	0.010367
7184	4774.73	1	0	1	0	0	0	0.010361
7186	4774.77	1	0	1	0	0	0	0.0104124
7188	4774.8	1	0	1	0	0	0	0.0104127
7190	4774.83	1	0	1	0	0	0	0.0103965
7192	4774.87	1	0	1	0	0	0	0.0103853
7194	4774.9	1	0	1	0	0	0	0.0103427
7196	4774.93	1	0	1	0	0	0	0.0103396
7198	4774.97	1	0	1	0	0	0	0.0104259
7200	4775	1	0	1	0	0	0	0.0103745
7202	4775.03	1	0	1	0	0	0	0.0103488
7204	4775.07	1	0	1	0	0	0	0.0103379
7206	4775.1	1	0	1	0	0	0	0.0103437
7208	4775.13	1	0	1	0	0	0	0.0103176
7210	4775.17	1	0	1	0	0	0	0.0103535
7212	4775.2	1	0	1	0	0	0	0.0103342
7214	4775.23	1	0	1	0	0	0	0.010319
7216	4775.27	1	0	1	0	0	0	0.0103319
7218	4775.3	1	0	1	0	0	0	0.0103474
7220	4775.33	1	0	1	0	0	0	0.0103478
7222	4775.37	1	0	1	0	0	0	0.0104232
7224	4775.4	1	0	1	0	0	0	0.0103434
7226	4775.43	1	0	1	0	0	0	0.0103934
7228	4775.47	1	0	1	0	0	0	0.0103626
7230	4775.5	1	0	1	0	0	0	0.0103704
7232	4775.53	1	0	1	0	0	0	0.0103593
7234	4775.57	1	0	1	0	0	0	0.0103674
7236	4775.6	1	0	1	0	0	0	0.0103819
7238	4775.63	1	0	1	0	0	0	0.010363
7240	4775.67	1	0	1	0	0	0	0.0103904
7242	4775.7	1	0	1	0	0	0	0.0103738
7244	4775.73	1	0	1	0	0	0	0.0103132
7246	4775.77	1	0	1	0	0	0	0.0104063
7248	4775.8	1	0	1	0	0	0	0.0103491
7250	4775.83	1	0	1	0	0	0	0.010361
7252	4775.87	1	0	1	0	0	0	0.0103528
7254	4775.9	1	0	1	0	0	0	0.0103271
7256	4775.93	1	0	1	0	0	0	0.0103481
7258	4775.97	1	0	1	0	0	0	0.0103359
7260	4776	1	0	1	0	0	0	0.0103285
7262	4776.03	1	0	1	0	0	0	0.0103782
7264	4776.07	1	0	1	0	0	0	0.0103498
7266	4776.1	1	0	1	0	0	0	0.0103298
7268	4776.13	1	0	1	0	0	0	0.0103156
7270	4776.17	1	0	1	0	0	0	0.0103786
7272	4776.2	1	0	1	0	0	0	0.0103383
7274	4776.23	1	0	1	0	0	0	0.0103566
7276	4776.27	1	0	1	0	0	0	0.0103667
7278	4776.3	1	0	1	0	0	0	0.0103921
7280	4776.33	1	0	1	0	0	0	0.0103515
7282	4776.37	1	0	1	0	0	0	0.0103322
7284	4776.4	1	0	1	0	0	0	0.0103633
7286	4776.43	1	0	1	0	0	0	0.010365
7288	4776.47	1	0	1	0	0	0	0.0103457
7290	4776.5	1	0	1	0	0	0	0.0104141
7292	4776.53	1	0	1	0	0	0	0.0103373
7294	4776.57	1	0	1	0	0	0	0.0103484
7296	4776.6	1	0	1	0	0	0	0.0103748
7298	4776.63	1	0	1	0	0	0	0.0103924
7300	4776.67	1	0	1	0	0	0	0.0103755
7302	4776.7	1	0	1	0	0	0	0.0103806
7304	4776.73	1	0	1	0	0	0	0.0103207
7306	4776.77	1	0	1	0	0	0	0.0103626
7308	4776.8	1	0	1	0	0	0	0.0103132
7310	4776.83	1	0	1	0	0	0	0.0103234
7312	4776.87	1	0	1	0	0	0	0.0103586
7314	4776.9	1	0	1	0	0	0	0.0103772
7316	4776.93	1	0	1	0	0	0	0.0103978
7318	4776.97	1	0	1	0	0	0	0.0103088
7320	4777	1	0	1	0	0	0	0.0103562
7322	4777.03	1	0	1	0	0	0	0.0103447
7324	4777.07	1	0	1	0	0	0	0.0103467
7326	4777.1	1	0	1	0	0	0	0.0103457
7328	4777.13	1	0	1	0	0	0	0.0103522
7330	4777.17	1	0	1	0	0	0	0.0104033
7332	4777.2	1	0	1	0	0	0	0.0103593
7334	4777.23	1	0	1	0	0	0	0.0103677
7336	4777.27	1	0	1	0	0	0	0.0103254
7338	4777.3	1	0	1	0	0	0	0.0103241
7340	4777.33	1	0	1	0	0	0	0.0103711
7342	4777.37	1	0	1	0	0	0	0.0103782
7344	4777.4	1	0	1	0	0	0	0.0103562
7346	4777.43	1	0	1	0	0	0	0.0103363
7348	4777.47	1	0	1	0	0	0	0.0103393
7350	4777.5	1	0	1	0	0	0	0.010253
7352	4777.53	1	0	1	0	0	0	0.0103589
7354	4777.57	1	0	1	0	0	0	0.0103065
7356	4777.6	1	0	1	0	0	0	0.0103884
7358	4777.63	1	0	1	0	0	0	0.0103731
7360	4777.67	1	0	1	0	0	0	0.0104225
7362	4777.7	1	0	1	0	0	0	0.0104415
7364	4777.73	1	0	1	0	0	0	0.01043
7366	4777.77	1	0	1	0	0	0	0.0104056
7368	4777.8	1	0	1	0	0	0	0.0104385
7370	4777.83	1	0	1	0	0	0	0.010388
7372	4777.87	1	0	1	0	0	0	0.0104124
7374	4777.9	1	0	1	0	0	0	0.0103758
7376	4777.93	1	0	1	0	0	0	0.0103934
7378	4777.97	1	0	1	0	0	0	0.0104063
7380	4778	1	0	1	0	0	0	0.0103535
7382	4778.03	1	0	1	0	0	0	0.0103518
7384	4778.07	1	0	1	0	0	0	0.0103247
7386	4778.1	1	0	1	0	0	0	0.0103687
7388	4778.13	1	0	1	0	0	0	0.010362
7390	4778.17	1	0	1	0	0	0	0.0103261
7392	4778.2	1	0	1	0	0	0	0.0102983
7394	4778.23	1	0	1	0	0	0	0.0102923
7396	4778.27	1	0	1	0	0	0	0.0103254
7398	4778.3	1	0	1	0	0	0	0.0102364
7400	4778.33	1	0	1	0	0	0	0.0102784
7402	4778.37	1	0	1	0	0	0	0.0102787
7404	4778.4	1	0	1	0	0	0	0.0102706
7406	4778.43	1	0	1	0	0	0	0.0102912
7408	4778.47	1	0	1	0	0	0	0.0102669
7410	4778.5	1	0	1	0	0	0	0.0103014
7412	4778.53	1	0	1	0	0	0	0.0102967
7414	4778.57	1	0	1	0	0	0	0.0102554
7416	4778.6	1	0	1	0	0	0	0.0102828
7418	4778.63	1	0	1	0	0	0	0.0102801
7420	4778.67	1	0	1	0	0	0	0.010298
7422	4778.7	1	0	1	0	0	0	0.0102696
7424	4778.73	1	0	1	0	0	0	0.0102645
7426	4778.77	1	0	1	0	0	0	0.0103126
7428	4778.8	1	0	1	0	0	0	0.0103356
7430	4778.83	1	0	1	0	0	0	0.0103176
7432	4778.87	1	0	1	0	0	0	0.0103207
7434	4778.9	1	0	1	0	0	0	0.0102506
7436	4778.93	1	0	1	0	0	0	0.0103071
7438	4778.97	1	0	1	0	0	0	0.0102808
7440	4779	1	0	1	0	0	0	0.010278
7442	4779.03	1	0	1	0	0	0	0.0102814
7444	4779.07	1	0	1	0	0	0	0.0103187
7446	4779.1	1	0	1	0	0	0	0.010299
7448	4779.13	1	0	1	0	0	0	0.0102828
7450	4779.17	1	0	1	0	0	0	0.0103271
7452	4779.2	1	0	1	0	0	0	0.0102885
7454	4779.23	1	0	1	0	0	0	0.0103369
7456	4779.27	1	0	1	0	0	0	0.0103352
7458	4779.3	1	0	1	0	0	0	0.0103264
7460	4779.33	1	0	1	0	0	0	0.0102862
7462	4779.37	1	0	1	0	0	0	0.0102828
7464	4779.4	1	0	1	0	0	0	0.0103366
7466	4779.43	1	0	1	0	0	0	0.0102753
7468	4779.47	1	0	1	0	0	0	0.0103278
7470	4779.5	1	0	1	0	0	0	0.0102909
7472	4779.53	1	0	1	0	0	0	0.0102858
7474	4779.57	1	0	1	0	0	0	0.0103481
7476	4779.6	1	0	1	0	0	0	0.0102706
7478	4779.63	1	0	1	0	0	0	0.0103071
7480	4779.67	1	0	1	0	0	0	0.0103542
7482	4779.7	1	0	1	0	0	0	0.0103569
7484	4779.73	1	0	1	0	0	0	0.0103721
7486	4779.77	1	0	1	0	0	0	0.0103143
7488	4779.8	1	0	1	0	0	0	0.0103254
7490	4779.83	1	0	1	0	0	0	0.0102882
7492	4779.87	1	0	1	0	0	0	0.0102527
7494	4779.9	1	0	1	0	0	0	0.0102774
7496	4779.93	1	0	1	0	0	0	0.0103305
7498	4779.97	1	0	1	0	0	0	0.0102814
7500	4780	1	0	1	0	0	0	0.0103136
7502	4780.03	1	0	1	0	0	0	0.0102774
7504	4780.07	1	0	1	0	0	0	0.0103166
7506	4780.1	1	0	1	0	0	0	0.0103085
7508	4780.13	1	0	1	0	0	0	0.0103224
7510	4780.17	1	0	1	0	0	0	0.0102967
7512	4780.2	1	0	1	0	0	0	0.0103082
7514	4780.23	1	0	1	0	0	0	0.0103163
7516	4780.27	1	0	1	0	0	0	0.01025
7518	4780.3	1	0	1	0	0	0	0.0102841
7520	4780.33	1	0	1	0	0	0	0.0102621
7522	4780.37	1	0	1	0	0	0	0.0102266
7524	4780.4	1	0	1	0	0	0	0.010229
7526	4780.43	1	0	1	0	0	0	0.0102611
7528	4780.47	1	0	1	0	0	0	0.0102963
7530	4780.5	1	0	1	0	0	0	0.0103207
7532	4780.53	1	0	1	0	0	0	0.0103315
7534	4780.57	1	0	1	0	0	0	0.010318
7536	4780.6	1	0	1	0	0	0	0.010365
7538	4780.63	1	0	1	0	0	0	0.0103339
7540	4780.67	1	0	1	0	0	0	0.0103004
7542	4780.7	1	0	1	0	0	0	0.0102973
7544	4780.73	1	0	1	0	0	0	0.0102313
7546	4780.77	1	0	1	0	0	0	0.010254
7548	4780.8	1	0	1	0	0	0	0.0102202
7550	4780.83	1	0	1	0	0	0	0.0102049
7552	4780.87	1	0	1	0	0	0	0.0102723
7554	4780.9	1	0	1	0	0	0	0.0102232
7556	4780.93	1	0	1	0	0	0	0.0102994
7558	4780.97	1	0	1	0	0	0	0.0102743
7560	4781	1	0	1	0	0	0	0.0102797
7562	4781.03	1	0	1	0	0	0	0.0102804
7564	4781.07	1	0	1	0	0	0	0.0102425
7566	4781.1	1	0	1	0	0	0	0.0102848
7568	4781.13	1	0	1	0	0	0	0.0102405
7570	4781.17	1	0	1	0	0	0	0.0103041
7572	4781.2	1	0	1	0	0	0	0.0102835
7574	4781.23	1	0	1	0	0	0	0.0102696
7576	4781.27	1	0	1	0	0	0	0.010254
7578	4781.3	1	0	1	0	0	0	0.0102395
7580	4781.33	1	0	1	0	0	0	0.0102469
7582	4781.37	1	0	1	0	0	0	0.0102378
7584	4781.4	1	0	1	0	0	0	0.0102848
7586	4781.43	1	0	1	0	0	0	0.0102777
7588	4781.47	1	0	1	0	0	0	0.0102574
7590	4781.5	1	0	1	0	0	0	0.0102645
7592	4781.53	1	0	1	0	0	0	0.0102537
7594	4781.57	1	0	1	0	0	0	0.0102611
7596	4781.6	1	0	1	0	0	0	0.0102919
7598	4781.63	1	0	1	0	0	0	0.0102344
7600	4781.67	1	0	1	0	0	0	0.0102581
7602	4781.7	1	0	1	0	0	0	0.0102554
7604	4781.73	1	0	1	0	0	0	0.0102645
7606	4781.77	1	0	1	0	0	0	0.0102479
7608	4781.8	1	0	1	0	0	0	0.0103031
7610	4781.83	1	0	1	0	0	0	0.0102388
7612	4781.87	1	0	1	0	0	0	0.0102601
7614	4781.9	1	0	1	0	0	0	0.0102801
7616	4781.93	1	0	1	0	0	0	0.0102672
7618	4781.97	1	0	1	0	0	0	0.0102865
7620	4782	1	0	1	0	0	0	0.0102486
7622	4782.03	1	0	1	0	0	0	0.0103092
7624	4782.07	1	0	1	0	0	0	0.0103085
7626	4782.1	1	0	1	0	0	0	0.0102811
7628	4782.13	1	0	1	0	0	0	0.0102713
7630	4782.17	1	0	1	0	0	0	0.0103034
7632	4782.2	1	0	1	0	0	0	0.0102594
7634	4782.23	1	0	1	0	0	0	0.0102716
7636	4782.27	1	0	1	0	0	0	0.0102983
7638	4782.3	1	0	1	0	0	0	0.0103214
7640	4782.33	1	0	1	0	0	0	0.0103041
7642	4782.37	1	0	1	0	0	0	0.0102516
7644	4782.4	1	0	1	0	0	0	0.0102483
7646	4782.43	1	0	1	0	0	0	0.0102692
7648	4782.47	1	0	1	0	0	0	0.0102923
7650	4782.5	1	0	1	0	0	0	0.0102652
7652	4782.53	1	0	1	0	0	0	0.0102764
7654	4782.57	1	0	1	0	0	0	0.0102892
7656	4782.6	1	0	1	0	0	0	0.0103115
7658	4782.63	1	0	1	0	0	0	0.0102486
7660	4782.67	1	0	1	0	0	0	0.0102655
7662	4782.7	1	0	1	0	0	0	0.0102449
7664	4782.73	1	0	1	0	0	0	0.0102743
7666	4782.77	1	0	1	0	0	0	0.0102405
7668	4782.8	1	0	1	0	0	0	0.010234
7670	4782.83	1	0	1	0	0	0	0.0102672
7672	4782.87	1	0	1	0	0	0	0.0102828
7674	4782.9	1	0	1	0	0	0	0.010278
7676	4782.93	1	0	1	0	0	0	0.0102831
7678	4782.97	1	0	1	0	0	0	0.010273
7680	4783	1	0	1	0	0	0	0.010272
7682	4783.03	1	0	1	0	0	0	0.0103014
7684	4783.07	1	0	1	0	0	0	0.010295
7686	4783.1	1	0	1	0	0	0	0.0102604
7688	4783.13	1	0	1	0	0	0	0.0103092
7690	4783.17	1	0	1	0	0	0	0.0103149
7692	4783.2	1	0	1	0	0	0	0.0103082
7694	4783.23	1	0	1	0	0	0	0.010299
7696	4783.27	1	0	1	0	0	0	0.0102791
7698	4783.3	1	0	1	0	0	0	0.0103038
7700	4783.33	1	0	1	0	0	0	0.0103082
7702	4783.37	1	0	1	0	0	0	0.010322
7704	4783.4	1	0	1	0	0	0	0.0103156
7706	4783.43	1	0	1	0	0	0	0.0102997
7708	4783.47	1	0	1	0	0	0	0.0102621
7710	4783.5	1	0	1	0	0	0	0.0103112
7712	4783.53	1	0	1	0	0	0	0.0103146
7714	4783.57	1	0	1	0	0	0	0.0102571
7716	4783.6	1	0	1	0	0	0	0.0102723
7718	4783.63	1	0	1	0	0	0	0.0102202
7720	4783.67	1	0	1	0	0	0	0.0102476
7722	4783.7	1	0	1	0	0	0	0.0102591
7724	4783.73	1	0	1	0	0	0	0.0102821
7726	4783.77	1	0	1	0	0	0	0.0103423
7728	4783.8	1	0	1	0	0	0	0.0102533
7730	4783.83	1	0	1	0	0	0	0.0103017
7732	4783.87	1	0	1	0	0	0	0.0102665
7734	4783.9	1	0	1	0	0	0	0.0102476
7736	4783.93	1	0	1	0	0	0	0.0102818
7738	4783.97	1	0	1	0	0	0	0.0102774
7740	4784	1	0	1	0	0	0	0.0102899
7742	4784.03	1	0	1	0	0	0	0.0103078
7744	4784.07	1	0	1	0	0	0	0.0103099
7746	4784.1	1	0	1	0	0	0	0.010295
7748	4784.13	1	0	1	0	0	0	0.0103386
7750	4784.17	1	0	1	0	0	0	0.010251
7752	4784.2	1	0	1	0	0	0	0.0102439
7754	4784.23	1	0	1	0	0	0	0.0102997
7756	4784.27	1	0	1	0	0	0	0.0103102
7758	4784.3	1	0	1	0	0	0	0.0102994
7760	4784.33	1	0	1	0	0	0	0.0102902
7762	4784.37	1	0	1	0	0	0	0.0102398
7764	4784.4	1	0	1	0	0	0	0.0102368
7766	4784.43	1	0	1	0	0	0	0.01021
7768	4784.47	1	0	1	0	0	0	0.0102256
7770	4784.5	1	0	1	0	0	0	0.0102398
7772	4784.53	1	0	1	0	0	0	0.0102347
7774	4784.57	1	0	1	0	0	0	0.0102158
7776	4784.6	1	0	1	0	0	0	0.0102046
7778	4784.63	1	0	1	0	0	0	0.010234
7780	4784.67	1	0	1	0	0	0	0.0102229
7782	4784.7	1	0	1	0	0	0	0.0102087
7784	4784.73	1	0	1	0	0	0	0.0102466
7786	4784.77	1	0	1	0	0	0	0.0102611
7788	4784.8	1	0	1	0	0	0	0.0102618
7790	4784.83	1	0	1	0	0	0	0.0102466
7792	4784.87	1	0	1	0	0	0	0.0102354
7794	4784.9	1	0	1	0	0	0	0.010272
7796	4784.93	1	0	1	0	0	0	0.0102686
7798	4784.97	1	0	1	0	0	0	0.0102916
7800	4785	1	0	1	0	0	0	0.0102503
7802	4785.03	1	0	1	0	0	0	0.0102351
7804	4785.07	1	0	1	0	0	0	0.0102178
7806	4785.1	1	0	1	0	0	0	0.0101823
7808	4785.13	1	0	1	0	0	0	0.0102242
7810	4785.17	1	0	1	0	0	0	0.0102215
7812	4785.2	1	0	1	0	0	0	0.0102466
7814	4785.23	1	0	1	0	0	0	0.0102188
7816	4785.27	1	0	1	0	0	0	0.0102029
7818	4785.3	1	0	1	0	0	0	0.0102415
7820	4785.33	1	0	1	0	0	0	0.0101741
7822	4785.37	1	0	1	0	0	0	0.0102249
7824	4785.4	1	0	1	0	0	0	0.0102378
7826	4785.43	1	0	1	0	0	0	0.0101721
7828	4785.47	1	0	1	0	0	0	0.0101938
7830	4785.5	1	0	1	0	0	0	0.0101938
7832	4785.53	1	0	1	0	0	0	0.0102185
7834	4785.57	1	0	1	0	0	0	0.0101765
7836	4785.6	1	0	1	0	0	0	0.0101728
7838	4785.63	1	0	1	0	0	0	0.0101897
7840	4785.67	1	0	1	0	0	0	0.010161
7842	4785.7	1	0	1	0	0	0	0.0102033
7844	4785.73	1	0	1	0	0	0	0.010206
7846	4785.77	1	0	1	0	0	0	0.010187
7848	4785.8	1	0	1	0	0	0	0.0101731
7850	4785.83	1	0	1	0	0	0	0.0102093
7852	4785.87	1	0	1	0	0	0	0.0101796
7854	4785.9	1	0	1	0	0	0	0.0102215
7856	4785.93	1	0	1	0	0	0	0.0101637
7858	4785.97	1	0	1	0	0	0	0.0101315
7860	4786	1	0	1	0	0	0	0.0101758
7862	4786.03	1	0	1	0	0	0	0.0102317
7864	4786.07	1	0	1	0	0	0	0.0102188
7866	4786.1	1	0	1	0	0	0	0.0102066
7868	4786.13	1	0	1	0	0	0	0.0101877
7870	4786.17	1	0	1	0	0	0	0.0102077
7872	4786.2	1	0	1	0	0	0	0.0101836
7874	4786.23	1	0	1	0	0	0	0.0102591
7876	4786.27	1	0	1	0	0	0	0.0101721
7878	4786.3	1	0	1	0	0	0	0.0102107
7880	4786.33	1	0	1	0	0	0	0.0102114
7882	4786.37	1	0	1	0	0	0	0.0102151
7884	4786.4	1	0	1	0	0	0	0.0101765
7886	4786.43	1	0	1	0	0	0	0.0102422
7888	4786.47	1	0	1	0	0	0	0.0102215
7890	4786.5	1	0	1	0	0	0	0.0101985
7892	4786.53	1	0	1	0	0	0	0.0102381
7894	4786.57	1	0	1	0	0	0	0.0102083
7896	4786.6	1	0	1	0	0	0	0.0101989
7898	4786.63	1	0	1	0	0	0	0.0101833
7900	4786.67	1	0	1	0	0	0	0.0101701
7902	4786.7	1	0	1	0	0	0	0.0101437
7904	4786.73	1	0	1	0	0	0	0.0101376
7906	4786.77	1	0	1	0	0	0	0.0102039
7908	4786.8	1	0	1	0	0	0	0.0101708
7910	4786.83	1	0	1	0	0	0	0.0101938
7912	4786.87	1	0	1	0	0	0	0.0101549
7914	4786.9	1	0	1	0	0	0	0.0101691
7916	4786.93	1	0	1	0	0	0	0.0102046
7918	4786.97	1	0	1	0	0	0	0.0101819
7920	4787	1	0	1	0	0	0	0.0101711
7922	4787.03	1	0	1	0	0	0	0.010184
7924	4787.07	1	0	1	0	0	0	0.0101684
7926	4787.1	1	0	1	0	0	0	0.0102043
7928	4787.13	1	0	1	0	0	0	0.0101467
7930	4787.17	1	0	1	0	0	0	0.0101569
7932	4787.2	1	0	1	0	0	0	0.0102225
7934	4787.23	1	0	1	0	0	0	0.01023
7936	4787.27	1	0	1	0	0	0	0.0102571
7938	4787.3	1	0	1	0	0	0	0.0102933
7940	4787.33	1	0	1	0	0	0	0.0102263
7942	4787.37	1	0	1	0	0	0	0.0102357
7944	4787.4	1	0	1	0	0	0	0.0102604
7946	4787.43	1	0	1	0	0	0	0.0102232
7948	4787.47	1	0	1	0	0	0	0.0102066
7950	4787.5	1	0	1	0	0	0	0.0101884
7952	4787.53	1	0	1	0	0	0	0.010209
7954	4787.57	1	0	1	0	0	0	0.0102077
7956	4787.6	1	0	1	0	0	0	0.0101951
7958	4787.63	1	0	1	0	0	0	0.0102354
7960	4787.67	1	0	1	0	0	0	0.0102073
7962	4787.7	1	0	1	0	0	0	0.0102181
7964	4787.73	1	0	1	0	0	0	0.0101958
7966	4787.77	1	0	1	0	0	0	0.0101897
7968	4787.8	1	0	1	0	0	0	0.0101576
7970	4787.83	1	0	1	0	0	0	0.0101369
7972	4787.87	1	0	1	0	0	0	0.0102093
7974	4787.9	1	0	1	0	0	0	0.0101457
7976	4787.93	1	0	1	0	0	0	0.0101816
7978	4787.97	1	0	1	0	0	0	0.0101637
7980	4788	1	0	1	0	0	0	0.0101765
7982	4788.03	1	0	1	0	0	0	0.0101528
7984	4788.07	1	0	1	0	0	0	0.0101386
7986	4788.1	1	0	1	0	0	0	0.0101928
7988	4788.13	1	0	1	0	0	0	0.010233
7990	4788.17	1	0	1	0	0	0	0.0101894
7992	4788.2	1	0	1	0	0	0	0.0102178
7994	4788.23	1	0	1	0	0	0	0.0101593
7996	4788.27	1	0	1	0	0	0	0.0101928
7998	4788.3	1	0	1	0	0	0	0.01021
8000	4788.33	1	0	1	0	0	0	0.0101467
8002	4788.37	1	0	1	0	0	0	0.0101413
8004	4788.4	1	0	1	0	0	0	0.0101522
8006	4788.43	1	0	1	0	0	0	0.0101599
8008	4788.47	1	0	1	0	0	0	0.0101166
8010	4788.5	1	0	1	0	0	0	0.0101291
8012	4788.53	1	0	1	0	0	0	0.0101004
8014	4788.57	1	0	1	0	0	0	0.0101454
8016	4788.6	1	0	1	0	0	0	0.0101136
8018	4788.63	1	0	1	0	0	0	0.0101576
8020	4788.67	1	0	1	0	0	0	0.0101704
8022	4788.7	1	0	1	0	0	0	0.0101697
8024	4788.73	1	0	1	0	0	0	0.0101586
8026	4788.77	1	0	1	0	0	0	0.0101823
8028	4788.8	1	0	1	0	0	0	0.0102083
8030	4788.83	1	0	1	0	0	0	0.0102554
8032	4788.87	1	0	1	0	0	0	0.0101887
8034	4788.9	1	0	1	0	0	0	0.0101748
8036	4788.93	1	0	1	0	0	0	0.0101525
8038	4788.97	1	0	1	0	0	0	0.0101637
8040	4789	1	0	1	0	0	0	0.0100933
8042	4789.03	1	0	1	0	0	0	0.0101498
8044	4789.07	1	0	1	0	0	0	0.010144
8046	4789.1	1	0	1	0	0	0	0.010188
8048	4789.13	1	0	1	0	0	0	0.0101735
8050	4789.17	1	0	1	0	0	0	0.010163
8052	4789.2	1	0	1	0	0	0	0.0101603
8054	4789.23	1	0	1	0	0	0	0.0102148
8056	4789.27	1	0	1	0	0	0	0.010164
8058	4789.3	1	0	1	0	0	0	0.0101887
8060	4789.33	1	0	1	0	0	0	0.0101599
8062	4789.37	1	0	1	0	0	0	0.0102137
8064	4789.4	1	0	1	0	0	0	0.0101745
8066	4789.43	1	0	1	0	0	0	0.0101961
8068	4789.47	1	0	1	0	0	0	0.0101511
8070	4789.5	1	0	1	0	0	0	0.0101792
8072	4789.53	1	0	1	0	0	0	0.0102039
8074	4789.57	1	0	1	0	0	0	0.0101576
8076	4789.6	1	0	1	0	0	0	0.0101823
8078	4789.63	1	0	1	0	0	0	0.0102114
8080	4789.67	1	0	1	0	0	0	0.0101867
8082	4789.7	1	0	1	0	0	0	0.0102019
8084	4789.73	1	0	1	0	0	0	0.0101853
8086	4789.77	1	0	1	0	0	0	0.0101745
8088	4789.8	1	0	1	0	0	0	0.0101745
8090	4789.83	1	0	1	0	0	0	0.0101356
8092	4789.87	1	0	1	0	0	0	0.0101227
8094	4789.9	1	0	1	0	0	0	0.010166
8096	4789.93	1	0	1	0	0	0	0.0101758
8098	4789.97	1	0	1	0	0	0	0.0101823
8100	4790	1	0	1	0	0	0	0.0101982
8102	4790.03	1	0	1	0	0	0	0.010208
8104	4790.07	1	0	1	0	0	0	0.0101684
8106	4790.1	1	0	1	0	0	0	0.0101904
8108	4790.13	1	0	1	0	0	0	0.0101921
8110	4790.17	1	0	1	0	0	0	0.0102428
8112	4790.2	1	0	1	0	0	0	0.0102056
8114	4790.23	1	0	1	0	0	0	0.0101796
8116	4790.27	1	0	1	0	0	0	0.0101961
8118	4790.3	1	0	1	0	0	0	0.0101894
8120	4790.33	1	0	1	0	0	0	0.0101478
8122	4790.37	1	0	1	0	0	0	0.0101518
8124	4790.4	1	0	1	0	0	0	0.0101992
8126	4790.43	1	0	1	0	0	0	0.0101843
8128	4790.47	1	0	1	0	0	0	0.0102066
8130	4790.5	1	0	1	0	0	0	0.0101427
8132	4790.53	1	0	1	0	0	0	0.010119
8134	4790.57	1	0	1	0	0	0	0.010141
8136	4790.6	1	0	1	0	0	0	0.0101281
8138	4790.63	1	0	1	0	0	0	0.0101633
8140	4790.67	1	0	1	0	0	0	0.0101603
8142	4790.7	1	0	1	0	0	0	0.0101613
8144	4790.73	1	0	1	0	0	0	0.0101582
8146	4790.77	1	0	1	0	0	0	0.0102073
8148	4790.8	1	0	1	0	0	0	0.010143
8150	4790.83	1	0	1	0	0	0	0.010142
8152	4790.87	1	0	1	0	0	0	0.0101789
8154	4790.9	1	0	1	0	0	0	0.0101721
8156	4790.93	1	0	1	0	0	0	0.0102033
8158	4790.97	1	0	1	0	0	0	0.0101985
8160	4791	1	0	1	0	0	0	0.0101846
8162	4791.03	1	0	1	0	0	0	0.0101494
8164	4791.07	1	0	1	0	0	0	0.0101528
8166	4791.1	1	0	1	0	0	0	0.0101616
8168	4791.13	1	0	1	0	0	0	0.0101525
8170	4791.17	1	0	1	0	0	0	0.0101569
8172	4791.2	1	0	1	0	0	0	0.0101153
8174	4791.23	1	0	1	0	0	0	0.0101413
8176	4791.27	1	0	1	0	0	0	0.0101048
8178	4791.3	1	0	1	0	0	0	0.0101721
8180	4791.33	1	0	1	0	0	0	0.010141
8182	4791.37	1	0	1	0	0	0	0.0101532
8184	4791.4	1	0	1	0	0	0	0.0102269
8186	4791.43	1	0	1	0	0	0	0.0102222
8188	4791.47	1	0	1	0	0	0	0.0102676
8190	4791.5	1	0	1	0	0	0	0.0102865
8192	4791.53	1	0	1	0	0	0	0.010272
8194	4791.57	1	0	1	0	0	0	0.0102598
8196	4791.6	1	0	1	0	0	0	0.0102219
8198	4791.63	1	0	1	0	0	0	0.0101894
8200	4791.67	1	0	1	0	0	0	0.0101826
8202	4791.7	1	0	1	0	0	0	0.0101992
8204	4791.73	1	0	1	0	0	0	0.0101931
8206	4791.77	1	0	1	0	0	0	0.0101863
8208	4791.8	1	0	1	0	0	0	0.0101972
8210	4791.83	1	0	1	0	0	0	0.0101708
8212	4791.87	1	0	1	0	0	0	0.0102107
8214	4791.9	1	0	1	0	0	0	0.0102181
8216	4791.93	1	0	1	0	0	0	0.0102774
8218	4791.97	1	0	1	0	0	0	0.0102875
8220	4792	1	0	1	0	0	0	0.0102615
8222	4792.03	1	0	1	0	0	0	0.0103187
8224	4792.07	1	0	1	0	0	0	0.0102618
8226	4792.1	1	0	1	0	0	0	0.0101897
8228	4792.13	1	0	1	0	0	0	0.0101995
8230	4792.17	1	0	1	0	0	0	0.0102134
8232	4792.2	1	0	1	0	0	0	0.0102188
8234	4792.23	1	0	1	0	0	0	0.0102053
8236	4792.27	1	0	1	0	0	0	0.0102357
8238	4792.3	1	0	1	0	0	0	0.010208
8240	4792.33	1	0	1	0	0	0	0.0101813
8242	4792.37	1	0	1	0	0	0	0.0102175
8244	4792.4	1	0	1	0	0	0	0.0103163
8246	4792.43	1	0	1	0	0	0	0.0102743
8248	4792.47	1	0	1	0	0	0	0.0102912
8250	4792.5	1	0	1	0	0	0	0.0103011
8252	4792.53	1	0	1	0	0	0	0.0102533
8254	4792.57	1	0	1	0	0	0	0.0102449
8256	4792.6	1	0	1	0	0	0	0.0102043
8258	4792.63	1	0	1	0	0	0	0.0102591
8260	4792.67	1	0	1	0	0	0	0.0102902
8262	4792.7	1	0	1	0	0	0	0.0102655
8264	4792.73	1	0	1	0	0	0	0.0102293
8266	4792.77	1	0	1	0	0	0	0.0102198
8268	4792.8	1	0	1	0	0	0	0.0102378
8270	4792.83	1	0	1	0	0	0	0.0102544
8272	4792.87	1	0	1	0	0	0	0.0102493
8274	4792.9	1	0	1	0	0	0	0.0102388
8276	4792.93	1	0	1	0	0	0	0.0102618
8278	4792.97	1	0	1	0	0	0	0.0102875
8280	4793	1	0	1	0	0	0	0.0103406
8282	4793.03	1	0	1	0	0	0	0.0103048
8284	4793.07	1	0	1	0	0	0	0.0102743
8286	4793.1	1	0	1	0	0	0	0.0102276
8288	4793.13	1	0	1	0	0	0	0.010229
8290	4793.17	1	0	1	0	0	0	0.010211
8292	4793.2	1	0	1	0	0	0	0.0101576
8294	4793.23	1	0	1	0	0	0	0.010211
8296	4793.27	1	0	1	0	0	0	0.0101917
8298	4793.3	1	0	1	0	0	0	0.010206
8300	4793.33	1	0	1	0	0	0	0.0101853
8302	4793.37	1	0	1	0	0	0	0.0101948
8304	4793.4	1	0	1	0	0	0	0.0102117
8306	4793.43	1	0	1	0	0	0	0.0102503
8308	4793.47	1	0	1	0	0	0	0.0102936
8310	4793.5	1	0	1	0	0	0	0.0102652
8312	4793.53	1	0	1	0	0	0	0.0102588
8314	4793.57	1	0	1	0	0	0	0.0102635
8316	4793.6	1	0	1	0	0	0	0.0102835
8318	4793.63	1	0	1	0	0	0	0.0102425
8320	4793.67	1	0	1	0	0	0	0.010185
8322	4793.7	1	0	1	0	0	0	0.010211
8324	4793.73	1	0	1	0	0	0	0.0102418
8326	4793.77	1	0	1	0	0	0	0.0102479
8328	4793.8	1	0	1	0	0	0	0.0102384
8330	4793.83	1	0	1	0	0	0	0.0102892
8332	4793.87	1	0	1	0	0	0	0.0102195
8334	4793.9	1	0	1	0	0	0	0.0101884
8336	4793.93	1	0	1	0	0	0	0.0102225
8338	4793.97	1	0	1	0	0	0	0.0101731
8340	4794	1	0	1	0	0	0	0.0101738
8342	4794.03	1	0	1	0	0	0	0.0101725
8344	4794.07	1	0	1	0	0	0	0.0101775
8346	4794.1	1	0	1	0	0	0	0.0101427
8348	4794.13	1	0	1	0	0	0	0.010098
8350	4794.17	1	0	1	0	0	0	0.0101823
8352	4794.2	1	0	1	0	0	0	0.0101948
8354	4794.23	1	0	1	0	0	0	0.0101285
8356	4794.27	1	0	1	0	0	0	0.0101437
8358	4794.3	1	0	1	0	0	0	0.010144
8360	4794.33	1	0	1	0	0	0	0.0101379
8362	4794.37	1	0	1	0	0	0	0.0101034
8364	4794.4	1	0	1	0	0	0	0.0101312
8366	4794.43	1	0	1	0	0	0	0.0101302
8368	4794.47	1	0	1	0	0	0	0.0101163
8370	4794.5	1	0	1	0	0	0	0.0100909
8372	4794.53	1	0	1	0	0	0	0.0100719
8374	4794.57	1	0	1	0	0	0	0.0100983
8376	4794.6	1	0	1	0	0	0	0.0101176
8378	4794.63	1	0	1	0	0	0	0.0101522
8380	4794.67	1	0	1	0	0	0	0.0101643
8382	4794.7	1	0	1	0	0	0	0.0101373
8384	4794.73	1	0	1	0	0	0	0.0101393
8386	4794.77	1	0	1	0	0	0	0.0101471
8388	4794.8	1	0	1	0	0	0	0.0101224
8390	4794.83	1	0	1	0	0	0	0.0101132
8392	4794.87	1	0	1	0	0	0	0.0101826
8394	4794.9	1	0	1	0	0	0	0.0101596
8396	4794.93	1	0	1	0	0	0	0.0101342
8398	4794.97	1	0	1	0	0	0	0.0101873
8400	4795	1	0	1	0	0	0	0.0100902
8402	4795.03	1	0	1	0	0	0	0.010166
8404	4795.07	1	0	1	0	0	0	0.0101038
8406	4795.1	1	0	1	0	0	0	0.0101315
8408	4795.13	1	0	1	0	0	0	0.0101369
8410	4795.17	1	0	1	0	0	0	0.010123
8412	4795.2	1	0	1	0	0	0	0.0101437
8414	4795.23	1	0	1	0	0	0	0.0101156
8416	4795.27	1	0	1	0	0	0	0.0101484
8418	4795.3	1	0	1	0	0	0	0.0101356
8420	4795.33	1	0	1	0	0	0	0.0101417
8422	4795.37	1	0	1	0	0	0	0.0101417
8424	4795.4	1	0	1	0	0	0	0.0101271
8426	4795.43	1	0	1	0	0	0	0.0101444
8428	4795.47	1	0	1	0	0	0	0.0101694
8430	4795.5	1	0	1	0	0	0	0.0101332
8432	4795.53	1	0	1	0	0	0	0.0101288
8434	4795.57	1	0	1	0	0	0	0.0101457
8436	4795.6	1	0	1	0	0	0	0.0101339
8438	4795.63	1	0	1	0	0	0	0.0101274
8440	4795.67	1	0	1	0	0	0	0.0101247
8442	4795.7	1	0	1	0	0	0	0.0101315
8444	4795.73	1	0	1	0	0	0	0.0101413
8446	4795.77	1	0	1	0	0	0	0.0101417
8448	4795.8	1	0	1	0	0	0	0.01014
8450	4795.83	1	0	1	0	0	0	0.0101941
8452	4795.87	1	0	1	0	0	0	0.0101606
8454	4795.9	1	0	1	0	0	0	0.0101779
8456	4795.93	1	0	1	0	0	0	0.0101714
8458	4795.97	1	0	1	0	0	0	0.0101366
8460	4796	1	0	1	0	0	0	0.0101535
8462	4796.03	1	0	1	0	0	0	0.010121
8464	4796.07	1	0	1	0	0	0	0.0101884
8466	4796.1	1	0	1	0	0	0	0.0101478
8468	4796.13	1	0	1	0	0	0	0.0101518
8470	4796.17	1	0	1	0	0	0	0.0101332
8472	4796.2	1	0	1	0	0	0	0.0101478
8474	4796.23	1	0	1	0	0	0	0.0101711
8476	4796.27	1	0	1	0	0	0	0.0101674
8478	4796.3	1	0	1	0	0	0	0.0101657
8480	4796.33	1	0	1	0	0	0	0.010187
8482	4796.37	1	0	1	0	0	0	0.0101322
8484	4796.4	1	0	1	0	0	0	0.0101654
8486	4796.43	1	0	1	0	0	0	0.0101549
8488	4796.47	1	0	1	0	0	0	0.0101562
8490	4796.5	1	0	1	0	0	0	0.0101809
8492	4796.53	1	0	1	0	0	0	0.010188
8494	4796.57	1	0	1	0	0	0	0.0101657
8496	4796.6	1	0	1	0	0	0	0.0101298
8498	4796.63	1	0	1	0	0	0	0.0101481
8500	4796.67	1	0	1	0	0	0	0.0101153
8502	4796.7	1	0	1	0	0	0	0.0101877
8504	4796.73	1	0	1	0	0	0	0.0101359
8506	4796.77	1	0	1	0	0	0	0.0101579
8508	4796.8	1	0	1	0	0	0	0.0101268
8510	4796.83	1	0	1	0	0	0	0.010121
8512	4796.87	1	0	1	0	0	0	0.0101616
8514	4796.9	1	0	1	0	0	0	0.0101447
8516	4796.93	1	0	1	0	0	0	0.0101291
8518	4796.97	1	0	1	0	0	0	0.0101454
8520	4797	1	0	1	0	0	0	0.0101508
8522	4797.03	1	0	1	0	0	0	0.0101867
8524	4797.07	1	0	1	0	0	0	0.0101819
8526	4797.1	1	0	1	0	0	0	0.010167
8528	4797.13	1	0	1	0	0	0	0.0101444
8530	4797.17	1	0	1	0	0	0	0.0101346
8532	4797.2	1	0	1	0	0	0	0.0101813
8534	4797.23	1	0	1	0	0	0	0.0101498
8536	4797.27	1	0	1	0	0	0	0.0101616
8538	4797.3	1	0	1	0	0	0	0.0101948
8540	4797.33	1	0	1	0	0	0	0.0101427
8542	4797.37	1	0	1	0	0	0	0.0101535
8544	4797.4	1	0	1	0	0	0	0.0101369
8546	4797.43	1	0	1	0	0	0	0.010144
8548	4797.47	1	0	1	0	0	0	0.0101156
8550	4797.5	1	0	1	0	0	0	0.0101109
8552	4797.53	1	0	1	0	0	0	0.010097
8554	4797.57	1	0	1	0	0	0	0.0100831
8556	4797.6	1	0	1	0	0	0	0.0100791
8558	4797.63	1	0	1	0	0	0	0.0100851
8560	4797.67	1	0	1	0	0	0	0.0101291
8562	4797.7	1	0	1	0	0	0	0.010142
8564	4797.73	1	0	1	0	0	0	0.0101379
8566	4797.77	1	0	1	0	0	0	0.0101038
8568	4797.8	1	0	1	0	0	0	0.0101163
8570	4797.83	1	0	1	0	0	0	0.0100692
8572	4797.87	1	0	1	0	0	0	0.0101241
8574	4797.9	1	0	1	0	0	0	0.0101305
8576	4797.93	1	0	1	0	0	0	0.0101027
8578	4797.97	1	0	1	0	0	0	0.0101146
8580	4798	1	0	1	0	0	0	0.01012
8582	4798.03	1	0	1	0	0	0	0.0101454
8584	4798.07	1	0	1	0	0	0	0.0101383
8586	4798.1	1	0	1	0	0	0	0.0101349
8588	4798.13	1	0	1	0	0	0	0.0101308
8590	4798.17	1	0	1	0	0	0	0.0101697
8592	4798.2	1	0	1	0	0	0	0.0101142
8594	4798.23	1	0	1	0	0	0	0.0101312
8596	4798.27	1	0	1	0	0	0	0.0101044
8598	4798.3	1	0	1	0	0	0	0.0101176
8600	4798.33	1	0	1	0	0	0	0.010143
8602	4798.37	1	0	1	0	0	0	0.0101295
8604	4798.4	1	0	1	0	0	0	0.0101403
8606	4798.43	1	0	1	0	0	0	0.0101193
8608	4798.47	1	0	1	0	0	0	0.0101728
8610	4798.5	1	0	1	0	0	0	0.0101065
8612	4798.53	1	0	1	0	0	0	0.01012
8614	4798.57	1	0	1	0	0	0	0.0100889
8616	4798.6	1	0	1	0	0	0	0.0101623
8618	4798.63	1	0	1	0	0	0	0.0101095
8620	4798.67	1	0	1	0	0	0	0.0101308
8622	4798.7	1	0	1	0	0	0	0.0101237
8624	4798.73	1	0	1	0	0	0	0.0101078
8626	4798.77	1	0	1	0	0	0	0.0101308
8628	4798.8	1	0	1	0	0	0	0.0101098
8630	4798.83	1	0	1	0	0	0	0.010118
8632	4798.87	1	0	1	0	0	0	0.0100929
8634	4798.9	1	0	1	0	0	0	0.0101346
8636	4798.93	1	0	1	0	0	0	0.0101484
8638	4798.97	1	0	1	0	0	0	0.010118
8640	4799	1	0	1	0	0	0	0.010096
8642	4799.03	1	0	1	0	0	0	0.0100652
8644	4799.07	1	0	1	0	0	0	0.010119
8646	4799.1	1	0	1	0	0	0	0.0101214
8648	4799.13	1	0	1	0	0	0	0.0101366
8650	4799.17	1	0	1	0	0	0	0.0101454
8652	4799.2	1	0	1	0	0	0	0.0101291
8654	4799.23	1	0	1	0	0	0	0.0101021
8656	4799.27	1	0	1	0	0	0	0.0100906
8658	4799.3	1	0	1	0	0	0	0.010144
8660	4799.33	1	0	1	0	0	0	0.0101153
8662	4799.37	1	0	1	0	0	0	0.0100787
8664	4799.4	1	0	1	0	0	0	0.010117
8666	4799.43	1	0	1	0	0	0	0.0100533
8668	4799.47	1	0	1	0	0	0	0.0099958
8670	4799.5	1	0	1	0	0	0	0.010051
8672	4799.53	1	0	1	0	0	0	0.010054
8674	4799.57	1	0	1	0	0	0	0.0100967
8676	4799.6	1	0	1	0	0	0	0.0100591
8678	4799.63	1	0	1	0	0	0	0.0100645
8680	4799.67	1	0	1	0	0	0	0.0100479
8682	4799.7	1	0	1	0	0	0	0.0100659
8684	4799.73	1	0	1	0	0	0	0.0100706
8686	4799.77	1	0	1	0	0	0	0.0100503
8688	4799.8	1	0	1	0	0	0	0.0100574
8690	4799.83	1	0	1	0	0	0	0.0100631
8692	4799.87	1	0	1	0	0	0	0.0100696
8694	4799.9	1	0	1	0	0	0	0.0100872
8696	4799.93	1	0	1	0	0	0	0.010033
8698	4799.97	1	0	1	0	0	0	0.0100374
8700	4800	1	0	1	0	0	0	0.0100449
8702	4800.03	1	0	1	0	0	0	0.0100374
8704	4800.07	1	0	1	0	0	0	0.00998904
8706	4800.1	1	0	1	0	0	0	0.0100439
8708	4800.13	1	0	1	0	0	0	0.0100493
8710	4800.17	1	0	1	0	0	0	0.0100246
8712	4800.2	1	0	1	0	0	0	0.0100889
8714	4800.23	1	0	1	0	0	0	0.0100804
8716	4800.27	1	0	1	0	0	0	0.0100435
8718	4800.3	1	0	1	0	0	0	0.0100838
8720	4800.33	1	0	1	0	0	0	0.0100486
8722	4800.37	1	0	1	0	0	0	0.0100506
8724	4800.4	1	0	1	0	0	0	0.0100513
8726	4800.43	1	0	1	0	0	0	0.0100215
8728	4800.47	1	0	1	0	0	0	0.0100591
8730	4800.5	1	0	1	0	0	0	0.010032
8732	4800.53	1	0	1	0	0	0	0.0100659
8734	4800.57	1	0	1	0	0	0	0.010051
8736	4800.6	1	0	1	0	0	0	0.0100533
8738	4800.63	1	0	1	0	0	0	0.0100648
8740	4800.67	1	0	1	0	0	0	0.0100148
8742	4800.7	1	0	1	0	0	0	0.0101105
8744	4800.73	1	0	1	0	0	0	0.0100743
8746	4800.77	1	0	1	0	0	0	0.0100577
8748	4800.8	1	0	1	0	0	0	0.0100337
8750	4800.83	1	0	1	0	0	0	0.010032
8752	4800.87	1	0	1	0	0	0	0.0100164
8754	4800.9	1	0	1	0	0	0	0.0100445
8756	4800.93	1	0	1	0	0	0	0.0100496
8758	4800.97	1	0	1	0	0	0	0.0100229
8760	4801	1	0	1	0	0	0	0.0100665
8762	4801.03	1	0	1	0	0	0	0.0100266
8764	4801.07	1	0	1	0	0	0	0.0100493
8766	4801.1	1	0	1	0	0	0	0.0100571
8768	4801.13	1	0	1	0	0	0	0.0100635
8770	4801.17	1	0	1	0	0	0	0.0100324
8772	4801.2	1	0	1	0	0	0	0.0100256
8774	4801.23	1	0	1	0	0	0	0.010052
8776	4801.27	1	0	1	0	0	0	0.0100516
8778	4801.3	1	0	1	0	0	0	0.0100638
8780	4801.33	1	0	1	0	0	0	0.0100665
8782	4801.37	1	0	1	0	0	0	0.0100787
8784	4801.4	1	0	1	0	0	0	0.0100757
8786	4801.43	1	0	1	0	0	0	0.0100648
8788	4801.47	1	0	1	0	0	0	0.0100097
8790	4801.5	1	0	1	0	0	0	0.0100713
8792	4801.53	1	0	1	0	0	0	0.0100635
8794	4801.57	1	0	1	0	0	0	0.010056
8796	4801.6	1	0	1	0	0	0	0.0100838
8798	4801.63	1	0	1	0	0	0	0.0100868
8800	4801.67	1	0	1	0	0	0	0.010096
8802	4801.7	1	0	1	0	0	0	0.0100141
8804	4801.73	1	0	1	0	0	0	0.0100263
8806	4801.77	1	0	1	0	0	0	0.0100344
8808	4801.8	1	0	1	0	0	0	0.0100472
8810	4801.83	1	0	1	0	0	0	0.0100736
8812	4801.87	1	0	1	0	0	0	0.0100547
8814	4801.9	1	0	1	0	0	0	0.0100939
8816	4801.93	1	0	1	0	0	0	0.0100926
8818	4801.97	1	0	1	0	0	0	0.0100977
8820	4802	1	0	1	0	0	0	0.0100767
8822	4802.03	1	0	1	0	0	0	0.0100723
8824	4802.07	1	0	1	0	0	0	0.0101065
8826	4802.1	1	0	1	0	0	0	0.0101173
8828	4802.13	1	0	1	0	0	0	0.0100706
8830	4802.17	1	0	1	0	0	0	0.0101271
8832	4802.2	1	0	1	0	0	0	0.0101274
8834	4802.23	1	0	1	0	0	0	0.0101088
8836	4802.27	1	0	1	0	0	0	0.0101224
8838	4802.3	1	0	1	0	0	0	0.0100973
8840	4802.33	1	0	1	0	0	0	0.0100828
8842	4802.37	1	0	1	0	0	0	0.0101342
8844	4802.4	1	0	1	0	0	0	0.0100828
8846	4802.43	1	0	1	0	0	0	0.0100777
8848	4802.47	1	0	1	0	0	0	0.0101393
8850	4802.5	1	0	1	0	0	0	0.0100977
8852	4802.53	1	0	1	0	0	0	0.010142
8854	4802.57	1	0	1	0	0	0	0.0100716
8856	4802.6	1	0	1	0	0	0	0.0101139
8858	4802.63	1	0	1	0	0	0	0.0100923
8860	4802.67	1	0	1	0	0	0	0.0100807
8862	4802.7	1	0	1	0	0	0	0.0101281
8864	4802.73	1	0	1	0	0	0	0.0100845
8866	4802.77	1	0	1	0	0	0	0.0101021
8868	4802.8	1	0	1	0	0	0	0.010078
8870	4802.83	1	0	1	0	0	0	0.0100564
8872	4802.87	1	0	1	0	0	0	0.0100669
8874	4802.9	1	0	1	0	0	0	0.0101088
8876	4802.93	1	0	1	0	0	0	0.0100547
8878	4802.97	1	0	1	0	0	0	0.0100811
8880	4803	1	0	1	0	0	0	0.0100625
8882	4803.03	1	0	1	0	0	0	0.0101061
8884	4803.07	1	0	1	0	0	0	0.0101021
8886	4803.1	1	0	1	0	0	0	0.0101136
8888	4803.13	1	0	1	0	0	0	0.0101061
8890	4803.17	1	0	1	0	0	0	0.0100567
8892	4803.2	1	0	1	0	0	0	0.0100533
8894	4803.23	1	0	1	0	0	0	0.0101207
8896	4803.27	1	0	1	0	0	0	0.0100916
8898	4803.3	1	0	1	0	0	0	0.0100926
8900	4803.33	1	0	1	0	0	0	0.0100797
8902	4803.37	1	0	1	0	0	0	0.0100987
8904	4803.4	1	0	1	0	0	0	0.0100912
8906	4803.43	1	0	1	0	0	0	0.0100794
8908	4803.47	1	0	1	0	0	0	0.0100848
8910	4803.5	1	0	1	0	0	0	0.0100615
8912	4803.53	1	0	1	0	0	0	0.0100723
8914	4803.57	1	0	1	0	0	0	0.0100875
8916	4803.6	1	0	1	0	0	0	0.0100246
8918	4803.63	1	0	1	0	0	0	0.0100638
8920	4803.67	1	0	1	0	0	0	0.0100818
8922	4803.7	1	0	1	0	0	0	0.0100807
8924	4803.73	1	0	1	0	0	0	0.0100743
8926	4803.77	1	0	1	0	0	0	0.01005
8928	4803.8	1	0	1	0	0	0	0.0100486
8930	4803.83	1	0	1	0	0	0	0.0100252
8932	4803.87	1	0	1	0	0	0	0.0100615
8934	4803.9	1	0	1	0	0	0	0.0100547
8936	4803.93	1	0	1	0	0	0	0.0100327
8938	4803.97	1	0	1	0	0	0	0.0100489
8940	4804	1	0	1	0	0	0	0.00998464
8942	4804.03	1	0	1	0	0	0	0.00999682
8944	4804.07	1	0	1	0	0	0	0.0100513
8946	4804.1	1	0	1	0	0	0	0.0100104
8948	4804.13	1	0	1	0	0	0	0.0101102
8950	4804.17	1	0	1	0	0	0	0.0100895
8952	4804.2	1	0	1	0	0	0	0.0100449
8954	4804.23	1	0	1	0	0	0	0.0100533
8956	4804.27	1	0	1	0	0	0	0.00998531
8958	4804.3	1	0	1	0	0	0	0.0100242
8960	4804.33	1	0	1	0	0	0	0.0100259
8962	4804.37	1	0	1	0	0	0	0.00997651
8964	4804.4	1	0	1	0	0	0	0.0100293
8966	4804.43	1	0	1	0	0	0	0.0100134
8968	4804.47	1	0	1	0	0	0	0.0100117
8970	4804.5	1	0	1	0	0	0	0.0100158
8972	4804.53	1	0	1	0	0	0	0.010056
8974	4804.57	1	0	1	0	0	0	0.0100642
8976	4804.6	1	0	1	0	0	0	0.0100249
8978	4804.63	1	0	1	0	0	0	0.0100757
8980	4804.67	1	0	1	0	0	0	0.010034
8982	4804.7	1	0	1	0	0	0	0.0100801
8984	4804.73	1	0	1	0	0	0	0.0100696
8986	4804.77	1	0	1	0	0	0	0.010011
8988	4804.8	1	0	1	0	0	0	0.0100493
8990	4804.83	1	0	1	0	0	0	0.0100181
8992	4804.87	1	0	1	0	0	0	0.0100073
8994	4804.9	1	0	1	0	0	0	0.0100472
8996	4804.93	1	0	1	0	0	0	0.0100242
8998	4804.97	1	0	1	0	0	0	0.0100794
9000	4805	1	0	1	0	0	0	0.0100933
9002	4805.03	1	0	1	0	0	0	0.0100422
9004	4805.07	1	0	1	0	0	0	0.0100252
9006	4805.1	1	0	1	0	0	0	0.0100489
9008	4805.13	1	0	1	0	0	0	0.0100472
9010	4805.17	1	0	1	0	0	0	0.0100347
9012	4805.2	1	0	1	0	0	0	0.0100303
9014	4805.23	1	0	1	0	0	0	0.0101061
9016	4805.27	1	0	1	0	0	0	0.0101159
9018	4805.3	1	0	1	0	0	0	0.0101305
9020	4805.33	1	0	1	0	0	0	0.0101004
9022	4805.37	1	0	1	0	0	0	0.0101051
9024	4805.4	1	0	1	0	0	0	0.0100777
9026	4805.43	1	0	1	0	0	0	0.0100956
9028	4805.47	1	0	1	0	0	0	0.0100648
9030	4805.5	1	0	1	0	0	0	0.0100587
9032	4805.53	1	0	1	0	0	0	0.0100618
9034	4805.57	1	0	1	0	0	0	0.0100435
9036	4805.6	1	0	1	0	0	0	0.0100645
9038	4805.63	1	0	1	0	0	0	0.0100594
9040	4805.67	1	0	1	0	0	0	0.0100418
9042	4805.7	1	0	1	0	0	0	0.0100381
9044	4805.73	1	0	1	0	0	0	0.0100137
9046	4805.77	1	0	1	0	0	0	0.0100469
9048	4805.8	1	0	1	0	0	0	0.010031
9050	4805.83	1	0	1	0	0	0	0.0100875
9052	4805.87	1	0	1	0	0	0	0.0101061
9054	4805.9	1	0	1	0	0	0	0.0100063
9056	4805.93	1	0	1	0	0	0	0.0100347
9058	4805.97	1	0	1	0	0	0	0.00999513
9060	4806	1	0	1	0	0	0	0.00999343
9062	4806.03	1	0	1	0	0	0	0.00999107
9064	4806.07	1	0	1	0	0	0	0.00998904
9066	4806.1	1	0	1	0	0	0	0.00997821
9068	4806.13	1	0	1	0	0	0	0.0100039
9070	4806.17	1	0	1	0	0	0	0.0100066
9072	4806.2	1	0	1	0	0	0	0.00998531
9074	4806.23	1	0	1	0	0	0	0.00998836
9076	4806.27	1	0	1	0	0	0	0.0100134
9078	4806.3	1	0	1	0	0	0	0.0100009
9080	4806.33	1	0	1	0	0	0	0.00999039
9082	4806.37	1	0	1	0	0	0	0.00998802
9084	4806.4	1	0	1	0	0	0	0.00997956
9086	4806.43	1	0	1	0	0	0	0.010009
9088	4806.47	1	0	1	0	0	0	0.00999986
9090	4806.5	1	0	1	0	0	0	0.00999547
9092	4806.53	1	0	1	0	0	0	0.0100317
9094	4806.57	1	0	1	0	0	0	0.0100476
9096	4806.6	1	0	1	0	0	0	0.0100361
9098	4806.63	1	0	1	0	0	0	0.0100669
9100	4806.67	1	0	1	0	0	0	0.0100631
9102	4806.7	1	0	1	0	0	0	0.0101356
9104	4806.73	1	0	1	0	0	0	0.010054
9106	4806.77	1	0	1	0	0	0	0.0100104
9108	4806.8	1	0	1	0	0	0	0.0100097
9110	4806.83	1	0	1	0	0	0	0.0100384
9112	4806.87	1	0	1	0	0	0	0.01001
9114	4806.9	1	0	1	0	0	0	0.0100205
9116	4806.93	1	0	1	0	0	0	0.0100056
9118	4806.97	1	0	1	0	0	0	0.0100733
9120	4807	1	0	1	0	0	0	0.0101325
9122	4807.03	1	0	1	0	0	0	0.0101258
9124	4807.07	1	0	1	0	0	0	0.0100973
9126	4807.1	1	0	1	0	0	0	0.010117
9128	4807.13	1	0	1	0	0	0	0.0101173
9130	4807.17	1	0	1	0	0	0	0.0100939
9132	4807.2	1	0	1	0	0	0	0.0100912
9134	4807.23	1	0	1	0	0	0	0.0100594
9136	4807.27	1	0	1	0	0	0	0.0100012
9138	4807.3	1	0	1	0	0	0	0.0100665
9140	4807.33	1	0	1	0	0	0	0.0100489
9142	4807.37	1	0	1	0	0	0	0.0100462
9144	4807.4	1	0	1	0	0	0	0.0100537
9146	4807.43	1	0	1	0	0	0	0.0100899
9148	4807.47	1	0	1	0	0	0	0.0100354
9150	4807.5	1	0	1	0	0	0	0.0100049
9152	4807.53	1	0	1	0	0	0	0.0100459
9154	4807.57	1	0	1	0	0	0	0.0100682
9156	4807.6	1	0	1	0	0	0	0.0100648
9158	4807.63	1	0	1	0	0	0	0.0100554
9160	4807.67	1	0	1	0	0	0	0.0100787
9162	4807.7	1	0	1	0	0	0	0.0100723
9164	4807.73	1	0	1	0	0	0	0.0100956
9166	4807.77	1	0	1	0	0	0	0.0100679
9168	4807.8	1	0	1	0	0	0	0.0100875
9170	4807.83	1	0	1	0	0	0	0.0100483
9172	4807.87	1	0	1	0	0	0	0.0100351
9174	4807.9	1	0	1	0	0	0	0.0100899
9176	4807.93	1	0	1	0	0	0	0.0100357
9178	4807.97	1	0	1	0	0	0	0.0100567
9180	4808	1	0	1	0	0	0	0.0100195
9182	4808.03	1	0	1	0	0	0	0.0100134
9184	4808.07	1	0	1	0	0	0	0.0100141
9186	4808.1	1	0	1	0	0	0	0.01001
9188	4808.13	1	0	1	0	0	0	0.010075
9190	4808.17	1	0	1	0	0	0	0.0100987
9192	4808.2	1	0	1	0	0	0	0.0100635
9194	4808.23	1	0	1	0	0	0	0.0100313
9196	4808.27	1	0	1	0	0	0	0.0100381
9198	4808.3	1	0	1	0	0	0	0.010077
9200	4808.33	1	0	1	0	0	0	0.0100547
9202	4808.37	1	0	1	0	0	0	0.0100483
9204	4808.4	1	0	1	0	0	0	0.0100476
9206	4808.43	1	0	1	0	0	0	0.0100368
9208	4808.47	1	0	1	0	0	0	0.0100371
9210	4808.5	1	0	1	0	0	0	0.0100273
9212	4808.53	1	0	1	0	0	0	0.0100719
9214	4808.57	1	0	1	0	0	0	0.0100148
9216	4808.6	1	0	1	0	0	0	0.0100117
9218	4808.63	1	0	1	0	0	0	0.0100398
9220	4808.67	1	0	1	0	0	0	0.0100175
9222	4808.7	1	0	1	0	0	0	0.0100097
9224	4808.73	1	0	1	0	0	0	0.0100154
9226	4808.77	1	0	1	0	0	0	0.00998091
9228	4808.8	1	0	1	0	0	0	0.0100175
9230	4808.83	1	0	1	0	0	0	0.00996332
9232	4808.87	1	0	1	0	0	0	0.010054
9234	4808.9	1	0	1	0	0	0	0.0100046
9236	4808.93	1	0	1	0	0	0	0.0100307
9238	4808.97	1	0	1	0	0	0	0.0100479
9240	4809	1	0	1	0	0	0	0.0100307
9242	4809.03	1	0	1	0	0	0	0.0100192
9244	4809.07	1	0	1	0	0	0	0.0100137
9246	4809.1	1	0	1	0	0	0	0.0100225
9248	4809.13	1	0	1	0	0	0	0.01003
9250	4809.17	1	0	1	0	0	0	0.00998904
9252	4809.2	1	0	1	0	0	0	0.00999986
9254	4809.23	1	0	1	0	0	0	0.0100049
9256	4809.27	1	0	1	0	0	0	0.00999817
9258	4809.3	1	0	1	0	0	0	0.0100022
9260	4809.33	1	0	1	0	0	0	0.00996196
9262	4809.37	1	0	1	0	0	0	0.00996636
9264	4809.4	1	0	1	0	0	0	0.0100053
9266	4809.43	1	0	1	0	0	0	0.00995147
9268	4809.47	1	0	1	0	0	0	0.00997922
9270	4809.5	1	0	1	0	0	0	0.00998091
9272	4809.53	1	0	1	0	0	0	0.00992304
9274	4809.57	1	0	1	0	0	0	0.00993117
9276	4809.6	1	0	1	0	0	0	0.00996433
9278	4809.63	1	0	1	0	0	0	0.010009
9280	4809.67	1	0	1	0	0	0	0.00994098
9282	4809.7	1	0	1	0	0	0	0.00995418
9284	4809.73	1	0	1	0	0	0	0.00999513
9286	4809.77	1	0	1	0	0	0	0.00998599
9288	4809.8	1	0	1	0	0	0	0.00994504
9290	4809.83	1	0	1	0	0	0	0.00996433
9292	4809.87	1	0	1	0	0	0	0.00992711
9294	4809.9	1	0	1	0	0	0	0.00995553
9296	4809.93	1	0	1	0	0	0	0.00995892
9298	4809.97	1	0	1	0	0	0	0.0099667
9300	4810	1	0	1	0	0	0	0.00998497
9302	4810.03	1	0	1	0	0	0	0.00995824
9304	4810.07	1	0	1	0	0	0	0.00997245
9306	4810.1	1	0	1	0	0	0	0.0100239
9308	4810.13	1	0	1	0	0	0	0.00997008
9310	4810.17	1	0	1	0	0	0	0.0099359
9312	4810.2	1	0	1	0	0	0	0.0099843
9314	4810.23	1	0	1	0	0	0	0.00998667
9316	4810.27	1	0	1	0	0	0	0.00995553
9318	4810.3	1	0	1	0	0	0	0.00998294
9320	4810.33	1	0	1	0	0	0	0.0100087
9322	4810.37	1	0	1	0	0	0	0.0100168
9324	4810.4	1	0	1	0	0	0	0.0100249
9326	4810.43	1	0	1	0	0	0	0.0100205
9328	4810.47	1	0	1	0	0	0	0.0100269
9330	4810.5	1	0	1	0	0	0	0.0100164
9332	4810.53	1	0	1	0	0	0	0.00997144
9334	4810.57	1	0	1	0	0	0	0.010012
9336	4810.6	1	0	1	0	0	0	0.00998328
9338	4810.63	1	0	1	0	0	0	0.0100313
9340	4810.67	1	0	1	0	0	0	0.0099958
9342	4810.7	1	0	1	0	0	0	0.0100337
9344	4810.73	1	0	1	0	0	0	0.00997685
9346	4810.77	1	0	1	0	0	0	0.0100273
9348	4810.8	1	0	1	0	0	0	0.0100046
9350	4810.83	1	0	1	0	0	0	0.0100087
9352	4810.87	1	0	1	0	0	0	0.0099931
9354	4810.9	1	0	1	0	0	0	0.00997922
9356	4810.93	1	0	1	0	0	0	0.0100188
9358	4810.97	1	0	1	0	0	0	0.0100083
9360	4811	1	0	1	0	0	0	0.00998937
9362	4811.03	1	0	1	0	0	0	0.0100601
9364	4811.07	1	0	1	0	0	0	0.00998633
9366	4811.1	1	0	1	0	0	0	0.0100181
9368	4811.13	1	0	1	0	0	0	0.0100273
9370	4811.17	1	0	1	0	0	0	0.0100039
9372	4811.2	1	0	1	0	0	0	0.00997482
9374	4811.23	1	0	1	0	0	0	0.00999885
9376	4811.27	1	0	1	0	0	0	0.0100164
9378	4811.3	1	0	1	0	0	0	0.0100039
9380	4811.33	1	0	1	0	0	0	0.010012
9382	4811.37	1	0	1	0	0	0	0.0100286
9384	4811.4	1	0	1	0	0	0	0.010076
9386	4811.43	1	0	1	0	0	0	0.0100141
9388	4811.47	1	0	1	0	0	0	0.0100503
9390	4811.5	1	0	1	0	0	0	0.0100117
9392	4811.53	1	0	1	0	0	0	0.010031
9394	4811.57	1	0	1	0	0	0	0.0100361
9396	4811.6	1	0	1	0	0	0	0.0100486
9398	4811.63	1	0	1	0	0	0	0.0100432
9400	4811.67	1	0	1	0	0	0	0.0100164
9402	4811.7	1	0	1	0	0	0	0.0100022
9404	4811.73	1	0	1	0	0	0	0.0100395
9406	4811.77	1	0	1	0	0	0	0.0100134
9408	4811.8	1	0	1	0	0	0	0.0100631
9410	4811.83	1	0	1	0	0	0	0.0100005
9412	4811.87	1	0	1	0	0	0	0.0100117
9414	4811.9	1	0	1	0	0	0	0.0100083
9416	4811.93	1	0	1	0	0	0	0.0100117
9418	4811.97	1	0	1	0	0	0	0.0100361
9420	4812	1	0	1	0	0	0	0.0100415
9422	4812.03	1	0	1	0	0	0	0.0100151
9424	4812.07	1	0	1	0	0	0	0.0100134
9426	4812.1	1	0	1	0	0	0	0.0100479
9428	4812.13	1	0	1	0	0	0	0.0100076
9430	4812.17	1	0	1	0	0	0	0.00996467
9432	4812.2	1	0	1	0	0	0	0.00998836
9434	4812.23	1	0	1	0	0	0	0.00998633
9436	4812.27	1	0	1	0	0	0	0.0100344
9438	4812.3	1	0	1	0	0	0	0.0100032
9440	4812.33	1	0	1	0	0	0	0.0100296
9442	4812.37	1	0	1	0	0	0	0.010032
9444	4812.4	1	0	1	0	0	0	0.0100645
9446	4812.43	1	0	1	0	0	0	0.0100709
9448	4812.47	1	0	1	0	0	0	0.0100073
9450	4812.5	1	0	1	0	0	0	0.0100296
9452	4812.53	1	0	1	0	0	0	0.00999005
9454	4812.57	1	0	1	0	0	0	0.00999005
9456	4812.6	1	0	1	0	0	0	0.0100337
9458	4812.63	1	0	1	0	0	0	0.0100158
9460	4812.67	1	0	1	0	0	0	0.0100066
9462	4812.7	1	0	1	0	0	0	0.009987
9464	4812.73	1	0	1	0	0	0	0.0100361
9466	4812.77	1	0	1	0	0	0	0.0100327
9468	4812.8	1	0	1	0	0	0	0.00999648
9470	4812.83	1	0	1	0	0	0	0.0100232
9472	4812.87	1	0	1	0	0	0	0.00998633
9474	4812.9	1	0	1	0	0	0	0.0100009
9476	4812.93	1	0	1	0	0	0	0.01003
9478	4812.97	1	0	1	0	0	0	0.0100259
9480	4813	1	0	1	0	0	0	0.0100208
9482	4813.03	1	0	1	0	0	0	0.0100767
9484	4813.07	1	0	1	0	0	0	0.0100631
9486	4813.1	1	0	1	0	0	0	0.0100625
9488	4813.13	1	0	1	0	0	0	0.0100286
9490	4813.17	1	0	1	0	0	0	0.01003
9492	4813.2	1	0	1	0	0	0	0.0100313
9494	4813.23	1	0	1	0	0	0	0.00999107
9496	4813.27	1	0	1	0	0	0	0.00999953
9498	4813.3	1	0	1	0	0	0	0.00998362
9500	4813.33	1	0	1	0	0	0	0.0100158
9502	4813.37	1	0	1	0	0	0	0.0100259
9504	4813.4	1	0	1	0	0	0	0.0100337
9506	4813.43	1	0	1	0	0	0	0.0099843
9508	4813.47	1	0	1	0	0	0	0.0100198
9510	4813.5	1	0	1	0	0	0	0.0100175
9512	4813.53	1	0	1	0	0	0	0.0100344
9514	4813.57	1	0	1	0	0	0	0.0100063
9516	4813.6	1	0	1	0	0	0	0.0100388
9518	4813.63	1	0	1	0	0	0	0.00998971
9520	4813.67	1	0	1	0	0	0	0.0100229
9522	4813.7	1	0	1	0	0	0	0.010054
9524	4813.73	1	0	1	0	0	0	0.00999479
9526	4813.77	1	0	1	0	0	0	0.00998633
9528	4813.8	1	0	1	0	0	0	0.00997719
9530	4813.83	1	0	1	0	0	0	0.0100161
9532	4813.87	1	0	1	0	0	0	0.0100083
9534	4813.9	1	0	1	0	0	0	0.00999885
9536	4813.93	1	0	1	0	0	0	0.00999411
9538	4813.97	1	0	1	0	0	0	0.0100185
9540	4814	1	0	1	0	0	0	0.0100012
9542	4814.03	1	0	1	0	0	0	0.00996129
9544	4814.07	1	0	1	0	0	0	0.0100083
9546	4814.1	1	0	1	0	0	0	0.010006
9548	4814.13	1	0	1	0	0	0	0.00998464
9550	4814.17	1	0	1	0	0	0	0.0100016
9552	4814.2	1	0	1	0	0	0	0.00999953
9554	4814.23	1	0	1	0	0	0	0.0099975
9556	4814.27	1	0	1	0	0	0	0.00998802
9558	4814.3	1	0	1	0	0	0	0.00992914
9560	4814.33	1	0	1	0	0	0	0.00995553
9562	4814.37	1	0	1	0	0	0	0.00997922
9564	4814.4	1	0	1	0	0	0	0.00998734
9566	4814.43	1	0	1	0	0	0	0.00995215
9568	4814.47	1	0	1	0	0	0	0.0100093
9570	4814.5	1	0	1	0	0	0	0.00998057
9572	4814.53	1	0	1	0	0	0	0.00997651
9574	4814.57	1	0	1	0	0	0	0.00993929
9576	4814.6	1	0	1	0	0	0	0.00995282
9578	4814.63	1	0	1	0	0	0	0.0100016
9580	4814.67	1	0	1	0	0	0	0.0100107
9582	4814.7	1	0	1	0	0	0	0.0100219
9584	4814.73	1	0	1	0	0	0	0.0100188
9586	4814.77	1	0	1	0	0	0	0.0100127
9588	4814.8	1	0	1	0	0	0	0.0100154
9590	4814.83	1	0	1	0	0	0	0.010029
9592	4814.87	1	0	1	0	0	0	0.0100818
9594	4814.9	1	0	1	0	0	0	0.0100933
9596	4814.93	1	0	1	0	0	0	0.0100696
9598	4814.97	1	0	1	0	0	0	0.0100049
9600	4815	1	0	1	0	0	0	0.0100303
9602	4815.03	1	0	1	0	0	0	0.00998227
9604	4815.07	1	0	1	0	0	0	0.00996704
9606	4815.1	1	0	1	0	0	0	0.01001
9608	4815.13	1	0	1	0	0	0	0.0100307
9610	4815.17	1	0	1	0	0	0	0.00997381
9612	4815.2	1	0	1	0	0	0	0.00999479
9614	4815.23	1	0	1	0	0	0	0.00993827
9616	4815.27	1	0	1	0	0	0	0.00999547
9618	4815.3	1	0	1	0	0	0	0.00996772
9620	4815.33	1	0	1	0	0	0	0.00996535
9622	4815.37	1	0	1	0	0	0	0.00995756
9624	4815.4	1	0	1	0	0	0	0.00994978
9626	4815.43	1	0	1	0	0	0	0.0099931
9628	4815.47	1	0	1	0	0	0	0.00993455
9630	4815.5	1	0	1	0	0	0	0.00996332
9632	4815.53	1	0	1	0	0	0	0.00996873
9634	4815.57	1	0	1	0	0	0	0.00997313
9636	4815.6	1	0	1	0	0	0	0.00994538
9638	4815.63	1	0	1	0	0	0	0.0099799
9640	4815.67	1	0	1	0	0	0	0.00997381
9642	4815.7	1	0	1	0	0	0	0.00994504
9644	4815.73	1	0	1	0	0	0	0.00999073
9646	4815.77	1	0	1	0	0	0	0.00994673
9648	4815.8	1	0	1	0	0	0	0.00999682
9650	4815.83	1	0	1	0	0	0	0.00998159
9652	4815.87	1	0	1	0	0	0	0.00998057
9654	4815.9	1	0	1	0	0	0	0.0100405
9656	4815.93	1	0	1	0	0	0	0.00995384
9658	4815.97	1	0	1	0	0	0	0.00997313
9660	4816	1	0	1	0	0	0	0.00994233
9662	4816.03	1	0	1	0	0	0	0.00991932
9664	4816.07	1	0	1	0	0	0	0.00997956
9666	4816.1	1	0	1	0	0	0	0.00994978
9668	4816.13	1	0	1	0	0	0	0.00995689
9670	4816.17	1	0	1	0	0	0	0.00995215
9672	4816.2	1	0	1	0	0	0	0.00987634
9674	4816.23	1	0	1	0	0	0	0.00990003
9676	4816.27	1	0	1	0	0	0	0.00995722
9678	4816.3	1	0	1	0	0	0	0.00999817
9680	4816.33	1	0	1	0	0	0	0.00996264
9682	4816.37	1	0	1	0	0	0	0.0100242
9684	4816.4	1	0	1	0	0	0	0.00999276
9686	4816.43	1	0	1	0	0	0	0.0100276
9688	4816.47	1	0	1	0	0	0	0.0100344
9690	4816.5	1	0	1	0	0	0	0.0100432
9692	4816.53	1	0	1	0	0	0	0.0100401
9694	4816.57	1	0	1	0	0	0	0.0100208
9696	4816.6	1	0	1	0	0	0	0.0100611
9698	4816.63	1	0	1	0	0	0	0.010033
9700	4816.67	1	0	1	0	0	0	0.010012
9702	4816.7	1	0	1	0	0	0	0.00997008
9704	4816.73	1	0	1	0	0	0	0.0099958
9706	4816.77	1	0	1	0	0	0	0.00999479
9708	4816.8	1	0	1	0	0	0	0.00996602
9710	4816.83	1	0	1	0	0	0	0.00999682
9712	4816.87	1	0	1	0	0	0	0.00996907
9714	4816.9	1	0	1	0	0	0	0.0100056
9716	4816.93	1	0	1	0	0	0	0.00997685
9718	4816.97	1	0	1	0	0	0	0.0099755
9720	4817	1	0	1	0	0	0	0.00995215
9722	4817.03	1	0	1	0	0	0	0.0099623
9724	4817.07	1	0	1	0	0	0	0.00994639
9726	4817.1	1	0	1	0	0	0	0.0100032
9728	4817.13	1	0	1	0	0	0	0.00996433
9730	4817.17	1	0	1	0	0	0	0.00995722
9732	4817.2	1	0	1	0	0	0	0.0100002
9734	4817.23	1	0	1	0	0	0	0.0100134
9736	4817.27	1	0	1	0	0	0	0.010034
9738	4817.3	1	0	1	0	0	0	0.0100361
9740	4817.33	1	0	1	0	0	0	0.00998261
9742	4817.37	1	0	1	0	0	0	0.0100303
9744	4817.4	1	0	1	0	0	0	0.00994436
9746	4817.43	1	0	1	0	0	0	0.0100005
9748	4817.47	1	0	1	0	0	0	0.00998328
9750	4817.5	1	0	1	0	0	0	0.0100104
9752	4817.53	1	0	1	0	0	0	0.00998091
9754	4817.57	1	0	1	0	0	0	0.00997245
9756	4817.6	1	0	1	0	0	0	0.00996264
9758	4817.63	1	0	1	0	0	0	0.0100144
9760	4817.67	1	0	1	0	0	0	0.0100286
9762	4817.7	1	0	1	0	0	0	0.00999343
9764	4817.73	1	0	1	0	0	0	0.0099623
9766	4817.77	1	0	1	0	0	0	0.0100537
9768	4817.8	1	0	1	0	0	0	0.00998904
9770	4817.83	1	0	1	0	0	0	0.00997414
9772	4817.87	1	0	1	0	0	0	0.00999919
9774	4817.9	1	0	1	0	0	0	0.0099887
9776	4817.93	1	0	1	0	0	0	0.00994301
9778	4817.97	1	0	1	0	0	0	0.0099887
9780	4818	1	0	1	0	0	0	0.00996467
9782	4818.03	1	0	1	0	0	0	0.00998396
9784	4818.07	1	0	1	0	0	0	0.0099843
9786	4818.1	1	0	1	0	0	0	0.00995553
9788	4818.13	1	0	1	0	0	0	0.00997211
9790	4818.17	1	0	1	0	0	0	0.00999919
9792	4818.2	1	0	1	0	0	0	0.0100114
9794	4818.23	1	0	1	0	0	0	0.0100158
9796	4818.27	1	0	1	0	0	0	0.0100063
9798	4818.3	1	0	1	0	0	0	0.00999242
9800	4818.33	1	0	1	0	0	0	0.0100066
9802	4818.37	1	0	1	0	0	0	0.010031
9804	4818.4	1	0	1	0	0	0	0.0100117
9806	4818.43	1	0	1	0	0	0	0.00999716
9808	4818.47	1	0	1	0	0	0	0.00997042
9810	4818.5	1	0	1	0	0	0	0.00999648
9812	4818.53	1	0	1	0	0	0	0.0100256
9814	4818.57	1	0	1	0	0	0	0.00996568
9816	4818.6	1	0	1	0	0	0	0.00999547
9818	4818.63	1	0	1	0	0	0	0.00998125
9820	4818.67	1	0	1	0	0	0	0.00995486
9822	4818.7	1	0	1	0	0	0	0.010009
9824	4818.73	1	0	1	0	0	0	0.00995486
9826	4818.77	1	0	1	0	0	0	0.00999276
9828	4818.8	1	0	1	0	0	0	0.00997854
9830	4818.83	1	0	1	0	0	0	0.0099667
9832	4818.87	1	0	1	0	0	0	0.00997245
9834	4818.9	1	0	1	0	0	0	0.00999614
9836	4818.93	1	0	1	0	0	0	0.00997516
9838	4818.97	1	0	1	0	0	0	0.00995215
9840	4819	1	0	1	0	0	0	0.00995925
9842	4819.03	1	0	1	0	0	0	0.00995249
9844	4819.07	1	0	1	0	0	0	0.00998261
9846	4819.1	1	0	1	0	0	0	0.00995993
9848	4819.13	1	0	1	0	0	0	0.00996704
9850	4819.17	1	0	1	0	0	0	0.00998024
9852	4819.2	1	0	1	0	0	0	0.0100029
9854	4819.23	1	0	1	0	0	0	0.00993083
9856	4819.27	1	0	1	0	0	0	0.00997279
9858	4819.3	1	0	1	0	0	0	0.00994775
9860	4819.33	1	0	1	0	0	0	0.00996704
9862	4819.37	1	0	1	0	0	0	0.00996975
9864	4819.4	1	0	1	0	0	0	0.00997956
9866	4819.43	1	0	1	0	0	0	0.0099623
9868	4819.47	1	0	1	0	0	0	0.00996196
9870	4819.5	1	0	1	0	0	0	0.00994741
9872	4819.53	1	0	1	0	0	0	0.00999716
9874	4819.57	1	0	1	0	0	0	0.00996839
9876	4819.6	1	0	1	0	0	0	0.00999513
9878	4819.63	1	0	1	0	0	0	0.00997076
9880	4819.67	1	0	1	0	0	0	0.00993523
9882	4819.7	1	0	1	0	0	0	0.00991661
9884	4819.73	1	0	1	0	0	0	0.00993726
9886	4819.77	1	0	1	0	0	0	0.00987736
9888	4819.8	1	0	1	0	0	0	0.00995079
9890	4819.83	1	0	1	0	0	0	0.00996873
9892	4819.87	1	0	1	0	0	0	0.00995925
9894	4819.9	1	0	1	0	0	0	0.00995824
9896	4819.93	1	0	1	0	0	0	0.009942
9898	4819.97	1	0	1	0	0	0	0.00992947
9900	4820	1	0	1	0	0	0	0.00998091
9902	4820.03	1	0	1	0	0	0	0.00996602
9904	4820.07	1	0	1	0	0	0	0.00995892
9906	4820.1	1	0	1	0	0	0	0.00999648
9908	4820.13	1	0	1	0	0	0	0.0099579
9910	4820.17	1	0	1	0	0	0	0.00997787
9912	4820.2	1	0	1	0	0	0	0.00994572
9914	4820.23	1	0	1	0	0	0	0.00995418
9916	4820.27	1	0	1	0	0	0	0.00998328
9918	4820.3	1	0	1	0	0	0	0.0099244
9920	4820.33	1	0	1	0	0	0	0.00986754
9922	4820.37	1	0	1	0	0	0	0.00992846
9924	4820.4	1	0	1	0	0	0	0.00992507
9926	4820.43	1	0	1	0	0	0	0.00992101
9928	4820.47	1	0	1	0	0	0	0.00993658
9930	4820.5	1	0	1	0	0	0	0.00989191
9932	4820.53	1	0	1	0	0	0	0.00992203
9934	4820.57	1	0	1	0	0	0	0.00993184
9936	4820.6	1	0	1	0	0	0	0.00991458
9938	4820.63	1	0	1	0	0	0	0.0099244
9940	4820.67	1	0	1	0	0	0	0.00993929
9942	4820.7	1	0	1	0	0	0	0.00990748
9944	4820.73	1	0	1	0	0	0	0.00993184
9946	4820.77	1	0	1	0	0	0	0.00996772
9948	4820.8	1	0	1	0	0	0	0.00987397
9950	4820.83	1	0	1	0	0	0	0.00987837
9952	4820.87	1	0	1	0	0	0	0.00987871
9954	4820.9	1	0	1	0	0	0	0.00991628
9956	4820.93	1	0	1	0	0	0	0.0098804
9958	4820.97	1	0	1	0	0	0	0.00990274
9960	4821	1	0	1	0	0	0	0.00989597
9962	4821.03	1	0	1	0	0	0	0.00990578
9964	4821.07	1	0	1	0	0	0	0.00986957
9966	4821.1	1	0	1	0	0	0	0.00986382
9968	4821.13	1	0	1	0	0	0	0.00984758
9970	4821.17	1	0	1	0	0	0	0.00990815
9972	4821.2	1	0	1	0	0	0	0.00989834
9974	4821.23	1	0	1	0	0	0	0.00984555
9976	4821.27	1	0	1	0	0	0	0.00989834
9978	4821.3	1	0	1	0	0	0	0.00989191
9980	4821.33	1	0	1	0	0	0	0.00987093
9982	4821.37	1	0	1	0	0	0	0.00988886
9984	4821.4	1	0	1	0	0	0	0.00986619
9986	4821.43	1	0	1	0	0	0	0.00984284
9988	4821.47	1	0	1	0	0	0	0.00987736
9990	4821.5	1	0	1	0	0	0	0.00988616
9992	4821.53	1	0	1	0	0	0	0.00988413
9994	4821.57	1	0	1	0	0	0	0.00988514
9996	4821.6	1	0	1	0	0	0	0.00986653
9998	4821.63	1	0	1	0	0	0	0.00987364
10000	4821.67	1	0	1	0	0	0	0.00982456
10002	4821.7	1	0	1	0	0	0	0.00982287
10004	4821.73	1	0	1	0	0	0	0.00985671
10006	4821.77	1	0	1	0	0	0	0.00985875
10008	4821.8	1	0	1	0	0	0	0.00989056
10010	4821.83	1	0	1	0	0	0	0.00989732
10012	4821.87	1	0	1	0	0	0	0.00990883
10014	4821.9	1	0	1	0	0	0	0.00989597
10016	4821.93	1	0	1	0	0	0	0.00988582
10018	4821.97	1	0	1	0	0	0	0.00989225
10020	4822	1	0	1	0	0	0	0.00986822
10022	4822.03	1	0	1	0	0	0	0.00988683
10024	4822.07	1	0	1	0	0	0	0.00992744
10026	4822.1	1	0	1	0	0	0	0.00986619
10028	4822.13	1	0	1	0	0	0	0.00989191
10030	4822.17	1	0	1	0	0	0	0.00988751
10032	4822.2	1	0	1	0	0	0	0.00987262
10034	4822.23	1	0	1	0	0	0	0.00988988
10036	4822.27	1	0	1	0	0	0	0.00987905
10038	4822.3	1	0	1	0	0	0	0.00989563
10040	4822.33	1	0	1	0	0	0	0.00989394
10042	4822.37	1	0	1	0	0	0	0.009942
10044	4822.4	1	0	1	0	0	0	0.00991458
10046	4822.43	1	0	1	0	0	0	0.00989529
10048	4822.47	1	0	1	0	0	0	0.00994876
10050	4822.5	1	0	1	0	0	0	0.00988345
10052	4822.53	1	0	1	0	0	0	0.00989563
10054	4822.57	1	0	1	0	0	0	0.0098557
10056	4822.6	1	0	1	0	0	0	0.00987803
10058	4822.63	1	0	1	0	0	0	0.00990071
10060	4822.67	1	0	1	0	0	0	0.00989665
10062	4822.7	1	0	1	0	0	0	0.00987973
10064	4822.73	1	0	1	0	0	0	0.00986721
10066	4822.77	1	0	1	0	0	0	0.00986416
10068	4822.8	1	0	1	0	0	0	0.00988345
10070	4822.83	1	0	1	0	0	0	0.0098733
10072	4822.87	1	0	1	0	0	0	0.0098865
10074	4822.9	1	0	1	0	0	0	0.00987025
10076	4822.93	1	0	1	0	0	0	0.00990037
10078	4822.97	1	0	1	0	0	0	0.0099068
10080	4823	1	0	1	0	0	0	0.00989293
10082	4823.03	1	0	1	0	0	0	0.0099156
10084	4823.07	1	0	1	0	0	0	0.0099403
10086	4823.1	1	0	1	0	0	0	0.00993387
10088	4823.13	1	0	1	0	0	0	0.00991221
10090	4823.17	1	0	1	0	0	0	0.00990985
10092	4823.2	1	0	1	0	0	0	0.00993286
10094	4823.23	1	0	1	0	0	0	0.00990037
10096	4823.27	1	0	1	0	0	0	0.00989766
10098	4823.3	1	0	1	0	0	0	0.00987364
10100	4823.33	1	0	1	0	0	0	0.00987059
10102	4823.37	1	0	1	0	0	0	0.00991797
10104	4823.4	1	0	1	0	0	0	0.00994707
10106	4823.43	1	0	1	0	0	0	0.00990409
10108	4823.47	1	0	1	0	0	0	0.00989496
10110	4823.5	1	0	1	0	0	0	0.00993286
10112	4823.53	1	0	1	0	0	0	0.00991458
10114	4823.57	1	0	1	0	0	0	0.00990883
10116	4823.6	1	0	1	0	0	0	0.00987093
10118	4823.63	1	0	1	0	0	0	0.00993184
10120	4823.67	1	0	1	0	0	0	0.00991763
10122	4823.7	1	0	1	0	0	0	0.00990917
10124	4823.73	1	0	1	0	0	0	0.00992575
10126	4823.77	1	0	1	0	0	0	0.00990985
10128	4823.8	1	0	1	0	0	0	0.00989089
10130	4823.83	1	0	1	0	0	0	0.00988988
10132	4823.87	1	0	1	0	0	0	0.00987431
10134	4823.9	1	0	1	0	0	0	0.00989022
10136	4823.93	1	0	1	0	0	0	0.00985638
10138	4823.97	1	0	1	0	0	0	0.0098645
10140	4824	1	0	1	0	0	0	0.00992981
10142	4824.03	1	0	1	0	0	0	0.00991323
10144	4824.07	1	0	1	0	0	0	0.00991323
10146	4824.1	1	0	1	0	0	0	0.00996941
10148	4824.13	1	0	1	0	0	0	0.00992711
10150	4824.17	1	0	1	0	0	0	0.00994267
10152	4824.2	1	0	1	0	0	0	0.00992304
10154	4824.23	1	0	1	0	0	0	0.00988886
10156	4824.27	1	0	1	0	0	0	0.00990003
10158	4824.3	1	0	1	0	0	0	0.00988582
10160	4824.33	1	0	1	0	0	0	0.00991763
10162	4824.37	1	0	1	0	0	0	0.00988345
10164	4824.4	1	0	1	0	0	0	0.00990815
10166	4824.43	1	0	1	0	0	0	0.00984216
10168	4824.47	1	0	1	0	0	0	0.00989597
10170	4824.5	1	0	1	0	0	0	0.00989394
10172	4824.53	1	0	1	0	0	0	0.0098804
10174	4824.57	1	0	1	0	0	0	0.00990883
10176	4824.6	1	0	1	0	0	0	0.00991831
10178	4824.63	1	0	1	0	0	0	0.00988988
10180	4824.67	1	0	1	0	0	0	0.00991154
10182	4824.7	1	0	1	0	0	0	0.00989529
10184	4824.73	1	0	1	0	0	0	0.00993557
10186	4824.77	1	0	1	0	0	0	0.00990409
10188	4824.8	1	0	1	0	0	0	0.00990342
10190	4824.83	1	0	1	0	0	0	0.00990105
10192	4824.87	1	0	1	0	0	0	0.00990883
10194	4824.9	1	0	1	0	0	0	0.00996501
10196	4824.93	1	0	1	0	0	0	0.0099579
10198	4824.97	1	0	1	0	0	0	0.0099244
10200	4825	1	0	1	0	0	0	0.00990612
10202	4825.03	1	0	1	0	0	0	0.00990274
10204	4825.07	1	0	1	0	0	0	0.00990951
10206	4825.1	1	0	1	0	0	0	0.00986517
10208	4825.13	1	0	1	0	0	0	0.00989326
10210	4825.17	1	0	1	0	0	0	0.00987127
10212	4825.2	1	0	1	0	0	0	0.00986585
10214	4825.23	1	0	1	0	0	0	0.00985807
10216	4825.27	1	0	1	0	0	0	0.0098777
10218	4825.3	1	0	1	0	0	0	0.0098425
10220	4825.33	1	0	1	0	0	0	0.00984859
10222	4825.37	1	0	1	0	0	0	0.00985976
10224	4825.4	1	0	1	0	0	0	0.00981712
10226	4825.43	1	0	1	0	0	0	0.00981746
10228	4825.47	1	0	1	0	0	0	0.00984724
10230	4825.5	1	0	1	0	0	0	0.00981746
10232	4825.53	1	0	1	0	0	0	0.00981204
10234	4825.57	1	0	1	0	0	0	0.0098645
10236	4825.6	1	0	1	0	0	0	0.00980358
10238	4825.63	1	0	1	0	0	0	0.00980528
10240	4825.67	1	0	1	0	0	0	0.009809
10242	4825.7	1	0	1	0	0	0	0.00981644
10244	4825.73	1	0	1	0	0	0	0.0098381
10246	4825.77	1	0	1	0	0	0	0.00982829
10248	4825.8	1	0	1	0	0	0	0.00984182
10250	4825.83	1	0	1	0	0	0	0.0098266
10252	4825.87	1	0	1	0	0	0	0.00981069
10254	4825.9	1	0	1	0	0	0	0.00983404
10256	4825.93	1	0	1	0	0	0	0.00987262
10258	4825.97	1	0	1	0	0	0	0.00986484
10260	4826	1	0	1	0	0	0	0.00982626
10262	4826.03	1	0	1	0	0	0	0.00985875
10264	4826.07	1	0	1	0	0	0	0.00985265
10266	4826.1	1	0	1	0	0	0	0.00990139
10268	4826.13	1	0	1	0	0	0	0.00982456
10270	4826.17	1	0	1	0	0	0	0.00985435
10272	4826.2	1	0	1	0	0	0	0.0098293
10274	4826.23	1	0	1	0	0	0	0.00985401
10276	4826.27	1	0	1	0	0	0	0.00983539
10278	4826.3	1	0	1	0	0	0	0.00986653
10280	4826.33	1	0	1	0	0	0	0.00984453
10282	4826.37	1	0	1	0	0	0	0.00989902
10284	4826.4	1	0	1	0	0	0	0.00988819
10286	4826.43	1	0	1	0	0	0	0.00985908
10288	4826.47	1	0	1	0	0	0	0.0098936
10290	4826.5	1	0	1	0	0	0	0.00985164
10292	4826.53	1	0	1	0	0	0	0.00988683
10294	4826.57	1	0	1	0	0	0	0.00984419
10296	4826.6	1	0	1	0	0	0	0.00988108
10298	4826.63	1	0	1	0	0	0	0.00986822
10300	4826.67	1	0	1	0	0	0	0.00983539
10302	4826.7	1	0	1	0	0	0	0.00988819
10304	4826.73	1	0	1	0	0	0	0.00987837
10306	4826.77	1	0	1	0	0	0	0.0098777
10308	4826.8	1	0	1	0	0	0	0.00991289
10310	4826.83	1	0	1	0	0	0	0.00992643
10312	4826.87	1	0	1	0	0	0	0.00989529
10314	4826.9	1	0	1	0	0	0	0.00988988
10316	4826.93	1	0	1	0	0	0	0.0098689
10318	4826.97	1	0	1	0	0	0	0.00988074
10320	4827	1	0	1	0	0	0	0.00985773
10322	4827.03	1	0	1	0	0	0	0.00986856
10324	4827.07	1	0	1	0	0	0	0.00989056
10326	4827.1	1	0	1	0	0	0	0.00989902
10328	4827.13	1	0	1	0	0	0	0.00989462
10330	4827.17	1	0	1	0	0	0	0.00987194
10332	4827.2	1	0	1	0	0	0	0.00989191
10334	4827.23	1	0	1	0	0	0	0.0098821
10336	4827.27	1	0	1	0	0	0	0.00983506
10338	4827.3	1	0	1	0	0	0	0.0099447
10340	4827.33	1	0	1	0	0	0	0.00991323
10342	4827.37	1	0	1	0	0	0	0.00987364
10344	4827.4	1	0	1	0	0	0	0.00989259
10346	4827.43	1	0	1	0	0	0	0.00986551
10348	4827.47	1	0	1	0	0	0	0.00986754
10350	4827.5	1	0	1	0	0	0	0.00985976
10352	4827.53	1	0	1	0	0	0	0.00985333
10354	4827.57	1	0	1	0	0	0	0.00987736
10356	4827.6	1	0	1	0	0	0	0.00984182
10358	4827.63	1	0	1	0	0	0	0.00990375
10360	4827.67	1	0	1	0	0	0	0.00982896
10362	4827.7	1	0	1	0	0	0	0.00987668
10364	4827.73	1	0	1	0	0	0	0.00984081
10366	4827.77	1	0	1	0	0	0	0.00986924
10368	4827.8	1	0	1	0	0	0	0.00987025
10370	4827.83	1	0	1	0	0	0	0.00984622
10372	4827.87	1	0	1	0	0	0	0.00982693
10374	4827.9	1	0	1	0	0	0	0.00984352
10376	4827.93	1	0	1	0	0	0	0.00989428
10378	4827.97	1	0	1	0	0	0	0.00984216
10380	4828	1	0	1	0	0	0	0.00981881
10382	4828.03	1	0	1	0	0	0	0.00984792
10384	4828.07	1	0	1	0	0	0	0.009876
10386	4828.1	1	0	1	0	0	0	0.00987465
10388	4828.13	1	0	1	0	0	0	0.00984995
10390	4828.17	1	0	1	0	0	0	0.00987059
10392	4828.2	1	0	1	0	0	0	0.00987871
10394	4828.23	1	0	1	0	0	0	0.0098266
10396	4828.27	1	0	1	0	0	0	0.00986822
10398	4828.3	1	0	1	0	0	0	0.0098205
10400	4828.33	1	0	1	0	0	0	0.00986078
10402	4828.37	1	0	1	0	0	0	0.00985198
10404	4828.4	1	0	1	0	0	0	0.00986754
10406	4828.43	1	0	1	0	0	0	0.00983201
10408	4828.47	1	0	1	0	0	0	0.00985401
10410	4828.5	1	0	1	0	0	0	0.00982829
10412	4828.53	1	0	1	0	0	0	0.00982084
10414	4828.57	1	0	1	0	0	0	0.00982592
10416	4828.6	1	0	1	0	0	0	0.00981171
10418	4828.63	1	0	1	0	0	0	0.00990883
10420	4828.67	1	0	1	0	0	0	0.00988548
10422	4828.7	1	0	1	0	0	0	0.00986687
10424	4828.73	1	0	1	0	0	0	0.0098804
10426	4828.77	1	0	1	0	0	0	0.00987871
10428	4828.8	1	0	1	0	0	0	0.0098733
10430	4828.83	1	0	1	0	0	0	0.00988311
10432	4828.87	1	0	1	0	0	0	0.00984622
10434	4828.9	1	0	1	0	0	0	0.00987905
10436	4828.93	1	0	1	0	0	0	0.00988074
10438	4828.97	1	0	1	0	0	0	0.00989089
10440	4829	1	0	1	0	0	0	0.00987465
10442	4829.03	1	0	1	0	0	0	0.00984081
10444	4829.07	1	0	1	0	0	0	0.00987499
10446	4829.1	1	0	1	0	0	0	0.00984521
10448	4829.13	1	0	1	0	0	0	0.00988446
10450	4829.17	1	0	1	0	0	0	0.00987567
10452	4829.2	1	0	1	0	0	0	0.00993117
10454	4829.23	1	0	1	0	0	0	0.00992034
10456	4829.27	1	0	1	0	0	0	0.0098804
10458	4829.3	1	0	1	0	0	0	0.00989699
10460	4829.33	1	0	1	0	0	0	0.00988683
10462	4829.37	1	0	1	0	0	0	0.00990714
10464	4829.4	1	0	1	0	0	0	0.00986754
10466	4829.43	1	0	1	0	0	0	0.00988311
10468	4829.47	1	0	1	0	0	0	0.00992237
10470	4829.5	1	0	1	0	0	0	0.00987803
10472	4829.53	1	0	1	0	0	0	0.00994335
10474	4829.57	1	0	1	0	0	0	0.00994538
10476	4829.6	1	0	1	0	0	0	0.00990545
10478	4829.63	1	0	1	0	0	0	0.00987905
10480	4829.67	1	0	1	0	0	0	0.00988007
10482	4829.7	1	0	1	0	0	0	0.009876
10484	4829.73	1	0	1	0	0	0	0.00990206
10486	4829.77	1	0	1	0	0	0	0.00984995
10488	4829.8	1	0	1	0	0	0	0.00986991
10490	4829.83	1	0	1	0	0	0	0.00990274
10492	4829.87	1	0	1	0	0	0	0.00986314
10494	4829.9	1	0	1	0	0	0	0.00985671
10496	4829.93	1	0	1	0	0	0	0.00991695
10498	4829.97	1	0	1	0	0	0	0.00990815
10500	4830	1	0	1	0	0	0	0.00990071
10502	4830.03	1	0	1	0	0	0	0.00987736
10504	4830.07	1	0	1	0	0	0	0.0099403
10506	4830.1	1	0	1	0	0	0	0.00985773
10508	4830.13	1	0	1	0	0	0	0.00989834
10510	4830.17	1	0	1	0	0	0	0.00989597
10512	4830.2	1	0	1	0	0	0	0.00993455
10514	4830.23	1	0	1	0	0	0	0.00986822
10516	4830.27	1	0	1	0	0	0	0.00991932
10518	4830.3	1	0	1	0	0	0	0.00987905
10520	4830.33	1	0	1	0	0	0	0.00986348
10522	4830.37	1	0	1	0	0	0	0.0099112
10524	4830.4	1	0	1	0	0	0	0.0098689
10526	4830.43	1	0	1	0	0	0	0.00989225
10528	4830.47	1	0	1	0	0	0	0.00985976
10530	4830.5	1	0	1	0	0	0	0.00986856
10532	4830.53	1	0	1	0	0	0	0.00981543
10534	4830.57	1	0	1	0	0	0	0.00985705
10536	4830.6	1	0	1	0	0	0	0.00986957
10538	4830.63	1	0	1	0	0	0	0.00981814
10540	4830.67	1	0	1	0	0	0	0.00986585
10542	4830.7	1	0	1	0	0	0	0.00982253
10544	4830.73	1	0	1	0	0	0	0.00982693
10546	4830.77	1	0	1	0	0	0	0.00983167
10548	4830.8	1	0	1	0	0	0	0.00980764
10550	4830.83	1	0	1	0	0	0	0.00984013
10552	4830.87	1	0	1	0	0	0	0.00986247
10554	4830.9	1	0	1	0	0	0	0.00982389
10556	4830.93	1	0	1	0	0	0	0.00984521
10558	4830.97	1	0	1	0	0	0	0.00980798
10560	4831	1	0	1	0	0	0	0.00980832
10562	4831.03	1	0	1	0	0	0	0.00977719
10564	4831.07	1	0	1	0	0	0	0.00977956
10566	4831.1	1	0	1	0	0	0	0.00982355
10568	4831.13	1	0	1	0	0	0	0.00983167
10570	4831.17	1	0	1	0	0	0	0.00984487
10572	4831.2	1	0	1	0	0	0	0.00983167
10574	4831.23	1	0	1	0	0	0	0.00980358
10576	4831.27	1	0	1	0	0	0	0.00980121
10578	4831.3	1	0	1	0	0	0	0.00983032
10580	4831.33	1	0	1	0	0	0	0.00987499
10582	4831.37	1	0	1	0	0	0	0.00984521
10584	4831.4	1	0	1	0	0	0	0.0098425
10586	4831.43	1	0	1	0	0	0	0.0098689
10588	4831.47	1	0	1	0	0	0	0.0098733
10590	4831.5	1	0	1	0	0	0	0.00985536
10592	4831.53	1	0	1	0	0	0	0.00986145
10594	4831.57	1	0	1	0	0	0	0.00986247
10596	4831.6	1	0	1	0	0	0	0.00986924
10598	4831.63	1	0	1	0	0	0	0.00986145
10600	4831.67	1	0	1	0	0	0	0.00986991
10602	4831.7	1	0	1	0	0	0	0.0098222
10604	4831.73	1	0	1	0	0	0	0.00984047
10606	4831.77	1	0	1	0	0	0	0.0098645
10608	4831.8	1	0	1	0	0	0	0.00987262
10610	4831.83	1	0	1	0	0	0	0.00983946
10612	4831.87	1	0	1	0	0	0	0.00987837
10614	4831.9	1	0	1	0	0	0	0.00986484
10616	4831.93	1	0	1	0	0	0	0.00985671
10618	4831.97	1	0	1	0	0	0	0.00989293
10620	4832	1	0	1	0	0	0	0.00985908
10622	4832.03	1	0	1	0	0	0	0.00984656
10624	4832.07	1	0	1	0	0	0	0.0098381
10626	4832.1	1	0	1	0	0	0	0.00981441
10628	4832.13	1	0	1	0	0	0	0.00985265
10630	4832.17	1	0	1	0	0	0	0.00989394
10632	4832.2	1	0	1	0	0	0	0.00986721
10634	4832.23	1	0	1	0	0	0	0.00990105
10636	4832.27	1	0	1	0	0	0	0.00987634
10638	4832.3	1	0	1	0	0	0	0.00988582
10640	4832.33	1	0	1	0	0	0	0.00990815
10642	4832.37	1	0	1	0	0	0	0.00988954
10644	4832.4	1	0	1	0	0	0	0.00988074
10646	4832.43	1	0	1	0	0	0	0.00994876
10648	4832.47	1	0	1	0	0	0	0.00985401
10650	4832.5	1	0	1	0	0	0	0.00985705
10652	4832.53	1	0	1	0	0	0	0.00986924
10654	4832.57	1	0	1	0	0	0	0.0098892
10656	4832.6	1	0	1	0	0	0	0.00990748
10658	4832.63	1	0	1	0	0	0	0.00991695
10660	4832.67	1	0	1	0	0	0	0.0098821
10662	4832.7	1	0	1	0	0	0	0.00994944
10664	4832.73	1	0	1	0	0	0	0.00990545
10666	4832.77	1	0	1	0	0	0	0.00995012
10668	4832.8	1	0	1	0	0	0	0.00990037
10670	4832.83	1	0	1	0	0	0	0.00993963
10672	4832.87	1	0	1	0	0	0	0.00988717
10674	4832.9	1	0	1	0	0	0	0.00989089
10676	4832.93	1	0	1	0	0	0	0.00989225
10678	4832.97	1	0	1	0	0	0	0.00987905
10680	4833	1	0	1	0	0	0	0.00986653
10682	4833.03	1	0	1	0	0	0	0.00986856
10684	4833.07	1	0	1	0	0	0	0.00987803
10686	4833.1	1	0	1	0	0	0	0.00982423
10688	4833.13	1	0	1	0	0	0	0.00985401
10690	4833.17	1	0	1	0	0	0	0.00990172
10692	4833.2	1	0	1	0	0	0	0.00985299
10694	4833.23	1	0	1	0	0	0	0.00988785
10696	4833.27	1	0	1	0	0	0	0.00985062
10698	4833.3	1	0	1	0	0	0	0.0098716
10700	4833.33	1	0	1	0	0	0	0.00986179
10702	4833.37	1	0	1	0	0	0	0.00991661
10704	4833.4	1	0	1	0	0	0	0.00991323
10706	4833.43	1	0	1	0	0	0	0.00990849
10708	4833.47	1	0	1	0	0	0	0.00988413
10710	4833.5	1	0	1	0	0	0	0.00987939
10712	4833.53	1	0	1	0	0	0	0.00985435
10714	4833.57	1	0	1	0	0	0	0.00988988
10716	4833.6	1	0	1	0	0	0	0.00988311
10718	4833.63	1	0	1	0	0	0	0.00984792
10720	4833.67	1	0	1	0	0	0	0.00990917
10722	4833.7	1	0	1	0	0	0	0.00985773
10724	4833.73	1	0	1	0	0	0	0.00987973
10726	4833.77	1	0	1	0	0	0	0.00982592
10728	4833.8	1	0	1	0	0	0	0.00989834
10730	4833.83	1	0	1	0	0	0	0.00985232
10732	4833.87	1	0	1	0	0	0	0.00986044
10734	4833.9	1	0	1	0	0	0	0.00987465
10736	4833.93	1	0	1	0	0	0	0.00986856
10738	4833.97	1	0	1	0	0	0	0.0099024
10740	4834	1	0	1	0	0	0	0.00985502
10742	4834.03	1	0	1	0	0	0	0.00988548
10744	4834.07	1	0	1	0	0	0	0.00983133
10746	4834.1	1	0	1	0	0	0	0.00984825
10748	4834.13	1	0	1	0	0	0	0.00984792
10750	4834.17	1	0	1	0	0	0	0.00982592
10752	4834.2	1	0	1	0	0	0	0.00982592
10754	4834.23	1	0	1	0	0	0	0.00978023
10756	4834.27	1	0	1	0	0	0	0.00978835
10758	4834.3	1	0	1	0	0	0	0.00983539
10760	4834.33	1	0	1	0	0	0	0.00985232
10762	4834.37	1	0	1	0	0	0	0.00987059
10764	4834.4	1	0	1	0	0	0	0.00985705
10766	4834.43	1	0	1	0	0	0	0.00993489
10768	4834.47	1	0	1	0	0	0	0.00989225
10770	4834.5	1	0	1	0	0	0	0.00989935
10772	4834.53	1	0	1	0	0	0	0.00988514
10774	4834.57	1	0	1	0	0	0	0.00987668
10776	4834.6	1	0	1	0	0	0	0.00985841
10778	4834.63	1	0	1	0	0	0	0.00986484
10780	4834.67	1	0	1	0	0	0	0.00988379
10782	4834.7	1	0	1	0	0	0	0.00991188
10784	4834.73	1	0	1	0	0	0	0.00989089
10786	4834.77	1	0	1	0	0	0	0.00989462
10788	4834.8	1	0	1	0	0	0	0.0098689
10790	4834.83	1	0	1	0	0	0	0.0099024
10792	4834.87	1	0	1	0	0	0	0.00985401
10794	4834.9	1	0	1	0	0	0	0.00991695
10796	4834.93	1	0	1	0	0	0	0.00987702
10798	4834.97	1	0	1	0	0	0	0.0098804
10800	4835	1	0	1	0	0	0	0.00992338
10802	4835.03	1	0	1	0	0	0	0.00992338
10804	4835.07	1	0	1	0	0	0	0.00987194
10806	4835.1	1	0	1	0	0	0	0.00991966
10808	4835.13	1	0	1	0	0	0	0.00991086
10810	4835.17	1	0	1	0	0	0	0.00987499
10812	4835.2	1	0	1	0	0	0	0.00989191
10814	4835.23	1	0	1	0	0	0	0.00989394
10816	4835.27	1	0	1	0	0	0	0.00984453
10818	4835.3	1	0	1	0	0	0	0.00986213
10820	4835.33	1	0	1	0	0	0	0.00987465
10822	4835.37	1	0	1	0	0	0	0.00987127
10824	4835.4	1	0	1	0	0	0	0.0098222
10826	4835.43	1	0	1	0	0	0	0.00980561
10828	4835.47	1	0	1	0	0	0	0.00985232
10830	4835.5	1	0	1	0	0	0	0.00992271
10832	4835.53	1	0	1	0	0	0	0.00987465
10834	4835.57	1	0	1	0	0	0	0.00984487
10836	4835.6	1	0	1	0	0	0	0.00987567
10838	4835.63	1	0	1	0	0	0	0.00983946
10840	4835.67	1	0	1	0	0	0	0.0097958
10842	4835.7	1	0	1	0	0	0	0.00979783
10844	4835.73	1	0	1	0	0	0	0.00982795
10846	4835.77	1	0	1	0	0	0	0.00980223
10848	4835.8	1	0	1	0	0	0	0.00981238
10850	4835.83	1	0	1	0	0	0	0.00978125
10852	4835.86	1	0	1	0	0	0	0.00980121
10854	4835.9	1	0	1	0	0	0	0.00978531
10856	4835.93	1	0	1	0	0	0	0.00978666
10858	4835.96	1	0	1	0	0	0	0.00983201
10860	4836	1	0	1	0	0	0	0.00977279
10862	4836.03	1	0	1	0	0	0	0.00981441
10864	4836.06	1	0	1	0	0	0	0.009765
10866	4836.1	1	0	1	0	0	0	0.00979174
10868	4836.13	1	0	1	0	0	0	0.00981509
10870	4836.16	1	0	1	0	0	0	0.00977956
10872	4836.2	1	0	1	0	0	0	0.00978666
10874	4836.23	1	0	1	0	0	0	0.00979546
10876	4836.26	1	0	1	0	0	0	0.00984047
10878	4836.3	1	0	1	0	0	0	0.00982253
10880	4836.33	1	0	1	0	0	0	0.00980223
10882	4836.36	1	0	1	0	0	0	0.00978802
10884	4836.4	1	0	1	0	0	0	0.00981644
10886	4836.43	1	0	1	0	0	0	0.00988582
10888	4836.46	1	0	1	0	0	0	0.009876
10890	4836.5	1	0	1	0	0	0	0.00986179
10892	4836.53	1	0	1	0	0	0	0.00983235
10894	4836.56	1	0	1	0	0	0	0.00987567
10896	4836.6	1	0	1	0	0	0	0.00988717
10898	4836.63	1	0	1	0	0	0	0.00985468
10900	4836.66	1	0	1	0	0	0	0.0098557
10902	4836.7	1	0	1	0	0	0	0.00984622
10904	4836.73	1	0	1	0	0	0	0.00982964
10906	4836.76	1	0	1	0	0	0	0.00981374
10908	4836.8	1	0	1	0	0	0	0.00983573
10910	4836.83	1	0	1	0	0	0	0.00978023
10912	4836.86	1	0	1	0	0	0	0.00984792
10914	4836.9	1	0	1	0	0	0	0.00982287
10916	4836.93	1	0	1	0	0	0	0.00978023
10918	4836.96	1	0	1	0	0	0	0.00979445
10920	4837	1	0	1	0	0	0	0.00984995
10922	4837.03	1	0	1	0	0	0	0.00975891
10924	4837.06	1	0	1	0	0	0	0.00976805
10926	4837.1	1	0	1	0	0	0	0.00979275
10928	4837.13	1	0	1	0	0	0	0.00974808
10930	4837.16	1	0	1	0	0	0	0.00980561
10932	4837.2	1	0	1	0	0	0	0.00978768
10934	4837.23	1	0	1	0	0	0	0.00978632
10936	4837.26	1	0	1	0	0	0	0.00978159
10938	4837.3	1	0	1	0	0	0	0.0097579
10940	4837.33	1	0	1	0	0	0	0.00978666
10942	4837.36	1	0	1	0	0	0	0.00978565
10944	4837.4	1	0	1	0	0	0	0.00980223
10946	4837.43	1	0	1	0	0	0	0.00978362
10948	4837.46	1	0	1	0	0	0	0.00981001
10950	4837.5	1	0	1	0	0	0	0.00979242
10952	4837.53	1	0	1	0	0	0	0.00978565
10954	4837.56	1	0	1	0	0	0	0.00983709
10956	4837.6	1	0	1	0	0	0	0.00981137
10958	4837.63	1	0	1	0	0	0	0.00983336
10960	4837.66	1	0	1	0	0	0	0.00979681
10962	4837.7	1	0	1	0	0	0	0.00983032
10964	4837.73	1	0	1	0	0	0	0.00981475
10966	4837.76	1	0	1	0	0	0	0.00980088
10968	4837.8	1	0	1	0	0	0	0.00982017
10970	4837.83	1	0	1	0	0	0	0.00978159
10972	4837.86	1	0	1	0	0	0	0.0098046
10974	4837.9	1	0	1	0	0	0	0.00982321
10976	4837.93	1	0	1	0	0	0	0.00983235
10978	4837.96	1	0	1	0	0	0	0.00981509
10980	4838	1	0	1	0	0	0	0.00978768
10982	4838.03	1	0	1	0	0	0	0.00979411
10984	4838.06	1	0	1	0	0	0	0.00980223
10986	4838.1	1	0	1	0	0	0	0.00980561
10988	4838.13	1	0	1	0	0	0	0.00979512
10990	4838.16	1	0	1	0	0	0	0.00983032
10992	4838.2	1	0	1	0	0	0	0.00981137
10994	4838.23	1	0	1	0	0	0	0.0098205
10996	4838.26	1	0	1	0	0	0	0.00987228
10998	4838.3	1	0	1	0	0	0	0.0098777
11000	4838.33	1	0	1	0	0	0	0.00986247
11002	4838.36	1	0	1	0	0	0	0.00985875
11004	4838.4	1	0	1	0	0	0	0.00986213
11006	4838.43	1	0	1	0	0	0	0.00988176
11008	4838.46	1	0	1	0	0	0	0.0098425
11010	4838.5	1	0	1	0	0	0	0.0098936
11012	4838.53	1	0	1	0	0	0	0.00984995
11014	4838.56	1	0	1	0	0	0	0.00982761
11016	4838.6	1	0	1	0	0	0	0.0098266
11018	4838.63	1	0	1	0	0	0	0.00982626
11020	4838.66	1	0	1	0	0	0	0.00986044
11022	4838.7	1	0	1	0	0	0	0.00982456
11024	4838.73	1	0	1	0	0	0	0.00983404
11026	4838.76	1	0	1	0	0	0	0.00981983
11028	4838.8	1	0	1	0	0	0	0.00986754
11030	4838.83	1	0	1	0	0	0	0.00984758
11032	4838.86	1	0	1	0	0	0	0.00983675
11034	4838.9	1	0	1	0	0	0	0.00986281
11036	4838.93	1	0	1	0	0	0	0.00985875
11038	4838.96	1	0	1	0	0	0	0.00981577
11040	4839	1	0	1	0	0	0	0.00986856
11042	4839.03	1	0	1	0	0	0	0.00986314
11044	4839.06	1	0	1	0	0	0	0.00987499
11046	4839.1	1	0	1	0	0	0	0.00985536
11048	4839.13	1	0	1	0	0	0	0.00984859
11050	4839.16	1	0	1	0	0	0	0.00987939
11052	4839.2	1	0	1	0	0	0	0.00986281
11054	4839.23	1	0	1	0	0	0	0.00986247
11056	4839.26	1	0	1	0	0	0	0.00983641
11058	4839.3	1	0	1	0	0	0	0.0098601
11060	4839.33	1	0	1	0	0	0	0.00984419
11062	4839.36	1	0	1	0	0	0	0.00985096
11064	4839.4	1	0	1	0	0	0	0.00981509
11066	4839.43	1	0	1	0	0	0	0.00982964
11068	4839.46	1	0	1	0	0	0	0.00979174
11070	4839.5	1	0	1	0	0	0	0.00983099
11072	4839.53	1	0	1	0	0	0	0.00979681
11074	4839.56	1	0	1	0	0	0	0.0098178
11076	4839.6	1	0	1	0	0	0	0.00977956
11078	4839.63	1	0	1	0	0	0	0.00978802
11080	4839.66	1	0	1	0	0	0	0.00978937
11082	4839.7	1	0	1	0	0	0	0.00979208
11084	4839.73	1	0	1	0	0	0	0.00981306
11086	4839.76	1	0	1	0	0	0	0.0098134
11088	4839.8	1	0	1	0	0	0	0.00978226
11090	4839.83	1	0	1	0	0	0	0.00981272
11092	4839.86	1	0	1	0	0	0	0.00975587
11094	4839.9	1	0	1	0	0	0	0.00974165
11096	4839.93	1	0	1	0	0	0	0.00981441
11098	4839.96	1	0	1	0	0	0	0.0097579
11100	4840	1	0	1	0	0	0	0.00976602
11102	4840.03	1	0	1	0	0	0	0.00974165
11104	4840.06	1	0	1	0	0	0	0.00980731
[truncated: 34,168 more rows]

## Sheet: Mouse 2_470 Signal
FrameCounter	Timestamp	LedState	Stimulation	Output0	Output1	Input0	Input1	Region0G
7107	4773.45	2	0	1	0	0	0	0.0125373
7109	4773.48	2	0	1	0	0	0	0.0125475
7111	4773.52	2	0	1	0	0	0	0.0125099
7113	4773.55	2	0	1	0	0	0	0.0125008
7115	4773.58	2	0	1	0	0	0	0.0124991
7117	4773.62	2	0	1	0	0	0	0.0125268
7119	4773.65	2	0	1	0	0	0	0.0124977
7121	4773.68	2	0	1	0	0	0	0.0124777
7123	4773.72	2	0	1	0	0	0	0.0124825
7125	4773.75	2	0	1	0	0	0	0.0125011
7127	4773.78	2	0	1	0	0	0	0.0124852
7129	4773.82	2	0	1	0	0	0	0.0125089
7131	4773.85	2	0	1	0	0	0	0.0124977
7133	4773.88	2	0	1	0	0	0	0.0124662
7135	4773.92	2	0	1	0	0	0	0.0124784
7137	4773.95	2	0	1	0	0	0	0.0125035
7139	4773.98	2	0	1	0	0	0	0.0125126
7141	4774.02	2	0	1	0	0	0	0.0124835
7143	4774.05	2	0	1	0	0	0	0.0124859
7145	4774.08	2	0	1	0	0	0	0.012449
7147	4774.12	2	0	1	0	0	0	0.0125025
7149	4774.15	2	0	1	0	0	0	0.0124974
7151	4774.18	2	0	1	0	0	0	0.0124497
7153	4774.22	2	0	1	0	0	0	0.0124527
7155	4774.25	2	0	1	0	0	0	0.0124852
7157	4774.28	2	0	1	0	0	0	0.0124612
7159	4774.32	2	0	1	0	0	0	0.0124561
7161	4774.35	2	0	1	0	0	0	0.0124121
7163	4774.38	2	0	1	0	0	0	0.0124202
7165	4774.42	2	0	1	0	0	0	0.0124131
7167	4774.45	2	0	1	0	0	0	0.0124422
7169	4774.48	2	0	1	0	0	0	0.0124246
7171	4774.52	2	0	1	0	0	0	0.0124266
7173	4774.55	2	0	1	0	0	0	0.0123969
7175	4774.58	2	0	1	0	0	0	0.0123728
7177	4774.62	2	0	1	0	0	0	0.0124036
7179	4774.65	2	0	1	0	0	0	0.0124087
7181	4774.68	2	0	1	0	0	0	0.0124155
7183	4774.72	2	0	1	0	0	0	0.0124412
7185	4774.75	2	0	1	0	0	0	0.0124371
7187	4774.78	2	0	1	0	0	0	0.0124608
7189	4774.82	2	0	1	0	0	0	0.0124652
7191	4774.85	2	0	1	0	0	0	0.0124341
7193	4774.88	2	0	1	0	0	0	0.0123925
7195	4774.92	2	0	1	0	0	0	0.0124321
7197	4774.95	2	0	1	0	0	0	0.0124568
7199	4774.98	2	0	1	0	0	0	0.0124805
7201	4775.02	2	0	1	0	0	0	0.0124358
7203	4775.05	2	0	1	0	0	0	0.0124341
7205	4775.08	2	0	1	0	0	0	0.0124585
7207	4775.12	2	0	1	0	0	0	0.0124486
7209	4775.15	2	0	1	0	0	0	0.012429
7211	4775.18	2	0	1	0	0	0	0.0124906
7213	4775.22	2	0	1	0	0	0	0.0124351
7215	4775.25	2	0	1	0	0	0	0.0124327
7217	4775.28	2	0	1	0	0	0	0.0124442
7219	4775.32	2	0	1	0	0	0	0.0124057
7221	4775.35	2	0	1	0	0	0	0.012447
7223	4775.38	2	0	1	0	0	0	0.0124321
7225	4775.42	2	0	1	0	0	0	0.0124449
7227	4775.45	2	0	1	0	0	0	0.0124371
7229	4775.48	2	0	1	0	0	0	0.0124541
7231	4775.52	2	0	1	0	0	0	0.0124598
7233	4775.55	2	0	1	0	0	0	0.0124622
7235	4775.58	2	0	1	0	0	0	0.012453
7237	4775.62	2	0	1	0	0	0	0.0124422
7239	4775.65	2	0	1	0	0	0	0.0124703
7241	4775.68	2	0	1	0	0	0	0.0124212
7243	4775.72	2	0	1	0	0	0	0.0124422
7245	4775.75	2	0	1	0	0	0	0.0124256
7247	4775.78	2	0	1	0	0	0	0.0123962
7249	4775.82	2	0	1	0	0	0	0.0124148
7251	4775.85	2	0	1	0	0	0	0.0123928
7253	4775.88	2	0	1	0	0	0	0.0123986
7255	4775.92	2	0	1	0	0	0	0.0123959
7257	4775.95	2	0	1	0	0	0	0.0123871
7259	4775.98	2	0	1	0	0	0	0.0123874
7261	4776.02	2	0	1	0	0	0	0.0124114
7263	4776.05	2	0	1	0	0	0	0.0123715
7265	4776.08	2	0	1	0	0	0	0.0124341
7267	4776.12	2	0	1	0	0	0	0.0124172
7269	4776.15	2	0	1	0	0	0	0.0124047
7271	4776.18	2	0	1	0	0	0	0.0124307
7273	4776.22	2	0	1	0	0	0	0.012385
7275	4776.25	2	0	1	0	0	0	0.0124236
7277	4776.28	2	0	1	0	0	0	0.0124537
7279	4776.32	2	0	1	0	0	0	0.0123931
7281	4776.35	2	0	1	0	0	0	0.012404
7283	4776.38	2	0	1	0	0	0	0.0124206
7285	4776.42	2	0	1	0	0	0	0.0124111
7287	4776.45	2	0	1	0	0	0	0.0124229
7289	4776.48	2	0	1	0	0	0	0.0124131
7291	4776.52	2	0	1	0	0	0	0.0124598
7293	4776.55	2	0	1	0	0	0	0.0123972
7295	4776.58	2	0	1	0	0	0	0.0124632
7297	4776.62	2	0	1	0	0	0	0.012425
7299	4776.65	2	0	1	0	0	0	0.0124212
7301	4776.68	2	0	1	0	0	0	0.0124368
7303	4776.72	2	0	1	0	0	0	0.0124361
7305	4776.75	2	0	1	0	0	0	0.0124514
7307	4776.78	2	0	1	0	0	0	0.0124324
7309	4776.82	2	0	1	0	0	0	0.0124693
7311	4776.85	2	0	1	0	0	0	0.0124591
7313	4776.88	2	0	1	0	0	0	0.0124876
7315	4776.92	2	0	1	0	0	0	0.0124618
7317	4776.95	2	0	1	0	0	0	0.0125052
7319	4776.98	2	0	1	0	0	0	0.0124527
7321	4777.02	2	0	1	0	0	0	0.0125082
7323	4777.05	2	0	1	0	0	0	0.0124673
7325	4777.08	2	0	1	0	0	0	0.0124906
7327	4777.12	2	0	1	0	0	0	0.012493
7329	4777.15	2	0	1	0	0	0	0.0124717
7331	4777.18	2	0	1	0	0	0	0.0125031
7333	4777.22	2	0	1	0	0	0	0.0124744
7335	4777.25	2	0	1	0	0	0	0.0124777
7337	4777.28	2	0	1	0	0	0	0.012429
7339	4777.32	2	0	1	0	0	0	0.0124568
7341	4777.35	2	0	1	0	0	0	0.0124358
7343	4777.38	2	0	1	0	0	0	0.0125079
7345	4777.42	2	0	1	0	0	0	0.0124981
7347	4777.45	2	0	1	0	0	0	0.0124673
7349	4777.48	2	0	1	0	0	0	0.0124991
7351	4777.52	2	0	1	0	0	0	0.0125085
7353	4777.55	2	0	1	0	0	0	0.0124913
7355	4777.58	2	0	1	0	0	0	0.0124811
7357	4777.62	2	0	1	0	0	0	0.0124757
7359	4777.65	2	0	1	0	0	0	0.0124818
7361	4777.68	2	0	1	0	0	0	0.0124879
7363	4777.72	2	0	1	0	0	0	0.0124744
7365	4777.75	2	0	1	0	0	0	0.0125356
7367	4777.78	2	0	1	0	0	0	0.0125014
7369	4777.82	2	0	1	0	0	0	0.0124994
7371	4777.85	2	0	1	0	0	0	0.0124679
7373	4777.88	2	0	1	0	0	0	0.0124832
7375	4777.92	2	0	1	0	0	0	0.0124679
7377	4777.95	2	0	1	0	0	0	0.0124659
7379	4777.98	2	0	1	0	0	0	0.0125261
7381	4778.02	2	0	1	0	0	0	0.0125048
7383	4778.05	2	0	1	0	0	0	0.0124865
7385	4778.08	2	0	1	0	0	0	0.012517
7387	4778.12	2	0	1	0	0	0	0.0125211
7389	4778.15	2	0	1	0	0	0	0.012492
7391	4778.18	2	0	1	0	0	0	0.0125353
7393	4778.22	2	0	1	0	0	0	0.0125092
7395	4778.25	2	0	1	0	0	0	0.0125123
7397	4778.28	2	0	1	0	0	0	0.0125471
7399	4778.32	2	0	1	0	0	0	0.0125157
7401	4778.35	2	0	1	0	0	0	0.0125627
7403	4778.38	2	0	1	0	0	0	0.0125441
7405	4778.42	2	0	1	0	0	0	0.012517
7407	4778.45	2	0	1	0	0	0	0.0125471
7409	4778.48	2	0	1	0	0	0	0.0125001
7411	4778.52	2	0	1	0	0	0	0.0125089
7413	4778.55	2	0	1	0	0	0	0.0125217
7415	4778.58	2	0	1	0	0	0	0.0125035
7417	4778.62	2	0	1	0	0	0	0.0124865
7419	4778.65	2	0	1	0	0	0	0.0125058
7421	4778.68	2	0	1	0	0	0	0.0124987
7423	4778.72	2	0	1	0	0	0	0.0124392
7425	4778.75	2	0	1	0	0	0	0.0124463
7427	4778.78	2	0	1	0	0	0	0.0124622
7429	4778.82	2	0	1	0	0	0	0.0124615
7431	4778.85	2	0	1	0	0	0	0.0124449
7433	4778.88	2	0	1	0	0	0	0.0124828
7435	4778.92	2	0	1	0	0	0	0.0124737
7437	4778.95	2	0	1	0	0	0	0.01247
7439	4778.98	2	0	1	0	0	0	0.0124767
7441	4779.02	2	0	1	0	0	0	0.012474
7443	4779.05	2	0	1	0	0	0	0.012452
7445	4779.08	2	0	1	0	0	0	0.0124706
7447	4779.12	2	0	1	0	0	0	0.0124486
7449	4779.15	2	0	1	0	0	0	0.0124629
7451	4779.18	2	0	1	0	0	0	0.0124111
7453	4779.22	2	0	1	0	0	0	0.0124148
7455	4779.25	2	0	1	0	0	0	0.0124598
7457	4779.28	2	0	1	0	0	0	0.0124199
7459	4779.32	2	0	1	0	0	0	0.0124564
7461	4779.35	2	0	1	0	0	0	0.0124185
7463	4779.38	2	0	1	0	0	0	0.0124151
7465	4779.42	2	0	1	0	0	0	0.0124537
7467	4779.45	2	0	1	0	0	0	0.0124449
7469	4779.48	2	0	1	0	0	0	0.0124341
7471	4779.52	2	0	1	0	0	0	0.0124229
7473	4779.55	2	0	1	0	0	0	0.0124744
7475	4779.58	2	0	1	0	0	0	0.0124321
7477	4779.62	2	0	1	0	0	0	0.0123891
7479	4779.65	2	0	1	0	0	0	0.0124067
7481	4779.68	2	0	1	0	0	0	0.0124449
7483	4779.72	2	0	1	0	0	0	0.012403
7485	4779.75	2	0	1	0	0	0	0.0124605
7487	4779.78	2	0	1	0	0	0	0.0124395
7489	4779.82	2	0	1	0	0	0	0.01243
7491	4779.85	2	0	1	0	0	0	0.0124733
7493	4779.88	2	0	1	0	0	0	0.0124798
7495	4779.92	2	0	1	0	0	0	0.0124297
7497	4779.95	2	0	1	0	0	0	0.0124811
7499	4779.98	2	0	1	0	0	0	0.012431
7501	4780.02	2	0	1	0	0	0	0.0124571
7503	4780.05	2	0	1	0	0	0	0.0124801
7505	4780.08	2	0	1	0	0	0	0.0124558
7507	4780.12	2	0	1	0	0	0	0.0124805
7509	4780.15	2	0	1	0	0	0	0.0125089
7511	4780.18	2	0	1	0	0	0	0.0124158
7513	4780.22	2	0	1	0	0	0	0.0124777
7515	4780.25	2	0	1	0	0	0	0.012471
7517	4780.28	2	0	1	0	0	0	0.0124808
7519	4780.32	2	0	1	0	0	0	0.0124547
7521	4780.35	2	0	1	0	0	0	0.0124825
7523	4780.38	2	0	1	0	0	0	0.012427
7525	4780.42	2	0	1	0	0	0	0.0124426
7527	4780.45	2	0	1	0	0	0	0.0124916
7529	4780.48	2	0	1	0	0	0	0.0125079
7531	4780.52	2	0	1	0	0	0	0.0125224
7533	4780.55	2	0	1	0	0	0	0.0125363
7535	4780.58	2	0	1	0	0	0	0.0125339
7537	4780.62	2	0	1	0	0	0	0.0125637
7539	4780.65	2	0	1	0	0	0	0.012518
7541	4780.68	2	0	1	0	0	0	0.0124825
7543	4780.72	2	0	1	0	0	0	0.0124964
7545	4780.75	2	0	1	0	0	0	0.0124784
7547	4780.78	2	0	1	0	0	0	0.0124916
7549	4780.82	2	0	1	0	0	0	0.0124845
7551	4780.85	2	0	1	0	0	0	0.0124659
7553	4780.88	2	0	1	0	0	0	0.0125062
7555	4780.92	2	0	1	0	0	0	0.0125052
7557	4780.95	2	0	1	0	0	0	0.0125082
7559	4780.98	2	0	1	0	0	0	0.0125414
7561	4781.02	2	0	1	0	0	0	0.0125519
7563	4781.05	2	0	1	0	0	0	0.0125326
7565	4781.08	2	0	1	0	0	0	0.0124886
7567	4781.12	2	0	1	0	0	0	0.0125085
7569	4781.15	2	0	1	0	0	0	0.0124964
7571	4781.18	2	0	1	0	0	0	0.0125329
7573	4781.22	2	0	1	0	0	0	0.0125079
7575	4781.25	2	0	1	0	0	0	0.0125211
7577	4781.28	2	0	1	0	0	0	0.0125092
7579	4781.32	2	0	1	0	0	0	0.0125082
7581	4781.35	2	0	1	0	0	0	0.0124622
7583	4781.38	2	0	1	0	0	0	0.0124967
7585	4781.42	2	0	1	0	0	0	0.0125008
7587	4781.45	2	0	1	0	0	0	0.0125217
7589	4781.48	2	0	1	0	0	0	0.0124984
7591	4781.52	2	0	1	0	0	0	0.0125343
7593	4781.55	2	0	1	0	0	0	0.0124669
7595	4781.58	2	0	1	0	0	0	0.0124893
7597	4781.62	2	0	1	0	0	0	0.0125106
7599	4781.65	2	0	1	0	0	0	0.0124913
7601	4781.68	2	0	1	0	0	0	0.0124625
7603	4781.72	2	0	1	0	0	0	0.0124652
7605	4781.75	2	0	1	0	0	0	0.0124662
7607	4781.78	2	0	1	0	0	0	0.012428
7609	4781.82	2	0	1	0	0	0	0.0124808
7611	4781.85	2	0	1	0	0	0	0.0124598
7613	4781.88	2	0	1	0	0	0	0.0124673
7615	4781.92	2	0	1	0	0	0	0.0124615
7617	4781.95	2	0	1	0	0	0	0.0124662
7619	4781.98	2	0	1	0	0	0	0.0124371
7621	4782.02	2	0	1	0	0	0	0.0124676
7623	4782.05	2	0	1	0	0	0	0.0124541
7625	4782.08	2	0	1	0	0	0	0.0124754
7627	4782.12	2	0	1	0	0	0	0.012497
7629	4782.15	2	0	1	0	0	0	0.0124585
7631	4782.18	2	0	1	0	0	0	0.012452
7633	4782.22	2	0	1	0	0	0	0.0124544
7635	4782.25	2	0	1	0	0	0	0.0124754
7637	4782.28	2	0	1	0	0	0	0.0124676
7639	4782.32	2	0	1	0	0	0	0.0124463
7641	4782.35	2	0	1	0	0	0	0.0124832
7643	4782.38	2	0	1	0	0	0	0.0124639
7645	4782.42	2	0	1	0	0	0	0.0124409
7647	4782.45	2	0	1	0	0	0	0.0124317
7649	4782.48	2	0	1	0	0	0	0.0124615
7651	4782.52	2	0	1	0	0	0	0.0124757
7653	4782.55	2	0	1	0	0	0	0.0124514
7655	4782.58	2	0	1	0	0	0	0.0124622
7657	4782.62	2	0	1	0	0	0	0.0124524
7659	4782.65	2	0	1	0	0	0	0.0124943
7661	4782.68	2	0	1	0	0	0	0.012453
7663	4782.72	2	0	1	0	0	0	0.0124967
7665	4782.75	2	0	1	0	0	0	0.0124845
7667	4782.78	2	0	1	0	0	0	0.0124375
7669	4782.82	2	0	1	0	0	0	0.0124612
7671	4782.85	2	0	1	0	0	0	0.0125001
7673	4782.88	2	0	1	0	0	0	0.0125048
7675	4782.92	2	0	1	0	0	0	0.0125018
7677	4782.95	2	0	1	0	0	0	0.0124964
7679	4782.98	2	0	1	0	0	0	0.0125035
7681	4783.02	2	0	1	0	0	0	0.0125366
7683	4783.05	2	0	1	0	0	0	0.0125282
7685	4783.08	2	0	1	0	0	0	0.012515
7687	4783.12	2	0	1	0	0	0	0.0125678
7689	4783.15	2	0	1	0	0	0	0.0125248
7691	4783.18	2	0	1	0	0	0	0.0125637
7693	4783.22	2	0	1	0	0	0	0.0125691
7695	4783.25	2	0	1	0	0	0	0.0125955
7697	4783.28	2	0	1	0	0	0	0.0125634
7699	4783.32	2	0	1	0	0	0	0.0125806
7701	4783.35	2	0	1	0	0	0	0.0125468
7703	4783.38	2	0	1	0	0	0	0.0125634
7705	4783.42	2	0	1	0	0	0	0.0125255
7707	4783.45	2	0	1	0	0	0	0.0125522
7709	4783.48	2	0	1	0	0	0	0.0126016
7711	4783.52	2	0	1	0	0	0	0.0125613
7713	4783.55	2	0	1	0	0	0	0.0125136
7715	4783.58	2	0	1	0	0	0	0.0125458
7717	4783.62	2	0	1	0	0	0	0.012558
7719	4783.65	2	0	1	0	0	0	0.0125566
7721	4783.68	2	0	1	0	0	0	0.0125762
7723	4783.72	2	0	1	0	0	0	0.0125522
7725	4783.75	2	0	1	0	0	0	0.0125089
7727	4783.78	2	0	1	0	0	0	0.0125214
7729	4783.82	2	0	1	0	0	0	0.0124832
7731	4783.85	2	0	1	0	0	0	0.0124757
7733	4783.88	2	0	1	0	0	0	0.012473
7735	4783.92	2	0	1	0	0	0	0.0125085
7737	4783.95	2	0	1	0	0	0	0.012518
7739	4783.98	2	0	1	0	0	0	0.0125187
7741	4784.02	2	0	1	0	0	0	0.0125228
7743	4784.05	2	0	1	0	0	0	0.0125123
7745	4784.08	2	0	1	0	0	0	0.0125126
7747	4784.12	2	0	1	0	0	0	0.0125451
7749	4784.15	2	0	1	0	0	0	0.0125245
7751	4784.18	2	0	1	0	0	0	0.0125096
7753	4784.22	2	0	1	0	0	0	0.0125603
7755	4784.25	2	0	1	0	0	0	0.0125512
7757	4784.28	2	0	1	0	0	0	0.0125624
7759	4784.32	2	0	1	0	0	0	0.0125454
7761	4784.35	2	0	1	0	0	0	0.0125356
7763	4784.38	2	0	1	0	0	0	0.0125014
7765	4784.42	2	0	1	0	0	0	0.0125437
7767	4784.45	2	0	1	0	0	0	0.0125123
7769	4784.48	2	0	1	0	0	0	0.0125224
7771	4784.52	2	0	1	0	0	0	0.012453
7773	4784.55	2	0	1	0	0	0	0.0124808
7775	4784.58	2	0	1	0	0	0	0.0125062
7777	4784.62	2	0	1	0	0	0	0.0125045
7779	4784.65	2	0	1	0	0	0	0.0124683
7781	4784.68	2	0	1	0	0	0	0.0125008
7783	4784.72	2	0	1	0	0	0	0.0125079
7785	4784.75	2	0	1	0	0	0	0.0125153
7787	4784.78	2	0	1	0	0	0	0.0124534
7789	4784.82	2	0	1	0	0	0	0.012496
7791	4784.85	2	0	1	0	0	0	0.0124991
7793	4784.88	2	0	1	0	0	0	0.012475
7795	4784.92	2	0	1	0	0	0	0.0124838
7797	4784.95	2	0	1	0	0	0	0.0125085
7799	4784.98	2	0	1	0	0	0	0.0124835
7801	4785.02	2	0	1	0	0	0	0.012496
7803	4785.05	2	0	1	0	0	0	0.0124933
7805	4785.08	2	0	1	0	0	0	0.0124541
7807	4785.12	2	0	1	0	0	0	0.0124838
7809	4785.15	2	0	1	0	0	0	0.012493
7811	4785.18	2	0	1	0	0	0	0.0124849
7813	4785.22	2	0	1	0	0	0	0.0125596
7815	4785.25	2	0	1	0	0	0	0.0125505
7817	4785.28	2	0	1	0	0	0	0.0125201
7819	4785.32	2	0	1	0	0	0	0.0125332
7821	4785.35	2	0	1	0	0	0	0.0125586
7823	4785.38	2	0	1	0	0	0	0.0125424
7825	4785.42	2	0	1	0	0	0	0.0125668
7827	4785.45	2	0	1	0	0	0	0.0125563
7829	4785.48	2	0	1	0	0	0	0.0125617
7831	4785.52	2	0	1	0	0	0	0.0125522
7833	4785.55	2	0	1	0	0	0	0.0125573
7835	4785.58	2	0	1	0	0	0	0.0125109
7837	4785.62	2	0	1	0	0	0	0.0124926
7839	4785.65	2	0	1	0	0	0	0.0125251
7841	4785.68	2	0	1	0	0	0	0.0125573
7843	4785.72	2	0	1	0	0	0	0.0125065
7845	4785.75	2	0	1	0	0	0	0.0125431
7847	4785.78	2	0	1	0	0	0	0.0125373
7849	4785.82	2	0	1	0	0	0	0.0125339
7851	4785.85	2	0	1	0	0	0	0.0125678
7853	4785.88	2	0	1	0	0	0	0.0125058
7855	4785.92	2	0	1	0	0	0	0.012562
7857	4785.95	2	0	1	0	0	0	0.0125508
7859	4785.98	2	0	1	0	0	0	0.012541
7861	4786.02	2	0	1	0	0	0	0.012562
7863	4786.05	2	0	1	0	0	0	0.0125508
7865	4786.08	2	0	1	0	0	0	0.0125607
7867	4786.12	2	0	1	0	0	0	0.0125573
7869	4786.15	2	0	1	0	0	0	0.0125607
7871	4786.18	2	0	1	0	0	0	0.0125573
7873	4786.22	2	0	1	0	0	0	0.0125796
7875	4786.25	2	0	1	0	0	0	0.0125295
7877	4786.28	2	0	1	0	0	0	0.0125349
7879	4786.32	2	0	1	0	0	0	0.0125735
7881	4786.35	2	0	1	0	0	0	0.01256
7883	4786.38	2	0	1	0	0	0	0.0125187
7885	4786.42	2	0	1	0	0	0	0.0124896
7887	4786.45	2	0	1	0	0	0	0.0125129
7889	4786.48	2	0	1	0	0	0	0.0125129
7891	4786.52	2	0	1	0	0	0	0.0124977
7893	4786.55	2	0	1	0	0	0	0.0124899
7895	4786.58	2	0	1	0	0	0	0.012517
7897	4786.62	2	0	1	0	0	0	0.0125136
7899	4786.65	2	0	1	0	0	0	0.0124916
7901	4786.68	2	0	1	0	0	0	0.0124832
7903	4786.72	2	0	1	0	0	0	0.0124838
7905	4786.75	2	0	1	0	0	0	0.0124828
7907	4786.78	2	0	1	0	0	0	0.0124706
7909	4786.82	2	0	1	0	0	0	0.0124666
7911	4786.85	2	0	1	0	0	0	0.0124916
7913	4786.88	2	0	1	0	0	0	0.0124845
7915	4786.92	2	0	1	0	0	0	0.0124981
7917	4786.95	2	0	1	0	0	0	0.0124913
7919	4786.98	2	0	1	0	0	0	0.0125018
7921	4787.02	2	0	1	0	0	0	0.0125295
7923	4787.05	2	0	1	0	0	0	0.0125092
7925	4787.08	2	0	1	0	0	0	0.0124842
7927	4787.12	2	0	1	0	0	0	0.0124967
7929	4787.15	2	0	1	0	0	0	0.0125102
7931	4787.18	2	0	1	0	0	0	0.0125194
7933	4787.22	2	0	1	0	0	0	0.012515
7935	4787.25	2	0	1	0	0	0	0.0125106
7937	4787.28	2	0	1	0	0	0	0.0125079
7939	4787.32	2	0	1	0	0	0	0.0125397
7941	4787.35	2	0	1	0	0	0	0.0125376
7943	4787.38	2	0	1	0	0	0	0.0125167
7945	4787.42	2	0	1	0	0	0	0.0125038
7947	4787.45	2	0	1	0	0	0	0.0124794
7949	4787.48	2	0	1	0	0	0	0.0125069
7951	4787.52	2	0	1	0	0	0	0.0124622
7953	4787.55	2	0	1	0	0	0	0.0125075
7955	4787.58	2	0	1	0	0	0	0.0124544
7957	4787.62	2	0	1	0	0	0	0.0125136
7959	4787.65	2	0	1	0	0	0	0.0124622
7961	4787.68	2	0	1	0	0	0	0.0125038
7963	4787.72	2	0	1	0	0	0	0.0124882
7965	4787.75	2	0	1	0	0	0	0.0124713
7967	4787.78	2	0	1	0	0	0	0.0124832
7969	4787.82	2	0	1	0	0	0	0.0124449
7971	4787.85	2	0	1	0	0	0	0.0124859
7973	4787.88	2	0	1	0	0	0	0.0124933
7975	4787.92	2	0	1	0	0	0	0.0124872
7977	4787.95	2	0	1	0	0	0	0.0124696
7979	4787.98	2	0	1	0	0	0	0.0124317
7981	4788.02	2	0	1	0	0	0	0.0124456
7983	4788.05	2	0	1	0	0	0	0.0124402
7985	4788.08	2	0	1	0	0	0	0.0124679
7987	4788.12	2	0	1	0	0	0	0.0124574
7989	4788.15	2	0	1	0	0	0	0.0124886
7991	4788.18	2	0	1	0	0	0	0.0124947
7993	4788.22	2	0	1	0	0	0	0.0125184
7995	4788.25	2	0	1	0	0	0	0.0124997
7997	4788.28	2	0	1	0	0	0	0.0124994
7999	4788.32	2	0	1	0	0	0	0.0125177
8001	4788.35	2	0	1	0	0	0	0.0125241
8003	4788.38	2	0	1	0	0	0	0.012541
8005	4788.42	2	0	1	0	0	0	0.0125607
8007	4788.45	2	0	1	0	0	0	0.0125546
8009	4788.48	2	0	1	0	0	0	0.0125431
8011	4788.52	2	0	1	0	0	0	0.0125305
8013	4788.55	2	0	1	0	0	0	0.012541
8015	4788.58	2	0	1	0	0	0	0.012514
8017	4788.62	2	0	1	0	0	0	0.0125353
8019	4788.65	2	0	1	0	0	0	0.0125363
8021	4788.68	2	0	1	0	0	0	0.0125393
8023	4788.72	2	0	1	0	0	0	0.0125238
8025	4788.75	2	0	1	0	0	0	0.0125373
8027	4788.78	2	0	1	0	0	0	0.0124997
8029	4788.82	2	0	1	0	0	0	0.0125498
8031	4788.85	2	0	1	0	0	0	0.0125749
8033	4788.88	2	0	1	0	0	0	0.0125671
8035	4788.92	2	0	1	0	0	0	0.0125393
8037	4788.95	2	0	1	0	0	0	0.0125245
8039	4788.98	2	0	1	0	0	0	0.0125793
8041	4789.02	2	0	1	0	0	0	0.0125461
8043	4789.05	2	0	1	0	0	0	0.0125607
8045	4789.08	2	0	1	0	0	0	0.0125387
8047	4789.12	2	0	1	0	0	0	0.0126388
8049	4789.15	2	0	1	0	0	0	0.0125468
8051	4789.18	2	0	1	0	0	0	0.0126013
8053	4789.22	2	0	1	0	0	0	0.012537
8055	4789.25	2	0	1	0	0	0	0.0125613
8057	4789.28	2	0	1	0	0	0	0.0125498
8059	4789.32	2	0	1	0	0	0	0.0125525
8061	4789.35	2	0	1	0	0	0	0.0125444
8063	4789.38	2	0	1	0	0	0	0.0125387
8065	4789.42	2	0	1	0	0	0	0.0125864
8067	4789.45	2	0	1	0	0	0	0.0125431
8069	4789.48	2	0	1	0	0	0	0.0125275
8071	4789.52	2	0	1	0	0	0	0.0125674
8073	4789.55	2	0	1	0	0	0	0.0126026
8075	4789.58	2	0	1	0	0	0	0.0125965
8077	4789.62	2	0	1	0	0	0	0.0125992
8079	4789.65	2	0	1	0	0	0	0.012653
8081	4789.68	2	0	1	0	0	0	0.0126209
8083	4789.72	2	0	1	0	0	0	0.0125857
8085	4789.75	2	0	1	0	0	0	0.0125881
8087	4789.78	2	0	1	0	0	0	0.0125948
8089	4789.82	2	0	1	0	0	0	0.0125664
8091	4789.85	2	0	1	0	0	0	0.0125766
8093	4789.88	2	0	1	0	0	0	0.012541
8095	4789.92	2	0	1	0	0	0	0.0125884
8097	4789.95	2	0	1	0	0	0	0.0125525
8099	4789.98	2	0	1	0	0	0	0.0126016
8101	4790.02	2	0	1	0	0	0	0.0125508
8103	4790.05	2	0	1	0	0	0	0.0125508
8105	4790.08	2	0	1	0	0	0	0.0125789
8107	4790.12	2	0	1	0	0	0	0.0125857
8109	4790.15	2	0	1	0	0	0	0.0125823
8111	4790.18	2	0	1	0	0	0	0.012538
8113	4790.22	2	0	1	0	0	0	0.0125373
8115	4790.25	2	0	1	0	0	0	0.0125102
8117	4790.28	2	0	1	0	0	0	0.0124909
8119	4790.32	2	0	1	0	0	0	0.0125238
8121	4790.35	2	0	1	0	0	0	0.0125085
8123	4790.38	2	0	1	0	0	0	0.0125245
8125	4790.42	2	0	1	0	0	0	0.0125157
8127	4790.45	2	0	1	0	0	0	0.0125349
8129	4790.48	2	0	1	0	0	0	0.0125901
8131	4790.52	2	0	1	0	0	0	0.0125123
8133	4790.55	2	0	1	0	0	0	0.0124981
8135	4790.58	2	0	1	0	0	0	0.0125607
8137	4790.62	2	0	1	0	0	0	0.0125238
8139	4790.65	2	0	1	0	0	0	0.0125167
8141	4790.68	2	0	1	0	0	0	0.012471
8143	4790.72	2	0	1	0	0	0	0.0124937
8145	4790.75	2	0	1	0	0	0	0.0124811
8147	4790.78	2	0	1	0	0	0	0.0124987
8149	4790.82	2	0	1	0	0	0	0.0125052
8151	4790.85	2	0	1	0	0	0	0.0125217
8153	4790.88	2	0	1	0	0	0	0.0124821
8155	4790.92	2	0	1	0	0	0	0.0125102
8157	4790.95	2	0	1	0	0	0	0.0125282
8159	4790.98	2	0	1	0	0	0	0.0125268
8161	4791.02	2	0	1	0	0	0	0.0125126
8163	4791.05	2	0	1	0	0	0	0.012493
8165	4791.08	2	0	1	0	0	0	0.0125041
8167	4791.12	2	0	1	0	0	0	0.0125234
8169	4791.15	2	0	1	0	0	0	0.0124926
8171	4791.18	2	0	1	0	0	0	0.012453
8173	4791.22	2	0	1	0	0	0	0.0124432
8175	4791.25	2	0	1	0	0	0	0.0124855
8177	4791.28	2	0	1	0	0	0	0.0125319
8179	4791.32	2	0	1	0	0	0	0.0124967
8181	4791.35	2	0	1	0	0	0	0.0125427
8183	4791.38	2	0	1	0	0	0	0.0125522
8185	4791.42	2	0	1	0	0	0	0.0125569
8187	4791.45	2	0	1	0	0	0	0.0125695
8189	4791.48	2	0	1	0	0	0	0.0126016
8191	4791.52	2	0	1	0	0	0	0.0125519
8193	4791.55	2	0	1	0	0	0	0.0125349
8195	4791.58	2	0	1	0	0	0	0.0125505
8197	4791.62	2	0	1	0	0	0	0.0124997
8199	4791.65	2	0	1	0	0	0	0.0124446
8201	4791.68	2	0	1	0	0	0	0.0124486
8203	4791.72	2	0	1	0	0	0	0.0124784
8205	4791.75	2	0	1	0	0	0	0.0124849
8207	4791.78	2	0	1	0	0	0	0.0124879
8209	4791.82	2	0	1	0	0	0	0.0124767
8211	4791.85	2	0	1	0	0	0	0.0125021
8213	4791.88	2	0	1	0	0	0	0.0125184
8215	4791.92	2	0	1	0	0	0	0.0124903
8217	4791.95	2	0	1	0	0	0	0.0125058
8219	4791.98	2	0	1	0	0	0	0.012469
8221	4792.02	2	0	1	0	0	0	0.0124405
8223	4792.05	2	0	1	0	0	0	0.0125211
8225	4792.08	2	0	1	0	0	0	0.0125234
8227	4792.12	2	0	1	0	0	0	0.0124679
8229	4792.15	2	0	1	0	0	0	0.0125214
8231	4792.18	2	0	1	0	0	0	0.0124615
8233	4792.22	2	0	1	0	0	0	0.012473
8235	4792.25	2	0	1	0	0	0	0.0125214
8237	4792.28	2	0	1	0	0	0	0.0124937
8239	4792.32	2	0	1	0	0	0	0.0125248
8241	4792.35	2	0	1	0	0	0	0.0124602
8243	4792.38	2	0	1	0	0	0	0.01245
8245	4792.42	2	0	1	0	0	0	0.0124453
8247	4792.45	2	0	1	0	0	0	0.0124781
8249	4792.48	2	0	1	0	0	0	0.0124486
8251	4792.52	2	0	1	0	0	0	0.0124727
8253	4792.55	2	0	1	0	0	0	0.0124588
8255	4792.58	2	0	1	0	0	0	0.0124253
8257	4792.62	2	0	1	0	0	0	0.012471
8259	4792.65	2	0	1	0	0	0	0.0124862
8261	4792.68	2	0	1	0	0	0	0.0124602
8263	4792.72	2	0	1	0	0	0	0.0124669
8265	4792.75	2	0	1	0	0	0	0.012431
8267	4792.78	2	0	1	0	0	0	0.0124165
8269	4792.82	2	0	1	0	0	0	0.0124466
8271	4792.85	2	0	1	0	0	0	0.0124283
8273	4792.88	2	0	1	0	0	0	0.0124649
8275	4792.92	2	0	1	0	0	0	0.0124483
8277	4792.95	2	0	1	0	0	0	0.0124432
8279	4792.98	2	0	1	0	0	0	0.0124294
8281	4793.02	2	0	1	0	0	0	0.0124703
8283	4793.05	2	0	1	0	0	0	0.0124693
8285	4793.08	2	0	1	0	0	0	0.0124006
8287	4793.12	2	0	1	0	0	0	0.012448
8289	4793.15	2	0	1	0	0	0	0.0124013
8291	4793.18	2	0	1	0	0	0	0.0124145
8293	4793.22	2	0	1	0	0	0	0.0124121
8295	4793.25	2	0	1	0	0	0	0.012364
8297	4793.28	2	0	1	0	0	0	0.0123959
8299	4793.32	2	0	1	0	0	0	0.0124206
8301	4793.35	2	0	1	0	0	0	0.012471
8303	4793.38	2	0	1	0	0	0	0.012426
8305	4793.42	2	0	1	0	0	0	0.0124185
8307	4793.45	2	0	1	0	0	0	0.012496
8309	4793.48	2	0	1	0	0	0	0.0124266
8311	4793.52	2	0	1	0	0	0	0.012431
8313	4793.55	2	0	1	0	0	0	0.0124334
8315	4793.58	2	0	1	0	0	0	0.0123969
8317	4793.62	2	0	1	0	0	0	0.0124236
8319	4793.65	2	0	1	0	0	0	0.0123837
8321	4793.68	2	0	1	0	0	0	0.0124053
8323	4793.72	2	0	1	0	0	0	0.0123955
8325	4793.75	2	0	1	0	0	0	0.0123938
8327	4793.78	2	0	1	0	0	0	0.0124178
8329	4793.82	2	0	1	0	0	0	0.0124493
8331	4793.85	2	0	1	0	0	0	0.0124266
8333	4793.88	2	0	1	0	0	0	0.0124327
8335	4793.92	2	0	1	0	0	0	0.012363
8337	4793.95	2	0	1	0	0	0	0.0124378
8339	4793.98	2	0	1	0	0	0	0.0124371
8341	4794.02	2	0	1	0	0	0	0.0123644
8343	4794.05	2	0	1	0	0	0	0.0124175
8345	4794.08	2	0	1	0	0	0	0.0124091
8347	4794.12	2	0	1	0	0	0	0.0124273
8349	4794.15	2	0	1	0	0	0	0.0123492
8351	4794.18	2	0	1	0	0	0	0.0123898
8353	4794.22	2	0	1	0	0	0	0.0124266
8355	4794.25	2	0	1	0	0	0	0.0123965
8357	4794.28	2	0	1	0	0	0	0.0124053
8359	4794.32	2	0	1	0	0	0	0.0124466
8361	4794.35	2	0	1	0	0	0	0.0123945
8363	4794.38	2	0	1	0	0	0	0.0124256
8365	4794.42	2	0	1	0	0	0	0.0123881
8367	4794.45	2	0	1	0	0	0	0.0123989
8369	4794.48	2	0	1	0	0	0	0.0124151
8371	4794.52	2	0	1	0	0	0	0.012431
8373	4794.55	2	0	1	0	0	0	0.0124476
8375	4794.58	2	0	1	0	0	0	0.012431
8377	4794.62	2	0	1	0	0	0	0.0124239
8379	4794.65	2	0	1	0	0	0	0.0124398
8381	4794.68	2	0	1	0	0	0	0.0124486
8383	4794.72	2	0	1	0	0	0	0.0123877
8385	4794.75	2	0	1	0	0	0	0.0123887
8387	4794.78	2	0	1	0	0	0	0.0123952
8389	4794.82	2	0	1	0	0	0	0.0123918
8391	4794.85	2	0	1	0	0	0	0.0123728
8393	4794.88	2	0	1	0	0	0	0.0123972
8395	4794.92	2	0	1	0	0	0	0.0123996
8397	4794.95	2	0	1	0	0	0	0.0123864
8399	4794.98	2	0	1	0	0	0	0.0123921
8401	4795.02	2	0	1	0	0	0	0.0123975
8403	4795.05	2	0	1	0	0	0	0.01236
8405	4795.08	2	0	1	0	0	0	0.0124192
8407	4795.12	2	0	1	0	0	0	0.0124165
8409	4795.15	2	0	1	0	0	0	0.0124422
8411	4795.18	2	0	1	0	0	0	0.0124314
8413	4795.22	2	0	1	0	0	0	0.0124398
8415	4795.25	2	0	1	0	0	0	0.0124507
8417	4795.28	2	0	1	0	0	0	0.0124561
8419	4795.32	2	0	1	0	0	0	0.0124537
8421	4795.35	2	0	1	0	0	0	0.0124838
8423	4795.38	2	0	1	0	0	0	0.0124463
8425	4795.42	2	0	1	0	0	0	0.0124625
8427	4795.45	2	0	1	0	0	0	0.0124845
8429	4795.48	2	0	1	0	0	0	0.0124632
8431	4795.52	2	0	1	0	0	0	0.0124761
8433	4795.55	2	0	1	0	0	0	0.0125089
8435	4795.58	2	0	1	0	0	0	0.0124947
8437	4795.62	2	0	1	0	0	0	0.0124602
8439	4795.65	2	0	1	0	0	0	0.0124889
8441	4795.68	2	0	1	0	0	0	0.0124957
8443	4795.72	2	0	1	0	0	0	0.0124865
8445	4795.75	2	0	1	0	0	0	0.0125001
8447	4795.78	2	0	1	0	0	0	0.0125133
8449	4795.82	2	0	1	0	0	0	0.0124476
8451	4795.85	2	0	1	0	0	0	0.0124791
8453	4795.88	2	0	1	0	0	0	0.0124781
8455	4795.92	2	0	1	0	0	0	0.0124838
8457	4795.95	2	0	1	0	0	0	0.0124229
8459	4795.98	2	0	1	0	0	0	0.0124659
8461	4796.02	2	0	1	0	0	0	0.0124757
8463	4796.05	2	0	1	0	0	0	0.0125143
8465	4796.08	2	0	1	0	0	0	0.0124855
8467	4796.12	2	0	1	0	0	0	0.0125177
8469	4796.15	2	0	1	0	0	0	0.0125275
8471	4796.18	2	0	1	0	0	0	0.0125187
8473	4796.22	2	0	1	0	0	0	0.0124947
8475	4796.25	2	0	1	0	0	0	0.0124805
8477	4796.28	2	0	1	0	0	0	0.0124997
8479	4796.32	2	0	1	0	0	0	0.0124497
8481	4796.35	2	0	1	0	0	0	0.0124852
8483	4796.38	2	0	1	0	0	0	0.0124632
8485	4796.42	2	0	1	0	0	0	0.0125092
8487	4796.45	2	0	1	0	0	0	0.0124811
8489	4796.48	2	0	1	0	0	0	0.0124595
8491	4796.52	2	0	1	0	0	0	0.0124855
8493	4796.55	2	0	1	0	0	0	0.0125329
8495	4796.58	2	0	1	0	0	0	0.0125065
8497	4796.62	2	0	1	0	0	0	0.0124544
8499	4796.65	2	0	1	0	0	0	0.0125224
8501	4796.68	2	0	1	0	0	0	0.0124832
8503	4796.72	2	0	1	0	0	0	0.0124754
8505	4796.75	2	0	1	0	0	0	0.0124771
8507	4796.78	2	0	1	0	0	0	0.0124943
8509	4796.82	2	0	1	0	0	0	0.0124818
8511	4796.85	2	0	1	0	0	0	0.0124811
8513	4796.88	2	0	1	0	0	0	0.0124835
8515	4796.92	2	0	1	0	0	0	0.0125143
8517	4796.95	2	0	1	0	0	0	0.0125644
8519	4796.98	2	0	1	0	0	0	0.0124967
8521	4797.02	2	0	1	0	0	0	0.0125028
8523	4797.05	2	0	1	0	0	0	0.0124395
8525	4797.08	2	0	1	0	0	0	0.0124811
8527	4797.12	2	0	1	0	0	0	0.0124913
8529	4797.15	2	0	1	0	0	0	0.0125207
8531	4797.18	2	0	1	0	0	0	0.0124629
8533	4797.22	2	0	1	0	0	0	0.0124574
8535	4797.25	2	0	1	0	0	0	0.0124686
8537	4797.28	2	0	1	0	0	0	0.0125136
8539	4797.32	2	0	1	0	0	0	0.0124676
8541	4797.35	2	0	1	0	0	0	0.0124737
8543	4797.38	2	0	1	0	0	0	0.0125082
8545	4797.42	2	0	1	0	0	0	0.0125123
8547	4797.45	2	0	1	0	0	0	0.0124909
8549	4797.48	2	0	1	0	0	0	0.0125353
8551	4797.52	2	0	1	0	0	0	0.0125184
8553	4797.55	2	0	1	0	0	0	0.0125099
8555	4797.58	2	0	1	0	0	0	0.0125261
8557	4797.62	2	0	1	0	0	0	0.0125404
8559	4797.65	2	0	1	0	0	0	0.012496
8561	4797.68	2	0	1	0	0	0	0.0125045
8563	4797.72	2	0	1	0	0	0	0.0125014
8565	4797.75	2	0	1	0	0	0	0.0125234
8567	4797.78	2	0	1	0	0	0	0.0125668
8569	4797.82	2	0	1	0	0	0	0.0125184
8571	4797.85	2	0	1	0	0	0	0.0125339
8573	4797.88	2	0	1	0	0	0	0.0125245
8575	4797.92	2	0	1	0	0	0	0.012542
8577	4797.95	2	0	1	0	0	0	0.0125448
8579	4797.98	2	0	1	0	0	0	0.0124882
8581	4798.02	2	0	1	0	0	0	0.0125295
8583	4798.05	2	0	1	0	0	0	0.0124953
8585	4798.08	2	0	1	0	0	0	0.0124832
8587	4798.12	2	0	1	0	0	0	0.0124926
8589	4798.15	2	0	1	0	0	0	0.0125025
8591	4798.18	2	0	1	0	0	0	0.0125099
8593	4798.22	2	0	1	0	0	0	0.0124676
8595	4798.25	2	0	1	0	0	0	0.0124693
8597	4798.28	2	0	1	0	0	0	0.0124865
8599	4798.32	2	0	1	0	0	0	0.0124737
8601	4798.35	2	0	1	0	0	0	0.0125082
8603	4798.38	2	0	1	0	0	0	0.0124588
8605	4798.42	2	0	1	0	0	0	0.0124568
8607	4798.45	2	0	1	0	0	0	0.0124622
8609	4798.48	2	0	1	0	0	0	0.0124781
8611	4798.52	2	0	1	0	0	0	0.0124415
8613	4798.55	2	0	1	0	0	0	0.0124409
8615	4798.58	2	0	1	0	0	0	0.0124507
8617	4798.62	2	0	1	0	0	0	0.0124713
8619	4798.65	2	0	1	0	0	0	0.0124382
8621	4798.68	2	0	1	0	0	0	0.0125045
8623	4798.72	2	0	1	0	0	0	0.0124913
8625	4798.75	2	0	1	0	0	0	0.0124869
8627	4798.78	2	0	1	0	0	0	0.01245
8629	4798.82	2	0	1	0	0	0	0.0124412
8631	4798.85	2	0	1	0	0	0	0.0125011
8633	4798.88	2	0	1	0	0	0	0.0124632
8635	4798.92	2	0	1	0	0	0	0.0124733
8637	4798.95	2	0	1	0	0	0	0.0124791
8639	4798.98	2	0	1	0	0	0	0.0125163
8641	4799.02	2	0	1	0	0	0	0.0125173
8643	4799.05	2	0	1	0	0	0	0.0124591
8645	4799.08	2	0	1	0	0	0	0.0124805
8647	4799.12	2	0	1	0	0	0	0.0124788
8649	4799.15	2	0	1	0	0	0	0.0124571
8651	4799.18	2	0	1	0	0	0	0.012448
8653	4799.22	2	0	1	0	0	0	0.012472
8655	4799.25	2	0	1	0	0	0	0.0125048
8657	4799.28	2	0	1	0	0	0	0.0125184
8659	4799.32	2	0	1	0	0	0	0.0125065
8661	4799.35	2	0	1	0	0	0	0.0125424
8663	4799.38	2	0	1	0	0	0	0.0124696
8665	4799.42	2	0	1	0	0	0	0.0124876
8667	4799.45	2	0	1	0	0	0	0.0124514
8669	4799.48	2	0	1	0	0	0	0.0125058
8671	4799.52	2	0	1	0	0	0	0.0124987
8673	4799.55	2	0	1	0	0	0	0.0125028
8675	4799.58	2	0	1	0	0	0	0.0125336
8677	4799.62	2	0	1	0	0	0	0.0125065
8679	4799.65	2	0	1	0	0	0	0.0125102
8681	4799.68	2	0	1	0	0	0	0.012517
8683	4799.72	2	0	1	0	0	0	0.0125282
8685	4799.75	2	0	1	0	0	0	0.0125204
8687	4799.78	2	0	1	0	0	0	0.0125102
8689	4799.82	2	0	1	0	0	0	0.0125129
8691	4799.85	2	0	1	0	0	0	0.0125272
8693	4799.88	2	0	1	0	0	0	0.0125143
8695	4799.92	2	0	1	0	0	0	0.0125542
8697	4799.95	2	0	1	0	0	0	0.0125021
8699	4799.98	2	0	1	0	0	0	0.0124876
8701	4800.02	2	0	1	0	0	0	0.0125495
8703	4800.05	2	0	1	0	0	0	0.0124991
8705	4800.08	2	0	1	0	0	0	0.0125316
8707	4800.12	2	0	1	0	0	0	0.0125617
8709	4800.15	2	0	1	0	0	0	0.0125522
8711	4800.18	2	0	1	0	0	0	0.0125167
8713	4800.22	2	0	1	0	0	0	0.0125664
8715	4800.25	2	0	1	0	0	0	0.0125248
8717	4800.28	2	0	1	0	0	0	0.0125546
8719	4800.32	2	0	1	0	0	0	0.0126111
8721	4800.35	2	0	1	0	0	0	0.0125563
8723	4800.38	2	0	1	0	0	0	0.012581
8725	4800.42	2	0	1	0	0	0	0.0125573
8727	4800.45	2	0	1	0	0	0	0.0125245
8729	4800.48	2	0	1	0	0	0	0.0125119
8731	4800.52	2	0	1	0	0	0	0.0125363
8733	4800.55	2	0	1	0	0	0	0.0125901
8735	4800.58	2	0	1	0	0	0	0.0125241
8737	4800.62	2	0	1	0	0	0	0.0125393
8739	4800.65	2	0	1	0	0	0	0.0125576
8741	4800.68	2	0	1	0	0	0	0.0125688
8743	4800.72	2	0	1	0	0	0	0.0125356
8745	4800.75	2	0	1	0	0	0	0.012517
8747	4800.78	2	0	1	0	0	0	0.0125143
8749	4800.82	2	0	1	0	0	0	0.0125525
8751	4800.85	2	0	1	0	0	0	0.0125194
8753	4800.88	2	0	1	0	0	0	0.0124913
8755	4800.92	2	0	1	0	0	0	0.0124953
8757	4800.95	2	0	1	0	0	0	0.0124297
8759	4800.98	2	0	1	0	0	0	0.0124652
8761	4801.02	2	0	1	0	0	0	0.0124578
8763	4801.05	2	0	1	0	0	0	0.0124777
8765	4801.08	2	0	1	0	0	0	0.0124865
8767	4801.12	2	0	1	0	0	0	0.0124676
8769	4801.15	2	0	1	0	0	0	0.0124287
8771	4801.18	2	0	1	0	0	0	0.0124375
8773	4801.22	2	0	1	0	0	0	0.0124862
8775	4801.25	2	0	1	0	0	0	0.0124798
8777	4801.28	2	0	1	0	0	0	0.0124493
8779	4801.32	2	0	1	0	0	0	0.0124639
8781	4801.35	2	0	1	0	0	0	0.0124246
8783	4801.38	2	0	1	0	0	0	0.0124483
8785	4801.42	2	0	1	0	0	0	0.0124547
8787	4801.45	2	0	1	0	0	0	0.0124679
8789	4801.48	2	0	1	0	0	0	0.0124662
8791	4801.52	2	0	1	0	0	0	0.0124534
8793	4801.55	2	0	1	0	0	0	0.0124591
8795	4801.58	2	0	1	0	0	0	0.0124503
8797	4801.62	2	0	1	0	0	0	0.0124385
8799	4801.65	2	0	1	0	0	0	0.0124666
8801	4801.68	2	0	1	0	0	0	0.012429
8803	4801.72	2	0	1	0	0	0	0.0124476
8805	4801.75	2	0	1	0	0	0	0.0124578
8807	4801.78	2	0	1	0	0	0	0.0124371
8809	4801.82	2	0	1	0	0	0	0.0124615
8811	4801.85	2	0	1	0	0	0	0.0124344
8813	4801.88	2	0	1	0	0	0	0.0124229
8815	4801.92	2	0	1	0	0	0	0.0124118
8817	4801.95	2	0	1	0	0	0	0.012429
8819	4801.98	2	0	1	0	0	0	0.0123793
8821	4802.02	2	0	1	0	0	0	0.0123884
8823	4802.05	2	0	1	0	0	0	0.0124212
8825	4802.08	2	0	1	0	0	0	0.0123796
8827	4802.12	2	0	1	0	0	0	0.0123948
8829	4802.15	2	0	1	0	0	0	0.0123999
8831	4802.18	2	0	1	0	0	0	0.0123881
8833	4802.22	2	0	1	0	0	0	0.0124138
8835	4802.25	2	0	1	0	0	0	0.0123783
8837	4802.28	2	0	1	0	0	0	0.0123793
8839	4802.32	2	0	1	0	0	0	0.0123363
8841	4802.35	2	0	1	0	0	0	0.0123739
8843	4802.38	2	0	1	0	0	0	0.0124047
8845	4802.42	2	0	1	0	0	0	0.0124138
8847	4802.45	2	0	1	0	0	0	0.0124053
8849	4802.48	2	0	1	0	0	0	0.0124283
8851	4802.52	2	0	1	0	0	0	0.0124456
8853	4802.55	2	0	1	0	0	0	0.0124236
8855	4802.58	2	0	1	0	0	0	0.0124124
8857	4802.62	2	0	1	0	0	0	0.0124148
8859	4802.65	2	0	1	0	0	0	0.0124277
8861	4802.68	2	0	1	0	0	0	0.0124013
8863	4802.72	2	0	1	0	0	0	0.0124003
8865	4802.75	2	0	1	0	0	0	0.0123569
8867	4802.78	2	0	1	0	0	0	0.0124236
8869	4802.82	2	0	1	0	0	0	0.0123891
8871	4802.85	2	0	1	0	0	0	0.0123579
8873	4802.88	2	0	1	0	0	0	0.0123603
8875	4802.92	2	0	1	0	0	0	0.012383
8877	4802.95	2	0	1	0	0	0	0.0123464
8879	4802.98	2	0	1	0	0	0	0.0123701
8881	4803.02	2	0	1	0	0	0	0.0123349
8883	4803.05	2	0	1	0	0	0	0.0123891
8885	4803.08	2	0	1	0	0	0	0.0123725
8887	4803.12	2	0	1	0	0	0	0.0123617
8889	4803.15	2	0	1	0	0	0	0.0124175
8891	4803.18	2	0	1	0	0	0	0.0124091
8893	4803.22	2	0	1	0	0	0	0.0123539
8895	4803.25	2	0	1	0	0	0	0.0124192
8897	4803.28	2	0	1	0	0	0	0.0123942
8899	4803.32	2	0	1	0	0	0	0.0123931
8901	4803.35	2	0	1	0	0	0	0.0123881
8903	4803.38	2	0	1	0	0	0	0.0123911
8905	4803.42	2	0	1	0	0	0	0.0124141
8907	4803.45	2	0	1	0	0	0	0.0123448
8909	4803.48	2	0	1	0	0	0	0.0123664
8911	4803.52	2	0	1	0	0	0	0.0123434
8913	4803.55	2	0	1	0	0	0	0.0123945
8915	4803.58	2	0	1	0	0	0	0.0123393
8917	4803.62	2	0	1	0	0	0	0.0123911
8919	4803.65	2	0	1	0	0	0	0.0124107
8921	4803.68	2	0	1	0	0	0	0.0124426
8923	4803.72	2	0	1	0	0	0	0.0124676
8925	4803.75	2	0	1	0	0	0	0.01243
8927	4803.78	2	0	1	0	0	0	0.0124294
8929	4803.82	2	0	1	0	0	0	0.0123989
8931	4803.85	2	0	1	0	0	0	0.0123959
8933	4803.88	2	0	1	0	0	0	0.0124087
8935	4803.92	2	0	1	0	0	0	0.0123319
8937	4803.95	2	0	1	0	0	0	0.0123992
8939	4803.98	2	0	1	0	0	0	0.0124585
8941	4804.02	2	0	1	0	0	0	0.0123887
8943	4804.05	2	0	1	0	0	0	0.0123972
8945	4804.08	2	0	1	0	0	0	0.0123975
8947	4804.12	2	0	1	0	0	0	0.012405
8949	4804.15	2	0	1	0	0	0	0.0123877
8951	4804.18	2	0	1	0	0	0	0.0123986
8953	4804.22	2	0	1	0	0	0	0.0123722
8955	4804.25	2	0	1	0	0	0	0.0124077
8957	4804.28	2	0	1	0	0	0	0.0123921
8959	4804.32	2	0	1	0	0	0	0.0123573
8961	4804.35	2	0	1	0	0	0	0.0123715
8963	4804.38	2	0	1	0	0	0	0.0124368
8965	4804.42	2	0	1	0	0	0	0.0123393
8967	4804.45	2	0	1	0	0	0	0.0123931
8969	4804.48	2	0	1	0	0	0	0.0124043
8971	4804.52	2	0	1	0	0	0	0.0124077
8973	4804.55	2	0	1	0	0	0	0.0124368
8975	4804.58	2	0	1	0	0	0	0.0123749
8977	4804.62	2	0	1	0	0	0	0.0123992
8979	4804.65	2	0	1	0	0	0	0.0123871
8981	4804.68	2	0	1	0	0	0	0.0123752
8983	4804.72	2	0	1	0	0	0	0.0123596
8985	4804.75	2	0	1	0	0	0	0.0123999
8987	4804.78	2	0	1	0	0	0	0.0123816
8989	4804.82	2	0	1	0	0	0	0.0123695
8991	4804.85	2	0	1	0	0	0	0.0123969
8993	4804.88	2	0	1	0	0	0	0.0124202
8995	4804.92	2	0	1	0	0	0	0.0123766
8997	4804.95	2	0	1	0	0	0	0.0123657
8999	4804.98	2	0	1	0	0	0	0.0123579
9001	4805.02	2	0	1	0	0	0	0.0123559
9003	4805.05	2	0	1	0	0	0	0.0123464
9005	4805.08	2	0	1	0	0	0	0.0123695
9007	4805.12	2	0	1	0	0	0	0.012403
9009	4805.15	2	0	1	0	0	0	0.0123695
9011	4805.18	2	0	1	0	0	0	0.0123681
9013	4805.22	2	0	1	0	0	0	0.0123803
9015	4805.25	2	0	1	0	0	0	0.0123559
9017	4805.28	2	0	1	0	0	0	0.0123928
9019	4805.32	2	0	1	0	0	0	0.0123688
9021	4805.35	2	0	1	0	0	0	0.0123759
9023	4805.38	2	0	1	0	0	0	0.0123739
9025	4805.42	2	0	1	0	0	0	0.0123955
9027	4805.45	2	0	1	0	0	0	0.012364
9029	4805.48	2	0	1	0	0	0	0.0124158
9031	4805.52	2	0	1	0	0	0	0.0123843
9033	4805.55	2	0	1	0	0	0	0.0123681
9035	4805.58	2	0	1	0	0	0	0.0123979
9037	4805.62	2	0	1	0	0	0	0.0123948
9039	4805.65	2	0	1	0	0	0	0.0123722
9041	4805.68	2	0	1	0	0	0	0.0124036
9043	4805.72	2	0	1	0	0	0	0.0123752
9045	4805.75	2	0	1	0	0	0	0.0124114
9047	4805.78	2	0	1	0	0	0	0.0123752
9049	4805.82	2	0	1	0	0	0	0.0123569
9051	4805.85	2	0	1	0	0	0	0.0123728
9053	4805.88	2	0	1	0	0	0	0.0123705
9055	4805.92	2	0	1	0	0	0	0.0123688
9057	4805.95	2	0	1	0	0	0	0.0123647
9059	4805.98	2	0	1	0	0	0	0.0123173
9061	4806.02	2	0	1	0	0	0	0.0123627
9063	4806.05	2	0	1	0	0	0	0.0123833
9065	4806.08	2	0	1	0	0	0	0.0123583
9067	4806.12	2	0	1	0	0	0	0.0123387
9069	4806.15	2	0	1	0	0	0	0.0123498
9071	4806.18	2	0	1	0	0	0	0.0123339
9073	4806.22	2	0	1	0	0	0	0.0123238
9075	4806.25	2	0	1	0	0	0	0.0123336
9077	4806.28	2	0	1	0	0	0	0.0123126
9079	4806.32	2	0	1	0	0	0	0.0123393
9081	4806.35	2	0	1	0	0	0	0.0123515
9083	4806.38	2	0	1	0	0	0	0.0124175
9085	4806.42	2	0	1	0	0	0	0.0124338
9087	4806.45	2	0	1	0	0	0	0.0124365
9089	4806.48	2	0	1	0	0	0	0.0124436
9091	4806.52	2	0	1	0	0	0	0.012449
9093	4806.55	2	0	1	0	0	0	0.0124246
9095	4806.58	2	0	1	0	0	0	0.0124222
9097	4806.62	2	0	1	0	0	0	0.0124334
9099	4806.65	2	0	1	0	0	0	0.0124182
9101	4806.68	2	0	1	0	0	0	0.0123982
9103	4806.72	2	0	1	0	0	0	0.0124463
9105	4806.75	2	0	1	0	0	0	0.0124331
9107	4806.78	2	0	1	0	0	0	0.012449
9109	4806.82	2	0	1	0	0	0	0.0123999
9111	4806.85	2	0	1	0	0	0	0.0124554
9113	4806.88	2	0	1	0	0	0	0.0124216
9115	4806.92	2	0	1	0	0	0	0.0124033
9117	4806.95	2	0	1	0	0	0	0.01243
9119	4806.98	2	0	1	0	0	0	0.0124233
9121	4807.02	2	0	1	0	0	0	0.0124155
9123	4807.05	2	0	1	0	0	0	0.0124415
9125	4807.08	2	0	1	0	0	0	0.0123996
9127	4807.12	2	0	1	0	0	0	0.0124087
9129	4807.15	2	0	1	0	0	0	0.0123705
9131	4807.18	2	0	1	0	0	0	0.0124047
9133	4807.22	2	0	1	0	0	0	0.0124101
9135	4807.25	2	0	1	0	0	0	0.0124124
9137	4807.28	2	0	1	0	0	0	0.0123705
9139	4807.32	2	0	1	0	0	0	0.0123982
9141	4807.35	2	0	1	0	0	0	0.0123871
9143	4807.38	2	0	1	0	0	0	0.0123711
9145	4807.42	2	0	1	0	0	0	0.012386
9147	4807.45	2	0	1	0	0	0	0.0124091
9149	4807.48	2	0	1	0	0	0	0.0123749
9151	4807.52	2	0	1	0	0	0	0.0123766
9153	4807.55	2	0	1	0	0	0	0.0123728
9155	4807.58	2	0	1	0	0	0	0.0123505
9157	4807.62	2	0	1	0	0	0	0.0123613
9159	4807.65	2	0	1	0	0	0	0.0123921
9161	4807.68	2	0	1	0	0	0	0.0123755
9163	4807.72	2	0	1	0	0	0	0.0123725
9165	4807.75	2	0	1	0	0	0	0.0123434
9167	4807.78	2	0	1	0	0	0	0.0123651
9169	4807.82	2	0	1	0	0	0	0.0123495
9171	4807.85	2	0	1	0	0	0	0.0123424
9173	4807.88	2	0	1	0	0	0	0.0123607
9175	4807.92	2	0	1	0	0	0	0.0123799
9177	4807.95	2	0	1	0	0	0	0.0124321
9179	4807.98	2	0	1	0	0	0	0.0124466
9181	4808.02	2	0	1	0	0	0	0.0124818
9183	4808.05	2	0	1	0	0	0	0.0124835
9185	4808.08	2	0	1	0	0	0	0.0124216
9187	4808.12	2	0	1	0	0	0	0.0124744
9189	4808.15	2	0	1	0	0	0	0.0124794
9191	4808.18	2	0	1	0	0	0	0.0124314
9193	4808.22	2	0	1	0	0	0	0.0124382
9195	4808.25	2	0	1	0	0	0	0.012429
9197	4808.28	2	0	1	0	0	0	0.0125075
9199	4808.32	2	0	1	0	0	0	0.0124761
9201	4808.35	2	0	1	0	0	0	0.0124686
9203	4808.38	2	0	1	0	0	0	0.0124497
9205	4808.42	2	0	1	0	0	0	0.0124348
9207	4808.45	2	0	1	0	0	0	0.01247
9209	4808.48	2	0	1	0	0	0	0.0124913
9211	4808.52	2	0	1	0	0	0	0.0124974
9213	4808.55	2	0	1	0	0	0	0.0125045
9215	4808.58	2	0	1	0	0	0	0.0125096
9217	4808.62	2	0	1	0	0	0	0.0124896
9219	4808.65	2	0	1	0	0	0	0.0124537
9221	4808.68	2	0	1	0	0	0	0.0125522
9223	4808.72	2	0	1	0	0	0	0.0125302
9225	4808.75	2	0	1	0	0	0	0.0125146
9227	4808.78	2	0	1	0	0	0	0.0125038
9229	4808.82	2	0	1	0	0	0	0.0125201
9231	4808.85	2	0	1	0	0	0	0.012517
9233	4808.88	2	0	1	0	0	0	0.0125058
9235	4808.92	2	0	1	0	0	0	0.0125299
9237	4808.95	2	0	1	0	0	0	0.012473
9239	4808.98	2	0	1	0	0	0	0.0125201
9241	4809.02	2	0	1	0	0	0	0.012473
9243	4809.05	2	0	1	0	0	0	0.012518
9245	4809.08	2	0	1	0	0	0	0.0124717
9247	4809.12	2	0	1	0	0	0	0.0124679
9249	4809.15	2	0	1	0	0	0	0.0124886
9251	4809.18	2	0	1	0	0	0	0.012496
9253	4809.22	2	0	1	0	0	0	0.0124893
9255	4809.25	2	0	1	0	0	0	0.0124412
9257	4809.28	2	0	1	0	0	0	0.0124145
9259	4809.32	2	0	1	0	0	0	0.0123992
9261	4809.35	2	0	1	0	0	0	0.0124662
9263	4809.38	2	0	1	0	0	0	0.0124561
9265	4809.42	2	0	1	0	0	0	0.0124771
9267	4809.45	2	0	1	0	0	0	0.0124547
9269	4809.48	2	0	1	0	0	0	0.0124006
9271	4809.52	2	0	1	0	0	0	0.0124486
9273	4809.55	2	0	1	0	0	0	0.0124195
9275	4809.58	2	0	1	0	0	0	0.0124412
9277	4809.62	2	0	1	0	0	0	0.0124053
9279	4809.65	2	0	1	0	0	0	0.0124256
9281	4809.68	2	0	1	0	0	0	0.012385
9283	4809.72	2	0	1	0	0	0	0.0124266
9285	4809.75	2	0	1	0	0	0	0.0124158
9287	4809.78	2	0	1	0	0	0	0.0124209
9289	4809.82	2	0	1	0	0	0	0.0123972
9291	4809.85	2	0	1	0	0	0	0.0124317
9293	4809.88	2	0	1	0	0	0	0.012427
9295	4809.92	2	0	1	0	0	0	0.0124236
9297	4809.95	2	0	1	0	0	0	0.0124199
9299	4809.98	2	0	1	0	0	0	0.0124178
9301	4810.02	2	0	1	0	0	0	0.0124053
9303	4810.05	2	0	1	0	0	0	0.0124307
9305	4810.08	2	0	1	0	0	0	0.0124053
9307	4810.12	2	0	1	0	0	0	0.012403
9309	4810.15	2	0	1	0	0	0	0.0124341
9311	4810.18	2	0	1	0	0	0	0.0124009
9313	4810.22	2	0	1	0	0	0	0.012451
9315	4810.25	2	0	1	0	0	0	0.0124178
9317	4810.28	2	0	1	0	0	0	0.0124131
9319	4810.32	2	0	1	0	0	0	0.0124432
9321	4810.35	2	0	1	0	0	0	0.0125028
9323	4810.38	2	0	1	0	0	0	0.012431
9325	4810.42	2	0	1	0	0	0	0.0124158
9327	4810.45	2	0	1	0	0	0	0.0124409
9329	4810.48	2	0	1	0	0	0	0.0124155
9331	4810.52	2	0	1	0	0	0	0.0124243
9333	4810.55	2	0	1	0	0	0	0.012448
9335	4810.58	2	0	1	0	0	0	0.0124168
9337	4810.62	2	0	1	0	0	0	0.0124662
9339	4810.65	2	0	1	0	0	0	0.0124412
9341	4810.68	2	0	1	0	0	0	0.0124514
9343	4810.72	2	0	1	0	0	0	0.0124131
9345	4810.75	2	0	1	0	0	0	0.0124754
9347	4810.78	2	0	1	0	0	0	0.0124277
9349	4810.82	2	0	1	0	0	0	0.0124297
9351	4810.85	2	0	1	0	0	0	0.012451
9353	4810.88	2	0	1	0	0	0	0.0124436
9355	4810.92	2	0	1	0	0	0	0.0124476
9357	4810.95	2	0	1	0	0	0	0.0124236
9359	4810.98	2	0	1	0	0	0	0.012452
9361	4811.02	2	0	1	0	0	0	0.0124331
9363	4811.05	2	0	1	0	0	0	0.0124717
9365	4811.08	2	0	1	0	0	0	0.0124283
9367	4811.12	2	0	1	0	0	0	0.0124402
9369	4811.15	2	0	1	0	0	0	0.0124321
9371	4811.18	2	0	1	0	0	0	0.012448
9373	4811.22	2	0	1	0	0	0	0.0124432
9375	4811.25	2	0	1	0	0	0	0.0124361
9377	4811.28	2	0	1	0	0	0	0.0124118
9379	4811.32	2	0	1	0	0	0	0.0124304
9381	4811.35	2	0	1	0	0	0	0.0124913
9383	4811.38	2	0	1	0	0	0	0.0124544
9385	4811.42	2	0	1	0	0	0	0.0124747
9387	4811.45	2	0	1	0	0	0	0.012475
9389	4811.48	2	0	1	0	0	0	0.0124344
9391	4811.52	2	0	1	0	0	0	0.0124517
9393	4811.55	2	0	1	0	0	0	0.0124805
9395	4811.58	2	0	1	0	0	0	0.0124869
9397	4811.62	2	0	1	0	0	0	0.0124547
9399	4811.65	2	0	1	0	0	0	0.0124287
9401	4811.68	2	0	1	0	0	0	0.0124568
9403	4811.72	2	0	1	0	0	0	0.0124991
9405	4811.75	2	0	1	0	0	0	0.0124165
9407	4811.78	2	0	1	0	0	0	0.0124321
9409	4811.82	2	0	1	0	0	0	0.0124324
9411	4811.85	2	0	1	0	0	0	0.012427
9413	4811.88	2	0	1	0	0	0	0.0124243
9415	4811.92	2	0	1	0	0	0	0.0124212
9417	4811.95	2	0	1	0	0	0	0.0124141
9419	4811.98	2	0	1	0	0	0	0.0124246
9421	4812.02	2	0	1	0	0	0	0.0124432
9423	4812.05	2	0	1	0	0	0	0.0124104
9425	4812.08	2	0	1	0	0	0	0.0124781
9427	4812.12	2	0	1	0	0	0	0.0124656
9429	4812.15	2	0	1	0	0	0	0.0124138
9431	4812.18	2	0	1	0	0	0	0.0123816
9433	4812.22	2	0	1	0	0	0	0.0124124
9435	4812.25	2	0	1	0	0	0	0.0124287
9437	4812.28	2	0	1	0	0	0	0.0123989
9439	4812.32	2	0	1	0	0	0	0.0124226
9441	4812.35	2	0	1	0	0	0	0.0124432
9443	4812.38	2	0	1	0	0	0	0.0124314
9445	4812.42	2	0	1	0	0	0	0.012425
9447	4812.45	2	0	1	0	0	0	0.0124415
9449	4812.48	2	0	1	0	0	0	0.0124632
9451	4812.52	2	0	1	0	0	0	0.0124118
9453	4812.55	2	0	1	0	0	0	0.0124388
9455	4812.58	2	0	1	0	0	0	0.0123996
9457	4812.62	2	0	1	0	0	0	0.0124273
9459	4812.65	2	0	1	0	0	0	0.012386
9461	4812.68	2	0	1	0	0	0	0.0124151
9463	4812.72	2	0	1	0	0	0	0.0123982
9465	4812.75	2	0	1	0	0	0	0.0123532
9467	4812.78	2	0	1	0	0	0	0.012381
9469	4812.82	2	0	1	0	0	0	0.0124168
9471	4812.85	2	0	1	0	0	0	0.0123921
9473	4812.88	2	0	1	0	0	0	0.0123799
9475	4812.92	2	0	1	0	0	0	0.0123959
9477	4812.95	2	0	1	0	0	0	0.0124239
9479	4812.98	2	0	1	0	0	0	0.0124503
9481	4813.02	2	0	1	0	0	0	0.0124155
9483	4813.05	2	0	1	0	0	0	0.0124564
9485	4813.08	2	0	1	0	0	0	0.0124067
9487	4813.12	2	0	1	0	0	0	0.0124473
9489	4813.15	2	0	1	0	0	0	0.0124916
9491	4813.18	2	0	1	0	0	0	0.0124544
9493	4813.22	2	0	1	0	0	0	0.0124514
9495	4813.25	2	0	1	0	0	0	0.0124784
9497	4813.28	2	0	1	0	0	0	0.0124375
9499	4813.32	2	0	1	0	0	0	0.0124239
9501	4813.35	2	0	1	0	0	0	0.0124256
9503	4813.38	2	0	1	0	0	0	0.0124571
9505	4813.42	2	0	1	0	0	0	0.0124341
9507	4813.45	2	0	1	0	0	0	0.0124368
9509	4813.48	2	0	1	0	0	0	0.0124209
9511	4813.52	2	0	1	0	0	0	0.0124398
9513	4813.55	2	0	1	0	0	0	0.0124788
9515	4813.58	2	0	1	0	0	0	0.0124635
9517	4813.62	2	0	1	0	0	0	0.0124693
9519	4813.65	2	0	1	0	0	0	0.0124233
9521	4813.68	2	0	1	0	0	0	0.0124297
9523	4813.72	2	0	1	0	0	0	0.0124094
9525	4813.75	2	0	1	0	0	0	0.0124128
9527	4813.78	2	0	1	0	0	0	0.0124324
9529	4813.82	2	0	1	0	0	0	0.0123935
9531	4813.85	2	0	1	0	0	0	0.0123972
9533	4813.88	2	0	1	0	0	0	0.0123684
9535	4813.92	2	0	1	0	0	0	0.0123525
9537	4813.95	2	0	1	0	0	0	0.0124043
9539	4813.98	2	0	1	0	0	0	0.0123573
9541	4814.02	2	0	1	0	0	0	0.0124026
9543	4814.05	2	0	1	0	0	0	0.0123837
9545	4814.08	2	0	1	0	0	0	0.0124155
9547	4814.12	2	0	1	0	0	0	0.0124111
9549	4814.15	2	0	1	0	0	0	0.0123766
9551	4814.18	2	0	1	0	0	0	0.0123928
9553	4814.22	2	0	1	0	0	0	0.0123698
9555	4814.25	2	0	1	0	0	0	0.0123948
9557	4814.28	2	0	1	0	0	0	0.0123911
9559	4814.32	2	0	1	0	0	0	0.0123579
9561	4814.35	2	0	1	0	0	0	0.0123424
9563	4814.38	2	0	1	0	0	0	0.0123684
9565	4814.42	2	0	1	0	0	0	0.0123319
9567	4814.45	2	0	1	0	0	0	0.0123647
9569	4814.48	2	0	1	0	0	0	0.01236
9571	4814.52	2	0	1	0	0	0	0.0123536
9573	4814.55	2	0	1	0	0	0	0.0123569
9575	4814.58	2	0	1	0	0	0	0.0123532
9577	4814.62	2	0	1	0	0	0	0.0123813
9579	4814.65	2	0	1	0	0	0	0.0123708
9581	4814.68	2	0	1	0	0	0	0.0123031
9583	4814.72	2	0	1	0	0	0	0.0123532
9585	4814.75	2	0	1	0	0	0	0.0123711
9587	4814.78	2	0	1	0	0	0	0.0124135
9589	4814.82	2	0	1	0	0	0	0.012404
9591	4814.85	2	0	1	0	0	0	0.0123874
9593	4814.88	2	0	1	0	0	0	0.0124067
9595	4814.92	2	0	1	0	0	0	0.0123691
9597	4814.95	2	0	1	0	0	0	0.0123708
9599	4814.98	2	0	1	0	0	0	0.0123928
9601	4815.02	2	0	1	0	0	0	0.0123265
9603	4815.05	2	0	1	0	0	0	0.0123508
9605	4815.08	2	0	1	0	0	0	0.01232
9607	4815.12	2	0	1	0	0	0	0.0123515
9609	4815.15	2	0	1	0	0	0	0.0123823
9611	4815.18	2	0	1	0	0	0	0.0124009
9613	4815.22	2	0	1	0	0	0	0.0124063
9615	4815.25	2	0	1	0	0	0	0.0123789
9617	4815.28	2	0	1	0	0	0	0.0123718
9619	4815.32	2	0	1	0	0	0	0.0123901
9621	4815.35	2	0	1	0	0	0	0.0123975
9623	4815.38	2	0	1	0	0	0	0.0123346
9625	4815.42	2	0	1	0	0	0	0.0123258
9627	4815.45	2	0	1	0	0	0	0.0123336
9629	4815.48	2	0	1	0	0	0	0.0123437
9631	4815.52	2	0	1	0	0	0	0.0123651
9633	4815.55	2	0	1	0	0	0	0.0123901
9635	4815.58	2	0	1	0	0	0	0.0124033
9637	4815.62	2	0	1	0	0	0	0.0123881
9639	4815.65	2	0	1	0	0	0	0.0123546
9641	4815.68	2	0	1	0	0	0	0.0123454
9643	4815.72	2	0	1	0	0	0	0.0123793
9645	4815.75	2	0	1	0	0	0	0.0123468
9647	4815.78	2	0	1	0	0	0	0.012364
9649	4815.82	2	0	1	0	0	0	0.012359
9651	4815.85	2	0	1	0	0	0	0.0123661
9653	4815.88	2	0	1	0	0	0	0.0123843
9655	4815.92	2	0	1	0	0	0	0.0123305
9657	4815.95	2	0	1	0	0	0	0.0123661
9659	4815.98	2	0	1	0	0	0	0.0123688
9661	4816.02	2	0	1	0	0	0	0.0123962
9663	4816.05	2	0	1	0	0	0	0.0123786
9665	4816.08	2	0	1	0	0	0	0.0123681
9667	4816.12	2	0	1	0	0	0	0.0123711
9669	4816.15	2	0	1	0	0	0	0.0123519
9671	4816.18	2	0	1	0	0	0	0.0123698
9673	4816.22	2	0	1	0	0	0	0.0123471
9675	4816.25	2	0	1	0	0	0	0.0123725
9677	4816.28	2	0	1	0	0	0	0.0123441
9679	4816.32	2	0	1	0	0	0	0.0123475
9681	4816.35	2	0	1	0	0	0	0.0123404
9683	4816.38	2	0	1	0	0	0	0.0123843
9685	4816.42	2	0	1	0	0	0	0.0123617
9687	4816.45	2	0	1	0	0	0	0.0123762
9689	4816.48	2	0	1	0	0	0	0.0123718
9691	4816.52	2	0	1	0	0	0	0.0123864
9693	4816.55	2	0	1	0	0	0	0.0123336
9695	4816.58	2	0	1	0	0	0	0.012315
9697	4816.62	2	0	1	0	0	0	0.0123224
9699	4816.65	2	0	1	0	0	0	0.0123515
9701	4816.68	2	0	1	0	0	0	0.0123417
9703	4816.72	2	0	1	0	0	0	0.0123417
9705	4816.75	2	0	1	0	0	0	0.012359
9707	4816.78	2	0	1	0	0	0	0.0123512
9709	4816.82	2	0	1	0	0	0	0.0123799
9711	4816.85	2	0	1	0	0	0	0.0123904
9713	4816.88	2	0	1	0	0	0	0.0123261
9715	4816.92	2	0	1	0	0	0	0.0123674
9717	4816.95	2	0	1	0	0	0	0.0123847
9719	4816.98	2	0	1	0	0	0	0.0123698
9721	4817.02	2	0	1	0	0	0	0.0123268
9723	4817.05	2	0	1	0	0	0	0.0123613
9725	4817.08	2	0	1	0	0	0	0.0123674
9727	4817.12	2	0	1	0	0	0	0.0123143
9729	4817.15	2	0	1	0	0	0	0.012359
9731	4817.18	2	0	1	0	0	0	0.0123133
9733	4817.22	2	0	1	0	0	0	0.0123603
9735	4817.25	2	0	1	0	0	0	0.0123319
9737	4817.28	2	0	1	0	0	0	0.0123397
9739	4817.32	2	0	1	0	0	0	0.0123112
9741	4817.35	2	0	1	0	0	0	0.0123231
9743	4817.38	2	0	1	0	0	0	0.0123221
9745	4817.42	2	0	1	0	0	0	0.0123539
9747	4817.45	2	0	1	0	0	0	0.0123322
9749	4817.48	2	0	1	0	0	0	0.0123735
9751	4817.52	2	0	1	0	0	0	0.0123515
9753	4817.55	2	0	1	0	0	0	0.0123167
9755	4817.58	2	0	1	0	0	0	0.0123962
9757	4817.62	2	0	1	0	0	0	0.0123522
9759	4817.65	2	0	1	0	0	0	0.0123437
9761	4817.68	2	0	1	0	0	0	0.0123569
9763	4817.72	2	0	1	0	0	0	0.0123109
9765	4817.75	2	0	1	0	0	0	0.0123224
9767	4817.78	2	0	1	0	0	0	0.0123627
9769	4817.82	2	0	1	0	0	0	0.0123613
9771	4817.85	2	0	1	0	0	0	0.0123718
9773	4817.88	2	0	1	0	0	0	0.0123759
9775	4817.92	2	0	1	0	0	0	0.0123404
9777	4817.95	2	0	1	0	0	0	0.0123864
9779	4817.98	2	0	1	0	0	0	0.0123427
9781	4818.02	2	0	1	0	0	0	0.0123383
9783	4818.05	2	0	1	0	0	0	0.0123228
9785	4818.08	2	0	1	0	0	0	0.0123512
9787	4818.12	2	0	1	0	0	0	0.0123515
9789	4818.15	2	0	1	0	0	0	0.012338
9791	4818.18	2	0	1	0	0	0	0.0123417
9793	4818.22	2	0	1	0	0	0	0.0123552
9795	4818.25	2	0	1	0	0	0	0.0122926
9797	4818.28	2	0	1	0	0	0	0.0123898
9799	4818.32	2	0	1	0	0	0	0.0123265
9801	4818.35	2	0	1	0	0	0	0.012317
9803	4818.38	2	0	1	0	0	0	0.0123495
9805	4818.42	2	0	1	0	0	0	0.0122828
9807	4818.45	2	0	1	0	0	0	0.0123397
9809	4818.48	2	0	1	0	0	0	0.0123062
9811	4818.52	2	0	1	0	0	0	0.0123525
9813	4818.55	2	0	1	0	0	0	0.0123492
9815	4818.58	2	0	1	0	0	0	0.0123478
9817	4818.62	2	0	1	0	0	0	0.0123461
9819	4818.65	2	0	1	0	0	0	0.0123563
9821	4818.68	2	0	1	0	0	0	0.012361
9823	4818.72	2	0	1	0	0	0	0.012385
9825	4818.75	2	0	1	0	0	0	0.012385
9827	4818.78	2	0	1	0	0	0	0.0123742
9829	4818.82	2	0	1	0	0	0	0.0123739
9831	4818.85	2	0	1	0	0	0	0.0123891
9833	4818.88	2	0	1	0	0	0	0.0123752
9835	4818.92	2	0	1	0	0	0	0.0123908
9837	4818.95	2	0	1	0	0	0	0.0123701
9839	4818.98	2	0	1	0	0	0	0.0123783
9841	4819.02	2	0	1	0	0	0	0.0124101
9843	4819.05	2	0	1	0	0	0	0.0124006
9845	4819.08	2	0	1	0	0	0	0.0123705
9847	4819.12	2	0	1	0	0	0	0.0124097
9849	4819.15	2	0	1	0	0	0	0.0123759
9851	4819.18	2	0	1	0	0	0	0.0123292
9853	4819.22	2	0	1	0	0	0	0.0123437
9855	4819.25	2	0	1	0	0	0	0.0123431
9857	4819.28	2	0	1	0	0	0	0.0123407
9859	4819.32	2	0	1	0	0	0	0.0123674
9861	4819.35	2	0	1	0	0	0	0.0123437
9863	4819.38	2	0	1	0	0	0	0.0123911
9865	4819.42	2	0	1	0	0	0	0.0123837
9867	4819.45	2	0	1	0	0	0	0.0123816
9869	4819.48	2	0	1	0	0	0	0.0123464
9871	4819.52	2	0	1	0	0	0	0.0123579
9873	4819.55	2	0	1	0	0	0	0.0123901
9875	4819.58	2	0	1	0	0	0	0.0123552
9877	4819.62	2	0	1	0	0	0	0.012408
9879	4819.65	2	0	1	0	0	0	0.0123519
9881	4819.68	2	0	1	0	0	0	0.0123542
9883	4819.72	2	0	1	0	0	0	0.0124135
9885	4819.75	2	0	1	0	0	0	0.0123975
9887	4819.78	2	0	1	0	0	0	0.0123749
9889	4819.82	2	0	1	0	0	0	0.0124192
9891	4819.85	2	0	1	0	0	0	0.0124368
9893	4819.88	2	0	1	0	0	0	0.0124547
9895	4819.92	2	0	1	0	0	0	0.0124219
9897	4819.95	2	0	1	0	0	0	0.0123975
9899	4819.98	2	0	1	0	0	0	0.0124432
9901	4820.02	2	0	1	0	0	0	0.0124321
9903	4820.05	2	0	1	0	0	0	0.012474
9905	4820.08	2	0	1	0	0	0	0.0124212
9907	4820.12	2	0	1	0	0	0	0.0124524
9909	4820.15	2	0	1	0	0	0	0.0124378
9911	4820.18	2	0	1	0	0	0	0.0124233
9913	4820.22	2	0	1	0	0	0	0.012472
9915	4820.25	2	0	1	0	0	0	0.0124551
9917	4820.28	2	0	1	0	0	0	0.0124656
9919	4820.32	2	0	1	0	0	0	0.0124676
9921	4820.35	2	0	1	0	0	0	0.0124629
9923	4820.38	2	0	1	0	0	0	0.0124832
9925	4820.42	2	0	1	0	0	0	0.0124236
9927	4820.45	2	0	1	0	0	0	0.0124947
9929	4820.48	2	0	1	0	0	0	0.0124436
9931	4820.52	2	0	1	0	0	0	0.0124693
9933	4820.55	2	0	1	0	0	0	0.012492
9935	4820.58	2	0	1	0	0	0	0.0124886
9937	4820.62	2	0	1	0	0	0	0.0124953
9939	4820.65	2	0	1	0	0	0	0.0125214
9941	4820.68	2	0	1	0	0	0	0.0124849
9943	4820.72	2	0	1	0	0	0	0.0124747
9945	4820.75	2	0	1	0	0	0	0.0124754
9947	4820.78	2	0	1	0	0	0	0.0124964
9949	4820.82	2	0	1	0	0	0	0.0125072
9951	4820.85	2	0	1	0	0	0	0.0124811
9953	4820.88	2	0	1	0	0	0	0.012452
9955	4820.92	2	0	1	0	0	0	0.0124869
9957	4820.95	2	0	1	0	0	0	0.0124507
9959	4820.98	2	0	1	0	0	0	0.0124358
9961	4821.02	2	0	1	0	0	0	0.0124656
9963	4821.05	2	0	1	0	0	0	0.0124365
9965	4821.08	2	0	1	0	0	0	0.0124074
9967	4821.12	2	0	1	0	0	0	0.0124365
9969	4821.15	2	0	1	0	0	0	0.01247
9971	4821.18	2	0	1	0	0	0	0.012451
9973	4821.22	2	0	1	0	0	0	0.0125106
9975	4821.25	2	0	1	0	0	0	0.0124977
9977	4821.28	2	0	1	0	0	0	0.0124889
9979	4821.32	2	0	1	0	0	0	0.0124923
9981	4821.35	2	0	1	0	0	0	0.0125082
9983	4821.38	2	0	1	0	0	0	0.0124781
9985	4821.42	2	0	1	0	0	0	0.0125079
9987	4821.45	2	0	1	0	0	0	0.012492
9989	4821.48	2	0	1	0	0	0	0.0124869
9991	4821.52	2	0	1	0	0	0	0.0125173
9993	4821.55	2	0	1	0	0	0	0.0125146
9995	4821.58	2	0	1	0	0	0	0.0125478
9997	4821.62	2	0	1	0	0	0	0.0124974
9999	4821.65	2	0	1	0	0	0	0.0125532
10001	4821.68	2	0	1	0	0	0	0.0125004
10003	4821.72	2	0	1	0	0	0	0.0125481
10005	4821.75	2	0	1	0	0	0	0.012541
10007	4821.78	2	0	1	0	0	0	0.0125052
10009	4821.82	2	0	1	0	0	0	0.0125519
10011	4821.85	2	0	1	0	0	0	0.0125796
10013	4821.88	2	0	1	0	0	0	0.0125827
10015	4821.92	2	0	1	0	0	0	0.0125708
10017	4821.95	2	0	1	0	0	0	0.0126294
10019	4821.98	2	0	1	0	0	0	0.0126351
10021	4822.02	2	0	1	0	0	0	0.0125722
10023	4822.05	2	0	1	0	0	0	0.0126047
10025	4822.08	2	0	1	0	0	0	0.0125735
10027	4822.12	2	0	1	0	0	0	0.0125844
10029	4822.15	2	0	1	0	0	0	0.012604
10031	4822.18	2	0	1	0	0	0	0.0125688
10033	4822.22	2	0	1	0	0	0	0.0125461
10035	4822.25	2	0	1	0	0	0	0.0125502
10037	4822.28	2	0	1	0	0	0	0.0125322
10039	4822.32	2	0	1	0	0	0	0.0125495
10041	4822.35	2	0	1	0	0	0	0.0125529
10043	4822.38	2	0	1	0	0	0	0.0125011
10045	4822.42	2	0	1	0	0	0	0.0124761
10047	4822.45	2	0	1	0	0	0	0.0125241
10049	4822.48	2	0	1	0	0	0	0.0124923
10051	4822.52	2	0	1	0	0	0	0.0124906
10053	4822.55	2	0	1	0	0	0	0.0125113
10055	4822.58	2	0	1	0	0	0	0.0124754
10057	4822.62	2	0	1	0	0	0	0.0124855
10059	4822.65	2	0	1	0	0	0	0.0124591
10061	4822.68	2	0	1	0	0	0	0.0124486
10063	4822.72	2	0	1	0	0	0	0.0124605
10065	4822.75	2	0	1	0	0	0	0.01247
10067	4822.78	2	0	1	0	0	0	0.0124642
10069	4822.82	2	0	1	0	0	0	0.0124551
10071	4822.85	2	0	1	0	0	0	0.0124449
10073	4822.88	2	0	1	0	0	0	0.0124114
10075	4822.92	2	0	1	0	0	0	0.0124388
10077	4822.95	2	0	1	0	0	0	0.0124459
10079	4822.98	2	0	1	0	0	0	0.0123813
10081	4823.02	2	0	1	0	0	0	0.0124449
10083	4823.05	2	0	1	0	0	0	0.0124138
10085	4823.08	2	0	1	0	0	0	0.012405
10087	4823.12	2	0	1	0	0	0	0.0123634
10089	4823.15	2	0	1	0	0	0	0.0123931
10091	4823.18	2	0	1	0	0	0	0.0123992
10093	4823.22	2	0	1	0	0	0	0.012383
10095	4823.25	2	0	1	0	0	0	0.0124145
10097	4823.28	2	0	1	0	0	0	0.0123695
10099	4823.32	2	0	1	0	0	0	0.0123651
10101	4823.35	2	0	1	0	0	0	0.0123722
10103	4823.38	2	0	1	0	0	0	0.0123488
10105	4823.42	2	0	1	0	0	0	0.0123742
10107	4823.45	2	0	1	0	0	0	0.0123542
10109	4823.48	2	0	1	0	0	0	0.0123495
10111	4823.52	2	0	1	0	0	0	0.0123448
10113	4823.55	2	0	1	0	0	0	0.0123451
10115	4823.58	2	0	1	0	0	0	0.012339
10117	4823.62	2	0	1	0	0	0	0.0123278
10119	4823.65	2	0	1	0	0	0	0.012339
10121	4823.68	2	0	1	0	0	0	0.0123041
10123	4823.72	2	0	1	0	0	0	0.0122987
10125	4823.75	2	0	1	0	0	0	0.0123075
10127	4823.78	2	0	1	0	0	0	0.0123512
10129	4823.82	2	0	1	0	0	0	0.0123417
10131	4823.85	2	0	1	0	0	0	0.0123444
10133	4823.88	2	0	1	0	0	0	0.012384
10135	4823.92	2	0	1	0	0	0	0.0123407
10137	4823.95	2	0	1	0	0	0	0.0123255
10139	4823.98	2	0	1	0	0	0	0.0123464
10141	4824.02	2	0	1	0	0	0	0.0122953
10143	4824.05	2	0	1	0	0	0	0.0123099
10145	4824.08	2	0	1	0	0	0	0.0123126
10147	4824.12	2	0	1	0	0	0	0.0123288
10149	4824.15	2	0	1	0	0	0	0.0122815
10151	4824.18	2	0	1	0	0	0	0.0122473
10153	4824.22	2	0	1	0	0	0	0.0122997
10155	4824.25	2	0	1	0	0	0	0.0123177
10157	4824.28	2	0	1	0	0	0	0.0122815
10159	4824.32	2	0	1	0	0	0	0.0123244
10161	4824.35	2	0	1	0	0	0	0.0123288
10163	4824.38	2	0	1	0	0	0	0.0122913
10165	4824.42	2	0	1	0	0	0	0.012341
10167	4824.45	2	0	1	0	0	0	0.0122744
10169	4824.48	2	0	1	0	0	0	0.0123119
10171	4824.52	2	0	1	0	0	0	0.0123001
10173	4824.55	2	0	1	0	0	0	0.0122964
10175	4824.58	2	0	1	0	0	0	0.0123075
10177	4824.62	2	0	1	0	0	0	0.0123258
10179	4824.65	2	0	1	0	0	0	0.0123211
10181	4824.68	2	0	1	0	0	0	0.0123014
10183	4824.72	2	0	1	0	0	0	0.0123234
10185	4824.75	2	0	1	0	0	0	0.0123404
10187	4824.78	2	0	1	0	0	0	0.0123217
10189	4824.82	2	0	1	0	0	0	0.0123156
10191	4824.85	2	0	1	0	0	0	0.0123028
10193	4824.88	2	0	1	0	0	0	0.0123248
10195	4824.92	2	0	1	0	0	0	0.0122744
10197	4824.95	2	0	1	0	0	0	0.0123251
10199	4824.98	2	0	1	0	0	0	0.0123366
10201	4825.02	2	0	1	0	0	0	0.0123238
10203	4825.05	2	0	1	0	0	0	0.0122977
10205	4825.08	2	0	1	0	0	0	0.0123038
10207	4825.12	2	0	1	0	0	0	0.0122974
10209	4825.15	2	0	1	0	0	0	0.0122947
10211	4825.18	2	0	1	0	0	0	0.0122754
10213	4825.22	2	0	1	0	0	0	0.0122849
10215	4825.25	2	0	1	0	0	0	0.0123197
10217	4825.28	2	0	1	0	0	0	0.0122937
10219	4825.32	2	0	1	0	0	0	0.0123292
10221	4825.35	2	0	1	0	0	0	0.0123001
10223	4825.38	2	0	1	0	0	0	0.012315
10225	4825.42	2	0	1	0	0	0	0.0122964
10227	4825.45	2	0	1	0	0	0	0.0123143
10229	4825.48	2	0	1	0	0	0	0.0123407
10231	4825.52	2	0	1	0	0	0	0.0123356
10233	4825.55	2	0	1	0	0	0	0.0123099
10235	4825.58	2	0	1	0	0	0	0.0123417
10237	4825.62	2	0	1	0	0	0	0.0123204
10239	4825.65	2	0	1	0	0	0	0.0122788
10241	4825.68	2	0	1	0	0	0	0.0123302
10243	4825.72	2	0	1	0	0	0	0.0122981
10245	4825.75	2	0	1	0	0	0	0.012295
10247	4825.78	2	0	1	0	0	0	0.0122842
10249	4825.82	2	0	1	0	0	0	0.0123099
10251	4825.85	2	0	1	0	0	0	0.0122771
10253	4825.88	2	0	1	0	0	0	0.0123204
10255	4825.92	2	0	1	0	0	0	0.0123004
10257	4825.95	2	0	1	0	0	0	0.0122791
10259	4825.98	2	0	1	0	0	0	0.0122926
10261	4826.02	2	0	1	0	0	0	0.0123021
10263	4826.05	2	0	1	0	0	0	0.0122612
10265	4826.08	2	0	1	0	0	0	0.0123011
10267	4826.12	2	0	1	0	0	0	0.0122679
10269	4826.15	2	0	1	0	0	0	0.0122808
10271	4826.18	2	0	1	0	0	0	0.0122689
10273	4826.22	2	0	1	0	0	0	0.0122551
10275	4826.25	2	0	1	0	0	0	0.0122835
10277	4826.28	2	0	1	0	0	0	0.0122933
10279	4826.32	2	0	1	0	0	0	0.012251
10281	4826.35	2	0	1	0	0	0	0.0122371
10283	4826.38	2	0	1	0	0	0	0.0122869
10285	4826.42	2	0	1	0	0	0	0.0122327
10287	4826.45	2	0	1	0	0	0	0.0122541
10289	4826.48	2	0	1	0	0	0	0.0122568
10291	4826.52	2	0	1	0	0	0	0.0122777
10293	4826.55	2	0	1	0	0	0	0.0122442
10295	4826.58	2	0	1	0	0	0	0.0122652
10297	4826.62	2	0	1	0	0	0	0.0122632
10299	4826.65	2	0	1	0	0	0	0.0122561
10301	4826.68	2	0	1	0	0	0	0.0122348
10303	4826.72	2	0	1	0	0	0	0.0121857
10305	4826.75	2	0	1	0	0	0	0.0122124
10307	4826.78	2	0	1	0	0	0	0.0122544
10309	4826.82	2	0	1	0	0	0	0.0122679
10311	4826.85	2	0	1	0	0	0	0.0122466
10313	4826.88	2	0	1	0	0	0	0.0122737
10315	4826.92	2	0	1	0	0	0	0.0122425
10317	4826.95	2	0	1	0	0	0	0.0122324
10319	4826.98	2	0	1	0	0	0	0.0122459
10321	4827.02	2	0	1	0	0	0	0.01227
10323	4827.05	2	0	1	0	0	0	0.0123102
10325	4827.08	2	0	1	0	0	0	0.0122801
10327	4827.12	2	0	1	0	0	0	0.0123038
10329	4827.15	2	0	1	0	0	0	0.0123136
10331	4827.18	2	0	1	0	0	0	0.0123167
10333	4827.22	2	0	1	0	0	0	0.012317
10335	4827.25	2	0	1	0	0	0	0.0123163
10337	4827.28	2	0	1	0	0	0	0.0123221
10339	4827.32	2	0	1	0	0	0	0.012337
10341	4827.35	2	0	1	0	0	0	0.0123248
10343	4827.38	2	0	1	0	0	0	0.0123123
10345	4827.42	2	0	1	0	0	0	0.012318
10347	4827.45	2	0	1	0	0	0	0.0122588
10349	4827.48	2	0	1	0	0	0	0.0123045
10351	4827.52	2	0	1	0	0	0	0.0123194
10353	4827.55	2	0	1	0	0	0	0.0123343
10355	4827.58	2	0	1	0	0	0	0.0123092
10357	4827.62	2	0	1	0	0	0	0.0123285
10359	4827.65	2	0	1	0	0	0	0.0123789
10361	4827.68	2	0	1	0	0	0	0.0123123
10363	4827.72	2	0	1	0	0	0	0.0123055
10365	4827.75	2	0	1	0	0	0	0.0122893
10367	4827.78	2	0	1	0	0	0	0.0122801
10369	4827.82	2	0	1	0	0	0	0.0123261
10371	4827.85	2	0	1	0	0	0	0.0122673
10373	4827.88	2	0	1	0	0	0	0.0122598
10375	4827.92	2	0	1	0	0	0	0.0122625
10377	4827.95	2	0	1	0	0	0	0.0122899
10379	4827.98	2	0	1	0	0	0	0.0122625
10381	4828.02	2	0	1	0	0	0	0.0122453
10383	4828.05	2	0	1	0	0	0	0.0122409
10385	4828.08	2	0	1	0	0	0	0.0122842
10387	4828.12	2	0	1	0	0	0	0.0122331
10389	4828.15	2	0	1	0	0	0	0.0122398
10391	4828.18	2	0	1	0	0	0	0.0122507
10393	4828.22	2	0	1	0	0	0	0.0122304
10395	4828.25	2	0	1	0	0	0	0.012248
10397	4828.28	2	0	1	0	0	0	0.012271
10399	4828.32	2	0	1	0	0	0	0.0122595
10401	4828.35	2	0	1	0	0	0	0.0123569
10403	4828.38	2	0	1	0	0	0	0.0123302
10405	4828.42	2	0	1	0	0	0	0.0123414
10407	4828.45	2	0	1	0	0	0	0.0123356
10409	4828.48	2	0	1	0	0	0	0.0123055
10411	4828.52	2	0	1	0	0	0	0.01236
10413	4828.55	2	0	1	0	0	0	0.0123708
10415	4828.58	2	0	1	0	0	0	0.0123982
10417	4828.62	2	0	1	0	0	0	0.0123244
10419	4828.65	2	0	1	0	0	0	0.0123092
10421	4828.68	2	0	1	0	0	0	0.0123559
10423	4828.72	2	0	1	0	0	0	0.0123397
10425	4828.75	2	0	1	0	0	0	0.012339
10427	4828.78	2	0	1	0	0	0	0.0123292
10429	4828.82	2	0	1	0	0	0	0.012315
10431	4828.85	2	0	1	0	0	0	0.0123004
10433	4828.88	2	0	1	0	0	0	0.0123024
10435	4828.92	2	0	1	0	0	0	0.0123041
10437	4828.95	2	0	1	0	0	0	0.0122761
10439	4828.98	2	0	1	0	0	0	0.0123024
10441	4829.02	2	0	1	0	0	0	0.0123119
10443	4829.05	2	0	1	0	0	0	0.0122899
10445	4829.08	2	0	1	0	0	0	0.0122869
10447	4829.12	2	0	1	0	0	0	0.0122909
10449	4829.15	2	0	1	0	0	0	0.0123021
10451	4829.18	2	0	1	0	0	0	0.0123089
10453	4829.22	2	0	1	0	0	0	0.0123214
10455	4829.25	2	0	1	0	0	0	0.0122645
10457	4829.28	2	0	1	0	0	0	0.0123265
10459	4829.32	2	0	1	0	0	0	0.0123728
10461	4829.35	2	0	1	0	0	0	0.0123427
10463	4829.38	2	0	1	0	0	0	0.0123654
10465	4829.42	2	0	1	0	0	0	0.0123691
10467	4829.45	2	0	1	0	0	0	0.0123549
10469	4829.48	2	0	1	0	0	0	0.0123404
10471	4829.52	2	0	1	0	0	0	0.01232
10473	4829.55	2	0	1	0	0	0	0.012297
10475	4829.58	2	0	1	0	0	0	0.0122761
10477	4829.62	2	0	1	0	0	0	0.0123106
10479	4829.65	2	0	1	0	0	0	0.0123082
10481	4829.68	2	0	1	0	0	0	0.0123041
10483	4829.72	2	0	1	0	0	0	0.0122821
10485	4829.75	2	0	1	0	0	0	0.0122845
10487	4829.78	2	0	1	0	0	0	0.012273
10489	4829.82	2	0	1	0	0	0	0.0123173
10491	4829.85	2	0	1	0	0	0	0.0123068
10493	4829.88	2	0	1	0	0	0	0.0123011
10495	4829.92	2	0	1	0	0	0	0.0123038
10497	4829.95	2	0	1	0	0	0	0.0122916
10499	4829.98	2	0	1	0	0	0	0.0123231
10501	4830.02	2	0	1	0	0	0	0.0122842
10503	4830.05	2	0	1	0	0	0	0.0122737
10505	4830.08	2	0	1	0	0	0	0.0123079
10507	4830.12	2	0	1	0	0	0	0.0123309
10509	4830.15	2	0	1	0	0	0	0.0122876
10511	4830.18	2	0	1	0	0	0	0.0122767
10513	4830.22	2	0	1	0	0	0	0.0123126
10515	4830.25	2	0	1	0	0	0	0.0123248
10517	4830.28	2	0	1	0	0	0	0.0122429
10519	4830.32	2	0	1	0	0	0	0.012294
10521	4830.35	2	0	1	0	0	0	0.0122855
10523	4830.38	2	0	1	0	0	0	0.0123332
10525	4830.42	2	0	1	0	0	0	0.0123112
10527	4830.45	2	0	1	0	0	0	0.0123546
10529	4830.48	2	0	1	0	0	0	0.0123471
10531	4830.52	2	0	1	0	0	0	0.0123444
10533	4830.55	2	0	1	0	0	0	0.0123789
10535	4830.58	2	0	1	0	0	0	0.0123705
10537	4830.62	2	0	1	0	0	0	0.0123671
10539	4830.65	2	0	1	0	0	0	0.0123705
10541	4830.68	2	0	1	0	0	0	0.0123485
10543	4830.72	2	0	1	0	0	0	0.0123972
10545	4830.75	2	0	1	0	0	0	0.0123982
10547	4830.78	2	0	1	0	0	0	0.0124009
10549	4830.82	2	0	1	0	0	0	0.0123776
10551	4830.85	2	0	1	0	0	0	0.0123999
10553	4830.88	2	0	1	0	0	0	0.0123982
10555	4830.92	2	0	1	0	0	0	0.0124162
10557	4830.95	2	0	1	0	0	0	0.01243
10559	4830.98	2	0	1	0	0	0	0.0123871
10561	4831.02	2	0	1	0	0	0	0.012384
10563	4831.05	2	0	1	0	0	0	0.0124101
10565	4831.08	2	0	1	0	0	0	0.0123942
10567	4831.12	2	0	1	0	0	0	0.0123728
10569	4831.15	2	0	1	0	0	0	0.0123969
10571	4831.18	2	0	1	0	0	0	0.0123962
10573	4831.22	2	0	1	0	0	0	0.0124043
10575	4831.25	2	0	1	0	0	0	0.0123536
10577	4831.28	2	0	1	0	0	0	0.0123451
10579	4831.32	2	0	1	0	0	0	0.0123637
10581	4831.35	2	0	1	0	0	0	0.0124121
10583	4831.38	2	0	1	0	0	0	0.0123776
10585	4831.42	2	0	1	0	0	0	0.0123776
10587	4831.45	2	0	1	0	0	0	0.0123393
10589	4831.48	2	0	1	0	0	0	0.0123833
10591	4831.52	2	0	1	0	0	0	0.0123918
10593	4831.55	2	0	1	0	0	0	0.0123779
10595	4831.58	2	0	1	0	0	0	0.0123938
10597	4831.62	2	0	1	0	0	0	0.012381
10599	4831.65	2	0	1	0	0	0	0.0123857
10601	4831.68	2	0	1	0	0	0	0.0124432
10603	4831.72	2	0	1	0	0	0	0.0124382
10605	4831.75	2	0	1	0	0	0	0.0124006
10607	4831.78	2	0	1	0	0	0	0.0123783
10609	4831.82	2	0	1	0	0	0	0.0123881
10611	4831.85	2	0	1	0	0	0	0.0124016
10613	4831.88	2	0	1	0	0	0	0.0123749
10615	4831.92	2	0	1	0	0	0	0.0124283
10617	4831.95	2	0	1	0	0	0	0.012385
10619	4831.98	2	0	1	0	0	0	0.0124175
10621	4832.02	2	0	1	0	0	0	0.0123681
10623	4832.05	2	0	1	0	0	0	0.0123799
10625	4832.08	2	0	1	0	0	0	0.0123789
10627	4832.12	2	0	1	0	0	0	0.0123864
10629	4832.15	2	0	1	0	0	0	0.0123864
10631	4832.18	2	0	1	0	0	0	0.0124182
10633	4832.22	2	0	1	0	0	0	0.0124067
10635	4832.25	2	0	1	0	0	0	0.0123813
10637	4832.28	2	0	1	0	0	0	0.0123417
10639	4832.32	2	0	1	0	0	0	0.0124016
10641	4832.35	2	0	1	0	0	0	0.0123749
10643	4832.38	2	0	1	0	0	0	0.0124111
10645	4832.42	2	0	1	0	0	0	0.0124043
10647	4832.45	2	0	1	0	0	0	0.0124182
10649	4832.48	2	0	1	0	0	0	0.0124239
10651	4832.52	2	0	1	0	0	0	0.0124199
10653	4832.55	2	0	1	0	0	0	0.0124558
10655	4832.58	2	0	1	0	0	0	0.0124449
10657	4832.62	2	0	1	0	0	0	0.0124436
10659	4832.65	2	0	1	0	0	0	0.0124172
10661	4832.68	2	0	1	0	0	0	0.0124057
10663	4832.72	2	0	1	0	0	0	0.0123996
10665	4832.75	2	0	1	0	0	0	0.0124118
10667	4832.78	2	0	1	0	0	0	0.0124222
10669	4832.82	2	0	1	0	0	0	0.0124036
10671	4832.85	2	0	1	0	0	0	0.0123651
10673	4832.88	2	0	1	0	0	0	0.0123603
10675	4832.92	2	0	1	0	0	0	0.0123674
10677	4832.95	2	0	1	0	0	0	0.012336
10679	4832.98	2	0	1	0	0	0	0.0123664
10681	4833.02	2	0	1	0	0	0	0.0123962
10683	4833.05	2	0	1	0	0	0	0.0123772
10685	4833.08	2	0	1	0	0	0	0.0123488
10687	4833.12	2	0	1	0	0	0	0.0123576
10689	4833.15	2	0	1	0	0	0	0.012385
10691	4833.18	2	0	1	0	0	0	0.0124091
10693	4833.22	2	0	1	0	0	0	0.0123877
10695	4833.25	2	0	1	0	0	0	0.0123982
10697	4833.28	2	0	1	0	0	0	0.0123965
10699	4833.32	2	0	1	0	0	0	0.0123569
10701	4833.35	2	0	1	0	0	0	0.0123739
10703	4833.38	2	0	1	0	0	0	0.0124233
10705	4833.42	2	0	1	0	0	0	0.0123786
10707	4833.45	2	0	1	0	0	0	0.0124043
10709	4833.48	2	0	1	0	0	0	0.0124026
10711	4833.52	2	0	1	0	0	0	0.012364
10713	4833.55	2	0	1	0	0	0	0.0123803
10715	4833.58	2	0	1	0	0	0	0.0123931
10717	4833.62	2	0	1	0	0	0	0.0123833
10719	4833.65	2	0	1	0	0	0	0.012381
10721	4833.68	2	0	1	0	0	0	0.0123556
10723	4833.72	2	0	1	0	0	0	0.0123261
10725	4833.75	2	0	1	0	0	0	0.0123837
10727	4833.78	2	0	1	0	0	0	0.0123945
10729	4833.82	2	0	1	0	0	0	0.0124006
10731	4833.85	2	0	1	0	0	0	0.0123593
10733	4833.88	2	0	1	0	0	0	0.0123681
10735	4833.92	2	0	1	0	0	0	0.0123515
10737	4833.95	2	0	1	0	0	0	0.0123221
10739	4833.98	2	0	1	0	0	0	0.0123231
10741	4834.02	2	0	1	0	0	0	0.0123637
10743	4834.05	2	0	1	0	0	0	0.0123272
10745	4834.08	2	0	1	0	0	0	0.0123583
10747	4834.12	2	0	1	0	0	0	0.0123708
10749	4834.15	2	0	1	0	0	0	0.0123688
10751	4834.18	2	0	1	0	0	0	0.0123515
10753	4834.22	2	0	1	0	0	0	0.0123644
10755	4834.25	2	0	1	0	0	0	0.0123627
10757	4834.28	2	0	1	0	0	0	0.012382
10759	4834.32	2	0	1	0	0	0	0.0123796
10761	4834.35	2	0	1	0	0	0	0.012339
10763	4834.38	2	0	1	0	0	0	0.01236
10765	4834.42	2	0	1	0	0	0	0.0123918
10767	4834.45	2	0	1	0	0	0	0.0123197
10769	4834.48	2	0	1	0	0	0	0.0123468
10771	4834.52	2	0	1	0	0	0	0.0123278
10773	4834.55	2	0	1	0	0	0	0.0123444
10775	4834.58	2	0	1	0	0	0	0.0123295
10777	4834.62	2	0	1	0	0	0	0.0122923
10779	4834.65	2	0	1	0	0	0	0.0123343
10781	4834.68	2	0	1	0	0	0	0.0123136
10783	4834.72	2	0	1	0	0	0	0.012297
10785	4834.75	2	0	1	0	0	0	0.0123698
10787	4834.78	2	0	1	0	0	0	0.0122808
10789	4834.82	2	0	1	0	0	0	0.0122906
10791	4834.85	2	0	1	0	0	0	0.0123278
10793	4834.88	2	0	1	0	0	0	0.0123363
10795	4834.92	2	0	1	0	0	0	0.012317
10797	4834.95	2	0	1	0	0	0	0.0123224
10799	4834.98	2	0	1	0	0	0	0.0123041
10801	4835.02	2	0	1	0	0	0	0.0122527
10803	4835.05	2	0	1	0	0	0	0.012274
10805	4835.08	2	0	1	0	0	0	0.0123356
10807	4835.12	2	0	1	0	0	0	0.0122693
10809	4835.15	2	0	1	0	0	0	0.0122761
10811	4835.18	2	0	1	0	0	0	0.0122947
10813	4835.22	2	0	1	0	0	0	0.0122419
10815	4835.25	2	0	1	0	0	0	0.0122947
10817	4835.28	2	0	1	0	0	0	0.0122889
10819	4835.32	2	0	1	0	0	0	0.0122706
10821	4835.35	2	0	1	0	0	0	0.0122513
10823	4835.38	2	0	1	0	0	0	0.0122869
10825	4835.42	2	0	1	0	0	0	0.0123092
10827	4835.45	2	0	1	0	0	0	0.0123332
10829	4835.48	2	0	1	0	0	0	0.0122852
10831	4835.52	2	0	1	0	0	0	0.0123522
10833	4835.55	2	0	1	0	0	0	0.0123184
10835	4835.58	2	0	1	0	0	0	0.0123062
10837	4835.62	2	0	1	0	0	0	0.012271
10839	4835.65	2	0	1	0	0	0	0.0122757
10841	4835.68	2	0	1	0	0	0	0.0122669
10843	4835.72	2	0	1	0	0	0	0.0122777
10845	4835.75	2	0	1	0	0	0	0.0123217
10847	4835.78	2	0	1	0	0	0	0.0122754
10849	4835.82	2	0	1	0	0	0	0.0122987
10851	4835.85	2	0	1	0	0	0	0.0122872
10853	4835.88	2	0	1	0	0	0	0.0123177
10855	4835.92	2	0	1	0	0	0	0.0123241
10857	4835.95	2	0	1	0	0	0	0.012315
10859	4835.98	2	0	1	0	0	0	0.0123231
10861	4836.02	2	0	1	0	0	0	0.0122601
10863	4836.05	2	0	1	0	0	0	0.0123062
10865	4836.08	2	0	1	0	0	0	0.0122909
10867	4836.12	2	0	1	0	0	0	0.0122794
10869	4836.15	2	0	1	0	0	0	0.0122994
10871	4836.18	2	0	1	0	0	0	0.0122862
10873	4836.21	2	0	1	0	0	0	0.012252
10875	4836.25	2	0	1	0	0	0	0.0122618
10877	4836.28	2	0	1	0	0	0	0.0122967
10879	4836.31	2	0	1	0	0	0	0.0123099
10881	4836.35	2	0	1	0	0	0	0.01223
10883	4836.38	2	0	1	0	0	0	0.0122507
10885	4836.41	2	0	1	0	0	0	0.0123109
10887	4836.45	2	0	1	0	0	0	0.0122933
10889	4836.48	2	0	1	0	0	0	0.0122828
10891	4836.51	2	0	1	0	0	0	0.0123272
10893	4836.55	2	0	1	0	0	0	0.0122747
10895	4836.58	2	0	1	0	0	0	0.01227
10897	4836.61	2	0	1	0	0	0	0.0123251
10899	4836.65	2	0	1	0	0	0	0.0122808
10901	4836.68	2	0	1	0	0	0	0.0122899
10903	4836.71	2	0	1	0	0	0	0.0123221
10905	4836.75	2	0	1	0	0	0	0.0122859
10907	4836.78	2	0	1	0	0	0	0.012297
10909	4836.81	2	0	1	0	0	0	0.0122886
10911	4836.85	2	0	1	0	0	0	0.0122997
10913	4836.88	2	0	1	0	0	0	0.0122947
10915	4836.91	2	0	1	0	0	0	0.0123048
10917	4836.95	2	0	1	0	0	0	0.012316
10919	4836.98	2	0	1	0	0	0	0.0123035
10921	4837.01	2	0	1	0	0	0	0.0123319
10923	4837.05	2	0	1	0	0	0	0.0122788
10925	4837.08	2	0	1	0	0	0	0.012314
10927	4837.11	2	0	1	0	0	0	0.0123363
10929	4837.15	2	0	1	0	0	0	0.012292
10931	4837.18	2	0	1	0	0	0	0.0123272
10933	4837.21	2	0	1	0	0	0	0.0123759
10935	4837.25	2	0	1	0	0	0	0.0123448
10937	4837.28	2	0	1	0	0	0	0.012338
10939	4837.31	2	0	1	0	0	0	0.0123576
10941	4837.35	2	0	1	0	0	0	0.0123028
10943	4837.38	2	0	1	0	0	0	0.0123478
10945	4837.41	2	0	1	0	0	0	0.0123248
10947	4837.45	2	0	1	0	0	0	0.0123265
10949	4837.48	2	0	1	0	0	0	0.0123082
10951	4837.51	2	0	1	0	0	0	0.0123052
10953	4837.55	2	0	1	0	0	0	0.0123173
10955	4837.58	2	0	1	0	0	0	0.0123234
10957	4837.61	2	0	1	0	0	0	0.0123163
10959	4837.65	2	0	1	0	0	0	0.0123153
10961	4837.68	2	0	1	0	0	0	0.0123373
10963	4837.71	2	0	1	0	0	0	0.0122953
10965	4837.75	2	0	1	0	0	0	0.0122947
10967	4837.78	2	0	1	0	0	0	0.0122757
10969	4837.81	2	0	1	0	0	0	0.0122794
10971	4837.85	2	0	1	0	0	0	0.0123285
10973	4837.88	2	0	1	0	0	0	0.0123038
10975	4837.91	2	0	1	0	0	0	0.0122808
10977	4837.95	2	0	1	0	0	0	0.0123156
10979	4837.98	2	0	1	0	0	0	0.0122632
10981	4838.01	2	0	1	0	0	0	0.0123383
10983	4838.05	2	0	1	0	0	0	0.0122997
10985	4838.08	2	0	1	0	0	0	0.0123272
10987	4838.11	2	0	1	0	0	0	0.012381
10989	4838.15	2	0	1	0	0	0	0.0123397
10991	4838.18	2	0	1	0	0	0	0.0123512
10993	4838.21	2	0	1	0	0	0	0.0123539
10995	4838.25	2	0	1	0	0	0	0.0123258
10997	4838.28	2	0	1	0	0	0	0.0123177
10999	4838.31	2	0	1	0	0	0	0.012295
11001	4838.35	2	0	1	0	0	0	0.0122805
11003	4838.38	2	0	1	0	0	0	0.0123542
11005	4838.41	2	0	1	0	0	0	0.0123458
11007	4838.45	2	0	1	0	0	0	0.0123444
11009	4838.48	2	0	1	0	0	0	0.0123373
11011	4838.51	2	0	1	0	0	0	0.0122886
11013	4838.55	2	0	1	0	0	0	0.0123004
11015	4838.58	2	0	1	0	0	0	0.0123255
11017	4838.61	2	0	1	0	0	0	0.0122896
11019	4838.65	2	0	1	0	0	0	0.0123258
11021	4838.68	2	0	1	0	0	0	0.0123028
11023	4838.71	2	0	1	0	0	0	0.0123282
11025	4838.75	2	0	1	0	0	0	0.0123576
11027	4838.78	2	0	1	0	0	0	0.0123123
11029	4838.81	2	0	1	0	0	0	0.0123475
11031	4838.85	2	0	1	0	0	0	0.0123434
11033	4838.88	2	0	1	0	0	0	0.012384
11035	4838.91	2	0	1	0	0	0	0.0123173
11037	4838.95	2	0	1	0	0	0	0.012318
11039	4838.98	2	0	1	0	0	0	0.0123177
11041	4839.01	2	0	1	0	0	0	0.0122811
11043	4839.05	2	0	1	0	0	0	0.0123248
11045	4839.08	2	0	1	0	0	0	0.0123295
11047	4839.11	2	0	1	0	0	0	0.0122767
11049	4839.15	2	0	1	0	0	0	0.0123373
11051	4839.18	2	0	1	0	0	0	0.0122818
11053	4839.21	2	0	1	0	0	0	0.0122801
11055	4839.25	2	0	1	0	0	0	0.0122909
11057	4839.28	2	0	1	0	0	0	0.0122622
11059	4839.31	2	0	1	0	0	0	0.0122994
11061	4839.35	2	0	1	0	0	0	0.012275
11063	4839.38	2	0	1	0	0	0	0.0122689
11065	4839.41	2	0	1	0	0	0	0.0122842
11067	4839.45	2	0	1	0	0	0	0.0122808
11069	4839.48	2	0	1	0	0	0	0.0123211
11071	4839.51	2	0	1	0	0	0	0.0123197
11073	4839.55	2	0	1	0	0	0	0.0123515
11075	4839.58	2	0	1	0	0	0	0.0123173
11077	4839.61	2	0	1	0	0	0	0.0123397
11079	4839.65	2	0	1	0	0	0	0.0123234
11081	4839.68	2	0	1	0	0	0	0.0123018
11083	4839.71	2	0	1	0	0	0	0.0123539
11085	4839.75	2	0	1	0	0	0	0.012317
11087	4839.78	2	0	1	0	0	0	0.0123339
11089	4839.81	2	0	1	0	0	0	0.0123272
11091	4839.85	2	0	1	0	0	0	0.0123082
11093	4839.88	2	0	1	0	0	0	0.0123823
11095	4839.91	2	0	1	0	0	0	0.0123441
11097	4839.95	2	0	1	0	0	0	0.0123011
11099	4839.98	2	0	1	0	0	0	0.0123099
11101	4840.01	2	0	1	0	0	0	0.0123288
11103	4840.05	2	0	1	0	0	0	0.0122953
[truncated: 34,165 more rows]

## Sheet: Mouse 2_Event Trials
5079.838592	Down	25491	42279590.5408	11:44:39.5905408

## Sheet: Mouse 3_415 Signal
FrameCounter	Timestamp	LedState	Stimulation	Output0	Output1	Input0	Input1	Region0G
7124	697.417	1	0	1	0	0	0	0.0112828
7126	697.45	1	0	1	0	0	0	0.0112574
7128	697.484	1	0	1	0	0	0	0.0112666
7130	697.517	1	0	1	0	0	0	0.0112615
7132	697.55	1	0	1	0	0	0	0.0112601
7134	697.584	1	0	1	0	0	0	0.0112953
7136	697.617	1	0	1	0	0	0	0.0112902
7138	697.65	1	0	1	0	0	0	0.0112662
7140	697.684	1	0	1	0	0	0	0.0112351
7142	697.717	1	0	1	0	0	0	0.0112798
7144	697.75	1	0	1	0	0	0	0.0113045
7146	697.784	1	0	1	0	0	0	0.0112733
7148	697.817	1	0	1	0	0	0	0.0112503
7150	697.85	1	0	1	0	0	0	0.0112764
7152	697.884	1	0	1	0	0	0	0.0112632
7154	697.917	1	0	1	0	0	0	0.0112544
7156	697.95	1	0	1	0	0	0	0.0112872
7158	697.984	1	0	1	0	0	0	0.0112662
7160	698.017	1	0	1	0	0	0	0.0113122
7162	698.05	1	0	1	0	0	0	0.0113129
7164	698.084	1	0	1	0	0	0	0.011274
7166	698.117	1	0	1	0	0	0	0.0113119
7168	698.15	1	0	1	0	0	0	0.0112666
7170	698.184	1	0	1	0	0	0	0.0112767
7172	698.217	1	0	1	0	0	0	0.011275
7174	698.25	1	0	1	0	0	0	0.0112564
7176	698.284	1	0	1	0	0	0	0.0112446
7178	698.317	1	0	1	0	0	0	0.0112517
7180	698.35	1	0	1	0	0	0	0.0111992
7182	698.384	1	0	1	0	0	0	0.0112131
7184	698.417	1	0	1	0	0	0	0.0111755
7186	698.45	1	0	1	0	0	0	0.01121
7188	698.484	1	0	1	0	0	0	0.0111627
7190	698.517	1	0	1	0	0	0	0.0111928
7192	698.55	1	0	1	0	0	0	0.0111823
7194	698.584	1	0	1	0	0	0	0.0112134
7196	698.617	1	0	1	0	0	0	0.0111522
7198	698.65	1	0	1	0	0	0	0.0111796
7200	698.684	1	0	1	0	0	0	0.011141
7202	698.717	1	0	1	0	0	0	0.0111515
7204	698.75	1	0	1	0	0	0	0.0111904
7206	698.784	1	0	1	0	0	0	0.0111583
7208	698.817	1	0	1	0	0	0	0.011185
7210	698.85	1	0	1	0	0	0	0.0111586
7212	698.884	1	0	1	0	0	0	0.0111782
7214	698.917	1	0	1	0	0	0	0.0111589
7216	698.95	1	0	1	0	0	0	0.0111952
7218	698.984	1	0	1	0	0	0	0.0111464
7220	699.017	1	0	1	0	0	0	0.011163
7222	699.05	1	0	1	0	0	0	0.0112131
7224	699.084	1	0	1	0	0	0	0.0111924
7226	699.117	1	0	1	0	0	0	0.0111938
7228	699.15	1	0	1	0	0	0	0.0111451
7230	699.184	1	0	1	0	0	0	0.0111667
7232	699.217	1	0	1	0	0	0	0.0111647
7234	699.25	1	0	1	0	0	0	0.0111694
7236	699.284	1	0	1	0	0	0	0.0111941
7238	699.317	1	0	1	0	0	0	0.0111968
7240	699.35	1	0	1	0	0	0	0.0112195
7242	699.384	1	0	1	0	0	0	0.0111975
7244	699.417	1	0	1	0	0	0	0.0111772
7246	699.45	1	0	1	0	0	0	0.0112127
7248	699.484	1	0	1	0	0	0	0.0111718
7250	699.517	1	0	1	0	0	0	0.011186
7252	699.55	1	0	1	0	0	0	0.011188
7254	699.584	1	0	1	0	0	0	0.01125
7256	699.617	1	0	1	0	0	0	0.0111931
7258	699.65	1	0	1	0	0	0	0.0111566
7260	699.684	1	0	1	0	0	0	0.0111836
7262	699.717	1	0	1	0	0	0	0.0112144
7264	699.75	1	0	1	0	0	0	0.0111891
7266	699.784	1	0	1	0	0	0	0.01121
7268	699.817	1	0	1	0	0	0	0.0112391
7270	699.85	1	0	1	0	0	0	0.0111742
7272	699.884	1	0	1	0	0	0	0.0112161
7274	699.917	1	0	1	0	0	0	0.0112743
7276	699.95	1	0	1	0	0	0	0.0112036
7278	699.984	1	0	1	0	0	0	0.0112023
7280	700.017	1	0	1	0	0	0	0.0112161
7282	700.05	1	0	1	0	0	0	0.0111512
7284	700.084	1	0	1	0	0	0	0.0111958
7286	700.117	1	0	1	0	0	0	0.0112175
7288	700.15	1	0	1	0	0	0	0.0112293
7290	700.184	1	0	1	0	0	0	0.0111725
7292	700.217	1	0	1	0	0	0	0.0112043
7294	700.25	1	0	1	0	0	0	0.0112043
7296	700.284	1	0	1	0	0	0	0.0112104
7298	700.317	1	0	1	0	0	0	0.0111542
7300	700.35	1	0	1	0	0	0	0.0112077
7302	700.384	1	0	1	0	0	0	0.0112178
7304	700.417	1	0	1	0	0	0	0.011206
7306	700.45	1	0	1	0	0	0	0.0111755
7308	700.484	1	0	1	0	0	0	0.0111826
7310	700.517	1	0	1	0	0	0	0.0112002
7312	700.55	1	0	1	0	0	0	0.0111708
7314	700.584	1	0	1	0	0	0	0.0111874
7316	700.617	1	0	1	0	0	0	0.0111921
7318	700.65	1	0	1	0	0	0	0.0111759
7320	700.684	1	0	1	0	0	0	0.0111512
7322	700.717	1	0	1	0	0	0	0.0111694
7324	700.75	1	0	1	0	0	0	0.0112073
7326	700.784	1	0	1	0	0	0	0.0111542
7328	700.817	1	0	1	0	0	0	0.011161
7330	700.85	1	0	1	0	0	0	0.0111843
7332	700.884	1	0	1	0	0	0	0.011161
7334	700.917	1	0	1	0	0	0	0.0111772
7336	700.95	1	0	1	0	0	0	0.0111437
7338	700.984	1	0	1	0	0	0	0.0111525
7340	701.017	1	0	1	0	0	0	0.0112009
7342	701.05	1	0	1	0	0	0	0.0111931
7344	701.084	1	0	1	0	0	0	0.0111867
7346	701.117	1	0	1	0	0	0	0.0112131
7348	701.15	1	0	1	0	0	0	0.0112199
7350	701.184	1	0	1	0	0	0	0.0112432
7352	701.217	1	0	1	0	0	0	0.0111725
7354	701.25	1	0	1	0	0	0	0.0112534
7356	701.284	1	0	1	0	0	0	0.0112067
7358	701.317	1	0	1	0	0	0	0.0111935
7360	701.35	1	0	1	0	0	0	0.0111806
7362	701.384	1	0	1	0	0	0	0.0111857
7364	701.417	1	0	1	0	0	0	0.0112371
7366	701.45	1	0	1	0	0	0	0.0112046
7368	701.484	1	0	1	0	0	0	0.0112036
7370	701.517	1	0	1	0	0	0	0.0112043
7372	701.55	1	0	1	0	0	0	0.0112192
7374	701.584	1	0	1	0	0	0	0.0111816
7376	701.617	1	0	1	0	0	0	0.0111948
7378	701.65	1	0	1	0	0	0	0.0111688
7380	701.684	1	0	1	0	0	0	0.0111545
7382	701.717	1	0	1	0	0	0	0.0111772
7384	701.75	1	0	1	0	0	0	0.011163
7386	701.784	1	0	1	0	0	0	0.0111295
7388	701.817	1	0	1	0	0	0	0.0112134
7390	701.85	1	0	1	0	0	0	0.0111457
7392	701.884	1	0	1	0	0	0	0.0111583
7394	701.917	1	0	1	0	0	0	0.0111393
7396	701.95	1	0	1	0	0	0	0.0111261
7398	701.984	1	0	1	0	0	0	0.0111474
7400	702.017	1	0	1	0	0	0	0.0111461
7402	702.05	1	0	1	0	0	0	0.0111522
7404	702.084	1	0	1	0	0	0	0.0111664
7406	702.117	1	0	1	0	0	0	0.0111329
7408	702.15	1	0	1	0	0	0	0.0110943
7410	702.184	1	0	1	0	0	0	0.011141
7412	702.217	1	0	1	0	0	0	0.0111227
7414	702.25	1	0	1	0	0	0	0.0111207
7416	702.284	1	0	1	0	0	0	0.0111386
7418	702.317	1	0	1	0	0	0	0.0111403
7420	702.35	1	0	1	0	0	0	0.0111461
7422	702.384	1	0	1	0	0	0	0.0111001
7424	702.417	1	0	1	0	0	0	0.011187
7426	702.45	1	0	1	0	0	0	0.0111674
7428	702.484	1	0	1	0	0	0	0.0111484
7430	702.517	1	0	1	0	0	0	0.0111904
7432	702.55	1	0	1	0	0	0	0.0111813
7434	702.584	1	0	1	0	0	0	0.011162
7436	702.617	1	0	1	0	0	0	0.0111606
7438	702.65	1	0	1	0	0	0	0.0111904
7440	702.684	1	0	1	0	0	0	0.0111765
7442	702.717	1	0	1	0	0	0	0.0112185
7444	702.75	1	0	1	0	0	0	0.0112334
7446	702.784	1	0	1	0	0	0	0.0112219
7448	702.817	1	0	1	0	0	0	0.0112523
7450	702.85	1	0	1	0	0	0	0.0112419
7452	702.884	1	0	1	0	0	0	0.0112483
7454	702.917	1	0	1	0	0	0	0.0112239
7456	702.95	1	0	1	0	0	0	0.0112375
7458	702.984	1	0	1	0	0	0	0.011254
7460	703.017	1	0	1	0	0	0	0.0112429
7462	703.05	1	0	1	0	0	0	0.0112202
7464	703.084	1	0	1	0	0	0	0.0112886
7466	703.117	1	0	1	0	0	0	0.0112452
7468	703.15	1	0	1	0	0	0	0.0112388
7470	703.184	1	0	1	0	0	0	0.0112564
7472	703.217	1	0	1	0	0	0	0.0112601
7474	703.25	1	0	1	0	0	0	0.0112618
7476	703.284	1	0	1	0	0	0	0.0112554
7478	703.317	1	0	1	0	0	0	0.011232
7480	703.35	1	0	1	0	0	0	0.0112435
7482	703.384	1	0	1	0	0	0	0.011251
7484	703.417	1	0	1	0	0	0	0.0112347
7486	703.45	1	0	1	0	0	0	0.0112195
7488	703.484	1	0	1	0	0	0	0.0112886
7490	703.517	1	0	1	0	0	0	0.0112439
7492	703.55	1	0	1	0	0	0	0.0112571
7494	703.584	1	0	1	0	0	0	0.011254
7496	703.617	1	0	1	0	0	0	0.0112503
7498	703.65	1	0	1	0	0	0	0.0112452
7500	703.684	1	0	1	0	0	0	0.0112848
7502	703.717	1	0	1	0	0	0	0.0112852
7504	703.75	1	0	1	0	0	0	0.0112513
7506	703.784	1	0	1	0	0	0	0.011274
7508	703.817	1	0	1	0	0	0	0.0112564
7510	703.85	1	0	1	0	0	0	0.0112801
7512	703.884	1	0	1	0	0	0	0.0112713
7514	703.917	1	0	1	0	0	0	0.0112456
7516	703.95	1	0	1	0	0	0	0.011295
7518	703.984	1	0	1	0	0	0	0.011249
7520	704.017	1	0	1	0	0	0	0.0112659
7522	704.05	1	0	1	0	0	0	0.0112726
7524	704.084	1	0	1	0	0	0	0.0113001
7526	704.117	1	0	1	0	0	0	0.0112578
7528	704.15	1	0	1	0	0	0	0.0113024
7530	704.184	1	0	1	0	0	0	0.0112987
7532	704.217	1	0	1	0	0	0	0.0113112
7534	704.25	1	0	1	0	0	0	0.0112693
7536	704.284	1	0	1	0	0	0	0.0113193
7538	704.317	1	0	1	0	0	0	0.0112574
7540	704.35	1	0	1	0	0	0	0.0113031
7542	704.384	1	0	1	0	0	0	0.0113078
7544	704.417	1	0	1	0	0	0	0.0112902
7546	704.45	1	0	1	0	0	0	0.0112987
7548	704.484	1	0	1	0	0	0	0.0113072
7550	704.517	1	0	1	0	0	0	0.0113224
7552	704.55	1	0	1	0	0	0	0.0113281
7554	704.584	1	0	1	0	0	0	0.011295
7556	704.617	1	0	1	0	0	0	0.0113129
7558	704.65	1	0	1	0	0	0	0.0113356
7560	704.684	1	0	1	0	0	0	0.0112743
7562	704.717	1	0	1	0	0	0	0.011338
7564	704.75	1	0	1	0	0	0	0.0113237
7566	704.784	1	0	1	0	0	0	0.0113329
7568	704.817	1	0	1	0	0	0	0.0113193
7570	704.85	1	0	1	0	0	0	0.0113278
7572	704.884	1	0	1	0	0	0	0.0113329
7574	704.917	1	0	1	0	0	0	0.0113116
7576	704.95	1	0	1	0	0	0	0.0113661
7578	704.984	1	0	1	0	0	0	0.0113068
7580	705.017	1	0	1	0	0	0	0.0113559
7582	705.05	1	0	1	0	0	0	0.0113187
7584	705.084	1	0	1	0	0	0	0.0113319
7586	705.117	1	0	1	0	0	0	0.0113515
7588	705.15	1	0	1	0	0	0	0.011315
7590	705.183	1	0	1	0	0	0	0.011343
7592	705.217	1	0	1	0	0	0	0.0112649
7594	705.25	1	0	1	0	0	0	0.0113133
7596	705.283	1	0	1	0	0	0	0.0113353
7598	705.317	1	0	1	0	0	0	0.0113268
7600	705.35	1	0	1	0	0	0	0.0113268
7602	705.383	1	0	1	0	0	0	0.0113139
7604	705.417	1	0	1	0	0	0	0.0112984
7606	705.45	1	0	1	0	0	0	0.0113278
7608	705.483	1	0	1	0	0	0	0.0112974
7610	705.517	1	0	1	0	0	0	0.011338
7612	705.55	1	0	1	0	0	0	0.0113312
7614	705.583	1	0	1	0	0	0	0.0113498
7616	705.617	1	0	1	0	0	0	0.0113441
7618	705.65	1	0	1	0	0	0	0.0113383
7620	705.683	1	0	1	0	0	0	0.0113129
7622	705.717	1	0	1	0	0	0	0.0112902
7624	705.75	1	0	1	0	0	0	0.0112879
7626	705.783	1	0	1	0	0	0	0.0112926
7628	705.817	1	0	1	0	0	0	0.0112909
7630	705.85	1	0	1	0	0	0	0.0113444
7632	705.883	1	0	1	0	0	0	0.0112726
7634	705.917	1	0	1	0	0	0	0.0112601
7636	705.95	1	0	1	0	0	0	0.0113139
7638	705.983	1	0	1	0	0	0	0.0112997
7640	706.017	1	0	1	0	0	0	0.0113146
7642	706.05	1	0	1	0	0	0	0.011315
7644	706.083	1	0	1	0	0	0	0.0112764
7646	706.117	1	0	1	0	0	0	0.011273
7648	706.15	1	0	1	0	0	0	0.0112865
7650	706.183	1	0	1	0	0	0	0.0113214
7652	706.217	1	0	1	0	0	0	0.0113447
7654	706.25	1	0	1	0	0	0	0.0112774
7656	706.283	1	0	1	0	0	0	0.0113163
7658	706.317	1	0	1	0	0	0	0.0113224
7660	706.35	1	0	1	0	0	0	0.0113346
7662	706.383	1	0	1	0	0	0	0.0112605
7664	706.417	1	0	1	0	0	0	0.0113173
7666	706.45	1	0	1	0	0	0	0.0113278
7668	706.483	1	0	1	0	0	0	0.0112862
7670	706.517	1	0	1	0	0	0	0.0113288
7672	706.55	1	0	1	0	0	0	0.0113325
7674	706.583	1	0	1	0	0	0	0.0112957
7676	706.617	1	0	1	0	0	0	0.0113062
7678	706.65	1	0	1	0	0	0	0.0112747
7680	706.683	1	0	1	0	0	0	0.0112628
7682	706.717	1	0	1	0	0	0	0.0112588
7684	706.75	1	0	1	0	0	0	0.0112875
7686	706.783	1	0	1	0	0	0	0.0112655
7688	706.817	1	0	1	0	0	0	0.011249
7690	706.85	1	0	1	0	0	0	0.0112754
7692	706.883	1	0	1	0	0	0	0.0112696
7694	706.917	1	0	1	0	0	0	0.0112564
7696	706.95	1	0	1	0	0	0	0.0112787
7698	706.983	1	0	1	0	0	0	0.0112212
7700	707.017	1	0	1	0	0	0	0.0112408
7702	707.05	1	0	1	0	0	0	0.0112567
7704	707.083	1	0	1	0	0	0	0.0112317
7706	707.117	1	0	1	0	0	0	0.0112046
7708	707.15	1	0	1	0	0	0	0.0112845
7710	707.183	1	0	1	0	0	0	0.0112686
7712	707.217	1	0	1	0	0	0	0.0112449
7714	707.25	1	0	1	0	0	0	0.0112469
7716	707.283	1	0	1	0	0	0	0.011296
7718	707.317	1	0	1	0	0	0	0.0112764
7720	707.35	1	0	1	0	0	0	0.0112557
7722	707.383	1	0	1	0	0	0	0.0112195
7724	707.417	1	0	1	0	0	0	0.0112622
7726	707.45	1	0	1	0	0	0	0.0112195
7728	707.483	1	0	1	0	0	0	0.011271
7730	707.517	1	0	1	0	0	0	0.0112635
7732	707.55	1	0	1	0	0	0	0.0112449
7734	707.583	1	0	1	0	0	0	0.0113048
7736	707.617	1	0	1	0	0	0	0.011274
7738	707.65	1	0	1	0	0	0	0.0112378
7740	707.683	1	0	1	0	0	0	0.011271
7742	707.717	1	0	1	0	0	0	0.0112608
7744	707.75	1	0	1	0	0	0	0.0112561
7746	707.783	1	0	1	0	0	0	0.0112808
7748	707.817	1	0	1	0	0	0	0.0113048
7750	707.85	1	0	1	0	0	0	0.0112699
7752	707.883	1	0	1	0	0	0	0.0112422
7754	707.917	1	0	1	0	0	0	0.0112534
7756	707.95	1	0	1	0	0	0	0.0112435
7758	707.983	1	0	1	0	0	0	0.011208
7760	708.017	1	0	1	0	0	0	0.0112381
7762	708.05	1	0	1	0	0	0	0.0112358
7764	708.083	1	0	1	0	0	0	0.0112527
7766	708.117	1	0	1	0	0	0	0.0112682
7768	708.15	1	0	1	0	0	0	0.0112632
7770	708.183	1	0	1	0	0	0	0.0113312
7772	708.217	1	0	1	0	0	0	0.0112402
7774	708.25	1	0	1	0	0	0	0.0112036
7776	708.283	1	0	1	0	0	0	0.0112293
7778	708.317	1	0	1	0	0	0	0.0112547
7780	708.35	1	0	1	0	0	0	0.0112544
7782	708.383	1	0	1	0	0	0	0.0112726
7784	708.417	1	0	1	0	0	0	0.0112496
7786	708.45	1	0	1	0	0	0	0.0112713
7788	708.483	1	0	1	0	0	0	0.0112395
7790	708.517	1	0	1	0	0	0	0.0112564
7792	708.55	1	0	1	0	0	0	0.011299
7794	708.583	1	0	1	0	0	0	0.0112845
7796	708.617	1	0	1	0	0	0	0.0112432
7798	708.65	1	0	1	0	0	0	0.0112567
7800	708.683	1	0	1	0	0	0	0.011249
7802	708.717	1	0	1	0	0	0	0.0112561
7804	708.75	1	0	1	0	0	0	0.0112662
7806	708.783	1	0	1	0	0	0	0.0112689
7808	708.817	1	0	1	0	0	0	0.0112442
7810	708.85	1	0	1	0	0	0	0.011231
7812	708.883	1	0	1	0	0	0	0.0112652
7814	708.917	1	0	1	0	0	0	0.0112638
7816	708.95	1	0	1	0	0	0	0.0112419
7818	708.983	1	0	1	0	0	0	0.0112581
7820	709.017	1	0	1	0	0	0	0.0112598
7822	709.05	1	0	1	0	0	0	0.0112215
7824	709.083	1	0	1	0	0	0	0.0112486
7826	709.117	1	0	1	0	0	0	0.0112703
7828	709.15	1	0	1	0	0	0	0.0112378
7830	709.183	1	0	1	0	0	0	0.0112527
7832	709.217	1	0	1	0	0	0	0.0112188
7834	709.25	1	0	1	0	0	0	0.0112483
7836	709.283	1	0	1	0	0	0	0.0112266
7838	709.317	1	0	1	0	0	0	0.0111803
7840	709.35	1	0	1	0	0	0	0.0112523
7842	709.383	1	0	1	0	0	0	0.0112865
7844	709.417	1	0	1	0	0	0	0.0112388
7846	709.45	1	0	1	0	0	0	0.0112388
7848	709.483	1	0	1	0	0	0	0.0112571
7850	709.517	1	0	1	0	0	0	0.0112232
7852	709.55	1	0	1	0	0	0	0.0112381
7854	709.583	1	0	1	0	0	0	0.0112178
7856	709.617	1	0	1	0	0	0	0.0112412
7858	709.65	1	0	1	0	0	0	0.0112354
7860	709.683	1	0	1	0	0	0	0.0112591
7862	709.717	1	0	1	0	0	0	0.0112276
7864	709.75	1	0	1	0	0	0	0.0112043
7866	709.783	1	0	1	0	0	0	0.0111864
7868	709.817	1	0	1	0	0	0	0.0112144
7870	709.85	1	0	1	0	0	0	0.0112002
7872	709.883	1	0	1	0	0	0	0.0112425
7874	709.917	1	0	1	0	0	0	0.0112171
7876	709.95	1	0	1	0	0	0	0.0112155
7878	709.983	1	0	1	0	0	0	0.011206
7880	710.017	1	0	1	0	0	0	0.0112561
7882	710.05	1	0	1	0	0	0	0.0112483
7884	710.083	1	0	1	0	0	0	0.0112368
7886	710.117	1	0	1	0	0	0	0.0112655
7888	710.15	1	0	1	0	0	0	0.0112496
7890	710.183	1	0	1	0	0	0	0.0112906
7892	710.217	1	0	1	0	0	0	0.0112605
7894	710.25	1	0	1	0	0	0	0.011253
7896	710.283	1	0	1	0	0	0	0.0112984
7898	710.317	1	0	1	0	0	0	0.0112324
7900	710.35	1	0	1	0	0	0	0.0112584
7902	710.383	1	0	1	0	0	0	0.0112466
7904	710.417	1	0	1	0	0	0	0.01125
7906	710.45	1	0	1	0	0	0	0.0112219
7908	710.483	1	0	1	0	0	0	0.0112557
7910	710.517	1	0	1	0	0	0	0.0112473
7912	710.55	1	0	1	0	0	0	0.0112398
7914	710.583	1	0	1	0	0	0	0.0112314
7916	710.617	1	0	1	0	0	0	0.0111958
7918	710.65	1	0	1	0	0	0	0.0112358
7920	710.683	1	0	1	0	0	0	0.0112121
7922	710.717	1	0	1	0	0	0	0.0112026
7924	710.75	1	0	1	0	0	0	0.0111843
7926	710.783	1	0	1	0	0	0	0.0112476
7928	710.817	1	0	1	0	0	0	0.0112114
7930	710.85	1	0	1	0	0	0	0.0112354
7932	710.883	1	0	1	0	0	0	0.0112303
7934	710.917	1	0	1	0	0	0	0.0111826
7936	710.95	1	0	1	0	0	0	0.0111975
7938	710.983	1	0	1	0	0	0	0.0111982
7940	711.017	1	0	1	0	0	0	0.011187
7942	711.05	1	0	1	0	0	0	0.0111728
7944	711.083	1	0	1	0	0	0	0.0112023
7946	711.117	1	0	1	0	0	0	0.0112158
7948	711.15	1	0	1	0	0	0	0.0112144
7950	711.183	1	0	1	0	0	0	0.0112611
7952	711.217	1	0	1	0	0	0	0.0111972
7954	711.25	1	0	1	0	0	0	0.011232
7956	711.283	1	0	1	0	0	0	0.0112371
7958	711.317	1	0	1	0	0	0	0.0112158
7960	711.35	1	0	1	0	0	0	0.0111965
7962	711.383	1	0	1	0	0	0	0.0112033
7964	711.417	1	0	1	0	0	0	0.0112178
7966	711.45	1	0	1	0	0	0	0.0111803
7968	711.483	1	0	1	0	0	0	0.011209
7970	711.517	1	0	1	0	0	0	0.0112131
7972	711.55	1	0	1	0	0	0	0.0112104
7974	711.583	1	0	1	0	0	0	0.0111715
7976	711.617	1	0	1	0	0	0	0.0111759
7978	711.65	1	0	1	0	0	0	0.0111681
7980	711.683	1	0	1	0	0	0	0.0111735
7982	711.717	1	0	1	0	0	0	0.011231
7984	711.75	1	0	1	0	0	0	0.0111748
7986	711.783	1	0	1	0	0	0	0.0111647
7988	711.817	1	0	1	0	0	0	0.0111982
7990	711.85	1	0	1	0	0	0	0.0111972
7992	711.883	1	0	1	0	0	0	0.0111721
7994	711.917	1	0	1	0	0	0	0.0111918
7996	711.95	1	0	1	0	0	0	0.0111962
7998	711.983	1	0	1	0	0	0	0.0111694
8000	712.017	1	0	1	0	0	0	0.0111674
8002	712.05	1	0	1	0	0	0	0.0112033
8004	712.083	1	0	1	0	0	0	0.0111569
8006	712.117	1	0	1	0	0	0	0.011161
8008	712.15	1	0	1	0	0	0	0.0111424
8010	712.183	1	0	1	0	0	0	0.0111193
8012	712.217	1	0	1	0	0	0	0.0111765
8014	712.25	1	0	1	0	0	0	0.0111691
8016	712.283	1	0	1	0	0	0	0.0111786
8018	712.317	1	0	1	0	0	0	0.0111407
8020	712.35	1	0	1	0	0	0	0.0111989
8022	712.383	1	0	1	0	0	0	0.0111809
8024	712.417	1	0	1	0	0	0	0.011231
8026	712.45	1	0	1	0	0	0	0.011185
8028	712.483	1	0	1	0	0	0	0.0111996
8030	712.517	1	0	1	0	0	0	0.0111603
8032	712.55	1	0	1	0	0	0	0.0112236
8034	712.583	1	0	1	0	0	0	0.0111914
8036	712.617	1	0	1	0	0	0	0.0112046
8038	712.65	1	0	1	0	0	0	0.0111962
8040	712.683	1	0	1	0	0	0	0.0112219
8042	712.717	1	0	1	0	0	0	0.011182
8044	712.75	1	0	1	0	0	0	0.0112094
8046	712.783	1	0	1	0	0	0	0.0112192
8048	712.817	1	0	1	0	0	0	0.0111999
8050	712.85	1	0	1	0	0	0	0.011227
8052	712.883	1	0	1	0	0	0	0.0111843
8054	712.917	1	0	1	0	0	0	0.0112114
8056	712.95	1	0	1	0	0	0	0.0112456
8058	712.983	1	0	1	0	0	0	0.0111992
8060	713.017	1	0	1	0	0	0	0.0111935
8062	713.05	1	0	1	0	0	0	0.0112327
8064	713.083	1	0	1	0	0	0	0.0111918
8066	713.117	1	0	1	0	0	0	0.0112134
8068	713.15	1	0	1	0	0	0	0.0111627
8070	713.183	1	0	1	0	0	0	0.0112151
8072	713.217	1	0	1	0	0	0	0.0112371
8074	713.25	1	0	1	0	0	0	0.0112442
8076	713.283	1	0	1	0	0	0	0.0112209
8078	713.317	1	0	1	0	0	0	0.0111603
8080	713.35	1	0	1	0	0	0	0.0112273
8082	713.383	1	0	1	0	0	0	0.0112158
8084	713.417	1	0	1	0	0	0	0.0112188
8086	713.45	1	0	1	0	0	0	0.0112232
8088	713.483	1	0	1	0	0	0	0.0112229
8090	713.517	1	0	1	0	0	0	0.0111515
8092	713.55	1	0	1	0	0	0	0.0112029
8094	713.583	1	0	1	0	0	0	0.0111999
8096	713.616	1	0	1	0	0	0	0.0111799
8098	713.65	1	0	1	0	0	0	0.0111938
8100	713.683	1	0	1	0	0	0	0.0112039
8102	713.716	1	0	1	0	0	0	0.0111972
8104	713.75	1	0	1	0	0	0	0.0111698
8106	713.783	1	0	1	0	0	0	0.011183
8108	713.816	1	0	1	0	0	0	0.0111836
8110	713.85	1	0	1	0	0	0	0.0111633
8112	713.883	1	0	1	0	0	0	0.0112002
8114	713.916	1	0	1	0	0	0	0.0111572
8116	713.95	1	0	1	0	0	0	0.011161
8118	713.983	1	0	1	0	0	0	0.0111234
8120	714.016	1	0	1	0	0	0	0.0111738
8122	714.05	1	0	1	0	0	0	0.0111654
8124	714.083	1	0	1	0	0	0	0.0111383
8126	714.116	1	0	1	0	0	0	0.0111809
8128	714.15	1	0	1	0	0	0	0.0111657
8130	714.183	1	0	1	0	0	0	0.0111732
8132	714.216	1	0	1	0	0	0	0.0112127
8134	714.25	1	0	1	0	0	0	0.0111952
8136	714.283	1	0	1	0	0	0	0.011164
8138	714.316	1	0	1	0	0	0	0.01121
8140	714.35	1	0	1	0	0	0	0.0111782
8142	714.383	1	0	1	0	0	0	0.0111474
8144	714.416	1	0	1	0	0	0	0.0111911
8146	714.45	1	0	1	0	0	0	0.011184
8148	714.483	1	0	1	0	0	0	0.0111735
8150	714.516	1	0	1	0	0	0	0.0111484
8152	714.55	1	0	1	0	0	0	0.011161
8154	714.583	1	0	1	0	0	0	0.0111762
8156	714.616	1	0	1	0	0	0	0.0111958
8158	714.65	1	0	1	0	0	0	0.0112192
8160	714.683	1	0	1	0	0	0	0.0111681
8162	714.716	1	0	1	0	0	0	0.0112002
8164	714.75	1	0	1	0	0	0	0.0111353
8166	714.783	1	0	1	0	0	0	0.011206
8168	714.816	1	0	1	0	0	0	0.0112097
8170	714.85	1	0	1	0	0	0	0.0112131
8172	714.883	1	0	1	0	0	0	0.0112222
8174	714.916	1	0	1	0	0	0	0.0112327
8176	714.95	1	0	1	0	0	0	0.011253
8178	714.983	1	0	1	0	0	0	0.0111985
8180	715.016	1	0	1	0	0	0	0.0112243
8182	715.05	1	0	1	0	0	0	0.01123
8184	715.083	1	0	1	0	0	0	0.0111694
8186	715.116	1	0	1	0	0	0	0.0111474
8188	715.15	1	0	1	0	0	0	0.0112165
8190	715.183	1	0	1	0	0	0	0.0111424
8192	715.216	1	0	1	0	0	0	0.0111742
8194	715.25	1	0	1	0	0	0	0.0111745
8196	715.283	1	0	1	0	0	0	0.0111914
8198	715.316	1	0	1	0	0	0	0.0111914
8200	715.35	1	0	1	0	0	0	0.0111765
8202	715.383	1	0	1	0	0	0	0.011188
8204	715.416	1	0	1	0	0	0	0.0111677
8206	715.45	1	0	1	0	0	0	0.0111667
8208	715.483	1	0	1	0	0	0	0.0111904
8210	715.516	1	0	1	0	0	0	0.0111664
8212	715.55	1	0	1	0	0	0	0.0111704
8214	715.583	1	0	1	0	0	0	0.0111535
8216	715.616	1	0	1	0	0	0	0.0111589
8218	715.65	1	0	1	0	0	0	0.0111244
8220	715.683	1	0	1	0	0	0	0.0111424
8222	715.716	1	0	1	0	0	0	0.011141
8224	715.75	1	0	1	0	0	0	0.0111349
8226	715.783	1	0	1	0	0	0	0.0111535
8228	715.816	1	0	1	0	0	0	0.0111034
8230	715.85	1	0	1	0	0	0	0.0110831
8232	715.883	1	0	1	0	0	0	0.0111166
8234	715.916	1	0	1	0	0	0	0.0111542
8236	715.95	1	0	1	0	0	0	0.0111586
8238	715.983	1	0	1	0	0	0	0.0111454
8240	716.016	1	0	1	0	0	0	0.0111826
8242	716.05	1	0	1	0	0	0	0.0111315
8244	716.083	1	0	1	0	0	0	0.011166
8246	716.116	1	0	1	0	0	0	0.0111657
8248	716.15	1	0	1	0	0	0	0.0111657
8250	716.183	1	0	1	0	0	0	0.0111522
8252	716.216	1	0	1	0	0	0	0.0111694
8254	716.25	1	0	1	0	0	0	0.0111772
8256	716.283	1	0	1	0	0	0	0.0112019
8258	716.316	1	0	1	0	0	0	0.0112138
8260	716.35	1	0	1	0	0	0	0.0111928
8262	716.383	1	0	1	0	0	0	0.0112127
8264	716.416	1	0	1	0	0	0	0.0111813
8266	716.45	1	0	1	0	0	0	0.0111776
8268	716.483	1	0	1	0	0	0	0.0112175
8270	716.516	1	0	1	0	0	0	0.0112158
8272	716.55	1	0	1	0	0	0	0.0111847
8274	716.583	1	0	1	0	0	0	0.0111765
8276	716.616	1	0	1	0	0	0	0.0111826
8278	716.65	1	0	1	0	0	0	0.0111782
8280	716.683	1	0	1	0	0	0	0.0111806
8282	716.716	1	0	1	0	0	0	0.0111864
8284	716.75	1	0	1	0	0	0	0.0111904
8286	716.783	1	0	1	0	0	0	0.0111721
8288	716.816	1	0	1	0	0	0	0.0111447
8290	716.85	1	0	1	0	0	0	0.0111441
8292	716.883	1	0	1	0	0	0	0.0111616
8294	716.916	1	0	1	0	0	0	0.0111606
8296	716.95	1	0	1	0	0	0	0.0111755
8298	716.983	1	0	1	0	0	0	0.011138
8300	717.016	1	0	1	0	0	0	0.0111528
8302	717.05	1	0	1	0	0	0	0.0111789
8304	717.083	1	0	1	0	0	0	0.0112026
8306	717.116	1	0	1	0	0	0	0.0111505
8308	717.15	1	0	1	0	0	0	0.0111884
8310	717.183	1	0	1	0	0	0	0.0111579
8312	717.216	1	0	1	0	0	0	0.0111708
8314	717.25	1	0	1	0	0	0	0.0111776
8316	717.283	1	0	1	0	0	0	0.0112039
8318	717.316	1	0	1	0	0	0	0.0111748
8320	717.35	1	0	1	0	0	0	0.0111847
8322	717.383	1	0	1	0	0	0	0.0111721
8324	717.416	1	0	1	0	0	0	0.0111975
8326	717.45	1	0	1	0	0	0	0.0111776
8328	717.483	1	0	1	0	0	0	0.01116
8330	717.516	1	0	1	0	0	0	0.011162
8332	717.55	1	0	1	0	0	0	0.0111806
8334	717.583	1	0	1	0	0	0	0.0111454
8336	717.616	1	0	1	0	0	0	0.011161
8338	717.65	1	0	1	0	0	0	0.0111491
8340	717.683	1	0	1	0	0	0	0.0111657
8342	717.716	1	0	1	0	0	0	0.011138
8344	717.75	1	0	1	0	0	0	0.0111562
8346	717.783	1	0	1	0	0	0	0.0111613
8348	717.816	1	0	1	0	0	0	0.0111701
8350	717.85	1	0	1	0	0	0	0.0111522
8352	717.883	1	0	1	0	0	0	0.0111532
8354	717.916	1	0	1	0	0	0	0.0111471
8356	717.95	1	0	1	0	0	0	0.0111908
8358	717.983	1	0	1	0	0	0	0.0111488
8360	718.016	1	0	1	0	0	0	0.0111782
8362	718.05	1	0	1	0	0	0	0.0111786
8364	718.083	1	0	1	0	0	0	0.0111698
8366	718.116	1	0	1	0	0	0	0.0111569
8368	718.15	1	0	1	0	0	0	0.0111792
8370	718.183	1	0	1	0	0	0	0.0111654
8372	718.216	1	0	1	0	0	0	0.0111556
8374	718.25	1	0	1	0	0	0	0.0111843
8376	718.283	1	0	1	0	0	0	0.0111772
8378	718.316	1	0	1	0	0	0	0.0111322
8380	718.35	1	0	1	0	0	0	0.0111688
8382	718.383	1	0	1	0	0	0	0.0111501
8384	718.416	1	0	1	0	0	0	0.0111941
8386	718.45	1	0	1	0	0	0	0.0111715
8388	718.483	1	0	1	0	0	0	0.0111782
8390	718.516	1	0	1	0	0	0	0.0111099
8392	718.55	1	0	1	0	0	0	0.0111715
8394	718.583	1	0	1	0	0	0	0.0111515
8396	718.616	1	0	1	0	0	0	0.0111694
8398	718.65	1	0	1	0	0	0	0.0111447
8400	718.683	1	0	1	0	0	0	0.0111302
8402	718.716	1	0	1	0	0	0	0.0110943
8404	718.75	1	0	1	0	0	0	0.0111403
8406	718.783	1	0	1	0	0	0	0.0111285
8408	718.816	1	0	1	0	0	0	0.011077
8410	718.85	1	0	1	0	0	0	0.0111092
8412	718.883	1	0	1	0	0	0	0.0110973
8414	718.916	1	0	1	0	0	0	0.0111424
8416	718.95	1	0	1	0	0	0	0.0111627
8418	718.983	1	0	1	0	0	0	0.0111671
8420	719.016	1	0	1	0	0	0	0.0111803
8422	719.05	1	0	1	0	0	0	0.0111353
8424	719.083	1	0	1	0	0	0	0.0111891
8426	719.116	1	0	1	0	0	0	0.0111596
8428	719.15	1	0	1	0	0	0	0.0111864
8430	719.183	1	0	1	0	0	0	0.0111596
8432	719.216	1	0	1	0	0	0	0.0111491
8434	719.25	1	0	1	0	0	0	0.0111901
8436	719.283	1	0	1	0	0	0	0.0111535
8438	719.316	1	0	1	0	0	0	0.0111809
8440	719.35	1	0	1	0	0	0	0.0111803
8442	719.383	1	0	1	0	0	0	0.0111556
8444	719.416	1	0	1	0	0	0	0.0111979
8446	719.45	1	0	1	0	0	0	0.0111752
8448	719.483	1	0	1	0	0	0	0.0111627
8450	719.516	1	0	1	0	0	0	0.0111589
8452	719.55	1	0	1	0	0	0	0.0111792
8454	719.583	1	0	1	0	0	0	0.0111271
8456	719.616	1	0	1	0	0	0	0.0111671
8458	719.65	1	0	1	0	0	0	0.0111498
8460	719.683	1	0	1	0	0	0	0.0111579
8462	719.716	1	0	1	0	0	0	0.0111163
8464	719.75	1	0	1	0	0	0	0.0111674
8466	719.783	1	0	1	0	0	0	0.0111193
8468	719.816	1	0	1	0	0	0	0.0111315
8470	719.85	1	0	1	0	0	0	0.0110919
8472	719.883	1	0	1	0	0	0	0.0111136
8474	719.916	1	0	1	0	0	0	0.0111133
8476	719.95	1	0	1	0	0	0	0.0110902
8478	719.983	1	0	1	0	0	0	0.0111001
8480	720.016	1	0	1	0	0	0	0.011075
8482	720.05	1	0	1	0	0	0	0.0110825
8484	720.083	1	0	1	0	0	0	0.0110757
8486	720.116	1	0	1	0	0	0	0.0110733
8488	720.15	1	0	1	0	0	0	0.0110764
8490	720.183	1	0	1	0	0	0	0.0110774
8492	720.216	1	0	1	0	0	0	0.0111349
8494	720.25	1	0	1	0	0	0	0.0110967
8496	720.283	1	0	1	0	0	0	0.0111156
8498	720.316	1	0	1	0	0	0	0.0110676
8500	720.35	1	0	1	0	0	0	0.0110794
8502	720.383	1	0	1	0	0	0	0.0110889
8504	720.416	1	0	1	0	0	0	0.0110652
8506	720.45	1	0	1	0	0	0	0.0110622
8508	720.483	1	0	1	0	0	0	0.0110848
8510	720.516	1	0	1	0	0	0	0.0110666
8512	720.55	1	0	1	0	0	0	0.0110913
8514	720.583	1	0	1	0	0	0	0.0110564
8516	720.616	1	0	1	0	0	0	0.011142
8518	720.65	1	0	1	0	0	0	0.0111339
8520	720.683	1	0	1	0	0	0	0.0111285
8522	720.716	1	0	1	0	0	0	0.0110798
8524	720.75	1	0	1	0	0	0	0.0110554
8526	720.783	1	0	1	0	0	0	0.0110957
8528	720.816	1	0	1	0	0	0	0.0111177
8530	720.85	1	0	1	0	0	0	0.0110544
8532	720.883	1	0	1	0	0	0	0.0110933
8534	720.916	1	0	1	0	0	0	0.0110804
8536	720.95	1	0	1	0	0	0	0.0111058
8538	720.983	1	0	1	0	0	0	0.0110913
8540	721.016	1	0	1	0	0	0	0.0111122
8542	721.05	1	0	1	0	0	0	0.0110902
8544	721.083	1	0	1	0	0	0	0.0111329
8546	721.116	1	0	1	0	0	0	0.0111011
8548	721.15	1	0	1	0	0	0	0.0110622
8550	721.183	1	0	1	0	0	0	0.0111366
8552	721.216	1	0	1	0	0	0	0.0111102
8554	721.25	1	0	1	0	0	0	0.0111068
8556	721.283	1	0	1	0	0	0	0.0111153
8558	721.316	1	0	1	0	0	0	0.0110984
8560	721.35	1	0	1	0	0	0	0.0111339
8562	721.383	1	0	1	0	0	0	0.0111535
8564	721.416	1	0	1	0	0	0	0.0110943
8566	721.45	1	0	1	0	0	0	0.0111126
8568	721.483	1	0	1	0	0	0	0.0111234
8570	721.516	1	0	1	0	0	0	0.011138
8572	721.55	1	0	1	0	0	0	0.0111444
8574	721.583	1	0	1	0	0	0	0.0111637
8576	721.616	1	0	1	0	0	0	0.0111461
8578	721.65	1	0	1	0	0	0	0.0111004
8580	721.683	1	0	1	0	0	0	0.0111244
8582	721.716	1	0	1	0	0	0	0.0111363
8584	721.75	1	0	1	0	0	0	0.0111143
8586	721.783	1	0	1	0	0	0	0.011099
8588	721.816	1	0	1	0	0	0	0.0110906
8590	721.85	1	0	1	0	0	0	0.0111346
8592	721.883	1	0	1	0	0	0	0.0111383
8594	721.916	1	0	1	0	0	0	0.0110564
8596	721.95	1	0	1	0	0	0	0.0110913
8598	721.983	1	0	1	0	0	0	0.0111099
8600	722.016	1	0	1	0	0	0	0.0111528
8602	722.05	1	0	1	0	0	0	0.0111271
8604	722.083	1	0	1	0	0	0	0.0111105
8606	722.116	1	0	1	0	0	0	0.0111133
8608	722.149	1	0	1	0	0	0	0.0111329
8610	722.183	1	0	1	0	0	0	0.0111572
8612	722.216	1	0	1	0	0	0	0.0111105
8614	722.249	1	0	1	0	0	0	0.0111522
8616	722.283	1	0	1	0	0	0	0.0110578
8618	722.316	1	0	1	0	0	0	0.0110716
8620	722.349	1	0	1	0	0	0	0.01112
8622	722.383	1	0	1	0	0	0	0.0110957
8624	722.416	1	0	1	0	0	0	0.0110699
8626	722.449	1	0	1	0	0	0	0.011099
8628	722.483	1	0	1	0	0	0	0.0110757
8630	722.516	1	0	1	0	0	0	0.0111217
8632	722.549	1	0	1	0	0	0	0.0110574
8634	722.583	1	0	1	0	0	0	0.0110151
8636	722.616	1	0	1	0	0	0	0.0110767
8638	722.649	1	0	1	0	0	0	0.0110506
8640	722.683	1	0	1	0	0	0	0.011027
8642	722.716	1	0	1	0	0	0	0.0110239
8644	722.749	1	0	1	0	0	0	0.011055
8646	722.783	1	0	1	0	0	0	0.0110777
8648	722.816	1	0	1	0	0	0	0.0110896
8650	722.849	1	0	1	0	0	0	0.0110547
8652	722.883	1	0	1	0	0	0	0.011077
8654	722.916	1	0	1	0	0	0	0.0110638
8656	722.949	1	0	1	0	0	0	0.0110818
8658	722.983	1	0	1	0	0	0	0.0110266
8660	723.016	1	0	1	0	0	0	0.0110077
8662	723.049	1	0	1	0	0	0	0.0110517
8664	723.083	1	0	1	0	0	0	0.0109823
8666	723.116	1	0	1	0	0	0	0.0109914
8668	723.149	1	0	1	0	0	0	0.0110395
8670	723.183	1	0	1	0	0	0	0.0110063
8672	723.216	1	0	1	0	0	0	0.0110655
8674	723.249	1	0	1	0	0	0	0.0109931
8676	723.283	1	0	1	0	0	0	0.0110645
8678	723.316	1	0	1	0	0	0	0.0110625
8680	723.349	1	0	1	0	0	0	0.0110605
8682	723.383	1	0	1	0	0	0	0.0110418
8684	723.416	1	0	1	0	0	0	0.0110933
8686	723.449	1	0	1	0	0	0	0.0110561
8688	723.483	1	0	1	0	0	0	0.0110246
8690	723.516	1	0	1	0	0	0	0.0111011
8692	723.549	1	0	1	0	0	0	0.0110618
8694	723.583	1	0	1	0	0	0	0.0110205
8696	723.616	1	0	1	0	0	0	0.0111024
8698	723.649	1	0	1	0	0	0	0.0110848
8700	723.683	1	0	1	0	0	0	0.011052
8702	723.716	1	0	1	0	0	0	0.0110449
8704	723.749	1	0	1	0	0	0	0.0111017
8706	723.783	1	0	1	0	0	0	0.0110578
8708	723.816	1	0	1	0	0	0	0.0111102
8710	723.849	1	0	1	0	0	0	0.01105
8712	723.883	1	0	1	0	0	0	0.0110689
8714	723.916	1	0	1	0	0	0	0.0110344
8716	723.949	1	0	1	0	0	0	0.0110693
8718	723.983	1	0	1	0	0	0	0.0111095
8720	724.016	1	0	1	0	0	0	0.011052
8722	724.049	1	0	1	0	0	0	0.01105
8724	724.083	1	0	1	0	0	0	0.0110649
8726	724.116	1	0	1	0	0	0	0.0110493
8728	724.149	1	0	1	0	0	0	0.0111102
8730	724.183	1	0	1	0	0	0	0.0110628
8732	724.216	1	0	1	0	0	0	0.0110334
8734	724.249	1	0	1	0	0	0	0.0110317
8736	724.283	1	0	1	0	0	0	0.0110249
8738	724.316	1	0	1	0	0	0	0.0110063
8740	724.349	1	0	1	0	0	0	0.0110097
8742	724.383	1	0	1	0	0	0	0.0110273
8744	724.416	1	0	1	0	0	0	0.0109979
8746	724.449	1	0	1	0	0	0	0.0109951
8748	724.483	1	0	1	0	0	0	0.0110046
8750	724.516	1	0	1	0	0	0	0.0110195
8752	724.549	1	0	1	0	0	0	0.0110249
8754	724.583	1	0	1	0	0	0	0.0110297
8756	724.616	1	0	1	0	0	0	0.0110104
8758	724.649	1	0	1	0	0	0	0.0109877
8760	724.683	1	0	1	0	0	0	0.011028
8762	724.716	1	0	1	0	0	0	0.0109799
8764	724.749	1	0	1	0	0	0	0.0110215
8766	724.783	1	0	1	0	0	0	0.0110347
8768	724.816	1	0	1	0	0	0	0.0110087
8770	724.849	1	0	1	0	0	0	0.0110232
8772	724.883	1	0	1	0	0	0	0.011055
8774	724.916	1	0	1	0	0	0	0.011032
8776	724.949	1	0	1	0	0	0	0.0110378
8778	724.983	1	0	1	0	0	0	0.0110713
8780	725.016	1	0	1	0	0	0	0.0110408
8782	725.049	1	0	1	0	0	0	0.0110669
8784	725.083	1	0	1	0	0	0	0.0110483
8786	725.116	1	0	1	0	0	0	0.0110462
8788	725.149	1	0	1	0	0	0	0.0110479
8790	725.183	1	0	1	0	0	0	0.0110737
8792	725.216	1	0	1	0	0	0	0.0110517
8794	725.249	1	0	1	0	0	0	0.0110476
8796	725.283	1	0	1	0	0	0	0.0110757
8798	725.316	1	0	1	0	0	0	0.0110418
8800	725.349	1	0	1	0	0	0	0.0111119
8802	725.383	1	0	1	0	0	0	0.0110669
8804	725.416	1	0	1	0	0	0	0.011029
8806	725.449	1	0	1	0	0	0	0.0110703
8808	725.483	1	0	1	0	0	0	0.0110896
8810	725.516	1	0	1	0	0	0	0.0110513
8812	725.549	1	0	1	0	0	0	0.0110676
8814	725.583	1	0	1	0	0	0	0.0110801
8816	725.616	1	0	1	0	0	0	0.011097
8818	725.649	1	0	1	0	0	0	0.0110726
8820	725.683	1	0	1	0	0	0	0.0110537
8822	725.716	1	0	1	0	0	0	0.0110726
8824	725.749	1	0	1	0	0	0	0.0110913
8826	725.783	1	0	1	0	0	0	0.0110402
8828	725.816	1	0	1	0	0	0	0.0110594
8830	725.849	1	0	1	0	0	0	0.0110622
8832	725.883	1	0	1	0	0	0	0.0110632
8834	725.916	1	0	1	0	0	0	0.0110615
8836	725.949	1	0	1	0	0	0	0.0110682
8838	725.983	1	0	1	0	0	0	0.0110682
8840	726.016	1	0	1	0	0	0	0.0110774
8842	726.049	1	0	1	0	0	0	0.0110953
8844	726.083	1	0	1	0	0	0	0.0110432
8846	726.116	1	0	1	0	0	0	0.0110398
8848	726.149	1	0	1	0	0	0	0.0110138
8850	726.183	1	0	1	0	0	0	0.0110148
8852	726.216	1	0	1	0	0	0	0.0110161
8854	726.249	1	0	1	0	0	0	0.0109863
8856	726.283	1	0	1	0	0	0	0.0110327
8858	726.316	1	0	1	0	0	0	0.0110276
8860	726.349	1	0	1	0	0	0	0.0110297
8862	726.383	1	0	1	0	0	0	0.0110523
8864	726.416	1	0	1	0	0	0	0.0110963
8866	726.449	1	0	1	0	0	0	0.0110902
8868	726.483	1	0	1	0	0	0	0.011074
8870	726.516	1	0	1	0	0	0	0.0110814
8872	726.549	1	0	1	0	0	0	0.0110686
8874	726.583	1	0	1	0	0	0	0.0110784
8876	726.616	1	0	1	0	0	0	0.0110896
8878	726.649	1	0	1	0	0	0	0.0110838
8880	726.683	1	0	1	0	0	0	0.011074
8882	726.716	1	0	1	0	0	0	0.0110913
8884	726.749	1	0	1	0	0	0	0.0110899
8886	726.783	1	0	1	0	0	0	0.0110679
8888	726.816	1	0	1	0	0	0	0.0111112
8890	726.849	1	0	1	0	0	0	0.0111187
8892	726.883	1	0	1	0	0	0	0.0110875
8894	726.916	1	0	1	0	0	0	0.0111055
8896	726.949	1	0	1	0	0	0	0.011121
8898	726.983	1	0	1	0	0	0	0.0110821
8900	727.016	1	0	1	0	0	0	0.0110588
8902	727.049	1	0	1	0	0	0	0.0110188
8904	727.083	1	0	1	0	0	0	0.0109941
8906	727.116	1	0	1	0	0	0	0.01101
8908	727.149	1	0	1	0	0	0	0.0110246
8910	727.183	1	0	1	0	0	0	0.0110256
8912	727.216	1	0	1	0	0	0	0.0110161
8914	727.249	1	0	1	0	0	0	0.0110111
8916	727.283	1	0	1	0	0	0	0.0110151
8918	727.316	1	0	1	0	0	0	0.0110378
8920	727.349	1	0	1	0	0	0	0.0110273
8922	727.383	1	0	1	0	0	0	0.0110354
8924	727.416	1	0	1	0	0	0	0.011009
8926	727.449	1	0	1	0	0	0	0.0109877
8928	727.483	1	0	1	0	0	0	0.0110293
8930	727.516	1	0	1	0	0	0	0.0110476
8932	727.549	1	0	1	0	0	0	0.0110138
8934	727.583	1	0	1	0	0	0	0.0110415
8936	727.616	1	0	1	0	0	0	0.0110175
8938	727.649	1	0	1	0	0	0	0.0110405
8940	727.683	1	0	1	0	0	0	0.0110046
8942	727.716	1	0	1	0	0	0	0.0110466
8944	727.749	1	0	1	0	0	0	0.0110256
8946	727.783	1	0	1	0	0	0	0.0110358
8948	727.816	1	0	1	0	0	0	0.0110056
8950	727.849	1	0	1	0	0	0	0.011007
8952	727.883	1	0	1	0	0	0	0.0110249
8954	727.916	1	0	1	0	0	0	0.0109965
8956	727.949	1	0	1	0	0	0	0.011008
8958	727.983	1	0	1	0	0	0	0.0110006
8960	728.016	1	0	1	0	0	0	0.011032
8962	728.049	1	0	1	0	0	0	0.0109995
8964	728.083	1	0	1	0	0	0	0.0110645
8966	728.116	1	0	1	0	0	0	0.0110209
8968	728.149	1	0	1	0	0	0	0.0110347
8970	728.183	1	0	1	0	0	0	0.0110483
8972	728.216	1	0	1	0	0	0	0.0110459
8974	728.249	1	0	1	0	0	0	0.0110723
8976	728.283	1	0	1	0	0	0	0.0110466
8978	728.316	1	0	1	0	0	0	0.0110655
8980	728.349	1	0	1	0	0	0	0.0110611
8982	728.383	1	0	1	0	0	0	0.0110835
8984	728.416	1	0	1	0	0	0	0.0110584
8986	728.449	1	0	1	0	0	0	0.0110456
8988	728.483	1	0	1	0	0	0	0.0110699
8990	728.516	1	0	1	0	0	0	0.0110358
8992	728.549	1	0	1	0	0	0	0.0110544
8994	728.583	1	0	1	0	0	0	0.0110456
8996	728.616	1	0	1	0	0	0	0.0110581
8998	728.649	1	0	1	0	0	0	0.0110632
9000	728.683	1	0	1	0	0	0	0.0110567
9002	728.716	1	0	1	0	0	0	0.0110378
9004	728.749	1	0	1	0	0	0	0.0110107
9006	728.783	1	0	1	0	0	0	0.0110097
9008	728.816	1	0	1	0	0	0	0.0110591
9010	728.849	1	0	1	0	0	0	0.0110239
9012	728.883	1	0	1	0	0	0	0.0110537
9014	728.916	1	0	1	0	0	0	0.0110422
9016	728.949	1	0	1	0	0	0	0.0110043
9018	728.983	1	0	1	0	0	0	0.0110703
9020	729.016	1	0	1	0	0	0	0.0110564
9022	729.049	1	0	1	0	0	0	0.011052
9024	729.083	1	0	1	0	0	0	0.0110239
9026	729.116	1	0	1	0	0	0	0.0110916
9028	729.149	1	0	1	0	0	0	0.0110791
9030	729.183	1	0	1	0	0	0	0.0110733
9032	729.216	1	0	1	0	0	0	0.0110814
9034	729.249	1	0	1	0	0	0	0.0110561
9036	729.283	1	0	1	0	0	0	0.0110473
9038	729.316	1	0	1	0	0	0	0.0110297
9040	729.349	1	0	1	0	0	0	0.0110398
9042	729.383	1	0	1	0	0	0	0.0110256
9044	729.416	1	0	1	0	0	0	0.0110473
9046	729.449	1	0	1	0	0	0	0.0110205
9048	729.483	1	0	1	0	0	0	0.0110195
9050	729.516	1	0	1	0	0	0	0.0110391
9052	729.549	1	0	1	0	0	0	0.011027
9054	729.583	1	0	1	0	0	0	0.0110557
9056	729.616	1	0	1	0	0	0	0.0110747
9058	729.649	1	0	1	0	0	0	0.0110378
9060	729.683	1	0	1	0	0	0	0.0110913
9062	729.716	1	0	1	0	0	0	0.0110977
9064	729.749	1	0	1	0	0	0	0.01114
9066	729.783	1	0	1	0	0	0	0.0110997
9068	729.816	1	0	1	0	0	0	0.0111041
9070	729.849	1	0	1	0	0	0	0.0111214
9072	729.882	1	0	1	0	0	0	0.0110977
9074	729.916	1	0	1	0	0	0	0.0111298
9076	729.949	1	0	1	0	0	0	0.0110831
9078	729.982	1	0	1	0	0	0	0.0110987
9080	730.016	1	0	1	0	0	0	0.0110801
9082	730.049	1	0	1	0	0	0	0.0110682
9084	730.082	1	0	1	0	0	0	0.0110896
9086	730.116	1	0	1	0	0	0	0.0110557
9088	730.149	1	0	1	0	0	0	0.0110764
9090	730.182	1	0	1	0	0	0	0.0110865
9092	730.216	1	0	1	0	0	0	0.0110574
9094	730.249	1	0	1	0	0	0	0.0110422
9096	730.282	1	0	1	0	0	0	0.0110513
9098	730.316	1	0	1	0	0	0	0.0109945
9100	730.349	1	0	1	0	0	0	0.0110094
9102	730.382	1	0	1	0	0	0	0.0109623
9104	730.416	1	0	1	0	0	0	0.0109725
9106	730.449	1	0	1	0	0	0	0.0109644
9108	730.482	1	0	1	0	0	0	0.0109495
9110	730.516	1	0	1	0	0	0	0.0109813
9112	730.549	1	0	1	0	0	0	0.0109413
9114	730.582	1	0	1	0	0	0	0.0109745
9116	730.616	1	0	1	0	0	0	0.0109149
9118	730.649	1	0	1	0	0	0	0.0109691
9120	730.682	1	0	1	0	0	0	0.0109495
9122	730.716	1	0	1	0	0	0	0.0109579
9124	730.749	1	0	1	0	0	0	0.0109447
9126	730.782	1	0	1	0	0	0	0.0109742
9128	730.816	1	0	1	0	0	0	0.0110222
9130	730.849	1	0	1	0	0	0	0.0110503
9132	730.882	1	0	1	0	0	0	0.0109613
9134	730.916	1	0	1	0	0	0	0.0109894
9136	730.949	1	0	1	0	0	0	0.0109623
9138	730.982	1	0	1	0	0	0	0.0109413
9140	731.016	1	0	1	0	0	0	0.0109809
9142	731.049	1	0	1	0	0	0	0.0109112
9144	731.082	1	0	1	0	0	0	0.0109457
9146	731.116	1	0	1	0	0	0	0.0109647
9148	731.149	1	0	1	0	0	0	0.010966
9150	731.182	1	0	1	0	0	0	0.0109383
9152	731.216	1	0	1	0	0	0	0.0109884
9154	731.249	1	0	1	0	0	0	0.0109677
9156	731.282	1	0	1	0	0	0	0.0109738
9158	731.316	1	0	1	0	0	0	0.0109887
9160	731.349	1	0	1	0	0	0	0.0109701
9162	731.382	1	0	1	0	0	0	0.0109681
9164	731.416	1	0	1	0	0	0	0.0109488
9166	731.449	1	0	1	0	0	0	0.0110039
9168	731.482	1	0	1	0	0	0	0.011031
9170	731.516	1	0	1	0	0	0	0.010985
9172	731.549	1	0	1	0	0	0	0.011052
9174	731.582	1	0	1	0	0	0	0.0109989
9176	731.616	1	0	1	0	0	0	0.010988
9178	731.649	1	0	1	0	0	0	0.0110391
9180	731.682	1	0	1	0	0	0	0.0110483
9182	731.716	1	0	1	0	0	0	0.0110354
9184	731.749	1	0	1	0	0	0	0.0110232
9186	731.782	1	0	1	0	0	0	0.0110476
9188	731.816	1	0	1	0	0	0	0.01105
9190	731.849	1	0	1	0	0	0	0.0110026
9192	731.882	1	0	1	0	0	0	0.0110073
9194	731.916	1	0	1	0	0	0	0.011031
9196	731.949	1	0	1	0	0	0	0.0110314
9198	731.982	1	0	1	0	0	0	0.0110182
9200	732.016	1	0	1	0	0	0	0.0110608
9202	732.049	1	0	1	0	0	0	0.0110155
9204	732.082	1	0	1	0	0	0	0.0110117
9206	732.116	1	0	1	0	0	0	0.0110601
9208	732.149	1	0	1	0	0	0	0.0110192
9210	732.182	1	0	1	0	0	0	0.0109948
9212	732.216	1	0	1	0	0	0	0.0110202
9214	732.249	1	0	1	0	0	0	0.0110466
9216	732.282	1	0	1	0	0	0	0.0110161
9218	732.316	1	0	1	0	0	0	0.010988
9220	732.349	1	0	1	0	0	0	0.0109684
9222	732.382	1	0	1	0	0	0	0.0110462
9224	732.416	1	0	1	0	0	0	0.0110287
9226	732.449	1	0	1	0	0	0	0.010966
9228	732.482	1	0	1	0	0	0	0.0110141
9230	732.516	1	0	1	0	0	0	0.0110131
9232	732.549	1	0	1	0	0	0	0.0110097
9234	732.582	1	0	1	0	0	0	0.0110253
9236	732.616	1	0	1	0	0	0	0.011008
9238	732.649	1	0	1	0	0	0	0.0109545
9240	732.682	1	0	1	0	0	0	0.0109962
9242	732.716	1	0	1	0	0	0	0.0109627
9244	732.749	1	0	1	0	0	0	0.0109897
9246	732.782	1	0	1	0	0	0	0.0109775
9248	732.816	1	0	1	0	0	0	0.0110121
9250	732.849	1	0	1	0	0	0	0.011008
9252	732.882	1	0	1	0	0	0	0.0109813
9254	732.916	1	0	1	0	0	0	0.0110388
9256	732.949	1	0	1	0	0	0	0.0109962
9258	732.982	1	0	1	0	0	0	0.0110236
9260	733.016	1	0	1	0	0	0	0.0110033
9262	733.049	1	0	1	0	0	0	0.011027
9264	733.082	1	0	1	0	0	0	0.0110083
9266	733.116	1	0	1	0	0	0	0.0109999
9268	733.149	1	0	1	0	0	0	0.0110192
9270	733.182	1	0	1	0	0	0	0.0110232
9272	733.216	1	0	1	0	0	0	0.0109657
9274	733.249	1	0	1	0	0	0	0.0110239
9276	733.282	1	0	1	0	0	0	0.0110212
9278	733.316	1	0	1	0	0	0	0.0109698
9280	733.349	1	0	1	0	0	0	0.0109904
9282	733.382	1	0	1	0	0	0	0.0109539
9284	733.416	1	0	1	0	0	0	0.0110016
9286	733.449	1	0	1	0	0	0	0.0109894
9288	733.482	1	0	1	0	0	0	0.0110293
9290	733.516	1	0	1	0	0	0	0.0109857
9292	733.549	1	0	1	0	0	0	0.010983
9294	733.582	1	0	1	0	0	0	0.0109545
9296	733.616	1	0	1	0	0	0	0.0109285
9298	733.649	1	0	1	0	0	0	0.010966
9300	733.682	1	0	1	0	0	0	0.0109732
9302	733.716	1	0	1	0	0	0	0.0109346
9304	733.749	1	0	1	0	0	0	0.0109627
9306	733.782	1	0	1	0	0	0	0.010983
9308	733.816	1	0	1	0	0	0	0.0110077
9310	733.849	1	0	1	0	0	0	0.0109725
9312	733.882	1	0	1	0	0	0	0.0110114
9314	733.916	1	0	1	0	0	0	0.0109836
9316	733.949	1	0	1	0	0	0	0.010987
9318	733.982	1	0	1	0	0	0	0.010963
9320	734.016	1	0	1	0	0	0	0.0109891
9322	734.049	1	0	1	0	0	0	0.0110029
9324	734.082	1	0	1	0	0	0	0.0109792
9326	734.116	1	0	1	0	0	0	0.0110418
9328	734.149	1	0	1	0	0	0	0.0110215
9330	734.182	1	0	1	0	0	0	0.0110144
9332	734.216	1	0	1	0	0	0	0.0109512
9334	734.249	1	0	1	0	0	0	0.0109945
9336	734.282	1	0	1	0	0	0	0.0109843
9338	734.316	1	0	1	0	0	0	0.010964
9340	734.349	1	0	1	0	0	0	0.0109688
9342	734.382	1	0	1	0	0	0	0.0109962
9344	734.416	1	0	1	0	0	0	0.0110063
9346	734.449	1	0	1	0	0	0	0.0109373
9348	734.482	1	0	1	0	0	0	0.0110073
9350	734.516	1	0	1	0	0	0	0.0109728
9352	734.549	1	0	1	0	0	0	0.0109738
9354	734.582	1	0	1	0	0	0	0.0109576
9356	734.616	1	0	1	0	0	0	0.010922
9358	734.649	1	0	1	0	0	0	0.0109671
9360	734.682	1	0	1	0	0	0	0.0109586
9362	734.716	1	0	1	0	0	0	0.0109214
9364	734.749	1	0	1	0	0	0	0.0109535
9366	734.782	1	0	1	0	0	0	0.0109099
9368	734.816	1	0	1	0	0	0	0.0109552
9370	734.849	1	0	1	0	0	0	0.0109566
9372	734.882	1	0	1	0	0	0	0.010987
9374	734.916	1	0	1	0	0	0	0.010984
9376	734.949	1	0	1	0	0	0	0.0109891
9378	734.982	1	0	1	0	0	0	0.0109403
9380	735.016	1	0	1	0	0	0	0.0109271
9382	735.049	1	0	1	0	0	0	0.0110046
9384	735.082	1	0	1	0	0	0	0.0109979
9386	735.116	1	0	1	0	0	0	0.0109633
9388	735.149	1	0	1	0	0	0	0.0109962
9390	735.182	1	0	1	0	0	0	0.0109539
9392	735.216	1	0	1	0	0	0	0.011009
9394	735.249	1	0	1	0	0	0	0.011028
9396	735.282	1	0	1	0	0	0	0.0110155
9398	735.316	1	0	1	0	0	0	0.0109786
9400	735.349	1	0	1	0	0	0	0.0110253
9402	735.382	1	0	1	0	0	0	0.0109985
9404	735.416	1	0	1	0	0	0	0.0110297
9406	735.449	1	0	1	0	0	0	0.0110283
9408	735.482	1	0	1	0	0	0	0.0110243
9410	735.516	1	0	1	0	0	0	0.0110317
9412	735.549	1	0	1	0	0	0	0.0110202
9414	735.582	1	0	1	0	0	0	0.011055
9416	735.616	1	0	1	0	0	0	0.0110408
9418	735.649	1	0	1	0	0	0	0.0110056
9420	735.682	1	0	1	0	0	0	0.0110479
9422	735.716	1	0	1	0	0	0	0.0109877
9424	735.749	1	0	1	0	0	0	0.0110039
9426	735.782	1	0	1	0	0	0	0.0109833
9428	735.816	1	0	1	0	0	0	0.0110148
9430	735.849	1	0	1	0	0	0	0.0110364
9432	735.882	1	0	1	0	0	0	0.0110171
9434	735.916	1	0	1	0	0	0	0.0109972
9436	735.949	1	0	1	0	0	0	0.0110236
9438	735.982	1	0	1	0	0	0	0.0110053
9440	736.016	1	0	1	0	0	0	0.0110067
9442	736.049	1	0	1	0	0	0	0.0109884
9444	736.082	1	0	1	0	0	0	0.010962
9446	736.116	1	0	1	0	0	0	0.0110124
9448	736.149	1	0	1	0	0	0	0.0110276
9450	736.182	1	0	1	0	0	0	0.0109965
9452	736.216	1	0	1	0	0	0	0.0109735
9454	736.249	1	0	1	0	0	0	0.0110077
9456	736.282	1	0	1	0	0	0	0.0110253
9458	736.316	1	0	1	0	0	0	0.0110249
9460	736.349	1	0	1	0	0	0	0.0110151
9462	736.382	1	0	1	0	0	0	0.0110138
9464	736.416	1	0	1	0	0	0	0.0109786
9466	736.449	1	0	1	0	0	0	0.0110043
9468	736.482	1	0	1	0	0	0	0.0109657
9470	736.516	1	0	1	0	0	0	0.0109907
9472	736.549	1	0	1	0	0	0	0.0110104
9474	736.582	1	0	1	0	0	0	0.011008
9476	736.616	1	0	1	0	0	0	0.0109775
9478	736.649	1	0	1	0	0	0	0.0109569
9480	736.682	1	0	1	0	0	0	0.0109911
9482	736.716	1	0	1	0	0	0	0.0110182
9484	736.749	1	0	1	0	0	0	0.0109786
9486	736.782	1	0	1	0	0	0	0.0109674
9488	736.816	1	0	1	0	0	0	0.0110053
9490	736.849	1	0	1	0	0	0	0.0109904
9492	736.882	1	0	1	0	0	0	0.0109819
9494	736.916	1	0	1	0	0	0	0.010943
9496	736.949	1	0	1	0	0	0	0.0109847
9498	736.982	1	0	1	0	0	0	0.0109809
9500	737.016	1	0	1	0	0	0	0.0109809
9502	737.049	1	0	1	0	0	0	0.010988
9504	737.082	1	0	1	0	0	0	0.0109992
9506	737.116	1	0	1	0	0	0	0.0109748
9508	737.149	1	0	1	0	0	0	0.0109813
9510	737.182	1	0	1	0	0	0	0.0109566
9512	737.216	1	0	1	0	0	0	0.0109484
9514	737.249	1	0	1	0	0	0	0.0109853
9516	737.282	1	0	1	0	0	0	0.011006
9518	737.316	1	0	1	0	0	0	0.0109853
9520	737.349	1	0	1	0	0	0	0.0110046
9522	737.382	1	0	1	0	0	0	0.0109999
9524	737.416	1	0	1	0	0	0	0.0109691
9526	737.449	1	0	1	0	0	0	0.0109444
9528	737.482	1	0	1	0	0	0	0.0110209
9530	737.516	1	0	1	0	0	0	0.0109305
9532	737.549	1	0	1	0	0	0	0.0109958
9534	737.582	1	0	1	0	0	0	0.0109874
9536	737.616	1	0	1	0	0	0	0.0109921
9538	737.649	1	0	1	0	0	0	0.0109647
9540	737.682	1	0	1	0	0	0	0.0110209
9542	737.716	1	0	1	0	0	0	0.0109992
9544	737.749	1	0	1	0	0	0	0.0110036
9546	737.782	1	0	1	0	0	0	0.0110104
9548	737.816	1	0	1	0	0	0	0.0109413
9550	737.849	1	0	1	0	0	0	0.0110215
9552	737.882	1	0	1	0	0	0	0.0110259
9554	737.916	1	0	1	0	0	0	0.0109725
9556	737.949	1	0	1	0	0	0	0.0109911
9558	737.982	1	0	1	0	0	0	0.0109792
9560	738.016	1	0	1	0	0	0	0.010987
9562	738.049	1	0	1	0	0	0	0.0109688
9564	738.082	1	0	1	0	0	0	0.0109769
9566	738.116	1	0	1	0	0	0	0.0109569
9568	738.149	1	0	1	0	0	0	0.0109572
9570	738.182	1	0	1	0	0	0	0.010984
9572	738.216	1	0	1	0	0	0	0.0109447
9574	738.249	1	0	1	0	0	0	0.0109508
9576	738.282	1	0	1	0	0	0	0.0110192
9578	738.316	1	0	1	0	0	0	0.0109556
9580	738.349	1	0	1	0	0	0	0.0109227
9582	738.382	1	0	1	0	0	0	0.0109945
9584	738.415	1	0	1	0	0	0	0.0109434
9586	738.449	1	0	1	0	0	0	0.0109356
9588	738.482	1	0	1	0	0	0	0.0109525
9590	738.515	1	0	1	0	0	0	0.0109478
9592	738.549	1	0	1	0	0	0	0.0109197
9594	738.582	1	0	1	0	0	0	0.011005
9596	738.615	1	0	1	0	0	0	0.0109637
9598	738.649	1	0	1	0	0	0	0.0109633
9600	738.682	1	0	1	0	0	0	0.0109931
9602	738.715	1	0	1	0	0	0	0.0110178
9604	738.749	1	0	1	0	0	0	0.0110033
9606	738.782	1	0	1	0	0	0	0.0110165
9608	738.815	1	0	1	0	0	0	0.0109918
9610	738.849	1	0	1	0	0	0	0.010984
9612	738.882	1	0	1	0	0	0	0.0109576
9614	738.915	1	0	1	0	0	0	0.0109457
9616	738.949	1	0	1	0	0	0	0.0109941
9618	738.982	1	0	1	0	0	0	0.0109366
9620	739.015	1	0	1	0	0	0	0.0109535
9622	739.049	1	0	1	0	0	0	0.010984
9624	739.082	1	0	1	0	0	0	0.0109281
9626	739.115	1	0	1	0	0	0	0.0109775
9628	739.149	1	0	1	0	0	0	0.0109369
9630	739.182	1	0	1	0	0	0	0.0109759
9632	739.215	1	0	1	0	0	0	0.0109589
9634	739.249	1	0	1	0	0	0	0.010965
9636	739.282	1	0	1	0	0	0	0.0109464
9638	739.315	1	0	1	0	0	0	0.0109444
9640	739.349	1	0	1	0	0	0	0.010986
9642	739.382	1	0	1	0	0	0	0.0109268
9644	739.415	1	0	1	0	0	0	0.0109985
9646	739.449	1	0	1	0	0	0	0.0109809
9648	739.482	1	0	1	0	0	0	0.0109691
9650	739.515	1	0	1	0	0	0	0.0109826
9652	739.549	1	0	1	0	0	0	0.0109566
9654	739.582	1	0	1	0	0	0	0.0110182
9656	739.615	1	0	1	0	0	0	0.0109877
9658	739.649	1	0	1	0	0	0	0.0110073
9660	739.682	1	0	1	0	0	0	0.0110002
9662	739.715	1	0	1	0	0	0	0.0109616
9664	739.749	1	0	1	0	0	0	0.0109877
9666	739.782	1	0	1	0	0	0	0.0109789
9668	739.815	1	0	1	0	0	0	0.0109644
9670	739.849	1	0	1	0	0	0	0.0109799
9672	739.882	1	0	1	0	0	0	0.0109701
9674	739.915	1	0	1	0	0	0	0.0109464
9676	739.949	1	0	1	0	0	0	0.0109603
9678	739.982	1	0	1	0	0	0	0.0109325
9680	740.015	1	0	1	0	0	0	0.0110087
9682	740.049	1	0	1	0	0	0	0.0110212
9684	740.082	1	0	1	0	0	0	0.0109779
9686	740.115	1	0	1	0	0	0	0.0109894
9688	740.149	1	0	1	0	0	0	0.0109315
9690	740.182	1	0	1	0	0	0	0.0109657
9692	740.215	1	0	1	0	0	0	0.010964
9694	740.249	1	0	1	0	0	0	0.0109478
9696	740.282	1	0	1	0	0	0	0.0108943
9698	740.315	1	0	1	0	0	0	0.0109214
9700	740.349	1	0	1	0	0	0	0.0108869
9702	740.382	1	0	1	0	0	0	0.0109244
9704	740.415	1	0	1	0	0	0	0.0109366
9706	740.449	1	0	1	0	0	0	0.0108916
9708	740.482	1	0	1	0	0	0	0.0109559
9710	740.515	1	0	1	0	0	0	0.010963
9712	740.549	1	0	1	0	0	0	0.010876
9714	740.582	1	0	1	0	0	0	0.0109041
9716	740.615	1	0	1	0	0	0	0.010896
9718	740.649	1	0	1	0	0	0	0.010898
9720	740.682	1	0	1	0	0	0	0.0108872
9722	740.715	1	0	1	0	0	0	0.0109295
9724	740.749	1	0	1	0	0	0	0.0108973
9726	740.782	1	0	1	0	0	0	0.0108672
9728	740.815	1	0	1	0	0	0	0.0108916
9730	740.849	1	0	1	0	0	0	0.010917
9732	740.882	1	0	1	0	0	0	0.0108879
9734	740.915	1	0	1	0	0	0	0.0109484
9736	740.949	1	0	1	0	0	0	0.0108821
9738	740.982	1	0	1	0	0	0	0.0109495
9740	741.015	1	0	1	0	0	0	0.010944
9742	741.049	1	0	1	0	0	0	0.0109193
9744	741.082	1	0	1	0	0	0	0.0108862
9746	741.115	1	0	1	0	0	0	0.0109011
9748	741.149	1	0	1	0	0	0	0.0109109
9750	741.182	1	0	1	0	0	0	0.0108767
9752	741.215	1	0	1	0	0	0	0.0109745
9754	741.249	1	0	1	0	0	0	0.0109038
9756	741.282	1	0	1	0	0	0	0.0109014
9758	741.315	1	0	1	0	0	0	0.0108889
9760	741.349	1	0	1	0	0	0	0.0109478
9762	741.382	1	0	1	0	0	0	0.010922
9764	741.415	1	0	1	0	0	0	0.0109075
9766	741.449	1	0	1	0	0	0	0.0109512
9768	741.482	1	0	1	0	0	0	0.0109183
9770	741.515	1	0	1	0	0	0	0.0108743
9772	741.549	1	0	1	0	0	0	0.0108902
9774	741.582	1	0	1	0	0	0	0.0109126
9776	741.615	1	0	1	0	0	0	0.010916
9778	741.649	1	0	1	0	0	0	0.010855
9780	741.682	1	0	1	0	0	0	0.0109007
9782	741.715	1	0	1	0	0	0	0.0109092
9784	741.749	1	0	1	0	0	0	0.0109606
9786	741.782	1	0	1	0	0	0	0.0109278
9788	741.815	1	0	1	0	0	0	0.0109285
9790	741.849	1	0	1	0	0	0	0.0109292
9792	741.882	1	0	1	0	0	0	0.0109061
9794	741.915	1	0	1	0	0	0	0.0109342
9796	741.949	1	0	1	0	0	0	0.0109244
9798	741.982	1	0	1	0	0	0	0.0109085
9800	742.015	1	0	1	0	0	0	0.0108781
9802	742.049	1	0	1	0	0	0	0.0108882
9804	742.082	1	0	1	0	0	0	0.0108415
9806	742.115	1	0	1	0	0	0	0.0108953
9808	742.149	1	0	1	0	0	0	0.0108862
9810	742.182	1	0	1	0	0	0	0.0108709
9812	742.215	1	0	1	0	0	0	0.0108368
9814	742.249	1	0	1	0	0	0	0.0108459
9816	742.282	1	0	1	0	0	0	0.0108784
9818	742.315	1	0	1	0	0	0	0.0108709
9820	742.349	1	0	1	0	0	0	0.0108307
9822	742.382	1	0	1	0	0	0	0.010827
9824	742.415	1	0	1	0	0	0	0.0108134
9826	742.449	1	0	1	0	0	0	0.0108202
9828	742.482	1	0	1	0	0	0	0.010855
9830	742.515	1	0	1	0	0	0	0.0108408
9832	742.549	1	0	1	0	0	0	0.0108791
9834	742.582	1	0	1	0	0	0	0.0108449
9836	742.615	1	0	1	0	0	0	0.0108276
9838	742.649	1	0	1	0	0	0	0.0108858
9840	742.682	1	0	1	0	0	0	0.0108825
9842	742.715	1	0	1	0	0	0	0.010944
9844	742.749	1	0	1	0	0	0	0.0109694
9846	742.782	1	0	1	0	0	0	0.0109444
9848	742.815	1	0	1	0	0	0	0.0109417
9850	742.849	1	0	1	0	0	0	0.0109407
9852	742.882	1	0	1	0	0	0	0.0109346
9854	742.915	1	0	1	0	0	0	0.0109126
9856	742.949	1	0	1	0	0	0	0.0108831
9858	742.982	1	0	1	0	0	0	0.0109089
9860	743.015	1	0	1	0	0	0	0.0109227
9862	743.049	1	0	1	0	0	0	0.0108659
9864	743.082	1	0	1	0	0	0	0.0109258
9866	743.115	1	0	1	0	0	0	0.0109271
9868	743.149	1	0	1	0	0	0	0.0108943
9870	743.182	1	0	1	0	0	0	0.0109129
9872	743.215	1	0	1	0	0	0	0.0109085
9874	743.249	1	0	1	0	0	0	0.0109258
9876	743.282	1	0	1	0	0	0	0.010896
9878	743.315	1	0	1	0	0	0	0.0108831
9880	743.349	1	0	1	0	0	0	0.0109295
9882	743.382	1	0	1	0	0	0	0.010874
9884	743.415	1	0	1	0	0	0	0.0109583
9886	743.449	1	0	1	0	0	0	0.0108848
9888	743.482	1	0	1	0	0	0	0.0109065
9890	743.515	1	0	1	0	0	0	0.0109261
9892	743.549	1	0	1	0	0	0	0.0109396
9894	743.582	1	0	1	0	0	0	0.0109176
9896	743.615	1	0	1	0	0	0	0.0109539
9898	743.649	1	0	1	0	0	0	0.0109339
9900	743.682	1	0	1	0	0	0	0.0109197
9902	743.715	1	0	1	0	0	0	0.0108818
9904	743.749	1	0	1	0	0	0	0.0109542
9906	743.782	1	0	1	0	0	0	0.0109593
9908	743.815	1	0	1	0	0	0	0.0109217
9910	743.849	1	0	1	0	0	0	0.0109045
9912	743.882	1	0	1	0	0	0	0.0109437
9914	743.915	1	0	1	0	0	0	0.0109413
9916	743.949	1	0	1	0	0	0	0.0109254
9918	743.982	1	0	1	0	0	0	0.0109336
9920	744.015	1	0	1	0	0	0	0.010897
9922	744.049	1	0	1	0	0	0	0.0109474
9924	744.082	1	0	1	0	0	0	0.0109349
9926	744.115	1	0	1	0	0	0	0.0109522
9928	744.149	1	0	1	0	0	0	0.0109596
9930	744.182	1	0	1	0	0	0	0.0109579
9932	744.215	1	0	1	0	0	0	0.0109583
9934	744.249	1	0	1	0	0	0	0.010939
9936	744.282	1	0	1	0	0	0	0.0109532
9938	744.315	1	0	1	0	0	0	0.0109319
9940	744.349	1	0	1	0	0	0	0.0109877
9942	744.382	1	0	1	0	0	0	0.0109887
9944	744.415	1	0	1	0	0	0	0.0109478
9946	744.449	1	0	1	0	0	0	0.0109539
9948	744.482	1	0	1	0	0	0	0.0109373
9950	744.515	1	0	1	0	0	0	0.010965
9952	744.549	1	0	1	0	0	0	0.0109755
9954	744.582	1	0	1	0	0	0	0.010963
9956	744.615	1	0	1	0	0	0	0.0109488
9958	744.649	1	0	1	0	0	0	0.0109789
9960	744.682	1	0	1	0	0	0	0.010988
9962	744.715	1	0	1	0	0	0	0.0109738
9964	744.749	1	0	1	0	0	0	0.0109474
9966	744.782	1	0	1	0	0	0	0.0109924
9968	744.815	1	0	1	0	0	0	0.0109813
9970	744.849	1	0	1	0	0	0	0.0109583
9972	744.882	1	0	1	0	0	0	0.0109748
9974	744.915	1	0	1	0	0	0	0.0109874
9976	744.949	1	0	1	0	0	0	0.011008
9978	744.982	1	0	1	0	0	0	0.0110199
9980	745.015	1	0	1	0	0	0	0.0109447
9982	745.049	1	0	1	0	0	0	0.0109938
9984	745.082	1	0	1	0	0	0	0.010987
9986	745.115	1	0	1	0	0	0	0.0109742
9988	745.149	1	0	1	0	0	0	0.0109478
9990	745.182	1	0	1	0	0	0	0.0109792
9992	745.215	1	0	1	0	0	0	0.0109393
9994	745.249	1	0	1	0	0	0	0.0109826
9996	745.282	1	0	1	0	0	0	0.0109735
9998	745.315	1	0	1	0	0	0	0.0110056
10000	745.349	1	0	1	0	0	0	0.010987
10002	745.382	1	0	1	0	0	0	0.0110347
10004	745.415	1	0	1	0	0	0	0.0109515
10006	745.449	1	0	1	0	0	0	0.0109681
10008	745.482	1	0	1	0	0	0	0.0109576
10010	745.515	1	0	1	0	0	0	0.0109891
10012	745.549	1	0	1	0	0	0	0.0109701
10014	745.582	1	0	1	0	0	0	0.0109559
10016	745.615	1	0	1	0	0	0	0.0109792
10018	745.649	1	0	1	0	0	0	0.0109572
10020	745.682	1	0	1	0	0	0	0.0109664
10022	745.715	1	0	1	0	0	0	0.0109701
10024	745.749	1	0	1	0	0	0	0.010944
10026	745.782	1	0	1	0	0	0	0.010962
10028	745.815	1	0	1	0	0	0	0.0109748
10030	745.849	1	0	1	0	0	0	0.0109759
10032	745.882	1	0	1	0	0	0	0.0110094
10034	745.915	1	0	1	0	0	0	0.0109281
10036	745.949	1	0	1	0	0	0	0.0109288
10038	745.982	1	0	1	0	0	0	0.010987
10040	746.015	1	0	1	0	0	0	0.0109765
10042	746.049	1	0	1	0	0	0	0.010964
10044	746.082	1	0	1	0	0	0	0.0109325
10046	746.115	1	0	1	0	0	0	0.0109877
10048	746.149	1	0	1	0	0	0	0.0109674
10050	746.182	1	0	1	0	0	0	0.0109698
10052	746.215	1	0	1	0	0	0	0.0109129
10054	746.249	1	0	1	0	0	0	0.0109308
10056	746.282	1	0	1	0	0	0	0.0109576
10058	746.315	1	0	1	0	0	0	0.0109508
10060	746.349	1	0	1	0	0	0	0.0109295
10062	746.382	1	0	1	0	0	0	0.0109552
10064	746.415	1	0	1	0	0	0	0.0109583
10066	746.449	1	0	1	0	0	0	0.01092
10068	746.482	1	0	1	0	0	0	0.0109667
10070	746.515	1	0	1	0	0	0	0.0109586
10072	746.549	1	0	1	0	0	0	0.0109891
10074	746.582	1	0	1	0	0	0	0.0109173
10076	746.615	1	0	1	0	0	0	0.0109346
10078	746.649	1	0	1	0	0	0	0.0109359
10080	746.682	1	0	1	0	0	0	0.0109386
10082	746.715	1	0	1	0	0	0	0.0109461
10084	746.749	1	0	1	0	0	0	0.0109271
10086	746.782	1	0	1	0	0	0	0.0109549
10088	746.815	1	0	1	0	0	0	0.0109674
10090	746.849	1	0	1	0	0	0	0.0109556
10092	746.882	1	0	1	0	0	0	0.0109627
10094	746.915	1	0	1	0	0	0	0.0109373
10096	746.948	1	0	1	0	0	0	0.0109332
10098	746.982	1	0	1	0	0	0	0.0109556
10100	747.015	1	0	1	0	0	0	0.0109457
10102	747.048	1	0	1	0	0	0	0.0109559
10104	747.082	1	0	1	0	0	0	0.0109732
10106	747.115	1	0	1	0	0	0	0.0109359
10108	747.148	1	0	1	0	0	0	0.0109484
10110	747.182	1	0	1	0	0	0	0.0109532
10112	747.215	1	0	1	0	0	0	0.0109468
10114	747.248	1	0	1	0	0	0	0.010943
10116	747.282	1	0	1	0	0	0	0.0109606
10118	747.315	1	0	1	0	0	0	0.0109505
10120	747.348	1	0	1	0	0	0	0.010939
10122	747.382	1	0	1	0	0	0	0.0109278
10124	747.415	1	0	1	0	0	0	0.0109383
10126	747.448	1	0	1	0	0	0	0.0109261
10128	747.482	1	0	1	0	0	0	0.0109664
10130	747.515	1	0	1	0	0	0	0.0109434
10132	747.548	1	0	1	0	0	0	0.0109112
10134	747.582	1	0	1	0	0	0	0.010943
10136	747.615	1	0	1	0	0	0	0.0109539
10138	747.648	1	0	1	0	0	0	0.0109454
10140	747.682	1	0	1	0	0	0	0.0109045
10142	747.715	1	0	1	0	0	0	0.0109515
10144	747.748	1	0	1	0	0	0	0.0109332
10146	747.782	1	0	1	0	0	0	0.0109738
10148	747.815	1	0	1	0	0	0	0.0109786
10150	747.848	1	0	1	0	0	0	0.0109559
10152	747.882	1	0	1	0	0	0	0.0109484
10154	747.915	1	0	1	0	0	0	0.0109556
10156	747.948	1	0	1	0	0	0	0.0109735
10158	747.982	1	0	1	0	0	0	0.0109417
10160	748.015	1	0	1	0	0	0	0.0109603
10162	748.048	1	0	1	0	0	0	0.0109769
10164	748.082	1	0	1	0	0	0	0.0109796
10166	748.115	1	0	1	0	0	0	0.0109078
10168	748.148	1	0	1	0	0	0	0.0109332
10170	748.182	1	0	1	0	0	0	0.010966
10172	748.215	1	0	1	0	0	0	0.0109386
10174	748.248	1	0	1	0	0	0	0.0109762
10176	748.282	1	0	1	0	0	0	0.0109579
10178	748.315	1	0	1	0	0	0	0.0109505
10180	748.348	1	0	1	0	0	0	0.0109935
10182	748.382	1	0	1	0	0	0	0.010938
10184	748.415	1	0	1	0	0	0	0.0109752
10186	748.448	1	0	1	0	0	0	0.0109207
10188	748.482	1	0	1	0	0	0	0.0109369
10190	748.515	1	0	1	0	0	0	0.010895
10192	748.548	1	0	1	0	0	0	0.0109393
10194	748.582	1	0	1	0	0	0	0.0109396
10196	748.615	1	0	1	0	0	0	0.0109369
10198	748.648	1	0	1	0	0	0	0.0109454
10200	748.682	1	0	1	0	0	0	0.0109407
10202	748.715	1	0	1	0	0	0	0.0109234
10204	748.748	1	0	1	0	0	0	0.0109508
10206	748.782	1	0	1	0	0	0	0.0109613
10208	748.815	1	0	1	0	0	0	0.0109803
10210	748.848	1	0	1	0	0	0	0.0109935
10212	748.882	1	0	1	0	0	0	0.0109657
10214	748.915	1	0	1	0	0	0	0.010897
10216	748.948	1	0	1	0	0	0	0.0109258
10218	748.982	1	0	1	0	0	0	0.0109515
10220	749.015	1	0	1	0	0	0	0.0109491
10222	749.048	1	0	1	0	0	0	0.0109501
10224	749.082	1	0	1	0	0	0	0.0109227
10226	749.115	1	0	1	0	0	0	0.0109292
10228	749.148	1	0	1	0	0	0	0.0109322
10230	749.182	1	0	1	0	0	0	0.0109451
10232	749.215	1	0	1	0	0	0	0.0109312
10234	749.248	1	0	1	0	0	0	0.0109244
10236	749.282	1	0	1	0	0	0	0.0108946
10238	749.315	1	0	1	0	0	0	0.0108557
10240	749.348	1	0	1	0	0	0	0.0109407
10242	749.382	1	0	1	0	0	0	0.0109217
10244	749.415	1	0	1	0	0	0	0.0109891
10246	749.448	1	0	1	0	0	0	0.0109796
10248	749.482	1	0	1	0	0	0	0.0109329
10250	749.515	1	0	1	0	0	0	0.0109281
10252	749.548	1	0	1	0	0	0	0.0108943
10254	749.582	1	0	1	0	0	0	0.0109464
10256	749.615	1	0	1	0	0	0	0.0109292
10258	749.648	1	0	1	0	0	0	0.010898
10260	749.682	1	0	1	0	0	0	0.0109176
10262	749.715	1	0	1	0	0	0	0.0109204
10264	749.748	1	0	1	0	0	0	0.0109596
10266	749.782	1	0	1	0	0	0	0.0110243
10268	749.815	1	0	1	0	0	0	0.0109461
10270	749.848	1	0	1	0	0	0	0.0109698
10272	749.882	1	0	1	0	0	0	0.0109268
10274	749.915	1	0	1	0	0	0	0.0109325
10276	749.948	1	0	1	0	0	0	0.0109688
10278	749.982	1	0	1	0	0	0	0.0108946
10280	750.015	1	0	1	0	0	0	0.0109755
10282	750.048	1	0	1	0	0	0	0.0109308
10284	750.082	1	0	1	0	0	0	0.0109508
10286	750.115	1	0	1	0	0	0	0.0109718
10288	750.148	1	0	1	0	0	0	0.0109667
10290	750.182	1	0	1	0	0	0	0.010921
10292	750.215	1	0	1	0	0	0	0.0109258
10294	750.248	1	0	1	0	0	0	0.0109346
10296	750.282	1	0	1	0	0	0	0.0108733
10298	750.315	1	0	1	0	0	0	0.0108825
10300	750.348	1	0	1	0	0	0	0.0109109
10302	750.382	1	0	1	0	0	0	0.0109038
10304	750.415	1	0	1	0	0	0	0.0108676
10306	750.448	1	0	1	0	0	0	0.0108192
10308	750.482	1	0	1	0	0	0	0.0108916
10310	750.515	1	0	1	0	0	0	0.0108378
10312	750.548	1	0	1	0	0	0	0.0108672
10314	750.582	1	0	1	0	0	0	0.0108818
10316	750.615	1	0	1	0	0	0	0.0108987
10318	750.648	1	0	1	0	0	0	0.0108747
10320	750.682	1	0	1	0	0	0	0.010872
10322	750.715	1	0	1	0	0	0	0.0108649
10324	750.748	1	0	1	0	0	0	0.0108862
10326	750.782	1	0	1	0	0	0	0.0108957
10328	750.815	1	0	1	0	0	0	0.0108479
10330	750.848	1	0	1	0	0	0	0.0108726
10332	750.882	1	0	1	0	0	0	0.01081
10334	750.915	1	0	1	0	0	0	0.0107819
10336	750.948	1	0	1	0	0	0	0.0108083
10338	750.982	1	0	1	0	0	0	0.0107894
10340	751.015	1	0	1	0	0	0	0.0108056
10342	751.048	1	0	1	0	0	0	0.0108618
10344	751.082	1	0	1	0	0	0	0.0108578
10346	751.115	1	0	1	0	0	0	0.010921
10348	751.148	1	0	1	0	0	0	0.0108689
10350	751.182	1	0	1	0	0	0	0.0108364
10352	751.215	1	0	1	0	0	0	0.0108875
10354	751.248	1	0	1	0	0	0	0.0108202
10356	751.282	1	0	1	0	0	0	0.0108561
10358	751.315	1	0	1	0	0	0	0.0108706
10360	751.348	1	0	1	0	0	0	0.0108885
10362	751.382	1	0	1	0	0	0	0.0108767
10364	751.415	1	0	1	0	0	0	0.0108517
10366	751.448	1	0	1	0	0	0	0.0108831
10368	751.482	1	0	1	0	0	0	0.0108977
10370	751.515	1	0	1	0	0	0	0.0109011
10372	751.548	1	0	1	0	0	0	0.0109264
10374	751.582	1	0	1	0	0	0	0.0108777
10376	751.615	1	0	1	0	0	0	0.0108686
10378	751.648	1	0	1	0	0	0	0.0108726
10380	751.682	1	0	1	0	0	0	0.0108635
10382	751.715	1	0	1	0	0	0	0.0108324
10384	751.748	1	0	1	0	0	0	0.0107948
10386	751.782	1	0	1	0	0	0	0.0108852
10388	751.815	1	0	1	0	0	0	0.0108649
10390	751.848	1	0	1	0	0	0	0.0108845
10392	751.882	1	0	1	0	0	0	0.0108408
10394	751.915	1	0	1	0	0	0	0.0108821
10396	751.948	1	0	1	0	0	0	0.0108584
10398	751.982	1	0	1	0	0	0	0.0108781
10400	752.015	1	0	1	0	0	0	0.0108354
10402	752.048	1	0	1	0	0	0	0.0108334
10404	752.082	1	0	1	0	0	0	0.0108638
10406	752.115	1	0	1	0	0	0	0.010849
10408	752.148	1	0	1	0	0	0	0.0108141
10410	752.182	1	0	1	0	0	0	0.0108141
10412	752.215	1	0	1	0	0	0	0.01074
10414	752.248	1	0	1	0	0	0	0.0108182
10416	752.282	1	0	1	0	0	0	0.0108202
10418	752.315	1	0	1	0	0	0	0.010854
10420	752.348	1	0	1	0	0	0	0.0108033
10422	752.382	1	0	1	0	0	0	0.0107965
10424	752.415	1	0	1	0	0	0	0.0107731
10426	752.448	1	0	1	0	0	0	0.0108114
10428	752.482	1	0	1	0	0	0	0.0108378
10430	752.515	1	0	1	0	0	0	0.0108256
10432	752.548	1	0	1	0	0	0	0.0108875
10434	752.582	1	0	1	0	0	0	0.0108601
10436	752.615	1	0	1	0	0	0	0.0108456
10438	752.648	1	0	1	0	0	0	0.0108659
10440	752.682	1	0	1	0	0	0	0.0108361
10442	752.715	1	0	1	0	0	0	0.0108689
10444	752.748	1	0	1	0	0	0	0.0108327
10446	752.782	1	0	1	0	0	0	0.0108804
10448	752.815	1	0	1	0	0	0	0.010829
10450	752.848	1	0	1	0	0	0	0.0108632
10452	752.882	1	0	1	0	0	0	0.0108317
10454	752.915	1	0	1	0	0	0	0.0108625
10456	752.948	1	0	1	0	0	0	0.0108621
10458	752.982	1	0	1	0	0	0	0.0108953
10460	753.015	1	0	1	0	0	0	0.0108699
10462	753.048	1	0	1	0	0	0	0.0108591
10464	753.082	1	0	1	0	0	0	0.0108967
10466	753.115	1	0	1	0	0	0	0.0107877
10468	753.148	1	0	1	0	0	0	0.0107694
10470	753.182	1	0	1	0	0	0	0.0107962
10472	753.215	1	0	1	0	0	0	0.0108266
10474	753.248	1	0	1	0	0	0	0.0108198
10476	753.282	1	0	1	0	0	0	0.0108459
10478	753.315	1	0	1	0	0	0	0.0108063
10480	753.348	1	0	1	0	0	0	0.0108178
10482	753.382	1	0	1	0	0	0	0.0108046
10484	753.415	1	0	1	0	0	0	0.010809
10486	753.448	1	0	1	0	0	0	0.0107968
10488	753.482	1	0	1	0	0	0	0.010851
10490	753.515	1	0	1	0	0	0	0.0108195
10492	753.548	1	0	1	0	0	0	0.0108158
10494	753.582	1	0	1	0	0	0	0.0108693
10496	753.615	1	0	1	0	0	0	0.010811
10498	753.648	1	0	1	0	0	0	0.0108381
10500	753.682	1	0	1	0	0	0	0.0108534
10502	753.715	1	0	1	0	0	0	0.0107928
10504	753.748	1	0	1	0	0	0	0.0108347
10506	753.782	1	0	1	0	0	0	0.0108053
10508	753.815	1	0	1	0	0	0	0.0108276
10510	753.848	1	0	1	0	0	0	0.0107941
10512	753.882	1	0	1	0	0	0	0.0108134
10514	753.915	1	0	1	0	0	0	0.0107731
10516	753.948	1	0	1	0	0	0	0.0108029
10518	753.982	1	0	1	0	0	0	0.0108209
10520	754.015	1	0	1	0	0	0	0.0107836
10522	754.048	1	0	1	0	0	0	0.0107938
10524	754.082	1	0	1	0	0	0	0.0108358
10526	754.115	1	0	1	0	0	0	0.0108473
10528	754.148	1	0	1	0	0	0	0.0108012
10530	754.182	1	0	1	0	0	0	0.0108611
10532	754.215	1	0	1	0	0	0	0.0108605
10534	754.248	1	0	1	0	0	0	0.0108286
10536	754.282	1	0	1	0	0	0	0.0108476
10538	754.315	1	0	1	0	0	0	0.0108148
10540	754.348	1	0	1	0	0	0	0.0108757
10542	754.382	1	0	1	0	0	0	0.0108706
10544	754.415	1	0	1	0	0	0	0.0108469
10546	754.448	1	0	1	0	0	0	0.0108337
10548	754.482	1	0	1	0	0	0	0.0108747
10550	754.515	1	0	1	0	0	0	0.0108845
10552	754.548	1	0	1	0	0	0	0.010873
10554	754.582	1	0	1	0	0	0	0.0108797
10556	754.615	1	0	1	0	0	0	0.0109166
10558	754.648	1	0	1	0	0	0	0.0108442
10560	754.682	1	0	1	0	0	0	0.0108574
10562	754.715	1	0	1	0	0	0	0.0108479
10564	754.748	1	0	1	0	0	0	0.0108368
10566	754.782	1	0	1	0	0	0	0.0108672
10568	754.815	1	0	1	0	0	0	0.0108733
10570	754.848	1	0	1	0	0	0	0.0108547
10572	754.882	1	0	1	0	0	0	0.0108913
10574	754.915	1	0	1	0	0	0	0.0108429
10576	754.948	1	0	1	0	0	0	0.0108435
10578	754.982	1	0	1	0	0	0	0.0108801
10580	755.015	1	0	1	0	0	0	0.0108439
10582	755.048	1	0	1	0	0	0	0.0108581
10584	755.082	1	0	1	0	0	0	0.0108879
10586	755.115	1	0	1	0	0	0	0.0108334
10588	755.148	1	0	1	0	0	0	0.010872
10590	755.182	1	0	1	0	0	0	0.0109055
10592	755.215	1	0	1	0	0	0	0.0108709
10594	755.248	1	0	1	0	0	0	0.0108564
10596	755.282	1	0	1	0	0	0	0.0108977
10598	755.315	1	0	1	0	0	0	0.0109163
10600	755.348	1	0	1	0	0	0	0.0108418
10602	755.382	1	0	1	0	0	0	0.0108825
10604	755.415	1	0	1	0	0	0	0.0108493
10606	755.448	1	0	1	0	0	0	0.0108828
10608	755.481	1	0	1	0	0	0	0.0108791
10610	755.515	1	0	1	0	0	0	0.0108987
10612	755.548	1	0	1	0	0	0	0.0109045
10614	755.581	1	0	1	0	0	0	0.0108672
10616	755.615	1	0	1	0	0	0	0.010876
10618	755.648	1	0	1	0	0	0	0.0108967
10620	755.681	1	0	1	0	0	0	0.0108957
10622	755.715	1	0	1	0	0	0	0.0108869
10624	755.748	1	0	1	0	0	0	0.0108638
10626	755.781	1	0	1	0	0	0	0.0108787
10628	755.815	1	0	1	0	0	0	0.0108422
10630	755.848	1	0	1	0	0	0	0.0108232
10632	755.881	1	0	1	0	0	0	0.0108415
10634	755.915	1	0	1	0	0	0	0.0109041
10636	755.948	1	0	1	0	0	0	0.0108919
10638	755.981	1	0	1	0	0	0	0.0108418
10640	756.015	1	0	1	0	0	0	0.0108659
10642	756.048	1	0	1	0	0	0	0.0108781
10644	756.081	1	0	1	0	0	0	0.0108107
10646	756.115	1	0	1	0	0	0	0.010827
10648	756.148	1	0	1	0	0	0	0.0108655
10650	756.181	1	0	1	0	0	0	0.0108381
10652	756.215	1	0	1	0	0	0	0.0108215
10654	756.248	1	0	1	0	0	0	0.0108882
10656	756.281	1	0	1	0	0	0	0.0108368
10658	756.315	1	0	1	0	0	0	0.010873
10660	756.348	1	0	1	0	0	0	0.0108652
10662	756.381	1	0	1	0	0	0	0.0108682
10664	756.415	1	0	1	0	0	0	0.0109241
10666	756.448	1	0	1	0	0	0	0.0108946
10668	756.481	1	0	1	0	0	0	0.0108686
10670	756.515	1	0	1	0	0	0	0.0108713
10672	756.548	1	0	1	0	0	0	0.0108608
10674	756.581	1	0	1	0	0	0	0.0108517
10676	756.615	1	0	1	0	0	0	0.0108385
10678	756.648	1	0	1	0	0	0	0.0109126
10680	756.681	1	0	1	0	0	0	0.0109126
10682	756.715	1	0	1	0	0	0	0.0109011
10684	756.748	1	0	1	0	0	0	0.0108967
10686	756.781	1	0	1	0	0	0	0.0109024
10688	756.815	1	0	1	0	0	0	0.0108517
10690	756.848	1	0	1	0	0	0	0.0108872
10692	756.881	1	0	1	0	0	0	0.0108723
10694	756.915	1	0	1	0	0	0	0.0108869
10696	756.948	1	0	1	0	0	0	0.0108804
10698	756.981	1	0	1	0	0	0	0.0109085
10700	757.015	1	0	1	0	0	0	0.0108797
10702	757.048	1	0	1	0	0	0	0.0108953
10704	757.081	1	0	1	0	0	0	0.0108456
10706	757.115	1	0	1	0	0	0	0.0108825
10708	757.148	1	0	1	0	0	0	0.010853
10710	757.181	1	0	1	0	0	0	0.0108371
10712	757.215	1	0	1	0	0	0	0.010852
10714	757.248	1	0	1	0	0	0	0.0108154
10716	757.281	1	0	1	0	0	0	0.010897
10718	757.315	1	0	1	0	0	0	0.0108002
10720	757.348	1	0	1	0	0	0	0.010875
10722	757.381	1	0	1	0	0	0	0.0108713
10724	757.415	1	0	1	0	0	0	0.0108022
10726	757.448	1	0	1	0	0	0	0.0107972
10728	757.481	1	0	1	0	0	0	0.0108314
10730	757.515	1	0	1	0	0	0	0.0108016
10732	757.548	1	0	1	0	0	0	0.0108601
10734	757.581	1	0	1	0	0	0	0.0108351
10736	757.615	1	0	1	0	0	0	0.0108283
10738	757.648	1	0	1	0	0	0	0.0108127
10740	757.681	1	0	1	0	0	0	0.01083
10742	757.715	1	0	1	0	0	0	0.0108192
10744	757.748	1	0	1	0	0	0	0.0108097
10746	757.781	1	0	1	0	0	0	0.0108435
10748	757.815	1	0	1	0	0	0	0.0108605
10750	757.848	1	0	1	0	0	0	0.0107972
10752	757.881	1	0	1	0	0	0	0.0108087
10754	757.915	1	0	1	0	0	0	0.0108209
10756	757.948	1	0	1	0	0	0	0.0108672
10758	757.981	1	0	1	0	0	0	0.0108246
10760	758.015	1	0	1	0	0	0	0.0108605
10762	758.048	1	0	1	0	0	0	0.0108171
10764	758.081	1	0	1	0	0	0	0.0108374
10766	758.115	1	0	1	0	0	0	0.0108043
10768	758.148	1	0	1	0	0	0	0.0108026
10770	758.181	1	0	1	0	0	0	0.0107968
10772	758.215	1	0	1	0	0	0	0.0108263
10774	758.248	1	0	1	0	0	0	0.0108259
10776	758.281	1	0	1	0	0	0	0.0107809
10778	758.315	1	0	1	0	0	0	0.0108104
10780	758.348	1	0	1	0	0	0	0.0108124
10782	758.381	1	0	1	0	0	0	0.0108608
10784	758.415	1	0	1	0	0	0	0.0108273
10786	758.448	1	0	1	0	0	0	0.0108222
10788	758.481	1	0	1	0	0	0	0.0108645
10790	758.515	1	0	1	0	0	0	0.0108385
10792	758.548	1	0	1	0	0	0	0.0108246
10794	758.581	1	0	1	0	0	0	0.0108127
10796	758.615	1	0	1	0	0	0	0.010851
10798	758.648	1	0	1	0	0	0	0.0109149
10800	758.681	1	0	1	0	0	0	0.0108821
10802	758.715	1	0	1	0	0	0	0.0108946
10804	758.748	1	0	1	0	0	0	0.0108205
10806	758.781	1	0	1	0	0	0	0.0108344
10808	758.815	1	0	1	0	0	0	0.0108429
10810	758.848	1	0	1	0	0	0	0.0108686
10812	758.881	1	0	1	0	0	0	0.0107975
10814	758.915	1	0	1	0	0	0	0.0108192
10816	758.948	1	0	1	0	0	0	0.0108385
10818	758.981	1	0	1	0	0	0	0.0108395
10820	759.015	1	0	1	0	0	0	0.0108391
10822	759.048	1	0	1	0	0	0	0.0108334
10824	759.081	1	0	1	0	0	0	0.0108286
10826	759.115	1	0	1	0	0	0	0.0108307
10828	759.148	1	0	1	0	0	0	0.0108523
10830	759.181	1	0	1	0	0	0	0.0108537
10832	759.215	1	0	1	0	0	0	0.0108297
10834	759.248	1	0	1	0	0	0	0.0108242
10836	759.281	1	0	1	0	0	0	0.010827
10838	759.315	1	0	1	0	0	0	0.0107995
10840	759.348	1	0	1	0	0	0	0.0108496
10842	759.381	1	0	1	0	0	0	0.0108165
10844	759.415	1	0	1	0	0	0	0.0107989
10846	759.448	1	0	1	0	0	0	0.0108314
10848	759.481	1	0	1	0	0	0	0.0108395
10850	759.515	1	0	1	0	0	0	0.0108219
10852	759.548	1	0	1	0	0	0	0.0108097
10854	759.581	1	0	1	0	0	0	0.0108862
10856	759.615	1	0	1	0	0	0	0.0108699
10858	759.648	1	0	1	0	0	0	0.0108418
10860	759.681	1	0	1	0	0	0	0.0108615
10862	759.715	1	0	1	0	0	0	0.0108361
10864	759.748	1	0	1	0	0	0	0.0108693
10866	759.781	1	0	1	0	0	0	0.0109004
10868	759.815	1	0	1	0	0	0	0.0108642
10870	759.848	1	0	1	0	0	0	0.0108459
10872	759.881	1	0	1	0	0	0	0.0108391
10874	759.915	1	0	1	0	0	0	0.010877
10876	759.948	1	0	1	0	0	0	0.0108483
10878	759.981	1	0	1	0	0	0	0.0108591
10880	760.015	1	0	1	0	0	0	0.0108381
10882	760.048	1	0	1	0	0	0	0.0108354
10884	760.081	1	0	1	0	0	0	0.0108188
10886	760.115	1	0	1	0	0	0	0.0108635
10888	760.148	1	0	1	0	0	0	0.010872
10890	760.181	1	0	1	0	0	0	0.0108391
10892	760.215	1	0	1	0	0	0	0.0108303
10894	760.248	1	0	1	0	0	0	0.0108496
10896	760.281	1	0	1	0	0	0	0.0108378
10898	760.315	1	0	1	0	0	0	0.01085
10900	760.348	1	0	1	0	0	0	0.0108374
10902	760.381	1	0	1	0	0	0	0.0108466
10904	760.415	1	0	1	0	0	0	0.0108347
10906	760.448	1	0	1	0	0	0	0.0108266
10908	760.481	1	0	1	0	0	0	0.010833
10910	760.515	1	0	1	0	0	0	0.0108303
10912	760.548	1	0	1	0	0	0	0.0108327
10914	760.581	1	0	1	0	0	0	0.0108354
10916	760.615	1	0	1	0	0	0	0.0108869
10918	760.648	1	0	1	0	0	0	0.0108594
10920	760.681	1	0	1	0	0	0	0.0108391
10922	760.715	1	0	1	0	0	0	0.0108395
10924	760.748	1	0	1	0	0	0	0.0108591
10926	760.781	1	0	1	0	0	0	0.0108787
10928	760.815	1	0	1	0	0	0	0.0108226
10930	760.848	1	0	1	0	0	0	0.0108412
10932	760.881	1	0	1	0	0	0	0.0108171
10934	760.915	1	0	1	0	0	0	0.0108794
10936	760.948	1	0	1	0	0	0	0.0108466
10938	760.981	1	0	1	0	0	0	0.0108672
10940	761.015	1	0	1	0	0	0	0.0108679
10942	761.048	1	0	1	0	0	0	0.0108588
10944	761.081	1	0	1	0	0	0	0.0108354
10946	761.115	1	0	1	0	0	0	0.0108368
10948	761.148	1	0	1	0	0	0	0.0108297
10950	761.181	1	0	1	0	0	0	0.0108337
10952	761.215	1	0	1	0	0	0	0.010831
10954	761.248	1	0	1	0	0	0	0.0108456
10956	761.281	1	0	1	0	0	0	0.0108588
10958	761.315	1	0	1	0	0	0	0.0108429
10960	761.348	1	0	1	0	0	0	0.0108452
10962	761.381	1	0	1	0	0	0	0.0108446
10964	761.415	1	0	1	0	0	0	0.0108716
10966	761.448	1	0	1	0	0	0	0.0108737
10968	761.481	1	0	1	0	0	0	0.0108449
10970	761.515	1	0	1	0	0	0	0.0108527
10972	761.548	1	0	1	0	0	0	0.0108479
10974	761.581	1	0	1	0	0	0	0.0108804
10976	761.615	1	0	1	0	0	0	0.0108743
10978	761.648	1	0	1	0	0	0	0.0108483
10980	761.681	1	0	1	0	0	0	0.0108388
10982	761.715	1	0	1	0	0	0	0.0108841
10984	761.748	1	0	1	0	0	0	0.0108479
10986	761.781	1	0	1	0	0	0	0.0108314
10988	761.815	1	0	1	0	0	0	0.0108222
10990	761.848	1	0	1	0	0	0	0.0107938
10992	761.881	1	0	1	0	0	0	0.0108385
10994	761.915	1	0	1	0	0	0	0.0108239
10996	761.948	1	0	1	0	0	0	0.0108398
10998	761.981	1	0	1	0	0	0	0.0108249
11000	762.015	1	0	1	0	0	0	0.0108716
11002	762.048	1	0	1	0	0	0	0.0108422
11004	762.081	1	0	1	0	0	0	0.0108222
11006	762.115	1	0	1	0	0	0	0.0108094
11008	762.148	1	0	1	0	0	0	0.0108063
11010	762.181	1	0	1	0	0	0	0.0108198
11012	762.215	1	0	1	0	0	0	0.0108621
11014	762.248	1	0	1	0	0	0	0.010874
11016	762.281	1	0	1	0	0	0	0.0108209
11018	762.315	1	0	1	0	0	0	0.0107775
11020	762.348	1	0	1	0	0	0	0.0108192
11022	762.381	1	0	1	0	0	0	0.0108236
11024	762.415	1	0	1	0	0	0	0.0108425
11026	762.448	1	0	1	0	0	0	0.0108588
11028	762.481	1	0	1	0	0	0	0.01081
11030	762.515	1	0	1	0	0	0	0.0108422
11032	762.548	1	0	1	0	0	0	0.01083
11034	762.581	1	0	1	0	0	0	0.0108229
11036	762.615	1	0	1	0	0	0	0.010831
11038	762.648	1	0	1	0	0	0	0.0107728
11040	762.681	1	0	1	0	0	0	0.0108161
11042	762.715	1	0	1	0	0	0	0.0108368
11044	762.748	1	0	1	0	0	0	0.0108226
11046	762.781	1	0	1	0	0	0	0.010831
11048	762.815	1	0	1	0	0	0	0.010832
11050	762.848	1	0	1	0	0	0	0.0108273
11052	762.881	1	0	1	0	0	0	0.010828
11054	762.915	1	0	1	0	0	0	0.0107904
11056	762.948	1	0	1	0	0	0	0.010828
11058	762.981	1	0	1	0	0	0	0.0108083
11060	763.015	1	0	1	0	0	0	0.0107711
11062	763.048	1	0	1	0	0	0	0.0107955
11064	763.081	1	0	1	0	0	0	0.0108056
11066	763.114	1	0	1	0	0	0	0.0107948
11068	763.148	1	0	1	0	0	0	0.0107687
11070	763.181	1	0	1	0	0	0	0.0107701
11072	763.214	1	0	1	0	0	0	0.0107955
11074	763.248	1	0	1	0	0	0	0.0107989
11076	763.281	1	0	1	0	0	0	0.0108019
11078	763.314	1	0	1	0	0	0	0.0108097
11080	763.348	1	0	1	0	0	0	0.010805
11082	763.381	1	0	1	0	0	0	0.0108039
11084	763.414	1	0	1	0	0	0	0.0107874
11086	763.448	1	0	1	0	0	0	0.0107599
11088	763.481	1	0	1	0	0	0	0.0107975
11090	763.514	1	0	1	0	0	0	0.0107647
11092	763.548	1	0	1	0	0	0	0.0107342
11094	763.581	1	0	1	0	0	0	0.0107478
11096	763.614	1	0	1	0	0	0	0.0107183
11098	763.648	1	0	1	0	0	0	0.0107528
11100	763.681	1	0	1	0	0	0	0.0107173
11102	763.714	1	0	1	0	0	0	0.0107535
11104	763.748	1	0	1	0	0	0	0.0107292
11106	763.781	1	0	1	0	0	0	0.0107092
11108	763.814	1	0	1	0	0	0	0.0107762
11110	763.848	1	0	1	0	0	0	0.0107325
11112	763.881	1	0	1	0	0	0	0.0107004
11114	763.914	1	0	1	0	0	0	0.0107579
11116	763.948	1	0	1	0	0	0	0.0107332
11118	763.981	1	0	1	0	0	0	0.0106933
11120	764.014	1	0	1	0	0	0	0.0106841
[truncated: 34,162 more rows]

## Sheet: Mouse 3_470 Signal
FrameCounter	Timestamp	LedState	Stimulation	Output0	Output1	Input0	Input1	Region0G
7123	697.4	2	0	1	0	0	0	0.0129664
7125	697.434	2	0	1	0	0	0	0.0130375
7127	697.467	2	0	1	0	0	0	0.0129952
7129	697.5	2	0	1	0	0	0	0.0130131
7131	697.534	2	0	1	0	0	0	0.0130341
7133	697.567	2	0	1	0	0	0	0.0130615
7135	697.6	2	0	1	0	0	0	0.0130331
7137	697.634	2	0	1	0	0	0	0.0130182
7139	697.667	2	0	1	0	0	0	0.0129742
7141	697.7	2	0	1	0	0	0	0.0130074
7143	697.734	2	0	1	0	0	0	0.0130047
7145	697.767	2	0	1	0	0	0	0.0129915
7147	697.8	2	0	1	0	0	0	0.0129999
7149	697.834	2	0	1	0	0	0	0.0130097
7151	697.867	2	0	1	0	0	0	0.0130534
7153	697.9	2	0	1	0	0	0	0.0130094
7155	697.934	2	0	1	0	0	0	0.0130036
7157	697.967	2	0	1	0	0	0	0.0129945
7159	698	2	0	1	0	0	0	0.0130219
7161	698.034	2	0	1	0	0	0	0.0130392
7163	698.067	2	0	1	0	0	0	0.0130057
7165	698.1	2	0	1	0	0	0	0.0130023
7167	698.134	2	0	1	0	0	0	0.013074
7169	698.167	2	0	1	0	0	0	0.0129881
7171	698.2	2	0	1	0	0	0	0.0130209
7173	698.234	2	0	1	0	0	0	0.0130053
7175	698.267	2	0	1	0	0	0	0.0130534
7177	698.3	2	0	1	0	0	0	0.0130243
7179	698.334	2	0	1	0	0	0	0.013026
7181	698.367	2	0	1	0	0	0	0.0130307
7183	698.4	2	0	1	0	0	0	0.0129942
7185	698.434	2	0	1	0	0	0	0.013028
7187	698.467	2	0	1	0	0	0	0.0129965
7189	698.5	2	0	1	0	0	0	0.013007
7191	698.534	2	0	1	0	0	0	0.0129671
7193	698.567	2	0	1	0	0	0	0.0130141
7195	698.6	2	0	1	0	0	0	0.012919
7197	698.634	2	0	1	0	0	0	0.0129745
7199	698.667	2	0	1	0	0	0	0.0129262
7201	698.7	2	0	1	0	0	0	0.0129613
7203	698.734	2	0	1	0	0	0	0.0129146
7205	698.767	2	0	1	0	0	0	0.0129163
7207	698.8	2	0	1	0	0	0	0.0129092
7209	698.834	2	0	1	0	0	0	0.0129309
7211	698.867	2	0	1	0	0	0	0.0129126
7213	698.9	2	0	1	0	0	0	0.0129187
7215	698.934	2	0	1	0	0	0	0.0129397
7217	698.967	2	0	1	0	0	0	0.0129241
7219	699	2	0	1	0	0	0	0.0129492
7221	699.034	2	0	1	0	0	0	0.0129732
7223	699.067	2	0	1	0	0	0	0.0129566
7225	699.1	2	0	1	0	0	0	0.0129603
7227	699.134	2	0	1	0	0	0	0.0129908
7229	699.167	2	0	1	0	0	0	0.013007
7231	699.2	2	0	1	0	0	0	0.0129992
7233	699.234	2	0	1	0	0	0	0.0130179
7235	699.267	2	0	1	0	0	0	0.0130108
7237	699.3	2	0	1	0	0	0	0.0130216
7239	699.334	2	0	1	0	0	0	0.0129877
7241	699.367	2	0	1	0	0	0	0.0130036
7243	699.4	2	0	1	0	0	0	0.0129498
7245	699.434	2	0	1	0	0	0	0.0130219
7247	699.467	2	0	1	0	0	0	0.0129877
7249	699.5	2	0	1	0	0	0	0.0130358
7251	699.534	2	0	1	0	0	0	0.0130656
7253	699.567	2	0	1	0	0	0	0.0130311
7255	699.6	2	0	1	0	0	0	0.0131015
7257	699.634	2	0	1	0	0	0	0.0131018
7259	699.667	2	0	1	0	0	0	0.0130449
7261	699.7	2	0	1	0	0	0	0.0130808
7263	699.734	2	0	1	0	0	0	0.013073
7265	699.767	2	0	1	0	0	0	0.0130534
7267	699.8	2	0	1	0	0	0	0.0130446
7269	699.834	2	0	1	0	0	0	0.0130189
7271	699.867	2	0	1	0	0	0	0.0130372
7273	699.9	2	0	1	0	0	0	0.0130761
7275	699.934	2	0	1	0	0	0	0.013003
7277	699.967	2	0	1	0	0	0	0.0130317
7279	700	2	0	1	0	0	0	0.013028
7281	700.034	2	0	1	0	0	0	0.0129959
7283	700.067	2	0	1	0	0	0	0.0130175
7285	700.1	2	0	1	0	0	0	0.0130358
7287	700.134	2	0	1	0	0	0	0.0129756
7289	700.167	2	0	1	0	0	0	0.0129502
7291	700.2	2	0	1	0	0	0	0.0130026
7293	700.234	2	0	1	0	0	0	0.0130091
7295	700.267	2	0	1	0	0	0	0.0130043
7297	700.3	2	0	1	0	0	0	0.013008
7299	700.334	2	0	1	0	0	0	0.0130162
7301	700.367	2	0	1	0	0	0	0.0130855
7303	700.4	2	0	1	0	0	0	0.0130331
7305	700.434	2	0	1	0	0	0	0.0130426
7307	700.467	2	0	1	0	0	0	0.013049
7309	700.5	2	0	1	0	0	0	0.0130463
7311	700.534	2	0	1	0	0	0	0.0131025
7313	700.567	2	0	1	0	0	0	0.0130612
7315	700.6	2	0	1	0	0	0	0.0130405
7317	700.634	2	0	1	0	0	0	0.0130243
7319	700.667	2	0	1	0	0	0	0.0130744
7321	700.7	2	0	1	0	0	0	0.0130355
7323	700.734	2	0	1	0	0	0	0.0130101
7325	700.767	2	0	1	0	0	0	0.0130358
7327	700.8	2	0	1	0	0	0	0.0130135
7329	700.834	2	0	1	0	0	0	0.0130297
7331	700.867	2	0	1	0	0	0	0.0130656
7333	700.9	2	0	1	0	0	0	0.0130497
7335	700.934	2	0	1	0	0	0	0.0130043
7337	700.967	2	0	1	0	0	0	0.0130077
7339	701	2	0	1	0	0	0	0.0130598
7341	701.034	2	0	1	0	0	0	0.012985
7343	701.067	2	0	1	0	0	0	0.0130294
7345	701.1	2	0	1	0	0	0	0.0129847
7347	701.134	2	0	1	0	0	0	0.0129546
7349	701.167	2	0	1	0	0	0	0.0129817
7351	701.2	2	0	1	0	0	0	0.0130087
7353	701.234	2	0	1	0	0	0	0.0130189
7355	701.267	2	0	1	0	0	0	0.0129979
7357	701.3	2	0	1	0	0	0	0.0129918
7359	701.334	2	0	1	0	0	0	0.0130087
7361	701.367	2	0	1	0	0	0	0.0130097
7363	701.4	2	0	1	0	0	0	0.0129861
7365	701.434	2	0	1	0	0	0	0.0130236
7367	701.467	2	0	1	0	0	0	0.0130003
7369	701.5	2	0	1	0	0	0	0.0130321
7371	701.534	2	0	1	0	0	0	0.0129779
7373	701.567	2	0	1	0	0	0	0.0129976
7375	701.6	2	0	1	0	0	0	0.013008
7377	701.634	2	0	1	0	0	0	0.0130196
7379	701.667	2	0	1	0	0	0	0.0129962
7381	701.7	2	0	1	0	0	0	0.0129661
7383	701.734	2	0	1	0	0	0	0.0130091
7385	701.767	2	0	1	0	0	0	0.0129681
7387	701.8	2	0	1	0	0	0	0.0129996
7389	701.834	2	0	1	0	0	0	0.0129847
7391	701.867	2	0	1	0	0	0	0.0130121
7393	701.9	2	0	1	0	0	0	0.0129884
7395	701.934	2	0	1	0	0	0	0.0129833
7397	701.967	2	0	1	0	0	0	0.0129979
7399	702	2	0	1	0	0	0	0.0129613
7401	702.034	2	0	1	0	0	0	0.0130087
7403	702.067	2	0	1	0	0	0	0.0129593
7405	702.1	2	0	1	0	0	0	0.0129948
7407	702.134	2	0	1	0	0	0	0.0129793
7409	702.167	2	0	1	0	0	0	0.0130003
7411	702.2	2	0	1	0	0	0	0.0130358
7413	702.234	2	0	1	0	0	0	0.0130158
7415	702.267	2	0	1	0	0	0	0.0129813
7417	702.3	2	0	1	0	0	0	0.0129837
7419	702.334	2	0	1	0	0	0	0.0129823
7421	702.367	2	0	1	0	0	0	0.0129986
7423	702.4	2	0	1	0	0	0	0.0129495
7425	702.434	2	0	1	0	0	0	0.0129745
7427	702.467	2	0	1	0	0	0	0.0130148
7429	702.5	2	0	1	0	0	0	0.013024
7431	702.534	2	0	1	0	0	0	0.0130206
7433	702.567	2	0	1	0	0	0	0.0129701
7435	702.6	2	0	1	0	0	0	0.0130537
7437	702.634	2	0	1	0	0	0	0.0130118
7439	702.667	2	0	1	0	0	0	0.0130077
7441	702.7	2	0	1	0	0	0	0.0130233
7443	702.734	2	0	1	0	0	0	0.0130473
7445	702.767	2	0	1	0	0	0	0.0130321
7447	702.8	2	0	1	0	0	0	0.013049
7449	702.834	2	0	1	0	0	0	0.0130913
7451	702.867	2	0	1	0	0	0	0.0130635
7453	702.9	2	0	1	0	0	0	0.0130855
7455	702.934	2	0	1	0	0	0	0.0130771
7457	702.967	2	0	1	0	0	0	0.0130764
7459	703	2	0	1	0	0	0	0.0131174
7461	703.034	2	0	1	0	0	0	0.0131285
7463	703.067	2	0	1	0	0	0	0.0131214
7465	703.1	2	0	1	0	0	0	0.0131627
7467	703.134	2	0	1	0	0	0	0.0131099
7469	703.167	2	0	1	0	0	0	0.0131157
7471	703.2	2	0	1	0	0	0	0.0131231
7473	703.234	2	0	1	0	0	0	0.0131207
7475	703.267	2	0	1	0	0	0	0.0130943
7477	703.3	2	0	1	0	0	0	0.0131089
7479	703.334	2	0	1	0	0	0	0.0131458
7481	703.367	2	0	1	0	0	0	0.0130987
7483	703.4	2	0	1	0	0	0	0.0131231
7485	703.434	2	0	1	0	0	0	0.0130957
7487	703.467	2	0	1	0	0	0	0.0131312
7489	703.5	2	0	1	0	0	0	0.0131482
7491	703.534	2	0	1	0	0	0	0.0130801
7493	703.567	2	0	1	0	0	0	0.0130649
7495	703.6	2	0	1	0	0	0	0.0130964
7497	703.634	2	0	1	0	0	0	0.0131099
7499	703.667	2	0	1	0	0	0	0.0130893
7501	703.7	2	0	1	0	0	0	0.0131454
7503	703.734	2	0	1	0	0	0	0.0131163
7505	703.767	2	0	1	0	0	0	0.0130503
7507	703.8	2	0	1	0	0	0	0.0131197
7509	703.834	2	0	1	0	0	0	0.0131123
7511	703.867	2	0	1	0	0	0	0.0131055
7513	703.9	2	0	1	0	0	0	0.0131251
7515	703.934	2	0	1	0	0	0	0.0131756
7517	703.967	2	0	1	0	0	0	0.0131539
7519	704	2	0	1	0	0	0	0.0131488
7521	704.034	2	0	1	0	0	0	0.0131329
7523	704.067	2	0	1	0	0	0	0.0131363
7525	704.1	2	0	1	0	0	0	0.0131272
7527	704.134	2	0	1	0	0	0	0.0131407
7529	704.167	2	0	1	0	0	0	0.0131322
7531	704.2	2	0	1	0	0	0	0.0131417
7533	704.234	2	0	1	0	0	0	0.013113
7535	704.267	2	0	1	0	0	0	0.0131031
7537	704.3	2	0	1	0	0	0	0.0131211
7539	704.334	2	0	1	0	0	0	0.0131333
7541	704.367	2	0	1	0	0	0	0.0131627
7543	704.4	2	0	1	0	0	0	0.0131617
7545	704.434	2	0	1	0	0	0	0.0131722
7547	704.467	2	0	1	0	0	0	0.0131471
7549	704.5	2	0	1	0	0	0	0.0131451
7551	704.534	2	0	1	0	0	0	0.0131573
7553	704.567	2	0	1	0	0	0	0.0131421
7555	704.6	2	0	1	0	0	0	0.0131546
7557	704.634	2	0	1	0	0	0	0.0131519
7559	704.667	2	0	1	0	0	0	0.0130991
7561	704.7	2	0	1	0	0	0	0.013139
7563	704.734	2	0	1	0	0	0	0.0131421
7565	704.767	2	0	1	0	0	0	0.0131397
7567	704.8	2	0	1	0	0	0	0.0131234
7569	704.834	2	0	1	0	0	0	0.0131823
7571	704.867	2	0	1	0	0	0	0.013113
7573	704.9	2	0	1	0	0	0	0.0130815
7575	704.934	2	0	1	0	0	0	0.0130849
7577	704.967	2	0	1	0	0	0	0.0131211
7579	705	2	0	1	0	0	0	0.0131157
7581	705.034	2	0	1	0	0	0	0.0130998
7583	705.067	2	0	1	0	0	0	0.0131065
7585	705.1	2	0	1	0	0	0	0.0130984
7587	705.134	2	0	1	0	0	0	0.0131119
7589	705.167	2	0	1	0	0	0	0.0130842
7591	705.2	2	0	1	0	0	0	0.0131015
7593	705.234	2	0	1	0	0	0	0.0130564
7595	705.267	2	0	1	0	0	0	0.0130683
7597	705.3	2	0	1	0	0	0	0.0130659
7599	705.334	2	0	1	0	0	0	0.013073
7601	705.367	2	0	1	0	0	0	0.0131082
7603	705.4	2	0	1	0	0	0	0.0130849
7605	705.434	2	0	1	0	0	0	0.0130693
7607	705.467	2	0	1	0	0	0	0.0130818
7609	705.5	2	0	1	0	0	0	0.0130324
7611	705.533	2	0	1	0	0	0	0.0130517
7613	705.567	2	0	1	0	0	0	0.0130585
7615	705.6	2	0	1	0	0	0	0.0130933
7617	705.633	2	0	1	0	0	0	0.0130554
7619	705.667	2	0	1	0	0	0	0.0130456
7621	705.7	2	0	1	0	0	0	0.0130307
7623	705.733	2	0	1	0	0	0	0.0130605
7625	705.767	2	0	1	0	0	0	0.0130229
7627	705.8	2	0	1	0	0	0	0.0130764
7629	705.833	2	0	1	0	0	0	0.0130168
7631	705.867	2	0	1	0	0	0	0.013046
7633	705.9	2	0	1	0	0	0	0.0129969
7635	705.933	2	0	1	0	0	0	0.0130707
7637	705.967	2	0	1	0	0	0	0.013004
7639	706	2	0	1	0	0	0	0.012983
7641	706.033	2	0	1	0	0	0	0.0130361
7643	706.067	2	0	1	0	0	0	0.0130101
7645	706.1	2	0	1	0	0	0	0.0130392
7647	706.133	2	0	1	0	0	0	0.0130453
7649	706.167	2	0	1	0	0	0	0.013006
7651	706.2	2	0	1	0	0	0	0.0130409
7653	706.233	2	0	1	0	0	0	0.0130405
7655	706.267	2	0	1	0	0	0	0.0130267
7657	706.3	2	0	1	0	0	0	0.0130104
7659	706.333	2	0	1	0	0	0	0.0130571
7661	706.367	2	0	1	0	0	0	0.0130639
7663	706.4	2	0	1	0	0	0	0.0130575
7665	706.433	2	0	1	0	0	0	0.0130615
7667	706.467	2	0	1	0	0	0	0.0131055
7669	706.5	2	0	1	0	0	0	0.0130673
7671	706.533	2	0	1	0	0	0	0.0130872
7673	706.567	2	0	1	0	0	0	0.0130761
7675	706.6	2	0	1	0	0	0	0.0130981
7677	706.633	2	0	1	0	0	0	0.0130693
7679	706.667	2	0	1	0	0	0	0.0130778
7681	706.7	2	0	1	0	0	0	0.0130825
7683	706.733	2	0	1	0	0	0	0.0130399
7685	706.767	2	0	1	0	0	0	0.0130439
7687	706.8	2	0	1	0	0	0	0.0130876
7689	706.833	2	0	1	0	0	0	0.0130344
7691	706.867	2	0	1	0	0	0	0.0130311
7693	706.9	2	0	1	0	0	0	0.0130064
7695	706.933	2	0	1	0	0	0	0.0130493
7697	706.967	2	0	1	0	0	0	0.0130395
7699	707	2	0	1	0	0	0	0.0130179
7701	707.033	2	0	1	0	0	0	0.0130632
7703	707.067	2	0	1	0	0	0	0.0130128
7705	707.1	2	0	1	0	0	0	0.0130196
7707	707.133	2	0	1	0	0	0	0.01303
7709	707.167	2	0	1	0	0	0	0.0130192
7711	707.2	2	0	1	0	0	0	0.0130043
7713	707.233	2	0	1	0	0	0	0.0130077
7715	707.267	2	0	1	0	0	0	0.0130588
7717	707.3	2	0	1	0	0	0	0.0130368
7719	707.333	2	0	1	0	0	0	0.0130368
7721	707.367	2	0	1	0	0	0	0.0130331
7723	707.4	2	0	1	0	0	0	0.0130135
7725	707.433	2	0	1	0	0	0	0.0130243
7727	707.467	2	0	1	0	0	0	0.013004
7729	707.5	2	0	1	0	0	0	0.013005
7731	707.533	2	0	1	0	0	0	0.0129935
7733	707.567	2	0	1	0	0	0	0.0130155
7735	707.6	2	0	1	0	0	0	0.0130087
7737	707.633	2	0	1	0	0	0	0.0129871
7739	707.667	2	0	1	0	0	0	0.0129796
7741	707.7	2	0	1	0	0	0	0.0130358
7743	707.733	2	0	1	0	0	0	0.0129904
7745	707.767	2	0	1	0	0	0	0.0129891
7747	707.8	2	0	1	0	0	0	0.013006
7749	707.833	2	0	1	0	0	0	0.0129712
7751	707.867	2	0	1	0	0	0	0.0130212
7753	707.9	2	0	1	0	0	0	0.0130053
7755	707.933	2	0	1	0	0	0	0.0129708
7757	707.967	2	0	1	0	0	0	0.0130304
7759	708	2	0	1	0	0	0	0.0130053
7761	708.033	2	0	1	0	0	0	0.0130097
7763	708.067	2	0	1	0	0	0	0.0130165
7765	708.1	2	0	1	0	0	0	0.0129803
7767	708.133	2	0	1	0	0	0	0.0129847
7769	708.167	2	0	1	0	0	0	0.012982
7771	708.2	2	0	1	0	0	0	0.0129908
7773	708.233	2	0	1	0	0	0	0.0129742
7775	708.267	2	0	1	0	0	0	0.0129891
7777	708.3	2	0	1	0	0	0	0.0129745
7779	708.333	2	0	1	0	0	0	0.0130189
7781	708.367	2	0	1	0	0	0	0.0129833
7783	708.4	2	0	1	0	0	0	0.0129796
7785	708.433	2	0	1	0	0	0	0.0129569
7787	708.467	2	0	1	0	0	0	0.0129762
7789	708.5	2	0	1	0	0	0	0.0129671
7791	708.533	2	0	1	0	0	0	0.0129833
7793	708.567	2	0	1	0	0	0	0.0130016
7795	708.6	2	0	1	0	0	0	0.0129437
7797	708.633	2	0	1	0	0	0	0.0129894
7799	708.667	2	0	1	0	0	0	0.0129712
7801	708.7	2	0	1	0	0	0	0.0129495
7803	708.733	2	0	1	0	0	0	0.012984
7805	708.767	2	0	1	0	0	0	0.0129891
7807	708.8	2	0	1	0	0	0	0.0129952
7809	708.833	2	0	1	0	0	0	0.0129701
7811	708.867	2	0	1	0	0	0	0.0129502
7813	708.9	2	0	1	0	0	0	0.012982
7815	708.933	2	0	1	0	0	0	0.012984
7817	708.967	2	0	1	0	0	0	0.0129871
7819	709	2	0	1	0	0	0	0.0129583
7821	709.033	2	0	1	0	0	0	0.0129793
7823	709.067	2	0	1	0	0	0	0.0129911
7825	709.1	2	0	1	0	0	0	0.0129593
7827	709.133	2	0	1	0	0	0	0.0129454
7829	709.167	2	0	1	0	0	0	0.0129715
7831	709.2	2	0	1	0	0	0	0.0129641
7833	709.233	2	0	1	0	0	0	0.0129617
7835	709.267	2	0	1	0	0	0	0.0129661
7837	709.3	2	0	1	0	0	0	0.0130013
7839	709.333	2	0	1	0	0	0	0.0130152
7841	709.367	2	0	1	0	0	0	0.0130223
7843	709.4	2	0	1	0	0	0	0.013007
7845	709.433	2	0	1	0	0	0	0.0129671
7847	709.467	2	0	1	0	0	0	0.0129553
7849	709.5	2	0	1	0	0	0	0.0129661
7851	709.533	2	0	1	0	0	0	0.0129691
7853	709.567	2	0	1	0	0	0	0.0129333
7855	709.6	2	0	1	0	0	0	0.0129593
7857	709.633	2	0	1	0	0	0	0.0129739
7859	709.667	2	0	1	0	0	0	0.0130043
7861	709.7	2	0	1	0	0	0	0.0129918
7863	709.733	2	0	1	0	0	0	0.012959
7865	709.767	2	0	1	0	0	0	0.0129769
7867	709.8	2	0	1	0	0	0	0.0129861
7869	709.833	2	0	1	0	0	0	0.0129796
7871	709.867	2	0	1	0	0	0	0.012981
7873	709.9	2	0	1	0	0	0	0.01298
7875	709.933	2	0	1	0	0	0	0.0129637
7877	709.967	2	0	1	0	0	0	0.0129597
7879	710	2	0	1	0	0	0	0.0129553
7881	710.033	2	0	1	0	0	0	0.0129586
7883	710.067	2	0	1	0	0	0	0.0129468
7885	710.1	2	0	1	0	0	0	0.0129705
7887	710.133	2	0	1	0	0	0	0.0129776
7889	710.167	2	0	1	0	0	0	0.0129756
7891	710.2	2	0	1	0	0	0	0.0129583
7893	710.233	2	0	1	0	0	0	0.0129471
7895	710.267	2	0	1	0	0	0	0.0129999
7897	710.3	2	0	1	0	0	0	0.0129536
7899	710.333	2	0	1	0	0	0	0.0129786
7901	710.367	2	0	1	0	0	0	0.0129414
7903	710.4	2	0	1	0	0	0	0.0129576
7905	710.433	2	0	1	0	0	0	0.0130013
7907	710.467	2	0	1	0	0	0	0.0129556
7909	710.5	2	0	1	0	0	0	0.0129333
7911	710.533	2	0	1	0	0	0	0.0129414
7913	710.567	2	0	1	0	0	0	0.0129671
7915	710.6	2	0	1	0	0	0	0.0129393
7917	710.633	2	0	1	0	0	0	0.0129431
7919	710.667	2	0	1	0	0	0	0.01294
7921	710.7	2	0	1	0	0	0	0.0129275
7923	710.733	2	0	1	0	0	0	0.0129285
7925	710.767	2	0	1	0	0	0	0.0130087
7927	710.8	2	0	1	0	0	0	0.0129377
7929	710.833	2	0	1	0	0	0	0.0129444
7931	710.867	2	0	1	0	0	0	0.0129976
7933	710.9	2	0	1	0	0	0	0.0129492
7935	710.933	2	0	1	0	0	0	0.0129079
7937	710.967	2	0	1	0	0	0	0.0129471
7939	711	2	0	1	0	0	0	0.0129143
7941	711.033	2	0	1	0	0	0	0.0129519
7943	711.067	2	0	1	0	0	0	0.0129549
7945	711.1	2	0	1	0	0	0	0.0129387
7947	711.133	2	0	1	0	0	0	0.0129289
7949	711.167	2	0	1	0	0	0	0.0129593
7951	711.2	2	0	1	0	0	0	0.0129637
7953	711.233	2	0	1	0	0	0	0.0130003
7955	711.267	2	0	1	0	0	0	0.0129982
7957	711.3	2	0	1	0	0	0	0.0129441
7959	711.333	2	0	1	0	0	0	0.0129461
7961	711.367	2	0	1	0	0	0	0.0129607
7963	711.4	2	0	1	0	0	0	0.0129556
7965	711.433	2	0	1	0	0	0	0.0129536
7967	711.467	2	0	1	0	0	0	0.0129485
7969	711.5	2	0	1	0	0	0	0.012919
7971	711.533	2	0	1	0	0	0	0.0129265
7973	711.567	2	0	1	0	0	0	0.0129769
7975	711.6	2	0	1	0	0	0	0.0129387
7977	711.633	2	0	1	0	0	0	0.0129776
7979	711.667	2	0	1	0	0	0	0.0129397
7981	711.7	2	0	1	0	0	0	0.0129258
7983	711.733	2	0	1	0	0	0	0.0128903
7985	711.767	2	0	1	0	0	0	0.0129309
7987	711.8	2	0	1	0	0	0	0.0129025
7989	711.833	2	0	1	0	0	0	0.0129339
7991	711.867	2	0	1	0	0	0	0.0129255
7993	711.9	2	0	1	0	0	0	0.0129306
7995	711.933	2	0	1	0	0	0	0.0129417
7997	711.967	2	0	1	0	0	0	0.0129921
7999	712	2	0	1	0	0	0	0.0129607
8001	712.033	2	0	1	0	0	0	0.012985
8003	712.067	2	0	1	0	0	0	0.0129519
8005	712.1	2	0	1	0	0	0	0.0129004
8007	712.133	2	0	1	0	0	0	0.0129559
8009	712.167	2	0	1	0	0	0	0.0129322
8011	712.2	2	0	1	0	0	0	0.0129884
8013	712.233	2	0	1	0	0	0	0.0130097
8015	712.267	2	0	1	0	0	0	0.0129468
8017	712.3	2	0	1	0	0	0	0.0129793
8019	712.333	2	0	1	0	0	0	0.0130321
8021	712.367	2	0	1	0	0	0	0.0130321
8023	712.4	2	0	1	0	0	0	0.0129948
8025	712.433	2	0	1	0	0	0	0.0130416
8027	712.467	2	0	1	0	0	0	0.0129901
8029	712.5	2	0	1	0	0	0	0.0130121
8031	712.533	2	0	1	0	0	0	0.0130036
8033	712.567	2	0	1	0	0	0	0.0130287
8035	712.6	2	0	1	0	0	0	0.0129542
8037	712.633	2	0	1	0	0	0	0.0129932
8039	712.667	2	0	1	0	0	0	0.0129915
8041	712.7	2	0	1	0	0	0	0.0129505
8043	712.733	2	0	1	0	0	0	0.0129803
8045	712.767	2	0	1	0	0	0	0.0130013
8047	712.8	2	0	1	0	0	0	0.0129553
8049	712.833	2	0	1	0	0	0	0.0129607
8051	712.867	2	0	1	0	0	0	0.0130009
8053	712.9	2	0	1	0	0	0	0.0129762
8055	712.933	2	0	1	0	0	0	0.0129532
8057	712.967	2	0	1	0	0	0	0.0129783
8059	713	2	0	1	0	0	0	0.0129752
8061	713.033	2	0	1	0	0	0	0.0129769
8063	713.066	2	0	1	0	0	0	0.0129915
8065	713.1	2	0	1	0	0	0	0.0130138
8067	713.133	2	0	1	0	0	0	0.0130277
8069	713.166	2	0	1	0	0	0	0.0130314
8071	713.2	2	0	1	0	0	0	0.0130324
8073	713.233	2	0	1	0	0	0	0.0130531
8075	713.266	2	0	1	0	0	0	0.0130547
8077	713.3	2	0	1	0	0	0	0.0130124
8079	713.333	2	0	1	0	0	0	0.0130615
8081	713.366	2	0	1	0	0	0	0.0130175
8083	713.4	2	0	1	0	0	0	0.0130622
8085	713.433	2	0	1	0	0	0	0.0130202
8087	713.466	2	0	1	0	0	0	0.0129857
8089	713.5	2	0	1	0	0	0	0.0130639
8091	713.533	2	0	1	0	0	0	0.0129546
8093	713.566	2	0	1	0	0	0	0.0130212
8095	713.6	2	0	1	0	0	0	0.01303
8097	713.633	2	0	1	0	0	0	0.0130246
8099	713.666	2	0	1	0	0	0	0.0130182
8101	713.7	2	0	1	0	0	0	0.0130344
8103	713.733	2	0	1	0	0	0	0.0130571
8105	713.766	2	0	1	0	0	0	0.0130547
8107	713.8	2	0	1	0	0	0	0.0130155
8109	713.833	2	0	1	0	0	0	0.0130003
8111	713.866	2	0	1	0	0	0	0.0129945
8113	713.9	2	0	1	0	0	0	0.013003
8115	713.933	2	0	1	0	0	0	0.0129894
8117	713.966	2	0	1	0	0	0	0.012962
8119	714	2	0	1	0	0	0	0.0130236
8121	714.033	2	0	1	0	0	0	0.0129969
8123	714.066	2	0	1	0	0	0	0.0129756
8125	714.1	2	0	1	0	0	0	0.0129651
8127	714.133	2	0	1	0	0	0	0.0129569
8129	714.166	2	0	1	0	0	0	0.0129708
8131	714.2	2	0	1	0	0	0	0.0129644
8133	714.233	2	0	1	0	0	0	0.0129668
8135	714.266	2	0	1	0	0	0	0.0129366
8137	714.3	2	0	1	0	0	0	0.0129874
8139	714.333	2	0	1	0	0	0	0.013007
8141	714.366	2	0	1	0	0	0	0.0129644
8143	714.4	2	0	1	0	0	0	0.012917
8145	714.433	2	0	1	0	0	0	0.0129671
8147	714.466	2	0	1	0	0	0	0.0129898
8149	714.5	2	0	1	0	0	0	0.0129336
8151	714.533	2	0	1	0	0	0	0.0130016
8153	714.566	2	0	1	0	0	0	0.0130192
8155	714.6	2	0	1	0	0	0	0.0129268
8157	714.633	2	0	1	0	0	0	0.0129745
8159	714.666	2	0	1	0	0	0	0.0129986
8161	714.7	2	0	1	0	0	0	0.0129725
8163	714.733	2	0	1	0	0	0	0.0129637
8165	714.766	2	0	1	0	0	0	0.012984
8167	714.8	2	0	1	0	0	0	0.0129888
8169	714.833	2	0	1	0	0	0	0.0130033
8171	714.866	2	0	1	0	0	0	0.0130297
8173	714.9	2	0	1	0	0	0	0.0130219
8175	714.933	2	0	1	0	0	0	0.013003
8177	714.966	2	0	1	0	0	0	0.0130463
8179	715	2	0	1	0	0	0	0.0130351
8181	715.033	2	0	1	0	0	0	0.0130561
8183	715.066	2	0	1	0	0	0	0.0130277
8185	715.1	2	0	1	0	0	0	0.0130355
8187	715.133	2	0	1	0	0	0	0.0130118
8189	715.166	2	0	1	0	0	0	0.0130233
8191	715.2	2	0	1	0	0	0	0.0130429
8193	715.233	2	0	1	0	0	0	0.0130114
8195	715.266	2	0	1	0	0	0	0.0129979
8197	715.3	2	0	1	0	0	0	0.0130649
8199	715.333	2	0	1	0	0	0	0.0130101
8201	715.366	2	0	1	0	0	0	0.013002
8203	715.4	2	0	1	0	0	0	0.0129935
8205	715.433	2	0	1	0	0	0	0.0130135
8207	715.466	2	0	1	0	0	0	0.0129671
8209	715.5	2	0	1	0	0	0	0.0129725
8211	715.533	2	0	1	0	0	0	0.0129904
8213	715.566	2	0	1	0	0	0	0.0129356
8215	715.6	2	0	1	0	0	0	0.0129695
8217	715.633	2	0	1	0	0	0	0.0129668
8219	715.666	2	0	1	0	0	0	0.0129387
8221	715.7	2	0	1	0	0	0	0.0129224
8223	715.733	2	0	1	0	0	0	0.0129329
8225	715.766	2	0	1	0	0	0	0.012958
8227	715.8	2	0	1	0	0	0	0.0129661
8229	715.833	2	0	1	0	0	0	0.0129377
8231	715.866	2	0	1	0	0	0	0.0129035
8233	715.9	2	0	1	0	0	0	0.0129776
8235	715.933	2	0	1	0	0	0	0.0128916
8237	715.966	2	0	1	0	0	0	0.0129451
8239	716	2	0	1	0	0	0	0.0129207
8241	716.033	2	0	1	0	0	0	0.0129346
8243	716.066	2	0	1	0	0	0	0.0128808
8245	716.1	2	0	1	0	0	0	0.0129089
8247	716.133	2	0	1	0	0	0	0.0128595
8249	716.166	2	0	1	0	0	0	0.0128869
8251	716.2	2	0	1	0	0	0	0.0129062
8253	716.233	2	0	1	0	0	0	0.012896
8255	716.266	2	0	1	0	0	0	0.0129231
8257	716.3	2	0	1	0	0	0	0.0128734
8259	716.333	2	0	1	0	0	0	0.0128943
8261	716.366	2	0	1	0	0	0	0.012851
8263	716.4	2	0	1	0	0	0	0.01287
8265	716.433	2	0	1	0	0	0	0.0129136
8267	716.466	2	0	1	0	0	0	0.012895
8269	716.5	2	0	1	0	0	0	0.0128852
8271	716.533	2	0	1	0	0	0	0.0129421
8273	716.566	2	0	1	0	0	0	0.0129285
8275	716.6	2	0	1	0	0	0	0.0129586
8277	716.633	2	0	1	0	0	0	0.0129688
8279	716.666	2	0	1	0	0	0	0.012961
8281	716.7	2	0	1	0	0	0	0.0129498
8283	716.733	2	0	1	0	0	0	0.0129674
8285	716.766	2	0	1	0	0	0	0.0129647
8287	716.8	2	0	1	0	0	0	0.0129566
8289	716.833	2	0	1	0	0	0	0.0129102
8291	716.866	2	0	1	0	0	0	0.0129434
8293	716.9	2	0	1	0	0	0	0.0129986
8295	716.933	2	0	1	0	0	0	0.0129705
8297	716.966	2	0	1	0	0	0	0.0129617
8299	717	2	0	1	0	0	0	0.0129546
8301	717.033	2	0	1	0	0	0	0.0129282
8303	717.066	2	0	1	0	0	0	0.0129894
8305	717.1	2	0	1	0	0	0	0.0129732
8307	717.133	2	0	1	0	0	0	0.0129542
8309	717.166	2	0	1	0	0	0	0.0129556
8311	717.2	2	0	1	0	0	0	0.0129884
8313	717.233	2	0	1	0	0	0	0.0129363
8315	717.266	2	0	1	0	0	0	0.0129262
8317	717.3	2	0	1	0	0	0	0.0129519
8319	717.333	2	0	1	0	0	0	0.0129441
8321	717.366	2	0	1	0	0	0	0.0129207
8323	717.4	2	0	1	0	0	0	0.0128937
8325	717.433	2	0	1	0	0	0	0.0129153
8327	717.466	2	0	1	0	0	0	0.012916
8329	717.5	2	0	1	0	0	0	0.0129251
8331	717.533	2	0	1	0	0	0	0.0128818
8333	717.566	2	0	1	0	0	0	0.0128683
8335	717.6	2	0	1	0	0	0	0.0129488
8337	717.633	2	0	1	0	0	0	0.0129035
8339	717.666	2	0	1	0	0	0	0.0128727
8341	717.7	2	0	1	0	0	0	0.0128734
8343	717.733	2	0	1	0	0	0	0.0129001
8345	717.766	2	0	1	0	0	0	0.0128886
8347	717.8	2	0	1	0	0	0	0.0128784
8349	717.833	2	0	1	0	0	0	0.0129031
8351	717.866	2	0	1	0	0	0	0.0128774
8353	717.9	2	0	1	0	0	0	0.0128899
8355	717.933	2	0	1	0	0	0	0.01287
8357	717.966	2	0	1	0	0	0	0.0129194
8359	718	2	0	1	0	0	0	0.0128781
8361	718.033	2	0	1	0	0	0	0.0129319
8363	718.066	2	0	1	0	0	0	0.0128747
8365	718.1	2	0	1	0	0	0	0.0128527
8367	718.133	2	0	1	0	0	0	0.0129157
8369	718.166	2	0	1	0	0	0	0.0128906
8371	718.2	2	0	1	0	0	0	0.0129116
8373	718.233	2	0	1	0	0	0	0.0128981
8375	718.266	2	0	1	0	0	0	0.0128537
8377	718.3	2	0	1	0	0	0	0.012919
8379	718.333	2	0	1	0	0	0	0.012873
8381	718.366	2	0	1	0	0	0	0.0129058
8383	718.4	2	0	1	0	0	0	0.012874
8385	718.433	2	0	1	0	0	0	0.012897
8387	718.466	2	0	1	0	0	0	0.0128967
8389	718.5	2	0	1	0	0	0	0.0128774
8391	718.533	2	0	1	0	0	0	0.0128913
8393	718.566	2	0	1	0	0	0	0.0129038
8395	718.6	2	0	1	0	0	0	0.0129218
8397	718.633	2	0	1	0	0	0	0.0129082
8399	718.666	2	0	1	0	0	0	0.0129031
8401	718.7	2	0	1	0	0	0	0.0129536
8403	718.733	2	0	1	0	0	0	0.0129475
8405	718.766	2	0	1	0	0	0	0.0129901
8407	718.8	2	0	1	0	0	0	0.0129417
8409	718.833	2	0	1	0	0	0	0.0129312
8411	718.866	2	0	1	0	0	0	0.012916
8413	718.9	2	0	1	0	0	0	0.0129221
8415	718.933	2	0	1	0	0	0	0.0129417
8417	718.966	2	0	1	0	0	0	0.0129309
8419	719	2	0	1	0	0	0	0.0129099
8421	719.033	2	0	1	0	0	0	0.0128835
8423	719.066	2	0	1	0	0	0	0.0129126
8425	719.1	2	0	1	0	0	0	0.0129194
8427	719.133	2	0	1	0	0	0	0.0129207
8429	719.166	2	0	1	0	0	0	0.0129414
8431	719.2	2	0	1	0	0	0	0.0129349
8433	719.233	2	0	1	0	0	0	0.012871
8435	719.266	2	0	1	0	0	0	0.0129248
8437	719.3	2	0	1	0	0	0	0.0129647
8439	719.333	2	0	1	0	0	0	0.012915
8441	719.366	2	0	1	0	0	0	0.0129167
8443	719.4	2	0	1	0	0	0	0.0129096
8445	719.433	2	0	1	0	0	0	0.0129133
8447	719.466	2	0	1	0	0	0	0.0129163
8449	719.5	2	0	1	0	0	0	0.0128937
8451	719.533	2	0	1	0	0	0	0.0128784
8453	719.566	2	0	1	0	0	0	0.0129055
8455	719.6	2	0	1	0	0	0	0.0129028
8457	719.633	2	0	1	0	0	0	0.0128852
8459	719.666	2	0	1	0	0	0	0.0129052
8461	719.7	2	0	1	0	0	0	0.0128811
8463	719.733	2	0	1	0	0	0	0.0128256
8465	719.766	2	0	1	0	0	0	0.0129102
8467	719.8	2	0	1	0	0	0	0.0128737
8469	719.833	2	0	1	0	0	0	0.0128517
8471	719.866	2	0	1	0	0	0	0.0128527
8473	719.9	2	0	1	0	0	0	0.0128615
8475	719.933	2	0	1	0	0	0	0.0128531
8477	719.966	2	0	1	0	0	0	0.0128165
8479	720	2	0	1	0	0	0	0.0128659
8481	720.033	2	0	1	0	0	0	0.0128571
8483	720.066	2	0	1	0	0	0	0.0129231
8485	720.1	2	0	1	0	0	0	0.0129136
8487	720.133	2	0	1	0	0	0	0.0129207
8489	720.166	2	0	1	0	0	0	0.0129657
8491	720.2	2	0	1	0	0	0	0.0129603
8493	720.233	2	0	1	0	0	0	0.0129942
8495	720.266	2	0	1	0	0	0	0.0129569
8497	720.3	2	0	1	0	0	0	0.0129309
8499	720.333	2	0	1	0	0	0	0.0129431
8501	720.366	2	0	1	0	0	0	0.0129915
8503	720.4	2	0	1	0	0	0	0.0129654
8505	720.433	2	0	1	0	0	0	0.0129353
8507	720.466	2	0	1	0	0	0	0.0129194
8509	720.5	2	0	1	0	0	0	0.0129911
8511	720.533	2	0	1	0	0	0	0.0129106
8513	720.566	2	0	1	0	0	0	0.0129593
8515	720.6	2	0	1	0	0	0	0.0129593
8517	720.633	2	0	1	0	0	0	0.0129803
8519	720.666	2	0	1	0	0	0	0.0129404
8521	720.7	2	0	1	0	0	0	0.0129421
8523	720.733	2	0	1	0	0	0	0.0129255
8525	720.766	2	0	1	0	0	0	0.0129661
8527	720.8	2	0	1	0	0	0	0.012938
8529	720.833	2	0	1	0	0	0	0.0129488
8531	720.866	2	0	1	0	0	0	0.012918
8533	720.9	2	0	1	0	0	0	0.0129258
8535	720.933	2	0	1	0	0	0	0.012937
8537	720.966	2	0	1	0	0	0	0.0129072
8539	721	2	0	1	0	0	0	0.0129262
8541	721.033	2	0	1	0	0	0	0.0129377
8543	721.066	2	0	1	0	0	0	0.0128947
8545	721.1	2	0	1	0	0	0	0.0129407
8547	721.133	2	0	1	0	0	0	0.0129096
8549	721.166	2	0	1	0	0	0	0.0129075
8551	721.2	2	0	1	0	0	0	0.0129035
8553	721.233	2	0	1	0	0	0	0.0128964
8555	721.266	2	0	1	0	0	0	0.0129241
8557	721.3	2	0	1	0	0	0	0.0129197
8559	721.333	2	0	1	0	0	0	0.0129339
8561	721.366	2	0	1	0	0	0	0.0129407
8563	721.4	2	0	1	0	0	0	0.0129461
8565	721.433	2	0	1	0	0	0	0.0129451
8567	721.466	2	0	1	0	0	0	0.0129329
8569	721.5	2	0	1	0	0	0	0.012914
8571	721.533	2	0	1	0	0	0	0.0129184
8573	721.566	2	0	1	0	0	0	0.0129099
8575	721.6	2	0	1	0	0	0	0.0129133
8577	721.633	2	0	1	0	0	0	0.0129272
8579	721.666	2	0	1	0	0	0	0.0129025
8581	721.699	2	0	1	0	0	0	0.0129613
8583	721.733	2	0	1	0	0	0	0.0129701
8585	721.766	2	0	1	0	0	0	0.0129272
8587	721.799	2	0	1	0	0	0	0.0129353
8589	721.833	2	0	1	0	0	0	0.0129069
8591	721.866	2	0	1	0	0	0	0.0128862
8593	721.899	2	0	1	0	0	0	0.0128771
8595	721.933	2	0	1	0	0	0	0.0128761
8597	721.966	2	0	1	0	0	0	0.0129275
8599	721.999	2	0	1	0	0	0	0.0129306
8601	722.033	2	0	1	0	0	0	0.0129309
8603	722.066	2	0	1	0	0	0	0.0129837
8605	722.099	2	0	1	0	0	0	0.0129299
8607	722.133	2	0	1	0	0	0	0.0129695
8609	722.166	2	0	1	0	0	0	0.0129837
8611	722.199	2	0	1	0	0	0	0.0129952
8613	722.233	2	0	1	0	0	0	0.0129218
8615	722.266	2	0	1	0	0	0	0.0129674
8617	722.299	2	0	1	0	0	0	0.012959
8619	722.333	2	0	1	0	0	0	0.0129197
8621	722.366	2	0	1	0	0	0	0.0129695
8623	722.399	2	0	1	0	0	0	0.01296
8625	722.433	2	0	1	0	0	0	0.0129837
8627	722.466	2	0	1	0	0	0	0.0129082
8629	722.499	2	0	1	0	0	0	0.012963
8631	722.533	2	0	1	0	0	0	0.0129498
8633	722.566	2	0	1	0	0	0	0.0129742
8635	722.599	2	0	1	0	0	0	0.0129569
8637	722.633	2	0	1	0	0	0	0.0129062
8639	722.666	2	0	1	0	0	0	0.0129634
8641	722.699	2	0	1	0	0	0	0.012941
8643	722.733	2	0	1	0	0	0	0.0129363
8645	722.766	2	0	1	0	0	0	0.0129322
8647	722.799	2	0	1	0	0	0	0.0129011
8649	722.833	2	0	1	0	0	0	0.0129546
8651	722.866	2	0	1	0	0	0	0.0129756
8653	722.899	2	0	1	0	0	0	0.0129515
8655	722.933	2	0	1	0	0	0	0.0129563
8657	722.966	2	0	1	0	0	0	0.0129813
8659	722.999	2	0	1	0	0	0	0.012938
8661	723.033	2	0	1	0	0	0	0.0129265
8663	723.066	2	0	1	0	0	0	0.0129329
8665	723.099	2	0	1	0	0	0	0.0128808
8667	723.133	2	0	1	0	0	0	0.0129035
8669	723.166	2	0	1	0	0	0	0.0129065
8671	723.199	2	0	1	0	0	0	0.0129065
8673	723.233	2	0	1	0	0	0	0.0129641
8675	723.266	2	0	1	0	0	0	0.0129211
8677	723.299	2	0	1	0	0	0	0.0129475
8679	723.333	2	0	1	0	0	0	0.0129299
8681	723.366	2	0	1	0	0	0	0.0129133
8683	723.399	2	0	1	0	0	0	0.0129238
8685	723.433	2	0	1	0	0	0	0.0129339
8687	723.466	2	0	1	0	0	0	0.0129322
8689	723.499	2	0	1	0	0	0	0.0129025
8691	723.533	2	0	1	0	0	0	0.0129031
8693	723.566	2	0	1	0	0	0	0.0128723
8695	723.599	2	0	1	0	0	0	0.0129251
8697	723.633	2	0	1	0	0	0	0.0128998
8699	723.666	2	0	1	0	0	0	0.012892
8701	723.699	2	0	1	0	0	0	0.0129109
8703	723.733	2	0	1	0	0	0	0.0128734
8705	723.766	2	0	1	0	0	0	0.0129011
8707	723.799	2	0	1	0	0	0	0.0128889
8709	723.833	2	0	1	0	0	0	0.012894
8711	723.866	2	0	1	0	0	0	0.0129289
8713	723.899	2	0	1	0	0	0	0.0129072
8715	723.933	2	0	1	0	0	0	0.0128754
8717	723.966	2	0	1	0	0	0	0.0128998
8719	723.999	2	0	1	0	0	0	0.0129163
8721	724.033	2	0	1	0	0	0	0.0129306
8723	724.066	2	0	1	0	0	0	0.0129397
8725	724.099	2	0	1	0	0	0	0.0129661
8727	724.133	2	0	1	0	0	0	0.0129309
8729	724.166	2	0	1	0	0	0	0.0128984
8731	724.199	2	0	1	0	0	0	0.0129096
8733	724.233	2	0	1	0	0	0	0.0129177
8735	724.266	2	0	1	0	0	0	0.0129234
8737	724.299	2	0	1	0	0	0	0.0129079
8739	724.333	2	0	1	0	0	0	0.0129278
8741	724.366	2	0	1	0	0	0	0.0128747
8743	724.399	2	0	1	0	0	0	0.0128388
8745	724.433	2	0	1	0	0	0	0.0128669
8747	724.466	2	0	1	0	0	0	0.0129072
8749	724.499	2	0	1	0	0	0	0.0128663
8751	724.533	2	0	1	0	0	0	0.0128449
8753	724.566	2	0	1	0	0	0	0.0129366
8755	724.599	2	0	1	0	0	0	0.0128696
8757	724.633	2	0	1	0	0	0	0.0128734
8759	724.666	2	0	1	0	0	0	0.0128679
8761	724.699	2	0	1	0	0	0	0.0128507
8763	724.733	2	0	1	0	0	0	0.0128192
8765	724.766	2	0	1	0	0	0	0.0127928
8767	724.799	2	0	1	0	0	0	0.0128405
8769	724.833	2	0	1	0	0	0	0.0127989
8771	724.866	2	0	1	0	0	0	0.0128236
8773	724.899	2	0	1	0	0	0	0.0128514
8775	724.933	2	0	1	0	0	0	0.0128483
8777	724.966	2	0	1	0	0	0	0.0128629
8779	724.999	2	0	1	0	0	0	0.0128693
8781	725.033	2	0	1	0	0	0	0.0128338
8783	725.066	2	0	1	0	0	0	0.0128256
8785	725.099	2	0	1	0	0	0	0.0128507
8787	725.133	2	0	1	0	0	0	0.0128432
8789	725.166	2	0	1	0	0	0	0.0128405
8791	725.199	2	0	1	0	0	0	0.0129231
8793	725.233	2	0	1	0	0	0	0.0128564
8795	725.266	2	0	1	0	0	0	0.0128747
8797	725.299	2	0	1	0	0	0	0.0128547
8799	725.333	2	0	1	0	0	0	0.0128375
8801	725.366	2	0	1	0	0	0	0.0128602
8803	725.399	2	0	1	0	0	0	0.0128794
8805	725.433	2	0	1	0	0	0	0.0128781
8807	725.466	2	0	1	0	0	0	0.0128531
8809	725.499	2	0	1	0	0	0	0.0128395
8811	725.533	2	0	1	0	0	0	0.0128727
8813	725.566	2	0	1	0	0	0	0.0128981
8815	725.599	2	0	1	0	0	0	0.01287
8817	725.633	2	0	1	0	0	0	0.0128399
8819	725.666	2	0	1	0	0	0	0.0128277
8821	725.699	2	0	1	0	0	0	0.012869
8823	725.733	2	0	1	0	0	0	0.0128179
8825	725.766	2	0	1	0	0	0	0.0128168
8827	725.799	2	0	1	0	0	0	0.0128923
8829	725.833	2	0	1	0	0	0	0.0128808
8831	725.866	2	0	1	0	0	0	0.0128798
8833	725.899	2	0	1	0	0	0	0.0129045
8835	725.933	2	0	1	0	0	0	0.0129035
8837	725.966	2	0	1	0	0	0	0.0129099
8839	725.999	2	0	1	0	0	0	0.0129275
8841	726.033	2	0	1	0	0	0	0.012869
8843	726.066	2	0	1	0	0	0	0.0129414
8845	726.099	2	0	1	0	0	0	0.0128602
8847	726.133	2	0	1	0	0	0	0.0129035
8849	726.166	2	0	1	0	0	0	0.0129454
8851	726.199	2	0	1	0	0	0	0.0128619
8853	726.233	2	0	1	0	0	0	0.0128656
8855	726.266	2	0	1	0	0	0	0.0128534
8857	726.299	2	0	1	0	0	0	0.0128713
8859	726.333	2	0	1	0	0	0	0.0128761
8861	726.366	2	0	1	0	0	0	0.0129146
8863	726.399	2	0	1	0	0	0	0.0128991
8865	726.433	2	0	1	0	0	0	0.012915
8867	726.466	2	0	1	0	0	0	0.0129289
8869	726.499	2	0	1	0	0	0	0.0129586
8871	726.533	2	0	1	0	0	0	0.0128913
8873	726.566	2	0	1	0	0	0	0.0129705
8875	726.599	2	0	1	0	0	0	0.0128855
8877	726.633	2	0	1	0	0	0	0.0129251
8879	726.666	2	0	1	0	0	0	0.0128642
8881	726.699	2	0	1	0	0	0	0.0128977
8883	726.733	2	0	1	0	0	0	0.0129086
8885	726.766	2	0	1	0	0	0	0.0129204
8887	726.799	2	0	1	0	0	0	0.0129377
8889	726.833	2	0	1	0	0	0	0.0129465
8891	726.866	2	0	1	0	0	0	0.0129471
8893	726.899	2	0	1	0	0	0	0.0129532
8895	726.933	2	0	1	0	0	0	0.0129908
8897	726.966	2	0	1	0	0	0	0.0129678
8899	726.999	2	0	1	0	0	0	0.0129938
8901	727.033	2	0	1	0	0	0	0.0129911
8903	727.066	2	0	1	0	0	0	0.0129417
8905	727.099	2	0	1	0	0	0	0.0129397
8907	727.133	2	0	1	0	0	0	0.0129336
8909	727.166	2	0	1	0	0	0	0.0128899
8911	727.199	2	0	1	0	0	0	0.0128977
8913	727.233	2	0	1	0	0	0	0.0129475
8915	727.266	2	0	1	0	0	0	0.0129312
8917	727.299	2	0	1	0	0	0	0.0129031
8919	727.333	2	0	1	0	0	0	0.0129221
8921	727.366	2	0	1	0	0	0	0.0129295
8923	727.399	2	0	1	0	0	0	0.012892
8925	727.433	2	0	1	0	0	0	0.0128998
8927	727.466	2	0	1	0	0	0	0.0128544
8929	727.499	2	0	1	0	0	0	0.0129058
8931	727.533	2	0	1	0	0	0	0.0129349
8933	727.566	2	0	1	0	0	0	0.0128845
8935	727.599	2	0	1	0	0	0	0.0128811
8937	727.633	2	0	1	0	0	0	0.0128588
8939	727.666	2	0	1	0	0	0	0.0128541
8941	727.699	2	0	1	0	0	0	0.0128717
8943	727.733	2	0	1	0	0	0	0.0128635
8945	727.766	2	0	1	0	0	0	0.0128524
8947	727.799	2	0	1	0	0	0	0.0128666
8949	727.833	2	0	1	0	0	0	0.0128987
8951	727.866	2	0	1	0	0	0	0.0128815
8953	727.899	2	0	1	0	0	0	0.0128524
8955	727.933	2	0	1	0	0	0	0.012848
8957	727.966	2	0	1	0	0	0	0.0128544
8959	727.999	2	0	1	0	0	0	0.0128419
8961	728.033	2	0	1	0	0	0	0.0128683
8963	728.066	2	0	1	0	0	0	0.0128754
8965	728.099	2	0	1	0	0	0	0.0128524
8967	728.133	2	0	1	0	0	0	0.0128598
8969	728.166	2	0	1	0	0	0	0.0128595
8971	728.199	2	0	1	0	0	0	0.0129163
8973	728.233	2	0	1	0	0	0	0.0129336
8975	728.266	2	0	1	0	0	0	0.0128981
8977	728.299	2	0	1	0	0	0	0.0129309
8979	728.333	2	0	1	0	0	0	0.0129312
8981	728.366	2	0	1	0	0	0	0.0129143
8983	728.399	2	0	1	0	0	0	0.0128967
8985	728.433	2	0	1	0	0	0	0.0129383
8987	728.466	2	0	1	0	0	0	0.0129485
8989	728.499	2	0	1	0	0	0	0.0129393
8991	728.533	2	0	1	0	0	0	0.0128879
8993	728.566	2	0	1	0	0	0	0.0129431
8995	728.599	2	0	1	0	0	0	0.0129664
8997	728.633	2	0	1	0	0	0	0.0129904
8999	728.666	2	0	1	0	0	0	0.0129461
9001	728.699	2	0	1	0	0	0	0.0129536
9003	728.733	2	0	1	0	0	0	0.0129265
9005	728.766	2	0	1	0	0	0	0.0129461
9007	728.799	2	0	1	0	0	0	0.0129106
9009	728.833	2	0	1	0	0	0	0.0128957
9011	728.866	2	0	1	0	0	0	0.0129603
9013	728.899	2	0	1	0	0	0	0.0129796
9015	728.933	2	0	1	0	0	0	0.0129471
9017	728.966	2	0	1	0	0	0	0.0129583
9019	728.999	2	0	1	0	0	0	0.0129661
9021	729.033	2	0	1	0	0	0	0.0129789
9023	729.066	2	0	1	0	0	0	0.0129698
9025	729.099	2	0	1	0	0	0	0.0130355
9027	729.133	2	0	1	0	0	0	0.0130585
9029	729.166	2	0	1	0	0	0	0.0130165
9031	729.199	2	0	1	0	0	0	0.0130121
9033	729.233	2	0	1	0	0	0	0.013003
9035	729.266	2	0	1	0	0	0	0.0129498
9037	729.299	2	0	1	0	0	0	0.0129657
9039	729.333	2	0	1	0	0	0	0.0129525
9041	729.366	2	0	1	0	0	0	0.0129813
9043	729.399	2	0	1	0	0	0	0.0129441
9045	729.433	2	0	1	0	0	0	0.0129339
9047	729.466	2	0	1	0	0	0	0.012918
9049	729.499	2	0	1	0	0	0	0.0128991
9051	729.533	2	0	1	0	0	0	0.0129153
9053	729.566	2	0	1	0	0	0	0.012941
9055	729.599	2	0	1	0	0	0	0.0129437
9057	729.633	2	0	1	0	0	0	0.0130074
9059	729.666	2	0	1	0	0	0	0.0130382
9061	729.699	2	0	1	0	0	0	0.0130003
9063	729.733	2	0	1	0	0	0	0.013007
9065	729.766	2	0	1	0	0	0	0.0129999
9067	729.799	2	0	1	0	0	0	0.0129952
9069	729.833	2	0	1	0	0	0	0.01303
9071	729.866	2	0	1	0	0	0	0.0130568
9073	729.899	2	0	1	0	0	0	0.0130531
9075	729.933	2	0	1	0	0	0	0.013029
9077	729.966	2	0	1	0	0	0	0.0130615
9079	729.999	2	0	1	0	0	0	0.0130416
9081	730.033	2	0	1	0	0	0	0.0130774
9083	730.066	2	0	1	0	0	0	0.0131163
9085	730.099	2	0	1	0	0	0	0.0130585
9087	730.133	2	0	1	0	0	0	0.0130463
9089	730.166	2	0	1	0	0	0	0.0130994
9091	730.199	2	0	1	0	0	0	0.0130544
9093	730.232	2	0	1	0	0	0	0.0130795
9095	730.266	2	0	1	0	0	0	0.0130402
9097	730.299	2	0	1	0	0	0	0.0130822
9099	730.332	2	0	1	0	0	0	0.0130145
9101	730.366	2	0	1	0	0	0	0.0130409
9103	730.399	2	0	1	0	0	0	0.013027
9105	730.432	2	0	1	0	0	0	0.0130124
9107	730.466	2	0	1	0	0	0	0.0129999
9109	730.499	2	0	1	0	0	0	0.0129844
9111	730.532	2	0	1	0	0	0	0.0129776
9113	730.566	2	0	1	0	0	0	0.0129387
9115	730.599	2	0	1	0	0	0	0.0129668
9117	730.632	2	0	1	0	0	0	0.0129349
9119	730.666	2	0	1	0	0	0	0.0129228
9121	730.699	2	0	1	0	0	0	0.0129343
9123	730.732	2	0	1	0	0	0	0.0129343
9125	730.766	2	0	1	0	0	0	0.012939
9127	730.799	2	0	1	0	0	0	0.0129586
9129	730.832	2	0	1	0	0	0	0.0130121
9131	730.866	2	0	1	0	0	0	0.0129668
9133	730.899	2	0	1	0	0	0	0.0129668
9135	730.932	2	0	1	0	0	0	0.0129827
9137	730.966	2	0	1	0	0	0	0.0129725
9139	730.999	2	0	1	0	0	0	0.0129566
9141	731.032	2	0	1	0	0	0	0.0129282
9143	731.066	2	0	1	0	0	0	0.0129214
9145	731.099	2	0	1	0	0	0	0.0129329
9147	731.132	2	0	1	0	0	0	0.0129478
9149	731.166	2	0	1	0	0	0	0.0129268
9151	731.199	2	0	1	0	0	0	0.0129248
9153	731.232	2	0	1	0	0	0	0.0129617
9155	731.266	2	0	1	0	0	0	0.012958
9157	731.299	2	0	1	0	0	0	0.0129424
9159	731.332	2	0	1	0	0	0	0.0129647
9161	731.366	2	0	1	0	0	0	0.0129972
9163	731.399	2	0	1	0	0	0	0.0129657
9165	731.432	2	0	1	0	0	0	0.0129915
9167	731.466	2	0	1	0	0	0	0.0129712
9169	731.499	2	0	1	0	0	0	0.0130155
9171	731.532	2	0	1	0	0	0	0.012961
9173	731.566	2	0	1	0	0	0	0.0130036
9175	731.599	2	0	1	0	0	0	0.0129745
9177	731.632	2	0	1	0	0	0	0.0130388
9179	731.666	2	0	1	0	0	0	0.0131153
9181	731.699	2	0	1	0	0	0	0.0130608
9183	731.732	2	0	1	0	0	0	0.0130344
9185	731.766	2	0	1	0	0	0	0.013096
9187	731.799	2	0	1	0	0	0	0.0130744
9189	731.832	2	0	1	0	0	0	0.0130497
9191	731.866	2	0	1	0	0	0	0.0130605
9193	731.899	2	0	1	0	0	0	0.0129881
9195	731.932	2	0	1	0	0	0	0.0130351
9197	731.966	2	0	1	0	0	0	0.0130669
9199	731.999	2	0	1	0	0	0	0.0130713
9201	732.032	2	0	1	0	0	0	0.0130128
9203	732.066	2	0	1	0	0	0	0.0130223
9205	732.099	2	0	1	0	0	0	0.0130317
9207	732.132	2	0	1	0	0	0	0.0130209
9209	732.166	2	0	1	0	0	0	0.0130541
9211	732.199	2	0	1	0	0	0	0.0130141
9213	732.232	2	0	1	0	0	0	0.0130402
9215	732.266	2	0	1	0	0	0	0.0130216
9217	732.299	2	0	1	0	0	0	0.0129813
9219	732.332	2	0	1	0	0	0	0.0129597
9221	732.366	2	0	1	0	0	0	0.0130182
9223	732.399	2	0	1	0	0	0	0.012985
9225	732.432	2	0	1	0	0	0	0.0129722
9227	732.466	2	0	1	0	0	0	0.0129478
9229	732.499	2	0	1	0	0	0	0.0129955
9231	732.532	2	0	1	0	0	0	0.0130077
9233	732.566	2	0	1	0	0	0	0.0130443
9235	732.599	2	0	1	0	0	0	0.0130358
9237	732.632	2	0	1	0	0	0	0.0130392
9239	732.666	2	0	1	0	0	0	0.0129935
9241	732.699	2	0	1	0	0	0	0.0130118
9243	732.732	2	0	1	0	0	0	0.0129982
9245	732.766	2	0	1	0	0	0	0.0129932
9247	732.799	2	0	1	0	0	0	0.0129458
9249	732.832	2	0	1	0	0	0	0.0130033
9251	732.866	2	0	1	0	0	0	0.0129661
9253	732.899	2	0	1	0	0	0	0.0129657
9255	732.932	2	0	1	0	0	0	0.0129779
9257	732.966	2	0	1	0	0	0	0.0129553
9259	732.999	2	0	1	0	0	0	0.0129705
9261	733.032	2	0	1	0	0	0	0.0129722
9263	733.066	2	0	1	0	0	0	0.0129519
9265	733.099	2	0	1	0	0	0	0.0129715
9267	733.132	2	0	1	0	0	0	0.013005
9269	733.166	2	0	1	0	0	0	0.0130043
9271	733.199	2	0	1	0	0	0	0.0129874
9273	733.232	2	0	1	0	0	0	0.0129654
9275	733.266	2	0	1	0	0	0	0.0129742
9277	733.299	2	0	1	0	0	0	0.0129752
9279	733.332	2	0	1	0	0	0	0.0129671
9281	733.366	2	0	1	0	0	0	0.0129427
9283	733.399	2	0	1	0	0	0	0.0129048
9285	733.432	2	0	1	0	0	0	0.0129654
9287	733.466	2	0	1	0	0	0	0.0129593
9289	733.499	2	0	1	0	0	0	0.0129678
9291	733.532	2	0	1	0	0	0	0.0130277
9293	733.566	2	0	1	0	0	0	0.013027
9295	733.599	2	0	1	0	0	0	0.0129471
9297	733.632	2	0	1	0	0	0	0.012958
9299	733.666	2	0	1	0	0	0	0.0129505
9301	733.699	2	0	1	0	0	0	0.0129948
9303	733.732	2	0	1	0	0	0	0.0129884
9305	733.766	2	0	1	0	0	0	0.0129498
9307	733.799	2	0	1	0	0	0	0.0129519
9309	733.832	2	0	1	0	0	0	0.0129312
9311	733.866	2	0	1	0	0	0	0.0129454
9313	733.899	2	0	1	0	0	0	0.0129556
9315	733.932	2	0	1	0	0	0	0.0129373
9317	733.966	2	0	1	0	0	0	0.0129739
9319	733.999	2	0	1	0	0	0	0.0129773
9321	734.032	2	0	1	0	0	0	0.0129688
9323	734.066	2	0	1	0	0	0	0.0129647
9325	734.099	2	0	1	0	0	0	0.012959
9327	734.132	2	0	1	0	0	0	0.0129218
9329	734.166	2	0	1	0	0	0	0.0129465
9331	734.199	2	0	1	0	0	0	0.0129309
9333	734.232	2	0	1	0	0	0	0.0129272
9335	734.266	2	0	1	0	0	0	0.0129437
9337	734.299	2	0	1	0	0	0	0.0129282
9339	734.332	2	0	1	0	0	0	0.0129752
9341	734.366	2	0	1	0	0	0	0.0129515
9343	734.399	2	0	1	0	0	0	0.0129654
9345	734.432	2	0	1	0	0	0	0.0130131
9347	734.466	2	0	1	0	0	0	0.0129952
9349	734.499	2	0	1	0	0	0	0.0129465
9351	734.532	2	0	1	0	0	0	0.0129302
9353	734.566	2	0	1	0	0	0	0.0128774
9355	734.599	2	0	1	0	0	0	0.0129282
9357	734.632	2	0	1	0	0	0	0.0128744
9359	734.666	2	0	1	0	0	0	0.0129461
9361	734.699	2	0	1	0	0	0	0.0129268
9363	734.732	2	0	1	0	0	0	0.0129177
9365	734.766	2	0	1	0	0	0	0.0129424
9367	734.799	2	0	1	0	0	0	0.0130196
9369	734.832	2	0	1	0	0	0	0.0130135
9371	734.866	2	0	1	0	0	0	0.0129627
9373	734.899	2	0	1	0	0	0	0.0130047
9375	734.932	2	0	1	0	0	0	0.013008
9377	734.966	2	0	1	0	0	0	0.0129915
9379	734.999	2	0	1	0	0	0	0.0130006
9381	735.032	2	0	1	0	0	0	0.0129722
9383	735.066	2	0	1	0	0	0	0.0130287
9385	735.099	2	0	1	0	0	0	0.0129972
9387	735.132	2	0	1	0	0	0	0.0130138
9389	735.166	2	0	1	0	0	0	0.0129948
9391	735.199	2	0	1	0	0	0	0.0130013
9393	735.232	2	0	1	0	0	0	0.0129921
9395	735.266	2	0	1	0	0	0	0.0129654
9397	735.299	2	0	1	0	0	0	0.0130124
9399	735.332	2	0	1	0	0	0	0.0129532
9401	735.366	2	0	1	0	0	0	0.0129932
9403	735.399	2	0	1	0	0	0	0.0130348
9405	735.432	2	0	1	0	0	0	0.0130131
9407	735.466	2	0	1	0	0	0	0.013046
9409	735.499	2	0	1	0	0	0	0.0130016
9411	735.532	2	0	1	0	0	0	0.0130202
9413	735.566	2	0	1	0	0	0	0.0130984
9415	735.599	2	0	1	0	0	0	0.0130196
9417	735.632	2	0	1	0	0	0	0.013028
9419	735.666	2	0	1	0	0	0	0.013024
9421	735.699	2	0	1	0	0	0	0.0129955
9423	735.732	2	0	1	0	0	0	0.0130402
9425	735.766	2	0	1	0	0	0	0.0130341
9427	735.799	2	0	1	0	0	0	0.0130009
9429	735.832	2	0	1	0	0	0	0.013025
9431	735.866	2	0	1	0	0	0	0.0129935
9433	735.899	2	0	1	0	0	0	0.0129938
9435	735.932	2	0	1	0	0	0	0.013005
9437	735.966	2	0	1	0	0	0	0.012937
9439	735.999	2	0	1	0	0	0	0.0129674
9441	736.032	2	0	1	0	0	0	0.0129874
9443	736.066	2	0	1	0	0	0	0.0129712
9445	736.099	2	0	1	0	0	0	0.0129986
9447	736.132	2	0	1	0	0	0	0.0130003
9449	736.166	2	0	1	0	0	0	0.0129593
9451	736.199	2	0	1	0	0	0	0.0129424
9453	736.232	2	0	1	0	0	0	0.0129627
9455	736.266	2	0	1	0	0	0	0.0129295
9457	736.299	2	0	1	0	0	0	0.0129485
9459	736.332	2	0	1	0	0	0	0.0129583
9461	736.366	2	0	1	0	0	0	0.012985
9463	736.399	2	0	1	0	0	0	0.0129698
9465	736.432	2	0	1	0	0	0	0.0129393
9467	736.466	2	0	1	0	0	0	0.0129556
9469	736.499	2	0	1	0	0	0	0.0129654
9471	736.532	2	0	1	0	0	0	0.0129302
9473	736.566	2	0	1	0	0	0	0.0129184
9475	736.599	2	0	1	0	0	0	0.0130067
9477	736.632	2	0	1	0	0	0	0.0129272
9479	736.666	2	0	1	0	0	0	0.0129559
9481	736.699	2	0	1	0	0	0	0.0129688
9483	736.732	2	0	1	0	0	0	0.0129427
9485	736.766	2	0	1	0	0	0	0.0129505
9487	736.799	2	0	1	0	0	0	0.0129014
9489	736.832	2	0	1	0	0	0	0.0129607
9491	736.866	2	0	1	0	0	0	0.0129668
9493	736.899	2	0	1	0	0	0	0.0129187
9495	736.932	2	0	1	0	0	0	0.012981
9497	736.966	2	0	1	0	0	0	0.0129563
9499	736.999	2	0	1	0	0	0	0.0129444
9501	737.032	2	0	1	0	0	0	0.0129515
9503	737.066	2	0	1	0	0	0	0.0129366
9505	737.099	2	0	1	0	0	0	0.0129421
9507	737.132	2	0	1	0	0	0	0.0128679
9509	737.166	2	0	1	0	0	0	0.0129272
9511	737.199	2	0	1	0	0	0	0.0128693
9513	737.232	2	0	1	0	0	0	0.0128845
9515	737.266	2	0	1	0	0	0	0.0129204
9517	737.299	2	0	1	0	0	0	0.0129333
9519	737.332	2	0	1	0	0	0	0.0129319
9521	737.366	2	0	1	0	0	0	0.0129292
9523	737.399	2	0	1	0	0	0	0.0128967
9525	737.432	2	0	1	0	0	0	0.0129045
9527	737.466	2	0	1	0	0	0	0.0129146
9529	737.499	2	0	1	0	0	0	0.0129363
9531	737.532	2	0	1	0	0	0	0.0129234
9533	737.566	2	0	1	0	0	0	0.0129065
9535	737.599	2	0	1	0	0	0	0.0128754
9537	737.632	2	0	1	0	0	0	0.0128889
9539	737.666	2	0	1	0	0	0	0.0128859
9541	737.699	2	0	1	0	0	0	0.0128889
9543	737.732	2	0	1	0	0	0	0.0128872
9545	737.766	2	0	1	0	0	0	0.012874
9547	737.799	2	0	1	0	0	0	0.0129255
9549	737.832	2	0	1	0	0	0	0.0128723
9551	737.866	2	0	1	0	0	0	0.0128828
9553	737.899	2	0	1	0	0	0	0.0128798
9555	737.932	2	0	1	0	0	0	0.012825
9557	737.966	2	0	1	0	0	0	0.0129092
9559	737.999	2	0	1	0	0	0	0.0128876
9561	738.032	2	0	1	0	0	0	0.0128591
9563	738.066	2	0	1	0	0	0	0.0129255
9565	738.099	2	0	1	0	0	0	0.0128585
9567	738.132	2	0	1	0	0	0	0.0128443
9569	738.166	2	0	1	0	0	0	0.0128605
9571	738.199	2	0	1	0	0	0	0.0128409
9573	738.232	2	0	1	0	0	0	0.0128964
9575	738.266	2	0	1	0	0	0	0.0129038
9577	738.299	2	0	1	0	0	0	0.0129136
9579	738.332	2	0	1	0	0	0	0.0128798
9581	738.366	2	0	1	0	0	0	0.0128612
9583	738.399	2	0	1	0	0	0	0.0128666
9585	738.432	2	0	1	0	0	0	0.0128862
9587	738.466	2	0	1	0	0	0	0.012849
9589	738.499	2	0	1	0	0	0	0.0129221
9591	738.532	2	0	1	0	0	0	0.0128974
9593	738.566	2	0	1	0	0	0	0.0129228
9595	738.599	2	0	1	0	0	0	0.0129377
9597	738.632	2	0	1	0	0	0	0.0129177
9599	738.666	2	0	1	0	0	0	0.0129421
9601	738.699	2	0	1	0	0	0	0.0129262
9603	738.732	2	0	1	0	0	0	0.0128981
9605	738.765	2	0	1	0	0	0	0.0128676
9607	738.799	2	0	1	0	0	0	0.0129668
9609	738.832	2	0	1	0	0	0	0.012918
9611	738.865	2	0	1	0	0	0	0.0128666
9613	738.899	2	0	1	0	0	0	0.0128916
9615	738.932	2	0	1	0	0	0	0.0128852
9617	738.965	2	0	1	0	0	0	0.0129082
9619	738.999	2	0	1	0	0	0	0.0128838
9621	739.032	2	0	1	0	0	0	0.012891
9623	739.065	2	0	1	0	0	0	0.0128629
9625	739.099	2	0	1	0	0	0	0.0128602
9627	739.132	2	0	1	0	0	0	0.0128625
9629	739.165	2	0	1	0	0	0	0.012869
9631	739.199	2	0	1	0	0	0	0.0128378
9633	739.232	2	0	1	0	0	0	0.0128937
9635	739.265	2	0	1	0	0	0	0.0128926
9637	739.299	2	0	1	0	0	0	0.0128547
9639	739.332	2	0	1	0	0	0	0.0128629
9641	739.365	2	0	1	0	0	0	0.0128676
9643	739.399	2	0	1	0	0	0	0.0128852
9645	739.432	2	0	1	0	0	0	0.0128903
9647	739.465	2	0	1	0	0	0	0.0128646
9649	739.499	2	0	1	0	0	0	0.0128913
9651	739.532	2	0	1	0	0	0	0.0129011
9653	739.565	2	0	1	0	0	0	0.0128825
9655	739.599	2	0	1	0	0	0	0.0128466
9657	739.632	2	0	1	0	0	0	0.0128838
9659	739.665	2	0	1	0	0	0	0.0128906
9661	739.699	2	0	1	0	0	0	0.0128767
9663	739.732	2	0	1	0	0	0	0.0129099
9665	739.765	2	0	1	0	0	0	0.0128152
9667	739.799	2	0	1	0	0	0	0.0128483
9669	739.832	2	0	1	0	0	0	0.0128453
9671	739.865	2	0	1	0	0	0	0.0128889
9673	739.899	2	0	1	0	0	0	0.0129031
9675	739.932	2	0	1	0	0	0	0.0128355
9677	739.965	2	0	1	0	0	0	0.0128531
9679	739.999	2	0	1	0	0	0	0.0129275
9681	740.032	2	0	1	0	0	0	0.0128808
9683	740.065	2	0	1	0	0	0	0.0128578
9685	740.099	2	0	1	0	0	0	0.0129194
9687	740.132	2	0	1	0	0	0	0.0128453
9689	740.165	2	0	1	0	0	0	0.0128104
9691	740.199	2	0	1	0	0	0	0.0128453
9693	740.232	2	0	1	0	0	0	0.0128602
9695	740.265	2	0	1	0	0	0	0.0128189
9697	740.299	2	0	1	0	0	0	0.0127972
9699	740.332	2	0	1	0	0	0	0.0128375
9701	740.365	2	0	1	0	0	0	0.0128219
9703	740.399	2	0	1	0	0	0	0.0128544
9705	740.432	2	0	1	0	0	0	0.0128206
9707	740.465	2	0	1	0	0	0	0.012827
9709	740.499	2	0	1	0	0	0	0.0127992
9711	740.532	2	0	1	0	0	0	0.0128189
9713	740.565	2	0	1	0	0	0	0.0127867
[truncated: 34,863 more rows]

## Sheet: Mouse 3_Event Trials
999.288416	Down	25237	44336121.2288	12:18:56.1212288

[truncated: 15 more sheets: Mouse 4_415 Signal, Mouse 4_470 Signal, Mouse 4_Event Trials, Mouse 5_415 Signal, Mouse 5_470 Signal, Mouse 5_Event Trials, Mouse 6_415 Signal, Mouse 6_470 Signal, Mouse 6_Event Trials, Mouse 7_415 Signal, Mouse 7_470 Signal, Mouse 7_Event Trials, Mouse 8_415 Signal, Mouse 8_470 Signal, Mouse 8_Event Trials]
