# Supplementary material for: Glutamatergic supramammillary nucleus neurons respond to threatening stressors and promote active coping
Source: eLife. 2024 Jun 3;12:RP90972. doi: 10.7554/eLife.90972 (PMC11147510; doi:10.7554/eLife.90972)
Supplement: Figure 8—source data 3. [file elife-90972-fig8-data3.xlsx]

## Sheet: Figure 8F
	Figure 8F. For each mouse, there are two worksheets (GCaMPs 470 and Isosbestic 415)

## Sheet: Mouse_1_415_Signal
FrameCounter	Timestamp	LedState	Stimulation	Output0	Output1	Input0	Input1	Region0G
7124	3203.5	1	0	1	0	0	0	0.014455
7126	3203.53	1	0	1	0	0	0	0.0144518
7128	3203.57	1	0	1	0	0	0	0.0144585
7130	3203.6	1	0	1	0	0	0	0.0144522
7132	3203.63	1	0	1	0	0	0	0.0145289
7134	3203.67	1	0	1	0	0	0	0.0144257
7136	3203.7	1	0	1	0	0	0	0.0144829
7138	3203.73	1	0	1	0	0	0	0.0144902
7140	3203.77	1	0	1	0	0	0	0.014675
7142	3203.8	1	0	1	0	0	0	0.0147116
7144	3203.83	1	0	1	0	0	0	0.0147298
7146	3203.87	1	0	1	0	0	0	0.0146677
7148	3203.9	1	0	1	0	0	0	0.0147399
7150	3203.93	1	0	1	0	0	0	0.0145844
7152	3203.97	1	0	1	0	0	0	0.0146255
7154	3204	1	0	1	0	0	0	0.0144979
7156	3204.03	1	0	1	0	0	0	0.0146412
7158	3204.07	1	0	1	0	0	0	0.0144885
7160	3204.1	1	0	1	0	0	0	0.0144041
7162	3204.13	1	0	1	0	0	0	0.0145035
7164	3204.17	1	0	1	0	0	0	0.0144076
7166	3204.2	1	0	1	0	0	0	0.0143947
7168	3204.23	1	0	1	0	0	0	0.0144578
7170	3204.27	1	0	1	0	0	0	0.0144801
7172	3204.3	1	0	1	0	0	0	0.0145334
7174	3204.33	1	0	1	0	0	0	0.0144142
7176	3204.37	1	0	1	0	0	0	0.0144553
7178	3204.4	1	0	1	0	0	0	0.0145767
7180	3204.43	1	0	1	0	0	0	0.0145868
7182	3204.47	1	0	1	0	0	0	0.014599
7184	3204.5	1	0	1	0	0	0	0.0145823
7186	3204.53	1	0	1	0	0	0	0.0145394
7188	3204.57	1	0	1	0	0	0	0.0145582
7190	3204.6	1	0	1	0	0	0	0.0145568
7192	3204.63	1	0	1	0	0	0	0.0145376
7194	3204.67	1	0	1	0	0	0	0.0144599
7196	3204.7	1	0	1	0	0	0	0.0144644
7198	3204.73	1	0	1	0	0	0	0.014494
7200	3204.77	1	0	1	0	0	0	0.0145293
7202	3204.8	1	0	1	0	0	0	0.0145376
7204	3204.83	1	0	1	0	0	0	0.0144205
7206	3204.87	1	0	1	0	0	0	0.0144641
7208	3204.9	1	0	1	0	0	0	0.0144539
7210	3204.93	1	0	1	0	0	0	0.014569
7212	3204.97	1	0	1	0	0	0	0.0145024
7214	3205	1	0	1	0	0	0	0.0146628
7216	3205.03	1	0	1	0	0	0	0.0145753
7218	3205.07	1	0	1	0	0	0	0.0144522
7220	3205.1	1	0	1	0	0	0	0.0145453
7222	3205.13	1	0	1	0	0	0	0.014562
7224	3205.17	1	0	1	0	0	0	0.0146963
7226	3205.2	1	0	1	0	0	0	0.0147521
7228	3205.23	1	0	1	0	0	0	0.0146956
7230	3205.27	1	0	1	0	0	0	0.0147479
7232	3205.3	1	0	1	0	0	0	0.0144358
7234	3205.33	1	0	1	0	0	0	0.0141523
7236	3205.37	1	0	1	0	0	0	0.0142322
7238	3205.4	1	0	1	0	0	0	0.0142081
7240	3205.43	1	0	1	0	0	0	0.0143922
7242	3205.47	1	0	1	0	0	0	0.0145181
7244	3205.5	1	0	1	0	0	0	0.0146011
7246	3205.53	1	0	1	0	0	0	0.0146733
7248	3205.57	1	0	1	0	0	0	0.0146813
7250	3205.6	1	0	1	0	0	0	0.0147305
7252	3205.63	1	0	1	0	0	0	0.0147535
7254	3205.67	1	0	1	0	0	0	0.0147911
7256	3205.7	1	0	1	0	0	0	0.0148347
7258	3205.73	1	0	1	0	0	0	0.0147615
7260	3205.77	1	0	1	0	0	0	0.0145432
7262	3205.8	1	0	1	0	0	0	0.0141398
7264	3205.83	1	0	1	0	0	0	0.0137806
7266	3205.87	1	0	1	0	0	0	0.0138517
7268	3205.9	1	0	1	0	0	0	0.0137848
7270	3205.93	1	0	1	0	0	0	0.0138563
7272	3205.97	1	0	1	0	0	0	0.0140428
7274	3206	1	0	1	0	0	0	0.0140275
7276	3206.03	1	0	1	0	0	0	0.0139748
7278	3206.07	1	0	1	0	0	0	0.0142346
7280	3206.1	1	0	1	0	0	0	0.0143329
7282	3206.13	1	0	1	0	0	0	0.0143692
7284	3206.17	1	0	1	0	0	0	0.0144661
7286	3206.2	1	0	1	0	0	0	0.0143898
7288	3206.23	1	0	1	0	0	0	0.0144424
7290	3206.27	1	0	1	0	0	0	0.0143528
7292	3206.3	1	0	1	0	0	0	0.0144002
7294	3206.33	1	0	1	0	0	0	0.0142214
7296	3206.37	1	0	1	0	0	0	0.0143772
7298	3206.4	1	0	1	0	0	0	0.0145007
7300	3206.43	1	0	1	0	0	0	0.0143458
7302	3206.47	1	0	1	0	0	0	0.0143284
7304	3206.5	1	0	1	0	0	0	0.0144522
7306	3206.53	1	0	1	0	0	0	0.0145097
7308	3206.57	1	0	1	0	0	0	0.0145516
7310	3206.6	1	0	1	0	0	0	0.0146231
7312	3206.63	1	0	1	0	0	0	0.0147322
7314	3206.67	1	0	1	0	0	0	0.0148176
7316	3206.7	1	0	1	0	0	0	0.0147943
7318	3206.73	1	0	1	0	0	0	0.0146987
7320	3206.77	1	0	1	0	0	0	0.0143852
7322	3206.8	1	0	1	0	0	0	0.0145606
7324	3206.83	1	0	1	0	0	0	0.0143936
7326	3206.87	1	0	1	0	0	0	0.0143054
7328	3206.9	1	0	1	0	0	0	0.0142559
7330	3206.93	1	0	1	0	0	0	0.0142283
7332	3206.97	1	0	1	0	0	0	0.0143451
7334	3207	1	0	1	0	0	0	0.0142468
7336	3207.03	1	0	1	0	0	0	0.0142845
7338	3207.07	1	0	1	0	0	0	0.0141907
7340	3207.1	1	0	1	0	0	0	0.0142527
7342	3207.13	1	0	1	0	0	0	0.0143012
7344	3207.17	1	0	1	0	0	0	0.0143288
7346	3207.2	1	0	1	0	0	0	0.0142416
7348	3207.23	1	0	1	0	0	0	0.0142186
7350	3207.27	1	0	1	0	0	0	0.0142276
7352	3207.3	1	0	1	0	0	0	0.0143933
7354	3207.33	1	0	1	0	0	0	0.0144002
7356	3207.37	1	0	1	0	0	0	0.0144763
7358	3207.4	1	0	1	0	0	0	0.0144696
7360	3207.43	1	0	1	0	0	0	0.014547
7362	3207.47	1	0	1	0	0	0	0.0146865
7364	3207.5	1	0	1	0	0	0	0.0144745
7366	3207.53	1	0	1	0	0	0	0.014146
7368	3207.57	1	0	1	0	0	0	0.0140184
7370	3207.6	1	0	1	0	0	0	0.0140665
7372	3207.63	1	0	1	0	0	0	0.0141077
7374	3207.67	1	0	1	0	0	0	0.014115
7376	3207.7	1	0	1	0	0	0	0.0141153
7378	3207.73	1	0	1	0	0	0	0.0142555
7380	3207.77	1	0	1	0	0	0	0.01435
7382	3207.8	1	0	1	0	0	0	0.0145223
7384	3207.83	1	0	1	0	0	0	0.0145369
7386	3207.87	1	0	1	0	0	0	0.0144986
7388	3207.9	1	0	1	0	0	0	0.0145735
7390	3207.93	1	0	1	0	0	0	0.0145596
7392	3207.97	1	0	1	0	0	0	0.0146869
7394	3208	1	0	1	0	0	0	0.0146381
7396	3208.03	1	0	1	0	0	0	0.0145624
7398	3208.07	1	0	1	0	0	0	0.0145729
7400	3208.1	1	0	1	0	0	0	0.0144714
7402	3208.13	1	0	1	0	0	0	0.01447
7404	3208.17	1	0	1	0	0	0	0.0144194
7406	3208.2	1	0	1	0	0	0	0.0144424
7408	3208.23	1	0	1	0	0	0	0.0142859
7410	3208.27	1	0	1	0	0	0	0.0142085
7412	3208.3	1	0	1	0	0	0	0.0140756
7414	3208.33	1	0	1	0	0	0	0.0140188
7416	3208.37	1	0	1	0	0	0	0.0139842
7418	3208.4	1	0	1	0	0	0	0.0140456
7420	3208.43	1	0	1	0	0	0	0.0139263
7422	3208.47	1	0	1	0	0	0	0.0138594
7424	3208.5	1	0	1	0	0	0	0.0139528
7426	3208.53	1	0	1	0	0	0	0.0140665
7428	3208.57	1	0	1	0	0	0	0.0140585
7430	3208.6	1	0	1	0	0	0	0.0140529
7432	3208.63	1	0	1	0	0	0	0.0141105
7434	3208.67	1	0	1	0	0	0	0.0140941
7436	3208.7	1	0	1	0	0	0	0.0141614
7438	3208.73	1	0	1	0	0	0	0.014054
7440	3208.77	1	0	1	0	0	0	0.0139888
7442	3208.8	1	0	1	0	0	0	0.0139229
7444	3208.83	1	0	1	0	0	0	0.0139832
7446	3208.87	1	0	1	0	0	0	0.0139637
7448	3208.9	1	0	1	0	0	0	0.0138542
7450	3208.93	1	0	1	0	0	0	0.0138322
7452	3208.97	1	0	1	0	0	0	0.0137834
7454	3209	1	0	1	0	0	0	0.0138064
7456	3209.03	1	0	1	0	0	0	0.0138224
7458	3209.07	1	0	1	0	0	0	0.0138437
7460	3209.1	1	0	1	0	0	0	0.0138971
7462	3209.13	1	0	1	0	0	0	0.0138556
7464	3209.17	1	0	1	0	0	0	0.0138123
7466	3209.2	1	0	1	0	0	0	0.0137788
7468	3209.23	1	0	1	0	0	0	0.0139759
7470	3209.27	1	0	1	0	0	0	0.0139051
7472	3209.3	1	0	1	0	0	0	0.0139487
7474	3209.33	1	0	1	0	0	0	0.013881
7476	3209.37	1	0	1	0	0	0	0.0140083
7478	3209.4	1	0	1	0	0	0	0.0140501
7480	3209.43	1	0	1	0	0	0	0.0139155
7482	3209.47	1	0	1	0	0	0	0.0139452
7484	3209.5	1	0	1	0	0	0	0.0137893
7486	3209.53	1	0	1	0	0	0	0.0136732
7488	3209.57	1	0	1	0	0	0	0.0137429
7490	3209.6	1	0	1	0	0	0	0.0138155
7492	3209.63	1	0	1	0	0	0	0.0137865
7494	3209.67	1	0	1	0	0	0	0.0137663
7496	3209.7	1	0	1	0	0	0	0.0136394
7498	3209.73	1	0	1	0	0	0	0.0135867
7500	3209.77	1	0	1	0	0	0	0.0134988
7502	3209.8	1	0	1	0	0	0	0.0135968
7504	3209.83	1	0	1	0	0	0	0.0136952
7506	3209.87	1	0	1	0	0	0	0.0136544
7508	3209.9	1	0	1	0	0	0	0.0136125
7510	3209.93	1	0	1	0	0	0	0.013547
7512	3209.97	1	0	1	0	0	0	0.0134151
7514	3210	1	0	1	0	0	0	0.0135368
7516	3210.03	1	0	1	0	0	0	0.0136097
7518	3210.07	1	0	1	0	0	0	0.0136261
7520	3210.1	1	0	1	0	0	0	0.0136048
7522	3210.13	1	0	1	0	0	0	0.0134915
7524	3210.17	1	0	1	0	0	0	0.0133869
7526	3210.2	1	0	1	0	0	0	0.0133308
7528	3210.23	1	0	1	0	0	0	0.0134228
7530	3210.27	1	0	1	0	0	0	0.0135239
7532	3210.3	1	0	1	0	0	0	0.0134898
7534	3210.33	1	0	1	0	0	0	0.0137642
7536	3210.37	1	0	1	0	0	0	0.0138182
7538	3210.4	1	0	1	0	0	0	0.013835
7540	3210.43	1	0	1	0	0	0	0.0137244
7542	3210.47	1	0	1	0	0	0	0.0134674
7544	3210.5	1	0	1	0	0	0	0.0134434
7546	3210.53	1	0	1	0	0	0	0.0134657
7548	3210.57	1	0	1	0	0	0	0.0136069
7550	3210.6	1	0	1	0	0	0	0.0135811
7552	3210.63	1	0	1	0	0	0	0.0140439
7554	3210.67	1	0	1	0	0	0	0.0144278
7556	3210.7	1	0	1	0	0	0	0.014288
7558	3210.73	1	0	1	0	0	0	0.014312
7560	3210.77	1	0	1	0	0	0	0.0146279
7562	3210.8	1	0	1	0	0	0	0.0147033
7564	3210.83	1	0	1	0	0	0	0.0146858
7566	3210.87	1	0	1	0	0	0	0.0145432
7568	3210.9	1	0	1	0	0	0	0.0145233
7570	3210.93	1	0	1	0	0	0	0.0145551
7572	3210.97	1	0	1	0	0	0	0.0146004
7574	3211	1	0	1	0	0	0	0.0141886
7576	3211.03	1	0	1	0	0	0	0.0139919
7578	3211.07	1	0	1	0	0	0	0.0138828
7580	3211.1	1	0	1	0	0	0	0.0136066
7582	3211.13	1	0	1	0	0	0	0.0138144
7584	3211.17	1	0	1	0	0	0	0.0136453
7586	3211.2	1	0	1	0	0	0	0.013434
7588	3211.23	1	0	1	0	0	0	0.0136456
7590	3211.27	1	0	1	0	0	0	0.0136931
7592	3211.3	1	0	1	0	0	0	0.0137014
7594	3211.33	1	0	1	0	0	0	0.0139452
7596	3211.37	1	0	1	0	0	0	0.0138842
7598	3211.4	1	0	1	0	0	0	0.0138461
7600	3211.43	1	0	1	0	0	0	0.0140177
7602	3211.47	1	0	1	0	0	0	0.0140868
7604	3211.5	1	0	1	0	0	0	0.013919
7606	3211.53	1	0	1	0	0	0	0.0139546
7608	3211.57	1	0	1	0	0	0	0.0141338
7610	3211.6	1	0	1	0	0	0	0.0140243
7612	3211.63	1	0	1	0	0	0	0.0141673
7614	3211.67	1	0	1	0	0	0	0.0143528
7616	3211.7	1	0	1	0	0	0	0.0142803
7618	3211.73	1	0	1	0	0	0	0.0142032
7620	3211.77	1	0	1	0	0	0	0.0142207
7622	3211.8	1	0	1	0	0	0	0.013963
7624	3211.83	1	0	1	0	0	0	0.0138632
7626	3211.87	1	0	1	0	0	0	0.014078
7628	3211.9	1	0	1	0	0	0	0.0139204
7630	3211.93	1	0	1	0	0	0	0.0138699
7632	3211.97	1	0	1	0	0	0	0.0139783
7634	3212	1	0	1	0	0	0	0.0137757
7636	3212.03	1	0	1	0	0	0	0.0138706
7638	3212.07	1	0	1	0	0	0	0.0138737
7640	3212.1	1	0	1	0	0	0	0.0137907
7642	3212.13	1	0	1	0	0	0	0.0139162
7644	3212.17	1	0	1	0	0	0	0.0139633
7646	3212.2	1	0	1	0	0	0	0.0139316
7648	3212.23	1	0	1	0	0	0	0.0139469
7650	3212.27	1	0	1	0	0	0	0.0142088
7652	3212.3	1	0	1	0	0	0	0.0141949
7654	3212.33	1	0	1	0	0	0	0.0142391
7656	3212.37	1	0	1	0	0	0	0.0143036
7658	3212.4	1	0	1	0	0	0	0.0142444
7660	3212.43	1	0	1	0	0	0	0.014304
7662	3212.47	1	0	1	0	0	0	0.0143493
7664	3212.5	1	0	1	0	0	0	0.0142419
7666	3212.53	1	0	1	0	0	0	0.0141178
7668	3212.57	1	0	1	0	0	0	0.0140097
7670	3212.6	1	0	1	0	0	0	0.0141321
7672	3212.63	1	0	1	0	0	0	0.0140847
7674	3212.67	1	0	1	0	0	0	0.014115
7676	3212.7	1	0	1	0	0	0	0.0141066
7678	3212.73	1	0	1	0	0	0	0.0139902
7680	3212.77	1	0	1	0	0	0	0.01407
7682	3212.8	1	0	1	0	0	0	0.0138196
7684	3212.83	1	0	1	0	0	0	0.0138482
7686	3212.87	1	0	1	0	0	0	0.0139061
7688	3212.9	1	0	1	0	0	0	0.0137213
7690	3212.93	1	0	1	0	0	0	0.0138535
7692	3212.97	1	0	1	0	0	0	0.0142873
7694	3213	1	0	1	0	0	0	0.0143633
7696	3213.03	1	0	1	0	0	0	0.014409
7698	3213.07	1	0	1	0	0	0	0.014515
7700	3213.1	1	0	1	0	0	0	0.0145233
7702	3213.13	1	0	1	0	0	0	0.0144815
7704	3213.17	1	0	1	0	0	0	0.0145007
7706	3213.2	1	0	1	0	0	0	0.0143023
7708	3213.23	1	0	1	0	0	0	0.0144909
7710	3213.27	1	0	1	0	0	0	0.0144072
7712	3213.3	1	0	1	0	0	0	0.0143152
7714	3213.33	1	0	1	0	0	0	0.0142894
7716	3213.37	1	0	1	0	0	0	0.0142862
7718	3213.4	1	0	1	0	0	0	0.0139818
7720	3213.43	1	0	1	0	0	0	0.0137785
7722	3213.47	1	0	1	0	0	0	0.0139124
7724	3213.5	1	0	1	0	0	0	0.0138427
7726	3213.53	1	0	1	0	0	0	0.0137506
7728	3213.57	1	0	1	0	0	0	0.013994
7730	3213.6	1	0	1	0	0	0	0.013873
7732	3213.63	1	0	1	0	0	0	0.0139358
7734	3213.67	1	0	1	0	0	0	0.0140641
7736	3213.7	1	0	1	0	0	0	0.0138329
7738	3213.73	1	0	1	0	0	0	0.0138451
7740	3213.77	1	0	1	0	0	0	0.013865
7742	3213.8	1	0	1	0	0	0	0.0138538
7744	3213.83	1	0	1	0	0	0	0.0137262
7746	3213.87	1	0	1	0	0	0	0.0139399
7748	3213.9	1	0	1	0	0	0	0.0138925
7750	3213.93	1	0	1	0	0	0	0.0139005
7752	3213.97	1	0	1	0	0	0	0.0140212
7754	3214	1	0	1	0	0	0	0.0138925
7756	3214.03	1	0	1	0	0	0	0.0137353
7758	3214.07	1	0	1	0	0	0	0.0138719
7760	3214.1	1	0	1	0	0	0	0.0140027
7762	3214.13	1	0	1	0	0	0	0.0138545
7764	3214.17	1	0	1	0	0	0	0.0137799
7766	3214.2	1	0	1	0	0	0	0.0138971
7768	3214.23	1	0	1	0	0	0	0.0136906
7770	3214.27	1	0	1	0	0	0	0.0137311
7772	3214.3	1	0	1	0	0	0	0.0138514
7774	3214.33	1	0	1	0	0	0	0.0138894
7776	3214.37	1	0	1	0	0	0	0.013934
7778	3214.4	1	0	1	0	0	0	0.0139288
7780	3214.43	1	0	1	0	0	0	0.0139441
7782	3214.47	1	0	1	0	0	0	0.0139215
7784	3214.5	1	0	1	0	0	0	0.0138475
7786	3214.53	1	0	1	0	0	0	0.0139194
7788	3214.57	1	0	1	0	0	0	0.0139236
7790	3214.6	1	0	1	0	0	0	0.0139218
7792	3214.63	1	0	1	0	0	0	0.0139295
7794	3214.67	1	0	1	0	0	0	0.0138988
7796	3214.7	1	0	1	0	0	0	0.0139469
7798	3214.73	1	0	1	0	0	0	0.0140093
7800	3214.77	1	0	1	0	0	0	0.0140257
7802	3214.8	1	0	1	0	0	0	0.0140425
7804	3214.83	1	0	1	0	0	0	0.0139323
7806	3214.87	1	0	1	0	0	0	0.0138984
7808	3214.9	1	0	1	0	0	0	0.0139141
7810	3214.93	1	0	1	0	0	0	0.0139204
7812	3214.97	1	0	1	0	0	0	0.0139916
7814	3215	1	0	1	0	0	0	0.0139079
7816	3215.03	1	0	1	0	0	0	0.0138472
7818	3215.07	1	0	1	0	0	0	0.0139033
7820	3215.1	1	0	1	0	0	0	0.0138873
7822	3215.13	1	0	1	0	0	0	0.0137014
7824	3215.17	1	0	1	0	0	0	0.0137126
7826	3215.2	1	0	1	0	0	0	0.0138454
7828	3215.23	1	0	1	0	0	0	0.0138224
7830	3215.27	1	0	1	0	0	0	0.0137938
7832	3215.3	1	0	1	0	0	0	0.01398
7834	3215.33	1	0	1	0	0	0	0.0139609
7836	3215.37	1	0	1	0	0	0	0.0137265
7838	3215.4	1	0	1	0	0	0	0.0139065
7840	3215.43	1	0	1	0	0	0	0.0136484
7842	3215.47	1	0	1	0	0	0	0.013375
7844	3215.5	1	0	1	0	0	0	0.013638
7846	3215.53	1	0	1	0	0	0	0.0135138
7848	3215.57	1	0	1	0	0	0	0.0133831
7850	3215.6	1	0	1	0	0	0	0.0135797
7852	3215.63	1	0	1	0	0	0	0.013631
7854	3215.67	1	0	1	0	0	0	0.0137998
7856	3215.7	1	0	1	0	0	0	0.0140201
7858	3215.73	1	0	1	0	0	0	0.0141907
7860	3215.77	1	0	1	0	0	0	0.0141663
7862	3215.8	1	0	1	0	0	0	0.0142252
7864	3215.83	1	0	1	0	0	0	0.0142046
7866	3215.87	1	0	1	0	0	0	0.014153
7868	3215.9	1	0	1	0	0	0	0.014221
7870	3215.93	1	0	1	0	0	0	0.0141401
7872	3215.97	1	0	1	0	0	0	0.0141683
7874	3216	1	0	1	0	0	0	0.014183
7876	3216.03	1	0	1	0	0	0	0.0140923
7878	3216.07	1	0	1	0	0	0	0.0141631
7880	3216.1	1	0	1	0	0	0	0.0142283
7882	3216.13	1	0	1	0	0	0	0.0141994
7884	3216.17	1	0	1	0	0	0	0.0141645
7886	3216.2	1	0	1	0	0	0	0.0140829
7888	3216.23	1	0	1	0	0	0	0.0141258
7890	3216.27	1	0	1	0	0	0	0.0141645
7892	3216.3	1	0	1	0	0	0	0.014131
7894	3216.33	1	0	1	0	0	0	0.0141722
7896	3216.37	1	0	1	0	0	0	0.0141359
7898	3216.4	1	0	1	0	0	0	0.0141244
7900	3216.43	1	0	1	0	0	0	0.0141272
7902	3216.47	1	0	1	0	0	0	0.0140386
7904	3216.5	1	0	1	0	0	0	0.0140738
7906	3216.53	1	0	1	0	0	0	0.0140909
7908	3216.57	1	0	1	0	0	0	0.0140955
7910	3216.6	1	0	1	0	0	0	0.0141816
7912	3216.63	1	0	1	0	0	0	0.0141359
7914	3216.67	1	0	1	0	0	0	0.0141408
7916	3216.7	1	0	1	0	0	0	0.0141432
7918	3216.73	1	0	1	0	0	0	0.0140916
7920	3216.77	1	0	1	0	0	0	0.0141112
7922	3216.8	1	0	1	0	0	0	0.0141157
7924	3216.83	1	0	1	0	0	0	0.0141806
7926	3216.87	1	0	1	0	0	0	0.0140923
7928	3216.9	1	0	1	0	0	0	0.0139201
7930	3216.93	1	0	1	0	0	0	0.0141157
7932	3216.97	1	0	1	0	0	0	0.0141931
7934	3217	1	0	1	0	0	0	0.0142297
7936	3217.03	1	0	1	0	0	0	0.0143723
7938	3217.07	1	0	1	0	0	0	0.0145561
7940	3217.1	1	0	1	0	0	0	0.0144522
7942	3217.13	1	0	1	0	0	0	0.014433
7944	3217.17	1	0	1	0	0	0	0.0143988
7946	3217.2	1	0	1	0	0	0	0.0143685
7948	3217.23	1	0	1	0	0	0	0.0141896
7950	3217.27	1	0	1	0	0	0	0.0138127
7952	3217.3	1	0	1	0	0	0	0.0135933
7954	3217.33	1	0	1	0	0	0	0.0137143
7956	3217.37	1	0	1	0	0	0	0.0136976
7958	3217.4	1	0	1	0	0	0	0.0137719
7960	3217.43	1	0	1	0	0	0	0.0138057
7962	3217.47	1	0	1	0	0	0	0.0137806
7964	3217.5	1	0	1	0	0	0	0.0135965
7966	3217.53	1	0	1	0	0	0	0.0139197
7968	3217.57	1	0	1	0	0	0	0.0139584
7970	3217.6	1	0	1	0	0	0	0.013851
7972	3217.63	1	0	1	0	0	0	0.0137754
7974	3217.67	1	0	1	0	0	0	0.0138046
7976	3217.7	1	0	1	0	0	0	0.0138322
7978	3217.73	1	0	1	0	0	0	0.0138604
7980	3217.77	1	0	1	0	0	0	0.0138074
7982	3217.8	1	0	1	0	0	0	0.0141101
7984	3217.83	1	0	1	0	0	0	0.0145885
7986	3217.87	1	0	1	0	0	0	0.0145376
7988	3217.9	1	0	1	0	0	0	0.0146248
7990	3217.93	1	0	1	0	0	0	0.0147242
7992	3217.97	1	0	1	0	0	0	0.0146259
7994	3218	1	0	1	0	0	0	0.0142733
7996	3218.03	1	0	1	0	0	0	0.0141882
7998	3218.07	1	0	1	0	0	0	0.0138747
8000	3218.1	1	0	1	0	0	0	0.0138779
8002	3218.13	1	0	1	0	0	0	0.0140749
8004	3218.17	1	0	1	0	0	0	0.0140892
8006	3218.2	1	0	1	0	0	0	0.0140432
8008	3218.23	1	0	1	0	0	0	0.0141802
8010	3218.27	1	0	1	0	0	0	0.0141833
8012	3218.3	1	0	1	0	0	0	0.014229
8014	3218.33	1	0	1	0	0	0	0.0143308
8016	3218.37	1	0	1	0	0	0	0.0144473
8018	3218.4	1	0	1	0	0	0	0.0143657
8020	3218.43	1	0	1	0	0	0	0.0142259
8022	3218.47	1	0	1	0	0	0	0.014273
8024	3218.5	1	0	1	0	0	0	0.0143462
8026	3218.53	1	0	1	0	0	0	0.0143312
8028	3218.57	1	0	1	0	0	0	0.0142907
8030	3218.6	1	0	1	0	0	0	0.0141488
8032	3218.63	1	0	1	0	0	0	0.0142398
8034	3218.67	1	0	1	0	0	0	0.0141847
8036	3218.7	1	0	1	0	0	0	0.01407
8038	3218.73	1	0	1	0	0	0	0.0139148
8040	3218.77	1	0	1	0	0	0	0.013828
8042	3218.8	1	0	1	0	0	0	0.0137872
8044	3218.83	1	0	1	0	0	0	0.0137482
8046	3218.87	1	0	1	0	0	0	0.0139072
8048	3218.9	1	0	1	0	0	0	0.0138636
8050	3218.93	1	0	1	0	0	0	0.0136864
8052	3218.97	1	0	1	0	0	0	0.0137558
8054	3219	1	0	1	0	0	0	0.0137942
8056	3219.03	1	0	1	0	0	0	0.0137401
8058	3219.07	1	0	1	0	0	0	0.0137122
8060	3219.1	1	0	1	0	0	0	0.0136892
8062	3219.13	1	0	1	0	0	0	0.0136687
8064	3219.17	1	0	1	0	0	0	0.0137004
8066	3219.2	1	0	1	0	0	0	0.0137377
8068	3219.23	1	0	1	0	0	0	0.0137157
8070	3219.27	1	0	1	0	0	0	0.0137032
8072	3219.3	1	0	1	0	0	0	0.0137101
8074	3219.33	1	0	1	0	0	0	0.0136687
8076	3219.37	1	0	1	0	0	0	0.0137339
8078	3219.4	1	0	1	0	0	0	0.013745
8080	3219.43	1	0	1	0	0	0	0.0136767
8082	3219.47	1	0	1	0	0	0	0.0137067
8084	3219.5	1	0	1	0	0	0	0.0136683
8086	3219.53	1	0	1	0	0	0	0.0136432
8088	3219.57	1	0	1	0	0	0	0.0137189
8090	3219.6	1	0	1	0	0	0	0.013668
8092	3219.63	1	0	1	0	0	0	0.0136603
8094	3219.67	1	0	1	0	0	0	0.0136854
8096	3219.7	1	0	1	0	0	0	0.0136652
8098	3219.73	1	0	1	0	0	0	0.0137377
8100	3219.77	1	0	1	0	0	0	0.0137084
8102	3219.8	1	0	1	0	0	0	0.0139731
8104	3219.83	1	0	1	0	0	0	0.0140487
8106	3219.87	1	0	1	0	0	0	0.0141269
8108	3219.9	1	0	1	0	0	0	0.0142172
8110	3219.93	1	0	1	0	0	0	0.0141513
8112	3219.97	1	0	1	0	0	0	0.0139602
8114	3220	1	0	1	0	0	0	0.0139417
8116	3220.03	1	0	1	0	0	0	0.0139664
8118	3220.07	1	0	1	0	0	0	0.0140299
8120	3220.1	1	0	1	0	0	0	0.0140303
8122	3220.13	1	0	1	0	0	0	0.0138053
8124	3220.17	1	0	1	0	0	0	0.0140515
8126	3220.2	1	0	1	0	0	0	0.01398
8128	3220.23	1	0	1	0	0	0	0.0139793
8130	3220.27	1	0	1	0	0	0	0.0141108
8132	3220.3	1	0	1	0	0	0	0.0140041
8134	3220.33	1	0	1	0	0	0	0.0140759
8136	3220.37	1	0	1	0	0	0	0.0141924
8138	3220.4	1	0	1	0	0	0	0.0139971
8140	3220.43	1	0	1	0	0	0	0.0140916
8142	3220.47	1	0	1	0	0	0	0.0141279
8144	3220.5	1	0	1	0	0	0	0.0139508
8146	3220.53	1	0	1	0	0	0	0.0141073
8148	3220.57	1	0	1	0	0	0	0.0140215
8150	3220.6	1	0	1	0	0	0	0.0140365
8152	3220.63	1	0	1	0	0	0	0.0140125
8154	3220.67	1	0	1	0	0	0	0.0140453
8156	3220.7	1	0	1	0	0	0	0.0141314
8158	3220.73	1	0	1	0	0	0	0.0137952
8160	3220.77	1	0	1	0	0	0	0.0138726
8162	3220.8	1	0	1	0	0	0	0.0140292
8164	3220.83	1	0	1	0	0	0	0.013827
8166	3220.87	1	0	1	0	0	0	0.0139145
8168	3220.9	1	0	1	0	0	0	0.0140484
8170	3220.93	1	0	1	0	0	0	0.0139528
8172	3220.97	1	0	1	0	0	0	0.0141962
8174	3221	1	0	1	0	0	0	0.0142939
8176	3221.03	1	0	1	0	0	0	0.0142635
8178	3221.07	1	0	1	0	0	0	0.0141359
8180	3221.1	1	0	1	0	0	0	0.014244
8182	3221.13	1	0	1	0	0	0	0.0139347
8184	3221.17	1	0	1	0	0	0	0.0136627
8186	3221.2	1	0	1	0	0	0	0.0138869
8188	3221.23	1	0	1	0	0	0	0.0137917
8190	3221.27	1	0	1	0	0	0	0.0136952
8192	3221.3	1	0	1	0	0	0	0.0137318
8194	3221.33	1	0	1	0	0	0	0.0140854
8196	3221.37	1	0	1	0	0	0	0.0141778
8198	3221.4	1	0	1	0	0	0	0.014169
8200	3221.43	1	0	1	0	0	0	0.0141084
8202	3221.47	1	0	1	0	0	0	0.0142214
8204	3221.5	1	0	1	0	0	0	0.0143152
8206	3221.53	1	0	1	0	0	0	0.0143601
8208	3221.57	1	0	1	0	0	0	0.01438
8210	3221.6	1	0	1	0	0	0	0.0144051
8212	3221.63	1	0	1	0	0	0	0.0142081
8214	3221.67	1	0	1	0	0	0	0.014259
8216	3221.7	1	0	1	0	0	0	0.0143657
8218	3221.73	1	0	1	0	0	0	0.014281
8220	3221.77	1	0	1	0	0	0	0.0142862
8222	3221.8	1	0	1	0	0	0	0.0142423
8224	3221.83	1	0	1	0	0	0	0.0142499
8226	3221.87	1	0	1	0	0	0	0.0142632
8228	3221.9	1	0	1	0	0	0	0.0142859
8230	3221.93	1	0	1	0	0	0	0.0143336
8232	3221.97	1	0	1	0	0	0	0.0144034
8234	3222	1	0	1	0	0	0	0.0142914
8236	3222.03	1	0	1	0	0	0	0.0142583
8238	3222.07	1	0	1	0	0	0	0.0144065
8240	3222.1	1	0	1	0	0	0	0.0143211
8242	3222.13	1	0	1	0	0	0	0.0144696
8244	3222.17	1	0	1	0	0	0	0.0144745
8246	3222.2	1	0	1	0	0	0	0.0145181
8248	3222.23	1	0	1	0	0	0	0.0144466
8250	3222.27	1	0	1	0	0	0	0.0142534
8252	3222.3	1	0	1	0	0	0	0.0144264
8254	3222.33	1	0	1	0	0	0	0.014319
8256	3222.37	1	0	1	0	0	0	0.0143417
8258	3222.4	1	0	1	0	0	0	0.0145125
8260	3222.43	1	0	1	0	0	0	0.0142848
8262	3222.47	1	0	1	0	0	0	0.0143689
8264	3222.5	1	0	1	0	0	0	0.0143863
8266	3222.53	1	0	1	0	0	0	0.0144083
8268	3222.57	1	0	1	0	0	0	0.0145924
8270	3222.6	1	0	1	0	0	0	0.0144463
8272	3222.63	1	0	1	0	0	0	0.0144114
8274	3222.67	1	0	1	0	0	0	0.0144505
8276	3222.7	1	0	1	0	0	0	0.014341
8278	3222.73	1	0	1	0	0	0	0.0140149
8280	3222.77	1	0	1	0	0	0	0.0140718
8282	3222.8	1	0	1	0	0	0	0.0137788
8284	3222.83	1	0	1	0	0	0	0.0136296
8286	3222.87	1	0	1	0	0	0	0.0137991
8288	3222.9	1	0	1	0	0	0	0.0135435
8290	3222.93	1	0	1	0	0	0	0.0135919
8292	3222.97	1	0	1	0	0	0	0.0138817
8294	3223	1	0	1	0	0	0	0.0138371
8296	3223.03	1	0	1	0	0	0	0.013821
8298	3223.07	1	0	1	0	0	0	0.0138123
8300	3223.1	1	0	1	0	0	0	0.0139201
8302	3223.13	1	0	1	0	0	0	0.0139462
8304	3223.17	1	0	1	0	0	0	0.0138632
8306	3223.2	1	0	1	0	0	0	0.0139528
8308	3223.23	1	0	1	0	0	0	0.0137447
8310	3223.27	1	0	1	0	0	0	0.013723
8312	3223.3	1	0	1	0	0	0	0.0138242
8314	3223.33	1	0	1	0	0	0	0.0137949
8316	3223.37	1	0	1	0	0	0	0.013684
8318	3223.4	1	0	1	0	0	0	0.0141495
8320	3223.43	1	0	1	0	0	0	0.0141338
8322	3223.47	1	0	1	0	0	0	0.0139588
8324	3223.5	1	0	1	0	0	0	0.0136976
8326	3223.53	1	0	1	0	0	0	0.0134225
8328	3223.57	1	0	1	0	0	0	0.0135089
8330	3223.6	1	0	1	0	0	0	0.0135204
8332	3223.63	1	0	1	0	0	0	0.013593
8334	3223.66	1	0	1	0	0	0	0.013654
8336	3223.7	1	0	1	0	0	0	0.0136707
8338	3223.73	1	0	1	0	0	0	0.0136603
8340	3223.76	1	0	1	0	0	0	0.0137373
8342	3223.8	1	0	1	0	0	0	0.013805
8344	3223.83	1	0	1	0	0	0	0.013736
8346	3223.86	1	0	1	0	0	0	0.0138597
8348	3223.9	1	0	1	0	0	0	0.0138067
8350	3223.93	1	0	1	0	0	0	0.013707
8352	3223.96	1	0	1	0	0	0	0.0139194
8354	3224	1	0	1	0	0	0	0.0138305
8356	3224.03	1	0	1	0	0	0	0.0136868
8358	3224.06	1	0	1	0	0	0	0.0139239
8360	3224.1	1	0	1	0	0	0	0.0139054
8362	3224.13	1	0	1	0	0	0	0.013949
8364	3224.16	1	0	1	0	0	0	0.0140529
8366	3224.2	1	0	1	0	0	0	0.0141338
8368	3224.23	1	0	1	0	0	0	0.0142074
8370	3224.26	1	0	1	0	0	0	0.0142541
8372	3224.3	1	0	1	0	0	0	0.014183
8374	3224.33	1	0	1	0	0	0	0.0140997
8376	3224.36	1	0	1	0	0	0	0.014092
8378	3224.4	1	0	1	0	0	0	0.0142705
8380	3224.43	1	0	1	0	0	0	0.0140616
8382	3224.46	1	0	1	0	0	0	0.0140658
8384	3224.5	1	0	1	0	0	0	0.0142332
8386	3224.53	1	0	1	0	0	0	0.0142343
8388	3224.56	1	0	1	0	0	0	0.014387
8390	3224.6	1	0	1	0	0	0	0.0143852
8392	3224.63	1	0	1	0	0	0	0.0141781
8394	3224.66	1	0	1	0	0	0	0.014175
8396	3224.7	1	0	1	0	0	0	0.0142036
8398	3224.73	1	0	1	0	0	0	0.0139755
8400	3224.76	1	0	1	0	0	0	0.0138932
8402	3224.8	1	0	1	0	0	0	0.0139846
8404	3224.83	1	0	1	0	0	0	0.0139685
8406	3224.86	1	0	1	0	0	0	0.0139288
8408	3224.9	1	0	1	0	0	0	0.0142353
8410	3224.93	1	0	1	0	0	0	0.0141903
8412	3224.96	1	0	1	0	0	0	0.0142336
8414	3225	1	0	1	0	0	0	0.0143549
8416	3225.03	1	0	1	0	0	0	0.0144233
8418	3225.06	1	0	1	0	0	0	0.014531
8420	3225.1	1	0	1	0	0	0	0.0143999
8422	3225.13	1	0	1	0	0	0	0.0141931
8424	3225.16	1	0	1	0	0	0	0.014152
8426	3225.2	1	0	1	0	0	0	0.0140432
8428	3225.23	1	0	1	0	0	0	0.0139727
8430	3225.26	1	0	1	0	0	0	0.0140892
8432	3225.3	1	0	1	0	0	0	0.0140508
8434	3225.33	1	0	1	0	0	0	0.0139044
8436	3225.36	1	0	1	0	0	0	0.0139814
8438	3225.4	1	0	1	0	0	0	0.0138894
8440	3225.43	1	0	1	0	0	0	0.0139518
8442	3225.46	1	0	1	0	0	0	0.0138943
8444	3225.5	1	0	1	0	0	0	0.0139717
8446	3225.53	1	0	1	0	0	0	0.013971
8448	3225.56	1	0	1	0	0	0	0.0138699
8450	3225.6	1	0	1	0	0	0	0.0140554
8452	3225.63	1	0	1	0	0	0	0.0139525
8454	3225.66	1	0	1	0	0	0	0.0141523
8456	3225.7	1	0	1	0	0	0	0.0141771
8458	3225.73	1	0	1	0	0	0	0.0142932
8460	3225.76	1	0	1	0	0	0	0.0143169
8462	3225.8	1	0	1	0	0	0	0.0142573
8464	3225.83	1	0	1	0	0	0	0.014379
8466	3225.86	1	0	1	0	0	0	0.0145282
8468	3225.9	1	0	1	0	0	0	0.0143709
8470	3225.93	1	0	1	0	0	0	0.0141502
8472	3225.96	1	0	1	0	0	0	0.0141924
8474	3226	1	0	1	0	0	0	0.0140609
8476	3226.03	1	0	1	0	0	0	0.0138876
8478	3226.06	1	0	1	0	0	0	0.0140344
8480	3226.1	1	0	1	0	0	0	0.0138517
8482	3226.13	1	0	1	0	0	0	0.0138294
8484	3226.16	1	0	1	0	0	0	0.0139598
8486	3226.2	1	0	1	0	0	0	0.0137429
8488	3226.23	1	0	1	0	0	0	0.0139026
8490	3226.26	1	0	1	0	0	0	0.0139309
8492	3226.3	1	0	1	0	0	0	0.0138821
8494	3226.33	1	0	1	0	0	0	0.0138367
8496	3226.36	1	0	1	0	0	0	0.0139316
8498	3226.4	1	0	1	0	0	0	0.0139246
8500	3226.43	1	0	1	0	0	0	0.0138873
8502	3226.46	1	0	1	0	0	0	0.0139619
8504	3226.5	1	0	1	0	0	0	0.0139291
8506	3226.53	1	0	1	0	0	0	0.0139361
8508	3226.56	1	0	1	0	0	0	0.0139877
8510	3226.6	1	0	1	0	0	0	0.0138862
8512	3226.63	1	0	1	0	0	0	0.013994
8514	3226.66	1	0	1	0	0	0	0.0140278
8516	3226.7	1	0	1	0	0	0	0.013896
8518	3226.73	1	0	1	0	0	0	0.0137663
8520	3226.76	1	0	1	0	0	0	0.0142737
8522	3226.8	1	0	1	0	0	0	0.0143542
8524	3226.83	1	0	1	0	0	0	0.0142813
8526	3226.86	1	0	1	0	0	0	0.014235
8528	3226.9	1	0	1	0	0	0	0.0141485
8530	3226.93	1	0	1	0	0	0	0.0141924
8532	3226.96	1	0	1	0	0	0	0.0140609
8534	3227	1	0	1	0	0	0	0.0140254
8536	3227.03	1	0	1	0	0	0	0.0141157
8538	3227.06	1	0	1	0	0	0	0.0141886
8540	3227.1	1	0	1	0	0	0	0.0142918
8542	3227.13	1	0	1	0	0	0	0.0143211
8544	3227.16	1	0	1	0	0	0	0.0143762
8546	3227.2	1	0	1	0	0	0	0.0140065
8548	3227.23	1	0	1	0	0	0	0.0137687
8550	3227.26	1	0	1	0	0	0	0.0140529
8552	3227.3	1	0	1	0	0	0	0.0140836
8554	3227.33	1	0	1	0	0	0	0.0142311
8556	3227.36	1	0	1	0	0	0	0.0142928
8558	3227.4	1	0	1	0	0	0	0.0143587
8560	3227.43	1	0	1	0	0	0	0.0144442
8562	3227.46	1	0	1	0	0	0	0.0144846
8564	3227.5	1	0	1	0	0	0	0.0143514
8566	3227.53	1	0	1	0	0	0	0.0143005
8568	3227.56	1	0	1	0	0	0	0.0143968
8570	3227.6	1	0	1	0	0	0	0.0142189
8572	3227.63	1	0	1	0	0	0	0.014304
8574	3227.66	1	0	1	0	0	0	0.0144138
8576	3227.7	1	0	1	0	0	0	0.01419
8578	3227.73	1	0	1	0	0	0	0.0142266
8580	3227.76	1	0	1	0	0	0	0.0142618
8582	3227.8	1	0	1	0	0	0	0.0140149
8584	3227.83	1	0	1	0	0	0	0.0140393
8586	3227.86	1	0	1	0	0	0	0.013963
8588	3227.9	1	0	1	0	0	0	0.0135644
8590	3227.93	1	0	1	0	0	0	0.0134793
8592	3227.96	1	0	1	0	0	0	0.0134776
8594	3228	1	0	1	0	0	0	0.0133227
8596	3228.03	1	0	1	0	0	0	0.0132865
8598	3228.06	1	0	1	0	0	0	0.0134026
8600	3228.1	1	0	1	0	0	0	0.0132373
8602	3228.13	1	0	1	0	0	0	0.0131595
8604	3228.16	1	0	1	0	0	0	0.0133255
8606	3228.2	1	0	1	0	0	0	0.0134155
8608	3228.23	1	0	1	0	0	0	0.013479
8610	3228.26	1	0	1	0	0	0	0.0136059
8612	3228.3	1	0	1	0	0	0	0.0135452
8614	3228.33	1	0	1	0	0	0	0.0135693
8616	3228.36	1	0	1	0	0	0	0.013571
8618	3228.4	1	0	1	0	0	0	0.0134239
8620	3228.43	1	0	1	0	0	0	0.0134688
8622	3228.46	1	0	1	0	0	0	0.0135075
8624	3228.5	1	0	1	0	0	0	0.0135769
8626	3228.53	1	0	1	0	0	0	0.0136122
8628	3228.56	1	0	1	0	0	0	0.0135236
8630	3228.6	1	0	1	0	0	0	0.0136146
8632	3228.63	1	0	1	0	0	0	0.0135902
8634	3228.66	1	0	1	0	0	0	0.0135623
8636	3228.7	1	0	1	0	0	0	0.013685
8638	3228.73	1	0	1	0	0	0	0.0136732
8640	3228.76	1	0	1	0	0	0	0.0136341
8642	3228.8	1	0	1	0	0	0	0.0136934
8644	3228.83	1	0	1	0	0	0	0.0137834
8646	3228.86	1	0	1	0	0	0	0.0137597
8648	3228.9	1	0	1	0	0	0	0.0137593
8650	3228.93	1	0	1	0	0	0	0.0138479
8652	3228.96	1	0	1	0	0	0	0.013971
8654	3229	1	0	1	0	0	0	0.0138458
8656	3229.03	1	0	1	0	0	0	0.0137443
8658	3229.06	1	0	1	0	0	0	0.0137074
8660	3229.1	1	0	1	0	0	0	0.0136788
8662	3229.13	1	0	1	0	0	0	0.0135459
8664	3229.16	1	0	1	0	0	0	0.0136306
8666	3229.2	1	0	1	0	0	0	0.0137652
8668	3229.23	1	0	1	0	0	0	0.0137279
8670	3229.26	1	0	1	0	0	0	0.0137632
8672	3229.3	1	0	1	0	0	0	0.0137314
8674	3229.33	1	0	1	0	0	0	0.0137684
8676	3229.36	1	0	1	0	0	0	0.0137781
8678	3229.4	1	0	1	0	0	0	0.0137795
8680	3229.43	1	0	1	0	0	0	0.0138737
8682	3229.46	1	0	1	0	0	0	0.0138744
8684	3229.5	1	0	1	0	0	0	0.0139846
8686	3229.53	1	0	1	0	0	0	0.0140602
8688	3229.56	1	0	1	0	0	0	0.0140188
8690	3229.6	1	0	1	0	0	0	0.014024
8692	3229.63	1	0	1	0	0	0	0.0139033
8694	3229.66	1	0	1	0	0	0	0.0137963
8696	3229.7	1	0	1	0	0	0	0.0139361
8698	3229.73	1	0	1	0	0	0	0.0138772
8700	3229.76	1	0	1	0	0	0	0.0139159
8702	3229.8	1	0	1	0	0	0	0.0138681
8704	3229.83	1	0	1	0	0	0	0.0138577
8706	3229.86	1	0	1	0	0	0	0.0138699
8708	3229.9	1	0	1	0	0	0	0.0138343
8710	3229.93	1	0	1	0	0	0	0.0138838
8712	3229.96	1	0	1	0	0	0	0.0138733
8714	3230	1	0	1	0	0	0	0.0137865
8716	3230.03	1	0	1	0	0	0	0.0139528
8718	3230.06	1	0	1	0	0	0	0.0139187
8720	3230.1	1	0	1	0	0	0	0.0138674
8722	3230.13	1	0	1	0	0	0	0.0138549
8724	3230.16	1	0	1	0	0	0	0.0137973
8726	3230.2	1	0	1	0	0	0	0.0138242
8728	3230.23	1	0	1	0	0	0	0.013918
8730	3230.26	1	0	1	0	0	0	0.0137792
8732	3230.3	1	0	1	0	0	0	0.0136889
8734	3230.33	1	0	1	0	0	0	0.0136345
8736	3230.36	1	0	1	0	0	0	0.0136882
8738	3230.4	1	0	1	0	0	0	0.013669
8740	3230.43	1	0	1	0	0	0	0.0136446
8742	3230.46	1	0	1	0	0	0	0.0136645
8744	3230.5	1	0	1	0	0	0	0.0136861
8746	3230.53	1	0	1	0	0	0	0.013616
8748	3230.56	1	0	1	0	0	0	0.0136564
8750	3230.6	1	0	1	0	0	0	0.0136313
8752	3230.63	1	0	1	0	0	0	0.0136934
8754	3230.66	1	0	1	0	0	0	0.0136931
8756	3230.7	1	0	1	0	0	0	0.0135431
8758	3230.73	1	0	1	0	0	0	0.0135075
8760	3230.76	1	0	1	0	0	0	0.0136143
8762	3230.8	1	0	1	0	0	0	0.0134277
8764	3230.83	1	0	1	0	0	0	0.0134926
8766	3230.86	1	0	1	0	0	0	0.0136564
8768	3230.9	1	0	1	0	0	0	0.0135337
8770	3230.93	1	0	1	0	0	0	0.0134776
8772	3230.96	1	0	1	0	0	0	0.0136924
8774	3231	1	0	1	0	0	0	0.0135072
8776	3231.03	1	0	1	0	0	0	0.0136118
8778	3231.06	1	0	1	0	0	0	0.0137021
8780	3231.1	1	0	1	0	0	0	0.0139821
8782	3231.13	1	0	1	0	0	0	0.0139152
8784	3231.16	1	0	1	0	0	0	0.0138719
8786	3231.2	1	0	1	0	0	0	0.0139068
8788	3231.23	1	0	1	0	0	0	0.0136383
8790	3231.26	1	0	1	0	0	0	0.0134298
8792	3231.3	1	0	1	0	0	0	0.0135215
8794	3231.33	1	0	1	0	0	0	0.0132237
8796	3231.36	1	0	1	0	0	0	0.0131787
8798	3231.4	1	0	1	0	0	0	0.0133862
8800	3231.43	1	0	1	0	0	0	0.0134085
8802	3231.46	1	0	1	0	0	0	0.0133611
8804	3231.5	1	0	1	0	0	0	0.0133688
8806	3231.53	1	0	1	0	0	0	0.0134469
8808	3231.56	1	0	1	0	0	0	0.0134483
8810	3231.6	1	0	1	0	0	0	0.0135557
8812	3231.63	1	0	1	0	0	0	0.0136868
8814	3231.66	1	0	1	0	0	0	0.0135637
8816	3231.7	1	0	1	0	0	0	0.0137743
8818	3231.73	1	0	1	0	0	0	0.0137579
8820	3231.76	1	0	1	0	0	0	0.0135518
8822	3231.8	1	0	1	0	0	0	0.0139183
8824	3231.83	1	0	1	0	0	0	0.0137436
8826	3231.86	1	0	1	0	0	0	0.0135822
8828	3231.9	1	0	1	0	0	0	0.0138315
8830	3231.93	1	0	1	0	0	0	0.0136871
8832	3231.96	1	0	1	0	0	0	0.0138074
8834	3232	1	0	1	0	0	0	0.0138151
8836	3232.03	1	0	1	0	0	0	0.0135232
8838	3232.06	1	0	1	0	0	0	0.0136205
8840	3232.1	1	0	1	0	0	0	0.0136167
8842	3232.13	1	0	1	0	0	0	0.0135933
8844	3232.16	1	0	1	0	0	0	0.0135871
8846	3232.2	1	0	1	0	0	0	0.0137604
8848	3232.23	1	0	1	0	0	0	0.0139759
8850	3232.26	1	0	1	0	0	0	0.0139494
8852	3232.3	1	0	1	0	0	0	0.0139692
8854	3232.33	1	0	1	0	0	0	0.0135926
8856	3232.36	1	0	1	0	0	0	0.0136272
8858	3232.4	1	0	1	0	0	0	0.0136111
8860	3232.43	1	0	1	0	0	0	0.013336
8862	3232.46	1	0	1	0	0	0	0.0133963
8864	3232.5	1	0	1	0	0	0	0.0135769
8866	3232.53	1	0	1	0	0	0	0.0138737
8868	3232.56	1	0	1	0	0	0	0.0139685
8870	3232.6	1	0	1	0	0	0	0.0139595
8872	3232.63	1	0	1	0	0	0	0.0142635
8874	3232.66	1	0	1	0	0	0	0.0144184
8876	3232.7	1	0	1	0	0	0	0.0143926
8878	3232.73	1	0	1	0	0	0	0.0142904
8880	3232.76	1	0	1	0	0	0	0.0143661
8882	3232.8	1	0	1	0	0	0	0.0142513
8884	3232.83	1	0	1	0	0	0	0.0140589
8886	3232.86	1	0	1	0	0	0	0.0140868
8888	3232.9	1	0	1	0	0	0	0.0138451
8890	3232.93	1	0	1	0	0	0	0.0140038
8892	3232.96	1	0	1	0	0	0	0.0140407
8894	3233	1	0	1	0	0	0	0.0138587
8896	3233.03	1	0	1	0	0	0	0.0138971
8898	3233.06	1	0	1	0	0	0	0.0138601
8900	3233.1	1	0	1	0	0	0	0.0138922
8902	3233.13	1	0	1	0	0	0	0.0139316
8904	3233.16	1	0	1	0	0	0	0.0139978
8906	3233.2	1	0	1	0	0	0	0.0140697
8908	3233.23	1	0	1	0	0	0	0.0140536
8910	3233.26	1	0	1	0	0	0	0.014137
8912	3233.3	1	0	1	0	0	0	0.0140791
8914	3233.33	1	0	1	0	0	0	0.0141056
8916	3233.36	1	0	1	0	0	0	0.0140167
8918	3233.4	1	0	1	0	0	0	0.0139936
8920	3233.43	1	0	1	0	0	0	0.0139825
8922	3233.46	1	0	1	0	0	0	0.0139542
8924	3233.5	1	0	1	0	0	0	0.0139281
8926	3233.53	1	0	1	0	0	0	0.0139912
8928	3233.56	1	0	1	0	0	0	0.0139403
8930	3233.6	1	0	1	0	0	0	0.0139644
8932	3233.63	1	0	1	0	0	0	0.0139996
8934	3233.66	1	0	1	0	0	0	0.0139295
8936	3233.7	1	0	1	0	0	0	0.0140854
8938	3233.73	1	0	1	0	0	0	0.0140243
8940	3233.76	1	0	1	0	0	0	0.0139644
8942	3233.8	1	0	1	0	0	0	0.0138733
8944	3233.83	1	0	1	0	0	0	0.0139992
8946	3233.86	1	0	1	0	0	0	0.0140815
8948	3233.9	1	0	1	0	0	0	0.0139909
8950	3233.93	1	0	1	0	0	0	0.0139012
8952	3233.96	1	0	1	0	0	0	0.0137523
8954	3234	1	0	1	0	0	0	0.0137279
8956	3234.03	1	0	1	0	0	0	0.0139877
8958	3234.06	1	0	1	0	0	0	0.0141931
8960	3234.1	1	0	1	0	0	0	0.0141729
8962	3234.13	1	0	1	0	0	0	0.0141133
8964	3234.16	1	0	1	0	0	0	0.0141174
8966	3234.2	1	0	1	0	0	0	0.0140547
8968	3234.23	1	0	1	0	0	0	0.0138681
8970	3234.26	1	0	1	0	0	0	0.0139075
8972	3234.3	1	0	1	0	0	0	0.0139016
8974	3234.33	1	0	1	0	0	0	0.0139616
8976	3234.36	1	0	1	0	0	0	0.0140623
8978	3234.4	1	0	1	0	0	0	0.01401
8980	3234.43	1	0	1	0	0	0	0.0139912
8982	3234.46	1	0	1	0	0	0	0.0140494
8984	3234.5	1	0	1	0	0	0	0.0140184
8986	3234.53	1	0	1	0	0	0	0.013948
8988	3234.56	1	0	1	0	0	0	0.013857
8990	3234.6	1	0	1	0	0	0	0.0138343
8992	3234.63	1	0	1	0	0	0	0.013903
8994	3234.66	1	0	1	0	0	0	0.0138796
8996	3234.7	1	0	1	0	0	0	0.0139431
8998	3234.73	1	0	1	0	0	0	0.0138646
9000	3234.76	1	0	1	0	0	0	0.0135574
9002	3234.8	1	0	1	0	0	0	0.0137761
9004	3234.83	1	0	1	0	0	0	0.0138604
9006	3234.86	1	0	1	0	0	0	0.0140341
9008	3234.9	1	0	1	0	0	0	0.0140065
9010	3234.93	1	0	1	0	0	0	0.0140114
9012	3234.96	1	0	1	0	0	0	0.0139804
9014	3235	1	0	1	0	0	0	0.0139351
9016	3235.03	1	0	1	0	0	0	0.0136408
9018	3235.06	1	0	1	0	0	0	0.0133834
9020	3235.1	1	0	1	0	0	0	0.0130867
9022	3235.13	1	0	1	0	0	0	0.0129405
9024	3235.16	1	0	1	0	0	0	0.0129371
9026	3235.2	1	0	1	0	0	0	0.0129078
9028	3235.23	1	0	1	0	0	0	0.0129004
9030	3235.26	1	0	1	0	0	0	0.0130731
9032	3235.3	1	0	1	0	0	0	0.0131975
9034	3235.33	1	0	1	0	0	0	0.0133569
9036	3235.36	1	0	1	0	0	0	0.0132907
9038	3235.4	1	0	1	0	0	0	0.0132875
9040	3235.43	1	0	1	0	0	0	0.0132973
9042	3235.46	1	0	1	0	0	0	0.0133719
9044	3235.5	1	0	1	0	0	0	0.0133869
9046	3235.53	1	0	1	0	0	0	0.0136292
9048	3235.56	1	0	1	0	0	0	0.013827
9050	3235.6	1	0	1	0	0	0	0.0139515
9052	3235.63	1	0	1	0	0	0	0.0137412
9054	3235.66	1	0	1	0	0	0	0.013647
9056	3235.7	1	0	1	0	0	0	0.0135766
9058	3235.73	1	0	1	0	0	0	0.0136917
9060	3235.76	1	0	1	0	0	0	0.0136868
9062	3235.8	1	0	1	0	0	0	0.0136125
9064	3235.83	1	0	1	0	0	0	0.0135543
9066	3235.86	1	0	1	0	0	0	0.0135337
9068	3235.9	1	0	1	0	0	0	0.0135818
9070	3235.93	1	0	1	0	0	0	0.0135201
9072	3235.96	1	0	1	0	0	0	0.0135128
9074	3236	1	0	1	0	0	0	0.013518
9076	3236.03	1	0	1	0	0	0	0.0134926
9078	3236.06	1	0	1	0	0	0	0.0133374
9080	3236.1	1	0	1	0	0	0	0.0134036
9082	3236.13	1	0	1	0	0	0	0.0135316
9084	3236.16	1	0	1	0	0	0	0.0135909
9086	3236.2	1	0	1	0	0	0	0.0135557
9088	3236.23	1	0	1	0	0	0	0.0135201
9090	3236.26	1	0	1	0	0	0	0.0135041
9092	3236.3	1	0	1	0	0	0	0.0133994
9094	3236.33	1	0	1	0	0	0	0.0134702
9096	3236.36	1	0	1	0	0	0	0.0135368
9098	3236.4	1	0	1	0	0	0	0.0134183
9100	3236.43	1	0	1	0	0	0	0.0135152
9102	3236.46	1	0	1	0	0	0	0.0135895
9104	3236.5	1	0	1	0	0	0	0.0135386
9106	3236.53	1	0	1	0	0	0	0.013594
9108	3236.56	1	0	1	0	0	0	0.0135776
9110	3236.6	1	0	1	0	0	0	0.013434
9112	3236.63	1	0	1	0	0	0	0.0134096
9114	3236.66	1	0	1	0	0	0	0.0136791
9116	3236.7	1	0	1	0	0	0	0.0139528
9118	3236.73	1	0	1	0	0	0	0.0142677
9120	3236.76	1	0	1	0	0	0	0.0142186
9122	3236.8	1	0	1	0	0	0	0.0140721
9124	3236.83	1	0	1	0	0	0	0.0140494
9126	3236.86	1	0	1	0	0	0	0.0141244
9128	3236.9	1	0	1	0	0	0	0.0137687
9130	3236.93	1	0	1	0	0	0	0.0137928
9132	3236.96	1	0	1	0	0	0	0.0138615
9134	3237	1	0	1	0	0	0	0.0137984
9136	3237.03	1	0	1	0	0	0	0.0141056
9138	3237.06	1	0	1	0	0	0	0.0143096
9140	3237.1	1	0	1	0	0	0	0.0143682
9142	3237.13	1	0	1	0	0	0	0.0144138
9144	3237.16	1	0	1	0	0	0	0.0143444
9146	3237.2	1	0	1	0	0	0	0.0142531
9148	3237.23	1	0	1	0	0	0	0.0142147
9150	3237.26	1	0	1	0	0	0	0.0141875
9152	3237.3	1	0	1	0	0	0	0.0141677
9154	3237.33	1	0	1	0	0	0	0.014131
9156	3237.36	1	0	1	0	0	0	0.0141872
9158	3237.4	1	0	1	0	0	0	0.0141729
9160	3237.43	1	0	1	0	0	0	0.0141767
9162	3237.46	1	0	1	0	0	0	0.014167
9164	3237.5	1	0	1	0	0	0	0.0140899
9166	3237.53	1	0	1	0	0	0	0.0142231
9168	3237.56	1	0	1	0	0	0	0.0143863
9170	3237.6	1	0	1	0	0	0	0.0142506
9172	3237.63	1	0	1	0	0	0	0.0144288
9174	3237.66	1	0	1	0	0	0	0.0143476
9176	3237.7	1	0	1	0	0	0	0.0142126
9178	3237.73	1	0	1	0	0	0	0.0140264
9180	3237.76	1	0	1	0	0	0	0.0139504
9182	3237.8	1	0	1	0	0	0	0.0142998
9184	3237.83	1	0	1	0	0	0	0.0144013
9186	3237.86	1	0	1	0	0	0	0.0143295
9188	3237.9	1	0	1	0	0	0	0.0142852
9190	3237.93	1	0	1	0	0	0	0.0145603
9192	3237.96	1	0	1	0	0	0	0.0144644
9194	3238	1	0	1	0	0	0	0.0143465
9196	3238.03	1	0	1	0	0	0	0.014425
9198	3238.06	1	0	1	0	0	0	0.0143005
9200	3238.1	1	0	1	0	0	0	0.0144843
9202	3238.13	1	0	1	0	0	0	0.014879
9204	3238.16	1	0	1	0	0	0	0.0148731
9206	3238.2	1	0	1	0	0	0	0.0145683
9208	3238.23	1	0	1	0	0	0	0.0145582
9210	3238.26	1	0	1	0	0	0	0.0141042
9212	3238.3	1	0	1	0	0	0	0.0140651
9214	3238.33	1	0	1	0	0	0	0.0142573
9216	3238.36	1	0	1	0	0	0	0.0142248
9218	3238.4	1	0	1	0	0	0	0.0143647
9220	3238.43	1	0	1	0	0	0	0.0142472
9222	3238.46	1	0	1	0	0	0	0.0144138
9224	3238.5	1	0	1	0	0	0	0.0145512
9226	3238.53	1	0	1	0	0	0	0.0144784
9228	3238.56	1	0	1	0	0	0	0.0145722
9230	3238.6	1	0	1	0	0	0	0.0147078
9232	3238.63	1	0	1	0	0	0	0.0147054
9234	3238.66	1	0	1	0	0	0	0.0146304
9236	3238.7	1	0	1	0	0	0	0.014547
9238	3238.73	1	0	1	0	0	0	0.0144138
9240	3238.76	1	0	1	0	0	0	0.0140111
9242	3238.8	1	0	1	0	0	0	0.014108
9244	3238.83	1	0	1	0	0	0	0.014403
9246	3238.86	1	0	1	0	0	0	0.0143413
9248	3238.9	1	0	1	0	0	0	0.0141534
9250	3238.93	1	0	1	0	0	0	0.0144044
9252	3238.96	1	0	1	0	0	0	0.0144958
9254	3239	1	0	1	0	0	0	0.0144648
9256	3239.03	1	0	1	0	0	0	0.0144072
9258	3239.06	1	0	1	0	0	0	0.0143354
9260	3239.1	1	0	1	0	0	0	0.0143828
9262	3239.13	1	0	1	0	0	0	0.0145638
9264	3239.16	1	0	1	0	0	0	0.0146524
9266	3239.2	1	0	1	0	0	0	0.0146544
9268	3239.23	1	0	1	0	0	0	0.0144027
9270	3239.26	1	0	1	0	0	0	0.014479
9272	3239.3	1	0	1	0	0	0	0.0148159
9274	3239.33	1	0	1	0	0	0	0.0148825
9276	3239.36	1	0	1	0	0	0	0.014577
9278	3239.4	1	0	1	0	0	0	0.0146897
9280	3239.43	1	0	1	0	0	0	0.0143636
9282	3239.46	1	0	1	0	0	0	0.0143364
9284	3239.5	1	0	1	0	0	0	0.0144602
9286	3239.53	1	0	1	0	0	0	0.0146548
9288	3239.56	1	0	1	0	0	0	0.0144899
9290	3239.6	1	0	1	0	0	0	0.0143465
9292	3239.63	1	0	1	0	0	0	0.0144721
9294	3239.66	1	0	1	0	0	0	0.0145474
9296	3239.7	1	0	1	0	0	0	0.0144749
9298	3239.73	1	0	1	0	0	0	0.014471
9300	3239.76	1	0	1	0	0	0	0.0144916
9302	3239.8	1	0	1	0	0	0	0.0144435
9304	3239.83	1	0	1	0	0	0	0.0146402
9306	3239.86	1	0	1	0	0	0	0.0144069
9308	3239.9	1	0	1	0	0	0	0.0143807
9310	3239.93	1	0	1	0	0	0	0.0144679
9312	3239.96	1	0	1	0	0	0	0.0144438
9314	3240	1	0	1	0	0	0	0.0142562
9316	3240.03	1	0	1	0	0	0	0.01444
9318	3240.06	1	0	1	0	0	0	0.0145767
9320	3240.1	1	0	1	0	0	0	0.0147434
9322	3240.13	1	0	1	0	0	0	0.0146489
9324	3240.16	1	0	1	0	0	0	0.0145432
9326	3240.2	1	0	1	0	0	0	0.0145115
9328	3240.23	1	0	1	0	0	0	0.0147287
9330	3240.26	1	0	1	0	0	0	0.0148926
9332	3240.3	1	0	1	0	0	0	0.0146956
9334	3240.33	1	0	1	0	0	0	0.0145411
9336	3240.36	1	0	1	0	0	0	0.0143043
9338	3240.4	1	0	1	0	0	0	0.0142433
9340	3240.43	1	0	1	0	0	0	0.0143117
9342	3240.46	1	0	1	0	0	0	0.0146297
9344	3240.5	1	0	1	0	0	0	0.0144351
9346	3240.53	1	0	1	0	0	0	0.0142318
9348	3240.56	1	0	1	0	0	0	0.0143891
9350	3240.6	1	0	1	0	0	0	0.0144292
9352	3240.63	1	0	1	0	0	0	0.0142939
9354	3240.66	1	0	1	0	0	0	0.0143587
9356	3240.7	1	0	1	0	0	0	0.0142262
9358	3240.73	1	0	1	0	0	0	0.0143099
9360	3240.76	1	0	1	0	0	0	0.0142622
9362	3240.8	1	0	1	0	0	0	0.0140662
9364	3240.83	1	0	1	0	0	0	0.0139717
9366	3240.86	1	0	1	0	0	0	0.0140222
9368	3240.9	1	0	1	0	0	0	0.0144578
9370	3240.93	1	0	1	0	0	0	0.0143549
9372	3240.96	1	0	1	0	0	0	0.0142608
9374	3241	1	0	1	0	0	0	0.0140446
9376	3241.03	1	0	1	0	0	0	0.0139127
9378	3241.06	1	0	1	0	0	0	0.0139881
9380	3241.1	1	0	1	0	0	0	0.0140264
9382	3241.13	1	0	1	0	0	0	0.0141715
9384	3241.16	1	0	1	0	0	0	0.0142105
9386	3241.2	1	0	1	0	0	0	0.0143818
9388	3241.23	1	0	1	0	0	0	0.0142608
9390	3241.26	1	0	1	0	0	0	0.0143455
9392	3241.3	1	0	1	0	0	0	0.0145467
9394	3241.33	1	0	1	0	0	0	0.0141234
9396	3241.36	1	0	1	0	0	0	0.0140707
9398	3241.4	1	0	1	0	0	0	0.0143675
9400	3241.43	1	0	1	0	0	0	0.0142768
9402	3241.46	1	0	1	0	0	0	0.0141133
9404	3241.5	1	0	1	0	0	0	0.0141561
9406	3241.53	1	0	1	0	0	0	0.0139588
9408	3241.56	1	0	1	0	0	0	0.0137077
9410	3241.6	1	0	1	0	0	0	0.0138099
9412	3241.63	1	0	1	0	0	0	0.0138643
9414	3241.66	1	0	1	0	0	0	0.0139382
9416	3241.7	1	0	1	0	0	0	0.0141202
9418	3241.73	1	0	1	0	0	0	0.0141035
9420	3241.76	1	0	1	0	0	0	0.0139469
9422	3241.8	1	0	1	0	0	0	0.0140606
9424	3241.83	1	0	1	0	0	0	0.0139263
9426	3241.86	1	0	1	0	0	0	0.0137917
9428	3241.9	1	0	1	0	0	0	0.0139291
9430	3241.93	1	0	1	0	0	0	0.0140477
9432	3241.96	1	0	1	0	0	0	0.0142841
9434	3242	1	0	1	0	0	0	0.0141917
9436	3242.03	1	0	1	0	0	0	0.014146
9438	3242.06	1	0	1	0	0	0	0.0143315
9440	3242.1	1	0	1	0	0	0	0.014613
9442	3242.13	1	0	1	0	0	0	0.014879
9444	3242.16	1	0	1	0	0	0	0.0145812
9446	3242.2	1	0	1	0	0	0	0.0149735
9448	3242.23	1	0	1	0	0	0	0.0148333
9450	3242.26	1	0	1	0	0	0	0.0146157
9452	3242.3	1	0	1	0	0	0	0.0151161
9454	3242.33	1	0	1	0	0	0	0.0148741
9456	3242.36	1	0	1	0	0	0	0.0147078
9458	3242.4	1	0	1	0	0	0	0.0150049
9460	3242.43	1	0	1	0	0	0	0.0145997
9462	3242.46	1	0	1	0	0	0	0.0145826
9464	3242.5	1	0	1	0	0	0	0.0149041
9466	3242.53	1	0	1	0	0	0	0.0148047
9468	3242.56	1	0	1	0	0	0	0.0146039
9470	3242.6	1	0	1	0	0	0	0.0144979
9472	3242.63	1	0	1	0	0	0	0.0144926
9474	3242.66	1	0	1	0	0	0	0.0144027
9476	3242.7	1	0	1	0	0	0	0.0142559
9478	3242.73	1	0	1	0	0	0	0.0143043
9480	3242.76	1	0	1	0	0	0	0.0143713
9482	3242.8	1	0	1	0	0	0	0.0145519
9484	3242.83	1	0	1	0	0	0	0.0142751
9486	3242.86	1	0	1	0	0	0	0.0142768
9488	3242.9	1	0	1	0	0	0	0.0143772
9490	3242.93	1	0	1	0	0	0	0.0146063
9492	3242.96	1	0	1	0	0	0	0.0144641
9494	3243	1	0	1	0	0	0	0.0144449
9496	3243.03	1	0	1	0	0	0	0.0144055
9498	3243.06	1	0	1	0	0	0	0.014349
9500	3243.1	1	0	1	0	0	0	0.0145582
9502	3243.13	1	0	1	0	0	0	0.0148351
9504	3243.16	1	0	1	0	0	0	0.0147238
9506	3243.2	1	0	1	0	0	0	0.014719
9508	3243.23	1	0	1	0	0	0	0.0145429
9510	3243.26	1	0	1	0	0	0	0.014455
9512	3243.3	1	0	1	0	0	0	0.0144246
9514	3243.33	1	0	1	0	0	0	0.0145512
9516	3243.36	1	0	1	0	0	0	0.0145634
9518	3243.4	1	0	1	0	0	0	0.0145861
9520	3243.43	1	0	1	0	0	0	0.0146792
9522	3243.46	1	0	1	0	0	0	0.014713
9524	3243.5	1	0	1	0	0	0	0.0146046
9526	3243.53	1	0	1	0	0	0	0.0146816
9528	3243.56	1	0	1	0	0	0	0.0144808
9530	3243.6	1	0	1	0	0	0	0.0145069
9532	3243.63	1	0	1	0	0	0	0.0146262
9534	3243.66	1	0	1	0	0	0	0.0148086
9536	3243.7	1	0	1	0	0	0	0.0145875
9538	3243.73	1	0	1	0	0	0	0.0146663
9540	3243.76	1	0	1	0	0	0	0.0147476
9542	3243.8	1	0	1	0	0	0	0.0147364
9544	3243.83	1	0	1	0	0	0	0.014802
9546	3243.86	1	0	1	0	0	0	0.0148389
9548	3243.9	1	0	1	0	0	0	0.0145753
9550	3243.93	1	0	1	0	0	0	0.0145903
9552	3243.96	1	0	1	0	0	0	0.014545
9554	3244	1	0	1	0	0	0	0.0151133
9556	3244.03	1	0	1	0	0	0	0.0146785
9558	3244.06	1	0	1	0	0	0	0.0144665
9560	3244.1	1	0	1	0	0	0	0.0143647
9562	3244.13	1	0	1	0	0	0	0.0144226
9564	3244.16	1	0	1	0	0	0	0.0146886
9566	3244.2	1	0	1	0	0	0	0.01481
9568	3244.23	1	0	1	0	0	0	0.0145143
9570	3244.26	1	0	1	0	0	0	0.0145861
9572	3244.3	1	0	1	0	0	0	0.0147291
9574	3244.33	1	0	1	0	0	0	0.0147639
9576	3244.36	1	0	1	0	0	0	0.0149069
9578	3244.4	1	0	1	0	0	0	0.0147734
9580	3244.43	1	0	1	0	0	0	0.0146436
9582	3244.46	1	0	1	0	0	0	0.0146436
9584	3244.5	1	0	1	0	0	0	0.0145746
9586	3244.53	1	0	1	0	0	0	0.0147179
9588	3244.56	1	0	1	0	0	0	0.0146489
9590	3244.6	1	0	1	0	0	0	0.0143497
9592	3244.63	1	0	1	0	0	0	0.0144194
9594	3244.66	1	0	1	0	0	0	0.0146544
9596	3244.7	1	0	1	0	0	0	0.0145519
9598	3244.73	1	0	1	0	0	0	0.0146904
9600	3244.76	1	0	1	0	0	0	0.0145875
9602	3244.8	1	0	1	0	0	0	0.0144759
9604	3244.83	1	0	1	0	0	0	0.0142377
9606	3244.86	1	0	1	0	0	0	0.0141579
9608	3244.9	1	0	1	0	0	0	0.0143207
9610	3244.93	1	0	1	0	0	0	0.0141924
9612	3244.96	1	0	1	0	0	0	0.0138995
9614	3245	1	0	1	0	0	0	0.0142876
9616	3245.03	1	0	1	0	0	0	0.0144592
9618	3245.06	1	0	1	0	0	0	0.0145572
9620	3245.1	1	0	1	0	0	0	0.0147922
9622	3245.13	1	0	1	0	0	0	0.0144344
9624	3245.16	1	0	1	0	0	0	0.0143912
9626	3245.2	1	0	1	0	0	0	0.0145997
9628	3245.23	1	0	1	0	0	0	0.0144986
9630	3245.26	1	0	1	0	0	0	0.0145484
9632	3245.3	1	0	1	0	0	0	0.0148079
9634	3245.33	1	0	1	0	0	0	0.0147545
9636	3245.36	1	0	1	0	0	0	0.0146259
9638	3245.4	1	0	1	0	0	0	0.0144797
9640	3245.43	1	0	1	0	0	0	0.0147333
9642	3245.46	1	0	1	0	0	0	0.0147214
9644	3245.5	1	0	1	0	0	0	0.0144595
9646	3245.53	1	0	1	0	0	0	0.0145129
9648	3245.56	1	0	1	0	0	0	0.0143954
9650	3245.6	1	0	1	0	0	0	0.0148047
9652	3245.63	1	0	1	0	0	0	0.0144794
9654	3245.66	1	0	1	0	0	0	0.0144403
9656	3245.7	1	0	1	0	0	0	0.0144696
9658	3245.73	1	0	1	0	0	0	0.0143706
9660	3245.76	1	0	1	0	0	0	0.0144121
9662	3245.8	1	0	1	0	0	0	0.0143594
9664	3245.83	1	0	1	0	0	0	0.0143567
9666	3245.86	1	0	1	0	0	0	0.0144407
9668	3245.9	1	0	1	0	0	0	0.0144641
9670	3245.93	1	0	1	0	0	0	0.014887
9672	3245.96	1	0	1	0	0	0	0.0147259
9674	3246	1	0	1	0	0	0	0.0145565
9676	3246.03	1	0	1	0	0	0	0.0143615
9678	3246.06	1	0	1	0	0	0	0.01432
9680	3246.1	1	0	1	0	0	0	0.014107
9682	3246.13	1	0	1	0	0	0	0.0137621
9684	3246.16	1	0	1	0	0	0	0.0139968
9686	3246.2	1	0	1	0	0	0	0.0140167
9688	3246.23	1	0	1	0	0	0	0.0139591
9690	3246.26	1	0	1	0	0	0	0.0143703
9692	3246.3	1	0	1	0	0	0	0.014757
9694	3246.33	1	0	1	0	0	0	0.014592
9696	3246.36	1	0	1	0	0	0	0.014553
9698	3246.4	1	0	1	0	0	0	0.0145582
9700	3246.43	1	0	1	0	0	0	0.0145261
9702	3246.46	1	0	1	0	0	0	0.0145338
9704	3246.5	1	0	1	0	0	0	0.0146722
9706	3246.53	1	0	1	0	0	0	0.0145272
9708	3246.56	1	0	1	0	0	0	0.0144414
9710	3246.6	1	0	1	0	0	0	0.0143315
9712	3246.63	1	0	1	0	0	0	0.0144184
9714	3246.66	1	0	1	0	0	0	0.0144445
9716	3246.7	1	0	1	0	0	0	0.0143954
9718	3246.73	1	0	1	0	0	0	0.0142949
9720	3246.76	1	0	1	0	0	0	0.0144641
9722	3246.8	1	0	1	0	0	0	0.014645
9724	3246.83	1	0	1	0	0	0	0.0146049
9726	3246.86	1	0	1	0	0	0	0.0145648
9728	3246.9	1	0	1	0	0	0	0.014539
9730	3246.93	1	0	1	0	0	0	0.0144016
9732	3246.96	1	0	1	0	0	0	0.0147064
9734	3247	1	0	1	0	0	0	0.0147706
9736	3247.03	1	0	1	0	0	0	0.0145272
9738	3247.06	1	0	1	0	0	0	0.0144637
9740	3247.1	1	0	1	0	0	0	0.0144864
9742	3247.13	1	0	1	0	0	0	0.0147092
9744	3247.16	1	0	1	0	0	0	0.0148459
9746	3247.2	1	0	1	0	0	0	0.0145418
9748	3247.23	1	0	1	0	0	0	0.0144044
9750	3247.26	1	0	1	0	0	0	0.0143936
9752	3247.3	1	0	1	0	0	0	0.0146614
9754	3247.33	1	0	1	0	0	0	0.0148682
9756	3247.36	1	0	1	0	0	0	0.0146032
9758	3247.4	1	0	1	0	0	0	0.0144766
9760	3247.43	1	0	1	0	0	0	0.0143643
9762	3247.46	1	0	1	0	0	0	0.0143661
9764	3247.5	1	0	1	0	0	0	0.0145188
9766	3247.53	1	0	1	0	0	0	0.0143092
9768	3247.56	1	0	1	0	0	0	0.0142848
9770	3247.6	1	0	1	0	0	0	0.0142161
9772	3247.63	1	0	1	0	0	0	0.0142552
9774	3247.66	1	0	1	0	0	0	0.0144212
9776	3247.7	1	0	1	0	0	0	0.0144222
9778	3247.73	1	0	1	0	0	0	0.0143274
9780	3247.76	1	0	1	0	0	0	0.0142259
9782	3247.8	1	0	1	0	0	0	0.014326
9784	3247.83	1	0	1	0	0	0	0.0143845
9786	3247.86	1	0	1	0	0	0	0.0143675
9788	3247.9	1	0	1	0	0	0	0.0142168
9790	3247.93	1	0	1	0	0	0	0.014145
9792	3247.96	1	0	1	0	0	0	0.0140449
9794	3248	1	0	1	0	0	0	0.0141248
9796	3248.03	1	0	1	0	0	0	0.014486
9798	3248.06	1	0	1	0	0	0	0.0144009
9800	3248.1	1	0	1	0	0	0	0.0142758
9802	3248.13	1	0	1	0	0	0	0.0142193
9804	3248.16	1	0	1	0	0	0	0.0142189
9806	3248.2	1	0	1	0	0	0	0.014266
9808	3248.23	1	0	1	0	0	0	0.0144055
9810	3248.26	1	0	1	0	0	0	0.014131
9812	3248.3	1	0	1	0	0	0	0.0141366
9814	3248.33	1	0	1	0	0	0	0.0141987
9816	3248.36	1	0	1	0	0	0	0.0141715
9818	3248.4	1	0	1	0	0	0	0.0143068
9820	3248.43	1	0	1	0	0	0	0.0141718
9822	3248.46	1	0	1	0	0	0	0.0140139
9824	3248.5	1	0	1	0	0	0	0.0141572
9826	3248.53	1	0	1	0	0	0	0.0141094
9828	3248.56	1	0	1	0	0	0	0.014213
9830	3248.6	1	0	1	0	0	0	0.014341
9832	3248.63	1	0	1	0	0	0	0.0141844
9834	3248.66	1	0	1	0	0	0	0.0140442
9836	3248.7	1	0	1	0	0	0	0.014206
9838	3248.73	1	0	1	0	0	0	0.0140313
9840	3248.76	1	0	1	0	0	0	0.0141907
9842	3248.8	1	0	1	0	0	0	0.0142259
9844	3248.83	1	0	1	0	0	0	0.0139877
9846	3248.86	1	0	1	0	0	0	0.014078
9848	3248.9	1	0	1	0	0	0	0.0140993
9850	3248.93	1	0	1	0	0	0	0.013978
9852	3248.96	1	0	1	0	0	0	0.0141722
9854	3249	1	0	1	0	0	0	0.0140979
9856	3249.03	1	0	1	0	0	0	0.0139623
9858	3249.06	1	0	1	0	0	0	0.0140222
9860	3249.1	1	0	1	0	0	0	0.0142308
9862	3249.13	1	0	1	0	0	0	0.0142022
9864	3249.16	1	0	1	0	0	0	0.0144644
9866	3249.2	1	0	1	0	0	0	0.0144888
9868	3249.23	1	0	1	0	0	0	0.0141436
9870	3249.26	1	0	1	0	0	0	0.014258
9872	3249.3	1	0	1	0	0	0	0.0140857
9874	3249.33	1	0	1	0	0	0	0.0141352
9876	3249.36	1	0	1	0	0	0	0.0142287
9878	3249.4	1	0	1	0	0	0	0.0141952
9880	3249.43	1	0	1	0	0	0	0.0140735
9882	3249.46	1	0	1	0	0	0	0.0141561
9884	3249.5	1	0	1	0	0	0	0.0142064
9886	3249.53	1	0	1	0	0	0	0.0141387
9888	3249.56	1	0	1	0	0	0	0.0143012
9890	3249.6	1	0	1	0	0	0	0.0142423
9892	3249.63	1	0	1	0	0	0	0.0141603
9894	3249.66	1	0	1	0	0	0	0.0140725
9896	3249.7	1	0	1	0	0	0	0.0140076
9898	3249.73	1	0	1	0	0	0	0.0140358
9900	3249.76	1	0	1	0	0	0	0.0137966
9902	3249.8	1	0	1	0	0	0	0.0137903
9904	3249.83	1	0	1	0	0	0	0.0135982
9906	3249.86	1	0	1	0	0	0	0.0135044
9908	3249.9	1	0	1	0	0	0	0.0135173
9910	3249.93	1	0	1	0	0	0	0.0134137
9912	3249.96	1	0	1	0	0	0	0.0134113
9914	3250	1	0	1	0	0	0	0.0136512
9916	3250.03	1	0	1	0	0	0	0.0134057
9918	3250.06	1	0	1	0	0	0	0.0132833
9920	3250.1	1	0	1	0	0	0	0.0134709
9922	3250.13	1	0	1	0	0	0	0.0131358
9924	3250.16	1	0	1	0	0	0	0.0130364
9926	3250.2	1	0	1	0	0	0	0.0132805
9928	3250.23	1	0	1	0	0	0	0.0134458
9930	3250.26	1	0	1	0	0	0	0.0134162
9932	3250.3	1	0	1	0	0	0	0.013532
9934	3250.33	1	0	1	0	0	0	0.0133004
9936	3250.36	1	0	1	0	0	0	0.0130947
9938	3250.4	1	0	1	0	0	0	0.0132844
9940	3250.43	1	0	1	0	0	0	0.0131337
9942	3250.46	1	0	1	0	0	0	0.0130002
9944	3250.5	1	0	1	0	0	0	0.0131414
9946	3250.53	1	0	1	0	0	0	0.0133147
9948	3250.56	1	0	1	0	0	0	0.0133224
9950	3250.6	1	0	1	0	0	0	0.0134329
9952	3250.63	1	0	1	0	0	0	0.0135738
9954	3250.66	1	0	1	0	0	0	0.0135393
9956	3250.7	1	0	1	0	0	0	0.0134075
9958	3250.73	1	0	1	0	0	0	0.013413
9960	3250.76	1	0	1	0	0	0	0.0134654
9962	3250.8	1	0	1	0	0	0	0.0133785
9964	3250.83	1	0	1	0	0	0	0.0132268
9966	3250.86	1	0	1	0	0	0	0.0133719
9968	3250.9	1	0	1	0	0	0	0.0132066
9970	3250.93	1	0	1	0	0	0	0.0130194
9972	3250.96	1	0	1	0	0	0	0.0132453
9974	3251	1	0	1	0	0	0	0.0131637
9976	3251.03	1	0	1	0	0	0	0.012982
9978	3251.06	1	0	1	0	0	0	0.0131805
9980	3251.1	1	0	1	0	0	0	0.0131871
9982	3251.13	1	0	1	0	0	0	0.0132816
9984	3251.16	1	0	1	0	0	0	0.0133471
9986	3251.2	1	0	1	0	0	0	0.0134685
9988	3251.23	1	0	1	0	0	0	0.013503
9990	3251.26	1	0	1	0	0	0	0.0136732
9992	3251.3	1	0	1	0	0	0	0.0138284
9994	3251.33	1	0	1	0	0	0	0.0137876
9996	3251.36	1	0	1	0	0	0	0.0138039
9998	3251.4	1	0	1	0	0	0	0.0140794
10000	3251.43	1	0	1	0	0	0	0.014206
10002	3251.46	1	0	1	0	0	0	0.0141084
10004	3251.5	1	0	1	0	0	0	0.0141502
10006	3251.53	1	0	1	0	0	0	0.0142088
10008	3251.56	1	0	1	0	0	0	0.0143849
10010	3251.6	1	0	1	0	0	0	0.0147828
10012	3251.63	1	0	1	0	0	0	0.0150025
10014	3251.66	1	0	1	0	0	0	0.0150715
10016	3251.7	1	0	1	0	0	0	0.0151793
10018	3251.73	1	0	1	0	0	0	0.0151475
10020	3251.76	1	0	1	0	0	0	0.0150544
10022	3251.8	1	0	1	0	0	0	0.0146147
10024	3251.83	1	0	1	0	0	0	0.0145708
10026	3251.86	1	0	1	0	0	0	0.0145055
10028	3251.9	1	0	1	0	0	0	0.0147116
10030	3251.93	1	0	1	0	0	0	0.0145812
10032	3251.96	1	0	1	0	0	0	0.014183
10034	3252	1	0	1	0	0	0	0.0139427
10036	3252.03	1	0	1	0	0	0	0.0140756
10038	3252.06	1	0	1	0	0	0	0.014326
10040	3252.1	1	0	1	0	0	0	0.0142758
10042	3252.13	1	0	1	0	0	0	0.0141753
10044	3252.16	1	0	1	0	0	0	0.01438
10046	3252.2	1	0	1	0	0	0	0.0143821
10048	3252.23	1	0	1	0	0	0	0.014267
10050	3252.26	1	0	1	0	0	0	0.0147095
10052	3252.3	1	0	1	0	0	0	0.0147573
10054	3252.33	1	0	1	0	0	0	0.0145376
10056	3252.36	1	0	1	0	0	0	0.0145272
10058	3252.4	1	0	1	0	0	0	0.0145457
10060	3252.43	1	0	1	0	0	0	0.0147493
10062	3252.46	1	0	1	0	0	0	0.014826
10064	3252.5	1	0	1	0	0	0	0.0147081
10066	3252.53	1	0	1	0	0	0	0.0144714
10068	3252.56	1	0	1	0	0	0	0.0144599
10070	3252.6	1	0	1	0	0	0	0.0143124
10072	3252.63	1	0	1	0	0	0	0.0144086
10074	3252.66	1	0	1	0	0	0	0.0146182
10076	3252.7	1	0	1	0	0	0	0.0144578
10078	3252.73	1	0	1	0	0	0	0.0142353
10080	3252.76	1	0	1	0	0	0	0.0143629
10082	3252.8	1	0	1	0	0	0	0.0144794
10084	3252.83	1	0	1	0	0	0	0.0145139
10086	3252.86	1	0	1	0	0	0	0.0144149
10088	3252.9	1	0	1	0	0	0	0.0146039
10090	3252.93	1	0	1	0	0	0	0.0149557
10092	3252.96	1	0	1	0	0	0	0.0149495
10094	3253	1	0	1	0	0	0	0.0150419
10096	3253.03	1	0	1	0	0	0	0.0150753
10098	3253.06	1	0	1	0	0	0	0.0151315
10100	3253.1	1	0	1	0	0	0	0.0148023
10102	3253.13	1	0	1	0	0	0	0.0146332
10104	3253.16	1	0	1	0	0	0	0.0145178
10106	3253.2	1	0	1	0	0	0	0.0144403
10108	3253.23	1	0	1	0	0	0	0.0142897
10110	3253.26	1	0	1	0	0	0	0.0143845
10112	3253.3	1	0	1	0	0	0	0.0145185
10114	3253.33	1	0	1	0	0	0	0.0141265
10116	3253.36	1	0	1	0	0	0	0.0141432
10118	3253.4	1	0	1	0	0	0	0.0144076
10120	3253.43	1	0	1	0	0	0	0.0142939
10122	3253.46	1	0	1	0	0	0	0.0142911
10124	3253.5	1	0	1	0	0	0	0.0142555
10126	3253.53	1	0	1	0	0	0	0.014281
10128	3253.56	1	0	1	0	0	0	0.0142527
10130	3253.6	1	0	1	0	0	0	0.0139909
10132	3253.63	1	0	1	0	0	0	0.0140568
10134	3253.66	1	0	1	0	0	0	0.0142887
10136	3253.7	1	0	1	0	0	0	0.0142817
10138	3253.73	1	0	1	0	0	0	0.0143267
10140	3253.76	1	0	1	0	0	0	0.014206
10142	3253.8	1	0	1	0	0	0	0.0141272
10144	3253.83	1	0	1	0	0	0	0.0142747
10146	3253.86	1	0	1	0	0	0	0.0144142
10148	3253.9	1	0	1	0	0	0	0.0143668
10150	3253.93	1	0	1	0	0	0	0.0142604
10152	3253.96	1	0	1	0	0	0	0.0146286
10154	3254	1	0	1	0	0	0	0.0146269
10156	3254.03	1	0	1	0	0	0	0.0144944
10158	3254.06	1	0	1	0	0	0	0.014433
10160	3254.1	1	0	1	0	0	0	0.0144159
10162	3254.13	1	0	1	0	0	0	0.0144518
10164	3254.16	1	0	1	0	0	0	0.0143734
10166	3254.2	1	0	1	0	0	0	0.0144358
10168	3254.23	1	0	1	0	0	0	0.0144763
10170	3254.26	1	0	1	0	0	0	0.0146555
10172	3254.3	1	0	1	0	0	0	0.0147235
10174	3254.33	1	0	1	0	0	0	0.0145844
10176	3254.36	1	0	1	0	0	0	0.0144281
10178	3254.4	1	0	1	0	0	0	0.0142151
10180	3254.43	1	0	1	0	0	0	0.014335
10182	3254.46	1	0	1	0	0	0	0.014584
10184	3254.5	1	0	1	0	0	0	0.0143458
10186	3254.53	1	0	1	0	0	0	0.0141879
10188	3254.56	1	0	1	0	0	0	0.0143957
10190	3254.6	1	0	1	0	0	0	0.0147284
10192	3254.63	1	0	1	0	0	0	0.0145819
10194	3254.66	1	0	1	0	0	0	0.0143856
10196	3254.7	1	0	1	0	0	0	0.0145289
10198	3254.73	1	0	1	0	0	0	0.014629
10200	3254.76	1	0	1	0	0	0	0.0147064
10202	3254.8	1	0	1	0	0	0	0.0147577
10204	3254.83	1	0	1	0	0	0	0.0146893
10206	3254.86	1	0	1	0	0	0	0.0146182
10208	3254.9	1	0	1	0	0	0	0.0145467
10210	3254.93	1	0	1	0	0	0	0.0145544
10212	3254.96	1	0	1	0	0	0	0.0149132
10214	3255	1	0	1	0	0	0	0.0146213
10216	3255.03	1	0	1	0	0	0	0.0144843
10218	3255.06	1	0	1	0	0	0	0.0143361
10220	3255.1	1	0	1	0	0	0	0.0142761
10222	3255.13	1	0	1	0	0	0	0.0143127
10224	3255.16	1	0	1	0	0	0	0.0143392
10226	3255.2	1	0	1	0	0	0	0.0143859
10228	3255.23	1	0	1	0	0	0	0.0145324
10230	3255.26	1	0	1	0	0	0	0.0143992
10232	3255.3	1	0	1	0	0	0	0.0145293
10234	3255.33	1	0	1	0	0	0	0.0147207
10236	3255.36	1	0	1	0	0	0	0.0144672
10238	3255.4	1	0	1	0	0	0	0.0142465
10240	3255.43	1	0	1	0	0	0	0.0142538
10242	3255.46	1	0	1	0	0	0	0.0142897
10244	3255.5	1	0	1	0	0	0	0.0142981
10246	3255.53	1	0	1	0	0	0	0.0143375
10248	3255.56	1	0	1	0	0	0	0.0143734
10250	3255.6	1	0	1	0	0	0	0.0140062
10252	3255.63	1	0	1	0	0	0	0.0139054
10254	3255.66	1	0	1	0	0	0	0.0139424
10256	3255.7	1	0	1	0	0	0	0.0136669
10258	3255.73	1	0	1	0	0	0	0.0136544
10260	3255.76	1	0	1	0	0	0	0.0139236
10262	3255.8	1	0	1	0	0	0	0.0139898
10264	3255.83	1	0	1	0	0	0	0.0140013
10266	3255.86	1	0	1	0	0	0	0.0139877
10268	3255.9	1	0	1	0	0	0	0.0139441
10270	3255.93	1	0	1	0	0	0	0.0140184
10272	3255.96	1	0	1	0	0	0	0.0142566
10274	3256	1	0	1	0	0	0	0.0143978
10276	3256.03	1	0	1	0	0	0	0.0144763
10278	3256.06	1	0	1	0	0	0	0.0144717
10280	3256.1	1	0	1	0	0	0	0.0145237
10282	3256.13	1	0	1	0	0	0	0.014494
10284	3256.16	1	0	1	0	0	0	0.0143856
10286	3256.2	1	0	1	0	0	0	0.0143978
10288	3256.23	1	0	1	0	0	0	0.0143138
10290	3256.26	1	0	1	0	0	0	0.0142022
10292	3256.3	1	0	1	0	0	0	0.0143462
10294	3256.33	1	0	1	0	0	0	0.0143748
10296	3256.36	1	0	1	0	0	0	0.0145094
10298	3256.4	1	0	1	0	0	0	0.014243
10300	3256.43	1	0	1	0	0	0	0.0141457
10302	3256.46	1	0	1	0	0	0	0.0141886
10304	3256.5	1	0	1	0	0	0	0.0141753
10306	3256.53	1	0	1	0	0	0	0.0143036
10308	3256.56	1	0	1	0	0	0	0.0142367
10310	3256.6	1	0	1	0	0	0	0.0142234
10312	3256.63	1	0	1	0	0	0	0.014258
10314	3256.66	1	0	1	0	0	0	0.0143584
10316	3256.7	1	0	1	0	0	0	0.0145066
10318	3256.73	1	0	1	0	0	0	0.0141663
10320	3256.76	1	0	1	0	0	0	0.0139399
10322	3256.8	1	0	1	0	0	0	0.0140871
10324	3256.83	1	0	1	0	0	0	0.0142234
10326	3256.86	1	0	1	0	0	0	0.0142981
10328	3256.9	1	0	1	0	0	0	0.0140498
10330	3256.93	1	0	1	0	0	0	0.0140498
10332	3256.96	1	0	1	0	0	0	0.0139623
10334	3257	1	0	1	0	0	0	0.0139598
10336	3257.03	1	0	1	0	0	0	0.0140059
10338	3257.06	1	0	1	0	0	0	0.0140219
10340	3257.1	1	0	1	0	0	0	0.0142492
10342	3257.13	1	0	1	0	0	0	0.0143654
10344	3257.16	1	0	1	0	0	0	0.0143619
10346	3257.2	1	0	1	0	0	0	0.0143312
10348	3257.23	1	0	1	0	0	0	0.0144895
10350	3257.26	1	0	1	0	0	0	0.0145687
10352	3257.3	1	0	1	0	0	0	0.0144853
10354	3257.33	1	0	1	0	0	0	0.0144937
10356	3257.36	1	0	1	0	0	0	0.0142391
10358	3257.4	1	0	1	0	0	0	0.0140732
10360	3257.43	1	0	1	0	0	0	0.0138095
10362	3257.46	1	0	1	0	0	0	0.0135979
10364	3257.5	1	0	1	0	0	0	0.0136728
10366	3257.53	1	0	1	0	0	0	0.0137816
10368	3257.56	1	0	1	0	0	0	0.0134926
10370	3257.6	1	0	1	0	0	0	0.0136453
10372	3257.63	1	0	1	0	0	0	0.0135794
10374	3257.66	1	0	1	0	0	0	0.0136087
10376	3257.7	1	0	1	0	0	0	0.0136652
10378	3257.73	1	0	1	0	0	0	0.013707
10380	3257.76	1	0	1	0	0	0	0.0136007
10382	3257.8	1	0	1	0	0	0	0.01354
10384	3257.83	1	0	1	0	0	0	0.0137398
10386	3257.86	1	0	1	0	0	0	0.0137213
10388	3257.9	1	0	1	0	0	0	0.013662
10390	3257.93	1	0	1	0	0	0	0.0135965
10392	3257.96	1	0	1	0	0	0	0.0135679
10394	3258	1	0	1	0	0	0	0.0134821
10396	3258.03	1	0	1	0	0	0	0.0134748
10398	3258.06	1	0	1	0	0	0	0.0135449
10400	3258.1	1	0	1	0	0	0	0.0136014
10402	3258.13	1	0	1	0	0	0	0.0135762
10404	3258.16	1	0	1	0	0	0	0.0135909
10406	3258.2	1	0	1	0	0	0	0.013631
10408	3258.23	1	0	1	0	0	0	0.0136115
10410	3258.26	1	0	1	0	0	0	0.0136073
10412	3258.3	1	0	1	0	0	0	0.0135759
10414	3258.33	1	0	1	0	0	0	0.0136052
10416	3258.36	1	0	1	0	0	0	0.013563
10418	3258.4	1	0	1	0	0	0	0.0134901
10420	3258.43	1	0	1	0	0	0	0.0135438
10422	3258.46	1	0	1	0	0	0	0.013579
10424	3258.5	1	0	1	0	0	0	0.0136432
10426	3258.53	1	0	1	0	0	0	0.0135463
10428	3258.56	1	0	1	0	0	0	0.0135811
10430	3258.6	1	0	1	0	0	0	0.0136355
10432	3258.63	1	0	1	0	0	0	0.0136125
10434	3258.66	1	0	1	0	0	0	0.0136345
10436	3258.7	1	0	1	0	0	0	0.0135979
10438	3258.73	1	0	1	0	0	0	0.0136289
10440	3258.76	1	0	1	0	0	0	0.0135846
10442	3258.8	1	0	1	0	0	0	0.0135166
10444	3258.83	1	0	1	0	0	0	0.0135825
10446	3258.86	1	0	1	0	0	0	0.0135954
10448	3258.9	1	0	1	0	0	0	0.0134395
10450	3258.93	1	0	1	0	0	0	0.013411
10452	3258.96	1	0	1	0	0	0	0.0136303
10454	3259	1	0	1	0	0	0	0.0136718
10456	3259.03	1	0	1	0	0	0	0.0138848
10458	3259.06	1	0	1	0	0	0	0.0139923
10460	3259.1	1	0	1	0	0	0	0.0140609
10462	3259.13	1	0	1	0	0	0	0.0139692
10464	3259.16	1	0	1	0	0	0	0.0141387
10466	3259.2	1	0	1	0	0	0	0.0142388
10468	3259.23	1	0	1	0	0	0	0.0141474
10470	3259.26	1	0	1	0	0	0	0.0141405
10472	3259.3	1	0	1	0	0	0	0.0137719
10474	3259.33	1	0	1	0	0	0	0.0136634
10476	3259.36	1	0	1	0	0	0	0.0135417
10478	3259.4	1	0	1	0	0	0	0.0133321
10480	3259.43	1	0	1	0	0	0	0.0134427
10482	3259.46	1	0	1	0	0	0	0.0132129
10484	3259.5	1	0	1	0	0	0	0.013208
10486	3259.53	1	0	1	0	0	0	0.0134905
10488	3259.56	1	0	1	0	0	0	0.0136275
10490	3259.6	1	0	1	0	0	0	0.0137328
10492	3259.63	1	0	1	0	0	0	0.0136491
10494	3259.66	1	0	1	0	0	0	0.013367
10496	3259.7	1	0	1	0	0	0	0.0132439
10498	3259.73	1	0	1	0	0	0	0.0132593
10500	3259.76	1	0	1	0	0	0	0.0130835
10502	3259.8	1	0	1	0	0	0	0.0131159
10504	3259.83	1	0	1	0	0	0	0.013139
10506	3259.86	1	0	1	0	0	0	0.0132356
10508	3259.9	1	0	1	0	0	0	0.0133032
10510	3259.93	1	0	1	0	0	0	0.0134364
10512	3259.96	1	0	1	0	0	0	0.013586
10514	3260	1	0	1	0	0	0	0.0136132
10516	3260.03	1	0	1	0	0	0	0.0137597
10518	3260.06	1	0	1	0	0	0	0.013934
10520	3260.1	1	0	1	0	0	0	0.0140083
10522	3260.13	1	0	1	0	0	0	0.0140655
10524	3260.16	1	0	1	0	0	0	0.0140756
10526	3260.2	1	0	1	0	0	0	0.0140292
10528	3260.23	1	0	1	0	0	0	0.0141185
10530	3260.26	1	0	1	0	0	0	0.0140142
10532	3260.3	1	0	1	0	0	0	0.0139616
10534	3260.33	1	0	1	0	0	0	0.0138901
10536	3260.36	1	0	1	0	0	0	0.0134988
10538	3260.4	1	0	1	0	0	0	0.0134162
10540	3260.43	1	0	1	0	0	0	0.0133538
10542	3260.46	1	0	1	0	0	0	0.0131819
10544	3260.5	1	0	1	0	0	0	0.0131916
10546	3260.53	1	0	1	0	0	0	0.0131791
10548	3260.56	1	0	1	0	0	0	0.0130584
10550	3260.6	1	0	1	0	0	0	0.0130295
10552	3260.63	1	0	1	0	0	0	0.0131205
10554	3260.66	1	0	1	0	0	0	0.013004
10556	3260.7	1	0	1	0	0	0	0.0131013
10558	3260.73	1	0	1	0	0	0	0.0134528
10560	3260.76	1	0	1	0	0	0	0.0133018
10562	3260.8	1	0	1	0	0	0	0.0132582
10564	3260.83	1	0	1	0	0	0	0.013479
10566	3260.86	1	0	1	0	0	0	0.0136826
10568	3260.9	1	0	1	0	0	0	0.0136707
10570	3260.93	1	0	1	0	0	0	0.013789
10572	3260.96	1	0	1	0	0	0	0.0138402
10574	3261	1	0	1	0	0	0	0.0136097
10576	3261.03	1	0	1	0	0	0	0.013488
10578	3261.06	1	0	1	0	0	0	0.0133621
10580	3261.1	1	0	1	0	0	0	0.0131341
10582	3261.13	1	0	1	0	0	0	0.013118
10584	3261.16	1	0	1	0	0	0	0.0131139
10586	3261.2	1	0	1	0	0	0	0.0130166
10588	3261.23	1	0	1	0	0	0	0.0130619
10590	3261.26	1	0	1	0	0	0	0.0130546
10592	3261.3	1	0	1	0	0	0	0.0129747
10594	3261.33	1	0	1	0	0	0	0.0129472
10596	3261.36	1	0	1	0	0	0	0.0132387
10598	3261.4	1	0	1	0	0	0	0.0131989
10600	3261.43	1	0	1	0	0	0	0.0131951
10602	3261.46	1	0	1	0	0	0	0.0133698
10604	3261.5	1	0	1	0	0	0	0.0134716
10606	3261.53	1	0	1	0	0	0	0.0133722
10608	3261.56	1	0	1	0	0	0	0.0132938
10610	3261.6	1	0	1	0	0	0	0.0134803
10612	3261.63	1	0	1	0	0	0	0.0133541
10614	3261.66	1	0	1	0	0	0	0.0133056
10616	3261.7	1	0	1	0	0	0	0.0134284
10618	3261.73	1	0	1	0	0	0	0.0133161
10620	3261.76	1	0	1	0	0	0	0.0132098
10622	3261.8	1	0	1	0	0	0	0.0132453
10624	3261.83	1	0	1	0	0	0	0.0133639
10626	3261.86	1	0	1	0	0	0	0.0135494
10628	3261.9	1	0	1	0	0	0	0.0136265
10630	3261.93	1	0	1	0	0	0	0.0139448
10632	3261.96	1	0	1	0	0	0	0.0139532
10634	3262	1	0	1	0	0	0	0.0139584
10636	3262.03	1	0	1	0	0	0	0.0139487
10638	3262.06	1	0	1	0	0	0	0.0139354
10640	3262.1	1	0	1	0	0	0	0.0139671
10642	3262.13	1	0	1	0	0	0	0.0140648
10644	3262.16	1	0	1	0	0	0	0.0140201
10646	3262.2	1	0	1	0	0	0	0.0136219
10648	3262.23	1	0	1	0	0	0	0.0136948
10650	3262.26	1	0	1	0	0	0	0.0135239
10652	3262.3	1	0	1	0	0	0	0.0132966
10654	3262.33	1	0	1	0	0	0	0.0132889
10656	3262.36	1	0	1	0	0	0	0.0133691
10658	3262.4	1	0	1	0	0	0	0.0132907
10660	3262.43	1	0	1	0	0	0	0.0133315
10662	3262.46	1	0	1	0	0	0	0.0134985
10664	3262.5	1	0	1	0	0	0	0.0138305
10666	3262.53	1	0	1	0	0	0	0.0138991
10668	3262.56	1	0	1	0	0	0	0.0140358
10670	3262.6	1	0	1	0	0	0	0.0140107
10672	3262.63	1	0	1	0	0	0	0.0140878
10674	3262.66	1	0	1	0	0	0	0.0141994
10676	3262.7	1	0	1	0	0	0	0.0141251
10678	3262.73	1	0	1	0	0	0	0.0141391
10680	3262.76	1	0	1	0	0	0	0.01432
10682	3262.8	1	0	1	0	0	0	0.0142785
10684	3262.83	1	0	1	0	0	0	0.0142524
10686	3262.86	1	0	1	0	0	0	0.0141568
10688	3262.9	1	0	1	0	0	0	0.0140805
10690	3262.93	1	0	1	0	0	0	0.0141617
10692	3262.96	1	0	1	0	0	0	0.0142297
10694	3263	1	0	1	0	0	0	0.0140446
10696	3263.03	1	0	1	0	0	0	0.0140491
10698	3263.06	1	0	1	0	0	0	0.0141418
10700	3263.1	1	0	1	0	0	0	0.0141464
10702	3263.13	1	0	1	0	0	0	0.0141021
10704	3263.16	1	0	1	0	0	0	0.0141621
10706	3263.2	1	0	1	0	0	0	0.014168
10708	3263.23	1	0	1	0	0	0	0.0136421
10710	3263.26	1	0	1	0	0	0	0.0136732
10712	3263.3	1	0	1	0	0	0	0.0136408
10714	3263.33	1	0	1	0	0	0	0.0135278
10716	3263.36	1	0	1	0	0	0	0.0134587
10718	3263.4	1	0	1	0	0	0	0.0135794
10720	3263.43	1	0	1	0	0	0	0.0136111
10722	3263.46	1	0	1	0	0	0	0.0135103
10724	3263.5	1	0	1	0	0	0	0.0134999
10726	3263.53	1	0	1	0	0	0	0.013496
10728	3263.56	1	0	1	0	0	0	0.0134817
10730	3263.6	1	0	1	0	0	0	0.013532
10732	3263.63	1	0	1	0	0	0	0.0134919
10734	3263.66	1	0	1	0	0	0	0.013511
10736	3263.7	1	0	1	0	0	0	0.013502
10738	3263.73	1	0	1	0	0	0	0.0134706
10740	3263.76	1	0	1	0	0	0	0.0134995
10742	3263.8	1	0	1	0	0	0	0.0135912
10744	3263.83	1	0	1	0	0	0	0.0139333
10746	3263.86	1	0	1	0	0	0	0.0139668
10748	3263.9	1	0	1	0	0	0	0.013979
10750	3263.93	1	0	1	0	0	0	0.013918
10752	3263.96	1	0	1	0	0	0	0.0135644
10754	3264	1	0	1	0	0	0	0.0135539
10756	3264.03	1	0	1	0	0	0	0.0134458
10758	3264.06	1	0	1	0	0	0	0.0132164
10760	3264.1	1	0	1	0	0	0	0.0132791
10762	3264.13	1	0	1	0	0	0	0.0131895
10764	3264.16	1	0	1	0	0	0	0.0131595
10766	3264.2	1	0	1	0	0	0	0.013366
10768	3264.23	1	0	1	0	0	0	0.0132757
10770	3264.26	1	0	1	0	0	0	0.0131944
10772	3264.3	1	0	1	0	0	0	0.0134246
10774	3264.33	1	0	1	0	0	0	0.013419
10776	3264.36	1	0	1	0	0	0	0.0135194
10778	3264.4	1	0	1	0	0	0	0.0138768
10780	3264.43	1	0	1	0	0	0	0.0138322
10782	3264.46	1	0	1	0	0	0	0.0138685
10784	3264.5	1	0	1	0	0	0	0.0139379
10786	3264.53	1	0	1	0	0	0	0.0140854
10788	3264.56	1	0	1	0	0	0	0.0139515
10790	3264.6	1	0	1	0	0	0	0.0138556
10792	3264.63	1	0	1	0	0	0	0.013919
10794	3264.66	1	0	1	0	0	0	0.013752
10796	3264.7	1	0	1	0	0	0	0.0138106
10798	3264.73	1	0	1	0	0	0	0.0138556
10800	3264.76	1	0	1	0	0	0	0.0137935
10802	3264.8	1	0	1	0	0	0	0.0137712
10804	3264.83	1	0	1	0	0	0	0.0137558
10806	3264.86	1	0	1	0	0	0	0.0138549
10808	3264.9	1	0	1	0	0	0	0.0137733
10810	3264.93	1	0	1	0	0	0	0.0137774
10812	3264.96	1	0	1	0	0	0	0.0137708
10814	3265	1	0	1	0	0	0	0.0137956
10816	3265.03	1	0	1	0	0	0	0.0138465
10818	3265.06	1	0	1	0	0	0	0.0138008
10820	3265.1	1	0	1	0	0	0	0.0138531
10822	3265.13	1	0	1	0	0	0	0.0138943
10824	3265.16	1	0	1	0	0	0	0.0138298
10826	3265.2	1	0	1	0	0	0	0.0138395
10828	3265.23	1	0	1	0	0	0	0.0138074
10830	3265.26	1	0	1	0	0	0	0.0138807
10832	3265.3	1	0	1	0	0	0	0.0137876
10834	3265.33	1	0	1	0	0	0	0.0137607
10836	3265.36	1	0	1	0	0	0	0.0137523
10838	3265.4	1	0	1	0	0	0	0.0138095
10840	3265.43	1	0	1	0	0	0	0.0138259
10842	3265.46	1	0	1	0	0	0	0.0137572
10844	3265.5	1	0	1	0	0	0	0.0137105
10846	3265.53	1	0	1	0	0	0	0.0137956
10848	3265.56	1	0	1	0	0	0	0.0137806
10850	3265.6	1	0	1	0	0	0	0.0138106
10852	3265.63	1	0	1	0	0	0	0.0138343
10854	3265.66	1	0	1	0	0	0	0.0137642
10856	3265.7	1	0	1	0	0	0	0.013828
10858	3265.73	1	0	1	0	0	0	0.013738
10860	3265.76	1	0	1	0	0	0	0.0137935
10862	3265.8	1	0	1	0	0	0	0.013782
10864	3265.83	1	0	1	0	0	0	0.0137154
10866	3265.86	1	0	1	0	0	0	0.0137349
10868	3265.9	1	0	1	0	0	0	0.0137848
10870	3265.93	1	0	1	0	0	0	0.0137576
10872	3265.96	1	0	1	0	0	0	0.0137907
10874	3266	1	0	1	0	0	0	0.0137077
10876	3266.03	1	0	1	0	0	0	0.0137018
10878	3266.06	1	0	1	0	0	0	0.0137454
10880	3266.1	1	0	1	0	0	0	0.0135696
10882	3266.13	1	0	1	0	0	0	0.0136404
10884	3266.16	1	0	1	0	0	0	0.0135428
10886	3266.2	1	0	1	0	0	0	0.0137136
10888	3266.23	1	0	1	0	0	0	0.0136174
10890	3266.26	1	0	1	0	0	0	0.0134824
10892	3266.3	1	0	1	0	0	0	0.013722
10894	3266.33	1	0	1	0	0	0	0.0138618
10896	3266.36	1	0	1	0	0	0	0.0138385
10898	3266.4	1	0	1	0	0	0	0.0139187
10900	3266.43	1	0	1	0	0	0	0.0139999
10902	3266.46	1	0	1	0	0	0	0.0140268
10904	3266.5	1	0	1	0	0	0	0.0140268
10906	3266.53	1	0	1	0	0	0	0.0135762
10908	3266.56	1	0	1	0	0	0	0.0132767
10910	3266.6	1	0	1	0	0	0	0.013472
10912	3266.63	1	0	1	0	0	0	0.0133395
10914	3266.66	1	0	1	0	0	0	0.0132279
10916	3266.7	1	0	1	0	0	0	0.0132931
10918	3266.73	1	0	1	0	0	0	0.013366
10920	3266.76	1	0	1	0	0	0	0.0133792
10922	3266.8	1	0	1	0	0	0	0.0133761
10924	3266.83	1	0	1	0	0	0	0.0134685
10926	3266.86	1	0	1	0	0	0	0.0135515
10928	3266.9	1	0	1	0	0	0	0.0135114
10930	3266.93	1	0	1	0	0	0	0.0135588
10932	3266.96	1	0	1	0	0	0	0.0136481
10934	3267	1	0	1	0	0	0	0.0137387
10936	3267.03	1	0	1	0	0	0	0.0136449
10938	3267.06	1	0	1	0	0	0	0.013556
10940	3267.1	1	0	1	0	0	0	0.0136111
10942	3267.13	1	0	1	0	0	0	0.0136031
10944	3267.16	1	0	1	0	0	0	0.0135871
10946	3267.2	1	0	1	0	0	0	0.0135361
10948	3267.23	1	0	1	0	0	0	0.0135581
10950	3267.26	1	0	1	0	0	0	0.0135445
10952	3267.3	1	0	1	0	0	0	0.0134584
10954	3267.33	1	0	1	0	0	0	0.0136627
10956	3267.36	1	0	1	0	0	0	0.0136191
10958	3267.4	1	0	1	0	0	0	0.013549
10960	3267.43	1	0	1	0	0	0	0.0136537
10962	3267.46	1	0	1	0	0	0	0.0136163
10964	3267.5	1	0	1	0	0	0	0.0137046
10966	3267.53	1	0	1	0	0	0	0.0136069
10968	3267.56	1	0	1	0	0	0	0.0134877
10970	3267.6	1	0	1	0	0	0	0.0136202
10972	3267.63	1	0	1	0	0	0	0.01357
10974	3267.66	1	0	1	0	0	0	0.0135822
10976	3267.7	1	0	1	0	0	0	0.0135937
10978	3267.73	1	0	1	0	0	0	0.0136122
10980	3267.76	1	0	1	0	0	0	0.0136289
10982	3267.8	1	0	1	0	0	0	0.0136184
10984	3267.83	1	0	1	0	0	0	0.0135783
10986	3267.86	1	0	1	0	0	0	0.0136048
10988	3267.9	1	0	1	0	0	0	0.0135933
10990	3267.93	1	0	1	0	0	0	0.0136146
10992	3267.96	1	0	1	0	0	0	0.0135714
10994	3268	1	0	1	0	0	0	0.0135466
10996	3268.03	1	0	1	0	0	0	0.0136495
10998	3268.06	1	0	1	0	0	0	0.0135658
11000	3268.1	1	0	1	0	0	0	0.0135354
11002	3268.13	1	0	1	0	0	0	0.0136156
11004	3268.16	1	0	1	0	0	0	0.0136474
11006	3268.2	1	0	1	0	0	0	0.0135703
11008	3268.23	1	0	1	0	0	0	0.0135759
11010	3268.26	1	0	1	0	0	0	0.0135612
11012	3268.3	1	0	1	0	0	0	0.0135218
11014	3268.33	1	0	1	0	0	0	0.0135951
11016	3268.36	1	0	1	0	0	0	0.0134577
11018	3268.4	1	0	1	0	0	0	0.0133918
11020	3268.43	1	0	1	0	0	0	0.0134891
11022	3268.46	1	0	1	0	0	0	0.0133185
11024	3268.5	1	0	1	0	0	0	0.0132467
11026	3268.53	1	0	1	0	0	0	0.0134511
11028	3268.56	1	0	1	0	0	0	0.0134322
11030	3268.6	1	0	1	0	0	0	0.0132927
11032	3268.63	1	0	1	0	0	0	0.0131885
11034	3268.66	1	0	1	0	0	0	0.0136477
11036	3268.7	1	0	1	0	0	0	0.0137813
11038	3268.73	1	0	1	0	0	0	0.0137987
11040	3268.76	1	0	1	0	0	0	0.0138179
11042	3268.8	1	0	1	0	0	0	0.0138803
11044	3268.83	1	0	1	0	0	0	0.0141146
11046	3268.86	1	0	1	0	0	0	0.0140969
11048	3268.9	1	0	1	0	0	0	0.0141806
11050	3268.93	1	0	1	0	0	0	0.014101
11052	3268.96	1	0	1	0	0	0	0.014085
11054	3269	1	0	1	0	0	0	0.0140515
11056	3269.03	1	0	1	0	0	0	0.0139644
11058	3269.06	1	0	1	0	0	0	0.0141471
11060	3269.1	1	0	1	0	0	0	0.0139699
11062	3269.13	1	0	1	0	0	0	0.0139609
11064	3269.16	1	0	1	0	0	0	0.0139542
11066	3269.2	1	0	1	0	0	0	0.0140163
11068	3269.23	1	0	1	0	0	0	0.0140843
11070	3269.26	1	0	1	0	0	0	0.0138807
11072	3269.3	1	0	1	0	0	0	0.01373
11074	3269.33	1	0	1	0	0	0	0.0138106
11076	3269.36	1	0	1	0	0	0	0.0137607
11078	3269.4	1	0	1	0	0	0	0.0138563
11080	3269.43	1	0	1	0	0	0	0.013896
11082	3269.46	1	0	1	0	0	0	0.0138329
11084	3269.5	1	0	1	0	0	0	0.0141289
11086	3269.53	1	0	1	0	0	0	0.0141513
11088	3269.56	1	0	1	0	0	0	0.0142942
11090	3269.6	1	0	1	0	0	0	0.0142179
11092	3269.63	1	0	1	0	0	0	0.0140519
11094	3269.66	1	0	1	0	0	0	0.0142984
11096	3269.7	1	0	1	0	0	0	0.0142911
11098	3269.73	1	0	1	0	0	0	0.0142356
11100	3269.76	1	0	1	0	0	0	0.0141861
11102	3269.8	1	0	1	0	0	0	0.0137161
11104	3269.83	1	0	1	0	0	0	0.0135602
11106	3269.86	1	0	1	0	0	0	0.0136554
11108	3269.9	1	0	1	0	0	0	0.013397
11110	3269.93	1	0	1	0	0	0	0.0133709
11112	3269.96	1	0	1	0	0	0	0.0135543
11114	3270	1	0	1	0	0	0	0.0135009
11116	3270.03	1	0	1	0	0	0	0.0132823
11118	3270.06	1	0	1	0	0	0	0.0133185
11120	3270.1	1	0	1	0	0	0	0.0133123
[truncated: 34,161 more rows]

## Sheet: Mouse_1_470_Signal
FrameCounter	Timestamp	LedState	Stimulation	Output0	Output1	Input0	Input1	Region0G
7123	3203.48	2	0	1	0	0	0	0.030748
7125	3203.52	2	0	1	0	0	0	0.0306162
7127	3203.55	2	0	1	0	0	0	0.0306887
7129	3203.58	2	0	1	0	0	0	0.0302797
7131	3203.62	2	0	1	0	0	0	0.0304146
7133	3203.65	2	0	1	0	0	0	0.0303069
7135	3203.68	2	0	1	0	0	0	0.0306601
7137	3203.72	2	0	1	0	0	0	0.0305057
7139	3203.75	2	0	1	0	0	0	0.0305468
7141	3203.78	2	0	1	0	0	0	0.0311616
7143	3203.82	2	0	1	0	0	0	0.0312944
7145	3203.85	2	0	1	0	0	0	0.0313882
7147	3203.88	2	0	1	0	0	0	0.0312704
7149	3203.92	2	0	1	0	0	0	0.0310071
7151	3203.95	2	0	1	0	0	0	0.0309914
7153	3203.98	2	0	1	0	0	0	0.0307982
7155	3204.02	2	0	1	0	0	0	0.0308334
7157	3204.05	2	0	1	0	0	0	0.0310176
7159	3204.08	2	0	1	0	0	0	0.0306183
7161	3204.12	2	0	1	0	0	0	0.0307117
7163	3204.15	2	0	1	0	0	0	0.0305053
7165	3204.18	2	0	1	0	0	0	0.0302982
7167	3204.22	2	0	1	0	0	0	0.0307759
7169	3204.25	2	0	1	0	0	0	0.0305663
7171	3204.28	2	0	1	0	0	0	0.0305287
7173	3204.32	2	0	1	0	0	0	0.0303425
7175	3204.35	2	0	1	0	0	0	0.0304087
7177	3204.38	2	0	1	0	0	0	0.0306811
7179	3204.42	2	0	1	0	0	0	0.0309154
7181	3204.45	2	0	1	0	0	0	0.0308021
7183	3204.48	2	0	1	0	0	0	0.0309862
7185	3204.52	2	0	1	0	0	0	0.0308094
7187	3204.55	2	0	1	0	0	0	0.0309921
7189	3204.58	2	0	1	0	0	0	0.0308715
7191	3204.62	2	0	1	0	0	0	0.0308031
7193	3204.65	2	0	1	0	0	0	0.0308042
7195	3204.68	2	0	1	0	0	0	0.030635
7197	3204.72	2	0	1	0	0	0	0.0306525
7199	3204.75	2	0	1	0	0	0	0.0307853
7201	3204.78	2	0	1	0	0	0	0.0306528
7203	3204.82	2	0	1	0	0	0	0.0307306
7205	3204.85	2	0	1	0	0	0	0.0304725
7207	3204.88	2	0	1	0	0	0	0.0303442
7209	3204.92	2	0	1	0	0	0	0.0306193
7211	3204.95	2	0	1	0	0	0	0.0308097
7213	3204.98	2	0	1	0	0	0	0.0310005
7215	3205.02	2	0	1	0	0	0	0.0310545
7217	3205.05	2	0	1	0	0	0	0.0308889
7219	3205.08	2	0	1	0	0	0	0.0306434
7221	3205.12	2	0	1	0	0	0	0.0307529
7223	3205.15	2	0	1	0	0	0	0.0310723
7225	3205.18	2	0	1	0	0	0	0.0313223
7227	3205.22	2	0	1	0	0	0	0.0312732
7229	3205.25	2	0	1	0	0	0	0.0313945
7231	3205.28	2	0	1	0	0	0	0.0311309
7233	3205.32	2	0	1	0	0	0	0.0296123
7235	3205.35	2	0	1	0	0	0	0.0298518
7237	3205.38	2	0	1	0	0	0	0.0298166
7239	3205.42	2	0	1	0	0	0	0.0300447
7241	3205.45	2	0	1	0	0	0	0.0305227
7243	3205.48	2	0	1	0	0	0	0.0306085
7245	3205.52	2	0	1	0	0	0	0.0312132
7247	3205.55	2	0	1	0	0	0	0.031217
7249	3205.58	2	0	1	0	0	0	0.0313722
7251	3205.62	2	0	1	0	0	0	0.0315539
7253	3205.65	2	0	1	0	0	0	0.0314336
7255	3205.68	2	0	1	0	0	0	0.0316843
7257	3205.72	2	0	1	0	0	0	0.0316641
7259	3205.75	2	0	1	0	0	0	0.0307961
7261	3205.78	2	0	1	0	0	0	0.0302305
7263	3205.82	2	0	1	0	0	0	0.0287757
7265	3205.85	2	0	1	0	0	0	0.0282199
7267	3205.88	2	0	1	0	0	0	0.0287475
7269	3205.92	2	0	1	0	0	0	0.0283503
7271	3205.95	2	0	1	0	0	0	0.0290571
7273	3205.98	2	0	1	0	0	0	0.0293141
7275	3206.02	2	0	1	0	0	0	0.0290268
7277	3206.05	2	0	1	0	0	0	0.0295593
7279	3206.08	2	0	1	0	0	0	0.0298745
7281	3206.12	2	0	1	0	0	0	0.0300998
7283	3206.15	2	0	1	0	0	0	0.0303526
7285	3206.18	2	0	1	0	0	0	0.0301026
7287	3206.22	2	0	1	0	0	0	0.0306922
7289	3206.25	2	0	1	0	0	0	0.0302274
7291	3206.28	2	0	1	0	0	0	0.0305343
7293	3206.32	2	0	1	0	0	0	0.0297803
7295	3206.35	2	0	1	0	0	0	0.0297863
7297	3206.38	2	0	1	0	0	0	0.0304861
7299	3206.42	2	0	1	0	0	0	0.0304398
7301	3206.45	2	0	1	0	0	0	0.0297315
7303	3206.48	2	0	1	0	0	0	0.0302427
7305	3206.52	2	0	1	0	0	0	0.0305942
7307	3206.55	2	0	1	0	0	0	0.0304359
7309	3206.58	2	0	1	0	0	0	0.0310214
7311	3206.62	2	0	1	0	0	0	0.0311421
7313	3206.65	2	0	1	0	0	0	0.0314381
7315	3206.68	2	0	1	0	0	0	0.0316801
7317	3206.72	2	0	1	0	0	0	0.0315668
7319	3206.75	2	0	1	0	0	0	0.0307016
7321	3206.78	2	0	1	0	0	0	0.0307668
7323	3206.82	2	0	1	0	0	0	0.030792
7325	3206.85	2	0	1	0	0	0	0.0302703
7327	3206.88	2	0	1	0	0	0	0.0302839
7329	3206.92	2	0	1	0	0	0	0.0301078
7331	3206.95	2	0	1	0	0	0	0.0304603
7333	3206.98	2	0	1	0	0	0	0.0302807
7335	3207.02	2	0	1	0	0	0	0.0302044
7337	3207.05	2	0	1	0	0	0	0.0301995
7339	3207.08	2	0	1	0	0	0	0.0301556
7341	3207.12	2	0	1	0	0	0	0.0302148
7343	3207.15	2	0	1	0	0	0	0.0306141
7345	3207.18	2	0	1	0	0	0	0.0303275
7347	3207.22	2	0	1	0	0	0	0.0302773
7349	3207.25	2	0	1	0	0	0	0.0302745
7351	3207.28	2	0	1	0	0	0	0.0304335
7353	3207.32	2	0	1	0	0	0	0.0308868
7355	3207.35	2	0	1	0	0	0	0.0308512
7357	3207.38	2	0	1	0	0	0	0.031209
7359	3207.42	2	0	1	0	0	0	0.0311159
7361	3207.45	2	0	1	0	0	0	0.0316982
7363	3207.48	2	0	1	0	0	0	0.0315239
7365	3207.52	2	0	1	0	0	0	0.0304289
7367	3207.55	2	0	1	0	0	0	0.029795
7369	3207.58	2	0	1	0	0	0	0.0296025
7371	3207.62	2	0	1	0	0	0	0.0297319
7373	3207.65	2	0	1	0	0	0	0.0297971
7375	3207.68	2	0	1	0	0	0	0.0293699
7377	3207.72	2	0	1	0	0	0	0.0302525
7379	3207.75	2	0	1	0	0	0	0.0302842
7381	3207.78	2	0	1	0	0	0	0.0309395
7383	3207.82	2	0	1	0	0	0	0.0314127
7385	3207.85	2	0	1	0	0	0	0.0311058
7387	3207.88	2	0	1	0	0	0	0.031435
7389	3207.92	2	0	1	0	0	0	0.0316411
7391	3207.95	2	0	1	0	0	0	0.0314099
7393	3207.98	2	0	1	0	0	0	0.0318722
7395	3208.02	2	0	1	0	0	0	0.0314158
7397	3208.05	2	0	1	0	0	0	0.0314081
7399	3208.08	2	0	1	0	0	0	0.0309415
7401	3208.12	2	0	1	0	0	0	0.0310472
7403	3208.15	2	0	1	0	0	0	0.0309123
7405	3208.18	2	0	1	0	0	0	0.030898
7407	3208.22	2	0	1	0	0	0	0.0308833
7409	3208.25	2	0	1	0	0	0	0.0302466
7411	3208.28	2	0	1	0	0	0	0.0297406
7413	3208.32	2	0	1	0	0	0	0.0296008
7415	3208.35	2	0	1	0	0	0	0.029108
7417	3208.38	2	0	1	0	0	0	0.029713
7419	3208.42	2	0	1	0	0	0	0.0294881
7421	3208.45	2	0	1	0	0	0	0.0288838
7423	3208.48	2	0	1	0	0	0	0.0290774
7425	3208.52	2	0	1	0	0	0	0.0296022
7427	3208.55	2	0	1	0	0	0	0.0296988
7429	3208.58	2	0	1	0	0	0	0.0296259
7431	3208.62	2	0	1	0	0	0	0.0295861
7433	3208.65	2	0	1	0	0	0	0.0297741
7435	3208.68	2	0	1	0	0	0	0.0297626
7437	3208.72	2	0	1	0	0	0	0.0297793
7439	3208.75	2	0	1	0	0	0	0.0294477
7441	3208.78	2	0	1	0	0	0	0.029221
7443	3208.82	2	0	1	0	0	0	0.0292733
7445	3208.85	2	0	1	0	0	0	0.0292779
7447	3208.88	2	0	1	0	0	0	0.0290589
7449	3208.92	2	0	1	0	0	0	0.0288061
7451	3208.95	2	0	1	0	0	0	0.0287663
7453	3208.98	2	0	1	0	0	0	0.0288211
7455	3209.02	2	0	1	0	0	0	0.0291175
7457	3209.05	2	0	1	0	0	0	0.0290882
7459	3209.08	2	0	1	0	0	0	0.0291056
7461	3209.12	2	0	1	0	0	0	0.0291698
7463	3209.15	2	0	1	0	0	0	0.0292273
7465	3209.18	2	0	1	0	0	0	0.0288479
7467	3209.22	2	0	1	0	0	0	0.0295321
7469	3209.25	2	0	1	0	0	0	0.0294041
7471	3209.28	2	0	1	0	0	0	0.0294369
7473	3209.32	2	0	1	0	0	0	0.0291799
7475	3209.35	2	0	1	0	0	0	0.0294163
7477	3209.38	2	0	1	0	0	0	0.0298082
7479	3209.42	2	0	1	0	0	0	0.029439
7481	3209.45	2	0	1	0	0	0	0.0289612
7483	3209.48	2	0	1	0	0	0	0.0287109
7485	3209.52	2	0	1	0	0	0	0.0284873
7487	3209.55	2	0	1	0	0	0	0.0282293
7489	3209.58	2	0	1	0	0	0	0.0285766
7491	3209.62	2	0	1	0	0	0	0.0285707
7493	3209.65	2	0	1	0	0	0	0.0282052
7495	3209.68	2	0	1	0	0	0	0.0280954
7497	3209.72	2	0	1	0	0	0	0.0277111
7499	3209.75	2	0	1	0	0	0	0.0273791
7501	3209.78	2	0	1	0	0	0	0.0274583
7503	3209.82	2	0	1	0	0	0	0.0278283
7505	3209.85	2	0	1	0	0	0	0.0278548
7507	3209.88	2	0	1	0	0	0	0.0276752
7509	3209.92	2	0	1	0	0	0	0.0274063
7511	3209.95	2	0	1	0	0	0	0.0269617
7513	3209.98	2	0	1	0	0	0	0.0268045
7515	3210.02	2	0	1	0	0	0	0.0273157
7517	3210.05	2	0	1	0	0	0	0.0274754
7519	3210.08	2	0	1	0	0	0	0.0273579
7521	3210.12	2	0	1	0	0	0	0.0271466
7523	3210.15	2	0	1	0	0	0	0.0266225
7525	3210.18	2	0	1	0	0	0	0.0263557
7527	3210.22	2	0	1	0	0	0	0.026356
7529	3210.25	2	0	1	0	0	0	0.0266137
7531	3210.28	2	0	1	0	0	0	0.0266179
7533	3210.32	2	0	1	0	0	0	0.0271047
7535	3210.35	2	0	1	0	0	0	0.0276062
7537	3210.38	2	0	1	0	0	0	0.0274339
7539	3210.42	2	0	1	0	0	0	0.0274165
7541	3210.45	2	0	1	0	0	0	0.026923
7543	3210.48	2	0	1	0	0	0	0.0265098
7545	3210.52	2	0	1	0	0	0	0.0268582
7547	3210.55	2	0	1	0	0	0	0.0271099
7549	3210.58	2	0	1	0	0	0	0.0274332
7551	3210.62	2	0	1	0	0	0	0.0275967
7553	3210.65	2	0	1	0	0	0	0.0295453
7555	3210.68	2	0	1	0	0	0	0.0298585
7557	3210.72	2	0	1	0	0	0	0.0291813
7559	3210.75	2	0	1	0	0	0	0.030091
7561	3210.78	2	0	1	0	0	0	0.0302675
7563	3210.82	2	0	1	0	0	0	0.0305304
7565	3210.85	2	0	1	0	0	0	0.0302581
7567	3210.88	2	0	1	0	0	0	0.0300269
7569	3210.92	2	0	1	0	0	0	0.0301643
7571	3210.95	2	0	1	0	0	0	0.0309747
7573	3210.98	2	0	1	0	0	0	0.0300161
7575	3211.02	2	0	1	0	0	0	0.0286955
7577	3211.05	2	0	1	0	0	0	0.0291879
7579	3211.08	2	0	1	0	0	0	0.0278872
7581	3211.12	2	0	1	0	0	0	0.0274817
7583	3211.15	2	0	1	0	0	0	0.0282785
7585	3211.18	2	0	1	0	0	0	0.0273136
7587	3211.22	2	0	1	0	0	0	0.0273303
7589	3211.25	2	0	1	0	0	0	0.0279207
7591	3211.28	2	0	1	0	0	0	0.0278614
7593	3211.32	2	0	1	0	0	0	0.0284211
7595	3211.35	2	0	1	0	0	0	0.0287105
7597	3211.38	2	0	1	0	0	0	0.0283907
7599	3211.42	2	0	1	0	0	0	0.0285006
7601	3211.45	2	0	1	0	0	0	0.0292657
7603	3211.48	2	0	1	0	0	0	0.0286439
7605	3211.52	2	0	1	0	0	0	0.028403
7607	3211.55	2	0	1	0	0	0	0.0290631
7609	3211.58	2	0	1	0	0	0	0.0287286
7611	3211.62	2	0	1	0	0	0	0.0289016
7613	3211.65	2	0	1	0	0	0	0.0296642
7615	3211.68	2	0	1	0	0	0	0.0296245
7617	3211.72	2	0	1	0	0	0	0.0292611
7619	3211.75	2	0	1	0	0	0	0.0292433
7621	3211.78	2	0	1	0	0	0	0.0288301
7623	3211.82	2	0	1	0	0	0	0.0281962
7625	3211.85	2	0	1	0	0	0	0.0285665
7627	3211.88	2	0	1	0	0	0	0.028525
7629	3211.92	2	0	1	0	0	0	0.0280466
7631	3211.95	2	0	1	0	0	0	0.028624
7633	3211.98	2	0	1	0	0	0	0.0282098
7635	3212.02	2	0	1	0	0	0	0.0280215
7637	3212.05	2	0	1	0	0	0	0.0286024
7639	3212.08	2	0	1	0	0	0	0.0280044
7641	3212.12	2	0	1	0	0	0	0.0279395
7643	3212.15	2	0	1	0	0	0	0.0286212
7645	3212.18	2	0	1	0	0	0	0.0285651
7647	3212.22	2	0	1	0	0	0	0.0284692
7649	3212.25	2	0	1	0	0	0	0.0288127
7651	3212.28	2	0	1	0	0	0	0.0293208
7653	3212.32	2	0	1	0	0	0	0.0292336
7655	3212.35	2	0	1	0	0	0	0.0296269
7657	3212.38	2	0	1	0	0	0	0.0294118
7659	3212.42	2	0	1	0	0	0	0.0293884
7661	3212.45	2	0	1	0	0	0	0.0297211
7663	3212.48	2	0	1	0	0	0	0.0295628
7665	3212.52	2	0	1	0	0	0	0.0292381
7667	3212.55	2	0	1	0	0	0	0.0287761
7669	3212.58	2	0	1	0	0	0	0.0290195
7671	3212.62	2	0	1	0	0	0	0.0293933
7673	3212.65	2	0	1	0	0	0	0.0292653
7675	3212.68	2	0	1	0	0	0	0.0295338
7677	3212.72	2	0	1	0	0	0	0.0292859
7679	3212.75	2	0	1	0	0	0	0.0294187
7681	3212.78	2	0	1	0	0	0	0.0289978
7683	3212.82	2	0	1	0	0	0	0.0284804
7685	3212.85	2	0	1	0	0	0	0.0290024
7687	3212.88	2	0	1	0	0	0	0.0282767
7689	3212.92	2	0	1	0	0	0	0.0284912
7691	3212.95	2	0	1	0	0	0	0.0294379
7693	3212.98	2	0	1	0	0	0	0.0304133
7695	3213.02	2	0	1	0	0	0	0.0306179
7697	3213.05	2	0	1	0	0	0	0.0307184
7699	3213.08	2	0	1	0	0	0	0.0311536
7701	3213.12	2	0	1	0	0	0	0.0311658
7703	3213.15	2	0	1	0	0	0	0.031322
7705	3213.18	2	0	1	0	0	0	0.0308568
7707	3213.22	2	0	1	0	0	0	0.0307086
7709	3213.25	2	0	1	0	0	0	0.0313474
7711	3213.28	2	0	1	0	0	0	0.0309245
7713	3213.32	2	0	1	0	0	0	0.0308216
7715	3213.35	2	0	1	0	0	0	0.0307267
7717	3213.38	2	0	1	0	0	0	0.0303324
7719	3213.42	2	0	1	0	0	0	0.0291237
7721	3213.45	2	0	1	0	0	0	0.0290547
7723	3213.48	2	0	1	0	0	0	0.0294986
7725	3213.52	2	0	1	0	0	0	0.0291855
7727	3213.55	2	0	1	0	0	0	0.0293922
7729	3213.58	2	0	1	0	0	0	0.0296419
7731	3213.62	2	0	1	0	0	0	0.0295422
7733	3213.65	2	0	1	0	0	0	0.0299453
7735	3213.68	2	0	1	0	0	0	0.029289
7737	3213.72	2	0	1	0	0	0	0.0291143
7739	3213.75	2	0	1	0	0	0	0.0289312
7741	3213.78	2	0	1	0	0	0	0.0293469
7743	3213.82	2	0	1	0	0	0	0.0287307
7745	3213.85	2	0	1	0	0	0	0.028857
7747	3213.88	2	0	1	0	0	0	0.0293235
7749	3213.92	2	0	1	0	0	0	0.029023
7751	3213.95	2	0	1	0	0	0	0.0291279
7753	3213.98	2	0	1	0	0	0	0.0296297
7755	3214.02	2	0	1	0	0	0	0.0285396
7757	3214.05	2	0	1	0	0	0	0.0289354
7759	3214.08	2	0	1	0	0	0	0.0293284
7761	3214.12	2	0	1	0	0	0	0.0292963
7763	3214.15	2	0	1	0	0	0	0.0285672
7765	3214.18	2	0	1	0	0	0	0.029159
7767	3214.22	2	0	1	0	0	0	0.0289281
7769	3214.25	2	0	1	0	0	0	0.0285083
7771	3214.28	2	0	1	0	0	0	0.0289762
7773	3214.32	2	0	1	0	0	0	0.0291133
7775	3214.35	2	0	1	0	0	0	0.0291638
7777	3214.38	2	0	1	0	0	0	0.0292503
7779	3214.42	2	0	1	0	0	0	0.02919
7781	3214.45	2	0	1	0	0	0	0.0292597
7783	3214.48	2	0	1	0	0	0	0.0290721
7785	3214.52	2	0	1	0	0	0	0.0290379
7787	3214.55	2	0	1	0	0	0	0.0291436
7789	3214.58	2	0	1	0	0	0	0.0291917
7791	3214.62	2	0	1	0	0	0	0.0292325
7793	3214.65	2	0	1	0	0	0	0.0290027
7795	3214.68	2	0	1	0	0	0	0.0288612
7797	3214.72	2	0	1	0	0	0	0.0293364
7799	3214.75	2	0	1	0	0	0	0.0292573
7801	3214.78	2	0	1	0	0	0	0.0292838
7803	3214.82	2	0	1	0	0	0	0.0291872
7805	3214.85	2	0	1	0	0	0	0.0289696
7807	3214.88	2	0	1	0	0	0	0.0290362
7809	3214.92	2	0	1	0	0	0	0.0287956
7811	3214.95	2	0	1	0	0	0	0.0290753
7813	3214.98	2	0	1	0	0	0	0.0291
7815	3215.02	2	0	1	0	0	0	0.028601
7817	3215.05	2	0	1	0	0	0	0.0285968
7819	3215.08	2	0	1	0	0	0	0.0289365
7821	3215.12	2	0	1	0	0	0	0.0284964
7823	3215.15	2	0	1	0	0	0	0.028117
7825	3215.18	2	0	1	0	0	0	0.0287164
7827	3215.22	2	0	1	0	0	0	0.0286045
7829	3215.25	2	0	1	0	0	0	0.0285505
7831	3215.28	2	0	1	0	0	0	0.0290303
7833	3215.32	2	0	1	0	0	0	0.0294292
7835	3215.35	2	0	1	0	0	0	0.0291398
7837	3215.38	2	0	1	0	0	0	0.0287185
7839	3215.42	2	0	1	0	0	0	0.0289818
7841	3215.45	2	0	1	0	0	0	0.0277027
7843	3215.48	2	0	1	0	0	0	0.027965
7845	3215.52	2	0	1	0	0	0	0.0283119
7847	3215.55	2	0	1	0	0	0	0.0277767
7849	3215.58	2	0	1	0	0	0	0.0278869
7851	3215.62	2	0	1	0	0	0	0.0283374
7853	3215.65	2	0	1	0	0	0	0.0285016
7855	3215.68	2	0	1	0	0	0	0.0292943
7857	3215.72	2	0	1	0	0	0	0.0300827
7859	3215.75	2	0	1	0	0	0	0.0304146
7861	3215.78	2	0	1	0	0	0	0.0303714
7863	3215.82	2	0	1	0	0	0	0.03046
7865	3215.85	2	0	1	0	0	0	0.0302706
7867	3215.88	2	0	1	0	0	0	0.0304788
7869	3215.92	2	0	1	0	0	0	0.0303585
7871	3215.95	2	0	1	0	0	0	0.0302682
7873	3215.98	2	0	1	0	0	0	0.0303383
7875	3216.02	2	0	1	0	0	0	0.0301503
7877	3216.05	2	0	1	0	0	0	0.0302253
7879	3216.08	2	0	1	0	0	0	0.0303634
7881	3216.12	2	0	1	0	0	0	0.0301754
7883	3216.15	2	0	1	0	0	0	0.0302616
7885	3216.18	2	0	1	0	0	0	0.0301291
7887	3216.22	2	0	1	0	0	0	0.0300286
7889	3216.25	2	0	1	0	0	0	0.0301012
7891	3216.28	2	0	1	0	0	0	0.0301688
7893	3216.32	2	0	1	0	0	0	0.0303861
7895	3216.35	2	0	1	0	0	0	0.0302134
7897	3216.38	2	0	1	0	0	0	0.0300321
7899	3216.42	2	0	1	0	0	0	0.0302152
7901	3216.45	2	0	1	0	0	0	0.0301353
7903	3216.48	2	0	1	0	0	0	0.0301803
7905	3216.52	2	0	1	0	0	0	0.0303355
7907	3216.55	2	0	1	0	0	0	0.0301113
7909	3216.58	2	0	1	0	0	0	0.0304663
7911	3216.62	2	0	1	0	0	0	0.030461
7913	3216.65	2	0	1	0	0	0	0.0302898
7915	3216.68	2	0	1	0	0	0	0.0303732
7917	3216.72	2	0	1	0	0	0	0.0301169
7919	3216.75	2	0	1	0	0	0	0.0300544
7921	3216.78	2	0	1	0	0	0	0.0301053
7923	3216.82	2	0	1	0	0	0	0.0301413
7925	3216.85	2	0	1	0	0	0	0.0301196
7927	3216.88	2	0	1	0	0	0	0.0295924
7929	3216.92	2	0	1	0	0	0	0.0298728
7931	3216.95	2	0	1	0	0	0	0.0302197
7933	3216.98	2	0	1	0	0	0	0.0302874
7935	3217.02	2	0	1	0	0	0	0.0305695
7937	3217.05	2	0	1	0	0	0	0.0311176
7939	3217.08	2	0	1	0	0	0	0.0314332
7941	3217.12	2	0	1	0	0	0	0.0311312
7943	3217.15	2	0	1	0	0	0	0.0309851
7945	3217.18	2	0	1	0	0	0	0.030922
7947	3217.22	2	0	1	0	0	0	0.0309464
7949	3217.25	2	0	1	0	0	0	0.0298721
7951	3217.28	2	0	1	0	0	0	0.0287534
7953	3217.32	2	0	1	0	0	0	0.0290421
7955	3217.35	2	0	1	0	0	0	0.0288971
7957	3217.38	2	0	1	0	0	0	0.0290889
7959	3217.42	2	0	1	0	0	0	0.0292859
7961	3217.45	2	0	1	0	0	0	0.0291004
7963	3217.48	2	0	1	0	0	0	0.0288231
7965	3217.52	2	0	1	0	0	0	0.0289654
7967	3217.55	2	0	1	0	0	0	0.0296398
7969	3217.58	2	0	1	0	0	0	0.0294819
7971	3217.62	2	0	1	0	0	0	0.0291851
7973	3217.65	2	0	1	0	0	0	0.029214
7975	3217.68	2	0	1	0	0	0	0.0290233
7977	3217.72	2	0	1	0	0	0	0.0292688
7979	3217.75	2	0	1	0	0	0	0.0289853
7981	3217.78	2	0	1	0	0	0	0.0291917
7983	3217.82	2	0	1	0	0	0	0.0308003
7985	3217.85	2	0	1	0	0	0	0.0315462
7987	3217.88	2	0	1	0	0	0	0.0312683
7989	3217.92	2	0	1	0	0	0	0.0320525
7991	3217.95	2	0	1	0	0	0	0.0322353
7993	3217.98	2	0	1	0	0	0	0.0311574
7995	3218.02	2	0	1	0	0	0	0.0305559
7997	3218.05	2	0	1	0	0	0	0.0296018
7999	3218.08	2	0	1	0	0	0	0.0288608
8001	3218.12	2	0	1	0	0	0	0.0293441
8003	3218.15	2	0	1	0	0	0	0.0297036
8005	3218.18	2	0	1	0	0	0	0.0294979
8007	3218.22	2	0	1	0	0	0	0.0300855
8009	3218.25	2	0	1	0	0	0	0.0302692
8011	3218.28	2	0	1	0	0	0	0.0304115
8013	3218.32	2	0	1	0	0	0	0.0305325
8015	3218.35	2	0	1	0	0	0	0.0310772
8017	3218.38	2	0	1	0	0	0	0.0311835
8019	3218.42	2	0	1	0	0	0	0.0306696
8021	3218.45	2	0	1	0	0	0	0.0304119
8023	3218.48	2	0	1	0	0	0	0.0305866
8025	3218.52	2	0	1	0	0	0	0.0308314
8027	3218.55	2	0	1	0	0	0	0.0307878
8029	3218.58	2	0	1	0	0	0	0.0303714
8031	3218.62	2	0	1	0	0	0	0.029961
8033	3218.65	2	0	1	0	0	0	0.0304561
8035	3218.68	2	0	1	0	0	0	0.0298696
8037	3218.72	2	0	1	0	0	0	0.0294766
8039	3218.75	2	0	1	0	0	0	0.0286687
8041	3218.78	2	0	1	0	0	0	0.0287478
8043	3218.82	2	0	1	0	0	0	0.0284891
8045	3218.85	2	0	1	0	0	0	0.0286823
8047	3218.88	2	0	1	0	0	0	0.0290903
8049	3218.92	2	0	1	0	0	0	0.0285787
8051	3218.95	2	0	1	0	0	0	0.0284096
8053	3218.98	2	0	1	0	0	0	0.0285327
8055	3219.02	2	0	1	0	0	0	0.0285351
8057	3219.05	2	0	1	0	0	0	0.0285463
8059	3219.08	2	0	1	0	0	0	0.0283179
8061	3219.12	2	0	1	0	0	0	0.0282471
8063	3219.15	2	0	1	0	0	0	0.0282969
8065	3219.18	2	0	1	0	0	0	0.0282949
8067	3219.22	2	0	1	0	0	0	0.0284333
8069	3219.25	2	0	1	0	0	0	0.0283695
8071	3219.28	2	0	1	0	0	0	0.0282443
8073	3219.32	2	0	1	0	0	0	0.0282969
8075	3219.35	2	0	1	0	0	0	0.0282363
8077	3219.38	2	0	1	0	0	0	0.0284434
8079	3219.42	2	0	1	0	0	0	0.0284179
8081	3219.45	2	0	1	0	0	0	0.028199
8083	3219.48	2	0	1	0	0	0	0.028321
8085	3219.52	2	0	1	0	0	0	0.0282994
8087	3219.55	2	0	1	0	0	0	0.0283339
8089	3219.58	2	0	1	0	0	0	0.0284444
8091	3219.62	2	0	1	0	0	0	0.0282582
8093	3219.65	2	0	1	0	0	0	0.0283834
8095	3219.68	2	0	1	0	0	0	0.0283329
8097	3219.72	2	0	1	0	0	0	0.0283904
8099	3219.75	2	0	1	0	0	0	0.028208
8101	3219.78	2	0	1	0	0	0	0.0288521
8103	3219.82	2	0	1	0	0	0	0.0294669
8105	3219.85	2	0	1	0	0	0	0.0296607
8107	3219.88	2	0	1	0	0	0	0.0298302
8109	3219.92	2	0	1	0	0	0	0.0303215
8111	3219.95	2	0	1	0	0	0	0.0293277
8113	3219.98	2	0	1	0	0	0	0.029137
8115	3220.02	2	0	1	0	0	0	0.0292339
8117	3220.05	2	0	1	0	0	0	0.029235
8119	3220.08	2	0	1	0	0	0	0.0295903
8121	3220.12	2	0	1	0	0	0	0.0290502
8123	3220.15	2	0	1	0	0	0	0.0292078
8125	3220.18	2	0	1	0	0	0	0.0296855
8127	3220.22	2	0	1	0	0	0	0.029455
8129	3220.25	2	0	1	0	0	0	0.029674
8131	3220.28	2	0	1	0	0	0	0.0298445
8133	3220.32	2	0	1	0	0	0	0.0297884
8135	3220.35	2	0	1	0	0	0	0.0299484
8137	3220.38	2	0	1	0	0	0	0.0299334
8139	3220.42	2	0	1	0	0	0	0.0296684
8141	3220.45	2	0	1	0	0	0	0.0299847
8143	3220.48	2	0	1	0	0	0	0.0297127
8145	3220.52	2	0	1	0	0	0	0.0298867
8147	3220.55	2	0	1	0	0	0	0.0300802
8149	3220.58	2	0	1	0	0	0	0.029864
8151	3220.62	2	0	1	0	0	0	0.0299073
8153	3220.65	2	0	1	0	0	0	0.029584
8155	3220.68	2	0	1	0	0	0	0.0303062
8157	3220.72	2	0	1	0	0	0	0.0295969
8159	3220.75	2	0	1	0	0	0	0.0289159
8161	3220.78	2	0	1	0	0	0	0.029863
8163	3220.82	2	0	1	0	0	0	0.0293577
8165	3220.85	2	0	1	0	0	0	0.0293002
8167	3220.88	2	0	1	0	0	0	0.0297755
8169	3220.92	2	0	1	0	0	0	0.029584
8171	3220.95	2	0	1	0	0	0	0.0300886
8173	3220.98	2	0	1	0	0	0	0.0305796
8175	3221.02	2	0	1	0	0	0	0.0308289
8177	3221.05	2	0	1	0	0	0	0.0305126
8179	3221.08	2	0	1	0	0	0	0.0301719
8181	3221.12	2	0	1	0	0	0	0.030309
8183	3221.15	2	0	1	0	0	0	0.0291101
8185	3221.18	2	0	1	0	0	0	0.0291126
8187	3221.22	2	0	1	0	0	0	0.0296499
8189	3221.25	2	0	1	0	0	0	0.0292175
8191	3221.28	2	0	1	0	0	0	0.0289124
8193	3221.32	2	0	1	0	0	0	0.0298096
8195	3221.35	2	0	1	0	0	0	0.0305702
8197	3221.38	2	0	1	0	0	0	0.0303861
8199	3221.42	2	0	1	0	0	0	0.0304091
8201	3221.45	2	0	1	0	0	0	0.0304638
8203	3221.48	2	0	1	0	0	0	0.0307906
8205	3221.52	2	0	1	0	0	0	0.0311368
8207	3221.55	2	0	1	0	0	0	0.0312209
8209	3221.58	2	0	1	0	0	0	0.0313645
8211	3221.62	2	0	1	0	0	0	0.0309987
8213	3221.65	2	0	1	0	0	0	0.0310242
8215	3221.68	2	0	1	0	0	0	0.0313963
8217	3221.72	2	0	1	0	0	0	0.031095
8219	3221.75	2	0	1	0	0	0	0.0310249
8221	3221.78	2	0	1	0	0	0	0.0309377
8223	3221.82	2	0	1	0	0	0	0.0309569
8225	3221.85	2	0	1	0	0	0	0.0311999
8227	3221.88	2	0	1	0	0	0	0.0312488
8229	3221.92	2	0	1	0	0	0	0.0313059
8231	3221.95	2	0	1	0	0	0	0.0313499
8233	3221.98	2	0	1	0	0	0	0.0314817
8235	3222.02	2	0	1	0	0	0	0.0310671
8237	3222.05	2	0	1	0	0	0	0.0314071
8239	3222.08	2	0	1	0	0	0	0.0309726
8241	3222.12	2	0	1	0	0	0	0.0311285
8243	3222.15	2	0	1	0	0	0	0.031496
8245	3222.18	2	0	1	0	0	0	0.0312048
8247	3222.22	2	0	1	0	0	0	0.0317307
8249	3222.25	2	0	1	0	0	0	0.030951
8251	3222.28	2	0	1	0	0	0	0.0307658
8253	3222.32	2	0	1	0	0	0	0.0311633
8255	3222.35	2	0	1	0	0	0	0.0307801
8257	3222.38	2	0	1	0	0	0	0.0312962
8259	3222.42	2	0	1	0	0	0	0.0311898
8261	3222.45	2	0	1	0	0	0	0.0308244
8263	3222.48	2	0	1	0	0	0	0.0313059
8265	3222.52	2	0	1	0	0	0	0.0312397
8267	3222.55	2	0	1	0	0	0	0.031496
8269	3222.58	2	0	1	0	0	0	0.031398
8271	3222.62	2	0	1	0	0	0	0.0311065
8273	3222.65	2	0	1	0	0	0	0.0310364
8275	3222.68	2	0	1	0	0	0	0.031088
8277	3222.72	2	0	1	0	0	0	0.0302134
8279	3222.75	2	0	1	0	0	0	0.0296566
8281	3222.78	2	0	1	0	0	0	0.0293176
8283	3222.82	2	0	1	0	0	0	0.0283796
8285	3222.85	2	0	1	0	0	0	0.0286809
8287	3222.88	2	0	1	0	0	0	0.0284298
8289	3222.92	2	0	1	0	0	0	0.028027
8291	3222.95	2	0	1	0	0	0	0.0287123
8293	3222.98	2	0	1	0	0	0	0.0293274
8295	3223.02	2	0	1	0	0	0	0.0291474
8297	3223.05	2	0	1	0	0	0	0.028941
8299	3223.08	2	0	1	0	0	0	0.0293459
8301	3223.12	2	0	1	0	0	0	0.0294885
8303	3223.15	2	0	1	0	0	0	0.0296053
8305	3223.18	2	0	1	0	0	0	0.0294505
8307	3223.22	2	0	1	0	0	0	0.0294201
8309	3223.25	2	0	1	0	0	0	0.0288141
8311	3223.28	2	0	1	0	0	0	0.0291527
8313	3223.32	2	0	1	0	0	0	0.0293521
8315	3223.35	2	0	1	0	0	0	0.0289647
8317	3223.38	2	0	1	0	0	0	0.0299209
8319	3223.42	2	0	1	0	0	0	0.0305437
8321	3223.45	2	0	1	0	0	0	0.0303435
8323	3223.48	2	0	1	0	0	0	0.0300011
8325	3223.52	2	0	1	0	0	0	0.0283618
8327	3223.55	2	0	1	0	0	0	0.0281432
8329	3223.58	2	0	1	0	0	0	0.0289459
8331	3223.62	2	0	1	0	0	0	0.0287074
8333	3223.65	2	0	1	0	0	0	0.0287939
8335	3223.68	2	0	1	0	0	0	0.0290463
8337	3223.72	2	0	1	0	0	0	0.0291387
8339	3223.75	2	0	1	0	0	0	0.0291652
8341	3223.78	2	0	1	0	0	0	0.0294857
8343	3223.82	2	0	1	0	0	0	0.0292346
8345	3223.85	2	0	1	0	0	0	0.0292426
8347	3223.88	2	0	1	0	0	0	0.0294609
8349	3223.92	2	0	1	0	0	0	0.0291042
8351	3223.95	2	0	1	0	0	0	0.0290721
8353	3223.98	2	0	1	0	0	0	0.0300562
8355	3224.02	2	0	1	0	0	0	0.0290083
8357	3224.05	2	0	1	0	0	0	0.0292751
8359	3224.08	2	0	1	0	0	0	0.0298013
8361	3224.11	2	0	1	0	0	0	0.0298344
8363	3224.15	2	0	1	0	0	0	0.0298783
8365	3224.18	2	0	1	0	0	0	0.0304366
8367	3224.21	2	0	1	0	0	0	0.0305876
8369	3224.25	2	0	1	0	0	0	0.0306392
8371	3224.28	2	0	1	0	0	0	0.0305796
8373	3224.31	2	0	1	0	0	0	0.030505
8375	3224.35	2	0	1	0	0	0	0.0302651
8377	3224.38	2	0	1	0	0	0	0.0306856
8379	3224.41	2	0	1	0	0	0	0.0306427
8381	3224.45	2	0	1	0	0	0	0.0300485
8383	3224.48	2	0	1	0	0	0	0.0306591
8385	3224.51	2	0	1	0	0	0	0.0307518
8387	3224.55	2	0	1	0	0	0	0.0310214
8389	3224.58	2	0	1	0	0	0	0.0312313
8391	3224.61	2	0	1	0	0	0	0.0307376
8393	3224.65	2	0	1	0	0	0	0.0306277
8395	3224.68	2	0	1	0	0	0	0.0304303
8397	3224.71	2	0	1	0	0	0	0.0302211
8399	3224.75	2	0	1	0	0	0	0.0296691
8401	3224.78	2	0	1	0	0	0	0.0295028
8403	3224.81	2	0	1	0	0	0	0.0299648
8405	3224.85	2	0	1	0	0	0	0.0299899
8407	3224.88	2	0	1	0	0	0	0.0303355
8409	3224.91	2	0	1	0	0	0	0.0308383
8411	3224.95	2	0	1	0	0	0	0.0304303
8413	3224.98	2	0	1	0	0	0	0.0308899
8415	3225.01	2	0	1	0	0	0	0.0310838
8417	3225.05	2	0	1	0	0	0	0.0314562
8419	3225.08	2	0	1	0	0	0	0.031535
8421	3225.11	2	0	1	0	0	0	0.0307829
8423	3225.15	2	0	1	0	0	0	0.030581
8425	3225.18	2	0	1	0	0	0	0.030075
8427	3225.21	2	0	1	0	0	0	0.029666
8429	3225.25	2	0	1	0	0	0	0.0296534
8431	3225.28	2	0	1	0	0	0	0.0301148
8433	3225.31	2	0	1	0	0	0	0.0298853
8435	3225.35	2	0	1	0	0	0	0.0297765
8437	3225.38	2	0	1	0	0	0	0.0298818
8439	3225.41	2	0	1	0	0	0	0.02975
8441	3225.45	2	0	1	0	0	0	0.0301155
8443	3225.48	2	0	1	0	0	0	0.029902
8445	3225.51	2	0	1	0	0	0	0.0302333
8447	3225.55	2	0	1	0	0	0	0.0297786
8449	3225.58	2	0	1	0	0	0	0.0299885
8451	3225.61	2	0	1	0	0	0	0.0301901
8453	3225.65	2	0	1	0	0	0	0.0303264
8455	3225.68	2	0	1	0	0	0	0.0310329
8457	3225.71	2	0	1	0	0	0	0.031027
8459	3225.75	2	0	1	0	0	0	0.0312522
8461	3225.78	2	0	1	0	0	0	0.0312107
8463	3225.81	2	0	1	0	0	0	0.0312756
8465	3225.85	2	0	1	0	0	0	0.032138
8467	3225.88	2	0	1	0	0	0	0.031981
8469	3225.91	2	0	1	0	0	0	0.0314444
8471	3225.95	2	0	1	0	0	0	0.030884
8473	3225.98	2	0	1	0	0	0	0.0312502
8475	3226.01	2	0	1	0	0	0	0.0304363
8477	3226.05	2	0	1	0	0	0	0.0306103
8479	3226.08	2	0	1	0	0	0	0.0307037
8481	3226.11	2	0	1	0	0	0	0.0300084
8483	3226.15	2	0	1	0	0	0	0.0305914
8485	3226.18	2	0	1	0	0	0	0.0303331
8487	3226.21	2	0	1	0	0	0	0.0301385
8489	3226.25	2	0	1	0	0	0	0.0307166
8491	3226.28	2	0	1	0	0	0	0.0305541
8493	3226.31	2	0	1	0	0	0	0.0304084
8495	3226.35	2	0	1	0	0	0	0.0304178
8497	3226.38	2	0	1	0	0	0	0.0307037
8499	3226.41	2	0	1	0	0	0	0.0306462
8501	3226.45	2	0	1	0	0	0	0.03062
8503	3226.48	2	0	1	0	0	0	0.030831
8505	3226.51	2	0	1	0	0	0	0.0308355
8507	3226.55	2	0	1	0	0	0	0.0310612
8509	3226.58	2	0	1	0	0	0	0.0309053
8511	3226.61	2	0	1	0	0	0	0.030877
8513	3226.65	2	0	1	0	0	0	0.0310849
8515	3226.68	2	0	1	0	0	0	0.030982
8517	3226.71	2	0	1	0	0	0	0.0301573
8519	3226.75	2	0	1	0	0	0	0.030755
8521	3226.78	2	0	1	0	0	0	0.0320511
8523	3226.81	2	0	1	0	0	0	0.032002
8525	3226.85	2	0	1	0	0	0	0.0318688
8527	3226.88	2	0	1	0	0	0	0.0316383
8529	3226.91	2	0	1	0	0	0	0.0317073
8531	3226.95	2	0	1	0	0	0	0.0318168
8533	3226.98	2	0	1	0	0	0	0.031088
8535	3227.01	2	0	1	0	0	0	0.0312488
8537	3227.05	2	0	1	0	0	0	0.0316351
8539	3227.08	2	0	1	0	0	0	0.0317286
8541	3227.11	2	0	1	0	0	0	0.0324096
8543	3227.15	2	0	1	0	0	0	0.032214
8545	3227.18	2	0	1	0	0	0	0.0320222
8547	3227.21	2	0	1	0	0	0	0.030604
8549	3227.25	2	0	1	0	0	0	0.0304729
8551	3227.28	2	0	1	0	0	0	0.0314364
8553	3227.31	2	0	1	0	0	0	0.0315319
8555	3227.35	2	0	1	0	0	0	0.0320072
8557	3227.38	2	0	1	0	0	0	0.0321721
8559	3227.41	2	0	1	0	0	0	0.0326324
8561	3227.45	2	0	1	0	0	0	0.0326502
8563	3227.48	2	0	1	0	0	0	0.0327259
8565	3227.51	2	0	1	0	0	0	0.0324515
8567	3227.55	2	0	1	0	0	0	0.0319971
8569	3227.58	2	0	1	0	0	0	0.0324413
8571	3227.61	2	0	1	0	0	0	0.0321153
8573	3227.65	2	0	1	0	0	0	0.032486
8575	3227.68	2	0	1	0	0	0	0.0322185
8577	3227.71	2	0	1	0	0	0	0.0321038
8579	3227.75	2	0	1	0	0	0	0.0325777
8581	3227.78	2	0	1	0	0	0	0.0317387
8583	3227.81	2	0	1	0	0	0	0.0315818
8585	3227.85	2	0	1	0	0	0	0.0314022
8587	3227.88	2	0	1	0	0	0	0.0303655
8589	3227.91	2	0	1	0	0	0	0.0294278
8591	3227.95	2	0	1	0	0	0	0.0295293
8593	3227.98	2	0	1	0	0	0	0.0290878
8595	3228.01	2	0	1	0	0	0	0.0288493
8597	3228.05	2	0	1	0	0	0	0.0286854
8599	3228.08	2	0	1	0	0	0	0.0287307
8601	3228.11	2	0	1	0	0	0	0.0282572
8603	3228.15	2	0	1	0	0	0	0.0283629
8605	3228.18	2	0	1	0	0	0	0.0292032
8607	3228.21	2	0	1	0	0	0	0.0290794
8609	3228.25	2	0	1	0	0	0	0.0295415
8611	3228.28	2	0	1	0	0	0	0.0294728
8613	3228.31	2	0	1	0	0	0	0.0294508
8615	3228.35	2	0	1	0	0	0	0.0296576
8617	3228.38	2	0	1	0	0	0	0.0293633
8619	3228.41	2	0	1	0	0	0	0.0290393
8621	3228.45	2	0	1	0	0	0	0.0292207
8623	3228.48	2	0	1	0	0	0	0.0294885
8625	3228.51	2	0	1	0	0	0	0.0295788
8627	3228.55	2	0	1	0	0	0	0.029522
8629	3228.58	2	0	1	0	0	0	0.0293106
8631	3228.61	2	0	1	0	0	0	0.0297598
8633	3228.65	2	0	1	0	0	0	0.029311
8635	3228.68	2	0	1	0	0	0	0.0295038
8637	3228.71	2	0	1	0	0	0	0.0300722
8639	3228.75	2	0	1	0	0	0	0.0299941
8641	3228.78	2	0	1	0	0	0	0.0301667
8643	3228.81	2	0	1	0	0	0	0.0302386
8645	3228.85	2	0	1	0	0	0	0.0304439
8647	3228.88	2	0	1	0	0	0	0.030385
8649	3228.91	2	0	1	0	0	0	0.0306633
8651	3228.95	2	0	1	0	0	0	0.0311093
8653	3228.98	2	0	1	0	0	0	0.0307885
8655	3229.01	2	0	1	0	0	0	0.0304931
8657	3229.05	2	0	1	0	0	0	0.030022
8659	3229.08	2	0	1	0	0	0	0.0304746
8661	3229.11	2	0	1	0	0	0	0.029917
8663	3229.15	2	0	1	0	0	0	0.0296817
8665	3229.18	2	0	1	0	0	0	0.03046
8667	3229.21	2	0	1	0	0	0	0.030384
8669	3229.25	2	0	1	0	0	0	0.0304603
8671	3229.28	2	0	1	0	0	0	0.0305227
8673	3229.31	2	0	1	0	0	0	0.0303313
8675	3229.35	2	0	1	0	0	0	0.0305981
8677	3229.38	2	0	1	0	0	0	0.0305887
8679	3229.41	2	0	1	0	0	0	0.0307675
8681	3229.45	2	0	1	0	0	0	0.0309049
8683	3229.48	2	0	1	0	0	0	0.031005
8685	3229.51	2	0	1	0	0	0	0.0313311
8687	3229.55	2	0	1	0	0	0	0.0314256
8689	3229.58	2	0	1	0	0	0	0.0312686
8691	3229.61	2	0	1	0	0	0	0.0310695
8693	3229.65	2	0	1	0	0	0	0.0305576
8695	3229.68	2	0	1	0	0	0	0.0307536
8697	3229.71	2	0	1	0	0	0	0.0308582
8699	3229.75	2	0	1	0	0	0	0.0307177
8701	3229.78	2	0	1	0	0	0	0.0307975
8703	3229.81	2	0	1	0	0	0	0.0305437
8705	3229.85	2	0	1	0	0	0	0.0304886
8707	3229.88	2	0	1	0	0	0	0.0305078
8709	3229.91	2	0	1	0	0	0	0.0303868
8711	3229.95	2	0	1	0	0	0	0.0305782
8713	3229.98	2	0	1	0	0	0	0.0303418
8715	3230.01	2	0	1	0	0	0	0.0304551
8717	3230.05	2	0	1	0	0	0	0.0307442
8719	3230.08	2	0	1	0	0	0	0.0303899
8721	3230.11	2	0	1	0	0	0	0.0303693
8723	3230.15	2	0	1	0	0	0	0.0303603
8725	3230.18	2	0	1	0	0	0	0.0300161
8727	3230.21	2	0	1	0	0	0	0.0303317
8729	3230.25	2	0	1	0	0	0	0.0301078
8731	3230.28	2	0	1	0	0	0	0.0295662
8733	3230.31	2	0	1	0	0	0	0.0292932
8735	3230.35	2	0	1	0	0	0	0.029379
8737	3230.38	2	0	1	0	0	0	0.0294805
8739	3230.41	2	0	1	0	0	0	0.0294069
8741	3230.45	2	0	1	0	0	0	0.0293166
8743	3230.48	2	0	1	0	0	0	0.0294602
8745	3230.51	2	0	1	0	0	0	0.0294034
8747	3230.55	2	0	1	0	0	0	0.0293145
8749	3230.58	2	0	1	0	0	0	0.0293772
8751	3230.61	2	0	1	0	0	0	0.0291771
8753	3230.65	2	0	1	0	0	0	0.0294041
8755	3230.68	2	0	1	0	0	0	0.0291576
8757	3230.71	2	0	1	0	0	0	0.0286718
8759	3230.75	2	0	1	0	0	0	0.0289027
8761	3230.78	2	0	1	0	0	0	0.0288681
8763	3230.81	2	0	1	0	0	0	0.0285421
8765	3230.85	2	0	1	0	0	0	0.029008
8767	3230.88	2	0	1	0	0	0	0.0290889
8769	3230.91	2	0	1	0	0	0	0.0287918
8771	3230.95	2	0	1	0	0	0	0.0288054
8773	3230.98	2	0	1	0	0	0	0.0288866
8775	3231.01	2	0	1	0	0	0	0.0285414
8777	3231.05	2	0	1	0	0	0	0.0291091
8779	3231.08	2	0	1	0	0	0	0.0299484
8781	3231.11	2	0	1	0	0	0	0.0303697
8783	3231.15	2	0	1	0	0	0	0.0301207
8785	3231.18	2	0	1	0	0	0	0.0301315
8787	3231.21	2	0	1	0	0	0	0.0300398
8789	3231.25	2	0	1	0	0	0	0.028744
8791	3231.28	2	0	1	0	0	0	0.0286101
8793	3231.31	2	0	1	0	0	0	0.0285344
8795	3231.35	2	0	1	0	0	0	0.0277854
8797	3231.38	2	0	1	0	0	0	0.0279918
8799	3231.41	2	0	1	0	0	0	0.0287715
8801	3231.45	2	0	1	0	0	0	0.0286666
8803	3231.48	2	0	1	0	0	0	0.0284131
8805	3231.51	2	0	1	0	0	0	0.028895
8807	3231.55	2	0	1	0	0	0	0.0288256
8809	3231.58	2	0	1	0	0	0	0.0287475
8811	3231.61	2	0	1	0	0	0	0.0298501
8813	3231.65	2	0	1	0	0	0	0.0294955
8815	3231.68	2	0	1	0	0	0	0.0294431
8817	3231.71	2	0	1	0	0	0	0.0302682
8819	3231.75	2	0	1	0	0	0	0.0297437
8821	3231.78	2	0	1	0	0	0	0.0298752
8823	3231.81	2	0	1	0	0	0	0.0305259
8825	3231.85	2	0	1	0	0	0	0.0294644
8827	3231.88	2	0	1	0	0	0	0.0300035
8829	3231.91	2	0	1	0	0	0	0.0300761
8831	3231.95	2	0	1	0	0	0	0.0296531
8833	3231.98	2	0	1	0	0	0	0.030166
8835	3232.01	2	0	1	0	0	0	0.029538
8837	3232.05	2	0	1	0	0	0	0.0292684
8839	3232.08	2	0	1	0	0	0	0.0294763
8841	3232.11	2	0	1	0	0	0	0.0292524
8843	3232.15	2	0	1	0	0	0	0.029259
8845	3232.18	2	0	1	0	0	0	0.0294798
8847	3232.21	2	0	1	0	0	0	0.0301043
8849	3232.25	2	0	1	0	0	0	0.0305018
8851	3232.28	2	0	1	0	0	0	0.0305315
8853	3232.31	2	0	1	0	0	0	0.0301228
8855	3232.35	2	0	1	0	0	0	0.0292196
8857	3232.38	2	0	1	0	0	0	0.0297005
8859	3232.41	2	0	1	0	0	0	0.0290578
8861	3232.45	2	0	1	0	0	0	0.028654
8863	3232.48	2	0	1	0	0	0	0.0290923
8865	3232.51	2	0	1	0	0	0	0.0300757
8867	3232.55	2	0	1	0	0	0	0.0306908
8869	3232.58	2	0	1	0	0	0	0.0304561
8871	3232.61	2	0	1	0	0	0	0.0311462
8873	3232.65	2	0	1	0	0	0	0.0317715
8875	3232.68	2	0	1	0	0	0	0.0320602
8877	3232.71	2	0	1	0	0	0	0.0318095
8879	3232.75	2	0	1	0	0	0	0.0318552
8881	3232.78	2	0	1	0	0	0	0.0319647
8883	3232.81	2	0	1	0	0	0	0.0315152
8885	3232.85	2	0	1	0	0	0	0.0312421
8887	3232.88	2	0	1	0	0	0	0.0308387
8889	3232.91	2	0	1	0	0	0	0.0308973
8891	3232.95	2	0	1	0	0	0	0.0310978
8893	3232.98	2	0	1	0	0	0	0.0308279
8895	3233.01	2	0	1	0	0	0	0.0306887
8897	3233.05	2	0	1	0	0	0	0.0311501
8899	3233.08	2	0	1	0	0	0	0.0308763
8901	3233.11	2	0	1	0	0	0	0.0311002
8903	3233.15	2	0	1	0	0	0	0.0309844
8905	3233.18	2	0	1	0	0	0	0.031367
8907	3233.21	2	0	1	0	0	0	0.0314353
8909	3233.25	2	0	1	0	0	0	0.03155
8911	3233.28	2	0	1	0	0	0	0.0317889
8913	3233.31	2	0	1	0	0	0	0.031656
8915	3233.35	2	0	1	0	0	0	0.0317568
8917	3233.38	2	0	1	0	0	0	0.0315692
8919	3233.41	2	0	1	0	0	0	0.0315096
8921	3233.45	2	0	1	0	0	0	0.0314015
8923	3233.48	2	0	1	0	0	0	0.0313122
8925	3233.51	2	0	1	0	0	0	0.0313429
8927	3233.55	2	0	1	0	0	0	0.0312658
8929	3233.58	2	0	1	0	0	0	0.0313223
8931	3233.61	2	0	1	0	0	0	0.0312658
8933	3233.65	2	0	1	0	0	0	0.0313764
8935	3233.68	2	0	1	0	0	0	0.0314214
8937	3233.71	2	0	1	0	0	0	0.0316839
8939	3233.75	2	0	1	0	0	0	0.03114
8941	3233.78	2	0	1	0	0	0	0.0309307
8943	3233.81	2	0	1	0	0	0	0.0309346
8945	3233.85	2	0	1	0	0	0	0.0315417
8947	3233.88	2	0	1	0	0	0	0.0311794
8949	3233.91	2	0	1	0	0	0	0.0308314
8951	3233.95	2	0	1	0	0	0	0.0304094
8953	3233.98	2	0	1	0	0	0	0.030263
8955	3234.01	2	0	1	0	0	0	0.030603
8957	3234.05	2	0	1	0	0	0	0.0313624
8959	3234.08	2	0	1	0	0	0	0.0316505
8961	3234.11	2	0	1	0	0	0	0.0314113
8963	3234.15	2	0	1	0	0	0	0.0310409
8965	3234.18	2	0	1	0	0	0	0.0311679
8967	3234.21	2	0	1	0	0	0	0.0305276
8969	3234.25	2	0	1	0	0	0	0.0305451
8971	3234.28	2	0	1	0	0	0	0.0305635
8973	3234.31	2	0	1	0	0	0	0.0305904
8975	3234.35	2	0	1	0	0	0	0.0309482
8977	3234.38	2	0	1	0	0	0	0.0309272
8979	3234.41	2	0	1	0	0	0	0.0307379
8981	3234.45	2	0	1	0	0	0	0.0308547
8983	3234.48	2	0	1	0	0	0	0.0305751
8985	3234.51	2	0	1	0	0	0	0.0305928
8987	3234.55	2	0	1	0	0	0	0.0304049
8989	3234.58	2	0	1	0	0	0	0.0300774
8991	3234.61	2	0	1	0	0	0	0.0301685
8993	3234.65	2	0	1	0	0	0	0.03009
8995	3234.68	2	0	1	0	0	0	0.0301754
8997	3234.71	2	0	1	0	0	0	0.0303892
8999	3234.75	2	0	1	0	0	0	0.0294456
9001	3234.78	2	0	1	0	0	0	0.029523
9003	3234.81	2	0	1	0	0	0	0.0298599
9005	3234.85	2	0	1	0	0	0	0.0305764
9007	3234.88	2	0	1	0	0	0	0.0307759
9009	3234.91	2	0	1	0	0	0	0.030658
9011	3234.95	2	0	1	0	0	0	0.030906
9013	3234.98	2	0	1	0	0	0	0.0307881
9015	3235.01	2	0	1	0	0	0	0.0301001
9017	3235.05	2	0	1	0	0	0	0.0291154
9019	3235.08	2	0	1	0	0	0	0.027965
9021	3235.11	2	0	1	0	0	0	0.0271936
9023	3235.15	2	0	1	0	0	0	0.0270674
9025	3235.18	2	0	1	0	0	0	0.0269474
9027	3235.21	2	0	1	0	0	0	0.0270304
9029	3235.25	2	0	1	0	0	0	0.0273307
9031	3235.28	2	0	1	0	0	0	0.0278356
9033	3235.31	2	0	1	0	0	0	0.0281048
9035	3235.35	2	0	1	0	0	0	0.0284221
9037	3235.38	2	0	1	0	0	0	0.0283684
9039	3235.41	2	0	1	0	0	0	0.0282052
9041	3235.45	2	0	1	0	0	0	0.0284915
9043	3235.48	2	0	1	0	0	0	0.0285808
9045	3235.51	2	0	1	0	0	0	0.0290951
9047	3235.55	2	0	1	0	0	0	0.0298616
9049	3235.58	2	0	1	0	0	0	0.030475
9051	3235.61	2	0	1	0	0	0	0.0300687
9053	3235.65	2	0	1	0	0	0	0.0297183
9055	3235.68	2	0	1	0	0	0	0.0291889
9057	3235.71	2	0	1	0	0	0	0.0292716
9059	3235.75	2	0	1	0	0	0	0.0296614
9061	3235.78	2	0	1	0	0	0	0.0295042
9063	3235.81	2	0	1	0	0	0	0.0292667
9065	3235.85	2	0	1	0	0	0	0.0290805
9067	3235.88	2	0	1	0	0	0	0.0291004
9069	3235.91	2	0	1	0	0	0	0.0291603
9071	3235.95	2	0	1	0	0	0	0.0290153
9073	3235.98	2	0	1	0	0	0	0.0290686
9075	3236.01	2	0	1	0	0	0	0.0289281
9077	3236.05	2	0	1	0	0	0	0.0287039
9079	3236.08	2	0	1	0	0	0	0.0281749
9081	3236.11	2	0	1	0	0	0	0.0284267
9083	3236.15	2	0	1	0	0	0	0.0288584
9085	3236.18	2	0	1	0	0	0	0.0287977
9087	3236.21	2	0	1	0	0	0	0.0286369
9089	3236.25	2	0	1	0	0	0	0.0288612
9091	3236.28	2	0	1	0	0	0	0.0284664
9093	3236.31	2	0	1	0	0	0	0.0283405
9095	3236.35	2	0	1	0	0	0	0.028888
9097	3236.38	2	0	1	0	0	0	0.0287405
9099	3236.41	2	0	1	0	0	0	0.0285477
9101	3236.45	2	0	1	0	0	0	0.0290801
9103	3236.48	2	0	1	0	0	0	0.0289452
9105	3236.51	2	0	1	0	0	0	0.0289037
9107	3236.55	2	0	1	0	0	0	0.0291865
9109	3236.58	2	0	1	0	0	0	0.028601
9111	3236.61	2	0	1	0	0	0	0.0280658
9113	3236.65	2	0	1	0	0	0	0.0285811
9115	3236.68	2	0	1	0	0	0	0.0296269
9117	3236.71	2	0	1	0	0	0	0.0306716
9119	3236.75	2	0	1	0	0	0	0.031027
9121	3236.78	2	0	1	0	0	0	0.0305981
9123	3236.81	2	0	1	0	0	0	0.0302703
9125	3236.85	2	0	1	0	0	0	0.0305179
9127	3236.88	2	0	1	0	0	0	0.0299352
9129	3236.91	2	0	1	0	0	0	0.0294885
9131	3236.95	2	0	1	0	0	0	0.0297681
9133	3236.98	2	0	1	0	0	0	0.0295955
9135	3237.01	2	0	1	0	0	0	0.0298581
9137	3237.05	2	0	1	0	0	0	0.0309408
9139	3237.08	2	0	1	0	0	0	0.0313077
9141	3237.11	2	0	1	0	0	0	0.0315748
9143	3237.15	2	0	1	0	0	0	0.0313377
9145	3237.18	2	0	1	0	0	0	0.0313607
9147	3237.21	2	0	1	0	0	0	0.0311229
9149	3237.25	2	0	1	0	0	0	0.0310744
9151	3237.28	2	0	1	0	0	0	0.0310674
9153	3237.31	2	0	1	0	0	0	0.0307588
9155	3237.35	2	0	1	0	0	0	0.0307944
9157	3237.38	2	0	1	0	0	0	0.030823
9159	3237.41	2	0	1	0	0	0	0.0306507
9161	3237.45	2	0	1	0	0	0	0.0307386
9163	3237.48	2	0	1	0	0	0	0.0306664
9165	3237.51	2	0	1	0	0	0	0.0306437
9167	3237.55	2	0	1	0	0	0	0.0315187
9169	3237.58	2	0	1	0	0	0	0.031201
9171	3237.61	2	0	1	0	0	0	0.0311267
9173	3237.65	2	0	1	0	0	0	0.0313795
9175	3237.68	2	0	1	0	0	0	0.0307212
9177	3237.71	2	0	1	0	0	0	0.0305768
9179	3237.75	2	0	1	0	0	0	0.0299268
9181	3237.78	2	0	1	0	0	0	0.0302863
9183	3237.81	2	0	1	0	0	0	0.0314566
9185	3237.85	2	0	1	0	0	0	0.0311142
9187	3237.88	2	0	1	0	0	0	0.0308062
9189	3237.91	2	0	1	0	0	0	0.0313251
9191	3237.95	2	0	1	0	0	0	0.0314479
9193	3237.98	2	0	1	0	0	0	0.0312638
9195	3238.01	2	0	1	0	0	0	0.0309883
9197	3238.05	2	0	1	0	0	0	0.0309848
9199	3238.08	2	0	1	0	0	0	0.0308314
9201	3238.11	2	0	1	0	0	0	0.0320881
9203	3238.15	2	0	1	0	0	0	0.0327419
9205	3238.18	2	0	1	0	0	0	0.0319075
9207	3238.21	2	0	1	0	0	0	0.0319514
9209	3238.25	2	0	1	0	0	0	0.0309551
9211	3238.28	2	0	1	0	0	0	0.03015
9213	3238.31	2	0	1	0	0	0	0.0303038
9215	3238.35	2	0	1	0	0	0	0.0308226
9217	3238.38	2	0	1	0	0	0	0.0307212
9219	3238.41	2	0	1	0	0	0	0.0305517
9221	3238.45	2	0	1	0	0	0	0.0306451
9223	3238.48	2	0	1	0	0	0	0.030945
9225	3238.51	2	0	1	0	0	0	0.0313311
9227	3238.55	2	0	1	0	0	0	0.031225
9229	3238.58	2	0	1	0	0	0	0.0316505
9231	3238.61	2	0	1	0	0	0	0.031678
9233	3238.65	2	0	1	0	0	0	0.0319333
9235	3238.68	2	0	1	0	0	0	0.0314936
9237	3238.71	2	0	1	0	0	0	0.0311612
9239	3238.75	2	0	1	0	0	0	0.0301441
9241	3238.78	2	0	1	0	0	0	0.0291924
9243	3238.81	2	0	1	0	0	0	0.0305255
9245	3238.85	2	0	1	0	0	0	0.0305304
9247	3238.88	2	0	1	0	0	0	0.0300604
9249	3238.91	2	0	1	0	0	0	0.0301528
9251	3238.95	2	0	1	0	0	0	0.0306636
9253	3238.98	2	0	1	0	0	0	0.0307323
9255	3239.01	2	0	1	0	0	0	0.0306818
9257	3239.05	2	0	1	0	0	0	0.0303435
9259	3239.08	2	0	1	0	0	0	0.0305391
9261	3239.11	2	0	1	0	0	0	0.0307138
9263	3239.15	2	0	1	0	0	0	0.0308941
9265	3239.18	2	0	1	0	0	0	0.0313251
9267	3239.21	2	0	1	0	0	0	0.0303254
9269	3239.25	2	0	1	0	0	0	0.0300244
9271	3239.28	2	0	1	0	0	0	0.0308729
9273	3239.31	2	0	1	0	0	0	0.0314723
9275	3239.35	2	0	1	0	0	0	0.0311891
9277	3239.38	2	0	1	0	0	0	0.0306099
9279	3239.41	2	0	1	0	0	0	0.0303644
9281	3239.45	2	0	1	0	0	0	0.02922
9283	3239.48	2	0	1	0	0	0	0.0298895
9285	3239.51	2	0	1	0	0	0	0.0305053
9287	3239.55	2	0	1	0	0	0	0.0303334
9289	3239.58	2	0	1	0	0	0	0.0296419
9291	3239.61	2	0	1	0	0	0	0.029917
9293	3239.65	2	0	1	0	0	0	0.0300217
9295	3239.68	2	0	1	0	0	0	0.0298916
9297	3239.71	2	0	1	0	0	0	0.0301514
9299	3239.75	2	0	1	0	0	0	0.029939
9301	3239.78	2	0	1	0	0	0	0.0297852
9303	3239.81	2	0	1	0	0	0	0.0305698
9305	3239.85	2	0	1	0	0	0	0.030113
9307	3239.88	2	0	1	0	0	0	0.029772
9309	3239.91	2	0	1	0	0	0	0.0296074
9311	3239.95	2	0	1	0	0	0	0.0298623
9313	3239.98	2	0	1	0	0	0	0.0294881
9315	3240.01	2	0	1	0	0	0	0.029515
9317	3240.05	2	0	1	0	0	0	0.0297817
9319	3240.08	2	0	1	0	0	0	0.0304084
9321	3240.11	2	0	1	0	0	0	0.0306382
9323	3240.15	2	0	1	0	0	0	0.0296444
9325	3240.18	2	0	1	0	0	0	0.029764
9327	3240.21	2	0	1	0	0	0	0.0300269
9329	3240.25	2	0	1	0	0	0	0.030792
9331	3240.28	2	0	1	0	0	0	0.0306451
9333	3240.31	2	0	1	0	0	0	0.0300963
9335	3240.35	2	0	1	0	0	0	0.0295101
9337	3240.38	2	0	1	0	0	0	0.0286544
9339	3240.41	2	0	1	0	0	0	0.0291715
9341	3240.45	2	0	1	0	0	0	0.0295418
9343	3240.48	2	0	1	0	0	0	0.029651
9345	3240.51	2	0	1	0	0	0	0.0289187
9347	3240.55	2	0	1	0	0	0	0.0291579
9349	3240.58	2	0	1	0	0	0	0.0293176
9351	3240.61	2	0	1	0	0	0	0.0288179
9353	3240.65	2	0	1	0	0	0	0.0290781
9355	3240.68	2	0	1	0	0	0	0.0288566
9357	3240.71	2	0	1	0	0	0	0.0287415
9359	3240.75	2	0	1	0	0	0	0.0290781
9361	3240.78	2	0	1	0	0	0	0.0285756
9363	3240.81	2	0	1	0	0	0	0.0281303
9365	3240.85	2	0	1	0	0	0	0.0277774
9367	3240.88	2	0	1	0	0	0	0.0288758
9369	3240.91	2	0	1	0	0	0	0.0294721
9371	3240.95	2	0	1	0	0	0	0.0286209
9373	3240.98	2	0	1	0	0	0	0.0290805
9375	3241.01	2	0	1	0	0	0	0.0282746
9377	3241.05	2	0	1	0	0	0	0.0284486
9379	3241.08	2	0	1	0	0	0	0.0281805
9381	3241.11	2	0	1	0	0	0	0.028722
9383	3241.15	2	0	1	0	0	0	0.0289923
9385	3241.18	2	0	1	0	0	0	0.0291963
9387	3241.21	2	0	1	0	0	0	0.0294595
9389	3241.25	2	0	1	0	0	0	0.029349
9391	3241.28	2	0	1	0	0	0	0.0299805
9393	3241.31	2	0	1	0	0	0	0.0298006
9395	3241.35	2	0	1	0	0	0	0.0285846
9397	3241.38	2	0	1	0	0	0	0.029145
9399	3241.41	2	0	1	0	0	0	0.0296147
9401	3241.45	2	0	1	0	0	0	0.0289382
9403	3241.48	2	0	1	0	0	0	0.0289236
9405	3241.51	2	0	1	0	0	0	0.0286125
9407	3241.55	2	0	1	0	0	0	0.0279831
9409	3241.58	2	0	1	0	0	0	0.0276905
9411	3241.61	2	0	1	0	0	0	0.0282718
9413	3241.65	2	0	1	0	0	0	0.0283046
9415	3241.68	2	0	1	0	0	0	0.0285661
9417	3241.71	2	0	1	0	0	0	0.0292064
9419	3241.75	2	0	1	0	0	0	0.0287384
9421	3241.78	2	0	1	0	0	0	0.0286164
9423	3241.81	2	0	1	0	0	0	0.0287004
9425	3241.85	2	0	1	0	0	0	0.0282711
9427	3241.88	2	0	1	0	0	0	0.0282924
9429	3241.91	2	0	1	0	0	0	0.0286816
9431	3241.95	2	0	1	0	0	0	0.0291966
9433	3241.98	2	0	1	0	0	0	0.0295781
9435	3242.01	2	0	1	0	0	0	0.0287712
9437	3242.05	2	0	1	0	0	0	0.0297915
9439	3242.08	2	0	1	0	0	0	0.0300499
9441	3242.11	2	0	1	0	0	0	0.0313377
9443	3242.15	2	0	1	0	0	0	0.0307773
9445	3242.18	2	0	1	0	0	0	0.0306301
9447	3242.21	2	0	1	0	0	0	0.0319821
9449	3242.25	2	0	1	0	0	0	0.0304917
9451	3242.28	2	0	1	0	0	0	0.0310782
9453	3242.31	2	0	1	0	0	0	0.0317206
9455	3242.35	2	0	1	0	0	0	0.0304209
9457	3242.38	2	0	1	0	0	0	0.0313007
9459	3242.41	2	0	1	0	0	0	0.0308432
9461	3242.45	2	0	1	0	0	0	0.0302542
9463	3242.48	2	0	1	0	0	0	0.0306371
9465	3242.51	2	0	1	0	0	0	0.0307888
9467	3242.55	2	0	1	0	0	0	0.0303892
9469	3242.58	2	0	1	0	0	0	0.0299265
9471	3242.61	2	0	1	0	0	0	0.0296154
9473	3242.65	2	0	1	0	0	0	0.0299014
9475	3242.68	2	0	1	0	0	0	0.0295645
9477	3242.71	2	0	1	0	0	0	0.0291722
9479	3242.75	2	0	1	0	0	0	0.0296405
9481	3242.78	2	0	1	0	0	0	0.0301835
9483	3242.81	2	0	1	0	0	0	0.0299094
9485	3242.85	2	0	1	0	0	0	0.0292977
9487	3242.88	2	0	1	0	0	0	0.0294003
9489	3242.91	2	0	1	0	0	0	0.0300475
9491	3242.95	2	0	1	0	0	0	0.0299523
9493	3242.98	2	0	1	0	0	0	0.0298327
9495	3243.01	2	0	1	0	0	0	0.0296464
9497	3243.05	2	0	1	0	0	0	0.0292182
9499	3243.08	2	0	1	0	0	0	0.0296227
9501	3243.11	2	0	1	0	0	0	0.0302302
9503	3243.15	2	0	1	0	0	0	0.030603
9505	3243.18	2	0	1	0	0	0	0.0302417
9507	3243.21	2	0	1	0	0	0	0.0298679
9509	3243.25	2	0	1	0	0	0	0.0296175
9511	3243.28	2	0	1	0	0	0	0.0290425
9513	3243.31	2	0	1	0	0	0	0.0293755
9515	3243.35	2	0	1	0	0	0	0.0298156
9517	3243.38	2	0	1	0	0	0	0.0293448
9519	3243.41	2	0	1	0	0	0	0.0296524
9521	3243.45	2	0	1	0	0	0	0.0303013
9523	3243.48	2	0	1	0	0	0	0.029856
9525	3243.51	2	0	1	0	0	0	0.030105
9527	3243.55	2	0	1	0	0	0	0.0299439
9529	3243.58	2	0	1	0	0	0	0.0294627
9531	3243.61	2	0	1	0	0	0	0.0294857
9533	3243.65	2	0	1	0	0	0	0.0302372
9535	3243.68	2	0	1	0	0	0	0.0295436
9537	3243.71	2	0	1	0	0	0	0.0299725
9539	3243.75	2	0	1	0	0	0	0.0296349
9541	3243.78	2	0	1	0	0	0	0.0302012
9543	3243.81	2	0	1	0	0	0	0.029894
9545	3243.85	2	0	1	0	0	0	0.0302671
9547	3243.88	2	0	1	0	0	0	0.0299481
9549	3243.91	2	0	1	0	0	0	0.0295628
9551	3243.95	2	0	1	0	0	0	0.0293019
9553	3243.98	2	0	1	0	0	0	0.0303571
9555	3244.01	2	0	1	0	0	0	0.0303958
9557	3244.05	2	0	1	0	0	0	0.0298428
9559	3244.08	2	0	1	0	0	0	0.029455
9561	3244.11	2	0	1	0	0	0	0.0294201
9563	3244.15	2	0	1	0	0	0	0.0301535
9565	3244.18	2	0	1	0	0	0	0.0304844
9567	3244.21	2	0	1	0	0	0	0.0303393
9569	3244.25	2	0	1	0	0	0	0.0299509
9571	3244.28	2	0	1	0	0	0	0.0302309
9573	3244.31	2	0	1	0	0	0	0.0301611
9575	3244.35	2	0	1	0	0	0	0.0309541
9577	3244.38	2	0	1	0	0	0	0.0304345
9579	3244.41	2	0	1	0	0	0	0.0300541
9581	3244.45	2	0	1	0	0	0	0.0302891
9583	3244.48	2	0	1	0	0	0	0.029832
9585	3244.51	2	0	1	0	0	0	0.0300827
9587	3244.55	2	0	1	0	0	0	0.0301388
9589	3244.58	2	0	1	0	0	0	0.0297849
9591	3244.61	2	0	1	0	0	0	0.0292758
9593	3244.65	2	0	1	0	0	0	0.0299589
9595	3244.68	2	0	1	0	0	0	0.0301625
9597	3244.71	2	0	1	0	0	0	0.0305224
9599	3244.75	2	0	1	0	0	0	0.0301294
9601	3244.78	2	0	1	0	0	0	0.0300447
9603	3244.81	2	0	1	0	0	0	0.0294309
9605	3244.85	2	0	1	0	0	0	0.0287715
9607	3244.88	2	0	1	0	0	0	0.0290296
9609	3244.91	2	0	1	0	0	0	0.0291802
9611	3244.95	2	0	1	0	0	0	0.0282164
9613	3244.98	2	0	1	0	0	0	0.0285505
9615	3245.01	2	0	1	0	0	0	0.0299174
9617	3245.05	2	0	1	0	0	0	0.0295485
9619	3245.08	2	0	1	0	0	0	0.0307396
9621	3245.11	2	0	1	0	0	0	0.0303229
9623	3245.15	2	0	1	0	0	0	0.0291544
9625	3245.18	2	0	1	0	0	0	0.0299697
9627	3245.21	2	0	1	0	0	0	0.0298222
9629	3245.25	2	0	1	0	0	0	0.0297849
9631	3245.28	2	0	1	0	0	0	0.0303404
9633	3245.31	2	0	1	0	0	0	0.0307546
9635	3245.35	2	0	1	0	0	0	0.0301134
9637	3245.38	2	0	1	0	0	0	0.0296576
9639	3245.41	2	0	1	0	0	0	0.0298689
9641	3245.45	2	0	1	0	0	0	0.0305956
9643	3245.48	2	0	1	0	0	0	0.0298996
9645	3245.51	2	0	1	0	0	0	0.0294365
9647	3245.55	2	0	1	0	0	0	0.0290599
9649	3245.58	2	0	1	0	0	0	0.0298686
9651	3245.61	2	0	1	0	0	0	0.0300154
9653	3245.65	2	0	1	0	0	0	0.029379
9655	3245.68	2	0	1	0	0	0	0.0295788
9657	3245.71	2	0	1	0	0	0	0.0292779
9659	3245.75	2	0	1	0	0	0	0.0292217
9661	3245.78	2	0	1	0	0	0	0.0293023
9663	3245.81	2	0	1	0	0	0	0.0290515
9665	3245.85	2	0	1	0	0	0	0.0292548
9667	3245.88	2	0	1	0	0	0	0.0295352
9669	3245.91	2	0	1	0	0	0	0.030558
9671	3245.95	2	0	1	0	0	0	0.030438
9673	3245.98	2	0	1	0	0	0	0.0302828
9675	3246.01	2	0	1	0	0	0	0.0298825
9677	3246.05	2	0	1	0	0	0	0.0293016
9679	3246.08	2	0	1	0	0	0	0.0295038
9681	3246.11	2	0	1	0	0	0	0.0283918
9683	3246.15	2	0	1	0	0	0	0.0281344
9685	3246.18	2	0	1	0	0	0	0.0287391
9687	3246.21	2	0	1	0	0	0	0.02817
9689	3246.25	2	0	1	0	0	0	0.0287492
9691	3246.28	2	0	1	0	0	0	0.0304579
9693	3246.31	2	0	1	0	0	0	0.0301639
9695	3246.35	2	0	1	0	0	0	0.0305817
9697	3246.38	2	0	1	0	0	0	0.030097
9699	3246.41	2	0	1	0	0	0	0.0299924
9701	3246.45	2	0	1	0	0	0	0.0301475
9703	3246.48	2	0	1	0	0	0	0.0300917
9705	3246.51	2	0	1	0	0	0	0.0301109
9707	3246.55	2	0	1	0	0	0	0.0297891
9709	3246.58	2	0	1	0	0	0	0.0295436
9711	3246.61	2	0	1	0	0	0	0.0294927
9713	3246.65	2	0	1	0	0	0	0.0298302
9715	3246.68	2	0	1	0	0	0	0.0295338
9717	3246.71	2	0	1	0	0	0	0.0293936
9719	3246.75	2	0	1	0	0	0	0.0295798
9721	3246.78	2	0	1	0	0	0	0.0300203
9723	3246.81	2	0	1	0	0	0	0.0303948
9725	3246.85	2	0	1	0	0	0	0.0301894
9727	3246.88	2	0	1	0	0	0	0.029977
9729	3246.91	2	0	1	0	0	0	0.030014
9731	3246.95	2	0	1	0	0	0	0.03015
9733	3246.98	2	0	1	0	0	0	0.0309339
9735	3247.01	2	0	1	0	0	0	0.0304133
9737	3247.05	2	0	1	0	0	0	0.0298801
9739	3247.08	2	0	1	0	0	0	0.0297137
9741	3247.11	2	0	1	0	0	0	0.0298895
9743	3247.15	2	0	1	0	0	0	0.0308858
9745	3247.18	2	0	1	0	0	0	0.0305855
9747	3247.21	2	0	1	0	0	0	0.0294728
9749	3247.25	2	0	1	0	0	0	0.0295865
9751	3247.28	2	0	1	0	0	0	0.0297043
9753	3247.31	2	0	1	0	0	0	0.0305754
9755	3247.35	2	0	1	0	0	0	0.0301699
9757	3247.38	2	0	1	0	0	0	0.0297695
9759	3247.41	2	0	1	0	0	0	0.0294344
9761	3247.45	2	0	1	0	0	0	0.0292901
9763	3247.48	2	0	1	0	0	0	0.0297978
9765	3247.51	2	0	1	0	0	0	0.0296761
9767	3247.55	2	0	1	0	0	0	0.0290585
9769	3247.58	2	0	1	0	0	0	0.0291471
9771	3247.61	2	0	1	0	0	0	0.0289961
9773	3247.65	2	0	1	0	0	0	0.0293511
9775	3247.68	2	0	1	0	0	0	0.029598
9777	3247.71	2	0	1	0	0	0	0.0295558
9779	3247.75	2	0	1	0	0	0	0.0296252
9781	3247.78	2	0	1	0	0	0	0.0291841
9783	3247.81	2	0	1	0	0	0	0.029637
9785	3247.85	2	0	1	0	0	0	0.0293636
9787	3247.88	2	0	1	0	0	0	0.0293929
9789	3247.91	2	0	1	0	0	0	0.0290156
9791	3247.95	2	0	1	0	0	0	0.0286247
9793	3247.98	2	0	1	0	0	0	0.0286062
9795	3248.01	2	0	1	0	0	0	0.0292196
9797	3248.05	2	0	1	0	0	0	0.0298508
9799	3248.08	2	0	1	0	0	0	0.0294104
9801	3248.11	2	0	1	0	0	0	0.0291774
9803	3248.15	2	0	1	0	0	0	0.0290679
9805	3248.18	2	0	1	0	0	0	0.0289905
9807	3248.21	2	0	1	0	0	0	0.029493
9809	3248.25	2	0	1	0	0	0	0.028986
9811	3248.28	2	0	1	0	0	0	0.0285295
9813	3248.31	2	0	1	0	0	0	0.0288462
9815	3248.35	2	0	1	0	0	0	0.0286045
9817	3248.38	2	0	1	0	0	0	0.029259
9819	3248.41	2	0	1	0	0	0	0.0290728
9821	3248.45	2	0	1	0	0	0	0.0282924
9823	3248.48	2	0	1	0	0	0	0.0284375
9825	3248.51	2	0	1	0	0	0	0.0288176
9827	3248.55	2	0	1	0	0	0	0.0287593
9829	3248.58	2	0	1	0	0	0	0.0292953
9831	3248.61	2	0	1	0	0	0	0.0289473
9833	3248.65	2	0	1	0	0	0	0.0284469
9835	3248.68	2	0	1	0	0	0	0.0286631
9837	3248.71	2	0	1	0	0	0	0.0286634
9839	3248.75	2	0	1	0	0	0	0.0287001
9841	3248.78	2	0	1	0	0	0	0.0291792
9843	3248.81	2	0	1	0	0	0	0.028851
9845	3248.85	2	0	1	0	0	0	0.0283901
9847	3248.88	2	0	1	0	0	0	0.0290453
9849	3248.91	2	0	1	0	0	0	0.0287279
9851	3248.95	2	0	1	0	0	0	0.0291035
9853	3248.98	2	0	1	0	0	0	0.0290585
9855	3249.01	2	0	1	0	0	0	0.0288378
9857	3249.05	2	0	1	0	0	0	0.0285519
9859	3249.08	2	0	1	0	0	0	0.0290756
9861	3249.11	2	0	1	0	0	0	0.0293745
9863	3249.15	2	0	1	0	0	0	0.0293825
9865	3249.18	2	0	1	0	0	0	0.0300534
9867	3249.21	2	0	1	0	0	0	0.0292967
9869	3249.25	2	0	1	0	0	0	0.0288908
9871	3249.28	2	0	1	0	0	0	0.0290076
9873	3249.31	2	0	1	0	0	0	0.0288266
9875	3249.35	2	0	1	0	0	0	0.0292782
9877	3249.38	2	0	1	0	0	0	0.0291938
9879	3249.41	2	0	1	0	0	0	0.0287984
9881	3249.45	2	0	1	0	0	0	0.0288957
9883	3249.48	2	0	1	0	0	0	0.0294048
9885	3249.51	2	0	1	0	0	0	0.0289985
9887	3249.55	2	0	1	0	0	0	0.029144
9889	3249.58	2	0	1	0	0	0	0.0296485
9891	3249.61	2	0	1	0	0	0	0.0292911
9893	3249.65	2	0	1	0	0	0	0.0288999
9895	3249.68	2	0	1	0	0	0	0.0286634
9897	3249.71	2	0	1	0	0	0	0.0287422
9899	3249.75	2	0	1	0	0	0	0.0284413
9901	3249.78	2	0	1	0	0	0	0.0279681
9903	3249.81	2	0	1	0	0	0	0.0278328
9905	3249.85	2	0	1	0	0	0	0.0271968
9907	3249.88	2	0	1	0	0	0	0.0271274
9909	3249.91	2	0	1	0	0	0	0.0270629
9911	3249.95	2	0	1	0	0	0	0.026627
9913	3249.98	2	0	1	0	0	0	0.027519
9915	3250.01	2	0	1	0	0	0	0.0272721
9917	3250.05	2	0	1	0	0	0	0.0264157
9919	3250.08	2	0	1	0	0	0	0.0267166
9921	3250.11	2	0	1	0	0	0	0.0265203
9923	3250.15	2	0	1	0	0	0	0.0259278
9925	3250.18	2	0	1	0	0	0	0.0262574
9927	3250.21	2	0	1	0	0	0	0.0268718
9929	3250.25	2	0	1	0	0	0	0.0269415
9931	3250.28	2	0	1	0	0	0	0.0269206
9933	3250.31	2	0	1	0	0	0	0.027187
9935	3250.35	2	0	1	0	0	0	0.0264369
9937	3250.38	2	0	1	0	0	0	0.0262214
9939	3250.41	2	0	1	0	0	0	0.0266082
9941	3250.45	2	0	1	0	0	0	0.0257967
9943	3250.48	2	0	1	0	0	0	0.0258114
9945	3250.51	2	0	1	0	0	0	0.0263494
9947	3250.55	2	0	1	0	0	0	0.0265691
9949	3250.58	2	0	1	0	0	0	0.0267849
9951	3250.61	2	0	1	0	0	0	0.0272435
9953	3250.65	2	0	1	0	0	0	0.0274266
9955	3250.68	2	0	1	0	0	0	0.0269889
9957	3250.71	2	0	1	0	0	0	0.0268746
9959	3250.75	2	0	1	0	0	0	0.0271085
9961	3250.78	2	0	1	0	0	0	0.0269823
9963	3250.81	2	0	1	0	0	0	0.0264753
9965	3250.85	2	0	1	0	0	0	0.0266828
9967	3250.88	2	0	1	0	0	0	0.0266863
9969	3250.91	2	0	1	0	0	0	0.0260945
9971	3250.95	2	0	1	0	0	0	0.0263079
9973	3250.98	2	0	1	0	0	0	0.026651
9975	3251.01	2	0	1	0	0	0	0.0260004
9977	3251.05	2	0	1	0	0	0	0.0260969
9979	3251.08	2	0	1	0	0	0	0.026415
9981	3251.11	2	0	1	0	0	0	0.0266636
9983	3251.15	2	0	1	0	0	0	0.026952
9985	3251.18	2	0	1	0	0	0	0.0272069
9987	3251.21	2	0	1	0	0	0	0.0274618
9989	3251.25	2	0	1	0	0	0	0.0277826
9991	3251.28	2	0	1	0	0	0	0.0284322
9993	3251.31	2	0	1	0	0	0	0.0285013
9995	3251.35	2	0	1	0	0	0	0.0286533
9997	3251.38	2	0	1	0	0	0	0.0288493
9999	3251.41	2	0	1	0	0	0	0.029916
10001	3251.45	2	0	1	0	0	0	0.0296838
10003	3251.48	2	0	1	0	0	0	0.029697
10005	3251.51	2	0	1	0	0	0	0.0299303
10007	3251.55	2	0	1	0	0	0	0.030165
10009	3251.58	2	0	1	0	0	0	0.0312156
10011	3251.61	2	0	1	0	0	0	0.0320857
10013	3251.65	2	0	1	0	0	0	0.0324521
10015	3251.68	2	0	1	0	0	0	0.0329947
10017	3251.71	2	0	1	0	0	0	0.0330279
10019	3251.75	2	0	1	0	0	0	0.0329372
10021	3251.78	2	0	1	0	0	0	0.0320159
10023	3251.81	2	0	1	0	0	0	0.0313548
10025	3251.85	2	0	1	0	0	0	0.0309604
10027	3251.88	2	0	1	0	0	0	0.0311926
10029	3251.91	2	0	1	0	0	0	0.0315588
10031	3251.95	2	0	1	0	0	0	0.0305615
10033	3251.98	2	0	1	0	0	0	0.0293277
10035	3252.01	2	0	1	0	0	0	0.0292936
10037	3252.05	2	0	1	0	0	0	0.0299014
10039	3252.08	2	0	1	0	0	0	0.0304572
10041	3252.11	2	0	1	0	0	0	0.0299903
10043	3252.15	2	0	1	0	0	0	0.030029
10045	3252.18	2	0	1	0	0	0	0.0308816
10047	3252.21	2	0	1	0	0	0	0.0301102
10049	3252.25	2	0	1	0	0	0	0.0310476
10051	3252.28	2	0	1	0	0	0	0.0319528
10053	3252.31	2	0	1	0	0	0	0.031572
10055	3252.35	2	0	1	0	0	0	0.0311877
10057	3252.38	2	0	1	0	0	0	0.0309677
10059	3252.41	2	0	1	0	0	0	0.031482
10061	3252.45	2	0	1	0	0	0	0.0318771
10063	3252.48	2	0	1	0	0	0	0.032154
10065	3252.51	2	0	1	0	0	0	0.0315479
10067	3252.55	2	0	1	0	0	0	0.0308066
10069	3252.58	2	0	1	0	0	0	0.0305684
10071	3252.61	2	0	1	0	0	0	0.0300175
10073	3252.65	2	0	1	0	0	0	0.0312334
10075	3252.68	2	0	1	0	0	0	0.0309782
10077	3252.71	2	0	1	0	0	0	0.0303128
10079	3252.75	2	0	1	0	0	0	0.0301758
10081	3252.78	2	0	1	0	0	0	0.0306912
10083	3252.81	2	0	1	0	0	0	0.0304516
10085	3252.85	2	0	1	0	0	0	0.0305723
10087	3252.88	2	0	1	0	0	0	0.0308056
10089	3252.91	2	0	1	0	0	0	0.0316812
10091	3252.95	2	0	1	0	0	0	0.0319884
10093	3252.98	2	0	1	0	0	0	0.0323925
10095	3253.01	2	0	1	0	0	0	0.0324943
10097	3253.05	2	0	1	0	0	0	0.0327015
10099	3253.08	2	0	1	0	0	0	0.0326938
10101	3253.11	2	0	1	0	0	0	0.0310946
10103	3253.15	2	0	1	0	0	0	0.0311131
10105	3253.18	2	0	1	0	0	0	0.0308198
10107	3253.21	2	0	1	0	0	0	0.0304143
10109	3253.25	2	0	1	0	0	0	0.030362
10111	3253.28	2	0	1	0	0	0	0.0310326
10113	3253.31	2	0	1	0	0	0	0.0304174
10115	3253.35	2	0	1	0	0	0	0.0296081
10117	3253.38	2	0	1	0	0	0	0.0304875
10119	3253.41	2	0	1	0	0	0	0.0304868
10121	3253.45	2	0	1	0	0	0	0.03015
10123	3253.48	2	0	1	0	0	0	0.0301828
10125	3253.51	2	0	1	0	0	0	0.0301556
10127	3253.55	2	0	1	0	0	0	0.0301583
10129	3253.58	2	0	1	0	0	0	0.0297577
10131	3253.61	2	0	1	0	0	0	0.0290857
10133	3253.65	2	0	1	0	0	0	0.0301678
10135	3253.68	2	0	1	0	0	0	0.0302807
10137	3253.71	2	0	1	0	0	0	0.0302535
10139	3253.75	2	0	1	0	0	0	0.030142
10141	3253.78	2	0	1	0	0	0	0.029886
10143	3253.81	2	0	1	0	0	0	0.0300551
10145	3253.85	2	0	1	0	0	0	0.0303986
10147	3253.88	2	0	1	0	0	0	0.0307553
10149	3253.91	2	0	1	0	0	0	0.0304234
10151	3253.95	2	0	1	0	0	0	0.0302863
10153	3253.98	2	0	1	0	0	0	0.0314636
10155	3254.01	2	0	1	0	0	0	0.0308589
10157	3254.05	2	0	1	0	0	0	0.0305234
10159	3254.08	2	0	1	0	0	0	0.0303167
10161	3254.11	2	0	1	0	0	0	0.0303153
10163	3254.15	2	0	1	0	0	0	0.0302623
10165	3254.18	2	0	1	0	0	0	0.0303721
10167	3254.21	2	0	1	0	0	0	0.0305904
10169	3254.25	2	0	1	0	0	0	0.0308959
10171	3254.28	2	0	1	0	0	0	0.0315228
10173	3254.31	2	0	1	0	0	0	0.0311808
10175	3254.35	2	0	1	0	0	0	0.0306978
10177	3254.38	2	0	1	0	0	0	0.0302281
10179	3254.41	2	0	1	0	0	0	0.0300684
10181	3254.45	2	0	1	0	0	0	0.0311428
10183	3254.48	2	0	1	0	0	0	0.0307069
10185	3254.51	2	0	1	0	0	0	0.0299693
10187	3254.55	2	0	1	0	0	0	0.0302595
10189	3254.58	2	0	1	0	0	0	0.0310388
10191	3254.61	2	0	1	0	0	0	0.0315033
10193	3254.65	2	0	1	0	0	0	0.0304753
10195	3254.68	2	0	1	0	0	0	0.0306856
10197	3254.71	2	0	1	0	0	0	0.031028
10199	3254.75	2	0	1	0	0	0	0.0311494
10201	3254.78	2	0	1	0	0	0	0.0313631
10203	3254.81	2	0	1	0	0	0	0.0313617
10205	3254.85	2	0	1	0	0	0	0.0311396
10207	3254.88	2	0	1	0	0	0	0.0309722
10209	3254.91	2	0	1	0	0	0	0.0306089
10211	3254.95	2	0	1	0	0	0	0.0314419
10213	3254.98	2	0	1	0	0	0	0.0311999
10215	3255.01	2	0	1	0	0	0	0.0309918
10217	3255.05	2	0	1	0	0	0	0.0306172
10219	3255.08	2	0	1	0	0	0	0.0305719
10221	3255.11	2	0	1	0	0	0	0.0304213
10223	3255.15	2	0	1	0	0	0	0.030446
10225	3255.18	2	0	1	0	0	0	0.0304234
10227	3255.21	2	0	1	0	0	0	0.0307682
10229	3255.25	2	0	1	0	0	0	0.0307396
10231	3255.28	2	0	1	0	0	0	0.0306385
10233	3255.31	2	0	1	0	0	0	0.0312379
10235	3255.35	2	0	1	0	0	0	0.0311333
10237	3255.38	2	0	1	0	0	0	0.0303418
10239	3255.41	2	0	1	0	0	0	0.0302518
10241	3255.45	2	0	1	0	0	0	0.0303941
10243	3255.48	2	0	1	0	0	0	0.0305862
10245	3255.51	2	0	1	0	0	0	0.0304603
10247	3255.55	2	0	1	0	0	0	0.0305499
10249	3255.58	2	0	1	0	0	0	0.0299969
10251	3255.61	2	0	1	0	0	0	0.0290857
10253	3255.65	2	0	1	0	0	0	0.0292548
10255	3255.68	2	0	1	0	0	0	0.0288395
10257	3255.71	2	0	1	0	0	0	0.0282575
10259	3255.75	2	0	1	0	0	0	0.0287035
10261	3255.78	2	0	1	0	0	0	0.0293323
10263	3255.81	2	0	1	0	0	0	0.0292859
10265	3255.85	2	0	1	0	0	0	0.0294585
10267	3255.88	2	0	1	0	0	0	0.0291987
10269	3255.91	2	0	1	0	0	0	0.0290899
10271	3255.95	2	0	1	0	0	0	0.0294724
10273	3255.98	2	0	1	0	0	0	0.0300966
10275	3256.01	2	0	1	0	0	0	0.0304506
10277	3256.05	2	0	1	0	0	0	0.0303958
10279	3256.08	2	0	1	0	0	0	0.0304331
10281	3256.11	2	0	1	0	0	0	0.0306465
10283	3256.15	2	0	1	0	0	0	0.0303184
10285	3256.18	2	0	1	0	0	0	0.030627
10287	3256.21	2	0	1	0	0	0	0.0301859
10289	3256.25	2	0	1	0	0	0	0.0299606
10291	3256.28	2	0	1	0	0	0	0.0298215
10293	3256.31	2	0	1	0	0	0	0.0300164
10295	3256.35	2	0	1	0	0	0	0.0304146
10297	3256.38	2	0	1	0	0	0	0.030188
10299	3256.41	2	0	1	0	0	0	0.0297657
10301	3256.45	2	0	1	0	0	0	0.029773
10303	3256.48	2	0	1	0	0	0	0.0298372
10305	3256.51	2	0	1	0	0	0	0.0299959
10307	3256.55	2	0	1	0	0	0	0.030067
10309	3256.58	2	0	1	0	0	0	0.0298361
10311	3256.61	2	0	1	0	0	0	0.0300042
10313	3256.65	2	0	1	0	0	0	0.0300771
10315	3256.68	2	0	1	0	0	0	0.0306661
10317	3256.71	2	0	1	0	0	0	0.0301632
10319	3256.75	2	0	1	0	0	0	0.0292151
10321	3256.78	2	0	1	0	0	0	0.029085
10323	3256.81	2	0	1	0	0	0	0.0295607
10325	3256.85	2	0	1	0	0	0	0.0298184
10327	3256.88	2	0	1	0	0	0	0.0297842
10329	3256.91	2	0	1	0	0	0	0.0290237
10331	3256.95	2	0	1	0	0	0	0.0291666
10333	3256.98	2	0	1	0	0	0	0.0287391
10335	3257.01	2	0	1	0	0	0	0.0292618
10337	3257.05	2	0	1	0	0	0	0.0289295
10339	3257.08	2	0	1	0	0	0	0.0298009
10341	3257.11	2	0	1	0	0	0	0.0299059
10343	3257.15	2	0	1	0	0	0	0.0303721
10345	3257.18	2	0	1	0	0	0	0.0303554
10347	3257.21	2	0	1	0	0	0	0.0301322
10349	3257.25	2	0	1	0	0	0	0.0309945
10351	3257.28	2	0	1	0	0	0	0.031043
10353	3257.31	2	0	1	0	0	0	0.0307926
10355	3257.35	2	0	1	0	0	0	0.0303072
10357	3257.38	2	0	1	0	0	0	0.0295603
10359	3257.41	2	0	1	0	0	0	0.0290934
10361	3257.45	2	0	1	0	0	0	0.0280713
10363	3257.48	2	0	1	0	0	0	0.0278426
10365	3257.51	2	0	1	0	0	0	0.0285926
10367	3257.55	2	0	1	0	0	0	0.0280389
10369	3257.58	2	0	1	0	0	0	0.027656
10371	3257.61	2	0	1	0	0	0	0.028087
10373	3257.65	2	0	1	0	0	0	0.0278433
10375	3257.68	2	0	1	0	0	0	0.0278959
10377	3257.71	2	0	1	0	0	0	0.0284567
10379	3257.75	2	0	1	0	0	0	0.0281735
10381	3257.78	2	0	1	0	0	0	0.0279224
10383	3257.81	2	0	1	0	0	0	0.0282391
10385	3257.85	2	0	1	0	0	0	0.0287356
10387	3257.88	2	0	1	0	0	0	0.0284947
10389	3257.91	2	0	1	0	0	0	0.0282823
10391	3257.95	2	0	1	0	0	0	0.0282778
10393	3257.98	2	0	1	0	0	0	0.0279985
10395	3258.01	2	0	1	0	0	0	0.0277383
10397	3258.05	2	0	1	0	0	0	0.0279911
10399	3258.08	2	0	1	0	0	0	0.0281153
10401	3258.11	2	0	1	0	0	0	0.0279444
10403	3258.15	2	0	1	0	0	0	0.0279238
10405	3258.18	2	0	1	0	0	0	0.0279862
10407	3258.21	2	0	1	0	0	0	0.0278213
10409	3258.25	2	0	1	0	0	0	0.0278876
10411	3258.28	2	0	1	0	0	0	0.0277087
10413	3258.31	2	0	1	0	0	0	0.0278705
10415	3258.35	2	0	1	0	0	0	0.0278496
10417	3258.38	2	0	1	0	0	0	0.0277749
10419	3258.41	2	0	1	0	0	0	0.0279015
10421	3258.45	2	0	1	0	0	0	0.0279929
10423	3258.48	2	0	1	0	0	0	0.0281278
10425	3258.51	2	0	1	0	0	0	0.0280337
10427	3258.55	2	0	1	0	0	0	0.0278813
10429	3258.58	2	0	1	0	0	0	0.0282087
10431	3258.61	2	0	1	0	0	0	0.0282283
10433	3258.65	2	0	1	0	0	0	0.0282251
10435	3258.68	2	0	1	0	0	0	0.0282066
10437	3258.71	2	0	1	0	0	0	0.0280828
10439	3258.75	2	0	1	0	0	0	0.0281822
10441	3258.78	2	0	1	0	0	0	0.0280243
10443	3258.81	2	0	1	0	0	0	0.0278844
10445	3258.85	2	0	1	0	0	0	0.0281707
10447	3258.88	2	0	1	0	0	0	0.0278182
10449	3258.91	2	0	1	0	0	0	0.027187
10451	3258.95	2	0	1	0	0	0	0.0278115
10453	3258.98	2	0	1	0	0	0	0.0281202
10455	3259.01	2	0	1	0	0	0	0.0287091
10457	3259.05	2	0	1	0	0	0	0.0291216
10459	3259.08	2	0	1	0	0	0	0.0295408
10461	3259.11	2	0	1	0	0	0	0.029303
10463	3259.15	2	0	1	0	0	0	0.0295094
10465	3259.18	2	0	1	0	0	0	0.0298769
10467	3259.21	2	0	1	0	0	0	0.0299568
10469	3259.25	2	0	1	0	0	0	0.0300914
10471	3259.28	2	0	1	0	0	0	0.0292922
10473	3259.31	2	0	1	0	0	0	0.0279866
10475	3259.35	2	0	1	0	0	0	0.0284009
10477	3259.38	2	0	1	0	0	0	0.027398
10479	3259.41	2	0	1	0	0	0	0.0271915
10481	3259.45	2	0	1	0	0	0	0.0271284
10483	3259.48	2	0	1	0	0	0	0.0265339
10485	3259.51	2	0	1	0	0	0	0.0270489
10487	3259.55	2	0	1	0	0	0	0.0276867
10489	3259.58	2	0	1	0	0	0	0.0283848
10491	3259.61	2	0	1	0	0	0	0.0283531
10493	3259.65	2	0	1	0	0	0	0.0275497
10495	3259.68	2	0	1	0	0	0	0.026959
10497	3259.71	2	0	1	0	0	0	0.0271765
10499	3259.75	2	0	1	0	0	0	0.0266552
10501	3259.78	2	0	1	0	0	0	0.0261705
10503	3259.81	2	0	1	0	0	0	0.0265391
10505	3259.85	2	0	1	0	0	0	0.0266165
10507	3259.88	2	0	1	0	0	0	0.0269192
10509	3259.91	2	0	1	0	0	0	0.0269544
10511	3259.95	2	0	1	0	0	0	0.0274824
10513	3259.98	2	0	1	0	0	0	0.0274604
10515	3260.01	2	0	1	0	0	0	0.0282439
10517	3260.05	2	0	1	0	0	0	0.0284685
10519	3260.08	2	0	1	0	0	0	0.0289222
10521	3260.11	2	0	1	0	0	0	0.0292106
10523	3260.15	2	0	1	0	0	0	0.029146
10525	3260.18	2	0	1	0	0	0	0.0291816
10527	3260.21	2	0	1	0	0	0	0.0292904
10529	3260.25	2	0	1	0	0	0	0.0292388
10531	3260.28	2	0	1	0	0	0	0.0291778
10533	3260.31	2	0	1	0	0	0	0.0293312
10535	3260.35	2	0	1	0	0	0	0.0284929
10537	3260.38	2	0	1	0	0	0	0.0273349
10539	3260.41	2	0	1	0	0	0	0.0275988
10541	3260.45	2	0	1	0	0	0	0.0270524
10543	3260.48	2	0	1	0	0	0	0.0267176
10545	3260.51	2	0	1	0	0	0	0.0271291
10547	3260.55	2	0	1	0	0	0	0.0266434
10549	3260.58	2	0	1	0	0	0	0.0263194
10551	3260.61	2	0	1	0	0	0	0.0267295
10553	3260.65	2	0	1	0	0	0	0.0263993
10555	3260.68	2	0	1	0	0	0	0.0264345
10557	3260.71	2	0	1	0	0	0	0.0275402
10559	3260.75	2	0	1	0	0	0	0.0276389
10561	3260.78	2	0	1	0	0	0	0.0275402
10563	3260.81	2	0	1	0	0	0	0.0277233
10565	3260.85	2	0	1	0	0	0	0.0286376
10567	3260.88	2	0	1	0	0	0	0.0287527
10569	3260.91	2	0	1	0	0	0	0.0287482
10571	3260.95	2	0	1	0	0	0	0.0294083
10573	3260.98	2	0	1	0	0	0	0.0290781
10575	3261.01	2	0	1	0	0	0	0.0282467
10577	3261.05	2	0	1	0	0	0	0.0283472
10579	3261.08	2	0	1	0	0	0	0.0273938
10581	3261.11	2	0	1	0	0	0	0.0271309
10583	3261.15	2	0	1	0	0	0	0.0273955
10585	3261.18	2	0	1	0	0	0	0.0270249
10587	3261.21	2	0	1	0	0	0	0.0269502
10589	3261.25	2	0	1	0	0	0	0.0271082
10591	3261.28	2	0	1	0	0	0	0.0268896
10593	3261.31	2	0	1	0	0	0	0.0264174
10595	3261.35	2	0	1	0	0	0	0.0269112
10597	3261.38	2	0	1	0	0	0	0.0276832
10599	3261.41	2	0	1	0	0	0	0.027353
10601	3261.45	2	0	1	0	0	0	0.027528
10603	3261.48	2	0	1	0	0	0	0.0282921
10605	3261.51	2	0	1	0	0	0	0.0281358
10607	3261.55	2	0	1	0	0	0	0.027656
10609	3261.58	2	0	1	0	0	0	0.0279779
10611	3261.61	2	0	1	0	0	0	0.0282485
10613	3261.65	2	0	1	0	0	0	0.0276637
10615	3261.68	2	0	1	0	0	0	0.0279395
10617	3261.71	2	0	1	0	0	0	0.0281888
10619	3261.75	2	0	1	0	0	0	0.0275124
10621	3261.78	2	0	1	0	0	0	0.0273774
10623	3261.81	2	0	1	0	0	0	0.0276619
10625	3261.85	2	0	1	0	0	0	0.0279597
10627	3261.88	2	0	1	0	0	0	0.0286387
10629	3261.91	2	0	1	0	0	0	0.0291091
10631	3261.95	2	0	1	0	0	0	0.0297807
10633	3261.98	2	0	1	0	0	0	0.0297612
10635	3262.01	2	0	1	0	0	0	0.0300032
10637	3262.05	2	0	1	0	0	0	0.0298191
10639	3262.08	2	0	1	0	0	0	0.0298954
10641	3262.11	2	0	1	0	0	0	0.0301866
10643	3262.15	2	0	1	0	0	0	0.0305039
10645	3262.18	2	0	1	0	0	0	0.0296231
10647	3262.21	2	0	1	0	0	0	0.028834
10649	3262.25	2	0	1	0	0	0	0.0293961
10651	3262.28	2	0	1	0	0	0	0.0284671
10653	3262.31	2	0	1	0	0	0	0.0277209
10655	3262.35	2	0	1	0	0	0	0.0281861
10657	3262.38	2	0	1	0	0	0	0.0278764
10659	3262.41	2	0	1	0	0	0	0.0279033
10661	3262.45	2	0	1	0	0	0	0.0282642
10663	3262.48	2	0	1	0	0	0	0.0290728
10665	3262.51	2	0	1	0	0	0	0.0296862
10667	3262.55	2	0	1	0	0	0	0.0299017
10669	3262.58	2	0	1	0	0	0	0.0304185
10671	3262.61	2	0	1	0	0	0	0.0302089
10673	3262.65	2	0	1	0	0	0	0.0304659
10675	3262.68	2	0	1	0	0	0	0.0307205
10677	3262.71	2	0	1	0	0	0	0.0304174
10679	3262.75	2	0	1	0	0	0	0.0306814
10681	3262.78	2	0	1	0	0	0	0.0311107
10683	3262.81	2	0	1	0	0	0	0.03074
10685	3262.85	2	0	1	0	0	0	0.0306643
10687	3262.88	2	0	1	0	0	0	0.0301747
10689	3262.91	2	0	1	0	0	0	0.0302476
10691	3262.95	2	0	1	0	0	0	0.0309304
10693	3262.98	2	0	1	0	0	0	0.0304638
10695	3263.01	2	0	1	0	0	0	0.0302888
10697	3263.05	2	0	1	0	0	0	0.0305015
10699	3263.08	2	0	1	0	0	0	0.0307466
10701	3263.11	2	0	1	0	0	0	0.0304506
10703	3263.15	2	0	1	0	0	0	0.0302814
10705	3263.18	2	0	1	0	0	0	0.0308237
10707	3263.21	2	0	1	0	0	0	0.0296695
10709	3263.25	2	0	1	0	0	0	0.0284615
10711	3263.28	2	0	1	0	0	0	0.0289075
10713	3263.31	2	0	1	0	0	0	0.0283778
10715	3263.35	2	0	1	0	0	0	0.0280501
10717	3263.38	2	0	1	0	0	0	0.0283587
10719	3263.41	2	0	1	0	0	0	0.0285142
10721	3263.45	2	0	1	0	0	0	0.0283105
10723	3263.48	2	0	1	0	0	0	0.0282303
10725	3263.51	2	0	1	0	0	0	0.0284211
10727	3263.55	2	0	1	0	0	0	0.0282983
10729	3263.58	2	0	1	0	0	0	0.0285787
10731	3263.61	2	0	1	0	0	0	0.0284926
10733	3263.65	2	0	1	0	0	0	0.0282066
10735	3263.68	2	0	1	0	0	0	0.0281948
10737	3263.71	2	0	1	0	0	0	0.0283057
10739	3263.75	2	0	1	0	0	0	0.0281484
10741	3263.78	2	0	1	0	0	0	0.0285839
10743	3263.81	2	0	1	0	0	0	0.0291286
10745	3263.85	2	0	1	0	0	0	0.0297657
10747	3263.88	2	0	1	0	0	0	0.0299066
10749	3263.91	2	0	1	0	0	0	0.0300959
10751	3263.95	2	0	1	0	0	0	0.0289755
10753	3263.98	2	0	1	0	0	0	0.0281864
10755	3264.01	2	0	1	0	0	0	0.028449
10757	3264.05	2	0	1	0	0	0	0.027738
10759	3264.08	2	0	1	0	0	0	0.0270775
10761	3264.11	2	0	1	0	0	0	0.0275305
10763	3264.15	2	0	1	0	0	0	0.0272139
10765	3264.18	2	0	1	0	0	0	0.0271692
10767	3264.21	2	0	1	0	0	0	0.0278185
10769	3264.25	2	0	1	0	0	0	0.0271291
10771	3264.28	2	0	1	0	0	0	0.0273377
10773	3264.31	2	0	1	0	0	0	0.0282694
10775	3264.35	2	0	1	0	0	0	0.0281453
10777	3264.38	2	0	1	0	0	0	0.0289169
10779	3264.41	2	0	1	0	0	0	0.0296642
10781	3264.45	2	0	1	0	0	0	0.0295254
10783	3264.48	2	0	1	0	0	0	0.0299355
10785	3264.51	2	0	1	0	0	0	0.0303575
10787	3264.55	2	0	1	0	0	0	0.0301116
10789	3264.58	2	0	1	0	0	0	0.0296695
10791	3264.61	2	0	1	0	0	0	0.0297835
10793	3264.65	2	0	1	0	0	0	0.029251
10795	3264.68	2	0	1	0	0	0	0.029055
10797	3264.71	2	0	1	0	0	0	0.0292698
10799	3264.75	2	0	1	0	0	0	0.0292716
10801	3264.78	2	0	1	0	0	0	0.0291998
10803	3264.81	2	0	1	0	0	0	0.0288859
10805	3264.85	2	0	1	0	0	0	0.0291705
10807	3264.88	2	0	1	0	0	0	0.0289651
10809	3264.91	2	0	1	0	0	0	0.0289086
10811	3264.95	2	0	1	0	0	0	0.0289717
10813	3264.98	2	0	1	0	0	0	0.0289731
10815	3265.01	2	0	1	0	0	0	0.0291195
10817	3265.05	2	0	1	0	0	0	0.0290324
10819	3265.08	2	0	1	0	0	0	0.0289853
10821	3265.11	2	0	1	0	0	0	0.0292475
10823	3265.15	2	0	1	0	0	0	0.0289591
10825	3265.18	2	0	1	0	0	0	0.0289047
10827	3265.21	2	0	1	0	0	0	0.0287771
10829	3265.25	2	0	1	0	0	0	0.0287586
10831	3265.28	2	0	1	0	0	0	0.0288333
10833	3265.31	2	0	1	0	0	0	0.0285735
10835	3265.35	2	0	1	0	0	0	0.0286878
10837	3265.38	2	0	1	0	0	0	0.028676
10839	3265.41	2	0	1	0	0	0	0.0287381
10841	3265.45	2	0	1	0	0	0	0.0287883
10843	3265.48	2	0	1	0	0	0	0.0285097
10845	3265.51	2	0	1	0	0	0	0.0287053
10847	3265.55	2	0	1	0	0	0	0.0288904
10849	3265.58	2	0	1	0	0	0	0.0286394
10851	3265.61	2	0	1	0	0	0	0.0287088
10853	3265.65	2	0	1	0	0	0	0.0287109
10855	3265.68	2	0	1	0	0	0	0.0286066
10857	3265.71	2	0	1	0	0	0	0.0286927
10859	3265.75	2	0	1	0	0	0	0.0284671
10861	3265.78	2	0	1	0	0	0	0.0286523
10863	3265.81	2	0	1	0	0	0	0.0284218
10865	3265.85	2	0	1	0	0	0	0.0281637
10867	3265.88	2	0	1	0	0	0	0.0284225
10869	3265.91	2	0	1	0	0	0	0.0285023
10871	3265.95	2	0	1	0	0	0	0.0285048
10873	3265.98	2	0	1	0	0	0	0.028532
10875	3266.01	2	0	1	0	0	0	0.0283315
10877	3266.05	2	0	1	0	0	0	0.0284295
10879	3266.08	2	0	1	0	0	0	0.0280023
10881	3266.11	2	0	1	0	0	0	0.027906
10883	3266.15	2	0	1	0	0	0	0.0279664
10885	3266.18	2	0	1	0	0	0	0.0279964
10887	3266.21	2	0	1	0	0	0	0.028199
10889	3266.25	2	0	1	0	0	0	0.0277125
10891	3266.28	2	0	1	0	0	0	0.0278656
10893	3266.31	2	0	1	0	0	0	0.0287639
10895	3266.35	2	0	1	0	0	0	0.0288535
10897	3266.38	2	0	1	0	0	0	0.0287398
10899	3266.41	2	0	1	0	0	0	0.0293159
10901	3266.45	2	0	1	0	0	0	0.0293846
10903	3266.48	2	0	1	0	0	0	0.0293992
10905	3266.51	2	0	1	0	0	0	0.0290362
10907	3266.55	2	0	1	0	0	0	0.0276567
10909	3266.58	2	0	1	0	0	0	0.0274447
10911	3266.61	2	0	1	0	0	0	0.027815
10913	3266.65	2	0	1	0	0	0	0.0273652
10915	3266.68	2	0	1	0	0	0	0.0272975
10917	3266.71	2	0	1	0	0	0	0.0276006
10919	3266.75	2	0	1	0	0	0	0.0276553
10921	3266.78	2	0	1	0	0	0	0.0279305
10923	3266.81	2	0	1	0	0	0	0.0280082
10925	3266.85	2	0	1	0	0	0	0.0284211
10927	3266.88	2	0	1	0	0	0	0.0283098
10929	3266.91	2	0	1	0	0	0	0.0284915
10931	3266.95	2	0	1	0	0	0	0.0285714
10933	3266.98	2	0	1	0	0	0	0.0289769
10935	3267.01	2	0	1	0	0	0	0.0289891
10937	3267.05	2	0	1	0	0	0	0.0285253
10939	3267.08	2	0	1	0	0	0	0.0284961
10941	3267.11	2	0	1	0	0	0	0.0285933
10943	3267.15	2	0	1	0	0	0	0.0286453
10945	3267.18	2	0	1	0	0	0	0.0286286
10947	3267.21	2	0	1	0	0	0	0.0284772
10949	3267.25	2	0	1	0	0	0	0.0284943
10951	3267.28	2	0	1	0	0	0	0.0284622
10953	3267.31	2	0	1	0	0	0	0.0285993
10955	3267.35	2	0	1	0	0	0	0.0288936
10957	3267.38	2	0	1	0	0	0	0.0286812
10959	3267.41	2	0	1	0	0	0	0.0285721
10961	3267.45	2	0	1	0	0	0	0.0286509
10963	3267.48	2	0	1	0	0	0	0.028789
10965	3267.51	2	0	1	0	0	0	0.0287182
10967	3267.55	2	0	1	0	0	0	0.0281721
10969	3267.58	2	0	1	0	0	0	0.0283489
10971	3267.61	2	0	1	0	0	0	0.0287747
10973	3267.65	2	0	1	0	0	0	0.0285648
10975	3267.68	2	0	1	0	0	0	0.0285334
10977	3267.71	2	0	1	0	0	0	0.0283963
10979	3267.75	2	0	1	0	0	0	0.0285501
10981	3267.78	2	0	1	0	0	0	0.0285853
10983	3267.81	2	0	1	0	0	0	0.0283398
10985	3267.85	2	0	1	0	0	0	0.0282502
10987	3267.88	2	0	1	0	0	0	0.0284152
10989	3267.91	2	0	1	0	0	0	0.0284002
10991	3267.95	2	0	1	0	0	0	0.0285128
10993	3267.98	2	0	1	0	0	0	0.0284511
10995	3268.01	2	0	1	0	0	0	0.0284797
10997	3268.05	2	0	1	0	0	0	0.0285051
10999	3268.08	2	0	1	0	0	0	0.0283179
11001	3268.11	2	0	1	0	0	0	0.0284169
11003	3268.15	2	0	1	0	0	0	0.0286697
11005	3268.18	2	0	1	0	0	0	0.0284765
11007	3268.21	2	0	1	0	0	0	0.028526
11009	3268.25	2	0	1	0	0	0	0.0283405
11011	3268.28	2	0	1	0	0	0	0.0282722
11013	3268.31	2	0	1	0	0	0	0.0285389
11015	3268.35	2	0	1	0	0	0	0.0282816
11017	3268.38	2	0	1	0	0	0	0.0277666
11019	3268.41	2	0	1	0	0	0	0.0277659
11021	3268.45	2	0	1	0	0	0	0.0280079
11023	3268.48	2	0	1	0	0	0	0.0273007
11025	3268.51	2	0	1	0	0	0	0.0274743
11027	3268.55	2	0	1	0	0	0	0.028268
11029	3268.58	2	0	1	0	0	0	0.0276829
11031	3268.61	2	0	1	0	0	0	0.0271647
11033	3268.65	2	0	1	0	0	0	0.0280121
11035	3268.68	2	0	1	0	0	0	0.029046
11037	3268.71	2	0	1	0	0	0	0.0292053
11039	3268.75	2	0	1	0	0	0	0.0293874
11041	3268.78	2	0	1	0	0	0	0.0294759
11043	3268.81	2	0	1	0	0	0	0.0302215
11045	3268.85	2	0	1	0	0	0	0.0302487
11047	3268.88	2	0	1	0	0	0	0.0306772
11049	3268.91	2	0	1	0	0	0	0.0310357
11051	3268.95	2	0	1	0	0	0	0.0306228
11053	3268.98	2	0	1	0	0	0	0.0304544
11055	3269.01	2	0	1	0	0	0	0.030331
11057	3269.05	2	0	1	0	0	0	0.030596
11059	3269.08	2	0	1	0	0	0	0.0304258
11061	3269.11	2	0	1	0	0	0	0.0302127
11063	3269.15	2	0	1	0	0	0	0.0306448
11065	3269.18	2	0	1	0	0	0	0.0301814
11067	3269.21	2	0	1	0	0	0	0.0305702
11069	3269.25	2	0	1	0	0	0	0.0304073
11071	3269.28	2	0	1	0	0	0	0.0296799
11073	3269.31	2	0	1	0	0	0	0.0297772
11075	3269.35	2	0	1	0	0	0	0.0295854
11077	3269.38	2	0	1	0	0	0	0.0296175
11079	3269.41	2	0	1	0	0	0	0.0301911
11081	3269.45	2	0	1	0	0	0	0.0297626
11083	3269.48	2	0	1	0	0	0	0.0302556
11085	3269.51	2	0	1	0	0	0	0.0309269
11087	3269.55	2	0	1	0	0	0	0.0311006
11089	3269.58	2	0	1	0	0	0	0.0313136
11091	3269.61	2	0	1	0	0	0	0.030537
11093	3269.65	2	0	1	0	0	0	0.0306221
11095	3269.68	2	0	1	0	0	0	0.0312815
11097	3269.71	2	0	1	0	0	0	0.0309604
11099	3269.75	2	0	1	0	0	0	0.0309119
11101	3269.78	2	0	1	0	0	0	0.0303913
11103	3269.81	2	0	1	0	0	0	0.0288305
11105	3269.85	2	0	1	0	0	0	0.0289947
11107	3269.88	2	0	1	0	0	0	0.0286362
11109	3269.91	2	0	1	0	0	0	0.02817
11111	3269.95	2	0	1	0	0	0	0.0284054
11113	3269.98	2	0	1	0	0	0	0.0285899
11115	3270.01	2	0	1	0	0	0	0.028147
11117	3270.05	2	0	1	0	0	0	0.0276811
11119	3270.08	2	0	1	0	0	0	0.0278513
[truncated: 34,159 more rows]

## Sheet: Mouse_2_415_Signal
FrameCounter	Timestamp	LedState	Stimulation	Output0	Output1	Input0	Input1	Region0G
7112	4939.11	1	0	1	0	0	0	0.0125022
7114	4939.14	1	0	1	0	0	0	0.0125193
7116	4939.18	1	0	1	0	0	0	0.0125455
7118	4939.21	1	0	1	0	0	0	0.0125085
7120	4939.24	1	0	1	0	0	0	0.0125796
7122	4939.28	1	0	1	0	0	0	0.0124935
7124	4939.31	1	0	1	0	0	0	0.0125629
7126	4939.34	1	0	1	0	0	0	0.0125165
7128	4939.38	1	0	1	0	0	0	0.0125308
7130	4939.41	1	0	1	0	0	0	0.0125284
7132	4939.44	1	0	1	0	0	0	0.0125172
7134	4939.48	1	0	1	0	0	0	0.0125476
7136	4939.51	1	0	1	0	0	0	0.0125406
7138	4939.54	1	0	1	0	0	0	0.0125266
7140	4939.58	1	0	1	0	0	0	0.012519
7142	4939.61	1	0	1	0	0	0	0.0125441
7144	4939.64	1	0	1	0	0	0	0.0125162
7146	4939.68	1	0	1	0	0	0	0.0125828
7148	4939.71	1	0	1	0	0	0	0.0125406
7150	4939.74	1	0	1	0	0	0	0.0125381
7152	4939.78	1	0	1	0	0	0	0.0125685
7154	4939.81	1	0	1	0	0	0	0.0125277
7156	4939.84	1	0	1	0	0	0	0.012536
7158	4939.88	1	0	1	0	0	0	0.0125734
7160	4939.91	1	0	1	0	0	0	0.0125702
7162	4939.94	1	0	1	0	0	0	0.0125657
7164	4939.98	1	0	1	0	0	0	0.0125326
7166	4940.01	1	0	1	0	0	0	0.0125354
7168	4940.04	1	0	1	0	0	0	0.012542
7170	4940.08	1	0	1	0	0	0	0.0125012
7172	4940.11	1	0	1	0	0	0	0.0124667
7174	4940.14	1	0	1	0	0	0	0.0125235
7176	4940.18	1	0	1	0	0	0	0.0125354
7178	4940.21	1	0	1	0	0	0	0.0125218
7180	4940.24	1	0	1	0	0	0	0.0125385
7182	4940.28	1	0	1	0	0	0	0.0125179
7184	4940.31	1	0	1	0	0	0	0.0125144
7186	4940.34	1	0	1	0	0	0	0.012543
7188	4940.38	1	0	1	0	0	0	0.0125211
7190	4940.41	1	0	1	0	0	0	0.0125012
7192	4940.44	1	0	1	0	0	0	0.0125019
7194	4940.48	1	0	1	0	0	0	0.0125092
7196	4940.51	1	0	1	0	0	0	0.0125106
7198	4940.54	1	0	1	0	0	0	0.012483
7200	4940.58	1	0	1	0	0	0	0.0125479
7202	4940.61	1	0	1	0	0	0	0.0125085
7204	4940.64	1	0	1	0	0	0	0.0124956
7206	4940.68	1	0	1	0	0	0	0.0124785
7208	4940.71	1	0	1	0	0	0	0.0124252
7210	4940.74	1	0	1	0	0	0	0.0124872
7212	4940.78	1	0	1	0	0	0	0.012481
7214	4940.81	1	0	1	0	0	0	0.0124572
7216	4940.84	1	0	1	0	0	0	0.0124461
7218	4940.88	1	0	1	0	0	0	0.0124869
7220	4940.91	1	0	1	0	0	0	0.0124987
7222	4940.94	1	0	1	0	0	0	0.01246
7224	4940.98	1	0	1	0	0	0	0.0124597
7226	4941.01	1	0	1	0	0	0	0.0124984
7228	4941.04	1	0	1	0	0	0	0.0124545
7230	4941.08	1	0	1	0	0	0	0.0124468
7232	4941.11	1	0	1	0	0	0	0.012468
7234	4941.14	1	0	1	0	0	0	0.01252
7236	4941.18	1	0	1	0	0	0	0.0124789
7238	4941.21	1	0	1	0	0	0	0.0124907
7240	4941.24	1	0	1	0	0	0	0.012483
7242	4941.28	1	0	1	0	0	0	0.0124764
7244	4941.31	1	0	1	0	0	0	0.012482
7246	4941.34	1	0	1	0	0	0	0.0124726
7248	4941.38	1	0	1	0	0	0	0.0124827
7250	4941.41	1	0	1	0	0	0	0.0124639
7252	4941.44	1	0	1	0	0	0	0.0124785
7254	4941.48	1	0	1	0	0	0	0.0124904
7256	4941.51	1	0	1	0	0	0	0.0124632
7258	4941.54	1	0	1	0	0	0	0.0125402
7260	4941.58	1	0	1	0	0	0	0.0124977
7262	4941.61	1	0	1	0	0	0	0.0125183
7264	4941.64	1	0	1	0	0	0	0.0124848
7266	4941.68	1	0	1	0	0	0	0.0125831
7268	4941.71	1	0	1	0	0	0	0.0125277
7270	4941.74	1	0	1	0	0	0	0.0125301
7272	4941.78	1	0	1	0	0	0	0.0125329
7274	4941.81	1	0	1	0	0	0	0.0125221
7276	4941.84	1	0	1	0	0	0	0.012528
7278	4941.88	1	0	1	0	0	0	0.0125915
7280	4941.91	1	0	1	0	0	0	0.0125643
7282	4941.94	1	0	1	0	0	0	0.0125605
7284	4941.98	1	0	1	0	0	0	0.0125828
7286	4942.01	1	0	1	0	0	0	0.0126002
7288	4942.04	1	0	1	0	0	0	0.0125688
7290	4942.08	1	0	1	0	0	0	0.012558
7292	4942.11	1	0	1	0	0	0	0.0125503
7294	4942.14	1	0	1	0	0	0	0.0125406
7296	4942.18	1	0	1	0	0	0	0.0125406
7298	4942.21	1	0	1	0	0	0	0.0125315
7300	4942.24	1	0	1	0	0	0	0.0125444
7302	4942.28	1	0	1	0	0	0	0.0125224
7304	4942.31	1	0	1	0	0	0	0.0125612
7306	4942.34	1	0	1	0	0	0	0.0125266
7308	4942.38	1	0	1	0	0	0	0.0125224
7310	4942.41	1	0	1	0	0	0	0.0124918
7312	4942.44	1	0	1	0	0	0	0.0125413
7314	4942.48	1	0	1	0	0	0	0.0125116
7316	4942.51	1	0	1	0	0	0	0.0124722
7318	4942.54	1	0	1	0	0	0	0.0124879
7320	4942.58	1	0	1	0	0	0	0.0125134
7322	4942.61	1	0	1	0	0	0	0.0124726
7324	4942.64	1	0	1	0	0	0	0.0124963
7326	4942.68	1	0	1	0	0	0	0.0124775
7328	4942.71	1	0	1	0	0	0	0.0124492
7330	4942.74	1	0	1	0	0	0	0.0125012
7332	4942.78	1	0	1	0	0	0	0.0124705
7334	4942.81	1	0	1	0	0	0	0.0125099
7336	4942.84	1	0	1	0	0	0	0.0124994
7338	4942.88	1	0	1	0	0	0	0.0125008
7340	4942.91	1	0	1	0	0	0	0.0125221
7342	4942.94	1	0	1	0	0	0	0.0125183
7344	4942.98	1	0	1	0	0	0	0.0124994
7346	4943.01	1	0	1	0	0	0	0.012519
7348	4943.04	1	0	1	0	0	0	0.0124785
7350	4943.08	1	0	1	0	0	0	0.0125392
7352	4943.11	1	0	1	0	0	0	0.0125406
7354	4943.14	1	0	1	0	0	0	0.0125266
7356	4943.18	1	0	1	0	0	0	0.012535
7358	4943.21	1	0	1	0	0	0	0.0125113
7360	4943.24	1	0	1	0	0	0	0.0125378
7362	4943.28	1	0	1	0	0	0	0.0125277
7364	4943.31	1	0	1	0	0	0	0.0125071
7366	4943.34	1	0	1	0	0	0	0.0125047
7368	4943.38	1	0	1	0	0	0	0.0125047
7370	4943.41	1	0	1	0	0	0	0.0125029
7372	4943.44	1	0	1	0	0	0	0.0125263
7374	4943.48	1	0	1	0	0	0	0.0125416
7376	4943.51	1	0	1	0	0	0	0.012468
7378	4943.54	1	0	1	0	0	0	0.0125399
7380	4943.58	1	0	1	0	0	0	0.0125095
7382	4943.61	1	0	1	0	0	0	0.0125151
7384	4943.64	1	0	1	0	0	0	0.0125371
7386	4943.68	1	0	1	0	0	0	0.0124649
7388	4943.71	1	0	1	0	0	0	0.0124872
7390	4943.74	1	0	1	0	0	0	0.0125123
7392	4943.78	1	0	1	0	0	0	0.0124806
7394	4943.81	1	0	1	0	0	0	0.0125172
7396	4943.84	1	0	1	0	0	0	0.0124803
7398	4943.88	1	0	1	0	0	0	0.0124468
7400	4943.91	1	0	1	0	0	0	0.0124778
7402	4943.94	1	0	1	0	0	0	0.0124632
7404	4943.98	1	0	1	0	0	0	0.0124987
7406	4944.01	1	0	1	0	0	0	0.0125155
7408	4944.04	1	0	1	0	0	0	0.0124925
7410	4944.08	1	0	1	0	0	0	0.0124726
7412	4944.11	1	0	1	0	0	0	0.0125158
7414	4944.14	1	0	1	0	0	0	0.0125228
7416	4944.18	1	0	1	0	0	0	0.0124869
7418	4944.21	1	0	1	0	0	0	0.0124946
7420	4944.24	1	0	1	0	0	0	0.0124883
7422	4944.28	1	0	1	0	0	0	0.0124886
7424	4944.31	1	0	1	0	0	0	0.0125095
7426	4944.34	1	0	1	0	0	0	0.0124932
7428	4944.38	1	0	1	0	0	0	0.012519
7430	4944.41	1	0	1	0	0	0	0.0125068
7432	4944.44	1	0	1	0	0	0	0.0125287
7434	4944.48	1	0	1	0	0	0	0.012535
7436	4944.51	1	0	1	0	0	0	0.0125085
7438	4944.54	1	0	1	0	0	0	0.0125517
7440	4944.58	1	0	1	0	0	0	0.0124897
7442	4944.61	1	0	1	0	0	0	0.0125256
7444	4944.64	1	0	1	0	0	0	0.0125102
7446	4944.68	1	0	1	0	0	0	0.0124792
7448	4944.71	1	0	1	0	0	0	0.0125472
7450	4944.74	1	0	1	0	0	0	0.0125204
7452	4944.78	1	0	1	0	0	0	0.0125528
7454	4944.81	1	0	1	0	0	0	0.0125287
7456	4944.84	1	0	1	0	0	0	0.0125259
7458	4944.88	1	0	1	0	0	0	0.0124806
7460	4944.91	1	0	1	0	0	0	0.0125388
7462	4944.94	1	0	1	0	0	0	0.0124708
7464	4944.98	1	0	1	0	0	0	0.0125137
7466	4945.01	1	0	1	0	0	0	0.0125064
7468	4945.04	1	0	1	0	0	0	0.0124607
7470	4945.08	1	0	1	0	0	0	0.0125054
7472	4945.11	1	0	1	0	0	0	0.0125176
7474	4945.14	1	0	1	0	0	0	0.0124862
7476	4945.18	1	0	1	0	0	0	0.0125116
7478	4945.21	1	0	1	0	0	0	0.0125151
7480	4945.24	1	0	1	0	0	0	0.0124925
7482	4945.28	1	0	1	0	0	0	0.0125298
7484	4945.31	1	0	1	0	0	0	0.0125085
7486	4945.34	1	0	1	0	0	0	0.0125347
7488	4945.38	1	0	1	0	0	0	0.0125434
7490	4945.41	1	0	1	0	0	0	0.012519
7492	4945.44	1	0	1	0	0	0	0.0125287
7494	4945.48	1	0	1	0	0	0	0.0124855
7496	4945.51	1	0	1	0	0	0	0.0124862
7498	4945.54	1	0	1	0	0	0	0.012513
7500	4945.58	1	0	1	0	0	0	0.012513
7502	4945.61	1	0	1	0	0	0	0.0124764
7504	4945.64	1	0	1	0	0	0	0.0124586
7506	4945.68	1	0	1	0	0	0	0.0124513
7508	4945.71	1	0	1	0	0	0	0.0124691
7510	4945.74	1	0	1	0	0	0	0.0124628
7512	4945.78	1	0	1	0	0	0	0.0124499
7514	4945.81	1	0	1	0	0	0	0.0124367
7516	4945.84	1	0	1	0	0	0	0.0124715
7518	4945.88	1	0	1	0	0	0	0.0124398
7520	4945.91	1	0	1	0	0	0	0.0124743
7522	4945.94	1	0	1	0	0	0	0.0124973
7524	4945.98	1	0	1	0	0	0	0.0124579
7526	4946.01	1	0	1	0	0	0	0.0124897
7528	4946.04	1	0	1	0	0	0	0.0124454
7530	4946.08	1	0	1	0	0	0	0.0124813
7532	4946.11	1	0	1	0	0	0	0.0124353
7534	4946.14	1	0	1	0	0	0	0.0124482
7536	4946.18	1	0	1	0	0	0	0.0124792
7538	4946.21	1	0	1	0	0	0	0.0124708
7540	4946.24	1	0	1	0	0	0	0.012436
7542	4946.28	1	0	1	0	0	0	0.0124321
7544	4946.31	1	0	1	0	0	0	0.0124475
7546	4946.34	1	0	1	0	0	0	0.0124367
7548	4946.38	1	0	1	0	0	0	0.0124381
7550	4946.41	1	0	1	0	0	0	0.0124409
7552	4946.44	1	0	1	0	0	0	0.0124102
7554	4946.48	1	0	1	0	0	0	0.0124551
7556	4946.51	1	0	1	0	0	0	0.0124433
7558	4946.54	1	0	1	0	0	0	0.0124705
7560	4946.58	1	0	1	0	0	0	0.0124684
7562	4946.61	1	0	1	0	0	0	0.0124639
7564	4946.64	1	0	1	0	0	0	0.012452
7566	4946.68	1	0	1	0	0	0	0.0124014
7568	4946.71	1	0	1	0	0	0	0.0124154
7570	4946.74	1	0	1	0	0	0	0.0124454
7572	4946.78	1	0	1	0	0	0	0.0124273
7574	4946.81	1	0	1	0	0	0	0.012437
7576	4946.84	1	0	1	0	0	0	0.0124398
7578	4946.88	1	0	1	0	0	0	0.0124161
7580	4946.91	1	0	1	0	0	0	0.0124478
7582	4946.94	1	0	1	0	0	0	0.0124485
7584	4946.98	1	0	1	0	0	0	0.0124266
7586	4947.01	1	0	1	0	0	0	0.0124311
7588	4947.04	1	0	1	0	0	0	0.0124395
7590	4947.08	1	0	1	0	0	0	0.0124293
7592	4947.11	1	0	1	0	0	0	0.0124395
7594	4947.14	1	0	1	0	0	0	0.0124164
7596	4947.18	1	0	1	0	0	0	0.0124642
7598	4947.21	1	0	1	0	0	0	0.012437
7600	4947.24	1	0	1	0	0	0	0.0123966
7602	4947.28	1	0	1	0	0	0	0.0124402
7604	4947.31	1	0	1	0	0	0	0.0124534
7606	4947.34	1	0	1	0	0	0	0.0124499
7608	4947.38	1	0	1	0	0	0	0.0124391
7610	4947.41	1	0	1	0	0	0	0.0124583
7612	4947.44	1	0	1	0	0	0	0.0124621
7614	4947.48	1	0	1	0	0	0	0.0124904
7616	4947.51	1	0	1	0	0	0	0.0125029
7618	4947.54	1	0	1	0	0	0	0.0124771
7620	4947.58	1	0	1	0	0	0	0.0124869
7622	4947.61	1	0	1	0	0	0	0.0124419
7624	4947.64	1	0	1	0	0	0	0.0125294
7626	4947.68	1	0	1	0	0	0	0.0125095
7628	4947.71	1	0	1	0	0	0	0.0124628
7630	4947.74	1	0	1	0	0	0	0.0124858
7632	4947.78	1	0	1	0	0	0	0.0124827
7634	4947.81	1	0	1	0	0	0	0.0125224
7636	4947.84	1	0	1	0	0	0	0.0125197
7638	4947.88	1	0	1	0	0	0	0.0125109
7640	4947.91	1	0	1	0	0	0	0.0125179
7642	4947.94	1	0	1	0	0	0	0.0124928
7644	4947.98	1	0	1	0	0	0	0.0125249
7646	4948.01	1	0	1	0	0	0	0.0124956
7648	4948.04	1	0	1	0	0	0	0.0124694
7650	4948.08	1	0	1	0	0	0	0.0125019
7652	4948.11	1	0	1	0	0	0	0.0124977
7654	4948.14	1	0	1	0	0	0	0.0124925
7656	4948.18	1	0	1	0	0	0	0.0124635
7658	4948.21	1	0	1	0	0	0	0.0124395
7660	4948.24	1	0	1	0	0	0	0.0124384
7662	4948.28	1	0	1	0	0	0	0.0124796
7664	4948.31	1	0	1	0	0	0	0.0124656
7666	4948.34	1	0	1	0	0	0	0.0124356
7668	4948.38	1	0	1	0	0	0	0.0124708
7670	4948.41	1	0	1	0	0	0	0.0124482
7672	4948.44	1	0	1	0	0	0	0.0124259
7674	4948.48	1	0	1	0	0	0	0.0124178
7676	4948.51	1	0	1	0	0	0	0.012421
7678	4948.54	1	0	1	0	0	0	0.0124562
7680	4948.58	1	0	1	0	0	0	0.0124318
7682	4948.61	1	0	1	0	0	0	0.0124307
7684	4948.64	1	0	1	0	0	0	0.0124164
7686	4948.68	1	0	1	0	0	0	0.0124283
7688	4948.71	1	0	1	0	0	0	0.0124053
7690	4948.74	1	0	1	0	0	0	0.0124126
7692	4948.78	1	0	1	0	0	0	0.0124266
7694	4948.81	1	0	1	0	0	0	0.0124199
7696	4948.84	1	0	1	0	0	0	0.0124705
7698	4948.88	1	0	1	0	0	0	0.0124307
7700	4948.91	1	0	1	0	0	0	0.0124367
7702	4948.94	1	0	1	0	0	0	0.0124422
7704	4948.98	1	0	1	0	0	0	0.0124524
7706	4949.01	1	0	1	0	0	0	0.0124496
7708	4949.04	1	0	1	0	0	0	0.0124252
7710	4949.08	1	0	1	0	0	0	0.0124489
7712	4949.11	1	0	1	0	0	0	0.0124091
7714	4949.14	1	0	1	0	0	0	0.0124482
7716	4949.18	1	0	1	0	0	0	0.0124722
7718	4949.21	1	0	1	0	0	0	0.0124398
7720	4949.24	1	0	1	0	0	0	0.0124293
7722	4949.28	1	0	1	0	0	0	0.0124611
7724	4949.31	1	0	1	0	0	0	0.0124363
7726	4949.34	1	0	1	0	0	0	0.0123868
7728	4949.38	1	0	1	0	0	0	0.0124321
7730	4949.41	1	0	1	0	0	0	0.012445
7732	4949.44	1	0	1	0	0	0	0.0124398
7734	4949.48	1	0	1	0	0	0	0.0124405
7736	4949.51	1	0	1	0	0	0	0.0124227
7738	4949.54	1	0	1	0	0	0	0.0124607
7740	4949.58	1	0	1	0	0	0	0.0124527
7742	4949.61	1	0	1	0	0	0	0.0124112
7744	4949.64	1	0	1	0	0	0	0.0124412
7746	4949.68	1	0	1	0	0	0	0.0124684
7748	4949.71	1	0	1	0	0	0	0.0124893
7750	4949.74	1	0	1	0	0	0	0.0124565
7752	4949.78	1	0	1	0	0	0	0.0124586
7754	4949.81	1	0	1	0	0	0	0.0124771
7756	4949.84	1	0	1	0	0	0	0.0124102
7758	4949.88	1	0	1	0	0	0	0.0124168
7760	4949.91	1	0	1	0	0	0	0.0124384
7762	4949.94	1	0	1	0	0	0	0.0124388
7764	4949.98	1	0	1	0	0	0	0.0124471
7766	4950.01	1	0	1	0	0	0	0.0124911
7768	4950.04	1	0	1	0	0	0	0.0124171
7770	4950.08	1	0	1	0	0	0	0.0124429
7772	4950.11	1	0	1	0	0	0	0.0124269
7774	4950.14	1	0	1	0	0	0	0.0124412
7776	4950.18	1	0	1	0	0	0	0.0124611
7778	4950.21	1	0	1	0	0	0	0.012421
7780	4950.24	1	0	1	0	0	0	0.0124611
7782	4950.28	1	0	1	0	0	0	0.0123938
7784	4950.31	1	0	1	0	0	0	0.0124733
7786	4950.34	1	0	1	0	0	0	0.0123878
7788	4950.38	1	0	1	0	0	0	0.012489
7790	4950.41	1	0	1	0	0	0	0.0124586
7792	4950.44	1	0	1	0	0	0	0.0124733
7794	4950.48	1	0	1	0	0	0	0.0124551
7796	4950.51	1	0	1	0	0	0	0.0124733
7798	4950.54	1	0	1	0	0	0	0.0124736
7800	4950.58	1	0	1	0	0	0	0.0124555
7802	4950.61	1	0	1	0	0	0	0.0125204
7804	4950.64	1	0	1	0	0	0	0.0124823
7806	4950.68	1	0	1	0	0	0	0.0124872
7808	4950.71	1	0	1	0	0	0	0.0125423
7810	4950.74	1	0	1	0	0	0	0.012474
7812	4950.78	1	0	1	0	0	0	0.0124865
7814	4950.81	1	0	1	0	0	0	0.0124625
7816	4950.84	1	0	1	0	0	0	0.0124646
7818	4950.88	1	0	1	0	0	0	0.0124771
7820	4950.91	1	0	1	0	0	0	0.0124558
7822	4950.94	1	0	1	0	0	0	0.0125085
7824	4950.98	1	0	1	0	0	0	0.0124803
7826	4951.01	1	0	1	0	0	0	0.0125176
7828	4951.04	1	0	1	0	0	0	0.0125075
7830	4951.08	1	0	1	0	0	0	0.0124757
7832	4951.11	1	0	1	0	0	0	0.012474
7834	4951.14	1	0	1	0	0	0	0.0124959
7836	4951.18	1	0	1	0	0	0	0.0124872
7838	4951.21	1	0	1	0	0	0	0.0125287
7840	4951.24	1	0	1	0	0	0	0.0125273
7842	4951.28	1	0	1	0	0	0	0.0125029
7844	4951.31	1	0	1	0	0	0	0.0125371
7846	4951.34	1	0	1	0	0	0	0.0125036
7848	4951.38	1	0	1	0	0	0	0.0124959
7850	4951.41	1	0	1	0	0	0	0.0125235
7852	4951.44	1	0	1	0	0	0	0.0125022
7854	4951.48	1	0	1	0	0	0	0.0125134
7856	4951.51	1	0	1	0	0	0	0.0124876
7858	4951.54	1	0	1	0	0	0	0.0124632
7860	4951.58	1	0	1	0	0	0	0.0125507
7862	4951.61	1	0	1	0	0	0	0.0125263
7864	4951.64	1	0	1	0	0	0	0.0124837
7866	4951.68	1	0	1	0	0	0	0.0124876
7868	4951.71	1	0	1	0	0	0	0.0124858
7870	4951.74	1	0	1	0	0	0	0.0124886
7872	4951.78	1	0	1	0	0	0	0.0124998
7874	4951.81	1	0	1	0	0	0	0.0124918
7876	4951.84	1	0	1	0	0	0	0.0125061
7878	4951.88	1	0	1	0	0	0	0.0124279
7880	4951.91	1	0	1	0	0	0	0.0125291
7882	4951.94	1	0	1	0	0	0	0.0124932
7884	4951.98	1	0	1	0	0	0	0.0124377
7886	4952.01	1	0	1	0	0	0	0.0125305
7888	4952.04	1	0	1	0	0	0	0.0124733
7890	4952.08	1	0	1	0	0	0	0.0124252
7892	4952.11	1	0	1	0	0	0	0.0124339
7894	4952.14	1	0	1	0	0	0	0.0124213
7896	4952.18	1	0	1	0	0	0	0.0124123
7898	4952.21	1	0	1	0	0	0	0.0124217
7900	4952.24	1	0	1	0	0	0	0.0124461
7902	4952.28	1	0	1	0	0	0	0.0124259
7904	4952.31	1	0	1	0	0	0	0.0123481
7906	4952.34	1	0	1	0	0	0	0.0124046
7908	4952.38	1	0	1	0	0	0	0.012383
7910	4952.41	1	0	1	0	0	0	0.0124102
7912	4952.44	1	0	1	0	0	0	0.0123763
7914	4952.48	1	0	1	0	0	0	0.0123868
7916	4952.51	1	0	1	0	0	0	0.0124137
7918	4952.54	1	0	1	0	0	0	0.0124119
7920	4952.58	1	0	1	0	0	0	0.0123882
7922	4952.61	1	0	1	0	0	0	0.0123687
7924	4952.64	1	0	1	0	0	0	0.0123735
7926	4952.68	1	0	1	0	0	0	0.0123826
7928	4952.71	1	0	1	0	0	0	0.0123896
7930	4952.74	1	0	1	0	0	0	0.0123488
7932	4952.78	1	0	1	0	0	0	0.0124011
7934	4952.81	1	0	1	0	0	0	0.0123871
7936	4952.84	1	0	1	0	0	0	0.0124185
7938	4952.88	1	0	1	0	0	0	0.0124039
7940	4952.91	1	0	1	0	0	0	0.0124569
7942	4952.94	1	0	1	0	0	0	0.0124398
7944	4952.98	1	0	1	0	0	0	0.0124604
7946	4953.01	1	0	1	0	0	0	0.012445
7948	4953.04	1	0	1	0	0	0	0.0124381
7950	4953.08	1	0	1	0	0	0	0.0124492
7952	4953.11	1	0	1	0	0	0	0.0124391
7954	4953.14	1	0	1	0	0	0	0.0124276
7956	4953.18	1	0	1	0	0	0	0.0124545
7958	4953.21	1	0	1	0	0	0	0.0125176
7960	4953.24	1	0	1	0	0	0	0.0124035
7962	4953.28	1	0	1	0	0	0	0.012475
7964	4953.31	1	0	1	0	0	0	0.0124562
7966	4953.34	1	0	1	0	0	0	0.0124897
7968	4953.38	1	0	1	0	0	0	0.0125054
7970	4953.41	1	0	1	0	0	0	0.0124778
7972	4953.44	1	0	1	0	0	0	0.0124998
7974	4953.48	1	0	1	0	0	0	0.0125008
7976	4953.51	1	0	1	0	0	0	0.0124928
7978	4953.54	1	0	1	0	0	0	0.0124952
7980	4953.58	1	0	1	0	0	0	0.0124579
7982	4953.61	1	0	1	0	0	0	0.0124517
7984	4953.64	1	0	1	0	0	0	0.0124593
7986	4953.68	1	0	1	0	0	0	0.0124011
7988	4953.71	1	0	1	0	0	0	0.0124147
7990	4953.74	1	0	1	0	0	0	0.0123994
7992	4953.78	1	0	1	0	0	0	0.0124091
7994	4953.81	1	0	1	0	0	0	0.0124283
7996	4953.84	1	0	1	0	0	0	0.0124077
7998	4953.88	1	0	1	0	0	0	0.0124307
8000	4953.91	1	0	1	0	0	0	0.0123694
8002	4953.94	1	0	1	0	0	0	0.0124276
8004	4953.98	1	0	1	0	0	0	0.0124485
8006	4954.01	1	0	1	0	0	0	0.0123938
8008	4954.04	1	0	1	0	0	0	0.0124154
8010	4954.08	1	0	1	0	0	0	0.0123885
8012	4954.11	1	0	1	0	0	0	0.0124042
8014	4954.14	1	0	1	0	0	0	0.0124335
8016	4954.18	1	0	1	0	0	0	0.0123844
8018	4954.21	1	0	1	0	0	0	0.0124203
8020	4954.24	1	0	1	0	0	0	0.012376
8022	4954.28	1	0	1	0	0	0	0.0123816
8024	4954.31	1	0	1	0	0	0	0.0124119
8026	4954.34	1	0	1	0	0	0	0.0123903
8028	4954.38	1	0	1	0	0	0	0.0124321
8030	4954.41	1	0	1	0	0	0	0.0124042
8032	4954.44	1	0	1	0	0	0	0.0123938
8034	4954.48	1	0	1	0	0	0	0.0124067
8036	4954.51	1	0	1	0	0	0	0.0123763
8038	4954.54	1	0	1	0	0	0	0.0123533
8040	4954.58	1	0	1	0	0	0	0.0124231
8042	4954.61	1	0	1	0	0	0	0.0123945
8044	4954.64	1	0	1	0	0	0	0.0123858
8046	4954.68	1	0	1	0	0	0	0.0124011
8048	4954.71	1	0	1	0	0	0	0.0123652
8050	4954.74	1	0	1	0	0	0	0.0123662
8052	4954.78	1	0	1	0	0	0	0.0123955
8054	4954.81	1	0	1	0	0	0	0.012392
8056	4954.84	1	0	1	0	0	0	0.0123885
8058	4954.88	1	0	1	0	0	0	0.0124161
8060	4954.91	1	0	1	0	0	0	0.012406
8062	4954.94	1	0	1	0	0	0	0.0123739
8064	4954.98	1	0	1	0	0	0	0.0124098
8066	4955.01	1	0	1	0	0	0	0.0123837
8068	4955.04	1	0	1	0	0	0	0.0124109
8070	4955.08	1	0	1	0	0	0	0.0124011
8072	4955.11	1	0	1	0	0	0	0.0123749
8074	4955.14	1	0	1	0	0	0	0.0124419
8076	4955.18	1	0	1	0	0	0	0.0124203
8078	4955.21	1	0	1	0	0	0	0.0124123
8080	4955.24	1	0	1	0	0	0	0.012421
8082	4955.28	1	0	1	0	0	0	0.0124199
8084	4955.31	1	0	1	0	0	0	0.0124199
8086	4955.34	1	0	1	0	0	0	0.0124377
8088	4955.38	1	0	1	0	0	0	0.012415
8090	4955.41	1	0	1	0	0	0	0.0124175
8092	4955.44	1	0	1	0	0	0	0.0124133
8094	4955.48	1	0	1	0	0	0	0.0124597
8096	4955.51	1	0	1	0	0	0	0.0124555
8098	4955.54	1	0	1	0	0	0	0.0124618
8100	4955.58	1	0	1	0	0	0	0.0124429
8102	4955.61	1	0	1	0	0	0	0.0124621
8104	4955.64	1	0	1	0	0	0	0.0125099
8106	4955.68	1	0	1	0	0	0	0.0124374
8108	4955.71	1	0	1	0	0	0	0.0124492
8110	4955.74	1	0	1	0	0	0	0.012452
8112	4955.78	1	0	1	0	0	0	0.0124928
8114	4955.81	1	0	1	0	0	0	0.0123976
8116	4955.84	1	0	1	0	0	0	0.0124816
8118	4955.88	1	0	1	0	0	0	0.0124558
8120	4955.91	1	0	1	0	0	0	0.0124719
8122	4955.94	1	0	1	0	0	0	0.0124227
8124	4955.98	1	0	1	0	0	0	0.0124283
8126	4956.01	1	0	1	0	0	0	0.0124109
8128	4956.04	1	0	1	0	0	0	0.0123767
8130	4956.08	1	0	1	0	0	0	0.0124722
8132	4956.11	1	0	1	0	0	0	0.0124046
8134	4956.14	1	0	1	0	0	0	0.0124137
8136	4956.18	1	0	1	0	0	0	0.0124402
8138	4956.21	1	0	1	0	0	0	0.0124032
8140	4956.24	1	0	1	0	0	0	0.0123973
8142	4956.28	1	0	1	0	0	0	0.012398
8144	4956.31	1	0	1	0	0	0	0.0123586
8146	4956.34	1	0	1	0	0	0	0.0124032
8148	4956.38	1	0	1	0	0	0	0.0124192
8150	4956.41	1	0	1	0	0	0	0.0124067
8152	4956.44	1	0	1	0	0	0	0.0124095
8154	4956.48	1	0	1	0	0	0	0.0123861
8156	4956.51	1	0	1	0	0	0	0.0124161
8158	4956.54	1	0	1	0	0	0	0.0124095
8160	4956.58	1	0	1	0	0	0	0.0124339
8162	4956.61	1	0	1	0	0	0	0.0124238
8164	4956.64	1	0	1	0	0	0	0.0124007
8166	4956.68	1	0	1	0	0	0	0.0124541
8168	4956.71	1	0	1	0	0	0	0.0124273
8170	4956.74	1	0	1	0	0	0	0.0124042
8172	4956.78	1	0	1	0	0	0	0.0124534
8174	4956.81	1	0	1	0	0	0	0.0124558
8176	4956.84	1	0	1	0	0	0	0.0124499
8178	4956.88	1	0	1	0	0	0	0.0124105
8180	4956.91	1	0	1	0	0	0	0.012407
8182	4956.94	1	0	1	0	0	0	0.0124042
8184	4956.98	1	0	1	0	0	0	0.0124426
8186	4957.01	1	0	1	0	0	0	0.0123997
8188	4957.04	1	0	1	0	0	0	0.0124297
8190	4957.08	1	0	1	0	0	0	0.0123791
8192	4957.11	1	0	1	0	0	0	0.0124224
8194	4957.14	1	0	1	0	0	0	0.012429
8196	4957.18	1	0	1	0	0	0	0.012398
8198	4957.21	1	0	1	0	0	0	0.0124262
8200	4957.24	1	0	1	0	0	0	0.0124105
8202	4957.28	1	0	1	0	0	0	0.0124252
8204	4957.31	1	0	1	0	0	0	0.0123603
8206	4957.34	1	0	1	0	0	0	0.0124217
8208	4957.38	1	0	1	0	0	0	0.0124328
8210	4957.41	1	0	1	0	0	0	0.0124286
8212	4957.44	1	0	1	0	0	0	0.012399
8214	4957.48	1	0	1	0	0	0	0.0124558
8216	4957.51	1	0	1	0	0	0	0.0124035
8218	4957.54	1	0	1	0	0	0	0.012414
8220	4957.58	1	0	1	0	0	0	0.0124098
8222	4957.61	1	0	1	0	0	0	0.0124311
8224	4957.64	1	0	1	0	0	0	0.0124492
8226	4957.68	1	0	1	0	0	0	0.012444
8228	4957.71	1	0	1	0	0	0	0.0124112
8230	4957.74	1	0	1	0	0	0	0.0124255
8232	4957.78	1	0	1	0	0	0	0.0124639
8234	4957.81	1	0	1	0	0	0	0.0124304
8236	4957.84	1	0	1	0	0	0	0.012338
8238	4957.88	1	0	1	0	0	0	0.0123767
8240	4957.91	1	0	1	0	0	0	0.0123178
8242	4957.94	1	0	1	0	0	0	0.0123464
8244	4957.98	1	0	1	0	0	0	0.0123453
8246	4958.01	1	0	1	0	0	0	0.012362
8248	4958.04	1	0	1	0	0	0	0.0123742
8250	4958.08	1	0	1	0	0	0	0.0124182
8252	4958.11	1	0	1	0	0	0	0.0124161
8254	4958.14	1	0	1	0	0	0	0.0124203
8256	4958.18	1	0	1	0	0	0	0.0123816
8258	4958.21	1	0	1	0	0	0	0.0124405
8260	4958.24	1	0	1	0	0	0	0.0124579
8262	4958.28	1	0	1	0	0	0	0.0124314
8264	4958.31	1	0	1	0	0	0	0.0124293
8266	4958.34	1	0	1	0	0	0	0.0124164
8268	4958.38	1	0	1	0	0	0	0.0124049
8270	4958.41	1	0	1	0	0	0	0.012368
8272	4958.44	1	0	1	0	0	0	0.0123673
8274	4958.48	1	0	1	0	0	0	0.0123104
8276	4958.51	1	0	1	0	0	0	0.0123237
8278	4958.54	1	0	1	0	0	0	0.0122529
8280	4958.58	1	0	1	0	0	0	0.0123003
8282	4958.61	1	0	1	0	0	0	0.0123178
8284	4958.64	1	0	1	0	0	0	0.0123275
8286	4958.68	1	0	1	0	0	0	0.0123293
8288	4958.71	1	0	1	0	0	0	0.0123132
8290	4958.74	1	0	1	0	0	0	0.012294
8292	4958.78	1	0	1	0	0	0	0.0122923
8294	4958.81	1	0	1	0	0	0	0.012285
8296	4958.84	1	0	1	0	0	0	0.0123226
8298	4958.88	1	0	1	0	0	0	0.0123188
8300	4958.91	1	0	1	0	0	0	0.0123631
8302	4958.94	1	0	1	0	0	0	0.0123575
8304	4958.98	1	0	1	0	0	0	0.012383
8306	4959.01	1	0	1	0	0	0	0.0123927
8308	4959.04	1	0	1	0	0	0	0.0123687
8310	4959.08	1	0	1	0	0	0	0.0123484
8312	4959.11	1	0	1	0	0	0	0.0123523
8314	4959.14	1	0	1	0	0	0	0.0123056
8316	4959.18	1	0	1	0	0	0	0.012323
8318	4959.21	1	0	1	0	0	0	0.0122871
8320	4959.24	1	0	1	0	0	0	0.0122954
8322	4959.28	1	0	1	0	0	0	0.0123192
8324	4959.31	1	0	1	0	0	0	0.0123422
8326	4959.34	1	0	1	0	0	0	0.0122986
8328	4959.38	1	0	1	0	0	0	0.012316
8330	4959.41	1	0	1	0	0	0	0.0123303
8332	4959.44	1	0	1	0	0	0	0.012347
8334	4959.47	1	0	1	0	0	0	0.0122205
8336	4959.51	1	0	1	0	0	0	0.0122717
8338	4959.54	1	0	1	0	0	0	0.0122187
8340	4959.57	1	0	1	0	0	0	0.0122648
8342	4959.61	1	0	1	0	0	0	0.0122337
8344	4959.64	1	0	1	0	0	0	0.0121629
8346	4959.67	1	0	1	0	0	0	0.0121556
8348	4959.71	1	0	1	0	0	0	0.0121947
8350	4959.74	1	0	1	0	0	0	0.0122369
8352	4959.77	1	0	1	0	0	0	0.0122201
8354	4959.81	1	0	1	0	0	0	0.0121671
8356	4959.84	1	0	1	0	0	0	0.0121696
8358	4959.87	1	0	1	0	0	0	0.0121992
8360	4959.91	1	0	1	0	0	0	0.0122452
8362	4959.94	1	0	1	0	0	0	0.0121877
8364	4959.97	1	0	1	0	0	0	0.0122159
8366	4960.01	1	0	1	0	0	0	0.0121814
8368	4960.04	1	0	1	0	0	0	0.0122348
8370	4960.07	1	0	1	0	0	0	0.0121912
8372	4960.11	1	0	1	0	0	0	0.012225
8374	4960.14	1	0	1	0	0	0	0.0121661
8376	4960.17	1	0	1	0	0	0	0.0121619
8378	4960.21	1	0	1	0	0	0	0.0121947
8380	4960.24	1	0	1	0	0	0	0.0122222
8382	4960.27	1	0	1	0	0	0	0.0122323
8384	4960.31	1	0	1	0	0	0	0.0122166
8386	4960.34	1	0	1	0	0	0	0.0122104
8388	4960.37	1	0	1	0	0	0	0.0122417
8390	4960.41	1	0	1	0	0	0	0.0122689
8392	4960.44	1	0	1	0	0	0	0.0122825
8394	4960.47	1	0	1	0	0	0	0.0122853
8396	4960.51	1	0	1	0	0	0	0.0122658
8398	4960.54	1	0	1	0	0	0	0.012202
8400	4960.57	1	0	1	0	0	0	0.0122857
8402	4960.61	1	0	1	0	0	0	0.0122742
8404	4960.64	1	0	1	0	0	0	0.0122749
8406	4960.67	1	0	1	0	0	0	0.0122696
8408	4960.71	1	0	1	0	0	0	0.0122372
8410	4960.74	1	0	1	0	0	0	0.0122721
8412	4960.77	1	0	1	0	0	0	0.0122539
8414	4960.81	1	0	1	0	0	0	0.0122494
8416	4960.84	1	0	1	0	0	0	0.0122435
8418	4960.87	1	0	1	0	0	0	0.0121873
8420	4960.91	1	0	1	0	0	0	0.0122299
8422	4960.94	1	0	1	0	0	0	0.0122247
8424	4960.97	1	0	1	0	0	0	0.0122358
8426	4961.01	1	0	1	0	0	0	0.0122459
8428	4961.04	1	0	1	0	0	0	0.0122051
8430	4961.07	1	0	1	0	0	0	0.0122369
8432	4961.11	1	0	1	0	0	0	0.0122759
8434	4961.14	1	0	1	0	0	0	0.0122717
8436	4961.17	1	0	1	0	0	0	0.0121999
8438	4961.21	1	0	1	0	0	0	0.0122083
8440	4961.24	1	0	1	0	0	0	0.0121898
8442	4961.27	1	0	1	0	0	0	0.012248
8444	4961.31	1	0	1	0	0	0	0.0122445
8446	4961.34	1	0	1	0	0	0	0.0121947
8448	4961.37	1	0	1	0	0	0	0.0121919
8450	4961.41	1	0	1	0	0	0	0.0121873
8452	4961.44	1	0	1	0	0	0	0.0122285
8454	4961.47	1	0	1	0	0	0	0.0121971
8456	4961.51	1	0	1	0	0	0	0.0122079
8458	4961.54	1	0	1	0	0	0	0.0121647
8460	4961.57	1	0	1	0	0	0	0.0121968
8462	4961.61	1	0	1	0	0	0	0.0122194
8464	4961.64	1	0	1	0	0	0	0.0122567
8466	4961.67	1	0	1	0	0	0	0.0122114
8468	4961.71	1	0	1	0	0	0	0.0122581
8470	4961.74	1	0	1	0	0	0	0.0122114
8472	4961.77	1	0	1	0	0	0	0.0122564
8474	4961.81	1	0	1	0	0	0	0.0122595
8476	4961.84	1	0	1	0	0	0	0.0123017
8478	4961.87	1	0	1	0	0	0	0.0122627
8480	4961.91	1	0	1	0	0	0	0.0122979
8482	4961.94	1	0	1	0	0	0	0.0122937
8484	4961.97	1	0	1	0	0	0	0.0122759
8486	4962.01	1	0	1	0	0	0	0.0123345
8488	4962.04	1	0	1	0	0	0	0.0122665
8490	4962.07	1	0	1	0	0	0	0.0122731
8492	4962.11	1	0	1	0	0	0	0.0122989
8494	4962.14	1	0	1	0	0	0	0.0122815
8496	4962.17	1	0	1	0	0	0	0.0122599
8498	4962.21	1	0	1	0	0	0	0.0122996
8500	4962.24	1	0	1	0	0	0	0.0122857
8502	4962.27	1	0	1	0	0	0	0.0123143
8504	4962.31	1	0	1	0	0	0	0.0123038
8506	4962.34	1	0	1	0	0	0	0.0123324
8508	4962.37	1	0	1	0	0	0	0.0122961
8510	4962.41	1	0	1	0	0	0	0.0123038
8512	4962.44	1	0	1	0	0	0	0.0122892
8514	4962.47	1	0	1	0	0	0	0.0122864
8516	4962.51	1	0	1	0	0	0	0.0123188
8518	4962.54	1	0	1	0	0	0	0.0122965
8520	4962.57	1	0	1	0	0	0	0.0123443
8522	4962.61	1	0	1	0	0	0	0.0123247
8524	4962.64	1	0	1	0	0	0	0.0123192
8526	4962.67	1	0	1	0	0	0	0.0123226
8528	4962.71	1	0	1	0	0	0	0.0123523
8530	4962.74	1	0	1	0	0	0	0.0123436
8532	4962.77	1	0	1	0	0	0	0.0123673
8534	4962.81	1	0	1	0	0	0	0.01233
8536	4962.84	1	0	1	0	0	0	0.0123429
8538	4962.87	1	0	1	0	0	0	0.0123729
8540	4962.91	1	0	1	0	0	0	0.0123275
8542	4962.94	1	0	1	0	0	0	0.0124056
8544	4962.97	1	0	1	0	0	0	0.0123659
8546	4963.01	1	0	1	0	0	0	0.0123544
8548	4963.04	1	0	1	0	0	0	0.0123523
8550	4963.07	1	0	1	0	0	0	0.0123648
8552	4963.11	1	0	1	0	0	0	0.0124035
8554	4963.14	1	0	1	0	0	0	0.0123666
8556	4963.17	1	0	1	0	0	0	0.0123756
8558	4963.21	1	0	1	0	0	0	0.0123844
8560	4963.24	1	0	1	0	0	0	0.0123826
8562	4963.27	1	0	1	0	0	0	0.0123307
8564	4963.31	1	0	1	0	0	0	0.0123355
8566	4963.34	1	0	1	0	0	0	0.01233
8568	4963.37	1	0	1	0	0	0	0.0123735
8570	4963.41	1	0	1	0	0	0	0.0123889
8572	4963.44	1	0	1	0	0	0	0.012422
8574	4963.47	1	0	1	0	0	0	0.0123617
8576	4963.51	1	0	1	0	0	0	0.0124028
8578	4963.54	1	0	1	0	0	0	0.0123477
8580	4963.57	1	0	1	0	0	0	0.0124067
8582	4963.61	1	0	1	0	0	0	0.0123373
8584	4963.64	1	0	1	0	0	0	0.0122693
8586	4963.67	1	0	1	0	0	0	0.0123066
8588	4963.71	1	0	1	0	0	0	0.0122937
8590	4963.74	1	0	1	0	0	0	0.0123059
8592	4963.77	1	0	1	0	0	0	0.0123418
8594	4963.81	1	0	1	0	0	0	0.0123509
8596	4963.84	1	0	1	0	0	0	0.01236
8598	4963.87	1	0	1	0	0	0	0.0123303
8600	4963.91	1	0	1	0	0	0	0.012278
8602	4963.94	1	0	1	0	0	0	0.0123418
8604	4963.97	1	0	1	0	0	0	0.0123094
8606	4964.01	1	0	1	0	0	0	0.0123279
8608	4964.04	1	0	1	0	0	0	0.0123195
8610	4964.07	1	0	1	0	0	0	0.0122937
8612	4964.11	1	0	1	0	0	0	0.0122818
8614	4964.14	1	0	1	0	0	0	0.0123715
8616	4964.17	1	0	1	0	0	0	0.0123812
8618	4964.21	1	0	1	0	0	0	0.0124067
8620	4964.24	1	0	1	0	0	0	0.0123038
8622	4964.27	1	0	1	0	0	0	0.0123432
8624	4964.31	1	0	1	0	0	0	0.012362
8626	4964.34	1	0	1	0	0	0	0.0123638
8628	4964.37	1	0	1	0	0	0	0.0123512
8630	4964.41	1	0	1	0	0	0	0.0123265
8632	4964.44	1	0	1	0	0	0	0.0123481
8634	4964.47	1	0	1	0	0	0	0.012323
8636	4964.51	1	0	1	0	0	0	0.0123603
8638	4964.54	1	0	1	0	0	0	0.0123314
8640	4964.57	1	0	1	0	0	0	0.0123481
8642	4964.61	1	0	1	0	0	0	0.0123767
8644	4964.64	1	0	1	0	0	0	0.0122982
8646	4964.67	1	0	1	0	0	0	0.0123617
8648	4964.71	1	0	1	0	0	0	0.0123401
8650	4964.74	1	0	1	0	0	0	0.0123457
8652	4964.77	1	0	1	0	0	0	0.0123132
8654	4964.81	1	0	1	0	0	0	0.0122766
8656	4964.84	1	0	1	0	0	0	0.0123355
8658	4964.87	1	0	1	0	0	0	0.0123265
8660	4964.91	1	0	1	0	0	0	0.0123237
8662	4964.94	1	0	1	0	0	0	0.0123282
8664	4964.97	1	0	1	0	0	0	0.0122689
8666	4965.01	1	0	1	0	0	0	0.0122313
8668	4965.04	1	0	1	0	0	0	0.0122749
8670	4965.07	1	0	1	0	0	0	0.0123122
8672	4965.11	1	0	1	0	0	0	0.0122909
8674	4965.14	1	0	1	0	0	0	0.0122438
8676	4965.17	1	0	1	0	0	0	0.0122351
8678	4965.21	1	0	1	0	0	0	0.012247
8680	4965.24	1	0	1	0	0	0	0.0122634
8682	4965.27	1	0	1	0	0	0	0.012209
8684	4965.31	1	0	1	0	0	0	0.0122058
8686	4965.34	1	0	1	0	0	0	0.012263
8688	4965.37	1	0	1	0	0	0	0.0122815
8690	4965.41	1	0	1	0	0	0	0.0122424
8692	4965.44	1	0	1	0	0	0	0.0121629
8694	4965.47	1	0	1	0	0	0	0.0122002
8696	4965.51	1	0	1	0	0	0	0.0122114
8698	4965.54	1	0	1	0	0	0	0.0122111
8700	4965.57	1	0	1	0	0	0	0.0122463
8702	4965.61	1	0	1	0	0	0	0.0121954
8704	4965.64	1	0	1	0	0	0	0.0121992
8706	4965.67	1	0	1	0	0	0	0.0121887
8708	4965.71	1	0	1	0	0	0	0.0121451
8710	4965.74	1	0	1	0	0	0	0.0121525
8712	4965.77	1	0	1	0	0	0	0.01218
8714	4965.81	1	0	1	0	0	0	0.0121085
8716	4965.84	1	0	1	0	0	0	0.0120768
8718	4965.87	1	0	1	0	0	0	0.0121497
8720	4965.91	1	0	1	0	0	0	0.012028
8722	4965.94	1	0	1	0	0	0	0.0120887
8724	4965.97	1	0	1	0	0	0	0.0121082
8726	4966.01	1	0	1	0	0	0	0.0120841
8728	4966.04	1	0	1	0	0	0	0.0121291
8730	4966.07	1	0	1	0	0	0	0.0120848
8732	4966.11	1	0	1	0	0	0	0.0121633
8734	4966.14	1	0	1	0	0	0	0.0121873
8736	4966.17	1	0	1	0	0	0	0.0121947
8738	4966.21	1	0	1	0	0	0	0.0121894
8740	4966.24	1	0	1	0	0	0	0.0121413
8742	4966.27	1	0	1	0	0	0	0.0121577
8744	4966.31	1	0	1	0	0	0	0.0121525
8746	4966.34	1	0	1	0	0	0	0.0122131
8748	4966.37	1	0	1	0	0	0	0.0122459
8750	4966.41	1	0	1	0	0	0	0.0122247
8752	4966.44	1	0	1	0	0	0	0.0122177
8754	4966.47	1	0	1	0	0	0	0.01218
8756	4966.51	1	0	1	0	0	0	0.0121082
8758	4966.54	1	0	1	0	0	0	0.0120569
8760	4966.57	1	0	1	0	0	0	0.0121288
8762	4966.61	1	0	1	0	0	0	0.0121172
8764	4966.64	1	0	1	0	0	0	0.0121846
8766	4966.67	1	0	1	0	0	0	0.012119
8768	4966.71	1	0	1	0	0	0	0.0121444
8770	4966.74	1	0	1	0	0	0	0.0121288
8772	4966.77	1	0	1	0	0	0	0.0120486
8774	4966.81	1	0	1	0	0	0	0.0120831
8776	4966.84	1	0	1	0	0	0	0.0121281
8778	4966.87	1	0	1	0	0	0	0.0121396
8780	4966.91	1	0	1	0	0	0	0.0122062
8782	4966.94	1	0	1	0	0	0	0.0122463
8784	4966.97	1	0	1	0	0	0	0.0122491
8786	4967.01	1	0	1	0	0	0	0.0122316
8788	4967.04	1	0	1	0	0	0	0.0122529
8790	4967.07	1	0	1	0	0	0	0.0122484
8792	4967.11	1	0	1	0	0	0	0.0122742
8794	4967.14	1	0	1	0	0	0	0.0122637
8796	4967.17	1	0	1	0	0	0	0.0122567
8798	4967.21	1	0	1	0	0	0	0.0122459
8800	4967.24	1	0	1	0	0	0	0.012218
8802	4967.27	1	0	1	0	0	0	0.0122937
8804	4967.31	1	0	1	0	0	0	0.0122808
8806	4967.34	1	0	1	0	0	0	0.0122672
8808	4967.37	1	0	1	0	0	0	0.0122892
8810	4967.41	1	0	1	0	0	0	0.0123205
8812	4967.44	1	0	1	0	0	0	0.0123087
8814	4967.47	1	0	1	0	0	0	0.012278
8816	4967.51	1	0	1	0	0	0	0.0122752
8818	4967.54	1	0	1	0	0	0	0.0122731
8820	4967.57	1	0	1	0	0	0	0.0122463
8822	4967.61	1	0	1	0	0	0	0.0122693
8824	4967.64	1	0	1	0	0	0	0.0122759
8826	4967.67	1	0	1	0	0	0	0.0122456
8828	4967.71	1	0	1	0	0	0	0.0123209
8830	4967.74	1	0	1	0	0	0	0.012285
8832	4967.77	1	0	1	0	0	0	0.0123073
8834	4967.81	1	0	1	0	0	0	0.0123164
8836	4967.84	1	0	1	0	0	0	0.0122613
8838	4967.87	1	0	1	0	0	0	0.012294
8840	4967.91	1	0	1	0	0	0	0.0122993
8842	4967.94	1	0	1	0	0	0	0.0122968
8844	4967.97	1	0	1	0	0	0	0.0122595
8846	4968.01	1	0	1	0	0	0	0.0121776
8848	4968.04	1	0	1	0	0	0	0.012278
8850	4968.07	1	0	1	0	0	0	0.0122634
8852	4968.11	1	0	1	0	0	0	0.0122773
8854	4968.14	1	0	1	0	0	0	0.0122864
8856	4968.17	1	0	1	0	0	0	0.0122818
8858	4968.21	1	0	1	0	0	0	0.0123143
8860	4968.24	1	0	1	0	0	0	0.0123261
8862	4968.27	1	0	1	0	0	0	0.0123317
8864	4968.31	1	0	1	0	0	0	0.0122926
8866	4968.34	1	0	1	0	0	0	0.0123216
8868	4968.37	1	0	1	0	0	0	0.0123049
8870	4968.41	1	0	1	0	0	0	0.0123195
8872	4968.44	1	0	1	0	0	0	0.0122989
8874	4968.47	1	0	1	0	0	0	0.0123087
8876	4968.51	1	0	1	0	0	0	0.012278
8878	4968.54	1	0	1	0	0	0	0.0122906
8880	4968.57	1	0	1	0	0	0	0.0122965
8882	4968.61	1	0	1	0	0	0	0.0122784
8884	4968.64	1	0	1	0	0	0	0.0123115
8886	4968.67	1	0	1	0	0	0	0.012316
8888	4968.71	1	0	1	0	0	0	0.0123415
8890	4968.74	1	0	1	0	0	0	0.0123195
8892	4968.77	1	0	1	0	0	0	0.0122923
8894	4968.81	1	0	1	0	0	0	0.0123143
8896	4968.84	1	0	1	0	0	0	0.0122696
8898	4968.87	1	0	1	0	0	0	0.0122777
8900	4968.91	1	0	1	0	0	0	0.0123007
8902	4968.94	1	0	1	0	0	0	0.0123052
8904	4968.97	1	0	1	0	0	0	0.0122522
8906	4969.01	1	0	1	0	0	0	0.012225
8908	4969.04	1	0	1	0	0	0	0.0122358
8910	4969.07	1	0	1	0	0	0	0.0122491
8912	4969.11	1	0	1	0	0	0	0.0121863
8914	4969.14	1	0	1	0	0	0	0.0121957
8916	4969.17	1	0	1	0	0	0	0.0121657
8918	4969.21	1	0	1	0	0	0	0.0121751
8920	4969.24	1	0	1	0	0	0	0.0122058
8922	4969.27	1	0	1	0	0	0	0.0121856
8924	4969.31	1	0	1	0	0	0	0.012171
8926	4969.34	1	0	1	0	0	0	0.0121232
8928	4969.37	1	0	1	0	0	0	0.0121354
8930	4969.41	1	0	1	0	0	0	0.012248
8932	4969.44	1	0	1	0	0	0	0.0121964
8934	4969.47	1	0	1	0	0	0	0.0121378
8936	4969.51	1	0	1	0	0	0	0.0121288
8938	4969.54	1	0	1	0	0	0	0.01215
8940	4969.57	1	0	1	0	0	0	0.0122048
8942	4969.61	1	0	1	0	0	0	0.012188
8944	4969.64	1	0	1	0	0	0	0.0121483
8946	4969.67	1	0	1	0	0	0	0.0121696
8948	4969.71	1	0	1	0	0	0	0.0121849
8950	4969.74	1	0	1	0	0	0	0.012188
8952	4969.77	1	0	1	0	0	0	0.0121846
8954	4969.81	1	0	1	0	0	0	0.0121992
8956	4969.84	1	0	1	0	0	0	0.0121783
8958	4969.87	1	0	1	0	0	0	0.0122083
8960	4969.91	1	0	1	0	0	0	0.0122009
8962	4969.94	1	0	1	0	0	0	0.0121961
8964	4969.97	1	0	1	0	0	0	0.0122351
8966	4970.01	1	0	1	0	0	0	0.0122372
8968	4970.04	1	0	1	0	0	0	0.0122658
8970	4970.07	1	0	1	0	0	0	0.0122815
8972	4970.11	1	0	1	0	0	0	0.0122093
8974	4970.14	1	0	1	0	0	0	0.0122529
8976	4970.17	1	0	1	0	0	0	0.0122578
8978	4970.21	1	0	1	0	0	0	0.0122937
8980	4970.24	1	0	1	0	0	0	0.0122815
8982	4970.27	1	0	1	0	0	0	0.0122417
8984	4970.31	1	0	1	0	0	0	0.0122264
8986	4970.34	1	0	1	0	0	0	0.0122142
8988	4970.37	1	0	1	0	0	0	0.0122027
8990	4970.41	1	0	1	0	0	0	0.0122044
8992	4970.44	1	0	1	0	0	0	0.0122016
8994	4970.47	1	0	1	0	0	0	0.0122037
8996	4970.51	1	0	1	0	0	0	0.0122041
8998	4970.54	1	0	1	0	0	0	0.0122648
9000	4970.57	1	0	1	0	0	0	0.0122065
9002	4970.61	1	0	1	0	0	0	0.0121842
9004	4970.64	1	0	1	0	0	0	0.0122184
9006	4970.67	1	0	1	0	0	0	0.0121922
9008	4970.71	1	0	1	0	0	0	0.0122145
9010	4970.74	1	0	1	0	0	0	0.0121713
9012	4970.77	1	0	1	0	0	0	0.0122086
9014	4970.81	1	0	1	0	0	0	0.0122076
9016	4970.84	1	0	1	0	0	0	0.0122257
9018	4970.87	1	0	1	0	0	0	0.0122348
9020	4970.91	1	0	1	0	0	0	0.0121975
9022	4970.94	1	0	1	0	0	0	0.0122055
9024	4970.97	1	0	1	0	0	0	0.0122037
9026	4971.01	1	0	1	0	0	0	0.0122421
9028	4971.04	1	0	1	0	0	0	0.0122787
9030	4971.07	1	0	1	0	0	0	0.0122456
9032	4971.11	1	0	1	0	0	0	0.012225
9034	4971.14	1	0	1	0	0	0	0.0122093
9036	4971.17	1	0	1	0	0	0	0.0122445
9038	4971.21	1	0	1	0	0	0	0.0122923
9040	4971.24	1	0	1	0	0	0	0.0123094
9042	4971.27	1	0	1	0	0	0	0.0122403
9044	4971.31	1	0	1	0	0	0	0.0122386
9046	4971.34	1	0	1	0	0	0	0.0122306
9048	4971.37	1	0	1	0	0	0	0.0122428
9050	4971.41	1	0	1	0	0	0	0.0122644
9052	4971.44	1	0	1	0	0	0	0.0122431
9054	4971.47	1	0	1	0	0	0	0.0122567
9056	4971.51	1	0	1	0	0	0	0.0122564
9058	4971.54	1	0	1	0	0	0	0.0122675
9060	4971.57	1	0	1	0	0	0	0.0123477
9062	4971.61	1	0	1	0	0	0	0.0122892
9064	4971.64	1	0	1	0	0	0	0.0122578
9066	4971.67	1	0	1	0	0	0	0.0122965
9068	4971.71	1	0	1	0	0	0	0.012263
9070	4971.74	1	0	1	0	0	0	0.0123355
9072	4971.77	1	0	1	0	0	0	0.0122846
9074	4971.81	1	0	1	0	0	0	0.0122832
9076	4971.84	1	0	1	0	0	0	0.0122975
9078	4971.87	1	0	1	0	0	0	0.0122961
9080	4971.91	1	0	1	0	0	0	0.0122777
9082	4971.94	1	0	1	0	0	0	0.0122229
9084	4971.97	1	0	1	0	0	0	0.0122592
9086	4972.01	1	0	1	0	0	0	0.0122417
9088	4972.04	1	0	1	0	0	0	0.0122784
9090	4972.07	1	0	1	0	0	0	0.0122166
9092	4972.11	1	0	1	0	0	0	0.0121988
9094	4972.14	1	0	1	0	0	0	0.01221
9096	4972.17	1	0	1	0	0	0	0.0122006
9098	4972.21	1	0	1	0	0	0	0.0121832
9100	4972.24	1	0	1	0	0	0	0.0121737
9102	4972.27	1	0	1	0	0	0	0.0121706
9104	4972.31	1	0	1	0	0	0	0.0121968
9106	4972.34	1	0	1	0	0	0	0.0122229
9108	4972.37	1	0	1	0	0	0	0.012248
9110	4972.41	1	0	1	0	0	0	0.0122156
9112	4972.44	1	0	1	0	0	0	0.0121866
9114	4972.47	1	0	1	0	0	0	0.0122156
9116	4972.51	1	0	1	0	0	0	0.0122449
9118	4972.54	1	0	1	0	0	0	0.0122386
9120	4972.57	1	0	1	0	0	0	0.0122424
9122	4972.61	1	0	1	0	0	0	0.0122069
9124	4972.64	1	0	1	0	0	0	0.0122152
9126	4972.67	1	0	1	0	0	0	0.012225
9128	4972.71	1	0	1	0	0	0	0.0122602
9130	4972.74	1	0	1	0	0	0	0.0121915
9132	4972.77	1	0	1	0	0	0	0.0122048
9134	4972.81	1	0	1	0	0	0	0.0121786
9136	4972.84	1	0	1	0	0	0	0.0121842
9138	4972.87	1	0	1	0	0	0	0.0121755
9140	4972.91	1	0	1	0	0	0	0.0121922
9142	4972.94	1	0	1	0	0	0	0.0121532
9144	4972.97	1	0	1	0	0	0	0.0121347
9146	4973.01	1	0	1	0	0	0	0.0121106
9148	4973.04	1	0	1	0	0	0	0.0121479
9150	4973.07	1	0	1	0	0	0	0.0121277
9152	4973.11	1	0	1	0	0	0	0.0121493
9154	4973.14	1	0	1	0	0	0	0.0120758
9156	4973.17	1	0	1	0	0	0	0.012089
9158	4973.21	1	0	1	0	0	0	0.0121619
9160	4973.24	1	0	1	0	0	0	0.0121448
9162	4973.27	1	0	1	0	0	0	0.0121954
9164	4973.31	1	0	1	0	0	0	0.0121532
9166	4973.34	1	0	1	0	0	0	0.0120956
9168	4973.37	1	0	1	0	0	0	0.0120817
9170	4973.41	1	0	1	0	0	0	0.0121549
9172	4973.44	1	0	1	0	0	0	0.0121755
9174	4973.47	1	0	1	0	0	0	0.0121856
9176	4973.51	1	0	1	0	0	0	0.0120712
9178	4973.54	1	0	1	0	0	0	0.0121232
9180	4973.57	1	0	1	0	0	0	0.0121723
9182	4973.61	1	0	1	0	0	0	0.0121668
9184	4973.64	1	0	1	0	0	0	0.0122187
9186	4973.67	1	0	1	0	0	0	0.0121783
9188	4973.71	1	0	1	0	0	0	0.0121399
9190	4973.74	1	0	1	0	0	0	0.0121608
9192	4973.77	1	0	1	0	0	0	0.0122163
9194	4973.81	1	0	1	0	0	0	0.0122002
9196	4973.84	1	0	1	0	0	0	0.0122358
9198	4973.87	1	0	1	0	0	0	0.0121563
9200	4973.91	1	0	1	0	0	0	0.0121905
9202	4973.94	1	0	1	0	0	0	0.0121696
9204	4973.97	1	0	1	0	0	0	0.012187
9206	4974.01	1	0	1	0	0	0	0.0122271
9208	4974.04	1	0	1	0	0	0	0.0122086
9210	4974.07	1	0	1	0	0	0	0.0122034
9212	4974.11	1	0	1	0	0	0	0.0121584
9214	4974.14	1	0	1	0	0	0	0.0122222
9216	4974.17	1	0	1	0	0	0	0.0121849
9218	4974.21	1	0	1	0	0	0	0.012224
9220	4974.24	1	0	1	0	0	0	0.0122501
9222	4974.27	1	0	1	0	0	0	0.0122027
9224	4974.31	1	0	1	0	0	0	0.0122313
9226	4974.34	1	0	1	0	0	0	0.0121863
9228	4974.37	1	0	1	0	0	0	0.0122177
9230	4974.41	1	0	1	0	0	0	0.0121846
9232	4974.44	1	0	1	0	0	0	0.0121661
9234	4974.47	1	0	1	0	0	0	0.0121622
9236	4974.51	1	0	1	0	0	0	0.0121786
9238	4974.54	1	0	1	0	0	0	0.0122191
9240	4974.57	1	0	1	0	0	0	0.0121378
9242	4974.61	1	0	1	0	0	0	0.0121594
9244	4974.64	1	0	1	0	0	0	0.0122065
9246	4974.67	1	0	1	0	0	0	0.0121842
9248	4974.71	1	0	1	0	0	0	0.012156
9250	4974.74	1	0	1	0	0	0	0.0121758
9252	4974.77	1	0	1	0	0	0	0.012188
9254	4974.81	1	0	1	0	0	0	0.0121567
9256	4974.84	1	0	1	0	0	0	0.0121755
9258	4974.87	1	0	1	0	0	0	0.0121678
9260	4974.91	1	0	1	0	0	0	0.0121009
9262	4974.94	1	0	1	0	0	0	0.012112
9264	4974.97	1	0	1	0	0	0	0.0121333
9266	4975.01	1	0	1	0	0	0	0.0121493
9268	4975.04	1	0	1	0	0	0	0.012172
9270	4975.07	1	0	1	0	0	0	0.0121723
9272	4975.11	1	0	1	0	0	0	0.0121448
9274	4975.14	1	0	1	0	0	0	0.0121375
9276	4975.17	1	0	1	0	0	0	0.0121364
9278	4975.21	1	0	1	0	0	0	0.0121629
9280	4975.24	1	0	1	0	0	0	0.0121308
9282	4975.27	1	0	1	0	0	0	0.0121312
9284	4975.31	1	0	1	0	0	0	0.0120663
9286	4975.34	1	0	1	0	0	0	0.0120583
9288	4975.37	1	0	1	0	0	0	0.0120419
9290	4975.41	1	0	1	0	0	0	0.0120639
9292	4975.44	1	0	1	0	0	0	0.0120852
9294	4975.47	1	0	1	0	0	0	0.0120744
9296	4975.51	1	0	1	0	0	0	0.012074
9298	4975.54	1	0	1	0	0	0	0.0121057
9300	4975.57	1	0	1	0	0	0	0.0121033
9302	4975.61	1	0	1	0	0	0	0.0120838
9304	4975.64	1	0	1	0	0	0	0.012051
9306	4975.67	1	0	1	0	0	0	0.012126
9308	4975.71	1	0	1	0	0	0	0.0121211
9310	4975.74	1	0	1	0	0	0	0.0120901
9312	4975.77	1	0	1	0	0	0	0.0121019
9314	4975.81	1	0	1	0	0	0	0.0121291
9316	4975.84	1	0	1	0	0	0	0.0120995
9318	4975.87	1	0	1	0	0	0	0.0120873
9320	4975.91	1	0	1	0	0	0	0.0119987
9322	4975.94	1	0	1	0	0	0	0.0120374
9324	4975.97	1	0	1	0	0	0	0.0120827
9326	4976.01	1	0	1	0	0	0	0.0120737
9328	4976.04	1	0	1	0	0	0	0.0120723
9330	4976.07	1	0	1	0	0	0	0.0119813
9332	4976.11	1	0	1	0	0	0	0.0120622
9334	4976.14	1	0	1	0	0	0	0.0120189
9336	4976.17	1	0	1	0	0	0	0.0121096
9338	4976.21	1	0	1	0	0	0	0.0120918
9340	4976.24	1	0	1	0	0	0	0.012052
9342	4976.27	1	0	1	0	0	0	0.0119823
9344	4976.31	1	0	1	0	0	0	0.0120078
9346	4976.34	1	0	1	0	0	0	0.012051
9348	4976.37	1	0	1	0	0	0	0.012082
9350	4976.41	1	0	1	0	0	0	0.0120534
9352	4976.44	1	0	1	0	0	0	0.012089
9354	4976.47	1	0	1	0	0	0	0.0121064
9356	4976.51	1	0	1	0	0	0	0.0120737
9358	4976.54	1	0	1	0	0	0	0.0120234
9360	4976.57	1	0	1	0	0	0	0.0119865
9362	4976.61	1	0	1	0	0	0	0.0120227
9364	4976.64	1	0	1	0	0	0	0.011991
9366	4976.67	1	0	1	0	0	0	0.0120252
9368	4976.71	1	0	1	0	0	0	0.0120426
9370	4976.74	1	0	1	0	0	0	0.0119994
9372	4976.77	1	0	1	0	0	0	0.0119558
9374	4976.81	1	0	1	0	0	0	0.0119694
9376	4976.84	1	0	1	0	0	0	0.0119296
9378	4976.87	1	0	1	0	0	0	0.0119056
9380	4976.91	1	0	1	0	0	0	0.0119115
9382	4976.94	1	0	1	0	0	0	0.0119446
9384	4976.97	1	0	1	0	0	0	0.0119596
9386	4977.01	1	0	1	0	0	0	0.0119021
9388	4977.04	1	0	1	0	0	0	0.0119038
9390	4977.07	1	0	1	0	0	0	0.0119457
9392	4977.11	1	0	1	0	0	0	0.0119052
9394	4977.14	1	0	1	0	0	0	0.0119321
9396	4977.17	1	0	1	0	0	0	0.0118739
9398	4977.21	1	0	1	0	0	0	0.0118885
9400	4977.24	1	0	1	0	0	0	0.0118582
9402	4977.27	1	0	1	0	0	0	0.0119133
9404	4977.31	1	0	1	0	0	0	0.0118916
9406	4977.34	1	0	1	0	0	0	0.0118829
9408	4977.37	1	0	1	0	0	0	0.0118798
9410	4977.41	1	0	1	0	0	0	0.011877
9412	4977.44	1	0	1	0	0	0	0.01187
9414	4977.47	1	0	1	0	0	0	0.0119112
9416	4977.51	1	0	1	0	0	0	0.0118777
9418	4977.54	1	0	1	0	0	0	0.0119237
9420	4977.57	1	0	1	0	0	0	0.0119502
9422	4977.61	1	0	1	0	0	0	0.0119628
9424	4977.64	1	0	1	0	0	0	0.0119554
9426	4977.67	1	0	1	0	0	0	0.0119262
9428	4977.71	1	0	1	0	0	0	0.0119394
9430	4977.74	1	0	1	0	0	0	0.0119091
9432	4977.77	1	0	1	0	0	0	0.0118742
9434	4977.81	1	0	1	0	0	0	0.0118498
9436	4977.84	1	0	1	0	0	0	0.0118899
9438	4977.87	1	0	1	0	0	0	0.011915
9440	4977.91	1	0	1	0	0	0	0.0118934
9442	4977.94	1	0	1	0	0	0	0.011877
9444	4977.97	1	0	1	0	0	0	0.0118927
9446	4978.01	1	0	1	0	0	0	0.0118561
9448	4978.04	1	0	1	0	0	0	0.0118561
9450	4978.07	1	0	1	0	0	0	0.011846
9452	4978.11	1	0	1	0	0	0	0.0118721
9454	4978.14	1	0	1	0	0	0	0.0119241
9456	4978.17	1	0	1	0	0	0	0.0118976
9458	4978.21	1	0	1	0	0	0	0.0118875
9460	4978.24	1	0	1	0	0	0	0.0118728
9462	4978.27	1	0	1	0	0	0	0.0118243
9464	4978.31	1	0	1	0	0	0	0.0118732
9466	4978.34	1	0	1	0	0	0	0.0118658
9468	4978.37	1	0	1	0	0	0	0.0118414
9470	4978.41	1	0	1	0	0	0	0.0118641
9472	4978.44	1	0	1	0	0	0	0.0118257
9474	4978.47	1	0	1	0	0	0	0.0118477
9476	4978.51	1	0	1	0	0	0	0.0118644
9478	4978.54	1	0	1	0	0	0	0.0118449
9480	4978.57	1	0	1	0	0	0	0.0118972
9482	4978.61	1	0	1	0	0	0	0.0118596
9484	4978.64	1	0	1	0	0	0	0.0118432
9486	4978.67	1	0	1	0	0	0	0.0118383
9488	4978.71	1	0	1	0	0	0	0.0118282
9490	4978.74	1	0	1	0	0	0	0.0117787
9492	4978.77	1	0	1	0	0	0	0.0117971
9494	4978.81	1	0	1	0	0	0	0.0118003
9496	4978.84	1	0	1	0	0	0	0.0117518
9498	4978.87	1	0	1	0	0	0	0.0117222
9500	4978.91	1	0	1	0	0	0	0.0117079
9502	4978.94	1	0	1	0	0	0	0.0117316
9504	4978.97	1	0	1	0	0	0	0.0117187
9506	4979.01	1	0	1	0	0	0	0.0117169
9508	4979.04	1	0	1	0	0	0	0.0117368
9510	4979.07	1	0	1	0	0	0	0.0116894
9512	4979.11	1	0	1	0	0	0	0.0117298
9514	4979.14	1	0	1	0	0	0	0.0116831
9516	4979.17	1	0	1	0	0	0	0.0116594
9518	4979.21	1	0	1	0	0	0	0.0116713
9520	4979.24	1	0	1	0	0	0	0.0116636
9522	4979.27	1	0	1	0	0	0	0.0116329
9524	4979.31	1	0	1	0	0	0	0.0115879
9526	4979.34	1	0	1	0	0	0	0.0115743
9528	4979.37	1	0	1	0	0	0	0.0115722
9530	4979.41	1	0	1	0	0	0	0.0115921
9532	4979.44	1	0	1	0	0	0	0.0115984
9534	4979.47	1	0	1	0	0	0	0.0115286
9536	4979.51	1	0	1	0	0	0	0.0115203
9538	4979.54	1	0	1	0	0	0	0.0115541
9540	4979.57	1	0	1	0	0	0	0.0115321
9542	4979.61	1	0	1	0	0	0	0.0115262
9544	4979.64	1	0	1	0	0	0	0.0114959
9546	4979.67	1	0	1	0	0	0	0.011491
9548	4979.71	1	0	1	0	0	0	0.0115558
9550	4979.74	1	0	1	0	0	0	0.0115412
9552	4979.77	1	0	1	0	0	0	0.0115206
9554	4979.81	1	0	1	0	0	0	0.0115666
9556	4979.84	1	0	1	0	0	0	0.0115893
9558	4979.87	1	0	1	0	0	0	0.0117776
9560	4979.91	1	0	1	0	0	0	0.0118449
9562	4979.94	1	0	1	0	0	0	0.0119949
9564	4979.97	1	0	1	0	0	0	0.0120154
9566	4980.01	1	0	1	0	0	0	0.0119314
9568	4980.04	1	0	1	0	0	0	0.0119255
9570	4980.07	1	0	1	0	0	0	0.0118756
9572	4980.11	1	0	1	0	0	0	0.0119077
9574	4980.14	1	0	1	0	0	0	0.0119143
9576	4980.17	1	0	1	0	0	0	0.0118435
9578	4980.21	1	0	1	0	0	0	0.011863
9580	4980.24	1	0	1	0	0	0	0.0119223
9582	4980.27	1	0	1	0	0	0	0.0119718
9584	4980.31	1	0	1	0	0	0	0.0120541
9586	4980.34	1	0	1	0	0	0	0.0121235
9588	4980.37	1	0	1	0	0	0	0.0121092
9590	4980.41	1	0	1	0	0	0	0.0121263
9592	4980.44	1	0	1	0	0	0	0.0120765
9594	4980.47	1	0	1	0	0	0	0.0121186
9596	4980.51	1	0	1	0	0	0	0.0121078
9598	4980.54	1	0	1	0	0	0	0.0120894
9600	4980.57	1	0	1	0	0	0	0.0121267
9602	4980.61	1	0	1	0	0	0	0.0120737
9604	4980.64	1	0	1	0	0	0	0.0120751
9606	4980.67	1	0	1	0	0	0	0.0121131
9608	4980.71	1	0	1	0	0	0	0.0121385
9610	4980.74	1	0	1	0	0	0	0.0121375
9612	4980.77	1	0	1	0	0	0	0.0120977
9614	4980.81	1	0	1	0	0	0	0.0121057
9616	4980.84	1	0	1	0	0	0	0.0120799
9618	4980.87	1	0	1	0	0	0	0.0121186
9620	4980.91	1	0	1	0	0	0	0.012103
9622	4980.94	1	0	1	0	0	0	0.012096
9624	4980.97	1	0	1	0	0	0	0.0120597
9626	4981.01	1	0	1	0	0	0	0.0121225
9628	4981.04	1	0	1	0	0	0	0.0120848
9630	4981.07	1	0	1	0	0	0	0.0121089
9632	4981.11	1	0	1	0	0	0	0.0121587
9634	4981.14	1	0	1	0	0	0	0.0121274
9636	4981.17	1	0	1	0	0	0	0.0121326
9638	4981.21	1	0	1	0	0	0	0.0121127
9640	4981.24	1	0	1	0	0	0	0.0121319
9642	4981.27	1	0	1	0	0	0	0.0121553
9644	4981.31	1	0	1	0	0	0	0.0121567
9646	4981.34	1	0	1	0	0	0	0.0122152
9648	4981.37	1	0	1	0	0	0	0.012142
9650	4981.41	1	0	1	0	0	0	0.0121207
9652	4981.44	1	0	1	0	0	0	0.012172
9654	4981.47	1	0	1	0	0	0	0.0121542
9656	4981.51	1	0	1	0	0	0	0.0121587
9658	4981.54	1	0	1	0	0	0	0.0121591
9660	4981.57	1	0	1	0	0	0	0.0121371
9662	4981.61	1	0	1	0	0	0	0.0121804
9664	4981.64	1	0	1	0	0	0	0.0121483
9666	4981.67	1	0	1	0	0	0	0.0122006
9668	4981.71	1	0	1	0	0	0	0.0121891
9670	4981.74	1	0	1	0	0	0	0.0122002
9672	4981.77	1	0	1	0	0	0	0.0121856
9674	4981.81	1	0	1	0	0	0	0.0121685
9676	4981.84	1	0	1	0	0	0	0.0121563
9678	4981.87	1	0	1	0	0	0	0.012195
9680	4981.91	1	0	1	0	0	0	0.0121507
9682	4981.94	1	0	1	0	0	0	0.0121758
9684	4981.97	1	0	1	0	0	0	0.0121654
9686	4982.01	1	0	1	0	0	0	0.0121389
9688	4982.04	1	0	1	0	0	0	0.0121929
9690	4982.07	1	0	1	0	0	0	0.0121748
9692	4982.11	1	0	1	0	0	0	0.0121598
9694	4982.14	1	0	1	0	0	0	0.0121406
9696	4982.17	1	0	1	0	0	0	0.0120883
9698	4982.21	1	0	1	0	0	0	0.0120799
9700	4982.24	1	0	1	0	0	0	0.0120705
9702	4982.27	1	0	1	0	0	0	0.012066
9704	4982.31	1	0	1	0	0	0	0.0120154
9706	4982.34	1	0	1	0	0	0	0.0120611
9708	4982.37	1	0	1	0	0	0	0.0120799
9710	4982.41	1	0	1	0	0	0	0.012081
9712	4982.44	1	0	1	0	0	0	0.0121361
9714	4982.47	1	0	1	0	0	0	0.012173
9716	4982.51	1	0	1	0	0	0	0.0122107
9718	4982.54	1	0	1	0	0	0	0.0122274
9720	4982.57	1	0	1	0	0	0	0.0122048
9722	4982.61	1	0	1	0	0	0	0.0122341
9724	4982.64	1	0	1	0	0	0	0.0121898
9726	4982.67	1	0	1	0	0	0	0.0122233
9728	4982.71	1	0	1	0	0	0	0.0121943
9730	4982.74	1	0	1	0	0	0	0.0121908
9732	4982.77	1	0	1	0	0	0	0.0121783
9734	4982.81	1	0	1	0	0	0	0.0121999
9736	4982.84	1	0	1	0	0	0	0.0122271
9738	4982.87	1	0	1	0	0	0	0.012187
9740	4982.91	1	0	1	0	0	0	0.0121744
9742	4982.94	1	0	1	0	0	0	0.012172
9744	4982.97	1	0	1	0	0	0	0.0121856
9746	4983.01	1	0	1	0	0	0	0.0121528
9748	4983.04	1	0	1	0	0	0	0.0121852
9750	4983.07	1	0	1	0	0	0	0.0121465
9752	4983.11	1	0	1	0	0	0	0.0121825
9754	4983.14	1	0	1	0	0	0	0.0121943
9756	4983.17	1	0	1	0	0	0	0.012171
9758	4983.21	1	0	1	0	0	0	0.0121776
9760	4983.24	1	0	1	0	0	0	0.0121636
9762	4983.27	1	0	1	0	0	0	0.0121378
9764	4983.31	1	0	1	0	0	0	0.0121779
9766	4983.34	1	0	1	0	0	0	0.0121476
9768	4983.37	1	0	1	0	0	0	0.0121594
9770	4983.41	1	0	1	0	0	0	0.012194
9772	4983.44	1	0	1	0	0	0	0.0121476
9774	4983.47	1	0	1	0	0	0	0.0121898
9776	4983.51	1	0	1	0	0	0	0.0122121
9778	4983.54	1	0	1	0	0	0	0.0121668
9780	4983.57	1	0	1	0	0	0	0.0121591
9782	4983.61	1	0	1	0	0	0	0.0122124
9784	4983.64	1	0	1	0	0	0	0.0122145
9786	4983.67	1	0	1	0	0	0	0.0121908
9788	4983.71	1	0	1	0	0	0	0.0122107
9790	4983.74	1	0	1	0	0	0	0.0122226
9792	4983.77	1	0	1	0	0	0	0.012195
9794	4983.81	1	0	1	0	0	0	0.0122424
9796	4983.84	1	0	1	0	0	0	0.0121713
9798	4983.87	1	0	1	0	0	0	0.0121971
9800	4983.91	1	0	1	0	0	0	0.0122009
9802	4983.94	1	0	1	0	0	0	0.0122362
9804	4983.97	1	0	1	0	0	0	0.0122665
9806	4984.01	1	0	1	0	0	0	0.0121905
9808	4984.04	1	0	1	0	0	0	0.0122079
9810	4984.07	1	0	1	0	0	0	0.0122267
9812	4984.11	1	0	1	0	0	0	0.0122274
9814	4984.14	1	0	1	0	0	0	0.0122745
9816	4984.17	1	0	1	0	0	0	0.0122804
9818	4984.21	1	0	1	0	0	0	0.0122281
9820	4984.24	1	0	1	0	0	0	0.0122351
9822	4984.27	1	0	1	0	0	0	0.012256
9824	4984.31	1	0	1	0	0	0	0.0122731
9826	4984.34	1	0	1	0	0	0	0.012277
9828	4984.37	1	0	1	0	0	0	0.0123132
9830	4984.41	1	0	1	0	0	0	0.012293
9832	4984.44	1	0	1	0	0	0	0.0122313
9834	4984.47	1	0	1	0	0	0	0.0122553
9836	4984.51	1	0	1	0	0	0	0.0122201
9838	4984.54	1	0	1	0	0	0	0.0122832
9840	4984.57	1	0	1	0	0	0	0.0122672
9842	4984.61	1	0	1	0	0	0	0.0122822
9844	4984.64	1	0	1	0	0	0	0.0122138
9846	4984.67	1	0	1	0	0	0	0.0122975
9848	4984.71	1	0	1	0	0	0	0.0122386
9850	4984.74	1	0	1	0	0	0	0.0123007
9852	4984.77	1	0	1	0	0	0	0.0122396
9854	4984.81	1	0	1	0	0	0	0.0123195
9856	4984.84	1	0	1	0	0	0	0.0122616
9858	4984.87	1	0	1	0	0	0	0.0122738
9860	4984.91	1	0	1	0	0	0	0.012271
9862	4984.94	1	0	1	0	0	0	0.0122787
9864	4984.97	1	0	1	0	0	0	0.0122505
9866	4985.01	1	0	1	0	0	0	0.012262
9868	4985.04	1	0	1	0	0	0	0.0122543
9870	4985.07	1	0	1	0	0	0	0.0123003
9872	4985.11	1	0	1	0	0	0	0.0122787
9874	4985.14	1	0	1	0	0	0	0.0122634
9876	4985.17	1	0	1	0	0	0	0.0122696
9878	4985.21	1	0	1	0	0	0	0.0122968
9880	4985.24	1	0	1	0	0	0	0.0122993
9882	4985.27	1	0	1	0	0	0	0.0123205
9884	4985.31	1	0	1	0	0	0	0.0122878
9886	4985.34	1	0	1	0	0	0	0.012316
9888	4985.37	1	0	1	0	0	0	0.0123136
9890	4985.41	1	0	1	0	0	0	0.0122843
9892	4985.44	1	0	1	0	0	0	0.0122909
9894	4985.47	1	0	1	0	0	0	0.012217
9896	4985.51	1	0	1	0	0	0	0.0122801
9898	4985.54	1	0	1	0	0	0	0.0122794
9900	4985.57	1	0	1	0	0	0	0.0122602
9902	4985.61	1	0	1	0	0	0	0.0122794
9904	4985.64	1	0	1	0	0	0	0.0122902
9906	4985.67	1	0	1	0	0	0	0.0122302
9908	4985.71	1	0	1	0	0	0	0.0122693
9910	4985.74	1	0	1	0	0	0	0.012248
9912	4985.77	1	0	1	0	0	0	0.0121839
9914	4985.81	1	0	1	0	0	0	0.0122539
9916	4985.84	1	0	1	0	0	0	0.012256
9918	4985.87	1	0	1	0	0	0	0.0122117
9920	4985.91	1	0	1	0	0	0	0.0121961
9922	4985.94	1	0	1	0	0	0	0.0122156
9924	4985.97	1	0	1	0	0	0	0.0122145
9926	4986.01	1	0	1	0	0	0	0.0122487
9928	4986.04	1	0	1	0	0	0	0.0122508
9930	4986.07	1	0	1	0	0	0	0.0122362
9932	4986.11	1	0	1	0	0	0	0.0122445
9934	4986.14	1	0	1	0	0	0	0.0122226
9936	4986.17	1	0	1	0	0	0	0.0122009
9938	4986.21	1	0	1	0	0	0	0.0122044
9940	4986.24	1	0	1	0	0	0	0.0122599
9942	4986.27	1	0	1	0	0	0	0.0122407
9944	4986.31	1	0	1	0	0	0	0.0122396
9946	4986.34	1	0	1	0	0	0	0.0122574
9948	4986.37	1	0	1	0	0	0	0.0122076
9950	4986.41	1	0	1	0	0	0	0.0122515
9952	4986.44	1	0	1	0	0	0	0.0122369
9954	4986.47	1	0	1	0	0	0	0.0122494
9956	4986.51	1	0	1	0	0	0	0.0122435
9958	4986.54	1	0	1	0	0	0	0.0122219
9960	4986.57	1	0	1	0	0	0	0.0121849
9962	4986.61	1	0	1	0	0	0	0.0121954
9964	4986.64	1	0	1	0	0	0	0.0121828
9966	4986.67	1	0	1	0	0	0	0.0122201
9968	4986.71	1	0	1	0	0	0	0.0122508
9970	4986.74	1	0	1	0	0	0	0.0122055
9972	4986.77	1	0	1	0	0	0	0.0122027
9974	4986.81	1	0	1	0	0	0	0.012202
9976	4986.84	1	0	1	0	0	0	0.0121553
9978	4986.87	1	0	1	0	0	0	0.0121546
9980	4986.91	1	0	1	0	0	0	0.0121696
9982	4986.94	1	0	1	0	0	0	0.0121591
9984	4986.97	1	0	1	0	0	0	0.0121479
9986	4987.01	1	0	1	0	0	0	0.012165
9988	4987.04	1	0	1	0	0	0	0.0121668
9990	4987.07	1	0	1	0	0	0	0.0121612
9992	4987.11	1	0	1	0	0	0	0.0122226
9994	4987.14	1	0	1	0	0	0	0.0121375
9996	4987.17	1	0	1	0	0	0	0.0121417
9998	4987.21	1	0	1	0	0	0	0.0122086
10000	4987.24	1	0	1	0	0	0	0.0121577
10002	4987.27	1	0	1	0	0	0	0.0121765
10004	4987.31	1	0	1	0	0	0	0.0121821
10006	4987.34	1	0	1	0	0	0	0.0121444
10008	4987.37	1	0	1	0	0	0	0.0122013
10010	4987.41	1	0	1	0	0	0	0.0122271
10012	4987.44	1	0	1	0	0	0	0.0121633
10014	4987.47	1	0	1	0	0	0	0.0122159
10016	4987.51	1	0	1	0	0	0	0.0121985
10018	4987.54	1	0	1	0	0	0	0.0121444
10020	4987.57	1	0	1	0	0	0	0.0122281
10022	4987.61	1	0	1	0	0	0	0.0121995
10024	4987.64	1	0	1	0	0	0	0.0121727
10026	4987.67	1	0	1	0	0	0	0.0121532
10028	4987.71	1	0	1	0	0	0	0.0121504
10030	4987.74	1	0	1	0	0	0	0.0122058
10032	4987.77	1	0	1	0	0	0	0.0121762
10034	4987.81	1	0	1	0	0	0	0.0121786
10036	4987.84	1	0	1	0	0	0	0.0121908
10038	4987.87	1	0	1	0	0	0	0.0122006
10040	4987.91	1	0	1	0	0	0	0.0121919
10042	4987.94	1	0	1	0	0	0	0.0122016
10044	4987.97	1	0	1	0	0	0	0.0122065
10046	4988.01	1	0	1	0	0	0	0.0121744
10048	4988.04	1	0	1	0	0	0	0.012187
10050	4988.07	1	0	1	0	0	0	0.0122117
10052	4988.11	1	0	1	0	0	0	0.0122292
10054	4988.14	1	0	1	0	0	0	0.012232
10056	4988.17	1	0	1	0	0	0	0.0122285
10058	4988.21	1	0	1	0	0	0	0.0122117
10060	4988.24	1	0	1	0	0	0	0.0122205
10062	4988.27	1	0	1	0	0	0	0.0122264
10064	4988.31	1	0	1	0	0	0	0.0122002
10066	4988.34	1	0	1	0	0	0	0.012187
10068	4988.37	1	0	1	0	0	0	0.0122173
10070	4988.41	1	0	1	0	0	0	0.0122027
10072	4988.44	1	0	1	0	0	0	0.0122166
10074	4988.47	1	0	1	0	0	0	0.0121811
10076	4988.51	1	0	1	0	0	0	0.0121741
10078	4988.54	1	0	1	0	0	0	0.0122041
10080	4988.57	1	0	1	0	0	0	0.0122505
10082	4988.61	1	0	1	0	0	0	0.0121689
10084	4988.64	1	0	1	0	0	0	0.0122065
10086	4988.67	1	0	1	0	0	0	0.0122327
10088	4988.71	1	0	1	0	0	0	0.0121999
10090	4988.74	1	0	1	0	0	0	0.0121961
10092	4988.77	1	0	1	0	0	0	0.0121797
10094	4988.81	1	0	1	0	0	0	0.0122173
10096	4988.84	1	0	1	0	0	0	0.0121999
10098	4988.87	1	0	1	0	0	0	0.0122145
10100	4988.91	1	0	1	0	0	0	0.0122002
10102	4988.94	1	0	1	0	0	0	0.0121936
10104	4988.97	1	0	1	0	0	0	0.0122243
10106	4989.01	1	0	1	0	0	0	0.0121968
10108	4989.04	1	0	1	0	0	0	0.0122376
10110	4989.07	1	0	1	0	0	0	0.0121887
10112	4989.11	1	0	1	0	0	0	0.0121699
10114	4989.14	1	0	1	0	0	0	0.012165
10116	4989.17	1	0	1	0	0	0	0.0121999
10118	4989.21	1	0	1	0	0	0	0.0121664
10120	4989.24	1	0	1	0	0	0	0.0122027
10122	4989.27	1	0	1	0	0	0	0.012187
10124	4989.31	1	0	1	0	0	0	0.0121605
10126	4989.34	1	0	1	0	0	0	0.0121737
10128	4989.37	1	0	1	0	0	0	0.0121947
10130	4989.41	1	0	1	0	0	0	0.0122002
10132	4989.44	1	0	1	0	0	0	0.0121678
10134	4989.47	1	0	1	0	0	0	0.0121713
10136	4989.51	1	0	1	0	0	0	0.0121734
10138	4989.54	1	0	1	0	0	0	0.0121961
10140	4989.57	1	0	1	0	0	0	0.0121619
10142	4989.61	1	0	1	0	0	0	0.012194
10144	4989.64	1	0	1	0	0	0	0.0121326
10146	4989.67	1	0	1	0	0	0	0.0121577
10148	4989.71	1	0	1	0	0	0	0.0121382
10150	4989.74	1	0	1	0	0	0	0.0121748
10152	4989.77	1	0	1	0	0	0	0.012141
10154	4989.81	1	0	1	0	0	0	0.0121636
10156	4989.84	1	0	1	0	0	0	0.0121661
10158	4989.87	1	0	1	0	0	0	0.0121619
10160	4989.91	1	0	1	0	0	0	0.0121033
10162	4989.94	1	0	1	0	0	0	0.012112
10164	4989.97	1	0	1	0	0	0	0.0121221
10166	4990.01	1	0	1	0	0	0	0.0121138
10168	4990.04	1	0	1	0	0	0	0.0121124
10170	4990.07	1	0	1	0	0	0	0.0121235
10172	4990.11	1	0	1	0	0	0	0.0121302
10174	4990.14	1	0	1	0	0	0	0.012164
10176	4990.17	1	0	1	0	0	0	0.0121462
10178	4990.21	1	0	1	0	0	0	0.0121403
10180	4990.24	1	0	1	0	0	0	0.0121486
10182	4990.27	1	0	1	0	0	0	0.0121647
10184	4990.31	1	0	1	0	0	0	0.0122313
10186	4990.34	1	0	1	0	0	0	0.0121811
10188	4990.37	1	0	1	0	0	0	0.0121643
10190	4990.41	1	0	1	0	0	0	0.0122149
10192	4990.44	1	0	1	0	0	0	0.0121668
10194	4990.47	1	0	1	0	0	0	0.0122149
10196	4990.51	1	0	1	0	0	0	0.0121664
10198	4990.54	1	0	1	0	0	0	0.0121905
10200	4990.57	1	0	1	0	0	0	0.0122278
10202	4990.61	1	0	1	0	0	0	0.0121654
10204	4990.64	1	0	1	0	0	0	0.0121971
10206	4990.67	1	0	1	0	0	0	0.0121713
10208	4990.71	1	0	1	0	0	0	0.0121744
10210	4990.74	1	0	1	0	0	0	0.0121995
10212	4990.77	1	0	1	0	0	0	0.0121877
10214	4990.81	1	0	1	0	0	0	0.0121985
10216	4990.84	1	0	1	0	0	0	0.0121716
10218	4990.87	1	0	1	0	0	0	0.0121975
10220	4990.91	1	0	1	0	0	0	0.0121985
10222	4990.94	1	0	1	0	0	0	0.0121619
10224	4990.97	1	0	1	0	0	0	0.0122163
10226	4991.01	1	0	1	0	0	0	0.0122128
10228	4991.04	1	0	1	0	0	0	0.0122016
10230	4991.07	1	0	1	0	0	0	0.0122117
10232	4991.11	1	0	1	0	0	0	0.0121919
10234	4991.14	1	0	1	0	0	0	0.0121671
10236	4991.17	1	0	1	0	0	0	0.0121999
10238	4991.21	1	0	1	0	0	0	0.0121486
10240	4991.24	1	0	1	0	0	0	0.0121933
10242	4991.27	1	0	1	0	0	0	0.0121685
10244	4991.31	1	0	1	0	0	0	0.0121999
10246	4991.34	1	0	1	0	0	0	0.012195
10248	4991.37	1	0	1	0	0	0	0.0121971
10250	4991.41	1	0	1	0	0	0	0.0122086
10252	4991.44	1	0	1	0	0	0	0.0122194
10254	4991.47	1	0	1	0	0	0	0.0121716
10256	4991.51	1	0	1	0	0	0	0.0122536
10258	4991.54	1	0	1	0	0	0	0.012224
10260	4991.57	1	0	1	0	0	0	0.0122403
10262	4991.61	1	0	1	0	0	0	0.0122271
10264	4991.64	1	0	1	0	0	0	0.0121915
10266	4991.67	1	0	1	0	0	0	0.0122288
10268	4991.71	1	0	1	0	0	0	0.0122302
10270	4991.74	1	0	1	0	0	0	0.0122613
10272	4991.77	1	0	1	0	0	0	0.0122121
10274	4991.81	1	0	1	0	0	0	0.0122243
10276	4991.84	1	0	1	0	0	0	0.0122041
10278	4991.87	1	0	1	0	0	0	0.0122194
10280	4991.91	1	0	1	0	0	0	0.0121887
10282	4991.94	1	0	1	0	0	0	0.0121919
10284	4991.97	1	0	1	0	0	0	0.0122606
10286	4992.01	1	0	1	0	0	0	0.0122393
10288	4992.04	1	0	1	0	0	0	0.0122274
10290	4992.07	1	0	1	0	0	0	0.0122459
10292	4992.11	1	0	1	0	0	0	0.01227
10294	4992.14	1	0	1	0	0	0	0.0122379
10296	4992.17	1	0	1	0	0	0	0.0122724
10298	4992.21	1	0	1	0	0	0	0.012225
10300	4992.24	1	0	1	0	0	0	0.0122383
10302	4992.27	1	0	1	0	0	0	0.0122529
10304	4992.31	1	0	1	0	0	0	0.0122072
10306	4992.34	1	0	1	0	0	0	0.0122494
10308	4992.37	1	0	1	0	0	0	0.0122728
10310	4992.41	1	0	1	0	0	0	0.0121901
10312	4992.44	1	0	1	0	0	0	0.0121981
10314	4992.47	1	0	1	0	0	0	0.0122041
10316	4992.51	1	0	1	0	0	0	0.0122055
10318	4992.54	1	0	1	0	0	0	0.0122107
10320	4992.57	1	0	1	0	0	0	0.0122097
10322	4992.61	1	0	1	0	0	0	0.0121898
10324	4992.64	1	0	1	0	0	0	0.0122027
10326	4992.67	1	0	1	0	0	0	0.0121947
10328	4992.71	1	0	1	0	0	0	0.0121964
10330	4992.74	1	0	1	0	0	0	0.0121675
10332	4992.77	1	0	1	0	0	0	0.012156
10334	4992.81	1	0	1	0	0	0	0.0121532
10336	4992.84	1	0	1	0	0	0	0.0121403
10338	4992.87	1	0	1	0	0	0	0.0121472
10340	4992.91	1	0	1	0	0	0	0.0120949
10342	4992.94	1	0	1	0	0	0	0.0121622
10344	4992.97	1	0	1	0	0	0	0.0121692
10346	4993.01	1	0	1	0	0	0	0.0121633
10348	4993.04	1	0	1	0	0	0	0.0121434
10350	4993.07	1	0	1	0	0	0	0.0121811
10352	4993.11	1	0	1	0	0	0	0.0121458
10354	4993.14	1	0	1	0	0	0	0.0121472
10356	4993.17	1	0	1	0	0	0	0.0122278
10358	4993.21	1	0	1	0	0	0	0.0122107
10360	4993.24	1	0	1	0	0	0	0.0121682
10362	4993.27	1	0	1	0	0	0	0.0121835
10364	4993.31	1	0	1	0	0	0	0.0122023
10366	4993.34	1	0	1	0	0	0	0.0121479
10368	4993.37	1	0	1	0	0	0	0.0121675
10370	4993.41	1	0	1	0	0	0	0.0122023
10372	4993.44	1	0	1	0	0	0	0.0122076
10374	4993.47	1	0	1	0	0	0	0.0122145
10376	4993.51	1	0	1	0	0	0	0.0121992
10378	4993.54	1	0	1	0	0	0	0.0122016
10380	4993.57	1	0	1	0	0	0	0.0121528
10382	4993.61	1	0	1	0	0	0	0.0121685
10384	4993.64	1	0	1	0	0	0	0.0121734
10386	4993.67	1	0	1	0	0	0	0.012157
10388	4993.71	1	0	1	0	0	0	0.0122097
10390	4993.74	1	0	1	0	0	0	0.0121703
10392	4993.77	1	0	1	0	0	0	0.0121361
10394	4993.81	1	0	1	0	0	0	0.0121807
10396	4993.84	1	0	1	0	0	0	0.0121256
10398	4993.87	1	0	1	0	0	0	0.0121689
10400	4993.91	1	0	1	0	0	0	0.0121389
10402	4993.94	1	0	1	0	0	0	0.0122027
10404	4993.97	1	0	1	0	0	0	0.0121723
10406	4994.01	1	0	1	0	0	0	0.01215
10408	4994.04	1	0	1	0	0	0	0.0121553
10410	4994.07	1	0	1	0	0	0	0.0121308
10412	4994.11	1	0	1	0	0	0	0.012112
10414	4994.14	1	0	1	0	0	0	0.0121978
10416	4994.17	1	0	1	0	0	0	0.012164
10418	4994.21	1	0	1	0	0	0	0.0120946
10420	4994.24	1	0	1	0	0	0	0.0121253
10422	4994.27	1	0	1	0	0	0	0.0121396
10424	4994.31	1	0	1	0	0	0	0.0121277
10426	4994.34	1	0	1	0	0	0	0.0121622
10428	4994.37	1	0	1	0	0	0	0.0121434
10430	4994.41	1	0	1	0	0	0	0.012142
10432	4994.44	1	0	1	0	0	0	0.0121912
10434	4994.47	1	0	1	0	0	0	0.0121647
10436	4994.51	1	0	1	0	0	0	0.0121302
10438	4994.54	1	0	1	0	0	0	0.0121417
10440	4994.57	1	0	1	0	0	0	0.0121682
10442	4994.61	1	0	1	0	0	0	0.0121319
10444	4994.64	1	0	1	0	0	0	0.0121319
10446	4994.67	1	0	1	0	0	0	0.012142
10448	4994.71	1	0	1	0	0	0	0.012135
10450	4994.74	1	0	1	0	0	0	0.0121807
10452	4994.77	1	0	1	0	0	0	0.0121633
10454	4994.81	1	0	1	0	0	0	0.0121221
10456	4994.84	1	0	1	0	0	0	0.01212
10458	4994.87	1	0	1	0	0	0	0.0121626
10460	4994.91	1	0	1	0	0	0	0.012187
10462	4994.94	1	0	1	0	0	0	0.0121863
10464	4994.97	1	0	1	0	0	0	0.0121647
10466	4995.01	1	0	1	0	0	0	0.0121671
10468	4995.04	1	0	1	0	0	0	0.0121758
10470	4995.07	1	0	1	0	0	0	0.0121469
10472	4995.11	1	0	1	0	0	0	0.0121661
10474	4995.14	1	0	1	0	0	0	0.0121378
10476	4995.17	1	0	1	0	0	0	0.0121124
10478	4995.21	1	0	1	0	0	0	0.012088
10480	4995.24	1	0	1	0	0	0	0.0121064
10482	4995.27	1	0	1	0	0	0	0.0120953
10484	4995.31	1	0	1	0	0	0	0.012096
10486	4995.34	1	0	1	0	0	0	0.0120974
10488	4995.37	1	0	1	0	0	0	0.0121225
10490	4995.41	1	0	1	0	0	0	0.0120608
10492	4995.44	1	0	1	0	0	0	0.0120332
10494	4995.47	1	0	1	0	0	0	0.0121197
10496	4995.51	1	0	1	0	0	0	0.0121023
10498	4995.54	1	0	1	0	0	0	0.0121183
10500	4995.57	1	0	1	0	0	0	0.0121204
10502	4995.61	1	0	1	0	0	0	0.0121068
10504	4995.64	1	0	1	0	0	0	0.0120702
10506	4995.67	1	0	1	0	0	0	0.0120869
10508	4995.71	1	0	1	0	0	0	0.0121159
10510	4995.74	1	0	1	0	0	0	0.0121556
10512	4995.77	1	0	1	0	0	0	0.0121228
10514	4995.81	1	0	1	0	0	0	0.0121096
10516	4995.84	1	0	1	0	0	0	0.0120887
10518	4995.87	1	0	1	0	0	0	0.0120583
10520	4995.91	1	0	1	0	0	0	0.0121535
10522	4995.94	1	0	1	0	0	0	0.0120984
10524	4995.97	1	0	1	0	0	0	0.0121176
10526	4996.01	1	0	1	0	0	0	0.0120869
10528	4996.04	1	0	1	0	0	0	0.0121221
10530	4996.07	1	0	1	0	0	0	0.0120799
10532	4996.11	1	0	1	0	0	0	0.0121375
10534	4996.14	1	0	1	0	0	0	0.0120782
10536	4996.17	1	0	1	0	0	0	0.0121148
10538	4996.21	1	0	1	0	0	0	0.0121186
10540	4996.24	1	0	1	0	0	0	0.0121225
10542	4996.27	1	0	1	0	0	0	0.0121221
10544	4996.31	1	0	1	0	0	0	0.0121138
10546	4996.34	1	0	1	0	0	0	0.0120887
10548	4996.37	1	0	1	0	0	0	0.0121026
10550	4996.41	1	0	1	0	0	0	0.0120841
10552	4996.44	1	0	1	0	0	0	0.0120848
10554	4996.47	1	0	1	0	0	0	0.0120597
10556	4996.51	1	0	1	0	0	0	0.0120803
10558	4996.54	1	0	1	0	0	0	0.0120695
10560	4996.57	1	0	1	0	0	0	0.0120754
10562	4996.61	1	0	1	0	0	0	0.0120883
10564	4996.64	1	0	1	0	0	0	0.0120458
10566	4996.67	1	0	1	0	0	0	0.0120493
10568	4996.71	1	0	1	0	0	0	0.0120775
10570	4996.74	1	0	1	0	0	0	0.0120587
10572	4996.77	1	0	1	0	0	0	0.0120775
10574	4996.81	1	0	1	0	0	0	0.0120468
10576	4996.84	1	0	1	0	0	0	0.0120845
10578	4996.87	1	0	1	0	0	0	0.0120775
10580	4996.91	1	0	1	0	0	0	0.0120848
10582	4996.94	1	0	1	0	0	0	0.012067
10584	4996.97	1	0	1	0	0	0	0.0120573
10586	4997.01	1	0	1	0	0	0	0.0120688
10588	4997.04	1	0	1	0	0	0	0.0120991
10590	4997.07	1	0	1	0	0	0	0.0121016
10592	4997.11	1	0	1	0	0	0	0.0120486
10594	4997.14	1	0	1	0	0	0	0.0120901
10596	4997.17	1	0	1	0	0	0	0.0120806
10598	4997.21	1	0	1	0	0	0	0.0120792
10600	4997.24	1	0	1	0	0	0	0.0120859
10602	4997.27	1	0	1	0	0	0	0.0120576
10604	4997.31	1	0	1	0	0	0	0.0120831
10606	4997.34	1	0	1	0	0	0	0.0120649
10608	4997.37	1	0	1	0	0	0	0.0120709
10610	4997.41	1	0	1	0	0	0	0.012051
10612	4997.44	1	0	1	0	0	0	0.0121078
10614	4997.47	1	0	1	0	0	0	0.0121127
10616	4997.51	1	0	1	0	0	0	0.0120737
10618	4997.54	1	0	1	0	0	0	0.0120723
10620	4997.57	1	0	1	0	0	0	0.0121249
10622	4997.61	1	0	1	0	0	0	0.0120845
10624	4997.64	1	0	1	0	0	0	0.0120974
10626	4997.67	1	0	1	0	0	0	0.0120988
10628	4997.71	1	0	1	0	0	0	0.0121357
10630	4997.74	1	0	1	0	0	0	0.0120928
10632	4997.77	1	0	1	0	0	0	0.0121486
10634	4997.81	1	0	1	0	0	0	0.0121476
10636	4997.84	1	0	1	0	0	0	0.0121574
10638	4997.87	1	0	1	0	0	0	0.0121159
10640	4997.91	1	0	1	0	0	0	0.0121183
10642	4997.94	1	0	1	0	0	0	0.0121493
10644	4997.97	1	0	1	0	0	0	0.0121183
10646	4998.01	1	0	1	0	0	0	0.0121221
10648	4998.04	1	0	1	0	0	0	0.0121012
10650	4998.07	1	0	1	0	0	0	0.0120751
10652	4998.11	1	0	1	0	0	0	0.0120914
10654	4998.14	1	0	1	0	0	0	0.0120768
10656	4998.17	1	0	1	0	0	0	0.0120447
10658	4998.21	1	0	1	0	0	0	0.0120768
10660	4998.24	1	0	1	0	0	0	0.0120827
10662	4998.27	1	0	1	0	0	0	0.0120824
10664	4998.31	1	0	1	0	0	0	0.0120991
10666	4998.34	1	0	1	0	0	0	0.0121005
10668	4998.37	1	0	1	0	0	0	0.0121281
10670	4998.41	1	0	1	0	0	0	0.0120984
10672	4998.44	1	0	1	0	0	0	0.012119
10674	4998.47	1	0	1	0	0	0	0.0120953
10676	4998.51	1	0	1	0	0	0	0.0120681
10678	4998.54	1	0	1	0	0	0	0.0121291
10680	4998.57	1	0	1	0	0	0	0.0120866
10682	4998.61	1	0	1	0	0	0	0.0120789
10684	4998.64	1	0	1	0	0	0	0.0120702
10686	4998.67	1	0	1	0	0	0	0.0120639
10688	4998.71	1	0	1	0	0	0	0.0120691
10690	4998.74	1	0	1	0	0	0	0.0120834
10692	4998.77	1	0	1	0	0	0	0.012066
10694	4998.81	1	0	1	0	0	0	0.0120914
10696	4998.84	1	0	1	0	0	0	0.0121176
10698	4998.87	1	0	1	0	0	0	0.0120852
10700	4998.91	1	0	1	0	0	0	0.0120315
10702	4998.94	1	0	1	0	0	0	0.0120601
10704	4998.97	1	0	1	0	0	0	0.0120357
10706	4999.01	1	0	1	0	0	0	0.0120437
10708	4999.04	1	0	1	0	0	0	0.012088
10710	4999.07	1	0	1	0	0	0	0.0120918
10712	4999.11	1	0	1	0	0	0	0.0120928
10714	4999.14	1	0	1	0	0	0	0.0121172
10716	4999.17	1	0	1	0	0	0	0.0120698
10718	4999.21	1	0	1	0	0	0	0.0120426
10720	4999.24	1	0	1	0	0	0	0.0120227
10722	4999.27	1	0	1	0	0	0	0.0120545
10724	4999.31	1	0	1	0	0	0	0.0120719
10726	4999.34	1	0	1	0	0	0	0.0120824
10728	4999.37	1	0	1	0	0	0	0.0120461
10730	4999.41	1	0	1	0	0	0	0.0120988
10732	4999.44	1	0	1	0	0	0	0.012088
10734	4999.47	1	0	1	0	0	0	0.0120688
10736	4999.51	1	0	1	0	0	0	0.0121176
10738	4999.54	1	0	1	0	0	0	0.0121089
10740	4999.57	1	0	1	0	0	0	0.0120827
10742	4999.61	1	0	1	0	0	0	0.0120482
10744	4999.64	1	0	1	0	0	0	0.0121253
10746	4999.67	1	0	1	0	0	0	0.0120859
10748	4999.71	1	0	1	0	0	0	0.0120646
10750	4999.74	1	0	1	0	0	0	0.0120552
10752	4999.77	1	0	1	0	0	0	0.0120726
10754	4999.81	1	0	1	0	0	0	0.012104
10756	4999.84	1	0	1	0	0	0	0.0120663
10758	4999.87	1	0	1	0	0	0	0.0120684
10760	4999.91	1	0	1	0	0	0	0.012035
10762	4999.94	1	0	1	0	0	0	0.0120144
10764	4999.97	1	0	1	0	0	0	0.0120217
10766	5000.01	1	0	1	0	0	0	0.0120534
10768	5000.04	1	0	1	0	0	0	0.0119764
10770	5000.07	1	0	1	0	0	0	0.0119617
10772	5000.11	1	0	1	0	0	0	0.0119708
10774	5000.14	1	0	1	0	0	0	0.0119973
10776	5000.17	1	0	1	0	0	0	0.0120241
10778	5000.21	1	0	1	0	0	0	0.012036
10780	5000.24	1	0	1	0	0	0	0.0120098
10782	5000.27	1	0	1	0	0	0	0.0120433
10784	5000.31	1	0	1	0	0	0	0.0119792
10786	5000.34	1	0	1	0	0	0	0.0120001
10788	5000.37	1	0	1	0	0	0	0.0119889
10790	5000.41	1	0	1	0	0	0	0.0119746
10792	5000.44	1	0	1	0	0	0	0.0120262
10794	5000.47	1	0	1	0	0	0	0.0120147
10796	5000.51	1	0	1	0	0	0	0.0120297
10798	5000.54	1	0	1	0	0	0	0.0120838
10800	5000.57	1	0	1	0	0	0	0.0120405
10802	5000.61	1	0	1	0	0	0	0.0120642
10804	5000.64	1	0	1	0	0	0	0.0120921
10806	5000.67	1	0	1	0	0	0	0.0120611
10808	5000.71	1	0	1	0	0	0	0.0120967
10810	5000.74	1	0	1	0	0	0	0.0120754
10812	5000.77	1	0	1	0	0	0	0.012089
10814	5000.81	1	0	1	0	0	0	0.0120681
10816	5000.84	1	0	1	0	0	0	0.0120587
10818	5000.87	1	0	1	0	0	0	0.0120255
10820	5000.91	1	0	1	0	0	0	0.0121085
10822	5000.94	1	0	1	0	0	0	0.0120674
10824	5000.97	1	0	1	0	0	0	0.0120175
10826	5001.01	1	0	1	0	0	0	0.0120785
10828	5001.04	1	0	1	0	0	0	0.0120709
10830	5001.07	1	0	1	0	0	0	0.0121326
10832	5001.11	1	0	1	0	0	0	0.012104
10834	5001.14	1	0	1	0	0	0	0.0120967
10836	5001.17	1	0	1	0	0	0	0.0120859
10838	5001.21	1	0	1	0	0	0	0.0120949
10840	5001.24	1	0	1	0	0	0	0.0121315
10842	5001.27	1	0	1	0	0	0	0.0121476
10844	5001.31	1	0	1	0	0	0	0.0121305
10846	5001.34	1	0	1	0	0	0	0.0121675
10848	5001.37	1	0	1	0	0	0	0.0121315
10850	5001.41	1	0	1	0	0	0	0.0121654
10852	5001.44	1	0	1	0	0	0	0.0121811
10854	5001.47	1	0	1	0	0	0	0.0121744
10856	5001.51	1	0	1	0	0	0	0.0121654
10858	5001.54	1	0	1	0	0	0	0.0121427
10860	5001.57	1	0	1	0	0	0	0.0121249
10862	5001.61	1	0	1	0	0	0	0.0121692
10864	5001.64	1	0	1	0	0	0	0.0121375
10866	5001.67	1	0	1	0	0	0	0.0121483
10868	5001.71	1	0	1	0	0	0	0.0121396
10870	5001.74	1	0	1	0	0	0	0.0121479
10872	5001.77	1	0	1	0	0	0	0.0121047
10874	5001.81	1	0	1	0	0	0	0.0121274
10876	5001.84	1	0	1	0	0	0	0.0121444
10878	5001.87	1	0	1	0	0	0	0.0120855
10880	5001.91	1	0	1	0	0	0	0.0121148
10882	5001.94	1	0	1	0	0	0	0.0121256
10884	5001.97	1	0	1	0	0	0	0.0120827
10886	5002.01	1	0	1	0	0	0	0.0120925
10888	5002.04	1	0	1	0	0	0	0.0121486
10890	5002.07	1	0	1	0	0	0	0.0120709
10892	5002.11	1	0	1	0	0	0	0.0121284
10894	5002.14	1	0	1	0	0	0	0.0120723
10896	5002.17	1	0	1	0	0	0	0.0120646
10898	5002.21	1	0	1	0	0	0	0.0120932
10900	5002.24	1	0	1	0	0	0	0.0121054
10902	5002.27	1	0	1	0	0	0	0.0121012
10904	5002.31	1	0	1	0	0	0	0.0121172
10906	5002.34	1	0	1	0	0	0	0.0120611
10908	5002.37	1	0	1	0	0	0	0.0120336
10910	5002.41	1	0	1	0	0	0	0.0120329
10912	5002.44	1	0	1	0	0	0	0.0120165
10914	5002.47	1	0	1	0	0	0	0.0120273
10916	5002.51	1	0	1	0	0	0	0.0120538
10918	5002.54	1	0	1	0	0	0	0.0120454
10920	5002.57	1	0	1	0	0	0	0.0119725
10922	5002.61	1	0	1	0	0	0	0.0120423
10924	5002.64	1	0	1	0	0	0	0.0120248
10926	5002.67	1	0	1	0	0	0	0.0120391
10928	5002.71	1	0	1	0	0	0	0.0119907
10930	5002.74	1	0	1	0	0	0	0.0120308
10932	5002.77	1	0	1	0	0	0	0.0119666
10934	5002.81	1	0	1	0	0	0	0.011982
10936	5002.84	1	0	1	0	0	0	0.0120137
10938	5002.87	1	0	1	0	0	0	0.0120374
10940	5002.91	1	0	1	0	0	0	0.012088
10942	5002.94	1	0	1	0	0	0	0.0119942
10944	5002.97	1	0	1	0	0	0	0.0120486
10946	5003.01	1	0	1	0	0	0	0.0120074
10948	5003.04	1	0	1	0	0	0	0.0120224
10950	5003.07	1	0	1	0	0	0	0.0120207
10952	5003.11	1	0	1	0	0	0	0.0120015
10954	5003.14	1	0	1	0	0	0	0.0120343
10956	5003.17	1	0	1	0	0	0	0.0120175
10958	5003.21	1	0	1	0	0	0	0.0120203
10960	5003.24	1	0	1	0	0	0	0.0120154
10962	5003.27	1	0	1	0	0	0	0.0120311
10964	5003.31	1	0	1	0	0	0	0.0120088
10966	5003.34	1	0	1	0	0	0	0.0120255
10968	5003.37	1	0	1	0	0	0	0.0120203
10970	5003.41	1	0	1	0	0	0	0.0120765
10972	5003.44	1	0	1	0	0	0	0.0120269
10974	5003.47	1	0	1	0	0	0	0.0120726
10976	5003.51	1	0	1	0	0	0	0.0120304
10978	5003.54	1	0	1	0	0	0	0.0120409
10980	5003.57	1	0	1	0	0	0	0.0120562
10982	5003.61	1	0	1	0	0	0	0.0120506
10984	5003.64	1	0	1	0	0	0	0.0121096
10986	5003.67	1	0	1	0	0	0	0.0120513
10988	5003.71	1	0	1	0	0	0	0.0121005
10990	5003.74	1	0	1	0	0	0	0.0120974
10992	5003.77	1	0	1	0	0	0	0.0121124
10994	5003.81	1	0	1	0	0	0	0.0120984
10996	5003.84	1	0	1	0	0	0	0.0121239
10998	5003.87	1	0	1	0	0	0	0.0121657
11000	5003.91	1	0	1	0	0	0	0.0121312
11002	5003.94	1	0	1	0	0	0	0.0121036
11004	5003.97	1	0	1	0	0	0	0.0120785
11006	5004.01	1	0	1	0	0	0	0.0121117
11008	5004.04	1	0	1	0	0	0	0.0121026
11010	5004.07	1	0	1	0	0	0	0.0120921
11012	5004.11	1	0	1	0	0	0	0.0120761
11014	5004.14	1	0	1	0	0	0	0.0121159
11016	5004.17	1	0	1	0	0	0	0.0121047
11018	5004.21	1	0	1	0	0	0	0.0120925
11020	5004.24	1	0	1	0	0	0	0.0120785
11022	5004.27	1	0	1	0	0	0	0.0121036
11024	5004.31	1	0	1	0	0	0	0.0120813
11026	5004.34	1	0	1	0	0	0	0.0120751
11028	5004.37	1	0	1	0	0	0	0.0120761
11030	5004.41	1	0	1	0	0	0	0.012073
11032	5004.44	1	0	1	0	0	0	0.0120869
11034	5004.47	1	0	1	0	0	0	0.0120914
11036	5004.51	1	0	1	0	0	0	0.0120995
11038	5004.54	1	0	1	0	0	0	0.0120866
11040	5004.57	1	0	1	0	0	0	0.0120723
11042	5004.61	1	0	1	0	0	0	0.0120527
11044	5004.64	1	0	1	0	0	0	0.0120384
11046	5004.67	1	0	1	0	0	0	0.0120824
11048	5004.71	1	0	1	0	0	0	0.0120594
11050	5004.74	1	0	1	0	0	0	0.012052
11052	5004.77	1	0	1	0	0	0	0.0120527
11054	5004.81	1	0	1	0	0	0	0.0120569
11056	5004.84	1	0	1	0	0	0	0.0120227
11058	5004.87	1	0	1	0	0	0	0.0120381
11060	5004.91	1	0	1	0	0	0	0.0119795
11062	5004.94	1	0	1	0	0	0	0.0120618
11064	5004.97	1	0	1	0	0	0	0.0120217
11066	5005.01	1	0	1	0	0	0	0.0120363
11068	5005.04	1	0	1	0	0	0	0.0120332
11070	5005.07	1	0	1	0	0	0	0.0120154
11072	5005.11	1	0	1	0	0	0	0.0120642
11074	5005.14	1	0	1	0	0	0	0.0120482
11076	5005.17	1	0	1	0	0	0	0.0120545
11078	5005.21	1	0	1	0	0	0	0.0120831
11080	5005.24	1	0	1	0	0	0	0.0120304
11082	5005.27	1	0	1	0	0	0	0.0120444
11084	5005.31	1	0	1	0	0	0	0.0120325
11086	5005.34	1	0	1	0	0	0	0.0120642
11088	5005.37	1	0	1	0	0	0	0.0120444
11090	5005.41	1	0	1	0	0	0	0.0121092
11092	5005.44	1	0	1	0	0	0	0.0120838
11094	5005.47	1	0	1	0	0	0	0.0120911
11096	5005.51	1	0	1	0	0	0	0.0121214
11098	5005.54	1	0	1	0	0	0	0.0121343
11100	5005.57	1	0	1	0	0	0	0.0121263
11102	5005.61	1	0	1	0	0	0	0.0121221
11104	5005.64	1	0	1	0	0	0	0.0121228
11106	5005.67	1	0	1	0	0	0	0.0121385
11108	5005.71	1	0	1	0	0	0	0.0121211
[truncated: 34,160 more rows]

## Sheet: Mouse_2_470_Signal
FrameCounter	Timestamp	LedState	Stimulation	Output0	Output1	Input0	Input1	Region0G
7111	4939.09	2	0	1	0	0	0	0.0144616
7113	4939.13	2	0	1	0	0	0	0.0144431
7115	4939.16	2	0	1	0	0	0	0.0144459
7117	4939.19	2	0	1	0	0	0	0.0144606
7119	4939.23	2	0	1	0	0	0	0.014479
7121	4939.26	2	0	1	0	0	0	0.0144871
7123	4939.29	2	0	1	0	0	0	0.0144913
7125	4939.33	2	0	1	0	0	0	0.0144986
7127	4939.36	2	0	1	0	0	0	0.014508
7129	4939.39	2	0	1	0	0	0	0.0145254
7131	4939.43	2	0	1	0	0	0	0.014562
7133	4939.46	2	0	1	0	0	0	0.0145066
7135	4939.49	2	0	1	0	0	0	0.0145397
7137	4939.53	2	0	1	0	0	0	0.0145729
7139	4939.56	2	0	1	0	0	0	0.0145864
7141	4939.59	2	0	1	0	0	0	0.0145742
7143	4939.63	2	0	1	0	0	0	0.0145837
7145	4939.66	2	0	1	0	0	0	0.0145847
7147	4939.69	2	0	1	0	0	0	0.0145826
7149	4939.73	2	0	1	0	0	0	0.0145659
7151	4939.76	2	0	1	0	0	0	0.0146199
7153	4939.79	2	0	1	0	0	0	0.0146286
7155	4939.83	2	0	1	0	0	0	0.014614
7157	4939.86	2	0	1	0	0	0	0.0146168
7159	4939.89	2	0	1	0	0	0	0.0146136
7161	4939.93	2	0	1	0	0	0	0.0145861
7163	4939.96	2	0	1	0	0	0	0.0146496
7165	4939.99	2	0	1	0	0	0	0.0146614
7167	4940.03	2	0	1	0	0	0	0.0145941
7169	4940.06	2	0	1	0	0	0	0.0146342
7171	4940.09	2	0	1	0	0	0	0.0145966
7173	4940.13	2	0	1	0	0	0	0.0146102
7175	4940.16	2	0	1	0	0	0	0.0145715
7177	4940.19	2	0	1	0	0	0	0.0145453
7179	4940.23	2	0	1	0	0	0	0.0145767
7181	4940.26	2	0	1	0	0	0	0.0145212
7183	4940.29	2	0	1	0	0	0	0.014569
7185	4940.33	2	0	1	0	0	0	0.0145882
7187	4940.36	2	0	1	0	0	0	0.0145756
7189	4940.39	2	0	1	0	0	0	0.0146276
7191	4940.43	2	0	1	0	0	0	0.0146175
7193	4940.46	2	0	1	0	0	0	0.0146384
7195	4940.49	2	0	1	0	0	0	0.0146133
7197	4940.53	2	0	1	0	0	0	0.0146694
7199	4940.56	2	0	1	0	0	0	0.0146952
7201	4940.59	2	0	1	0	0	0	0.0147193
7203	4940.63	2	0	1	0	0	0	0.014728
7205	4940.66	2	0	1	0	0	0	0.0147598
7207	4940.69	2	0	1	0	0	0	0.0147835
7209	4940.73	2	0	1	0	0	0	0.0147922
7211	4940.76	2	0	1	0	0	0	0.0147831
7213	4940.79	2	0	1	0	0	0	0.014758
7215	4940.83	2	0	1	0	0	0	0.0147706
7217	4940.86	2	0	1	0	0	0	0.0148187
7219	4940.89	2	0	1	0	0	0	0.0147793
7221	4940.93	2	0	1	0	0	0	0.0147943
7223	4940.96	2	0	1	0	0	0	0.0148239
7225	4940.99	2	0	1	0	0	0	0.0148072
7227	4941.03	2	0	1	0	0	0	0.0148319
7229	4941.06	2	0	1	0	0	0	0.0148699
7231	4941.09	2	0	1	0	0	0	0.0148532
7233	4941.13	2	0	1	0	0	0	0.0148501
7235	4941.16	2	0	1	0	0	0	0.0148044
7237	4941.19	2	0	1	0	0	0	0.0147999
7239	4941.23	2	0	1	0	0	0	0.0148187
7241	4941.26	2	0	1	0	0	0	0.014773
7243	4941.29	2	0	1	0	0	0	0.0147444
7245	4941.33	2	0	1	0	0	0	0.0147524
7247	4941.36	2	0	1	0	0	0	0.0147099
7249	4941.39	2	0	1	0	0	0	0.0147469
7251	4941.43	2	0	1	0	0	0	0.014743
7253	4941.46	2	0	1	0	0	0	0.0146736
7255	4941.49	2	0	1	0	0	0	0.0146834
7257	4941.53	2	0	1	0	0	0	0.0146977
7259	4941.56	2	0	1	0	0	0	0.0146865
7261	4941.59	2	0	1	0	0	0	0.0147155
7263	4941.63	2	0	1	0	0	0	0.0147061
7265	4941.66	2	0	1	0	0	0	0.0147305
7267	4941.69	2	0	1	0	0	0	0.0146911
7269	4941.73	2	0	1	0	0	0	0.0146872
7271	4941.76	2	0	1	0	0	0	0.0147022
7273	4941.79	2	0	1	0	0	0	0.0146872
7275	4941.83	2	0	1	0	0	0	0.0146907
7277	4941.86	2	0	1	0	0	0	0.0147315
7279	4941.89	2	0	1	0	0	0	0.0146893
7281	4941.93	2	0	1	0	0	0	0.014697
7283	4941.96	2	0	1	0	0	0	0.0146956
7285	4941.99	2	0	1	0	0	0	0.0147207
7287	4942.03	2	0	1	0	0	0	0.0146897
7289	4942.06	2	0	1	0	0	0	0.0147113
7291	4942.09	2	0	1	0	0	0	0.014712
7293	4942.13	2	0	1	0	0	0	0.0146939
7295	4942.16	2	0	1	0	0	0	0.0147057
7297	4942.19	2	0	1	0	0	0	0.014651
7299	4942.23	2	0	1	0	0	0	0.0146722
7301	4942.26	2	0	1	0	0	0	0.0146607
7303	4942.29	2	0	1	0	0	0	0.0146531
7305	4942.33	2	0	1	0	0	0	0.0146053
7307	4942.36	2	0	1	0	0	0	0.0146269
7309	4942.39	2	0	1	0	0	0	0.0146597
7311	4942.43	2	0	1	0	0	0	0.0146377
7313	4942.46	2	0	1	0	0	0	0.0146471
7315	4942.49	2	0	1	0	0	0	0.0146297
7317	4942.53	2	0	1	0	0	0	0.0146527
7319	4942.56	2	0	1	0	0	0	0.0146217
7321	4942.59	2	0	1	0	0	0	0.0146021
7323	4942.63	2	0	1	0	0	0	0.0146286
7325	4942.66	2	0	1	0	0	0	0.0146241
7327	4942.69	2	0	1	0	0	0	0.0146143
7329	4942.73	2	0	1	0	0	0	0.0145718
7331	4942.76	2	0	1	0	0	0	0.0145788
7333	4942.79	2	0	1	0	0	0	0.0145481
7335	4942.83	2	0	1	0	0	0	0.0145474
7337	4942.86	2	0	1	0	0	0	0.0145446
7339	4942.89	2	0	1	0	0	0	0.0145477
7341	4942.93	2	0	1	0	0	0	0.0145394
7343	4942.96	2	0	1	0	0	0	0.0145383
7345	4942.99	2	0	1	0	0	0	0.0146705
7347	4943.03	2	0	1	0	0	0	0.0147221
7349	4943.06	2	0	1	0	0	0	0.0146893
7351	4943.09	2	0	1	0	0	0	0.0146705
7353	4943.13	2	0	1	0	0	0	0.0146325
7355	4943.16	2	0	1	0	0	0	0.0146332
7357	4943.19	2	0	1	0	0	0	0.0145906
7359	4943.23	2	0	1	0	0	0	0.0145913
7361	4943.26	2	0	1	0	0	0	0.014607
7363	4943.29	2	0	1	0	0	0	0.0145941
7365	4943.33	2	0	1	0	0	0	0.0145411
7367	4943.36	2	0	1	0	0	0	0.0145732
7369	4943.39	2	0	1	0	0	0	0.0145401
7371	4943.43	2	0	1	0	0	0	0.0145638
7373	4943.46	2	0	1	0	0	0	0.0145425
7375	4943.49	2	0	1	0	0	0	0.0145627
7377	4943.53	2	0	1	0	0	0	0.0145777
7379	4943.56	2	0	1	0	0	0	0.0145035
7381	4943.59	2	0	1	0	0	0	0.0145024
7383	4943.63	2	0	1	0	0	0	0.0145596
7385	4943.66	2	0	1	0	0	0	0.014546
7387	4943.69	2	0	1	0	0	0	0.0145076
7389	4943.73	2	0	1	0	0	0	0.0145069
7391	4943.76	2	0	1	0	0	0	0.0145035
7393	4943.79	2	0	1	0	0	0	0.0144689
7395	4943.83	2	0	1	0	0	0	0.0145024
7397	4943.86	2	0	1	0	0	0	0.0145
7399	4943.89	2	0	1	0	0	0	0.0145634
7401	4943.93	2	0	1	0	0	0	0.0145066
7403	4943.96	2	0	1	0	0	0	0.0145007
7405	4943.99	2	0	1	0	0	0	0.0145167
7407	4944.03	2	0	1	0	0	0	0.0144986
7409	4944.06	2	0	1	0	0	0	0.0145045
7411	4944.09	2	0	1	0	0	0	0.0145209
7413	4944.13	2	0	1	0	0	0	0.0144804
7415	4944.16	2	0	1	0	0	0	0.0144878
7417	4944.19	2	0	1	0	0	0	0.0144822
7419	4944.23	2	0	1	0	0	0	0.0144574
7421	4944.26	2	0	1	0	0	0	0.0144675
7423	4944.29	2	0	1	0	0	0	0.0144627
7425	4944.33	2	0	1	0	0	0	0.0144452
7427	4944.36	2	0	1	0	0	0	0.0144316
7429	4944.39	2	0	1	0	0	0	0.0144853
7431	4944.43	2	0	1	0	0	0	0.014441
7433	4944.46	2	0	1	0	0	0	0.0144267
7435	4944.49	2	0	1	0	0	0	0.0144696
7437	4944.53	2	0	1	0	0	0	0.0144661
7439	4944.56	2	0	1	0	0	0	0.0145185
7441	4944.59	2	0	1	0	0	0	0.0144808
7443	4944.63	2	0	1	0	0	0	0.0145157
7445	4944.66	2	0	1	0	0	0	0.0144609
7447	4944.69	2	0	1	0	0	0	0.0144393
7449	4944.73	2	0	1	0	0	0	0.0144815
7451	4944.76	2	0	1	0	0	0	0.0144281
7453	4944.79	2	0	1	0	0	0	0.0145069
7455	4944.83	2	0	1	0	0	0	0.0145272
7457	4944.86	2	0	1	0	0	0	0.0144818
7459	4944.89	2	0	1	0	0	0	0.0145104
7461	4944.93	2	0	1	0	0	0	0.0144417
7463	4944.96	2	0	1	0	0	0	0.0144473
7465	4944.99	2	0	1	0	0	0	0.0144693
7467	4945.03	2	0	1	0	0	0	0.0143905
7469	4945.06	2	0	1	0	0	0	0.0144574
7471	4945.09	2	0	1	0	0	0	0.0144337
7473	4945.13	2	0	1	0	0	0	0.0144177
7475	4945.16	2	0	1	0	0	0	0.0144512
7477	4945.19	2	0	1	0	0	0	0.014418
7479	4945.23	2	0	1	0	0	0	0.0144777
7481	4945.26	2	0	1	0	0	0	0.0143737
7483	4945.29	2	0	1	0	0	0	0.0144407
7485	4945.33	2	0	1	0	0	0	0.0144895
7487	4945.36	2	0	1	0	0	0	0.0144156
7489	4945.39	2	0	1	0	0	0	0.014403
7491	4945.43	2	0	1	0	0	0	0.0144815
7493	4945.46	2	0	1	0	0	0	0.0144369
7495	4945.49	2	0	1	0	0	0	0.0144114
7497	4945.53	2	0	1	0	0	0	0.0144201
7499	4945.56	2	0	1	0	0	0	0.0144665
7501	4945.59	2	0	1	0	0	0	0.0143859
7503	4945.63	2	0	1	0	0	0	0.014463
7505	4945.66	2	0	1	0	0	0	0.0145404
7507	4945.69	2	0	1	0	0	0	0.0145701
7509	4945.73	2	0	1	0	0	0	0.0145955
7511	4945.76	2	0	1	0	0	0	0.0146018
7513	4945.79	2	0	1	0	0	0	0.0146032
7515	4945.83	2	0	1	0	0	0	0.0145729
7517	4945.86	2	0	1	0	0	0	0.0145798
7519	4945.89	2	0	1	0	0	0	0.01453
7521	4945.93	2	0	1	0	0	0	0.0145694
7523	4945.96	2	0	1	0	0	0	0.014584
7525	4945.99	2	0	1	0	0	0	0.0145575
7527	4946.03	2	0	1	0	0	0	0.0145683
7529	4946.06	2	0	1	0	0	0	0.0145303
7531	4946.09	2	0	1	0	0	0	0.0145376
7533	4946.13	2	0	1	0	0	0	0.0146056
7535	4946.16	2	0	1	0	0	0	0.014613
7537	4946.19	2	0	1	0	0	0	0.0146475
7539	4946.23	2	0	1	0	0	0	0.014651
7541	4946.26	2	0	1	0	0	0	0.0146722
7543	4946.29	2	0	1	0	0	0	0.014727
7545	4946.33	2	0	1	0	0	0	0.0146729
7547	4946.36	2	0	1	0	0	0	0.0147465
7549	4946.39	2	0	1	0	0	0	0.0147873
7551	4946.43	2	0	1	0	0	0	0.0148218
7553	4946.46	2	0	1	0	0	0	0.0147995
7555	4946.49	2	0	1	0	0	0	0.0147824
7557	4946.53	2	0	1	0	0	0	0.0148075
7559	4946.56	2	0	1	0	0	0	0.0148229
7561	4946.59	2	0	1	0	0	0	0.0147884
7563	4946.63	2	0	1	0	0	0	0.0148187
7565	4946.66	2	0	1	0	0	0	0.014849
7567	4946.69	2	0	1	0	0	0	0.0148546
7569	4946.73	2	0	1	0	0	0	0.0148605
7571	4946.76	2	0	1	0	0	0	0.0148829
7573	4946.79	2	0	1	0	0	0	0.0148825
7575	4946.83	2	0	1	0	0	0	0.0148982
7577	4946.86	2	0	1	0	0	0	0.0148428
7579	4946.89	2	0	1	0	0	0	0.0148504
7581	4946.93	2	0	1	0	0	0	0.0148382
7583	4946.96	2	0	1	0	0	0	0.0148061
7585	4946.99	2	0	1	0	0	0	0.0148403
7587	4947.03	2	0	1	0	0	0	0.0148407
7589	4947.06	2	0	1	0	0	0	0.0148522
7591	4947.09	2	0	1	0	0	0	0.0148138
7593	4947.13	2	0	1	0	0	0	0.0147936
7595	4947.16	2	0	1	0	0	0	0.0147754
7597	4947.19	2	0	1	0	0	0	0.014772
7599	4947.23	2	0	1	0	0	0	0.0147856
7601	4947.26	2	0	1	0	0	0	0.0147598
7603	4947.29	2	0	1	0	0	0	0.0147528
7605	4947.33	2	0	1	0	0	0	0.0147312
7607	4947.36	2	0	1	0	0	0	0.0147667
7609	4947.39	2	0	1	0	0	0	0.0147266
7611	4947.43	2	0	1	0	0	0	0.0147301
7613	4947.46	2	0	1	0	0	0	0.0147566
7615	4947.49	2	0	1	0	0	0	0.0147144
7617	4947.53	2	0	1	0	0	0	0.0147629
7619	4947.56	2	0	1	0	0	0	0.0147587
7621	4947.59	2	0	1	0	0	0	0.0147005
7623	4947.63	2	0	1	0	0	0	0.0147761
7625	4947.66	2	0	1	0	0	0	0.0147908
7627	4947.69	2	0	1	0	0	0	0.0147378
7629	4947.73	2	0	1	0	0	0	0.0147681
7631	4947.76	2	0	1	0	0	0	0.014766
7633	4947.79	2	0	1	0	0	0	0.0147768
7635	4947.83	2	0	1	0	0	0	0.0147608
7637	4947.86	2	0	1	0	0	0	0.0147378
7639	4947.89	2	0	1	0	0	0	0.0147782
7641	4947.93	2	0	1	0	0	0	0.0147556
7643	4947.96	2	0	1	0	0	0	0.0147148
7645	4947.99	2	0	1	0	0	0	0.0147594
7647	4948.03	2	0	1	0	0	0	0.0147744
7649	4948.06	2	0	1	0	0	0	0.0147901
7651	4948.09	2	0	1	0	0	0	0.0147859
7653	4948.13	2	0	1	0	0	0	0.0147981
7655	4948.16	2	0	1	0	0	0	0.0147877
7657	4948.19	2	0	1	0	0	0	0.0147943
7659	4948.23	2	0	1	0	0	0	0.0147605
7661	4948.26	2	0	1	0	0	0	0.0147768
7663	4948.29	2	0	1	0	0	0	0.0148424
7665	4948.33	2	0	1	0	0	0	0.014803
7667	4948.36	2	0	1	0	0	0	0.014787
7669	4948.39	2	0	1	0	0	0	0.0147685
7671	4948.43	2	0	1	0	0	0	0.0147824
7673	4948.46	2	0	1	0	0	0	0.0148103
7675	4948.49	2	0	1	0	0	0	0.014833
7677	4948.53	2	0	1	0	0	0	0.0148194
7679	4948.56	2	0	1	0	0	0	0.0148047
7681	4948.59	2	0	1	0	0	0	0.0148693
7683	4948.63	2	0	1	0	0	0	0.0148654
7685	4948.66	2	0	1	0	0	0	0.0148434
7687	4948.69	2	0	1	0	0	0	0.0148731
7689	4948.73	2	0	1	0	0	0	0.0148428
7691	4948.76	2	0	1	0	0	0	0.0148333
7693	4948.79	2	0	1	0	0	0	0.0148452
7695	4948.83	2	0	1	0	0	0	0.0148086
7697	4948.86	2	0	1	0	0	0	0.0147999
7699	4948.89	2	0	1	0	0	0	0.0147988
7701	4948.93	2	0	1	0	0	0	0.0147838
7703	4948.96	2	0	1	0	0	0	0.0148075
7705	4948.99	2	0	1	0	0	0	0.0147894
7707	4949.03	2	0	1	0	0	0	0.0148156
7709	4949.06	2	0	1	0	0	0	0.0148142
7711	4949.09	2	0	1	0	0	0	0.0148462
7713	4949.13	2	0	1	0	0	0	0.014826
7715	4949.16	2	0	1	0	0	0	0.0148319
7717	4949.19	2	0	1	0	0	0	0.0148455
7719	4949.23	2	0	1	0	0	0	0.0148407
7721	4949.26	2	0	1	0	0	0	0.0148445
7723	4949.29	2	0	1	0	0	0	0.0148745
7725	4949.33	2	0	1	0	0	0	0.0149223
7727	4949.36	2	0	1	0	0	0	0.0149278
7729	4949.39	2	0	1	0	0	0	0.0149414
7731	4949.43	2	0	1	0	0	0	0.0149446
7733	4949.46	2	0	1	0	0	0	0.0149184
7735	4949.49	2	0	1	0	0	0	0.014954
7737	4949.53	2	0	1	0	0	0	0.0149662
7739	4949.56	2	0	1	0	0	0	0.0149512
7741	4949.59	2	0	1	0	0	0	0.0149013
7743	4949.63	2	0	1	0	0	0	0.0149665
7745	4949.66	2	0	1	0	0	0	0.0149034
7747	4949.69	2	0	1	0	0	0	0.0149121
7749	4949.73	2	0	1	0	0	0	0.0149362
7751	4949.76	2	0	1	0	0	0	0.0149048
7753	4949.79	2	0	1	0	0	0	0.0149198
7755	4949.83	2	0	1	0	0	0	0.014923
7757	4949.86	2	0	1	0	0	0	0.0149177
7759	4949.89	2	0	1	0	0	0	0.0149237
7761	4949.93	2	0	1	0	0	0	0.0149359
7763	4949.96	2	0	1	0	0	0	0.0149763
7765	4949.99	2	0	1	0	0	0	0.0149324
7767	4950.03	2	0	1	0	0	0	0.0148794
7769	4950.06	2	0	1	0	0	0	0.0148668
7771	4950.09	2	0	1	0	0	0	0.0149153
7773	4950.13	2	0	1	0	0	0	0.0148902
7775	4950.16	2	0	1	0	0	0	0.0148926
7777	4950.19	2	0	1	0	0	0	0.0148079
7779	4950.23	2	0	1	0	0	0	0.0148117
7781	4950.26	2	0	1	0	0	0	0.0147971
7783	4950.29	2	0	1	0	0	0	0.0148156
7785	4950.33	2	0	1	0	0	0	0.0148211
7787	4950.36	2	0	1	0	0	0	0.0147789
7789	4950.39	2	0	1	0	0	0	0.0147605
7791	4950.43	2	0	1	0	0	0	0.014742
7793	4950.46	2	0	1	0	0	0	0.0147095
7795	4950.49	2	0	1	0	0	0	0.0146879
7797	4950.53	2	0	1	0	0	0	0.0146942
7799	4950.56	2	0	1	0	0	0	0.014736
7801	4950.59	2	0	1	0	0	0	0.0147162
7803	4950.63	2	0	1	0	0	0	0.0146743
7805	4950.66	2	0	1	0	0	0	0.014636
7807	4950.69	2	0	1	0	0	0	0.0146649
7809	4950.73	2	0	1	0	0	0	0.0146381
7811	4950.76	2	0	1	0	0	0	0.0146004
7813	4950.79	2	0	1	0	0	0	0.0145586
7815	4950.83	2	0	1	0	0	0	0.0145952
7817	4950.86	2	0	1	0	0	0	0.0145987
7819	4950.89	2	0	1	0	0	0	0.0146154
7821	4950.93	2	0	1	0	0	0	0.0146168
7823	4950.96	2	0	1	0	0	0	0.0145795
7825	4950.99	2	0	1	0	0	0	0.0145931
7827	4951.03	2	0	1	0	0	0	0.0146105
7829	4951.06	2	0	1	0	0	0	0.0146614
7831	4951.09	2	0	1	0	0	0	0.0145858
7833	4951.13	2	0	1	0	0	0	0.0145599
7835	4951.16	2	0	1	0	0	0	0.0146091
7837	4951.19	2	0	1	0	0	0	0.0145606
7839	4951.23	2	0	1	0	0	0	0.0145861
7841	4951.26	2	0	1	0	0	0	0.0145488
7843	4951.29	2	0	1	0	0	0	0.014598
7845	4951.33	2	0	1	0	0	0	0.014621
7847	4951.36	2	0	1	0	0	0	0.0145976
7849	4951.39	2	0	1	0	0	0	0.0145749
7851	4951.43	2	0	1	0	0	0	0.0145952
7853	4951.46	2	0	1	0	0	0	0.0145798
7855	4951.49	2	0	1	0	0	0	0.014598
7857	4951.53	2	0	1	0	0	0	0.0146262
7859	4951.56	2	0	1	0	0	0	0.0146053
7861	4951.59	2	0	1	0	0	0	0.0145355
7863	4951.63	2	0	1	0	0	0	0.0145711
7865	4951.66	2	0	1	0	0	0	0.0145729
7867	4951.69	2	0	1	0	0	0	0.0145523
7869	4951.73	2	0	1	0	0	0	0.0146056
7871	4951.76	2	0	1	0	0	0	0.0146377
7873	4951.79	2	0	1	0	0	0	0.0146157
7875	4951.83	2	0	1	0	0	0	0.0146339
7877	4951.86	2	0	1	0	0	0	0.0146266
7879	4951.89	2	0	1	0	0	0	0.0146192
7881	4951.93	2	0	1	0	0	0	0.0146063
7883	4951.96	2	0	1	0	0	0	0.0145851
7885	4951.99	2	0	1	0	0	0	0.0145941
7887	4952.03	2	0	1	0	0	0	0.0146185
7889	4952.06	2	0	1	0	0	0	0.0145819
7891	4952.09	2	0	1	0	0	0	0.0146088
7893	4952.13	2	0	1	0	0	0	0.0145631
7895	4952.16	2	0	1	0	0	0	0.0145788
7897	4952.19	2	0	1	0	0	0	0.0145606
7899	4952.23	2	0	1	0	0	0	0.014539
7901	4952.26	2	0	1	0	0	0	0.0144505
7903	4952.29	2	0	1	0	0	0	0.0144532
7905	4952.33	2	0	1	0	0	0	0.0144334
7907	4952.36	2	0	1	0	0	0	0.0145157
7909	4952.39	2	0	1	0	0	0	0.0144355
7911	4952.43	2	0	1	0	0	0	0.0144173
7913	4952.46	2	0	1	0	0	0	0.0143859
7915	4952.49	2	0	1	0	0	0	0.0144104
7917	4952.53	2	0	1	0	0	0	0.0144285
7919	4952.56	2	0	1	0	0	0	0.0144355
7921	4952.59	2	0	1	0	0	0	0.0144243
7923	4952.63	2	0	1	0	0	0	0.0144117
7925	4952.66	2	0	1	0	0	0	0.0144773
7927	4952.69	2	0	1	0	0	0	0.0144358
7929	4952.73	2	0	1	0	0	0	0.014455
7931	4952.76	2	0	1	0	0	0	0.0145157
7933	4952.79	2	0	1	0	0	0	0.0145537
7935	4952.83	2	0	1	0	0	0	0.0145561
7937	4952.86	2	0	1	0	0	0	0.0145812
7939	4952.89	2	0	1	0	0	0	0.0145289
7941	4952.93	2	0	1	0	0	0	0.0145195
7943	4952.96	2	0	1	0	0	0	0.0145488
7945	4952.99	2	0	1	0	0	0	0.0145198
7947	4953.03	2	0	1	0	0	0	0.0145547
7949	4953.06	2	0	1	0	0	0	0.0145118
7951	4953.09	2	0	1	0	0	0	0.0145582
7953	4953.13	2	0	1	0	0	0	0.0145345
7955	4953.16	2	0	1	0	0	0	0.0145533
7957	4953.19	2	0	1	0	0	0	0.014538
7959	4953.23	2	0	1	0	0	0	0.0145083
7961	4953.26	2	0	1	0	0	0	0.0145014
7963	4953.29	2	0	1	0	0	0	0.0145338
7965	4953.33	2	0	1	0	0	0	0.0145185
7967	4953.36	2	0	1	0	0	0	0.0145303
7969	4953.39	2	0	1	0	0	0	0.0144947
7971	4953.43	2	0	1	0	0	0	0.0144871
7973	4953.46	2	0	1	0	0	0	0.0144808
7975	4953.49	2	0	1	0	0	0	0.0145073
7977	4953.53	2	0	1	0	0	0	0.0145174
7979	4953.56	2	0	1	0	0	0	0.0144989
7981	4953.59	2	0	1	0	0	0	0.0144641
7983	4953.63	2	0	1	0	0	0	0.0144766
7985	4953.66	2	0	1	0	0	0	0.0144899
7987	4953.69	2	0	1	0	0	0	0.0144906
7989	4953.73	2	0	1	0	0	0	0.0144365
7991	4953.76	2	0	1	0	0	0	0.0144515
7993	4953.79	2	0	1	0	0	0	0.0144731
7995	4953.83	2	0	1	0	0	0	0.0144585
7997	4953.86	2	0	1	0	0	0	0.0144728
7999	4953.89	2	0	1	0	0	0	0.0144867
8001	4953.93	2	0	1	0	0	0	0.0145059
8003	4953.96	2	0	1	0	0	0	0.0145108
8005	4953.99	2	0	1	0	0	0	0.014538
8007	4954.03	2	0	1	0	0	0	0.0145593
8009	4954.06	2	0	1	0	0	0	0.0145858
8011	4954.09	2	0	1	0	0	0	0.0144801
8013	4954.13	2	0	1	0	0	0	0.0145174
8015	4954.16	2	0	1	0	0	0	0.0145638
8017	4954.19	2	0	1	0	0	0	0.0145729
8019	4954.23	2	0	1	0	0	0	0.0145317
8021	4954.26	2	0	1	0	0	0	0.0145589
8023	4954.29	2	0	1	0	0	0	0.0145195
8025	4954.33	2	0	1	0	0	0	0.0145655
8027	4954.36	2	0	1	0	0	0	0.0145279
8029	4954.39	2	0	1	0	0	0	0.0145575
8031	4954.43	2	0	1	0	0	0	0.0145049
8033	4954.46	2	0	1	0	0	0	0.0145645
8035	4954.49	2	0	1	0	0	0	0.0145847
8037	4954.53	2	0	1	0	0	0	0.0146028
8039	4954.56	2	0	1	0	0	0	0.0145878
8041	4954.59	2	0	1	0	0	0	0.0146004
8043	4954.63	2	0	1	0	0	0	0.0145516
8045	4954.66	2	0	1	0	0	0	0.0145282
8047	4954.69	2	0	1	0	0	0	0.0145411
8049	4954.73	2	0	1	0	0	0	0.014576
8051	4954.76	2	0	1	0	0	0	0.0144857
8053	4954.79	2	0	1	0	0	0	0.0145035
8055	4954.83	2	0	1	0	0	0	0.0144857
8057	4954.86	2	0	1	0	0	0	0.0144693
8059	4954.89	2	0	1	0	0	0	0.0144693
8061	4954.93	2	0	1	0	0	0	0.0144756
8063	4954.96	2	0	1	0	0	0	0.0144327
8065	4954.99	2	0	1	0	0	0	0.0144668
8067	4955.03	2	0	1	0	0	0	0.0144972
8069	4955.06	2	0	1	0	0	0	0.0144525
8071	4955.09	2	0	1	0	0	0	0.0144818
8073	4955.13	2	0	1	0	0	0	0.0144494
8075	4955.16	2	0	1	0	0	0	0.0144543
8077	4955.19	2	0	1	0	0	0	0.0144233
8079	4955.23	2	0	1	0	0	0	0.0144888
8081	4955.26	2	0	1	0	0	0	0.0144163
8083	4955.29	2	0	1	0	0	0	0.0144278
8085	4955.33	2	0	1	0	0	0	0.0144424
8087	4955.36	2	0	1	0	0	0	0.014411
8089	4955.39	2	0	1	0	0	0	0.0144442
8091	4955.43	2	0	1	0	0	0	0.0144316
8093	4955.46	2	0	1	0	0	0	0.014448
8095	4955.49	2	0	1	0	0	0	0.0144818
8097	4955.53	2	0	1	0	0	0	0.0144508
8099	4955.56	2	0	1	0	0	0	0.0144389
8101	4955.59	2	0	1	0	0	0	0.0144117
8103	4955.63	2	0	1	0	0	0	0.0144546
8105	4955.66	2	0	1	0	0	0	0.0144602
8107	4955.69	2	0	1	0	0	0	0.0144302
8109	4955.73	2	0	1	0	0	0	0.014447
8111	4955.76	2	0	1	0	0	0	0.0144055
8113	4955.79	2	0	1	0	0	0	0.0144177
8115	4955.83	2	0	1	0	0	0	0.0143152
8117	4955.86	2	0	1	0	0	0	0.0143709
8119	4955.89	2	0	1	0	0	0	0.0143685
8121	4955.93	2	0	1	0	0	0	0.014358
8123	4955.96	2	0	1	0	0	0	0.01447
8125	4955.99	2	0	1	0	0	0	0.0144525
8127	4956.03	2	0	1	0	0	0	0.0144825
8129	4956.06	2	0	1	0	0	0	0.0145481
8131	4956.09	2	0	1	0	0	0	0.0146046
8133	4956.13	2	0	1	0	0	0	0.0145784
8135	4956.16	2	0	1	0	0	0	0.0145763
8137	4956.19	2	0	1	0	0	0	0.0145875
8139	4956.23	2	0	1	0	0	0	0.0145484
8141	4956.26	2	0	1	0	0	0	0.0145327
8143	4956.29	2	0	1	0	0	0	0.0145777
8145	4956.33	2	0	1	0	0	0	0.0145463
8147	4956.36	2	0	1	0	0	0	0.0144689
8149	4956.39	2	0	1	0	0	0	0.0144815
8151	4956.43	2	0	1	0	0	0	0.0144686
8153	4956.46	2	0	1	0	0	0	0.0144187
8155	4956.49	2	0	1	0	0	0	0.0144982
8157	4956.53	2	0	1	0	0	0	0.0144728
8159	4956.56	2	0	1	0	0	0	0.014441
8161	4956.59	2	0	1	0	0	0	0.0145314
8163	4956.63	2	0	1	0	0	0	0.0144641
8165	4956.66	2	0	1	0	0	0	0.0144578
8167	4956.69	2	0	1	0	0	0	0.0144982
8169	4956.73	2	0	1	0	0	0	0.0144438
8171	4956.76	2	0	1	0	0	0	0.0144609
8173	4956.79	2	0	1	0	0	0	0.0144738
8175	4956.83	2	0	1	0	0	0	0.0144396
8177	4956.86	2	0	1	0	0	0	0.0144634
8179	4956.89	2	0	1	0	0	0	0.0145247
8181	4956.93	2	0	1	0	0	0	0.0144926
8183	4956.96	2	0	1	0	0	0	0.0145226
8185	4956.99	2	0	1	0	0	0	0.0144212
8187	4957.03	2	0	1	0	0	0	0.014417
8189	4957.06	2	0	1	0	0	0	0.0144414
8191	4957.09	2	0	1	0	0	0	0.0144226
8193	4957.13	2	0	1	0	0	0	0.0144613
8195	4957.16	2	0	1	0	0	0	0.0144613
8197	4957.19	2	0	1	0	0	0	0.0144142
8199	4957.23	2	0	1	0	0	0	0.0144358
8201	4957.26	2	0	1	0	0	0	0.0144138
8203	4957.29	2	0	1	0	0	0	0.0143709
8205	4957.33	2	0	1	0	0	0	0.0143873
8207	4957.36	2	0	1	0	0	0	0.0143762
8209	4957.39	2	0	1	0	0	0	0.0143378
8211	4957.43	2	0	1	0	0	0	0.0143626
8213	4957.46	2	0	1	0	0	0	0.0143845
8215	4957.49	2	0	1	0	0	0	0.014312
8217	4957.53	2	0	1	0	0	0	0.0142831
8219	4957.56	2	0	1	0	0	0	0.0143413
8221	4957.59	2	0	1	0	0	0	0.0143368
8223	4957.63	2	0	1	0	0	0	0.0143371
8225	4957.66	2	0	1	0	0	0	0.0143169
8227	4957.69	2	0	1	0	0	0	0.0143274
8229	4957.73	2	0	1	0	0	0	0.0143549
8231	4957.76	2	0	1	0	0	0	0.0143511
8233	4957.79	2	0	1	0	0	0	0.0143103
8235	4957.83	2	0	1	0	0	0	0.0143267
8237	4957.86	2	0	1	0	0	0	0.0143214
8239	4957.89	2	0	1	0	0	0	0.0143033
8241	4957.93	2	0	1	0	0	0	0.0143371
8243	4957.96	2	0	1	0	0	0	0.0142834
8245	4957.99	2	0	1	0	0	0	0.0143138
8247	4958.03	2	0	1	0	0	0	0.014341
8249	4958.06	2	0	1	0	0	0	0.0144198
8251	4958.09	2	0	1	0	0	0	0.0144114
8253	4958.13	2	0	1	0	0	0	0.014447
8255	4958.16	2	0	1	0	0	0	0.0144728
8257	4958.19	2	0	1	0	0	0	0.0145118
8259	4958.23	2	0	1	0	0	0	0.014477
8261	4958.26	2	0	1	0	0	0	0.0144271
8263	4958.29	2	0	1	0	0	0	0.0143521
8265	4958.33	2	0	1	0	0	0	0.0143469
8267	4958.36	2	0	1	0	0	0	0.0143476
8269	4958.39	2	0	1	0	0	0	0.01438
8271	4958.43	2	0	1	0	0	0	0.0143263
8273	4958.46	2	0	1	0	0	0	0.0143598
8275	4958.49	2	0	1	0	0	0	0.0143744
8277	4958.53	2	0	1	0	0	0	0.0143295
8279	4958.56	2	0	1	0	0	0	0.0143689
8281	4958.59	2	0	1	0	0	0	0.0143267
8283	4958.63	2	0	1	0	0	0	0.0143755
8285	4958.66	2	0	1	0	0	0	0.0144006
8287	4958.69	2	0	1	0	0	0	0.0143511
8289	4958.73	2	0	1	0	0	0	0.0143155
8291	4958.76	2	0	1	0	0	0	0.0143054
8293	4958.79	2	0	1	0	0	0	0.0143291
8295	4958.83	2	0	1	0	0	0	0.0143678
8297	4958.86	2	0	1	0	0	0	0.0143197
8299	4958.89	2	0	1	0	0	0	0.0143301
8301	4958.93	2	0	1	0	0	0	0.0143567
8303	4958.96	2	0	1	0	0	0	0.0143406
8305	4958.99	2	0	1	0	0	0	0.0143758
8307	4959.03	2	0	1	0	0	0	0.014319
8309	4959.06	2	0	1	0	0	0	0.0143832
8311	4959.09	2	0	1	0	0	0	0.0143901
8313	4959.12	2	0	1	0	0	0	0.0143629
8315	4959.16	2	0	1	0	0	0	0.0144393
8317	4959.19	2	0	1	0	0	0	0.0144194
8319	4959.22	2	0	1	0	0	0	0.0144972
8321	4959.26	2	0	1	0	0	0	0.0145484
8323	4959.29	2	0	1	0	0	0	0.0145924
8325	4959.32	2	0	1	0	0	0	0.0146039
8327	4959.36	2	0	1	0	0	0	0.0146433
8329	4959.39	2	0	1	0	0	0	0.0146963
8331	4959.42	2	0	1	0	0	0	0.0146593
8333	4959.46	2	0	1	0	0	0	0.0146649
8335	4959.49	2	0	1	0	0	0	0.0146952
8337	4959.52	2	0	1	0	0	0	0.0147183
8339	4959.56	2	0	1	0	0	0	0.0146984
8341	4959.59	2	0	1	0	0	0	0.0147465
8343	4959.62	2	0	1	0	0	0	0.0147312
8345	4959.66	2	0	1	0	0	0	0.0146757
8347	4959.69	2	0	1	0	0	0	0.0147047
8349	4959.72	2	0	1	0	0	0	0.0146994
8351	4959.76	2	0	1	0	0	0	0.0147486
8353	4959.79	2	0	1	0	0	0	0.0147001
8355	4959.82	2	0	1	0	0	0	0.0146939
8357	4959.86	2	0	1	0	0	0	0.0146914
8359	4959.89	2	0	1	0	0	0	0.0147015
8361	4959.92	2	0	1	0	0	0	0.0147312
8363	4959.96	2	0	1	0	0	0	0.0147165
8365	4959.99	2	0	1	0	0	0	0.0147252
8367	4960.02	2	0	1	0	0	0	0.0147524
8369	4960.06	2	0	1	0	0	0	0.0147427
8371	4960.09	2	0	1	0	0	0	0.0147946
8373	4960.12	2	0	1	0	0	0	0.0147374
8375	4960.16	2	0	1	0	0	0	0.0147653
8377	4960.19	2	0	1	0	0	0	0.0147448
8379	4960.22	2	0	1	0	0	0	0.0147563
8381	4960.26	2	0	1	0	0	0	0.01481
8383	4960.29	2	0	1	0	0	0	0.0147615
8385	4960.32	2	0	1	0	0	0	0.0146628
8387	4960.36	2	0	1	0	0	0	0.0147563
8389	4960.39	2	0	1	0	0	0	0.0147054
8391	4960.42	2	0	1	0	0	0	0.0147116
8393	4960.46	2	0	1	0	0	0	0.0146653
8395	4960.49	2	0	1	0	0	0	0.014674
8397	4960.52	2	0	1	0	0	0	0.0146855
8399	4960.56	2	0	1	0	0	0	0.0146687
8401	4960.59	2	0	1	0	0	0	0.0146422
8403	4960.62	2	0	1	0	0	0	0.0146524
8405	4960.66	2	0	1	0	0	0	0.0145708
8407	4960.69	2	0	1	0	0	0	0.0145941
8409	4960.72	2	0	1	0	0	0	0.0145871
8411	4960.76	2	0	1	0	0	0	0.0146531
8413	4960.79	2	0	1	0	0	0	0.0146701
8415	4960.82	2	0	1	0	0	0	0.0146384
8417	4960.86	2	0	1	0	0	0	0.0146677
8419	4960.89	2	0	1	0	0	0	0.0146611
8421	4960.92	2	0	1	0	0	0	0.0146942
8423	4960.96	2	0	1	0	0	0	0.0146335
8425	4960.99	2	0	1	0	0	0	0.014577
8427	4961.02	2	0	1	0	0	0	0.0146053
8429	4961.06	2	0	1	0	0	0	0.0146335
8431	4961.09	2	0	1	0	0	0	0.0146639
8433	4961.12	2	0	1	0	0	0	0.0146876
8435	4961.16	2	0	1	0	0	0	0.0146426
8437	4961.19	2	0	1	0	0	0	0.0145976
8439	4961.22	2	0	1	0	0	0	0.0145892
8441	4961.26	2	0	1	0	0	0	0.0145896
8443	4961.29	2	0	1	0	0	0	0.0146157
8445	4961.32	2	0	1	0	0	0	0.0145945
8447	4961.36	2	0	1	0	0	0	0.0146116
8449	4961.39	2	0	1	0	0	0	0.0145491
8451	4961.42	2	0	1	0	0	0	0.0146053
8453	4961.46	2	0	1	0	0	0	0.0145742
8455	4961.49	2	0	1	0	0	0	0.0145443
8457	4961.52	2	0	1	0	0	0	0.0145376
8459	4961.56	2	0	1	0	0	0	0.0145446
8461	4961.59	2	0	1	0	0	0	0.0145666
8463	4961.62	2	0	1	0	0	0	0.0146161
8465	4961.66	2	0	1	0	0	0	0.0146447
8467	4961.69	2	0	1	0	0	0	0.0146098
8469	4961.72	2	0	1	0	0	0	0.014592
8471	4961.76	2	0	1	0	0	0	0.0146154
8473	4961.79	2	0	1	0	0	0	0.0146262
8475	4961.82	2	0	1	0	0	0	0.0146747
8477	4961.86	2	0	1	0	0	0	0.0147054
8479	4961.89	2	0	1	0	0	0	0.0147144
8481	4961.92	2	0	1	0	0	0	0.01469
8483	4961.96	2	0	1	0	0	0	0.0147008
8485	4961.99	2	0	1	0	0	0	0.0147008
8487	4962.02	2	0	1	0	0	0	0.0146939
8489	4962.06	2	0	1	0	0	0	0.0146893
8491	4962.09	2	0	1	0	0	0	0.014689
8493	4962.12	2	0	1	0	0	0	0.0146893
8495	4962.16	2	0	1	0	0	0	0.0146994
8497	4962.19	2	0	1	0	0	0	0.0146841
8499	4962.22	2	0	1	0	0	0	0.0146687
8501	4962.26	2	0	1	0	0	0	0.0146872
8503	4962.29	2	0	1	0	0	0	0.0146764
8505	4962.32	2	0	1	0	0	0	0.0146701
8507	4962.36	2	0	1	0	0	0	0.0147367
8509	4962.39	2	0	1	0	0	0	0.0147622
8511	4962.42	2	0	1	0	0	0	0.0147643
8513	4962.46	2	0	1	0	0	0	0.0147378
8515	4962.49	2	0	1	0	0	0	0.0146778
8517	4962.52	2	0	1	0	0	0	0.0147367
8519	4962.56	2	0	1	0	0	0	0.0147043
8521	4962.59	2	0	1	0	0	0	0.0146789
8523	4962.62	2	0	1	0	0	0	0.0146593
8525	4962.66	2	0	1	0	0	0	0.0146579
8527	4962.69	2	0	1	0	0	0	0.0146412
8529	4962.72	2	0	1	0	0	0	0.0145774
8531	4962.76	2	0	1	0	0	0	0.0145871
8533	4962.79	2	0	1	0	0	0	0.0145941
8535	4962.82	2	0	1	0	0	0	0.0146116
8537	4962.86	2	0	1	0	0	0	0.0146339
8539	4962.89	2	0	1	0	0	0	0.0145941
8541	4962.92	2	0	1	0	0	0	0.0145676
8543	4962.96	2	0	1	0	0	0	0.0145847
8545	4962.99	2	0	1	0	0	0	0.0145666
8547	4963.02	2	0	1	0	0	0	0.014553
8549	4963.06	2	0	1	0	0	0	0.0145202
8551	4963.09	2	0	1	0	0	0	0.0145334
8553	4963.12	2	0	1	0	0	0	0.0145673
8555	4963.16	2	0	1	0	0	0	0.0145833
8557	4963.19	2	0	1	0	0	0	0.0145844
8559	4963.22	2	0	1	0	0	0	0.0145812
8561	4963.26	2	0	1	0	0	0	0.014592
8563	4963.29	2	0	1	0	0	0	0.0145631
8565	4963.32	2	0	1	0	0	0	0.0146067
8567	4963.36	2	0	1	0	0	0	0.0146056
8569	4963.39	2	0	1	0	0	0	0.0146025
8571	4963.42	2	0	1	0	0	0	0.0145955
8573	4963.46	2	0	1	0	0	0	0.0146025
8575	4963.49	2	0	1	0	0	0	0.0145523
8577	4963.52	2	0	1	0	0	0	0.0145955
8579	4963.56	2	0	1	0	0	0	0.0145268
8581	4963.59	2	0	1	0	0	0	0.0145502
8583	4963.62	2	0	1	0	0	0	0.0145275
8585	4963.66	2	0	1	0	0	0	0.0144811
8587	4963.69	2	0	1	0	0	0	0.0144414
8589	4963.72	2	0	1	0	0	0	0.0144717
8591	4963.76	2	0	1	0	0	0	0.014424
8593	4963.79	2	0	1	0	0	0	0.0144965
8595	4963.82	2	0	1	0	0	0	0.0144585
8597	4963.86	2	0	1	0	0	0	0.0144871
8599	4963.89	2	0	1	0	0	0	0.0145317
8601	4963.92	2	0	1	0	0	0	0.0144846
8603	4963.96	2	0	1	0	0	0	0.0145854
8605	4963.99	2	0	1	0	0	0	0.0146028
8607	4964.02	2	0	1	0	0	0	0.0145962
8609	4964.06	2	0	1	0	0	0	0.0146074
8611	4964.09	2	0	1	0	0	0	0.014545
8613	4964.12	2	0	1	0	0	0	0.0145519
8615	4964.16	2	0	1	0	0	0	0.0145216
8617	4964.19	2	0	1	0	0	0	0.0145069
8619	4964.22	2	0	1	0	0	0	0.0144696
8621	4964.26	2	0	1	0	0	0	0.0145401
8623	4964.29	2	0	1	0	0	0	0.0145139
8625	4964.32	2	0	1	0	0	0	0.014523
8627	4964.36	2	0	1	0	0	0	0.0144679
8629	4964.39	2	0	1	0	0	0	0.0145042
8631	4964.42	2	0	1	0	0	0	0.0144616
8633	4964.46	2	0	1	0	0	0	0.0144574
8635	4964.49	2	0	1	0	0	0	0.0144679
8637	4964.52	2	0	1	0	0	0	0.0144201
8639	4964.56	2	0	1	0	0	0	0.0144539
8641	4964.59	2	0	1	0	0	0	0.0143957
8643	4964.62	2	0	1	0	0	0	0.0144288
8645	4964.66	2	0	1	0	0	0	0.0143947
8647	4964.69	2	0	1	0	0	0	0.0144665
8649	4964.72	2	0	1	0	0	0	0.0144825
8651	4964.76	2	0	1	0	0	0	0.0144975
8653	4964.79	2	0	1	0	0	0	0.0144299
8655	4964.82	2	0	1	0	0	0	0.0144069
8657	4964.86	2	0	1	0	0	0	0.0144498
8659	4964.89	2	0	1	0	0	0	0.0143995
8661	4964.92	2	0	1	0	0	0	0.0143546
8663	4964.96	2	0	1	0	0	0	0.0143772
8665	4964.99	2	0	1	0	0	0	0.0144166
8667	4965.02	2	0	1	0	0	0	0.0144145
8669	4965.06	2	0	1	0	0	0	0.0143978
8671	4965.09	2	0	1	0	0	0	0.0143207
8673	4965.12	2	0	1	0	0	0	0.0143758
8675	4965.16	2	0	1	0	0	0	0.0144149
8677	4965.19	2	0	1	0	0	0	0.0143521
8679	4965.22	2	0	1	0	0	0	0.0144208
8681	4965.26	2	0	1	0	0	0	0.0142803
8683	4965.29	2	0	1	0	0	0	0.0143818
8685	4965.32	2	0	1	0	0	0	0.0143451
8687	4965.36	2	0	1	0	0	0	0.0143835
8689	4965.39	2	0	1	0	0	0	0.0143692
8691	4965.42	2	0	1	0	0	0	0.0143608
8693	4965.46	2	0	1	0	0	0	0.0143043
8695	4965.49	2	0	1	0	0	0	0.0143382
8697	4965.52	2	0	1	0	0	0	0.014479
8699	4965.56	2	0	1	0	0	0	0.0144874
8701	4965.59	2	0	1	0	0	0	0.0145606
8703	4965.62	2	0	1	0	0	0	0.0145729
8705	4965.66	2	0	1	0	0	0	0.0145593
8707	4965.69	2	0	1	0	0	0	0.0145042
8709	4965.72	2	0	1	0	0	0	0.014493
8711	4965.76	2	0	1	0	0	0	0.0145962
8713	4965.79	2	0	1	0	0	0	0.014547
8715	4965.82	2	0	1	0	0	0	0.0145042
8717	4965.86	2	0	1	0	0	0	0.0145094
8719	4965.89	2	0	1	0	0	0	0.0144878
8721	4965.92	2	0	1	0	0	0	0.0145387
8723	4965.96	2	0	1	0	0	0	0.0145544
8725	4965.99	2	0	1	0	0	0	0.0145191
8727	4966.02	2	0	1	0	0	0	0.0145791
8729	4966.06	2	0	1	0	0	0	0.0145495
8731	4966.09	2	0	1	0	0	0	0.0145673
8733	4966.12	2	0	1	0	0	0	0.014599
8735	4966.16	2	0	1	0	0	0	0.0145976
8737	4966.19	2	0	1	0	0	0	0.0145111
8739	4966.22	2	0	1	0	0	0	0.0145035
8741	4966.26	2	0	1	0	0	0	0.0145115
8743	4966.29	2	0	1	0	0	0	0.0145645
8745	4966.32	2	0	1	0	0	0	0.014621
8747	4966.36	2	0	1	0	0	0	0.0146279
8749	4966.39	2	0	1	0	0	0	0.0146586
8751	4966.42	2	0	1	0	0	0	0.0146475
8753	4966.46	2	0	1	0	0	0	0.0146325
8755	4966.49	2	0	1	0	0	0	0.0145599
8757	4966.52	2	0	1	0	0	0	0.0144637
8759	4966.56	2	0	1	0	0	0	0.0144989
8761	4966.59	2	0	1	0	0	0	0.0145572
8763	4966.62	2	0	1	0	0	0	0.0146562
8765	4966.66	2	0	1	0	0	0	0.0146809
8767	4966.69	2	0	1	0	0	0	0.0147061
8769	4966.72	2	0	1	0	0	0	0.0146429
8771	4966.76	2	0	1	0	0	0	0.0146039
8773	4966.79	2	0	1	0	0	0	0.0146074
8775	4966.82	2	0	1	0	0	0	0.0146893
8777	4966.86	2	0	1	0	0	0	0.0147176
8779	4966.89	2	0	1	0	0	0	0.0148107
8781	4966.92	2	0	1	0	0	0	0.0147706
8783	4966.96	2	0	1	0	0	0	0.0148121
8785	4966.99	2	0	1	0	0	0	0.0148082
8787	4967.02	2	0	1	0	0	0	0.0147741
8789	4967.06	2	0	1	0	0	0	0.0147908
8791	4967.09	2	0	1	0	0	0	0.0147531
8793	4967.12	2	0	1	0	0	0	0.0148253
8795	4967.16	2	0	1	0	0	0	0.0147971
8797	4967.19	2	0	1	0	0	0	0.0147817
8799	4967.22	2	0	1	0	0	0	0.0148051
8801	4967.26	2	0	1	0	0	0	0.0148281
8803	4967.29	2	0	1	0	0	0	0.0148407
8805	4967.32	2	0	1	0	0	0	0.0147971
8807	4967.36	2	0	1	0	0	0	0.0147831
8809	4967.39	2	0	1	0	0	0	0.0147901
8811	4967.42	2	0	1	0	0	0	0.0147549
8813	4967.46	2	0	1	0	0	0	0.0147793
8815	4967.49	2	0	1	0	0	0	0.0147608
8817	4967.52	2	0	1	0	0	0	0.014728
8819	4967.56	2	0	1	0	0	0	0.0147503
8821	4967.59	2	0	1	0	0	0	0.014781
8823	4967.62	2	0	1	0	0	0	0.0147347
8825	4967.66	2	0	1	0	0	0	0.0147378
8827	4967.69	2	0	1	0	0	0	0.0146844
8829	4967.72	2	0	1	0	0	0	0.0147001
8831	4967.76	2	0	1	0	0	0	0.0147273
8833	4967.79	2	0	1	0	0	0	0.0147455
8835	4967.82	2	0	1	0	0	0	0.0147287
8837	4967.86	2	0	1	0	0	0	0.0147099
8839	4967.89	2	0	1	0	0	0	0.0147228
8841	4967.92	2	0	1	0	0	0	0.0147068
8843	4967.96	2	0	1	0	0	0	0.0147078
8845	4967.99	2	0	1	0	0	0	0.01469
8847	4968.02	2	0	1	0	0	0	0.0146105
8849	4968.06	2	0	1	0	0	0	0.0146185
8851	4968.09	2	0	1	0	0	0	0.0146053
8853	4968.12	2	0	1	0	0	0	0.0146524
8855	4968.16	2	0	1	0	0	0	0.0146314
8857	4968.19	2	0	1	0	0	0	0.0146147
8859	4968.22	2	0	1	0	0	0	0.0146422
8861	4968.26	2	0	1	0	0	0	0.0146307
8863	4968.29	2	0	1	0	0	0	0.0146653
8865	4968.32	2	0	1	0	0	0	0.0146102
8867	4968.36	2	0	1	0	0	0	0.0146259
8869	4968.39	2	0	1	0	0	0	0.0146161
8871	4968.42	2	0	1	0	0	0	0.0146517
8873	4968.46	2	0	1	0	0	0	0.0145987
8875	4968.49	2	0	1	0	0	0	0.0145837
8877	4968.52	2	0	1	0	0	0	0.014591
8879	4968.56	2	0	1	0	0	0	0.014667
8881	4968.59	2	0	1	0	0	0	0.0146952
8883	4968.62	2	0	1	0	0	0	0.0146614
8885	4968.66	2	0	1	0	0	0	0.014644
8887	4968.69	2	0	1	0	0	0	0.0146342
8889	4968.72	2	0	1	0	0	0	0.0146841
8891	4968.76	2	0	1	0	0	0	0.0146325
8893	4968.79	2	0	1	0	0	0	0.0146255
8895	4968.82	2	0	1	0	0	0	0.0146095
8897	4968.86	2	0	1	0	0	0	0.0146039
8899	4968.89	2	0	1	0	0	0	0.0145969
8901	4968.92	2	0	1	0	0	0	0.0145516
8903	4968.96	2	0	1	0	0	0	0.0145781
8905	4968.99	2	0	1	0	0	0	0.0145415
8907	4969.02	2	0	1	0	0	0	0.0144801
8909	4969.06	2	0	1	0	0	0	0.0144759
8911	4969.09	2	0	1	0	0	0	0.0144909
8913	4969.12	2	0	1	0	0	0	0.014516
8915	4969.16	2	0	1	0	0	0	0.0144878
8917	4969.19	2	0	1	0	0	0	0.014479
8919	4969.22	2	0	1	0	0	0	0.0144989
8921	4969.26	2	0	1	0	0	0	0.0145097
8923	4969.29	2	0	1	0	0	0	0.0145275
8925	4969.32	2	0	1	0	0	0	0.0144316
8927	4969.36	2	0	1	0	0	0	0.0144491
8929	4969.39	2	0	1	0	0	0	0.0144822
8931	4969.42	2	0	1	0	0	0	0.0145017
8933	4969.46	2	0	1	0	0	0	0.0144899
8935	4969.49	2	0	1	0	0	0	0.0144351
8937	4969.52	2	0	1	0	0	0	0.0144661
8939	4969.56	2	0	1	0	0	0	0.0144797
8941	4969.59	2	0	1	0	0	0	0.0145083
8943	4969.62	2	0	1	0	0	0	0.0144864
8945	4969.66	2	0	1	0	0	0	0.0145167
8947	4969.69	2	0	1	0	0	0	0.0144222
8949	4969.72	2	0	1	0	0	0	0.0144376
8951	4969.76	2	0	1	0	0	0	0.0143995
8953	4969.79	2	0	1	0	0	0	0.0144288
8955	4969.82	2	0	1	0	0	0	0.0144124
8957	4969.86	2	0	1	0	0	0	0.0144152
8959	4969.89	2	0	1	0	0	0	0.014456
8961	4969.92	2	0	1	0	0	0	0.0144508
8963	4969.96	2	0	1	0	0	0	0.0144567
8965	4969.99	2	0	1	0	0	0	0.0145355
8967	4970.02	2	0	1	0	0	0	0.0144773
8969	4970.06	2	0	1	0	0	0	0.0144993
8971	4970.09	2	0	1	0	0	0	0.0145038
8973	4970.12	2	0	1	0	0	0	0.0144735
8975	4970.16	2	0	1	0	0	0	0.0144906
8977	4970.19	2	0	1	0	0	0	0.0144522
8979	4970.22	2	0	1	0	0	0	0.014455
8981	4970.26	2	0	1	0	0	0	0.0144641
8983	4970.29	2	0	1	0	0	0	0.0144756
8985	4970.32	2	0	1	0	0	0	0.0144651
8987	4970.36	2	0	1	0	0	0	0.0143891
8989	4970.39	2	0	1	0	0	0	0.0143622
8991	4970.42	2	0	1	0	0	0	0.0143685
8993	4970.46	2	0	1	0	0	0	0.014388
8995	4970.49	2	0	1	0	0	0	0.0144135
8997	4970.52	2	0	1	0	0	0	0.0144428
8999	4970.56	2	0	1	0	0	0	0.014387
9001	4970.59	2	0	1	0	0	0	0.0143507
9003	4970.62	2	0	1	0	0	0	0.0143968
9005	4970.66	2	0	1	0	0	0	0.0144226
9007	4970.69	2	0	1	0	0	0	0.0143514
9009	4970.72	2	0	1	0	0	0	0.0143406
9011	4970.76	2	0	1	0	0	0	0.0143643
9013	4970.79	2	0	1	0	0	0	0.0143612
9015	4970.82	2	0	1	0	0	0	0.014394
9017	4970.86	2	0	1	0	0	0	0.0143978
9019	4970.89	2	0	1	0	0	0	0.0143877
9021	4970.92	2	0	1	0	0	0	0.0143835
9023	4970.96	2	0	1	0	0	0	0.0143786
9025	4970.99	2	0	1	0	0	0	0.0144177
9027	4971.02	2	0	1	0	0	0	0.0144166
9029	4971.06	2	0	1	0	0	0	0.0144121
9031	4971.09	2	0	1	0	0	0	0.0144672
9033	4971.12	2	0	1	0	0	0	0.0144194
9035	4971.16	2	0	1	0	0	0	0.0144703
9037	4971.19	2	0	1	0	0	0	0.0145205
9039	4971.22	2	0	1	0	0	0	0.0144682
9041	4971.26	2	0	1	0	0	0	0.014515
9043	4971.29	2	0	1	0	0	0	0.0144466
9045	4971.32	2	0	1	0	0	0	0.0145052
9047	4971.36	2	0	1	0	0	0	0.0145017
9049	4971.39	2	0	1	0	0	0	0.0145491
9051	4971.42	2	0	1	0	0	0	0.0145526
9053	4971.46	2	0	1	0	0	0	0.0144654
9055	4971.49	2	0	1	0	0	0	0.0144926
9057	4971.52	2	0	1	0	0	0	0.0144944
9059	4971.56	2	0	1	0	0	0	0.0145031
9061	4971.59	2	0	1	0	0	0	0.0144763
9063	4971.62	2	0	1	0	0	0	0.0144808
9065	4971.66	2	0	1	0	0	0	0.014455
9067	4971.69	2	0	1	0	0	0	0.0144721
9069	4971.72	2	0	1	0	0	0	0.0144564
9071	4971.76	2	0	1	0	0	0	0.0144501
9073	4971.79	2	0	1	0	0	0	0.0144651
9075	4971.82	2	0	1	0	0	0	0.0144773
9077	4971.86	2	0	1	0	0	0	0.0144585
9079	4971.89	2	0	1	0	0	0	0.014447
9081	4971.92	2	0	1	0	0	0	0.0144313
9083	4971.96	2	0	1	0	0	0	0.0144131
9085	4971.99	2	0	1	0	0	0	0.0144295
9087	4972.02	2	0	1	0	0	0	0.0143887
9089	4972.06	2	0	1	0	0	0	0.0144159
9091	4972.09	2	0	1	0	0	0	0.0143619
9093	4972.12	2	0	1	0	0	0	0.0144055
9095	4972.16	2	0	1	0	0	0	0.014424
9097	4972.19	2	0	1	0	0	0	0.01444
9099	4972.22	2	0	1	0	0	0	0.0143573
9101	4972.26	2	0	1	0	0	0	0.0143943
9103	4972.29	2	0	1	0	0	0	0.0144034
9105	4972.32	2	0	1	0	0	0	0.0144107
9107	4972.36	2	0	1	0	0	0	0.0144344
9109	4972.39	2	0	1	0	0	0	0.0143786
9111	4972.42	2	0	1	0	0	0	0.014297
9113	4972.46	2	0	1	0	0	0	0.014403
9115	4972.49	2	0	1	0	0	0	0.0144187
9117	4972.52	2	0	1	0	0	0	0.0144107
9119	4972.56	2	0	1	0	0	0	0.014358
9121	4972.59	2	0	1	0	0	0	0.0143751
9123	4972.62	2	0	1	0	0	0	0.01441
9125	4972.66	2	0	1	0	0	0	0.0143825
9127	4972.69	2	0	1	0	0	0	0.01444
9129	4972.72	2	0	1	0	0	0	0.0144048
9131	4972.76	2	0	1	0	0	0	0.014349
9133	4972.79	2	0	1	0	0	0	0.0143814
9135	4972.82	2	0	1	0	0	0	0.0144721
9137	4972.86	2	0	1	0	0	0	0.0144592
9139	4972.89	2	0	1	0	0	0	0.0144086
9141	4972.92	2	0	1	0	0	0	0.0143999
9143	4972.96	2	0	1	0	0	0	0.0143887
9145	4972.99	2	0	1	0	0	0	0.0143898
9147	4973.02	2	0	1	0	0	0	0.0144313
9149	4973.06	2	0	1	0	0	0	0.0144152
9151	4973.09	2	0	1	0	0	0	0.0144083
9153	4973.12	2	0	1	0	0	0	0.0143546
9155	4973.16	2	0	1	0	0	0	0.0143699
9157	4973.19	2	0	1	0	0	0	0.0143706
9159	4973.22	2	0	1	0	0	0	0.0143852
9161	4973.26	2	0	1	0	0	0	0.0143929
9163	4973.29	2	0	1	0	0	0	0.0143873
9165	4973.32	2	0	1	0	0	0	0.0143382
9167	4973.36	2	0	1	0	0	0	0.014296
9169	4973.39	2	0	1	0	0	0	0.0143197
9171	4973.42	2	0	1	0	0	0	0.01435
9173	4973.46	2	0	1	0	0	0	0.0143577
9175	4973.49	2	0	1	0	0	0	0.0143528
9177	4973.52	2	0	1	0	0	0	0.0142656
9179	4973.56	2	0	1	0	0	0	0.0143134
9181	4973.59	2	0	1	0	0	0	0.0142859
9183	4973.62	2	0	1	0	0	0	0.0143298
9185	4973.66	2	0	1	0	0	0	0.0143354
9187	4973.69	2	0	1	0	0	0	0.0143413
9189	4973.72	2	0	1	0	0	0	0.0143057
9191	4973.76	2	0	1	0	0	0	0.0143186
9193	4973.79	2	0	1	0	0	0	0.0143469
9195	4973.82	2	0	1	0	0	0	0.0143772
9197	4973.86	2	0	1	0	0	0	0.0143598
9199	4973.89	2	0	1	0	0	0	0.0143748
9201	4973.92	2	0	1	0	0	0	0.0143804
9203	4973.96	2	0	1	0	0	0	0.0144117
9205	4973.99	2	0	1	0	0	0	0.0143835
9207	4974.02	2	0	1	0	0	0	0.0143587
9209	4974.06	2	0	1	0	0	0	0.0143772
9211	4974.09	2	0	1	0	0	0	0.0143486
9213	4974.12	2	0	1	0	0	0	0.0143915
9215	4974.16	2	0	1	0	0	0	0.0143685
9217	4974.19	2	0	1	0	0	0	0.0144323
9219	4974.22	2	0	1	0	0	0	0.0143856
9221	4974.26	2	0	1	0	0	0	0.0143807
9223	4974.29	2	0	1	0	0	0	0.0143828
9225	4974.32	2	0	1	0	0	0	0.0144477
9227	4974.36	2	0	1	0	0	0	0.0144592
9229	4974.39	2	0	1	0	0	0	0.014409
9231	4974.42	2	0	1	0	0	0	0.0143727
9233	4974.46	2	0	1	0	0	0	0.0144034
9235	4974.49	2	0	1	0	0	0	0.0144337
9237	4974.52	2	0	1	0	0	0	0.0144414
9239	4974.56	2	0	1	0	0	0	0.0144114
9241	4974.59	2	0	1	0	0	0	0.0143995
9243	4974.62	2	0	1	0	0	0	0.0143852
9245	4974.66	2	0	1	0	0	0	0.0143709
9247	4974.69	2	0	1	0	0	0	0.0143444
9249	4974.72	2	0	1	0	0	0	0.0143448
9251	4974.76	2	0	1	0	0	0	0.0143577
9253	4974.79	2	0	1	0	0	0	0.0143587
9255	4974.82	2	0	1	0	0	0	0.0143043
9257	4974.86	2	0	1	0	0	0	0.0143054
9259	4974.89	2	0	1	0	0	0	0.0142813
9261	4974.92	2	0	1	0	0	0	0.0142611
9263	4974.96	2	0	1	0	0	0	0.0142855
9265	4974.99	2	0	1	0	0	0	0.0143036
9267	4975.02	2	0	1	0	0	0	0.0142639
9269	4975.06	2	0	1	0	0	0	0.0143061
9271	4975.09	2	0	1	0	0	0	0.014282
9273	4975.12	2	0	1	0	0	0	0.0142831
9275	4975.16	2	0	1	0	0	0	0.0142486
9277	4975.19	2	0	1	0	0	0	0.0142506
9279	4975.22	2	0	1	0	0	0	0.0142935
9281	4975.26	2	0	1	0	0	0	0.0142468
9283	4975.29	2	0	1	0	0	0	0.0142308
9285	4975.32	2	0	1	0	0	0	0.0142071
9287	4975.36	2	0	1	0	0	0	0.0141865
9289	4975.39	2	0	1	0	0	0	0.0142248
9291	4975.42	2	0	1	0	0	0	0.0142182
9293	4975.46	2	0	1	0	0	0	0.0141785
9295	4975.49	2	0	1	0	0	0	0.0142109
9297	4975.52	2	0	1	0	0	0	0.0141931
9299	4975.56	2	0	1	0	0	0	0.0141771
9301	4975.59	2	0	1	0	0	0	0.0142081
9303	4975.62	2	0	1	0	0	0	0.0142151
9305	4975.66	2	0	1	0	0	0	0.0142172
9307	4975.69	2	0	1	0	0	0	0.0141837
9309	4975.72	2	0	1	0	0	0	0.0141858
9311	4975.76	2	0	1	0	0	0	0.0141896
9313	4975.79	2	0	1	0	0	0	0.0141826
9315	4975.82	2	0	1	0	0	0	0.0141893
9317	4975.86	2	0	1	0	0	0	0.0141439
9319	4975.89	2	0	1	0	0	0	0.0141425
9321	4975.92	2	0	1	0	0	0	0.0141338
9323	4975.96	2	0	1	0	0	0	0.01413
9325	4975.99	2	0	1	0	0	0	0.0141411
9327	4976.02	2	0	1	0	0	0	0.0141122
9329	4976.06	2	0	1	0	0	0	0.0141119
9331	4976.09	2	0	1	0	0	0	0.0141206
9333	4976.12	2	0	1	0	0	0	0.0142053
9335	4976.16	2	0	1	0	0	0	0.0141349
9337	4976.19	2	0	1	0	0	0	0.0141112
9339	4976.22	2	0	1	0	0	0	0.014183
9341	4976.26	2	0	1	0	0	0	0.0141195
9343	4976.29	2	0	1	0	0	0	0.0141488
9345	4976.32	2	0	1	0	0	0	0.014175
9347	4976.36	2	0	1	0	0	0	0.0141544
9349	4976.39	2	0	1	0	0	0	0.0141499
9351	4976.42	2	0	1	0	0	0	0.0141485
9353	4976.46	2	0	1	0	0	0	0.0141701
9355	4976.49	2	0	1	0	0	0	0.0141753
9357	4976.52	2	0	1	0	0	0	0.0141624
9359	4976.56	2	0	1	0	0	0	0.0140965
9361	4976.59	2	0	1	0	0	0	0.0141603
9363	4976.62	2	0	1	0	0	0	0.0141819
9365	4976.66	2	0	1	0	0	0	0.0141656
9367	4976.69	2	0	1	0	0	0	0.0141523
9369	4976.72	2	0	1	0	0	0	0.0141481
9371	4976.76	2	0	1	0	0	0	0.0141028
9373	4976.79	2	0	1	0	0	0	0.014114
9375	4976.82	2	0	1	0	0	0	0.0141038
9377	4976.86	2	0	1	0	0	0	0.0141174
9379	4976.89	2	0	1	0	0	0	0.0140805
9381	4976.92	2	0	1	0	0	0	0.0141108
9383	4976.96	2	0	1	0	0	0	0.0141338
9385	4976.99	2	0	1	0	0	0	0.0141119
9387	4977.02	2	0	1	0	0	0	0.0141146
9389	4977.06	2	0	1	0	0	0	0.0140847
9391	4977.09	2	0	1	0	0	0	0.0141237
9393	4977.12	2	0	1	0	0	0	0.0140881
9395	4977.16	2	0	1	0	0	0	0.0140721
9397	4977.19	2	0	1	0	0	0	0.0140732
9399	4977.22	2	0	1	0	0	0	0.0140752
9401	4977.26	2	0	1	0	0	0	0.0141049
9403	4977.29	2	0	1	0	0	0	0.0141066
9405	4977.32	2	0	1	0	0	0	0.0141017
9407	4977.36	2	0	1	0	0	0	0.0141324
9409	4977.39	2	0	1	0	0	0	0.0140854
9411	4977.42	2	0	1	0	0	0	0.014131
9413	4977.46	2	0	1	0	0	0	0.0140881
9415	4977.49	2	0	1	0	0	0	0.0141094
9417	4977.52	2	0	1	0	0	0	0.014084
9419	4977.56	2	0	1	0	0	0	0.0141122
9421	4977.59	2	0	1	0	0	0	0.0140414
9423	4977.62	2	0	1	0	0	0	0.0140895
9425	4977.66	2	0	1	0	0	0	0.0140843
9427	4977.69	2	0	1	0	0	0	0.0141136
9429	4977.72	2	0	1	0	0	0	0.0140794
9431	4977.76	2	0	1	0	0	0	0.0140418
9433	4977.79	2	0	1	0	0	0	0.0140543
9435	4977.82	2	0	1	0	0	0	0.0140512
9437	4977.86	2	0	1	0	0	0	0.0140819
9439	4977.89	2	0	1	0	0	0	0.0140561
9441	4977.92	2	0	1	0	0	0	0.0140271
9443	4977.96	2	0	1	0	0	0	0.0140697
9445	4977.99	2	0	1	0	0	0	0.0140561
9447	4978.02	2	0	1	0	0	0	0.0140247
9449	4978.06	2	0	1	0	0	0	0.0140752
9451	4978.09	2	0	1	0	0	0	0.0140606
9453	4978.12	2	0	1	0	0	0	0.0141146
9455	4978.16	2	0	1	0	0	0	0.0141262
9457	4978.19	2	0	1	0	0	0	0.0140596
9459	4978.22	2	0	1	0	0	0	0.0140718
9461	4978.26	2	0	1	0	0	0	0.0140704
9463	4978.29	2	0	1	0	0	0	0.0140738
9465	4978.32	2	0	1	0	0	0	0.0140941
9467	4978.36	2	0	1	0	0	0	0.0141077
9469	4978.39	2	0	1	0	0	0	0.0141052
9471	4978.42	2	0	1	0	0	0	0.0141045
9473	4978.46	2	0	1	0	0	0	0.0140826
9475	4978.49	2	0	1	0	0	0	0.014084
9477	4978.52	2	0	1	0	0	0	0.0140704
9479	4978.56	2	0	1	0	0	0	0.0140847
9481	4978.59	2	0	1	0	0	0	0.0140843
9483	4978.62	2	0	1	0	0	0	0.0140693
9485	4978.66	2	0	1	0	0	0	0.01404
9487	4978.69	2	0	1	0	0	0	0.0140602
9489	4978.72	2	0	1	0	0	0	0.0140589
9491	4978.76	2	0	1	0	0	0	0.0140282
9493	4978.79	2	0	1	0	0	0	0.0140205
9495	4978.82	2	0	1	0	0	0	0.013995
9497	4978.86	2	0	1	0	0	0	0.0139689
9499	4978.89	2	0	1	0	0	0	0.0140348
9501	4978.92	2	0	1	0	0	0	0.0139797
9503	4978.96	2	0	1	0	0	0	0.0139581
9505	4978.99	2	0	1	0	0	0	0.0139923
9507	4979.02	2	0	1	0	0	0	0.0139494
9509	4979.06	2	0	1	0	0	0	0.0139675
9511	4979.09	2	0	1	0	0	0	0.0139448
9513	4979.12	2	0	1	0	0	0	0.0139316
9515	4979.16	2	0	1	0	0	0	0.0139298
9517	4979.19	2	0	1	0	0	0	0.0139644
9519	4979.22	2	0	1	0	0	0	0.0139145
9521	4979.26	2	0	1	0	0	0	0.0139525
9523	4979.29	2	0	1	0	0	0	0.0139002
9525	4979.32	2	0	1	0	0	0	0.013903
9527	4979.36	2	0	1	0	0	0	0.013912
9529	4979.39	2	0	1	0	0	0	0.0139239
9531	4979.42	2	0	1	0	0	0	0.0139302
9533	4979.46	2	0	1	0	0	0	0.0139309
9535	4979.49	2	0	1	0	0	0	0.0139033
9537	4979.52	2	0	1	0	0	0	0.0139375
9539	4979.56	2	0	1	0	0	0	0.013918
9541	4979.59	2	0	1	0	0	0	0.0139323
9543	4979.62	2	0	1	0	0	0	0.0138971
9545	4979.66	2	0	1	0	0	0	0.0139093
9547	4979.69	2	0	1	0	0	0	0.0139037
9549	4979.72	2	0	1	0	0	0	0.013942
9551	4979.76	2	0	1	0	0	0	0.0139459
9553	4979.79	2	0	1	0	0	0	0.0139842
9555	4979.82	2	0	1	0	0	0	0.013957
9557	4979.86	2	0	1	0	0	0	0.0140219
9559	4979.89	2	0	1	0	0	0	0.0141949
9561	4979.92	2	0	1	0	0	0	0.0141921
9563	4979.96	2	0	1	0	0	0	0.0142468
9565	4979.99	2	0	1	0	0	0	0.0142524
9567	4980.02	2	0	1	0	0	0	0.0142325
9569	4980.06	2	0	1	0	0	0	0.0142472
9571	4980.09	2	0	1	0	0	0	0.0142214
9573	4980.12	2	0	1	0	0	0	0.0142172
9575	4980.16	2	0	1	0	0	0	0.014167
9577	4980.19	2	0	1	0	0	0	0.0141331
9579	4980.22	2	0	1	0	0	0	0.0141844
9581	4980.26	2	0	1	0	0	0	0.0142433
9583	4980.29	2	0	1	0	0	0	0.0142817
9585	4980.32	2	0	1	0	0	0	0.0143462
9587	4980.36	2	0	1	0	0	0	0.0143922
9589	4980.39	2	0	1	0	0	0	0.0143413
9591	4980.42	2	0	1	0	0	0	0.0143451
9593	4980.46	2	0	1	0	0	0	0.0143633
9595	4980.49	2	0	1	0	0	0	0.0144104
9597	4980.52	2	0	1	0	0	0	0.0143723
9599	4980.56	2	0	1	0	0	0	0.0144236
9601	4980.59	2	0	1	0	0	0	0.0144288
9603	4980.62	2	0	1	0	0	0	0.014426
9605	4980.66	2	0	1	0	0	0	0.0144037
9607	4980.69	2	0	1	0	0	0	0.0144473
9609	4980.72	2	0	1	0	0	0	0.014409
9611	4980.76	2	0	1	0	0	0	0.0144208
9613	4980.79	2	0	1	0	0	0	0.0144299
9615	4980.82	2	0	1	0	0	0	0.0144567
9617	4980.86	2	0	1	0	0	0	0.0144233
9619	4980.89	2	0	1	0	0	0	0.0144602
9621	4980.92	2	0	1	0	0	0	0.0144044
9623	4980.96	2	0	1	0	0	0	0.0144494
9625	4980.99	2	0	1	0	0	0	0.0144602
9627	4981.02	2	0	1	0	0	0	0.0144682
9629	4981.06	2	0	1	0	0	0	0.0144382
9631	4981.09	2	0	1	0	0	0	0.0144714
9633	4981.12	2	0	1	0	0	0	0.0144477
9635	4981.16	2	0	1	0	0	0	0.0144264
9637	4981.19	2	0	1	0	0	0	0.0144784
9639	4981.22	2	0	1	0	0	0	0.0144707
9641	4981.26	2	0	1	0	0	0	0.0144341
9643	4981.29	2	0	1	0	0	0	0.014486
9645	4981.32	2	0	1	0	0	0	0.0144428
9647	4981.36	2	0	1	0	0	0	0.0144505
9649	4981.39	2	0	1	0	0	0	0.0145143
9651	4981.42	2	0	1	0	0	0	0.0145052
9653	4981.46	2	0	1	0	0	0	0.0145436
9655	4981.49	2	0	1	0	0	0	0.0145481
9657	4981.52	2	0	1	0	0	0	0.0145906
9659	4981.56	2	0	1	0	0	0	0.0145017
9661	4981.59	2	0	1	0	0	0	0.0145003
9663	4981.62	2	0	1	0	0	0	0.0145049
9665	4981.66	2	0	1	0	0	0	0.0145195
9667	4981.69	2	0	1	0	0	0	0.0145132
9669	4981.72	2	0	1	0	0	0	0.0144895
9671	4981.76	2	0	1	0	0	0	0.0145307
9673	4981.79	2	0	1	0	0	0	0.0144961
9675	4981.82	2	0	1	0	0	0	0.0145198
9677	4981.86	2	0	1	0	0	0	0.0144661
9679	4981.89	2	0	1	0	0	0	0.0144825
9681	4981.92	2	0	1	0	0	0	0.0144648
9683	4981.96	2	0	1	0	0	0	0.0144532
9685	4981.99	2	0	1	0	0	0	0.0144853
9687	4982.02	2	0	1	0	0	0	0.0145118
9689	4982.06	2	0	1	0	0	0	0.0144989
9691	4982.09	2	0	1	0	0	0	0.0145087
9693	4982.12	2	0	1	0	0	0	0.0145296
9695	4982.16	2	0	1	0	0	0	0.0145387
9697	4982.19	2	0	1	0	0	0	0.0144937
9699	4982.22	2	0	1	0	0	0	0.0144668
9701	4982.26	2	0	1	0	0	0	0.0144505
9703	4982.29	2	0	1	0	0	0	0.0144512
9705	4982.32	2	0	1	0	0	0	0.0144351
9707	4982.36	2	0	1	0	0	0	0.014479
9709	4982.39	2	0	1	0	0	0	0.0144972
9711	4982.42	2	0	1	0	0	0	0.0145122
9713	4982.46	2	0	1	0	0	0	0.0145317
9715	4982.49	2	0	1	0	0	0	0.0145526
9717	4982.52	2	0	1	0	0	0	0.0145408
9719	4982.56	2	0	1	0	0	0	0.0145373
9721	4982.59	2	0	1	0	0	0	0.0145575
9723	4982.62	2	0	1	0	0	0	0.0145575
9725	4982.66	2	0	1	0	0	0	0.0145669
9727	4982.69	2	0	1	0	0	0	0.0145551
9729	4982.72	2	0	1	0	0	0	0.0145652
9731	4982.76	2	0	1	0	0	0	0.0145941
9733	4982.79	2	0	1	0	0	0	0.0146813
9735	4982.82	2	0	1	0	0	0	0.0145641
9737	4982.86	2	0	1	0	0	0	0.0145739
9739	4982.89	2	0	1	0	0	0	0.0145955
9741	4982.92	2	0	1	0	0	0	0.014577
9743	4982.96	2	0	1	0	0	0	0.0145638
9745	4982.99	2	0	1	0	0	0	0.0145976
9747	4983.02	2	0	1	0	0	0	0.0145265
9749	4983.06	2	0	1	0	0	0	0.0145244
9751	4983.09	2	0	1	0	0	0	0.0145282
9753	4983.12	2	0	1	0	0	0	0.0145488
9755	4983.16	2	0	1	0	0	0	0.0144871
9757	4983.19	2	0	1	0	0	0	0.0144937
9759	4983.22	2	0	1	0	0	0	0.0144916
9761	4983.26	2	0	1	0	0	0	0.0145195
9763	4983.29	2	0	1	0	0	0	0.0145097
9765	4983.32	2	0	1	0	0	0	0.0145083
9767	4983.36	2	0	1	0	0	0	0.0145062
9769	4983.39	2	0	1	0	0	0	0.0145017
9771	4983.42	2	0	1	0	0	0	0.0144975
9773	4983.46	2	0	1	0	0	0	0.0145143
9775	4983.49	2	0	1	0	0	0	0.0145334
9777	4983.52	2	0	1	0	0	0	0.0145237
9779	4983.56	2	0	1	0	0	0	0.014531
9781	4983.59	2	0	1	0	0	0	0.0145383
9783	4983.62	2	0	1	0	0	0	0.0145899
9785	4983.66	2	0	1	0	0	0	0.0145749
9787	4983.69	2	0	1	0	0	0	0.0145722
9789	4983.72	2	0	1	0	0	0	0.0146492
9791	4983.76	2	0	1	0	0	0	0.0146046
9793	4983.79	2	0	1	0	0	0	0.0146039
9795	4983.82	2	0	1	0	0	0	0.0146973
9797	4983.86	2	0	1	0	0	0	0.0146803
9799	4983.89	2	0	1	0	0	0	0.0147088
9801	4983.92	2	0	1	0	0	0	0.0146583
9803	4983.96	2	0	1	0	0	0	0.0147029
9805	4983.99	2	0	1	0	0	0	0.0146945
9807	4984.02	2	0	1	0	0	0	0.0146932
9809	4984.06	2	0	1	0	0	0	0.0146806
9811	4984.09	2	0	1	0	0	0	0.0146858
9813	4984.12	2	0	1	0	0	0	0.0146935
9815	4984.16	2	0	1	0	0	0	0.0146942
9817	4984.19	2	0	1	0	0	0	0.0146966
9819	4984.22	2	0	1	0	0	0	0.0146932
9821	4984.26	2	0	1	0	0	0	0.0146775
9823	4984.29	2	0	1	0	0	0	0.0146339
9825	4984.32	2	0	1	0	0	0	0.0146391
9827	4984.36	2	0	1	0	0	0	0.0146712
9829	4984.39	2	0	1	0	0	0	0.0147109
9831	4984.42	2	0	1	0	0	0	0.0146541
9833	4984.46	2	0	1	0	0	0	0.0146691
9835	4984.49	2	0	1	0	0	0	0.0146328
9837	4984.52	2	0	1	0	0	0	0.0146335
9839	4984.56	2	0	1	0	0	0	0.0146206
9841	4984.59	2	0	1	0	0	0	0.0146367
9843	4984.62	2	0	1	0	0	0	0.014599
9845	4984.66	2	0	1	0	0	0	0.0146154
9847	4984.69	2	0	1	0	0	0	0.0145436
9849	4984.72	2	0	1	0	0	0	0.0146081
9851	4984.76	2	0	1	0	0	0	0.0145575
9853	4984.79	2	0	1	0	0	0	0.0145959
9855	4984.82	2	0	1	0	0	0	0.0145432
9857	4984.86	2	0	1	0	0	0	0.0145439
9859	4984.89	2	0	1	0	0	0	0.0144993
9861	4984.92	2	0	1	0	0	0	0.0145383
9863	4984.96	2	0	1	0	0	0	0.0144923
9865	4984.99	2	0	1	0	0	0	0.0145017
9867	4985.02	2	0	1	0	0	0	0.0145062
9869	4985.06	2	0	1	0	0	0	0.0145038
9871	4985.09	2	0	1	0	0	0	0.0144811
9873	4985.12	2	0	1	0	0	0	0.0144661
9875	4985.16	2	0	1	0	0	0	0.0145296
9877	4985.19	2	0	1	0	0	0	0.0145701
9879	4985.22	2	0	1	0	0	0	0.0145303
9881	4985.26	2	0	1	0	0	0	0.0145209
9883	4985.29	2	0	1	0	0	0	0.0145443
9885	4985.32	2	0	1	0	0	0	0.0145028
9887	4985.36	2	0	1	0	0	0	0.014485
9889	4985.39	2	0	1	0	0	0	0.0144295
9891	4985.42	2	0	1	0	0	0	0.0144672
9893	4985.46	2	0	1	0	0	0	0.01444
9895	4985.49	2	0	1	0	0	0	0.0144567
9897	4985.52	2	0	1	0	0	0	0.0144149
9899	4985.56	2	0	1	0	0	0	0.014463
9901	4985.59	2	0	1	0	0	0	0.0144539
9903	4985.62	2	0	1	0	0	0	0.0144773
9905	4985.66	2	0	1	0	0	0	0.0144428
9907	4985.69	2	0	1	0	0	0	0.0144539
9909	4985.72	2	0	1	0	0	0	0.0144686
9911	4985.76	2	0	1	0	0	0	0.0144156
9913	4985.79	2	0	1	0	0	0	0.0144212
9915	4985.82	2	0	1	0	0	0	0.0143629
9917	4985.86	2	0	1	0	0	0	0.0144023
9919	4985.89	2	0	1	0	0	0	0.0143685
9921	4985.92	2	0	1	0	0	0	0.0143992
9923	4985.96	2	0	1	0	0	0	0.0143479
9925	4985.99	2	0	1	0	0	0	0.0144198
9927	4986.02	2	0	1	0	0	0	0.0143556
9929	4986.06	2	0	1	0	0	0	0.0143835
9931	4986.09	2	0	1	0	0	0	0.0143926
9933	4986.12	2	0	1	0	0	0	0.0143751
9935	4986.16	2	0	1	0	0	0	0.0144194
9937	4986.19	2	0	1	0	0	0	0.0143615
9939	4986.22	2	0	1	0	0	0	0.0143117
9941	4986.26	2	0	1	0	0	0	0.0143521
9943	4986.29	2	0	1	0	0	0	0.0143444
9945	4986.32	2	0	1	0	0	0	0.0143497
9947	4986.36	2	0	1	0	0	0	0.0143598
9949	4986.39	2	0	1	0	0	0	0.0143256
9951	4986.42	2	0	1	0	0	0	0.0143542
9953	4986.46	2	0	1	0	0	0	0.0143518
9955	4986.49	2	0	1	0	0	0	0.0143204
9957	4986.52	2	0	1	0	0	0	0.0143413
9959	4986.56	2	0	1	0	0	0	0.0143783
9961	4986.59	2	0	1	0	0	0	0.0143622
9963	4986.62	2	0	1	0	0	0	0.0144149
9965	4986.66	2	0	1	0	0	0	0.0144152
9967	4986.69	2	0	1	0	0	0	0.0143138
9969	4986.72	2	0	1	0	0	0	0.0143235
9971	4986.76	2	0	1	0	0	0	0.014365
9973	4986.79	2	0	1	0	0	0	0.0143315
9975	4986.82	2	0	1	0	0	0	0.0143636
9977	4986.86	2	0	1	0	0	0	0.0143573
9979	4986.89	2	0	1	0	0	0	0.0142942
9981	4986.92	2	0	1	0	0	0	0.0143301
9983	4986.96	2	0	1	0	0	0	0.0143483
9985	4986.99	2	0	1	0	0	0	0.0143364
9987	4987.02	2	0	1	0	0	0	0.014327
9989	4987.06	2	0	1	0	0	0	0.0143866
9991	4987.09	2	0	1	0	0	0	0.0143424
9993	4987.12	2	0	1	0	0	0	0.0143758
9995	4987.16	2	0	1	0	0	0	0.0143734
9997	4987.19	2	0	1	0	0	0	0.0143758
9999	4987.22	2	0	1	0	0	0	0.0143793
10001	4987.26	2	0	1	0	0	0	0.0143678
10003	4987.29	2	0	1	0	0	0	0.0144149
10005	4987.32	2	0	1	0	0	0	0.0144131
10007	4987.36	2	0	1	0	0	0	0.0144309
10009	4987.39	2	0	1	0	0	0	0.0144362
10011	4987.42	2	0	1	0	0	0	0.0143818
10013	4987.46	2	0	1	0	0	0	0.0144271
10015	4987.49	2	0	1	0	0	0	0.0144546
10017	4987.52	2	0	1	0	0	0	0.0143863
10019	4987.56	2	0	1	0	0	0	0.0144689
10021	4987.59	2	0	1	0	0	0	0.0144205
10023	4987.62	2	0	1	0	0	0	0.0144449
10025	4987.66	2	0	1	0	0	0	0.0144609
10027	4987.69	2	0	1	0	0	0	0.0144564
10029	4987.72	2	0	1	0	0	0	0.0144885
10031	4987.76	2	0	1	0	0	0	0.0144728
10033	4987.79	2	0	1	0	0	0	0.0144801
10035	4987.82	2	0	1	0	0	0	0.0144759
10037	4987.86	2	0	1	0	0	0	0.0144937
10039	4987.89	2	0	1	0	0	0	0.014456
10041	4987.92	2	0	1	0	0	0	0.0145352
10043	4987.96	2	0	1	0	0	0	0.0144574
10045	4987.99	2	0	1	0	0	0	0.0144585
10047	4988.02	2	0	1	0	0	0	0.0144836
10049	4988.06	2	0	1	0	0	0	0.0144648
10051	4988.09	2	0	1	0	0	0	0.0144825
10053	4988.12	2	0	1	0	0	0	0.0144794
10055	4988.16	2	0	1	0	0	0	0.0144233
10057	4988.19	2	0	1	0	0	0	0.014424
10059	4988.22	2	0	1	0	0	0	0.0144578
10061	4988.26	2	0	1	0	0	0	0.0144654
10063	4988.29	2	0	1	0	0	0	0.0143891
10065	4988.32	2	0	1	0	0	0	0.0143706
10067	4988.36	2	0	1	0	0	0	0.0143845
10069	4988.39	2	0	1	0	0	0	0.0144219
10071	4988.42	2	0	1	0	0	0	0.0144351
10073	4988.46	2	0	1	0	0	0	0.01441
10075	4988.49	2	0	1	0	0	0	0.014426
10077	4988.52	2	0	1	0	0	0	0.0144184
10079	4988.56	2	0	1	0	0	0	0.0143922
10081	4988.59	2	0	1	0	0	0	0.0144191
10083	4988.62	2	0	1	0	0	0	0.014432
10085	4988.66	2	0	1	0	0	0	0.0144253
10087	4988.69	2	0	1	0	0	0	0.0144313
10089	4988.72	2	0	1	0	0	0	0.0144728
10091	4988.76	2	0	1	0	0	0	0.014486
10093	4988.79	2	0	1	0	0	0	0.0144756
10095	4988.82	2	0	1	0	0	0	0.0143961
10097	4988.86	2	0	1	0	0	0	0.0144627
10099	4988.89	2	0	1	0	0	0	0.0144546
10101	4988.92	2	0	1	0	0	0	0.0144121
10103	4988.96	2	0	1	0	0	0	0.0144194
10105	4988.99	2	0	1	0	0	0	0.0144267
10107	4989.02	2	0	1	0	0	0	0.0144372
10109	4989.06	2	0	1	0	0	0	0.0144627
10111	4989.09	2	0	1	0	0	0	0.0144916
10113	4989.12	2	0	1	0	0	0	0.0144728
10115	4989.16	2	0	1	0	0	0	0.0145122
10117	4989.19	2	0	1	0	0	0	0.0144867
10119	4989.22	2	0	1	0	0	0	0.014479
10121	4989.26	2	0	1	0	0	0	0.014479
10123	4989.29	2	0	1	0	0	0	0.0144811
10125	4989.32	2	0	1	0	0	0	0.0145415
10127	4989.36	2	0	1	0	0	0	0.0145244
10129	4989.39	2	0	1	0	0	0	0.0145083
10131	4989.42	2	0	1	0	0	0	0.0145488
10133	4989.46	2	0	1	0	0	0	0.0145258
10135	4989.49	2	0	1	0	0	0	0.0145261
10137	4989.52	2	0	1	0	0	0	0.0145341
10139	4989.56	2	0	1	0	0	0	0.0145038
10141	4989.59	2	0	1	0	0	0	0.0145432
10143	4989.62	2	0	1	0	0	0	0.0145212
10145	4989.66	2	0	1	0	0	0	0.0145185
10147	4989.69	2	0	1	0	0	0	0.0144853
10149	4989.72	2	0	1	0	0	0	0.0144505
10151	4989.76	2	0	1	0	0	0	0.0144581
10153	4989.79	2	0	1	0	0	0	0.0144539
10155	4989.82	2	0	1	0	0	0	0.0144442
10157	4989.86	2	0	1	0	0	0	0.0144529
10159	4989.89	2	0	1	0	0	0	0.0144292
10161	4989.92	2	0	1	0	0	0	0.0144187
10163	4989.96	2	0	1	0	0	0	0.0144058
10165	4989.99	2	0	1	0	0	0	0.0144023
10167	4990.02	2	0	1	0	0	0	0.01444
10169	4990.06	2	0	1	0	0	0	0.014479
10171	4990.09	2	0	1	0	0	0	0.014478
10173	4990.12	2	0	1	0	0	0	0.0144937
10175	4990.16	2	0	1	0	0	0	0.0144794
10177	4990.19	2	0	1	0	0	0	0.0144982
10179	4990.22	2	0	1	0	0	0	0.0144752
10181	4990.26	2	0	1	0	0	0	0.0145021
10183	4990.29	2	0	1	0	0	0	0.0145341
10185	4990.32	2	0	1	0	0	0	0.0145512
10187	4990.36	2	0	1	0	0	0	0.0144947
10189	4990.39	2	0	1	0	0	0	0.0144731
10191	4990.42	2	0	1	0	0	0	0.0145122
10193	4990.46	2	0	1	0	0	0	0.0145111
10195	4990.49	2	0	1	0	0	0	0.0144766
10197	4990.52	2	0	1	0	0	0	0.0144961
10199	4990.56	2	0	1	0	0	0	0.014432
10201	4990.59	2	0	1	0	0	0	0.0145164
10203	4990.62	2	0	1	0	0	0	0.0144777
10205	4990.66	2	0	1	0	0	0	0.0144926
10207	4990.69	2	0	1	0	0	0	0.014477
10209	4990.72	2	0	1	0	0	0	0.014448
10211	4990.76	2	0	1	0	0	0	0.014515
10213	4990.79	2	0	1	0	0	0	0.0144376
10215	4990.82	2	0	1	0	0	0	0.014455
10217	4990.86	2	0	1	0	0	0	0.0144878
10219	4990.89	2	0	1	0	0	0	0.0144902
10221	4990.92	2	0	1	0	0	0	0.0144815
10223	4990.96	2	0	1	0	0	0	0.0144864
10225	4990.99	2	0	1	0	0	0	0.0145094
10227	4991.02	2	0	1	0	0	0	0.0144721
10229	4991.06	2	0	1	0	0	0	0.0145178
10231	4991.09	2	0	1	0	0	0	0.0145237
10233	4991.12	2	0	1	0	0	0	0.0145209
10235	4991.16	2	0	1	0	0	0	0.0144811
10237	4991.19	2	0	1	0	0	0	0.0145202
10239	4991.22	2	0	1	0	0	0	0.0144811
10241	4991.26	2	0	1	0	0	0	0.0144672
10243	4991.29	2	0	1	0	0	0	0.0144428
10245	4991.32	2	0	1	0	0	0	0.0144602
10247	4991.36	2	0	1	0	0	0	0.0144682
10249	4991.39	2	0	1	0	0	0	0.0144505
10251	4991.42	2	0	1	0	0	0	0.01444
10253	4991.46	2	0	1	0	0	0	0.0144606
10255	4991.49	2	0	1	0	0	0	0.0144536
10257	4991.52	2	0	1	0	0	0	0.0144644
10259	4991.56	2	0	1	0	0	0	0.0143964
10261	4991.59	2	0	1	0	0	0	0.0144442
10263	4991.62	2	0	1	0	0	0	0.0144456
10265	4991.66	2	0	1	0	0	0	0.014456
10267	4991.69	2	0	1	0	0	0	0.0144104
10269	4991.72	2	0	1	0	0	0	0.0144602
10271	4991.76	2	0	1	0	0	0	0.0144703
10273	4991.79	2	0	1	0	0	0	0.0144288
10275	4991.82	2	0	1	0	0	0	0.0143981
10277	4991.86	2	0	1	0	0	0	0.0144376
10279	4991.89	2	0	1	0	0	0	0.0144512
10281	4991.92	2	0	1	0	0	0	0.0144641
10283	4991.96	2	0	1	0	0	0	0.0144895
10285	4991.99	2	0	1	0	0	0	0.0145185
10287	4992.02	2	0	1	0	0	0	0.0145205
10289	4992.06	2	0	1	0	0	0	0.0145282
10291	4992.09	2	0	1	0	0	0	0.014553
10293	4992.12	2	0	1	0	0	0	0.0146147
10295	4992.16	2	0	1	0	0	0	0.0146381
10297	4992.19	2	0	1	0	0	0	0.0146116
10299	4992.22	2	0	1	0	0	0	0.0146307
10301	4992.26	2	0	1	0	0	0	0.0146084
10303	4992.29	2	0	1	0	0	0	0.014599
10305	4992.32	2	0	1	0	0	0	0.014621
10307	4992.36	2	0	1	0	0	0	0.0145544
10309	4992.39	2	0	1	0	0	0	0.0145673
10311	4992.42	2	0	1	0	0	0	0.014554
10313	4992.46	2	0	1	0	0	0	0.0145544
10315	4992.49	2	0	1	0	0	0	0.0145429
10317	4992.52	2	0	1	0	0	0	0.0145526
10319	4992.56	2	0	1	0	0	0	0.0145014
10321	4992.59	2	0	1	0	0	0	0.0144797
10323	4992.62	2	0	1	0	0	0	0.0145275
10325	4992.66	2	0	1	0	0	0	0.0144874
10327	4992.69	2	0	1	0	0	0	0.0144473
10329	4992.72	2	0	1	0	0	0	0.0145062
10331	4992.76	2	0	1	0	0	0	0.0144421
10333	4992.79	2	0	1	0	0	0	0.0144651
10335	4992.82	2	0	1	0	0	0	0.0144292
10337	4992.86	2	0	1	0	0	0	0.0144274
10339	4992.89	2	0	1	0	0	0	0.0143992
10341	4992.92	2	0	1	0	0	0	0.0143866
10343	4992.96	2	0	1	0	0	0	0.0144292
10345	4992.99	2	0	1	0	0	0	0.0143943
10347	4993.02	2	0	1	0	0	0	0.0144013
10349	4993.06	2	0	1	0	0	0	0.0143859
10351	4993.09	2	0	1	0	0	0	0.0144334
10353	4993.12	2	0	1	0	0	0	0.0145083
10355	4993.16	2	0	1	0	0	0	0.0145055
10357	4993.19	2	0	1	0	0	0	0.0145209
10359	4993.22	2	0	1	0	0	0	0.0145258
10361	4993.26	2	0	1	0	0	0	0.0145212
10363	4993.29	2	0	1	0	0	0	0.0145251
10365	4993.32	2	0	1	0	0	0	0.0145073
10367	4993.36	2	0	1	0	0	0	0.0145223
10369	4993.39	2	0	1	0	0	0	0.0144794
10371	4993.42	2	0	1	0	0	0	0.0144926
10373	4993.46	2	0	1	0	0	0	0.0144717
10375	4993.49	2	0	1	0	0	0	0.0144707
10377	4993.52	2	0	1	0	0	0	0.0144797
10379	4993.56	2	0	1	0	0	0	0.0145125
10381	4993.59	2	0	1	0	0	0	0.014516
10383	4993.62	2	0	1	0	0	0	0.0145024
10385	4993.66	2	0	1	0	0	0	0.0145
10387	4993.69	2	0	1	0	0	0	0.0144682
10389	4993.72	2	0	1	0	0	0	0.0144923
10391	4993.76	2	0	1	0	0	0	0.014463
10393	4993.79	2	0	1	0	0	0	0.0145146
10395	4993.82	2	0	1	0	0	0	0.0144895
10397	4993.86	2	0	1	0	0	0	0.014494
10399	4993.89	2	0	1	0	0	0	0.0144606
10401	4993.92	2	0	1	0	0	0	0.0144763
10403	4993.96	2	0	1	0	0	0	0.0144522
10405	4993.99	2	0	1	0	0	0	0.0144933
10407	4994.02	2	0	1	0	0	0	0.014432
10409	4994.06	2	0	1	0	0	0	0.0144327
10411	4994.09	2	0	1	0	0	0	0.0144578
10413	4994.12	2	0	1	0	0	0	0.0144327
10415	4994.16	2	0	1	0	0	0	0.0143975
10417	4994.19	2	0	1	0	0	0	0.0143975
10419	4994.22	2	0	1	0	0	0	0.0143643
10421	4994.26	2	0	1	0	0	0	0.0144009
10423	4994.29	2	0	1	0	0	0	0.0143807
10425	4994.32	2	0	1	0	0	0	0.0143525
10427	4994.36	2	0	1	0	0	0	0.0143274
10429	4994.39	2	0	1	0	0	0	0.0143427
10431	4994.42	2	0	1	0	0	0	0.0143472
10433	4994.46	2	0	1	0	0	0	0.0143661
10435	4994.49	2	0	1	0	0	0	0.014364
10437	4994.52	2	0	1	0	0	0	0.0143678
10439	4994.56	2	0	1	0	0	0	0.0143573
10441	4994.59	2	0	1	0	0	0	0.0143737
10443	4994.62	2	0	1	0	0	0	0.0143968
10445	4994.66	2	0	1	0	0	0	0.014402
10447	4994.69	2	0	1	0	0	0	0.0144131
10449	4994.72	2	0	1	0	0	0	0.0144079
10451	4994.76	2	0	1	0	0	0	0.0144079
10453	4994.79	2	0	1	0	0	0	0.0144243
10455	4994.82	2	0	1	0	0	0	0.0144292
10457	4994.86	2	0	1	0	0	0	0.0144372
10459	4994.89	2	0	1	0	0	0	0.0144424
10461	4994.92	2	0	1	0	0	0	0.0143884
10463	4994.96	2	0	1	0	0	0	0.0144173
10465	4994.99	2	0	1	0	0	0	0.0144177
10467	4995.02	2	0	1	0	0	0	0.0144358
10469	4995.06	2	0	1	0	0	0	0.0144062
10471	4995.09	2	0	1	0	0	0	0.0144731
10473	4995.12	2	0	1	0	0	0	0.0144278
10475	4995.16	2	0	1	0	0	0	0.0144107
10477	4995.19	2	0	1	0	0	0	0.0144553
10479	4995.22	2	0	1	0	0	0	0.0144459
10481	4995.26	2	0	1	0	0	0	0.0144306
10483	4995.29	2	0	1	0	0	0	0.0144159
10485	4995.32	2	0	1	0	0	0	0.0144236
10487	4995.36	2	0	1	0	0	0	0.0144365
10489	4995.39	2	0	1	0	0	0	0.0144536
10491	4995.42	2	0	1	0	0	0	0.0145226
10493	4995.46	2	0	1	0	0	0	0.0145516
10495	4995.49	2	0	1	0	0	0	0.0145568
10497	4995.52	2	0	1	0	0	0	0.0145729
10499	4995.56	2	0	1	0	0	0	0.014598
10501	4995.59	2	0	1	0	0	0	0.0146715
10503	4995.62	2	0	1	0	0	0	0.0146803
10505	4995.66	2	0	1	0	0	0	0.0147088
10507	4995.69	2	0	1	0	0	0	0.0146757
10509	4995.72	2	0	1	0	0	0	0.0146935
10511	4995.76	2	0	1	0	0	0	0.0146544
10513	4995.79	2	0	1	0	0	0	0.0146464
10515	4995.82	2	0	1	0	0	0	0.0146858
10517	4995.86	2	0	1	0	0	0	0.0147754
10519	4995.89	2	0	1	0	0	0	0.0147399
10521	4995.92	2	0	1	0	0	0	0.0147165
10523	4995.96	2	0	1	0	0	0	0.0148145
10525	4995.99	2	0	1	0	0	0	0.0147577
10527	4996.02	2	0	1	0	0	0	0.0147653
10529	4996.06	2	0	1	0	0	0	0.0147779
10531	4996.09	2	0	1	0	0	0	0.0147615
10533	4996.12	2	0	1	0	0	0	0.0147779
10535	4996.16	2	0	1	0	0	0	0.0147688
10537	4996.19	2	0	1	0	0	0	0.0146914
10539	4996.22	2	0	1	0	0	0	0.0147639
10541	4996.26	2	0	1	0	0	0	0.0147322
10543	4996.29	2	0	1	0	0	0	0.0147333
10545	4996.32	2	0	1	0	0	0	0.0147395
10547	4996.36	2	0	1	0	0	0	0.0147095
10549	4996.39	2	0	1	0	0	0	0.0147681
10551	4996.42	2	0	1	0	0	0	0.0147775
10553	4996.46	2	0	1	0	0	0	0.0147612
10555	4996.49	2	0	1	0	0	0	0.0148128
10557	4996.52	2	0	1	0	0	0	0.0147831
10559	4996.56	2	0	1	0	0	0	0.0147699
10561	4996.59	2	0	1	0	0	0	0.0147587
10563	4996.62	2	0	1	0	0	0	0.0147542
10565	4996.66	2	0	1	0	0	0	0.0147737
10567	4996.69	2	0	1	0	0	0	0.0147716
10569	4996.72	2	0	1	0	0	0	0.0147319
10571	4996.76	2	0	1	0	0	0	0.0146952
10573	4996.79	2	0	1	0	0	0	0.0147064
10575	4996.82	2	0	1	0	0	0	0.0146952
10577	4996.86	2	0	1	0	0	0	0.0146722
10579	4996.89	2	0	1	0	0	0	0.0146405
10581	4996.92	2	0	1	0	0	0	0.0146028
10583	4996.96	2	0	1	0	0	0	0.0146255
10585	4996.99	2	0	1	0	0	0	0.0146206
10587	4997.02	2	0	1	0	0	0	0.0146332
10589	4997.06	2	0	1	0	0	0	0.0146457
10591	4997.09	2	0	1	0	0	0	0.0146335
10593	4997.12	2	0	1	0	0	0	0.0146524
10595	4997.16	2	0	1	0	0	0	0.014668
10597	4997.19	2	0	1	0	0	0	0.0146569
10599	4997.22	2	0	1	0	0	0	0.0146196
10601	4997.26	2	0	1	0	0	0	0.0146318
10603	4997.29	2	0	1	0	0	0	0.0145798
10605	4997.32	2	0	1	0	0	0	0.014576
10607	4997.36	2	0	1	0	0	0	0.0145676
10609	4997.39	2	0	1	0	0	0	0.0145823
10611	4997.42	2	0	1	0	0	0	0.0145931
10613	4997.46	2	0	1	0	0	0	0.0145742
10615	4997.49	2	0	1	0	0	0	0.0145293
10617	4997.52	2	0	1	0	0	0	0.0145164
10619	4997.56	2	0	1	0	0	0	0.0145097
10621	4997.59	2	0	1	0	0	0	0.0145076
10623	4997.62	2	0	1	0	0	0	0.0144811
10625	4997.66	2	0	1	0	0	0	0.0144961
10627	4997.69	2	0	1	0	0	0	0.0144431
10629	4997.72	2	0	1	0	0	0	0.0144815
10631	4997.76	2	0	1	0	0	0	0.0144661
10633	4997.79	2	0	1	0	0	0	0.0144449
10635	4997.82	2	0	1	0	0	0	0.0144187
10637	4997.86	2	0	1	0	0	0	0.0144749
10639	4997.89	2	0	1	0	0	0	0.0144013
10641	4997.92	2	0	1	0	0	0	0.0143751
10643	4997.96	2	0	1	0	0	0	0.0144358
10645	4997.99	2	0	1	0	0	0	0.0144013
10647	4998.02	2	0	1	0	0	0	0.0143744
10649	4998.06	2	0	1	0	0	0	0.0144278
10651	4998.09	2	0	1	0	0	0	0.0144759
10653	4998.12	2	0	1	0	0	0	0.0144027
10655	4998.16	2	0	1	0	0	0	0.0144602
10657	4998.19	2	0	1	0	0	0	0.0144316
10659	4998.22	2	0	1	0	0	0	0.014493
10661	4998.26	2	0	1	0	0	0	0.0144731
10663	4998.29	2	0	1	0	0	0	0.0144487
10665	4998.32	2	0	1	0	0	0	0.0144034
10667	4998.36	2	0	1	0	0	0	0.0144163
10669	4998.39	2	0	1	0	0	0	0.0144334
10671	4998.42	2	0	1	0	0	0	0.014425
10673	4998.46	2	0	1	0	0	0	0.0144104
10675	4998.49	2	0	1	0	0	0	0.0144062
10677	4998.52	2	0	1	0	0	0	0.0144219
10679	4998.56	2	0	1	0	0	0	0.0143521
10681	4998.59	2	0	1	0	0	0	0.0143908
10683	4998.62	2	0	1	0	0	0	0.0143971
10685	4998.66	2	0	1	0	0	0	0.0143975
10687	4998.69	2	0	1	0	0	0	0.014387
10689	4998.72	2	0	1	0	0	0	0.0144069
10691	4998.76	2	0	1	0	0	0	0.0143926
10693	4998.79	2	0	1	0	0	0	0.0143863
10695	4998.82	2	0	1	0	0	0	0.0144013
10697	4998.86	2	0	1	0	0	0	0.0143915
10699	4998.89	2	0	1	0	0	0	0.0143936
10701	4998.92	2	0	1	0	0	0	0.0143647
10703	4998.96	2	0	1	0	0	0	0.0143981
10705	4998.99	2	0	1	0	0	0	0.0143807
10707	4999.02	2	0	1	0	0	0	0.0143947
10709	4999.06	2	0	1	0	0	0	0.0143898
10711	4999.09	2	0	1	0	0	0	0.014394
10713	4999.12	2	0	1	0	0	0	0.0143988
10715	4999.16	2	0	1	0	0	0	0.0143943
10717	4999.19	2	0	1	0	0	0	0.0143936
10719	4999.22	2	0	1	0	0	0	0.0143605
10721	4999.26	2	0	1	0	0	0	0.0143629
10723	4999.29	2	0	1	0	0	0	0.0143859
10725	4999.32	2	0	1	0	0	0	0.0143755
10727	4999.36	2	0	1	0	0	0	0.0143685
10729	4999.39	2	0	1	0	0	0	0.0144215
10731	4999.42	2	0	1	0	0	0	0.0144323
10733	4999.46	2	0	1	0	0	0	0.0144532
10735	4999.49	2	0	1	0	0	0	0.0143985
10737	4999.52	2	0	1	0	0	0	0.0144117
10739	4999.56	2	0	1	0	0	0	0.0144212
10741	4999.59	2	0	1	0	0	0	0.0144226
10743	4999.62	2	0	1	0	0	0	0.0144623
10745	4999.66	2	0	1	0	0	0	0.0144435
10747	4999.69	2	0	1	0	0	0	0.0143964
10749	4999.72	2	0	1	0	0	0	0.0144745
10751	4999.76	2	0	1	0	0	0	0.0144749
10753	4999.79	2	0	1	0	0	0	0.0144076
10755	4999.82	2	0	1	0	0	0	0.0144756
10757	4999.86	2	0	1	0	0	0	0.0144728
10759	4999.89	2	0	1	0	0	0	0.0144986
10761	4999.92	2	0	1	0	0	0	0.0145202
10763	4999.96	2	0	1	0	0	0	0.0144815
10765	4999.99	2	0	1	0	0	0	0.0145146
10767	5000.02	2	0	1	0	0	0	0.0145017
10769	5000.06	2	0	1	0	0	0	0.0145021
10771	5000.09	2	0	1	0	0	0	0.0145261
10773	5000.12	2	0	1	0	0	0	0.0145359
10775	5000.16	2	0	1	0	0	0	0.0145851
10777	5000.19	2	0	1	0	0	0	0.0145812
10779	5000.22	2	0	1	0	0	0	0.014583
10781	5000.26	2	0	1	0	0	0	0.0145826
10783	5000.29	2	0	1	0	0	0	0.0145704
10785	5000.32	2	0	1	0	0	0	0.0145303
10787	5000.36	2	0	1	0	0	0	0.0145816
10789	5000.39	2	0	1	0	0	0	0.0145641
10791	5000.42	2	0	1	0	0	0	0.0145383
10793	5000.46	2	0	1	0	0	0	0.0145439
10795	5000.49	2	0	1	0	0	0	0.014577
10797	5000.52	2	0	1	0	0	0	0.0145882
10799	5000.56	2	0	1	0	0	0	0.0146
10801	5000.59	2	0	1	0	0	0	0.0146088
10803	5000.62	2	0	1	0	0	0	0.0145983
10805	5000.66	2	0	1	0	0	0	0.0145983
10807	5000.69	2	0	1	0	0	0	0.0146408
10809	5000.72	2	0	1	0	0	0	0.0146213
10811	5000.76	2	0	1	0	0	0	0.014622
10813	5000.79	2	0	1	0	0	0	0.0146719
10815	5000.82	2	0	1	0	0	0	0.0145854
10817	5000.86	2	0	1	0	0	0	0.0145952
10819	5000.89	2	0	1	0	0	0	0.0146157
10821	5000.92	2	0	1	0	0	0	0.0145948
10823	5000.96	2	0	1	0	0	0	0.0146374
10825	5000.99	2	0	1	0	0	0	0.014645
10827	5001.02	2	0	1	0	0	0	0.0146576
10829	5001.06	2	0	1	0	0	0	0.0146499
10831	5001.09	2	0	1	0	0	0	0.0146907
10833	5001.12	2	0	1	0	0	0	0.0146503
10835	5001.16	2	0	1	0	0	0	0.0146513
10837	5001.19	2	0	1	0	0	0	0.0146391
10839	5001.22	2	0	1	0	0	0	0.0146454
10841	5001.26	2	0	1	0	0	0	0.0146475
10843	5001.29	2	0	1	0	0	0	0.0146053
10845	5001.32	2	0	1	0	0	0	0.0146579
10847	5001.36	2	0	1	0	0	0	0.0146524
10849	5001.39	2	0	1	0	0	0	0.0146614
10851	5001.42	2	0	1	0	0	0	0.0146911
10853	5001.46	2	0	1	0	0	0	0.014683
10855	5001.49	2	0	1	0	0	0	0.0146932
10857	5001.52	2	0	1	0	0	0	0.0147075
10859	5001.56	2	0	1	0	0	0	0.0146733
10861	5001.59	2	0	1	0	0	0	0.0146719
10863	5001.62	2	0	1	0	0	0	0.0146747
10865	5001.66	2	0	1	0	0	0	0.0146489
10867	5001.69	2	0	1	0	0	0	0.014666
10869	5001.72	2	0	1	0	0	0	0.0145924
10871	5001.76	2	0	1	0	0	0	0.0146248
10873	5001.79	2	0	1	0	0	0	0.0146597
10875	5001.82	2	0	1	0	0	0	0.0146558
10877	5001.86	2	0	1	0	0	0	0.0146077
10879	5001.89	2	0	1	0	0	0	0.0145892
10881	5001.92	2	0	1	0	0	0	0.0145837
10883	5001.96	2	0	1	0	0	0	0.014613
10885	5001.99	2	0	1	0	0	0	0.0146715
10887	5002.02	2	0	1	0	0	0	0.0146157
10889	5002.06	2	0	1	0	0	0	0.0146447
10891	5002.09	2	0	1	0	0	0	0.0146206
10893	5002.12	2	0	1	0	0	0	0.0147451
10895	5002.16	2	0	1	0	0	0	0.0147214
10897	5002.19	2	0	1	0	0	0	0.0147085
10899	5002.22	2	0	1	0	0	0	0.0147033
10901	5002.26	2	0	1	0	0	0	0.0147172
10903	5002.29	2	0	1	0	0	0	0.0147385
10905	5002.32	2	0	1	0	0	0	0.0147277
10907	5002.36	2	0	1	0	0	0	0.0147217
10909	5002.39	2	0	1	0	0	0	0.0147256
10911	5002.42	2	0	1	0	0	0	0.0147517
10913	5002.46	2	0	1	0	0	0	0.014772
10915	5002.49	2	0	1	0	0	0	0.0147165
10917	5002.52	2	0	1	0	0	0	0.0147064
10919	5002.56	2	0	1	0	0	0	0.0147148
10921	5002.59	2	0	1	0	0	0	0.014682
10923	5002.62	2	0	1	0	0	0	0.0147653
10925	5002.66	2	0	1	0	0	0	0.0147071
10927	5002.69	2	0	1	0	0	0	0.0147476
10929	5002.72	2	0	1	0	0	0	0.014743
10931	5002.76	2	0	1	0	0	0	0.014757
10933	5002.79	2	0	1	0	0	0	0.0147496
10935	5002.82	2	0	1	0	0	0	0.014734
10937	5002.86	2	0	1	0	0	0	0.0147137
10939	5002.89	2	0	1	0	0	0	0.0147531
10941	5002.92	2	0	1	0	0	0	0.0147943
10943	5002.96	2	0	1	0	0	0	0.0147821
10945	5002.99	2	0	1	0	0	0	0.0147974
10947	5003.02	2	0	1	0	0	0	0.0147887
10949	5003.06	2	0	1	0	0	0	0.0147817
10951	5003.09	2	0	1	0	0	0	0.0147702
10953	5003.12	2	0	1	0	0	0	0.0147807
10955	5003.16	2	0	1	0	0	0	0.0147918
10957	5003.19	2	0	1	0	0	0	0.0147988
10959	5003.22	2	0	1	0	0	0	0.0147758
10961	5003.26	2	0	1	0	0	0	0.0148372
10963	5003.29	2	0	1	0	0	0	0.0148016
10965	5003.32	2	0	1	0	0	0	0.0148267
10967	5003.36	2	0	1	0	0	0	0.0148734
10969	5003.39	2	0	1	0	0	0	0.0148773
10971	5003.42	2	0	1	0	0	0	0.0149188
10973	5003.46	2	0	1	0	0	0	0.0149352
10975	5003.49	2	0	1	0	0	0	0.0149585
10977	5003.52	2	0	1	0	0	0	0.014976
10979	5003.56	2	0	1	0	0	0	0.0149965
10981	5003.59	2	0	1	0	0	0	0.0149847
10983	5003.62	2	0	1	0	0	0	0.014977
10985	5003.66	2	0	1	0	0	0	0.0149683
10987	5003.69	2	0	1	0	0	0	0.0149421
10989	5003.72	2	0	1	0	0	0	0.0149969
10991	5003.76	2	0	1	0	0	0	0.0149522
10993	5003.79	2	0	1	0	0	0	0.0149763
10995	5003.82	2	0	1	0	0	0	0.01506
10997	5003.86	2	0	1	0	0	0	0.0150384
10999	5003.89	2	0	1	0	0	0	0.0150164
11001	5003.92	2	0	1	0	0	0	0.0149763
11003	5003.96	2	0	1	0	0	0	0.0149449
11005	5003.99	2	0	1	0	0	0	0.0150216
11007	5004.02	2	0	1	0	0	0	0.0150335
11009	5004.06	2	0	1	0	0	0	0.0149547
11011	5004.09	2	0	1	0	0	0	0.0149655
11013	5004.12	2	0	1	0	0	0	0.0150234
11015	5004.16	2	0	1	0	0	0	0.0149243
11017	5004.19	2	0	1	0	0	0	0.0149955
11019	5004.22	2	0	1	0	0	0	0.0150213
11021	5004.26	2	0	1	0	0	0	0.015044
11023	5004.29	2	0	1	0	0	0	0.0150314
11025	5004.32	2	0	1	0	0	0	0.0151053
11027	5004.36	2	0	1	0	0	0	0.015136
11029	5004.39	2	0	1	0	0	0	0.0151806
11031	5004.42	2	0	1	0	0	0	0.0152141
11033	5004.46	2	0	1	0	0	0	0.0151709
11035	5004.49	2	0	1	0	0	0	0.0152232
11037	5004.52	2	0	1	0	0	0	0.015204
11039	5004.56	2	0	1	0	0	0	0.0151995
11041	5004.59	2	0	1	0	0	0	0.0152051
11043	5004.62	2	0	1	0	0	0	0.015203
11045	5004.66	2	0	1	0	0	0	0.0151908
11047	5004.69	2	0	1	0	0	0	0.0152277
11049	5004.72	2	0	1	0	0	0	0.0152378
11051	5004.76	2	0	1	0	0	0	0.0151416
11053	5004.79	2	0	1	0	0	0	0.0151426
11055	5004.82	2	0	1	0	0	0	0.0151479
11057	5004.86	2	0	1	0	0	0	0.0151594
11059	5004.89	2	0	1	0	0	0	0.0151963
11061	5004.92	2	0	1	0	0	0	0.0152581
11063	5004.96	2	0	1	0	0	0	0.0152685
11065	5004.99	2	0	1	0	0	0	0.0152598
11067	5005.02	2	0	1	0	0	0	0.0152783
11069	5005.06	2	0	1	0	0	0	0.01531
11071	5005.09	2	0	1	0	0	0	0.0152915
11073	5005.12	2	0	1	0	0	0	0.0153139
11075	5005.16	2	0	1	0	0	0	0.0153365
11077	5005.19	2	0	1	0	0	0	0.0153247
11079	5005.22	2	0	1	0	0	0	0.0153358
11081	5005.26	2	0	1	0	0	0	0.0152657
11083	5005.29	2	0	1	0	0	0	0.0153142
11085	5005.32	2	0	1	0	0	0	0.0152828
11087	5005.36	2	0	1	0	0	0	0.0152884
11089	5005.39	2	0	1	0	0	0	0.0152894
11091	5005.42	2	0	1	0	0	0	0.0152333
11093	5005.46	2	0	1	0	0	0	0.0152713
11095	5005.49	2	0	1	0	0	0	0.0152692
11097	5005.52	2	0	1	0	0	0	0.0152724
11099	5005.56	2	0	1	0	0	0	0.0153163
11101	5005.59	2	0	1	0	0	0	0.0153037
11103	5005.62	2	0	1	0	0	0	0.0153048
11105	5005.66	2	0	1	0	0	0	0.0152856
11107	5005.69	2	0	1	0	0	0	0.0153194
[truncated: 34,158 more rows]

## Sheet: Mouse_3_415_Signal
FrameCounter	Timestamp	LedState	Stimulation	Output0	Output1	Input0	Input1	Region0G
7124	270.287	1	0	1	0	0	0	0.0157391
7126	270.32	1	0	1	0	0	0	0.0157776
7128	270.354	1	0	1	0	0	0	0.0157191
7130	270.387	1	0	1	0	0	0	0.0157005
7132	270.42	1	0	1	0	0	0	0.0157753
7134	270.454	1	0	1	0	0	0	0.0157215
7136	270.487	1	0	1	0	0	0	0.0157147
7138	270.52	1	0	1	0	0	0	0.015732
7140	270.554	1	0	1	0	0	0	0.0157181
7142	270.587	1	0	1	0	0	0	0.0156842
7144	270.62	1	0	1	0	0	0	0.0157286
7146	270.654	1	0	1	0	0	0	0.0157333
7148	270.687	1	0	1	0	0	0	0.015687
7150	270.72	1	0	1	0	0	0	0.0157235
7152	270.754	1	0	1	0	0	0	0.0156798
7154	270.787	1	0	1	0	0	0	0.0156616
7156	270.82	1	0	1	0	0	0	0.0156534
7158	270.854	1	0	1	0	0	0	0.0156562
7160	270.887	1	0	1	0	0	0	0.0156504
7162	270.92	1	0	1	0	0	0	0.0156298
7164	270.954	1	0	1	0	0	0	0.0155976
7166	270.987	1	0	1	0	0	0	0.0155979
7168	271.02	1	0	1	0	0	0	0.015602
7170	271.054	1	0	1	0	0	0	0.0156067
7172	271.087	1	0	1	0	0	0	0.0155408
7174	271.12	1	0	1	0	0	0	0.0156071
7176	271.154	1	0	1	0	0	0	0.0156071
7178	271.187	1	0	1	0	0	0	0.0156294
7180	271.22	1	0	1	0	0	0	0.0156193
7182	271.254	1	0	1	0	0	0	0.0156534
7184	271.287	1	0	1	0	0	0	0.0156463
7186	271.32	1	0	1	0	0	0	0.0155888
7188	271.354	1	0	1	0	0	0	0.0156578
7190	271.387	1	0	1	0	0	0	0.0156694
7192	271.42	1	0	1	0	0	0	0.0157133
7194	271.454	1	0	1	0	0	0	0.0157127
7196	271.487	1	0	1	0	0	0	0.0156944
7198	271.52	1	0	1	0	0	0	0.015755
7200	271.554	1	0	1	0	0	0	0.0157123
7202	271.587	1	0	1	0	0	0	0.0157238
7204	271.62	1	0	1	0	0	0	0.0156626
7206	271.654	1	0	1	0	0	0	0.0157066
7208	271.687	1	0	1	0	0	0	0.0157624
7210	271.72	1	0	1	0	0	0	0.0156643
7212	271.754	1	0	1	0	0	0	0.0156646
7214	271.787	1	0	1	0	0	0	0.0158213
7216	271.82	1	0	1	0	0	0	0.0157584
7218	271.854	1	0	1	0	0	0	0.0157709
7220	271.887	1	0	1	0	0	0	0.0158951
7222	271.92	1	0	1	0	0	0	0.0157793
7224	271.954	1	0	1	0	0	0	0.0158626
7226	271.987	1	0	1	0	0	0	0.0159181
7228	272.02	1	0	1	0	0	0	0.0159167
7230	272.054	1	0	1	0	0	0	0.0157056
7232	272.087	1	0	1	0	0	0	0.0156656
7234	272.12	1	0	1	0	0	0	0.0157309
7236	272.154	1	0	1	0	0	0	0.0157756
7238	272.187	1	0	1	0	0	0	0.0157577
7240	272.22	1	0	1	0	0	0	0.0156748
7242	272.254	1	0	1	0	0	0	0.0157367
7244	272.287	1	0	1	0	0	0	0.015669
7246	272.32	1	0	1	0	0	0	0.0156846
7248	272.354	1	0	1	0	0	0	0.0156815
7250	272.387	1	0	1	0	0	0	0.0157902
7252	272.42	1	0	1	0	0	0	0.0157238
7254	272.454	1	0	1	0	0	0	0.0156067
7256	272.487	1	0	1	0	0	0	0.0155956
7258	272.52	1	0	1	0	0	0	0.015648
7260	272.554	1	0	1	0	0	0	0.015648
7262	272.587	1	0	1	0	0	0	0.0156362
7264	272.62	1	0	1	0	0	0	0.015671
7266	272.654	1	0	1	0	0	0	0.0156721
7268	272.687	1	0	1	0	0	0	0.0156128
7270	272.72	1	0	1	0	0	0	0.0156054
7272	272.754	1	0	1	0	0	0	0.0156562
7274	272.787	1	0	1	0	0	0	0.0156873
7276	272.82	1	0	1	0	0	0	0.0156792
7278	272.854	1	0	1	0	0	0	0.0156941
7280	272.887	1	0	1	0	0	0	0.0157245
7282	272.92	1	0	1	0	0	0	0.0156758
7284	272.954	1	0	1	0	0	0	0.0156694
7286	272.987	1	0	1	0	0	0	0.0157709
7288	273.02	1	0	1	0	0	0	0.0157621
7290	273.054	1	0	1	0	0	0	0.0157519
7292	273.087	1	0	1	0	0	0	0.0157381
7294	273.12	1	0	1	0	0	0	0.0157837
7296	273.154	1	0	1	0	0	0	0.0157469
7298	273.187	1	0	1	0	0	0	0.0155868
7300	273.22	1	0	1	0	0	0	0.0156548
7302	273.254	1	0	1	0	0	0	0.0157607
7304	273.287	1	0	1	0	0	0	0.0157469
7306	273.32	1	0	1	0	0	0	0.0158819
7308	273.354	1	0	1	0	0	0	0.0158619
7310	273.387	1	0	1	0	0	0	0.0159296
7312	273.42	1	0	1	0	0	0	0.0160768
7314	273.454	1	0	1	0	0	0	0.0159113
7316	273.487	1	0	1	0	0	0	0.0157854
7318	273.52	1	0	1	0	0	0	0.0156595
7320	273.554	1	0	1	0	0	0	0.01558
7322	273.587	1	0	1	0	0	0	0.0156017
7324	273.62	1	0	1	0	0	0	0.015646
7326	273.654	1	0	1	0	0	0	0.0156342
7328	273.687	1	0	1	0	0	0	0.0157059
7330	273.72	1	0	1	0	0	0	0.0157458
7332	273.754	1	0	1	0	0	0	0.0156443
7334	273.787	1	0	1	0	0	0	0.0156237
7336	273.82	1	0	1	0	0	0	0.0156606
7338	273.854	1	0	1	0	0	0	0.0156653
7340	273.887	1	0	1	0	0	0	0.0157127
7342	273.92	1	0	1	0	0	0	0.0156609
7344	273.954	1	0	1	0	0	0	0.0156646
7346	273.987	1	0	1	0	0	0	0.0157469
7348	274.02	1	0	1	0	0	0	0.015711
7350	274.054	1	0	1	0	0	0	0.0156622
7352	274.087	1	0	1	0	0	0	0.015779
7354	274.12	1	0	1	0	0	0	0.0157425
7356	274.154	1	0	1	0	0	0	0.0156023
7358	274.187	1	0	1	0	0	0	0.0156463
7360	274.22	1	0	1	0	0	0	0.015647
7362	274.254	1	0	1	0	0	0	0.0156142
7364	274.287	1	0	1	0	0	0	0.0156189
7366	274.32	1	0	1	0	0	0	0.0156105
7368	274.354	1	0	1	0	0	0	0.0155766
7370	274.387	1	0	1	0	0	0	0.0156433
7372	274.42	1	0	1	0	0	0	0.0156924
7374	274.454	1	0	1	0	0	0	0.015599
7376	274.487	1	0	1	0	0	0	0.0156819
7378	274.52	1	0	1	0	0	0	0.0156169
7380	274.554	1	0	1	0	0	0	0.0156551
7382	274.587	1	0	1	0	0	0	0.0157364
7384	274.62	1	0	1	0	0	0	0.0156809
7386	274.654	1	0	1	0	0	0	0.0156578
7388	274.687	1	0	1	0	0	0	0.0156416
7390	274.72	1	0	1	0	0	0	0.0156724
7392	274.754	1	0	1	0	0	0	0.0156802
7394	274.787	1	0	1	0	0	0	0.0157083
7396	274.82	1	0	1	0	0	0	0.015666
7398	274.854	1	0	1	0	0	0	0.015668
7400	274.887	1	0	1	0	0	0	0.0157489
7402	274.92	1	0	1	0	0	0	0.0157983
7404	274.954	1	0	1	0	0	0	0.0156609
7406	274.987	1	0	1	0	0	0	0.0155905
7408	275.02	1	0	1	0	0	0	0.0157482
7410	275.054	1	0	1	0	0	0	0.0158321
7412	275.087	1	0	1	0	0	0	0.0159296
7414	275.12	1	0	1	0	0	0	0.0158849
7416	275.154	1	0	1	0	0	0	0.0160518
7418	275.187	1	0	1	0	0	0	0.0160504
7420	275.22	1	0	1	0	0	0	0.0160227
7422	275.254	1	0	1	0	0	0	0.0159435
7424	275.287	1	0	1	0	0	0	0.015957
7426	275.32	1	0	1	0	0	0	0.0159421
7428	275.354	1	0	1	0	0	0	0.0159841
7430	275.387	1	0	1	0	0	0	0.0159614
7432	275.42	1	0	1	0	0	0	0.0158991
7434	275.454	1	0	1	0	0	0	0.0158463
7436	275.487	1	0	1	0	0	0	0.0157719
7438	275.52	1	0	1	0	0	0	0.0158
7440	275.554	1	0	1	0	0	0	0.0156436
7442	275.587	1	0	1	0	0	0	0.0156964
7444	275.62	1	0	1	0	0	0	0.0156352
7446	275.654	1	0	1	0	0	0	0.0156643
7448	275.687	1	0	1	0	0	0	0.0156616
7450	275.72	1	0	1	0	0	0	0.0156741
7452	275.754	1	0	1	0	0	0	0.0156653
7454	275.787	1	0	1	0	0	0	0.0156606
7456	275.82	1	0	1	0	0	0	0.0156291
7458	275.854	1	0	1	0	0	0	0.0155881
7460	275.887	1	0	1	0	0	0	0.0156166
7462	275.92	1	0	1	0	0	0	0.0156013
7464	275.954	1	0	1	0	0	0	0.0155891
7466	275.987	1	0	1	0	0	0	0.0155668
7468	276.02	1	0	1	0	0	0	0.0155702
7470	276.054	1	0	1	0	0	0	0.0155489
7472	276.087	1	0	1	0	0	0	0.0156809
7474	276.12	1	0	1	0	0	0	0.0156477
7476	276.154	1	0	1	0	0	0	0.0156436
7478	276.187	1	0	1	0	0	0	0.0157154
7480	276.22	1	0	1	0	0	0	0.0156331
7482	276.254	1	0	1	0	0	0	0.0156822
7484	276.287	1	0	1	0	0	0	0.0156558
7486	276.32	1	0	1	0	0	0	0.0156463
7488	276.354	1	0	1	0	0	0	0.0157015
7490	276.387	1	0	1	0	0	0	0.0156487
7492	276.42	1	0	1	0	0	0	0.0157022
7494	276.454	1	0	1	0	0	0	0.0157025
7496	276.487	1	0	1	0	0	0	0.0156494
7498	276.52	1	0	1	0	0	0	0.015667
7500	276.554	1	0	1	0	0	0	0.0157688
7502	276.587	1	0	1	0	0	0	0.0157083
7504	276.62	1	0	1	0	0	0	0.0157303
7506	276.654	1	0	1	0	0	0	0.0157722
7508	276.687	1	0	1	0	0	0	0.015737
7510	276.72	1	0	1	0	0	0	0.0157597
7512	276.754	1	0	1	0	0	0	0.0157983
7514	276.787	1	0	1	0	0	0	0.0157936
7516	276.82	1	0	1	0	0	0	0.0157364
7518	276.854	1	0	1	0	0	0	0.0157499
7520	276.887	1	0	1	0	0	0	0.0157529
7522	276.92	1	0	1	0	0	0	0.0157502
7524	276.954	1	0	1	0	0	0	0.0158095
7526	276.987	1	0	1	0	0	0	0.0157309
7528	277.02	1	0	1	0	0	0	0.0157397
7530	277.054	1	0	1	0	0	0	0.0159577
7532	277.087	1	0	1	0	0	0	0.0159929
7534	277.12	1	0	1	0	0	0	0.0159621
7536	277.154	1	0	1	0	0	0	0.015978
7538	277.187	1	0	1	0	0	0	0.0159194
7540	277.22	1	0	1	0	0	0	0.0159736
7542	277.254	1	0	1	0	0	0	0.0159993
7544	277.287	1	0	1	0	0	0	0.0160125
7546	277.32	1	0	1	0	0	0	0.0160315
7548	277.354	1	0	1	0	0	0	0.0161171
7550	277.387	1	0	1	0	0	0	0.0160274
7552	277.42	1	0	1	0	0	0	0.0160433
7554	277.454	1	0	1	0	0	0	0.016001
7556	277.487	1	0	1	0	0	0	0.0159543
7558	277.52	1	0	1	0	0	0	0.0159201
7560	277.554	1	0	1	0	0	0	0.0158392
7562	277.587	1	0	1	0	0	0	0.0158568
7564	277.62	1	0	1	0	0	0	0.0157776
7566	277.654	1	0	1	0	0	0	0.0158477
7568	277.687	1	0	1	0	0	0	0.0158761
7570	277.72	1	0	1	0	0	0	0.0157113
7572	277.754	1	0	1	0	0	0	0.0157705
7574	277.787	1	0	1	0	0	0	0.0158386
7576	277.82	1	0	1	0	0	0	0.0158778
7578	277.854	1	0	1	0	0	0	0.0157421
7580	277.887	1	0	1	0	0	0	0.0157025
7582	277.92	1	0	1	0	0	0	0.0156122
7584	277.954	1	0	1	0	0	0	0.0156802
7586	277.987	1	0	1	0	0	0	0.015556
7588	278.02	1	0	1	0	0	0	0.0154348
7590	278.054	1	0	1	0	0	0	0.0153949
7592	278.087	1	0	1	0	0	0	0.0154815
7594	278.12	1	0	1	0	0	0	0.0155265
7596	278.154	1	0	1	0	0	0	0.0154372
7598	278.187	1	0	1	0	0	0	0.0153543
7600	278.22	1	0	1	0	0	0	0.0155299
7602	278.254	1	0	1	0	0	0	0.0155864
7604	278.287	1	0	1	0	0	0	0.0155496
7606	278.32	1	0	1	0	0	0	0.0155245
7608	278.354	1	0	1	0	0	0	0.0154968
7610	278.387	1	0	1	0	0	0	0.0153627
7612	278.42	1	0	1	0	0	0	0.0154179
7614	278.454	1	0	1	0	0	0	0.0154825
7616	278.487	1	0	1	0	0	0	0.0154768
7618	278.52	1	0	1	0	0	0	0.0156155
7620	278.553	1	0	1	0	0	0	0.015493
7622	278.587	1	0	1	0	0	0	0.0154941
7624	278.62	1	0	1	0	0	0	0.0155282
7626	278.653	1	0	1	0	0	0	0.0155746
7628	278.687	1	0	1	0	0	0	0.0155891
7630	278.72	1	0	1	0	0	0	0.0155797
7632	278.753	1	0	1	0	0	0	0.0155702
7634	278.787	1	0	1	0	0	0	0.0155651
7636	278.82	1	0	1	0	0	0	0.0155025
7638	278.853	1	0	1	0	0	0	0.0154707
7640	278.887	1	0	1	0	0	0	0.0155468
7642	278.92	1	0	1	0	0	0	0.0155184
7644	278.953	1	0	1	0	0	0	0.0155303
7646	278.987	1	0	1	0	0	0	0.0155049
7648	279.02	1	0	1	0	0	0	0.0155695
7650	279.053	1	0	1	0	0	0	0.0155401
7652	279.087	1	0	1	0	0	0	0.015537
7654	279.12	1	0	1	0	0	0	0.0155942
7656	279.153	1	0	1	0	0	0	0.0156524
7658	279.187	1	0	1	0	0	0	0.0155617
7660	279.22	1	0	1	0	0	0	0.0155411
7662	279.253	1	0	1	0	0	0	0.0155533
7664	279.287	1	0	1	0	0	0	0.0155533
7666	279.32	1	0	1	0	0	0	0.0153939
7668	279.353	1	0	1	0	0	0	0.0154047
7670	279.387	1	0	1	0	0	0	0.0154562
7672	279.42	1	0	1	0	0	0	0.0155939
7674	279.453	1	0	1	0	0	0	0.0156176
7676	279.487	1	0	1	0	0	0	0.0157137
7678	279.52	1	0	1	0	0	0	0.0157587
7680	279.553	1	0	1	0	0	0	0.0156853
7682	279.587	1	0	1	0	0	0	0.0157381
7684	279.62	1	0	1	0	0	0	0.015737
7686	279.653	1	0	1	0	0	0	0.0155012
7688	279.687	1	0	1	0	0	0	0.0154687
7690	279.72	1	0	1	0	0	0	0.0155035
7692	279.753	1	0	1	0	0	0	0.0154578
7694	279.787	1	0	1	0	0	0	0.0153854
7696	279.82	1	0	1	0	0	0	0.0154328
7698	279.853	1	0	1	0	0	0	0.0154149
7700	279.887	1	0	1	0	0	0	0.0154206
7702	279.92	1	0	1	0	0	0	0.0154991
7704	279.953	1	0	1	0	0	0	0.0155005
7706	279.987	1	0	1	0	0	0	0.0154474
7708	280.02	1	0	1	0	0	0	0.0155289
7710	280.053	1	0	1	0	0	0	0.0155167
7712	280.087	1	0	1	0	0	0	0.0154193
7714	280.12	1	0	1	0	0	0	0.0154321
7716	280.153	1	0	1	0	0	0	0.0154105
7718	280.187	1	0	1	0	0	0	0.0153763
7720	280.22	1	0	1	0	0	0	0.0153485
7722	280.253	1	0	1	0	0	0	0.0154426
7724	280.287	1	0	1	0	0	0	0.0155367
7726	280.32	1	0	1	0	0	0	0.0154876
7728	280.353	1	0	1	0	0	0	0.0155482
7730	280.387	1	0	1	0	0	0	0.0155005
7732	280.42	1	0	1	0	0	0	0.0154927
7734	280.453	1	0	1	0	0	0	0.0155029
7736	280.487	1	0	1	0	0	0	0.0155306
7738	280.52	1	0	1	0	0	0	0.0154751
7740	280.553	1	0	1	0	0	0	0.015669
7742	280.587	1	0	1	0	0	0	0.0159178
7744	280.62	1	0	1	0	0	0	0.0159266
7746	280.653	1	0	1	0	0	0	0.015803
7748	280.687	1	0	1	0	0	0	0.0156108
7750	280.72	1	0	1	0	0	0	0.0157242
7752	280.753	1	0	1	0	0	0	0.0154954
7754	280.787	1	0	1	0	0	0	0.0153695
7756	280.82	1	0	1	0	0	0	0.015643
7758	280.853	1	0	1	0	0	0	0.0155837
7760	280.887	1	0	1	0	0	0	0.0156352
7762	280.92	1	0	1	0	0	0	0.0155756
7764	280.953	1	0	1	0	0	0	0.0157012
7766	280.987	1	0	1	0	0	0	0.0155313
7768	281.02	1	0	1	0	0	0	0.0153272
7770	281.053	1	0	1	0	0	0	0.015426
7772	281.087	1	0	1	0	0	0	0.0155563
7774	281.12	1	0	1	0	0	0	0.0156646
7776	281.153	1	0	1	0	0	0	0.0154913
7778	281.187	1	0	1	0	0	0	0.0154981
7780	281.22	1	0	1	0	0	0	0.0153543
7782	281.253	1	0	1	0	0	0	0.015267
7784	281.287	1	0	1	0	0	0	0.0152741
7786	281.32	1	0	1	0	0	0	0.0154233
7788	281.353	1	0	1	0	0	0	0.0155089
7790	281.387	1	0	1	0	0	0	0.0153932
7792	281.42	1	0	1	0	0	0	0.0154924
7794	281.453	1	0	1	0	0	0	0.0155604
7796	281.487	1	0	1	0	0	0	0.0156264
7798	281.52	1	0	1	0	0	0	0.01567
7800	281.553	1	0	1	0	0	0	0.0155441
7802	281.587	1	0	1	0	0	0	0.015532
7804	281.62	1	0	1	0	0	0	0.0154883
7806	281.653	1	0	1	0	0	0	0.0154034
7808	281.687	1	0	1	0	0	0	0.0155117
7810	281.72	1	0	1	0	0	0	0.0155831
7812	281.753	1	0	1	0	0	0	0.0156453
7814	281.787	1	0	1	0	0	0	0.0155628
7816	281.82	1	0	1	0	0	0	0.0155807
7818	281.853	1	0	1	0	0	0	0.0155211
7820	281.887	1	0	1	0	0	0	0.0154995
7822	281.92	1	0	1	0	0	0	0.0155441
7824	281.953	1	0	1	0	0	0	0.0156511
7826	281.987	1	0	1	0	0	0	0.0156446
7828	282.02	1	0	1	0	0	0	0.0157032
7830	282.053	1	0	1	0	0	0	0.0155729
7832	282.087	1	0	1	0	0	0	0.0156514
7834	282.12	1	0	1	0	0	0	0.0156981
7836	282.153	1	0	1	0	0	0	0.0156809
7838	282.187	1	0	1	0	0	0	0.0156521
7840	282.22	1	0	1	0	0	0	0.0157868
7842	282.253	1	0	1	0	0	0	0.0157374
7844	282.287	1	0	1	0	0	0	0.0158348
7846	282.32	1	0	1	0	0	0	0.0158562
7848	282.353	1	0	1	0	0	0	0.0156606
7850	282.387	1	0	1	0	0	0	0.0156206
7852	282.42	1	0	1	0	0	0	0.015733
7854	282.453	1	0	1	0	0	0	0.0156819
7856	282.487	1	0	1	0	0	0	0.0156883
7858	282.52	1	0	1	0	0	0	0.0157188
7860	282.553	1	0	1	0	0	0	0.0156602
7862	282.587	1	0	1	0	0	0	0.015626
7864	282.62	1	0	1	0	0	0	0.0157526
7866	282.653	1	0	1	0	0	0	0.0157127
7868	282.687	1	0	1	0	0	0	0.0156369
7870	282.72	1	0	1	0	0	0	0.0157035
7872	282.753	1	0	1	0	0	0	0.0156284
7874	282.787	1	0	1	0	0	0	0.0155787
7876	282.82	1	0	1	0	0	0	0.0156406
7878	282.853	1	0	1	0	0	0	0.0157177
7880	282.887	1	0	1	0	0	0	0.0156369
7882	282.92	1	0	1	0	0	0	0.0156074
7884	282.953	1	0	1	0	0	0	0.0155719
7886	282.987	1	0	1	0	0	0	0.0155235
7888	283.02	1	0	1	0	0	0	0.0156159
7890	283.053	1	0	1	0	0	0	0.0155279
7892	283.087	1	0	1	0	0	0	0.0155526
7894	283.12	1	0	1	0	0	0	0.0156582
7896	283.153	1	0	1	0	0	0	0.0156443
7898	283.187	1	0	1	0	0	0	0.015643
7900	283.22	1	0	1	0	0	0	0.0156311
7902	283.253	1	0	1	0	0	0	0.0156183
7904	283.287	1	0	1	0	0	0	0.0156331
7906	283.32	1	0	1	0	0	0	0.0157042
7908	283.353	1	0	1	0	0	0	0.0156589
7910	283.387	1	0	1	0	0	0	0.0156172
7912	283.42	1	0	1	0	0	0	0.015626
7914	283.453	1	0	1	0	0	0	0.0155787
7916	283.487	1	0	1	0	0	0	0.0156132
7918	283.52	1	0	1	0	0	0	0.0156013
7920	283.553	1	0	1	0	0	0	0.0155628
7922	283.587	1	0	1	0	0	0	0.0155221
7924	283.62	1	0	1	0	0	0	0.0156057
7926	283.653	1	0	1	0	0	0	0.0156352
7928	283.687	1	0	1	0	0	0	0.0156179
7930	283.72	1	0	1	0	0	0	0.0156507
7932	283.753	1	0	1	0	0	0	0.015649
7934	283.787	1	0	1	0	0	0	0.0156738
7936	283.82	1	0	1	0	0	0	0.0156518
7938	283.853	1	0	1	0	0	0	0.0155912
7940	283.887	1	0	1	0	0	0	0.0156047
7942	283.92	1	0	1	0	0	0	0.0156213
7944	283.953	1	0	1	0	0	0	0.0155076
7946	283.987	1	0	1	0	0	0	0.0155282
7948	284.02	1	0	1	0	0	0	0.0156474
7950	284.053	1	0	1	0	0	0	0.0155675
7952	284.087	1	0	1	0	0	0	0.0156267
7954	284.12	1	0	1	0	0	0	0.0157364
7956	284.153	1	0	1	0	0	0	0.0156758
7958	284.187	1	0	1	0	0	0	0.0156054
7960	284.22	1	0	1	0	0	0	0.0156281
7962	284.253	1	0	1	0	0	0	0.0155719
7964	284.287	1	0	1	0	0	0	0.0155296
7966	284.32	1	0	1	0	0	0	0.0155458
7968	284.353	1	0	1	0	0	0	0.0156044
7970	284.387	1	0	1	0	0	0	0.0155939
7972	284.42	1	0	1	0	0	0	0.0155841
7974	284.453	1	0	1	0	0	0	0.0157167
7976	284.487	1	0	1	0	0	0	0.0155702
7978	284.52	1	0	1	0	0	0	0.0157519
7980	284.553	1	0	1	0	0	0	0.0158227
7982	284.587	1	0	1	0	0	0	0.015665
7984	284.62	1	0	1	0	0	0	0.0156186
7986	284.653	1	0	1	0	0	0	0.0157993
7988	284.687	1	0	1	0	0	0	0.0157851
7990	284.72	1	0	1	0	0	0	0.0157682
7992	284.753	1	0	1	0	0	0	0.0158484
7994	284.787	1	0	1	0	0	0	0.0158707
7996	284.82	1	0	1	0	0	0	0.0159076
7998	284.853	1	0	1	0	0	0	0.0158964
8000	284.887	1	0	1	0	0	0	0.0160145
8002	284.92	1	0	1	0	0	0	0.0160115
8004	284.953	1	0	1	0	0	0	0.0161025
8006	284.987	1	0	1	0	0	0	0.0160866
8008	285.02	1	0	1	0	0	0	0.0160054
8010	285.053	1	0	1	0	0	0	0.016002
8012	285.087	1	0	1	0	0	0	0.0160271
8014	285.12	1	0	1	0	0	0	0.0160836
8016	285.153	1	0	1	0	0	0	0.0161255
8018	285.187	1	0	1	0	0	0	0.0160535
8020	285.22	1	0	1	0	0	0	0.0160122
8022	285.253	1	0	1	0	0	0	0.0158426
8024	285.287	1	0	1	0	0	0	0.015693
8026	285.32	1	0	1	0	0	0	0.0156389
8028	285.353	1	0	1	0	0	0	0.0157837
8030	285.387	1	0	1	0	0	0	0.0158521
8032	285.42	1	0	1	0	0	0	0.0158623
8034	285.453	1	0	1	0	0	0	0.0159347
8036	285.487	1	0	1	0	0	0	0.0159875
8038	285.52	1	0	1	0	0	0	0.0159465
8040	285.553	1	0	1	0	0	0	0.0158132
8042	285.587	1	0	1	0	0	0	0.0157252
8044	285.62	1	0	1	0	0	0	0.0156101
8046	285.653	1	0	1	0	0	0	0.0156788
8048	285.687	1	0	1	0	0	0	0.0156169
8050	285.72	1	0	1	0	0	0	0.0155651
8052	285.753	1	0	1	0	0	0	0.0158128
8054	285.787	1	0	1	0	0	0	0.0160572
8056	285.82	1	0	1	0	0	0	0.0161689
8058	285.853	1	0	1	0	0	0	0.0161834
8060	285.887	1	0	1	0	0	0	0.0159675
8062	285.92	1	0	1	0	0	0	0.015468
8064	285.953	1	0	1	0	0	0	0.0154606
8066	285.987	1	0	1	0	0	0	0.0155106
8068	286.02	1	0	1	0	0	0	0.0158771
8070	286.053	1	0	1	0	0	0	0.0159144
8072	286.087	1	0	1	0	0	0	0.0158761
8074	286.12	1	0	1	0	0	0	0.0156886
8076	286.153	1	0	1	0	0	0	0.0156738
8078	286.187	1	0	1	0	0	0	0.0156017
8080	286.22	1	0	1	0	0	0	0.0157712
8082	286.253	1	0	1	0	0	0	0.0159056
8084	286.286	1	0	1	0	0	0	0.0159387
8086	286.32	1	0	1	0	0	0	0.0159228
8088	286.353	1	0	1	0	0	0	0.015932
8090	286.386	1	0	1	0	0	0	0.0158873
8092	286.42	1	0	1	0	0	0	0.0158487
8094	286.453	1	0	1	0	0	0	0.0158172
8096	286.486	1	0	1	0	0	0	0.0159228
8098	286.52	1	0	1	0	0	0	0.015978
8100	286.553	1	0	1	0	0	0	0.0159634
8102	286.586	1	0	1	0	0	0	0.0159235
8104	286.62	1	0	1	0	0	0	0.0159191
8106	286.653	1	0	1	0	0	0	0.0158277
8108	286.686	1	0	1	0	0	0	0.0159303
8110	286.72	1	0	1	0	0	0	0.0160071
8112	286.753	1	0	1	0	0	0	0.0159499
8114	286.786	1	0	1	0	0	0	0.0157303
8116	286.82	1	0	1	0	0	0	0.0156809
8118	286.853	1	0	1	0	0	0	0.0156298
8120	286.886	1	0	1	0	0	0	0.0157496
8122	286.92	1	0	1	0	0	0	0.0156859
8124	286.953	1	0	1	0	0	0	0.0156023
8126	286.986	1	0	1	0	0	0	0.015557
8128	287.02	1	0	1	0	0	0	0.0155265
8130	287.053	1	0	1	0	0	0	0.0155482
8132	287.086	1	0	1	0	0	0	0.0157513
8134	287.12	1	0	1	0	0	0	0.0158849
8136	287.153	1	0	1	0	0	0	0.0160301
8138	287.186	1	0	1	0	0	0	0.0160359
8140	287.22	1	0	1	0	0	0	0.0160403
8142	287.253	1	0	1	0	0	0	0.0157296
8144	287.286	1	0	1	0	0	0	0.0153885
8146	287.32	1	0	1	0	0	0	0.0153127
8148	287.353	1	0	1	0	0	0	0.0154846
8150	287.386	1	0	1	0	0	0	0.0154917
8152	287.42	1	0	1	0	0	0	0.0155001
8154	287.453	1	0	1	0	0	0	0.0155255
8156	287.486	1	0	1	0	0	0	0.0155347
8158	287.52	1	0	1	0	0	0	0.015469
8160	287.553	1	0	1	0	0	0	0.0154985
8162	287.586	1	0	1	0	0	0	0.015803
8164	287.62	1	0	1	0	0	0	0.0158287
8166	287.653	1	0	1	0	0	0	0.0157465
8168	287.686	1	0	1	0	0	0	0.0156744
8170	287.72	1	0	1	0	0	0	0.0158988
8172	287.753	1	0	1	0	0	0	0.01591
8174	287.786	1	0	1	0	0	0	0.0159272
8176	287.82	1	0	1	0	0	0	0.0158832
8178	287.853	1	0	1	0	0	0	0.0158971
8180	287.886	1	0	1	0	0	0	0.0159861
8182	287.92	1	0	1	0	0	0	0.015998
8184	287.953	1	0	1	0	0	0	0.0159458
8186	287.986	1	0	1	0	0	0	0.0159895
8188	288.02	1	0	1	0	0	0	0.0157722
8190	288.053	1	0	1	0	0	0	0.0155932
8192	288.086	1	0	1	0	0	0	0.0154775
8194	288.12	1	0	1	0	0	0	0.0154105
8196	288.153	1	0	1	0	0	0	0.0155841
8198	288.186	1	0	1	0	0	0	0.0156893
8200	288.22	1	0	1	0	0	0	0.0157732
8202	288.253	1	0	1	0	0	0	0.0158379
8204	288.286	1	0	1	0	0	0	0.015645
8206	288.32	1	0	1	0	0	0	0.0155979
8208	288.353	1	0	1	0	0	0	0.0155746
8210	288.386	1	0	1	0	0	0	0.0154196
8212	288.42	1	0	1	0	0	0	0.0154768
8214	288.453	1	0	1	0	0	0	0.0155201
8216	288.486	1	0	1	0	0	0	0.0154832
8218	288.52	1	0	1	0	0	0	0.0155235
8220	288.553	1	0	1	0	0	0	0.0155282
8222	288.586	1	0	1	0	0	0	0.0155509
8224	288.62	1	0	1	0	0	0	0.0156423
8226	288.653	1	0	1	0	0	0	0.0155232
8228	288.686	1	0	1	0	0	0	0.0153776
8230	288.72	1	0	1	0	0	0	0.0155255
8232	288.753	1	0	1	0	0	0	0.0154511
8234	288.786	1	0	1	0	0	0	0.0154125
8236	288.82	1	0	1	0	0	0	0.0154094
8238	288.853	1	0	1	0	0	0	0.0154954
8240	288.886	1	0	1	0	0	0	0.0153973
8242	288.92	1	0	1	0	0	0	0.0154176
8244	288.953	1	0	1	0	0	0	0.0154825
8246	288.986	1	0	1	0	0	0	0.0155756
8248	289.02	1	0	1	0	0	0	0.0154903
8250	289.053	1	0	1	0	0	0	0.0154592
8252	289.086	1	0	1	0	0	0	0.0154815
8254	289.12	1	0	1	0	0	0	0.0155012
8256	289.153	1	0	1	0	0	0	0.0154866
8258	289.186	1	0	1	0	0	0	0.015401
8260	289.22	1	0	1	0	0	0	0.0153397
8262	289.253	1	0	1	0	0	0	0.0154125
8264	289.286	1	0	1	0	0	0	0.0154247
8266	289.32	1	0	1	0	0	0	0.0154067
8268	289.353	1	0	1	0	0	0	0.0154345
8270	289.386	1	0	1	0	0	0	0.0155015
8272	289.42	1	0	1	0	0	0	0.0154382
8274	289.453	1	0	1	0	0	0	0.0153269
8276	289.486	1	0	1	0	0	0	0.0153783
8278	289.52	1	0	1	0	0	0	0.0154961
8280	289.553	1	0	1	0	0	0	0.0155238
8282	289.586	1	0	1	0	0	0	0.0155049
8284	289.62	1	0	1	0	0	0	0.0155726
8286	289.653	1	0	1	0	0	0	0.0156271
8288	289.686	1	0	1	0	0	0	0.0156311
8290	289.72	1	0	1	0	0	0	0.0156348
8292	289.753	1	0	1	0	0	0	0.0156206
8294	289.786	1	0	1	0	0	0	0.0155391
8296	289.82	1	0	1	0	0	0	0.0153411
8298	289.853	1	0	1	0	0	0	0.0154284
8300	289.886	1	0	1	0	0	0	0.0153468
8302	289.92	1	0	1	0	0	0	0.0152866
8304	289.953	1	0	1	0	0	0	0.0152815
8306	289.986	1	0	1	0	0	0	0.0153898
8308	290.02	1	0	1	0	0	0	0.0153827
8310	290.053	1	0	1	0	0	0	0.0154034
8312	290.086	1	0	1	0	0	0	0.0153147
8314	290.12	1	0	1	0	0	0	0.0154666
8316	290.153	1	0	1	0	0	0	0.0152071
8318	290.186	1	0	1	0	0	0	0.0151204
8320	290.22	1	0	1	0	0	0	0.0153083
8322	290.253	1	0	1	0	0	0	0.0151177
8324	290.286	1	0	1	0	0	0	0.0150507
8326	290.32	1	0	1	0	0	0	0.0152115
8328	290.353	1	0	1	0	0	0	0.0153343
8330	290.386	1	0	1	0	0	0	0.0154179
8332	290.42	1	0	1	0	0	0	0.0155333
8334	290.453	1	0	1	0	0	0	0.0154663
8336	290.486	1	0	1	0	0	0	0.0154991
8338	290.52	1	0	1	0	0	0	0.0155089
8340	290.553	1	0	1	0	0	0	0.01549
8342	290.586	1	0	1	0	0	0	0.0155489
8344	290.62	1	0	1	0	0	0	0.0155198
8346	290.653	1	0	1	0	0	0	0.0154707
8348	290.686	1	0	1	0	0	0	0.0154565
8350	290.72	1	0	1	0	0	0	0.0155753
8352	290.753	1	0	1	0	0	0	0.0155584
8354	290.786	1	0	1	0	0	0	0.0155414
8356	290.82	1	0	1	0	0	0	0.0155533
8358	290.853	1	0	1	0	0	0	0.0155797
8360	290.886	1	0	1	0	0	0	0.0155732
8362	290.92	1	0	1	0	0	0	0.0155847
8364	290.953	1	0	1	0	0	0	0.0155732
8366	290.986	1	0	1	0	0	0	0.0155462
8368	291.02	1	0	1	0	0	0	0.0155387
8370	291.053	1	0	1	0	0	0	0.0155844
8372	291.086	1	0	1	0	0	0	0.0156095
8374	291.12	1	0	1	0	0	0	0.015643
8376	291.153	1	0	1	0	0	0	0.0156179
8378	291.186	1	0	1	0	0	0	0.0155675
8380	291.22	1	0	1	0	0	0	0.0156074
8382	291.253	1	0	1	0	0	0	0.0156223
8384	291.286	1	0	1	0	0	0	0.0156284
8386	291.32	1	0	1	0	0	0	0.0156
8388	291.353	1	0	1	0	0	0	0.0156237
8390	291.386	1	0	1	0	0	0	0.0155861
8392	291.42	1	0	1	0	0	0	0.0155299
8394	291.453	1	0	1	0	0	0	0.0155993
8396	291.486	1	0	1	0	0	0	0.0156704
8398	291.52	1	0	1	0	0	0	0.0155157
8400	291.553	1	0	1	0	0	0	0.0153665
8402	291.586	1	0	1	0	0	0	0.015532
8404	291.62	1	0	1	0	0	0	0.0152034
8406	291.653	1	0	1	0	0	0	0.0150866
8408	291.686	1	0	1	0	0	0	0.0151577
8410	291.72	1	0	1	0	0	0	0.0151749
8412	291.753	1	0	1	0	0	0	0.0150555
8414	291.786	1	0	1	0	0	0	0.0151844
8416	291.82	1	0	1	0	0	0	0.0150819
8418	291.853	1	0	1	0	0	0	0.0150924
8420	291.886	1	0	1	0	0	0	0.0150954
8422	291.92	1	0	1	0	0	0	0.0149759
8424	291.953	1	0	1	0	0	0	0.0149827
8426	291.986	1	0	1	0	0	0	0.0151045
8428	292.02	1	0	1	0	0	0	0.0151489
8430	292.053	1	0	1	0	0	0	0.0152853
8432	292.086	1	0	1	0	0	0	0.0152399
8434	292.12	1	0	1	0	0	0	0.0152853
8436	292.153	1	0	1	0	0	0	0.0152267
8438	292.186	1	0	1	0	0	0	0.0150497
8440	292.22	1	0	1	0	0	0	0.0149631
8442	292.253	1	0	1	0	0	0	0.0150423
8444	292.286	1	0	1	0	0	0	0.0148981
8446	292.32	1	0	1	0	0	0	0.0148094
8448	292.353	1	0	1	0	0	0	0.0149793
8450	292.386	1	0	1	0	0	0	0.0148825
8452	292.42	1	0	1	0	0	0	0.0148233
8454	292.453	1	0	1	0	0	0	0.0150717
8456	292.486	1	0	1	0	0	0	0.0150105
8458	292.52	1	0	1	0	0	0	0.0149756
8460	292.553	1	0	1	0	0	0	0.0150416
8462	292.586	1	0	1	0	0	0	0.0148291
8464	292.62	1	0	1	0	0	0	0.0147563
8466	292.653	1	0	1	0	0	0	0.0149265
8468	292.686	1	0	1	0	0	0	0.0149458
8470	292.72	1	0	1	0	0	0	0.0151259
8472	292.753	1	0	1	0	0	0	0.0152802
8474	292.786	1	0	1	0	0	0	0.015382
8476	292.82	1	0	1	0	0	0	0.0153739
8478	292.853	1	0	1	0	0	0	0.0152555
8480	292.886	1	0	1	0	0	0	0.0152365
8482	292.92	1	0	1	0	0	0	0.0152182
8484	292.953	1	0	1	0	0	0	0.0152873
8486	292.986	1	0	1	0	0	0	0.0154761
8488	293.02	1	0	1	0	0	0	0.0156866
8490	293.053	1	0	1	0	0	0	0.0155976
8492	293.086	1	0	1	0	0	0	0.015576
8494	293.12	1	0	1	0	0	0	0.0157492
8496	293.153	1	0	1	0	0	0	0.015732
8498	293.186	1	0	1	0	0	0	0.0155688
8500	293.22	1	0	1	0	0	0	0.0156108
8502	293.253	1	0	1	0	0	0	0.0154974
8504	293.286	1	0	1	0	0	0	0.0153702
8506	293.32	1	0	1	0	0	0	0.0154325
8508	293.353	1	0	1	0	0	0	0.0154551
8510	293.386	1	0	1	0	0	0	0.0154917
8512	293.42	1	0	1	0	0	0	0.0156139
8514	293.453	1	0	1	0	0	0	0.0156111
8516	293.486	1	0	1	0	0	0	0.0155655
8518	293.52	1	0	1	0	0	0	0.0156974
8520	293.553	1	0	1	0	0	0	0.0156677
8522	293.586	1	0	1	0	0	0	0.0157035
8524	293.62	1	0	1	0	0	0	0.0156365
8526	293.653	1	0	1	0	0	0	0.0157039
8528	293.686	1	0	1	0	0	0	0.0157655
8530	293.72	1	0	1	0	0	0	0.015733
8532	293.753	1	0	1	0	0	0	0.0157726
8534	293.786	1	0	1	0	0	0	0.0157743
8536	293.82	1	0	1	0	0	0	0.0157658
8538	293.853	1	0	1	0	0	0	0.0156426
8540	293.886	1	0	1	0	0	0	0.0155864
8542	293.92	1	0	1	0	0	0	0.0155644
8544	293.953	1	0	1	0	0	0	0.0156815
8546	293.986	1	0	1	0	0	0	0.0157414
8548	294.02	1	0	1	0	0	0	0.0156697
8550	294.053	1	0	1	0	0	0	0.0155814
8552	294.086	1	0	1	0	0	0	0.0155895
8554	294.12	1	0	1	0	0	0	0.0156626
8556	294.153	1	0	1	0	0	0	0.015733
8558	294.186	1	0	1	0	0	0	0.0157793
8560	294.22	1	0	1	0	0	0	0.0157428
8562	294.253	1	0	1	0	0	0	0.0157546
8564	294.286	1	0	1	0	0	0	0.0157313
8566	294.32	1	0	1	0	0	0	0.0157326
8568	294.353	1	0	1	0	0	0	0.0157739
8570	294.386	1	0	1	0	0	0	0.0158186
8572	294.42	1	0	1	0	0	0	0.0157607
8574	294.453	1	0	1	0	0	0	0.015799
8576	294.486	1	0	1	0	0	0	0.0158034
8578	294.52	1	0	1	0	0	0	0.0157993
8580	294.553	1	0	1	0	0	0	0.015843
8582	294.586	1	0	1	0	0	0	0.0157946
8584	294.62	1	0	1	0	0	0	0.0158271
8586	294.653	1	0	1	0	0	0	0.0157729
8588	294.686	1	0	1	0	0	0	0.0157455
8590	294.719	1	0	1	0	0	0	0.0157655
8592	294.753	1	0	1	0	0	0	0.0157672
8594	294.786	1	0	1	0	0	0	0.0157563
8596	294.819	1	0	1	0	0	0	0.0157198
8598	294.853	1	0	1	0	0	0	0.0157536
8600	294.886	1	0	1	0	0	0	0.0157435
8602	294.919	1	0	1	0	0	0	0.0156853
8604	294.953	1	0	1	0	0	0	0.0157225
8606	294.986	1	0	1	0	0	0	0.0157546
8608	295.019	1	0	1	0	0	0	0.0157316
8610	295.053	1	0	1	0	0	0	0.0157688
8612	295.086	1	0	1	0	0	0	0.0157394
8614	295.119	1	0	1	0	0	0	0.0156629
8616	295.153	1	0	1	0	0	0	0.0157326
8618	295.186	1	0	1	0	0	0	0.0156602
8620	295.219	1	0	1	0	0	0	0.015671
8622	295.253	1	0	1	0	0	0	0.0157408
8624	295.286	1	0	1	0	0	0	0.0156785
8626	295.319	1	0	1	0	0	0	0.0156985
8628	295.353	1	0	1	0	0	0	0.0157015
8630	295.386	1	0	1	0	0	0	0.015693
8632	295.419	1	0	1	0	0	0	0.0157032
8634	295.453	1	0	1	0	0	0	0.0157252
8636	295.486	1	0	1	0	0	0	0.0156788
8638	295.519	1	0	1	0	0	0	0.0157411
8640	295.553	1	0	1	0	0	0	0.0157983
8642	295.586	1	0	1	0	0	0	0.0157289
8644	295.619	1	0	1	0	0	0	0.0157296
8646	295.653	1	0	1	0	0	0	0.0157584
8648	295.686	1	0	1	0	0	0	0.0157394
8650	295.719	1	0	1	0	0	0	0.0157644
8652	295.753	1	0	1	0	0	0	0.0157753
8654	295.786	1	0	1	0	0	0	0.0157228
8656	295.819	1	0	1	0	0	0	0.0157343
8658	295.853	1	0	1	0	0	0	0.0157485
8660	295.886	1	0	1	0	0	0	0.0157428
8662	295.919	1	0	1	0	0	0	0.0157079
8664	295.953	1	0	1	0	0	0	0.0157556
8666	295.986	1	0	1	0	0	0	0.0157008
8668	296.019	1	0	1	0	0	0	0.0157001
8670	296.053	1	0	1	0	0	0	0.0157262
8672	296.086	1	0	1	0	0	0	0.0156832
8674	296.119	1	0	1	0	0	0	0.0156751
8676	296.153	1	0	1	0	0	0	0.0157015
8678	296.186	1	0	1	0	0	0	0.015669
8680	296.219	1	0	1	0	0	0	0.015734
8682	296.253	1	0	1	0	0	0	0.0156501
8684	296.286	1	0	1	0	0	0	0.0156538
8686	296.319	1	0	1	0	0	0	0.0156257
8688	296.353	1	0	1	0	0	0	0.0156335
8690	296.386	1	0	1	0	0	0	0.0156721
8692	296.419	1	0	1	0	0	0	0.0156985
8694	296.453	1	0	1	0	0	0	0.0156958
8696	296.486	1	0	1	0	0	0	0.0156227
8698	296.519	1	0	1	0	0	0	0.0157201
8700	296.553	1	0	1	0	0	0	0.015711
8702	296.586	1	0	1	0	0	0	0.0156284
8704	296.619	1	0	1	0	0	0	0.0156501
8706	296.653	1	0	1	0	0	0	0.0157309
8708	296.686	1	0	1	0	0	0	0.0157739
8710	296.719	1	0	1	0	0	0	0.015737
8712	296.753	1	0	1	0	0	0	0.0157584
8714	296.786	1	0	1	0	0	0	0.0157255
8716	296.819	1	0	1	0	0	0	0.0157205
8718	296.853	1	0	1	0	0	0	0.0158152
8720	296.886	1	0	1	0	0	0	0.0157743
8722	296.919	1	0	1	0	0	0	0.0157675
8724	296.953	1	0	1	0	0	0	0.015778
8726	296.986	1	0	1	0	0	0	0.0157333
8728	297.019	1	0	1	0	0	0	0.0157594
8730	297.053	1	0	1	0	0	0	0.0157709
8732	297.086	1	0	1	0	0	0	0.0157245
8734	297.119	1	0	1	0	0	0	0.0156805
8736	297.153	1	0	1	0	0	0	0.0157519
8738	297.186	1	0	1	0	0	0	0.015712
8740	297.219	1	0	1	0	0	0	0.0157499
8742	297.253	1	0	1	0	0	0	0.0157875
8744	297.286	1	0	1	0	0	0	0.0156981
8746	297.319	1	0	1	0	0	0	0.0156832
8748	297.353	1	0	1	0	0	0	0.0157066
8750	297.386	1	0	1	0	0	0	0.015668
8752	297.419	1	0	1	0	0	0	0.015733
8754	297.453	1	0	1	0	0	0	0.0157069
8756	297.486	1	0	1	0	0	0	0.0156413
8758	297.519	1	0	1	0	0	0	0.0155905
8760	297.553	1	0	1	0	0	0	0.0156074
8762	297.586	1	0	1	0	0	0	0.0155073
8764	297.619	1	0	1	0	0	0	0.0154558
8766	297.653	1	0	1	0	0	0	0.0155871
8768	297.686	1	0	1	0	0	0	0.0155831
8770	297.719	1	0	1	0	0	0	0.0155685
8772	297.753	1	0	1	0	0	0	0.0156067
8774	297.786	1	0	1	0	0	0	0.0155773
8776	297.819	1	0	1	0	0	0	0.0155492
8778	297.853	1	0	1	0	0	0	0.0156183
8780	297.886	1	0	1	0	0	0	0.0156169
8782	297.919	1	0	1	0	0	0	0.0156118
8784	297.953	1	0	1	0	0	0	0.015581
8786	297.986	1	0	1	0	0	0	0.0156443
8788	298.019	1	0	1	0	0	0	0.0156233
8790	298.053	1	0	1	0	0	0	0.015582
8792	298.086	1	0	1	0	0	0	0.0154714
8794	298.119	1	0	1	0	0	0	0.0155299
8796	298.153	1	0	1	0	0	0	0.0155194
8798	298.186	1	0	1	0	0	0	0.0155184
8800	298.219	1	0	1	0	0	0	0.0154876
8802	298.253	1	0	1	0	0	0	0.0154734
8804	298.286	1	0	1	0	0	0	0.0155137
8806	298.319	1	0	1	0	0	0	0.0155391
8808	298.353	1	0	1	0	0	0	0.0156419
8810	298.386	1	0	1	0	0	0	0.0157709
8812	298.419	1	0	1	0	0	0	0.0158623
8814	298.453	1	0	1	0	0	0	0.015803
8816	298.486	1	0	1	0	0	0	0.0158447
8818	298.519	1	0	1	0	0	0	0.0158694
8820	298.553	1	0	1	0	0	0	0.0158575
8822	298.586	1	0	1	0	0	0	0.0158369
8824	298.619	1	0	1	0	0	0	0.015825
8826	298.653	1	0	1	0	0	0	0.015799
8828	298.686	1	0	1	0	0	0	0.0157824
8830	298.719	1	0	1	0	0	0	0.015736
8832	298.753	1	0	1	0	0	0	0.0156778
8834	298.786	1	0	1	0	0	0	0.0157418
8836	298.819	1	0	1	0	0	0	0.0157242
8838	298.853	1	0	1	0	0	0	0.0155915
8840	298.886	1	0	1	0	0	0	0.0153983
8842	298.919	1	0	1	0	0	0	0.0154981
8844	298.953	1	0	1	0	0	0	0.0155215
8846	298.986	1	0	1	0	0	0	0.0154142
8848	299.019	1	0	1	0	0	0	0.0154338
8850	299.053	1	0	1	0	0	0	0.0154182
8852	299.086	1	0	1	0	0	0	0.0152954
8854	299.119	1	0	1	0	0	0	0.0153448
8856	299.153	1	0	1	0	0	0	0.0155012
8858	299.186	1	0	1	0	0	0	0.0154399
8860	299.219	1	0	1	0	0	0	0.0155428
8862	299.253	1	0	1	0	0	0	0.0154622
8864	299.286	1	0	1	0	0	0	0.0153966
8866	299.319	1	0	1	0	0	0	0.0155282
8868	299.353	1	0	1	0	0	0	0.0154284
8870	299.386	1	0	1	0	0	0	0.0154196
8872	299.419	1	0	1	0	0	0	0.0154122
8874	299.453	1	0	1	0	0	0	0.0154734
8876	299.486	1	0	1	0	0	0	0.0154514
8878	299.519	1	0	1	0	0	0	0.0155245
8880	299.553	1	0	1	0	0	0	0.0155045
8882	299.586	1	0	1	0	0	0	0.0154849
8884	299.619	1	0	1	0	0	0	0.0154585
8886	299.653	1	0	1	0	0	0	0.0154169
8888	299.686	1	0	1	0	0	0	0.0154474
8890	299.719	1	0	1	0	0	0	0.0154176
8892	299.753	1	0	1	0	0	0	0.0154592
8894	299.786	1	0	1	0	0	0	0.0154325
8896	299.819	1	0	1	0	0	0	0.0153973
8898	299.853	1	0	1	0	0	0	0.0153671
8900	299.886	1	0	1	0	0	0	0.0154362
8902	299.919	1	0	1	0	0	0	0.0154071
8904	299.953	1	0	1	0	0	0	0.015423
8906	299.986	1	0	1	0	0	0	0.0154345
8908	300.019	1	0	1	0	0	0	0.0154639
8910	300.053	1	0	1	0	0	0	0.0154017
8912	300.086	1	0	1	0	0	0	0.0154947
8914	300.119	1	0	1	0	0	0	0.0154897
8916	300.153	1	0	1	0	0	0	0.0155083
8918	300.186	1	0	1	0	0	0	0.0155286
8920	300.219	1	0	1	0	0	0	0.0155536
8922	300.253	1	0	1	0	0	0	0.015602
8924	300.286	1	0	1	0	0	0	0.0154673
8926	300.319	1	0	1	0	0	0	0.0154636
8928	300.353	1	0	1	0	0	0	0.0154934
8930	300.386	1	0	1	0	0	0	0.0155265
8932	300.419	1	0	1	0	0	0	0.0155323
8934	300.453	1	0	1	0	0	0	0.0157875
8936	300.486	1	0	1	0	0	0	0.0159032
8938	300.519	1	0	1	0	0	0	0.0158856
8940	300.553	1	0	1	0	0	0	0.0158714
8942	300.586	1	0	1	0	0	0	0.0158345
8944	300.619	1	0	1	0	0	0	0.015865
8946	300.653	1	0	1	0	0	0	0.0158375
8948	300.686	1	0	1	0	0	0	0.0158375
8950	300.719	1	0	1	0	0	0	0.0158903
8952	300.753	1	0	1	0	0	0	0.015911
8954	300.786	1	0	1	0	0	0	0.0159699
8956	300.819	1	0	1	0	0	0	0.0158981
8958	300.853	1	0	1	0	0	0	0.0158024
8960	300.886	1	0	1	0	0	0	0.0158954
8962	300.919	1	0	1	0	0	0	0.0158958
8964	300.953	1	0	1	0	0	0	0.0158951
8966	300.986	1	0	1	0	0	0	0.0159462
8968	301.019	1	0	1	0	0	0	0.0158433
8970	301.053	1	0	1	0	0	0	0.0158291
8972	301.086	1	0	1	0	0	0	0.0158078
8974	301.119	1	0	1	0	0	0	0.0157651
8976	301.153	1	0	1	0	0	0	0.015712
8978	301.186	1	0	1	0	0	0	0.0157881
8980	301.219	1	0	1	0	0	0	0.0156853
8982	301.253	1	0	1	0	0	0	0.0155783
8984	301.286	1	0	1	0	0	0	0.0155567
8986	301.319	1	0	1	0	0	0	0.015532
8988	301.353	1	0	1	0	0	0	0.0154836
8990	301.386	1	0	1	0	0	0	0.0155891
8992	301.419	1	0	1	0	0	0	0.0155773
8994	301.453	1	0	1	0	0	0	0.0155076
8996	301.486	1	0	1	0	0	0	0.0155868
8998	301.519	1	0	1	0	0	0	0.0156656
9000	301.553	1	0	1	0	0	0	0.0155929
9002	301.586	1	0	1	0	0	0	0.0155512
9004	301.619	1	0	1	0	0	0	0.0155076
9006	301.653	1	0	1	0	0	0	0.0154626
9008	301.686	1	0	1	0	0	0	0.0155001
9010	301.719	1	0	1	0	0	0	0.0156382
9012	301.753	1	0	1	0	0	0	0.0156704
9014	301.786	1	0	1	0	0	0	0.0157269
9016	301.819	1	0	1	0	0	0	0.0157479
9018	301.853	1	0	1	0	0	0	0.0157093
9020	301.886	1	0	1	0	0	0	0.0157194
9022	301.919	1	0	1	0	0	0	0.0157746
9024	301.953	1	0	1	0	0	0	0.0157255
9026	301.986	1	0	1	0	0	0	0.0156446
9028	302.019	1	0	1	0	0	0	0.0156281
9030	302.053	1	0	1	0	0	0	0.0154944
9032	302.086	1	0	1	0	0	0	0.0154765
9034	302.119	1	0	1	0	0	0	0.015444
9036	302.153	1	0	1	0	0	0	0.0152365
9038	302.186	1	0	1	0	0	0	0.0152805
9040	302.219	1	0	1	0	0	0	0.0152138
9042	302.253	1	0	1	0	0	0	0.015204
9044	302.286	1	0	1	0	0	0	0.0151837
9046	302.319	1	0	1	0	0	0	0.0151536
9048	302.353	1	0	1	0	0	0	0.01507
9050	302.386	1	0	1	0	0	0	0.0151343
9052	302.419	1	0	1	0	0	0	0.0152132
9054	302.453	1	0	1	0	0	0	0.0151726
9056	302.486	1	0	1	0	0	0	0.015111
9058	302.519	1	0	1	0	0	0	0.0151993
9060	302.553	1	0	1	0	0	0	0.0151144
9062	302.586	1	0	1	0	0	0	0.0150846
9064	302.619	1	0	1	0	0	0	0.0152406
9066	302.653	1	0	1	0	0	0	0.0151621
9068	302.686	1	0	1	0	0	0	0.0152196
9070	302.719	1	0	1	0	0	0	0.0153367
9072	302.753	1	0	1	0	0	0	0.0154362
9074	302.786	1	0	1	0	0	0	0.0153668
9076	302.819	1	0	1	0	0	0	0.0153025
9078	302.853	1	0	1	0	0	0	0.0153394
9080	302.886	1	0	1	0	0	0	0.0150937
9082	302.919	1	0	1	0	0	0	0.0147979
9084	302.953	1	0	1	0	0	0	0.0151231
9086	302.986	1	0	1	0	0	0	0.0148568
9088	303.019	1	0	1	0	0	0	0.014625
9090	303.053	1	0	1	0	0	0	0.0145844
9092	303.086	1	0	1	0	0	0	0.0144731
9094	303.119	1	0	1	0	0	0	0.0145749
9096	303.153	1	0	1	0	0	0	0.0145942
9098	303.186	1	0	1	0	0	0	0.0145137
9100	303.219	1	0	1	0	0	0	0.0146216
9102	303.252	1	0	1	0	0	0	0.0149472
9104	303.286	1	0	1	0	0	0	0.0148548
9106	303.319	1	0	1	0	0	0	0.0147062
9108	303.352	1	0	1	0	0	0	0.0145956
9110	303.386	1	0	1	0	0	0	0.0145154
9112	303.419	1	0	1	0	0	0	0.0146653
9114	303.452	1	0	1	0	0	0	0.014649
9116	303.486	1	0	1	0	0	0	0.0145411
9118	303.519	1	0	1	0	0	0	0.014604
9120	303.552	1	0	1	0	0	0	0.0147888
9122	303.586	1	0	1	0	0	0	0.0147384
9124	303.619	1	0	1	0	0	0	0.014823
9126	303.652	1	0	1	0	0	0	0.0149177
9128	303.686	1	0	1	0	0	0	0.0150707
9130	303.719	1	0	1	0	0	0	0.0149472
9132	303.752	1	0	1	0	0	0	0.0147969
9134	303.786	1	0	1	0	0	0	0.0145918
9136	303.819	1	0	1	0	0	0	0.0146659
9138	303.852	1	0	1	0	0	0	0.0146104
9140	303.886	1	0	1	0	0	0	0.0146341
9142	303.919	1	0	1	0	0	0	0.0146385
9144	303.952	1	0	1	0	0	0	0.01476
9146	303.986	1	0	1	0	0	0	0.014778
9148	304.019	1	0	1	0	0	0	0.0147729
9150	304.052	1	0	1	0	0	0	0.0149363
9152	304.086	1	0	1	0	0	0	0.0146978
9154	304.119	1	0	1	0	0	0	0.0146192
9156	304.152	1	0	1	0	0	0	0.0146954
9158	304.186	1	0	1	0	0	0	0.014671
9160	304.219	1	0	1	0	0	0	0.0146368
9162	304.252	1	0	1	0	0	0	0.0147932
9164	304.286	1	0	1	0	0	0	0.0149553
9166	304.319	1	0	1	0	0	0	0.0149705
9168	304.352	1	0	1	0	0	0	0.0148859
9170	304.386	1	0	1	0	0	0	0.0149201
9172	304.419	1	0	1	0	0	0	0.0147536
9174	304.452	1	0	1	0	0	0	0.0146829
9176	304.486	1	0	1	0	0	0	0.0147604
9178	304.519	1	0	1	0	0	0	0.0147414
9180	304.552	1	0	1	0	0	0	0.0147123
9182	304.586	1	0	1	0	0	0	0.0148101
9184	304.619	1	0	1	0	0	0	0.0148883
9186	304.652	1	0	1	0	0	0	0.0150281
9188	304.686	1	0	1	0	0	0	0.0149773
9190	304.719	1	0	1	0	0	0	0.0149421
9192	304.752	1	0	1	0	0	0	0.014934
9194	304.786	1	0	1	0	0	0	0.0148118
9196	304.819	1	0	1	0	0	0	0.014801
9198	304.852	1	0	1	0	0	0	0.0147939
9200	304.886	1	0	1	0	0	0	0.0147533
9202	304.919	1	0	1	0	0	0	0.0148372
9204	304.952	1	0	1	0	0	0	0.0148978
9206	304.986	1	0	1	0	0	0	0.015066
9208	305.019	1	0	1	0	0	0	0.0151739
9210	305.052	1	0	1	0	0	0	0.0152589
9212	305.086	1	0	1	0	0	0	0.0154589
9214	305.119	1	0	1	0	0	0	0.0155364
9216	305.152	1	0	1	0	0	0	0.0154308
9218	305.186	1	0	1	0	0	0	0.0154128
9220	305.219	1	0	1	0	0	0	0.0154985
9222	305.252	1	0	1	0	0	0	0.0153929
9224	305.286	1	0	1	0	0	0	0.0153448
9226	305.319	1	0	1	0	0	0	0.0153875
9228	305.352	1	0	1	0	0	0	0.0153391
9230	305.386	1	0	1	0	0	0	0.0152182
9232	305.419	1	0	1	0	0	0	0.0151719
9234	305.452	1	0	1	0	0	0	0.015337
9236	305.486	1	0	1	0	0	0	0.0154155
9238	305.519	1	0	1	0	0	0	0.0154152
9240	305.552	1	0	1	0	0	0	0.0154809
9242	305.586	1	0	1	0	0	0	0.0155164
9244	305.619	1	0	1	0	0	0	0.0154954
9246	305.652	1	0	1	0	0	0	0.0154369
9248	305.686	1	0	1	0	0	0	0.0153763
9250	305.719	1	0	1	0	0	0	0.0152798
9252	305.752	1	0	1	0	0	0	0.0152027
9254	305.786	1	0	1	0	0	0	0.014824
9256	305.819	1	0	1	0	0	0	0.0148565
9258	305.852	1	0	1	0	0	0	0.0152893
9260	305.886	1	0	1	0	0	0	0.0153299
9262	305.919	1	0	1	0	0	0	0.0152396
9264	305.952	1	0	1	0	0	0	0.0152
9266	305.986	1	0	1	0	0	0	0.015224
9268	306.019	1	0	1	0	0	0	0.0150727
9270	306.052	1	0	1	0	0	0	0.0150294
9272	306.086	1	0	1	0	0	0	0.0150582
9274	306.119	1	0	1	0	0	0	0.0150832
9276	306.152	1	0	1	0	0	0	0.014977
9278	306.186	1	0	1	0	0	0	0.0148967
9280	306.219	1	0	1	0	0	0	0.0149343
9282	306.252	1	0	1	0	0	0	0.0150548
9284	306.286	1	0	1	0	0	0	0.0150558
9286	306.319	1	0	1	0	0	0	0.0151695
9288	306.352	1	0	1	0	0	0	0.015047
9290	306.386	1	0	1	0	0	0	0.0150825
9292	306.419	1	0	1	0	0	0	0.0151939
9294	306.452	1	0	1	0	0	0	0.0150934
9296	306.486	1	0	1	0	0	0	0.0152656
9298	306.519	1	0	1	0	0	0	0.0154118
9300	306.552	1	0	1	0	0	0	0.0154754
9302	306.586	1	0	1	0	0	0	0.0154829
9304	306.619	1	0	1	0	0	0	0.0154741
9306	306.652	1	0	1	0	0	0	0.0154802
9308	306.686	1	0	1	0	0	0	0.0155008
9310	306.719	1	0	1	0	0	0	0.015488
9312	306.752	1	0	1	0	0	0	0.0154903
9314	306.786	1	0	1	0	0	0	0.0155357
9316	306.819	1	0	1	0	0	0	0.0155167
9318	306.852	1	0	1	0	0	0	0.015577
9320	306.886	1	0	1	0	0	0	0.015465
9322	306.919	1	0	1	0	0	0	0.0154957
9324	306.952	1	0	1	0	0	0	0.0155265
9326	306.986	1	0	1	0	0	0	0.0156051
9328	307.019	1	0	1	0	0	0	0.0156487
9330	307.052	1	0	1	0	0	0	0.0156355
9332	307.086	1	0	1	0	0	0	0.0155963
9334	307.119	1	0	1	0	0	0	0.0156802
9336	307.152	1	0	1	0	0	0	0.0156467
9338	307.186	1	0	1	0	0	0	0.0156125
9340	307.219	1	0	1	0	0	0	0.0155831
9342	307.252	1	0	1	0	0	0	0.0155793
9344	307.286	1	0	1	0	0	0	0.0155854
9346	307.319	1	0	1	0	0	0	0.0156071
9348	307.352	1	0	1	0	0	0	0.0155367
9350	307.386	1	0	1	0	0	0	0.0155232
9352	307.419	1	0	1	0	0	0	0.0154568
9354	307.452	1	0	1	0	0	0	0.0153695
9356	307.486	1	0	1	0	0	0	0.0153831
9358	307.519	1	0	1	0	0	0	0.0154051
9360	307.552	1	0	1	0	0	0	0.0154484
9362	307.586	1	0	1	0	0	0	0.015466
9364	307.619	1	0	1	0	0	0	0.0153634
9366	307.652	1	0	1	0	0	0	0.0153472
9368	307.686	1	0	1	0	0	0	0.0154281
9370	307.719	1	0	1	0	0	0	0.0154152
9372	307.752	1	0	1	0	0	0	0.0154314
9374	307.786	1	0	1	0	0	0	0.0154582
9376	307.819	1	0	1	0	0	0	0.0154223
9378	307.852	1	0	1	0	0	0	0.0154223
9380	307.886	1	0	1	0	0	0	0.015402
9382	307.919	1	0	1	0	0	0	0.0154748
9384	307.952	1	0	1	0	0	0	0.0154592
9386	307.986	1	0	1	0	0	0	0.015493
9388	308.019	1	0	1	0	0	0	0.0154724
9390	308.052	1	0	1	0	0	0	0.0154264
9392	308.086	1	0	1	0	0	0	0.0154304
9394	308.119	1	0	1	0	0	0	0.0154585
9396	308.152	1	0	1	0	0	0	0.0154545
9398	308.186	1	0	1	0	0	0	0.0155164
9400	308.219	1	0	1	0	0	0	0.0154578
9402	308.252	1	0	1	0	0	0	0.0154934
9404	308.286	1	0	1	0	0	0	0.0155221
9406	308.319	1	0	1	0	0	0	0.0155171
9408	308.352	1	0	1	0	0	0	0.0154758
9410	308.386	1	0	1	0	0	0	0.0155113
9412	308.419	1	0	1	0	0	0	0.0155188
9414	308.452	1	0	1	0	0	0	0.0155364
9416	308.486	1	0	1	0	0	0	0.0155553
9418	308.519	1	0	1	0	0	0	0.0155096
9420	308.552	1	0	1	0	0	0	0.0155272
9422	308.586	1	0	1	0	0	0	0.0155211
9424	308.619	1	0	1	0	0	0	0.0155553
9426	308.652	1	0	1	0	0	0	0.0156017
9428	308.686	1	0	1	0	0	0	0.0155729
9430	308.719	1	0	1	0	0	0	0.0155702
9432	308.752	1	0	1	0	0	0	0.0156375
9434	308.786	1	0	1	0	0	0	0.0156074
9436	308.819	1	0	1	0	0	0	0.015579
9438	308.852	1	0	1	0	0	0	0.0156446
9440	308.886	1	0	1	0	0	0	0.0156311
9442	308.919	1	0	1	0	0	0	0.0156392
9444	308.952	1	0	1	0	0	0	0.0156494
9446	308.986	1	0	1	0	0	0	0.0156568
9448	309.019	1	0	1	0	0	0	0.0156531
9450	309.052	1	0	1	0	0	0	0.0156
9452	309.086	1	0	1	0	0	0	0.0155292
9454	309.119	1	0	1	0	0	0	0.0156345
9456	309.152	1	0	1	0	0	0	0.0155672
9458	309.186	1	0	1	0	0	0	0.0155171
9460	309.219	1	0	1	0	0	0	0.0156
9462	309.252	1	0	1	0	0	0	0.0155286
9464	309.286	1	0	1	0	0	0	0.0154636
9466	309.319	1	0	1	0	0	0	0.0154819
9468	309.352	1	0	1	0	0	0	0.0154961
9470	309.386	1	0	1	0	0	0	0.0154318
9472	309.419	1	0	1	0	0	0	0.0154545
9474	309.452	1	0	1	0	0	0	0.0154612
9476	309.486	1	0	1	0	0	0	0.0155181
9478	309.519	1	0	1	0	0	0	0.0155073
9480	309.552	1	0	1	0	0	0	0.0155113
9482	309.586	1	0	1	0	0	0	0.0154511
9484	309.619	1	0	1	0	0	0	0.0155567
9486	309.652	1	0	1	0	0	0	0.0154626
9488	309.686	1	0	1	0	0	0	0.015467
9490	309.719	1	0	1	0	0	0	0.0154934
9492	309.752	1	0	1	0	0	0	0.0155665
9494	309.786	1	0	1	0	0	0	0.0156091
9496	309.819	1	0	1	0	0	0	0.0155445
9498	309.852	1	0	1	0	0	0	0.0155526
9500	309.886	1	0	1	0	0	0	0.0155519
9502	309.919	1	0	1	0	0	0	0.0155509
9504	309.952	1	0	1	0	0	0	0.0154985
9506	309.986	1	0	1	0	0	0	0.0155242
9508	310.019	1	0	1	0	0	0	0.015489
9510	310.052	1	0	1	0	0	0	0.0154927
9512	310.086	1	0	1	0	0	0	0.0155482
9514	310.119	1	0	1	0	0	0	0.0155831
9516	310.152	1	0	1	0	0	0	0.0155614
9518	310.186	1	0	1	0	0	0	0.0155333
9520	310.219	1	0	1	0	0	0	0.015556
9522	310.252	1	0	1	0	0	0	0.0155191
9524	310.286	1	0	1	0	0	0	0.0155157
9526	310.319	1	0	1	0	0	0	0.0154761
9528	310.352	1	0	1	0	0	0	0.0154812
9530	310.386	1	0	1	0	0	0	0.0154751
9532	310.419	1	0	1	0	0	0	0.015467
9534	310.452	1	0	1	0	0	0	0.015447
9536	310.486	1	0	1	0	0	0	0.0155364
9538	310.519	1	0	1	0	0	0	0.0155205
9540	310.552	1	0	1	0	0	0	0.0154467
9542	310.586	1	0	1	0	0	0	0.0154839
9544	310.619	1	0	1	0	0	0	0.0155076
9546	310.652	1	0	1	0	0	0	0.0154815
9548	310.686	1	0	1	0	0	0	0.0154924
9550	310.719	1	0	1	0	0	0	0.0155282
9552	310.752	1	0	1	0	0	0	0.0155336
9554	310.786	1	0	1	0	0	0	0.0155688
9556	310.819	1	0	1	0	0	0	0.0156101
9558	310.852	1	0	1	0	0	0	0.0157634
9560	310.886	1	0	1	0	0	0	0.0157634
9562	310.919	1	0	1	0	0	0	0.0158687
9564	310.952	1	0	1	0	0	0	0.0158254
9566	310.986	1	0	1	0	0	0	0.0158203
9568	311.019	1	0	1	0	0	0	0.015757
9570	311.052	1	0	1	0	0	0	0.015779
9572	311.086	1	0	1	0	0	0	0.0157898
9574	311.119	1	0	1	0	0	0	0.0156694
9576	311.152	1	0	1	0	0	0	0.0156257
9578	311.186	1	0	1	0	0	0	0.0156243
9580	311.219	1	0	1	0	0	0	0.0156524
9582	311.252	1	0	1	0	0	0	0.0155675
9584	311.286	1	0	1	0	0	0	0.0155577
9586	311.319	1	0	1	0	0	0	0.015489
9588	311.352	1	0	1	0	0	0	0.0155814
9590	311.386	1	0	1	0	0	0	0.0155858
9592	311.419	1	0	1	0	0	0	0.0155096
9594	311.452	1	0	1	0	0	0	0.0154829
9596	311.486	1	0	1	0	0	0	0.0155594
9598	311.519	1	0	1	0	0	0	0.015554
9600	311.552	1	0	1	0	0	0	0.0155925
9602	311.586	1	0	1	0	0	0	0.015625
9604	311.619	1	0	1	0	0	0	0.0155875
9606	311.652	1	0	1	0	0	0	0.0155614
9608	311.686	1	0	1	0	0	0	0.0153915
9610	311.719	1	0	1	0	0	0	0.0153404
9612	311.752	1	0	1	0	0	0	0.0152984
9614	311.785	1	0	1	0	0	0	0.015359
9616	311.819	1	0	1	0	0	0	0.0153299
9618	311.852	1	0	1	0	0	0	0.0152937
9620	311.885	1	0	1	0	0	0	0.0152497
9622	311.919	1	0	1	0	0	0	0.0152118
9624	311.952	1	0	1	0	0	0	0.0152318
9626	311.985	1	0	1	0	0	0	0.0151827
9628	312.019	1	0	1	0	0	0	0.0152186
9630	312.052	1	0	1	0	0	0	0.0151946
9632	312.085	1	0	1	0	0	0	0.0152463
9634	312.119	1	0	1	0	0	0	0.0152578
9636	312.152	1	0	1	0	0	0	0.0152399
9638	312.185	1	0	1	0	0	0	0.0152115
9640	312.219	1	0	1	0	0	0	0.0151898
9642	312.252	1	0	1	0	0	0	0.0153235
9644	312.285	1	0	1	0	0	0	0.0152947
9646	312.319	1	0	1	0	0	0	0.0152243
9648	312.352	1	0	1	0	0	0	0.0151959
9650	312.385	1	0	1	0	0	0	0.0151275
9652	312.419	1	0	1	0	0	0	0.0151905
9654	312.452	1	0	1	0	0	0	0.0151248
9656	312.485	1	0	1	0	0	0	0.0150054
9658	312.519	1	0	1	0	0	0	0.0150565
9660	312.552	1	0	1	0	0	0	0.0151333
9662	312.585	1	0	1	0	0	0	0.0151746
9664	312.619	1	0	1	0	0	0	0.0151289
9666	312.652	1	0	1	0	0	0	0.0151455
9668	312.685	1	0	1	0	0	0	0.0152122
9670	312.719	1	0	1	0	0	0	0.015202
9672	312.752	1	0	1	0	0	0	0.015204
9674	312.785	1	0	1	0	0	0	0.015135
9676	312.819	1	0	1	0	0	0	0.0150741
9678	312.852	1	0	1	0	0	0	0.0151445
9680	312.885	1	0	1	0	0	0	0.0152426
9682	312.919	1	0	1	0	0	0	0.015445
9684	312.952	1	0	1	0	0	0	0.0154666
9686	312.985	1	0	1	0	0	0	0.0155475
9688	313.019	1	0	1	0	0	0	0.0156027
9690	313.052	1	0	1	0	0	0	0.0156335
9692	313.085	1	0	1	0	0	0	0.0156477
9694	313.119	1	0	1	0	0	0	0.015559
9696	313.152	1	0	1	0	0	0	0.0155157
9698	313.185	1	0	1	0	0	0	0.0155509
9700	313.219	1	0	1	0	0	0	0.0154971
9702	313.252	1	0	1	0	0	0	0.0154988
9704	313.285	1	0	1	0	0	0	0.0154226
9706	313.319	1	0	1	0	0	0	0.0153702
9708	313.352	1	0	1	0	0	0	0.0154034
9710	313.385	1	0	1	0	0	0	0.0154558
9712	313.419	1	0	1	0	0	0	0.015534
9714	313.452	1	0	1	0	0	0	0.0154856
9716	313.485	1	0	1	0	0	0	0.0154409
9718	313.519	1	0	1	0	0	0	0.0155211
9720	313.552	1	0	1	0	0	0	0.0155262
9722	313.585	1	0	1	0	0	0	0.0156328
9724	313.619	1	0	1	0	0	0	0.0156369
9726	313.652	1	0	1	0	0	0	0.0156281
9728	313.685	1	0	1	0	0	0	0.0156666
9730	313.719	1	0	1	0	0	0	0.0155056
9732	313.752	1	0	1	0	0	0	0.0154585
9734	313.785	1	0	1	0	0	0	0.0155218
9736	313.819	1	0	1	0	0	0	0.0154907
9738	313.852	1	0	1	0	0	0	0.0154768
9740	313.885	1	0	1	0	0	0	0.0153001
9742	313.919	1	0	1	0	0	0	0.0152913
9744	313.952	1	0	1	0	0	0	0.0153414
9746	313.985	1	0	1	0	0	0	0.0153035
9748	314.019	1	0	1	0	0	0	0.0153181
9750	314.052	1	0	1	0	0	0	0.0153651
9752	314.085	1	0	1	0	0	0	0.015358
9754	314.119	1	0	1	0	0	0	0.0153533
9756	314.152	1	0	1	0	0	0	0.0153069
9758	314.185	1	0	1	0	0	0	0.0153157
9760	314.219	1	0	1	0	0	0	0.0153397
9762	314.252	1	0	1	0	0	0	0.0152385
9764	314.285	1	0	1	0	0	0	0.0151299
9766	314.319	1	0	1	0	0	0	0.0151462
9768	314.352	1	0	1	0	0	0	0.0150335
9770	314.385	1	0	1	0	0	0	0.0149022
9772	314.419	1	0	1	0	0	0	0.0150416
9774	314.452	1	0	1	0	0	0	0.0149651
9776	314.485	1	0	1	0	0	0	0.0149171
9778	314.519	1	0	1	0	0	0	0.0150145
9780	314.552	1	0	1	0	0	0	0.0149702
9782	314.585	1	0	1	0	0	0	0.0149313
9784	314.619	1	0	1	0	0	0	0.0150724
9786	314.652	1	0	1	0	0	0	0.0149709
9788	314.685	1	0	1	0	0	0	0.0149198
9790	314.719	1	0	1	0	0	0	0.0149929
9792	314.752	1	0	1	0	0	0	0.0150226
9794	314.785	1	0	1	0	0	0	0.0149428
9796	314.819	1	0	1	0	0	0	0.0150775
9798	314.852	1	0	1	0	0	0	0.0150697
9800	314.885	1	0	1	0	0	0	0.0150741
9802	314.919	1	0	1	0	0	0	0.0151577
9804	314.952	1	0	1	0	0	0	0.015134
9806	314.985	1	0	1	0	0	0	0.0151445
9808	315.019	1	0	1	0	0	0	0.015133
9810	315.052	1	0	1	0	0	0	0.0152504
9812	315.085	1	0	1	0	0	0	0.0150819
9814	315.119	1	0	1	0	0	0	0.0150006
9816	315.152	1	0	1	0	0	0	0.0151435
9818	315.185	1	0	1	0	0	0	0.01518
9820	315.219	1	0	1	0	0	0	0.0151688
9822	315.252	1	0	1	0	0	0	0.0152054
9824	315.285	1	0	1	0	0	0	0.0152572
9826	315.319	1	0	1	0	0	0	0.0152206
9828	315.352	1	0	1	0	0	0	0.0153715
9830	315.385	1	0	1	0	0	0	0.0154159
9832	315.419	1	0	1	0	0	0	0.0155005
9834	315.452	1	0	1	0	0	0	0.0153577
9836	315.485	1	0	1	0	0	0	0.0153235
9838	315.519	1	0	1	0	0	0	0.0154061
9840	315.552	1	0	1	0	0	0	0.0152968
9842	315.585	1	0	1	0	0	0	0.0152457
9844	315.619	1	0	1	0	0	0	0.0152389
9846	315.652	1	0	1	0	0	0	0.0152609
9848	315.685	1	0	1	0	0	0	0.0150937
9850	315.719	1	0	1	0	0	0	0.0150081
9852	315.752	1	0	1	0	0	0	0.0150599
9854	315.785	1	0	1	0	0	0	0.0151753
9856	315.819	1	0	1	0	0	0	0.0152013
9858	315.852	1	0	1	0	0	0	0.0151814
9860	315.885	1	0	1	0	0	0	0.0153252
9862	315.919	1	0	1	0	0	0	0.0153022
9864	315.952	1	0	1	0	0	0	0.0152423
9866	315.985	1	0	1	0	0	0	0.0153255
9868	316.019	1	0	1	0	0	0	0.0152984
9870	316.052	1	0	1	0	0	0	0.015315
9872	316.085	1	0	1	0	0	0	0.0154663
9874	316.119	1	0	1	0	0	0	0.015244
9876	316.152	1	0	1	0	0	0	0.0153262
9878	316.185	1	0	1	0	0	0	0.0154233
9880	316.219	1	0	1	0	0	0	0.0154007
9882	316.252	1	0	1	0	0	0	0.015332
9884	316.285	1	0	1	0	0	0	0.0153188
9886	316.319	1	0	1	0	0	0	0.0152578
9888	316.352	1	0	1	0	0	0	0.0151797
9890	316.385	1	0	1	0	0	0	0.0152348
9892	316.419	1	0	1	0	0	0	0.0153661
9894	316.452	1	0	1	0	0	0	0.0153915
9896	316.485	1	0	1	0	0	0	0.0154257
9898	316.519	1	0	1	0	0	0	0.0154142
9900	316.552	1	0	1	0	0	0	0.0154108
9902	316.585	1	0	1	0	0	0	0.0154765
9904	316.619	1	0	1	0	0	0	0.0153919
9906	316.652	1	0	1	0	0	0	0.0154145
9908	316.685	1	0	1	0	0	0	0.0154612
9910	316.719	1	0	1	0	0	0	0.0154369
9912	316.752	1	0	1	0	0	0	0.0154443
9914	316.785	1	0	1	0	0	0	0.0154568
9916	316.819	1	0	1	0	0	0	0.0154193
9918	316.852	1	0	1	0	0	0	0.0152829
9920	316.885	1	0	1	0	0	0	0.0153218
9922	316.919	1	0	1	0	0	0	0.0151682
9924	316.952	1	0	1	0	0	0	0.0151032
9926	316.985	1	0	1	0	0	0	0.0150071
9928	317.019	1	0	1	0	0	0	0.0151323
9930	317.052	1	0	1	0	0	0	0.0150084
9932	317.085	1	0	1	0	0	0	0.0149797
9934	317.119	1	0	1	0	0	0	0.0149248
9936	317.152	1	0	1	0	0	0	0.0151157
9938	317.185	1	0	1	0	0	0	0.015247
9940	317.219	1	0	1	0	0	0	0.0153431
9942	317.252	1	0	1	0	0	0	0.0154308
9944	317.285	1	0	1	0	0	0	0.0154562
9946	317.319	1	0	1	0	0	0	0.0154206
9948	317.352	1	0	1	0	0	0	0.015467
9950	317.385	1	0	1	0	0	0	0.0154724
9952	317.419	1	0	1	0	0	0	0.0154981
9954	317.452	1	0	1	0	0	0	0.0153844
9956	317.485	1	0	1	0	0	0	0.0152457
9958	317.519	1	0	1	0	0	0	0.0151611
9960	317.552	1	0	1	0	0	0	0.0152155
9962	317.585	1	0	1	0	0	0	0.0151319
9964	317.619	1	0	1	0	0	0	0.0151756
9966	317.652	1	0	1	0	0	0	0.0152186
9968	317.685	1	0	1	0	0	0	0.0151204
9970	317.719	1	0	1	0	0	0	0.0152453
9972	317.752	1	0	1	0	0	0	0.0152981
9974	317.785	1	0	1	0	0	0	0.0152017
9976	317.819	1	0	1	0	0	0	0.0151871
9978	317.852	1	0	1	0	0	0	0.0151194
9980	317.885	1	0	1	0	0	0	0.0150792
9982	317.919	1	0	1	0	0	0	0.015133
9984	317.952	1	0	1	0	0	0	0.0151929
9986	317.985	1	0	1	0	0	0	0.0152477
9988	318.019	1	0	1	0	0	0	0.0152254
9990	318.052	1	0	1	0	0	0	0.0153861
9992	318.085	1	0	1	0	0	0	0.0154646
9994	318.119	1	0	1	0	0	0	0.0154484
9996	318.152	1	0	1	0	0	0	0.0154788
9998	318.185	1	0	1	0	0	0	0.0153634
10000	318.219	1	0	1	0	0	0	0.0154314
10002	318.252	1	0	1	0	0	0	0.0152832
10004	318.285	1	0	1	0	0	0	0.0151445
10006	318.319	1	0	1	0	0	0	0.0151438
10008	318.352	1	0	1	0	0	0	0.0152247
10010	318.385	1	0	1	0	0	0	0.0153401
10012	318.419	1	0	1	0	0	0	0.0153976
10014	318.452	1	0	1	0	0	0	0.0153949
10016	318.485	1	0	1	0	0	0	0.0153885
10018	318.519	1	0	1	0	0	0	0.0153885
10020	318.552	1	0	1	0	0	0	0.0153485
10022	318.585	1	0	1	0	0	0	0.015205
10024	318.619	1	0	1	0	0	0	0.0150473
10026	318.652	1	0	1	0	0	0	0.014982
10028	318.685	1	0	1	0	0	0	0.014871
10030	318.719	1	0	1	0	0	0	0.0148673
10032	318.752	1	0	1	0	0	0	0.0147986
10034	318.785	1	0	1	0	0	0	0.014759
10036	318.819	1	0	1	0	0	0	0.0147878
10038	318.852	1	0	1	0	0	0	0.0148121
10040	318.885	1	0	1	0	0	0	0.0148209
10042	318.919	1	0	1	0	0	0	0.0148382
10044	318.952	1	0	1	0	0	0	0.0149898
10046	318.985	1	0	1	0	0	0	0.0149925
10048	319.019	1	0	1	0	0	0	0.0149715
10050	319.052	1	0	1	0	0	0	0.0149438
10052	319.085	1	0	1	0	0	0	0.0149692
10054	319.119	1	0	1	0	0	0	0.0149401
10056	319.152	1	0	1	0	0	0	0.0149638
10058	319.185	1	0	1	0	0	0	0.0149837
10060	319.219	1	0	1	0	0	0	0.0150616
10062	319.252	1	0	1	0	0	0	0.0151712
10064	319.285	1	0	1	0	0	0	0.0152105
10066	319.319	1	0	1	0	0	0	0.0151262
10068	319.352	1	0	1	0	0	0	0.0150633
10070	319.385	1	0	1	0	0	0	0.0150071
10072	319.419	1	0	1	0	0	0	0.0150501
10074	319.452	1	0	1	0	0	0	0.0150006
10076	319.485	1	0	1	0	0	0	0.0149698
10078	319.518	1	0	1	0	0	0	0.0149154
10080	319.552	1	0	1	0	0	0	0.0149746
10082	319.585	1	0	1	0	0	0	0.015025
10084	319.618	1	0	1	0	0	0	0.0150287
10086	319.652	1	0	1	0	0	0	0.0149096
10088	319.685	1	0	1	0	0	0	0.0148805
10090	319.718	1	0	1	0	0	0	0.0149617
10092	319.752	1	0	1	0	0	0	0.0149614
10094	319.785	1	0	1	0	0	0	0.0150206
10096	319.818	1	0	1	0	0	0	0.0150565
10098	319.852	1	0	1	0	0	0	0.0150233
10100	319.885	1	0	1	0	0	0	0.0150815
10102	319.918	1	0	1	0	0	0	0.0151539
10104	319.952	1	0	1	0	0	0	0.0149519
10106	319.985	1	0	1	0	0	0	0.0147986
10108	320.018	1	0	1	0	0	0	0.0146778
10110	320.052	1	0	1	0	0	0	0.0147343
10112	320.085	1	0	1	0	0	0	0.0147533
10114	320.118	1	0	1	0	0	0	0.0147935
10116	320.152	1	0	1	0	0	0	0.014911
10118	320.185	1	0	1	0	0	0	0.014894
10120	320.218	1	0	1	0	0	0	0.0148849
10122	320.252	1	0	1	0	0	0	0.0149357
10124	320.285	1	0	1	0	0	0	0.014871
10126	320.318	1	0	1	0	0	0	0.0149055
10128	320.352	1	0	1	0	0	0	0.0149861
10130	320.385	1	0	1	0	0	0	0.0150402
10132	320.418	1	0	1	0	0	0	0.0152243
10134	320.452	1	0	1	0	0	0	0.0152281
10136	320.485	1	0	1	0	0	0	0.0151871
10138	320.518	1	0	1	0	0	0	0.0152605
10140	320.552	1	0	1	0	0	0	0.0153154
10142	320.585	1	0	1	0	0	0	0.0151736
10144	320.618	1	0	1	0	0	0	0.0152179
10146	320.652	1	0	1	0	0	0	0.0150463
10148	320.685	1	0	1	0	0	0	0.0150453
10150	320.718	1	0	1	0	0	0	0.0151198
10152	320.752	1	0	1	0	0	0	0.0151766
10154	320.785	1	0	1	0	0	0	0.015224
10156	320.818	1	0	1	0	0	0	0.0152734
10158	320.852	1	0	1	0	0	0	0.0151164
10160	320.885	1	0	1	0	0	0	0.0149858
10162	320.918	1	0	1	0	0	0	0.015269
10164	320.952	1	0	1	0	0	0	0.0153127
10166	320.985	1	0	1	0	0	0	0.0153353
10168	321.018	1	0	1	0	0	0	0.0152358
10170	321.052	1	0	1	0	0	0	0.0149858
10172	321.085	1	0	1	0	0	0	0.0150511
10174	321.118	1	0	1	0	0	0	0.0152964
10176	321.152	1	0	1	0	0	0	0.0154189
10178	321.185	1	0	1	0	0	0	0.0155127
10180	321.218	1	0	1	0	0	0	0.0154267
10182	321.252	1	0	1	0	0	0	0.0152795
10184	321.285	1	0	1	0	0	0	0.01518
10186	321.318	1	0	1	0	0	0	0.0150318
10188	321.352	1	0	1	0	0	0	0.0152514
10190	321.385	1	0	1	0	0	0	0.0152281
10192	321.418	1	0	1	0	0	0	0.0153208
10194	321.452	1	0	1	0	0	0	0.0153353
10196	321.485	1	0	1	0	0	0	0.0151445
10198	321.518	1	0	1	0	0	0	0.0151062
10200	321.552	1	0	1	0	0	0	0.0152196
10202	321.585	1	0	1	0	0	0	0.0152155
10204	321.618	1	0	1	0	0	0	0.015204
10206	321.652	1	0	1	0	0	0	0.0152169
10208	321.685	1	0	1	0	0	0	0.0152135
10210	321.718	1	0	1	0	0	0	0.0153157
10212	321.752	1	0	1	0	0	0	0.0152866
10214	321.785	1	0	1	0	0	0	0.0153885
10216	321.818	1	0	1	0	0	0	0.0153563
10218	321.852	1	0	1	0	0	0	0.0153431
10220	321.885	1	0	1	0	0	0	0.0152693
10222	321.918	1	0	1	0	0	0	0.0152497
10224	321.952	1	0	1	0	0	0	0.0154254
10226	321.985	1	0	1	0	0	0	0.0153854
10228	322.018	1	0	1	0	0	0	0.0154
10230	322.052	1	0	1	0	0	0	0.0153404
10232	322.085	1	0	1	0	0	0	0.0152507
10234	322.118	1	0	1	0	0	0	0.0153523
10236	322.152	1	0	1	0	0	0	0.0153543
10238	322.185	1	0	1	0	0	0	0.0153127
10240	322.218	1	0	1	0	0	0	0.0152974
10242	322.252	1	0	1	0	0	0	0.0152974
10244	322.285	1	0	1	0	0	0	0.0153864
10246	322.318	1	0	1	0	0	0	0.0152636
10248	322.352	1	0	1	0	0	0	0.0152142
10250	322.385	1	0	1	0	0	0	0.015399
10252	322.418	1	0	1	0	0	0	0.0153164
10254	322.452	1	0	1	0	0	0	0.0153858
10256	322.485	1	0	1	0	0	0	0.0153485
10258	322.518	1	0	1	0	0	0	0.015246
10260	322.552	1	0	1	0	0	0	0.0153215
10262	322.585	1	0	1	0	0	0	0.0153776
10264	322.618	1	0	1	0	0	0	0.015399
10266	322.652	1	0	1	0	0	0	0.0152802
10268	322.685	1	0	1	0	0	0	0.0152863
10270	322.718	1	0	1	0	0	0	0.0152988
10272	322.752	1	0	1	0	0	0	0.0151966
10274	322.785	1	0	1	0	0	0	0.0153546
10276	322.818	1	0	1	0	0	0	0.0153546
10278	322.852	1	0	1	0	0	0	0.015249
10280	322.885	1	0	1	0	0	0	0.0153567
10282	322.918	1	0	1	0	0	0	0.0152798
10284	322.952	1	0	1	0	0	0	0.0152646
10286	322.985	1	0	1	0	0	0	0.0154084
10288	323.018	1	0	1	0	0	0	0.0153144
10290	323.052	1	0	1	0	0	0	0.0153093
10292	323.085	1	0	1	0	0	0	0.0152693
10294	323.118	1	0	1	0	0	0	0.0152886
10296	323.152	1	0	1	0	0	0	0.0152599
10298	323.185	1	0	1	0	0	0	0.0151979
10300	323.218	1	0	1	0	0	0	0.015334
10302	323.252	1	0	1	0	0	0	0.0153841
10304	323.285	1	0	1	0	0	0	0.0153594
10306	323.318	1	0	1	0	0	0	0.0153746
10308	323.352	1	0	1	0	0	0	0.0154155
10310	323.385	1	0	1	0	0	0	0.0152602
10312	323.418	1	0	1	0	0	0	0.0153137
10314	323.452	1	0	1	0	0	0	0.0152913
10316	323.485	1	0	1	0	0	0	0.0153357
10318	323.518	1	0	1	0	0	0	0.0153127
10320	323.552	1	0	1	0	0	0	0.0153211
10322	323.585	1	0	1	0	0	0	0.0152863
10324	323.618	1	0	1	0	0	0	0.015382
10326	323.652	1	0	1	0	0	0	0.0153404
10328	323.685	1	0	1	0	0	0	0.0152548
10330	323.718	1	0	1	0	0	0	0.0153343
10332	323.752	1	0	1	0	0	0	0.0151529
10334	323.785	1	0	1	0	0	0	0.0152805
10336	323.818	1	0	1	0	0	0	0.0153462
10338	323.852	1	0	1	0	0	0	0.0153759
10340	323.885	1	0	1	0	0	0	0.015292
10342	323.918	1	0	1	0	0	0	0.0152413
10344	323.952	1	0	1	0	0	0	0.0151502
10346	323.985	1	0	1	0	0	0	0.0150294
10348	324.018	1	0	1	0	0	0	0.0148876
10350	324.052	1	0	1	0	0	0	0.0148731
10352	324.085	1	0	1	0	0	0	0.0150149
10354	324.118	1	0	1	0	0	0	0.0152765
10356	324.152	1	0	1	0	0	0	0.0152179
10358	324.185	1	0	1	0	0	0	0.0149147
10360	324.218	1	0	1	0	0	0	0.0146081
10362	324.252	1	0	1	0	0	0	0.0146013
10364	324.285	1	0	1	0	0	0	0.0145367
10366	324.318	1	0	1	0	0	0	0.0145177
10368	324.352	1	0	1	0	0	0	0.0144314
10370	324.385	1	0	1	0	0	0	0.0145143
10372	324.418	1	0	1	0	0	0	0.0147441
10374	324.452	1	0	1	0	0	0	0.0145732
10376	324.485	1	0	1	0	0	0	0.0145279
10378	324.518	1	0	1	0	0	0	0.0143654
10380	324.552	1	0	1	0	0	0	0.0143289
10382	324.585	1	0	1	0	0	0	0.0145042
10384	324.618	1	0	1	0	0	0	0.0144917
10386	324.652	1	0	1	0	0	0	0.0145049
10388	324.685	1	0	1	0	0	0	0.0146399
10390	324.718	1	0	1	0	0	0	0.0146165
10392	324.752	1	0	1	0	0	0	0.0144091
10394	324.785	1	0	1	0	0	0	0.0144561
10396	324.818	1	0	1	0	0	0	0.0143993
10398	324.852	1	0	1	0	0	0	0.0143627
10400	324.885	1	0	1	0	0	0	0.0145431
10402	324.918	1	0	1	0	0	0	0.0143489
10404	324.952	1	0	1	0	0	0	0.0144088
10406	324.985	1	0	1	0	0	0	0.0143928
10408	325.018	1	0	1	0	0	0	0.0143235
10410	325.052	1	0	1	0	0	0	0.0147516
10412	325.085	1	0	1	0	0	0	0.0148812
10414	325.118	1	0	1	0	0	0	0.0146094
10416	325.152	1	0	1	0	0	0	0.0146304
10418	325.185	1	0	1	0	0	0	0.0146609
10420	325.218	1	0	1	0	0	0	0.0143492
10422	325.252	1	0	1	0	0	0	0.0147214
10424	325.285	1	0	1	0	0	0	0.0150081
10426	325.318	1	0	1	0	0	0	0.0151387
10428	325.352	1	0	1	0	0	0	0.0147028
10430	325.385	1	0	1	0	0	0	0.0146033
10432	325.418	1	0	1	0	0	0	0.0143238
10434	325.452	1	0	1	0	0	0	0.014404
10436	325.485	1	0	1	0	0	0	0.0146067
10438	325.518	1	0	1	0	0	0	0.0147715
10440	325.552	1	0	1	0	0	0	0.0148768
10442	325.585	1	0	1	0	0	0	0.0152277
10444	325.618	1	0	1	0	0	0	0.0153191
10446	325.652	1	0	1	0	0	0	0.0152321
10448	325.685	1	0	1	0	0	0	0.0150771
10450	325.718	1	0	1	0	0	0	0.0151448
10452	325.752	1	0	1	0	0	0	0.0151864
10454	325.785	1	0	1	0	0	0	0.015137
10456	325.818	1	0	1	0	0	0	0.0150111
10458	325.852	1	0	1	0	0	0	0.0151966
10460	325.885	1	0	1	0	0	0	0.0149411
10462	325.918	1	0	1	0	0	0	0.0149766
10464	325.952	1	0	1	0	0	0	0.0150751
10466	325.985	1	0	1	0	0	0	0.0151184
10468	326.018	1	0	1	0	0	0	0.0150561
10470	326.052	1	0	1	0	0	0	0.014979
10472	326.085	1	0	1	0	0	0	0.0149506
10474	326.118	1	0	1	0	0	0	0.0149174
10476	326.152	1	0	1	0	0	0	0.0148257
10478	326.185	1	0	1	0	0	0	0.014978
10480	326.218	1	0	1	0	0	0	0.015046
10482	326.252	1	0	1	0	0	0	0.0149025
10484	326.285	1	0	1	0	0	0	0.014956
10486	326.318	1	0	1	0	0	0	0.0150006
10488	326.352	1	0	1	0	0	0	0.0149191
10490	326.385	1	0	1	0	0	0	0.0149154
10492	326.418	1	0	1	0	0	0	0.0151509
10494	326.452	1	0	1	0	0	0	0.0151743
10496	326.485	1	0	1	0	0	0	0.0153506
10498	326.518	1	0	1	0	0	0	0.0152937
10500	326.552	1	0	1	0	0	0	0.0152017
10502	326.585	1	0	1	0	0	0	0.0150697
10504	326.618	1	0	1	0	0	0	0.015027
10506	326.652	1	0	1	0	0	0	0.0149323
10508	326.685	1	0	1	0	0	0	0.0148375
10510	326.718	1	0	1	0	0	0	0.0150061
10512	326.752	1	0	1	0	0	0	0.015221
10514	326.785	1	0	1	0	0	0	0.0152917
10516	326.818	1	0	1	0	0	0	0.0152873
10518	326.852	1	0	1	0	0	0	0.0153228
10520	326.885	1	0	1	0	0	0	0.0152683
10522	326.918	1	0	1	0	0	0	0.0152853
10524	326.952	1	0	1	0	0	0	0.0153414
10526	326.985	1	0	1	0	0	0	0.0152761
10528	327.018	1	0	1	0	0	0	0.0152348
10530	327.052	1	0	1	0	0	0	0.0152568
10532	327.085	1	0	1	0	0	0	0.0152589
10534	327.118	1	0	1	0	0	0	0.0150199
10536	327.152	1	0	1	0	0	0	0.0150954
10538	327.185	1	0	1	0	0	0	0.0151363
10540	327.218	1	0	1	0	0	0	0.0151316
10542	327.252	1	0	1	0	0	0	0.0151803
10544	327.285	1	0	1	0	0	0	0.0151083
10546	327.318	1	0	1	0	0	0	0.014913
10548	327.352	1	0	1	0	0	0	0.0150287
10550	327.385	1	0	1	0	0	0	0.0150379
10552	327.418	1	0	1	0	0	0	0.0151052
10554	327.452	1	0	1	0	0	0	0.015293
10556	327.485	1	0	1	0	0	0	0.0153333
10558	327.518	1	0	1	0	0	0	0.0154111
10560	327.552	1	0	1	0	0	0	0.015471
10562	327.585	1	0	1	0	0	0	0.015424
10564	327.618	1	0	1	0	0	0	0.0154088
10566	327.652	1	0	1	0	0	0	0.0153729
10568	327.685	1	0	1	0	0	0	0.0154088
10570	327.718	1	0	1	0	0	0	0.0154416
10572	327.752	1	0	1	0	0	0	0.0154744
10574	327.785	1	0	1	0	0	0	0.0154727
10576	327.818	1	0	1	0	0	0	0.0155191
10578	327.852	1	0	1	0	0	0	0.0154487
10580	327.885	1	0	1	0	0	0	0.0152805
10582	327.918	1	0	1	0	0	0	0.0151847
10584	327.952	1	0	1	0	0	0	0.0152169
10586	327.985	1	0	1	0	0	0	0.0149753
10588	328.018	1	0	1	0	0	0	0.0150369
10590	328.051	1	0	1	0	0	0	0.0151147
10592	328.085	1	0	1	0	0	0	0.0148863
10594	328.118	1	0	1	0	0	0	0.014955
10596	328.151	1	0	1	0	0	0	0.0150209
10598	328.185	1	0	1	0	0	0	0.0149732
10600	328.218	1	0	1	0	0	0	0.0150138
10602	328.251	1	0	1	0	0	0	0.0150511
10604	328.285	1	0	1	0	0	0	0.0151208
10606	328.318	1	0	1	0	0	0	0.0151969
10608	328.351	1	0	1	0	0	0	0.0152054
10610	328.385	1	0	1	0	0	0	0.0149847
10612	328.418	1	0	1	0	0	0	0.0148961
10614	328.451	1	0	1	0	0	0	0.0150209
10616	328.485	1	0	1	0	0	0	0.0149116
10618	328.518	1	0	1	0	0	0	0.0147171
10620	328.551	1	0	1	0	0	0	0.0147756
10622	328.585	1	0	1	0	0	0	0.014846
10624	328.618	1	0	1	0	0	0	0.0147333
10626	328.651	1	0	1	0	0	0	0.0145881
10628	328.685	1	0	1	0	0	0	0.0147499
10630	328.718	1	0	1	0	0	0	0.0148074
10632	328.751	1	0	1	0	0	0	0.0148267
10634	328.785	1	0	1	0	0	0	0.0148301
10636	328.818	1	0	1	0	0	0	0.0148121
10638	328.851	1	0	1	0	0	0	0.0148866
10640	328.885	1	0	1	0	0	0	0.0149732
10642	328.918	1	0	1	0	0	0	0.0149326
10644	328.951	1	0	1	0	0	0	0.0149319
10646	328.985	1	0	1	0	0	0	0.0149563
10648	329.018	1	0	1	0	0	0	0.0147793
10650	329.051	1	0	1	0	0	0	0.0148771
10652	329.085	1	0	1	0	0	0	0.0150646
10654	329.118	1	0	1	0	0	0	0.0150152
10656	329.151	1	0	1	0	0	0	0.0149536
10658	329.185	1	0	1	0	0	0	0.0150199
10660	329.218	1	0	1	0	0	0	0.0151753
10662	329.251	1	0	1	0	0	0	0.0152365
10664	329.285	1	0	1	0	0	0	0.0153323
10666	329.318	1	0	1	0	0	0	0.0153837
10668	329.351	1	0	1	0	0	0	0.0153898
10670	329.385	1	0	1	0	0	0	0.0154792
10672	329.418	1	0	1	0	0	0	0.0154213
10674	329.451	1	0	1	0	0	0	0.0154477
10676	329.485	1	0	1	0	0	0	0.0155414
10678	329.518	1	0	1	0	0	0	0.0155181
10680	329.551	1	0	1	0	0	0	0.0155069
10682	329.585	1	0	1	0	0	0	0.0154122
10684	329.618	1	0	1	0	0	0	0.0153272
10686	329.651	1	0	1	0	0	0	0.0152829
10688	329.685	1	0	1	0	0	0	0.0152348
10690	329.718	1	0	1	0	0	0	0.0150984
10692	329.751	1	0	1	0	0	0	0.0151242
10694	329.785	1	0	1	0	0	0	0.0151248
10696	329.818	1	0	1	0	0	0	0.0150693
10698	329.851	1	0	1	0	0	0	0.0150924
10700	329.885	1	0	1	0	0	0	0.0151319
10702	329.918	1	0	1	0	0	0	0.0150822
10704	329.951	1	0	1	0	0	0	0.0150416
10706	329.985	1	0	1	0	0	0	0.015023
10708	330.018	1	0	1	0	0	0	0.0150649
10710	330.051	1	0	1	0	0	0	0.0151269
10712	330.085	1	0	1	0	0	0	0.015115
10714	330.118	1	0	1	0	0	0	0.0150609
10716	330.151	1	0	1	0	0	0	0.0151553
10718	330.185	1	0	1	0	0	0	0.0151072
10720	330.218	1	0	1	0	0	0	0.0151181
10722	330.251	1	0	1	0	0	0	0.0152348
10724	330.285	1	0	1	0	0	0	0.0153435
10726	330.318	1	0	1	0	0	0	0.0154988
10728	330.351	1	0	1	0	0	0	0.0155996
10730	330.385	1	0	1	0	0	0	0.015558
10732	330.418	1	0	1	0	0	0	0.0154842
10734	330.451	1	0	1	0	0	0	0.0154781
10736	330.485	1	0	1	0	0	0	0.0155005
10738	330.518	1	0	1	0	0	0	0.015515
10740	330.551	1	0	1	0	0	0	0.0155005
10742	330.585	1	0	1	0	0	0	0.0154616
10744	330.618	1	0	1	0	0	0	0.0154443
10746	330.651	1	0	1	0	0	0	0.0154781
10748	330.685	1	0	1	0	0	0	0.0154199
10750	330.718	1	0	1	0	0	0	0.0154166
10752	330.751	1	0	1	0	0	0	0.0154118
10754	330.785	1	0	1	0	0	0	0.0153651
10756	330.818	1	0	1	0	0	0	0.0153834
10758	330.851	1	0	1	0	0	0	0.015377
10760	330.885	1	0	1	0	0	0	0.0152517
10762	330.918	1	0	1	0	0	0	0.0151776
10764	330.951	1	0	1	0	0	0	0.0152673
10766	330.985	1	0	1	0	0	0	0.0151739
10768	331.018	1	0	1	0	0	0	0.0150866
10770	331.051	1	0	1	0	0	0	0.0150666
10772	331.085	1	0	1	0	0	0	0.0151455
10774	331.118	1	0	1	0	0	0	0.0150893
10776	331.151	1	0	1	0	0	0	0.0150676
10778	331.185	1	0	1	0	0	0	0.0151949
10780	331.218	1	0	1	0	0	0	0.0151814
10782	331.251	1	0	1	0	0	0	0.0152362
10784	331.285	1	0	1	0	0	0	0.0152964
10786	331.318	1	0	1	0	0	0	0.0153567
10788	331.351	1	0	1	0	0	0	0.015378
10790	331.385	1	0	1	0	0	0	0.0153864
10792	331.418	1	0	1	0	0	0	0.0153919
10794	331.451	1	0	1	0	0	0	0.0152866
10796	331.485	1	0	1	0	0	0	0.0152511
10798	331.518	1	0	1	0	0	0	0.0151269
10800	331.551	1	0	1	0	0	0	0.0150443
10802	331.585	1	0	1	0	0	0	0.0148886
10804	331.618	1	0	1	0	0	0	0.0147099
10806	331.651	1	0	1	0	0	0	0.0146226
10808	331.685	1	0	1	0	0	0	0.0146426
10810	331.718	1	0	1	0	0	0	0.0146693
10812	331.751	1	0	1	0	0	0	0.0147888
10814	331.785	1	0	1	0	0	0	0.014671
10816	331.818	1	0	1	0	0	0	0.0146365
10818	331.851	1	0	1	0	0	0	0.0145573
10820	331.885	1	0	1	0	0	0	0.0146189
10822	331.918	1	0	1	0	0	0	0.0146077
10824	331.951	1	0	1	0	0	0	0.0146412
10826	331.985	1	0	1	0	0	0	0.014756
10828	332.018	1	0	1	0	0	0	0.0149942
10830	332.051	1	0	1	0	0	0	0.014868
10832	332.085	1	0	1	0	0	0	0.0148646
10834	332.118	1	0	1	0	0	0	0.0150006
10836	332.151	1	0	1	0	0	0	0.0148849
10838	332.185	1	0	1	0	0	0	0.0147857
10840	332.218	1	0	1	0	0	0	0.0148077
10842	332.251	1	0	1	0	0	0	0.0149668
10844	332.285	1	0	1	0	0	0	0.01489
10846	332.318	1	0	1	0	0	0	0.0148199
10848	332.351	1	0	1	0	0	0	0.0148281
10850	332.385	1	0	1	0	0	0	0.0145404
10852	332.418	1	0	1	0	0	0	0.0144213
10854	332.451	1	0	1	0	0	0	0.0145022
10856	332.485	1	0	1	0	0	0	0.0144294
10858	332.518	1	0	1	0	0	0	0.0144835
10860	332.551	1	0	1	0	0	0	0.0148108
10862	332.585	1	0	1	0	0	0	0.014826
10864	332.618	1	0	1	0	0	0	0.0148981
10866	332.651	1	0	1	0	0	0	0.0149306
10868	332.685	1	0	1	0	0	0	0.0149895
10870	332.718	1	0	1	0	0	0	0.0151252
10872	332.751	1	0	1	0	0	0	0.0150027
10874	332.785	1	0	1	0	0	0	0.0147756
10876	332.818	1	0	1	0	0	0	0.0146863
10878	332.851	1	0	1	0	0	0	0.0145763
10880	332.885	1	0	1	0	0	0	0.0144883
10882	332.918	1	0	1	0	0	0	0.0145499
10884	332.951	1	0	1	0	0	0	0.0145847
10886	332.985	1	0	1	0	0	0	0.0144673
10888	333.018	1	0	1	0	0	0	0.0145516
10890	333.051	1	0	1	0	0	0	0.0148311
10892	333.085	1	0	1	0	0	0	0.0148291
10894	333.118	1	0	1	0	0	0	0.0148538
10896	333.151	1	0	1	0	0	0	0.0149644
10898	333.185	1	0	1	0	0	0	0.0150355
10900	333.218	1	0	1	0	0	0	0.015001
10902	333.251	1	0	1	0	0	0	0.0150399
10904	333.285	1	0	1	0	0	0	0.0149543
10906	333.318	1	0	1	0	0	0	0.0148558
10908	333.351	1	0	1	0	0	0	0.0150362
10910	333.385	1	0	1	0	0	0	0.0149462
10912	333.418	1	0	1	0	0	0	0.0150463
10914	333.451	1	0	1	0	0	0	0.0150849
10916	333.485	1	0	1	0	0	0	0.0150673
10918	333.518	1	0	1	0	0	0	0.0152078
10920	333.551	1	0	1	0	0	0	0.015204
10922	333.585	1	0	1	0	0	0	0.015182
10924	333.618	1	0	1	0	0	0	0.0151357
10926	333.651	1	0	1	0	0	0	0.0149732
10928	333.685	1	0	1	0	0	0	0.0150294
10930	333.718	1	0	1	0	0	0	0.0152761
10932	333.751	1	0	1	0	0	0	0.0152825
10934	333.785	1	0	1	0	0	0	0.0152088
10936	333.818	1	0	1	0	0	0	0.0152409
10938	333.851	1	0	1	0	0	0	0.0152088
10940	333.885	1	0	1	0	0	0	0.0151807
10942	333.918	1	0	1	0	0	0	0.0152822
10944	333.951	1	0	1	0	0	0	0.0152825
10946	333.985	1	0	1	0	0	0	0.0152971
10948	334.018	1	0	1	0	0	0	0.0151712
10950	334.051	1	0	1	0	0	0	0.0151573
10952	334.085	1	0	1	0	0	0	0.0152876
10954	334.118	1	0	1	0	0	0	0.0153695
10956	334.151	1	0	1	0	0	0	0.0153005
10958	334.185	1	0	1	0	0	0	0.0153242
10960	334.218	1	0	1	0	0	0	0.0149824
10962	334.251	1	0	1	0	0	0	0.0150094
10964	334.285	1	0	1	0	0	0	0.0151451
10966	334.318	1	0	1	0	0	0	0.0151929
10968	334.351	1	0	1	0	0	0	0.0150189
10970	334.385	1	0	1	0	0	0	0.0150169
10972	334.418	1	0	1	0	0	0	0.0151083
10974	334.451	1	0	1	0	0	0	0.0150409
10976	334.485	1	0	1	0	0	0	0.0151164
10978	334.518	1	0	1	0	0	0	0.0149492
10980	334.551	1	0	1	0	0	0	0.0149089
10982	334.585	1	0	1	0	0	0	0.0149377
10984	334.618	1	0	1	0	0	0	0.0150196
10986	334.651	1	0	1	0	0	0	0.0150555
10988	334.685	1	0	1	0	0	0	0.0148165
10990	334.718	1	0	1	0	0	0	0.0146883
10992	334.751	1	0	1	0	0	0	0.0144876
10994	334.785	1	0	1	0	0	0	0.0144524
10996	334.818	1	0	1	0	0	0	0.01456
10998	334.851	1	0	1	0	0	0	0.0146138
11000	334.885	1	0	1	0	0	0	0.0146389
11002	334.918	1	0	1	0	0	0	0.0147424
11004	334.951	1	0	1	0	0	0	0.014915
11006	334.985	1	0	1	0	0	0	0.0146311
11008	335.018	1	0	1	0	0	0	0.0145126
11010	335.051	1	0	1	0	0	0	0.0145005
11012	335.085	1	0	1	0	0	0	0.0145709
11014	335.118	1	0	1	0	0	0	0.0147715
11016	335.151	1	0	1	0	0	0	0.0148355
11018	335.185	1	0	1	0	0	0	0.01478
11020	335.218	1	0	1	0	0	0	0.0151885
11022	335.251	1	0	1	0	0	0	0.0152311
11024	335.285	1	0	1	0	0	0	0.015269
11026	335.318	1	0	1	0	0	0	0.0152893
11028	335.351	1	0	1	0	0	0	0.0152362
11030	335.385	1	0	1	0	0	0	0.0152863
11032	335.418	1	0	1	0	0	0	0.0153452
11034	335.451	1	0	1	0	0	0	0.015338
11036	335.485	1	0	1	0	0	0	0.0154294
11038	335.518	1	0	1	0	0	0	0.0154981
11040	335.551	1	0	1	0	0	0	0.0154961
11042	335.585	1	0	1	0	0	0	0.0154758
11044	335.618	1	0	1	0	0	0	0.0154937
11046	335.651	1	0	1	0	0	0	0.0154761
11048	335.685	1	0	1	0	0	0	0.015447
11050	335.718	1	0	1	0	0	0	0.015537
11052	335.751	1	0	1	0	0	0	0.0155245
11054	335.785	1	0	1	0	0	0	0.0155073
11056	335.818	1	0	1	0	0	0	0.0155147
11058	335.851	1	0	1	0	0	0	0.0155753
11060	335.885	1	0	1	0	0	0	0.0155868
11062	335.918	1	0	1	0	0	0	0.0155414
11064	335.951	1	0	1	0	0	0	0.0153952
11066	335.985	1	0	1	0	0	0	0.0152589
11068	336.018	1	0	1	0	0	0	0.0152727
11070	336.051	1	0	1	0	0	0	0.0153072
11072	336.085	1	0	1	0	0	0	0.0154714
11074	336.118	1	0	1	0	0	0	0.0154382
11076	336.151	1	0	1	0	0	0	0.0153631
11078	336.185	1	0	1	0	0	0	0.0153959
11080	336.218	1	0	1	0	0	0	0.0154876
11082	336.251	1	0	1	0	0	0	0.015426
11084	336.285	1	0	1	0	0	0	0.0154633
11086	336.318	1	0	1	0	0	0	0.015535
11088	336.351	1	0	1	0	0	0	0.0155221
11090	336.385	1	0	1	0	0	0	0.0155299
11092	336.418	1	0	1	0	0	0	0.0154836
11094	336.451	1	0	1	0	0	0	0.0154281
11096	336.485	1	0	1	0	0	0	0.0154088
11098	336.518	1	0	1	0	0	0	0.0153573
11100	336.551	1	0	1	0	0	0	0.0153018
11102	336.584	1	0	1	0	0	0	0.015449
11104	336.618	1	0	1	0	0	0	0.0155106
11106	336.651	1	0	1	0	0	0	0.0154602
11108	336.684	1	0	1	0	0	0	0.0154707
11110	336.718	1	0	1	0	0	0	0.0154832
11112	336.751	1	0	1	0	0	0	0.0155611
11114	336.784	1	0	1	0	0	0	0.0155228
11116	336.818	1	0	1	0	0	0	0.0154565
11118	336.851	1	0	1	0	0	0	0.0154399
11120	336.884	1	0	1	0	0	0	0.0155093
[truncated: 34,167 more rows]

## Sheet: Mouse_3_470_Signal
FrameCounter	Timestamp	LedState	Stimulation	Output0	Output1	Input0	Input1	Region0G
7125	270.304	2	0	1	0	0	0	0.0240316
7127	270.337	2	0	1	0	0	0	0.0239792
7129	270.37	2	0	1	0	0	0	0.0238526
7131	270.404	2	0	1	0	0	0	0.0239409
7133	270.437	2	0	1	0	0	0	0.0240516
7135	270.47	2	0	1	0	0	0	0.0239602
7137	270.504	2	0	1	0	0	0	0.0240377
7139	270.537	2	0	1	0	0	0	0.0240293
7141	270.57	2	0	1	0	0	0	0.024099
7143	270.604	2	0	1	0	0	0	0.024235
7145	270.637	2	0	1	0	0	0	0.0242577
7147	270.67	2	0	1	0	0	0	0.0242465
7149	270.704	2	0	1	0	0	0	0.0244502
7151	270.737	2	0	1	0	0	0	0.0242692
7153	270.77	2	0	1	0	0	0	0.0241345
7155	270.804	2	0	1	0	0	0	0.0242127
7157	270.837	2	0	1	0	0	0	0.0241196
7159	270.87	2	0	1	0	0	0	0.0239474
7161	270.904	2	0	1	0	0	0	0.0240377
7163	270.937	2	0	1	0	0	0	0.0239656
7165	270.97	2	0	1	0	0	0	0.0238485
7167	271.004	2	0	1	0	0	0	0.0238336
7169	271.037	2	0	1	0	0	0	0.023793
7171	271.07	2	0	1	0	0	0	0.0236634
7173	271.104	2	0	1	0	0	0	0.0236634
7175	271.137	2	0	1	0	0	0	0.0238323
7177	271.17	2	0	1	0	0	0	0.0237876
7179	271.204	2	0	1	0	0	0	0.023769
7181	271.237	2	0	1	0	0	0	0.0238123
7183	271.27	2	0	1	0	0	0	0.0236922
7185	271.304	2	0	1	0	0	0	0.0236489
7187	271.337	2	0	1	0	0	0	0.0236475
7189	271.37	2	0	1	0	0	0	0.0237589
7191	271.404	2	0	1	0	0	0	0.0236803
7193	271.437	2	0	1	0	0	0	0.0235771
7195	271.47	2	0	1	0	0	0	0.0235565
7197	271.504	2	0	1	0	0	0	0.0235839
7199	271.537	2	0	1	0	0	0	0.0234918
7201	271.57	2	0	1	0	0	0	0.0235619
7203	271.604	2	0	1	0	0	0	0.0234864
7205	271.637	2	0	1	0	0	0	0.0232198
7207	271.67	2	0	1	0	0	0	0.0234066
7209	271.704	2	0	1	0	0	0	0.0234187
7211	271.737	2	0	1	0	0	0	0.0232702
7213	271.77	2	0	1	0	0	0	0.0232817
7215	271.804	2	0	1	0	0	0	0.0235172
7217	271.837	2	0	1	0	0	0	0.0234052
7219	271.87	2	0	1	0	0	0	0.0235155
7221	271.904	2	0	1	0	0	0	0.0235896
7223	271.937	2	0	1	0	0	0	0.0236401
7225	271.97	2	0	1	0	0	0	0.0238638
7227	272.004	2	0	1	0	0	0	0.0239338
7229	272.037	2	0	1	0	0	0	0.0237954
7231	272.07	2	0	1	0	0	0	0.0236404
7233	272.104	2	0	1	0	0	0	0.0235947
7235	272.137	2	0	1	0	0	0	0.0236631
7237	272.17	2	0	1	0	0	0	0.0236817
7239	272.204	2	0	1	0	0	0	0.0235321
7241	272.237	2	0	1	0	0	0	0.0234499
7243	272.27	2	0	1	0	0	0	0.0235501
7245	272.304	2	0	1	0	0	0	0.0236062
7247	272.337	2	0	1	0	0	0	0.0236715
7249	272.37	2	0	1	0	0	0	0.0238418
7251	272.404	2	0	1	0	0	0	0.0237859
7253	272.437	2	0	1	0	0	0	0.0236661
7255	272.47	2	0	1	0	0	0	0.0236563
7257	272.504	2	0	1	0	0	0	0.0235372
7259	272.537	2	0	1	0	0	0	0.0235145
7261	272.57	2	0	1	0	0	0	0.0236144
7263	272.604	2	0	1	0	0	0	0.0235771
7265	272.637	2	0	1	0	0	0	0.0235118
7267	272.67	2	0	1	0	0	0	0.0235876
7269	272.704	2	0	1	0	0	0	0.0234908
7271	272.737	2	0	1	0	0	0	0.0234177
7273	272.77	2	0	1	0	0	0	0.0235118
7275	272.804	2	0	1	0	0	0	0.0235155
7277	272.837	2	0	1	0	0	0	0.0234479
7279	272.87	2	0	1	0	0	0	0.0234451
7281	272.904	2	0	1	0	0	0	0.0233429
7283	272.937	2	0	1	0	0	0	0.023194
7285	272.97	2	0	1	0	0	0	0.0232367
7287	273.004	2	0	1	0	0	0	0.0234042
7289	273.037	2	0	1	0	0	0	0.0234208
7291	273.07	2	0	1	0	0	0	0.0232445
7293	273.104	2	0	1	0	0	0	0.0232888
7295	273.137	2	0	1	0	0	0	0.0233
7297	273.17	2	0	1	0	0	0	0.0230956
7299	273.204	2	0	1	0	0	0	0.0230698
7301	273.237	2	0	1	0	0	0	0.0231196
7303	273.27	2	0	1	0	0	0	0.023215
7305	273.304	2	0	1	0	0	0	0.0234942
7307	273.337	2	0	1	0	0	0	0.0234039
7309	273.37	2	0	1	0	0	0	0.0233771
7311	273.404	2	0	1	0	0	0	0.0238113
7313	273.437	2	0	1	0	0	0	0.0239744
7315	273.47	2	0	1	0	0	0	0.0236357
7317	273.504	2	0	1	0	0	0	0.0237849
7319	273.537	2	0	1	0	0	0	0.0234546
7321	273.57	2	0	1	0	0	0	0.0232993
7323	273.604	2	0	1	0	0	0	0.0235111
7325	273.637	2	0	1	0	0	0	0.0236208
7327	273.67	2	0	1	0	0	0	0.0237142
7329	273.704	2	0	1	0	0	0	0.0237565
7331	273.737	2	0	1	0	0	0	0.0236807
7333	273.77	2	0	1	0	0	0	0.0234925
7335	273.804	2	0	1	0	0	0	0.0234661
7337	273.837	2	0	1	0	0	0	0.0234627
7339	273.87	2	0	1	0	0	0	0.0234902
7341	273.904	2	0	1	0	0	0	0.0237037
7343	273.937	2	0	1	0	0	0	0.0235284
7345	273.97	2	0	1	0	0	0	0.0236499
7347	274.004	2	0	1	0	0	0	0.0235934
7349	274.037	2	0	1	0	0	0	0.0234871
7351	274.07	2	0	1	0	0	0	0.0236472
7353	274.104	2	0	1	0	0	0	0.023634
7355	274.137	2	0	1	0	0	0	0.0236489
7357	274.17	2	0	1	0	0	0	0.0236445
7359	274.204	2	0	1	0	0	0	0.0236171
7361	274.237	2	0	1	0	0	0	0.0235846
7363	274.27	2	0	1	0	0	0	0.023748
7365	274.304	2	0	1	0	0	0	0.0238073
7367	274.337	2	0	1	0	0	0	0.0237196
7369	274.37	2	0	1	0	0	0	0.0238651
7371	274.404	2	0	1	0	0	0	0.0238692
7373	274.437	2	0	1	0	0	0	0.0237656
7375	274.47	2	0	1	0	0	0	0.0238255
7377	274.504	2	0	1	0	0	0	0.0237017
7379	274.537	2	0	1	0	0	0	0.0236025
7381	274.57	2	0	1	0	0	0	0.0237785
7383	274.604	2	0	1	0	0	0	0.0237548
7385	274.637	2	0	1	0	0	0	0.023767
7387	274.67	2	0	1	0	0	0	0.0237474
7389	274.704	2	0	1	0	0	0	0.0237243
7391	274.737	2	0	1	0	0	0	0.0237971
7393	274.77	2	0	1	0	0	0	0.0238035
7395	274.804	2	0	1	0	0	0	0.0240086
7397	274.837	2	0	1	0	0	0	0.0239206
7399	274.87	2	0	1	0	0	0	0.0238147
7401	274.904	2	0	1	0	0	0	0.0240167
7403	274.937	2	0	1	0	0	0	0.0239115
7405	274.97	2	0	1	0	0	0	0.0237054
7407	275.004	2	0	1	0	0	0	0.0239125
7409	275.037	2	0	1	0	0	0	0.0240831
7411	275.07	2	0	1	0	0	0	0.0242462
7413	275.104	2	0	1	0	0	0	0.0244262
7415	275.137	2	0	1	0	0	0	0.0243579
7417	275.17	2	0	1	0	0	0	0.0243616
7419	275.204	2	0	1	0	0	0	0.0243128
7421	275.237	2	0	1	0	0	0	0.0241128
7423	275.27	2	0	1	0	0	0	0.0241612
7425	275.304	2	0	1	0	0	0	0.0243653
7427	275.337	2	0	1	0	0	0	0.024235
7429	275.37	2	0	1	0	0	0	0.0241277
7431	275.404	2	0	1	0	0	0	0.0242611
7433	275.437	2	0	1	0	0	0	0.0242306
7435	275.47	2	0	1	0	0	0	0.0239122
7437	275.504	2	0	1	0	0	0	0.0239727
7439	275.537	2	0	1	0	0	0	0.0239277
7441	275.57	2	0	1	0	0	0	0.0238431
7443	275.604	2	0	1	0	0	0	0.0239037
7445	275.637	2	0	1	0	0	0	0.0239308
7447	275.67	2	0	1	0	0	0	0.0239071
7449	275.704	2	0	1	0	0	0	0.0240506
7451	275.737	2	0	1	0	0	0	0.0240103
7453	275.77	2	0	1	0	0	0	0.0239223
7455	275.804	2	0	1	0	0	0	0.0239815
7457	275.837	2	0	1	0	0	0	0.0239206
7459	275.87	2	0	1	0	0	0	0.0239145
7461	275.904	2	0	1	0	0	0	0.0239846
7463	275.937	2	0	1	0	0	0	0.0239402
7465	275.97	2	0	1	0	0	0	0.0238912
7467	276.004	2	0	1	0	0	0	0.02397
7469	276.037	2	0	1	0	0	0	0.0238404
7471	276.07	2	0	1	0	0	0	0.0237524
7473	276.104	2	0	1	0	0	0	0.0238157
7475	276.137	2	0	1	0	0	0	0.0236922
7477	276.17	2	0	1	0	0	0	0.0235859
7479	276.204	2	0	1	0	0	0	0.0237389
7481	276.237	2	0	1	0	0	0	0.0236787
7483	276.27	2	0	1	0	0	0	0.0236973
7485	276.304	2	0	1	0	0	0	0.0238963
7487	276.337	2	0	1	0	0	0	0.0239785
7489	276.37	2	0	1	0	0	0	0.0240749
7491	276.404	2	0	1	0	0	0	0.0242147
7493	276.437	2	0	1	0	0	0	0.0242952
7495	276.47	2	0	1	0	0	0	0.0242871
7497	276.504	2	0	1	0	0	0	0.024324
7499	276.537	2	0	1	0	0	0	0.0244096
7501	276.57	2	0	1	0	0	0	0.0244529
7503	276.604	2	0	1	0	0	0	0.0242929
7505	276.637	2	0	1	0	0	0	0.0243846
7507	276.67	2	0	1	0	0	0	0.0241941
7509	276.704	2	0	1	0	0	0	0.0240512
7511	276.737	2	0	1	0	0	0	0.0242844
7513	276.77	2	0	1	0	0	0	0.0243128
7515	276.804	2	0	1	0	0	0	0.0242181
7517	276.837	2	0	1	0	0	0	0.0242343
7519	276.87	2	0	1	0	0	0	0.0241907
7521	276.904	2	0	1	0	0	0	0.0241233
7523	276.937	2	0	1	0	0	0	0.0242519
7525	276.97	2	0	1	0	0	0	0.0242205
7527	277.004	2	0	1	0	0	0	0.0243034
7529	277.037	2	0	1	0	0	0	0.0246113
7531	277.07	2	0	1	0	0	0	0.0247464
7533	277.104	2	0	1	0	0	0	0.0246472
7535	277.137	2	0	1	0	0	0	0.0247132
7537	277.17	2	0	1	0	0	0	0.0246509
7539	277.204	2	0	1	0	0	0	0.0245169
7541	277.237	2	0	1	0	0	0	0.0246976
7543	277.27	2	0	1	0	0	0	0.0246682
7545	277.304	2	0	1	0	0	0	0.0245782
7547	277.337	2	0	1	0	0	0	0.0245863
7549	277.37	2	0	1	0	0	0	0.0244841
7551	277.404	2	0	1	0	0	0	0.0244018
7553	277.437	2	0	1	0	0	0	0.0244749
7555	277.47	2	0	1	0	0	0	0.0244008
7557	277.504	2	0	1	0	0	0	0.0242963
7559	277.537	2	0	1	0	0	0	0.024346
7561	277.57	2	0	1	0	0	0	0.0243924
7563	277.604	2	0	1	0	0	0	0.0243227
7565	277.637	2	0	1	0	0	0	0.0242458
7567	277.67	2	0	1	0	0	0	0.0242783
7569	277.704	2	0	1	0	0	0	0.0240665
7571	277.737	2	0	1	0	0	0	0.0238935
7573	277.77	2	0	1	0	0	0	0.0241501
7575	277.804	2	0	1	0	0	0	0.0241372
7577	277.837	2	0	1	0	0	0	0.0238834
7579	277.87	2	0	1	0	0	0	0.0238573
7581	277.904	2	0	1	0	0	0	0.0237369
7583	277.937	2	0	1	0	0	0	0.0237419
7585	277.97	2	0	1	0	0	0	0.023678
7587	278.003	2	0	1	0	0	0	0.0235335
7589	278.037	2	0	1	0	0	0	0.0233176
7591	278.07	2	0	1	0	0	0	0.0233676
7593	278.103	2	0	1	0	0	0	0.0234864
7595	278.137	2	0	1	0	0	0	0.0233619
7597	278.17	2	0	1	0	0	0	0.0231653
7599	278.203	2	0	1	0	0	0	0.0233467
7601	278.237	2	0	1	0	0	0	0.0235697
7603	278.27	2	0	1	0	0	0	0.0234864
7605	278.303	2	0	1	0	0	0	0.0235714
7607	278.337	2	0	1	0	0	0	0.023681
7609	278.37	2	0	1	0	0	0	0.0235355
7611	278.403	2	0	1	0	0	0	0.0234184
7613	278.437	2	0	1	0	0	0	0.0236218
7615	278.47	2	0	1	0	0	0	0.0235389
7617	278.503	2	0	1	0	0	0	0.0239832
7619	278.537	2	0	1	0	0	0	0.023969
7621	278.57	2	0	1	0	0	0	0.0238343
7623	278.603	2	0	1	0	0	0	0.0238705
7625	278.637	2	0	1	0	0	0	0.0239
7627	278.67	2	0	1	0	0	0	0.0240553
7629	278.703	2	0	1	0	0	0	0.0241535
7631	278.737	2	0	1	0	0	0	0.0241609
7633	278.77	2	0	1	0	0	0	0.024301
7635	278.803	2	0	1	0	0	0	0.0241433
7637	278.837	2	0	1	0	0	0	0.0240279
7639	278.87	2	0	1	0	0	0	0.0238587
7641	278.903	2	0	1	0	0	0	0.0238858
7643	278.937	2	0	1	0	0	0	0.0237758
7645	278.97	2	0	1	0	0	0	0.0236086
7647	279.003	2	0	1	0	0	0	0.0237007
7649	279.037	2	0	1	0	0	0	0.0236776
7651	279.07	2	0	1	0	0	0	0.023483
7653	279.103	2	0	1	0	0	0	0.0234407
7655	279.137	2	0	1	0	0	0	0.0234891
7657	279.17	2	0	1	0	0	0	0.0235856
7659	279.203	2	0	1	0	0	0	0.0234861
7661	279.237	2	0	1	0	0	0	0.0233253
7663	279.27	2	0	1	0	0	0	0.0234715
7665	279.303	2	0	1	0	0	0	0.0232495
7667	279.337	2	0	1	0	0	0	0.0229758
7669	279.37	2	0	1	0	0	0	0.0230614
7671	279.403	2	0	1	0	0	0	0.0230935
7673	279.437	2	0	1	0	0	0	0.0233355
7675	279.47	2	0	1	0	0	0	0.0233575
7677	279.503	2	0	1	0	0	0	0.0235074
7679	279.537	2	0	1	0	0	0	0.0235264
7681	279.57	2	0	1	0	0	0	0.0234262
7683	279.603	2	0	1	0	0	0	0.023527
7685	279.637	2	0	1	0	0	0	0.0232414
7687	279.67	2	0	1	0	0	0	0.0230083
7689	279.703	2	0	1	0	0	0	0.0230299
7691	279.737	2	0	1	0	0	0	0.0229697
7693	279.77	2	0	1	0	0	0	0.0227808
7695	279.803	2	0	1	0	0	0	0.0228269
7697	279.837	2	0	1	0	0	0	0.0228421
7699	279.87	2	0	1	0	0	0	0.0227314
7701	279.903	2	0	1	0	0	0	0.0230025
7703	279.937	2	0	1	0	0	0	0.0231044
7705	279.97	2	0	1	0	0	0	0.0231331
7707	280.003	2	0	1	0	0	0	0.0232918
7709	280.037	2	0	1	0	0	0	0.0232983
7711	280.07	2	0	1	0	0	0	0.0231193
7713	280.103	2	0	1	0	0	0	0.0229819
7715	280.137	2	0	1	0	0	0	0.0230302
7717	280.17	2	0	1	0	0	0	0.0228851
7719	280.203	2	0	1	0	0	0	0.0227683
7721	280.237	2	0	1	0	0	0	0.0227873
7723	280.27	2	0	1	0	0	0	0.022747
7725	280.303	2	0	1	0	0	0	0.0227703
7727	280.337	2	0	1	0	0	0	0.0228888
7729	280.37	2	0	1	0	0	0	0.0229676
7731	280.403	2	0	1	0	0	0	0.0229998
7733	280.437	2	0	1	0	0	0	0.0229869
7735	280.47	2	0	1	0	0	0	0.0230617
7737	280.503	2	0	1	0	0	0	0.022989
7739	280.537	2	0	1	0	0	0	0.0230648
7741	280.57	2	0	1	0	0	0	0.023593
7743	280.603	2	0	1	0	0	0	0.0236519
7745	280.637	2	0	1	0	0	0	0.0235578
7747	280.67	2	0	1	0	0	0	0.0233873
7749	280.703	2	0	1	0	0	0	0.0233761
7751	280.737	2	0	1	0	0	0	0.0232032
7753	280.77	2	0	1	0	0	0	0.0227988
7755	280.803	2	0	1	0	0	0	0.0228546
7757	280.837	2	0	1	0	0	0	0.0231331
7759	280.87	2	0	1	0	0	0	0.0230851
7761	280.903	2	0	1	0	0	0	0.0231182
7763	280.937	2	0	1	0	0	0	0.0231605
7765	280.97	2	0	1	0	0	0	0.0231687
7767	281.003	2	0	1	0	0	0	0.0228133
7769	281.037	2	0	1	0	0	0	0.0227517
7771	281.07	2	0	1	0	0	0	0.0230536
7773	281.103	2	0	1	0	0	0	0.0231873
7775	281.137	2	0	1	0	0	0	0.0233602
7777	281.17	2	0	1	0	0	0	0.0231507
7779	281.203	2	0	1	0	0	0	0.0230478
7781	281.237	2	0	1	0	0	0	0.022901
7783	281.27	2	0	1	0	0	0	0.0227575
7785	281.303	2	0	1	0	0	0	0.022945
7787	281.337	2	0	1	0	0	0	0.0233477
7789	281.37	2	0	1	0	0	0	0.0233423
7791	281.403	2	0	1	0	0	0	0.0233416
7793	281.437	2	0	1	0	0	0	0.0234404
7795	281.47	2	0	1	0	0	0	0.0234739
7797	281.503	2	0	1	0	0	0	0.0236841
7799	281.537	2	0	1	0	0	0	0.0235572
7801	281.57	2	0	1	0	0	0	0.0234983
7803	281.603	2	0	1	0	0	0	0.023435
7805	281.637	2	0	1	0	0	0	0.0231632
7807	281.67	2	0	1	0	0	0	0.0230678
7809	281.703	2	0	1	0	0	0	0.0232742
7811	281.737	2	0	1	0	0	0	0.023366
7813	281.77	2	0	1	0	0	0	0.0233588
7815	281.803	2	0	1	0	0	0	0.0232546
7817	281.837	2	0	1	0	0	0	0.023327
7819	281.87	2	0	1	0	0	0	0.0230776
7821	281.903	2	0	1	0	0	0	0.0230969
7823	281.937	2	0	1	0	0	0	0.0231524
7825	281.97	2	0	1	0	0	0	0.0231626
7827	282.003	2	0	1	0	0	0	0.0233687
7829	282.037	2	0	1	0	0	0	0.023437
7831	282.07	2	0	1	0	0	0	0.0232814
7833	282.103	2	0	1	0	0	0	0.023504
7835	282.137	2	0	1	0	0	0	0.0235646
7837	282.17	2	0	1	0	0	0	0.0236184
7839	282.203	2	0	1	0	0	0	0.0238421
7841	282.237	2	0	1	0	0	0	0.0240387
7843	282.27	2	0	1	0	0	0	0.0239646
7845	282.303	2	0	1	0	0	0	0.0240858
7847	282.337	2	0	1	0	0	0	0.0238942
7849	282.37	2	0	1	0	0	0	0.0235081
7851	282.403	2	0	1	0	0	0	0.0234759
7853	282.437	2	0	1	0	0	0	0.0236005
7855	282.47	2	0	1	0	0	0	0.0235771
7857	282.503	2	0	1	0	0	0	0.0236309
7859	282.537	2	0	1	0	0	0	0.0236374
7861	282.57	2	0	1	0	0	0	0.0235741
7863	282.603	2	0	1	0	0	0	0.0236739
7865	282.637	2	0	1	0	0	0	0.0238634
7867	282.67	2	0	1	0	0	0	0.0238607
7869	282.703	2	0	1	0	0	0	0.0239233
7871	282.737	2	0	1	0	0	0	0.0241155
7873	282.77	2	0	1	0	0	0	0.0239521
7875	282.803	2	0	1	0	0	0	0.023925
7877	282.837	2	0	1	0	0	0	0.0240448
7879	282.87	2	0	1	0	0	0	0.0238959
7881	282.903	2	0	1	0	0	0	0.0238123
7883	282.937	2	0	1	0	0	0	0.0238086
7885	282.97	2	0	1	0	0	0	0.0237413
7887	283.003	2	0	1	0	0	0	0.0238248
7889	283.037	2	0	1	0	0	0	0.0237666
7891	283.07	2	0	1	0	0	0	0.0236164
7893	283.103	2	0	1	0	0	0	0.0237413
7895	283.137	2	0	1	0	0	0	0.0238773
7897	283.17	2	0	1	0	0	0	0.023882
7899	283.203	2	0	1	0	0	0	0.0239342
7901	283.237	2	0	1	0	0	0	0.0239582
7903	283.27	2	0	1	0	0	0	0.0239362
7905	283.303	2	0	1	0	0	0	0.024236
7907	283.337	2	0	1	0	0	0	0.0242448
7909	283.37	2	0	1	0	0	0	0.0241978
7911	283.403	2	0	1	0	0	0	0.0243
7913	283.437	2	0	1	0	0	0	0.024146
7915	283.47	2	0	1	0	0	0	0.0240458
7917	283.503	2	0	1	0	0	0	0.024079
7919	283.537	2	0	1	0	0	0	0.0238597
7921	283.57	2	0	1	0	0	0	0.0237707
7923	283.603	2	0	1	0	0	0	0.0238336
7925	283.637	2	0	1	0	0	0	0.0237504
7927	283.67	2	0	1	0	0	0	0.0236803
7929	283.703	2	0	1	0	0	0	0.0238296
7931	283.737	2	0	1	0	0	0	0.0238225
7933	283.77	2	0	1	0	0	0	0.0236621
7935	283.803	2	0	1	0	0	0	0.0238512
7937	283.837	2	0	1	0	0	0	0.0237961
7939	283.87	2	0	1	0	0	0	0.0235849
7941	283.903	2	0	1	0	0	0	0.0236106
7943	283.937	2	0	1	0	0	0	0.0234905
7945	283.97	2	0	1	0	0	0	0.0232309
7947	284.003	2	0	1	0	0	0	0.0234076
7949	284.037	2	0	1	0	0	0	0.0234157
7951	284.07	2	0	1	0	0	0	0.0233213
7953	284.103	2	0	1	0	0	0	0.0234147
7955	284.137	2	0	1	0	0	0	0.0234492
7957	284.17	2	0	1	0	0	0	0.0234567
7959	284.203	2	0	1	0	0	0	0.0233741
7961	284.237	2	0	1	0	0	0	0.023414
7963	284.27	2	0	1	0	0	0	0.0233829
7965	284.303	2	0	1	0	0	0	0.0233619
7967	284.337	2	0	1	0	0	0	0.0235314
7969	284.37	2	0	1	0	0	0	0.0234299
7971	284.403	2	0	1	0	0	0	0.0233125
7973	284.437	2	0	1	0	0	0	0.0232868
7975	284.47	2	0	1	0	0	0	0.0235118
7977	284.503	2	0	1	0	0	0	0.0232377
7979	284.537	2	0	1	0	0	0	0.0235101
7981	284.57	2	0	1	0	0	0	0.0234793
7983	284.603	2	0	1	0	0	0	0.0232404
7985	284.637	2	0	1	0	0	0	0.023326
7987	284.67	2	0	1	0	0	0	0.023638
7989	284.703	2	0	1	0	0	0	0.0236164
7991	284.737	2	0	1	0	0	0	0.0236685
7993	284.77	2	0	1	0	0	0	0.0239227
7995	284.803	2	0	1	0	0	0	0.0239585
7997	284.837	2	0	1	0	0	0	0.0240079
7999	284.87	2	0	1	0	0	0	0.0241897
8001	284.903	2	0	1	0	0	0	0.0242651
8003	284.937	2	0	1	0	0	0	0.0242079
8005	284.97	2	0	1	0	0	0	0.0241724
8007	285.003	2	0	1	0	0	0	0.0237944
8009	285.037	2	0	1	0	0	0	0.0235829
8011	285.07	2	0	1	0	0	0	0.0236902
8013	285.103	2	0	1	0	0	0	0.0237345
8015	285.137	2	0	1	0	0	0	0.0239331
8017	285.17	2	0	1	0	0	0	0.0241616
8019	285.203	2	0	1	0	0	0	0.0241487
8021	285.237	2	0	1	0	0	0	0.0242452
8023	285.27	2	0	1	0	0	0	0.0240675
8025	285.303	2	0	1	0	0	0	0.0238191
8027	285.337	2	0	1	0	0	0	0.0238722
8029	285.37	2	0	1	0	0	0	0.0240878
8031	285.403	2	0	1	0	0	0	0.0239507
8033	285.437	2	0	1	0	0	0	0.0239741
8035	285.47	2	0	1	0	0	0	0.0240634
8037	285.503	2	0	1	0	0	0	0.0240695
8039	285.537	2	0	1	0	0	0	0.02386
8041	285.57	2	0	1	0	0	0	0.0238898
8043	285.603	2	0	1	0	0	0	0.0237348
8045	285.637	2	0	1	0	0	0	0.0236282
8047	285.67	2	0	1	0	0	0	0.0236414
8049	285.703	2	0	1	0	0	0	0.0234533
8051	285.737	2	0	1	0	0	0	0.023366
8053	285.77	2	0	1	0	0	0	0.0238908
8055	285.803	2	0	1	0	0	0	0.0238665
8057	285.837	2	0	1	0	0	0	0.0236705
8059	285.87	2	0	1	0	0	0	0.0238316
8061	285.903	2	0	1	0	0	0	0.0233646
8063	285.937	2	0	1	0	0	0	0.022749
8065	285.97	2	0	1	0	0	0	0.0228086
8067	286.003	2	0	1	0	0	0	0.0232533
8069	286.037	2	0	1	0	0	0	0.0234235
8071	286.07	2	0	1	0	0	0	0.0236113
8073	286.103	2	0	1	0	0	0	0.0234079
8075	286.137	2	0	1	0	0	0	0.0231064
8077	286.17	2	0	1	0	0	0	0.0227954
8079	286.203	2	0	1	0	0	0	0.0229226
8081	286.237	2	0	1	0	0	0	0.0231883
8083	286.27	2	0	1	0	0	0	0.0232275
8085	286.303	2	0	1	0	0	0	0.0231135
8087	286.337	2	0	1	0	0	0	0.0231372
8089	286.37	2	0	1	0	0	0	0.0230901
8091	286.403	2	0	1	0	0	0	0.0229402
8093	286.437	2	0	1	0	0	0	0.0230949
8095	286.47	2	0	1	0	0	0	0.0230573
8097	286.503	2	0	1	0	0	0	0.0229392
8099	286.536	2	0	1	0	0	0	0.0226319
8101	286.57	2	0	1	0	0	0	0.0226539
8103	286.603	2	0	1	0	0	0	0.0226089
8105	286.636	2	0	1	0	0	0	0.0227402
8107	286.67	2	0	1	0	0	0	0.0228309
8109	286.703	2	0	1	0	0	0	0.0231416
8111	286.736	2	0	1	0	0	0	0.0233128
8113	286.77	2	0	1	0	0	0	0.0230969
8115	286.803	2	0	1	0	0	0	0.0228428
8117	286.836	2	0	1	0	0	0	0.0226556
8119	286.87	2	0	1	0	0	0	0.0226306
8121	286.903	2	0	1	0	0	0	0.022923
8123	286.936	2	0	1	0	0	0	0.0226235
8125	286.97	2	0	1	0	0	0	0.022548
8127	287.003	2	0	1	0	0	0	0.0224884
8129	287.036	2	0	1	0	0	0	0.0223879
8131	287.07	2	0	1	0	0	0	0.022636
8133	287.103	2	0	1	0	0	0	0.022838
8135	287.136	2	0	1	0	0	0	0.0228874
8137	287.17	2	0	1	0	0	0	0.0229003
8139	287.203	2	0	1	0	0	0	0.022723
8141	287.236	2	0	1	0	0	0	0.0228008
8143	287.27	2	0	1	0	0	0	0.0223101
8145	287.303	2	0	1	0	0	0	0.0221669
8147	287.336	2	0	1	0	0	0	0.0223558
8149	287.37	2	0	1	0	0	0	0.0226238
8151	287.403	2	0	1	0	0	0	0.0227588
8153	287.436	2	0	1	0	0	0	0.0230005
8155	287.47	2	0	1	0	0	0	0.023281
8157	287.503	2	0	1	0	0	0	0.0232089
8159	287.536	2	0	1	0	0	0	0.0231419
8161	287.57	2	0	1	0	0	0	0.0233551
8163	287.603	2	0	1	0	0	0	0.0233142
8165	287.636	2	0	1	0	0	0	0.023282
8167	287.67	2	0	1	0	0	0	0.0231189
8169	287.703	2	0	1	0	0	0	0.0232631
8171	287.736	2	0	1	0	0	0	0.0231243
8173	287.77	2	0	1	0	0	0	0.0226962
8175	287.803	2	0	1	0	0	0	0.0228421
8177	287.836	2	0	1	0	0	0	0.0227663
8179	287.87	2	0	1	0	0	0	0.0229308
8181	287.903	2	0	1	0	0	0	0.0230857
8183	287.936	2	0	1	0	0	0	0.0232242
8185	287.97	2	0	1	0	0	0	0.0232553
8187	288.003	2	0	1	0	0	0	0.0232915
8189	288.036	2	0	1	0	0	0	0.0229324
8191	288.07	2	0	1	0	0	0	0.0226956
8193	288.103	2	0	1	0	0	0	0.0224417
8195	288.136	2	0	1	0	0	0	0.0224796
8197	288.17	2	0	1	0	0	0	0.0227832
8199	288.203	2	0	1	0	0	0	0.0229555
8201	288.236	2	0	1	0	0	0	0.0230698
8203	288.27	2	0	1	0	0	0	0.0230106
8205	288.303	2	0	1	0	0	0	0.0228692
8207	288.336	2	0	1	0	0	0	0.0229473
8209	288.37	2	0	1	0	0	0	0.0228573
8211	288.403	2	0	1	0	0	0	0.0227152
8213	288.436	2	0	1	0	0	0	0.0229666
8215	288.47	2	0	1	0	0	0	0.0231355
8217	288.503	2	0	1	0	0	0	0.023166
8219	288.536	2	0	1	0	0	0	0.0232993
8221	288.57	2	0	1	0	0	0	0.0232045
8223	288.603	2	0	1	0	0	0	0.0231673
8225	288.636	2	0	1	0	0	0	0.0232252
8227	288.67	2	0	1	0	0	0	0.0229338
8229	288.703	2	0	1	0	0	0	0.0229754
8231	288.736	2	0	1	0	0	0	0.0230725
8233	288.77	2	0	1	0	0	0	0.0229091
8235	288.803	2	0	1	0	0	0	0.022994
8237	288.836	2	0	1	0	0	0	0.0229423
8239	288.87	2	0	1	0	0	0	0.022794
8241	288.903	2	0	1	0	0	0	0.0228367
8243	288.936	2	0	1	0	0	0	0.0228275
8245	288.97	2	0	1	0	0	0	0.0229531
8247	289.003	2	0	1	0	0	0	0.0229849
8249	289.036	2	0	1	0	0	0	0.0229582
8251	289.07	2	0	1	0	0	0	0.0230221
8253	289.103	2	0	1	0	0	0	0.0229656
8255	289.136	2	0	1	0	0	0	0.0229328
8257	289.17	2	0	1	0	0	0	0.0229409
8259	289.203	2	0	1	0	0	0	0.0229108
8261	289.236	2	0	1	0	0	0	0.0227944
8263	289.27	2	0	1	0	0	0	0.0230475
8265	289.303	2	0	1	0	0	0	0.0230252
8267	289.336	2	0	1	0	0	0	0.0229626
8269	289.37	2	0	1	0	0	0	0.0229961
8271	289.403	2	0	1	0	0	0	0.0229798
8273	289.436	2	0	1	0	0	0	0.0228211
8275	289.47	2	0	1	0	0	0	0.0227693
8277	289.503	2	0	1	0	0	0	0.0227917
8279	289.536	2	0	1	0	0	0	0.0229037
8281	289.57	2	0	1	0	0	0	0.0230319
8283	289.603	2	0	1	0	0	0	0.0228956
8285	289.636	2	0	1	0	0	0	0.0228979
8287	289.67	2	0	1	0	0	0	0.0230749
8289	289.703	2	0	1	0	0	0	0.0230566
8291	289.736	2	0	1	0	0	0	0.0231453
8293	289.77	2	0	1	0	0	0	0.0230793
8295	289.803	2	0	1	0	0	0	0.0228908
8297	289.836	2	0	1	0	0	0	0.0227879
8299	289.87	2	0	1	0	0	0	0.0228289
8301	289.903	2	0	1	0	0	0	0.0226038
8303	289.936	2	0	1	0	0	0	0.0225805
8305	289.97	2	0	1	0	0	0	0.0225893
8307	290.003	2	0	1	0	0	0	0.0226485
8309	290.036	2	0	1	0	0	0	0.0227971
8311	290.07	2	0	1	0	0	0	0.0226549
8313	290.103	2	0	1	0	0	0	0.0225758
8315	290.136	2	0	1	0	0	0	0.0226749
8317	290.17	2	0	1	0	0	0	0.0223879
8319	290.203	2	0	1	0	0	0	0.0222411
8321	290.236	2	0	1	0	0	0	0.0223856
8323	290.27	2	0	1	0	0	0	0.0221707
8325	290.303	2	0	1	0	0	0	0.0220749
8327	290.336	2	0	1	0	0	0	0.0222993
8329	290.37	2	0	1	0	0	0	0.0224593
8331	290.403	2	0	1	0	0	0	0.0226813
8333	290.436	2	0	1	0	0	0	0.0227737
8335	290.47	2	0	1	0	0	0	0.0227206
8337	290.503	2	0	1	0	0	0	0.022811
8339	290.536	2	0	1	0	0	0	0.0228786
8341	290.57	2	0	1	0	0	0	0.0228292
8343	290.603	2	0	1	0	0	0	0.0229507
8345	290.636	2	0	1	0	0	0	0.022971
8347	290.67	2	0	1	0	0	0	0.0228533
8349	290.703	2	0	1	0	0	0	0.0229571
8351	290.736	2	0	1	0	0	0	0.0229521
8353	290.77	2	0	1	0	0	0	0.0227778
8355	290.803	2	0	1	0	0	0	0.0228996
8357	290.836	2	0	1	0	0	0	0.0230086
8359	290.87	2	0	1	0	0	0	0.0229802
8361	290.903	2	0	1	0	0	0	0.0231798
8363	290.936	2	0	1	0	0	0	0.0233223
8365	290.97	2	0	1	0	0	0	0.0232546
8367	291.003	2	0	1	0	0	0	0.0234438
8369	291.036	2	0	1	0	0	0	0.0235924
8371	291.07	2	0	1	0	0	0	0.0235849
8373	291.103	2	0	1	0	0	0	0.0236441
8375	291.136	2	0	1	0	0	0	0.0238177
8377	291.17	2	0	1	0	0	0	0.0237358
8379	291.203	2	0	1	0	0	0	0.023567
8381	291.236	2	0	1	0	0	0	0.0237765
8383	291.27	2	0	1	0	0	0	0.0236837
8385	291.303	2	0	1	0	0	0	0.0235673
8387	291.336	2	0	1	0	0	0	0.0236908
8389	291.37	2	0	1	0	0	0	0.0236692
8391	291.403	2	0	1	0	0	0	0.0235311
8393	291.436	2	0	1	0	0	0	0.0234309
8395	291.47	2	0	1	0	0	0	0.0235785
8397	291.503	2	0	1	0	0	0	0.0235003
8399	291.536	2	0	1	0	0	0	0.0231727
8401	291.57	2	0	1	0	0	0	0.0232462
8403	291.603	2	0	1	0	0	0	0.0229636
8405	291.636	2	0	1	0	0	0	0.0225186
8407	291.67	2	0	1	0	0	0	0.0224898
8409	291.703	2	0	1	0	0	0	0.0224898
8411	291.736	2	0	1	0	0	0	0.0226103
8413	291.77	2	0	1	0	0	0	0.0225842
8415	291.803	2	0	1	0	0	0	0.02266
8417	291.836	2	0	1	0	0	0	0.0224306
8419	291.87	2	0	1	0	0	0	0.0225842
8421	291.903	2	0	1	0	0	0	0.0225335
8423	291.936	2	0	1	0	0	0	0.0225592
8425	291.97	2	0	1	0	0	0	0.0227382
8427	292.003	2	0	1	0	0	0	0.0232269
8429	292.036	2	0	1	0	0	0	0.0235047
8431	292.07	2	0	1	0	0	0	0.0237619
8433	292.103	2	0	1	0	0	0	0.0237487
8435	292.136	2	0	1	0	0	0	0.0237524
8437	292.17	2	0	1	0	0	0	0.0235599
8439	292.203	2	0	1	0	0	0	0.0231308
8441	292.236	2	0	1	0	0	0	0.0232231
8443	292.27	2	0	1	0	0	0	0.0230993
8445	292.303	2	0	1	0	0	0	0.0228089
8447	292.336	2	0	1	0	0	0	0.0229423
8449	292.37	2	0	1	0	0	0	0.0230221
8451	292.403	2	0	1	0	0	0	0.0227389
8453	292.436	2	0	1	0	0	0	0.0228533
8455	292.47	2	0	1	0	0	0	0.0230536
8457	292.503	2	0	1	0	0	0	0.0228773
8459	292.536	2	0	1	0	0	0	0.0228022
8461	292.57	2	0	1	0	0	0	0.0227013
8463	292.603	2	0	1	0	0	0	0.0222583
8465	292.636	2	0	1	0	0	0	0.0224011
8467	292.67	2	0	1	0	0	0	0.0225331
8469	292.703	2	0	1	0	0	0	0.0226732
8471	292.736	2	0	1	0	0	0	0.0230983
8473	292.77	2	0	1	0	0	0	0.0231159
8475	292.803	2	0	1	0	0	0	0.0231971
8477	292.836	2	0	1	0	0	0	0.023103
8479	292.87	2	0	1	0	0	0	0.0228813
8481	292.903	2	0	1	0	0	0	0.0229846
8483	292.936	2	0	1	0	0	0	0.023014
8485	292.97	2	0	1	0	0	0	0.0231392
8487	293.003	2	0	1	0	0	0	0.0233605
8489	293.036	2	0	1	0	0	0	0.023455
8491	293.07	2	0	1	0	0	0	0.023503
8493	293.103	2	0	1	0	0	0	0.0236834
8495	293.136	2	0	1	0	0	0	0.0239023
8497	293.17	2	0	1	0	0	0	0.0238489
8499	293.203	2	0	1	0	0	0	0.0237957
8501	293.236	2	0	1	0	0	0	0.0237853
8503	293.27	2	0	1	0	0	0	0.0234445
8505	293.303	2	0	1	0	0	0	0.0234556
8507	293.336	2	0	1	0	0	0	0.0236269
8509	293.37	2	0	1	0	0	0	0.0236015
8511	293.403	2	0	1	0	0	0	0.0237568
8513	293.436	2	0	1	0	0	0	0.0237714
8515	293.47	2	0	1	0	0	0	0.0236336
8517	293.503	2	0	1	0	0	0	0.0237386
8519	293.536	2	0	1	0	0	0	0.0235924
8521	293.57	2	0	1	0	0	0	0.0235318
8523	293.603	2	0	1	0	0	0	0.0236154
8525	293.636	2	0	1	0	0	0	0.0234492
8527	293.67	2	0	1	0	0	0	0.0234177
8529	293.703	2	0	1	0	0	0	0.0234523
8531	293.736	2	0	1	0	0	0	0.0232817
8533	293.77	2	0	1	0	0	0	0.023211
8535	293.803	2	0	1	0	0	0	0.0232665
8537	293.836	2	0	1	0	0	0	0.0231193
8539	293.87	2	0	1	0	0	0	0.0230516
8541	293.903	2	0	1	0	0	0	0.023017
8543	293.936	2	0	1	0	0	0	0.0228742
8545	293.97	2	0	1	0	0	0	0.0230357
8547	294.003	2	0	1	0	0	0	0.0230742
8549	294.036	2	0	1	0	0	0	0.022794
8551	294.07	2	0	1	0	0	0	0.0227406
8553	294.103	2	0	1	0	0	0	0.0230319
8555	294.136	2	0	1	0	0	0	0.0230857
8557	294.17	2	0	1	0	0	0	0.0232912
8559	294.203	2	0	1	0	0	0	0.0232539
8561	294.236	2	0	1	0	0	0	0.0232414
8563	294.27	2	0	1	0	0	0	0.0233829
8565	294.303	2	0	1	0	0	0	0.0233643
8567	294.336	2	0	1	0	0	0	0.0233186
8569	294.37	2	0	1	0	0	0	0.0234533
8571	294.403	2	0	1	0	0	0	0.023438
8573	294.436	2	0	1	0	0	0	0.0232858
8575	294.47	2	0	1	0	0	0	0.0232668
8577	294.503	2	0	1	0	0	0	0.0231105
8579	294.536	2	0	1	0	0	0	0.0231162
8581	294.57	2	0	1	0	0	0	0.0230387
8583	294.603	2	0	1	0	0	0	0.0230506
8585	294.636	2	0	1	0	0	0	0.0230485
8587	294.67	2	0	1	0	0	0	0.0229991
8589	294.703	2	0	1	0	0	0	0.0228966
8591	294.736	2	0	1	0	0	0	0.0229155
8593	294.77	2	0	1	0	0	0	0.0228543
8595	294.803	2	0	1	0	0	0	0.0227362
8597	294.836	2	0	1	0	0	0	0.0226736
8599	294.87	2	0	1	0	0	0	0.0227037
8601	294.903	2	0	1	0	0	0	0.0226272
8603	294.936	2	0	1	0	0	0	0.0225957
8605	294.97	2	0	1	0	0	0	0.0225554
8607	295.003	2	0	1	0	0	0	0.0224644
8609	295.036	2	0	1	0	0	0	0.0225538
8611	295.069	2	0	1	0	0	0	0.0226455
8613	295.103	2	0	1	0	0	0	0.0226895
8615	295.136	2	0	1	0	0	0	0.0226668
8617	295.169	2	0	1	0	0	0	0.0227615
8619	295.203	2	0	1	0	0	0	0.0226956
8621	295.236	2	0	1	0	0	0	0.0226414
8623	295.269	2	0	1	0	0	0	0.0226353
8625	295.303	2	0	1	0	0	0	0.0225406
8627	295.336	2	0	1	0	0	0	0.0224675
8629	295.369	2	0	1	0	0	0	0.0225307
8631	295.403	2	0	1	0	0	0	0.0223933
8633	295.436	2	0	1	0	0	0	0.0224191
8635	295.469	2	0	1	0	0	0	0.0225081
8637	295.503	2	0	1	0	0	0	0.0224421
8639	295.536	2	0	1	0	0	0	0.0225984
8641	295.569	2	0	1	0	0	0	0.0225903
8643	295.603	2	0	1	0	0	0	0.0225253
8645	295.636	2	0	1	0	0	0	0.022595
8647	295.669	2	0	1	0	0	0	0.0226482
8649	295.703	2	0	1	0	0	0	0.0225213
8651	295.736	2	0	1	0	0	0	0.022589
8653	295.769	2	0	1	0	0	0	0.0226607
8655	295.803	2	0	1	0	0	0	0.0226648
8657	295.836	2	0	1	0	0	0	0.0228282
8659	295.869	2	0	1	0	0	0	0.0227869
8661	295.903	2	0	1	0	0	0	0.0228299
8663	295.936	2	0	1	0	0	0	0.0228495
8665	295.969	2	0	1	0	0	0	0.0227994
8667	296.003	2	0	1	0	0	0	0.0227406
8669	296.036	2	0	1	0	0	0	0.022659
8671	296.069	2	0	1	0	0	0	0.022573
8673	296.103	2	0	1	0	0	0	0.0226167
8675	296.136	2	0	1	0	0	0	0.0225213
8677	296.169	2	0	1	0	0	0	0.0224272
8679	296.203	2	0	1	0	0	0	0.0224817
8681	296.236	2	0	1	0	0	0	0.0224113
8683	296.269	2	0	1	0	0	0	0.0223896
8685	296.303	2	0	1	0	0	0	0.0224759
8687	296.336	2	0	1	0	0	0	0.022459
8689	296.369	2	0	1	0	0	0	0.02239
8691	296.403	2	0	1	0	0	0	0.0223497
8693	296.436	2	0	1	0	0	0	0.022279
8695	296.469	2	0	1	0	0	0	0.0221639
8697	296.503	2	0	1	0	0	0	0.0221717
8699	296.536	2	0	1	0	0	0	0.0221125
8701	296.569	2	0	1	0	0	0	0.0219615
8703	296.603	2	0	1	0	0	0	0.0219213
8705	296.636	2	0	1	0	0	0	0.0220241
8707	296.669	2	0	1	0	0	0	0.0219348
8709	296.703	2	0	1	0	0	0	0.0218806
8711	296.736	2	0	1	0	0	0	0.0219497
8713	296.769	2	0	1	0	0	0	0.0218844
8715	296.803	2	0	1	0	0	0	0.0217971
8717	296.836	2	0	1	0	0	0	0.0218004
8719	296.869	2	0	1	0	0	0	0.0219757
8721	296.903	2	0	1	0	0	0	0.0218522
8723	296.936	2	0	1	0	0	0	0.0219037
8725	296.969	2	0	1	0	0	0	0.0218806
8727	297.003	2	0	1	0	0	0	0.0217903
8729	297.036	2	0	1	0	0	0	0.0218116
8731	297.069	2	0	1	0	0	0	0.0217988
8733	297.103	2	0	1	0	0	0	0.0217097
8735	297.136	2	0	1	0	0	0	0.0217476
8737	297.169	2	0	1	0	0	0	0.0217554
8739	297.203	2	0	1	0	0	0	0.0217707
8741	297.236	2	0	1	0	0	0	0.0217795
8743	297.269	2	0	1	0	0	0	0.0216932
8745	297.303	2	0	1	0	0	0	0.0216532
8747	297.336	2	0	1	0	0	0	0.0217138
8749	297.369	2	0	1	0	0	0	0.0216773
8751	297.403	2	0	1	0	0	0	0.0215416
8753	297.436	2	0	1	0	0	0	0.0215839
8755	297.469	2	0	1	0	0	0	0.0215568
8757	297.503	2	0	1	0	0	0	0.0215416
8759	297.536	2	0	1	0	0	0	0.0215148
8761	297.569	2	0	1	0	0	0	0.0215612
8763	297.603	2	0	1	0	0	0	0.0214011
8765	297.636	2	0	1	0	0	0	0.0215229
8767	297.669	2	0	1	0	0	0	0.0216969
8769	297.703	2	0	1	0	0	0	0.0216251
8771	297.736	2	0	1	0	0	0	0.0215791
8773	297.769	2	0	1	0	0	0	0.0216661
8775	297.803	2	0	1	0	0	0	0.0215984
8777	297.836	2	0	1	0	0	0	0.0215453
8779	297.869	2	0	1	0	0	0	0.0216295
8781	297.903	2	0	1	0	0	0	0.0215578
8783	297.936	2	0	1	0	0	0	0.0214603
8785	297.969	2	0	1	0	0	0	0.0215798
8787	298.003	2	0	1	0	0	0	0.0215439
8789	298.036	2	0	1	0	0	0	0.0214512
8791	298.069	2	0	1	0	0	0	0.021417
8793	298.103	2	0	1	0	0	0	0.0213581
8795	298.136	2	0	1	0	0	0	0.0212268
8797	298.169	2	0	1	0	0	0	0.0212691
8799	298.203	2	0	1	0	0	0	0.0212163
8801	298.236	2	0	1	0	0	0	0.0211399
8803	298.269	2	0	1	0	0	0	0.0211828
8805	298.303	2	0	1	0	0	0	0.0212417
8807	298.336	2	0	1	0	0	0	0.0213619
8809	298.369	2	0	1	0	0	0	0.0215355
8811	298.403	2	0	1	0	0	0	0.0216295
8813	298.436	2	0	1	0	0	0	0.021524
8815	298.469	2	0	1	0	0	0	0.0213862
8817	298.503	2	0	1	0	0	0	0.0214441
8819	298.536	2	0	1	0	0	0	0.0214282
8821	298.569	2	0	1	0	0	0	0.0214322
8823	298.603	2	0	1	0	0	0	0.0214756
8825	298.636	2	0	1	0	0	0	0.0213744
8827	298.669	2	0	1	0	0	0	0.0214624
8829	298.703	2	0	1	0	0	0	0.021547
8831	298.736	2	0	1	0	0	0	0.0214075
8833	298.769	2	0	1	0	0	0	0.0213774
8835	298.803	2	0	1	0	0	0	0.0214898
8837	298.836	2	0	1	0	0	0	0.0215168
8839	298.869	2	0	1	0	0	0	0.0213138
8841	298.903	2	0	1	0	0	0	0.0213866
8843	298.936	2	0	1	0	0	0	0.0215182
8845	298.969	2	0	1	0	0	0	0.0213135
8847	299.003	2	0	1	0	0	0	0.0212201
8849	299.036	2	0	1	0	0	0	0.0211798
8851	299.069	2	0	1	0	0	0	0.0211503
8853	299.103	2	0	1	0	0	0	0.0211463
8855	299.136	2	0	1	0	0	0	0.0212065
8857	299.169	2	0	1	0	0	0	0.021218
8859	299.203	2	0	1	0	0	0	0.0213476
8861	299.236	2	0	1	0	0	0	0.0215196
8863	299.269	2	0	1	0	0	0	0.0214475
8865	299.303	2	0	1	0	0	0	0.0215131
8867	299.336	2	0	1	0	0	0	0.0216637
8869	299.369	2	0	1	0	0	0	0.0215916
8871	299.403	2	0	1	0	0	0	0.0215977
8873	299.436	2	0	1	0	0	0	0.0218316
8875	299.469	2	0	1	0	0	0	0.0217365
8877	299.503	2	0	1	0	0	0	0.0216861
8879	299.536	2	0	1	0	0	0	0.0218052
8881	299.569	2	0	1	0	0	0	0.0216661
8883	299.603	2	0	1	0	0	0	0.0217453
8885	299.636	2	0	1	0	0	0	0.021946
8887	299.669	2	0	1	0	0	0	0.0218982
8889	299.703	2	0	1	0	0	0	0.0218241
8891	299.736	2	0	1	0	0	0	0.021774
8893	299.769	2	0	1	0	0	0	0.0218786
8895	299.803	2	0	1	0	0	0	0.0217554
8897	299.836	2	0	1	0	0	0	0.021663
8899	299.869	2	0	1	0	0	0	0.0216759
8901	299.903	2	0	1	0	0	0	0.0218096
8903	299.936	2	0	1	0	0	0	0.0217534
8905	299.969	2	0	1	0	0	0	0.0218292
8907	300.003	2	0	1	0	0	0	0.02199
8909	300.036	2	0	1	0	0	0	0.0219368
8911	300.069	2	0	1	0	0	0	0.0218177
8913	300.103	2	0	1	0	0	0	0.0218275
8915	300.136	2	0	1	0	0	0	0.0219341
8917	300.169	2	0	1	0	0	0	0.0218803
8919	300.203	2	0	1	0	0	0	0.021882
8921	300.236	2	0	1	0	0	0	0.0218708
8923	300.269	2	0	1	0	0	0	0.022017
8925	300.303	2	0	1	0	0	0	0.0219896
8927	300.336	2	0	1	0	0	0	0.0220136
8929	300.369	2	0	1	0	0	0	0.0220624
8931	300.403	2	0	1	0	0	0	0.0219913
8933	300.436	2	0	1	0	0	0	0.0223653
8935	300.469	2	0	1	0	0	0	0.0226353
8937	300.503	2	0	1	0	0	0	0.0225639
8939	300.536	2	0	1	0	0	0	0.0223947
8941	300.569	2	0	1	0	0	0	0.0224018
8943	300.603	2	0	1	0	0	0	0.0222983
8945	300.636	2	0	1	0	0	0	0.0222316
8947	300.669	2	0	1	0	0	0	0.0222316
8949	300.703	2	0	1	0	0	0	0.022081
8951	300.736	2	0	1	0	0	0	0.0219778
8953	300.769	2	0	1	0	0	0	0.0220377
8955	300.803	2	0	1	0	0	0	0.0220339
8957	300.836	2	0	1	0	0	0	0.0219673
8959	300.869	2	0	1	0	0	0	0.021902
8961	300.903	2	0	1	0	0	0	0.0220319
8963	300.936	2	0	1	0	0	0	0.0217744
8965	300.969	2	0	1	0	0	0	0.0218996
8967	301.003	2	0	1	0	0	0	0.0222025
8969	301.036	2	0	1	0	0	0	0.0221842
8971	301.069	2	0	1	0	0	0	0.0220938
8973	301.103	2	0	1	0	0	0	0.0220969
8975	301.136	2	0	1	0	0	0	0.0221318
8977	301.169	2	0	1	0	0	0	0.0220289
8979	301.203	2	0	1	0	0	0	0.022016
8981	301.236	2	0	1	0	0	0	0.0221216
8983	301.269	2	0	1	0	0	0	0.0219879
8985	301.303	2	0	1	0	0	0	0.02188
8987	301.336	2	0	1	0	0	0	0.0220079
8989	301.369	2	0	1	0	0	0	0.0220038
8991	301.403	2	0	1	0	0	0	0.0220394
8993	301.436	2	0	1	0	0	0	0.0221155
8995	301.469	2	0	1	0	0	0	0.0220441
8997	301.503	2	0	1	0	0	0	0.0221162
8999	301.536	2	0	1	0	0	0	0.0222255
9001	301.569	2	0	1	0	0	0	0.0221788
9003	301.603	2	0	1	0	0	0	0.0221663
9005	301.636	2	0	1	0	0	0	0.0223145
9007	301.669	2	0	1	0	0	0	0.0223037
9009	301.703	2	0	1	0	0	0	0.0222698
9011	301.736	2	0	1	0	0	0	0.0224038
9013	301.769	2	0	1	0	0	0	0.0223737
9015	301.803	2	0	1	0	0	0	0.0222282
9017	301.836	2	0	1	0	0	0	0.022259
9019	301.869	2	0	1	0	0	0	0.0222018
9021	301.903	2	0	1	0	0	0	0.0222167
9023	301.936	2	0	1	0	0	0	0.0222719
9025	301.969	2	0	1	0	0	0	0.0222032
9027	302.003	2	0	1	0	0	0	0.0221311
9029	302.036	2	0	1	0	0	0	0.0221625
9031	302.069	2	0	1	0	0	0	0.0219619
9033	302.103	2	0	1	0	0	0	0.022015
9035	302.136	2	0	1	0	0	0	0.0218306
9037	302.169	2	0	1	0	0	0	0.0217307
9039	302.203	2	0	1	0	0	0	0.0217795
9041	302.236	2	0	1	0	0	0	0.021658
9043	302.269	2	0	1	0	0	0	0.02164
9045	302.303	2	0	1	0	0	0	0.0216194
9047	302.336	2	0	1	0	0	0	0.0215155
9049	302.369	2	0	1	0	0	0	0.0214461
9051	302.403	2	0	1	0	0	0	0.0218228
9053	302.436	2	0	1	0	0	0	0.0216756
9055	302.469	2	0	1	0	0	0	0.0216099
9057	302.503	2	0	1	0	0	0	0.0216119
9059	302.536	2	0	1	0	0	0	0.0216935
9061	302.569	2	0	1	0	0	0	0.0215101
9063	302.603	2	0	1	0	0	0	0.0214427
9065	302.636	2	0	1	0	0	0	0.0215575
9067	302.669	2	0	1	0	0	0	0.0214096
9069	302.703	2	0	1	0	0	0	0.0215707
9071	302.736	2	0	1	0	0	0	0.021879
9073	302.769	2	0	1	0	0	0	0.0218414
9075	302.802	2	0	1	0	0	0	0.0217768
9077	302.836	2	0	1	0	0	0	0.0218004
9079	302.869	2	0	1	0	0	0	0.0215619
9081	302.902	2	0	1	0	0	0	0.0211013
9083	302.936	2	0	1	0	0	0	0.0209679
9085	302.969	2	0	1	0	0	0	0.0211151
9087	303.002	2	0	1	0	0	0	0.0206184
9089	303.036	2	0	1	0	0	0	0.0205517
9091	303.069	2	0	1	0	0	0	0.0205182
9093	303.102	2	0	1	0	0	0	0.0205612
9095	303.136	2	0	1	0	0	0	0.0207981
9097	303.169	2	0	1	0	0	0	0.0207202
9099	303.202	2	0	1	0	0	0	0.0206573
9101	303.236	2	0	1	0	0	0	0.0210079
9103	303.269	2	0	1	0	0	0	0.0211619
9105	303.302	2	0	1	0	0	0	0.0207415
9107	303.336	2	0	1	0	0	0	0.0206701
9109	303.369	2	0	1	0	0	0	0.0204942
9111	303.402	2	0	1	0	0	0	0.0205645
9113	303.436	2	0	1	0	0	0	0.0207845
9115	303.469	2	0	1	0	0	0	0.0206783
9117	303.502	2	0	1	0	0	0	0.0208349
9119	303.536	2	0	1	0	0	0	0.0209351
9121	303.569	2	0	1	0	0	0	0.020975
9123	303.602	2	0	1	0	0	0	0.0209703
9125	303.636	2	0	1	0	0	0	0.0209378
9127	303.669	2	0	1	0	0	0	0.0211974
9129	303.702	2	0	1	0	0	0	0.021258
9131	303.736	2	0	1	0	0	0	0.0209568
9133	303.769	2	0	1	0	0	0	0.0207561
9135	303.802	2	0	1	0	0	0	0.0206732
9137	303.836	2	0	1	0	0	0	0.020752
9139	303.869	2	0	1	0	0	0	0.0207615
9141	303.902	2	0	1	0	0	0	0.0206556
9143	303.936	2	0	1	0	0	0	0.0207236
9145	303.969	2	0	1	0	0	0	0.0209223
9147	304.002	2	0	1	0	0	0	0.0209534
9149	304.036	2	0	1	0	0	0	0.0211663
9151	304.069	2	0	1	0	0	0	0.0211987
9153	304.102	2	0	1	0	0	0	0.0210627
9155	304.136	2	0	1	0	0	0	0.0210965
9157	304.169	2	0	1	0	0	0	0.0211832
9159	304.202	2	0	1	0	0	0	0.0211192
9161	304.236	2	0	1	0	0	0	0.0212854
9163	304.269	2	0	1	0	0	0	0.0215906
9165	304.302	2	0	1	0	0	0	0.0218167
9167	304.336	2	0	1	0	0	0	0.0217043
9169	304.369	2	0	1	0	0	0	0.0216096
9171	304.402	2	0	1	0	0	0	0.0214542
9173	304.436	2	0	1	0	0	0	0.0212948
9175	304.469	2	0	1	0	0	0	0.0215588
9177	304.502	2	0	1	0	0	0	0.0216407
9179	304.536	2	0	1	0	0	0	0.0216427
9181	304.569	2	0	1	0	0	0	0.0216485
9183	304.602	2	0	1	0	0	0	0.0218468
9185	304.636	2	0	1	0	0	0	0.0219747
9187	304.669	2	0	1	0	0	0	0.0220438
9189	304.702	2	0	1	0	0	0	0.022018
9191	304.736	2	0	1	0	0	0	0.0219903
9193	304.769	2	0	1	0	0	0	0.021926
9195	304.802	2	0	1	0	0	0	0.0219669
9197	304.836	2	0	1	0	0	0	0.0220241
9199	304.869	2	0	1	0	0	0	0.0220187
9201	304.902	2	0	1	0	0	0	0.0218827
9203	304.936	2	0	1	0	0	0	0.0220945
9205	304.969	2	0	1	0	0	0	0.0222895
9207	305.002	2	0	1	0	0	0	0.0225693
9209	305.036	2	0	1	0	0	0	0.0226434
9211	305.069	2	0	1	0	0	0	0.0229077
9213	305.102	2	0	1	0	0	0	0.0231971
9215	305.136	2	0	1	0	0	0	0.0234759
9217	305.169	2	0	1	0	0	0	0.0234661
9219	305.202	2	0	1	0	0	0	0.0235402
9221	305.236	2	0	1	0	0	0	0.0234692
9223	305.269	2	0	1	0	0	0	0.0233206
9225	305.302	2	0	1	0	0	0	0.0232979
9227	305.336	2	0	1	0	0	0	0.0233037
9229	305.369	2	0	1	0	0	0	0.0231494
9231	305.402	2	0	1	0	0	0	0.0228577
9233	305.436	2	0	1	0	0	0	0.0228719
9235	305.469	2	0	1	0	0	0	0.0231467
9237	305.502	2	0	1	0	0	0	0.0229382
9239	305.536	2	0	1	0	0	0	0.0229842
9241	305.569	2	0	1	0	0	0	0.0229859
9243	305.602	2	0	1	0	0	0	0.0229758
9245	305.636	2	0	1	0	0	0	0.0228421
9247	305.669	2	0	1	0	0	0	0.0227978
9249	305.702	2	0	1	0	0	0	0.0226881
9251	305.736	2	0	1	0	0	0	0.0227003
9253	305.769	2	0	1	0	0	0	0.0221663
9255	305.802	2	0	1	0	0	0	0.0219578
9257	305.836	2	0	1	0	0	0	0.0222722
9259	305.869	2	0	1	0	0	0	0.022769
9261	305.902	2	0	1	0	0	0	0.0226617
9263	305.936	2	0	1	0	0	0	0.0224627
9265	305.969	2	0	1	0	0	0	0.0224962
9267	306.002	2	0	1	0	0	0	0.0224607
9269	306.036	2	0	1	0	0	0	0.022237
9271	306.069	2	0	1	0	0	0	0.0222837
9273	306.102	2	0	1	0	0	0	0.0224631
9275	306.136	2	0	1	0	0	0	0.0224211
9277	306.169	2	0	1	0	0	0	0.0223517
9279	306.202	2	0	1	0	0	0	0.0224959
9281	306.236	2	0	1	0	0	0	0.0228309
9283	306.269	2	0	1	0	0	0	0.0228786
9285	306.302	2	0	1	0	0	0	0.0229629
9287	306.336	2	0	1	0	0	0	0.0231199
9289	306.369	2	0	1	0	0	0	0.0230201
9291	306.402	2	0	1	0	0	0	0.0232651
9293	306.436	2	0	1	0	0	0	0.0232066
9295	306.469	2	0	1	0	0	0	0.0231264
9297	306.502	2	0	1	0	0	0	0.0236712
9299	306.536	2	0	1	0	0	0	0.0238783
9301	306.569	2	0	1	0	0	0	0.0239978
9303	306.602	2	0	1	0	0	0	0.024059
9305	306.636	2	0	1	0	0	0	0.0240123
9307	306.669	2	0	1	0	0	0	0.0240221
9309	306.702	2	0	1	0	0	0	0.0238905
9311	306.736	2	0	1	0	0	0	0.0237375
9313	306.769	2	0	1	0	0	0	0.0238127
9315	306.802	2	0	1	0	0	0	0.0238083
9317	306.836	2	0	1	0	0	0	0.0236235
9319	306.869	2	0	1	0	0	0	0.0236594
9321	306.902	2	0	1	0	0	0	0.0235122
9323	306.936	2	0	1	0	0	0	0.0235179
9325	306.969	2	0	1	0	0	0	0.0236702
9327	307.002	2	0	1	0	0	0	0.0237142
9329	307.036	2	0	1	0	0	0	0.0238509
9331	307.069	2	0	1	0	0	0	0.0238282
9333	307.102	2	0	1	0	0	0	0.0239037
9335	307.136	2	0	1	0	0	0	0.0239555
9337	307.169	2	0	1	0	0	0	0.0238103
9339	307.202	2	0	1	0	0	0	0.0237446
9341	307.236	2	0	1	0	0	0	0.0236939
9343	307.269	2	0	1	0	0	0	0.0236167
9345	307.302	2	0	1	0	0	0	0.0236367
9347	307.336	2	0	1	0	0	0	0.0235406
9349	307.369	2	0	1	0	0	0	0.0234079
9351	307.402	2	0	1	0	0	0	0.0233091
9353	307.436	2	0	1	0	0	0	0.0232343
9355	307.469	2	0	1	0	0	0	0.0231392
9357	307.502	2	0	1	0	0	0	0.0231582
9359	307.536	2	0	1	0	0	0	0.0231761
9361	307.569	2	0	1	0	0	0	0.0232059
9363	307.602	2	0	1	0	0	0	0.0230942
9365	307.636	2	0	1	0	0	0	0.0229138
9367	307.669	2	0	1	0	0	0	0.0229084
9369	307.702	2	0	1	0	0	0	0.0228891
9371	307.736	2	0	1	0	0	0	0.0230133
9373	307.769	2	0	1	0	0	0	0.0230015
9375	307.802	2	0	1	0	0	0	0.0229785
9377	307.836	2	0	1	0	0	0	0.0230326
9379	307.869	2	0	1	0	0	0	0.0229104
9381	307.902	2	0	1	0	0	0	0.0228289
9383	307.936	2	0	1	0	0	0	0.0228279
9385	307.969	2	0	1	0	0	0	0.0227771
9387	308.002	2	0	1	0	0	0	0.0228624
9389	308.036	2	0	1	0	0	0	0.0229808
9391	308.069	2	0	1	0	0	0	0.0229365
9393	308.102	2	0	1	0	0	0	0.0230837
9395	308.136	2	0	1	0	0	0	0.0230201
9397	308.169	2	0	1	0	0	0	0.0229162
9399	308.202	2	0	1	0	0	0	0.022971
9401	308.236	2	0	1	0	0	0	0.0229209
9403	308.269	2	0	1	0	0	0	0.022883
9405	308.302	2	0	1	0	0	0	0.0230211
9407	308.336	2	0	1	0	0	0	0.0228187
9409	308.369	2	0	1	0	0	0	0.0228143
9411	308.402	2	0	1	0	0	0	0.0227209
9413	308.436	2	0	1	0	0	0	0.0225673
9415	308.469	2	0	1	0	0	0	0.022635
9417	308.502	2	0	1	0	0	0	0.0224935
9419	308.536	2	0	1	0	0	0	0.0224265
9421	308.569	2	0	1	0	0	0	0.0225944
9423	308.602	2	0	1	0	0	0	0.0226522
9425	308.636	2	0	1	0	0	0	0.0226857
9427	308.669	2	0	1	0	0	0	0.0228424
9429	308.702	2	0	1	0	0	0	0.0228688
9431	308.736	2	0	1	0	0	0	0.0230059
9433	308.769	2	0	1	0	0	0	0.0231044
9435	308.802	2	0	1	0	0	0	0.0231132
9437	308.836	2	0	1	0	0	0	0.0233981
9439	308.869	2	0	1	0	0	0	0.0234404
9441	308.902	2	0	1	0	0	0	0.0233805
9443	308.936	2	0	1	0	0	0	0.0235443
9445	308.969	2	0	1	0	0	0	0.0233981
9447	309.002	2	0	1	0	0	0	0.0232915
9449	309.036	2	0	1	0	0	0	0.0233027
9451	309.069	2	0	1	0	0	0	0.0232167
9453	309.102	2	0	1	0	0	0	0.0231504
9455	309.136	2	0	1	0	0	0	0.023144
9457	309.169	2	0	1	0	0	0	0.0230705
9459	309.202	2	0	1	0	0	0	0.0229923
9461	309.236	2	0	1	0	0	0	0.0229132
9463	309.269	2	0	1	0	0	0	0.0227274
9465	309.302	2	0	1	0	0	0	0.0227372
9467	309.336	2	0	1	0	0	0	0.0226191
9469	309.369	2	0	1	0	0	0	0.0224681
9471	309.402	2	0	1	0	0	0	0.0224955
9473	309.436	2	0	1	0	0	0	0.0224485
9475	309.469	2	0	1	0	0	0	0.022346
9477	309.502	2	0	1	0	0	0	0.0223947
9479	309.536	2	0	1	0	0	0	0.0222959
9481	309.569	2	0	1	0	0	0	0.0221974
9483	309.602	2	0	1	0	0	0	0.0222184
9485	309.636	2	0	1	0	0	0	0.0221534
9487	309.669	2	0	1	0	0	0	0.0220854
9489	309.702	2	0	1	0	0	0	0.0220959
9491	309.736	2	0	1	0	0	0	0.0220536
9493	309.769	2	0	1	0	0	0	0.0220252
9495	309.802	2	0	1	0	0	0	0.0221243
9497	309.836	2	0	1	0	0	0	0.0222698
9499	309.869	2	0	1	0	0	0	0.0223301
9501	309.902	2	0	1	0	0	0	0.0223219
9503	309.936	2	0	1	0	0	0	0.0223504
9505	309.969	2	0	1	0	0	0	0.0222803
9507	310.002	2	0	1	0	0	0	0.0223226
9509	310.036	2	0	1	0	0	0	0.0224191
9511	310.069	2	0	1	0	0	0	0.022325
9513	310.102	2	0	1	0	0	0	0.0222563
9515	310.136	2	0	1	0	0	0	0.0222448
9517	310.169	2	0	1	0	0	0	0.0221263
9519	310.202	2	0	1	0	0	0	0.0221081
9521	310.236	2	0	1	0	0	0	0.0221104
9523	310.269	2	0	1	0	0	0	0.0219402
9525	310.302	2	0	1	0	0	0	0.0219805
9527	310.336	2	0	1	0	0	0	0.0219734
9529	310.369	2	0	1	0	0	0	0.0219226
9531	310.402	2	0	1	0	0	0	0.0220502
9533	310.436	2	0	1	0	0	0	0.0221233
9535	310.469	2	0	1	0	0	0	0.0220546
9537	310.502	2	0	1	0	0	0	0.0221179
9539	310.536	2	0	1	0	0	0	0.0221913
9541	310.569	2	0	1	0	0	0	0.0220214
9543	310.602	2	0	1	0	0	0	0.0220323
9545	310.636	2	0	1	0	0	0	0.0220719
9547	310.669	2	0	1	0	0	0	0.0219615
9549	310.702	2	0	1	0	0	0	0.0219179
9551	310.736	2	0	1	0	0	0	0.0220306
9553	310.769	2	0	1	0	0	0	0.0219954
9555	310.802	2	0	1	0	0	0	0.0220593
9557	310.836	2	0	1	0	0	0	0.0222942
9559	310.869	2	0	1	0	0	0	0.0222434
9561	310.902	2	0	1	0	0	0	0.0222218
9563	310.936	2	0	1	0	0	0	0.022301
9565	310.969	2	0	1	0	0	0	0.022234
9567	311.002	2	0	1	0	0	0	0.0222059
9569	311.036	2	0	1	0	0	0	0.0222441
9571	311.069	2	0	1	0	0	0	0.0221906
9573	311.102	2	0	1	0	0	0	0.0221104
9575	311.136	2	0	1	0	0	0	0.0222695
9577	311.169	2	0	1	0	0	0	0.0222925
9579	311.202	2	0	1	0	0	0	0.0223324
9581	311.236	2	0	1	0	0	0	0.0223612
9583	311.269	2	0	1	0	0	0	0.0223629
9585	311.302	2	0	1	0	0	0	0.0223477
9587	311.336	2	0	1	0	0	0	0.0225294
9589	311.369	2	0	1	0	0	0	0.0224901
9591	311.402	2	0	1	0	0	0	0.0223988
9593	311.435	2	0	1	0	0	0	0.0223524
9595	311.469	2	0	1	0	0	0	0.0223531
9597	311.502	2	0	1	0	0	0	0.0223693
9599	311.535	2	0	1	0	0	0	0.0224705
9601	311.569	2	0	1	0	0	0	0.0224038
9603	311.602	2	0	1	0	0	0	0.0224258
9605	311.635	2	0	1	0	0	0	0.0224316
9607	311.669	2	0	1	0	0	0	0.0224516
9609	311.702	2	0	1	0	0	0	0.0223791
9611	311.735	2	0	1	0	0	0	0.0222472
9613	311.769	2	0	1	0	0	0	0.0221605
9615	311.802	2	0	1	0	0	0	0.0222986
9617	311.835	2	0	1	0	0	0	0.0222891
9619	311.869	2	0	1	0	0	0	0.0221845
9621	311.902	2	0	1	0	0	0	0.0221226
9623	311.935	2	0	1	0	0	0	0.0220769
9625	311.969	2	0	1	0	0	0	0.0219788
9627	312.002	2	0	1	0	0	0	0.0219764
9629	312.035	2	0	1	0	0	0	0.0220025
9631	312.069	2	0	1	0	0	0	0.0221114
9633	312.102	2	0	1	0	0	0	0.0222319
9635	312.135	2	0	1	0	0	0	0.0222972
9637	312.169	2	0	1	0	0	0	0.0222109
9639	312.202	2	0	1	0	0	0	0.0221104
9641	312.235	2	0	1	0	0	0	0.0222952
9643	312.269	2	0	1	0	0	0	0.0225071
9645	312.302	2	0	1	0	0	0	0.0224939
9647	312.335	2	0	1	0	0	0	0.0223862
9649	312.369	2	0	1	0	0	0	0.0224526
9651	312.402	2	0	1	0	0	0	0.0223385
9653	312.435	2	0	1	0	0	0	0.0222857
9655	312.469	2	0	1	0	0	0	0.0220959
9657	312.502	2	0	1	0	0	0	0.021951
9659	312.535	2	0	1	0	0	0	0.0222187
9661	312.569	2	0	1	0	0	0	0.0223152
9663	312.602	2	0	1	0	0	0	0.0222735
9665	312.635	2	0	1	0	0	0	0.0222316
9667	312.669	2	0	1	0	0	0	0.0222532
9669	312.702	2	0	1	0	0	0	0.0222607
9671	312.735	2	0	1	0	0	0	0.0222028
9673	312.769	2	0	1	0	0	0	0.022213
9675	312.802	2	0	1	0	0	0	0.022262
9677	312.835	2	0	1	0	0	0	0.0223341
9679	312.869	2	0	1	0	0	0	0.0226245
9681	312.902	2	0	1	0	0	0	0.0230001
9683	312.935	2	0	1	0	0	0	0.0231165
9685	312.969	2	0	1	0	0	0	0.0231142
9687	313.002	2	0	1	0	0	0	0.0232455
9689	313.035	2	0	1	0	0	0	0.0231176
9691	313.069	2	0	1	0	0	0	0.0230214
9693	313.102	2	0	1	0	0	0	0.0231135
9695	313.135	2	0	1	0	0	0	0.0229683
9697	313.169	2	0	1	0	0	0	0.0229375
9699	313.202	2	0	1	0	0	0	0.0230658
9701	313.235	2	0	1	0	0	0	0.0229294
9703	313.269	2	0	1	0	0	0	0.0228201
[truncated: 34,873 more rows]

## Sheet: Mouse_4_415_Signal
FrameCounter	Timestamp	LedState	Stimulation	Output0	Output1	Input0	Input1	Region0G
[truncated: 36,166 more rows]

[truncated: 11 more sheets: Mouse_4_470_Signal, Mouse_5_415_Signal, Mouse_5_470_Signal, Mouse_6_415_Signal, Mouse_6_470_Signal, Mouse_7_415_Signal, Mouse_7_470_Signal, Mouse_8_415_Signal, Mouse_8_470_Signal, Mouse_9_415_Signal, Mouse_9_470_Signal]
